# Supplementary material for: Intrinsic mechanical sensitivity of mammalian auditory neurons as a contributor to sound-driven neural activity
Source: eLife. 2022 Mar 10;11:e74948. doi: 10.7554/eLife.74948 (PMC8942473; doi:10.7554/eLife.74948)
Supplement: Figure 1—figure supplement 1—source data 1. [file elife-74948-fig1-figsupp1-data1.xls]

## Sheet: Figure 1-supplement data 1 (S1a
	n=5	n=5							Effect of bath solution flow rate on the SGN firing rate.
0	0
0.5	-
1	0.2612	0.109
1.5	-	--
2	0.529	0.211
4	-	--
6	0.89039	0.138
8	1	0.129
10	1	0.105

## Sheet: S1b
0	0		0	0		0.7	0					Cumulative binomial distribution of the mechanical threshold (mean cell-body displacement in mm) to elicit APs in mechanically-sensitive SGNs.
0.1	2		0.05	3		0.75	3
0.2	9		0.1	6		0.8	4					Histogram
0.3	17		0.15	12		0.85	6
0.4	31		0.2	15		0.9	9
0.5	42		0.25	20		0.95	11
0.6	24		0.3	16		1	8
0.7	19		0.35	11		1.05	6
0.8	10		0.4	2		1.1	5
0.9	6					1.15	3
1	4					1.2	1

## Sheet: S1c
Time	MP (mV)
0.2	-45.8679							A membrane response of an eight-week-old apical SGN at a current injection of 0.2 nA and perfusion flow rates of 3 and 6 ml/min
0.4	-45.8679
0.6	-45.6848
0.8	-45.5933
1	-46.051
1.2	-46.1121
1.4	-45.929							Figure 1- figure supplement 1
1.6	-46.051							Effect of bath solution flow rate on the SGN firing rate.
1.8	-46.2952
2	-45.7153
2.2	-46.1121
2.4	-46.051
2.6	-46.1731
2.8	-46.2341
3	-46.0815
3.2	-46.0205
3.4	-46.051
3.6	-46.1731
3.8	-46.1121
4	-45.99
4.2	-45.6848
4.4	-45.7764
4.6	-45.7153
4.8	-45.8984
5	-45.6543
5.2	-45.8069
5.4	-45.929
5.6	-45.7458
5.8	-45.6238
6	-46.0815
6.2	-46.2952
6.4	-46.2341
6.6	-46.1731
6.8	-46.2952
7	-46.2646
7.2	-46.1426
7.4	-46.2341
7.6	-46.2646
7.8	-46.1731
8	-46.1121
8.2	-46.1426
8.4	-46.1121
8.6	-45.929
8.8	-45.7458
9	-45.8984
9.2	-45.8984
9.4	-45.99
9.6	-45.5322
9.8	-45.8679
10	-45.7458
10.2	-45.2576
10.4	-45.7764
10.6	-45.6238
10.8	-45.6848
11	-45.6238
11.2	-45.5322
11.4	-45.7764
11.6	-45.5017
11.8	-45.6543
12	-45.3186
12.2	-45.2881
12.4	-45.7153
12.6	-45.6238
12.8	-45.4712
13	-45.6848
13.2	-45.4102
13.4	-45.6238
13.6	-45.1965
13.8	-45.6543
14	-45.4712
14.2	-45.3491
14.4	-45.0439
14.6	-45.166
14.8	-45.3186
15	-45.4102
15.2	-45.4712
15.4	-45.4712
15.6	-45.5017
15.8	-45.5322
16	-45.5933
16.2	-45.3491
16.4	-45.2881
16.6	-45.1965
16.8	-45.3186
17	-45.5933
17.2	-45.7153
17.4	-45.8069
17.6	-45.5627
17.8	-45.7764
18	-45.9595
18.2	-45.7458
18.4	-45.8069
18.6	-46.0205
18.8	-45.7764
19	-45.99
19.2	-45.7458
19.4	-45.99
19.6	-45.9595
19.8	-46.1731
20	-45.6848
20.2	-46.0205
20.4	-46.1731
20.6	-46.1121
20.8	-45.8374
21	-46.2341
21.2	-45.8374
21.4	-46.3257
21.6	-45.8679
21.8	-46.4478
22	-46.3562
22.2	-45.8984
22.4	-46.2952
22.6	-46.4172
22.8	-46.4172
23	-46.4172
23.2	-46.3867
23.4	-46.3257
23.6	-46.2036
23.8	-46.1121
24	-46.1426
24.2	-46.1426
24.4	-46.2341
24.6	-46.2341
24.8	-46.3867
25	-46.3562
25.2	-46.3867
25.4	-46.2952
25.6	-45.9595
25.8	-46.1121
26	-46.2341
26.2	-46.2036
26.4	-45.8374
26.6	-46.1426
26.8	-46.1121
27	-45.8374
27.2	-46.1121
27.4	-45.7764
27.6	-46.0815
27.8	-45.8679
28	-46.1121
28.2	-45.6238
28.4	-45.9595
28.6	-46.0205
28.8	-45.929
29	-46.051
29.2	-45.8679
29.4	-45.7764
29.6	-45.929
29.8	-45.8374
30	-45.929
30.2	-45.5322
30.4	-45.8984
30.6	-45.6848
30.8	-45.5322
31	-45.4102
31.2	-45.4712
31.4	-45.7153
31.6	-45.8374
31.8	-45.929
32	-45.6848
32.2	-45.5933
32.4	-45.7153
32.6	-45.5933
32.8	-45.5017
33	-45.4102
33.2	-45.166
33.4	-45.0439
33.6	-45.1965
33.8	-45.3796
34	-45.4407
34.2	-45.2576
34.4	-45.0134
34.6	-45.3796
34.8	-45.3491
35	-44.7693
35.2	-45.0439
35.4	-45.0745
35.6	-44.8914
35.8	-45.0745
36	-44.8303
36.2	-45.0439
36.4	-44.7388
36.6	-44.9524
36.8	-44.7693
37	-44.9524
37.2	-44.7998
37.4	-44.7388
37.6	-44.5557
37.8	-44.7388
38	-44.2505
38.2	-44.5862
38.4	-44.1894
38.6	-44.5557
38.8	-44.4641
39	-44.4031
39.2	-44.1589
39.4	-44.0369
39.6	-44.0979
39.8	-44.1894
40	-44.4031
40.2	-44.342
40.4	-44.2505
40.6	-44.281
40.8	-44.281
41	-44.0674
41.2	-44.1589
41.4	-44.4031
41.6	-44.5251
41.8	-44.6472
42	-44.7693
42.2	-44.4336
42.4	-44.8608
42.6	-45.0745
42.8	-45.1355
43	-45.1355
43.2	-45.3186
43.4	-45.1965
43.6	-45.5322
43.8	-45.4407
44	-45.4407
44.2	-45.5627
44.4	-45.6543
44.6	-45.6238
44.8	-45.8679
45	-45.6238
45.2	-46.051
45.4	-46.2646
45.6	-46.2036
45.8	-46.1426
46	-46.2036
46.2	-46.4172
46.4	-46.2036
46.6	-46.6614
46.8	-46.4478
47	-46.7224
47.2	-46.7529
47.4	-46.814
47.6	-46.7529
47.8	-46.6003
48	-46.5393
48.2	-46.6614
48.4	-46.6309
48.6	-46.7834
48.8	-46.8445
49	-47.1191
49.2	-47.2412
49.4	-47.3328
49.6	-47.5159
49.8	-47.6074
50	-47.5769
50.2	-47.1497
50.4	-47.3022
50.6	-47.5769
50.8	-47.5159
51	-47.1802
51.2	-47.5769
51.4	-47.6379
51.6	-47.2717
51.8	-47.5464
52	-47.3328
52.2	-47.5464
52.4	-47.2717
52.6	-47.5464
52.8	-47.1497
53	-47.5464
53.2	-47.1191
53.4	-47.3938
53.6	-47.0581
53.8	-47.0581
54	-46.8445
54.2	-47.2717
54.4	-47.0581
54.6	-46.9055
54.8	-47.0581
55	-46.7529
55.2	-46.9971
55.4	-46.7834
55.6	-46.4783
55.8	-46.6003
56	-46.6919
56.2	-46.6003
56.4	-46.6003
56.6	-46.5088
56.8	-46.4783
57	-46.3867
57.2	-46.3867
57.4	-46.3867
57.6	-46.2036
57.8	-46.051
58	-45.929
58.2	-45.99
58.4	-46.2646
58.6	-46.4172
58.8	-46.4172
59	-46.0205
59.2	-46.2646
59.4	-46.4478
59.6	-45.929
59.8	-46.2646
60	-46.2036
60.2	-46.051
60.4	-46.2952
60.6	-45.8984
60.8	-46.3257
61	-46.1426
61.2	-46.2646
61.4	-46.1121
61.6	-45.9595
61.8	-46.1731
62	-46.1731
62.2	-46.0815
62.4	-45.9595
62.6	-45.6543
62.8	-45.929
63	-45.5017
63.2	-45.929
63.4	-45.4712
63.6	-45.929
63.8	-45.8984
64	-45.6238
64.2	-45.5322
64.4	-45.7458
64.6	-45.8984
64.8	-45.8374
65	-45.6543
65.2	-45.6848
65.4	-45.7458
65.6	-45.8679
65.8	-45.8374
66	-45.929
66.2	-45.9595
66.4	-45.7458
66.6	-45.5017
66.8	-45.4102
67	-45.6848
67.2	-45.7153
67.4	-45.5933
67.6	-45.3491
67.8	-45.6848
68	-45.7458
68.2	-45.2881
68.4	-45.7764
68.6	-45.7764
68.8	-45.6238
69	-45.8374
69.2	-45.5322
69.4	-45.8069
69.6	-45.4712
69.8	-45.7458
70	-45.5322
70.2	-45.7458
70.4	-45.5933
70.6	-45.8069
70.8	-45.8374
71	-45.5017
71.2	-45.8374
71.4	-45.6848
71.6	-46.0205
71.8	-45.6543
72	-46.1426
72.2	-46.1121
72.4	-45.9595
72.6	-45.8984
72.8	-46.1121
73	-46.3257
73.2	-46.2646
73.4	-46.2036
73.6	-46.2952
73.8	-46.2646
74	-46.2952
74.2	-46.1731
74.4	-46.2036
74.6	-46.1121
74.8	-45.8984
75	-45.6848
75.2	-45.7153
75.4	-45.8984
75.6	-45.8984
75.8	-45.8374
76	-45.6238
76.2	-45.8679
76.4	-45.8984
76.6	-45.5017
76.8	-46.051
77	-45.9595
77.2	-45.7458
77.4	-46.0815
77.6	-45.7764
77.8	-45.929
78	-45.6848
78.2	-45.99
78.4	-45.7458
78.6	-46.051
78.8	-45.99
79	-46.0815
79.2	-45.6848
79.4	-46.1731
79.6	-45.7458
79.8	-46.1731
80	-45.6238
80.2	-45.929
80.4	-45.8984
80.6	-45.5933
80.8	-45.3796
81	-45.6238
81.2	-45.7458
81.4	-45.6543
81.6	-45.5933
81.8	-45.6238
82	-45.6238
82.2	-45.5933
82.4	-45.5627
82.6	-45.6848
82.8	-45.7458
83	-45.7458
83.2	-45.6238
83.4	-45.4407
83.6	-45.5322
83.8	-45.8374
84	-45.8374
84.2	-45.8679
84.4	-45.5017
84.6	-45.99
84.8	-45.8679
85	-45.6543
85.2	-45.6848
85.4	-45.9595
85.6	-45.5933
85.8	-45.9595
86	-45.7458
86.2	-45.7458
86.4	-45.7153
86.6	-45.7458
86.8	-45.6848
87	-45.4407
87.2	-45.6238
87.4	-45.8679
87.6	-45.5933
87.8	-45.8984
88	-45.5322
88.2	-45.99
88.4	-45.5627
88.6	-46.0205
88.8	-45.8984
89	-45.5322
89.2	-45.6848
89.4	-45.929
89.6	-45.929
89.8	-45.8984
90	-45.7764
90.2	-45.7764
90.4	-45.6238
90.6	-45.6238
90.8	-45.4407
91	-45.5017
91.2	-45.5627
91.4	-45.6238
91.6	-45.6848
91.8	-45.8374
92	-45.8374
92.2	-45.8069
92.4	-45.6238
92.6	-45.6238
92.8	-45.929
93	-46.0205
93.2	-45.8374
93.4	-46.1121
93.6	-46.3562
93.8	-45.8984
94	-46.2646
94.2	-46.1731
94.4	-46.1426
94.6	-46.2341
94.8	-46.2341
95	-46.2341
95.2	-45.8069
95.4	-45.929
95.6	-45.8069
95.8	-46.2036
96	-46.0205
96.2	-46.2952
96.4	-45.8984
96.6	-46.2646
96.8	-45.8069
97	-46.1426
97.2	-46.2646
97.4	-46.051
97.6	-45.8679
97.8	-46.1731
98	-46.3257
98.2	-46.2341
98.4	-46.2341
98.6	-46.2646
98.8	-46.1121
99	-46.051
99.2	-46.0205
99.4	-46.1426
99.6	-46.1426
99.8	-46.051
100	-46.2341
100.2	-46.2036
100.4	-45.929
100.6	-45.7764
100.8	-46.1121
101	-46.2341
101.2	-46.2341
101.4	-45.8984
101.6	-46.2646
101.8	-46.2646
102	-45.7153
102.2	-46.0815
102.4	-45.8374
102.6	-45.8984
102.8	-46.0205
103	-45.8679
103.2	-46.1121
103.4	-45.8069
103.6	-46.0205
103.8	-46.051
104	-45.8679
104.2	-45.8679
104.4	-46.0205
104.6	-45.8984
104.8	-46.051
105	-46.1121
105.2	-46.1121
105.4	-45.8374
105.6	-46.2341
105.8	-46.2952
106	-46.1426
106.2	-45.929
106.4	-46.1426
106.6	-46.2341
106.8	-46.3867
107	-46.3257
107.2	-46.3257
107.4	-46.3562
107.6	-46.4172
107.8	-46.3867
108	-46.3867
108.2	-46.4172
108.4	-46.2646
108.6	-46.1731
108.8	-46.4478
109	-46.6003
109.2	-46.7834
109.4	-46.6309
109.6	-46.5393
109.8	-46.875
110	-46.9055
110.2	-46.5088
110.4	-46.875
110.6	-46.814
110.8	-46.814
111	-46.9971
111.2	-46.7529
111.4	-46.9971
111.6	-46.7224
111.8	-46.9971
112	-47.0276
112.2	-46.9665
112.4	-46.875
112.6	-46.5088
112.8	-46.9665
113	-46.7224
113.2	-46.7224
113.4	-46.5393
113.6	-46.6309
113.8	-46.1731
114	-46.2341
114.2	-46.5393
114.4	-46.4783
114.6	-46.2952
114.8	-46.051
115	-45.929
115.2	-45.99
115.4	-46.0205
115.6	-45.9595
115.8	-46.0205
116	-46.0205
116.2	-45.929
116.4	-45.6543
116.6	-45.7153
116.8	-45.8069
117	-45.9595
117.2	-45.99
117.4	-46.0815
117.6	-45.8069
117.8	-45.8984
118	-46.1121
118.2	-46.0815
118.4	-45.6848
118.6	-45.929
118.8	-45.99
119	-45.8374
119.2	-45.99
119.4	-45.4407
119.6	-45.8679
119.8	-45.4712
120	-45.8679
120.2	-45.6848
120.4	-45.5322
120.6	-45.6238
120.8	-45.7153
121	-45.3186
121.2	-45.8069
121.4	-45.6848
121.6	-45.7458
121.8	-45.6848
122	-45.8679
122.2	-45.5933
122.4	-45.3796
122.6	-45.7153
122.8	-45.6848
123	-45.5627
123.2	-45.4712
123.4	-45.3491
123.6	-45.2576
123.8	-45.105
124	-45.0134
124.2	-45.0439
124.4	-45.0745
124.6	-45.105
124.8	-45.166
125	-45.3796
125.2	-45.3491
125.4	-45.3186
125.6	-45.166
125.8	-44.9219
126	-45.0745
126.2	-45.2881
126.4	-45.2576
126.6	-45.0745
126.8	-45.4712
127	-45.4102
127.2	-45.227
127.4	-45.3186
127.6	-44.8914
127.8	-45.3186
128	-44.9524
128.2	-45.2576
128.4	-45.0134
128.6	-45.0439
128.8	-45.0134
129	-44.8303
129.2	-45.1355
129.4	-44.6472
129.6	-45.0745
129.8	-44.7082
130	-44.9524
130.2	-44.6167
130.4	-44.9829
130.6	-44.8608
130.8	-44.6472
131	-44.8303
131.2	-45.0439
131.4	-45.0134
131.6	-44.9829
131.8	-45.0439
132	-44.9524
132.2	-44.7998
132.4	-44.7693
132.6	-44.7388
132.8	-44.8914
133	-44.7998
133.2	-44.8608
133.4	-44.8914
133.6	-44.7998
133.8	-44.5862
134	-44.5251
134.2	-44.7998
134.4	-44.8914
134.6	-44.8914
134.8	-44.6167
135	-44.8608
135.2	-44.8303
135.4	-44.7082
135.6	-45.0134
135.8	-44.7082
136	-44.8914
136.2	-44.7693
136.4	-44.8914
136.6	-44.7082
136.8	-44.9524
137	-45.0745
137.2	-44.9829
137.4	-44.5862
137.6	-45.0439
137.8	-44.7082
138	-45.0745
138.2	-44.7693
138.4	-45.1355
138.6	-44.7388
138.8	-45.0439
139	-44.9524
139.2	-45.0134
139.4	-44.7388
139.6	-44.8303
139.8	-45.0134
140	-45.1965
140.2	-45.227
140.4	-45.0745
140.6	-45.105
140.8	-45.1965
141	-45.2576
141.2	-45.1965
141.4	-45.227
141.6	-45.227
141.8	-45.166
142	-44.8608
142.2	-44.8914
142.4	-45.227
142.6	-45.1965
142.8	-45.166
143	-44.9219
143.2	-45.3796
143.4	-45.3796
143.6	-44.9524
143.8	-45.5322
144	-45.3491
144.2	-45.3491
144.4	-45.5322
144.6	-45.2576
144.8	-45.5017
145	-45.2576
145.2	-45.5017
145.4	-45.5627
145.6	-45.4712
145.8	-45.1965
146	-45.6543
146.2	-45.3491
146.4	-45.6238
146.6	-45.3796
146.8	-45.6238
147	-45.1965
147.2	-45.5017
147.4	-45.7458
147.6	-45.7153
147.8	-45.5017
148	-45.3186
148.2	-45.6543
148.4	-45.7458
148.6	-45.8374
148.8	-45.9595
149	-45.929
149.2	-45.8984
149.4	-45.99
149.6	-45.929
149.8	-45.9595
150	-45.7764
150.2	-45.6848
150.4	-45.929
150.6	-46.0815
150.8	-46.1426
151	-46.0205
151.2	-45.8374
151.4	-46.2952
151.6	-46.2646
151.8	-45.99
152	-46.3867
152.2	-46.3867
152.4	-46.2036
152.6	-46.5393
152.8	-46.2036
153	-46.5088
153.2	-46.1121
153.4	-46.4783
153.6	-46.4783
153.8	-46.4478
154	-46.3562
154.2	-46.1121
154.4	-46.4172
154.6	-46.051
154.8	-46.3562
155	-46.2341
155.2	-46.3257
155.4	-45.8679
155.6	-46.2036
155.8	-46.6003
156	-46.5088
156.2	-46.2952
156.4	-46.2952
156.6	-46.4172
156.8	-46.6919
157	-46.814
157.2	-46.814
157.4	-46.814
157.6	-46.8445
157.8	-46.8445
158	-46.814
158.2	-46.7224
158.4	-46.6003
158.6	-46.5088
158.8	-46.7834
159	-46.9055
159.2	-46.875
159.4	-46.6614
159.6	-46.6309
159.8	-46.814
160	-46.7834
160.2	-46.4172
160.4	-46.6919
160.6	-46.4783
160.8	-46.4478
161	-46.6003
161.2	-46.4172
161.4	-46.5698
161.6	-46.3257
161.8	-46.6003
162	-46.6309
162.2	-46.5088
162.4	-46.2341
162.6	-46.2646
162.8	-46.3257
163	-46.3257
163.2	-46.1121
163.4	-46.3867
163.6	-46.2952
163.8	-45.929
164	-46.2952
164.2	-46.2341
164.4	-45.9595
164.6	-45.8069
164.8	-45.7458
165	-45.929
165.2	-46.0205
165.4	-46.051
165.6	-46.0205
165.8	-45.99
166	-45.929
166.2	-45.8069
166.4	-45.7458
166.6	-45.5017
166.8	-45.4712
167	-45.6848
167.2	-45.7458
167.4	-45.8374
167.6	-45.7458
167.8	-45.5322
168	-45.8374
168.2	-45.8374
168.4	-45.5933
168.6	-45.6848
168.8	-45.929
169	-45.5322
169.2	-45.8679
169.4	-45.8069
169.6	-45.8984
169.8	-45.7458
170	-45.99
170.2	-46.1121
170.4	-46.051
170.6	-45.99
170.8	-45.8069
171	-46.1121
171.2	-45.7458
171.4	-46.0815
171.6	-45.6238
171.8	-46.1731
172	-46.051
172.2	-45.8069
172.4	-46.2341
172.6	-46.0815
172.8	-45.929
173	-45.7764
173.2	-45.6543
173.4	-45.8069
173.6	-45.8069
173.8	-45.929
174	-45.929
174.2	-45.7764
174.4	-45.7764
174.6	-45.7458
174.8	-45.5627
175	-45.2881
175.2	-45.3186
175.4	-45.5322
175.6	-45.5017
175.8	-45.4407
176	-45.1965
176.2	-45.0439
176.4	-45.227
176.6	-45.1965
176.8	-44.8914
177	-45.227
177.2	-45.1355
177.4	-45.0134
177.6	-45.2881
177.8	-44.8914
178	-45.1965
178.2	-44.7693
178.4	-45.2576
178.6	-45.1355
178.8	-45.0745
179	-45.0134
179.2	-44.5862
179.4	-44.9524
179.6	-44.5251
179.8	-44.9524
180	-44.7388
180.2	-44.8914
180.4	-44.7082
180.6	-44.7082
180.8	-44.9524
181	-44.8303
181.2	-44.6777
181.4	-44.5862
181.6	-44.4336
181.8	-44.5557
182	-44.7693
182.2	-44.9524
182.4	-44.9829
182.6	-45.105
182.8	-45.1355
183	-45.0134
183.2	-44.8914
183.4	-45.0439
183.6	-45.4407
183.8	-45.6238
184	-45.8374
184.2	-45.8069
184.4	-45.7153
184.6	-46.0205
184.8	-46.1121
185	-45.99
185.2	-46.0815
185.4	-46.1731
185.6	-45.7458
185.8	-46.1121
186	-45.9595
186.2	-46.051
186.4	-46.0815
186.6	-46.1426
186.8	-46.1731
187	-45.99
187.2	-46.1731
187.4	-46.2341
187.6	-45.8374
187.8	-46.1426
188	-45.929
188.2	-46.2952
188.4	-45.99
188.6	-46.1731
188.8	-45.99
189	-46.0205
189.2	-46.2952
189.4	-46.2952
189.6	-46.4172
189.8	-46.2036
190	-46.1121
190.2	-45.8374
190.4	-46.0205
190.6	-46.051
190.8	-45.929
191	-46.0815
191.2	-46.0205
191.4	-46.0205
191.6	-46.0815
191.8	-46.2036
192	-46.2952
192.2	-46.1731
192.4	-45.929
192.6	-45.5322
192.8	-45.8374
193	-45.99
193.2	-45.7764
193.4	-45.8374
193.6	-45.9595
193.8	-45.5933
194	-45.8679
194.2	-45.929
194.4	-45.6238
194.6	-45.6848
194.8	-45.5017
195	-45.7458
195.2	-45.2576
195.4	-45.2576
195.6	-45.5322
195.8	-45.5322
196	-45.166
196.2	-45.6238
196.4	-45.3491
196.6	-45.5322
196.8	-45.227
197	-45.5017
197.2	-45.3796
197.4	-45.1965
197.6	-45.4712
197.8	-45.4407
198	-45.4102
198.2	-45.227
198.4	-45.0745
198.6	-44.9219
198.8	-44.7693
199	-44.7693
199.2	-44.7998
199.4	-44.7388
199.6	-44.8608
199.8	-44.7693
200	-45.0134
200.2	-45.105
200.4	-45.227
200.6	-45.0134
200.8	-44.8608
201	-45.2576
201.2	-45.4407
201.4	-45.5017
201.6	-45.4102
201.8	-45.6543
202	-45.6543
202.2	-45.3796
202.4	-45.5627
202.6	-45.227
202.8	-45.5933
203	-45.4407
203.2	-45.6848
203.4	-45.4712
203.6	-45.2881
203.8	-45.1355
204	-45.5933
204.2	-45.7458
204.4	-45.4712
204.6	-45.7153
204.8	-45.8069
205	-45.6848
205.2	-45.6238
205.4	-45.8679
205.6	-45.8374
205.8	-45.6238
206	-45.929
206.2	-46.0205
206.4	-45.8984
206.6	-45.8984
206.8	-45.7458
207	-45.7458
207.2	-45.6848
207.4	-45.6238
207.6	-45.5933
207.8	-45.5322
208	-45.5017
208.2	-45.5627
208.4	-45.5627
208.6	-45.6848
208.8	-45.3491
209	-45.1355
209.2	-45.3186
209.4	-45.4407
209.6	-45.3491
209.8	-44.8914
210	-45.2576
210.2	-45.3186
210.4	-44.6777
210.6	-45.0134
210.8	-44.7998
211	-44.8914
211.2	-44.7998
211.4	-44.7388
211.6	-44.9219
211.8	-44.5862
212	-44.6472
212.2	-44.4641
212.4	-44.7693
212.6	-44.8303
212.8	-44.7082
213	-44.8608
213.2	-44.9829
213.4	-44.7082
213.6	-44.7388
213.8	-44.9219
214	-44.9524
214.2	-44.5251
214.4	-44.6777
214.6	-45.0745
214.8	-45.0745
215	-45.1355
215.2	-45.105
215.4	-45.105
215.6	-45.0745
215.8	-44.9524
216	-45.105
216.2	-45.0745
216.4	-45.105
216.6	-45.105
216.8	-45.166
217	-45.0439
217.2	-44.8303
217.4	-45.0439
217.6	-45.2881
217.8	-45.227
218	-44.9524
218.2	-45.2576
218.4	-45.4102
218.6	-45.0439
218.8	-45.2881
219	-45.3186
219.2	-45.1965
219.4	-45.4102
219.6	-45.1355
219.8	-45.5017
220	-45.0439
220.2	-45.4102
220.4	-45.5017
220.6	-45.4407
220.8	-45.5322
221	-45.7153
221.2	-45.6848
221.4	-45.6543
221.6	-45.8374
221.8	-45.5322
222	-45.5017
222.2	-45.7764
222.4	-45.6848
222.6	-45.5322
222.8	-45.4407
223	-45.7764
223.2	-45.99
223.4	-46.051
223.6	-46.1121
223.8	-45.99
224	-46.051
224.2	-46.1426
224.4	-46.1731
224.6	-46.1121
224.8	-46.0815
225	-46.0815
225.2	-45.8374
225.4	-45.6238
225.6	-45.8374
225.8	-45.8984
226	-45.99
226.2	-45.6238
226.4	-45.6238
226.6	-45.9595
226.8	-45.6543
227	-45.5627
227.2	-45.7153
227.4	-45.3796
227.6	-45.5322
227.8	-45.1965
228	-45.4712
228.2	-45.105
228.4	-45.3491
228.6	-45.4407
228.8	-45.3491
229	-45.105
229.2	-45.1965
229.4	-45.166
229.6	-45.3491
229.8	-45.0134
230	-45.3796
230.2	-45.227
230.4	-44.8608
230.6	-45.1355
230.8	-45.0439
231	-44.9219
231.2	-44.7693
231.4	-44.8914
231.6	-45.1355
231.8	-45.2881
232	-45.3796
232.2	-45.4407
232.4	-45.4407
232.6	-45.6238
232.8	-45.5322
233	-45.4712
233.2	-45.3796
233.4	-45.0745
233.6	-45.0745
233.8	-45.3186
234	-45.5627
234.2	-45.6238
234.4	-45.3491
234.6	-45.3186
234.8	-45.5627
235	-45.5017
235.2	-45.166
235.4	-45.5017
235.6	-45.4407
235.8	-45.5627
236	-45.5627
236.2	-45.5017
236.4	-45.5933
236.6	-45.4407
236.8	-45.5017
237	-45.5933
237.2	-45.6848
237.4	-45.4407
237.6	-45.6238
237.8	-45.5322
238	-45.8069
238.2	-45.5017
238.4	-45.8984
238.6	-45.8374
238.8	-45.5627
239	-45.99
239.2	-45.99
239.4	-45.9595
239.6	-45.6238
239.8	-45.4102
240	-45.6848
240.2	-45.6543
240.4	-45.7153
240.6	-45.8374
240.8	-45.8069
241	-45.8069
241.2	-45.7458
241.4	-45.5627
241.6	-45.6238
241.8	-45.4712
242	-45.6848
242.2	-45.8374
242.4	-45.8984
242.6	-45.5017
242.8	-45.227
243	-45.6543
243.2	-45.7153
243.4	-45.3491
243.6	-45.6543
243.8	-45.6848
244	-45.5017
244.2	-45.8374
244.4	-45.4407
244.6	-45.8984
244.8	-45.4712
245	-45.8679
245.2	-45.8679
245.4	-45.8679
245.6	-46.051
245.8	-45.6848
246	-46.051
246.2	-45.8069
246.4	-46.051
246.6	-45.6848
246.8	-46.051
247	-46.0205
247.2	-45.5322
247.4	-45.929
247.6	-45.929
247.8	-45.8679
248	-45.6238
248.2	-45.3796
248.4	-45.2576
248.6	-45.3186
248.8	-45.3491
249	-45.2881
249.2	-45.3491
249.4	-45.3186
249.6	-45.2576
249.8	-45.2881
250	-45.3186
250.2	-45.5017
250.4	-45.5933
250.6	-45.5933
250.8	-45.5933
251	-45.3796
251.2	-45.7458
251.4	-46.051
251.6	-45.5933
251.8	-45.7153
252	-45.8679
252.2	-45.3796
252.4	-45.7458
252.6	-45.5627
252.8	-45.7764
253	-45.6543
253.2	-45.8069
253.4	-45.8069
253.6	-45.5322
253.8	-45.6238
254	-45.8069
254.2	-45.6543
254.4	-45.9595
254.6	-45.6238
254.8	-45.8984
255	-45.4712
255.2	-46.051
255.4	-45.99
255.6	-45.6238
255.8	-45.8679
256	-46.1426
256.2	-46.1426
256.4	-46.1426
256.6	-46.1121
256.8	-46.1731
257	-45.929
257.2	-45.99
257.4	-46.0205
257.6	-46.2341
257.8	-46.1426
258	-46.3867
258.2	-46.3867
258.4	-46.5088
258.6	-46.5393
258.8	-46.7224
259	-46.4783
259.2	-46.3257
259.4	-46.5698
259.6	-46.875
259.8	-46.6919
260	-46.5698
260.2	-46.9665
260.4	-46.6919
260.6	-46.7834
260.8	-46.6003
261	-46.4172
261.2	-46.6614
261.4	-46.4783
261.6	-46.7529
261.8	-46.4172
262	-46.3562
262.2	-46.5393
262.4	-46.7834
262.6	-46.4478
262.8	-46.9665
263	-46.3257
263.2	-46.875
263.4	-46.4783
263.6	-46.936
263.8	-46.7834
264	-46.3562
264.2	-46.6919
264.4	-46.7834
264.6	-46.5393
264.8	-46.4783
265	-46.3562
265.2	-46.2952
265.4	-46.1426
265.6	-46.1121
265.8	-46.1731
266	-46.051
266.2	-46.1731
266.4	-46.3257
266.6	-46.4478
266.8	-46.2646
267	-46.3257
267.2	-46.1731
267.4	-45.8679
267.6	-45.99
267.8	-46.1426
268	-46.1121
268.2	-45.6848
268.4	-46.1121
268.6	-46.3867
268.8	-46.051
269	-46.2341
269.2	-46.1121
269.4	-46.3867
269.6	-46.1426
269.8	-46.2646
270	-46.1121
270.2	-45.8984
270.4	-45.8984
270.6	-46.1426
270.8	-46.4783
271	-46.0815
271.2	-46.5088
271.4	-46.3562
271.6	-46.5698
271.8	-46.3562
272	-46.4783
272.2	-46.3867
272.4	-46.2952
272.6	-46.7224
272.8	-46.7224
273	-46.6919
273.2	-46.6003
273.4	-46.3867
273.6	-46.2036
273.8	-46.3562
274	-46.3562
274.2	-46.4478
274.4	-46.5088
274.6	-46.7529
274.8	-46.875
275	-46.936
275.2	-46.9665
275.4	-47.0886
275.6	-47.0581
275.8	-46.7224
276	-46.7224
276.2	-47.0581
276.4	-47.0581
276.6	-46.6003
276.8	-46.8445
277	-46.9665
277.2	-46.6614
277.4	-47.0276
277.6	-46.8445
277.8	-47.0581
278	-46.8445
278.2	-46.9055
278.4	-46.9665
278.6	-46.7834
278.8	-46.875
279	-46.8445
279.2	-46.5393
279.4	-46.875
279.6	-46.5088
279.8	-46.9665
280	-46.7529
280.2	-47.0886
280.4	-46.9055
280.6	-46.9055
280.8	-47.3022
281	-47.1802
281.2	-47.1497
281.4	-47.0276
281.6	-46.936
281.8	-46.875
282	-46.936
282.2	-46.9971
282.4	-46.9665
282.6	-46.936
282.8	-46.936
283	-46.7529
283.2	-46.6003
283.4	-46.6003
283.6	-46.7224
283.8	-47.0276
284	-46.814
284.2	-46.7224
284.4	-46.4783
284.6	-46.6003
284.8	-46.7224
285	-46.5088
285.2	-46.4172
285.4	-46.5698
285.6	-46.2036
285.8	-46.4172
286	-46.3867
286.2	-46.3257
286.4	-46.3562
286.6	-46.1731
286.8	-46.3562
287	-46.2341
287.2	-46.0815
287.4	-45.6848
287.6	-45.9595
287.8	-45.4407
288	-45.8069
288.2	-45.4407
288.4	-45.8069
288.6	-45.4407
288.8	-45.6543
289	-45.7153
289.2	-45.6238
289.4	-45.3491
289.6	-45.4407
289.8	-45.6238
290	-45.7458
290.2	-45.6543
290.4	-45.6848
290.6	-45.7458
290.8	-45.7153
291	-45.6543
291.2	-45.5933
291.4	-45.6848
291.6	-45.6238
291.8	-45.5017
292	-45.3186
292.2	-45.1965
292.4	-45.4407
292.6	-45.7153
292.8	-45.8679
293	-45.3491
293.2	-45.5933
293.4	-45.8984
293.6	-45.6543
293.8	-45.7458
294	-45.929
294.2	-45.6238
294.4	-46.0205
294.6	-45.6238
294.8	-46.0815
295	-45.8069
295.2	-45.929
295.4	-46.0205
295.6	-45.99
295.8	-46.4172
296	-46.051
296.2	-46.2952
296.4	-46.2952
296.6	-46.5393
296.8	-46.3257
297	-46.6003
297.2	-46.4172
297.4	-46.1731
297.6	-46.5698
297.8	-46.7224
298	-46.7834
298.2	-46.875
298.4	-46.7529
298.6	-46.6614
298.8	-46.6309
299	-46.5393
299.2	-46.5393
299.4	-46.6614
299.6	-46.7224
299.8	-46.7834
300	-46.7224
300.2	-46.7834
300.4	-46.7834
300.6	-46.6919
300.8	-46.3867
301	-46.6614
301.2	-46.9055
301.4	-47.0276
301.6	-46.6614
301.8	-47.0276
302	-47.1191
302.2	-46.6919
302.4	-47.0276
302.6	-46.814
302.8	-46.936
303	-46.8445
303.2	-46.9055
303.4	-47.1191
303.6	-46.9055
303.8	-46.936
304	-47.0581
304.2	-46.6614
304.4	-47.1802
304.6	-46.8445
304.8	-47.1802
305	-46.936
305.2	-47.0886
305.4	-46.8445
305.6	-46.9665
305.8	-47.1497
306	-46.9971
306.2	-46.936
306.4	-46.6309
306.6	-46.4783
306.8	-46.5698
307	-46.6614
307.2	-46.6919
307.4	-46.7529
307.6	-46.6309
307.8	-46.5393
308	-46.4783
308.2	-46.1426
308.4	-45.99
308.6	-45.8984
308.8	-45.99
309	-45.8374
309.2	-45.8679
309.4	-45.5017
309.6	-45.4407
309.8	-45.6238
310	-45.4712
310.2	-45.1965
310.4	-45.4712
310.6	-45.2576
310.8	-45.4102
311	-45.4407
311.2	-45.1355
311.4	-45.2576
311.6	-45.0439
311.8	-45.227
312	-45.2881
312.2	-45.1965
312.4	-44.8914
312.6	-45.2576
312.8	-44.9524
313	-45.2576
313.2	-45.1355
313.4	-45.3186
313.6	-44.8914
313.8	-45.3186
314	-45.3796
314.2	-44.9829
314.4	-44.7693
314.6	-45.0134
314.8	-45.2576
315	-45.105
315.2	-45.0745
315.4	-45.1355
315.6	-45.0439
315.8	-45.0134
316	-44.9829
316.2	-44.9829
316.4	-44.9829
316.6	-45.0745
316.8	-45.0134
317	-44.9219
317.2	-44.6472
317.4	-44.7388
317.6	-45.0439
317.8	-45.0439
318	-44.7082
318.2	-44.7693
318.4	-44.9829
318.6	-44.8914
318.8	-44.9219
319	-45.227
319.2	-44.8303
319.4	-45.2881
319.6	-44.9829
319.8	-45.4102
320	-45.3491
320.2	-45.0745
320.4	-45.166
320.6	-45.4102
320.8	-45.7153
321	-45.3796
321.2	-45.8374
321.4	-45.8679
321.6	-45.8679
321.8	-45.7458
322	-45.8679
322.2	-45.8069
322.4	-45.6238
322.6	-46.051
322.8	-46.0815
323	-46.2036
323.2	-46.2036
323.4	-46.0815
323.6	-46.0815
323.8	-46.0205
324	-45.929
324.2	-45.8069
324.4	-45.99
324.6	-46.0205
324.8	-46.0815
325	-46.2341
325.2	-46.3562
325.4	-46.4478
325.6	-46.4783
325.8	-46.1731
326	-46.2646
326.2	-46.3257
326.4	-46.3867
326.6	-46.1121
326.8	-46.4172
327	-46.4783
327.2	-45.9595
327.4	-46.4172
327.6	-46.3562
327.8	-46.3257
328	-46.3257
328.2	-46.3562
328.4	-46.5393
328.6	-46.3867
328.8	-46.3867
329	-46.3562
329.2	-45.8679
329.4	-46.2952
329.6	-46.2036
329.8	-46.3562
330	-46.3257
330.2	-46.3257
330.4	-45.8984
330.6	-46.3257
330.8	-46.3257
331	-46.2341
331.2	-46.0205
331.4	-45.8374
331.6	-45.99
331.8	-46.0815
332	-46.2952
332.2	-46.2036
332.4	-46.2341
332.6	-46.2646
332.8	-46.1121
333	-46.0205
333.2	-45.8069
333.4	-45.7153
333.6	-45.6848
333.8	-45.8984
334	-45.99
334.2	-46.051
334.4	-45.7458
334.6	-45.7764
334.8	-45.9595
335	-46.051
335.2	-45.5322
335.4	-45.8679
335.6	-45.7458
335.8	-45.7458
336	-45.8679
336.2	-45.5322
336.4	-45.7458
336.6	-45.4712
336.8	-45.7458
337	-45.7153
337.2	-45.6238
337.4	-45.1355
337.6	-45.6238
337.8	-45.0745
338	-45.5322
338.2	-45.2881
338.4	-45.4712
338.6	-45.105
338.8	-45.5322
339	-45.6543
339.2	-45.5933
339.4	-45.5627
339.6	-45.5017
339.8	-45.6543
340	-45.7458
340.2	-45.8374
340.4	-45.8069
340.6	-45.8374
340.8	-45.7764
341	-45.6848
341.2	-45.7153
341.4	-45.5933
341.6	-45.227
341.8	-45.105
342	-44.9524
342.2	-45.1355
342.4	-45.1355
342.6	-45.1355
342.8	-44.8303
343	-44.9219
343.2	-45.105
343.4	-44.9219
343.6	-44.9524
343.8	-45.105
344	-44.6472
344.2	-45.1965
344.4	-44.8914
344.6	-45.1355
344.8	-44.8303
345	-44.9524
345.2	-44.9219
345.4	-44.8914
345.6	-44.7998
345.8	-44.6777
346	-44.9829
346.2	-44.7998
346.4	-44.9219
346.6	-45.0745
346.8	-45.0745
347	-44.6777
347.2	-44.9219
347.4	-44.7388
347.6	-44.6472
347.8	-44.4336
348	-44.4031
348.2	-44.4641
348.4	-44.5251
348.6	-44.6167
348.8	-44.6167
349	-44.6472
349.2	-44.6777
349.4	-44.7082
349.6	-44.7693
349.8	-44.6777
350	-44.6472
350.2	-44.7388
350.4	-44.8608
350.6	-45.0745
350.8	-45.2881
351	-45.105
351.2	-44.7998
351.4	-45.0745
351.6	-45.227
351.8	-44.7998
352	-45.105
352.2	-45.0745
352.4	-44.9219
352.6	-45.1355
352.8	-44.7388
353	-45.105
353.2	-44.7693
353.4	-44.9829
353.6	-45.1355
353.8	-45.227
354	-45.0439
354.2	-45.0439
354.4	-45.0745
354.6	-45.1355
354.8	-45.166
355	-45.2576
355.2	-45.2576
355.4	-44.8914
355.6	-45.2576
355.8	-45.2881
356	-45.2576
356.2	-45.2881
356.4	-45.0745
356.6	-45.1355
356.8	-45.3796
357	-45.5017
357.2	-45.5933
357.4	-45.6238
357.6	-45.6848
357.8	-45.6543
358	-45.5017
358.2	-45.4407
358.4	-45.6848
358.6	-45.8679
358.8	-45.929
359	-46.0815
359.2	-45.8984
359.4	-45.8069
359.6	-46.051
359.8	-46.1426
360	-45.7458
360.2	-46.2036
360.4	-46.051
360.6	-46.2341
360.8	-46.5088
361	-46.2646
361.2	-46.5698
361.4	-46.2341
361.6	-46.6003
361.8	-46.3867
362	-46.5393
362.2	-46.9665
362.4	-47.0276
362.6	-46.6919
362.8	-47.0886
363	-46.875
363.2	-46.9055
363.4	-46.7529
363.6	-47.0276
363.8	-46.8445
364	-46.6003
364.2	-46.9665
364.4	-47.0276
364.6	-47.0886
364.8	-46.9055
365	-46.8445
365.2	-46.7224
365.4	-46.6003
365.6	-46.5088
365.8	-46.5393
366	-46.5088
366.2	-46.4783
366.4	-46.4172
366.6	-46.5393
366.8	-46.6614
367	-46.6309
367.2	-46.3867
367.4	-46.1426
367.6	-46.4783
367.8	-46.7529
368	-46.6309
368.2	-46.6003
368.4	-46.8445
368.6	-46.7834
368.8	-46.6614
369	-46.9055
369.2	-46.4478
369.4	-46.6614
369.6	-46.3257
369.8	-46.6614
370	-46.2341
370.2	-46.2952
370.4	-46.1731
370.6	-46.1731
370.8	-46.2952
371	-45.8374
371.2	-46.2952
371.4	-45.99
371.6	-46.2341
371.8	-45.9595
372	-46.2952
372.2	-46.1731
372.4	-45.8374
372.6	-45.8069
372.8	-46.0815
373	-46.1731
373.2	-46.0205
373.4	-45.9595
373.6	-45.99
373.8	-45.99
374	-45.99
374.2	-46.051
374.4	-45.99
374.6	-45.8984
374.8	-45.99
375	-45.8984
375.2	-45.6848
375.4	-45.2881
375.6	-45.5017
375.8	-45.7764
376	-45.8679
376.2	-45.6238
376.4	-45.6543
376.6	-45.8984
376.8	-45.7458
377	-45.7153
377.2	-45.99
377.4	-45.4712
377.6	-45.7764
377.8	-45.5627
378	-45.8984
378.2	-45.6543
378.4	-45.929
378.6	-46.051
378.8	-46.1731
379	-45.7458
379.2	-46.3257
379.4	-45.8984
379.6	-46.3867
379.8	-46.1426
380	-46.3562
380.2	-46.2341
380.4	-46.3257
380.6	-46.3257
380.8	-46.1426
381	-46.051
381.2	-45.8984
381.4	-46.0815
381.6	-46.1121
381.8	-46.2036
382	-46.2036
382.2	-46.2646
382.4	-46.2341
382.6	-46.2646
382.8	-46.2646
383	-46.1731
383.2	-46.0815
383.4	-45.8984
383.6	-45.8069
383.8	-46.1426
384	-46.3867
384.2	-46.4478
384.4	-46.1426
384.6	-46.2952
384.8	-46.6003
385	-46.4478
385.2	-46.3257
385.4	-46.5698
385.6	-46.051
385.8	-46.5393
386	-46.3562
386.2	-46.6309
386.4	-46.6614
386.6	-46.6309
386.8	-46.8445
387	-46.875
387.2	-46.814
387.4	-46.3257
387.6	-46.6919
387.8	-46.4783
388	-46.814
388.2	-46.3257
388.4	-46.8445
388.6	-46.6003
388.8	-46.3257
389	-46.7224
389.2	-46.7834
389.4	-46.7529
389.6	-46.6003
389.8	-46.4783
390	-46.5088
390.2	-46.6003
390.4	-46.6003
390.6	-46.5088
390.8	-46.6614
391	-46.5698
391.2	-46.4783
391.4	-46.5088
391.6	-46.6614
391.8	-46.814
392	-46.9055
392.2	-46.936
392.4	-46.8445
392.6	-46.5088
392.8	-46.7529
393	-46.8445
393.2	-46.5698
393.4	-46.7224
393.6	-46.8445
393.8	-46.4172
394	-46.9055
394.2	-46.6309
394.4	-46.814
394.6	-46.6309
394.8	-46.7834
395	-46.7224
395.2	-46.2952
395.4	-46.5088
395.6	-46.6614
395.8	-46.4172
396	-46.3867
396.2	-46.1731
396.4	-46.2952
396.6	-45.9595
396.8	-46.2036
397	-46.2036
397.2	-45.929
397.4	-45.8984
397.6	-46.2952
397.8	-46.3257
398	-46.3257
398.2	-46.2952
398.4	-46.2952
398.6	-46.1121
398.8	-46.051
399	-46.1121
399.2	-46.1121
399.4	-46.1121
399.6	-46.051
399.8	-46.2341
[truncated: 63,536 more rows]
