# Supplementary material for: Intrinsic mechanical sensitivity of mammalian auditory neurons as a contributor to sound-driven neural activity
Source: eLife. 2022 Mar 10;11:e74948. doi: 10.7554/eLife.74948 (PMC8942473; doi:10.7554/eLife.74948)
Supplement: Figure 1—figure supplement 2—source data 1. [file elife-74948-fig1-figsupp2-data1.xls]

## Sheet: Fig 1 S2a
Time	MP mV)	MP (mV)								-38.147
0.4	-52.9175	-57.1136								-37.9944						Varied responses to combined mechanical and electrical stimulation of SGNs.
0.5	-52.9022	-57.1136								-37.8265
0.6	-52.9633	-57.1289								-37.6739
0.7	-52.9785	-57.0984								-37.4756
0.8	-52.9785	-57.0984								-37.2772
0.9	-52.9633	-57.1136								-37.1094
1	-52.9785	-57.0679								-36.9263						Figure 1- figure supplement 2
1.1	-52.9633	-57.0984								-36.7279						Varied responses to combined mechanical and electrical stimulation of SGNs.
1.2	-53.009	-57.0984								-36.5753
1.3	-53.009	-57.1136								-36.3617
1.4	-53.0243	-57.1442								-36.1328
1.5	-52.9633	-57.2052								-35.8734
1.6	-52.9633	-57.1442								-35.6293
1.7	-52.9633	-57.1899								-35.3699
1.8	-52.9785	-57.1899								-35.1105
1.9	-52.9785	-57.2052								-34.8206
2	-52.9938	-57.1747								-34.4696
2.1	-53.0243	-57.2357								-34.1492
2.2	-52.9785	-57.2357								-33.7372
2.3	-53.009	-57.1899								-33.3099
2.4	-53.0395	-57.251								-32.8369
2.5	-53.0395	-57.2815								-32.3791
2.6	-53.0395	-57.2815								-31.8909
2.7	-53.009	-57.2967								-31.4026
2.8	-53.0243	-57.2815								-30.838
2.9	-53.009	-57.2967								-30.2124
3	-52.9938	-57.312								-29.5105
3.1	-53.009	-57.312								-28.6713
3.2	-53.009	-57.251								-27.7252
3.3	-53.009	-57.251								-26.535
3.4	-52.9633	-57.2815								-25.116
3.5	-52.9633	-57.251								-23.3459
3.6	-52.948	-57.251								-21.1945
3.7	-52.9633	-57.2815								-18.5547
3.8	-52.9633	-57.251								-15.3809
3.9	-52.9327	-57.251								-11.7035
4	-52.948	-57.2815								-7.79724
4.1	-52.948	-57.2357								-3.98254
4.2	-52.948	-57.2357								-0.579834
4.3	-52.9175	-57.2357								2.09045
4.4	-52.9175	-57.251								3.92151
4.5	-52.948	-57.2357								4.91333
4.6	-52.9175	-57.251								5.11169
4.7	-52.9022	-57.251								4.53186
4.8	-52.9327	-57.251								3.31116
4.9	-52.887	-57.2815								1.52588
5	-52.887	-57.2662								-0.701904
5.1	-52.9022	-57.2815								-3.38745
5.2	-52.8564	-57.2967								-6.42395
5.3	-52.9022	-57.312								-9.65881
5.4	-52.8717	-57.2967								-13.031
5.5	-52.887	-57.3273								-16.4795
5.6	-52.8564	-57.312								-19.8212
5.7	-52.8564	-57.312								-23.1018
5.8	-52.8259	-57.312								-26.123
5.9	-52.8259	-57.3425								-28.9459
6	-52.8107	-57.312								-31.6162
6.1	-52.7954	-57.3273								-34.0118
6.2	-52.8107	-57.3273								-36.2091
6.3	-52.8259	-57.3578								-38.147
6.4	-52.7649	-57.2815								-39.9017
6.5	-52.7191	-57.3273								-41.4276
6.6	-52.7344	-57.2815								-42.8009
6.7	-52.7344	-57.2967								-43.9911
6.8	-52.6886	-57.2967								-45.0287
6.9	-52.6886	-57.2967								-45.9595
7	-52.6581	-57.251								-46.7377
7.1	-52.6886	-57.2662								-47.4548
7.2	-52.6733	-57.251								-48.0652
7.3	-52.6581	-57.2357								-48.6298
7.4	-52.6581	-57.2357								-49.057
7.5	-52.6581	-57.2205								-49.4385
7.6	-52.6428	-57.2052								-49.7284
7.7	-52.6123	-57.1899								-50.0488
7.8	-52.6276	-57.2357								-50.2319
7.9	-52.6276	-57.2052								-50.4456
8	-52.6123	-57.1899								-50.6287
8.1	-52.6276	-57.1899								-50.705
8.2	-52.6428	-57.1442								-50.8575
8.3	-52.6276	-57.0984								-50.9338
8.4	-52.6123	-57.1289								-50.9949
8.5	-52.6276	-57.1442								-51.0864
8.6	-52.6123	-57.0984								-51.0864
8.7	-52.597	-57.1289								-51.1169
8.8	-52.6123	-57.1289								-51.1322
8.9	-52.597	-57.1289								-51.1017
9	-52.536	-57.1289								-51.1169
9.1	-52.5513	-57.1136								-51.1322
9.2	-52.5513	-57.1594								-51.0864
9.3	-52.5207	-57.1289								-51.0712
9.4	-52.5513	-57.1136								-51.0406
9.5	-52.536	-57.0984								-50.9644
9.6	-52.5665	-57.1289								-50.9338
9.7	-52.4902	-57.1442								-50.8728
9.8	-52.4902	-57.1747								-50.827
9.9	-52.475	-57.2205								-50.766
10	-52.4902	-57.1899								-50.7202
10.1	-52.5055	-57.2357								-50.6439
10.2	-52.475	-57.2205								-50.5676
10.3	-52.4902	-57.251								-50.5371
10.4	-52.475	-57.2815								-50.4456
10.5	-52.4902	-57.2662								-50.3693
10.6	-52.475	-57.2357								-50.293
10.7	-52.475	-57.2357								-50.2167
10.8	-52.4139	-57.251								-50.1709
10.9	-52.3834	-57.2357								-50.1099
11	-52.4139	-57.2052								-50.0183
11.1	-52.3682	-57.251								-49.9268
11.2	-52.3834	-57.2357								-49.8657
11.3	-52.3529	-57.2052								-49.7589
11.4	-52.3834	-57.2205								-49.6979
11.5	-52.3224	-57.2662								-49.6063
11.6	-52.3071	-57.2357								-49.5911
11.7	-52.3376	-57.2662								-49.4842
11.8	-52.2766	-57.312								-49.3774
11.9	-52.3071	-57.312								-49.2859
12	-52.3071	-57.2967								-49.2248
12.1	-52.2613	-57.3578								-49.1333
12.2	-52.2461	-57.3425								-49.057
12.3	-52.2003	-57.3425								-48.9807
12.4	-52.2156	-57.2967								-48.8586
12.5	-52.1851	-57.2967								-48.7823
12.6	-52.1698	-57.312								-48.6908
12.7	-52.1698	-57.2662								-48.5992
12.8	-52.124	-57.2967								-48.584
12.9	-52.124	-57.2815								-48.4772
13	-52.1088	-57.3273								-48.4009
13.1	-52.124	-57.2967								-48.2941
13.2	-52.1393	-57.312								-48.2178
13.3	-52.1393	-57.3425								-48.1415
13.4	-52.124	-57.3273								-48.0347
13.5	-52.1393	-57.3273								-47.8973
13.6	-52.1393	-57.3578								-47.8668
13.7	-52.124	-57.3578								-47.7295
13.8	-52.124	-57.3425								-47.6685
13.9	-52.1088	-57.3425								-47.5922
14	-52.1088	-57.4036								-47.5464
14.1	-52.0782	-57.3883								-47.4548
14.2	-52.0477	-57.373								-47.4091
14.3	-52.063	-57.3425								-47.3175
14.4	-52.0477	-57.3425								-47.2259
14.5	-51.9714	-57.3425								-47.1497
14.6	-51.9867	-57.3883								-47.1039
14.7	-51.9562	-57.3578								-47.0428
14.8	-51.9409	-57.3273								-46.9513
14.9	-51.9562	-57.3578								-46.9055
15	-51.9257	-57.3425								-46.7834
15.1	-51.9257	-57.3425								-46.6919
15.2	-51.8799	-57.3578								-46.6156
15.3	-51.8646	-57.3578								-46.5393
15.4	-51.9104	-57.3578								-46.463
15.5	-51.9257	-57.373								-46.3562
15.6	-51.9104	-57.3883								-46.3104
15.7	-51.9104	-57.373								-46.2036
15.8	-51.9257	-57.3578								-46.1426
15.9	-51.9104	-57.3273								-46.0358
16	-51.8799	-57.2967								-45.9747
16.1	-51.8646	-57.312								-45.8832
16.2	-51.8951	-57.2967								-45.7916
16.3	-51.8799	-57.312								-45.7001
16.4	-51.8799	-57.312								-45.6085
16.5	-51.8188	-57.3425								-45.517
16.6	-51.8646	-57.3425								-45.4559
16.7	-51.8036	-57.3273								-45.4102
16.8	-51.8188	-57.312								-45.3186
16.9	-51.8036	-57.2815								-45.227
17	-51.8036	-57.2815								-45.166
17.1	-51.8036	-57.2815								-45.0897
17.2	-51.7731	-57.312								-45.0134
17.3	-51.7883	-57.3273								-44.8914
17.4	-51.7731	-57.3273								-44.8303
17.5	-51.7578	-57.2967								-44.7082
17.6	-51.7425	-57.3273								-44.5709
17.7	-51.7273	-57.3273								-44.5099
17.8	-51.7425	-57.3273								-44.4031
17.9	-51.7578	-57.3273								-44.3573
18	-51.7883	-57.3273								-44.2352
18.1	-51.7578	-57.312								-44.1437
18.2	-51.7578	-57.2967								-44.0826
18.3	-51.7578	-57.2815								-43.9911
18.4	-51.7273	-57.2815								-43.93
18.5	-51.7273	-57.2815								-43.869
18.6	-51.7425	-57.2815								-43.808
18.7	-51.7425	-57.2815								-43.7164
18.8	-51.712	-57.2205								-43.6554
18.9	-51.712	-57.2205								-43.5638
19	-51.6815	-57.2357								-43.4723
19.1	-51.6357	-57.2205								-43.3807
19.2	-51.651	-57.2357								-43.3655
19.3	-51.6357	-57.2052								-43.2434
19.4	-51.6205	-57.251								-43.1824
19.5	-51.6052	-57.2662								-43.1519
19.6	-51.6052	-57.2205								-43.045
19.7	-51.5747	-57.2662								-42.9687
19.8	-51.5594	-57.251								-42.8619
19.9	-51.5442	-57.2357								-42.7704
20	-51.5442	-57.2662								-42.6483
20.1	-51.5442	-57.2815								-42.5568
20.2	-51.5289	-57.2662								-42.4194
20.3	-51.5442	-57.2967								-42.3431
20.4	-51.4984	-57.2967								-42.2211
20.5	-51.5442	-57.312								-42.1448
20.6	-51.5289	-57.2967								-42.0227
20.7	-51.5442	-57.2815								-41.9617
20.8	-51.5137	-57.312								-41.8549
20.9	-51.5442	-57.2815								-41.7328
21	-51.5442	-57.2967								-41.6107
21.1	-51.5137	-57.2815								-41.4886
21.2	-51.4984	-57.2967								-41.3666
21.3	-51.4679	-57.2967								-41.275
21.4	-51.4679	-57.3273								-41.1224
21.5	-51.4526	-57.3273								-41.0156
21.6	-51.4374	-57.312								-40.9088
21.7	-51.4679	-57.2967								-40.7867
21.8	-51.4374	-57.2815								-40.6647
21.9	-51.4374	-57.3425								-40.5579
22	-51.4374	-57.3273								-40.4053
22.1	-51.3916	-57.3425								-40.2985
22.2	-51.3916	-57.312								-40.2069
22.3	-51.4069	-57.3273								-40.1001
22.4	-51.4221	-57.3425								-40.0085
22.5	-51.4069	-57.2815								-39.9017
22.6	-51.4069	-57.2967								-39.8254
22.7	-51.3611	-57.3578								-39.6881
22.8	-51.3763	-57.3578								-39.5813
22.9	-51.3916	-57.3425								-39.505
23	-51.4069	-57.373								-39.4287
23.1	-51.3763	-57.3578								-39.2914
23.2	-51.3458	-57.4188								-39.154
23.3	-51.3611	-57.373								-39.0167
23.4	-51.3611	-57.3883								-38.8336
23.5	-51.3458	-57.3425								-38.6505
23.6	-51.3306	-57.3578								-38.4827
23.7	-51.3306	-57.3273								-38.3301
23.8	-51.3306	-57.3425								-38.147
23.9	-51.3	-57.3578								-37.9639
24	-51.239	-57.3425								-37.8418
24.1	-51.239	-57.3425								-37.6129
24.2	-51.2085	-57.312								-37.3688
24.3	-51.1932	-57.312								-37.1551
24.4	-51.1475	-57.2662								-36.9873
24.5	-51.1627	-57.2815								-36.7889
24.6	-51.1169	-57.2662								-36.6058
24.7	-51.1017	-57.251								-36.3769
24.8	-51.1322	-57.251								-36.1023
24.9	-51.1169	-57.2205								-35.8429
25	-51.1169	-57.251								-35.614
25.1	-51.1169	-57.251								-35.3546
25.2	-51.1169	-57.2357								-35.0494
25.3	-51.1017	-57.2205								-34.7748
25.4	-51.0864	-57.2357								-34.4238
25.5	-51.1017	-57.2052								-34.0729
25.6	-51.0864	-57.2357								-33.6914
25.7	-51.1017	-57.1899								-33.2947
25.8	-51.1169	-57.1747								-32.8827
25.9	-51.1627	-57.1747								-32.4249
26	-51.1322	-57.1594								-31.9366
26.1	-51.1322	-57.1899								-31.3873
26.2	-51.1627	-57.1594								-30.7159
26.3	-51.1475	-57.1594								-29.9377
26.4	-51.1322	-57.1594								-29.0833
26.5	-51.1475	-57.1442								-28.0762
26.6	-51.1475	-57.1442								-26.8097
26.7	-51.178	-57.0984								-25.3296
26.8	-51.178	-57.0984								-23.4833
26.9	-51.178	-57.1289								-21.1182
27	-51.1932	-57.0984								-18.219
27.1	-51.1627	-57.0831								-14.6942
27.2	-51.1475	-57.0679								-10.6659
27.3	-51.1627	-57.0373								-6.39343
27.4	-51.1932	-57.0679								-2.31934
27.5	-51.1627	-57.0984								1.20544
27.6	-51.1169	-57.0526								3.87573
27.7	-51.1627	-57.0984								5.59998
27.8	-51.1475	-57.0679								6.43921
27.9	-51.1322	-57.0831								6.36291
28	-51.1322	-57.0679								5.58472
28.1	-51.1169	-57.0221								4.10461
28.2	-51.1627	-57.0526								2.02942
28.3	-51.1017	-57.0221								-0.62561
28.4	-51.1169	-57.0221								-3.54004
28.5	-51.1322	-57.0221								-6.82068
28.6	-51.1322	-57.0221								-10.2539
28.7	-51.178	-57.0221								-13.8092
28.8	-51.1169	-57.0679								-17.3035
28.9	-51.1627	-57.0526								-20.813
29	-51.1627	-57.0679								-24.1699
29.1	-51.1627	-57.0526								-27.298
29.2	-51.1475	-57.0526								-30.1819
29.3	-51.178	-57.0373								-32.8369
29.4	-51.1169	-57.0831								-35.3241
29.5	-51.0864	-57.0526								-37.5214
29.6	-51.0864	-57.0984								-39.505
29.7	-51.0864	-57.1136								-41.214
29.8	-51.0864	-57.1289								-42.7399
29.9	-51.0406	-57.1289								-44.0674
30	-51.0864	-57.1289								-45.2728
30.1	-51.0864	-57.1594								-46.2341
30.2	-51.1017	-57.1747								-47.1344
30.3	-51.1322	-57.1594								-47.8516
30.4	-51.1322	-57.1747								-48.4619
30.5	-51.1627	-57.1442								-48.9502
30.6	-51.1322	-57.1747								-49.4232
30.7	-51.1169	-57.2052								-49.8199
30.8	-51.1169	-57.2052								-50.1404
30.9	-51.1475	-57.1899								-50.3998
31	-51.1475	-57.1594								-50.5981
31.1	-51.178	-57.1747								-50.7507
31.2	-51.1475	-57.2205								-50.9186
31.3	-51.2238	-57.1899								-51.0712
31.4	-51.178	-57.2052								-51.1627
31.5	-51.239	-57.2052								-51.239
31.6	-51.2238	-57.1747								-51.3153
31.7	-51.2695	-57.1899								-51.3306
31.8	-51.2238	-57.2052								-51.3763
31.9	-51.2085	-57.2052								-51.3611
32	-51.1932	-57.2357								-51.4069
32.1	-51.1932	-57.2205								-51.4221
32.2	-51.2238	-57.2357								-51.4069
32.3	-51.239	-57.2205								-51.3916
32.4	-51.2238	-57.2205								-51.4069
32.5	-51.2085	-57.2052								-51.3306
32.6	-51.1932	-57.2815								-51.3306
32.7	-51.1932	-57.2052								-51.2543
32.8	-51.1932	-57.251								-51.1932
32.9	-51.1932	-57.2357								-51.1017
33	-51.1932	-57.2662								-51.0254
33.1	-51.1627	-57.2815								-50.9796
33.2	-51.2085	-57.2815								-50.8728
33.3	-51.2543	-57.2967								-50.8118
33.4	-51.2543	-57.2967								-50.705
33.5	-51.2238	-57.2815								-50.6439
33.6	-51.2543	-57.3273								-50.5371
33.7	-51.2543	-57.312								-50.4608
33.8	-51.2695	-57.2967								-50.415
33.9	-51.239	-57.312								-50.3387
34	-51.2238	-57.3273								-50.2624
34.1	-51.2695	-57.2662								-50.1709
34.2	-51.3	-57.2967								-50.0488
34.3	-51.3	-57.2662								-49.9878
34.4	-51.3306	-57.2967								-49.8657
34.5	-51.3153	-57.3273								-49.8199
34.6	-51.3306	-57.312								-49.6674
34.7	-51.3306	-57.312								-49.5758
34.8	-51.3	-57.312								-49.5453
34.9	-51.2695	-57.3273								-49.4232
35	-51.2695	-57.2815								-49.3317
35.1	-51.3153	-57.312								-49.2706
35.2	-51.3	-57.3578								-49.1638
35.3	-51.2848	-57.3425								-49.0875
35.4	-51.3458	-57.2815								-48.9655
35.5	-51.3153	-57.2815								-48.9044
35.6	-51.3611	-57.2967								-48.8129
35.7	-51.3458	-57.312								-48.7518
35.8	-51.3153	-57.3273								-48.6755
35.9	-51.3763	-57.3273								-48.5535
36	-51.3763	-57.312								-48.4467
36.1	-51.3763	-57.3578								-48.4009
36.2	-51.4069	-57.3425								-48.2941
36.3	-51.3916	-57.3273								-48.2178
36.4	-51.3458	-57.312								-48.1567
36.5	-51.3763	-57.312								-48.0194
36.6	-51.3611	-57.3425								-47.9431
36.7	-51.3611	-57.3578								-47.8516
36.8	-51.3458	-57.3425								-47.76
36.9	-51.3611	-57.3425								-47.699
37	-51.3306	-57.3273								-47.6227
37.1	-51.3763	-57.3273								-47.5464
37.2	-51.3763	-57.3273								-47.4396
37.3	-51.4069	-57.373								-47.348
37.4	-51.4221	-57.3425								-47.2565
37.5	-51.4526	-57.373								-47.1802
37.6	-51.4526	-57.4188								-47.1191
37.7	-51.4526	-57.373								-46.9818
37.8	-51.4374	-57.3578								-46.9208
37.9	-51.4526	-57.3578								-46.7987
38	-51.4832	-57.3578								-46.7224
38.1	-51.4984	-57.3425								-46.6919
38.2	-51.4832	-57.3273								-46.5851
38.3	-51.5289	-57.373								-46.4783
38.4	-51.5137	-57.3425								-46.3562
38.5	-51.5289	-57.3883								-46.2494
38.6	-51.5594	-57.3578								-46.1731
38.7	-51.5594	-57.3578								-46.051
38.8	-51.5442	-57.3883								-45.9747
38.9	-51.5442	-57.3883								-45.9137
39	-51.5442	-57.373								-45.8221
39.1	-51.5137	-57.3425								-45.7458
39.2	-51.5594	-57.373								-45.6696
39.3	-51.4984	-57.3273								-45.578
39.4	-51.4832	-57.312								-45.4254
39.5	-51.4832	-57.2967								-45.2728
39.6	-51.5137	-57.3273								-45.2576
39.7	-51.5137	-57.312								-45.0897
39.8	-51.4832	-57.2967								-45.0287
39.9	-51.4832	-57.2662								-44.8914
40	-51.4221	-57.2967								-44.8303
40.1	-51.4679	-57.2662								-44.7082
40.2	-51.4526	-57.2967								-44.5557
40.3	-51.4984	-57.2815								-44.4183
40.4	-51.4984	-57.2662								-44.2963
40.5	-51.4526	-57.2662								-44.1742
40.6	-51.4679	-57.2662								-44.0979
40.7	-51.4832	-57.2662								-44.0216
40.8	-51.4984	-57.2357								-43.9148
40.9	-51.4526	-57.2662								-43.8385
41	-51.4526	-57.251								-43.7012
41.1	-51.4221	-57.251								-43.6401
41.2	-51.4526	-57.2662								-43.5181
41.3	-51.4221	-57.251								-43.4113
41.4	-51.4069	-57.2662								-43.2587
41.5	-51.4374	-57.2815								-43.1824
41.6	-51.3763	-57.312								-42.9993
41.7	-51.3916	-57.251								-42.8925
41.8	-51.3306	-57.2815								-42.8009
41.9	-51.3306	-57.2357								-42.7399
42	-51.3763	-57.2052								-42.6636
42.1	-51.3458	-57.251								-42.511
42.2	-51.3306	-57.251								-42.3737
42.3	-51.3763	-57.2052								-42.2516
42.4	-51.3458	-57.251								-42.16
42.5	-51.3458	-57.2662								-42.0532
42.6	-51.3611	-57.2662								-41.9769
42.7	-51.4069	-57.2662								-41.8854
42.8	-51.4374	-57.2815								-41.7786
42.9	-51.4069	-57.251								-41.687
43	-51.3916	-57.251								-41.5802
43.1	-51.3916	-57.2662								-41.4886
43.2	-51.4069	-57.2815								-41.3971
43.3	-51.4374	-57.2815								-41.3055
43.4	-51.4984	-57.2662								-41.1987
43.5	-51.4526	-57.2967								-41.0919
43.6	-51.5137	-57.2815								-40.9546
43.7	-51.4374	-57.251								-40.9088
43.8	-51.4679	-57.2815								-40.7715
43.9	-51.4526	-57.2662								-40.6799
44	-51.4832	-57.2205								-40.5884
44.1	-51.5289	-57.2205								-40.4663
44.2	-51.4984	-57.2357								-40.3442
44.3	-51.5289	-57.2662								-40.2679
44.4	-51.5594	-57.2357								-40.1459
44.5	-51.5747	-57.251								-40.0238
44.6	-51.59	-57.2815								-39.8712
44.7	-51.5442	-57.2815								-39.7186
44.8	-51.5594	-57.2357								-39.5355
44.9	-51.5747	-57.2662								-39.4134
45	-51.5747	-57.251								-39.3066
45.1	-51.5289	-57.2357								-39.1693
45.2	-51.5747	-57.251								-39.0625
45.3	-51.5442	-57.251								-38.8946
45.4	-51.5594	-57.2967								-38.7573
45.5	-51.5747	-57.251								-38.559
45.6	-51.5442	-57.2662								-38.3911
45.7	-51.5442	-57.2357								-38.1927
45.8	-51.5442	-57.251								-38.0249
45.9	-51.5442	-57.251								-37.8265
46	-51.5289	-57.2815								-37.5977
46.1	-51.5747	-57.2815								-37.4298
46.2	-51.5442	-57.251								-37.2314
46.3	-51.59	-57.2815								-37.0026
46.4	-51.6052	-57.251								-36.8195
46.5	-51.59	-57.2815								-36.6211
46.6	-51.6052	-57.2662								-36.4075
46.7	-51.59	-57.2662								-36.1786
46.8	-51.6357	-57.2815								-35.9497
46.9	-51.6205	-57.312								-35.7056
47	-51.6815	-57.2815								-35.4309
47.1	-51.6815	-57.2815								-35.1257
47.2	-51.6663	-57.312								-34.9121
47.3	-51.6815	-57.2815								-34.6069
47.4	-51.6815	-57.312								-34.3323
47.5	-51.6968	-57.2967								-33.9813
47.6	-51.6815	-57.3273								-33.6456
47.7	-51.6815	-57.2967								-33.3405
47.8	-51.6663	-57.2815								-32.8979
47.9	-51.6815	-57.2967								-32.4554
48	-51.6815	-57.2967								-32.0282
48.1	-51.7425	-57.2662								-31.4636
48.2	-51.7273	-57.2815								-30.9143
48.3	-51.7425	-57.2967								-30.1819
48.4	-51.7731	-57.2967								-29.4647
48.5	-51.7578	-57.2967								-28.5339
48.6	-51.7731	-57.3273								-27.4811
48.7	-51.7578	-57.3425								-26.2756
48.8	-51.7731	-57.3425								-24.7803
48.9	-51.7731	-57.373								-22.9187
49	-51.7731	-57.3578								-20.5994
49.1	-51.7731	-57.4036								-17.8833
49.2	-51.7883	-57.3578								-14.5874
49.3	-51.8188	-57.3425								-10.8337
49.4	-51.8341	-57.373								-6.86645
49.5	-51.8188	-57.3273								-3.09753
49.6	-51.8494	-57.3425								0.198364
49.7	-51.8799	-57.373								2.73132
49.8	-51.8951	-57.3578								4.56238
49.9	-51.8799	-57.3425								5.43213
50	-51.8646	-57.3425								5.49316
50.1	-51.9104	-57.3425								4.80652
50.2	-51.9104	-57.3425								3.50952
50.3	-51.8799	-57.3578								1.57166
50.4	-51.8799	-57.3578								-0.854492
50.5	-51.8494	-57.3578								-3.69263
50.6	-51.8799	-57.373								-6.88171
50.7	-51.8799	-57.3273								-10.2234
50.8	-51.8951	-57.2967								-13.6719
50.9	-51.8799	-57.3578								-17.1204
51	-51.8799	-57.3273								-20.4773
51.1	-51.9257	-57.3425								-23.7579
51.2	-51.9104	-57.3425								-26.8555
51.3	-51.9257	-57.3578								-29.7089
51.4	-51.9562	-57.3273								-32.4249
51.5	-51.9409	-57.312								-34.8358
51.6	-51.9714	-57.3578								-37.0636
51.7	-51.9409	-57.3578								-39.0472
51.8	-51.9257	-57.3883								-40.8478
51.9	-51.9562	-57.373								-42.3889
52	-51.9562	-57.3883								-43.7164
52.1	-51.9409	-57.3883								-44.8914
52.2	-51.9562	-57.4036								-45.9137
52.3	-51.9562	-57.4036								-46.7834
52.4	-51.9257	-57.4036								-47.5922
52.5	-51.9714	-57.4036								-48.2483
52.6	-51.9562	-57.3883								-48.8281
52.7	-51.9409	-57.373								-49.3317
52.8	-51.9257	-57.373								-49.7131
52.9	-51.9104	-57.4036								-50.0336
53	-51.9104	-57.4036								-50.3998
53.1	-51.8951	-57.3883								-50.6134
53.2	-51.8951	-57.4188								-50.8118
53.3	-51.9257	-57.4036								-51.0406
53.4	-51.8799	-57.4036								-51.1627
53.5	-51.8951	-57.4341								-51.3
53.6	-51.8799	-57.3578								-51.3916
53.7	-51.8494	-57.3883								-51.4679
53.8	-51.8799	-57.373								-51.5137
53.9	-51.8951	-57.3883								-51.5289
54	-51.8951	-57.373								-51.6052
54.1	-51.8951	-57.373								-51.59
54.2	-51.8799	-57.4493								-51.6052
54.3	-51.8646	-57.4188								-51.6052
54.4	-51.8951	-57.4188								-51.5442
54.5	-51.8799	-57.4341								-51.5442
54.6	-51.8646	-57.3883								-51.4984
54.7	-51.8799	-57.4188								-51.4221
54.8	-51.8799	-57.4188								-51.4069
54.9	-51.8646	-57.4188								-51.3611
55	-51.8646	-57.3883								-51.3153
55.1	-51.8494	-57.373								-51.239
55.2	-51.8341	-57.3578								-51.1475
55.3	-51.8188	-57.3883								-51.0864
55.4	-51.8188	-57.3883								-51.0101
55.5	-51.8036	-57.4036								-50.9338
55.6	-51.8341	-57.373								-50.8728
55.7	-51.8341	-57.373								-50.827
55.8	-51.8494	-57.373								-50.7202
55.9	-51.8341	-57.3578								-50.6134
56	-51.8494	-57.3883								-50.5981
56.1	-51.8341	-57.3883								-50.5371
56.2	-51.8341	-57.3578								-50.415
56.3	-51.8341	-57.373								-50.3082
56.4	-51.8188	-57.3273								-50.2319
56.5	-51.8188	-57.3578								-50.1251
56.6	-51.8036	-57.3883								-50.0488
56.7	-51.7883	-57.3578								-49.942
56.8	-51.7731	-57.3273								-49.9268
56.9	-51.7425	-57.3425								-49.8657
57	-51.7273	-57.312								-49.7742
57.1	-51.7425	-57.3425								-49.6826
57.2	-51.712	-57.3273								-49.5911
57.3	-51.7425	-57.3273								-49.5148
57.4	-51.712	-57.312								-49.4385
57.5	-51.6968	-57.3425								-49.3774
57.6	-51.6663	-57.2815								-49.2859
57.7	-51.6205	-57.312								-49.2248
57.8	-51.6663	-57.3578								-49.1333
57.9	-51.6052	-57.3273								-49.0417
58	-51.6052	-57.3883								-48.9502
58.1	-51.59	-57.3578								-48.8892
58.2	-51.6052	-57.3273								-48.8129
58.3	-51.59	-57.312								-48.7213
58.4	-51.5289	-57.3425								-48.645
58.5	-51.5137	-57.3578								-48.584
58.6	-51.5289	-57.3273								-48.4772
58.7	-51.5137	-57.312								-48.3704
58.8	-51.4984	-57.3273								-48.3246
58.9	-51.4984	-57.2815								-48.2178
59	-51.4984	-57.3273								-48.1262
59.1	-51.4984	-57.3578								-48.0499
59.2	-51.4679	-57.3273								-47.9584
59.3	-51.4526	-57.2967								-47.8973
59.4	-51.4679	-57.3425								-47.8363
59.5	-51.4526	-57.3273								-47.7295
59.6	-51.4526	-57.373								-47.6837
59.7	-51.4374	-57.3425								-47.5769
59.8	-51.4526	-57.373								-47.5159
59.9	-51.4374	-57.3578								-47.5006
60	-51.4374	-57.3578								-47.3785
60.1	-51.4374	-57.3425								-47.3175
60.2	-51.4069	-57.3425								-47.2259
60.3	-51.4069	-57.3425								-47.1344
60.4	-51.3916	-57.3578								-47.0734
60.5	-51.3611	-57.3578								-46.9818
60.6	-51.3763	-57.4036								-46.9208
60.7	-51.3611	-57.3883								-46.8445
60.8	-51.3306	-57.373								-46.7377
60.9	-51.3306	-57.4036								-46.6919
61	-51.3153	-57.3883								-46.6003
61.1	-51.2695	-57.4036								-46.5546
61.2	-51.2848	-57.3883								-46.4172
61.3	-51.2848	-57.3425								-46.3715
61.4	-51.2543	-57.3425								-46.2952
61.5	-51.2848	-57.3883								-46.1731
61.6	-51.2543	-57.3425								-46.0968
61.7	-51.2543	-57.3578								-46.0358
61.8	-51.2695	-57.3425								-45.9747
61.9	-51.2543	-57.3578								-45.8832
62	-51.2543	-57.373								-45.7916
62.1	-51.2543	-57.4036								-45.7153
62.2	-51.2848	-57.373								-45.639
62.3	-51.239	-57.373								-45.578
62.4	-51.2543	-57.3883								-45.4712
62.5	-51.239	-57.373								-45.3949
62.6	-51.1932	-57.4188								-45.3186
62.7	-51.2543	-57.4036								-45.2118
62.8	-51.1932	-57.4188								-45.1813
62.9	-51.178	-57.4036								-45.0439
63	-51.2085	-57.4036								-45.0134
63.1	-51.1932	-57.3273								-44.9219
63.2	-51.2085	-57.3578								-44.7845
63.3	-51.178	-57.373								-44.7082
63.4	-51.178	-57.3578								-44.6167
63.5	-51.178	-57.3425								-44.4946
63.6	-51.1932	-57.3273								-44.4794
63.7	-51.178	-57.2967								-44.4031
63.8	-51.1475	-57.2967								-44.2963
63.9	-51.178	-57.2662								-44.2352
64	-51.178	-57.2967								-44.1589
64.1	-51.178	-57.2967								-44.0674
64.2	-51.178	-57.251								-44.0216
64.3	-51.1627	-57.251								-43.9606
64.4	-51.1932	-57.251								-43.8995
64.5	-51.2238	-57.2205								-43.808
64.6	-51.1627	-57.2052								-43.7317
64.7	-51.1627	-57.1899								-43.6707
64.8	-51.2085	-57.1899								-43.5638
64.9	-51.2085	-57.1747								-43.457
65	-51.1322	-57.1594								-43.4113
65.1	-51.1932	-57.1747								-43.2587
65.2	-51.1475	-57.1289								-43.1976
65.3	-51.1627	-57.1442								-43.1061
65.4	-51.1475	-57.1594								-42.9993
65.5	-51.1475	-57.1442								-42.9382
65.6	-51.1475	-57.1136								-42.8162
65.7	-51.1169	-57.1442								-42.7246
65.8	-51.0864	-57.1136								-42.6025
65.9	-51.1322	-57.0831								-42.5415
66	-51.0712	-57.0984								-42.4499
66.1	-51.0712	-57.0984								-42.4042
66.2	-51.0406	-57.0526								-42.2821
66.3	-51.0712	-57.0984								-42.1905
66.4	-51.1169	-57.0679								-42.1143
66.5	-51.1169	-57.0831								-42.0532
66.6	-51.1169	-57.0679								-41.9311
66.7	-51.1475	-57.1136								-41.8243
66.8	-51.1932	-57.0679								-41.7175
66.9	-51.2085	-57.0679								-41.5955
67	-51.2238	-57.0831								-41.5039
67.1	-51.2238	-57.1136								-41.4123
67.2	-51.2695	-57.1136								-41.3208
67.3	-51.239	-57.0679								-41.2292
67.4	-51.2695	-57.0984								-41.1377
67.5	-51.2848	-57.0984								-41.0004
67.6	-51.3	-57.0679								-40.9241
67.7	-51.2848	-57.0679								-40.7867
67.8	-51.3	-57.0831								-40.7104
67.9	-51.3153	-57.0984								-40.6189
68	-51.3306	-57.1136								-40.5121
68.1	-51.3763	-57.1136								-40.451
68.2	-51.3763	-57.0831								-40.329
68.3	-51.3916	-57.1136								-40.2069
68.4	-51.3611	-57.0984								-40.1154
68.5	-51.3458	-57.1136								-40.0238
68.6	-51.3916	-57.1136								-39.9017
68.7	-51.4374	-57.1136								-39.7186
68.8	-51.4374	-57.1136								-39.5813
68.9	-51.4221	-57.0984								-39.3829
69	-51.4374	-57.1289								-39.2456
69.1	-51.4221	-57.0984								-39.1235
69.2	-51.4679	-57.0831								-38.9709
69.3	-51.4679	-57.0831								-38.7726
69.4	-51.4679	-57.0526								-38.6047
69.5	-51.4984	-57.0526								-38.4674
69.6	-51.5289	-57.0526								-38.2996
69.7	-51.5594	-57.0831								-38.1317
69.8	-51.4984	-57.0831								-37.9639
69.9	-51.5137	-57.0679								-37.8418
70	-51.5594	-57.0526								-37.6587
70.1	-51.5747	-57.0221								-37.5214
70.2	-51.5594	-57.0068								-37.2925
70.3	-51.5442	-57.0221								-37.1246
70.4	-51.5442	-57.0373								-36.9873
70.5	-51.5747	-56.9916								-36.8652
70.6	-51.6205	-57.0068								-36.6363
70.7	-51.5747	-56.9763								-36.4532
70.8	-51.6205	-57.0373								-36.2091
70.9	-51.6052	-57.0526								-35.9802
71	-51.59	-57.0221								-35.7666
71.1	-51.6357	-57.0068								-35.553
71.2	-51.59	-56.9763								-35.3394
71.3	-51.6205	-56.9611								-35.08
71.4	-51.6052	-56.9763								-34.8053
71.5	-51.6205	-56.9916								-34.5612
71.6	-51.6052	-56.9763								-34.2255
71.7	-51.6205	-57.0068								-33.8745
71.8	-51.6357	-56.9763								-33.493
71.9	-51.6663	-57.0068								-33.0811
72	-51.6205	-56.9611								-32.6385
72.1	-51.6052	-57.0068								-32.1655
72.2	-51.6052	-56.9763								-31.6772
72.3	-51.59	-56.9916								-31.1127
72.4	-51.6052	-56.9916								-30.4718
72.5	-51.5747	-56.9611								-29.8157
72.6	-51.5442	-56.9458								-29.068
72.7	-51.5442	-56.9611								-28.2288
72.8	-51.5289	-56.9458								-27.1454
72.9	-51.5289	-56.9458								-25.9857
73	-51.4984	-56.9458								-24.4598
73.1	-51.5289	-56.9611								-22.6288
73.2	-51.4679	-56.9153								-20.3857
73.3	-51.5442	-56.9611								-17.7002
73.4	-51.5289	-56.9611								-14.4653
73.5	-51.5137	-56.9611								-10.849
73.6	-51.5137	-56.9458								-7.08008
73.7	-51.5137	-56.8848								-3.46374
73.8	-51.5289	-56.9305								-0.350952
73.9	-51.5289	-56.9153								2.01416
74	-51.4832	-56.9458								3.64685
74.1	-51.5137	-56.9458								4.39453
74.2	-51.5137	-56.9305								4.34875
74.3	-51.4679	-56.9305								3.72314
74.4	-51.4526	-56.9611								2.45666
74.5	-51.4679	-56.9763								0.62561
74.6	-51.4679	-56.9611								-1.64795
74.7	-51.4069	-56.9611								-4.36401
74.8	-51.4526	-56.9763								-7.26318
74.9	-51.4526	-56.9763								-10.4675
75	-51.4526	-56.9763								-13.7024
75.1	-51.4679	-56.9611								-16.9983
75.2	-51.4221	-57.0068								-20.2484
75.3	-51.4069	-56.9763								-23.3765
75.4	-51.3763	-56.9611								-26.3824
75.5	-51.3916	-56.9916								-29.129
75.6	-51.4069	-56.9916								-31.7383
75.7	-51.3916	-56.9611								-34.1034
75.8	-51.4374	-56.9763								-36.3007
75.9	-51.3763	-56.9763								-38.2233
76	-51.4374	-56.9916								-39.978
76.1	-51.3763	-56.9916								-41.4734
76.2	-51.4526	-57.0068								-42.8772
76.3	-51.4374	-57.0068								-44.1132
76.4	-51.4069	-56.9458								-45.166
76.5	-51.3611	-56.9763								-46.0968
76.6	-51.4069	-56.9916								-46.8903
76.7	-51.4221	-56.9916								-47.6074
76.8	-51.4526	-56.9458								-48.2025
76.9	-51.4221	-56.9458								-48.7366
77	-51.4221	-56.9611								-49.1943
77.1	-51.3916	-56.9763								-49.6063
77.2	-51.4374	-56.9611								-49.9115
77.3	-51.4221	-57.0068								-50.2014
77.4	-51.4069	-57.0526								-50.4456
77.5	-51.4069	-57.0068								-50.6439
77.6	-51.4221	-56.9763								-50.7965
77.7	-51.4374	-57.0068								-50.9491
77.8	-51.4221	-57.0068								-51.0559
77.9	-51.4374	-56.9916								-51.1932
78	-51.4374	-57.0221								-51.2238
78.1	-51.4679	-57.0068								-51.3153
78.2	-51.4526	-57.0221								-51.3458
78.3	-51.4374	-57.0526								-51.3611
78.4	-51.4374	-57.0068								-51.4221
78.5	-51.4526	-57.0526								-51.4069
78.6	-51.4526	-57.0373								-51.3916
78.7	-51.4526	-57.0526								-51.3763
78.8	-51.4374	-57.0373								-51.3763
78.9	-51.4221	-57.0373								-51.3306
79	-51.3763	-57.0526								-51.3
79.1	-51.4374	-57.0679								-51.3
79.2	-51.4221	-57.0679								-51.2695
79.3	-51.3916	-57.0831								-51.2238
79.4	-51.4374	-57.0984								-51.1475
79.5	-51.4679	-57.0526								-51.0712
79.6	-51.4374	-57.0526								-51.0254
79.7	-51.4374	-57.0679								-50.9796
79.8	-51.4832	-57.0373								-50.9491
79.9	-51.5137	-57.0373								-50.8728
80	-51.4832	-57.0373								-50.8118
80.1	-51.4984	-57.0373								-50.7507
80.2	-51.4832	-57.0526								-50.6592
80.3	-51.4832	-57.0679								-50.6134
80.4	-51.5289	-57.0679								-50.5676
80.5	-51.5289	-57.0373								-50.4761
80.6	-51.4832	-57.0526								-50.3998
80.7	-51.4679	-57.0679								-50.3235
80.8	-51.4984	-57.1136								-50.2472
80.9	-51.4984	-57.1136								-50.1862
81	-51.5289	-57.0679								-50.1099
81.1	-51.5594	-57.0679								-50.0488
81.2	-51.5289	-57.0679								-49.9725
81.3	-51.5747	-57.1289								-49.9268
81.4	-51.6052	-57.0984								-49.8199
81.5	-51.5747	-57.1136								-49.7436
81.6	-51.6205	-57.1594								-49.6826
81.7	-51.5747	-57.1289								-49.6063
81.8	-51.651	-57.1747								-49.5453
81.9	-51.6052	-57.1594								-49.469
82	-51.6205	-57.1442								-49.408
82.1	-51.6357	-57.2205								-49.3469
82.2	-51.6052	-57.2357								-49.2554
82.3	-51.6052	-57.2205								-49.1638
82.4	-51.6357	-57.2205								-49.1028
82.5	-51.6052	-57.2357								-49.0112
82.6	-51.6357	-57.2357								-48.8892
82.7	-51.6357	-57.2205								-48.8892
82.8	-51.6357	-57.2357								-48.7823
82.9	-51.6205	-57.2357								-48.6908
83	-51.6357	-57.251								-48.5992
83.1	-51.6357	-57.251								-48.5077
83.2	-51.6052	-57.2662								-48.4467
83.3	-51.6052	-57.2815								-48.4009
83.4	-51.6205	-57.2815								-48.2941
83.5	-51.6205	-57.251								-48.2025
83.6	-51.651	-57.251								-48.1567
83.7	-51.6663	-57.251								-48.0652
83.8	-51.6357	-57.251								-47.9431
83.9	-51.651	-57.2662								-47.8973
84	-51.6663	-57.251								-47.8058
84.1	-51.6663	-57.2662								-47.6837
84.2	-51.6968	-57.2662								-47.6074
84.3	-51.651	-57.2357								-47.5159
84.4	-51.6663	-57.2357								-47.4548
84.5	-51.6815	-57.2815								-47.3633
84.6	-51.6663	-57.2967								-47.287
84.7	-51.6815	-57.2815								-47.2107
84.8	-51.6815	-57.2967								-47.1344
84.9	-51.712	-57.2357								-47.0428
85	-51.6815	-57.2967								-46.9208
85.1	-51.7273	-57.312								-46.8445
85.2	-51.6968	-57.312								-46.7834
85.3	-51.7425	-57.312								-46.6766
85.4	-51.7425	-57.312								-46.5851
85.5	-51.7273	-57.251								-46.4783
85.6	-51.712	-57.2815								-46.463
85.7	-51.712	-57.2815								-46.3409
85.8	-51.712	-57.2815								-46.2646
85.9	-51.6968	-57.2967								-46.1731
86	-51.7731	-57.2815								-46.1426
86.1	-51.7731	-57.2815								-46.051
86.2	-51.7883	-57.2815								-45.99
86.3	-51.7883	-57.2967								-45.9137
86.4	-51.7883	-57.3425								-45.8069
86.5	-51.8188	-57.3425								-45.7153
86.6	-51.8036	-57.3578								-45.6696
86.7	-51.8188	-57.312								-45.5627
86.8	-51.7883	-57.3883								-45.5017
86.9	-51.8188	-57.373								-45.4407
87	-51.7883	-57.4188								-45.3491
87.1	-51.7731	-57.3883								-45.3033
87.2	-51.7578	-57.4036								-45.2423
87.3	-51.7883	-57.4341								-45.166
87.4	-51.7578	-57.4188								-45.0745
87.5	-51.7273	-57.4799								-45.0134
87.6	-51.7425	-57.4493								-44.9066
87.7	-51.7578	-57.4036								-44.8608
87.8	-51.712	-57.4188								-44.7388
87.9	-51.7273	-57.4188								-44.7082
88	-51.712	-57.4036								-44.632
88.1	-51.7273	-57.4341								-44.5251
88.2	-51.7578	-57.4036								-44.4946
88.3	-51.7731	-57.4493								-44.3878
88.4	-51.7425	-57.4799								-44.3268
88.5	-51.7578	-57.4799								-44.2047
88.6	-51.8036	-57.4036								-44.1284
88.7	-51.7731	-57.4493								-44.0369
88.8	-51.7883	-57.4646								-43.9606
88.9	-51.7883	-57.4493								-43.8995
89	-51.7731	-57.4951								-43.808
89.1	-51.8188	-57.4341								-43.7622
89.2	-51.7883	-57.4341								-43.6707
89.3	-51.7883	-57.4341								-43.5486
89.4	-51.8036	-57.4188								-43.457
89.5	-51.7578	-57.4341								-43.396
89.6	-51.7425	-57.4188								-43.2739
89.7	-51.6815	-57.4188								-43.1824
89.8	-51.6968	-57.4341								-43.0756
89.9	-51.651	-57.3883								-43.0298
90	-51.6968	-57.4188								-42.9535
90.1	-51.6663	-57.4188								-42.8772
90.2	-51.6205	-57.4188								-42.8314
90.3	-51.6205	-57.4036								-42.7399
90.4	-51.6357	-57.4036								-42.6636
90.5	-51.6663	-57.3883								-42.5415
90.6	-51.651	-57.4036								-42.4805
90.7	-51.6357	-57.4188								-42.4042
90.8	-51.6357	-57.4341								-42.3279
90.9	-51.6357	-57.4341								-42.1753
91	-51.651	-57.4188								-42.0837
91.1	-51.6205	-57.4036								-41.9922
91.2	-51.6357	-57.4493								-41.9006
91.3	-51.6205	-57.4188								-41.7786
91.4	-51.6205	-57.4493								-41.6717
91.5	-51.6205	-57.4646								-41.5802
91.6	-51.6357	-57.4341								-41.5039
91.7	-51.6357	-57.4188								-41.3971
91.8	-51.651	-57.4036								-41.3208
91.9	-51.6357	-57.4188								-41.2292
92	-51.6357	-57.4036								-41.0767
92.1	-51.6205	-57.4036								-40.9698
92.2	-51.6205	-57.3578								-40.8783
92.3	-51.6205	-57.373								-40.7104
92.4	-51.6357	-57.3883								-40.5579
92.5	-51.6357	-57.3883								-40.4205
92.6	-51.6815	-57.3578								-40.2679
92.7	-51.6357	-57.4036								-40.1459
92.8	-51.6815	-57.373								-40.0085
92.9	-51.6205	-57.373								-39.8407
93	-51.6663	-57.373								-39.7186
93.1	-51.6663	-57.3578								-39.6118
93.2	-51.6663	-57.3883								-39.4745
93.3	-51.651	-57.3883								-39.3219
93.4	-51.6357	-57.3883								-39.1998
93.5	-51.651	-57.373								-39.0625
93.6	-51.6815	-57.373								-38.8946
93.7	-51.6663	-57.373								-38.7115
93.8	-51.6663	-57.4036								-38.5742
93.9	-51.651	-57.4188								-38.4216
94	-51.6663	-57.4341								-38.2233
94.1	-51.6815	-57.4493								-38.0249
94.2	-51.6663	-57.4646								-37.8571
94.3	-51.6357	-57.4036								-37.6587
94.4	-51.59	-57.4341								-37.5061
94.5	-51.6357	-57.4341								-37.3535
94.6	-51.59	-57.4799								-37.1857
94.7	-51.6357	-57.4646								-37.0178
94.8	-51.6052	-57.4799								-36.7889
94.9	-51.5747	-57.4799								-36.6058
95	-51.5747	-57.4799								-36.4075
95.1	-51.6357	-57.4799								-36.1938
95.2	-51.6052	-57.4799								-35.9497
95.3	-51.6357	-57.4493								-35.7056
95.4	-51.6052	-57.4646								-35.4767
95.5	-51.651	-57.4799								-35.1562
95.6	-51.6205	-57.4646								-34.8663
95.7	-51.6357	-57.4799								-34.5306
95.8	-51.6205	-57.4799								-34.256
95.9	-51.6357	-57.4493								-33.8898
96	-51.6663	-57.4493								-33.4778
96.1	-51.6663	-57.4188								-33.0505
96.2	-51.6663	-57.4188								-32.5928
96.3	-51.651	-57.4493								-32.1197
96.4	-51.6815	-57.4493								-31.5552
96.5	-51.6357	-57.4493								-30.899
96.6	-51.651	-57.4799								-30.1666
96.7	-51.6815	-57.4493								-29.2816
96.8	-51.6205	-57.4646								-28.244
96.9	-51.6052	-57.4951								-27.0081
97	-51.6205	-57.4951								-25.589
97.1	-51.6663	-57.4646								-23.819
97.2	-51.6968	-57.4646								-21.5759
97.3	-51.6663	-57.4341								-18.8599
97.4	-51.651	-57.4493								-15.5029
97.5	-51.6663	-57.4341								-11.7187
97.6	-51.6968	-57.4493								-7.56836
97.7	-51.6663	-57.4493								-3.57056
97.8	-51.712	-57.4493								0.0152588
97.9	-51.7273	-57.4341								2.89917
98	-51.7273	-57.4799								4.89807
98.1	-51.712	-57.4951								5.98144
98.2	-51.7731	-57.4951								6.24084
98.3	-51.7425	-57.5409								5.59998
98.4	-51.7578	-57.5104								4.22668
98.5	-51.7578	-57.5256								2.22778
98.6	-51.7731	-57.4951								-0.350952
98.7	-51.7731	-57.5561								-3.40271
98.8	-51.7883	-57.5714								-6.69861
98.9	-51.7883	-57.5867								-10.1929
99	-51.8188	-57.5714								-13.8245
99.1	-51.8494	-57.5867								-17.334
99.2	-51.8036	-57.5867								-20.874
99.3	-51.8341	-57.5867								-24.2157
99.4	-51.8494	-57.5867								-27.359
99.5	-51.8188	-57.6324								-30.304
99.6	-51.8341	-57.5714								-33.0048
99.7	-51.8341	-57.6172								-35.4767
99.8	-51.7883	-57.5867								-37.6739
99.9	-51.7883	-57.6324								-39.6423
100	-51.8188	-57.6172								-41.4276
100.1	-51.8036	-57.6172								-42.984
100.2	-51.8036	-57.6172								-44.342
100.3	-51.8341	-57.6324								-45.517
100.4	-51.8188	-57.6172								-46.5088
100.5	-51.8188	-57.6172								-47.4243
100.6	-51.8341	-57.663								-48.1415
100.7	-51.8036	-57.6324								-48.7671
100.8	-51.7883	-57.6477								-49.3164
100.9	-51.8036	-57.6477								-49.8047
101	-51.7731	-57.6935								-50.1709
101.1	-51.7731	-57.6935								-50.5218
101.2	-51.7578	-57.6935								-50.8118
101.3	-51.7273	-57.6935								-51.0864
101.4	-51.712	-57.7087								-51.3153
101.5	-51.712	-57.6782								-51.4832
101.6	-51.7425	-57.6782								-51.6052
101.7	-51.6968	-57.6935								-51.6968
101.8	-51.6815	-57.6935								-51.7731
101.9	-51.6968	-57.663								-51.7883
102	-51.712	-57.6935								-51.8646
102.1	-51.7273	-57.6782								-51.8951
102.2	-51.7273	-57.6782								-51.9104
102.3	-51.7731	-57.663								-51.9257
102.4	-51.7731	-57.6935								-51.8799
102.5	-51.7425	-57.7087								-51.8494
102.6	-51.7731	-57.6782								-51.8036
102.7	-51.7731	-57.6782								-51.7731
102.8	-51.7883	-57.7087								-51.7273
102.9	-51.8036	-57.663								-51.6663
103	-51.8188	-57.6935								-51.5747
103.1	-51.8036	-57.7087								-51.5747
103.2	-51.8036	-57.663								-51.5137
103.3	-51.7883	-57.6477								-51.4374
103.4	-51.7883	-57.6477								-51.4069
103.5	-51.7883	-57.6172								-51.3306
103.6	-51.7731	-57.6477								-51.3
103.7	-51.8188	-57.6172								-51.1932
103.8	-51.7731	-57.6324								-51.1322
103.9	-51.8036	-57.6019								-51.1017
104	-51.8036	-57.6019								-51.0254
104.1	-51.7883	-57.6172								-50.9186
104.2	-51.7883	-57.6019								-50.8575
104.3	-51.8188	-57.5867								-50.766
104.4	-51.8188	-57.6172								-50.6897
104.5	-51.8646	-57.5867								-50.5829
104.6	-51.8799	-57.5714								-50.5066
104.7	-51.8951	-57.5714								-50.415
104.8	-51.9104	-57.5409								-50.3235
104.9	-51.8799	-57.5104								-50.2167
105	-51.9104	-57.5104								-50.1251
105.1	-51.9257	-57.4951								-50.0641
105.2	-51.9562	-57.4951								-49.9725
105.3	-51.9714	-57.4799								-49.8657
105.4	-51.9409	-57.5104								-49.7894
105.5	-51.9714	-57.5104								-49.6521
105.6	-52.0019	-57.4799								-49.53
105.7	-52.0019	-57.4799								-49.4385
105.8	-52.0325	-57.4646								-49.3011
105.9	-52.0782	-57.4493								-49.2096
106	-52.124	-57.4493								-49.0875
106.1	-52.1088	-57.4799								-48.996
106.2	-52.124	-57.4646								-48.9044
106.3	-52.1545	-57.4493								-48.7976
106.4	-52.124	-57.4188								-48.7213
106.5	-52.124	-57.4188								-48.6145
106.6	-52.1545	-57.4188								-48.5229
106.7	-52.1393	-57.3578								-48.4314
106.8	-52.124	-57.4188								-48.3093
106.9	-52.1545	-57.3883								-48.2635
107	-52.1393	-57.373								-48.172
107.1	-52.1545	-57.3578								-48.0347
107.2	-52.1393	-57.3883								-47.9584
107.3	-52.1393	-57.3425								-47.821
107.4	-52.1088	-57.373								-47.7753
107.5	-52.124	-57.3425								-47.6837
107.6	-52.0935	-57.373								-47.5769
107.7	-52.124	-57.373								-47.5311
107.8	-52.1393	-57.3883								-47.4853
107.9	-52.1393	-57.3425								-47.4396
108	-52.1545	-57.3425								-47.3175
108.1	-52.1545	-57.3425								-47.2565
108.2	-52.1851	-57.3425								-47.1191
108.3	-52.1698	-57.3883								-47.0123
108.4	-52.2003	-57.3578								-46.9513
108.5	-52.1698	-57.3273								-46.8292
108.6	-52.1698	-57.3425								-46.7529
108.7	-52.1698	-57.3425								-46.6919
108.8	-52.1698	-57.373								-46.5851
108.9	-52.1698	-57.3273								-46.5088
109	-52.2003	-57.3273								-46.3867
109.1	-52.1851	-57.2662								-46.2799
109.2	-52.2156	-57.2815								-46.1731
109.3	-52.2156	-57.2967								-46.1121
109.4	-52.2461	-57.2815								-46.0358
109.5	-52.2003	-57.2357								-45.9595
109.6	-52.0172	-56.9916								-45.8527
109.7	-51.59	-56.6254								-45.7764
109.8	-51.178	-56.1676								-45.6696
109.9	-50.6287	-55.6641								-45.5475
110	-50.1099	-55.1758								-45.5017
110.1	-49.6521	-54.657								-45.4102
110.2	-49.2706	-54.245								-45.3033
110.3	-48.8739	-53.833								-45.1508
110.4	-48.4772	-53.4668								-45.0439
110.5	-48.0652	-53.0853								-44.9524
110.6	-47.6685	-52.7191								-44.8761
110.7	-47.287	-52.3682								-44.7998
110.8	-46.936	-52.0477								-44.6777
110.9	-46.5546	-51.651								-44.5404
111	-46.1731	-51.3458								-44.4641
111.1	-45.7611	-51.0559								-44.3878
111.2	-45.3644	-50.6897								-44.281
111.3	-44.9524	-50.354								-44.1589
111.4	-44.5251	-49.9878								-44.0826
111.5	-44.0521	-49.6826								-43.9758
111.6	-43.5944	-49.3011								-43.8843
111.7	-43.0756	-48.996								-43.7927
111.8	-42.5415	-48.6755								-43.7164
111.9	-42.0227	-48.3093								-43.6096
112	-41.4581	-47.9736								-43.5028
112.1	-40.8478	-47.6227								-43.3807
112.2	-40.2222	-47.2412								-43.3044
112.3	-39.5508	-46.9208								-43.2281
112.4	-38.7726	-46.5393								-43.1366
112.5	-37.8418	-46.1731								-43.045
112.6	-36.8195	-45.7764								-42.9535
112.7	-35.5835	-45.3949								-42.8772
112.8	-33.9508	-44.9524								-42.8009
112.9	-31.6467	-44.5557								-42.7246
113	-27.8931	-44.1437								-42.6483
113.1	-21.4386	-43.7012								-42.5873
113.2	-11.4746	-43.2434								-42.4652
113.3	1.00708	-42.7551								-42.3431
113.4	13.504	-42.16								-42.2821
113.5	23.6664	-41.5802								-42.16
113.6	29.8309	-41.0004								-42.099
113.7	31.0669	-40.2679								-41.9922
113.8	27.4506	-39.5203								-41.9311
113.9	19.7601	-38.6047								-41.8701
114	9.14001	-37.5061								-41.748
114.1	-2.73132	-36.0565								-41.6412
114.2	-14.5874	-34.0576								-41.5497
114.3	-25.5127	-30.8685								-41.5192
114.4	-34.9121	-24.9634								-41.4429
114.5	-42.6331	-15.0757								-41.3055
114.6	-48.6603	-1.80054								-41.2598
114.7	-53.1769	12.1765								-41.2292
114.8	-56.4575	24.0326								-41.0614
114.9	-58.7769	31.5857								-40.9698
115	-60.3027	33.8745								-40.9241
115.1	-61.3098	30.8075								-40.7867
115.2	-61.8591	23.1476								-40.6952
115.3	-62.149	12.2528								-40.6189
115.4	-62.1796	-0.198364								-40.4968
115.5	-62.1033	-12.7411								-40.4053
115.6	-61.8896	-24.292								-40.3595
115.7	-61.7065	-34.1492								-40.2222
115.8	-61.4624	-42.2821								-40.1459
115.9	-61.142	-48.6145								-40.0848
116	-60.8673	-53.2989								-39.9322
116.1	-60.5011	-56.7169								-39.8254
116.2	-60.1807	-59.0363								-39.7339
116.3	-59.8755	-60.5316								-39.6271
116.4	-59.5703	-61.4166								-39.4592
116.5	-59.2346	-61.9049								-39.3524
116.6	-58.9447	-62.0728								-39.2609
116.7	-58.609	-62.027								-39.1846
116.8	-58.3038	-61.8591								-39.0625
116.9	-58.0444	-61.615								-38.9404
117	-57.6935	-61.2793								-38.8184
117.1	-57.3425	-60.9741								-38.6963
117.2	-57.0373	-60.6232								-38.6047
117.3	-56.778	-60.2875								-38.4827
117.4	-56.488	-59.9518								-38.3301
117.5	-56.1829	-59.6313								-38.1317
117.6	-55.8929	-59.2499								-37.9944
117.7	-55.5725	-58.9447								-37.8418
117.8	-55.2978	-58.5937								-37.6282
117.9	-55.0384	-58.3038								-37.4451
118	-54.7485	-57.9529								-37.2467
118.1	-54.4891	-57.6324								-37.0636
118.2	-54.1992	-57.312								-36.9263
118.3	-53.9703	-57.0068								-36.7432
118.4	-53.6957	-56.6864								-36.5601
118.5	-53.3905	-56.3812								-36.3464
118.6	-53.1006	-56.1066								-36.1481
118.7	-52.8564	-55.7861								-35.8887
118.8	-52.5818	-55.4657								-35.675
118.9	-52.2613	-55.1605								-35.4767
119	-52.0172	-54.8859								-35.202
119.1	-51.6968	-54.6417								-34.9579
119.2	-51.4679	-54.2908								-34.668
119.3	-51.1932	-54.0466								-34.4086
119.4	-50.9338	-53.7872								-34.1186
119.5	-50.6744	-53.5126								-33.8135
119.6	-50.4456	-53.2684								-33.4473
119.7	-50.1556	-53.0395								-33.0963
119.8	-49.8962	-52.7801								-32.6843
119.9	-49.6674	-52.5818								-32.2113
120	-49.4232	-52.3071								-31.6315
120.1	-49.1333	-52.0782								-31.0211
120.2	-48.9197	-51.8341								-30.3345
120.3	-48.6145	-51.5594								-29.541
120.4	-48.3551	-51.3306								-28.6407
120.5	-48.1262	-51.0864								-27.6489
120.6	-47.8668	-50.827								-26.4435
120.7	-47.6685	-50.5829								-25.0397
120.8	-47.3633	-50.354								-23.3612
120.9	-47.0886	-50.1709								-21.2555
121	-46.814	-49.9268								-18.7683
121.1	-46.5546	-49.6979								-15.7318
121.2	-46.2494	-49.469								-12.2223
121.3	-46.0205	-49.2248								-8.45337
121.4	-45.7764	-49.0265								-4.68445
121.5	-45.4559	-48.8129								-1.35803
121.6	-45.2423	-48.6298								1.297
121.7	-44.9066	-48.4314								3.17383
121.8	-44.6167	-48.172								4.22668
121.9	-44.342	-48.0041								4.54712
122	-44.0979	-47.7753								4.16565
122.1	-43.7622	-47.5464								3.17383
122.2	-43.4875	-47.348								1.64795
122.3	-43.1366	-47.1039								-0.457764
122.4	-42.8619	-46.875								-2.91443
122.5	-42.4499	-46.6309								-5.7373
122.6	-42.099	-46.4325								-8.83484
122.7	-41.6717	-46.2341								-12.0239
122.8	-41.3055	-46.0052								-15.3046
122.9	-40.8783	-45.8221								-18.5547
123	-40.4205	-45.578								-21.6827
123.1	-39.978	-45.4254								-24.6735
123.2	-39.4134	-45.1813								-27.4963
123.3	-38.8946	-44.9676								-30.0903
123.4	-38.2996	-44.754								-32.5165
123.5	-37.6739	-44.5251								-34.668
123.6	-36.9415	-44.2963								-36.6363
123.7	-36.087	-44.0521								-38.4674
123.8	-35.0494	-43.8232								-39.9933
123.9	-33.844	-43.6401								-41.3971
124	-32.2266	-43.3807								-42.6483
124.1	-29.9683	-43.2281								-43.7469
124.2	-26.535	-43.0145								-44.693
124.3	-20.8435	-42.8314								-45.517
124.4	-12.2375	-42.6025								-46.2799
124.5	-1.51062	-42.4194								-46.936
124.6	9.39941	-42.2211								-47.5006
124.7	18.631	-41.9922								-48.0194
124.8	24.6277	-41.7938								-48.4009
124.9	26.7944	-41.5039								-48.7518
125	25.0854	-41.2903								-49.1028
125.1	19.8975	-40.9698								-49.3317
125.2	12.0697	-40.7257								-49.5453
125.3	2.57874	-40.4663								-49.7742
125.4	-7.61414	-40.1611								-49.881
125.5	-17.5476	-39.8254								-50.0793
125.6	-26.6418	-39.4897								-50.1709
125.7	-34.5001	-39.1235								-50.2777
125.8	-41.0767	-38.7115								-50.354
125.9	-46.3562	-38.2843								-50.4456
126	-50.4456	-37.7808								-50.4456
126.1	-53.5736	-37.2772								-50.5218
126.2	-55.8777	-36.7126								-50.5676
126.3	-57.4951	-36.0565								-50.5829
126.4	-58.6548	-35.2936								-50.5371
126.5	-59.3414	-34.4086								-50.5524
126.6	-59.8144	-33.3862								-50.5676
126.7	-60.0738	-32.074								-50.5524
126.8	-60.1807	-30.3192								-50.5218
126.9	-60.2112	-27.8473								-50.5218
127	-60.1044	-24.0326								-50.4913
127.1	-59.9365	-18.1885								-50.415
127.2	-59.7382	-10.0708								-50.3845
127.3	-59.5093	-0.473022								-50.3082
127.4	-59.3109	8.92639								-50.2472
127.5	-59.082	16.5558								-50.2014
127.6	-58.8074	21.6064								-50.1862
127.7	-58.548	23.5901								-50.1251
127.8	-58.3343	22.4762								-50.0336
127.9	-58.0749	18.692								-50.003
128	-57.8155	12.6495								-49.9573
128.1	-57.5104	5.05066								-49.8352
128.2	-57.2357	-3.37219								-49.7436
128.3	-56.9611	-11.9324								-49.6826
128.4	-56.6864	-20.1721								-49.6368
128.5	-56.427	-27.6642								-49.5148
128.6	-56.1523	-34.1949								-49.4842
128.7	-55.8929	-39.7644								-49.3774
128.8	-55.603	-44.2963								-49.3164
128.9	-55.3284	-47.9584								-49.2248
129	-55.0079	-50.7507								-49.1333
129.1	-54.7485	-52.9633								-49.0723
129.2	-54.5349	-54.5502								-48.9807
129.3	-54.2755	-55.7861								-48.9044
129.4	-53.9856	-56.5948								-48.8434
129.5	-53.772	-57.1442								-48.7213
129.6	-53.4973	-57.5256								-48.6145
129.7	-53.2532	-57.785								-48.5687
129.8	-53.0548	-57.8766								-48.4772
129.9	-52.8107	-57.8766								-48.4161
130	-52.6123	-57.8461								-48.3551
130.1	-52.3682	-57.7393								-48.2483
130.2	-52.1088	-57.6477								-48.2025
130.3	-51.8951	-57.5409								-48.0652
130.4	-51.6815	-57.3883								-48.0194
130.5	-51.4526	-57.2205								-47.9126
130.6	-51.239	-57.0068								-47.7905
130.7	-50.9796	-56.8542								-47.7142
130.8	-50.7507	-56.6406								-47.6379
130.9	-50.5066	-56.427								-47.5464
131	-50.2777	-56.2286								-47.4548
131.1	-50.0183	-56.0303								-47.3938
131.2	-49.8199	-55.8166								-47.348
131.3	-49.5758	-55.603								-47.2412
131.4	-49.3469	-55.4047								-47.1649
131.5	-49.1486	-55.1758								-47.1039
131.6	-48.9197	-55.0079								-46.9971
131.7	-48.6755	-54.8401								-46.9055
131.8	-48.4467	-54.5959								-46.814
131.9	-48.2635	-54.4434								-46.7224
132	-48.0347	-54.2297								-46.6156
132.1	-47.7905	-54.0619								-46.5698
132.2	-47.5464	-53.833								-46.4935
132.3	-47.348	-53.6804								-46.4172
132.4	-47.1497	-53.5126								-46.3257
132.5	-46.9208	-53.3142								-46.2341
132.6	-46.6309	-53.1464								-46.0968
132.7	-46.402	-52.948								-46.0205
132.8	-46.1273	-52.7649								-45.8832
132.9	-45.929	-52.5665								-45.8374
133	-45.6543	-52.3834								-45.7306
133.1	-45.3949	-52.2003								-45.639
133.2	-45.1202	-52.0172								-45.5475
133.3	-44.8608	-51.8188								-45.4712
133.4	-44.6014	-51.6815								-45.3491
133.5	-44.3268	-51.4832								-45.2881
133.6	-44.0826	-51.2695								-45.1965
133.7	-43.8538	-51.0712								-45.1202
133.8	-43.5486	-50.8881								-45.0287
133.9	-43.2739	-50.7202								-44.9066
134	-42.9382	-50.5524								-44.8151
134.1	-42.6636	-50.3998								-44.7693
134.2	-42.3126	-50.1709								-44.6472
134.3	-42.0074	-50.0183								-44.6014
134.4	-41.626	-49.8505								-44.4641
134.5	-41.3055	-49.7131								-44.4031
134.6	-40.9546	-49.5453								-44.3268
134.7	-40.5884	-49.3469								-44.22
134.8	-40.1764	-49.1791								-44.2047
134.9	-39.7644	-48.9655								-44.0674
135	-39.3219	-48.7823								-44.0216
135.1	-38.8031	-48.5992								-43.9453
135.2	-38.1927	-48.4467								-43.8385
135.3	-37.5214	-48.2483								-43.7012
135.4	-36.8042	-48.0957								-43.6096
135.5	-36.0107	-47.9279								-43.5333
135.6	-35.0647	-47.7905								-43.4265
135.7	-33.9661	-47.6227								-43.3197
135.8	-32.5165	-47.4853								-43.2892
135.9	-30.6396	-47.348								-43.2129
136	-27.9083	-47.1954								-43.1519
136.1	-23.6053	-47.0581								-43.1061
136.2	-16.7541	-46.8597								-42.984
136.3	-7.49206	-46.7224								-42.923
136.4	3.14331	-46.5698								-42.8162
136.5	13.0463	-46.4325								-42.7246
136.6	20.5994	-46.2952								-42.6788
136.7	24.9481	-46.1578								-42.5415
136.8	25.589	-45.99								-42.4347
136.9	22.8119	-45.8832								-42.3584
137	16.9373	-45.7764								-42.2516
137.1	8.8501	-45.6085								-42.1753
137.2	-0.595093	-45.4559								-42.0685
137.3	-10.437	-45.3033								-42.0074
137.4	-19.8517	-45.1508								-41.9159
137.5	-28.3966	-44.9829								-41.8091
137.6	-35.7361	-44.8608								-41.7023
137.7	-41.8091	-44.7388								-41.6412
137.8	-46.7224	-44.5862								-41.5649
137.9	-50.5524	-44.4183								-41.4734
138	-53.4515	-44.3115								-41.3513
138.1	-55.603	-44.1437								-41.2598
138.2	-57.1594	-43.9911								-41.153
138.3	-58.197	-43.8385								-41.0309
138.4	-58.9142	-43.7164								-40.9241
138.5	-59.3262	-43.5791								-40.8173
138.6	-59.6008	-43.3502								-40.741
138.7	-59.6924	-43.2281								-40.6494
138.8	-59.6619	-43.0908								-40.4968
138.9	-59.5398	-42.9077								-40.4053
139	-59.4482	-42.7704								-40.2985
139.1	-59.2957	-42.6178								-40.2527
139.2	-59.082	-42.4194								-40.1306
139.3	-58.8684	-42.3279								-40.0543
139.4	-58.6243	-42.1905								-39.978
139.5	-58.3954	-42.0074								-39.8712
139.6	-58.1207	-41.8549								-39.7491
139.7	-57.8613	-41.7328								-39.6728
139.8	-57.6324	-41.5497								-39.6118
139.9	-57.3425	-41.3361								-39.4745
140	-57.1136	-41.1682								-39.3066
140.1	-56.778	-40.9241								-39.154
140.2	-56.488	-40.7562								-38.9862
140.3	-56.2897	-40.5273								-38.8336
140.4	-56.015	-40.2985								-38.681
140.5	-55.7556	-40.0543								-38.5437
140.6	-55.5267	-39.8712								-38.4521
140.7	-55.2368	-39.5813								-38.2996
140.8	-54.9774	-39.3372								-38.208
140.9	-54.718	-39.0472								-38.0859
141	-54.4586	-38.7115								-37.9639
141.1	-54.2145	-38.3911								-37.8571
141.2	-53.9398	-38.0249								-37.7502
141.3	-53.6804	-37.6739								-37.5824
141.4	-53.4058	-37.262								-37.3993
141.5	-53.1769	-36.8195								-37.262
141.6	-52.948	-36.3617								-37.0941
141.7	-52.6886	-35.8276								-36.9873
141.8	-52.4445	-35.2478								-36.7889
141.9	-52.2461	-34.6069								-36.6363
142	-52.0019	-33.8592								-36.4532
142.1	-51.7578	-33.0048								-36.2701
142.2	-51.5442	-31.9977								-36.1023
142.3	-51.3763	-30.7617								-35.8887
142.4	-51.1322	-29.129								-35.7056
142.5	-50.9186	-26.9775								-35.4614
142.6	-50.6897	-23.7274								-35.2173
142.7	-50.4913	-18.9972								-34.9731
142.8	-50.2472	-12.3901								-34.729
142.9	-50.0183	-4.42505								-34.4391
143	-49.8047	3.7384								-34.1644
143.1	-49.5453	10.8643								-33.8898
143.2	-49.3011	16.1133								-33.6151
143.3	-49.0875	18.9514								-33.2947
143.4	-48.8586	19.3634								-32.9285
143.5	-48.5992	17.5781								-32.608
143.6	-48.4314	13.855								-32.2266
143.7	-48.1873	8.57544								-31.8298
143.8	-48.0194	2.18201								-31.4484
143.9	-47.7447	-4.82178								-31.0364
144	-47.5159	-12.0087								-30.5634
144.1	-47.3175	-19.0277								-30.0293
144.2	-47.0428	-25.4822								-29.4342
144.3	-46.8445	-31.2805								-28.7323
144.4	-46.5851	-36.3617								-27.9083
144.5	-46.3257	-40.6189								-27.0538
144.6	-46.0815	-44.1894								-26.062
144.7	-45.8527	-47.1191								-24.9176
144.8	-45.5933	-49.4537								-23.5596
144.9	-45.3491	-51.3306								-21.9421
145	-45.0745	-52.7649								-20.0958
145.1	-44.7845	-53.8635								-17.8833
145.2	-44.5404	-54.6875								-15.3656
145.3	-44.281	-55.3131								-12.619
145.4	-44.0826	-55.8166								-9.75037
145.5	-43.8538	-56.1371								-6.89697
145.6	-43.6401	-56.366								-4.40979
145.7	-43.3655	-56.488								-2.36511
145.8	-43.1213	-56.5491								-0.88501
145.9	-42.8925	-56.6254								-0.0305176
146	-42.5873	-56.5948								0.289917
146.1	-42.2668	-56.5491								0.0305176
146.2	-41.9922	-56.488								-0.640869
146.3	-41.6717	-56.3812								-1.75476
146.4	-41.3666	-56.3049								-3.2196
146.5	-41.0461	-56.1676								-4.91333
146.6	-40.7257	-56.0608								-6.94275
146.7	-40.4358	-55.9387								-9.1095
146.8	-40.0238	-55.7861								-11.4441
146.9	-39.6271	-55.6488								-13.855
147	-39.2151	-55.5267								-16.3574
147.1	-38.7268	-55.3589								-18.7988
147.2	-38.1927	-55.2063								-21.2402
147.3	-37.6892	-55.0537								-23.6206
147.4	-37.1094	-54.8859								-25.8789
147.5	-36.4227	-54.7485								-28.0762
147.6	-35.7056	-54.5654								-30.1056
147.7	-34.8206	-54.4434								-31.9824
147.8	-33.8287	-54.2297								-33.7677
147.9	-32.608	-54.0314								-35.4462
148	-30.9448	-53.833								-36.9415
148.1	-28.6713	-53.6652								-38.3606
148.2	-25.238	-53.421								-39.6271
148.3	-19.8212	-53.2837								-40.7867
148.4	-11.9781	-53.1006								-41.8396
148.5	-2.39563	-52.9327								-42.7856
148.6	7.41577	-52.7344								-43.5944
148.7	15.7623	-52.597								-44.3573
148.8	21.4539	-52.4597								-45.0134
148.9	23.8953	-52.2613								-45.6543
149	23.1171	-52.0477								-46.1578
149.1	19.3176	-51.9104								-46.6461
149.2	13.031	-51.7578								-47.0581
149.3	5.06592	-51.5747								-47.4548
149.4	-3.8147	-51.3916								-47.8058
149.5	-12.8326	-51.2695								-48.0957
149.6	-21.3623	-51.1017								-48.3551
149.7	-29.1595	-50.9186								-48.5992
149.8	-35.8429	-50.7507								-48.8129
149.9	-41.5192	-50.6287								-48.9655
150	-46.0815	-50.4761								-49.1638
150.1	-49.6979	-50.3693								-49.2554
150.2	-52.4597	-50.1862								-49.3774
150.3	-54.6112	-50.0946								-49.408
150.4	-56.1371	-49.9268								-49.5148
150.5	-57.2357	-49.7894								-49.5758
150.6	-57.9834	-49.6521								-49.6368
150.7	-58.5022	-49.469								-49.6674
150.8	-58.7769	-49.3317								-49.6979
150.9	-58.9447	-49.1638								-49.7436
151	-59.0057	-49.057								-49.7436
151.1	-58.9752	-48.9349								-49.7131
151.2	-58.8989	-48.8129								-49.7589
151.3	-58.7921	-48.6603								-49.6979
151.4	-58.67	-48.5687								-49.6826
151.5	-58.5022	-48.4314								-49.6674
151.6	-58.3038	-48.2635								-49.6826
151.7	-58.1055	-48.1415								-49.6368
151.8	-57.8766	-47.9889								-49.5758
151.9	-57.6324	-47.8821								-49.5605
152	-57.373	-47.7447								-49.469
152.1	-57.1289	-47.5922								-49.4385
152.2	-56.9	-47.4396								-49.408
152.3	-56.6406	-47.287								-49.3317
152.4	-56.3965	-47.1497								-49.2859
152.5	-56.1371	-47.0276								-49.1943
152.6	-55.8777	-46.9055								-49.1486
152.7	-55.6488	-46.7987								-49.0875
152.8	-55.3894	-46.7071								-48.996
152.9	-55.1758	-46.524								-48.8892
153	-54.9469	-46.4325								-48.8129
153.1	-54.657	-46.2494								-48.7366
153.2	-54.4128	-46.1426								-48.6298
153.3	-54.184	-45.99								-48.5992
153.4	-53.9398	-45.8221								-48.4467
153.5	-53.7109	-45.6696								-48.3551
153.6	-53.4668	-45.5475								-48.2941
153.7	-53.2684	-45.4102								-48.233
153.8	-53.0853	-45.2728								-48.1415
153.9	-52.8564	-45.1355								-48.0804
154	-52.6428	-45.0134								-47.9736
154.1	-52.4292	-44.8914								-47.8973
154.2	-52.2308	-44.754								-47.8516
154.3	-52.0019	-44.5557								-47.821
154.4	-51.7883	-44.4183								-47.7142
154.5	-51.59	-44.2963								-47.6685
154.6	-51.3763	-44.1589								-47.6074
154.7	-51.1475	-44.0063								-47.5159
154.8	-50.9644	-43.8843								-47.4396
154.9	-50.7355	-43.7317								-47.4091
155	-50.5676	-43.6249								-47.3328
155.1	-50.3845	-43.5181								-47.2565
155.2	-50.1862	-43.396								-47.2259
155.3	-50.003	-43.2434								-47.1344
155.4	-49.8352	-43.1061								-46.9971
155.5	-49.6368	-42.923								-46.9665
155.6	-49.4232	-42.8009								-46.8445
155.7	-49.2706	-42.6788								-46.7987
155.8	-49.0723	-42.4957								-46.6919
155.9	-48.8892	-42.3279								-46.6309
156	-48.7061	-42.16								-46.5393
156.1	-48.4772	-41.9617								-46.4783
156.2	-48.2635	-41.7938								-46.3562
156.3	-48.0804	-41.5802								-46.2799
156.4	-47.8516	-41.3666								-46.2189
156.5	-47.6685	-41.1682								-46.0968
156.6	-47.4853	-40.9851								-45.99
156.7	-47.2717	-40.7104								-45.929
156.8	-47.0581	-40.4968								-45.8374
156.9	-46.875	-40.2985								-45.7611
157	-46.6919	-40.0848								-45.6696
157.1	-46.524	-39.8102								-45.5933
157.2	-46.3867	-39.6118								-45.5017
157.3	-46.2036	-39.3524								-45.4254
157.4	-46.0358	-39.0625								-45.3186
157.5	-45.8679	-38.8184								-45.2728
157.6	-45.6238	-38.5437								-45.2118
157.7	-45.4559	-38.1622								-45.0745
157.8	-45.2576	-37.7655								-45.0134
157.9	-45.0592	-37.3993								-44.9066
158	-44.8608	-37.0178								-44.7998
158.1	-44.6167	-36.5448								-44.7235
158.2	-44.4336	-36.026								-44.6167
158.3	-44.2657	-35.553								-44.5099
158.4	-44.0521	-35.0189								-44.4031
158.5	-43.8385	-34.4238								-44.3115
158.6	-43.6401	-33.7982								-44.2047
158.7	-43.396	-33.0505								-44.0979
158.8	-43.1213	-32.1045								-44.0063
158.9	-42.9687	-30.9601								-43.9148
159	-42.7856	-29.4647								-43.808
159.1	-42.511	-27.4506								-43.7012
159.2	-42.2821	-24.5514								-43.5944
159.3	-42.038	-20.34								-43.5028
159.4	-41.7633	-14.4043								-43.4418
159.5	-41.4734	-7.01904								-43.3655
159.6	-41.2292	0.930786								-43.2892
159.7	-40.8936	8.27026								-43.1824
159.8	-40.6189	13.9923								-43.1213
159.9	-40.2679	17.5629								-43.0756
160	-39.917	18.8751								-42.9535
160.1	-39.505	17.9443								-42.8619
160.2	-39.154	15.1367								-42.7399
160.3	-38.6963	10.6506								-42.6636
160.4	-38.2385	4.86755								-42.5568
160.5	-37.7045	-1.64795								-42.5262
160.6	-37.2314	-8.56018								-42.4042
160.7	-36.5753	-15.3809								-42.3126
160.8	-35.9497	-21.9116								-42.2668
160.9	-35.2325	-27.8625								-42.1448
161	-34.3628	-33.2489								-42.0532
161.1	-33.3099	-37.8265								-41.9464
161.2	-32.0129	-41.7328								-41.8549
161.3	-30.3192	-45.0134								-41.8243
161.4	-28.0151	-47.6837								-41.748
161.5	-24.5361	-49.7589								-41.6717
161.6	-19.1193	-51.4526								-41.5649
161.7	-11.4899	-52.7649								-41.4734
161.8	-2.21252	-53.8177								-41.3818
161.9	7.15637	-54.5959								-41.275
162	15.1367	-55.1758								-41.1987
162.1	20.5688	-55.5572								-41.1072
162.2	22.995	-55.8777								-41.0461
162.3	22.4152	-56.0455								-40.9088
162.4	19.104	-56.1676								-40.802
162.5	13.3667	-56.2439								-40.7104
162.6	5.92041	-56.2286								-40.6189
162.7	-2.48718	-56.2134								-40.5426
162.8	-11.1847	-56.1829								-40.39
162.9	-19.5923	-56.076								-40.3137
163	-27.3132	-55.954								-40.1916
163.1	-34.0729	-55.8624								-40.1154
163.2	-39.8102	-55.7709								-40.0543
163.3	-44.5557	-55.6488								-39.978
163.4	-48.2635	-55.4962								-39.8865
163.5	-51.2543	-55.3589								-39.7797
163.6	-53.5126	-55.2063								-39.6881
163.7	-55.2063	-54.9927								-39.6118
163.8	-56.4423	-54.8553								-39.5203
163.9	-57.3425	-54.7028								-39.4134
164	-57.9376	-54.5502								-39.3829
164.1	-58.3191	-54.3365								-39.3372
164.2	-58.548	-54.1687								-39.2151
164.3	-58.6395	-53.9551								-39.093
164.4	-58.6853	-53.772								-39.0778
164.5	-58.5937	-53.5736								-38.9862
164.6	-58.5022	-53.421								-38.8946
164.7	-58.3801	-53.2074								-38.8031
164.8	-58.197	-53.0243								-38.6658
164.9	-58.0444	-52.8564								-38.5895
165	-57.8461	-52.7039								-38.4674
165.1	-57.6477	-52.536								-38.3606
165.2	-57.4799	-52.3682								-38.269
165.3	-57.251	-52.1851								-38.1317
165.4	-57.0679	-52.0172								-38.0249
165.5	-56.8237	-51.8951								-37.9333
165.6	-56.6406	-51.7273								-37.8418
165.7	-56.4117	-51.5137								-37.7808
165.8	-56.1981	-51.3611								-37.6129
165.9	-55.9845	-51.1932								-37.5214
166	-55.7709	-51.0406								-37.4298
166.1	-55.5267	-50.8728								-37.3077
166.2	-55.2978	-50.7202								-37.1704
166.3	-55.1147	-50.6287								-37.0636
166.4	-54.9011	-50.415								-36.911
166.5	-54.6875	-50.3082								-36.8042
166.6	-54.4891	-50.1404								-36.7126
166.7	-54.2297	-50.0183								-36.5753
166.8	-54.0009	-49.881								-36.4838
166.9	-53.8025	-49.7284								-36.4075
167	-53.5736	-49.5911								-36.2854
167.1	-53.421	-49.4232								-36.1481
167.2	-53.1769	-49.2706								-36.0107
167.3	-53.009	-49.118								-35.8582
167.4	-52.7649	-49.0265								-35.7513
167.5	-52.597	-48.8892								-35.5988
167.6	-52.3834	-48.7823								-35.4614
167.7	-52.1545	-48.645								-35.3088
167.8	-51.9257	-48.5229								-35.141
167.9	-51.712	-48.3398								-35.0189
168	-51.4679	-48.233								-34.8663
168.1	-51.239	-48.0957								-34.7595
168.2	-51.0864	-47.9584								-34.5764
168.3	-50.8728	-47.8516								-34.4543
168.4	-50.705	-47.699								-34.2407
168.5	-50.4761	-47.5769								-34.0729
168.6	-50.3235	-47.4701								-33.8898
168.7	-50.1404	-47.348								-33.6914
168.8	-49.9573	-47.2259								-33.493
168.9	-49.7894	-47.1039								-33.2947
169	-49.5758	-46.9665								-33.0658
169.1	-49.3927	-46.8292								-32.7911
169.2	-49.1943	-46.6919								-32.5165
169.3	-48.9655	-46.5698								-32.2266
169.4	-48.7976	-46.4325								-31.9214
169.5	-48.645	-46.2646								-31.5552
169.6	-48.4009	-46.1884								-31.2042
169.7	-48.2483	-46.0358								-30.8838
169.8	-48.0957	-45.9137								-30.4718
169.9	-47.8821	-45.7764								-30.014
170	-47.699	-45.639								-29.48
170.1	-47.5311	-45.4712								-29.007
170.2	-47.3328	-45.3339								-28.4424
170.3	-47.1649	-45.2118								-27.8015
170.4	-46.936	-45.0439								-27.0691
170.5	-46.7682	-44.9371								-26.2756
170.6	-46.5698	-44.7998								-25.4211
170.7	-46.4172	-44.6625								-24.4598
170.8	-46.2494	-44.5557								-23.3459
170.9	-46.0663	-44.3726								-22.1405
171	-45.8679	-44.2505								-20.813
171.1	-45.6696	-44.1589								-19.3329
171.2	-45.517	-44.0063								-17.6239
171.3	-45.2881	-43.808								-15.8081
171.4	-45.1202	-43.6859								-13.855
171.5	-44.9371	-43.5028								-11.9171
171.6	-44.7388	-43.3197								-10.0861
171.7	-44.5251	-43.1519								-8.42285
171.8	-44.3268	-42.9535								-7.04956
171.9	-44.1132	-42.8162								-5.9967
172	-43.869	-42.6025								-5.2948
172.1	-43.6554	-42.4805								-4.88281
172.2	-43.4265	-42.3126								-4.88281
172.3	-43.1671	-42.16								-5.15747
172.4	-42.9535	-42.0227								-5.7373
172.5	-42.6788	-41.8243								-6.57654
172.6	-42.4194	-41.626								-7.61414
172.7	-42.1295	-41.4886								-8.81958
172.8	-41.8549	-41.3361								-10.2539
172.9	-41.5497	-41.1682								-11.8408
173	-41.2292	-41.0004								-13.5498
173.1	-40.9241	-40.8173								-15.274
173.2	-40.5884	-40.6036								-17.1204
173.3	-40.2374	-40.4053								-18.9667
173.4	-39.8712	-40.2069								-20.7672
173.5	-39.4287	-39.9933								-22.5372
173.6	-39.0778	-39.7644								-24.3225
173.7	-38.6353	-39.5508								-26.0162
173.8	-38.1775	-39.3219								-27.6947
173.9	-37.6892	-39.1235								-29.2511
174	-37.2009	-38.8946								-30.7312
174.1	-36.5753	-38.6658								-32.135
174.2	-35.965	-38.4064								-33.432
174.3	-35.2631	-38.147								-34.668
174.4	-34.5001	-37.9486								-35.8582
174.5	-33.493	-37.6434								-36.972
174.6	-32.3181	-37.323								-37.9639
174.7	-30.7159	-37.0178								-38.9252
174.8	-28.4729	-36.6669								-39.8254
174.9	-25.0549	-36.2549								-40.6342
175	-19.8364	-35.7971								-41.3818
175.1	-12.2375	-35.3851								-42.0685
175.2	-3.02124	-34.79								-42.7093
175.3	6.50024	-34.2102								-43.2587
175.4	14.5874	-33.5693								-43.7775
175.5	20.2179	-32.8217								-44.22
175.6	22.8424	-31.9366								-44.6625
175.7	22.4609	-30.8838								-45.0287
175.8	19.1956	-29.6631								-45.3949
175.9	13.6414	-28.0457								-45.7764
176	6.24084	-26.0468								-46.051
176.1	-2.10571	-23.1476								-46.3104
176.2	-10.8795	-19.0582								-46.5393
176.3	-19.2718	-13.5193								-46.7224
176.4	-27.0233	-6.74438								-46.9513
176.5	-33.8135	0.396728								-47.1191
176.6	-39.5355	6.92749								-47.287
176.7	-44.2963	12.0239								-47.4396
176.8	-48.0499	15.2893								-47.5464
176.9	-51.0712	16.5405								-47.6532
177	-53.3295	15.976								-47.76
177.1	-55.0384	13.6108								-47.8516
177.2	-56.2897	9.82666								-47.9279
177.3	-57.2052	4.86755								-48.0041
177.4	-57.8461	-0.854492								-48.0957
177.5	-58.2886	-6.95801								-48.1415
177.6	-58.5175	-13.2141								-48.1873
177.7	-58.7006	-19.2718								-48.2178
177.8	-58.7463	-24.9634								-48.2025
177.9	-58.7006	-30.1361								-48.2025
178	-58.6243	-34.7137								-48.2178
178.1	-58.5327	-38.6963								-48.172
178.2	-58.3801	-42.0532								-48.172
178.3	-58.2886	-44.8761								-48.172
178.4	-58.1055	-47.2107								-48.1415
178.5	-57.9071	-49.1486								-48.111
178.6	-57.724	-50.6439								-48.0804
178.7	-57.4493	-51.8951								-48.0652
178.8	-57.2357	-52.8412								-48.0499
178.9	-57.0221	-53.6041								-48.0194
179	-56.778	-54.1992								-47.9889
179.1	-56.5491	-54.657								-47.9126
179.2	-56.3354	-54.9774								-47.8668
179.3	-56.1371	-55.2368								-47.8363
179.4	-55.8472	-55.4199								-47.8058
179.5	-55.6641	-55.5267								-47.76
179.6	-55.4352	-55.5878								-47.7142
179.7	-55.2063	-55.6488								-47.7142
179.8	-54.9622	-55.6335								-47.6227
179.9	-54.7333	-55.5572								-47.6074
180	-54.4891	-55.4962								-47.5616
180.1	-54.2755	-55.3894								-47.5311
180.2	-54.0771	-55.3284								-47.4548
180.3	-53.833	-55.2368								-47.4091
180.4	-53.6041	-55.1147								-47.3785
180.5	-53.36	-54.9774								-47.3175
180.6	-53.2074	-54.779								-47.2565
180.7	-52.9785	-54.6722								-47.1954
180.8	-52.8107	-54.5349								-47.1802
180.9	-52.5665	-54.3823								-47.0886
181	-52.3987	-54.184								-47.0734
181.1	-52.1698	-54.0924								-46.9665
181.2	-52.0019	-53.9246								-46.9513
181.3	-51.8188	-53.772								-46.9055
181.4	-51.5747	-53.6194								-46.8445
181.5	-51.3916	-53.4821								-46.7529
181.6	-51.178	-53.3142								-46.7071
181.7	-50.9644	-53.1158								-46.6766
181.8	-50.7202	-52.9938								-46.6003
181.9	-50.5218	-52.8107								-46.5546
182	-50.3387	-52.6886								-46.4935
182.1	-50.1404	-52.5055								-46.4172
182.2	-49.9268	-52.3224								-46.3867
182.3	-49.7436	-52.1698								-46.2952
182.4	-49.5605	-52.0019								-46.2341
182.5	-49.3469	-51.8188								-46.1578
182.6	-49.118	-51.6968								-46.0815
182.7	-48.9807	-51.4984								-46.0052
182.8	-48.7061	-51.3763								-45.9442
182.9	-48.5382	-51.178								-45.8984
183	-48.3246	-51.0254								-45.8221
183.1	-48.1567	-50.8728								-45.7611
183.2	-47.9736	-50.6897								-45.6696
183.3	-47.7295	-50.5829								-45.5627
183.4	-47.5311	-50.4608								-45.5017
183.5	-47.348	-50.3082								-45.4102
183.6	-47.1497	-50.1556								-45.3491
183.7	-46.9513	-50.0183								-45.3033
183.8	-46.7377	-49.8962								-45.2118
183.9	-46.5698	-49.7589								-45.1355
184	-46.3715	-49.6216								-45.0897
184.1	-46.1731	-49.4842								-45.0287
184.2	-46.0052	-49.3469								-44.9676
184.3	-45.7458	-49.1943								-44.9219
184.4	-45.578	-49.0723								-44.8608
184.5	-45.3949	-48.9349								-44.7845
184.6	-45.1965	-48.7976								-44.7235
184.7	-45.0134	-48.7061								-44.6777
184.8	-44.8456	-48.5687								-44.6167
184.9	-44.693	-48.4924								-44.5709
185	-44.5099	-48.3551								-44.5404
185.1	-44.281	-48.233								-44.4488
185.2	-44.0674	-48.111								-44.4031
185.3	-43.8538	-47.9736								-44.3268
185.4	-43.6401	-47.8821								-44.3115
185.5	-43.4723	-47.76								-44.2657
185.6	-43.2281	-47.6685								-44.1284
185.7	-43.0145	-47.4853								-44.0521
185.8	-42.7246	-47.3938								-43.9606
185.9	-42.5262	-47.3022								-43.8843
186	-42.2363	-47.1802								-43.869
186.1	-41.9922	-47.0581								-43.7469
186.2	-41.7023	-46.9818								-43.7164
186.3	-41.4886	-46.875								-43.6096
186.4	-41.1682	-46.7834								-43.5333
186.5	-40.9088	-46.6614								-43.4875
186.6	-40.5884	-46.6003								-43.396
186.7	-40.2222	-46.463								-43.3502
186.8	-39.9475	-46.3409								-43.2892
186.9	-39.6423	-46.2494								-43.1976
187	-39.2456	-46.1273								-43.1366
187.1	-38.8641	-46.051								-43.0908
187.2	-38.3759	-45.9137								-43.0298
187.3	-37.9333	-45.8374								-42.9687
187.4	-37.4145	-45.7611								-42.8619
187.5	-36.85	-45.6085								-42.8314
187.6	-36.2396	-45.5017								-42.7399
187.7	-35.5072	-45.4102								-42.6788
187.8	-34.7137	-45.2881								-42.5873
187.9	-33.7067	-45.1965								-42.5262
188	-32.547	-45.0745								-42.4499
188.1	-30.9906	-44.9982								-42.4194
188.2	-28.9154	-44.8761								-42.3279
188.3	-25.8484	-44.7388								-42.2668
188.4	-21.1487	-44.6167								-42.1905
188.5	-14.2212	-44.5404								-42.1295
188.6	-5.31006	-44.4031								-42.0837
188.7	4.24194	-44.2505								-41.9922
188.8	12.8174	-44.1589								-41.9464
188.9	19.165	-43.9911								-41.8701
189	22.5677	-43.93								-41.8091
189.1	22.9034	-43.808								-41.7786
189.2	20.3094	-43.7164								-41.7175
189.3	15.1825	-43.6249								-41.6565
189.4	8.14819	-43.4723								-41.6412
189.5	-0.0915527	-43.3807								-41.5344
189.6	-8.7738	-43.2587								-41.4886
189.7	-17.2882	-43.1519								-41.4429
189.8	-25.2228	-43.0756								-41.4276
189.9	-32.2266	-42.9077								-41.3818
190	-38.269	-42.8009								-41.3055
190.1	-43.1671	-42.6331								-41.2292
190.2	-47.1802	-42.4805								-41.153
190.3	-50.3082	-42.3584								-41.0919
190.4	-52.7496	-42.1905								-41.0004
190.5	-54.5959	-42.0532								-40.9546
190.6	-55.9692	-41.9311								-40.8325
190.7	-56.9916	-41.7633								-40.741
190.8	-57.6782	-41.6107								-40.6952
190.9	-58.1055	-41.4581								-40.6342
191	-58.4106	-41.2903								-40.5579
191.1	-58.5937	-41.0919								-40.4816
191.2	-58.6395	-40.9241								-40.39
191.3	-58.67	-40.741								-40.3442
191.4	-58.5785	-40.5884								-40.2527
191.5	-58.4564	-40.4205								-40.2679
191.6	-58.3496	-40.2222								-40.1916
191.7	-58.1818	-40.0391								-40.1764
191.8	-58.0292	-39.8102								-40.1001
191.9	-57.9071	-39.6423								-40.0696
192	-57.663	-39.444								-40.0085
192.1	-57.4646	-39.2609								-39.9628
192.2	-57.2662	-39.032								-39.917
192.3	-57.0373	-38.7878								-39.8865
192.4	-56.8085	-38.5742
192.5	-56.5796	-38.3148
192.6	-56.3507	-38.1012
192.7	-56.1371	-37.796
192.8	-55.9082	-37.4908
192.9	-55.6946	-37.2009
193	-55.5267	-36.8805
193.1	-55.3284	-36.5143
193.2	-55.1453	-36.1328
193.3	-54.8706	-35.7361
193.4	-54.6265	-35.3241
193.5	-54.4739	-34.8968
193.6	-54.2297	-34.3323
193.7	-54.0619	-33.7372
193.8	-53.833	-33.0811
193.9	-53.5736	-32.3639
194	-53.3752	-31.4789
194.1	-53.1311	-30.4565
194.2	-52.9327	-29.129
194.3	-52.7191	-27.4506
194.4	-52.5207	-25.1617
194.5	-52.2919	-22.171
194.6	-52.063	-17.9749
194.7	-51.8799	-12.5122
194.8	-51.651	-6.08826
194.9	-51.4526	0.50354
195	-51.2695	6.42395
195.1	-51.0406	10.9863
195.2	-50.8575	13.7787
195.3	-50.6897	14.801
195.4	-50.4608	14.1754
195.5	-50.293	12.0087
195.6	-50.0641	8.57544
195.7	-49.9268	4.0741
195.8	-49.7131	-1.2207
195.9	-49.5148	-6.88171
196	-49.3774	-12.6953
196.1	-49.1638	-18.3563
196.2	-49.0112	-23.6816
196.3	-48.8434	-28.5797
196.4	-48.6755	-32.9285
196.5	-48.5077	-36.8347
196.6	-48.2635	-40.1154
196.7	-48.111	-43.0603
196.8	-47.9431	-45.3796
196.9	-47.699	-47.3785
197	-47.4853	-49.0265
197.1	-47.3022	-50.354
197.2	-47.1344	-51.4069
197.3	-46.936	-52.2461
197.4	-46.7377	-52.9327
197.5	-46.5088	-53.4668
197.6	-46.3562	-53.894
197.7	-46.1578	-54.1992
197.8	-45.9595	-54.3976
197.9	-45.8069	-54.5807
198	-45.5933	-54.6722
198.1	-45.4407	-54.7333
198.2	-45.2423	-54.7638
198.3	-45.0745	-54.7943
198.4	-44.8914	-54.8096
198.5	-44.6777	-54.718
198.6	-44.4794	-54.6265
198.7	-44.2657	-54.6112
198.8	-44.0369	-54.5044
198.9	-43.8538	-54.3976
199	-43.6096	-54.2603
199.1	-43.4113	-54.184
199.2	-43.1976	-54.0161
199.3	-42.9535	-53.8788
199.4	-42.7093	-53.7567
199.5	-42.4652	-53.6652
199.6	-42.2516	-53.5431
199.7	-42.0532	-53.3905
199.8	-41.8091	-53.2532
199.9	-41.5192	-53.1158
200	-41.214	-52.9785
200.1	-40.9393	-52.8564
200.2	-40.6494	-52.6886
[truncated: 51,997 more rows]

## Sheet: Fig 1 S2b
Time (ms)	MP (mV)											13502011	Voltage responses						disp
0.05	-62.6526											0	140	280	420	560	700nano
0.1	-62.7136										0	-55.0232	-45.8984	-71.5027	-71.1975	-52.0019	-53.6804	0	0	60	70
0.15	-62.439										0.05	-54.5959	-45.5017	-71.3806	-71.0144	-52.2766	-53.9551	500	0	260	70
0.2	-62.6831										0.1	-54.9622	-45.0745	-71.6858	-71.0754	-52.4902	-53.833
0.25	-62.2864										0.15	-54.9622	-44.9829	-71.5637	-71.1059	-52.4597	-53.7415
0.3	-62.6831										0.2	-54.7485	-44.8303	-71.167	-70.9839	-52.2766	-53.4058
0.35	-62.4695										0.25	-54.6875	-44.6167	-71.5637	-70.8313	-52.124	-53.772
0.4	-62.5										0.3	-54.779	-44.0979	-71.5027	-71.1059	-52.3376	-53.8025
0.45	-62.561										0.35	-54.7485	-43.7317	-71.4111	-70.9534	-52.5207	-53.7109
0.5	-62.1643										0.4	-54.4434	-43.2739	-71.4111	-70.7703	-52.3682	-53.4363
0.55	-62.4695										0.45	-54.7485	-42.6025	-71.5027	-70.6787	-52.2766	-53.8025
0.6	-62.2253										0.5	-54.657	-42.2363	-71.5027	-71.0144	-52.2766	-53.8025
0.65	-62.3474										0.55	-54.5044	-41.7175	-71.228	-70.8618	-52.2156	-53.4058
0.7	-62.3474										0.6	-54.5044	-41.1072	-71.4722	-70.6787	-52.4597	-53.833
0.75	-62.0422										0.65	-54.6265	-40.1611	-71.4111	-70.7703	-52.5207	-53.6804
0.8	-62.4084										0.7	-54.6875	-38.9404	-71.2585	-70.8923	-52.5207	-53.6194
0.85	-62.2253										0.75	-54.2908	-37.323	-71.5027	-70.8008	-52.4597	-53.7415
0.9	-62.1338										0.8	-54.657	-35.1257	-71.3806	-70.4651	-52.2461	-53.4973
0.95	-62.2864										0.85	-54.6265	-32.196	-71.2891	-70.6177	-52.3071	-53.8025
1	-62.1948										0.9	-54.4739	-27.8015	-71.1975	-70.7703	-52.5513	-53.7109
1.05	-62.2864										0.95	-54.2603	-21.4233	-71.4416	-70.6482	-52.5513	-53.6804
1.1	-62.3169										1	-54.5654	-13.3362	-71.3806	-70.2515	-52.5207	-53.772
1.15	-61.8896										1.05	-54.4739	-3.69263	-71.0754	-70.404	-52.3376	-53.3447
1.2	-62.2559										1.1	-54.3213	6.56128	-71.167	-70.5261	-52.124	-53.772
1.25	-62.3474										1.15	-54.1687	16.5405	-71.2891	-70.404	-52.3987	-53.4058
1.3	-61.9812										1.2	-54.4128	26.001	-71.2585	-70.1904	-52.4902	-53.772
1.35	-62.3779										1.25	-54.3213	34.3323	-70.9228	-70.1599	-52.5207	-53.5889
1.4	-62.3169										1.3	-54.2297	41.1682	-71.2891	-70.3735	-52.4902	-53.6499
1.45	-62.1033										1.35	-54.1077	45.8679	-71.3196	-70.2209	-52.3376	-53.6804
1.5	-62.5										1.4	-54.2297	49.2859	-71.1975	-70.1294	-52.5818	-53.4363
1.55	-62.439										1.45	-54.2603	51.2085	-70.9534	-69.9158	-52.5207	-53.6499
1.6	-62.1948										1.5	-53.9551	51.3	-71.228	-70.282	-52.4597	-53.3447
1.65	-62.5915										1.55	-54.0771	50.7202	-71.2585	-70.2209	-52.2461	-53.8025
1.7	-62.561										1.6	-54.1992	49.4995	-71.1059	-70.0073	-52.6123	-53.4363
1.75	-62.1643										1.65	-54.2297	46.936	-70.9534	-69.8547	-52.5513	-53.7109
1.8	-62.5915										1.7	-54.0161	44.1284	-71.2585	-70.0378	-52.2461	-53.5889
1.85	-62.5305										1.75	-53.9246	41.1682	-71.1975	-70.1599	-52.6428	-53.6499
1.9	-62.1948										1.8	-54.1687	37.2925	-71.0144	-69.9463	-52.5818	-53.8025
1.95	-62.561										1.85	-54.1077	33.4778	-70.9839	-69.7632	-52.2461	-53.2532
2	-62.5915										1.9	-53.9551	29.3884	-71.1365	-69.7632	-52.5818	-53.6804
2.05	-62.3169										1.95	-53.833	25.1465	-71.0754	-69.9158	-52.3682	-53.5583
2.1	-62.6526										2	-53.9856	21.1487	-70.8923	-69.8852	-52.4597	-53.5278
2.15	-62.5915										2.05	-53.9246	16.449	-70.9534	-69.6716	-52.4902	-53.6804
2.2	-62.5915										2.1	-53.833	12.2375	-71.0754	-69.4275	-52.1545	-53.3447
2.25	-62.6221										2.15	-53.7109	8.02612	-70.9534	-69.6411	-52.5818	-53.6804
2.3	-62.8052										2.2	-53.9551	3.75366	-70.9228	-69.7632	-52.4902	-53.6194
2.35	-62.8357										2.25	-53.833	0.183105	-70.7092	-69.7327	-52.5818	-53.3447
2.4	-62.5										2.3	-53.8635	-4.11987	-70.9839	-69.458	-52.5818	-53.8025
2.45	-62.8357										2.35	-53.5889	-7.50732	-70.8923	-69.519	-52.3376	-53.5278
2.5	-62.8357										2.4	-53.6499	-10.9558	-70.7703	-69.6716	-52.6123	-53.5889
2.55	-62.561										2.45	-53.833	-14.4348	-70.7092	-69.6716	-52.3682	-53.6194
2.6	-62.8967										2.5	-53.833	-17.4255	-70.8313	-69.5496	-52.5513	-53.4363
2.65	-62.7441										2.55	-53.6194	-20.874	-70.8008	-69.4885	-52.4292	-53.7109
2.7	-62.7136										2.6	-53.4363	-23.5901	-70.7703	-69.3664	-52.4292	-53.7415
2.75	-62.8357										2.65	-53.7415	-26.2451	-70.4956	-69.458	-52.4597	-53.3752
2.8	-62.8967										2.7	-53.7109	-29.3274	-70.7092	-69.4275	-52.2461	-53.6499
2.85	-62.8052										2.75	-53.6804	-31.8298	-70.7397	-69.3359	-52.4902	-53.5583
2.9	-62.6526										2.8	-53.3752	-34.2102	-70.6787	-69.3054	-52.3376	-53.3142
2.95	-62.9883										2.85	-53.4363	-36.9263	-70.4651	-69.1223	-52.3071	-53.6499
3	-63.0188										2.9	-53.5889	-39.2761	-70.4651	-69.2444	-52.4597	-53.4973
3.05	-62.7136										2.95	-53.4668	-41.2598	-70.6482	-69.2749	-52.2461	-53.2837
3.1	-62.8052										3	-53.4058	-43.7927	-70.5261	-69.2749	-52.4597	-53.5889
3.15	-62.9578										3.05	-53.1921	-45.8984	-70.5261	-69.2139	-52.5818	-53.4668
3.2	-62.9272										3.1	-53.2837	-47.5769	-70.2209	-68.9697	-52.3376	-53.3447
3.25	-62.6221										3.15	-53.5889	-49.8657	-70.4651	-69.0308	-52.5818	-53.5278
3.3	-63.0493										3.2	-53.4363	-51.6052	-70.4956	-69.2749	-52.5207	-53.4058
3.35	-62.9272										3.25	-53.2837	-53.009	-70.4956	-69.2444	-52.3376	-53.4363
3.4	-62.8967										3.3	-53.1616	-54.8096	-70.343	-69.1528	-52.6733	-53.6194
3.45	-62.7747										3.35	-53.2837	-56.3049	-70.0684	-68.9392	-52.5513	-53.4668
3.5	-63.0798										3.4	-53.4973	-57.5867	-70.4346	-69.0613	-52.3987	-53.3752
3.55	-63.1409										3.45	-53.3752	-58.6548	-70.4346	-69.1833	-52.6123	-53.6194
3.6	-62.8357										3.5	-53.2837	-59.967	-70.2515	-69.0308	-52.4597	-53.4973
3.65	-63.1714										3.55	-53.1921	-61.0046	-70.1599	-68.6951	-52.3987	-53.3447
3.7	-63.0493										3.6	-53.0701	-61.5845	-69.9768	-69.0308	-52.6123	-53.5278
3.75	-63.0493										3.65	-53.3142	-62.7747	-70.2515	-68.9392	-52.5207	-53.4973
3.8	-62.7441										3.7	-53.2532	-63.5376	-70.1294	-68.634	-52.3682	-53.1921
3.85	-63.0798										3.75	-53.1616	-63.9954	-70.1599	-68.9392	-52.6428	-53.5583
3.9	-63.0798										3.8	-53.0701	-64.7583	-69.9463	-68.8476	-52.4902	-53.4973
3.95	-62.9578										3.85	-52.9175	-65.3992	-69.8852	-68.6645	-52.2766	-53.1616
4	-62.7136										3.9	-53.0395	-65.8874	-70.1294	-68.8782	-52.7649	-53.5889
4.05	-63.0493										3.95	-53.1006	-65.979	-70.0989	-68.634	-52.6123	-53.4973
4.1	-62.9883										4	-53.1616	-66.803	-70.0684	-68.7256	-52.2766	-53.1311
4.15	-62.9272										4.05	-53.0395	-67.1387	-69.9158	-68.8476	-52.7039	-53.5278
4.2	-62.5915										4.1	-52.7954	-67.2302	-69.7327	-68.6035	-52.6428	-53.5278
4.25	-63.0798										4.15	-52.7039	-67.5354	-70.0684	-68.7256	-52.3682	-53.2532
4.3	-63.0188										4.2	-52.887	-68.1457	-69.9463	-68.3899	-52.6428	-53.3447
4.35	-62.8662										4.25	-53.0701	-68.3288	-69.8547	-68.7256	-52.5818	-53.4058
4.4	-62.7136										4.3	-52.8564	-68.2678	-69.8547	-68.3899	-52.3376	-53.3142
4.45	-62.8967										4.35	-52.8259	-68.6035	-69.6411	-68.634	-52.5207	-53.2837
4.5	-62.9578										4.4	-52.7039	-68.9392	-69.5496	-68.4509	-52.7344	-53.4363
4.55	-62.8357										4.45	-52.4597	-69.0002	-69.7327	-68.5425	-52.4902	-53.2532
4.6	-62.439										4.5	-52.6428	-68.9087	-69.7327	-68.512	-52.3987	-53.0701
4.65	-62.7441										4.55	-52.7039	-69.3664	-69.5801	-68.3288	-52.7039	-53.3752
4.7	-62.8357										4.6	-52.6733	-69.5496	-69.4885	-68.3899	-52.6428	-53.3447
4.75	-62.8052										4.65	-52.6733	-69.5801	-69.3054	-68.1152	-52.3071	-53.1006
4.8	-62.6221										4.7	-52.5818	-69.4275	-69.3664	-68.2983	-52.5818	-53.2227
4.85	-62.6221										4.75	-52.3987	-69.8852	-69.6411	-68.0542	-52.7039	-53.3752
4.9	-62.9883										4.8	-52.3071	-70.0073	-69.519	-68.3594	-52.4292	-53.1921
4.95	-62.8357										4.85	-52.6428	-70.0378	-69.458	-68.0847	-52.6123	-53.0701
5	-62.5915										4.9	-52.6733	-69.9768	-69.2749	-68.2678	-52.7039	-53.3752
5.05	-62.4084										4.95	-52.5513	-70.2209	-69.1528	-68.2068	-52.6733	-53.4363
5.1	-62.7747										5	-52.6123	-70.3125	-69.3664	-67.9016	-52.5207	-53.2227
5.15	-62.7747										5.05	-52.4902	-70.2515	-69.397	-68.1457	-52.7039	-53.3752
5.2	-62.6831										5.1	-52.3682	-70.3125	-69.2444	-67.9321	-52.6123	-53.3752
5.25	-62.3779										5.15	-52.2461	-70.5566	-69.2444	-68.1763	-52.3987	-53.3447
5.3	-62.3779										5.2	-52.4902	-70.4956	-69.0308	-68.0542	-52.5513	-53.1921
5.35	-62.5915										5.25	-52.5207	-70.5261	-69.1528	-67.749	-52.7039	-53.3752
5.4	-62.5305										5.3	-52.3987	-70.4651	-69.2139	-68.0237	-52.6123	-53.2837
5.45	-62.4084										5.35	-52.2461	-70.8313	-69.0308	-67.8406	-52.2156	-53.1311
5.5	-62.1643										5.4	-52.0325	-70.7397	-68.6951	-67.9016	-52.7344	-53.2227
5.55	-62.439										5.45	-52.3071	-70.7397	-69.0918	-67.8406	-52.6428	-53.4363
5.6	-62.561										5.5	-52.2766	-70.6177	-68.9087	-67.5964	-52.5513	-53.2532
5.65	-62.3474										5.55	-52.0935	-70.8923	-68.634	-67.9016	-52.4292	-53.009
5.7	-62.3474										5.6	-52.063	-70.9839	-68.9697	-67.8101	-52.8564	-53.3447
5.75	-62.1033										5.65	-52.2461	-71.0144	-68.9087	-67.5964	-52.7954	-53.4058
5.8	-62.3169										5.7	-52.1851	-70.8923	-68.6035	-67.688	-52.4902	-53.2532
5.85	-62.4084										5.75	-51.8494	-71.0754	-68.9697	-67.5964	-52.6123	-52.948
5.9	-62.2559										5.8	-52.2156	-71.167	-68.8171	-67.6269	-52.8259	-53.4668
5.95	-62.1338										5.85	-52.1545	-71.1059	-68.7561	-67.688	-52.7649	-53.3752
6	-61.9202										5.9	-51.8799	-71.167	-68.7561	-67.4438	-52.3376	-53.3447
6.05	-62.0727										5.95	-52.2156	-70.9534	-68.4204	-67.6269	-52.6123	-53.1006
6.1	-62.1948										6	-51.8799	-71.1975	-68.7561	-67.688	-52.7954	-53.4058
6.15	-62.1033										6.05	-51.9409	-71.1975	-68.5425	-67.2607	-52.7344	-53.2837
6.2	-62.1948										6.1	-52.063	-71.1365	-68.6951	-67.5964	-52.3987	-53.1921
6.25	-62.0117										6.15	-51.5747	-70.8923	-68.6035	-67.5659	-52.7039	-53.0395
6.3	-61.8286										6.2	-52.1851	-71.0144	-68.2068	-67.2913	-52.6733	-53.2837
6.35	-62.1643										6.25	-51.8494	-71.228	-68.512	-67.4438	-52.6428	-53.2227
6.4	-62.1948										6.3	-51.8799	-71.1365	-68.2068	-67.3828	-52.3682	-53.1921
6.45	-62.2559										6.35	-51.9714	-71.1975	-68.4814	-67.1997	-52.6733	-52.9785
6.5	-62.0727										6.4	-51.6052	-70.8923	-68.2983	-67.5049	-52.6733	-53.1921
6.55	-61.8286										6.45	-51.9104	-71.0754	-68.4509	-67.2913	-52.7649	-53.2532
6.6	-61.9812										6.5	-51.6968	-71.228	-68.4814	-67.0776	-52.3987	-53.1616
6.65	-62.1033										6.55	-51.9409	-71.228	-68.1152	-67.2913	-52.6123	-52.8259
6.7	-62.1643										6.6	-51.8188	-71.167	-68.3899	-67.1997	-52.7649	-53.1616
6.75	-62.1033										6.65	-51.5137	-70.8923	-68.1152	-66.8945	-52.887	-53.2532
6.8	-61.9812										6.7	-51.7578	-71.1059	-68.4204	-67.2302	-52.6428	-53.2532
6.85	-61.8591										6.75	-51.5442	-71.2585	-68.2678	-67.1081	-52.5818	-52.9175
6.9	-61.8896										6.8	-51.7273	-71.1365	-67.9932	-67.0776	-52.7649	-53.1311
6.95	-62.0727										6.85	-51.6357	-71.0144	-68.2983	-67.2302	-52.7649	-53.3142
7	-62.0422										6.9	-51.3	-70.8008	-68.0847	-67.0471	-52.5513	-53.1921
7.05	-62.1033										6.95	-51.6052	-71.1365	-68.1457	-66.803	-52.4597	-52.9785
7.1	-62.0422										7	-51.3916	-71.167	-68.1152	-67.0776	-52.7039	-52.7954
7.15	-61.7981										7.05	-51.3306	-71.167	-67.749	-67.0471	-52.6428	-53.0395
7.2	-61.8286										7.1	-51.4221	-71.0449	-68.0847	-66.6199	-52.6123	-53.1311
7.25	-61.9812										7.15	-51.2085	-70.8313	-68.0542	-66.9556	-52.4597	-53.0395
7.3	-62.0422										7.2	-51.2695	-71.0449	-67.749	-66.8335	-52.6733	-52.7344
7.35	-61.8896										7.25	-51.3611	-71.1975	-68.0542	-66.5588	-52.8259	-52.8259
7.4	-61.7371										7.3	-51.1169	-71.0754	-67.9626	-66.8945	-52.8259	-53.1311
7.45	-61.554										7.35	-51.239	-71.167	-67.9016	-66.803	-52.6428	-52.9785
7.5	-61.9507										7.4	-51.3611	-71.0449	-67.9626	-66.4673	-52.4597	-52.8564
7.55	-61.7676										7.45	-50.9949	-70.8923	-67.8406	-66.7725	-52.7344	-52.6123
7.6	-61.676										7.5	-51.178	-71.1365	-67.7795	-66.6809	-52.8259	-53.0395
7.65	-61.676										7.55	-51.1475	-71.167	-67.9016	-66.5283	-52.8564	-53.1311
7.7	-61.8896										7.6	-50.9338	-71.0754	-67.6575	-66.5588	-52.5818	-52.887
7.75	-61.8896										7.65	-51.0559	-71.0144	-67.688	-66.7114	-52.4597	-52.8259
7.8	-61.4929										7.7	-50.9949	-70.8313	-67.8406	-66.5588	-52.7039	-52.7039
7.85	-61.9202										7.75	-50.8118	-70.7703	-67.5964	-66.3147	-52.7039	-52.8259
7.9	-61.8591										7.8	-50.8728	-71.0754	-67.5659	-66.6199	-52.7039	-52.948
7.95	-61.554										7.85	-50.9644	-71.0144	-67.5964	-66.4673	-52.3682	-52.7954
8	-61.8896										7.9	-50.7507	-71.0144	-67.4744	-66.1621	-52.4292	-52.7039
8.05	-61.7065										7.95	-50.6287	-70.9534	-67.4438	-66.4673	-52.7344	-52.4902
8.1	-61.676										8	-50.8118	-70.7703	-67.5659	-66.3452	-52.6123	-52.7954
8.15	-61.7676										8.05	-50.7507	-70.8313	-67.4438	-66.1316	-52.6733	-52.887
8.2	-61.554										8.1	-50.415	-70.9534	-67.2913	-66.1926	-52.4597	-52.8259
8.25	-61.9507										8.15	-50.7812	-71.0144	-67.5354	-66.2231	-52.4902	-52.8259
8.3	-61.7065										8.2	-50.6897	-70.9228	-67.3828	-66.2231	-52.7039	-52.5207
8.35	-61.9202										8.25	-50.4761	-70.9228	-67.0776	-65.918	-52.7039	-52.6733
8.4	-61.9202										8.3	-50.7507	-70.7703	-67.3218	-66.2842	-52.7039	-52.8564
8.45	-61.6455										8.35	-50.5676	-70.5566	-67.3828	-66.1926	-52.5818	-52.948
8.5	-62.0422										8.4	-50.4761	-70.7397	-67.0166	-65.8874	-52.4902	-52.8564
8.55	-61.7371										8.45	-50.5066	-70.9228	-67.3218	-65.918	-52.6123	-52.7039
8.6	-62.1948										8.5	-50.6592	-70.8923	-67.1387	-66.0705	-52.7344	-52.5818
8.65	-62.0422										8.55	-50.4456	-70.8008	-66.8945	-65.979	-52.7039	-52.8564
8.7	-61.8896										8.6	-50.1404	-70.6177	-67.1081	-65.5518	-52.5818	-52.7954
8.75	-62.0422										8.65	-50.5066	-70.4346	-67.1081	-65.8874	-52.5513	-52.7039
8.8	-61.676										8.7	-50.3845	-70.404	-66.8335	-65.918	-52.4292	-52.4597
8.85	-62.1338										8.75	-50.1099	-70.6787	-66.8945	-65.7043	-52.6123	-52.7649
8.9	-61.9507										8.8	-50.1099	-70.8008	-67.1081	-65.6433	-52.8259	-52.7344
8.95	-62.1338										8.85	-50.2014	-70.7092	-66.8335	-65.8264	-52.6428	-52.4902
9	-62.1643										8.9	-50.0793	-70.6787	-66.6809	-65.7349	-52.7039	-52.7649
9.05	-61.8591										8.95	-49.7436	-70.6177	-67.0166	-65.5518	-52.5513	-52.6733
9.1	-62.1643										9	-50.1099	-70.4346	-66.9861	-65.5823	-52.6428	-52.4597
9.15	-62.1338										9.05	-49.9573	-70.3125	-66.6504	-65.7349	-52.8564	-52.7954
9.2	-62.1338										9.1	-49.8047	-70.4956	-66.8335	-65.6433	-52.8259	-52.7039
9.25	-62.2253										9.15	-49.8047	-70.5872	-66.864	-65.4907	-52.7954	-52.5513
9.3	-61.9202										9.2	-49.8352	-70.5872	-66.7419	-65.6738	-52.8259	-52.7954
9.35	-62.1948										9.25	-49.7436	-70.4651	-66.6504	-65.6433	-52.6428	-52.6123
9.4	-62.1948										9.3	-49.469	-70.343	-66.8335	-65.5823	-52.5818	-52.7954
9.45	-61.9202										9.35	-49.7436	-70.1904	-66.7114	-65.3381	-52.7039	-52.6733
9.5	-62.2864										9.4	-49.5911	-70.2515	-66.4368	-65.5212	-52.887	-52.6123
9.55	-62.0422										9.45	-49.3469	-70.404	-66.6504	-65.4602	-52.8259	-52.7649
9.6	-61.7981										9.5	-49.1638	-70.282	-66.6809	-65.3381	-52.887	-52.4292
9.65	-62.2864										9.55	-49.3469	-70.1904	-66.5588	-65.155	-52.7039	-52.6428
9.7	-62.1338										9.6	-49.2859	-70.1294	-66.3452	-65.3076	-52.5818	-52.3682
9.75	-61.8896										9.65	-48.9502	-70.3125	-66.7114	-65.3992	-52.9175	-52.7039
9.8	-62.1948										9.7	-48.8892	-70.2515	-66.6199	-65.2771	-52.8564	-52.6123
9.85	-62.1338										9.75	-49.0723	-69.9158	-66.2842	-65.0635	-52.8259	-52.6428
9.9	-61.9202										9.8	-48.8586	-70.282	-66.4673	-65.2771	-52.5818	-52.6428
9.95	-62.1643										9.85	-48.7061	-70.1599	-66.6199	-65.3686	-53.0395	-52.5207
10	-62.0727										9.9	-48.6145	-69.9158	-66.5588	-65.2161	-52.9785	-52.6733
10.05	-61.9202										9.95	-48.8586	-70.2209	-66.2231	-65.094	-52.5818	-52.3682
10.1	-62.1643										10	-48.6145	-70.1904	-66.4673	-65.0635	-52.9175	-52.8259
10.15	-62.0422										10.05	-48.3093	-69.7937	-66.5283	-65.3686	-52.8564	-52.7039
10.2	-61.7981										10.1	-48.2788	-70.0684	-66.3757	-65.155	-52.6123	-52.7039
10.25	-62.1033										10.15	-48.4009	-69.9768	-66.1316	-65.0024	-52.8564	-52.7649
10.3	-61.9812										10.2	-48.3398	-69.8852	-66.3452	-64.7583	-52.7954	-52.4597
10.35	-61.7065										10.25	-47.9126	-70.0684	-66.3147	-65.0635	-52.5513	-52.8564
10.4	-62.0422										10.3	-47.821	-69.6716	-66.1316	-65.0024	-52.8259	-52.8564
10.45	-61.9812										10.35	-47.8821	-70.0378	-65.979	-64.9719	-52.7344	-52.6733
10.5	-61.7676										10.4	-47.76	-69.8852	-66.2537	-64.8193	-52.7954	-52.7954
10.55	-62.1033										10.45	-47.5159	-69.8547	-66.1316	-64.8498	-52.8259	-52.6428
10.6	-61.9202										10.5	-47.1802	-69.9158	-66.1011	-65.0024	-52.5513	-52.7954
10.65	-61.7676										10.55	-47.3938	-69.5801	-65.7654	-64.9109	-52.9175	-52.887
10.7	-61.8591										10.6	-47.3633	-70.0073	-66.1316	-64.7278	-52.6733	-52.4902
10.75	-61.9812										10.65	-47.1191	-69.8547	-66.0705	-64.5447	-52.887	-52.9175
10.8	-61.9507										10.7	-46.6003	-69.6716	-66.0095	-64.7583	-52.9175	-52.9175
10.85	-61.7676										10.75	-46.6919	-69.8852	-65.8569	-64.8193	-52.7344	-52.6428
10.9	-61.9507										10.8	-46.6309	-69.4885	-65.979	-64.7888	-52.9175	-52.9175
10.95	-61.9202										10.85	-46.4172	-69.8852	-65.918	-64.6667	-52.6123	-52.8259
11	-61.7065										10.9	-45.9595	-69.7632	-65.9485	-64.6362	-52.9785	-52.6733
11.05	-62.0117										10.95	-45.8374	-69.4275	-65.6128	-64.7278	-52.8564	-52.9175
11.1	-62.0727										11	-45.8679	-69.7021	-65.7959	-64.6973	-52.7344	-52.7344
11.15	-61.9507										11.05	-45.5933	-69.5801	-65.8569	-64.6667	-52.8259	-52.5818
11.2	-62.1033										11.1	-45.227	-69.458	-65.6738	-64.331	-52.5207	-52.887
11.25	-62.1338										11.15	-44.6777	-69.5801	-65.5212	-64.331	-52.9175	-52.7039
11.3	-62.1033										11.2	-44.6472	-69.4275	-65.5212	-64.4836	-52.7954	-52.6428
11.35	-62.0117										11.25	-44.4946	-69.397	-65.6738	-64.5752	-52.6428	-52.8259
11.4	-62.3474										11.3	-44.0674	-69.4885	-65.5823	-64.5142	-52.7344	-52.6733
11.45	-62.2559										11.35	-43.6707	-69.3664	-65.5518	-64.3616	-52.7344	-52.6428
11.5	-61.9507										11.4	-43.0908	-69.2749	-65.2771	-64.1174	-52.8564	-52.8259
11.55	-62.1033										11.45	-42.9687	-69.5496	-65.4907	-64.331	-52.887	-52.8259
11.6	-62.3779										11.5	-42.572	-69.397	-65.4907	-64.5142	-52.5818	-52.6733
11.65	-62.3169										11.55	-41.9311	-69.0918	-65.4297	-64.331	-53.009	-53.009
11.7	-62.1033										11.6	-41.1377	-69.458	-65.2771	-64.1479	-52.948	-52.887
11.75	-62.439										11.65	-40.2527	-69.3664	-65.2161	-63.9954	-52.4902	-52.6733
11.8	-62.5										11.7	-39.3982	-69.0308	-65.4602	-64.3005	-52.887	-53.009
11.85	-62.439										11.75	-38.1165	-69.3054	-65.3381	-64.3616	-52.9175	-52.887
11.9	-62.3779										11.8	-36.1938	-69.3054	-65.2466	-64.1785	-52.5818	-52.7954
11.95	-62.6526										11.85	-33.3862	-68.9087	-64.9109	-63.9038	-52.9175	-53.0701
12	-62.7136										11.9	-29.1443	-69.2139	-65.1855	-64.209	-52.8259	-53.009
12.05	-62.439										11.95	-23.468	-69.1833	-65.2771	-64.1785	-52.5818	-52.8259
12.1	-62.5915										12	-15.7471	-68.9697	-65.155	-63.9343	-52.9175	-53.1311
12.15	-62.7441										12.05	-6.28662	-68.9392	-65.0635	-64.0869	-52.8259	-53.1006
12.2	-62.7136										12.1	3.96728	-69.0918	-64.8193	-63.9954	-52.6123	-52.8259
12.25	-62.4695										12.15	14.5874	-68.9697	-65.033	-63.7512	-52.8564	-53.0701
12.3	-62.7747										12.2	24.5972	-68.8171	-65.2161	-64.0259	-52.9175	-53.2227
12.35	-62.8357										12.25	33.3252	-69.1223	-65.033	-63.8428	-52.5818	-52.948
12.4	-62.7136										12.3	40.4053	-69.0613	-64.8804	-63.7512	-52.948	-53.1311
12.45	-62.7136										12.35	46.051	-68.7866	-64.7583	-63.9343	-52.948	-53.2837
12.5	-62.9272										12.4	49.8657	-68.8171	-64.8804	-63.5376	-52.7649	-53.1921
12.55	-62.9578										12.45	52.0019	-68.9087	-65.033	-63.9038	-52.948	-53.1006
12.6	-62.9578										12.5	52.6123	-68.7561	-64.8498	-63.6291	-52.948	-53.3142
12.65	-62.8357										12.55	51.8188	-68.7256	-64.8193	-63.8123	-52.7649	-53.3447
12.7	-63.1103										12.6	50.2624	-68.9087	-64.6362	-63.7817	-52.8259	-52.948
12.75	-63.0798										12.65	47.76	-68.7866	-64.5752	-63.6291	-53.0395	-53.2837
12.8	-62.9883										12.7	44.5557	-68.512	-64.7583	-63.7207	-52.8564	-53.2227
12.85	-62.6831										12.75	41.0156	-68.634	-64.7278	-63.5376	-52.6123	-53.1006
12.9	-62.9578										12.8	37.2009	-68.7256	-64.5752	-63.6597	-52.9175	-53.1311
12.95	-63.1409										12.85	32.7148	-68.6035	-64.5142	-63.2935	-52.8564	-53.2837
13	-63.0493										12.9	27.832	-68.2983	-64.2395	-63.6291	-52.4902	-53.2837
13.05	-62.8357										12.95	23.0103	-68.5425	-64.3921	-63.2935	-53.009	-52.9175
13.1	-62.9578										13	18.219	-68.6035	-64.4531	-63.5681	-52.887	-53.2837
13.15	-63.1714										13.05	13.4583	-68.4509	-64.5447	-63.385	-52.8259	-53.3447
13.2	-62.9883										13.1	8.8501	-68.2678	-64.4836	-63.3545	-52.7344	-53.1616
13.25	-62.9578										13.15	4.3335	-68.573	-64.27	-63.446	-52.9785	-53.1311
13.3	-62.8357										13.2	0.0610352	-68.4814	-64.0564	-63.1714	-52.9175	-53.4058
13.35	-63.2019										13.25	-4.36401	-68.1763	-64.27	-63.3545	-52.6428	-53.3752
13.4	-63.0493										13.3	-8.36182	-68.3288	-64.4836	-63.0493	-52.9785	-53.1311
13.45	-62.9883										13.35	-12.2986	-68.4509	-64.27	-63.4155	-52.887	-53.1616
13.5	-62.8662										13.4	-15.8386	-68.4204	-64.209	-63.2629	-52.6428	-53.3142
13.55	-62.9578										13.45	-19.2261	-68.0542	-64.0259	-63.2019	-52.7649	-53.2837
13.6	-63.0798										13.5	-22.3999	-68.2068	-63.9343	-63.2019	-52.9175	-53.0701
13.65	-63.0188										13.55	-25.4211	-68.2983	-64.1785	-62.9272	-52.8564	-53.3142
13.7	-62.8662										13.6	-28.595	-68.2373	-64.0564	-63.2935	-52.4902	-53.1921
13.75	-62.8052										13.65	-31.6162	-67.9321	-63.9038	-63.1714	-52.887	-53.1006
13.8	-62.9883										13.7	-34.3323	-68.2068	-63.9038	-62.9883	-52.8259	-52.9175
13.85	-63.0493										13.75	-37.0483	-68.1457	-64.1174	-63.0493	-52.7344	-53.3447
13.9	-63.0188										13.8	-39.3066	-68.1152	-63.9343	-62.9272	-52.7344	-53.2227
13.95	-62.9883										13.85	-42.0837	-67.8101	-63.7512	-62.9578	-52.9785	-53.0395
14	-62.8357										13.9	-44.5862	-68.0237	-64.1174	-63.0493	-53.009	-53.1311
14.05	-63.0188										13.95	-46.7224	-68.1457	-63.9038	-62.5915	-52.7039	-53.3142
14.1	-62.9272										14	-48.6755	-68.0847	-63.7817	-62.9883	-52.8564	-53.2227
14.15	-62.9883										14.05	-50.9644	-67.8711	-64.0259	-63.0188	-53.0395	-53.0701
14.2	-62.8052										14.1	-52.7039	-67.8711	-63.7512	-62.6831	-53.0701	-53.1311
14.25	-62.7136										14.15	-54.2297	-67.9932	-63.9954	-62.9578	-52.8259	-53.3447
14.3	-62.8357										14.2	-56.1218	-67.9626	-63.8123	-62.8357	-52.9785	-53.2227
14.35	-62.8967										14.25	-57.6782	-67.8406	-63.5986	-62.7441	-53.0701	-53.0701
14.4	-62.8967										14.3	-58.5937	-67.5964	-63.8733	-63.0188	-52.9175	-53.0395
14.45	-62.6831										14.35	-60.1196	-67.8406	-63.4766	-62.7441	-52.7954	-53.3447
14.5	-62.561										14.4	-61.2488	-67.7795	-63.8428	-62.7441	-53.1311	-53.1921
14.55	-62.7441										14.45	-61.8896	-67.5659	-63.5986	-62.8662	-53.0395	-53.1006
14.6	-62.8967										14.5	-63.1103	-67.3828	-63.7207	-62.5915	-53.0395	-53.009
14.65	-62.8052										14.55	-63.6597	-67.5659	-63.5681	-62.7441	-52.7344	-53.2837
14.7	-62.7136										14.6	-64.4226	-67.5964	-63.5681	-62.6526	-53.009	-53.2532
14.75	-62.5305										14.65	-65.033	-67.5354	-63.6291	-62.4084	-53.1006	-53.1921
14.8	-62.5915										14.7	-65.3076	-67.3523	-63.2324	-62.6831	-53.009	-52.948
14.85	-62.7441										14.75	-66.1621	-67.3523	-63.5681	-62.6526	-52.8564	-53.2532
14.9	-62.6831										14.8	-66.4062	-67.5354	-63.2019	-62.2559	-53.0395	-53.3142
14.95	-62.6221										14.85	-66.7419	-67.5964	-63.5376	-62.561	-53.1006	-53.1921
15	-62.4695										14.9	-67.2302	-67.4438	-63.2935	-62.6221	-53.1311	-53.1311
15.05	-62.4084										14.95	-67.3523	-67.0471	-63.4155	-62.1948	-52.948	-53.1006
15.1	-62.561										15	-67.9321	-67.3218	-63.324	-62.5305	-53.1006	-53.4058
15.15	-62.8052										15.05	-68.1763	-67.3828	-63.0798	-62.5	-53.2227	-53.1616
15.2	-62.7136										15.1	-68.1763	-67.3218	-63.2324	-62.3169	-53.1311	-53.1616
15.25	-62.7441										15.15	-68.6951	-67.1387	-63.1409	-62.5	-52.9785	-53.009
15.3	-62.6221										15.2	-68.8171	-66.8945	-63.1409	-62.3474	-52.887	-53.1616
15.35	-62.4084										15.25	-68.8171	-67.2302	-63.2019	-62.0422	-53.1921	-53.2837
15.4	-62.6831										15.3	-69.1833	-67.1997	-62.7747	-62.3779	-53.0701	-53.1921
15.45	-62.7747										15.35	-69.2749	-67.1387	-63.1103	-62.3169	-53.0701	-53.0395
15.5	-62.9272										15.4	-69.2444	-66.8945	-62.9578	-62.1338	-52.9175	-52.9175
15.55	-62.7747										15.45	-69.6411	-66.6809	-62.9272	-62.1643	-53.1006	-53.2227
15.6	-62.561										15.5	-69.5801	-67.1081	-63.0188	-62.1643	-53.1616	-53.1921
15.65	-62.2864										15.55	-69.6411	-67.0166	-62.6221	-62.1033	-53.1921	-53.1006
15.7	-62.5915										15.6	-69.8242	-66.8945	-63.0798	-61.9507	-53.1006	-53.1006
15.75	-62.7136										15.65	-69.7937	-66.7419	-63.0188	-62.1643	-52.9785	-52.9175
15.8	-62.6831										15.7	-69.8242	-66.6504	-62.5915	-62.0117	-53.0701	-53.2227
15.85	-62.4695										15.75	-70.0989	-66.8945	-62.9578	-61.8591	-53.1006	-53.2227
15.9	-62.5										15.8	-70.0989	-66.864	-62.8357	-62.1643	-53.1616	-53.2532
15.95	-62.7441										15.85	-69.8547	-66.864	-62.6526	-61.9812	-52.9175	-53.1311
16	-62.6221										15.9	-70.3125	-66.7419	-62.8052	-61.6455	-52.9175	-52.887
16.05	-62.439										15.95	-70.3125	-66.5588	-62.5915	-62.0422	-53.0701	-53.1921
16.1	-62.7136										16	-69.9463	-66.5893	-62.5	-62.0422	-53.009	-53.2532
16.15	-62.6831										16.05	-70.282	-66.6199	-62.6221	-61.6455	-52.9785	-53.1616
16.2	-62.4084										16.1	-70.3125	-66.6809	-62.561	-61.7676	-52.7649	-53.0395
16.25	-62.5915										16.15	-70.2209	-66.5588	-62.439	-61.8591	-52.9785	-52.8564
16.3	-62.6221										16.2	-70.282	-66.4368	-62.5	-61.676	-53.0701	-52.948
16.35	-62.3779										16.25	-70.404	-66.3147	-62.4084	-61.5845	-53.0395	-53.1311
16.4	-62.7136										16.3	-70.404	-66.3757	-62.3474	-61.8591	-52.9785	-52.9785
16.45	-62.5915										16.35	-70.0378	-66.5588	-62.561	-61.7371	-52.7344	-52.9785
16.5	-62.3474										16.4	-70.4956	-66.4368	-62.2864	-61.4014	-52.8259	-52.7649
16.55	-62.5										16.45	-70.404	-66.4368	-62.3169	-61.615	-53.1311	-52.8564
16.6	-62.1948										16.5	-70.1904	-66.3147	-62.4084	-61.676	-53.0701	-52.948
16.65	-62.5915										16.55	-70.3125	-66.1926	-62.1643	-61.4624	-53.0701	-53.009
16.7	-62.4084										16.6	-70.5261	-66.4368	-62.2559	-61.4624	-52.9175	-52.948
16.75	-62.4695										16.65	-70.4651	-66.4368	-62.2864	-61.676	-52.8259	-53.009
16.8	-62.5305										16.7	-70.2209	-66.2842	-62.1338	-61.5234	-53.1311	-52.887
16.85	-62.0727										16.75	-70.5261	-66.3147	-61.9812	-61.1877	-53.1311	-52.7039
16.9	-62.3779										16.8	-70.4651	-66.2537	-62.2864	-61.4929	-53.009	-53.0701
16.95	-62.1338										16.85	-70.2515	-65.9485	-62.1033	-61.5234	-53.009	-53.009
17	-62.4695										16.9	-70.0989	-66.0705	-61.9812	-61.3098	-52.8259	-52.9785
17.05	-62.4084										16.95	-70.4651	-66.1926	-62.1643	-61.1267	-52.9785	-52.7954
17.1	-62.1948										17	-70.404	-66.2231	-61.9507	-61.3403	-53.1006	-53.009
17.15	-62.2864										17.05	-70.1294	-66.0705	-61.676	-61.1877	-53.0701	-53.0395
17.2	-62.0727										17.1	-70.1599	-66.04	-62.0728	-61.0046	-53.1006	-52.8564
17.25	-62.3474										17.15	-70.2515	-65.8569	-61.9812	-60.9741	-53.009	-52.7954
17.3	-62.2559										17.2	-70.1904	-65.6738	-61.615	-61.1267	-52.8259	-53.1006
17.35	-62.2864										17.25	-69.8852	-65.7959	-61.9812	-61.0657	-52.887	-52.9785
17.4	-62.3779										17.3	-70.1599	-65.979	-61.9202	-60.6995	-53.2532	-53.0395
17.45	-62.1033										17.35	-70.0989	-65.8569	-61.7371	-60.9741	-53.1311	-53.1311
17.5	-62.3779										17.4	-70.1904	-65.8874	-61.7371	-61.0046	-53.0395	-52.887
17.55	-62.3169										17.45	-69.8547	-65.7959	-61.7981	-60.9436	-53.0701	-53.0701
17.6	-62.1338										17.5	-70.2209	-65.6128	-61.7065	-60.73	-52.8564	-53.1616
17.65	-62.3779										17.55	-70.0989	-65.4602	-61.7371	-60.8826	-53.009	-52.887
17.7	-62.2253										17.6	-70.0684	-65.6433	-61.8286	-60.9436	-53.1311	-53.1616
17.75	-62.1643										17.65	-69.9463	-65.8264	-61.5845	-60.852	-53.1311	-52.9785
17.8	-62.2864										17.7	-70.1904	-65.5518	-61.2793	-60.6079	-53.1311	-53.1616
17.85	-62.1033										17.75	-70.1599	-65.3992	-61.615	-60.791	-53.0701	-53.009
17.9	-62.2559										17.8	-70.0684	-65.155	-61.5845	-60.7605	-52.9785	-52.9175
17.95	-62.3169										17.85	-69.8547	-65.3686	-61.2793	-60.791	-52.8564	-53.009
18	-61.9812										17.9	-70.2515	-65.3992	-61.3708	-60.3638	-53.1616	-52.7039
18.05	-62.3779										17.95	-70.0989	-65.2466	-61.5234	-60.6384	-53.1921	-53.1006
18.1	-62.3169										18	-70.0684	-65.0024	-61.3708	-60.6689	-53.1311	-52.7954
18.15	-62.0117										18.05	-69.9158	-65.3686	-61.0962	-60.5164	-52.7954	-53.1311
18.2	-62.3169										18.1	-70.1294	-65.1855	-61.3708	-60.3638	-53.009	-52.948
18.25	-62.2864										18.15	-70.0684	-64.9109	-61.3708	-60.3638	-53.3142	-53.1006
18.3	-62.0422										18.2	-70.0073	-65.2466	-61.2183	-60.6079	-53.2227	-53.1616
18.35	-62.2253										18.25	-69.8547	-65.1855	-61.1572	-60.4248	-52.8259	-52.8564
18.4	-62.1948										18.3	-70.0684	-64.9719	-61.3098	-60.3332	-53.1311	-53.1921
18.45	-62.0117										18.35	-70.1294	-65.094	-61.2488	-60.2722	-53.1921	-52.948
18.5	-62.2253										18.4	-70.0378	-64.9109	-60.9436	-60.3943	-52.887	-53.2227
18.55	-62.2253										18.45	-69.7937	-65.094	-61.1877	-60.3638	-53.1311	-53.1311
18.6	-62.0727										18.5	-69.9768	-65.0635	-61.0962	-60.2722	-53.1311	-52.9175
18.65	-62.0727										18.55	-69.9768	-64.6057	-60.9741	-60.0281	-52.7344	-53.1921
18.7	-62.2864										18.6	-69.8852	-64.9719	-60.8215	-60.2112	-53.1616	-52.948
18.75	-62.1643										18.65	-69.7632	-64.6973	-61.1572	-60.2417	-52.9175	-53.2227
18.8	-62.0422										18.7	-69.6106	-64.7888	-60.9741	-60.1807	-52.948	-53.2227
18.85	-62.2864										18.75	-69.9463	-64.8804	-60.8215	-59.906	-53.009	-52.948
18.9	-62.2559										18.8	-69.8547	-64.5752	-60.791	-59.967	-52.6428	-53.2532
18.95	-62.0422										18.85	-69.7632	-64.7278	-60.9131	-60.1501	-53.0395	-53.2532
19	-62.2559										18.9	-69.5801	-64.6057	-60.9131	-59.9976	-52.8564	-53.0701
19.05	-62.1338										18.95	-69.5496	-64.7583	-60.5774	-60.0281	-52.9175	-53.3447
19.1	-61.8591										19	-69.7632	-64.6973	-60.7605	-59.8144	-53.1311	-53.3142
19.15	-62.0727										19.05	-69.6716	-64.4531	-60.8826	-59.906	-52.8259	-53.4363
19.2	-62.0422										19.1	-69.6716	-64.6667	-60.73	-60.0586	-53.0701	-53.4058
19.25	-61.8896										19.15	-69.397	-64.4531	-60.4858	-59.9365	-52.8564	-53.1616
19.3	-61.9507										19.2	-69.519	-64.6057	-60.6079	-59.8755	-53.1921	-53.5278
19.35	-62.0727										19.25	-69.7632	-64.4836	-60.73	-59.5398	-53.1006	-53.5278
19.4	-61.9812										19.3	-69.6411	-64.1479	-60.5469	-59.7229	-52.887	-53.1921
19.45	-61.7676										19.35	-69.5801	-64.5447	-60.3027	-59.906	-53.0701	-53.5278
19.5	-62.0727										19.4	-69.3054	-64.3921	-60.4553	-59.845	-52.7344	-53.5583
19.55	-62.0727										19.45	-69.4275	-64.0869	-60.5164	-59.7534	-53.1921	-53.2532
19.6	-61.7981										19.5	-69.5496	-64.4226	-60.4858	-59.4177	-53.0701	-53.6804
19.65	-61.8286										19.55	-69.458	-64.1785	-60.3638	-59.6313	-52.7954	-53.5278
19.7	-61.8591										19.6	-69.397	-64.1174	-60.2722	-59.6619	-53.1616	-53.3142
19.75	-61.8896										19.65	-69.0613	-64.27	-60.5469	-59.6619	-52.8259	-53.6804
19.8	-61.615										19.7	-69.3054	-64.1479	-60.4248	-59.5398	-53.1006	-53.6804
19.85	-61.8896										19.75	-69.519	-64.1785	-60.3638	-59.3262	-53.0701	-53.3752
19.9	-61.8286										19.8	-69.3664	-64.2395	-60.1196	-59.4482	-52.7344	-53.7415
19.95	-61.615										19.85	-69.2444	-64.0259	-60.4248	-59.5703	-53.1921	-53.8025
20	-61.8286										19.9	-69.0308	-64.0564	-60.3943	-59.5398	-53.0701	-53.4363
20.05	-61.9507										19.95	-69.1833	-64.3005	-60.2417	-59.4482	-52.7954	-53.772
20.1	-61.9507										20	-69.3664	-64.0564	-60.0281	-59.2651	-53.1921	-53.7415
20.15	-61.676										20.05	-69.2139	-63.8733	-60.1807	-59.5398	-53.2227	-53.5278
20.2	-62.0727										20.1	-69.1833	-64.1479	-60.2417	-59.4788	-52.8259	-53.833
20.25	-62.0422										20.15	-69.0308	-63.9648	-60.2417	-59.3262	-53.1616	-53.833
20.3	-61.9202										20.2	-68.9087	-63.8428	-59.9976	-59.2041	-53.1006	-53.5583
20.35	-61.7981										20.25	-69.0918	-64.1479	-59.906	-59.5093	-52.7344	-53.8025
20.4	-62.1033										20.3	-69.0918	-63.9648	-60.0586	-59.2957	-53.2532	-53.833
20.45	-62.0727										20.35	-68.9697	-63.6902	-60.1196	-59.0515	-53.1616	-53.6804
20.5	-61.8591										20.4	-69.0308	-64.0259	-60.0586	-59.3567	-52.8564	-53.6804
20.55	-61.7676										20.45	-68.7561	-63.9648	-59.8144	-59.2041	-53.1921	-53.894
20.6	-62.1033										20.5	-68.7866	-63.6597	-59.9365	-59.2651	-53.0701	-53.772
20.65	-61.9812										20.55	-68.9087	-63.8123	-60.1196	-59.3567	-52.8564	-53.6194
20.7	-61.8591										20.6	-68.9697	-63.9343	-59.9976	-58.8684	-53.2227	-53.894
20.75	-61.9812										20.65	-68.8782	-63.6902	-59.906	-59.2957	-53.1311	-53.8635
20.8	-62.1338										20.7	-68.8171	-63.4766	-59.7534	-59.0515	-52.9785	-53.6804
20.85	-62.1948										20.75	-68.6645	-63.7512	-59.8755	-59.2346	-53.1006	-53.894
20.9	-62.0727										20.8	-68.6035	-63.7512	-59.906	-59.1125	-53.1616	-53.9246
20.95	-62.0727										20.85	-68.7866	-63.4155	-59.906	-59.0515	-53.0395	-53.772
21	-62.3169										20.9	-68.7866	-63.6902	-59.845	-59.1125	-53.1616	-53.8635
21.05	-62.3169										20.95	-68.7256	-63.5681	-59.5703	-58.8379	-53.2227	-54.0161
21.1	-62.2253										21	-68.7256	-63.385	-59.6008	-59.021	-53.1006	-53.8635
21.15	-62.1033										21.05	-68.6035	-63.4155	-59.8144	-58.6853	-52.887	-53.6499
21.2	-62.3474										21.1	-68.4814	-63.5376	-59.6924	-59.082	-53.3142	-54.0771
21.25	-62.2559										21.15	-68.4814	-63.446	-59.6313	-58.6548	-53.2837	-54.0466
21.3	-62.1338										21.2	-68.634	-63.1103	-59.4482	-58.96	-52.8564	-53.772
21.35	-62.0727										21.25	-68.573	-63.4766	-59.3872	-58.6548	-53.1311	-53.894
21.4	-62.3169										21.3	-68.512	-63.1714	-59.6313	-58.9294	-53.1616	-53.9551
21.45	-62.2864										21.35	-68.4204	-63.1714	-59.6619	-58.7769	-53.0395	-53.9856
21.5	-62.3169										21.4	-68.2373	-63.0798	-59.4788	-58.8074	-53.0701	-53.6804
21.55	-62.0422										21.45	-68.1763	-63.3545	-59.3567	-58.8379	-53.2532	-54.1077
21.6	-62.2864										21.5	-68.2678	-63.2019	-59.1736	-58.7463	-53.1616	-53.9551
21.65	-62.3779										21.55	-68.4204	-62.9272	-59.4482	-58.8379	-52.948	-53.894
21.7	-62.439										21.6	-68.4509	-63.0798	-59.6924	-58.5327	-53.2227	-53.894
21.75	-62.2559										21.65	-68.4204	-63.0798	-59.3872	-58.8074	-53.2532	-53.9856
21.8	-62.1033										21.7	-68.3899	-63.1409	-59.3567	-58.5632	-53.009	-53.9856
21.85	-62.2864										21.75	-68.2068	-62.7136	-59.2041	-58.8684	-53.1311	-53.7109
21.9	-62.3169										21.8	-67.9932	-62.9883	-59.2041	-58.7158	-53.3752	-54.0161
21.95	-62.2559										21.85	-68.0542	-62.9578	-59.4177	-58.5937	-53.1616	-53.9551
22	-62.0727										21.9	-68.2678	-62.8357	-59.2957	-58.7158	-52.9175	-53.8635
22.05	-62.1643										21.95	-68.2678	-62.6831	-59.0515	-58.4106	-53.1616	-53.6804
22.1	-62.4084										22	-68.1457	-62.9272	-59.021	-58.6853	-53.1616	-53.9246
22.15	-62.439										22.05	-67.9932	-62.8357	-59.2651	-58.5022	-53.0701	-53.9246
22.2	-62.2559										22.1	-67.8101	-62.6831	-59.1736	-58.4106	-52.9175	-53.8025
22.25	-62.0117										22.15	-68.1152	-62.5915	-58.8684	-58.5327	-53.2837	-53.6804
22.3	-62.3169										22.2	-67.9932	-62.8052	-59.2957	-58.2275	-53.1921	-54.1077
22.35	-62.439										22.25	-67.9016	-62.7441	-59.0515	-58.5327	-53.1006	-53.9856
22.4	-62.4084										22.3	-67.7795	-62.6526	-58.8989	-58.4412	-53.1616	-53.9856
22.45	-62.2253										22.35	-68.0237	-62.5305	-59.1125	-58.2581	-53.3142	-53.833
22.5	-62.0117										22.4	-67.9016	-62.7136	-58.96	-58.5327	-53.4058	-54.2603
22.55	-62.3474										22.45	-67.5964	-62.5915	-59.1736	-58.2886	-53.1006	-54.0771
22.6	-62.4084										22.5	-67.9932	-62.5	-59.021	-58.3191	-53.3447	-53.9246
22.65	-62.4084										22.55	-67.8711	-62.3169	-58.7463	-58.4106	-53.4058	-53.833
22.7	-62.3474										22.6	-67.5049	-62.561	-59.021	-58.1665	-53.4363	-54.1992
22.75	-62.1948										22.65	-67.8711	-62.439	-58.7158	-58.3496	-53.2532	-54.2297
22.8	-62.3169										22.7	-67.7795	-62.4084	-58.9905	-58.3496	-53.3752	-53.9856
22.85	-62.5										22.75	-67.688	-62.1948	-58.7158	-58.0444	-53.4058	-53.7109
22.9	-62.439										22.8	-67.7185	-62.5	-58.8074	-58.3191	-53.4058	-54.1687
22.95	-62.5										22.85	-67.4133	-62.3779	-58.8074	-58.2275	-53.0701	-54.0466
23	-62.439										22.9	-67.8101	-62.3474	-58.5632	-57.9529	-53.4668	-54.0771
23.05	-62.2864										22.95	-67.6269	-62.0117	-58.7463	-58.197	-53.4973	-53.7109
23.1	-62.5										23	-67.5659	-62.2864	-58.5022	-58.1055	-53.3447	-53.9551
23.15	-62.5915										23.05	-67.6269	-62.4695	-58.8684	-58.0749	-53.1616	-54.1077
23.2	-62.5305										23.1	-67.3218	-62.2559	-58.5327	-58.0749	-53.3447	-54.0771
23.25	-62.5305										23.15	-67.7185	-62.2559	-58.7769	-57.7698	-53.4668	-53.833
23.3	-62.439										23.2	-67.5354	-62.0728	-58.5937	-58.0749	-53.3142	-53.8635
23.35	-62.4084										23.25	-67.4133	-62.2559	-58.6243	-58.1055	-53.1311	-54.1687
23.4	-62.6221										23.3	-67.4438	-62.2253	-58.6853	-57.8003	-53.2837	-54.1077
23.45	-62.7441										23.35	-67.2302	-62.1338	-58.3191	-58.0749	-53.4058	-54.0466
23.5	-62.5915										23.4	-67.5659	-61.8896	-58.6243	-58.0444	-53.3752	-53.833
23.55	-62.6221										23.45	-67.3523	-62.0117	-58.4412	-57.8003	-53.3142	-54.1992
23.6	-62.5										23.5	-67.1081	-62.1033	-58.5937	-57.9834	-53.1616	-54.2297
23.65	-62.6221										23.55	-67.4438	-61.9812	-58.6243	-57.8918	-53.4363	-54.1382
23.7	-62.8052										23.6	-67.2607	-61.8591	-58.1665	-57.6477	-53.2532	-53.9551
23.75	-62.8357										23.65	-67.2302	-61.676	-58.4717	-57.9834	-53.2532	-53.9551
23.8	-62.7136										23.7	-67.1997	-61.9507	-58.3801	-57.9224	-52.887	-54.2603
23.85	-62.8052										23.75	-66.925	-61.9202	-58.4106	-57.5256	-53.2837	-54.2603
23.9	-62.6831										23.8	-67.1387	-61.8896	-58.4412	-57.8003	-53.3447	-54.1992
23.95	-62.5915										23.85	-67.1387	-61.676	-58.1055	-57.7698	-53.2837	-53.9551
24	-62.8052										23.9	-66.7725	-61.5845	-58.5022	-57.4951	-53.1921	-54.1077
24.05	-62.8052										23.95	-67.0776	-61.7981	-58.4106	-57.8003	-53.009	-54.2297
24.1	-62.8357										24	-67.0776	-61.8591	-58.136	-57.6477	-53.3447	-54.2908
24.15	-62.6526										24.05	-66.6809	-61.7981	-58.4717	-57.5256	-53.3752	-54.2908
24.2	-62.5915										24.1	-66.9861	-61.6455	-58.2886	-57.7087	-53.3447	-54.0466
24.25	-62.8357										24.15	-66.9556	-61.5234	-58.2581	-57.6477	-53.1616	-54.1687
24.3	-62.8662										24.2	-66.5893	-61.7371	-58.2275	-57.373	-53.0395	-54.3213
24.35	-62.5										24.25	-67.0166	-61.8591	-58.1055	-57.6782	-53.2837	-54.3823
24.4	-62.7136										24.3	-66.7725	-61.676	-58.197	-57.6477	-53.2837	-54.4128
24.45	-62.7747										24.35	-66.5588	-61.5234	-58.197	-57.312	-53.2227	-54.2297
24.5	-62.6831										24.4	-66.7419	-61.2793	-58.0139	-57.5256	-52.9785	-54.1077
24.55	-62.8052										24.45	-66.7419	-61.4624	-58.136	-57.6172	-53.009	-54.3823
24.6	-62.7441										24.5	-66.5588	-61.5845	-58.0749	-57.4341	-53.1616	-54.4128
24.65	-62.5										24.55	-66.4978	-61.4624	-57.8003	-57.4036	-53.1006	-54.3213
24.7	-62.7747										24.6	-66.6199	-61.4014	-58.0444	-57.4951	-53.1616	-54.2603
24.75	-62.7747										24.65	-66.4368	-61.3098	-57.9834	-57.373	-52.8564	-54.0466
24.8	-62.5305										24.7	-66.2231	-61.1267	-57.6477	-57.251	-52.948	-54.2603
24.85	-62.7747										24.75	-66.5283	-61.3098	-58.0749	-57.4036	-53.1921	-54.5349
24.9	-62.5915										24.8	-66.4368	-61.4014	-58.0139	-57.4341	-53.2227	-54.4434
24.95	-62.9272										24.85	-66.1926	-61.4014	-57.6477	-57.0679	-53.1616	-54.4739
25	-62.7747										24.9	-66.4062	-61.3098	-57.9529	-57.4951	-53.1006	-54.3518
25.05	-62.6526										24.95	-66.2842	-61.0657	-57.9834	-57.3425	-53.0395	-54.2908
25.1	-62.7747										25	-66.2231	-61.0352	-57.6477	-57.1289	-53.2837	-54.5349
25.15	-62.5915										25.05	-66.2842	-61.2793	-57.8918	-57.2205	-53.2837	-54.6265
25.2	-62.9272										25.1	-66.4062	-61.3098	-57.7698	-57.3425	-53.2227	-54.5959
25.25	-62.7136										25.15	-66.1926	-61.1572	-57.5256	-57.1899	-53.3142	-54.5349
25.3	-62.8357										25.2	-66.0095	-61.0352	-57.8308	-56.8237	-53.1006	-54.3823
25.35	-62.8662										25.25	-66.2842	-60.9436	-57.7698	-57.0984	-53.1311	-54.5044
25.4	-62.6526										25.3	-66.1926	-60.791	-57.373	-57.1289	-53.3447	-54.5959
25.45	-62.8357										25.35	-65.979	-60.9741	-57.5867	-56.8848	-53.3142	-54.5959
25.5	-62.561										25.4	-65.979	-61.0657	-57.6782	-57.0373	-53.3752	-54.3213
25.55	-62.8967										25.45	-66.1011	-60.8826	-57.4646	-57.0373	-53.2532	-54.6265
25.6	-62.8662										25.5	-66.0095	-61.0046	-57.4951	-56.8848	-53.1921	-54.5654
25.65	-62.6526										25.55	-65.7349	-60.8215	-57.6172	-56.7322	-53.0701	-54.4739
25.7	-62.8052										25.6	-65.979	-60.6689	-57.5561	-57.0068	-53.4668	-54.6265
25.75	-62.6221										25.65	-65.8264	-60.6995	-57.4341	-56.9458	-53.4668	-54.5959
25.8	-62.8967										25.7	-65.8264	-60.9436	-57.6172	-56.7932	-53.3752	-54.4434
25.85	-62.8967										25.75	-65.5823	-60.9131	-57.5256	-56.8542	-53.3447	-54.7485
25.9	-62.4695										25.8	-66.0095	-60.73	-57.1899	-57.0373	-53.2532	-54.657
25.95	-62.8662										25.85	-65.7959	-60.7605	-57.5867	-56.8542	-53.2532	-54.5654
26	-62.7441										25.9	-65.6738	-60.6689	-57.5561	-56.5491	-53.3447	-54.6875
26.05	-62.6221										25.95	-65.7654	-60.4248	-57.251	-56.8542	-53.4668	-54.5349
26.1	-62.8052										26	-65.7654	-60.6079	-57.4646	-56.9458	-53.4363	-54.8096
26.15	-62.6526										26.05	-65.7654	-60.6689	-57.3425	-56.7322	-53.4058	-54.6875
26.2	-62.6526										26.1	-65.4297	-60.6079	-57.3425	-56.5186	-53.3752	-54.657
26.25	-62.8357										26.15	-65.7349	-60.3943	-57.1899	-56.9458	-53.0701	-54.6875
26.3	-62.561										26.2	-65.6433	-60.3638	-57.2815	-56.7932	-53.3447	-54.3518
26.35	-62.7441										26.25	-65.4602	-60.5164	-57.2815	-56.7627	-53.5278	-54.779
26.4	-62.7747										26.3	-65.2161	-60.4858	-56.8848	-56.5796	-53.4668	-54.5654
26.45	-62.561										26.35	-65.4907	-60.2722	-57.251	-56.7932	-53.3752	-54.8096
26.5	-62.7747										26.4	-65.4602	-60.4248	-57.1594	-56.8237	-53.1616	-54.6265
26.55	-62.6526										26.45	-65.2771	-60.3638	-57.0679	-56.6406	-53.5889	-54.6875
26.6	-62.439										26.5	-65.033	-60.1196	-57.0373	-56.5491	-53.5278	-54.8096
26.65	-62.7441										26.55	-65.3992	-60.3943	-57.1594	-56.8542	-53.2837	-54.5654
26.7	-62.7747										26.6	-65.3381	-60.3638	-57.0679	-56.8237	-53.4973	-54.9011
26.75	-62.3779										26.65	-65.2771	-59.9365	-56.7627	-56.7322	-53.5278	-54.7485
26.8	-62.6221										26.7	-65.0024	-60.3332	-57.0373	-56.5186	-53.4058	-54.9011
26.85	-62.561										26.75	-65.3381	-60.2417	-57.0068	-56.8542	-53.5278	-54.9316
26.9	-62.5										26.8	-65.3076	-60.0586	-56.8237	-56.7627	-53.5278	-54.6265
26.95	-62.6831										26.85	-65.155	-60.1807	-56.6406	-56.5796	-53.1921	-54.9622
27	-62.6526										26.9	-64.9414	-59.8755	-56.9458	-56.427	-53.5889	-54.7485
27.05	-62.5305										26.95	-65.1245	-60.2112	-56.8848	-56.6406	-53.4668	-54.8706
27.1	-62.6526										27	-65.1855	-60.0586	-56.488	-56.6711	-53.3752	-54.8706
27.15	-62.8662										27.05	-65.155	-59.967	-56.6711	-56.5491	-53.4973	-54.5044
27.2	-62.7136										27.1	-64.7888	-59.9976	-56.7932	-56.366	-53.2532	-54.9622
27.25	-62.439										27.15	-64.8804	-59.6313	-56.7322	-56.488	-53.6194	-54.8096
27.3	-62.8052										27.2	-65.094	-59.9976	-56.366	-56.6101	-53.3752	-54.7485
27.35	-62.7136										27.25	-64.9719	-59.8144	-56.6406	-56.5491	-53.4363	-54.8706
27.4	-62.4695										27.3	-64.8193	-59.8755	-56.7627	-56.3354	-53.6804	-54.8401
27.45	-62.7747										27.35	-64.6667	-59.7839	-56.5796	-56.3049	-53.2837	-54.8096
27.5	-62.8052										27.4	-64.9719	-59.6619	-56.2439	-56.6101	-53.6499	-54.8706
27.55	-62.561										27.45	-64.9109	-59.9365	-56.5796	-56.4575	-53.3142	-54.6875
27.6	-62.7136										27.5	-64.8498	-59.7534	-56.6101	-56.427	-53.7109	-54.9927
27.65	-62.7441										27.55	-64.6362	-59.6924	-56.488	-56.0913	-53.5889	-54.9927
27.7	-62.7136										27.6	-64.7583	-59.845	-56.1218	-56.366	-53.5583	-54.5959
27.75	-62.7441										27.65	-64.9414	-59.5703	-56.427	-56.427	-53.5889	-54.9316
27.8	-62.9883										27.7	-64.6973	-59.6924	-56.427	-56.4575	-53.3142	-54.9011
27.85	-62.8357										27.75	-64.6973	-59.6619	-56.366	-56.2134	-53.6804	-54.7485
27.9	-62.6221										27.8	-64.4836	-59.3262	-56.1218	-56.1218	-53.4363	-55.0232
27.95	-63.0188										27.85	-64.6667	-59.6924	-56.2744	-56.3965	-53.4668	-54.9316
28	-62.9578										27.9	-64.7888	-59.5398	-56.3049	-56.3049	-53.5583	-54.6875
28.05	-62.8357										27.95	-64.6973	-59.1431	-56.3049	-56.2744	-53.3447	-55.0537
28.1	-62.7136										28	-64.5142	-59.5398	-55.9387	-56.0303	-53.5889	-55.0232
28.15	-62.9578										28.05	-64.3616	-59.3872	-56.2744	-55.9692	-53.5583	-54.779
28.2	-62.9578										28.1	-64.6362	-59.2346	-56.1829	-56.3049	-53.3447	-55.0232
28.25	-62.6526										28.15	-64.6667	-59.4788	-56.2744	-56.0913	-53.7109	-55.1453
28.3	-63.0188										28.2	-64.5447	-59.3262	-55.9692	-56.1218	-53.4058	-54.8401
28.35	-62.9272										28.25	-64.4836	-59.1125	-56.0608	-55.9082	-53.5278	-55.0232
28.4	-62.9272										28.3	-64.27	-59.3262	-56.2744	-56.0303	-53.5583	-55.0537
28.45	-62.8357										28.35	-64.4226	-59.2957	-56.2439	-56.2744	-53.3752	-54.9927
28.5	-63.0188										28.4	-64.5752	-58.96	-56.0913	-55.9998	-53.7109	-55.1453
28.55	-63.0493										28.45	-64.4836	-59.3262	-55.8166	-55.7861	-53.5889	-55.0842
28.6	-62.9578										28.5	-64.4226	-59.2957	-56.0303	-56.0303	-53.3447	-55.0232
28.65	-63.0188										28.55	-64.2395	-58.8989	-56.1218	-56.0913	-53.6194	-54.9622
28.7	-63.0493										28.6	-64.27	-59.2041	-55.9998	-55.8472	-53.5583	-55.1758
28.75	-63.0188										28.65	-64.3921	-59.1431	-55.8166	-55.8166	-53.2837	-55.1147
28.8	-62.8662										28.7	-64.331	-59.082	-55.8472	-55.9387	-53.5889	-54.779
28.85	-62.9272										28.75	-64.331	-59.1125	-55.9387	-55.6946	-53.5278	-55.1147
28.9	-63.0798										28.8	-64.1479	-59.0515	-55.8472	-55.8777	-53.2532	-55.1453
28.95	-63.0798										28.85	-63.9954	-59.0515	-55.7251	-55.9082	-53.6499	-54.8401
29	-62.7441										28.9	-64.1479	-58.8684	-55.5115	-55.481	-53.6194	-55.1147
29.05	-63.1409										28.95	-64.2395	-59.1125	-55.7251	-55.9692	-53.2532	-55.1147
29.1	-63.1714										29	-64.1785	-58.96	-55.8472	-55.603	-53.7109	-55.0537
29.15	-63.0798										29.05	-64.1174	-58.6243	-55.8472	-55.8472	-53.5889	-55.0842
29.2	-62.8662										29.1	-63.9343	-59.082	-55.7251	-55.7251	-53.3142	-55.2978
29.25	-63.2019										29.15	-63.9343	-58.96	-55.481	-55.603	-53.5889	-55.1147
29.3	-63.2629										29.2	-64.0869	-58.8074	-55.7861	-55.8777	-53.6499	-54.9622
29.35	-63.0798										29.25	-64.1174	-58.7769	-55.7861	-55.4504	-53.4973	-55.3284
29.4	-62.8662										29.3	-63.9648	-59.021	-55.6335	-55.7861	-53.5278	-55.1453
29.45	-63.2019										29.35	-63.9954	-58.9294	-55.542	-55.481	-53.5889	-54.9622
29.5	-63.2629										29.4	-63.6902	-58.6243	-55.4504	-55.8472	-53.4973	-55.2063
29.55	-63.2629										29.45	-63.6291	-58.9294	-55.542	-55.4199	-53.4973	-55.1758
29.6	-62.9883										29.5	-63.9038	-58.7769	-55.7251	-55.7556	-53.6499	-55.1147
29.65	-63.0798										29.55	-63.9038	-58.6548	-55.5115	-55.5115	-53.4973	-54.9316
29.7	-63.3545										29.6	-63.8733	-58.7463	-55.3894	-55.542	-53.2837	-55.2368
29.75	-63.2324										29.65	-63.7512	-58.7463	-55.1758	-55.5725	-53.6804	-55.2978
29.8	-63.1409										29.7	-63.6291	-58.6853	-55.3589	-55.5115	-53.5583	-54.9011
29.85	-63.0798										29.75	-63.4155	-58.3801	-55.603	-55.4504	-53.3447	-55.1758
29.9	-63.446										29.8	-63.4766	-58.6853	-55.3894	-55.3589	-53.6194	-55.2368
29.95	-63.446										29.85	-63.7512	-58.5937	-55.481	-55.481	-53.6194	-55.2673
30	-63.2019										29.9	-63.7817	-58.4717	-55.3589	-55.1147	-53.4363	-55.0232
30.05	-63.0188										29.95	-63.6597	-58.4412	-55.0842	-55.3894	-53.4058	-55.2673
30.1	-63.324										30	-63.6597	-58.5632	-55.3894	-55.2063	-53.6194	-55.2368
30.15	-63.385										30.05	-63.4766	-58.5022	-55.5115	-55.4504	-53.5278	-55.1453
30.2	-63.3545										30.1	-63.324	-58.2886	-55.5115	-55.2978	-53.2837	-55.0842
30.25	-63.1409										30.15	-63.4766	-58.3801	-55.1758	-55.1758	-53.4973	-55.3284
30.3	-63.0493										30.2	-63.6597	-58.5632	-54.9927	-55.2978	-53.4973	-55.2673
30.35	-63.324										30.25	-63.5681	-58.3801	-55.2978	-54.9316	-53.1616	-55.1147
30.4	-63.1714										30.3	-63.4766	-58.0444	-55.2368	-55.2368	-53.3752	-55.0842
30.45	-63.1714										30.35	-63.385	-58.2581	-55.0232	-55.0842	-53.4668	-55.3589
30.5	-62.9272										30.4	-63.1714	-58.3191	-55.1147	-55.0232	-53.3142	-55.2063
30.55	-63.1409										30.45	-63.385	-58.197	-55.0842	-55.1147	-53.1006	-54.9622
30.6	-63.2629										30.5	-63.3545	-57.8308	-54.9927	-54.8401	-53.4668	-55.0537
30.65	-63.0188										30.55	-63.2629	-58.0139	-54.9011	-55.0537	-53.4058	-55.2673
30.7	-62.9883										30.6	-62.9578	-58.197	-54.9927	-54.9316	-53.2227	-55.1758
30.75	-62.8357										30.65	-63.324	-58.1055	-54.7485	-54.7485	-53.2532	-54.8401
30.8	-62.9578										30.7	-63.324	-57.8003	-55.1147	-55.0537	-53.4363	-55.1758
30.85	-63.0188										30.75	-62.9578	-58.0444	-54.9927	-54.8096	-53.4058	-55.2368
30.9	-62.8662										30.8	-63.2935	-58.1055	-54.718	-54.9011	-53.009	-55.1147
30.95	-62.8967										30.85	-63.2629	-57.9529	-55.0232	-54.9622	-53.3447	-54.9927
31	-62.5915										30.9	-62.8662	-57.7087	-54.718	-54.779	-53.3142	-54.9622
31.05	-62.7136										30.95	-63.2019	-57.8308	-55.0232	-54.9011	-53.3447	-55.1758
31.1	-62.9272										31	-63.1409	-57.9224	-54.8096	-54.8096	-53.0701	-55.0537
31.15	-62.8662										31.05	-62.8967	-57.9834	-54.6875	-54.5654	-53.3447	-54.9011
31.2	-62.8357										31.1	-63.0493	-57.5867	-54.8096	-54.9316	-53.3447	-54.8706
31.25	-62.6221										31.15	-62.8052	-57.7087	-54.5044	-54.657	-53.1921	-55.1147
31.3	-62.5305										31.2	-63.0188	-57.8613	-54.718	-54.5044	-53.1311	-55.0232
31.35	-62.7136										31.25	-62.9578	-57.6782	-54.4128	-54.7485	-53.2837	-54.9316
31.4	-62.8357										31.3	-62.6831	-57.6172	-54.657	-54.5044	-53.2227	-54.718
31.45	-62.6526										31.35	-62.8357	-57.4341	-54.5349	-54.6265	-53.1921	-54.9927
31.5	-62.5915										31.4	-62.439	-57.6477	-54.657	-54.5959	-53.009	-55.0232
31.55	-62.2559										31.45	-62.8357	-57.6477	-54.4739	-54.2908	-53.3447	-54.9927
31.6	-62.4084										31.5	-62.6831	-57.4951	-54.4128	-54.5959	-53.3142	-54.779
31.65	-62.561										31.55	-62.5	-57.1899	-54.6265	-54.4739	-53.2227	-54.9011
31.7	-62.5305										31.6	-62.6526	-57.4646	-54.2603	-54.1077	-53.1311	-55.0842
31.75	-62.4695										31.65	-62.4695	-57.6172	-54.5044	-54.5044	-53.3752	-54.9622
31.8	-62.3169										31.7	-62.7441	-57.5256	-54.0771	-54.5044	-53.3142	-54.8706
31.85	-62.2253										31.75	-62.561	-57.2205	-54.5044	-54.1077	-53.2837	-54.657
31.9	-62.2559										31.8	-62.4695	-57.0984	-54.4434	-54.4128	-53.1006	-54.9927
31.95	-62.439										31.85	-62.5915	-57.373	-54.1687	-54.3823	-53.3447	-55.0232
32	-62.4084										31.9	-62.3474	-57.373	-54.3518	-54.0161	-53.3142	-54.9927
32.05	-62.4695										31.95	-62.4695	-57.312	-54.0771	-54.3823	-53.2532	-54.8706
32.1	-62.3169										32	-62.3779	-57.0679	-54.3518	-54.3213	-52.948	-54.6875
32.15	-62.1338										32.05	-62.0728	-57.0984	-54.2908	-53.9246	-53.3142	-54.9927
32.2	-62.1643										32.1	-62.4084	-57.312	-53.9856	-54.3518	-53.2532	-54.9316
32.25	-62.4084										32.15	-62.3474	-57.251	-54.2603	-54.1992	-53.2227	-54.9622
32.3	-62.3169										32.2	-62.0422	-57.1289	-54.1687	-53.894	-53.1006	-54.8401
32.35	-62.3474										32.25	-62.2559	-56.8237	-54.1687	-54.1992	-53.0701	-54.6875
32.4	-62.1033										32.3	-62.2253	-57.0679	-54.1687	-54.0161	-53.4363	-54.9622
32.45	-61.9507										32.35	-61.9507	-57.1289	-53.9246	-53.8635	-53.3447	-54.9622
32.5	-62.3169										32.4	-62.2253	-57.0984	-54.1992	-54.1077	-53.2837	-55.0537
32.55	-62.2253										32.45	-62.0117	-57.0373	-54.1992	-54.0771	-53.0701	-54.8706
32.6	-62.0422										32.5	-61.8896	-56.8848	-53.772	-53.7109	-53.2837	-54.6875
32.65	-61.8896										32.55	-62.1948	-56.8542	-54.1382	-54.0771	-53.2837	-54.9927
32.7	-62.2253										32.6	-61.9812	-57.0373	-53.9856	-54.0466	-53.3752	-55.0842
32.75	-62.1948										32.65	-61.676	-57.0068	-53.772	-53.6194	-53.2532	-54.9927
32.8	-61.7676										32.7	-62.0728	-57.0068	-53.9551	-53.894	-53.1311	-54.8706
32.85	-62.0117										32.75	-62.0117	-56.8542	-53.8025	-53.8635	-53.4058	-54.5959
32.9	-61.9507										32.8	-61.5234	-56.6711	-53.8025	-53.6499	-53.3447	-54.8706
32.95	-61.615										32.85	-61.8896	-56.7932	-53.7415	-53.7109	-53.3142	-54.9927
33	-61.9812										32.9	-61.8286	-56.9153	-53.5583	-53.6499	-53.0701	-54.9927
33.05	-61.7676										32.95	-61.615	-56.7627	-53.5583	-53.5583	-53.1006	-54.9011
33.1	-61.7065										33	-61.7371	-56.7932	-53.6194	-53.4668	-53.3447	-54.8096
33.15	-61.8591										33.05	-61.7065	-56.488	-53.4363	-53.6804	-53.3447	-54.7485
33.2	-61.4929										33.1	-61.5845	-56.5186	-53.4973	-53.5278	-53.3142	-54.8706
33.25	-61.9202										33.15	-61.554	-56.8542	-53.5278	-53.1921	-53.0701	-55.1453
33.3	-61.7065										33.2	-61.7371	-56.7932	-53.3142	-53.6499	-53.1616	-54.9316
33.35	-61.8591										33.25	-61.554	-56.6101	-53.4363	-53.4973	-53.4973	-55.0537
33.4	-61.7981										33.3	-61.3708	-56.5796	-53.4668	-53.2837	-53.4058	-54.8706
33.45	-61.4624										33.35	-61.7371	-56.3965	-53.1616	-53.4058	-53.3142	-54.8401
33.5	-61.9202										33.4	-61.676	-56.427	-53.3142	-53.4363	-53.0701	-55.1147
33.55	-61.676										33.45	-61.1572	-56.5186	-53.3447	-53.3447	-53.1921	-55.1147
33.6	-61.8286										33.5	-61.4929	-56.5491	-53.1006	-53.1006	-53.4973	-55.0842
33.65	-61.7981										33.55	-61.554	-56.427	-53.1616	-53.3142	-53.3142	-54.8096
33.7	-61.676										33.6	-61.3403	-56.3965	-53.1921	-53.3447	-53.3142	-54.9316
33.75	-61.7371										33.65	-61.1267	-56.2439	-53.0395	-52.9785	-53.1311	-55.0842
33.8	-61.554										33.7	-61.4319	-56.1218	-52.948	-53.1921	-53.009	-55.0232
33.85	-61.8286										33.75	-61.4624	-56.2439	-53.1921	-53.1616	-53.1921	-54.6875
33.9	-61.7676										33.8	-61.0352	-56.3049	-52.948	-53.009	-53.2837	-55.0232
33.95	-61.7371										33.85	-61.3403	-56.2439	-52.7344	-52.9175	-53.1616	-54.9927
34	-61.9202										33.9	-61.2183	-56.1829	-53.0395	-53.1311	-53.1921	-54.6875
34.05	-61.676										33.95	-61.1877	-56.0303	-52.9175	-53.0395	-53.009	-55.0537
34.1	-61.9202										34	-61.1267	-55.9387	-52.6428	-52.6123	-52.9785	-54.9622
34.15	-61.9507										34.05	-61.2793	-55.9692	-53.009	-52.948	-53.3142	-54.657
34.2	-61.7676										34.1	-61.1572	-56.1523	-52.9785	-53.009	-53.3447	-55.1147
34.25	-61.9812										34.15	-61.0046	-56.2134	-52.7344	-52.8564	-53.2532	-54.8401
34.3	-61.8286										34.2	-61.1267	-56.1523	-52.8564	-52.5207	-53.1921	-54.9316
34.35	-61.7981										34.25	-61.2183	-56.1523	-52.8259	-52.9175	-53.1006	-54.9622
34.4	-61.8591										34.3	-61.0352	-55.8166	-52.6428	-52.8564	-53.0701	-54.6875
34.45	-61.554										34.35	-60.8215	-55.7251	-52.7649	-52.7039	-53.3447	-54.9622
34.5	-61.9507										34.4	-61.0657	-56.0608	-52.7954	-52.6428	-53.3752	-54.6265
34.55	-61.9202										34.45	-61.0657	-55.9387	-52.6428	-52.887	-53.1616	-54.9316
34.6	-61.615										34.5	-60.852	-55.8166	-52.4597	-52.8564	-53.1616	-54.7485
34.65	-62.0727										34.55	-60.5469	-55.542	-52.7344	-52.6733	-52.9785	-54.8401
34.7	-61.8896										34.6	-60.9436	-55.8166	-52.6123	-52.6123	-53.0701	-54.8096
34.75	-61.6455										34.65	-60.791	-55.7861	-52.3071	-52.8259	-53.2532	-54.657
34.8	-61.9507										34.7	-60.73	-55.603	-52.6428	-52.7954	-53.2532	-54.779
34.85	-61.9507										34.75	-60.4858	-55.6335	-52.6428	-52.4902	-53.1006	-54.5959
34.9	-61.7065										34.8	-60.7605	-55.6946	-52.4597	-52.6123	-53.009	-54.8096
34.95	-61.9202										34.85	-60.73	-55.6335	-52.4292	-52.7649	-53.1616	-54.5044
35	-61.8896										34.9	-60.5774	-55.6335	-52.5207	-52.7649	-53.1311	-54.8706
35.05	-61.554										34.95	-60.3638	-55.6335	-52.5207	-52.5207	-52.948	-54.657
35.1	-61.9202										35	-60.73	-55.3894	-52.2766	-52.5513	-53.2227	-54.7485
35.15	-61.9202										35.05	-60.6995	-55.7861	-52.3682	-52.7649	-53.1006	-54.8401
35.2	-61.5234										35.1	-60.5469	-55.6946	-52.3376	-52.6733	-52.7649	-54.5044
35.25	-61.7981										35.15	-60.3332	-55.3589	-52.2461	-52.5207	-53.1616	-54.8401
35.3	-61.9507										35.2	-60.5469	-55.5725	-52.124	-52.3682	-52.9175	-54.5959
35.35	-61.6455										35.25	-60.5164	-55.3284	-52.3376	-52.5818	-52.9175	-54.779
35.4	-61.7981										35.3	-60.4858	-55.603	-52.1545	-52.5818	-52.9175	-54.7485
35.45	-61.8896										35.35	-60.1196	-55.5115	-51.8188	-52.3376	-52.6123	-54.3823
35.5	-61.7676										35.4	-60.3638	-55.3284	-52.063	-52.1851	-52.9785	-54.718
35.55	-61.8591										35.45	-60.3332	-55.481	-52.124	-52.3987	-52.8259	-54.6265
35.6	-61.8896										35.5	-60.3332	-55.1453	-52.0019	-52.4292	-52.7954	-54.5959
35.65	-61.8286										35.55	-60.0281	-55.5115	-51.6968	-52.3682	-52.7954	-54.657
35.7	-61.7065										35.6	-60.1807	-55.2978	-52.0935	-51.9714	-52.6428	-54.4434
35.75	-61.8896										35.65	-60.2112	-55.2368	-52.063	-52.2461	-52.8564	-54.718
35.8	-61.9202										35.7	-60.1807	-55.4199	-51.8494	-52.3071	-52.7039	-54.6265
35.85	-61.5234										35.75	-60.0281	-54.9927	-51.6052	-52.3682	-52.8564	-54.2908
35.9	-61.8896										35.8	-59.906	-55.3589	-52.0325	-52.063	-52.9175	-54.8096
35.95	-61.9202										35.85	-60.0891	-55.2673	-51.8188	-51.9409	-52.7344	-54.5959
36	-61.7065										35.9	-60.1501	-55.2673	-51.6357	-52.2461	-52.8564	-54.4128
36.05	-61.8286										35.95	-60.0891	-55.3284	-51.4832	-52.2461	-52.4597	-54.6265
36.1	-62.0117										36	-59.7534	-54.9316	-51.6968	-52.1545	-52.7954	-54.5959
36.15	-61.9507										36.05	-59.906	-55.2978	-51.5747	-51.8188	-52.7039	-54.5654
36.2	-61.7981										36.1	-60.0891	-55.2368	-51.4832	-51.9104	-52.7039	-54.5654
36.25	-62.0422										36.15	-59.967	-55.0232	-51.2695	-52.124	-52.7344	-54.4434
36.3	-61.9812										36.2	-59.845	-55.2978	-51.3916	-52.0019	-52.3987	-54.6265
36.35	-61.7981										36.25	-59.5398	-55.0232	-51.4221	-52.0019	-52.7344	-54.5654
36.4	-62.0117										36.3	-59.7839	-54.8706	-51.3	-51.5747	-52.5207	-54.3518
36.45	-62.0117										36.35	-59.8755	-55.1758	-51.0864	-51.8188	-52.5207	-54.6265
36.5	-61.8896										36.4	-59.7229	-54.9622	-51.239	-51.8494	-52.6733	-54.5349
36.55	-61.7065										36.45	-59.6313	-54.8096	-51.3306	-51.8188	-52.4597	-54.4739
36.6	-62.1033										36.5	-59.4177	-54.9927	-51.2695	-51.6968	-52.6428	-54.657
36.65	-61.9812										36.55	-59.7229	-54.9316	-50.8423	-51.6052	-52.6733	-54.6265
36.7	-61.8591										36.6	-59.7534	-54.6875	-51.0559	-51.8494	-52.3376	-54.4434
36.75	-61.9507										36.65	-59.6619	-54.9011	-51.2085	-51.8494	-52.7954	-54.6875
36.8	-62.2253										36.7	-59.5398	-54.8096	-51.0864	-51.7578	-52.7344	-54.6875
36.85	-62.1338										36.75	-59.3567	-54.657	-50.8118	-51.4832	-52.3376	-54.2908
36.9	-61.9202										36.8	-59.6313	-54.9316	-50.8728	-51.8188	-52.7344	-54.5654
36.95	-62.1643										36.85	-59.5703	-54.718	-51.0254	-51.8799	-52.6428	-54.6265
37	-62.2559										36.9	-59.5093	-54.4739	-50.8728	-51.4526	-52.3987	-54.4434
37.05	-62.2253										36.95	-59.4788	-54.779	-50.8118	-51.5747	-52.7039	-54.5349
37.1	-61.9507										37	-59.2041	-54.7485	-50.5676	-51.6968	-52.4597	-54.5349
37.15	-62.2864										37.05	-59.2957	-54.3518	-50.7507	-51.3916	-52.3071	-54.3823
37.2	-62.1643										37.1	-59.3872	-54.657	-50.8423	-51.7273	-52.6733	-54.4739
37.25	-62.1643										37.15	-59.3567	-54.6875	-50.6592	-51.5137	-52.5818	-54.6265
37.3	-62.0117										37.2	-59.3872	-54.2908	-50.4761	-51.3	-52.3071	-54.4739
37.35	-62.3474										37.25	-59.1431	-54.5959	-50.354	-51.6052	-52.5513	-54.3213
37.4	-62.3169										37.3	-58.9905	-54.5349	-50.6897	-51.178	-52.5513	-54.6875
37.45	-62.2864										37.35	-59.1736	-54.3213	-50.5981	-51.5747	-52.3376	-54.5044
37.5	-62.1948										37.4	-59.4482	-54.4128	-50.4456	-51.3611	-52.5513	-54.3518
37.55	-62.439										37.45	-59.2346	-54.5349	-50.2319	-51.3916	-52.5207	-54.657
37.6	-62.4084										37.5	-59.1736	-54.4434	-50.3845	-51.3611	-52.3071	-54.657
37.65	-62.3169										37.55	-59.082	-54.2908	-50.5066	-51.1169	-52.5818	-54.2908
37.7	-62.2559										37.6	-58.96	-54.5349	-50.3235	-51.3	-52.4597	-54.6265
37.75	-62.5305										37.65	-59.2041	-54.5044	-50.2014	-51.0559	-52.2156	-54.5654
37.8	-62.4084										37.7	-59.1431	-54.1992	-49.9573	-51.239	-52.5207	-54.4739
37.85	-62.3474										37.75	-59.082	-54.3518	-49.9878	-50.8423	-52.4292	-54.5349
37.9	-62.2559										37.8	-59.1125	-54.4128	-50.2319	-51.1475	-52.2156	-54.5349
37.95	-62.5305										37.85	-58.8684	-54.2603	-50.0488	-50.8118	-52.3682	-54.5044
38	-62.5										37.9	-58.6853	-54.0771	-49.8352	-51.1169	-52.4292	-54.2297
38.05	-62.439										37.95	-58.7769	-54.2603	-49.6826	-50.8728	-52.2766	-54.657
38.1	-62.2864										38	-58.9905	-54.2908	-49.6216	-50.9949	-52.3376	-54.5959
38.15	-62.5										38.05	-58.8684	-53.9246	-49.7742	-50.8423	-52.5207	-54.3823
38.2	-62.5915										38.1	-58.8989	-54.1077	-49.7436	-50.9033	-52.3376	-54.4434
38.25	-62.561										38.15	-58.8074	-54.1687	-49.6521	-50.8728	-52.1545	-54.657
38.3	-62.439										38.2	-58.5327	-54.0161	-49.469	-50.8118	-52.5513	-54.5044
38.35	-62.3474										38.25	-58.6548	-53.9856	-49.2248	-50.8728	-52.3987	-54.2908
38.4	-62.5305										38.3	-58.7463	-54.1992	-49.3774	-50.6592	-52.1545	-54.6875
38.45	-62.439										38.35	-58.7769	-54.0771	-49.408	-50.9949	-52.4902	-54.718
38.5	-62.4084										38.4	-58.7463	-53.8635	-49.2554	-50.5981	-52.4597	-54.4434
38.55	-62.1643										38.45	-58.6853	-53.894	-48.9807	-50.9033	-52.1851	-54.4128
38.6	-62.3474										38.5	-58.6853	-54.1382	-48.7061	-50.7812	-52.1545	-54.657
38.65	-62.439										38.55	-58.4717	-54.0161	-49.0417	-50.7202	-52.4902	-54.5654
38.7	-62.3474										38.6	-58.5022	-53.7109	-48.8586	-50.7202	-52.3376	-54.2603
38.75	-62.3474										38.65	-58.6548	-53.894	-48.7366	-50.4456	-52.063	-54.657
38.8	-62.2253										38.7	-58.6548	-53.9856	-48.4924	-50.7507	-52.2461	-54.5654
38.85	-62.4084										38.75	-58.5937	-53.9246	-48.7061	-50.5371	-52.2461	-54.3518
38.9	-62.4695										38.8	-58.2886	-53.4973	-48.5535	-50.4456	-52.2766	-54.3823
38.95	-62.4695										38.85	-58.5022	-53.833	-48.1873	-50.4456	-52.0935	-54.657
39	-62.3169										38.9	-58.5937	-53.9246	-48.4924	-50.1709	-52.3987	-54.5959
39.05	-62.2559										38.95	-58.4717	-53.772	-48.1873	-50.5066	-52.3376	-54.4128
39.1	-62.4695										39	-58.1055	-53.5583	-48.0652	-50.3235	-52.0935	-54.5349
39.15	-62.439										39.05	-58.4717	-53.833	-48.1567	-50.0793	-52.2461	-54.718
39.2	-62.439										39.1	-58.4717	-53.8635	-47.7295	-50.293	-52.3376	-54.6265
39.25	-62.2864										39.15	-58.0444	-53.772	-47.9126	-50.1099	-52.3376	-54.4434
39.3	-62.1643										39.2	-58.4412	-53.4973	-47.7295	-50.2014	-52.063	-54.5959
39.35	-62.4084										39.25	-58.3496	-53.8635	-47.5159	-50.2014	-52.3376	-54.8096
39.4	-62.5										39.3	-58.197	-53.894	-47.5159	-49.7742	-52.2766	-54.657
39.45	-62.4084										39.35	-58.4106	-53.9551	-46.936	-50.1709	-52.0935	-54.3823
39.5	-62.3169										39.4	-58.136	-53.4668	-47.2412	-50.0183	-51.9714	-54.5044
39.55	-62.1948										39.45	-58.136	-53.8025	-46.6919	-49.7742	-52.2766	-54.6265
39.6	-62.3779										39.5	-58.197	-53.8025	-46.875	-49.9268	-52.2156	-54.5349
39.65	-62.561										39.55	-57.8308	-53.772	-46.5698	-49.8352	-52.0019	-54.2908
39.7	-62.3474										39.6	-58.136	-53.4973	-46.3867	-49.8047	-52.0019	-54.4128
39.75	-62.2864										39.65	-57.9529	-53.6804	-46.2341	-49.8657	-52.2461	-54.657
39.8	-62.1948										39.7	-58.0139	-53.7109	-45.7764	-49.6216	-52.2461	-54.5959
39.85	-62.1033										39.75	-58.1055	-53.6194	-45.8374	-49.7131	-52.0325	-54.3518
39.9	-62.3474										39.8	-57.6782	-53.4973	-45.166	-49.8047	-51.9714	-54.3213
39.95	-62.3474										39.85	-58.1055	-53.4668	-45.2881	-49.3164	-52.2766	-54.6875
40	-62.2559										39.9	-57.6782	-53.6499	-44.7388	-49.7131	-52.1851	-54.5349
40.05	-62.2253										39.95	-58.0444	-53.7109	-44.5862	-49.6216	-51.8799	-54.4434
40.1	-62.0422										40	-57.9224	-53.5889	-44.1284	-49.3774	-51.9714	-54.2297
40.15	-62.0422										40.05	-57.5867	-53.2532	-43.7317	-49.7436	-52.2461	-54.5959
40.2	-62.3169										40.1	-57.9224	-53.5278	-43.396	-49.53	-52.124	-54.5349
40.25	-62.3474										40.15	-57.7393	-53.7109	-42.4499	-49.408	-51.9409	-54.4739
40.3	-62.2559										40.2	-57.9224	-53.5889	-42.2363	-49.5911	-51.8188	-54.2297
40.35	-62.1948										40.25	-57.8003	-53.4363	-41.3818	-49.469	-52.0935	-54.3823
40.4	-62.0727										40.3	-57.4951	-53.3142	-40.5884	-49.3469	-52.0019	-54.5349
40.45	-62.0117										40.35	-57.8003	-53.5583	-39.6423	-49.3774	-51.9714	-54.5349
40.5	-62.1643										40.4	-57.6782	-53.5583	-38.0249	-49.2554	-51.7273	-54.3213
40.55	-62.0727										40.45	-57.4646	-53.4668	-36.5295	-49.1638	-51.9714	-54.1077
40.6	-61.7065										40.5	-57.6477	-53.2837	-33.9966	-49.3469	-52.0935	-54.4739
40.65	-61.4014										40.55	-57.4341	-53.2532	-30.0598	-49.1638	-51.8799	-54.4434
40.7	-61.0046										40.6	-57.373	-53.4973	-24.7803	-49.0723	-51.7883	-54.3823
40.75	-60.5164										40.65	-57.6172	-53.3752	-17.334	-49.2859	-51.9104	-54.3213
40.8	-60.1501										40.7	-57.4036	-53.3142	-8.72803	-49.0723	-52.0935	-54.3213
40.85	-59.6313										40.75	-57.373	-53.009	0.976562	-49.0112	-51.9714	-54.5959
40.9	-59.021										40.8	-57.5867	-53.1921	11.5051	-49.1638	-51.7883	-54.5044
40.95	-58.136										40.85	-57.312	-53.3447	21.0266	-49.0723	-51.6968	-54.4739
41	-57.8308										40.9	-57.312	-53.1921	29.8462	-48.9502	-51.9409	-54.3213
41.05	-57.0984										40.95	-57.4341	-53.2227	37.4145	-49.0723	-52.0019	-54.4128
41.1	-56.1523										41	-57.4036	-52.887	42.8772	-48.9197	-51.8188	-54.5044
41.15	-55.7556										41.05	-57.2205	-53.009	47.0276	-48.8281	-51.6052	-54.4434
41.2	-54.9316										41.1	-57.312	-53.1006	49.7742	-48.9502	-51.7273	-54.5349
41.25	-53.9246										41.15	-57.2205	-53.0395	50.5371	-48.8586	-51.9409	-54.3213
41.3	-53.4973										41.2	-57.0679	-53.009	50.5066	-48.5229	-51.9409	-54.3518
41.35	-52.7344										41.25	-57.2815	-52.7954	49.8962	-48.8281	-51.8494	-54.4739
41.4	-51.6663										41.3	-57.1594	-52.6428	47.7295	-48.6755	-51.5747	-54.5349
41.45	-51.1475										41.35	-56.7932	-52.8564	45.3491	-48.3704	-51.8494	-54.4739
41.5	-50.0793										41.4	-57.0373	-52.887	42.8772	-48.584	-51.9409	-54.3213
41.55	-49.4995										41.45	-57.0373	-52.7954	39.2456	-48.4924	-51.8799	-54.1687
41.6	-48.5229										41.5	-56.7017	-52.7649	35.7666	-48.1567	-51.9714	-54.5349
41.65	-47.2412										41.55	-57.0068	-52.5818	32.2876	-48.2483	-51.6968	-54.6875
41.7	-46.4477										41.6	-56.9153	-52.6123	28.1372	-48.1567	-51.9104	-54.5959
41.75	-44.8914										41.65	-56.8237	-52.9175	24.1394	-47.9431	-51.9714	-54.4128
41.8	-43.7927										41.7	-56.7017	-52.7954	20.1721	-47.9431	-52.0019	-54.2908
41.85	-41.5039										41.75	-56.9153	-52.7649	15.9607	-48.0652	-52.0019	-54.4128
41.9	-38.6047										41.8	-56.7932	-52.6733	11.6577	-47.7905	-51.8494	-54.657
41.95	-34.1797										41.85	-56.5796	-52.4597	7.93457	-47.4853	-51.7578	-54.5349
42	-27.4353										41.9	-56.8542	-52.5818	4.15039	-47.76	-51.9104	-54.4434
42.05	-19.104										41.95	-56.7322	-52.6123	0	-47.6685	-51.9409	-54.2908
42.1	-8.5144										42	-56.5186	-52.5818	-3.479	-47.2412	-51.8494	-54.5654
42.15	2.31934										42.05	-56.6406	-52.6123	-6.74438	-47.3328	-51.8188	-54.4739
42.2	13.4888										42.1	-56.7627	-52.3987	-10.4065	-47.3328	-51.5442	-54.1382
42.25	24.0173										42.15	-56.6711	-52.2766	-13.4888	-47.1191	-51.7578	-54.3518
42.3	32.2266										42.2	-56.2744	-52.0935	-16.3574	-46.9055	-51.9409	-54.4128
42.35	38.3911										42.25	-56.6101	-52.3376	-19.5618	-47.1497	-51.8188	-54.1687
42.4	41.1377										42.3	-56.5186	-52.3987	-22.3694	-47.0276	-51.8188	-54.4128
42.45	41.1072										42.35	-56.366	-52.2461	-24.9023	-46.6919	-51.6663	-54.4739
42.5	38.4827										42.4	-56.366	-52.2766	-27.6184	-46.814	-51.6968	-54.1992
42.55	32.196										42.45	-56.5186	-52.063	-30.3345	-46.7529	-51.8494	-54.5044
42.6	24.5361										42.5	-56.3965	-52.0325	-32.7454	-46.5393	-51.8799	-54.2603
42.65	15.1367										42.55	-56.0913	-52.0325	-34.8206	-46.2646	-51.8494	-54.3518
42.7	4.18091										42.6	-56.3049	-52.1851	-37.5671	-46.5393	-51.8188	-54.4739
42.75	-6.5918										42.65	-56.3049	-52.124	-39.7949	-46.2646	-51.6663	-54.1992
42.8	-17.7612										42.7	-56.1829	-52.124	-41.7175	-45.9595	-51.4832	-54.5044
42.85	-28.9307										42.75	-55.9998	-52.0019	-43.8843	-45.8374	-51.6663	-54.1382
42.9	-39.093										42.8	-56.2439	-51.8188	-46.1731	-45.8679	-51.8494	-54.4739
42.95	-48.6145										42.85	-56.1523	-52.0325	-47.9126	-45.6238	-51.7578	-54.3213
43	-57.4646										42.9	-56.0608	-52.0019	-49.469	-45.1965	-51.7578	-54.3518
43.05	-65.0635										42.95	-55.8472	-51.7883	-51.4221	-45.227	-51.4832	-54.3823
43.1	-71.7468										43	-56.1829	-51.8494	-53.0395	-45.105	-51.6052	-54.1992
43.15	-77.6062										43.05	-56.0913	-51.9104	-54.3823	-44.9219	-51.8799	-54.5044
43.2	-82.2754										43.1	-55.8777	-51.7578	-55.6641	-44.4336	-51.8188	-54.0161
43.25	-85.9375										43.15	-55.9387	-51.6968	-57.1594	-44.4336	-51.5747	-54.4434
43.3	-89.447										43.2	-56.0913	-51.8799	-58.2275	-44.3726	-51.7883	-54.2297
43.35	-91.7969										43.25	-55.9692	-51.6663	-59.2651	-44.0674	-51.9104	-54.5349
43.4	-93.2007										43.3	-55.7556	-51.6968	-60.2112	-43.6096	-51.7578	-54.5044
43.45	-94.696										43.35	-55.9082	-51.8188	-61.2183	-43.6096	-51.7273	-54.3213
43.5	-95.4895										43.4	-56.0608	-51.4832	-61.9812	-43.335	-51.8494	-54.4434
43.55	-95.9167										43.45	-55.9082	-51.7578	-62.4695	-42.9993	-51.7273	-54.2297
43.6	-95.8557										43.5	-55.7556	-51.6052	-63.324	-42.2668	-51.9104	-54.5959
43.65	-95.9473										43.55	-55.7556	-51.4832	-63.9343	-42.1143	-51.8494	-54.4434
43.7	-95.52										43.6	-55.9692	-51.6663	-64.4531	-41.7175	-51.5442	-54.3518
43.75	-94.7571										43.65	-55.7861	-51.1475	-64.6362	-41.0156	-51.9104	-54.5044
43.8	-94.0857										43.7	-55.542	-51.5137	-65.3992	-40.1001	-51.8188	-54.1077
43.85	-93.3227										43.75	-55.542	-51.3611	-65.918	-39.4592	-51.8799	-54.5044
43.9	-92.3157										43.8	-55.6946	-51.3306	-66.1621	-38.6047	-51.8799	-54.4434
43.95	-90.8813										43.85	-55.6946	-51.3306	-66.3147	-37.323	-51.6357	-54.2297
44	-90.0879										43.9	-55.5725	-50.9338	-66.803	-35.4309	-52.0019	-54.5044
44.05	-88.7756										43.95	-55.2368	-51.3	-67.2913	-33.1726	-51.5442	-54.3213
44.1	-87.4939										44	-55.6335	-51.0864	-67.5354	-29.9377	-51.9714	-54.3823
44.15	-86.029										44.05	-55.5115	-51.1475	-67.5964	-25.177	-51.7883	-54.4739
44.2	-84.9914										44.1	-55.542	-51.1475	-67.9932	-18.5547	-51.9104	-54.2908
44.25	-83.5571										44.15	-55.2063	-50.8423	-68.3594	-10.5896	-51.9714	-54.5959
44.3	-82.1228										44.2	-55.3894	-51.1475	-68.4814	-1.98364	-51.5747	-54.5044
44.35	-80.8105										44.25	-55.5725	-50.9644	-68.512	7.23267	-51.9409	-54.2297
44.4	-79.7119										44.3	-55.3894	-50.8423	-68.7256	16.449	-51.7578	-54.5349
44.45	-78.3081										44.35	-55.3589	-50.9033	-69.1833	25.1465	-51.9714	-54.4434
44.5	-76.8738										44.4	-55.1147	-50.5981	-69.1833	32.6233	-51.9104	-54.1687
44.55	-75.592										44.45	-55.4199	-50.8423	-69.2444	38.208	-51.6663	-54.4434
44.6	-74.5544										44.5	-55.3284	-50.7202	-69.1223	42.511	-51.8494	-54.3213
44.65	-73.1506										44.55	-55.2978	-50.293	-69.6106	45.5322	-51.5747	-54.1687
44.7	-71.6247										44.6	-55.1453	-50.6287	-69.6411	47.4243	-51.9714	-54.4434
44.75	-70.5261										44.65	-55.0537	-50.4456	-69.7327	47.9431	-51.8799	-54.2908
44.8	-69.5496										44.7	-55.2673	-50.2624	-69.6411	47.3633	-51.6357	-54.1687
44.85	-68.2983										44.75	-55.1758	-50.415	-69.7937	46.051	-51.9714	-54.5349
44.9	-66.9556										44.8	-55.2368	-50.2319	-70.0989	44.4031	-51.7273	-54.3518
44.95	-65.8569										44.85	-55.0232	-50.0488	-70.1294	42.2974	-51.8494	-54.2908
45	-65.033										44.9	-54.9316	-50.293	-70.1599	39.7034	-51.9104	-54.4739
45.05	-63.8733										44.95	-55.1147	-50.1099	-70.1294	36.6821	-51.7883	-54.3518
45.1	-62.4695										45	-55.0842	-49.8657	-70.3735	33.3557	-52.0325	-54.3213
45.15	-61.6455										45.05	-55.0537	-50.0793	-70.5566	30.1208	-51.8799	-54.5349
45.2	-60.8215										45.1	-54.8401	-49.9878	-70.5566	26.886	-51.6357	-54.4739
45.25	-59.7229										45.15	-54.6875	-49.6216	-70.5872	23.0103	-51.9714	-54.3213
45.3	-58.4106										45.2	-54.9622	-49.8962	-70.4956	19.3481	-51.9714	-54.6265
45.35	-57.5867										45.25	-55.0232	-49.7742	-70.7703	15.7776	-51.5442	-54.4434
45.4	-56.7932										45.3	-54.9622	-49.4385	-70.8618	12.1155	-51.9104	-54.2603
45.45	-55.8472										45.35	-54.657	-49.5911	-70.8923	8.30078	-51.9409	-54.5654
45.5	-54.718										45.4	-54.5044	-49.4995	-70.8313	4.82178	-51.6052	-54.4739
45.55	-53.7415										45.45	-54.6875	-49.2554	-70.7092	1.43433	-51.9104	-54.1382
45.6	-53.0701										45.5	-54.8096	-49.2859	-70.9228	-2.0752	-51.7273	-54.4739
45.65	-52.063										45.55	-54.5959	-49.2554	-71.0449	-5.09644	-51.5442	-54.4434
45.7	-50.9644										45.6	-54.5044	-49.0723	-71.1059	-8.5144	-51.9409	-54.1992
45.75	-49.8657										45.65	-54.2297	-48.8281	-70.9839	-11.6272	-51.7883	-54.5044
45.8	-49.1333										45.7	-54.3213	-49.0723	-70.8923	-14.3433	-51.4832	-54.4434
45.85	-47.9736										45.75	-54.4739	-48.8892	-71.1365	-17.5781	-51.8799	-54.2908
45.9	-46.6003										45.8	-54.5044	-48.4314	-71.3806	-19.928	-51.8188	-54.3213
45.95	-44.8608										45.85	-54.4128	-48.7671	-71.2891	-23.0713	-51.5137	-54.4128
46	-43.1519										45.9	-54.4128	-48.7976	-71.1975	-25.5127	-51.7578	-54.2603
46.05	-40.5884										45.95	-54.1687	-48.3398	-71.0144	-28.2898	-51.7578	-54.1687
46.1	-36.6821										46	-54.1382	-48.4009	-71.167	-30.7312	-51.5137	-54.4434
46.15	-30.5481										46.05	-54.4128	-48.4314	-71.2891	-32.9895	-51.7883	-54.3518
46.2	-22.4609										46.1	-54.4739	-48.2788	-71.3196	-35.4614	-51.7578	-54.0161
46.25	-12.3901										46.15	-54.3823	-48.0041	-71.3196	-37.5671	-51.5137	-54.2908
46.3	-1.00708										46.2	-54.3213	-48.1262	-71.167	-39.8865	-51.6663	-54.3518
46.35	10.8032										46.25	-54.0466	-47.9126	-71.0144	-41.748	-51.7578	-54.1077
46.4	21.8506										46.3	-54.1077	-47.5769	-71.2585	-44.0674	-51.6052	-54.2297
46.45	30.9448										46.35	-54.2908	-47.699	-71.3501	-45.7458	-51.5442	-54.2603
46.5	37.7808										46.4	-54.3213	-47.5769	-71.2891	-47.9431	-51.7273	-54.1382
46.55	41.8091										46.45	-54.1687	-47.3633	-71.3196	-49.5911	-51.7273	-54.0161
46.6	42.7856										46.5	-54.1992	-46.9665	-71.1365	-51.3916	-51.4221	-54.2603
46.65	40.4663										46.55	-54.1992	-47.2412	-70.9534	-52.9785	-51.7578	-54.1992
46.7	34.79										46.6	-53.9246	-46.936	-71.2585	-54.2297	-51.7578	-53.9551
46.75	27.1912										46.65	-53.9856	-46.6309	-71.4111	-55.8777	-51.5442	-54.1382
46.8	17.7612										46.7	-54.1382	-46.4783	-71.3501	-56.8237	-51.7273	-54.2603
46.85	7.35474										46.75	-54.1687	-46.4478	-71.228	-58.197	-51.6052	-54.1687
46.9	-3.84522										46.8	-54.1992	-46.1426	-71.0144	-59.3262	-51.5137	-53.9246
46.95	-15.3809										46.85	-54.0161	-45.5322	-71.1059	-60.0586	-51.5137	-54.2297
47	-26.4587										46.9	-53.894	-45.5627	-71.3196	-61.0962	-51.7273	-54.2297
47.05	-36.9873										46.95	-53.7415	-45.3796	-71.167	-61.7065	-51.6357	-54.0466
47.1	-46.6003										47	-54.0771	-44.9219	-71.0754	-62.6526	-51.3916	-53.9551
47.15	-55.542										47.05	-53.9246	-44.4336	-71.0754	-63.2935	-51.5747	-54.2908
47.2	-63.7207										47.1	-53.8635	-44.3115	-71.228	-63.6291	-51.5442	-54.1382
47.25	-70.5261										47.15	-53.5583	-43.8232	-71.167	-64.5752	-51.4221	-53.894
47.3	-76.4465										47.2	-53.6499	-43.4265	-70.9839	-65.0024	-51.3916	-53.9856
47.35	-81.2988										47.25	-53.772	-42.7246	-71.228	-65.2466	-51.6052	-54.1687
47.4	-85.1746										47.3	-53.6499	-42.4805	-71.2891	-65.979	-51.5442	-54.1687
47.45	-88.501										47.35	-53.4668	-41.8091	-71.0144	-66.3147	-51.239	-53.9246
47.5	-91.1255										47.4	-53.8025	-41.0461	-71.2891	-66.7725	-51.4832	-54.1077
47.55	-93.0481										47.45	-53.5889	-39.978	-71.0754	-67.2607	-51.5137	-54.1382
47.6	-94.1467										47.5	-53.4058	-39.1235	-71.2585	-67.2607	-51.4526	-54.2297
47.65	-95.0012										47.55	-53.6804	-37.5061	-71.3501	-67.9016	-51.239	-53.894
47.7	-95.2148										47.6	-53.5889	-35.4004	-70.9534	-68.1763	-51.5137	-54.1687
47.75	-95.1843										47.65	-53.5278	-32.074	-71.228	-68.1152	-51.4832	-54.1992
47.8	-95.2454										47.7	-53.5889	-27.771	-71.0144	-68.7561	-51.3306	-54.1382
47.85	-94.8486										47.75	-53.2532	-21.1487	-71.228	-68.9392	-51.2085	-54.0161
47.9	-94.1772										47.8	-53.5583	-12.7869	-71.1059	-68.7866	-51.4832	-54.1382
47.95	-93.3227										47.85	-53.4668	-2.9602	-70.9839	-69.4275	-51.3916	-54.1382
48	-92.4072										47.9	-53.2227	7.04956	-71.1365	-69.4275	-51.178	-54.2297
48.05	-91.2476										47.95	-53.3447	17.334	-70.8008	-69.3054	-51.2695	-53.9246
48.1	-89.9048										48	-53.009	26.886	-71.167	-69.8547	-51.4526	-54.1077
48.15	-88.8367										48.05	-53.4058	35.3088	-70.8008	-69.9158	-51.3611	-54.1687
48.2	-87.677										48.1	-53.2532	41.9617	-71.1059	-69.9158	-51.0559	-54.0771
48.25	-86.3953										48.15	-53.1921	46.6003	-71.0449	-70.282	-51.2695	-54.0466
48.3	-85.083										48.2	-53.1616	49.8657	-70.9839	-70.404	-51.3916	-53.9551
48.35	-83.6487										48.25	-52.948	51.5137	-71.0449	-70.1904	-51.3611	-54.2297
48.4	-82.1838										48.3	-53.2837	52.0325	-70.7703	-70.7397	-51.239	-54.1382
48.45	-80.78										48.35	-53.1921	51.0864	-71.167	-70.6787	-51.239	-54.0161
48.5	-79.1321										48.4	-53.1616	49.3164	-70.9839	-70.3735	-51.5137	-53.8635
48.55	-77.8198										48.45	-53.2837	46.9055	-71.0144	-70.9534	-51.3611	-54.1382
48.6	-76.6296										48.5	-52.948	44.0979	-71.0449	-70.9839	-51.1169	-54.1382
48.65	-75.3479										48.55	-53.2227	41.1682	-70.6787	-70.7397	-51.2085	-54.1077
48.7	-74.0356										48.6	-53.1311	37.323	-71.0449	-71.1365	-51.4526	-53.9856
48.75	-72.5403										48.65	-52.9785	33.0811	-70.8618	-71.0754	-51.3	-53.9856
48.8	-71.0754										48.7	-53.1311	29.1138	-70.7703	-70.8618	-51.2085	-54.1992
48.85	-69.7937										48.75	-52.8259	24.8413	-70.8923	-71.3196	-51.0864	-54.1687
48.9	-68.2678										48.8	-52.948	20.752	-70.6787	-71.3196	-51.4832	-53.9856
48.95	-67.0166										48.85	-52.9175	16.3269	-70.8618	-71.1365	-51.2695	-53.772
49	-65.918										48.9	-52.6428	11.8103	-70.9534	-71.3806	-51.2085	-54.0161
49.05	-64.8804										48.95	-52.948	7.50732	-70.5566	-71.4722	-51.0254	-54.0161
49.1	-63.6291										49	-52.7649	3.38745	-70.9534	-71.3501	-51.3916	-53.9551
49.15	-62.439										49.05	-52.4902	-0.305176	-70.8008	-71.4111	-51.3306	-53.833
49.2	-61.1572										49.1	-52.8259	-4.15039	-70.5872	-71.6553	-51.2695	-53.8025
49.25	-60.0891										49.15	-52.7954	-8.02612	-70.8618	-71.6553	-51.0254	-53.9551
49.3	-59.3262										49.2	-52.3376	-11.5051	-70.7092	-71.5637	-51.1475	-54.1382
49.35	-58.1665										49.25	-52.7344	-14.8621	-70.6177	-71.8689	-51.4221	-53.9856
49.4	-56.8237										49.3	-52.7344	-18.0054	-70.7397	-71.8079	-51.3	-53.8635
49.45	-55.9387										49.35	-52.4597	-20.9656	-70.5566	-71.6247	-51.178	-53.833
49.5	-55.1453										49.4	-52.4902	-23.7732	-70.4956	-71.9299	-50.9949	-54.0466
49.55	-53.9551										49.45	-52.5818	-26.7639	-70.5872	-71.8994	-51.239	-54.1077
49.6	-52.948										49.5	-52.3987	-29.6326	-70.4956	-71.7163	-51.3611	-54.0466
49.65	-52.124										49.55	-52.5513	-32.074	-70.4651	-71.8079	-51.239	-53.833
49.7	-51.0559										49.6	-52.4292	-34.668	-70.5261	-71.9604	-51.0254	-53.7415
49.75	-50.0793										49.65	-52.3376	-36.9263	-70.4651	-71.8994	-51.0254	-53.894
49.8	-49.1333										49.7	-52.2766	-39.3372	-70.2515	-71.6247	-51.1475	-53.9856
49.85	-47.76										49.75	-52.3682	-41.8701	-70.4956	-71.991	-51.3306	-53.833
49.9	-46.7834										49.8	-52.3376	-44.1894	-70.282	-71.9604	-51.1475	-53.833
49.95	-45.2576										49.85	-52.0325	-46.3562	-70.3125	-71.7773	-51.1169	-53.6804
50	-43.1213										49.9	-52.2461	-48.2483	-70.4956	-71.991	-50.9033	-53.7415
50.05	-40.7715										49.95	-52.2156	-50.1099	-70.3735	-72.0825	-51.2085	-53.9551
50.1	-36.6516										50	-51.9104	-51.7273	-70.1294	-72.0215	-51.2085	-53.9551
50.15	-31.1279										50.05	-52.1851	-53.5889	-70.4346	-71.7773	-51.239	-53.9856
50.2	-23.2239										50.1	-52.1545	-55.2673	-70.3125	-72.0215	-51.0864	-53.8635
50.25	-12.8479										50.15	-51.9409	-56.6406	-69.9768	-71.991	-50.8423	-53.6804
50.3	-1.92261										50.2	-52.0019	-57.9224	-70.282	-71.8384	-51.1169	-54.0161
50.35	9.82666										50.25	-52.0935	-58.96	-70.2515	-72.0215	-51.178	-53.9551
50.4	20.5688										50.3	-51.8494	-59.8144	-69.9158	-72.0215	-51.1475	-53.9246
50.45	29.8767										50.35	-51.6663	-60.8826	-70.2515	-71.9299	-50.9949	-53.6804
50.5	37.262										50.4	-51.9714	-61.9202	-70.0989	-71.6553	-50.8423	-53.9551
50.55	41.1682										50.45	-51.9104	-62.7747	-69.7632	-71.9604	-50.9033	-53.8635
50.6	42.2363										50.5	-51.5442	-63.446	-70.0684	-71.9604	-51.1475	-53.5889
50.65	40.1916										50.55	-51.6663	-64.0564	-70.0989	-71.8079	-50.9949	-53.9551
50.7	35.2173										50.6	-51.7578	-64.6973	-69.8852	-71.6553	-51.0864	-53.833
50.75	28.0762										50.65	-51.5747	-65.094	-69.9158	-72.0215	-50.8423	-53.4058
50.8	18.7073										50.7	-51.4526	-65.3992	-70.1294	-71.9604	-50.8118	-53.9246
50.85	8.30078										50.75	-51.6052	-65.918	-69.9463	-71.7773	-51.0559	-53.6804
50.9	-2.34985										50.8	-51.6968	-66.7114	-69.6716	-71.7163	-51.0254	-53.772
50.95	-13.8855										50.85	-51.3916	-67.0471	-70.0073	-72.0215	-50.9949	-53.833
51	-24.9634										50.9	-51.4526	-67.3828	-69.9463	-71.9299	-50.9338	-53.4668
51.05	-35.3088										50.95	-51.5442	-67.6269	-69.7327	-71.7468	-50.8423	-53.9551
51.1	-45.5933										51	-51.5137	-67.8711	-69.8852	-71.7163	-50.6592	-53.7415
51.15	-54.3823										51.05	-51.239	-67.8406	-69.7632	-71.8994	-50.8728	-53.8025
51.2	-62.1643										51.1	-51.3916	-68.2678	-69.6411	-71.9299	-50.9338	-53.8635
51.25	-69.458										51.15	-51.3916	-68.6951	-69.6106	-71.6553	-50.8728	-53.6804
51.3	-75.4394										51.2	-51.2695	-68.8782	-69.8242	-71.5332	-50.8423	-53.9246
51.35	-80.3833										51.25	-50.9338	-68.8782	-69.7021	-71.8079	-50.4761	-53.4973
51.4	-84.5947										51.3	-51.2695	-69.0308	-69.3359	-71.7468	-50.7202	-53.8025
51.45	-87.9822										51.35	-51.0559	-69.397	-69.6411	-71.5332	-50.7812	-53.5278
51.5	-90.4846										51.4	-50.9033	-69.4275	-69.6716	-71.4111	-50.6897	-53.833
51.55	-92.1631										51.45	-50.8118	-69.3359	-69.519	-71.6247	-50.415	-53.6194
51.6	-93.7195										51.5	-50.9644	-69.7632	-69.397	-71.7468	-50.6592	-53.7415
51.65	-94.5434										51.55	-50.9033	-69.9768	-69.7327	-71.4722	-50.6897	-53.833
51.7	-94.7571										51.6	-50.7812	-69.7632	-69.6411	-71.3501	-50.6287	-53.6194
51.75	-94.9097										51.65	-50.6592	-70.282	-69.2749	-71.6553	-50.415	-53.833
51.8	-94.8486										51.7	-50.8118	-70.2515	-69.519	-71.7468	-50.5676	-53.4973
51.85	-94.3603										51.75	-50.6592	-69.9768	-69.5801	-71.5637	-50.4761	-53.9246
51.9	-93.6279										51.8	-50.5066	-70.404	-69.4885	-71.3196	-50.4761	-53.772
51.95	-92.8955										51.85	-50.354	-70.404	-69.2139	-71.4722	-50.5676	-53.7415
52	-92.1936										51.9	-50.6592	-70.404	-69.4275	-71.5637	-50.1709	-53.833
52.05	-91.0034										51.95	-50.354	-70.4956	-69.397	-71.5027	-50.4761	-53.5583
52.1	-89.6912										52	-50.2624	-70.282	-69.2749	-71.2891	-50.354	-53.8635
52.15	-88.8367										52.05	-50.0183	-70.6787	-69.1528	-71.2891	-50.2624	-53.7109
52.2	-87.5244										52.1	-50.2624	-70.6177	-69.3359	-71.5332	-50.3235	-53.7109
52.25	-86.0901										52.15	-50.1099	-70.5872	-69.2139	-71.4111	-50.0183	-53.8025
52.3	-84.5947										52.2	-49.8962	-70.7092	-69.1223	-71.3501	-50.415	-53.5278
52.35	-83.4656										52.25	-49.6216	-70.4346	-69.0002	-71.0754	-50.2014	-53.8025
52.4	-82.0923										52.3	-49.8657	-70.8313	-69.2749	-71.2585	-50.2624	-53.8025
52.45	-80.5969										52.35	-49.8657	-70.7397	-69.2139	-71.4111	-50.2624	-53.5278
52.5	-78.8574										52.4	-49.7436	-70.4956	-69.0308	-71.3196	-50.1404	-53.9246
52.55	-77.8198										52.45	-49.3469	-70.8618	-69.0308	-71.1975	-50.415	-53.8025
52.6	-76.355										52.5	-49.469	-70.8313	-69.1833	-71.0449	-50.0793	-53.6804
52.65	-74.9512										52.55	-49.5605	-70.8313	-69.1528	-71.3196	-50.2624	-53.8025
52.7	-73.2727										52.6	-49.4385	-70.8618	-69.0002	-71.4416	-50.2624	-53.6499
52.75	-72.1741										52.65	-49.1943	-70.6482	-68.9087	-71.2891	-50.1709	-53.8635
52.8	-70.9228										52.7	-49.0417	-71.0144	-69.0918	-71.0449	-50.2319	-53.7415
52.85	-69.4885										52.75	-49.2859	-71.0144	-68.9697	-70.9839	-49.9573	-53.5278
52.9	-67.9016										52.8	-49.1028	-70.6787	-68.8782	-71.3196	-50.2014	-53.8635
52.95	-66.803										52.85	-48.9807	-70.9839	-68.6951	-71.228	-50.0488	-53.8025
53	-65.7043										52.9	-48.6755	-71.0144	-68.9087	-71.0754	-50.0488	-53.4668
53.05	-64.3921										52.95	-48.584	-70.6787	-68.8476	-70.9839	-50.1099	-53.772
53.1	-62.9578										53	-48.6755	-71.0144	-68.6951	-70.8618	-49.7131	-53.7415
53.15	-61.9507										53.05	-48.4009	-70.9228	-68.5425	-71.1059	-50.2624	-53.4973
53.2	-60.9741										53.1	-48.2788	-70.6482	-68.7866	-71.1059	-50.0488	-53.8635
53.25	-59.8144										53.15	-47.9431	-71.0754	-68.8476	-70.9534	-49.8657	-53.8025
53.3	-58.5327										53.2	-47.9736	-70.9534	-68.7561	-71.0144	-50.1099	-53.5583
53.35	-57.5256										53.25	-47.9736	-70.6787	-68.512	-70.7092	-49.9878	-53.9551
53.4	-56.7627										53.3	-47.8516	-70.9839	-68.7256	-70.9228	-49.9878	-53.833
53.45	-55.6641										53.35	-47.7295	-70.9534	-68.6951	-70.9839	-50.0793	-53.5889
53.5	-54.4434										53.4	-47.2717	-70.8618	-68.634	-71.0144	-49.9268	-53.894
53.55	-53.3752										53.45	-47.3022	-70.8313	-68.573	-70.6482	-50.0793	-53.894
53.6	-52.5818										53.5	-47.2717	-71.0754	-68.3899	-70.8618	-50.1404	-53.5583
53.65	-51.6357										53.55	-47.0886	-70.9534	-68.6035	-70.8923	-49.8657	-53.894
53.7	-50.4456										53.6	-46.936	-70.7397	-68.4814	-70.7703	-50.0488	-53.772
53.75	-49.0112										53.65	-46.3867	-71.0754	-68.3594	-70.8313	-50.0793	-53.5583
53.8	-48.0041										53.7	-46.3562	-70.9228	-68.0847	-70.8618	-49.8047	-53.8025
53.85	-46.875										53.75	-46.2952	-70.7092	-68.2068	-70.5566	-50.1099	-53.8025
53.9	-45.2576										53.8	-46.051	-71.0144	-68.3594	-70.7397	-49.9878	-53.4363
53.95	-43.2129										53.85	-45.8069	-70.9839	-68.1763	-70.7092	-49.6826	-53.7415
54	-40.5579										53.9	-45.3796	-70.7397	-68.1763	-70.404	-50.0183	-53.833
54.05	-36.8957										53.95	-44.7998	-70.7092	-67.9626	-70.7703	-49.9573	-53.5278
54.1	-31.0059										54	-44.8303	-70.9534	-68.0847	-70.404	-49.6521	-53.7415
54.15	-22.8271										54.05	-44.6167	-70.8618	-68.2068	-70.8008	-49.8962	-53.7109
54.2	-12.6953										54.1	-44.0674	-70.6177	-68.1457	-70.5872	-49.9268	-53.6499
54.25	-1.70898										54.15	-43.6401	-70.8618	-68.0542	-70.4956	-49.6826	-53.7415
54.3	9.67407										54.2	-43.1519	-70.9228	-67.7185	-70.6482	-49.8352	-53.7415
54.35	20.5994										54.25	-42.5415	-70.8008	-67.9626	-70.3735	-49.8657	-53.7109
54.4	30.0903										54.3	-42.1448	-70.7092	-68.1152	-70.7092	-49.6521	-53.5583
54.45	37.1094										54.35	-41.5955	-70.9228	-67.9626	-70.2209	-49.7131	-53.894
54.5	40.863										54.4	-40.6189	-70.9228	-67.8711	-70.5872	-49.6826	-53.8025
54.55	41.9311										54.45	-39.6728	-70.5261	-67.5659	-70.2515	-49.6216	-53.4668
54.6	39.8254										54.5	-38.0859	-70.8008	-67.7185	-70.5872	-49.469	-53.772
54.65	35.0647										54.55	-36.3159	-70.8313	-67.8711	-70.3125	-49.7131	-53.6499
54.7	27.71										54.6	-33.8135	-70.7092	-67.8711	-70.4346	-49.5911	-53.5583
54.75	18.4631										54.65	-29.8157	-70.5261	-67.7185	-70.3735	-49.2554	-53.5583
54.8	8.23974										54.7	-23.8342	-70.8618	-67.6269	-70.3125	-49.6216	-53.6804
54.85	-2.62451										54.75	-15.9912	-70.7397	-67.4744	-70.343	-49.6521	-53.6804
54.9	-13.5803										54.8	-6.28662	-70.4956	-67.6575	-70.0989	-49.1638	-53.4363
54.95	-24.4141										54.85	4.27246	-70.5566	-67.688	-70.2515	-49.5605	-53.7415
55	-34.9121										54.9	14.9536	-70.7703	-67.5354	-70.0378	-49.53	-53.6804
55.05	-44.6472										54.95	25.0244	-70.7092	-67.6269	-70.3735	-49.408	-53.4973
55.1	-53.4363										55	33.9966	-70.404	-67.3523	-70.0378	-49.469	-53.6194
55.15	-61.2183										55.05	41.4429	-70.7092	-67.4133	-70.2209	-49.408	-53.6499
55.2	-68.0237										55.1	47.0581	-70.8313	-67.5354	-70.2209	-49.3774	-53.5889
55.25	-74.0356										55.15	50.9338	-70.6482	-67.4744	-69.9463	-49.1638	-53.3752
55.3	-79.3457										55.2	53.0701	-70.3125	-67.3523	-70.0989	-49.469	-53.7415
55.35	-83.4961										55.25	53.5583	-70.5872	-67.1081	-69.8852	-49.408	-53.6194
55.4	-86.8225										55.3	52.4902	-70.7703	-67.3523	-70.0378	-49.1333	-53.4058
55.45	-89.2944										55.35	50.8118	-70.6482	-67.2607	-69.9768	-49.3469	-53.4668
55.5	-91.095										55.4	48.1262	-70.1904	-67.1081	-69.7327	-49.3164	-53.6804
55.55	-92.5293										55.45	44.7998	-70.5261	-67.2302	-69.9463	-49.1943	-53.6194
55.6	-93.6279										55.5	41.0767	-70.5566	-67.1997	-69.7327	-48.9502	-53.2837
55.65	-94.1467										55.55	36.3159	-70.5872	-67.0471	-69.7327	-49.2554	-53.4668
55.7	-94.1772										55.6	31.8298	-70.2209	-67.1692	-69.7327	-49.2248	-53.5583
55.75	-94.0552										55.65	27.1301	-70.3735	-67.1081	-69.4885	-48.9502	-53.4668
55.8	-93.5059										55.7	22.1252	-70.5566	-66.8335	-69.8242	-48.9807	-53.1921
55.85	-92.7734										55.75	16.9373	-70.4346	-67.0776	-69.7632	-49.1028	-53.4973
55.9	-91.98										55.8	12.1155	-70.343	-67.0776	-69.4275	-49.0723	-53.5583
55.95	-91.2781										55.85	7.53784	-70.2209	-66.803	-69.6106	-48.7671	-53.4973
56	-90.3931										55.9	2.41089	-70.5566	-66.9556	-69.458	-48.9807	-53.1311
56.05	-89.2334										55.95	-1.80054	-70.4956	-66.7114	-69.5496	-48.8892	-53.4973
56.1	-88.0127										56	-5.82886	-70.2515	-67.0166	-69.6106	-48.8586	-53.5278
56.15	-86.792										56.05	-10.1624	-70.0989	-66.864	-69.1833	-48.7366	-53.4363
56.2	-85.4797										56.1	-13.8855	-70.404	-66.7419	-69.458	-48.9807	-53.2532
56.25	-84.198										56.15	-17.5781	-70.343	-66.7114	-69.4275	-48.8892	-53.5278
56.3	-82.5806										56.2	-20.9656	-70.2209	-66.4978	-69.0613	-48.6755	-53.4668
56.35	-81.3904										56.25	-23.9563	-69.9158	-66.7419	-69.4885	-48.6755	-53.4058
56.4	-80.2917										56.3	-27.4963	-70.1599	-66.3147	-69.2749	-48.8586	-53.1616
56.45	-78.949										56.35	-30.4565	-70.1904	-66.6504	-69.0308	-48.7976	-53.4973
56.5	-77.5146										56.4	-33.2947	-70.1904	-66.4673	-69.3054	-48.5535	-53.4363
56.55	-76.0193										56.45	-36.2244	-70.0073	-66.5893	-69.1223	-48.7061	-53.3752
56.6	-74.707										56.5	-38.6047	-69.8547	-66.5283	-69.0002	-48.7671	-53.1921
56.65	-73.3032										56.55	-41.5649	-70.2209	-66.2842	-69.1833	-48.8281	-53.4058
56.7	-71.7773										56.6	-44.0063	-70.0989	-66.4368	-69.1223	-48.584	-53.4058
56.75	-70.5261										56.65	-46.2036	-70.0989	-66.2537	-68.9697	-48.645	-53.4973
56.8	-69.397										56.7	-48.6755	-69.7632	-66.6199	-69.1223	-48.8281	-53.2227
56.85	-68.2678										56.75	-50.6897	-70.0073	-66.1926	-68.9392	-48.6755	-53.2837
56.9	-66.9861										56.8	-52.6733	-70.1294	-66.3757	-69.0002	-48.5229	-53.4668
56.95	-65.6433										56.85	-54.4128	-69.9158	-66.3452	-69.0918	-48.4619	-53.3447
57	-64.4836										56.9	-55.7861	-69.9158	-65.979	-68.8171	-48.6755	-53.2837
57.05	-63.3545										56.95	-57.6782	-69.7632	-66.2537	-68.9392	-48.6145	-53.1311
57.1	-62.0727										57	-59.021	-69.8242	-66.04	-68.8782	-48.4009	-53.3447
57.15	-60.8826										57.05	-59.7839	-69.8852	-66.04	-68.7256	-48.3398	-53.3447
57.2	-59.7534										57.1	-61.2488	-69.7327	-66.0705	-68.7866	-48.6145	-53.3142
57.25	-58.8379										57.15	-62.1338	-69.6411	-65.7959	-68.7866	-48.5229	-53.1006
57.3	-57.8918										57.2	-62.7747	-69.4885	-66.0095	-68.6645	-48.4009	-53.1616
57.35	-56.9153										57.25	-63.9343	-69.6106	-66.04	-68.7561	-48.2483	-53.3752
57.4	-55.9082										57.3	-64.5142	-69.7021	-65.6738	-68.6645	-48.5535	-53.4058
57.45	-54.9011										57.35	-64.7888	-69.6411	-66.04	-68.512	-48.4619	-53.1616
57.5	-53.833										57.4	-65.6738	-69.6716	-65.8569	-68.5425	-48.4314	-53.0701
57.55	-53.009										57.45	-66.0705	-69.4275	-65.7654	-68.8171	-48.1873	-53.3142
57.6	-52.2461										57.5	-66.2231	-69.458	-65.8874	-68.5425	-48.2483	-53.4363
57.65	-51.2085										57.55	-66.8945	-69.6106	-65.7654	-68.4509	-48.4314	-53.4363
57.7	-50.1099										57.6	-67.2607	-69.6716	-65.7043	-68.634	-48.2788	-53.1616
57.75	-49.1028										57.65	-67.4133	-69.7327	-65.7959	-68.573	-48.2483	-53.0701
57.8	-48.1873										57.7	-67.6575	-69.458	-65.5823	-68.3899	-47.9736	-53.4668
57.85	-46.875										57.75	-68.1152	-69.2749	-65.7043	-68.6035	-48.1262	-53.4363
57.9	-45.1965										57.8	-68.2373	-69.519	-65.7043	-68.4814	-48.1873	-53.3447
57.95	-43.8538										57.85	-68.2068	-69.5496	-65.3992	-68.1457	-48.0957	-53.2532
58	-41.7175										57.9	-68.6035	-69.4885	-65.6128	-68.5425	-47.8821	-53.1311
58.05	-38.147										57.95	-68.6951	-69.397	-65.5518	-68.4509	-47.6685	-53.3752
58.1	-33.5693										58	-68.5425	-69.2444	-65.2771	-67.9932	-48.0041	-53.5278
58.15	-26.7639										58.05	-68.9087	-69.0613	-65.5212	-68.3594	-47.9126	-53.3752
58.2	-17.395										58.1	-69.0613	-69.397	-65.3686	-68.2983	-47.821	-53.3142
58.25	-7.17163										58.15	-69.0918	-69.3664	-65.2161	-68.1152	-47.76	-53.1921
58.3	4.24194										58.2	-68.9087	-69.2444	-65.4297	-68.1152	-47.6379	-53.3142
58.35	15.3503										58.25	-69.3664	-69.2444	-65.3992	-68.2068	-47.7295	-53.4668
58.4	25.2075										58.3	-69.3664	-69.0613	-65.0024	-68.2068	-47.7295	-53.4363
58.45	33.6914										58.35	-69.1528	-69.0002	-65.4297	-67.9016	-47.699	-53.4363
58.5	38.8489										58.4	-69.458	-69.1833	-65.3686	-68.2678	-47.5769	-53.2227
58.55	41.4124										58.45	-69.6106	-69.2749	-64.9719	-68.2068	-47.3328	-53.1616
58.6	41.1377										58.5	-69.6106	-69.1528	-65.155	-67.9626	-47.4548	-53.4668
58.65	37.262										58.55	-69.2749	-69.0918	-65.155	-68.1457	-47.6074	-53.3752
58.7	31.4636										58.6	-69.7021	-69.0002	-65.0024	-68.1152	-47.4243	-53.3142
58.75	23.1628										58.65	-69.7632	-68.7866	-64.9719	-67.9016	-47.2717	-53.1921
58.8	13.3972										58.7	-69.7327	-68.9392	-64.9719	-67.8406	-46.9665	-53.4363
58.85	3.20434										58.75	-69.519	-69.1223	-64.8498	-68.1457	-47.0581	-53.3752
58.9	-8.11768										58.8	-69.8242	-69.0308	-64.8804	-67.9932	-47.2107	-53.009
58.95	-18.9819										58.85	-69.7021	-68.9392	-64.9414	-67.8101	-47.0276	-53.3142
59	-29.2969										58.9	-69.7327	-68.9392	-64.8498	-67.8406	-46.9665	-53.3447
59.05	-39.6423										58.95	-69.7632	-68.6645	-64.6362	-67.9016	-46.7224	-53.0395
59.1	-48.645										59	-70.0073	-68.5425	-64.9414	-67.8406	-46.6003	-53.4058
59.15	-56.9763										59.05	-69.8547	-68.7256	-64.7888	-67.5659	-46.7834	-53.3447
59.2	-64.6057										59.1	-69.7327	-68.8782	-64.4531	-67.8406	-46.814	-52.9785
59.25	-70.9534										59.15	-69.8547	-68.8782	-64.8193	-67.8711	-46.6614	-53.3142
59.3	-76.2634										59.2	-69.9463	-68.7866	-64.6973	-67.7185	-46.6003	-53.1311
59.35	-81.1462										59.25	-70.0073	-68.6951	-64.5447	-67.5049	-46.4478	-53.3142
59.4	-84.8694										59.3	-69.7937	-68.573	-64.5142	-67.8101	-46.3562	-53.2227
59.45	-87.4939										59.35	-69.9463	-68.7256	-64.5447	-67.749	-46.4783	-53.1311
59.5	-90.1184										59.4	-70.0989	-68.7561	-64.4226	-67.6269	-46.5088	-53.2532
59.55	-91.7969										59.45	-70.0684	-68.6951	-64.1785	-67.4744	-46.4478	-52.948
59.6	-92.865										59.5	-69.8242	-68.6645	-64.4531	-67.6575	-46.3257	-53.2837
59.65	-93.6279										59.55	-69.9768	-68.2678	-64.3616	-67.6575	-46.0205	-52.9785
59.7	-94.1772										59.6	-70.1294	-68.6951	-63.9038	-67.3523	-46.1426	-53.2532
59.75	-94.0552										59.65	-70.0378	-68.5425	-64.331	-67.4438	-46.3257	-53.1006
59.8	-93.4753										59.7	-69.8547	-68.4509	-64.209	-67.5659	-46.1426	-53.1921
59.85	-93.2312										59.75	-69.9158	-68.2983	-64.0564	-67.4438	-45.8374	-53.2227
59.9	-92.6819										59.8	-70.1294	-68.512	-63.9038	-67.2607	-45.929	-52.948
59.95	-91.8274										59.85	-69.9463	-68.3594	-64.2395	-67.3523	-46.1426	-53.3752
60	-90.5456										59.9	-69.8242	-68.2373	-64.0869	-67.4438	-45.8984	-52.887
60.05	-89.8132										59.95	-69.8852	-68.4814	-63.8123	-67.3828	-45.6238	-53.2532
60.1	-88.7146										60	-70.0684	-68.2373	-64.0564	-67.1387	-45.8374	-53.009
60.15	-87.4634										60.05	-70.0073	-68.2678	-64.0259	-67.2607	-45.6848	-53.2532
60.2	-85.9985										60.1	-69.9158	-68.3594	-63.9343	-67.2913	-45.4712	-53.1616
60.25	-84.8389										60.15	-69.7021	-67.9626	-63.5986	-67.2302	-45.4712	-52.7954
60.3	-83.6487										60.2	-70.0073	-68.3899	-63.9343	-67.1081	-45.1965	-52.9175
60.35	-82.2143										60.25	-70.0073	-68.2068	-63.8733	-67.0166	-45.2881	-52.7649
60.4	-80.6274										60.3	-69.9768	-67.9932	-63.6291	-67.1081	-45.166	-52.9785
60.45	-79.4678										60.35	-69.7937	-68.1763	-63.6902	-66.9556	-44.7082	-52.7954
60.5	-78.2165										60.4	-69.7327	-67.8406	-63.7512	-66.7725	-44.8303	-52.3987
60.55	-76.8127										60.45	-69.8852	-68.1763	-63.7207	-66.5588	-44.4641	-52.4597
60.6	-75.1648										60.5	-69.7327	-67.9626	-63.3545	-66.7725	-44.4336	-52.2461
60.65	-73.822										60.55	-69.7021	-67.8711	-63.5681	-66.6199	-44.22	-52.3071
60.7	-72.7234										60.6	-69.4885	-68.0237	-63.5986	-66.4673	-43.8232	-52.2156
60.75	-71.3196										60.65	-69.6716	-67.6575	-63.385	-66.1621	-43.7927	-51.8188
60.8	-69.8852										60.7	-69.7937	-67.9626	-63.2019	-66.2537	-43.2434	-52.124
60.85	-68.573										60.75	-69.7937	-67.8101	-63.385	-66.3757	-43.3655	-51.8799
60.9	-67.4744										60.8	-69.7327	-67.7795	-63.3545	-66.1011	-42.9077	-51.4221
60.95	-66.2231										60.85	-69.397	-67.8406	-63.2019	-65.9485	-42.8467	-51.7273
61	-64.8498										60.9	-69.7021	-67.5354	-62.9578	-65.7654	-42.5415	-51.6052
61.05	-63.5986										60.95	-69.7327	-67.7795	-63.1409	-65.8264	-41.9922	-51.3611
61.1	-62.7747										61	-69.7937	-67.749	-63.0188	-65.7043	-41.8396	-51.3611
61.15	-61.6455										61.05	-69.6716	-67.4133	-62.8357	-65.6128	-41.1377	-51.1169
61.2	-60.6079										61.1	-69.4275	-67.7185	-62.561	-65.3686	-41.2292	-51.0559
61.25	-59.2041										61.15	-69.7021	-67.5354	-62.6831	-65.2161	-40.5579	-51.0559
61.3	-58.5632										61.2	-69.6106	-67.2607	-62.7441	-65.3381	-40.1306	-50.6897
61.35	-57.5867										61.25	-69.6411	-67.4744	-62.561	-65.2161	-39.6728	-50.5981
61.4	-56.6101										61.3	-69.4885	-67.3828	-62.1338	-65.094	-38.7268	-50.5676
61.45	-55.6641										61.35	-69.3664	-67.1081	-62.4084	-64.8498	-38.5742	-50.2014
61.5	-54.8706										61.4	-69.5801	-67.2607	-62.3474	-64.9109	-37.7808	-50.3235
61.55	-54.0466										61.45	-69.5801	-67.1387	-62.2253	-64.9109	-36.7126	-50.2014
61.6	-53.2227										61.5	-69.5801	-66.864	-61.9812	-64.8498	-35.9802	-49.8352
61.65	-52.2461										61.55	-69.4275	-67.1387	-61.9202	-64.7278	-34.668	-50.0183
61.7	-51.3611										61.6	-69.1528	-66.925	-62.0728	-64.27	-33.0811	-49.8657
61.75	-50.7812										61.65	-69.4885	-66.803	-61.9812	-64.5447	-31.0669	-49.53
61.8	-49.8352										61.7	-69.4885	-67.0166	-61.7981	-64.6057	-28.0762	-49.7131
61.85	-48.8281										61.75	-69.458	-66.864	-61.5234	-64.5142	-24.6582	-49.5911
61.9	-47.4548										61.8	-69.458	-66.6199	-61.7676	-63.9954	-19.8975	-49.2859
61.95	-46.4783										61.85	-69.2444	-66.864	-61.676	-64.3005	-13.5803	-49.2859
62	-45.3796										61.9	-69.1833	-66.7725	-61.554	-64.1785	-6.98852	-49.1333
62.05	-43.7012										61.95	-69.2749	-66.3757	-61.2488	-64.0259	0.396728	-48.7671
62.1	-41.3513										62	-69.3359	-66.5893	-61.2793	-63.9954	8.5144	-48.8586
62.15	-37.9639										62.05	-69.3359	-66.6199	-61.4929	-63.9343	15.5334	-48.7976
62.2	-33.4778										62.1	-69.2139	-66.3147	-61.3098	-63.7207	22.644	-48.4314
62.25	-26.4893										62.15	-69.0613	-66.4368	-61.1572	-63.7817	28.7781	-48.4314
62.3	-17.4255										62.2	-69.0002	-66.3452	-60.9741	-63.7207	33.6304	-48.4314
62.35	-6.71387										62.25	-69.2139	-66.2231	-61.0352	-63.4155	37.5977	-48.2178
62.4	4.5166										62.3	-69.2444	-66.0095	-61.1877	-63.5681	40.4663	-48.0347
62.45	15.1978										62.35	-69.1223	-66.2231	-61.0657	-63.324	42.2363	-48.0652
62.5	25.238										62.4	-69.1833	-66.1316	-60.9741	-63.5071	43.1213	-47.9736
62.55	33.2642										62.45	-68.9697	-65.7959	-60.73	-63.2935	43.6401	-47.5464
62.6	38.8184										62.5	-68.9392	-66.1316	-60.8215	-63.3545	43.5181	-47.699
62.65	41.1682										62.55	-69.1833	-66.04	-60.9436	-63.3545	42.4499	-47.5464
62.7	40.4968										62.6	-69.1833	-65.8569	-60.8826	-63.2019	41.2903	-47.2107
62.75	37.262										62.65	-69.1223	-65.7959	-60.7605	-63.2324	39.978	-47.3938
62.8	31.3721										62.7	-69.2139	-66.04	-60.4248	-62.8662	37.8113	-47.1497
62.85	23.6816										62.75	-69.0002	-65.979	-60.6079	-63.2019	35.7056	-46.7529
62.9	14.2517										62.8	-68.8782	-65.5518	-60.6995	-62.8357	33.4473	-46.7529
62.95	3.66211										62.85	-68.9392	-65.7959	-60.5469	-63.1714	30.5481	-46.6614
63	-6.92749										62.9	-69.1223	-65.7959	-60.5774	-62.6831	27.6794	-46.3257
63.05	-17.7002										62.95	-69.0918	-65.5518	-60.2722	-62.8967	24.9023	-45.99
63.1	-28.1067										63	-69.0002	-65.5823	-60.3027	-62.7441	21.8201	-46.0815
63.15	-37.9028										63.05	-68.8782	-65.7043	-60.5469	-62.8662	18.28	-45.8069
63.2	-47.3022										63.1	-68.7561	-65.6128	-60.4248	-62.7136	15.0452	-45.2576
63.25	-55.7251										63.15	-68.634	-65.3381	-60.3638	-62.561	12.0544	-45.4407
63.3	-63.1409										63.2	-68.7256	-65.4907	-60.1196	-62.7441	8.39233	-45.1965
63.35	-69.7021										63.25	-68.9087	-65.5518	-60.0891	-62.3474	5.0354	-44.8608
63.4	-75.1038										63.3	-68.8476	-65.3992	-60.3332	-62.6831	1.98364	-44.5251
63.45	-79.6814										63.35	-68.9697	-65.2161	-60.2722	-62.2864	-1.06812	-44.4641
63.5	-83.6792										63.4	-68.8476	-65.4907	-60.1807	-62.6526	-4.48608	-44.1284
63.55	-86.9141										63.45	-68.7561	-65.3381	-60.1196	-62.561	-7.38525	-43.5486
63.6	-89.2944										63.5	-68.573	-65.2466	-59.8144	-62.2559	-10.1013	-43.5486
63.65	-91.0034										63.55	-68.7561	-65.1245	-60.1196	-62.439	-13.2141	-43.0298
63.7	-92.1936										63.6	-68.9697	-65.3686	-60.0281	-62.1033	-15.9302	-42.511
63.75	-92.9565										63.65	-68.8171	-65.2466	-59.9365	-62.5305	-18.4631	-41.9311
63.8	-93.2007										63.7	-68.7866	-65.0024	-59.7229	-62.3169	-21.0266	-41.6565
63.85	-93.5669										63.75	-68.6951	-64.9719	-60.0281	-62.1643	-23.8953	-40.9546
63.9	-93.4448										63.8	-68.5425	-65.2161	-59.9365	-62.3779	-26.2756	-39.917
63.95	-93.1396										63.85	-68.8171	-65.1245	-59.5398	-62.1338	-28.4424	-39.0625
64	-92.4072										63.9	-68.6645	-64.9414	-59.9365	-62.3169	-31.1279	-38.2385
64.05	-91.6138										63.95	-68.512	-64.8498	-59.845	-62.2559	-33.5693	-36.7126
64.1	-90.6982										64	-68.4814	-65.094	-59.5703	-61.9202	-35.8276	-34.4543
64.15	-89.5996										64.05	-68.6645	-65.0024	-59.9365	-62.439	-37.7808	-31.9824
64.2	-88.501										64.1	-68.573	-64.8804	-59.6619	-62.1948	-40.4968	-28.1677
64.25	-87.5244										64.15	-68.3899	-64.6973	-59.8144	-62.2253	-42.5415	-22.6746
64.3	-86.3647										64.2	-68.7256	-65.0635	-59.7839	-62.2253	-44.342	-15.1367
64.35	-85.1746										64.25	-68.4814	-64.9414	-59.4788	-62.0728	-46.2341	-7.04956
64.4	-83.8623										64.3	-68.3899	-64.7583	-59.7229	-62.3474	-48.4314	1.98364
64.45	-82.4585										64.35	-68.512	-64.6057	-59.5398	-62.2559	-50.2014	11.5051
64.5	-81.1462										64.4	-68.3594	-64.8804	-59.7229	-61.9507	-51.6663	20.9351
64.55	-79.6814										64.45	-68.573	-64.9109	-59.5093	-62.2864	-53.1311	29.0222
64.6	-78.2165										64.5	-68.4204	-64.8193	-59.6008	-62.1948	-54.9011	35.8276
64.65	-76.9043										64.55	-68.1457	-64.4836	-59.7229	-61.9812	-56.1829	41.5039
64.7	-75.6226										64.6	-68.4814	-64.6667	-59.4177	-62.1948	-57.4341	45.7458
64.75	-74.3103										64.65	-68.2678	-64.7888	-59.6313	-62.0728	-58.5022	48.5535
64.8	-73.1201										64.7	-68.3288	-64.6667	-59.2346	-62.0117	-59.8144	49.8047
64.85	-71.7773										64.75	-68.2678	-64.4531	-59.7229	-62.2253	-60.791	50.0793
64.9	-70.4651										64.8	-67.8711	-64.4226	-59.4482	-61.9812	-61.5845	49.8047
64.95	-69.2444										64.85	-68.2678	-64.6667	-59.6008	-62.1033	-62.3779	48.8281
65	-67.8711										64.9	-68.1152	-64.5447	-59.4788	-62.2253	-63.5071	46.7834
65.05	-66.6199										64.95	-68.0237	-64.4836	-59.3872	-62.0728	-64.2395	44.342
65.1	-65.2771										65	-68.0847	-64.209	-59.5703	-62.1948	-64.9109	41.687
65.15	-64.27										65.05	-67.8101	-64.5752	-59.1431	-62.2253	-65.155	39.0015
65.2	-63.2019										65.1	-68.0542	-64.6057	-59.5093	-62.1033	-66.1316	35.7971
65.25	-62.3474										65.15	-67.9932	-64.4531	-59.3567	-62.2559	-66.803	31.9519
65.3	-61.2488										65.2	-67.7795	-64.2395	-59.5093	-62.1948	-67.1997	28.1677
65.35	-60.0586										65.25	-68.0237	-64.209	-59.4482	-61.8896	-67.3828	24.4446
65.4	-58.9905										65.3	-67.8406	-64.4226	-59.1431	-62.2559	-67.8406	20.6299
65.45	-58.0444										65.35	-67.8101	-64.3921	-59.4482	-62.1338	-68.4814	16.7847
65.5	-56.9763										65.4	-67.8101	-64.27	-59.2957	-61.9507	-68.7561	12.4817
65.55	-55.9692										65.45	-67.5964	-64.1785	-59.3567	-62.1643	-69.0918	8.60596
65.6	-54.7485										65.5	-67.8101	-63.9954	-59.3567	-62.1948	-69.1528	4.76074
65.65	-53.8635										65.55	-67.7185	-64.331	-59.082	-61.9202	-69.7021	1.12915
65.7	-53.1311										65.6	-67.4438	-64.1785	-59.4482	-62.1033	-70.0684	-2.44141
65.75	-52.2461										65.65	-67.688	-64.1785	-59.3567	-62.1338	-70.3125	-6.22559
65.8	-51.2085										65.7	-67.6269	-64.1174	-59.021	-61.8286	-70.3735	-9.67407
65.85	-50.2014										65.75	-67.2913	-63.9648	-59.3872	-62.1643	-70.5566	-12.9395
65.9	-49.1028										65.8	-67.6575	-64.2395	-59.2651	-62.1338	-71.0144	-16.1133
65.95	-48.0347										65.85	-67.5049	-64.209	-59.2041	-61.9507	-71.228	-19.0124
66	-47.0886										65.9	-67.3218	-64.209	-59.3262	-62.0728	-71.2585	-22.2168
66.05	-45.8069										65.95	-67.5354	-64.0259	-59.1125	-62.1643	-71.2891	-25.1465
66.1	-44.22										66	-67.4744	-63.8428	-59.2651	-62.0728	-71.5027	-27.9236
66.15	-42.2058										66.05	-67.2913	-64.0259	-59.2957	-61.9812	-71.8689	-30.6091
66.2	-39.8254										66.1	-67.3828	-64.1785	-59.021	-62.1338	-71.9604	-32.959
66.25	-35.7666										66.15	-67.4438	-64.0869	-59.1736	-62.0117	-72.113	-35.5835
66.3	-29.6326										66.2	-67.1997	-63.8428	-59.2041	-61.8286	-72.052	-38.1775
66.35	-22.0032										66.25	-67.1692	-63.7512	-58.8989	-62.1643	-72.1435	-40.5579
66.4	-11.9324										66.3	-67.4133	-63.7207	-59.1736	-62.0728	-72.5403	-42.7856
66.45	-0.732422										66.35	-67.2913	-63.9648	-59.1431	-61.7981	-72.6623	-44.7998
66.5	10.1318										66.4	-67.0166	-63.9648	-58.8989	-62.1033	-72.6929	-46.6614
66.55	20.5688										66.45	-67.3218	-63.7817	-59.2957	-62.1338	-72.8149	-49.0417
66.6	29.8462										66.5	-67.1692	-63.6291	-59.1431	-61.9507	-72.6929	-50.9644
66.65	36.0107										66.55	-66.8335	-63.5071	-58.8684	-62.0117	-73.0286	-52.7039
66.7	39.917										66.6	-67.1387	-63.5071	-59.2651	-62.2253	-73.2727	-54.4128
66.75	40.9546										66.65	-67.0776	-63.6902	-59.2346	-62.0422	-73.3337	-55.9692
66.8	38.5437										66.7	-66.925	-63.6902	-58.96	-61.8896	-73.3643	-57.251
66.85	33.8745										66.75	-66.8945	-63.6902	-59.2346	-62.2253	-73.1811	-58.8684
66.9	27.0081										66.8	-67.1387	-63.5681	-59.1125	-62.2253	-73.3337	-60.1196
66.95	18.0969										66.85	-66.9556	-63.446	-58.96	-61.9202	-73.6694	-61.3098
67	8.45337										66.9	-66.6504	-63.446	-59.1431	-62.0728	-73.761	-62.2559
67.05	-2.31934										66.95	-66.925	-63.6291	-59.1125	-62.0728	-73.761	-62.9578
67.1	-12.97										67	-66.8945	-63.6597	-58.8684	-62.0422	-73.6389	-64.209
67.15	-23.2849										67.05	-66.6504	-63.4766	-59.021	-61.7676	-73.6389	-65.0635
67.2	-33.844										67.1	-66.6199	-63.4155	-59.0515	-62.1643	-73.7305	-65.6738
67.25	-43.1519										67.15	-66.7419	-63.3545	-58.9294	-62.0117	-74.0356	-66.2231
67.3	-51.5442										67.2	-66.7114	-63.1409	-58.96	-61.7981	-74.0356	-67.1081
67.35	-59.7229										67.25	-66.3757	-63.3545	-59.0515	-61.8896	-74.0356	-67.4744
67.4	-66.6504										67.3	-66.5588	-63.385	-59.021	-61.9507	-74.0662	-67.9321
67.45	-72.3877										67.35	-66.5283	-63.324	-58.8379	-61.8896	-73.8525	-68.573
67.5	-77.7893										67.4	-66.4978	-63.2935	-59.0515	-61.615	-73.9136	-68.8171
67.55	-81.8787										67.45	-66.2231	-63.2629	-58.96	-62.1338	-74.1577	-69.2749
67.6	-85.083										67.5	-66.5283	-63.1103	-58.7158	-62.0422	-74.3103	-69.7632
67.65	-87.8906										67.55	-66.4368	-62.8967	-59.021	-61.7981	-74.2798	-69.7327
67.7	-90.0574										67.6	-66.4062	-63.2324	-58.9294	-61.7371	-74.1272	-70.343
67.75	-91.4612										67.65	-66.2842	-63.2019	-58.6548	-62.0117	-74.0356	-70.4956
67.8	-92.2851										67.7	-66.4368	-63.1409	-58.8989	-61.9812	-73.9746	-70.6482
67.85	-93.2312										67.75	-66.3757	-63.0798	-58.9294	-61.7371	-74.1272	-71.0449
67.9	-93.2922										67.8	-66.1316	-62.8967	-58.8074	-61.7065	-74.3103	-70.9534
67.95	-93.2007										67.85	-66.2231	-63.1103	-58.6853	-61.8896	-74.1577	-71.4722
68	-92.7124										67.9	-66.3452	-63.0493	-58.8379	-61.7676	-74.1577	-71.5637
68.05	-92.5293										67.95	-66.2231	-63.0493	-58.7463	-61.5234	-74.0356	-71.8384
68.1	-91.6748										68	-65.918	-62.6526	-58.4412	-61.6455	-74.0967	-72.113
68.15	-90.6982										68.05	-66.1011	-63.0798	-58.8379	-61.7065	-74.3103	-72.052
68.2	-89.5996										68.1	-66.1926	-62.9883	-58.6548	-61.7981	-74.2798	-72.3267
68.25	-88.8672										68.15	-66.1011	-62.6526	-58.6548	-61.4624	-74.1882	-72.3267
68.3	-87.677										68.2	-65.7654	-62.9272	-58.6243	-61.6455	-74.0662	-72.6318
68.35	-86.3647										68.25	-65.979	-62.8662	-58.6548	-61.7371	-74.2798	-72.6929
68.4	-84.8999										68.3	-66.1316	-62.5	-58.6548	-61.676	-74.2187	-72.937
68.45	-83.8318										68.35	-66.0095	-62.7747	-58.3801	-61.5234	-74.0051	-73.1506
68.5	-82.5806										68.4	-65.7349	-62.561	-58.5632	-61.4319	-74.4018	-72.998
68.55	-81.1462										68.45	-65.918	-62.5915	-58.5937	-61.676	-74.1882	-73.3032
68.6	-79.5898										68.5	-66.0095	-62.7441	-58.4717	-61.676	-73.9136	-73.2422
68.65	-78.4912										68.55	-65.8569	-62.439	-58.3496	-61.4929	-74.3103	-73.4558
68.7	-77.2095										68.6	-65.7043	-62.6831	-58.6243	-61.3098	-74.0967	-73.6389
68.75	-75.8667										68.65	-65.7654	-62.7136	-58.5632	-61.554	-74.0967	-73.4558
68.8	-74.2493										68.7	-65.918	-62.439	-58.197	-61.4929	-74.1577	-73.7915
68.85	-73.0286										68.75	-65.7654	-62.5	-58.3496	-61.3403	-73.7915	-73.8525
68.9	-72.0215										68.8	-65.6128	-62.1338	-58.5632	-61.2488	-74.1577	-73.6389
68.95	-70.6482										68.85	-65.4907	-62.5	-58.4717	-61.3708	-74.0051	-74.0356
69	-69.2749										68.9	-65.6738	-62.4084	-58.197	-61.4624	-73.9746	-73.9746
69.05	-67.8711										68.95	-65.7043	-62.2864	-58.4106	-61.3708	-74.0051	-73.9441
69.1	-67.0166										69	-65.6128	-62.3169	-58.5022	-61.1267	-73.8525	-74.2798
69.15	-65.8569										69.05	-65.2466	-62.0422	-58.4106	-61.1572	-74.1272	-74.1577
69.2	-64.6362										69.1	-65.4907	-62.3474	-58.3191	-61.3098	-73.9441	-74.3408
69.25	-63.4155										69.15	-65.6433	-62.1338	-58.5632	-61.3708	-74.0662	-74.3713
69.3	-62.5										69.2	-65.5518	-62.1643	-58.5022	-61.2488	-74.0967	-74.3103
69.35	-61.7065										69.25	-65.3686	-62.1948	-58.5327	-60.9436	-73.822	-74.4934
69.4	-60.6079										69.3	-65.2161	-61.9812	-58.1055	-61.2488	-74.1272	-74.4934
69.45	-59.4482										69.35	-65.5212	-62.2559	-58.5022	-61.3403	-73.8525	-74.2798
69.5	-58.4412										69.4	-65.4602	-62.1643	-58.4412	-61.3098	-74.0662	-74.585
69.55	-57.7698										69.45	-65.3686	-61.8896	-58.3801	-61.0657	-73.9746	-74.5544
69.6	-56.8848										69.5	-65.1855	-62.1948	-58.1665	-60.9436	-73.7305	-74.4018
69.65	-55.8472										69.55	-65.2161	-62.1033	-58.3801	-61.1572	-74.0051	-74.585
69.7	-54.8401										69.6	-65.4297	-61.8286	-58.3191	-61.1572	-73.7915	-74.646
69.75	-54.1382										69.65	-65.2771	-62.0117	-58.2886	-61.0962	-73.883	-74.5544
69.8	-53.3752										69.7	-65.2466	-61.9202	-58.0444	-61.0046	-73.9441	-74.6155
69.85	-52.5513										69.75	-65.0635	-61.7981	-58.2581	-60.7605	-73.6694	-74.6765
69.9	-51.5747										69.8	-65.0635	-62.1033	-58.3496	-61.0046	-73.9441	-74.4934
69.95	-50.6592										69.85	-65.2466	-61.7981	-58.4106	-61.0046	-74.0356	-74.7375
70	-50.1709										69.9	-65.094	-61.7065	-58.0749	-60.9436	-73.6694	-74.707
70.05	-49.2859										69.95	-65.155	-61.9812	-58.1055	-60.6995	-73.9441	-74.6155
70.1	-48.2788										70	-65.033	-61.8286	-58.3496	-60.7605	-73.9136	-74.585
70.15	-47.1497										70.05	-64.9109	-61.7065	-58.2581	-60.9131	-73.6999	-74.8291
70.2	-46.051										70.1	-65.155	-61.8896	-58.1055	-60.8826	-74.0356	-74.7375
70.25	-44.9219										70.15	-65.094	-61.9202	-57.8918	-60.6689	-73.8525	-74.4934
70.3	-43.1519										70.2	-65.094	-61.676	-58.1665	-60.73	-73.5474	-74.7681
70.35	-40.8325										70.25	-64.8804	-61.9202	-58.1665	-60.852	-73.9441	-74.7986
70.4	-37.1704										70.3	-64.7278	-61.7981	-58.1055	-60.6384	-73.7915	-74.4629
70.45	-32.1045										70.35	-64.8193	-61.5845	-57.8308	-60.6995	-73.6389	-74.707
70.5	-25.1465										70.4	-64.9109	-61.9202	-57.8613	-60.791	-73.7915	-74.6155
70.55	-15.9302										70.45	-64.8498	-61.7676	-58.0444	-60.5774	-73.822	-74.4629
70.6	-5.21851										70.5	-64.7888	-61.4319	-58.0139	-60.7605	-73.5779	-74.6155
70.65	5.88989										70.55	-64.4836	-61.6455	-57.8613	-60.6079	-73.7915	-74.646
70.7	16.7236										70.6	-64.4531	-61.6455	-57.6172	-60.4553	-73.6999	-74.5544
70.75	25.9705										70.65	-64.7278	-61.5234	-57.9224	-60.6689	-73.4558	-74.4629
70.8	33.4167										70.7	-64.7278	-61.4929	-58.1055	-60.2417	-73.6999	-74.7986
70.85	38.2385										70.75	-64.6057	-61.615	-57.9224	-60.73	-73.6694	-74.646
70.9	40.3137										70.8	-64.6973	-61.554	-57.7393	-60.5164	-73.4863	-74.3713
70.95	39.5508										70.85	-64.3616	-61.3098	-57.6782	-60.6995	-73.5474	-74.7375
71	35.614										70.9	-64.3616	-61.6455	-57.9224	-60.6384	-73.6999	-74.7681
71.05	29.3274										70.95	-64.5142	-61.554	-57.9834	-60.5774	-73.5474	-74.585
71.1	21.4539										71	-64.6362	-61.3708	-57.8003	-60.6384	-73.3643	-74.4934
71.15	12.0239										71.05	-64.6057	-61.5234	-57.5867	-60.3638	-73.5474	-74.7375
71.2	2.07519										71.1	-64.4226	-61.4624	-57.4951	-60.6079	-73.5168	-74.6155
71.25	-8.42285										71.15	-64.27	-61.3708	-57.7698	-60.2722	-73.1811	-74.3713
71.3	-19.2261										71.2	-64.1785	-61.2183	-57.7393	-60.4858	-73.5168	-74.6765
71.35	-29.3579										71.25	-64.3921	-61.5234	-57.6782	-60.2417	-73.4863	-74.5544
71.4	-38.9404										71.3	-64.5142	-61.4319	-57.4951	-60.4858	-73.1811	-74.4018
71.45	-47.821										71.35	-64.2395	-61.0657	-57.373	-60.1196	-73.3948	-74.4629
71.5	-55.6946										71.4	-64.2395	-61.2488	-57.4951	-60.4248	-73.3948	-74.6765
71.55	-63.0188										71.45	-64.1785	-61.3403	-57.5867	-60.2112	-73.2727	-74.5239
71.6	-69.458										71.5	-63.9954	-61.1877	-57.5561	-60.4248	-73.0896	-74.1882
71.65	-74.9512										71.55	-64.1174	-60.8826	-57.6172	-60.2112	-73.4558	-74.585
71.7	-79.3762										71.6	-64.1479	-61.2183	-57.4341	-60.2112	-73.3337	-74.5544
71.75	-83.1604										71.65	-64.3616	-61.2793	-57.1289	-60.3027	-72.9675	-74.4018
71.8	-86.029										71.7	-64.1479	-60.9741	-57.4341	-60.0891	-73.2117	-74.2798
71.85	-88.1958										71.75	-64.209	-61.0046	-57.5561	-60.4248	-73.2727	-74.6765
71.9	-89.9963										71.8	-64.0564	-61.2488	-57.4646	-60.1196	-73.0896	-74.4934
71.95	-91.4917										71.85	-63.9038	-61.2183	-57.2815	-60.2417	-72.937	-74.2493
72	-92.4072										71.9	-63.9954	-61.0352	-57.0373	-60.2722	-73.1811	-74.2187
72.05	-92.8039										71.95	-63.9954	-61.0657	-57.2815	-60.0586	-73.1201	-74.5239
72.1	-92.865										72	-64.0564	-61.1877	-57.2815	-60.1807	-72.7844	-74.3713
72.15	-92.7734										72.05	-64.0564	-61.1267	-57.1899	-59.9365	-72.9675	-74.1272
72.2	-92.3767										72.1	-63.8123	-60.73	-56.9458	-60.1501	-72.937	-74.2493
72.25	-91.6443										72.15	-63.8123	-61.0352	-57.1899	-60.0586	-72.9675	-74.2798
72.3	-90.7898										72.2	-63.9648	-61.0046	-57.1289	-59.845	-72.6623	-74.2493
72.35	-90.0879										72.25	-63.8733	-61.0046	-56.8848	-60.0281	-72.9675	-74.0051
72.4	-89.2944										72.3	-63.5071	-60.6689	-57.1899	-59.845	-72.7844	-74.2187
72.45	-88.2873										72.35	-63.7512	-60.9741	-57.0679	-59.967	-72.6318	-74.2187
72.5	-87.0666										72.4	-63.8123	-60.9436	-56.9458	-59.967	-72.6318	-74.3103
72.55	-85.8154										72.45	-63.6597	-60.8826	-57.0679	-59.6008	-72.7844	-74.0051
72.6	-84.6252										72.5	-63.7512	-60.73	-56.7932	-59.9365	-72.7234	-74.1272
72.65	-83.3435										72.55	-63.8123	-60.8826	-57.0373	-59.967	-72.4487	-74.3103
72.7	-81.9702										72.6	-63.5986	-60.9131	-57.0068	-59.7229	-72.6318	-74.2187
72.75	-80.5969										72.65	-63.6902	-60.8826	-56.8542	-59.906	-72.7539	-74.0356
72.8	-79.3152										72.7	-63.7817	-60.73	-56.9458	-59.6619	-72.6013	-73.9746
72.85	-78.0945										72.75	-63.446	-60.8826	-56.5186	-59.8144	-72.3572	-74.1577
72.9	-76.9043										72.8	-63.6902	-60.9131	-57.0068	-59.845	-72.5403	-74.1272
72.95	-75.6531										72.85	-63.5071	-60.8826	-56.7322	-59.4177	-72.6623	-73.9136
73	-74.3408										72.9	-63.5071	-60.6384	-56.8848	-59.7839	-72.4487	-73.822
73.05	-73.0591										72.95	-63.6291	-60.6384	-56.7932	-59.7229	-72.1435	-74.0356
73.1	-71.7163										73	-63.2324	-60.852	-56.5186	-59.4177	-72.3267	-73.9441
73.15	-70.4346										73.05	-63.6291	-60.73	-56.8542	-59.6924	-72.3877	-73.8525
73.2	-69.0918										73.1	-63.2629	-60.5469	-56.366	-59.5703	-72.3877	-73.6389
73.25	-67.8101										73.15	-63.385	-60.4553	-56.8237	-59.3872	-72.0825	-73.883
73.3	-66.6199										73.2	-63.385	-60.6689	-56.5796	-59.6313	-72.0825	-73.9136
73.35	-65.2771										73.25	-63.1103	-60.5774	-56.7932	-59.4482	-72.3267	-73.9136
73.4	-64.2395										73.3	-63.385	-60.5469	-56.7017	-59.4177	-72.2046	-73.6694
73.45	-63.446										73.35	-63.2019	-60.3638	-56.3965	-59.5093	-72.113	-73.6694
73.5	-62.3169										73.4	-63.2324	-60.4553	-56.6406	-59.3872	-71.991	-73.9441
73.55	-61.2488										73.45	-63.2324	-60.6384	-56.366	-59.5398	-72.2351	-73.8525
73.6	-60.2112										73.5	-62.8662	-60.4553	-56.6711	-59.3567	-72.1435	-73.7915
73.65	-59.1736										73.55	-63.3545	-60.4553	-56.5491	-59.2041	-71.9299	-73.4253
73.7	-58.1665										73.6	-63.0798	-60.2417	-56.2744	-59.4788	-71.7773	-73.6694
73.75	-57.1289										73.65	-62.8357	-60.3943	-56.5186	-59.4482	-72.0825	-73.761
73.8	-56.0913										73.7	-63.1103	-60.4553	-56.3049	-59.2041	-71.991	-73.7305
73.85	-55.2063										73.75	-62.8967	-60.3638	-56.4575	-59.3567	-71.9299	-73.5474
73.9	-54.2297										73.8	-62.8967	-60.1807	-56.3965	-59.3872	-71.5942	-73.3948
73.95	-53.3752										73.85	-62.9578	-59.967	-55.9692	-59.1431	-71.7468	-73.6389
74	-52.5513										73.9	-62.6831	-60.2722	-56.488	-59.3567	-71.8689	-73.6084
74.05	-51.8494										73.95	-62.7441	-60.2417	-56.3354	-59.3567	-71.8384	-73.6084
74.1	-51.0559										74	-62.8357	-60.2722	-56.0913	-59.0515	-71.6553	-73.3337
74.15	-49.9268										74.05	-62.5915	-59.9976	-56.366	-59.3262	-71.4722	-73.3337
74.2	-48.9807										74.1	-62.7747	-59.8755	-56.2439	-59.2957	-71.8079	-73.6084
74.25	-47.699										74.15	-62.6831	-60.0891	-56.1829	-59.0515	-71.7163	-73.5168
74.3	-46.7529										74.2	-62.5	-60.1807	-56.2744	-59.2957	-71.6553	-73.4863
74.35	-45.6543										74.25	-62.7136	-60.0891	-56.1523	-59.2957	-71.4416	-73.1811
74.4	-43.8843										74.3	-62.6831	-59.9365	-56.1523	-59.1431	-71.4722	-73.2117
74.45	-41.748										74.35	-62.5	-59.7534	-56.2439	-59.082	-71.6858	-73.4863
74.5	-38.7878										74.4	-62.561	-59.9976	-55.9692	-59.2041	-71.4416	-73.3948
74.55	-34.6985										74.45	-62.6221	-60.0891	-56.0303	-59.082	-71.4416	-73.3337
74.6	-28.4119										74.5	-62.439	-59.9976	-56.1218	-59.021	-71.2585	-73.1506
74.65	-19.6533										74.55	-62.3474	-59.845	-55.8472	-59.2346	-71.3501	-73.0591
74.7	-9.79614										74.6	-62.5305	-59.7534	-56.0608	-58.96	-71.5027	-73.2422
74.75	1.19019										74.65	-62.3474	-59.6924	-55.9387	-58.8379	-71.3196	-73.2117
74.8	12.6038										74.7	-62.1643	-59.967	-55.7861	-59.1125	-71.2585	-73.1506
74.85	22.583										74.75	-62.439	-59.8755	-55.9998	-58.9905	-71.0449	-73.0896
74.9	31.0974										74.8	-62.3169	-59.8144	-55.9387	-58.6853	-71.0144	-72.876
74.95	37.323										74.85	-62.0117	-59.7229	-55.8472	-58.9905	-71.3196	-72.9675
75	40.3442										74.9	-62.2864	-59.5398	-55.8777	-59.0515	-71.228	-73.1506
75.05	40.6799										74.95	-62.1948	-59.6924	-56.0303	-58.7158	-71.1975	-73.1811
75.1	38.208										75	-62.0422	-59.7534	-55.8166	-58.8074	-71.0144	-73.0896
75.15	32.8064										75.05	-62.1338	-59.7839	-55.8777	-58.8989	-70.8313	-72.876
75.2	25.5127										75.1	-62.1948	-59.7229	-55.9692	-58.8074	-71.0754	-72.7844
75.25	16.9067										75.15	-61.9812	-59.5703	-55.7861	-58.6243	-71.1059	-73.0591
75.3	6.68335										75.2	-61.8591	-59.4177	-55.8166	-58.8684	-71.0144	-73.0896
75.35	-3.72314										75.25	-62.1033	-59.6008	-55.9387	-58.7769	-70.8923	-72.9065
75.4	-14.1296										75.3	-62.1033	-59.6924	-55.7251	-58.5327	-70.7092	-72.7539
75.45	-24.8108										75.35	-61.7676	-59.6008	-55.5725	-58.7769	-70.7092	-72.7844
75.5	-34.6374										75.4	-61.9507	-59.5703	-55.8472	-58.8074	-70.8923	-72.937
75.55	-43.7927										75.45	-61.9507	-59.4177	-55.7556	-58.5327	-70.8008	-72.7844
75.6	-52.6123										75.5	-61.7981	-59.2957	-55.4504	-58.4717	-70.8313	-72.4182
75.65	-60.1807										75.55	-61.615	-59.2957	-55.7251	-58.7463	-70.6177	-72.7844
75.7	-66.6504										75.6	-61.8896	-59.3872	-55.7861	-58.7158	-70.5261	-72.7844
75.75	-72.876										75.65	-61.7676	-59.3567	-55.5115	-58.3496	-70.5261	-72.4487
75.8	-77.7893										75.7	-61.676	-59.2957	-55.7251	-58.5937	-70.6482	-72.8149
75.85	-81.665										75.75	-61.6455	-59.3872	-55.7556	-58.6853	-70.6482	-72.5708
75.9	-85.2356										75.8	-61.7676	-59.1431	-55.5725	-58.4717	-70.6787	-72.5098
75.95	-87.8296										75.85	-61.676	-58.9294	-55.5725	-58.2581	-70.404	-72.6623
76	-89.8132										75.9	-61.4624	-59.2041	-55.7556	-58.5937	-70.1904	-72.2961
76.05	-91.0644										75.95	-61.676	-59.2651	-55.6335	-58.5937	-70.282	-72.6623
76.1	-92.3462										76	-61.5845	-59.2041	-55.4199	-58.4717	-70.4956	-72.5403
76.15	-92.8039										76.05	-61.5234	-59.1125	-55.7251	-58.2886	-70.4956	-72.4792
76.2	-92.926										76.1	-61.4014	-58.8989	-55.6335	-58.4717	-70.3735	-72.5098
76.25	-92.926										76.15	-61.6455	-58.9905	-55.3894	-58.4106	-70.1904	-72.2046
76.3	-92.7429										76.2	-61.4929	-59.082	-55.3589	-58.1055	-70.0073	-72.5098
76.35	-92.1631										76.25	-61.3403	-58.8989	-55.542	-58.3801	-70.0989	-72.1435
76.4	-91.4612										76.3	-61.1877	-58.7158	-55.4199	-58.3191	-70.2209	-72.3877
76.45	-90.5456										76.35	-61.4624	-58.8379	-55.1147	-58.2275	-70.0989	-72.2351
76.5	-89.8743										76.4	-61.4929	-58.9294	-55.4199	-57.9834	-70.0073	-72.2351
76.55	-88.6841										76.45	-61.1877	-58.7769	-55.4504	-58.2275	-69.9158	-72.3267
76.6	-87.5244										76.5	-61.0962	-58.5327	-55.2673	-58.2886	-70.0684	-71.8689
76.65	-85.9985										76.55	-61.3708	-58.7463	-55.2063	-58.197	-70.0378	-72.2351
76.7	-85.0525										76.6	-61.2183	-58.5632	-55.3589	-57.9529	-69.6411	-71.8384
76.75	-83.9539										76.65	-61.1267	-58.5022	-55.2673	-58.197	-70.0378	-72.1435
76.8	-82.55										76.7	-61.0046	-58.6243	-55.0537	-58.2581	-69.9768	-71.9604
76.85	-81.1157										76.75	-61.3403	-58.4106	-55.2063	-58.1055	-69.5496	-71.9299
76.9	-79.7729										76.8	-61.2793	-58.6243	-55.2063	-57.8308	-69.7937	-72.0825
76.95	-78.5828										76.85	-61.0657	-58.4412	-55.1147	-58.1665	-69.9158	-71.6858
77	-77.2095										76.9	-60.9131	-58.3191	-54.9316	-58.0444	-69.4275	-72.052
77.05	-75.7751										76.95	-61.2488	-58.5022	-55.2063	-58.0444	-69.7632	-71.8079
77.1	-74.2798										77	-61.1572	-58.3191	-55.0232	-57.7698	-69.5801	-71.6858
77.15	-73.3032										77.05	-60.9741	-58.3801	-54.8401	-57.8613	-69.5496	-71.8384
77.2	-72.113										77.1	-60.73	-58.2886	-54.8401	-58.0139	-69.5801	-71.5027
77.25	-70.6177										77.15	-61.0046	-58.2275	-55.0842	-57.9224	-69.3359	-71.7468
77.3	-69.2749										77.2	-61.0046	-58.2581	-54.9316	-57.7698	-69.5801	-71.7163
77.35	-67.9626										77.25	-60.9436	-57.9529	-54.779	-57.7393	-69.3054	-71.3196
77.4	-67.1081										77.3	-60.6689	-58.2275	-54.8706	-57.8308	-69.519	-71.7773
77.45	-65.8874										77.35	-60.7605	-58.0139	-54.9927	-57.7698	-69.4885	-71.5332
77.5	-64.7278										77.4	-60.852	-58.0444	-54.9316	-57.6477	-69.1833	-71.3806
77.55	-63.5376										77.45	-60.73	-58.0139	-54.8706	-57.5867	-69.4275	-71.5332
77.6	-62.5305										77.5	-60.6384	-57.7698	-54.8401	-57.8308	-69.2139	-71.5332
77.65	-61.7065										77.55	-60.4858	-58.0444	-55.1758	-57.8003	-69.458	-71.4111
77.7	-60.6384										77.6	-60.8215	-57.9834	-54.8706	-57.7698	-69.1223	-71.4416
77.75	-59.6924										77.65	-60.73	-57.8613	-54.718	-57.5867	-69.1528	-71.2891
77.8	-58.5632										77.7	-60.6079	-58.0139	-54.718	-57.5867	-69.2444	-71.4416
77.85	-57.7698										77.75	-60.3943	-57.8308	-54.9622	-57.7087	-68.9392	-71.4111
77.9	-56.9763										77.8	-60.5164	-57.8918	-54.8706	-57.5256	-69.2139	-71.167
77.95	-56.0913										77.85	-60.6689	-57.9529	-54.657	-57.5256	-69.0002	-71.2585
78	-55.0842										77.9	-60.5164	-57.6477	-54.4739	-57.312	-68.8782	-71.2585
78.05	-54.1687										77.95	-60.4248	-57.8003	-54.718	-57.4951	-69.0613	-70.9534
78.1	-53.5889										78	-60.2112	-57.8308	-54.8096	-57.5867	-68.7256	-71.1975
78.15	-52.8259										78.05	-60.3027	-57.4646	-54.7485	-57.4036	-68.9697	-71.1365
78.2	-51.9409										78.1	-60.3943	-57.8613	-54.4128	-57.373	-68.9697	-70.8313
78.25	-51.0559										78.15	-60.3027	-57.7393	-54.718	-57.1899	-68.634	-71.0754
78.3	-50.1404										78.2	-60.1196	-57.4341	-54.779	-57.373	-69.0002	-71.0754
78.35	-49.53										78.25	-59.967	-57.7698	-54.7485	-57.4951	-68.8476	-70.8313
78.4	-48.7061										78.3	-60.0281	-57.6477	-54.4739	-57.5561	-68.6035	-70.9839
78.45	-47.7295										78.35	-60.2722	-57.4341	-54.4739	-57.3425	-68.9087	-71.0449
78.5	-46.4477										78.4	-60.0891	-57.6782	-54.8401	-57.2205	-68.8171	-70.8923
78.55	-45.166										78.45	-60.1501	-57.7087	-54.5654	-57.4646	-68.512	-70.8313
78.6	-44.0979										78.5	-59.9365	-57.312	-54.5349	-57.4036	-68.7561	-70.8923
78.65	-42.4499										78.55	-59.906	-57.5561	-54.3213	-57.0373	-68.512	-70.7703
78.7	-40.0085										78.6	-60.0891	-57.5256	-54.5654	-57.3425	-68.512	-70.6787
78.75	-36.2854										78.65	-60.0281	-57.4341	-54.657	-57.251	-68.5425	-70.8313
78.8	-30.7007										78.7	-59.9976	-57.4951	-54.5654	-56.8542	-68.3899	-70.6787
78.85	-23.5596										78.75	-59.7229	-57.5256	-54.3213	-57.2815	-68.3288	-70.4956
78.9	-14.3738										78.8	-59.5398	-57.4646	-54.1687	-57.1899	-68.3899	-70.7397
78.95	-3.60107										78.85	-59.8144	-57.312	-54.5044	-56.8542	-68.3899	-70.6177
79	7.44629										78.9	-59.8755	-57.5561	-54.5349	-57.0984	-68.1457	-70.2209
79.05	17.9749										78.95	-59.8144	-57.4646	-54.4434	-56.8848	-68.3594	-70.6177
79.1	27.1912										79	-59.6313	-57.0984	-54.3823	-57.0984	-68.3594	-70.5566
79.15	34.0271										79.05	-59.5398	-57.4951	-54.2908	-56.9458	-67.9932	-70.1904
79.2	38.3301										79.1	-59.6008	-57.4036	-54.3213	-56.8848	-68.2678	-70.4346
79.25	39.7949										79.15	-59.7534	-57.1594	-54.4434	-57.0984	-68.2373	-70.4346
79.3	38.3301										79.2	-59.6619	-57.2815	-54.4434	-56.7017	-67.9626	-70.404
79.35	34.4543										79.25	-59.6313	-57.3425	-54.3518	-56.8848	-68.2678	-70.282
79.4	28.1372										79.3	-59.6313	-57.2815	-54.0771	-56.3965	-68.1457	-70.404
79.45	19.7754										79.35	-59.4788	-57.1289	-54.2297	-56.9153	-67.8101	-70.282
79.5	10.2539										79.4	-59.3262	-57.373	-54.3518	-56.6101	-68.1457	-70.0684
79.55	0.183105										79.45	-59.5398	-57.2815	-54.2603	-56.8237	-68.0542	-70.3735
79.6	-10.0708										79.5	-59.6619	-57.0679	-54.1687	-56.5491	-67.8406	-70.3125
79.65	-20.2637										79.55	-59.4788	-57.2815	-53.9856	-56.7017	-67.9016	-69.9463
79.7	-30.2429										79.6	-59.4482	-57.251	-54.0466	-56.5796	-68.0237	-70.0684
79.75	-39.8254										79.65	-59.1736	-57.0984	-54.1992	-56.7322	-67.7795	-70.1904
79.8	-48.4924										79.7	-59.1736	-57.0068	-54.0771	-56.5796	-67.7185	-70.0684
79.85	-56.3965										79.75	-59.2957	-57.2815	-54.0161	-56.2744	-67.9321	-69.7937
79.9	-63.4155										79.8	-59.3872	-57.2205	-53.894	-56.5796	-67.8406	-70.0989
79.95	-69.5496										79.85	-59.2346	-56.9458	-53.833	-56.1523	-67.6575	-70.0378
80	-74.646										79.9	-59.1736	-57.0068	-54.0466	-56.5186	-67.8406	-69.8242
80.05	-79.071										79.95	-59.2041	-57.2205	-54.0771	-56.1829	-67.8406	-69.7937
80.1	-83.0078										80	-58.9294	-57.0373	-54.0161	-56.5796	-67.5964	-69.9463
80.15	-86.0901										80.05	-58.8989	-56.7017	-53.9551	-56.4575	-67.688	-69.8547
80.2	-88.3484										80.1	-59.082	-57.0373	-53.8025	-56.3049	-67.8711	-69.6411
80.25	-89.9963										80.15	-59.2346	-57.0373	-53.8025	-56.3965	-67.7185	-69.7937
80.3	-91.217										80.2	-59.1431	-56.9153	-53.9856	-56.0608	-67.4133	-69.7632
80.35	-92.041										80.25	-59.0515	-56.7017	-53.9856	-56.488	-67.749	-69.6411
80.4	-92.3767										80.3	-58.96	-57.0068	-53.7415	-56.1829	-67.6269	-69.458
80.45	-92.3767										80.35	-58.7769	-56.9458	-53.6499	-56.1829	-67.3828	-69.7021
80.5	-92.2546										80.4	-59.021	-56.7627	-53.9246	-56.2439	-67.3523	-69.6106
80.55	-92.0105										80.45	-59.021	-56.6101	-53.7415	-55.8777	-67.5659	-69.397
80.6	-91.5527										80.5	-58.96	-56.9153	-53.3752	-56.2439	-67.4133	-69.3359
80.65	-90.7593										80.55	-58.6243	-56.7322	-53.8025	-56.0913	-67.1081	-69.5801
80.7	-89.8437										80.6	-58.8074	-56.5796	-53.6194	-56.0608	-67.4744	-69.458
80.75	-88.9282										80.65	-58.8989	-56.5796	-53.3447	-56.1218	-67.4133	-69.2444
80.8	-87.9211										80.7	-58.7769	-56.7627	-53.7415	-55.7861	-67.3523	-69.2444
80.85	-86.853										80.75	-58.5632	-56.6101	-53.5278	-56.1218	-67.0776	-69.4275
80.9	-85.4797										80.8	-58.8989	-56.5186	-53.4668	-56.0608	-67.4438	-69.3359
80.95	-84.137										80.85	-58.6548	-56.3965	-53.5889	-55.8472	-67.3523	-69.0613
81	-82.8857										80.9	-58.6243	-56.5796	-53.2227	-56.1523	-67.2302	-69.2139
81.05	-81.665										80.95	-58.7158	-56.488	-53.5889	-55.8777	-67.1387	-69.397
81.1	-80.5664										81	-58.6243	-56.3965	-53.3752	-55.8777	-67.2302	-69.1223
81.15	-79.3762										81.05	-58.7158	-56.3049	-53.3752	-55.9998	-67.1692	-69.0308
81.2	-78.0334										81.1	-58.6853	-56.5186	-53.4973	-55.6946	-67.0166	-68.9697
81.25	-76.7212										81.15	-58.2581	-56.366	-53.2227	-55.9387	-67.0471	-69.2139
81.3	-75.2563										81.2	-58.6548	-56.3354	-53.3447	-55.8777	-67.2302	-69.1223
81.35	-73.9136										81.25	-58.5327	-56.2744	-52.948	-55.4504	-67.0166	-68.7561
81.4	-72.7234										81.3	-58.5632	-56.366	-53.3752	-55.8777	-66.864	-68.634
81.45	-71.3501										81.35	-58.5632	-56.3049	-53.1006	-55.8472	-66.8335	-68.9392
81.5	-70.0378										81.4	-58.197	-56.2744	-53.2837	-55.4504	-67.0166	-68.7866
81.55	-68.7256										81.45	-58.5327	-55.9387	-53.1616	-55.7861	-67.0471	-68.6951
81.6	-67.4438										81.5	-58.3496	-56.2439	-52.9785	-55.7556	-66.7114	-68.3899
81.65	-66.4062										81.55	-58.4717	-56.2744	-53.1921	-55.481	-66.8335	-68.7866
81.7	-65.3992										81.6	-58.5022	-56.1829	-52.887	-55.7556	-66.9861	-68.6951
81.75	-64.4836										81.65	-58.3191	-56.0913	-53.1311	-55.6641	-66.864	-68.6645
81.8	-63.446										81.7	-58.5327	-55.9692	-52.887	-55.5725	-66.7419	-68.3594
81.85	-62.4695										81.75	-58.197	-56.1829	-53.1006	-55.8166	-66.6809	-68.573
81.9	-61.4319										81.8	-58.4717	-56.1523	-53.0395	-55.603	-66.8945	-68.6645
81.95	-60.3332										81.85	-58.5327	-56.1829	-52.7039	-55.6335	-66.803	-68.5425
82	-59.4177										81.9	-58.2275	-55.8777	-52.8564	-55.6946	-66.5588	-68.4509
82.05	-58.5632										81.95	-58.4412	-55.9692	-52.6733	-55.542	-66.3757	-68.2068
82.1	-57.6172										82	-58.2886	-56.1523	-52.7344	-55.6335	-66.7114	-68.4814
82.15	-56.7017										82.05	-58.2275	-56.0608	-52.7039	-55.6335	-66.6504	-68.512
82.2	-55.7556										82.1	-58.3496	-56.0303	-52.4292	-55.4199	-66.5893	-68.2678
82.25	-54.8401										82.15	-58.1055	-55.6946	-52.7039	-55.603	-66.2231	-68.2068
82.3	-53.9856										82.2	-58.2275	-55.8472	-52.5513	-55.542	-66.4673	-68.1457
82.35	-53.4363										82.25	-58.2581	-55.9998	-52.3682	-55.3894	-66.5893	-68.3594
82.4	-52.8259										82.3	-57.9224	-55.9082	-52.5207	-55.4504	-66.4673	-68.3594
82.45	-51.9409										82.35	-58.197	-55.7861	-52.3682	-55.5725	-66.2842	-68.2678
82.5	-51.178										82.4	-58.136	-55.5115	-52.4292	-55.3894	-66.2231	-67.9932
82.55	-50.3845										82.45	-57.8003	-55.6641	-52.4292	-55.3894	-66.4062	-68.0237
82.6	-49.3469										82.5	-58.2581	-55.8166	-52.124	-55.542	-66.3757	-68.2373
82.65	-48.3704										82.55	-58.136	-55.7556	-52.3987	-55.3894	-66.2842	-68.1457
82.7	-47.6379										82.6	-57.8613	-55.6641	-52.3987	-55.3589	-66.0705	-68.1763
82.75	-46.5393										82.65	-58.1055	-55.3894	-52.0935	-55.481	-66.2537	-68.0542
82.8	-45.0745										82.7	-58.197	-55.603	-52.3071	-55.3589	-66.2537	-67.8101
82.85	-43.1519										82.75	-57.8918	-55.7251	-52.3682	-55.2673	-66.1926	-67.9932
82.9	-41.3208										82.8	-58.0444	-55.603	-52.0019	-55.603	-66.1316	-68.0847
82.95	-38.0554										82.85	-57.9834	-55.542	-52.3071	-55.4199	-65.8569	-67.9321
83	-33.1116										82.9	-57.9529	-55.5115	-52.3071	-55.0842	-66.04	-67.749
83.05	-26.0315										82.95	-57.9224	-55.3894	-51.8494	-55.4199	-66.0705	-67.5964
83.1	-17.3645										83	-58.1055	-55.542	-52.2766	-55.3894	-65.979	-67.7795
83.15	-6.86646										83.05	-57.8613	-55.542	-52.1851	-55.1453	-66.0095	-67.8711
83.2	4.57764										83.1	-57.7087	-55.481	-51.8494	-55.3894	-65.6433	-67.7185
83.25	14.9536										83.15	-57.9834	-55.3589	-52.2156	-55.3894	-65.918	-67.7185
83.3	24.7498										83.2	-57.8613	-55.2063	-52.063	-55.2673	-66.04	-67.4438
83.35	32.7454										83.25	-57.6477	-55.2978	-51.8799	-55.2673	-65.918	-67.5354
83.4	37.6282										83.3	-57.8308	-55.4504	-52.0325	-55.3894	-65.7959	-67.749
83.45	40.3442										83.35	-57.8918	-55.481	-52.0935	-55.2978	-65.5212	-67.688
83.5	40.1916										83.4	-57.5561	-55.3284	-51.7883	-55.0537	-65.6433	-67.5964
83.55	36.5601										83.45	-57.6477	-55.2673	-52.0325	-55.481	-65.8569	-67.4744
83.6	30.9448										83.5	-57.7698	-55.0537	-51.9714	-55.2673	-65.7654	-67.4133
83.65	23.5291										83.55	-57.6782	-55.2368	-51.6357	-55.0232	-65.6433	-67.5964
83.7	14.0381										83.6	-57.4951	-55.3589	-51.9104	-55.2978	-65.4602	-67.4744
83.75	4.02832										83.65	-57.6782	-55.2673	-51.8799	-55.2368	-65.3992	-67.3218
83.8	-6.2561										83.7	-57.5561	-55.2368	-51.6663	-55.1453	-65.6433	-67.1997
83.85	-17.2424										83.75	-57.2815	-55.1453	-51.7883	-54.9011	-65.6433	-67.5049
83.9	-27.4048										83.8	-57.4341	-54.9316	-51.8188	-55.2673	-65.4602	-67.2913
83.95	-36.8957										83.85	-57.4646	-54.9927	-51.6052	-55.2063	-65.4297	-66.8945
84	-46.4477										83.9	-57.3425	-55.0537	-51.6052	-54.9316	-65.2466	-67.3523
84.05	-54.657										83.95	-57.0373	-55.1758	-51.7273	-55.1147	-65.3686	-67.1387
84.1	-61.7676										84	-57.373	-55.0842	-51.6357	-55.1453	-65.5212	-66.9556
84.15	-68.4509										84.05	-57.312	-54.9927	-51.3611	-55.0537	-65.3992	-67.1997
84.2	-74.2187										84.1	-57.0679	-54.779	-51.7273	-54.8706	-65.4602	-67.1692
84.25	-78.8574										84.15	-57.2205	-54.657	-51.6357	-55.1147	-65.3076	-66.9861
84.3	-82.5195										84.2	-57.3425	-54.779	-51.3306	-54.9622	-65.1245	-67.0776
84.35	-85.9985										84.25	-57.2205	-54.9316	-51.5747	-54.9927	-65.2161	-66.7114
84.4	-88.4399										84.3	-56.8542	-54.9622	-51.6052	-54.9011	-65.4297	-67.0471
84.45	-90.21										84.35	-57.1899	-54.8401	-51.4526	-55.0232	-65.3992	-66.9556
84.5	-91.3086										84.4	-57.1289	-54.779	-51.3306	-54.9927	-65.2466	-66.925
84.55	-92.5598										84.45	-57.0373	-54.5959	-51.4221	-54.657	-65.2161	-66.925
84.6	-92.9871										84.5	-56.7627	-54.779	-51.3916	-54.8401	-65.0635	-66.7114
84.65	-93.1702										84.55	-57.0373	-54.8096	-51.1475	-54.9011	-64.9414	-66.803
84.7	-92.7734										84.6	-56.9763	-54.718	-51.4221	-54.6875	-65.2466	-66.5893
84.75	-92.5293										84.65	-56.8237	-54.4434	-51.2695	-54.4434	-65.094	-66.803
84.8	-92.102										84.7	-56.7322	-54.8401	-51.0559	-54.6265	-64.9719	-66.5283
84.85	-91.3086										84.75	-56.9153	-54.6265	-51.1169	-54.718	-64.7278	-66.803
84.9	-90.3015										84.8	-56.9153	-54.3213	-51.2695	-54.5959	-65.033	-66.5893
84.95	-89.3249										84.85	-56.6711	-54.6265	-51.2085	-54.1992	-65.094	-66.5283
85	-88.4705										84.9	-56.6406	-54.5959	-50.8118	-54.5959	-64.8804	-66.6199
85.05	-87.2803										84.95	-56.9153	-54.2603	-51.2085	-54.4739	-64.8804	-66.3757
85.1	-86.1511										85	-56.7932	-54.6265	-51.178	-54.3823	-65.0024	-66.7114
85.15	-84.6558										85.05	-56.7017	-54.5044	-50.9644	-54.2603	-64.8804	-66.4368
85.2	-83.4351										85.1	-56.6711	-54.3518	-50.8728	-54.4739	-64.7888	-66.6199
85.25	-82.3975										85.15	-56.7627	-54.4739	-51.1169	-54.5654	-64.9109	-66.5588
85.3	-81.0852										85.2	-56.6406	-54.2603	-51.1169	-54.3823	-64.7583	-66.4062
85.35	-79.834										85.25	-56.5796	-54.5654	-50.8118	-54.1382	-64.7888	-66.4978
85.4	-78.186										85.3	-56.5186	-54.4434	-50.7812	-54.2908	-64.7888	-66.3147
85.45	-76.9958										85.35	-56.6711	-54.2603	-50.9338	-54.4739	-64.4531	-66.4978
85.5	-75.9277										85.4	-56.5491	-54.3518	-50.9644	-54.3823	-64.8193	-66.4368
85.55	-74.585										85.45	-56.427	-54.1077	-50.6897	-54.1687	-64.6057	-66.1316
85.6	-73.3032										85.5	-56.2744	-54.4434	-50.8118	-53.9856	-64.6057	-66.4062
85.65	-71.7163										85.55	-56.5186	-54.2297	-50.9033	-54.3823	-64.6362	-66.1926
85.7	-70.6482										85.6	-56.3965	-54.2908	-50.7812	-54.2603	-64.3921	-66.1621
85.75	-69.6716										85.65	-56.3354	-54.2603	-50.5371	-54.2297	-64.6667	-66.2537
85.8	-68.4204										85.7	-56.0913	-53.9551	-50.7507	-54.0161	-64.3005	-66.0705
85.85	-67.1692										85.75	-56.2134	-54.2908	-50.7507	-54.3518	-64.6667	-66.1316
85.9	-65.8264										85.8	-56.2744	-54.0771	-50.6592	-54.2908	-64.5447	-66.2231
85.95	-64.8804										85.85	-56.1523	-54.1687	-50.3845	-54.2603	-64.3616	-65.918
86	-63.9038										85.9	-56.1218	-54.1992	-50.6287	-54.0771	-64.4836	-66.1621
86.05	-62.7136										85.95	-55.9998	-53.894	-50.5981	-54.0771	-64.2395	-66.1316
86.1	-61.615										86	-56.1523	-54.1992	-50.5371	-54.3823	-64.5752	-65.8264
86.15	-60.5774										86.05	-56.1218	-53.9551	-50.2014	-54.1992	-64.4226	-66.1316
86.2	-59.4788										86.1	-56.0913	-53.9551	-50.4761	-54.1992	-64.3616	-66.0095
86.25	-58.7463										86.15	-55.8777	-54.1382	-50.415	-53.9246	-64.4226	-65.7349
86.3	-57.7087										86.2	-55.9082	-53.8025	-50.3235	-54.0161	-64.0564	-66.0095
86.35	-56.7932										86.25	-55.9998	-53.9551	-50.0183	-54.1992	-64.4531	-65.8569
86.4	-55.7861										86.3	-56.0303	-53.9551	-50.1709	-54.0466	-64.27	-65.6738
86.45	-54.8096										86.35	-55.8777	-53.6499	-50.3235	-54.0161	-64.0869	-65.8569
86.5	-54.1382										86.4	-55.5725	-53.9246	-50.2014	-53.772	-64.1785	-65.6738
86.55	-53.3142										86.45	-55.8472	-53.772	-49.9878	-53.9551	-63.9343	-65.5212
86.6	-52.5207										86.5	-55.8777	-53.5583	-49.9573	-54.0771	-64.2395	-65.8264
86.65	-51.5747										86.55	-55.8472	-53.8025	-50.1404	-53.9551	-64.1479	-65.6433
86.7	-50.5371										86.6	-55.6946	-53.7415	-49.9878	-53.833	-63.8428	-65.4602
86.75	-49.7742										86.65	-55.5725	-53.3752	-49.9268	-53.7109	-64.1785	-65.8264
86.8	-49.1333										86.7	-55.7861	-53.5889	-49.6521	-53.9551	-64.1174	-65.6128
86.85	-48.0347										86.75	-55.9387	-53.6499	-49.8047	-53.8635	-63.7512	-65.3992
86.9	-46.8445										86.8	-55.8166	-53.3142	-49.8352	-53.772	-64.1785	-65.7043
86.95	-45.3491										86.85	-55.6946	-53.4973	-49.7131	-53.8025	-64.0259	-65.6128
87	-43.4875										86.9	-55.4199	-53.4058	-49.469	-53.833	-63.8123	-65.3381
87.05	-41.5649										86.95	-55.6335	-53.2532	-49.3164	-53.8025	-64.0259	-65.5518
87.1	-38.4521										87	-55.7861	-53.4058	-49.4385	-53.5889	-63.9038	-65.5212
87.15	-33.5388										87.05	-55.6335	-53.2837	-49.2859	-53.7415	-63.6902	-65.2466
87.2	-26.5503										87.1	-55.542	-53.1921	-49.2554	-53.6499	-63.9648	-65.5823
87.25	-17.5171										87.15	-55.3284	-53.1006	-48.9502	-53.5583	-63.9038	-65.4907
87.3	-6.86646										87.2	-55.2673	-53.2532	-48.9502	-53.6194	-63.5681	-65.1855
87.35	4.08936										87.25	-55.5725	-53.1311	-49.1028	-53.3447	-63.8428	-65.4297
87.4	15.0757										87.3	-55.5725	-52.8259	-49.0112	-53.6194	-63.8733	-65.2771
87.45	24.7803										87.35	-55.3894	-53.0701	-48.9502	-53.4058	-63.4766	-65.033
87.5	32.7148										87.4	-55.2978	-53.0395	-48.5535	-53.5278	-63.8733	-65.2771
87.55	38.2996										87.45	-55.1147	-52.7039	-48.7061	-53.5278	-63.7817	-65.155
87.6	40.9851										87.5	-55.2368	-52.9175	-48.9807	-53.4058	-63.5376	-65.155
87.65	40.3748										87.55	-55.4504	-52.7954	-48.8281	-53.4058	-63.8428	-65.0635
87.7	37.0483										87.6	-55.4504	-52.7039	-48.584	-53.2227	-63.7207	-65.2466
87.75	31.4941										87.65	-55.3589	-52.7039	-48.3704	-53.4973	-63.385	-65.1245
87.8	23.9868										87.7	-55.0842	-52.7649	-48.4619	-53.1616	-63.6597	-64.9719
87.85	14.9231										87.75	-54.9011	-52.6123	-48.5535	-53.4058	-63.6597	-65.2771
87.9	5.09643										87.8	-55.1147	-52.4597	-48.3398	-53.009	-63.4766	-65.1245
87.95	-5.21851										87.85	-55.2368	-52.6428	-48.2483	-53.4363	-63.3545	-64.8498
88	-15.8081										87.9	-55.1453	-52.5207	-48.0041	-53.1006	-63.5071	-65.094
88.05	-26.062										87.95	-55.0842	-52.2461	-47.9126	-53.3752	-63.446	-65.155
88.1	-35.8582										88	-55.0232	-52.3682	-48.0957	-53.0701	-63.2324	-64.9414
88.15	-44.7693										88.05	-54.8096	-52.4597	-48.0347	-53.2532	-63.5681	-64.7278
88.2	-52.9175										88.1	-54.7485	-52.3682	-47.9126	-53.1311	-63.4766	-65.033
88.25	-60.3027										88.15	-54.9316	-52.0325	-47.821	-53.1006	-63.2324	-64.9414
88.3	-66.7725										88.2	-54.9927	-52.2766	-47.6074	-53.1006	-63.3545	-64.6667
88.35	-72.5098										88.25	-54.9316	-52.3071	-47.6379	-52.8259	-63.3545	-64.8193
88.4	-77.3926										88.3	-54.9622	-52.0935	-47.76	-53.1006	-63.2324	-64.8193
88.45	-81.5124										88.35	-54.7485	-52.063	-47.6074	-52.7039	-63.324	-64.7888
88.5	-84.8389										88.4	-54.5349	-52.2156	-47.5769	-53.009	-63.385	-64.5752
88.55	-87.3108										88.45	-54.5654	-52.2156	-47.3022	-52.8259	-63.2019	-64.8804
88.6	-89.1724										88.5	-54.8096	-51.8494	-47.2107	-52.948	-62.9272	-64.8193
88.65	-90.7288										88.55	-54.779	-52.0935	-47.3938	-52.9175	-63.2629	-64.6667
88.7	-91.6138										88.6	-54.718	-52.0935	-47.1497	-52.5207	-63.2019	-64.7278
88.75	-92.102										88.65	-54.6875	-52.0019	-46.936	-52.9175	-63.0188	-64.8193
88.8	-92.1631										88.7	-54.5044	-51.8188	-46.7224	-52.6428	-62.8662	-64.6362
88.85	-92.1631										88.75	-54.4739	-52.063	-46.8445	-52.7954	-63.1103	-64.4226
88.9	-91.9495										88.8	-54.657	-51.9409	-46.6309	-52.7649	-63.0188	-64.6057
88.95	-91.5527										88.85	-54.5654	-51.8188	-46.2646	-52.3987	-62.6831	-64.6667
89	-90.9424										88.9	-54.3213	-51.6968	-46.5088	-52.7039	-63.0493	-64.5447
89.05	-90.1489										88.95	-54.3213	-51.9714	-46.1426	-52.5513	-63.0188	-64.2395
89.1	-89.1113										89	-54.4739	-51.8799	-46.0205	-52.5818	-62.8967	-64.5752
89.15	-88.0432										89.05	-54.2603	-51.6663	-46.0815	-52.7039	-62.7136	-64.4836
89.2	-86.9751										89.1	-54.1687	-51.6357	-45.6848	-52.3071	-62.9272	-64.4226
89.25	-85.8154										89.15	-54.3518	-51.7883	-45.6848	-52.7039	-62.8967	-64.1479
89.3	-84.5032										89.2	-54.3213	-51.7578	-45.5017	-52.6428	-62.8052	-64.5447
89.35	-83.2214										89.25	-54.0771	-51.5747	-45.105	-52.2766	-62.7441	-64.3921
89.4	-82.0007										89.3	-54.4434	-51.5137	-44.9829	-52.6123	-62.8357	-64.331
89.45	-80.5054										89.35	-54.2603	-51.7883	-44.5251	-52.4292	-62.7441	-64.0869
89.5	-79.071										89.4	-54.1992	-51.6357	-44.5862	-52.4292	-62.5915	-64.4836
89.55	-77.7893										89.45	-54.2297	-51.4221	-44.1589	-52.4292	-62.7136	-64.3921
89.6	-76.5381										89.5	-53.833	-51.3	-43.8538	-51.9714	-62.7747	-64.1785
89.65	-75.3174										89.55	-54.3213	-51.6663	-43.5791	-52.3682	-62.6526	-63.9954
89.7	-73.9746										89.6	-54.1077	-51.4832	-42.9993	-52.2461	-62.4084	-64.27
89.75	-72.7234										89.65	-54.0466	-51.3	-42.8467	-51.8799	-62.561	-64.209
89.8	-71.5027										89.7	-53.9856	-51.0864	-41.9922	-52.2461	-62.6221	-64.1479
89.85	-70.1904										89.75	-53.6499	-51.3916	-41.7786	-52.124	-62.5305	-63.8428
89.9	-68.8476										89.8	-54.0161	-51.3306	-40.9546	-52.0325	-62.1948	-64.0869
89.95	-67.5659										89.85	-53.833	-51.178	-40.4663	-52.2461	-62.5	-64.1174
90	-66.4062										89.9	-53.9246	-50.8728	-39.3982	-51.9714	-62.5305	-64.0869
90.05	-65.1855										89.95	-54.0161	-51.1475	-38.0554	-52.0019	-62.439	-63.7207
90.1	-63.9343										90	-53.7109	-51.239	-36.6516	-52.0935	-62.1948	-63.9648
90.15	-62.8357										90.05	-53.9246	-51.0559	-34.1492	-51.9714	-62.3779	-64.1785
90.2	-61.7065										90.1	-53.7109	-50.8728	-31.5247	-51.9714	-62.5	-64.1174
90.25	-60.6079										90.15	-53.9246	-50.8118	-26.7334	-52.063	-62.3169	-63.7817
90.3	-59.5398										90.2	-53.9246	-51.1169	-20.4773	-51.8494	-62.1338	-63.7512
90.35	-58.4106										90.25	-53.4973	-50.8728	-12.7869	-52.0019	-62.1033	-64.0259
90.4	-57.4341										90.3	-53.8025	-50.8728	-3.35693	-51.9409	-62.3169	-64.0259
90.45	-56.6101										90.35	-53.6804	-50.6897	5.95093	-51.6052	-62.1948	-63.9038
90.5	-55.6641										90.4	-53.6804	-50.7202	15.7776	-51.9714	-62.1033	-63.5986
90.55	-54.9011										90.45	-53.6804	-50.8118	24.9939	-51.8494	-61.8591	-63.7817
90.6	-54.0771										90.5	-53.5278	-50.7202	32.5623	-51.6052	-62.1643	-63.9343
90.65	-53.2837										90.55	-53.5889	-50.6287	39.1235	-51.8494	-62.1338	-63.8428
90.7	-52.3987										90.6	-53.5278	-50.3235	43.9453	-51.8188	-61.9507	-63.6902
90.75	-51.4832										90.65	-53.2837	-50.5371	47.0886	-51.6052	-61.7676	-63.446
90.8	-50.5981										90.7	-53.4058	-50.5371	48.9502	-51.8799	-61.9812	-63.7207
90.85	-49.7436										90.75	-53.4058	-50.4456	49.53	-51.7273	-62.0728	-63.7817
90.9	-48.7366										90.8	-53.2227	-50.3235	48.9807	-51.3916	-61.9507	-63.7817
90.95	-47.6685										90.85	-53.3447	-50.0488	47.8516	-51.8188	-61.7981	-63.5376
91	-46.6919										90.9	-53.3752	-50.2014	45.7764	-51.8188	-61.7065	-63.5071
91.05	-45.3186										90.95	-53.0395	-50.3235	43.2129	-51.4526	-61.9812	-63.7207
91.1	-43.9148										91	-53.2532	-50.2319	40.5273	-51.6663	-61.7981	-63.6902
91.15	-41.6565										91.05	-53.2532	-50.0488	37.2009	-51.6357	-61.7981	-63.6902
91.2	-38.7268										91.1	-52.9785	-49.8047	33.6609	-51.4221	-61.554	-63.5986
91.25	-34.4849										91.15	-53.1006	-49.8657	30.0903	-51.5442	-61.4929	-63.324
91.3	-28.1982										91.2	-53.1006	-50.0183	26.2756	-51.5747	-61.7371	-63.5376
91.35	-19.6533										91.25	-53.009	-49.8962	22.2168	-51.3611	-61.5234	-63.5986
91.4	-9.64355										91.3	-52.9785	-49.7436	18.3105	-51.3916	-61.5234	-63.4766
91.45	1.12915										91.35	-53.009	-49.53	14.4348	-51.4526	-61.3098	-63.4155
91.5	12.2681										91.4	-52.887	-49.408	10.2539	-51.4526	-61.2793	-63.2019
91.55	22.2778										91.45	-52.6733	-49.5911	6.37817	-51.178	-61.5234	-63.4155
91.6	30.304										91.5	-53.009	-49.5605	2.99072	-51.5442	-61.3708	-63.4766
91.65	36.438										91.55	-52.887	-49.408	-1.00708	-51.4221	-61.4929	-63.5071
91.7	39.917										91.6	-52.4597	-49.2248	-4.45557	-51.0864	-61.2183	-63.385
91.75	39.7949										91.65	-52.887	-49.1028	-7.53784	-51.4832	-61.1877	-63.2324
91.8	37.384										91.7	-52.7954	-49.1028	-11.0474	-51.4526	-61.3098	-63.1103
91.85	32.7148										91.75	-52.4902	-49.2248	-14.0686	-51.2695	-61.3708	-63.4155
91.9	25.2991										91.8	-52.5513	-49.1028	-16.7236	-51.3916	-61.3403	-63.324
91.95	16.6931										91.85	-52.7649	-49.0723	-19.7144	-51.3916	-61.0962	-63.2324
92	7.38525										91.9	-52.6123	-48.7976	-22.4915	-51.3306	-60.9741	-63.0493
92.05	-3.14331										91.95	-52.2766	-48.5535	-24.9634	-51.1475	-61.0962	-63.1409
92.1	-13.3667										92	-52.6123	-48.645	-27.4658	-51.3916	-61.2488	-63.324
92.15	-23.1934										92.05	-52.4902	-48.7061	-30.2429	-51.2695	-61.0962	-63.1714
92.2	-33.3252										92.1	-52.1545	-48.7061	-32.6233	-51.0254	-60.9741	-62.8052
92.25	-42.3889										92.15	-52.3682	-48.4924	-34.5764	-51.2695	-60.7605	-63.1409
92.3	-50.5981										92.2	-52.2766	-48.2178	-37.2925	-51.2695	-60.73	-63.0493
92.35	-58.2581										92.25	-52.0935	-48.1262	-39.6423	-51.1475	-60.9436	-62.8662
92.4	-65.155										92.3	-51.8799	-47.9431	-41.5955	-51.0254	-60.9436	-63.0493
92.45	-70.9839										92.35	-52.2156	-48.1873	-43.7622	-51.4221	-60.852	-62.9272
92.5	-75.7141										92.4	-52.063	-48.1567	-45.9595	-51.2695	-60.8826	-62.7747
92.55	-80.1392										92.45	-51.8188	-47.9126	-47.8516	-50.8728	-60.73	-63.0188
92.6	-83.6487										92.5	-51.9409	-47.8516	-49.469	-51.178	-60.5164	-62.9272
92.65	-86.3037										92.55	-51.9104	-47.6074	-51.4832	-51.239	-60.852	-62.8357
92.7	-88.1958										92.6	-51.8494	-47.3328	-53.009	-51.1475	-60.852	-62.9272
92.75	-89.9658										92.65	-51.5137	-47.4243	-54.3823	-50.8423	-60.791	-62.6526
92.8	-91.156										92.7	-51.9714	-47.5769	-55.8472	-51.1475	-60.6384	-62.8967
92.85	-91.8274										92.75	-51.8188	-47.3328	-57.251	-51.0864	-60.4248	-62.6526
92.9	-91.98										92.8	-51.6052	-47.0581	-58.3496	-50.9644	-60.4248	-62.8967
92.95	-91.8884										92.85	-51.5442	-46.7529	-59.1125	-50.8118	-60.6079	-62.7441
93	-91.9495										92.9	-51.7883	-46.8445	-60.4858	-51.0864	-60.6079	-62.7136
93.05	-91.4001										92.95	-51.6968	-46.875	-61.3098	-50.9949	-60.4858	-62.7441
93.1	-90.7593										93	-51.3916	-46.5698	-62.1033	-50.7507	-60.3332	-62.4695
93.15	-89.7522										93.05	-51.3306	-46.1121	-62.6526	-50.8728	-60.2112	-62.7136
93.2	-88.9282										93.1	-51.5442	-46.2952	-63.7512	-51.0254	-60.5164	-62.3779
93.25	-88.1348										93.15	-51.4221	-46.051	-64.209	-50.8728	-60.3638	-62.7441
93.3	-86.9446										93.2	-51.178	-45.5933	-64.6667	-50.7202	-60.2417	-62.4084
93.35	-85.8154										93.25	-51.1475	-45.7764	-65.2161	-50.7812	-60.2722	-62.6831
93.4	-84.4116										93.3	-51.2085	-45.2881	-65.918	-50.8728	-60.4248	-62.561
93.45	-83.3435										93.35	-51.178	-45.0134	-66.3452	-50.7812	-60.1501	-62.3779
93.5	-82.3364										93.4	-50.9338	-44.9829	-66.5588	-50.4761	-60.1196	-62.5305
93.55	-80.8716										93.45	-50.9644	-44.4031	-67.0166	-50.7202	-60.3638	-62.3169
93.6	-79.6204										93.5	-51.0559	-44.22	-67.5049	-50.7812	-60.1807	-62.7136
93.65	-78.1555										93.55	-50.9644	-44.0063	-67.7185	-50.6287	-60.1196	-62.5
93.7	-77.0874										93.6	-50.7507	-43.396	-67.9016	-50.4456	-60.1501	-62.3169
93.75	-76.0193										93.65	-50.6592	-43.0603	-68.0847	-50.5676	-59.906	-62.4695
93.8	-74.646										93.7	-50.7507	-42.2668	-68.6035	-50.6897	-60.2112	-62.1643
93.85	-73.3642										93.75	-50.6592	-41.9922	-68.7561	-50.5371	-60.0891	-62.439
93.9	-71.991										93.8	-50.4761	-41.1072	-68.7256	-50.354	-60.0281	-62.3474
93.95	-70.7092										93.85	-50.293	-40.0696	-68.8476	-50.354	-60.0281	-61.9507
94	-69.9158										93.9	-50.4761	-39.032	-69.3664	-50.5676	-59.7839	-62.2864
94.05	-68.634										93.95	-50.3235	-37.1704	-69.458	-50.3845	-60.1196	-62.1338
94.1	-67.5659										94	-50.2014	-35.3088	-69.6411	-50.293	-59.8144	-62.1033
94.15	-66.3757										94.05	-49.9268	-31.9214	-69.4885	-50.1404	-60.0586	-62.1338
94.2	-65.0635										94.1	-50.2014	-27.0996	-70.1294	-50.3235	-60.0586	-62.0422
94.25	-64.4226										94.15	-50.0183	-20.5994	-70.1294	-50.415	-59.906	-62.0117
94.3	-63.446										94.2	-50.1099	-11.9629	-70.2515	-50.2624	-59.906	-62.1338
94.35	-62.439										94.25	-49.6521	-2.56348	-70.1599	-50.0488	-59.6313	-61.8286
94.4	-61.4624										94.3	-49.6521	7.8125	-70.3735	-50.2014	-59.967	-62.1643
94.45	-60.2417										94.35	-49.8657	18.28	-70.6787	-50.2624	-59.845	-62.1643
94.5	-59.5398										94.4	-49.6826	27.3132	-70.6177	-50.1709	-59.8144	-61.7371
94.55	-58.8989										94.45	-49.53	35.614	-70.4956	-50.1099	-59.7839	-62.0422
94.6	-57.9834										94.5	-49.1943	42.2363	-70.5566	-49.8352	-59.5398	-62.1033
94.65	-57.0984										94.55	-49.3469	46.814	-70.8618	-50.0793	-59.7839	-61.7371
94.7	-56.2439										94.6	-49.3164	50.1099	-70.8923	-50.0793	-59.6313	-62.1033
94.75	-55.2368										94.65	-49.2554	51.5747	-70.8923	-50.0793	-59.6008	-61.8896
94.8	-54.657										94.7	-48.9807	51.8494	-70.7092	-49.9878	-59.6619	-61.5845
94.85	-54.0771										94.75	-48.8281	51.1475	-70.8618	-49.7436	-59.3872	-61.8896
94.9	-53.1921										94.8	-49.0112	49.3469	-71.1365	-50.0793	-59.6619	-61.8591
94.95	-52.3987										94.85	-48.8586	46.814	-71.1059	-50.0183	-59.5703	-61.4929
95	-51.5442										94.9	-48.7976	43.9148	-71.1059	-50.0793	-59.3262	-61.7676
95.05	-50.8118										94.95	-48.4924	40.5884	-70.9228	-49.8352	-59.6924	-61.7676
95.1	-50.1709										95	-48.4009	36.6821	-71.1365	-49.9268	-59.4177	-61.4319
95.15	-49.408										95.05	-48.5535	32.7148	-71.3196	-50.0488	-59.2957	-61.8591
95.2	-48.5535										95.1	-48.4924	28.6865	-71.2585	-50.0488	-59.5398	-61.7065
95.25	-47.6379										95.15	-48.3093	24.0173	-71.2891	-49.7131	-59.4177	-61.4014
95.3	-46.3867										95.2	-48.0041	19.7144	-71.0449	-49.9878	-59.3872	-61.7981
95.35	-45.2881										95.25	-47.7295	15.5029	-71.228	-49.9268	-59.3262	-61.615
95.4	-44.1894										95.3	-48.0041	10.8948	-71.4722	-49.6216	-59.1431	-61.3708
95.45	-42.6941										95.35	-47.76	6.74438	-71.3806	-49.8962	-59.2651	-61.7676
95.5	-40.3748										95.4	-47.5159	2.62451	-71.4416	-49.8657	-59.2651	-61.676
95.55	-37.1094										95.45	-47.2412	-1.28174	-71.228	-49.4995	-59.1431	-61.2793
95.6	-31.9824										95.5	-46.8445	-5.27954	-71.3501	-49.8352	-59.1736	-61.4624
95.65	-25.0854										95.55	-46.8445	-8.81958	-71.5332	-49.6826	-59.2346	-61.4929
95.7	-16.2964										95.6	-46.6919	-12.0239	-71.5332	-49.4995	-59.1125	-61.3708
95.75	-5.95093										95.65	-46.4172	-15.625	-71.5637	-49.7436	-59.082	-61.3403
95.8	4.97436										95.7	-46.2341	-18.7073	-71.3501	-49.2859	-59.2041	-61.4319
95.85	15.625										95.75	-45.8069	-21.637	-71.2891	-49.7131	-58.9905	-61.2793
95.9	25.116										95.8	-45.4712	-24.5972	-71.5637	-49.3774	-58.9905	-61.2488
95.95	32.8674										95.85	-45.3491	-27.5574	-71.6247	-49.6216	-59.1736	-61.4929
96	37.9333										95.9	-45.1355	-30.3955	-71.5942	-49.469	-59.021	-61.2793
96.05	39.978										95.95	-44.7082	-32.6843	-71.4416	-49.5605	-58.8684	-61.0657
96.1	39.1846										96	-44.22	-35.614	-71.4111	-49.53	-59.082	-61.4319
96.15	35.8887										96.05	-43.6707	-38.0554	-71.6247	-49.3164	-59.021	-61.3403
96.2	30.2124										96.1	-43.2434	-40.3748	-71.7773	-49.3774	-58.6853	-61.0046
96.25	22.6135										96.15	-42.9993	-42.6941	-71.8079	-49.1638	-59.021	-61.1572
96.3	13.7329										96.2	-42.3279	-45.105	-71.8384	-49.3469	-58.9905	-61.2793
96.35	3.87573										96.25	-41.5344	-47.0581	-71.7468	-48.9502	-58.6243	-61.0657
96.4	-6.43921										96.3	-40.741	-48.9197	-71.5027	-49.1638	-58.8989	-60.9741
96.45	-17.0288										96.35	-39.4897	-50.9644	-71.5942	-48.8281	-58.7769	-61.1877
96.5	-27.0386										96.4	-37.9944	-52.8564	-71.8079	-49.1638	-58.6548	-61.1267
96.55	-36.4685										96.45	-36.1328	-54.3213	-71.8689	-48.9197	-58.7463	-60.8215
96.6	-45.3491										96.5	-33.2336	-55.6335	-71.8079	-49.2248	-58.8379	-60.9741
96.65	-53.3142										96.55	-28.5645	-57.312	-71.6247	-48.9807	-58.7158	-61.0352
96.7	-60.6079										96.6	-22.0032	-58.7158	-71.4722	-49.1943	-58.5632	-60.9131
96.75	-66.864										96.65	-13.4583	-59.7534	-71.7468	-49.1333	-58.8379	-60.852
96.8	-72.6929										96.7	-3.17383	-60.5164	-71.8994	-48.7976	-58.8684	-61.0657
96.85	-77.4231										96.75	7.56836	-61.9507	-71.8079	-49.0112	-58.4106	-61.0046
96.9	-81.4514										96.8	18.219	-62.7441	-71.8384	-48.7061	-58.6243	-60.8215
96.95	-84.7473										96.85	28.1372	-63.5071	-71.7468	-49.0723	-58.6853	-60.9131
97	-87.1582										96.9	36.7737	-63.9038	-71.7163	-48.7976	-58.5327	-61.0657
97.05	-89.1113										96.95	43.7012	-64.8498	-71.8079	-48.7061	-58.4412	-60.9436
97.1	-90.4846										97	48.8586	-65.4907	-71.7773	-48.8892	-58.6548	-60.6384
97.15	-91.4917										97.05	52.3376	-65.7654	-71.6858	-48.4924	-58.5022	-60.8826
97.2	-91.98										97.1	53.7415	-65.9485	-71.5942	-48.7976	-58.197	-60.852
97.25	-91.98										97.15	53.6194	-66.6809	-71.8079	-48.5535	-58.5632	-60.8215
97.3	-91.8884										97.2	52.6733	-67.1387	-71.6553	-48.5229	-58.4412	-60.5774
97.35	-91.6138										97.25	50.6592	-67.4133	-71.3806	-48.584	-58.3191	-60.8826
97.4	-91.2476										97.3	47.6685	-67.4133	-71.7468	-48.3093	-58.2886	-60.8215
97.45	-90.5762										97.35	44.0063	-67.7795	-71.5942	-48.645	-58.4717	-60.6689
97.5	-89.8132										97.4	39.917	-68.2373	-71.4722	-48.4619	-58.4106	-60.5469
97.55	-88.8977										97.45	35.7056	-68.4204	-71.6553	-48.3704	-58.136	-60.8215
97.6	-87.9211										97.5	30.7007	-68.5425	-71.4722	-48.5229	-58.3801	-60.7605
97.65	-86.7004										97.55	25.7874	-68.573	-71.6247	-48.3704	-58.5022	-60.6079
97.7	-85.5102										97.6	21.0571	-69.0613	-71.5942	-48.3704	-58.3801	-60.5774
97.75	-84.2895										97.65	15.6555	-69.2749	-71.3806	-48.4314	-58.0139	-60.852
97.8	-83.0688										97.7	10.8337	-69.3664	-71.7468	-48.1262	-58.3496	-60.7605
97.85	-81.8481										97.75	6.19507	-69.2749	-71.5027	-48.3398	-58.3191	-60.6384
97.9	-80.3833										97.8	1.25122	-69.5496	-71.6553	-48.2483	-58.1055	-60.4553
97.95	-79.01										97.85	-3.05176	-69.9158	-71.5942	-47.9736	-57.9834	-60.6689
98	-77.6977										97.9	-7.14111	-69.8242	-71.4416	-48.2788	-58.136	-60.6384
98.05	-76.355										97.95	-11.261	-69.8547	-71.5942	-48.0652	-58.1055	-60.4553
98.1	-74.9206										98	-14.7705	-69.7632	-71.228	-47.821	-57.9529	-60.3332
98.15	-73.5779										98.05	-18.7073	-70.0684	-71.5027	-47.9431	-57.8308	-60.5469
98.2	-72.2961										98.1	-22.0642	-70.2209	-71.3501	-47.8516	-58.0139	-60.4553
98.25	-71.167										98.15	-25.116	-70.1904	-71.5027	-47.7905	-58.0444	-60.3943
98.3	-70.0684										98.2	-28.4119	-70.0684	-71.4111	-47.9126	-57.9224	-60.1501
98.35	-68.9392										98.25	-31.1584	-70.0989	-71.1975	-47.5464	-57.7393	-60.4553
98.4	-67.749										98.3	-34.2712	-70.404	-71.4111	-47.9126	-58.0139	-60.4248
98.45	-66.7419										98.35	-36.9568	-70.4956	-71.1975	-47.8516	-58.0139	-60.5164
98.5	-65.6433										98.4	-39.4897	-70.5261	-71.4416	-47.4853	-57.9834	-60.1807
98.55	-64.4836										98.45	-42.2668	-70.4651	-71.3196	-47.7295	-57.6782	-60.1196
98.6	-63.4155										98.5	-44.4641	-70.404	-71.0754	-47.699	-57.9834	-60.3943
98.65	-62.4695										98.55	-46.8445	-70.6482	-71.3806	-47.4243	-57.9529	-60.3943
98.7	-61.4014										98.6	-49.0112	-70.7092	-71.1365	-47.6379	-57.8918	-60.2722
98.75	-60.3638										98.65	-50.6897	-70.7397	-71.167	-47.5464	-57.5561	-59.9365
98.8	-59.4482										98.7	-52.948	-70.7092	-71.228	-47.1497	-57.7698	-60.2112
98.85	-58.6243										98.75	-54.5654	-70.4346	-70.9228	-47.4243	-57.8613	-60.2722
98.9	-57.7087										98.8	-55.8472	-70.6787	-71.228	-47.3022	-57.8003	-60.2112
98.95	-56.8542										98.85	-57.7087	-70.8618	-71.1365	-46.9665	-57.5867	-60.0281
99	-56.0303										98.9	-58.96	-70.8008	-70.8008	-47.1497	-57.5867	-59.967
99.05	-55.1453										98.95	-59.7839	-70.8008	-71.0754	-47.0581	-57.7087	-60.2112
99.1	-54.4434										99	-61.2183	-70.5872	-71.0144	-46.7224	-57.7393	-60.1501
99.15	-53.833										99.05	-62.1033	-70.7092	-70.8923	-46.936	-57.5867	-60.0891
99.2	-53.3447										99.1	-62.7747	-70.9228	-71.0754	-46.9665	-57.4036	-59.845
99.25	-52.6428										99.15	-63.8123	-70.8618	-70.8923	-46.5698	-57.6782	-59.906
99.3	-51.9714										99.2	-64.4226	-70.8618	-70.8923	-46.9055	-57.6782	-60.1807
99.35	-51.3306										99.25	-64.9109	-70.7397	-71.1059	-46.7224	-57.6172	-60.0586
99.4	-50.293										99.3	-65.6128	-70.6787	-70.7092	-46.3257	-57.3425	-59.967
99.45	-49.8657										99.35	-66.1621	-70.9228	-70.7092	-46.6919	-57.3425	-59.8144
99.5	-49.3164										99.4	-66.3757	-71.0449	-70.8923	-46.5698	-57.6172	-59.906
99.55	-48.5229										99.45	-66.6809	-70.9228	-70.7397	-46.2646	-57.4951	-59.9976
99.6	-47.5769										99.5	-67.3523	-70.9228	-70.6787	-46.2952	-57.4646	-59.8755
99.65	-46.6614										99.55	-67.5354	-70.9228	-70.7092	-46.2646	-57.0984	-59.8144
99.7	-45.8679										99.6	-67.5049	-70.7092	-70.5872	-45.8984	-57.3425	-59.6619
99.75	-44.7082										99.65	-68.0237	-70.8618	-70.5261	-45.99	-57.4036	-59.6619
99.8	-42.9993										99.7	-68.2373	-71.0144	-70.7397	-45.8679	-57.373	-59.8144
99.85	-41.3208										99.75	-68.2983	-70.8618	-70.4956	-45.6543	-57.2205	-59.845
99.9	-38.5437										99.8	-68.3899	-70.9228	-70.3735	-45.5017	-56.8848	-59.6619
99.95	-34.0881										99.85	-68.6951	-70.8618	-70.6482	-45.5933	-57.2815	-59.5703
[truncated: 28,165 more rows]

## Sheet: Fig 1 S2c
Time (ms)	MP (mV)	--
0.05	-57.6782	--
0.1	-57.8613	--
0.15	-58.0749	--
0.2	-57.9834	--
0.25	-57.6782	--
0.3	-57.8308	--
0.35	-58.0444	--
0.4	-57.8308	--
0.45	-57.7087	--
0.5	-57.9529	--
0.55	-57.8308	--
0.6	-57.5867	--
0.65	-57.8918	--
0.7	-57.8613	--
0.75	-57.5256	--
0.8	-58.0139	--
0.85	-57.7698	--
0.9	-57.5867	--
0.95	-57.8918	--
1	-57.8003	--
1.05	-57.7393	--
1.1	-57.8613	--
1.15	-57.6782	--
1.2	-57.7698	--
1.25	-57.8308	--
1.3	-57.6172	--
1.35	-57.6477	--
1.4	-57.8003	--
1.45	-57.6172	--
1.5	-57.5867	--
1.55	-57.8613	--
1.6	-57.6172	--
1.65	-57.4951	--
1.7	-57.8003	--
1.75	-57.8003	--
1.8	-57.4951	--
1.85	-57.7698	--
1.9	-57.7698	--
1.95	-57.7087	--
2	-57.4341	--
2.05	-57.8003	--
2.1	-57.8613	--
2.15	-57.5561	--
2.2	-57.4951	--
2.25	-57.7698	--
2.3	-57.7087	--
2.35	-57.5561	--
2.4	-57.4646	--
2.45	-57.7393	--
2.5	-57.7087	--
2.55	-57.4341	--
2.6	-57.5561	--
2.65	-57.7393	--
2.7	-57.8003	--
2.75	-57.5867	--
2.8	-57.5256	--
2.85	-57.8613	--
2.9	-57.8003	--
2.95	-57.6782	--
3	-57.5256	--
3.05	-57.8003	--
3.1	-57.7393	--
3.15	-57.6172	--
3.2	-57.4951	--
3.25	-57.6477	--
3.3	-57.7087	--
3.35	-57.7393	--
3.4	-57.4341	--
3.45	-57.5256	--
3.5	-57.7393	--
3.55	-57.8003	--
3.6	-57.6782	--
3.65	-57.4036	--
3.7	-57.7087	--
3.75	-57.8613	--
3.8	-57.7393	--
3.85	-57.6172	--
3.9	-57.4036	--
3.95	-57.6477	--
4	-57.7698	--
4.05	-57.7087	--
4.1	-57.4951	--
4.15	-57.3425	--
4.2	-57.7087	--
4.25	-57.7393	--
4.3	-57.6782	--
4.35	-57.4951	--
4.4	-57.4036	--
4.45	-57.6172	--
4.5	-57.7698	--
4.55	-57.7087	--
4.6	-57.6172	--
4.65	-57.373	--
4.7	-57.4036	--
4.75	-57.7087	--
4.8	-57.7393	--
4.85	-57.6782	--
4.9	-57.4951	--
4.95	-57.251	--
5	-57.4951	--
5.05	-57.5561	--
5.1	-57.6477	--
5.15	-57.4341	--
5.2	-57.3425	--
5.25	-57.2815	--
5.3	-57.4341	--
5.35	-57.5867	--
5.4	-57.5561	--
5.45	-57.5867	--
5.5	-57.4341	--
5.55	-57.251	--
5.6	-57.312	--
5.65	-57.5867	--
5.7	-57.6172	--
5.75	-57.4646	--
5.8	-57.4341	--
5.85	-57.2815	--
5.9	-57.1594	--
5.95	-57.312	--
6	-57.4341	--
6.05	-57.4036	--
6.1	-57.312	--
6.15	-57.3425	--
6.2	-57.251	--
6.25	-57.0984	--
6.3	-57.1289	--
6.35	-57.4036	--
6.4	-57.4951	--
6.45	-57.4646	--
6.5	-57.4646	--
6.55	-57.4646	--
6.6	-57.2815	--
6.65	-57.0374	--
6.7	-57.1289	--
6.75	-57.251	--
6.8	-57.4036	--
6.85	-57.4341	--
6.9	-57.3425	--
6.95	-57.3425	--
7	-57.3425	--
7.05	-57.1594	--
7.1	-57.0984	--
7.15	-57.0984	--
7.2	-57.1594	--
7.25	-57.2815	--
7.3	-57.4951	--
7.35	-57.4646	--
7.4	-57.4036	--
7.45	-57.373	--
7.5	-57.373	--
7.55	-57.373	--
7.6	-57.1899	--
7.65	-57.0984	--
7.7	-57.0068	--
7.75	-57.0374	--
7.8	-57.2205	--
7.85	-57.312	--
7.9	-57.3425	--
7.95	-57.2815	--
8	-57.2205	--
8.05	-57.0984	--
8.1	-57.0679	--
8.15	-56.8542	--
8.2	-57.0679	--
8.25	-57.312	--
8.3	-57.1594	--
8.35	-57.1899	--
8.4	-57.0068	--
8.45	-57.0984	--
8.5	-57.2815	--
8.55	-57.1594	--
8.6	-56.8848	--
8.65	-57.0374	--
8.7	-57.251	--
8.75	-57.0984	--
8.8	-56.9458	--
8.85	-57.2815	--
8.9	-57.1289	--
8.95	-56.9458	--
9	-57.251	--
9.05	-57.2205	--
9.1	-57.0679	--
9.15	-57.312	--
9.2	-57.0984	--
9.25	-57.0984	--
9.3	-57.312	--
9.35	-56.9763	--
9.4	-57.0984	--
9.45	-57.1899	--
9.5	-56.9458	--
9.55	-57.0984	--
9.6	-57.1289	--
9.65	-56.7932	--
9.7	-57.1289	--
9.75	-57.0679	--
9.8	-56.9153	--
9.85	-56.9153	--
9.9	-57.1899	--
9.95	-57.0068	--
10	-56.7627	--
10.05	-57.1289	--
10.1	-57.0984	--
10.15	-56.7627	--
10.2	-56.9763	--
10.25	-57.0068	--
10.3	-56.7627	--
10.35	-56.7017	--
10.4	-56.9763	--
10.45	-56.8237	--
10.5	-56.5491	--
10.55	-56.7322	--
10.6	-56.9458	--
10.65	-56.7932	--
10.7	-56.3965	--
10.75	-56.8542	--
10.8	-56.8848	--
10.85	-56.8542	--
10.9	-56.5186	--
10.95	-56.8848	--
11	-56.9458	--
11.05	-56.8237	--
11.1	-56.4575	--
11.15	-56.7932	--
11.2	-56.9153	--
11.25	-56.8542	--
11.3	-56.5491	--
11.35	-56.7017	--
11.4	-56.8848	--
11.45	-56.7932	--
11.5	-56.6406	--
11.55	-56.5796	--
11.6	-56.9458	--
11.65	-56.7932	--
11.7	-56.6711	--
11.75	-56.488	--
11.8	-56.8848	--
11.85	-56.9763	--
11.9	-56.7932	--
11.95	-56.6406	--
12	-56.6406	--
12.05	-56.9153	--
12.1	-56.7932	--
12.15	-56.7017	--
12.2	-56.488	--
12.25	-56.5796	--
12.3	-56.8542	--
12.35	-56.7322	--
12.4	-56.6101	--
12.45	-56.4575	--
12.5	-56.5491	--
12.55	-56.7627	--
12.6	-56.7017	--
12.65	-56.6711	--
12.7	-56.427	--
12.75	-56.5491	--
12.8	-56.7932	--
12.85	-56.6711	--
12.9	-56.6406	--
12.95	-56.3965	--
13	-56.3965	--
13.05	-56.6101	--
13.1	-56.7017	--
13.15	-56.6711	--
13.2	-56.5186	--
13.25	-56.1829	--
13.3	-56.5186	--
13.35	-56.6406	--
13.4	-56.6101	--
13.45	-56.5186	--
13.5	-56.5491	--
13.55	-56.2744	--
13.6	-56.488	--
13.65	-56.6711	--
13.7	-56.6406	--
13.75	-56.6711	--
13.8	-56.4575	--
13.85	-56.2134	--
13.9	-56.5186	--
13.95	-56.6711	--
14	-56.6711	--
14.05	-56.6406	--
14.1	-56.5186	--
14.15	-56.427	--
14.2	-56.3965	--
14.25	-56.5491	--
14.3	-56.6711	--
14.35	-56.7627	--
14.4	-56.6101	--
14.45	-56.5796	--
14.5	-56.488	--
14.55	-56.488	--
14.6	-56.6101	--
14.65	-56.6711	--
14.7	-56.6711	--
14.75	-56.7322	--
14.8	-56.6711	--
14.85	-56.5491	--
14.9	-56.3354	--
14.95	-56.2744	--
15	-56.488	--
15.05	-56.7017	--
15.1	-56.6406	--
15.15	-56.5186	--
15.2	-56.6101	--
15.25	-56.5796	--
15.3	-56.488	--
15.35	-56.366	--
15.4	-56.3965	--
15.45	-56.488	--
15.5	-56.5796	--
15.55	-56.6711	--
15.6	-56.7017	--
15.65	-56.6406	--
15.7	-56.5796	--
15.75	-56.4575	--
15.8	-56.3354	--
15.85	-56.2134	--
15.9	-56.1829	--
15.95	-56.2134	--
16	-56.3354	--
16.05	-56.488	--
16.1	-56.488	--
16.15	-56.4575	--
16.2	-56.427	--
16.25	-56.4575	--
16.3	-56.3965	--
16.35	-56.2134	--
16.4	-56.2134	--
16.45	-56.3049	--
16.5	-56.5491	--
16.55	-56.5491	--
16.6	-56.5186	--
16.65	-56.488	--
16.7	-56.2439	--
16.75	-56.488	--
16.8	-56.6406	--
16.85	-56.488	--
16.9	-56.2134	--
16.95	-56.4575	--
17	-56.5796	--
17.05	-56.488	--
17.1	-56.427	--
17.15	-56.7627	--
17.2	-56.5796	--
17.25	-56.2744	--
17.3	-56.7322	--
17.35	-56.7017	--
17.4	-56.3049	--
17.45	-56.6711	--
17.5	-56.6101	--
17.55	-56.366	--
17.6	-56.6101	--
17.65	-56.5491	--
17.7	-56.427	--
17.75	-56.7322	--
17.8	-56.5491	--
17.85	-56.4575	--
17.9	-56.7627	--
17.95	-56.6101	--
18	-56.6101	--
18.05	-56.7627	--
18.1	-56.488	--
18.15	-56.8237	--
18.2	-56.8237	--
18.25	-56.4575	--
18.3	-56.7322	--
18.35	-56.8237	--
18.4	-56.7017	--
18.45	-56.7322	--
18.5	-56.8542	--
18.55	-56.7627	--
18.6	-56.7017	--
18.65	-56.9153	--
18.7	-56.8542	--
18.75	-56.488	--
18.8	-56.9763	--
18.85	-56.9458	--
18.9	-56.5796	--
18.95	-56.8848	--
19	-57.1594	--
19.05	-56.9763	--
19.1	-56.7322	--
19.15	-57.1594	--
19.2	-57.0984	--
19.25	-56.9763	--
19.3	-56.9153	--
19.35	-57.0984	--
19.4	-57.1289	--
19.45	-56.8542	--
19.5	-57.0679	--
19.55	-57.1289	--
19.6	-57.0068	--
19.65	-56.7017	--
19.7	-57.1289	--
19.75	-57.0984	--
19.8	-57.0068	--
19.85	-56.8237	--
19.9	-57.0679	--
19.95	-57.1899	--
20	-57.0679	--
20.05	-56.8542	--
20.1	-57.1594	--
20.15	-57.1899	--
20.2	-57.1899	--
20.25	-57.0068	--
20.3	-57.1289	--
20.35	-57.3425	--
20.4	-57.1594	--
20.45	-57.0984	--
20.5	-56.9458	--
20.55	-57.251	--
20.6	-57.3425	--
20.65	-57.2815	--
20.7	-57.0374	--
20.75	-57.2205	--
20.8	-57.4646	--
20.85	-57.4036	--
20.9	-57.4036	--
20.95	-57.312	--
21	-57.4646	--
21.05	-57.5867	--
21.1	-57.6782	--
21.15	-57.4646	--
21.2	-57.2815	--
21.25	-57.5867	--
21.3	-57.5561	--
21.35	-57.5561	--
21.4	-57.4341	--
21.45	-57.312	--
21.5	-57.5561	--
21.55	-57.5867	--
21.6	-57.5561	--
21.65	-57.4036	--
21.7	-57.3425	--
21.75	-57.6477	--
21.8	-57.7087	--
21.85	-57.6477	--
21.9	-57.6172	--
21.95	-57.4341	--
22	-57.5867	--
22.05	-57.7393	--
22.1	-57.6782	--
22.15	-57.6782	--
22.2	-57.5561	--
22.25	-57.4951	--
22.3	-57.5561	--
22.35	-57.7393	--
22.4	-57.8003	--
22.45	-57.7393	--
22.5	-57.5867	--
22.55	-57.4951	--
22.6	-57.7393	--
22.65	-57.9529	--
22.7	-57.8003	--
22.75	-57.8613	--
22.8	-57.7393	--
22.85	-57.6477	--
22.9	-57.5561	--
22.95	-57.7393	--
23	-57.8613	--
23.05	-57.8918	--
23.1	-57.8613	--
23.15	-57.6782	--
23.2	-57.4951	--
23.25	-57.5867	--
23.3	-57.7087	--
23.35	-57.9224	--
23.4	-57.8918	--
23.45	-57.9224	--
23.5	-57.8918	--
23.55	-57.7393	--
23.6	-57.5561	--
23.65	-57.7087	--
23.7	-57.9224	--
23.75	-57.8918	--
23.8	-57.8613	--
23.85	-57.8918	--
23.9	-57.8308	--
23.95	-57.8308	--
24	-57.7087	--
24.05	-57.5867	--
24.1	-57.6477	--
24.15	-57.9224	--
24.2	-58.0444	--
24.25	-57.9834	--
24.3	-57.9224	--
24.35	-57.9834	--
24.4	-57.9224	--
24.45	-57.8308	--
24.5	-57.7393	--
24.55	-57.7698	--
24.6	-57.7698	--
24.65	-58.0139	--
24.7	-58.0749	--
24.75	-57.9834	--
24.8	-57.9224	--
24.85	-57.7393	--
24.9	-57.7393	--
24.95	-57.9224	--
25	-58.0139	--
25.05	-57.9834	--
25.1	-57.6477	--
25.15	-57.9834	--
25.2	-58.0444	--
25.25	-57.9834	--
25.3	-57.7698	--
25.35	-58.197	--
25.4	-58.1665	--
25.45	-57.7087	--
25.5	-58.197	--
25.55	-58.136	--
25.6	-57.8918	--
25.65	-58.1665	--
25.7	-58.0749	--
25.75	-57.8613	--
25.8	-58.1665	--
25.85	-58.0444	--
25.9	-57.9529	--
25.95	-58.136	--
26	-57.9834	--
26.05	-58.136	--
26.1	-58.197	--
26.15	-57.8003	--
26.2	-58.2581	--
26.25	-58.2275	--
26.3	-57.9529	--
26.35	-58.2886	--
26.4	-58.2275	--
26.45	-58.136	--
26.5	-58.3191	--
26.55	-58.1665	--
26.6	-58.0749	--
26.65	-58.3801	--
26.7	-58.3801	--
26.75	-58.0139	--
26.8	-58.3801	--
26.85	-58.4106	--
26.9	-58.0444	--
26.95	-58.3496	--
27	-58.3496	--
27.05	-58.2886	--
27.1	-58.1665	--
27.15	-58.4412	--
27.2	-58.4412	--
27.25	-58.0749	--
27.3	-58.4717	--
27.35	-58.5327	--
27.4	-58.3801	--
27.45	-58.1055	--
27.5	-58.5327	--
27.55	-58.5022	--
27.6	-58.2581	--
27.65	-58.3496	--
27.7	-58.5022	--
27.75	-58.5937	--
27.8	-58.2581	--
27.85	-58.4106	--
27.9	-58.6548	--
27.95	-58.5632	--
28	-58.2581	--
28.05	-58.5937	--
28.1	-58.7463	--
28.15	-58.6853	--
28.2	-58.3496	--
28.25	-58.6243	--
28.3	-58.7769	--
28.35	-58.7463	--
28.4	-58.4412	--
28.45	-58.5632	--
28.5	-58.7158	--
28.55	-58.7158	--
28.6	-58.5022	--
28.65	-58.5022	--
28.7	-58.7158	--
28.75	-58.7158	--
28.8	-58.5937	--
28.85	-58.4412	--
28.9	-58.6853	--
28.95	-58.9294	--
29	-58.7158	--
29.05	-58.4412	--
29.1	-58.5937	--
29.15	-58.8989	--
29.2	-58.8379	--
29.25	-58.6548	--
29.3	-58.3801	--
29.35	-58.6548	--
29.4	-58.8379	--
29.45	-58.7769	--
29.5	-58.5937	--
29.55	-58.3801	--
29.6	-58.7769	--
29.65	-58.8074	--
29.7	-58.7769	--
29.75	-58.5937	--
29.8	-58.5632	--
29.85	-58.8074	--
29.9	-58.8379	--
29.95	-58.8379	--
30	-58.7769	--
30.05	-58.6548	--
30.1	-58.7463	--
30.15	-58.8684	--
30.2	-58.8074	--
30.25	-58.7769	--
30.3	-58.6548	--
30.35	-58.6853	--
30.4	-58.8989	--
30.45	-58.8989	--
30.5	-58.8989	--
30.55	-58.7463	--
30.6	-58.5632	--
30.65	-58.7769	--
30.7	-58.96	--
30.75	-58.9294	--
30.8	-58.96	--
30.85	-58.8379	--
30.9	-58.7158	--
30.95	-58.7769	--
31	-58.9905	--
31.05	-58.9905	--
31.1	-59.1125	--
31.15	-58.8684	--
31.2	-58.6243	--
31.25	-58.7463	--
31.3	-58.8379	--
31.35	-59.0515	--
31.4	-58.96	--
31.45	-58.8684	--
31.5	-58.8684	--
31.55	-58.6548	--
31.6	-58.7158	--
31.65	-58.8379	--
31.7	-59.082	--
31.75	-59.021	--
31.8	-58.9294	--
31.85	-58.8989	--
31.9	-58.7769	--
31.95	-58.6853	--
32	-58.6853	--
32.05	-58.9294	--
32.1	-58.96	--
32.15	-58.9294	--
32.2	-58.9905	--
32.25	-58.8684	--
32.3	-58.8074	--
32.35	-58.6548	--
32.4	-58.7158	--
32.45	-58.7769	--
32.5	-58.96	--
32.55	-59.1125	--
32.6	-59.0515	--
32.65	-58.96	--
32.7	-59.021	--
32.75	-58.9294	--
32.8	-58.8684	--
32.85	-58.7158	--
32.9	-58.7463	--
32.95	-58.96	--
33	-59.082	--
33.05	-58.9905	--
33.1	-58.9905	--
33.15	-58.8684	--
33.2	-58.6548	--
33.25	-58.7769	--
33.3	-59.021	--
33.35	-58.8989	--
33.4	-58.8989	--
33.45	-58.6243	--
33.5	-58.9905	--
33.55	-59.021	--
33.6	-58.8684	--
33.65	-59.0515	--
33.7	-59.082	--
33.75	-58.96	--
33.8	-58.8989	--
33.85	-59.2041	--
33.9	-59.021	--
33.95	-58.7769	--
34	-59.1736	--
34.05	-58.96	--
34.1	-58.96	--
34.15	-59.1125	--
34.2	-58.8074	--
34.25	-59.082	--
34.3	-59.0515	--
34.35	-58.7463	--
34.4	-59.082	--
34.45	-59.1736	--
34.5	-58.8379	--
34.55	-59.1431	--
34.6	-58.96	--
34.65	-58.8684	--
34.7	-59.1431	--
34.75	-58.96	--
34.8	-58.8379	--
34.85	-59.0515	--
34.9	-58.8684	--
34.95	-58.7769	--
35	-59.082	--
35.05	-58.96	--
35.1	-58.7769	--
35.15	-59.021	--
35.2	-58.96	--
35.25	-58.6548	--
35.3	-59.021	--
35.35	-59.082	--
35.4	-58.96	--
35.45	-58.8074	--
35.5	-59.1431	--
35.55	-59.1431	--
35.6	-58.7158	--
35.65	-58.9905	--
35.7	-59.1431	--
35.75	-58.9905	--
35.8	-58.7463	--
35.85	-59.0515	--
35.9	-59.0515	--
35.95	-58.8684	--
36	-58.8074	--
36.05	-59.1431	--
36.1	-59.0515	--
36.15	-59.021	--
36.2	-58.8379	--
36.25	-59.0515	--
36.3	-58.96	--
36.35	-58.8989	--
36.4	-58.96	--
36.45	-59.0515	--
36.5	-59.021	--
36.55	-58.7769	--
36.6	-58.7158	--
36.65	-58.9905	--
36.7	-58.8684	--
36.75	-58.6548	--
36.8	-58.5937	--
36.85	-58.8989	--
36.9	-58.8989	--
36.95	-58.7463	--
37	-58.6548	--
37.05	-58.8989	--
37.1	-58.9294	--
37.15	-58.8989	--
37.2	-58.7769	--
37.25	-58.8684	--
37.3	-58.8989	--
37.35	-58.8379	--
37.4	-58.7158	--
37.45	-58.5327	--
37.5	-58.8074	--
37.55	-58.8684	--
37.6	-58.7769	--
37.65	-58.6853	--
37.7	-58.5327	--
37.75	-58.7769	--
37.8	-58.7769	--
37.85	-58.7769	--
37.9	-58.5022	--
37.95	-58.5022	--
38	-58.7769	--
38.05	-58.8074	--
38.1	-58.8074	--
38.15	-58.5022	--
38.2	-58.5022	--
38.25	-58.7158	--
38.3	-58.8379	--
38.35	-58.8074	--
38.4	-58.5632	--
38.45	-58.4412	--
38.5	-58.6548	--
38.55	-58.8074	--
38.6	-58.6853	--
38.65	-58.5937	--
38.7	-58.5022	--
38.75	-58.5632	--
38.8	-58.8074	--
38.85	-58.7463	--
38.9	-58.8074	--
38.95	-58.6548	--
39	-58.4106	--
39.05	-58.5632	--
39.1	-58.8074	--
39.15	-58.7463	--
39.2	-58.7158	--
39.25	-58.5937	--
39.3	-58.4106	--
39.35	-58.5022	--
39.4	-58.7158	--
39.45	-58.7158	--
39.5	-58.6548	--
39.55	-58.5937	--
39.6	-58.5327	--
39.65	-58.3801	--
39.7	-58.5632	--
39.75	-58.8074	--
39.8	-58.8074	--
39.85	-58.7463	--
39.9	-58.8074	--
39.95	-58.6548	--
40	-58.5327	--
40.05	-58.5632	--
40.1	-58.7158	--
40.15	-58.9294	--
40.2	-58.8074	--
40.25	-58.8074	--
40.3	-58.7769	--
40.35	-58.5937	--
40.4	-58.3801	--
40.45	-58.4717	--
40.5	-58.5022	--
40.55	-58.4717	--
40.6	-58.4106	--
40.65	-57.9834	--
40.7	-57.6782	--
40.75	-57.312	--
40.8	-56.8237	--
40.85	-56.2744	--
40.9	-55.8472	--
40.95	-55.603	--
41	-55.3284	--
41.05	-54.9011	--
41.1	-54.5654	--
41.15	-54.0466	--
41.2	-53.6804	--
41.25	-53.2532	--
41.3	-52.7649	--
41.35	-52.2766	--
41.4	-52.0019	--
41.45	-51.9409	--
41.5	-51.5442	--
41.55	-51.0559	--
41.6	-50.5676	--
41.65	-50.0488	--
41.7	-49.9878	--
41.75	-49.408	--
41.8	-48.8892	--
41.85	-48.2483	--
41.9	-48.0652	--
41.95	-47.5159	--
42	-46.6003	--
42.05	-46.1426	--
42.1	-45.5322	--
42.15	-44.5862	--
42.2	-43.9148	--
42.25	-43.0298	--
42.3	-41.5039	--
42.35	-40.1306	--
42.4	-38.0249	--
42.45	-34.1797	--
42.5	-29.3884	--
42.55	-21.7895	--
42.6	-11.8103	--
42.65	-1.25122	--
42.7	10.3455	--
42.75	21.7285	--
42.8	31.5857	--
42.85	39.856	--
42.9	45.5017	--
42.95	48.584	--
43	48.8892	--
43.05	46.3867	--
43.1	41.1072	--
43.15	33.8135	--
43.2	24.4751	--
43.25	13.8245	--
43.3	2.68555	--
43.35	-8.72803	--
43.4	-20.3857	--
43.45	-31.1279	--
43.5	-40.863	--
43.55	-50.2624	--
43.6	-58.2275	--
43.65	-64.8193	--
43.7	-70.4346	--
43.75	-75.4394	--
43.8	-79.1016	--
43.85	-81.6345	--
43.9	-83.4656	--
43.95	-84.9609	--
44	-85.5408	--
44.05	-85.6934	--
44.1	-85.5102	--
44.15	-85.4187	--
44.2	-84.9304	--
44.25	-84.0454	--
44.3	-83.0078	--
44.35	-82.55	--
44.4	-81.8176	--
44.45	-80.9326	--
44.5	-79.7424	--
44.55	-79.0405	--
44.6	-78.5522	--
44.65	-77.6977	--
44.7	-76.7822	--
44.75	-75.8972	--
44.8	-75.5005	--
44.85	-74.9206	--
44.9	-74.3713	--
44.95	-73.4253	--
45	-72.7234	--
45.05	-72.4487	--
45.1	-71.9299	--
45.15	-71.4111	--
45.2	-70.7397	--
45.25	-70.343	--
45.3	-70.0378	--
45.35	-69.6106	--
45.4	-69.2139	--
45.45	-68.5425	--
45.5	-68.2678	--
45.55	-67.9932	--
45.6	-67.5659	--
45.65	-67.1692	--
45.7	-66.4673	--
45.75	-66.1926	--
45.8	-66.04	--
45.85	-65.6738	--
45.9	-65.3686	--
45.95	-64.8193	--
46	-64.4531	--
46.05	-64.331	--
46.1	-64.209	--
46.15	-63.8123	--
46.2	-63.385	--
46.25	-62.8967	--
46.3	-62.8662	--
46.35	-62.7136	--
46.4	-62.3169	--
46.45	-62.1033	--
46.5	-61.676	--
46.55	-61.3708	--
46.6	-61.2793	--
46.65	-61.1267	--
46.7	-60.791	--
46.75	-60.5164	--
46.8	-60.2417	--
46.85	-59.906	--
46.9	-59.8755	--
46.95	-59.845	--
47	-59.4788	--
47.05	-59.2346	--
47.1	-58.8989	--
47.15	-58.6243	--
47.2	-58.5632	--
47.25	-58.4412	--
47.3	-58.197	--
47.35	-57.9834	--
47.4	-57.7393	--
47.45	-57.3425	--
47.5	-57.0679	--
47.55	-57.1289	--
47.6	-57.0374	--
47.65	-56.7627	--
47.7	-56.6101	--
47.75	-56.2744	--
47.8	-56.0608	--
47.85	-55.8166	--
47.9	-55.8472	--
47.95	-55.7251	--
48	-55.6946	--
48.05	-55.4199	--
48.1	-55.0842	--
48.15	-54.8401	--
48.2	-54.5959	--
48.25	-54.5044	--
48.3	-54.4434	--
48.35	-54.3823	--
48.4	-54.1992	--
48.45	-53.894	--
48.5	-53.8025	--
48.55	-53.4363	--
48.6	-53.1616	--
48.65	-52.9175	--
48.7	-52.7649	--
48.75	-52.7649	--
48.8	-52.6428	--
48.85	-52.4292	--
48.9	-52.2461	--
48.95	-51.9409	--
49	-51.6663	--
49.05	-51.3916	--
49.1	-51.0559	--
49.15	-50.7812	--
49.2	-50.7202	--
49.25	-50.5676	--
49.3	-50.354	--
49.35	-50.0793	--
49.4	-49.7436	--
49.45	-49.3164	--
49.5	-49.0417	--
49.55	-48.6145	--
49.6	-48.1873	--
49.65	-47.699	--
49.7	-47.5464	--
49.75	-47.2717	--
49.8	-46.7834	--
49.85	-46.2952	--
49.9	-45.6848	--
49.95	-44.8608	--
50	-44.1894	--
50.05	-43.6707	--
50.1	-42.7551	--
50.15	-41.4429	--
50.2	-39.9475	--
50.25	-38.0554	--
50.3	-34.9121	--
50.35	-29.9683	--
50.4	-23.6206	--
50.45	-14.74	--
50.5	-3.84522	--
50.55	6.92749	--
50.6	18.0664	--
50.65	28.5339	--
50.7	36.7432	--
50.75	42.9077	--
50.8	46.9971	--
50.85	47.821	--
50.9	46.051	--
50.95	42.1143	--
51	35.1257	--
51.05	26.7639	--
51.1	17.2424	--
51.15	6.073	--
51.2	-4.94385	--
51.25	-15.8691	--
51.3	-26.8555	--
51.35	-36.8042	--
51.4	-45.6848	--
51.45	-54.1077	--
51.5	-61.1572	--
51.55	-66.864	--
51.6	-72.2351	--
51.65	-76.1414	--
51.7	-79.01	--
51.75	-81.2378	--
51.8	-83.2214	--
51.85	-84.137	--
51.9	-84.3811	--
51.95	-84.4726	--
52	-84.5947	--
52.05	-84.1064	--
52.1	-83.4045	--
52.15	-82.7026	--
52.2	-82.0618	--
52.25	-81.2378	--
52.3	-80.3528	--
52.35	-79.3152	--
52.4	-78.8269	--
52.45	-78.0945	--
52.5	-77.1789	--
52.55	-76.1414	--
52.6	-75.592	--
52.65	-75.1648	--
52.7	-74.4934	--
52.75	-73.6084	--
52.8	-72.8455	--
52.85	-72.6318	--
52.9	-72.0825	--
52.95	-71.4416	--
53	-70.6177	--
53.05	-70.1294	--
53.1	-69.9768	--
53.15	-69.3664	--
53.2	-68.8171	--
53.25	-68.1152	--
53.3	-68.0847	--
53.35	-67.688	--
53.4	-67.2302	--
53.45	-66.7725	--
53.5	-66.2537	--
53.55	-66.2231	--
53.6	-65.7349	--
53.65	-65.4297	--
53.7	-64.9719	--
53.75	-64.3921	--
53.8	-64.3616	--
53.85	-63.9954	--
53.9	-63.6597	--
53.95	-63.2019	--
54	-62.8662	--
54.05	-62.8052	--
54.1	-62.561	--
54.15	-62.439	--
54.2	-62.0117	--
54.25	-61.5845	--
54.3	-61.554	--
54.35	-61.5845	--
54.4	-61.2793	--
54.45	-61.0046	--
54.5	-60.6079	--
54.55	-60.3638	--
54.6	-60.5164	--
54.65	-60.2417	--
54.7	-59.9976	--
54.75	-59.6924	--
54.8	-59.3262	--
54.85	-59.2651	--
54.9	-59.3262	--
54.95	-59.082	--
55	-58.8684	--
55.05	-58.5937	--
55.1	-58.2275	--
55.15	-58.1055	--
55.2	-58.197	--
55.25	-58.0444	--
55.3	-57.7087	--
55.35	-57.4036	--
55.4	-57.0374	--
55.45	-56.8848	--
55.5	-56.8237	--
55.55	-56.7017	--
55.6	-56.488	--
55.65	-56.2744	--
55.7	-55.9387	--
55.75	-55.6335	--
55.8	-55.5115	--
55.85	-55.542	--
55.9	-55.4504	--
55.95	-55.2368	--
56	-55.1147	--
56.05	-54.9011	--
56.1	-54.657	--
56.15	-54.4128	--
56.2	-54.4434	--
56.25	-54.4434	--
56.3	-54.3213	--
56.35	-54.0771	--
56.4	-53.772	--
56.45	-53.5278	--
56.5	-53.3447	--
56.55	-53.2227	--
56.6	-53.2532	--
56.65	-53.1616	--
56.7	-53.009	--
56.75	-52.7954	--
56.8	-52.6123	--
56.85	-52.3987	--
56.9	-52.1851	--
56.95	-51.8799	--
57	-51.7883	--
57.05	-51.8188	--
57.1	-51.7578	--
57.15	-51.6663	--
57.2	-51.3306	--
57.25	-51.178	--
57.3	-50.9949	--
57.35	-50.7812	--
57.4	-50.4456	--
57.45	-50.0488	--
57.5	-49.9573	--
57.55	-49.8657	--
57.6	-49.7436	--
57.65	-49.4995	--
57.7	-49.1638	--
57.75	-48.9197	--
57.8	-48.645	--
57.85	-48.3398	--
57.9	-47.9736	--
57.95	-47.6379	--
58	-47.1497	--
58.05	-46.814	--
58.1	-46.6614	--
58.15	-46.3867	--
58.2	-45.8984	--
58.25	-45.227	--
58.3	-44.3726	--
58.35	-43.9148	--
58.4	-43.3044	--
58.45	-42.4805	--
58.5	-41.1377	--
58.55	-39.7339	--
58.6	-38.3301	--
58.65	-35.7971	--
58.7	-31.4941	--
58.75	-26.2146	--
58.8	-18.5852	--
58.85	-8.57544	--
58.9	1.83106	--
58.95	12.8174	--
59	23.5291	--
59.05	32.4707	--
59.1	39.7644	--
59.15	44.9524	--
59.2	47.0276	--
59.25	46.6919	--
59.3	44.22	--
59.35	38.6047	--
59.4	31.25	--
59.45	22.5525	--
59.5	11.9324	--
59.55	1.15967	--
59.6	-9.552	--
59.65	-20.8435	--
59.7	-31.0364	--
59.75	-40.4053	--
59.8	-49.4385	--
59.85	-57.1594	--
59.9	-63.446	--
59.95	-69.1833	--
60	-73.822	--
60.05	-77.2705	--
60.1	-79.895	--
60.15	-82.1228	--
60.2	-83.3435	--
60.25	-83.9233	--
60.3	-84.1675	--
60.35	-84.5337	--
60.4	-84.137	--
60.45	-83.4656	--
60.5	-82.8552	--
60.55	-82.3364	--
60.6	-81.604	--
60.65	-80.7495	--
60.7	-79.7424	--
60.75	-79.1016	--
60.8	-78.3081	--
60.85	-77.4841	--
60.9	-76.4465	--
60.95	-75.8362	--
61	-75.2563	--
61.05	-74.4629	--
61.1	-73.7915	--
61.15	-72.9065	--
61.2	-72.6013	--
61.25	-72.0825	--
61.3	-71.4416	--
61.35	-70.7397	--
61.4	-70.1294	--
61.45	-70.0073	--
61.5	-69.4275	--
61.55	-68.9392	--
61.6	-68.2678	--
61.65	-67.8406	--
61.7	-67.5659	--
61.75	-67.1997	--
61.8	-66.6809	--
61.85	-65.918	--
61.9	-65.7959	--
61.95	-65.5823	--
62	-65.1245	--
62.05	-64.6667	--
62.1	-63.9954	--
62.15	-63.9343	--
62.2	-63.8123	--
62.25	-63.446	--
62.3	-63.1714	--
62.35	-62.561	--
62.4	-62.4695	--
62.45	-62.3779	--
62.5	-62.1033	--
62.55	-61.8896	--
62.6	-61.4319	--
62.65	-61.2183	--
62.7	-61.0962	--
62.75	-60.9131	--
62.8	-60.6689	--
62.85	-60.2722	--
62.9	-59.8755	--
62.95	-59.7839	--
63	-59.7534	--
63.05	-59.5398	--
63.1	-59.3872	--
63.15	-59.021	--
63.2	-58.6853	--
63.25	-58.7769	--
63.3	-58.6853	--
63.35	-58.5327	--
63.4	-58.3801	--
63.45	-58.0444	--
63.5	-57.8918	--
63.55	-57.7087	--
63.6	-57.7393	--
63.65	-57.6782	--
63.7	-57.4036	--
63.75	-57.1899	--
63.8	-56.7932	--
63.85	-56.7017	--
63.9	-56.7017	--
63.95	-56.7322	--
64	-56.488	--
64.05	-56.366	--
64.1	-56.1218	--
64.15	-55.8472	--
64.2	-55.6946	--
64.25	-55.7556	--
64.3	-55.8472	--
64.35	-55.603	--
64.4	-55.3589	--
64.45	-55.2673	--
64.5	-54.9927	--
64.55	-54.8096	--
64.6	-54.6265	--
64.65	-54.5959	--
64.7	-54.5044	--
64.75	-54.3213	--
64.8	-54.2297	--
64.85	-53.894	--
64.9	-53.6194	--
64.95	-53.3447	--
65	-53.2837	--
65.05	-53.2837	--
65.1	-53.2227	--
65.15	-53.1006	--
65.2	-52.8259	--
65.25	-52.5513	--
65.3	-52.3376	--
65.35	-52.0325	--
65.4	-51.7883	--
65.45	-51.6663	--
65.5	-51.5137	--
65.55	-51.5442	--
65.6	-51.2695	--
65.65	-51.0864	--
65.7	-50.8728	--
65.75	-50.5981	--
65.8	-50.415	--
65.85	-50.1709	--
65.9	-49.8962	--
65.95	-49.6826	--
66	-49.5911	--
66.05	-49.469	--
66.1	-49.3164	--
66.15	-49.1333	--
66.2	-48.8892	--
66.25	-48.645	--
66.3	-48.2788	--
66.35	-47.9431	--
66.4	-47.5769	--
66.45	-47.1191	--
66.5	-46.936	--
66.55	-46.7834	--
66.6	-46.3257	--
66.65	-45.929	--
66.7	-45.2576	--
66.75	-44.7998	--
66.8	-44.4336	--
66.85	-43.7622	--
66.9	-42.6941	--
66.95	-41.8091	--
67	-40.863	--
67.05	-39.2761	--
67.1	-36.9873	--
67.15	-34.2102	--
67.2	-29.541	--
67.25	-22.583	--
67.3	-14.3127	--
67.35	-4.02832	--
67.4	7.20215	--
67.45	17.7307	--
67.5	27.71	--
67.55	36.1938	--
67.6	42.1143	--
67.65	45.9595	--
67.7	47.2107	--
67.75	45.4102	--
67.8	41.5649	--
67.85	35.3699	--
67.9	26.9165	--
67.95	17.4255	--
68	6.98853	--
68.05	-4.15039	--
68.1	-15.0146	--
68.15	-25.5127	--
68.2	-35.675	--
68.25	-44.6777	--
68.3	-52.6428	--
68.35	-60.0281	--
68.4	-66.1621	--
68.45	-70.9839	--
68.5	-74.9512	--
68.55	-78.4302	--
68.6	-80.7495	--
68.65	-82.2449	--
68.7	-83.2825	--
68.75	-84.259	--
68.8	-84.3506	--
68.85	-83.9844	--
68.9	-83.4961	--
68.95	-83.2825	--
69	-82.6111	--
69.05	-81.665	--
69.1	-80.658	--
69.15	-80.0781	--
69.2	-79.3762	--
69.25	-78.4912	--
69.3	-77.4536	--
69.35	-76.5076	--
69.4	-76.0498	--
69.45	-75.3784	--
69.5	-74.6155	--
69.55	-73.6999	--
69.6	-73.2422	--
69.65	-72.8455	--
69.7	-72.0825	--
69.75	-71.5027	--
69.8	-70.7397	--
69.85	-70.4956	--
69.9	-70.0684	--
69.95	-69.519	--
70	-68.8782	--
70.05	-68.2373	--
70.1	-68.0237	--
70.15	-67.749	--
70.2	-67.2302	--
70.25	-66.6809	--
70.3	-66.1926	--
70.35	-66.0095	--
70.4	-65.8264	--
70.45	-65.3686	--
70.5	-64.8498	--
70.55	-64.3921	--
70.6	-64.1479	--
70.65	-64.0564	--
70.7	-63.7512	--
70.75	-63.3545	--
70.8	-62.9272	--
70.85	-62.5915	--
70.9	-62.6221	--
70.95	-62.4084	--
71	-61.9202	--
71.05	-61.6455	--
71.1	-61.2183	--
71.15	-61.1877	--
71.2	-61.1572	--
71.25	-60.791	--
71.3	-60.6384	--
71.35	-60.2112	--
71.4	-59.906	--
71.45	-59.845	--
71.5	-59.9365	--
71.55	-59.6313	--
71.6	-59.4482	--
71.65	-59.1736	--
71.7	-58.7769	--
71.75	-58.8989	--
71.8	-58.8379	--
71.85	-58.5937	--
71.9	-58.4717	--
71.95	-58.136	--
72	-57.8613	--
72.05	-57.6477	--
72.1	-57.7698	--
72.15	-57.7698	--
72.2	-57.4646	--
72.25	-57.4036	--
72.3	-57.0679	--
72.35	-56.9153	--
72.4	-56.7322	--
72.45	-56.7627	--
72.5	-56.7932	--
72.55	-56.6406	--
72.6	-56.488	--
72.65	-56.2134	--
72.7	-56.0608	--
72.75	-55.7861	--
72.8	-55.8166	--
72.85	-55.9082	--
72.9	-55.8166	--
72.95	-55.5725	--
73	-55.4199	--
73.05	-55.2673	--
73.1	-54.9622	--
73.15	-54.718	--
73.2	-54.8096	--
73.25	-54.779	--
73.3	-54.8401	--
73.35	-54.6265	--
73.4	-54.5044	--
73.45	-54.3823	--
73.5	-54.0771	--
73.55	-53.833	--
73.6	-53.6499	--
73.65	-53.5889	--
73.7	-53.5278	--
73.75	-53.5583	--
73.8	-53.4973	--
73.85	-53.2532	--
73.9	-53.1921	--
73.95	-53.009	--
74	-52.7649	--
74.05	-52.6123	--
74.1	-52.3987	--
74.15	-52.2156	--
74.2	-52.1851	--
74.25	-52.2156	--
74.3	-52.2156	--
74.35	-52.063	--
74.4	-52.0019	--
74.45	-51.8188	--
74.5	-51.7273	--
74.55	-51.5137	--
74.6	-51.3611	--
74.65	-51.0864	--
74.7	-50.7812	--
74.75	-50.7202	--
74.8	-50.8118	--
74.85	-50.5981	--
74.9	-50.415	--
74.95	-50.1404	--
75	-49.7436	--
75.05	-49.7436	--
75.1	-49.7436	--
75.15	-49.5605	--
75.2	-49.0112	--
75.25	-48.8586	--
75.3	-48.9807	--
75.35	-48.645	--
75.4	-47.9431	--
75.45	-48.0957	--
75.5	-47.821	--
75.55	-47.2717	--
75.6	-47.3938	--
75.65	-46.9971	--
75.7	-46.2952	--
75.75	-46.3562	--
75.8	-45.8679	--
75.85	-45.1355	--
75.9	-45.0134	--
75.95	-44.4946	--
76	-43.5486	--
76.05	-43.2434	--
76.1	-42.2058	--
76.15	-41.1377	--
76.2	-40.1001	--
76.25	-38.147	--
76.3	-35.6445	--
76.35	-32.2266	--
76.4	-26.6113	--
76.45	-19.1345	--
76.5	-10.0098	--
76.55	0.671387	--
76.6	11.7493	--
76.65	21.9116	--
76.7	31.189	--
76.75	38.9099	--
76.8	43.6707	--
76.85	46.3562	--
76.9	46.5698	--
76.95	44.0063	--
77	38.6963	--
77.05	31.7078	--
77.1	23.3765	--
77.15	13.092	--
77.2	2.28882	--
77.25	-8.45337	--
77.3	-18.9514	--
77.35	-29.4189	--
77.4	-39.032	--
77.45	-47.5769	--
77.5	-55.0537	--
77.55	-62.0727	--
77.6	-67.749	--
77.65	-72.3572	--
77.7	-75.7141	--
77.75	-78.9184	--
77.8	-81.1767	--
77.85	-82.7637	--
77.9	-83.4351	--
77.95	-83.6487	--
78	-84.137	--
78.05	-84.0149	--
78.1	-83.5876	--
78.15	-82.8552	--
78.2	-82.0312	--
78.25	-81.6345	--
78.3	-80.8716	--
78.35	-80.0781	--
78.4	-79.071	--
78.45	-78.125	--
78.5	-77.5757	--
78.55	-76.9958	--
78.6	-76.2634	--
78.65	-75.4394	--
78.7	-74.585	--
78.75	-74.1577	--
78.8	-73.6999	--
78.85	-73.0896	--
78.9	-72.4182	--
78.95	-71.7468	--
79	-71.228	--
79.05	-70.9228	--
79.1	-70.4956	--
79.15	-70.0073	--
79.2	-69.458	--
79.25	-68.6951	--
79.3	-68.573	--
79.35	-68.3289	--
79.4	-67.8711	--
79.45	-67.4744	--
79.5	-66.9861	--
79.55	-66.6504	--
79.6	-66.4368	--
79.65	-66.1926	--
79.7	-65.8569	--
79.75	-65.4907	--
79.8	-65.155	--
79.85	-64.6057	--
79.9	-64.5142	--
79.95	-64.4836	--
80	-64.0564	--
80.05	-63.8123	--
80.1	-63.3545	--
80.15	-62.9578	--
80.2	-62.9578	--
80.25	-62.9272	--
80.3	-62.6526	--
80.35	-62.3474	--
80.4	-62.2253	--
80.45	-61.7981	--
80.5	-61.5234	--
80.55	-61.4929	--
80.6	-61.4929	--
80.65	-61.3708	--
80.7	-61.0962	--
80.75	-60.8215	--
80.8	-60.6079	--
80.85	-60.3332	--
80.9	-60.1501	--
80.95	-60.1501	--
81	-60.1807	--
81.05	-59.906	--
81.1	-59.8144	--
81.15	-59.5093	--
81.2	-59.2651	--
81.25	-59.1125	--
81.3	-59.082	--
81.35	-59.1431	--
81.4	-59.1431	--
81.45	-58.9905	--
81.5	-58.8989	--
81.55	-58.6548	--
81.6	-58.4412	--
81.65	-58.2275	--
81.7	-58.136	--
81.75	-58.1055	--
81.8	-58.1055	--
81.85	-58.0139	--
81.9	-57.8308	--
81.95	-57.7698	--
82	-57.5867	--
82.05	-57.4341	--
82.1	-57.2205	--
82.15	-57.0068	--
82.2	-56.9458	--
82.25	-56.9763	--
82.3	-57.0374	--
82.35	-56.9458	--
82.4	-56.7627	--
82.45	-56.6406	--
82.5	-56.6101	--
82.55	-56.3965	--
82.6	-56.1523	--
82.65	-55.9998	--
82.7	-55.9387	--
82.75	-55.7251	--
82.8	-55.6641	--
82.85	-55.6946	--
82.9	-55.6641	--
82.95	-55.6641	--
83	-55.5725	--
83.05	-55.3589	--
83.1	-55.2368	--
83.15	-55.1147	--
83.2	-54.8401	--
83.25	-54.9011	--
83.3	-55.0232	--
83.35	-54.8706	--
83.4	-54.8096	--
83.45	-54.2908	--
83.5	-54.4739	--
83.55	-54.5349	--
83.6	-54.3518	--
83.65	-53.9856	--
83.7	-54.1382	--
83.75	-54.0771	--
83.8	-53.6804	--
83.85	-53.8025	--
83.9	-53.772	--
83.95	-53.3752	--
84	-53.3447	--
84.05	-53.4058	--
84.1	-53.1311	--
84.15	-52.948	--
84.2	-52.9785	--
84.25	-52.6123	--
84.3	-52.6123	--
84.35	-52.5513	--
84.4	-52.1545	--
84.45	-52.2766	--
84.5	-52.0935	--
84.55	-51.6357	--
84.6	-51.8188	--
84.65	-51.6357	--
84.7	-51.1475	--
84.75	-51.239	--
84.8	-51.178	--
84.85	-50.7507	--
84.9	-50.7507	--
84.95	-50.6287	--
85	-50.3235	--
85.05	-50.1709	--
85.1	-50.2014	--
85.15	-49.9878	--
85.2	-49.469	--
85.25	-49.7436	--
85.3	-49.5605	--
85.35	-49.1638	--
85.4	-48.9502	--
85.45	-49.0723	--
85.5	-48.8281	--
85.55	-48.3093	--
85.6	-48.2178	--
85.65	-48.0957	--
85.7	-47.7905	--
85.75	-47.1802	--
85.8	-47.2107	--
85.85	-46.875	--
85.9	-46.5393	--
85.95	-45.8984	--
86	-45.6848	--
86.05	-45.3186	--
86.1	-44.7998	--
86.15	-43.9148	--
86.2	-43.3655	--
86.25	-42.7246	--
86.3	-41.687	--
86.35	-40.1001	--
86.4	-38.6352	--
86.45	-36.499	--
86.5	-32.8674	--
86.55	-27.4048	--
86.6	-20.2637	--
86.65	-11.261	--
86.7	-0.671387	--
86.75	10.376	--
86.8	21.1487	--
86.85	30.304	--
86.9	37.9639	--
86.95	43.3655	--
87	46.6309	--
87.05	47.0276	--
87.1	44.4641	--
87.15	39.7644	--
87.2	33.0505	--
87.25	24.6582	--
87.3	14.4958	--
87.35	3.72314	--
87.4	-7.14111	--
87.45	-18.0054	--
87.5	-28.1982	--
87.55	-38.1775	--
87.6	-47.2717	--
87.65	-55.0842	--
87.7	-61.7981	--
87.75	-67.3523	--
87.8	-72.3572	--
87.85	-76.355	--
87.9	-79.2236	--
87.95	-81.4514	--
88	-82.8857	--
88.05	-83.6792	--
88.1	-84.0759	--
88.15	-84.3811	--
88.2	-84.3811	--
88.25	-83.7707	--
88.3	-83.2214	--
88.35	-82.428	--
88.4	-81.543	--
88.45	-80.8105	--
88.5	-80.2612	--
88.55	-79.5288	--
88.6	-78.6743	--
88.65	-78.0029	--
88.7	-77.0264	--
88.75	-76.2024	--
88.8	-75.5005	--
88.85	-75.0732	--
88.9	-74.6155	--
88.95	-73.9746	--
89	-73.2727	--
89.05	-72.7844	--
89.1	-72.0825	--
89.15	-71.4416	--
89.2	-70.9534	--
89.25	-70.5566	--
89.3	-70.3735	--
89.35	-69.9768	--
89.4	-69.458	--
89.45	-69.1223	--
89.5	-68.634	--
89.55	-68.1763	--
89.6	-67.7185	--
89.65	-67.4133	--
89.7	-67.3218	--
89.75	-67.1081	--
89.8	-66.7725	--
89.85	-66.4062	--
89.9	-66.1621	--
89.95	-65.7654	--
90	-65.4297	--
90.05	-64.9414	--
90.1	-64.6362	--
90.15	-64.4226	--
90.2	-64.3005	--
90.25	-64.1479	--
90.3	-63.8428	--
90.35	-63.5681	--
90.4	-63.385	--
90.45	-63.2019	--
90.5	-62.8967	--
90.55	-62.561	--
90.6	-62.3474	--
90.65	-62.0117	--
90.7	-61.9202	--
90.75	-61.8896	--
90.8	-61.8591	--
90.85	-61.5234	--
90.9	-61.3403	--
90.95	-61.1572	--
91	-60.852	--
91.05	-60.791	--
91.1	-60.5774	--
91.15	-60.2417	--
91.2	-60.0891	--
91.25	-59.7839	--
91.3	-59.6313	--
91.35	-59.6313	--
91.4	-59.6924	--
91.45	-59.6008	--
91.5	-59.2957	--
91.55	-59.2346	--
91.6	-59.021	--
91.65	-58.7158	--
91.7	-58.8379	--
91.75	-58.7769	--
91.8	-58.6548	--
91.85	-58.2581	--
91.9	-58.2581	--
91.95	-58.2581	--
92	-58.1055	--
92.05	-57.7393	--
92.1	-57.8918	--
92.15	-57.7393	--
92.2	-57.4646	--
92.25	-57.5256	--
92.3	-57.4646	--
92.35	-57.0984	--
92.4	-57.1289	--
92.45	-57.1594	--
92.5	-56.8848	--
92.55	-56.8237	--
92.6	-56.7627	--
92.65	-56.5491	--
92.7	-56.5796	--
92.75	-56.488	--
92.8	-56.0608	--
92.85	-56.1829	--
92.9	-56.1829	--
92.95	-55.8166	--
93	-55.9082	--
93.05	-55.8777	--
93.1	-55.481	--
93.15	-55.603	--
93.2	-55.5725	--
93.25	-55.2673	--
93.3	-55.1758	--
93.35	-55.3284	--
93.4	-55.0232	--
93.45	-54.6875	--
93.5	-54.9316	--
93.55	-54.779	--
93.6	-54.4739	--
93.65	-54.2297	--
93.7	-54.3823	--
93.75	-54.1687	--
93.8	-53.7415	--
93.85	-53.772	--
93.9	-53.8025	--
93.95	-53.6194	--
94	-53.1006	--
94.05	-53.2837	--
94.1	-53.2532	--
94.15	-53.1616	--
94.2	-52.7954	--
94.25	-52.887	--
94.3	-52.887	--
94.35	-52.7344	--
94.4	-52.4292	--
94.45	-52.4597	--
94.5	-52.3987	--
94.55	-52.2461	--
94.6	-51.8494	--
94.65	-52.0019	--
94.7	-51.9409	--
94.75	-51.7578	--
94.8	-51.3916	--
94.85	-51.3916	--
94.9	-51.5137	--
94.95	-51.3306	--
95	-51.1475	--
95.05	-50.8423	--
95.1	-50.9644	--
95.15	-50.7812	--
95.2	-50.6592	--
95.25	-50.3235	--
95.3	-50.293	--
95.35	-50.3235	--
95.4	-50.0793	--
95.45	-49.6826	--
95.5	-49.408	--
95.55	-49.408	--
95.6	-49.2554	--
95.65	-48.9807	--
95.7	-48.4619	--
95.75	-48.3398	--
95.8	-48.2178	--
95.85	-48.0957	--
95.9	-47.699	--
95.95	-47.1802	--
96	-47.0276	--
96.05	-46.9971	--
96.1	-46.6614	--
96.15	-46.1121	--
96.2	-45.4712	--
96.25	-45.2576	--
96.3	-45.105	--
96.35	-44.4946	--
96.4	-43.8232	--
96.45	-43.0298	--
96.5	-42.0837	--
96.55	-41.4734	--
96.6	-40.2527	--
96.65	-38.5742	--
96.7	-36.1633	--
96.75	-32.5317	--
96.8	-27.4353	--
96.85	-20.3857	--
96.9	-11.2915	--
96.95	-0.732422	--
97	10.376	--
97.05	21.1792	--
97.1	30.426	--
97.15	37.8418	--
97.2	43.457	--
97.25	46.4783	--
97.3	46.875	--
97.35	44.7693	--
97.4	39.978	--
97.45	32.8979	--
97.5	24.292	--
97.55	14.4043	--
97.6	3.69263	--
97.65	-7.08008	--
97.7	-17.8223	--
97.75	-28.4729	--
97.8	-38.3606	--
97.85	-47.3328	--
97.9	-55.1453	--
97.95	-62.1033	--
98	-67.749	--
98.05	-72.3877	--
98.1	-76.2024	--
98.15	-79.2847	--
98.2	-81.604	--
98.25	-83.1299	--
98.3	-84.1675	--
98.35	-84.5947	--
98.4	-84.6558	--
98.45	-84.4726	--
98.5	-83.9233	--
98.55	-83.2825	--
98.6	-82.5195	--
98.65	-81.7566	--
98.7	-81.0242	--
98.75	-80.2307	--
98.8	-79.5898	--
98.85	-78.8269	--
98.9	-78.0945	--
98.95	-77.3926	--
99	-76.6601	--
99.05	-75.9277	--
99.1	-75.1953	--
99.15	-74.5544	--
99.2	-73.9441	--
99.25	-73.2727	--
99.3	-72.7234	--
99.35	-72.052	--
99.4	-71.5637	--
99.45	-71.1059	--
99.5	-70.7703	--
99.55	-70.4346	--
99.6	-70.0378	--
99.65	-69.7632	--
99.7	-69.3359	--
99.75	-68.8476	--
99.8	-68.5425	--
99.85	-68.0847	--
99.9	-67.5659	--
99.95	-67.2913	--
[truncated: 30,193 more rows]

## Sheet: Fig 1S2d
		p= 0.0004			p = 0.0002		p= 0.7
	241	286		40	10		80	87			Frequency (Hz)
	120	150		30	10		60	55
	102	130		60	20		55	50
	78	85		30	0		33	30
	65	72		50	20		55	55
	185	207					62	60
	170	200					45	47
	55	75					48	48
	65	85					30	32
	176	182					85	84
	88	92
	36	42
	50	52
	37	45
	38	39
	86	94
	54	60
