# Supplementary material for: Intrinsic mechanical sensitivity of mammalian auditory neurons as a contributor to sound-driven neural activity
Source: eLife. 2022 Mar 10;11:e74948. doi: 10.7554/eLife.74948 (PMC8942473; doi:10.7554/eLife.74948)
Supplement: Figure 1—figure supplement 3—source data 1. [file elife-74948-fig1-figsupp3-data1.xls]

## Sheet: Fig 1 S3 a
	Base
0	0.115472	0.045364	-1.13822	-1.1341	-4.02914	1.3403	-2.28057	-5.20861								Fig 1- fig supplement 3 (S3)
0.05	2.55688	0.35054	1.60836	1.61248	-4.6395	-2.32181	-5.33233	-1.5465								Displacement-clamp current recordings from eight-week-old adult SGNs.
0.1	2.55688	3.70747	-1.4434	-2.04962	-0.367036	-2.62699	-6.24786	-3.68273
0.15	1.33617	-1.48052	-2.6641	0.086605	-0.06186	-2.01664	-4.72198	-3.98791								Current traces elicited using varied displacements
0.2	2.86205	3.4023	-0.527872	4.96942	-2.80844	-0.490757	-3.1961	-0.325796
0.25	5.30346	-1.48052	-2.05375	1.00213	-0.672212	-5.06839	-1.67022	-3.68273
0.3	5.60864	1.57124	-2.96928	1.61248	2.07437	-3.23734	-5.02715	-0.325796
0.35	2.2517	2.48677	-0.833047	4.96942	-2.19809	-0.795933	-5.33233	-4.29308
0.4	0.420648	0.655716	0.692832	1.61248	-0.672212	-0.490757	-3.1961	1.20008
0.45	0.725823	3.4023	-2.05375	1.61248	2.68472	-3.23734	-2.58575	-3.68273
0.5	2.2517	0.960892	-1.13822	3.44354	-0.977387	-2.62699	0.160836	-1.24132
0.55	3.47241	0.655716	1.91353	2.22284	-1.28256	1.03512	2.60224	-3.07238
0.6	-0.800055	4.92818	-2.96928	-0.828922	0.548492	0.119595	0.466012	-0.630972
0.65	-2.02076	1.26607	-2.96928	0.391781	-0.672212	-2.32181	-0.754691	-1.5465
0.7	-1.71558	3.4023	-0.222696	0.086605	-3.11362	-1.40628	-0.754691	-2.15685
0.75	1.031	3.4023	-4.80033	-3.88068	-0.367036	1.95065	-0.754691	0.894907
0.8	0.725823	0.35054	-4.80033	-2.04962	2.07437	0.119595	1.07636	-3.68273
0.85	-1.41041	2.79195	-2.05375	1.00213	-3.11362	-2.32181	3.21259	2.42079
0.9	-2.02076	1.26607	-3.57963	-2.96515	-2.50327	-0.185581	0.771187	-1.5465
0.95	-0.800055	0.655716	-5.71586	-2.04962	0.853667	3.17135	-2.89092	1.20008
1	1.94653	4.623	-2.96928	1.30731	1.46402	1.03512	-1.67022	-0.630972
1.05	3.47241	0.35054	0.692832	0.696957	-2.19809	-1.10111	0.160836	-0.02062
1.1	-0.189704	0.35054	-2.6641	-0.523746	-0.06186	-0.185581	1.99189	1.81044
1.15	0.420648	5.23335	-1.74857	2.22284	3.60025	3.7817	-3.1961	-2.15685
1.2	1.64135	-0.870163	2.52389	4.35907	-1.58774	2.86618	-3.50127	2.42079
1.25	3.47241	-0.564987	0.387656	0.391781	-0.977387	-1.10111	-0.449516	-2.7672
1.3	-1.10523	2.48677	-0.527872	1.91766	-0.06186	0.119595	-0.14434	-0.936147
1.35	0.115472	-2.39604	0.998007	4.35907	1.15884	2.86618	-2.89092	-0.936147
1.4	4.08276	-1.48052	2.52389	2.83319	-1.89291	4.08688	-0.754691	-3.07238
1.45	-0.189704	0.960892	-1.4434	0.086605	-1.28256	-0.490757	1.38154	1.81044
1.5	-1.41041	-1.78569	-1.13822	1.30731	2.37955	-0.185581	-2.28057	-1.5465
1.55	2.86205	-0.259811	0.998007	2.83319	1.15884	0.42477	1.68671	0.589732
1.6	-0.800055	2.1816	-1.13822	-1.43927	-0.367036	2.561	1.38154	3.03114
1.65	1.031	-2.09087	-2.35893	-1.43927	0.243316	-0.795933	0.160836	-0.02062
1.7	1.33617	0.045364	-0.222696	0.696957	3.29507	-2.62699	4.12812	4.55702
1.75	0.115472	2.79195	1.91353	1.00213	0.243316	-0.490757	0.466012	2.72596
1.8	4.99828	-0.564987	-1.74857	-2.96515	-0.367036	1.64547	-0.14434	1.50526
1.85	0.115472	0.655716	-0.833047	-2.3548	0.853667	1.64547	1.38154	5.77772
1.9	3.16723	3.70747	2.52389	1.30731	3.60025	-1.10111	-1.05987	-0.02062
1.95	0.420648	-0.259811	3.74459	-0.828922	0.548492	-1.10111	2.29707	0.284556
2	0.420648	0.960892	0.387656	-4.18586	-0.977387	1.03512	-2.89092	1.50526
2.05	1.64135	3.09712	1.30318	-3.88068	1.15884	3.17135	-0.754691	-3.98791
2.1	-0.189704	-0.564987	4.35494	0.086605	3.29507	-0.185581	-0.449516	-0.936147
2.15	3.47241	0.655716	4.66012	-1.74445	0.243316	-2.01664	-2.28057	-0.936147
2.2	0.420648	4.31783	0.387656	-3.88068	-0.977387	-0.795933	1.99189	-4.29308
2.25	6.21899	-0.259811	1.30318	-1.74445	-0.367036	2.25583	-2.89092	-0.936147
2.3	0.115472	0.35054	4.35494	1.00213	2.9899	3.47653	0.466012	-2.15685
2.35	5.30346	4.31783	1.60836	-2.04962	-0.977387	-0.490757	-2.58575	-3.07238
2.4	0.115472	0.960892	-0.833047	-3.27033	-4.02914	-1.71146	-2.28057	1.50526
2.45	3.77758	0.35054	-0.222696	-1.74445	-1.89291	-1.10111	-0.14434	-1.85167
2.5	-0.189704	4.01265	3.13424	1.61248	0.243316	1.03512	-3.50127	-2.15685
2.55	0.420648	0.960892	1.91353	-0.828922	-2.19809	0.42477	0.466012	3.03114
2.6	-0.189704	0.35054	-1.13822	-3.27033	-4.6395	-1.40628	-4.11163	-0.936147
2.65	-1.10523	2.48677	0.08248	-2.3548	-3.41879	-2.93216	-4.72198	-1.5465
2.7	1.94653	3.09712	2.82906	1.00213	-1.89291	-2.32181	0.160836	3.33631
2.75	-1.41041	0.35054	3.13424	-0.218571	-1.28256	0.42477	-5.02715	-1.5465
2.8	2.86205	2.1816	0.692832	-2.65998	-4.6395	-1.71146	-1.67022	-1.5465
2.85	-2.63111	5.23335	1.60836	-2.65998	-4.94467	-2.01664	-1.36504	1.20008
2.9	0.420648	0.045364	3.74459	0.086605	-2.80844	-0.795933	-4.11163	-4.59826
2.95	0.115472	0.655716	4.96529	-0.828922	0.548492	1.3403	-1.05987	-2.7672
3	-2.63111	4.623	1.30318	-3.27033	-2.50327	-2.32181	-1.05987	0.284556
3.05	2.55688	1.57124	1.60836	-3.27033	-4.33432	-1.40628	-2.58575	-5.51378
3.1	-2.93629	0.045364	4.35494	-1.1341	-3.72397	2.25583	1.07636	-4.90343
3.15	-1.41041	2.48677	5.88082	1.61248	-1.58774	-1.10111	-1.05987	-0.02062
3.2	-1.41041	4.92818	1.91353	-2.96515	-0.977387	0.119595	-2.28057	-4.90343
3.25	-3.85181	1.26607	0.08248	-2.3548	-3.72397	1.95065	2.29707	-3.37755
3.3	1.64135	1.87642	0.692832	-1.74445	-3.41879	-1.40628	-0.754691	0.894907
3.35	-3.24146	5.23335	4.35494	1.61248	-2.50327	3.17135	-1.05987	-3.07238
3.4	-3.24146	2.79195	1.30318	1.00213	-0.977387	-0.490757	1.68671	-2.15685
3.45	-1.41041	1.26607	-2.05375	-2.04962	-0.367036	0.119595	-1.36504	3.03114
3.5	-4.46216	4.01265	-1.74857	-2.04962	-3.11362	1.95065	-2.58575	-1.24132
3.55	-2.02076	5.53853	-0.833047	0.086605	-2.80844	-2.01664	1.99189	-2.15685
3.6	-3.85181	1.57124	0.998007	2.83319	-2.50327	2.86618	-1.9754	-0.325796
3.65	-5.07252	0.960892	-2.35893	-0.523746	0.853667	-2.32181	-3.50127	-2.7672
3.7	0.420648	4.01265	-2.96928	-2.04962	-0.06186	2.25583	-1.36504	-3.68273
3.75	-4.46216	2.48677	-2.96928	-1.43927	-3.41879	-2.62699	-2.89092	-0.936147
3.8	-2.02076	0.35054	0.387656	1.91766	-1.28256	-0.490757	-4.11163	-0.325796
3.85	0.115472	2.1816	1.30318	2.22284	-1.58774	-2.62699	-1.67022	-2.46203
3.9	-2.63111	5.8437	-1.4434	-2.04962	1.46402	-0.490757	-0.449516	-1.5465
3.95	-1.10523	1.87642	-1.13822	-3.27033	-1.89291	0.42477	-4.11163	0.589732
4	-0.49488	0.35054	-0.222696	-2.04962	-2.19809	-0.185581	-2.58575	-3.07238
4.05	-2.63111	3.09712	2.82906	-1.43927	0.548492	2.86618	1.68671	-1.85167
4.1	0.420648	5.23335	1.91353	-0.828922	-1.58774	0.42477	-2.89092	2.72596
4.15	0.420648	3.09712	-1.4434	-5.40656	-2.19809	5.00241	-2.58575	-1.85167
4.2	-0.49488	1.87642	-0.222696	-4.18586	1.15884	1.03512	0.771187	-2.15685
4.25	2.55688	3.4023	0.692832	-3.88068	-0.672212	4.69723	-2.58575	0.894907
4.3	-0.189704	5.23335	2.52389	-0.828922	-1.28256	0.119595	-1.9754	0.894907
4.35	-0.800055	2.79195	4.04976	1.91766	4.2106	1.95065	-0.754691	-2.15685
4.4	4.08276	1.26607	0.08248	-1.1341	-0.06186	0.42477	-0.449516	0.284556
4.45	0.115472	4.31783	0.692832	-2.3548	2.68472	-2.01664	-1.9754	2.42079
4.5	0.420648	5.53853	2.52389	-1.43927	2.9899	1.03512	0.160836	-1.5465
4.55	4.38793	2.48677	2.52389	0.696957	-0.06186	-2.62699	2.60224	-2.15685
4.6	-0.189704	1.26607	4.04976	1.61248	4.2106	1.3403	-1.36504	0.284556
4.65	1.33617	2.79195	1.30318	-2.65998	-0.672212	-3.23734	-0.449516	-0.630972
4.7	4.69311	6.14888	-0.527872	-2.3548	2.37955	-2.01664	2.29707	-3.68273
4.75	0.420648	1.26607	-0.833047	-0.523746	-2.50327	0.119595	0.466012	-2.7672
4.8	1.031	0.35054	0.692832	-0.523746	0.548492	-2.62699	-2.28057	-0.936147
4.85	4.69311	1.57124	3.13424	-2.65998	-2.19809	1.3403	-0.14434	-3.98791
4.9	-0.49488	4.623	1.91353	-1.43927	-0.977387	-1.40628	1.68671	-3.98791
4.95	-0.49488	2.48677	-1.4434	0.086605	-1.58774	-1.10111	-2.58575	-1.24132
5	3.16723	1.26607	-2.05375	-3.27033	-1.28256	2.86618	-3.1961	-1.24132
5.05	-1.41041	2.48677	-0.833047	-0.523746	0.853667	-0.490757	0.160836	-4.59826
5.1	-1.10523	5.23335	0.08248	-0.218571	-1.58774	1.03512	-2.89092	-2.7672
5.15	3.16723	4.92818	2.52389	-1.74445	2.07437	1.03512	-3.50127	0.894907
5.2	-2.32593	2.1816	-0.527872	2.83319	-0.977387	-0.795933	-4.11163	-2.46203
5.25	-2.32593	1.57124	-2.35893	-1.43927	5.12613	2.25583	-0.754691	-3.68273
5.3	1.94653	4.31783	-0.527872	1.30731	-0.672212	-2.62699	-3.80645	-2.46203
5.35	-1.71558	4.92818	3.43941	1.91766	3.29507	-2.01664	-5.02715	-0.02062
5.4	-2.93629	1.26607	0.692832	-0.523746	-0.06186	1.64547	-4.11163	-3.98791
5.45	1.94653	-0.259811	-2.05375	4.05389	1.7692	-2.32181	-2.89092	-4.29308
5.5	-1.10523	0.045364	-0.527872	-1.43927	1.46402	-0.795933	-6.24786	-2.15685
5.55	-2.63111	4.31783	2.52389	2.83319	-1.28256	2.25583	-5.94268	-0.936147
5.6	0.420648	3.70747	-2.96928	-3.27033	2.37955	-2.62699	-4.72198	-5.20861
5.65	1.33617	0.35054	-0.833047	-0.828922	-1.89291	1.03512	-4.11163	-4.90343
5.7	-2.02076	1.26607	3.43941	-2.96515	-0.06186	1.3403	-8.38409	-3.07238
5.75	0.420648	2.1816	-1.13822	-2.96515	-2.80844	-1.40628	-6.24786	0.589732
5.8	1.94653	6.14888	0.692832	-2.04962	-3.11362	1.64547	-2.28057	-4.90343
5.85	-0.49488	4.31783	-0.527872	-4.49103	1.15884	-0.795933	-4.11163	-3.68273
5.9	0.420648	2.1816	-2.35893	0.696957	-3.41879	-2.01664	-6.24786	-2.7672
5.95	4.69311	3.09712	3.43941	-2.04962	-0.977387	1.03512	-5.33233	0.284556
6	0.420648	4.92818	-1.74857	1.91766	-3.11362	-2.01664	-1.9754	-3.37755
6.05	-0.189704	7.67476	0.692832	-2.04962	-3.41879	-2.93216	-4.72198	-3.98791
6.1	1.94653	4.31783	-1.74857	0.086605	1.7692	1.03512	-6.24786	-2.15685
6.15	2.2517	1.57124	-2.35893	-1.1341	-2.80844	-2.93216	-5.33233	-0.02062
6.2	-0.49488	2.1816	1.91353	-0.828922	0.548492	-3.84769	-2.89092	-3.68273
6.25	0.115472	2.48677	-1.74857	0.391781	2.37955	1.3403	-4.11163	-5.81896
6.3	3.47241	3.70747	2.82906	-1.74445	1.46402	-3.54251	-6.85821	-5.20861
6.35	-0.189704	0.35054	-1.74857	1.30731	6.04166	-3.23734	-4.4168	-1.5465
6.4	-0.800055	-1.48052	0.387656	-3.5755	1.46402	1.03512	-2.28057	-2.15685
6.45	2.86205	-2.39604	-1.13822	-2.96515	1.15884	-3.84769	-0.14434	-5.81896
6.5	2.86205	-1.78569	-2.05375	-1.74445	5.73648	-3.23734	-3.80645	-4.90343
6.55	-0.189704	0.655716	2.21871	-3.27033	0.243316	2.86618	-3.50127	-2.46203
6.6	0.420648	2.79195	-0.833047	1.61248	1.15884	-2.32181	-1.36504	-0.02062
6.65	3.77758	0.35054	4.35494	-2.04962	2.9899	-1.10111	2.29707	-2.7672
6.7	1.031	0.655716	-0.527872	-1.74445	-0.367036	2.561	-1.67022	-3.37755
6.75	0.725823	2.1816	3.74459	2.22284	1.7692	-0.185581	-2.58575	-2.7672
6.8	1.031	4.01265	2.52389	-1.43927	-0.367036	-1.40628	-1.05987	1.20008
6.85	1.94653	5.53853	0.08248	1.61248	-1.58774	2.86618	1.68671	0.894907
6.9	-1.71558	1.57124	4.96529	0.696957	1.15884	0.729946	0.160836	-3.37755
6.95	-1.10523	0.045364	-1.13822	-0.828922	-0.672212	-0.185581	-2.89092	-1.5465
7	2.55688	1.87642	1.30318	3.44354	-1.28256	1.64547	-1.05987	-0.325796
7.05	1.031	3.09712	0.998007	-0.218571	2.9899	0.42477	1.38154	2.42079
7.1	-2.02076	-1.17534	-1.13822	-1.1341	-1.28256	-0.490757	2.90742	0.284556
7.15	-0.800055	-1.48052	3.74459	3.13836	-0.367036	2.25583	1.38154	-1.5465
7.2	2.55688	2.1816	-1.4434	-2.04962	4.82095	3.17135	-0.14434	-0.02062
7.25	-1.71558	-1.78569	-1.4434	0.086605	-1.28256	0.119595	1.99189	1.20008
7.3	-3.54664	-1.48052	1.30318	1.00213	-0.672212	1.3403	3.51777	3.03114
7.35	-1.41041	2.1816	-3.27445	-2.96515	3.60025	4.39206	5.04365	0.284556
7.4	1.94653	-2.70122	0.387656	0.086605	-2.19809	0.119595	0.466012	-1.85167
7.45	-1.10523	0.35054	0.692832	0.391781	-0.977387	0.42477	0.466012	-0.936147
7.5	-1.71558	0.045364	-1.74857	-2.65998	1.7692	3.7817	1.38154	0.589732
7.55	1.33617	-2.39604	1.30318	-1.1341	-1.58774	0.42477	2.60224	3.33631
7.6	3.77758	2.79195	0.998007	-0.828922	-1.89291	-0.490757	3.51777	0.284556
7.65	-0.189704	-3.00639	-0.222696	-2.65998	0.548492	1.95065	-0.449516	-0.630972
7.7	-0.189704	0.655716	1.91353	-0.218571	-4.02914	1.03512	-0.754691	0.589732
7.75	0.115472	-0.564987	0.387656	-0.523746	-2.80844	-0.490757	-1.05987	2.72596
7.8	3.47241	-0.870163	-1.4434	-2.3548	1.7692	1.03512	1.38154	-0.325796
7.85	1.64135	1.57124	2.82906	1.30731	-2.19809	3.17135	3.21259	-1.24132
7.9	-1.10523	-2.09087	0.08248	0.086605	-1.89291	-1.40628	-0.754691	1.20008
7.95	-0.49488	2.1816	-1.13822	-1.74445	2.9899	-0.185581	-2.28057	0.284556
8	2.55688	-3.00639	1.91353	1.00213	-3.11362	3.17135	-1.67022	-2.46203
8.05	0.725823	0.960892	0.08248	0.391781	-3.11362	-0.185581	-0.14434	0.589732
8.1	-2.02076	-1.78569	-1.4434	-1.74445	0.548492	-2.01664	2.90742	-0.936147
8.15	-1.71558	0.655716	0.998007	-0.218571	-2.50327	-1.10111	0.466012	-2.15685
8.2	1.33617	0.655716	-1.74857	-0.523746	-2.50327	1.95065	-1.36504	2.42079
8.25	2.86205	0.35054	-1.74857	-1.43927	0.853667	-2.32181	-1.36504	-2.46203
8.3	-1.71558	2.79195	0.387656	0.696957	-2.50327	-2.32181	-0.449516	-0.325796
8.35	-2.32593	0.655716	-2.96928	-0.218571	-4.02914	-0.185581	1.99189	0.589732
8.4	0.420648	4.01265	-3.88481	-2.65998	-0.672212	1.03512	2.60224	-1.85167
8.45	3.16723	-0.259811	-0.527872	0.696957	0.243316	-2.62699	1.07636	2.42079
8.5	-0.49488	1.87642	0.08248	2.22284	-2.80844	-2.62699	-0.754691	-0.630972
8.55	-1.71558	1.87642	-1.13822	-1.43927	-0.672212	1.95065	-0.449516	4.55702
8.6	-1.41041	1.26607	1.91353	1.30731	1.46402	0.119595	0.160836	-1.5465
8.65	1.33617	4.623	2.82906	2.22284	-1.58774	-1.40628	1.68671	1.50526
8.7	1.94653	-0.259811	0.692832	-1.74445	-0.977387	-0.490757	3.51777	-0.325796
8.75	-1.71558	1.57124	1.30318	0.086605	3.29507	1.03512	0.466012	-0.325796
8.8	-1.10523	1.26607	3.74459	3.13836	-0.672212	-2.32181	-1.67022	-0.630972
8.85	-0.189704	-2.09087	-0.527872	-1.1341	-0.977387	-2.01664	-1.36504	-1.24132
8.9	3.16723	1.87642	-0.527872	-1.74445	1.7692	-0.490757	-1.36504	1.50526
8.95	1.64135	-1.78569	3.74459	2.22284	0.548492	1.3403	1.07636	-0.936147
9	-1.41041	-1.78569	-2.05375	-1.43927	-1.58774	-2.32181	2.60224	3.33631
9.05	-1.10523	0.960892	-3.27445	-2.3548	-0.977387	-0.795933	0.466012	-0.630972
9.1	-1.41041	-3.92192	0.692832	0.696957	1.7692	1.95065	-2.28057	3.64149
9.15	-0.49488	-0.259811	-1.74857	0.696957	-2.50327	3.7817	-2.58575	-1.24132
9.2	-2.02076	0.960892	-4.80033	-2.96515	-3.11362	-0.795933	-0.754691	2.11561
9.25	-4.15699	-1.78569	-2.96928	-1.43927	0.243316	0.119595	-1.05987	-1.24132
9.3	-3.85181	2.1816	-1.13822	4.35907	0.243316	0.42477	1.68671	-0.630972
9.35	-2.63111	0.960892	-4.80033	0.391781	-2.80844	1.95065	-2.58575	0.894907
9.4	1.031	0.35054	-3.88481	1.00213	-0.06186	-3.23734	-3.1961	-1.5465
9.45	-1.41041	3.70747	0.692832	4.66424	2.68472	-3.84769	-3.1961	2.42079
9.5	-2.63111	0.045364	-2.05375	2.52801	-0.367036	-2.01664	0.771187	-1.5465
9.55	-0.800055	-0.564987	-1.74857	1.30731	-0.367036	0.729946	-2.28057	1.20008
9.6	1.64135	3.09712	1.60836	2.52801	1.7692	-3.84769	-3.1961	0.589732
9.65	-0.800055	-1.48052	2.21871	3.74871	4.2106	-3.54251	-1.36504	-1.5465
9.7	-1.41041	-3.00639	-1.13822	0.086605	-0.06186	-2.01664	-0.449516	3.03114
9.75	1.33617	0.960892	-0.833047	0.086605	0.853667	1.3403	-2.58575	-0.936147
9.8	-2.02076	-3.31157	4.35494	2.22284	2.9899	0.729946	-0.14434	0.589732
9.85	-2.32593	-4.53227	0.08248	1.00213	3.29507	-2.32181	0.466012	1.20008
9.9	1.94653	-1.48052	-0.833047	-2.04962	0.548492	-1.10111	-1.36504	-0.936147
9.95	-1.10523	-5.75298	1.91353	-0.218571	0.548492	1.03512	2.60224	3.03114
10	-0.49488	-5.75298	2.82906	2.52801	2.9899	1.3403	0.160836	-0.936147
10.05	2.2517	-1.17534	-1.74857	-1.43927	0.243316	-1.10111	0.160836	-0.02062
10.1	-0.189704	-5.14262	-2.35893	-2.96515	-0.06186	-0.490757	3.51777	2.72596
10.15	4.38793	-3.92192	0.387656	-0.218571	0.853667	0.729946	-0.754691	-1.5465
10.2	-0.189704	0.655716	-0.833047	1.91766	3.90543	2.86618	2.60224	1.20008
10.25	1.94653	-2.70122	-3.88481	-1.74445	0.548492	1.64547	0.771187	0.894907
10.3	2.2517	-2.09087	-2.35893	-1.74445	-1.58774	0.729946	0.160836	-2.7672
10.35	1.33617	0.960892	-0.527872	1.61248	-0.06186	1.03512	2.60224	1.50526
10.4	4.08276	-2.39604	-1.74857	3.44354	4.51578	1.03512	0.160836	-3.07238
10.45	0.725823	-2.39604	-2.6641	-0.218571	1.46402	3.47653	2.90742	-2.7672
10.5	5.91381	0.655716	-2.6641	-0.828922	0.548492	1.3403	-1.36504	0.589732
10.55	1.031	-2.70122	1.60836	2.22284	1.46402	-1.71146	-0.754691	-4.29308
10.6	6.52416	-4.2271	-2.6641	1.30731	4.82095	-1.10111	1.38154	-1.24132
10.65	-0.800055	-0.870163	-2.6641	-2.65998	2.68472	0.729946	-0.754691	0.894907
10.7	3.16723	-1.48052	-2.6641	-3.27033	-0.06186	1.95065	4.4333	-2.46203
10.75	0.420648	-3.61674	0.692832	-1.43927	1.15884	-1.71146	-0.14434	-0.02062
10.8	1.33617	-0.564987	-3.27445	-1.43927	2.68472	-2.62699	2.60224	0.284556
10.85	-0.49488	0.960892	-4.18998	-5.71174	2.68472	-2.62699	1.68671	-2.46203
10.9	-1.10523	-1.78569	-3.88481	-4.49103	-1.28256	-0.185581	1.07636	0.589732
10.95	2.2517	0.35054	0.08248	-1.74445	-0.06186	0.119595	4.73847	-0.02062
11	-0.800055	3.09712	-2.96928	-0.218571	2.37955	-2.93216	-0.449516	-1.5465
11.05	4.69311	-0.870163	-3.57963	-3.88068	3.90543	-3.84769	1.68671	1.20008
11.1	-0.49488	0.045364	-2.35893	-2.3548	1.46402	-2.62699	2.60224	0.284556
11.15	2.2517	3.4023	0.692832	-0.523746	-0.367036	1.95065	-1.9754	-2.7672
11.2	0.725823	0.045364	-1.4434	1.30731	1.46402	-1.40628	1.07636	2.42079
11.25	0.420648	-1.48052	-3.27445	-2.04962	3.90543	-1.71146	0.466012	-0.630972
11.3	3.77758	0.045364	-2.96928	-2.04962	2.37955	0.119595	-0.754691	-2.7672
11.35	0.115472	0.35054	-1.13822	-1.74445	-0.977387	0.42477	1.68671	-0.02062
11.4	4.08276	-3.92192	-0.222696	1.00213	-1.58774	-1.40628	-1.67022	-3.98791
11.45	1.031	-3.00639	-3.27445	-1.1341	-0.06186	0.729946	-1.36504	-4.59826
11.5	0.420648	0.655716	-2.96928	-3.5755	0.853667	0.42477	4.12812	-0.630972
11.55	4.08276	-3.00639	-2.05375	-3.27033	-2.50327	-2.62699	0.160836	-3.07238
11.6	0.115472	-2.70122	0.387656	-0.828922	-2.50327	1.3403	-0.14434	-4.90343
11.65	1.94653	-0.259811	-2.35893	0.696957	-2.19809	-2.01664	2.60224	-1.85167
11.7	-0.189704	0.655716	-3.57963	-2.65998	-0.672212	-1.10111	-0.754691	-2.46203
11.75	-2.63111	-0.259811	-2.35893	-3.27033	1.15884	1.3403	-1.05987	-2.15685
11.8	3.77758	0.35054	0.692832	-2.04962	-1.58774	-2.01664	2.60224	-0.325796
11.85	-1.10523	4.623	-0.222696	1.30731	-2.80844	2.25583	-1.05987	-0.02062
11.9	0.725823	0.35054	-3.27445	0.391781	-1.89291	-3.54251	-1.9754	-2.46203
11.95	3.77758	-1.17534	-2.96928	-2.65998	0.243316	-0.795933	0.771187	0.284556
12	1.33617	0.655716	-2.35893	-1.1341	0.853667	-2.62699	-2.58575	0.894907
12.05	3.47241	1.26607	1.30318	-0.218571	-1.58774	-2.32181	-3.80645	-2.15685
12.1	3.16723	-2.70122	-1.4434	3.13836	-1.89291	-2.62699	-0.14434	-0.02062
12.15	1.94653	-1.17534	-2.96928	0.696957	0.243316	-4.15287	-2.58575	1.81044
12.2	4.69311	0.655716	-2.6641	-2.3548	2.9899	-1.40628	-5.6375	-2.15685
12.25	1.94653	0.35054	-0.527872	-1.74445	-0.367036	-2.93216	-2.58575	-2.46203
12.3	1.33617	-3.00639	1.60836	-0.218571	-1.28256	1.03512	-1.67022	2.42079
12.35	5.60864	-1.48052	0.387656	0.696957	0.243316	-3.54251	-4.4168	-2.15685
12.4	0.725823	1.26607	-2.96928	-2.3548	0.243316	0.42477	-1.9754	-1.85167
12.45	1.64135	-0.564987	-1.4434	-4.18586	-1.89291	-4.45804	0.771187	1.50526
12.5	4.69311	-3.00639	0.998007	-3.5755	-0.672212	-0.490757	-4.11163	-0.936147
12.55	-0.189704	-2.39604	2.82906	-1.74445	0.243316	-5.37357	-2.58575	-1.5465
12.6	0.115472	0.655716	0.998007	-0.523746	-2.50327	-2.93216	1.07636	0.589732
12.65	2.86205	-1.17534	-1.4434	-2.04962	0.853667	-2.62699	-4.11163	1.81044
12.7	-0.49488	-3.00639	1.91353	-3.88068	-1.28256	-3.84769	-4.11163	-0.630972
12.75	0.725823	-2.70122	1.91353	-2.04962	-2.19809	-0.795933	-0.449516	0.284556
12.8	1.94653	1.26607	3.43941	-2.04962	2.37955	-4.15287	-1.9754	4.55702
12.85	-1.71558	-1.17534	2.82906	1.30731	-2.50327	1.3403	-4.4168	-0.325796
12.9	0.420648	-3.00639	-1.13822	-2.3548	1.7692	-3.54251	-1.67022	-0.02062
12.95	1.031	-2.09087	-1.13822	-3.88068	-1.89291	-1.40628	1.99189	2.42079
13	-1.41041	0.960892	0.08248	-2.65998	-0.672212	0.119595	-2.58575	3.33631
13.05	-0.49488	-0.564987	0.387656	0.391781	-1.89291	-2.62699	-1.36504	-0.936147
13.1	0.420648	-3.92192	1.91353	-2.04962	-2.50327	2.561	1.68671	-0.630972
13.15	-1.71558	-3.31157	-0.527872	-3.27033	-0.06186	-2.01664	-0.754691	4.55702
13.2	-0.49488	-0.259811	-2.35893	0.391781	-4.33432	-0.185581	-1.9754	0.589732
13.25	0.420648	-0.259811	-3.27445	-0.828922	-0.367036	1.95065	-0.449516	-0.936147
13.3	-2.32593	-3.92192	-2.35893	-2.3548	-3.72397	-1.71146	2.29707	0.894907
13.35	0.115472	-3.00639	0.692832	0.391781	1.7692	0.729946	-2.28057	2.42079
13.4	0.725823	-1.48052	0.998007	-0.523746	-4.33432	-2.01664	-0.754691	-0.936147
13.45	-1.71558	1.26607	-2.05375	-3.88068	-0.977387	-2.32181	4.12812	-0.02062
13.5	1.031	-1.17534	-2.96928	1.00213	-3.41879	1.3403	1.07636	1.50526
13.55	3.47241	-1.78569	-1.74857	-2.65998	-0.977387	-4.15287	-0.754691	1.50526
13.6	-1.10523	0.655716	0.998007	-2.3548	-3.41879	-2.62699	0.771187	-2.15685
13.65	1.031	3.70747	0.998007	-2.96515	-2.80844	-0.490757	3.82294	-0.936147
13.7	3.16723	3.4023	-1.4434	-4.49103	-1.89291	-2.93216	-0.14434	1.20008
13.75	-1.10523	-0.564987	-1.4434	-0.523746	-2.50327	-0.490757	0.160836	-0.630972
13.8	-0.800055	0.655716	2.52389	-5.10138	1.46402	-2.62699	2.90742	-2.7672
13.85	2.86205	2.79195	0.387656	0.391781	-1.10523	-3.84769	3.82294	-2.15685
13.9	-1.10523	5.23335	-1.4434	-3.88068	-1.41041	0.119595	-0.449516	0.589732
13.95	-0.800055	1.87642	2.52389	-0.828922	-0.49488	-4.15287	-0.14434	-2.15685
14	1.94653	0.045364	0.692832	-2.3548	-2.02076	-3.23734	2.90742	-2.46203
14.05	-0.189704	1.87642	0.08248	-1.10523	-4.15699	1.3403	4.4333	-0.02062
14.1	-2.32593	4.31783	3.13424	-1.41041	-3.85181	-3.23734	1.07636	4.86219
14.15	0.420648	5.23335	-0.222696	-0.49488	-2.63111	-1.71146	1.38154	0.284556
14.2	1.64135	1.57124	0.08248	-2.02076	1.031	1.95065	2.60224	-1.24132
14.25	-2.93629	0.045364	2.21871	-4.15699	-1.41041	-2.62699	2.90742	1.81044
14.3	-1.10523	0.655716	-2.35893	-3.85181	-2.63111	-0.795933	0.160836	4.25184
14.35	2.86205	3.70747	1.91353	-2.63111	-0.800055	0.119595	0.771187	0.589732
14.4	-2.32593	4.31783	-1.74857	1.031	1.64135	-3.23734	2.60224	-0.630972
14.45	-3.24146	0.960892	-0.527872	-1.41041	-0.800055	-2.62699	2.60224	-0.02062
14.5	-0.49488	-0.564987	-0.222696	-2.63111	-1.41041	-1.10111	-0.754691	3.03114
14.55	-2.32593	0.960892	-1.74857	-0.800055	1.33617	-3.54251	0.160836	0.284556
14.6	-3.24146	2.79195	2.82906	1.64135	-2.02076	-2.62699	2.90742	-1.85167
14.65	-1.71558	4.31783	-1.74857	-0.800055	-2.32593	-2.32181	5.04365	-0.325796
14.7	0.725823	1.87642	4.35494	-1.41041	1.94653	-4.15287	1.68671	1.50526
14.75	-2.02076	-0.564987	-0.833047	1.33617	-1.10523	-1.71146	1.38154	0.589732
14.8	-1.41041	-0.870163	0.998007	-2.02076	-0.49488	-0.795933	3.21259	-2.15685
14.85	1.64135	1.26607	0.692832	-2.32593	2.2517	-2.62699	4.73847	-0.630972
14.9	0.420648	4.01265	-0.222696	1.94653	-0.189704	0.729946	2.29707	0.284556
14.95	-2.63111	4.31783	-1.10523	-1.10523	4.38793	0.42477	1.68671	2.72596
15	0.115472	0.960892	-1.41041	-0.49488	-0.189704	-3.23734	4.12812	-0.630972
15.05	3.16723	0.655716	-0.49488	2.2517	1.94653	0.729946	7.48505	-2.46203
15.1	-0.49488	-1.10523	-2.02076	-0.189704	2.2517	0.42477	5.654	-0.630972
15.15	-1.41041	-1.41041	-4.15699	4.38793	1.33617	-2.01664	4.4333	3.33631
15.2	-1.10523	-0.49488	-3.85181	-0.189704	4.08276	-3.23734	1.031	1.50526
15.25	-1.41041	-2.02076	-2.63111	1.94653	0.725823	2.86618	6.56953	-1.24132
15.3	-0.49488	-4.15699	1.031	2.2517	5.91381	-2.32181	6.8747	-1.5465
15.35	-2.02076	-3.85181	-1.41041	1.33617	1.031	-1.10111	2.90742	-0.630972
15.4	-4.15699	-2.63111	-2.63111	4.08276	6.52416	2.561	2.60224	0.589732
15.45	-3.85181	1.031	-0.800055	0.725823	-0.800055	-0.185581	2.90742	-3.07238
15.5	-2.63111	-1.41041	1.64135	5.91381	3.16723	-1.40628	6.56953	-0.02062
15.55	1.031	-2.63111	-0.800055	1.031	0.420648	2.86618	3.21259	-2.46203
15.6	-1.41041	-0.800055	-1.41041	6.52416	1.33617	0.729946	-0.449516	0.284556
15.65	-2.63111	1.64135	1.33617	-0.800055	-0.49488	-0.185581	-1.36504	0.894907
15.7	-0.800055	-0.800055	-2.02076	3.16723	-1.10523	1.64547	-1.67022	-2.15685
15.75	1.64135	-1.41041	-2.32593	0.420648	2.2517	0.42477	-1.05987	-0.02062
15.8	-0.800055	1.33617	1.94653	1.33617	-0.800055	-0.490757	-7.77374	1.81044
15.85	-1.41041	-2.02076	-1.10523	-0.49488	4.69311	2.25583	-14.4876	-2.15685
15.9	1.33617	-2.32593	-0.49488	-1.10523	-0.49488	3.17135	1.031	-2.46203
15.95	-2.02076	1.94653	2.2517	2.2517	2.2517	0.119595	-2.28057	2.42079
16	-2.32593	-1.10523	-0.189704	-0.800055	0.725823	1.3403	-0.754691	-2.15685
16.05	1.94653	-0.49488	4.38793	4.69311	0.420648	4.39206	4.12812	-1.85167
16.1	-1.10523	2.2517	-0.189704	-0.49488	3.77758	0.119595	1.07636	1.50526
16.15	-0.49488	-0.189704	1.94653	2.2517	0.115472	0.42477	-0.754691	-0.936147
16.2	2.2517	4.38793	2.2517	0.725823	4.08276	3.7817	0.771187	-1.5465
16.25	-0.189704	-0.189704	1.33617	0.420648	1.031	0.42477	3.82294	0.589732
16.3	4.38793	1.94653	4.08276	3.77758	0.420648	-0.490757	-0.14434	1.81044
16.35	-0.189704	2.2517	0.725823	0.115472	4.08276	1.95065	0.160836	-0.630972
16.4	1.94653	1.33617	5.91381	4.08276	0.115472	1.03512	2.90742	0.284556
16.45	2.2517	4.08276	1.031	1.031	1.94653	-0.490757	3.82294	4.55702
16.5	1.33617	0.725823	6.52416	0.420648	-1.10523	1.03512	-0.449516	-0.325796
16.55	4.08276	5.91381	-0.800055	4.08276	-1.41041	3.17135	-0.14434	-0.02062
16.6	0.725823	1.031	3.16723	0.115472	-0.49488	-1.40628	2.90742	2.42079
16.65	5.91381	6.52416	0.420648	1.94653	-2.02076	-0.185581	4.4333	3.33631
16.7	1.031	-0.800055	1.33617	-1.10523	-4.15699	3.17135	1.07636	-0.936147
16.75	6.52416	3.16723	-0.49488	-1.41041	-3.85181	-0.185581	1.38154	-0.02062
16.8	-0.800055	0.420648	-1.10523	-0.49488	-2.63111	-2.01664	2.60224	-2.46203
16.85	3.16723	1.33617	2.2517	-2.02076	1.031	-1.10111	2.90742	0.284556
16.9	0.420648	-0.49488	-0.800055	-4.15699	-1.41041	1.95065	0.160836	0.894907
16.95	1.33617	-1.10523	4.69311	-3.85181	-2.63111	-2.32181	0.771187	-2.15685
17	-0.49488	2.2517	-0.49488	-2.63111	-0.800055	-2.32181	2.60224	-0.02062
17.05	-1.10523	-0.800055	2.2517	1.031	1.64135	-0.185581	2.60224	1.81044
17.1	2.2517	4.69311	0.725823	-1.41041	-0.800055	1.03512	-0.754691	-2.15685
17.15	-0.800055	-0.49488	0.420648	-2.63111	-1.41041	-2.62699	0.160836	-2.46203
17.2	4.69311	2.2517	3.77758	-0.800055	1.33617	-2.62699	2.90742	2.42079
17.25	-0.49488	0.725823	0.115472	1.64135	-2.02076	1.95065	5.04365	-2.15685
17.3	2.2517	0.420648	4.08276	-0.800055	-2.32593	0.119595	1.68671	-1.85167
17.35	0.725823	3.77758	1.031	-1.41041	1.94653	-1.40628	1.38154	1.50526
17.4	0.420648	0.115472	0.420648	1.33617	-1.10523	-0.490757	3.21259	-0.936147
17.45	3.77758	4.08276	4.08276	-2.02076	-0.49488	1.03512	4.73847	-1.5465
17.5	0.115472	1.031	0.115472	-2.32593	2.2517	-2.32181	2.29707	0.589732
17.55	4.08276	0.420648	1.94653	1.94653	-0.189704	-2.01664	1.68671	1.81044
17.6	1.031	4.08276	-1.10523	-1.10523	4.38793	-0.490757	4.12812	-0.630972
17.65	0.420648	0.115472	-1.41041	-0.49488	-0.189704	1.3403	7.48505	0.284556
17.7	4.08276	1.94653	-0.49488	2.2517	1.94653	-2.32181	-2.28057	4.55702
17.75	0.115472	-1.10523	-2.02076	-0.189704	2.2517	-0.795933	-0.754691	-0.325796
17.8	1.94653	-1.41041	-4.15699	4.38793	1.33617	1.95065	4.12812	-0.02062
17.85	-1.10523	-0.49488	-3.85181	-0.189704	4.08276	3.7817	1.07636	2.42079
17.9	-1.41041	-2.02076	-2.63111	1.94653	0.725823	-0.795933	-0.754691	3.33631
17.95	-0.49488	-4.15699	1.031	2.2517	5.91381	0.119595	0.771187	-0.936147
18	-2.02076	-3.85181	-1.41041	1.33617	1.031	0.42477	3.82294	-0.02062
18.05	-4.15699	-2.63111	-2.63111	4.08276	6.52416	1.95065	-0.14434	-2.46203
18.1	-3.85181	1.031	-0.800055	0.725823	-0.800055	-3.23734	0.160836	0.284556
18.15	-2.63111	-1.41041	1.64135	5.91381	3.16723	-3.84769	2.90742	0.894907
18.2	1.031	-2.63111	-0.800055	1.031	0.420648	-2.01664	3.82294	-2.15685
18.25	-1.41041	-0.800055	-1.41041	6.52416	1.33617	0.729946	-0.449516	-0.02062
18.3	-2.63111	1.64135	1.33617	-0.800055	-0.49488	-3.84769	-0.14434	1.81044
18.35	-0.800055	-0.800055	-2.02076	3.16723	-1.10523	-3.54251	2.90742	-2.15685
18.4	1.64135	-1.41041	-2.32593	0.420648	2.2517	-2.01664	4.4333	-2.46203
18.45	-0.800055	1.33617	1.94653	1.33617	-0.800055	1.3403	1.07636	2.42079
18.5	-1.41041	-2.02076	-1.10523	-0.49488	4.69311	0.729946	1.38154	-2.15685
18.55	1.33617	-2.32593	-0.49488	-1.10523	-0.49488	-2.32181	2.60224	-1.85167
18.6	-2.02076	1.94653	2.2517	2.2517	2.2517	-1.10111	2.90742	1.50526
18.65	-2.32593	-1.10523	-0.189704	-0.800055	0.725823	1.03512	0.160836	-0.936147
18.7	1.94653	-0.49488	4.38793	4.69311	0.420648	1.3403	0.771187	-1.5465
18.75	-1.10523	2.2517	-0.189704	-0.49488	3.77758	-1.10111	2.60224	0.589732
18.8	-0.49488	-0.189704	1.94653	2.2517	0.115472	-0.490757	2.60224	1.81044
18.85	2.2517	4.38793	2.2517	0.725823	4.08276	0.729946	-0.754691	-0.630972
18.9	-0.189704	-0.189704	1.33617	0.420648	1.031	2.86618	0.160836	0.284556
18.95	4.38793	1.94653	4.08276	3.77758	0.420648	1.64547	2.90742	4.55702
19	-0.189704	2.2517	0.725823	0.115472	4.08276	0.729946	5.04365	-0.325796
19.05	1.94653	1.33617	5.91381	4.08276	0.115472	1.03512	1.68671	-0.02062
19.1	2.2517	4.08276	1.031	1.031	1.94653	1.03512	1.38154	2.42079
19.15	1.33617	0.725823	6.52416	0.420648	-0.189704	3.47653	3.21259	3.33631
19.2	4.08276	5.91381	-0.800055	4.08276	-2.63111	1.3403	4.73847	-0.936147
19.25	0.725823	1.031	3.16723	0.115472	3.77758	-1.71146	2.29707	1.64547
19.3	5.91381	6.52416	0.420648	1.94653	-1.10523	-1.10111	1.68671	0.729946
19.35	1.031	-0.800055	1.33617	-0.189704	0.725823	0.729946	1.12812	1.03512
19.4	6.52416	3.16723	-0.49488	-2.63111	3.77758	1.95065	1.48505	1.03512
19.45	-0.800055	0.420648	-1.10523	3.77758	1.33617	-1.71146	-1.33617	-3.47653
19.5	3.16723	1.33617	2.2517	-1.10523	3.47241	-2.62699	-10.4724	-40.3403
19.55	0.420648	-0.49488	-0.800055	0.725823	3.16723	-2.62699	-12.1672	-51.7115
19.6	1.33617	-1.10523	4.69311	3.77758	-0.259811	-0.185581	-15.2598	-145.589
19.65	-0.49488	2.2517	-0.49488	1.33617	2.48677	-2.11959	-13.4868	-149.862
19.7	-1.10523	-0.800055	2.2517	3.47241	0.655716	-2.93216	-13.6557	-148.336
19.75	2.2517	4.69311	0.725823	3.16723	-1.17534	-3.84769	-13.1753	-144.979
19.8	-0.800055	-0.49488	0.420648	-3.23734	-0.870163	-2.62699	-14.8702	-149.862
19.85	4.69311	2.2517	3.77758	2.86618	-0.259811	1.95065	-14.0909	-151.388
19.9	-0.49488	0.725823	0.115472	-2.32181	3.4023	-1.40628	-14.0909	-148.641
19.95	2.2517	0.420648	4.08276	-1.10111	1.57124	-1.71146	-15.9609	-154.745
20	0.725823	3.77758	1.031	2.561	-2.09087	-4.1196	-15.7919	-156.881
20.05	0.420648	0.115472	0.420648	-0.185581	-2.09087	-4.42477	-16.0909	-153.829
20.1	3.77758	4.08276	4.08276	-1.40628	-2.09087	-5.40628	-16.0909	-160.238
20.15	0.115472	1.031	0.115472	2.86618	0.960892	-5.72995	-17.9609	-162.984
20.2	4.08276	0.420648	1.94653	0.729946	2.79195	-6.42477	-17.7919	-161.459
20.25	1.031	4.08276	-0.189704	-0.185581	-0.564987	-6.62699	-30.565	-166.647
20.3	0.420648	0.115472	-2.63111	1.64547	-0.259811	-7.3403	-40.2598	-170.004
20.35	4.08276	1.94653	3.77758	0.42477	2.48677	-8.01664	-59.9506	-170.004
20.4	0.115472	-0.189704	-1.10523	-0.490757	4.623	-8.10111	-60.4063	-173.666
20.45	1.94653	-2.63111	0.725823	2.25583	-0.259811	-9.3403	-61.7115	-178.243
20.5	-0.189704	3.77758	3.77758	3.17135	1.57124	-10.0166	-70.1196	-179.769
20.55	-2.63111	-1.10523	1.33617	0.119595	5.23335	-12.2558	-90.4248	-180.99
20.6	3.77758	0.725823	3.47241	1.3403	0.655716	-13.5425	-101.406	-185.567
20.65	-1.10523	3.77758	3.16723	4.39206	-1.17534	-10.7959	-102.989	-186.788
20.7	0.725823	1.33617	-3.23734	0.119595	1.57124	-12.627	-105.158	-184.652
20.75	3.77758	3.47241	2.86618	0.42477	-3.00639	-12.3218	-106.651	-189.84
20.8	1.33617	3.16723	-2.32181	3.7817	-2.39604	-12.627	-107.261	-191.366
20.85	3.47241	1.94653	-1.10111	0.42477	-1.17534	-18.1529	-106.346	-188.314
20.9	3.16723	4.69311	2.561	-0.490757	-3.61674	-21.4063	-108.177	-191.366
20.95	1.94653	-0.564987	-0.185581	1.95065	1.87642	-22.9322	-111.228	-195.028
21	4.69311	-3.31157	-1.40628	1.03512	-0.259811	-21.0351	-110.923	-195.943
21.05	1.94653	-2.09087	2.86618	-0.490757	2.48677	-23.5425	-109.092	-194.418
21.1	-3.85181	0.960892	0.729946	1.03512	0.655716	-20.4248	-113.975	-199.911
21.15	-1.71558	2.48677	-0.185581	3.17135	-1.17534	-24.458	-114.89	-200.826
21.2	-0.49488	-0.870163	1.64547	-1.40628	-0.870163	-26.4908	-111.534	-196.859
21.25	-2.32593	1.26607	0.42477	-0.185581	-0.259811	-28.3736	-117.332	-199.911
21.3	1.33617	2.1816	-0.490757	3.17135	3.4023	-32.9322	-118.553	-201.131
21.35	0.420648	3.70747	2.25583	-0.185581	1.57124	-42.9102	-117.637	-200.216
21.4	-0.800055	-1.17534	3.17135	-2.01664	-2.09087	-44.4361	-117.637	-198.385
21.45	1.64135	-0.564987	0.119595	-1.10111	-2.09087	-45.0464	-120.994	-203.268
21.5	0.420648	1.26607	1.3403	1.95065	-2.09087	-39.8584	-121.299	-203.878
21.55	-0.49488	3.70747	4.39206	-2.32181	0.960892	-45.6568	-118.553	-202.047
21.6	1.94653	0.35054	0.119595	-2.32181	2.79195	-42.9102	-123.741	-203.573
21.65	1.64135	-0.564987	0.42477	-0.185581	-0.564987	-44.1309	-124.656	-207.235
21.7	-0.49488	0.045364	3.7817	1.03512	-0.259811	-46.8775	-122.825	-205.404
21.75	1.33617	2.79195	0.42477	-2.62699	2.48677	-43.8257	-121.909	-202.963
21.8	3.47241	1.87642	-0.490757	-2.62699	4.623	-48.7085	-126.792	-206.625
21.85	0.420648	-1.48052	1.95065	1.95065	-0.259811	-48.0982	-128.929	-209.066
21.9	3.16723	-1.48052	1.03512	0.119595	1.57124	-44.4361	-126.182	-207.54
21.95	4.38793	-0.564987	-0.490757	-1.40628	5.23335	-48.4034	-128.623	-205.099
22	0.420648	1.26607	1.03512	-0.490757	0.655716	-44.7412	-132.896	-209.676
22.05	2.2517	-3.92192	3.17135	1.03512	-1.17534	-43.2154	-132.285	-208.761
22.1	5.91381	-4.2271	-1.40628	-2.32181	1.57124	-45.6568	-130.149	-207.845
22.15	1.031	-2.70122	-0.185581	-2.01664	-3.00639	-42.9102	-133.811	-206.014
22.2	3.16723	-0.564987	3.17135	-0.490757	-2.39604	-42.605	-135.948	-210.287
22.25	6.52416	-1.17534	-0.185581	1.3403	-1.17534	-44.7412	-135.032	-210.897
22.3	2.2517	-4.53227	-2.01664	-2.32181	-3.61674	-41.0791	-131.98	-208.761
22.35	1.33617	-3.00639	-1.10111	-0.795933	1.87642	-46.2671	-136.863	-207.54
22.4	5.30346	-0.870163	1.95065	1.95065	-1.89291	-45.3516	-138.389	-212.118
22.45	2.86205	0.655716	-2.32181	3.7817	-3.11362	-41.9947	-136.863	-212.728
22.5	0.420648	-1.17534	-2.32181	-0.795933	1.46402	-47.1827	-135.032	-211.507
22.55	1.94653	-3.31157	-0.185581	0.119595	-2.50327	-47.4878	-137.779	-210.897
22.6	2.55688	-1.78569	1.03512	0.42477	-0.06186	-44.4361	-138.389	-216.085
22.65	-0.189704	-1.17534	-2.62699	1.95065	-0.977387	-49.9292	-137.168	-217.001
22.7	1.33617	2.1816	-2.62699	-3.23734	-2.19809	-48.7085	-135.032	-217.001
22.75	4.08276	-1.78569	1.95065	-3.84769	1.7692	-46.2671	-138.999	-214.559
22.8	-0.189704	-2.39604	0.119595	-2.01664	-3.72397	-51.7603	-138.389	-219.747
22.85	-0.49488	-1.48052	-1.40628	0.729946	-2.19809	-49.3189	-138.694	-223.104
22.9	2.86205	-0.259811	-0.490757	-3.84769	-0.977387	-47.4878	-135.337	-222.799
22.95	1.031	2.48677	1.03512	-3.54251	-3.41879	-51.7603	-140.22	-220.052
23	-0.49488	0.655716	-2.32181	-2.01664	-0.977387	-50.2344	-141.746	-223.714
23.05	1.64135	-1.17534	-2.01664	1.3403	-2.50327	-46.8775	-142.356	-227.377
23.1	4.38793	-0.870163	-0.490757	0.729946	-3.41879	-50.8448	-139.305	-227.377
23.15	1.64135	-0.259811	1.3403	-2.32181	0.853667	-50.5396	-141.746	-224.325
23.2	1.33617	3.4023	-2.32181	-1.10111	-3.72397	-48.4034	-144.492	-224.935
23.25	4.69311	1.57124	-0.795933	1.03512	-2.19809	-52.981	-145.103	-229.208
23.3	4.69311	-2.09087	1.95065	1.3403	2.07437	-51.1499	-143.272	-229.818
23.35	1.94653	-2.09087	3.7817	-1.10111	-2.50327	-48.7085	-142.356	-228.597
23.4	2.86205	-2.09087	-0.795933	-0.490757	-0.06186	-53.2862	-145.713	-226.766
23.45	6.21899	0.960892	0.119595	0.729946	1.46402	-52.3706	-145.103	-230.428
23.5	4.38793	2.79195	0.42477	2.86618	-0.06186	-49.6241	-143.577	-232.87
23.55	3.16723	-0.564987	1.95065	1.64547	2.07437	-54.2017	-142.051	-231.954
23.6	4.08276	-0.259811	-3.23734	0.729946	0.548492	-54.5069	-144.798	-228.902
23.65	4.99828	2.48677	-3.84769	1.03512	-0.672212	-49.9292	-146.018	-227.987
23.7	0.420648	4.623	-2.01664	1.03512	1.46402	-53.5913	-146.629	-231.344
23.75	0.420648	-0.259811	0.729946	3.47653	-0.06186	-54.5069	-143.882	-232.259
23.8	3.16723	1.57124	-3.84769	1.3403	-1.58774	-52.3706	-143.272	-231.954
23.85	4.08276	5.23335	-3.54251	-1.71146	0.243316	-55.4224	-147.239	-229.818
23.9	0.115472	0.655716	-2.01664	-1.10111	-2.80844	-56.9483	-148.765	-229.208
23.95	1.33617	-1.17534	1.3403	0.729946	-2.80844	-56.0327	-148.155	-233.175
24	4.69311	1.57124	0.729946	1.95065	1.15884	-55.7276	-145.103	-232.565
24.05	3.77758	-3.00639	-2.32181	-1.71146	-3.41879	-60.9156	-145.713	-232.565
24.1	1.64135	-2.39604	-1.10111	-2.62699	-2.19809	-60.3052	-149.986	-230.734
24.15	2.86205	-1.17534	1.03512	-2.62699	0.548492	-56.3379	-149.986	-229.208
24.2	6.52416	-3.61674	1.3403	-0.185581	-4.02914	-61.2207	-150.596	-232.565
24.25	4.38793	1.87642	-1.10111	0.119595	-4.94467	-62.4414	-148.46	-232.87
24.3	1.64135	-3.00639	-0.490757	-2.93216	-1.89291	-59.3897	-148.765	-231.649
24.35	1.64135	-0.564987	0.729946	-3.84769	-4.6395	-62.1363	-153.037	-229.818
24.4	3.16723	-1.17534	2.86618	-2.62699	-4.33432	-64.2725	-155.174	-233.175
24.45	2.55688	-3.00639	1.64547	1.95065	-0.977387	-63.6621	-154.563	-235.006
24.5	-0.800055	1.57124	0.729946	-1.40628	-3.72397	-62.7466	-152.732	-232.565
24.55	0.115472	-1.78569	1.03512	-1.71146	-3.41879	-66.1035	-153.343	-232.259
24.6	3.16723	2.48677	1.03512	0.119595	0.853667	-66.1035	-157.005	-235.921
24.65	3.77758	-2.39604	3.47653	0.42477	0.243316	-63.6621	-159.446	-234.701
24.7	0.420648	1.26607	1.3403	-1.40628	-0.672212	-66.4087	-160.056	-231.344
24.75	0.420648	-0.564987	-1.71146	0.729946	1.46402	-67.3242	-161.277	-236.227
24.8	1.33617	-0.564987	-1.10111	0.42477	1.15884	-65.7984	-160.362	-234.09
24.85	4.08276	0.35054	0.729946	-2.62699	-0.977387	-63.6621	-162.803	-231.954
24.9	0.115472	-0.870163	1.95065	1.3403	0.243316	-67.0191	-167.381	-234.09
24.95	-0.800055	2.48677	-1.71146	-2.01664	1.46402	-66.7139	-168.296	-229.818
25	1.031	-1.17534	-2.62699	-1.10111	-3.11362	-61.8311	-167.381	-235.311
25.05	4.08276	3.09712	-2.62699	1.3403	-3.41879	-61.5259	-165.855	-232.565
25.1	3.47241	-0.870163	-0.185581	-2.01664	-0.977387	-64.5777	-164.634	-233.175
25.15	1.031	1.26607	0.119595	2.25583	-6.16538	-62.7466	-165.855	-234.09
25.2	3.16723	3.09712	-2.93216	-3.54251	-5.24985	-59.6949	-168.907	-231.954
25.25	5.30346	0.045364	-3.84769	-0.795933	-1.28256	-63.0518	-167.686	-235.616
25.3	7.43969	4.623	-2.62699	-2.62699	-3.11362	-65.188	-168.296	-231.039
25.35	4.38793	0.35054	1.95065	-2.32181	-4.33432	-63.6621	-165.244	-235.921
25.4	3.16723	2.48677	-1.40628	-2.62699	-1.28256	-60.6104	-164.329	-231.954
25.45	4.08276	3.09712	-1.71146	-4.15287	0.853667	-65.7984	-165.855	-235.921
25.5	6.21899	0.045364	0.119595	-1.40628	-4.02914	-66.4087	-168.296	-233.785
25.55	7.43969	2.48677	0.42477	-2.93216	-2.19809	-65.188	-167.076	-236.532
25.6	3.47241	-0.870163	-1.40628	1.03512	-0.06186	-62.7466	-167.381	-235.616
25.65	3.47241	-1.78569	0.729946	-3.54251	-4.02914	-67.0191	-166.16	-236.227
25.7	4.38793	1.57124	0.42477	0.42477	-4.02914	-67.0191	-163.108	-235.921
25.75	5.60864	-1.78569	-2.62699	-4.45804	-3.11362	-65.4932	-163.413	-233.785
25.8	6.82934	0.960892	1.3403	-0.490757	-3.11362	-63.9673	-166.465	-236.532
25.85	3.77758	3.09712	-2.01664	-5.37357	-5.8602	-67.3242	-167.381	-232.259
25.9	2.86205	0.35054	-1.10111	-2.93216	-4.6395	-67.6294	-166.16	-236.227
25.95	2.55688	4.31783	1.3403	-1.1341	-1.28256	-66.7139	-163.413	-231.039
26	4.99828	4.01265	-2.01664	0.391781	-5.24985	-63.6621	-161.277	-235.921
26.05	4.08276	2.48677	2.25583	0.696957	-4.6395	-67.9346	-164.939	-234.701
26.1	0.725823	6.14888	-3.54251	-2.3548	-1.89291	-68.545	-165.855	-235.311
26.15	1.33617	3.09712	-0.795933	-2.65998	-0.672212	-67.9346	-164.939	-238.668
26.2	3.77758	2.48677	-2.62699	1.00213	-3.72397	-65.4932	-160.972	-235.311
26.25	3.77758	6.45406	-2.32181	-3.88068	-3.11362	-68.2398	-167.381	-242.025
26.3	1.031	0.655716	-2.62699	-3.27033	-0.06186	-70.376	-167.991	-240.499
26.35	2.86205	0.960892	-4.15287	0.391781	-2.19809	-70.6812	-164.939	-239.889
26.4	5.60864	3.70747	-1.40628	-0.523746	-4.94467	-68.2398	-167.076	-241.109
26.45	0.420648	-1.17534	-2.93216	-2.96515	-3.72397	-69.1553	-168.601	-236.532
26.5	1.33617	-2.39604	1.03512	-2.04962	-0.06186	-71.9019	-166.465	-240.804
26.55	4.69311	1.87642	-3.54251	1.00213	-2.50327	-71.5967	-167.076	-238.363
26.6	-0.49488	-3.00639	0.42477	-1.74445	-3.72397	-69.4605	-167.076	-236.227
26.65	2.2517	-2.70122	-4.45804	-2.65998	-1.89291	-68.2398	-162.498	-239.278
26.7	1.94653	0.655716	-0.490757	-0.828922	1.46402	-70.376	-167.381	-236.532
26.75	0.420648	-3.61674	-5.37357	1.91766	-3.41879	-71.5967	-163.719	-238.058
26.8	4.99828	-3.61674	-2.93216	-2.96515	-3.41879	-70.376	-162.498	-238.058
26.85	0.725823	1.87642	-0.527872	-2.65998	-3.72397	-67.3242	-163.719	-234.396
26.9	5.91381	-2.39604	2.52389	0.086605	0.853667	-67.9346	-160.056	-239.278
26.95	3.16723	-2.39604	0.692832	1.91766	-2.50327	-71.2915	-165.55	-238.363
27	4.08276	1.26607	-0.222696	-1.74445	-4.33432	-71.2915	-163.108	-235.006
27.05	3.16723	-2.39604	1.91353	-2.3548	-2.50327	-70.376	-163.719	-238.363
27.1	1.64135	-0.870163	0.692832	0.391781	-0.977387	-68.2398	-167.686	-236.227
27.15	4.08276	0.045364	-0.833047	-0.828922	-4.33432	-70.0708	-164.024	-235.311
27.2	1.33617	-1.17534	1.30318	-3.5755	-4.94467	-73.7329	-168.601	-237.142
27.25	4.99828	-1.78569	0.387656	-2.3548	-4.6395	-74.6485	-165.55	-233.785
27.3	0.725823	0.35054	-2.6641	0.696957	-3.11362	-72.8174	-170.127	-236.532
27.35	5.30346	-1.48052	-0.833047	-0.218571	-4.94467	-70.6812	-170.738	-237.142
27.4	0.725823	-3.00639	0.387656	-2.3548	-6.16538	-74.0381	-167.076	-231.954
27.45	4.38793	0.655716	-3.57963	-1.43927	-6.47055	-76.7847	-170.738	-236.227
27.5	1.031	0.655716	-2.35893	1.91766	-2.19809	-75.8692	-166.16	-236.837
27.55	2.86205	-2.70122	-0.222696	1.00213	-1.89291	-73.4278	-170.432	-232.565
27.6	2.86205	-2.39604	-3.88481	-1.1341	-5.24985	-70.9864	-170.127	-237.142
27.65	1.33617	0.35054	-2.6641	-0.218571	-4.94467	-74.3433	-165.244	-236.227
27.7	3.47241	-3.61674	0.998007	1.61248	-2.19809	-76.4795	-170.432	-234.09
27.75	-0.49488	-3.31157	-1.4434	2.83319	0.243316	-75.564	-169.212	-238.973
27.8	3.77758	0.35054	-1.13822	-0.218571	-2.50327	-72.8174	-170.432	-238.363
27.85	-1.41041	-2.39604	0.692832	0.391781	-2.50327	-72.2071	-172.263	-235.616
27.9	-0.800055	-2.09087	-0.222696	2.22284	-1.89291	-74.9536	-169.212	-241.415
27.95	-0.189704	-0.564987	-2.96928	4.05389	0.548492	-74.0381	-173.789	-242.025
28	-1.71558	-0.870163	-0.222696	1.00213	-0.672212	-71.2915	-173.789	-238.058
28.05	4.08276	-3.92192	1.60836	1.61248	-3.11362	-74.9536	-168.601	-242.025
28.1	-0.49488	-2.70122	-3.88481	2.52801	-2.50327	-74.0381	-173.789	-241.109
28.15	1.94653	1.26607	-3.57963	5.27459	-1.28256	-68.8501	-173.484	-238.058
28.2	3.47241	-3.31157	-0.527872	1.91766	2.37955	-73.7329	-168.601	-243.246
28.25	0.725823	-3.31157	-1.4434	0.086605	-0.367036	-71.2915	-171.653	-241.109
28.3	3.47241	0.960892	-3.57963	1.91766	-2.19809	-70.0708	-171.653	-236.227
28.35	-0.49488	1.26607	-1.13822	2.22284	-0.977387	-71.5967	-166.465	-241.109
28.4	1.031	-1.48052	2.52389	4.05389	1.46402	-65.7984	-171.348	-238.668
28.45	3.47241	0.655716	-1.4434	-0.218571	2.68472	-70.376	-170.738	-234.396
28.5	-1.10523	4.623	0.387656	-0.218571	0.243316	-67.9346	-166.465	-237.447
28.55	1.94653	2.48677	2.52389	-0.828922	-1.89291	-70.0708	-171.043	-236.837
28.6	3.16723	4.31783	3.13424	1.91766	-0.672212	-70.0708	-170.127	-233.175
28.65	1.031	5.23335	0.692832	1.30731	0.243316	-67.6294	-166.77	-236.837
28.7	4.08276	7.36958	0.08248	-0.828922	0.853667	-71.5967	-168.907	-237.447
28.75	0.725823	3.09712	2.82906	-0.828922	-2.19809	-65.7984	-169.822	-233.175
28.8	-1.10523	3.70747	-1.13822	0.696957	-2.50327	-70.0708	-167.076	-235.311
28.85	2.86205	5.53853	-1.4434	4.35907	-1.28256	-65.188	-168.296	-235.616
28.9	-1.71558	4.92818	0.692832	1.61248	2.37955	-70.376	-169.822	-232.259
28.95	-0.49488	1.87642	2.82906	-0.828922	-1.28256	-67.3242	-167.686	-231.039
29	2.55688	2.1816	-0.833047	0.391781	-2.80844	-70.0708	-167.381	-234.396
29.05	-1.71558	4.92818	-0.833047	1.30731	-0.06186	-69.4605	-170.738	-232.565
29.1	0.420648	1.87642	2.82906	4.66424	0.243316	-70.6812	-167.686	-227.987
29.15	1.64135	1.26607	4.04976	2.83319	-2.80844	-70.9864	-164.939	-233.175
29.2	-1.10523	2.48677	-0.527872	1.00213	-0.06186	-68.8501	-169.822	-232.259
29.25	2.55688	5.23335	-0.833047	2.22284	0.243316	-72.5122	-169.212	-228.902
29.3	1.94653	1.87642	0.387656	3.44354	-2.19809	-68.2398	-164.634	-230.734
29.35	-0.49488	-0.564987	1.30318	5.57977	1.46402	-73.1226	-167.686	-231.039
29.4	1.94653	1.57124	-4.18998	4.05389	-3.41879	-68.8501	-168.907	-228.902
29.45	0.725823	4.31783	-2.6641	2.22284	-0.367036	-72.2071	-165.244	-227.682
29.5	-0.49488	1.26607	-0.222696	3.44354	1.15884	-70.376	-166.16	-232.259
29.55	1.64135	0.35054	-0.222696	3.74871	-2.19809	-68.2398	-169.822	-231.039
29.6	1.031	1.87642	-4.18998	6.4953	2.9899	-70.376	-167.381	-226.156
29.65	-0.49488	5.8437	-3.57963	2.22284	-2.80844	-65.188	-165.55	-231.039
29.7	3.77758	3.09712	-0.833047	1.30731	2.68472	-69.4605	-169.517	-231.039
29.75	1.031	0.960892	0.998007	3.13836	-1.89291	-68.2398	-169.517	-229.208
29.8	0.725823	1.57124	-3.27445	4.96942	0.243316	-65.7984	-166.16	-226.766
29.85	4.08276	4.01265	-2.96928	0.086605	-0.977387	-69.4605	-167.381	-231.649
29.9	2.86205	2.79195	-0.833047	0.086605	-2.19809	-65.7984	-168.907	-229.818
29.95	1.33617	-0.564987	1.60836	4.66424	0.243316	-69.7657	-166.16	-226.156
30	4.08276	1.57124	-1.74857	-0.828922	-3.41879	-70.6812	-162.803	-228.292
30.05	3.16723	3.70747	-3.27445	-1.1341	0.853667	-66.1035	-166.465	-229.818
30.1	2.2517	5.8437	-1.13822	2.22284	-3.41879	-71.9019	-167.076	-227.682
30.15	4.69311	2.48677	1.60836	-1.43927	0.853667	-69.7657	-165.244	-222.799
30.2	4.08276	2.48677	-1.74857	2.22284	-5.8602	-70.6812	-164.024	-224.02
30.25	1.031	3.70747	-2.6641	-0.828922	-2.19809	-73.1226	-167.381	-223.104
30.3	3.16723	7.67476	-0.527872	-0.218571	-6.47055	-68.2398	-166.465	-220.358
30.35	4.08276	4.92818	-0.527872	3.44354	-4.02914	-70.9864	-163.108	-218.221
30.4	0.420648	3.09712	-3.88481	-0.218571	-5.8602	-71.5967	-164.329	-221.273
30.45	2.2517	3.4023	-1.74857	3.44354	-5.24985	-67.3242	-166.465	-221.273
30.5	5.30346	5.8437	-2.6641	-1.74445	-2.19809	-71.9019	-165.55	-221.273
30.55	0.420648	6.45406	-3.88481	0.696957	-4.94467	-70.376	-161.277	-219.137
30.6	1.031	3.4023	-0.222696	-1.43927	-0.367036	-68.8501	-164.329	-223.714
30.65	4.99828	3.70747	-3.88481	-0.523746	-5.55502	-72.2071	-165.244	-224.325
30.7	1.94653	4.31783	-2.6641	-0.218571	-2.50327	-69.1553	-163.719	-222.799
30.75	1.33617	6.14888	-0.527872	-1.1341	-2.19809	-69.4605	-160.972	-223.409
30.8	3.77758	6.75923	-2.6641	1.30731	-4.02914	-72.5122	-163.413	-223.714
30.85	2.86205	3.09712	3.43941	-1.43927	-0.06186	-69.4605	-164.024	-224.325
30.9	0.115472	3.4023	-1.74857	2.52801	-4.02914	-68.545	-163.108	-222.494
30.95	2.86205	3.70747	2.82906	-2.04962	-2.80844	-70.6812	-161.277	-220.968
31	4.99828	6.45406	-1.13822	2.83319	-2.19809	-66.4087	-164.939	-224.325
31.05	0.420648	5.53853	2.21871	-0.523746	-4.6395	-69.4605	-164.939	-222.799
31.1	1.64135	4.01265	-3.27445	0.391781	-1.89291	-70.9864	-164.634	-220.968
31.15	5.30346	3.4023	0.998007	0.086605	-4.6395	-67.0191	-163.108	-220.052
31.2	2.2517	4.623	-2.05375	-0.523746	-4.6395	-69.1553	-167.686	-224.325
31.25	1.64135	6.45406	0.692832	2.52801	-0.672212	-69.7657	-168.907	-223.714
31.3	2.86205	7.67476	-2.96928	-2.04962	-4.6395	-65.4932	-168.296	-222.494
31.35	2.55688	2.79195	-0.833047	1.61248	-1.89291	-67.9346	-165.855	-221.273
31.4	-0.49488	0.960892	-2.6641	-1.74445	-1.28256	-68.2398	-167.686	-224.325
31.45	0.115472	1.87642	0.692832	-1.43927	-3.41879	-65.4932	-169.212	-226.156
31.5	3.16723	3.70747	-2.05375	2.22284	1.15884	-69.1553	-168.601	-225.546
31.55	1.94653	4.92818	0.998007	-2.04962	-2.19809	-69.1553	-164.634	-223.409
31.6	0.115472	1.26607	-1.74857	0.391781	-2.19809	-66.7139	-164.939	-224.02
31.65	2.86205	-1.48052	0.692832	-2.3548	3.29507	-70.376	-166.16	-226.156
31.7	4.99828	-0.259811	-0.527872	-2.04962	-3.41879	-71.2915	-164.634	-226.156
31.75	1.33617	1.57124	-0.833047	1.61248	-2.19809	-68.545	-162.193	-224.325
31.8	2.86205	3.70747	-1.13822	-2.3548	-0.06186	-71.2915	-159.751	-221.273
31.85	5.30346	1.87642	-2.6641	-0.218571	-4.6395	-72.2071	-161.582	-223.714
31.9	4.99828	-0.870163	-0.222696	0.086605	-3.41879	-69.7657	-160.972	-222.189
31.95	0.420648	0.35054	-3.57963	-2.65998	-3.72397	-71.2915	-159.751	-221.273
32	1.94653	4.92818	0.998007	0.086605	-5.55502	-73.1226	-158.225	-217.611
32.05	4.99828	1.57124	-2.96928	-0.218571	-2.80844	-69.4605	-158.531	-216.39
32.1	3.77758	-0.259811	0.998007	-1.74445	-2.80844	-69.7657	-162.803	-219.442
32.15	1.031	0.35054	-4.18998	2.83319	-4.02914	-71.9019	-161.277	-219.137
32.2	2.2517	1.87642	-2.96928	-1.74445	-0.06186	-69.7657	-160.667	-218.832
32.25	5.30346	-3.92192	-2.6641	-0.828922	-1.58774	-67.3242	-157.615	-216.085
32.3	2.2517	-2.09087	-3.27445	2.52801	-1.89291	-72.2071	-160.667	-217.916
32.35	-0.189704	-1.17534	0.08248	-2.04962	0.853667	-71.2915	-163.413	-221.578
32.4	1.33617	-4.53227	-2.96928	-0.828922	-1.89291	-65.7984	-163.108	-221.273
32.45	4.99828	-1.78569	1.30318	1.30731	-2.80844	-70.0708	-160.667	-219.747
32.5	1.64135	-6.05815	-2.35893	-2.96515	0.243316	-70.6812	-158.836	-214.864
32.55	0.115472	-4.53227	-0.527872	-0.523746	-3.72397	-67.9346	-161.582	-215.78
32.6	1.031	-1.78569	-0.527872	-0.218571	-4.6395	-68.8501	-163.719	-218.832
32.65	5.91381	-4.83745	-2.35893	-1.74445	-0.977387	-70.0708	-163.413	-217.306
32.7	2.86205	-0.564987	1.91353	0.696957	-3.41879	-68.2398	-161.582	-214.864
32.75	0.115472	-4.53227	-4.49516	0.696957	-3.41879	-66.4087	-160.362	-213.338
32.8	0.115472	-1.48052	-1.74857	-1.43927	0.548492	-69.1553	-162.498	-217.001
32.85	3.77758	-2.70122	-2.05375	0.086605	-0.977387	-68.545	-164.634	-215.475
32.9	3.16723	-3.00639	-2.35893	0.086605	-1.89291	-64.5777	-162.803	-212.728
32.95	0.420648	-1.17534	1.91353	-1.1341	0.243316	-67.6294	-162.498	-216.39
33	1.33617	-3.61674	-4.18998	1.30731	-0.367036	-68.545	-159.141	-218.221
33.05	3.47241	0.35054	-1.74857	0.696957	-3.72397	-65.7984	-160.667	-215.475
33.1	4.99828	-4.2271	-1.4434	-0.828922	-1.89291	-64.5777	-162.803	-219.747
33.15	1.33617	0.35054	-2.96928	2.22284	-1.89291	-68.2398	-161.582	-219.442
33.2	0.725823	-1.48052	1.60836	2.22284	-5.55502	-67.9346	-161.277	-217.001
33.25	2.55688	0.960892	-3.57963	-0.218571	-4.02914	-62.1363	-159.751	-221.273
33.3	4.69311	0.35054	-2.05375	2.22284	-2.80844	-63.9673	-158.225	-216.695
33.35	2.2517	0.655716	0.692832	2.52801	-5.8602	-66.7139	-159.751	-219.747
33.4	-0.800055	5.23335	-2.05375	-0.828922	-6.16538	-64.5777	-160.972	-218.526
33.45	0.420648	2.1816	0.998007	0.391781	-1.28256	-61.8311	-159.751	-217.611
33.5	3.16723	6.14888	-1.74857	1.91766	-5.55502	-65.188	-159.141	-219.442
33.55	4.69311	1.57124	-2.05375	-0.523746	-6.16538	-65.7984	-157.005	-214.254
33.6	1.031	1.57124	1.91353	0.391781	-2.80844	-63.9673	-155.479	-218.221
33.65	0.115472	4.01265	-4.18998	2.83319	-7.0809	-62.4414	-158.531	-212.728
33.7	1.64135	0.045364	-1.74857	-2.04962	-6.16538	-66.1035	-160.056	-217.611
33.75	3.47241	2.79195	-1.4434	0.696957	-4.6395	-65.4932	-158.225	-213.949
33.8	3.16723	-1.17534	-3.57963	4.35907	-3.41879	-64.8828	-157.31	-215.17
33.85	-0.49488	-1.78569	0.692832	-1.43927	-7.0809	-64.8828	-155.174	-213.644
33.9	-1.10523	0.960892	-3.27445	-1.74445	-5.55502	-67.9346	-154.563	-214.864
33.95	0.115472	-4.53227	-2.05375	1.00213	-2.19809	-67.9346	-156.7	-215.17
34	1.94653	-2.09087	2.52389	-0.828922	-5.8602	-66.1035	-158.836	-212.118
34.05	-0.49488	-0.870163	-2.05375	-2.04962	-5.55502	-66.1035	-158.225	-215.475
34.1	-2.93629	-3.31157	0.08248	-0.218571	-3.11362	-67.6294	-158.836	-212.423
34.15	-2.32593	0.655716	0.998007	-0.218571	-2.80844	-67.0191	-157.31	-217.001
34.2	-0.800055	-1.78569	-1.13822	-2.96515	-4.33432	-63.9673	-154.258	-210.592
34.25	1.64135	-0.259811	2.21871	-1.74445	-2.80844	-63.357	-156.394	-216.085
34.3	1.031	3.4023	0.692832	1.30731	0.243316	-67.6294	-158.836	-212.423
34.35	-0.189704	-0.564987	-0.222696	-2.65998	-2.80844	-66.1035	-158.225	-213.338
34.4	-0.189704	0.35054	3.43941	-1.43927	-3.11362	-64.5777	-156.089	-213.338
34.45	1.031	3.70747	0.692832	2.22284	-1.58774	-64.8828	-152.732	-208.456
34.5	2.55688	0.35054	-1.4434	-0.218571	-0.977387	-68.545	-156.089	-212.118
34.55	-1.41041	1.57124	3.74459	-2.04962	-3.41879	-68.2398	-155.784	-209.066
34.6	-0.189704	2.79195	-0.222696	-0.523746	-3.11362	-66.4087	-152.122	-211.507
34.65	3.16723	-0.870163	0.387656	2.52801	-0.367036	-65.7984	-151.817	-212.423
34.7	1.64135	0.960892	3.74459	-1.1341	-2.50327	-69.1553	-153.343	-208.456
34.75	-0.800055	1.57124	-1.13822	-0.828922	-4.6395	-70.0708	-151.817	-214.254
34.8	2.86205	-2.39604	-0.527872	1.91766	-2.19809	-68.8501	-149.986	-211.813
34.85	2.2517	0.960892	2.52389	2.22284	1.46402	-66.1035	-151.817	-211.507
34.9	-0.189704	2.1816	-1.74857	0.391781	-2.50327	-68.545	-148.155	-213.949
34.95	4.69311	-0.564987	-1.4434	1.61248	-3.41879	-69.1553	-149.07	-208.15
35	-0.800055	1.57124	2.82906	5.88495	-2.19809	-68.545	-151.206	-212.118
35.05	0.420648	2.48677	-1.4434	1.00213	0.853667	-65.7984	-146.324	-208.456
35.1	1.031	0.655716	0.998007	0.086605	-4.33432	-63.357	-151.512	-204.794
35.15	-1.71558	3.70747	3.13424	0.696957	-3.72397	-65.7984	-150.291	-208.15
35.2	3.47241	5.53853	-0.222696	2.22284	-1.58774	-64.2725	-150.291	-204.183
35.25	-1.71558	3.4023	0.692832	-0.828922	0.243316	-62.4414	-153.343	-204.183
35.3	1.94653	6.14888	3.43941	-1.74445	-4.6395	-60	-149.68	-204.794
35.35	-0.49488	8.28511	-0.833047	1.30731	-4.33432	-61.2207	-155.174	-201.131
35.4	1.031	5.8437	0.387656	0.391781	-1.58774	-63.9673	-153.648	-202.963
35.45	0.725823	7.06441	4.35494	-1.1341	-0.06186	-63.0518	-156.394	-204.183
35.5	0.420648	9.20064	0.387656	-0.828922	-4.02914	-62.1363	-157.005	-199.3
35.55	1.94653	4.92818	-0.222696	1.61248	-3.72397	-59.0845	-153.343	-203.878
35.6	-0.49488	5.53853	4.35494	0.696957	-2.80844	-62.4414	-157.31	-203.878
35.65	2.86205	8.59029	0.998007	-2.3548	-0.367036	-63.6621	-153.648	-200.216
35.7	-1.41041	3.4023	1.60836	-0.828922	-2.50327	-64.2725	-156.089	-205.709
35.75	2.86205	4.623	5.27047	2.83319	-3.11362	-62.7466	-154.868	-203.573
35.8	-2.32593	7.36958	1.60836	1.91766	-1.28256	-60.3052	-153.953	-201.131
35.85	2.55688	3.09712	0.08248	-1.43927	2.07437	-63.9673	-157.31	-205.404
35.9	-2.63111	2.48677	1.60836	-0.523746	-0.06186	-64.8828	-151.817	-202.047
35.95	0.115472	6.14888	2.52389	2.52801	-2.50327	-64.8828	-156.394	-201.131
36	-0.189704	6.45406	-1.4434	-0.523746	-1.89291	-62.7466	-155.479	-202.963
36.05	-1.10523	4.31783	0.387656	-3.27033	1.46402	-59.6949	-152.122	-200.216
36.1	3.16723	7.67476	3.74459	-2.65998	1.46402	-63.6621	-157.005	-198.995
36.15	-2.02076	8.89546	-2.35893	-0.218571	-2.19809	-62.7466	-153.648	-200.521
36.2	2.2517	5.23335	-2.35893	-1.43927	-0.672212	-60.6104	-153.953	-198.385
36.25	-1.10523	7.06441	1.60836	-3.88068	1.46402	-59.6949	-156.089	-198.69
36.3	1.64135	8.89546	-1.4434	-2.04962	4.2106	-62.4414	-154.258	-201.437
36.35	3.16723	5.8437	-2.35893	-0.523746	1.7692	-62.1363	-154.563	-198.69
36.4	0.725823	5.53853	-0.527872	2.22284	-0.367036	-57.2535	-155.784	-199.3
36.45	4.08276	7.97994	0.08248	-1.1341	-0.672212	-62.1363	-152.427	-201.742
36.5	-0.800055	7.36958	-2.96928	-1.74445	1.7692	-60.6104	-155.479	-198.995
36.55	0.115472	4.623	-0.222696	-0.828922	2.68472	-57.8638	-154.258	-197.775
36.6	1.64135	6.75923	3.13424	4.05389	-0.367036	-62.4414	-151.817	-201.437
36.65	-1.71558	9.50581	-0.833047	1.61248	-0.672212	-59.6949	-154.563	-199.3
36.7	0.420648	6.14888	-1.13822	-1.1341	0.548492	-60.3052	-156.089	-197.775
36.75	-1.41041	5.8437	2.52389	-0.523746	2.68472	-62.1363	-150.901	-200.216
36.8	-2.32593	8.59029	2.82906	2.22284	2.07437	-58.7793	-154.258	-198.69
36.85	2.2517	8.28511	-2.05375	2.22284	-0.977387	-62.1363	-156.089	-196.554
36.9	-1.41041	5.53853	-0.222696	-0.523746	-1.28256	-56.6431	-153.343	-200.826
36.95	0.420648	6.14888	3.13424	-1.1341	-1.89291	-60.9156	-154.868	-200.216
37	3.47241	9.81099	0.08248	-0.828922	-0.977387	-58.169	-156.394	-195.638
37.05	-0.189704	8.28511	-1.74857	1.30731	-1.28256	-60	-153.037	-199.911
37.1	3.47241	7.97994	0.692832	1.91766	-4.02914	-58.4742	-153.343	-199.3
37.15	3.77758	8.28511	3.13424	-0.523746	-3.72397	-56.6431	-155.784	-195.638
37.2	2.55688	11.3369	-1.4434	-0.523746	-2.50327	-59.3897	-153.343	-197.775
37.25	6.21899	6.14888	-1.13822	1.00213	-0.977387	-56.3379	-150.901	-197.164
37.3	2.86205	5.8437	0.387656	3.13836	-5.8602	-59.0845	-154.868	-195.638
37.35	1.94653	6.75923	0.387656	3.13836	-5.24985	-54.2017	-153.037	-193.807
37.4	5.91381	7.67476	-3.57963	0.391781	-0.977387	-60	-148.155	-195.943
37.45	-0.189704	5.8437	-2.6641	1.30731	-5.24985	-54.5069	-153.343	-193.502
37.5	0.115472	4.31783	-0.222696	1.61248	-4.02914	-59.0845	-153.037	-189.535
37.55	4.38793	6.45406	-1.74857	3.74871	-0.672212	-54.812	-150.291	-194.723
37.6	-0.49488	6.75923	-3.57963	3.44354	-3.11362	-56.9483	-153.037	-192.892
37.65	-0.189704	4.01265	-2.6641	-0.523746	-3.72397	-55.7276	-155.174	-189.23
37.7	2.55688	4.623	-0.527872	-2.3548	0.243316	-53.8965	-153.343	-191.366
37.75	-0.189704	6.14888	-1.4434	-2.04962	-3.41879	-56.0327	-152.427	-192.892
37.8	1.33617	6.75923	-3.27445	1.30731	1.15884	-50.8448	-156.394	-191.061
37.85	2.86205	2.79195	-2.35893	0.696957	-2.19809	-57.2535	-154.868	-187.399
37.9	-0.49488	4.01265	0.998007	-2.96515	-1.89291	-54.812	-152.122	-191.366
37.95	2.2517	6.45406	-2.35893	-2.04962	0.853667	-54.5069	-155.479	-191.061
38	3.47241	6.14888	-2.96928	1.00213	-0.977387	-55.7276	-154.563	-185.873
38.05	0.420648	2.1816	-2.6641	3.13836	2.68472	-51.7603	-151.512	-188.009
38.1	2.86205	2.79195	0.692832	-0.828922	-2.19809	-56.9483	-150.901	-189.535
38.15	4.38793	4.31783	-0.527872	0.391781	2.07437	-54.5069	-153.648	-187.704
38.2	0.725823	4.31783	-3.27445	3.74871	-3.72397	-56.0327	-150.291	-184.347
38.25	3.16723	0.960892	-1.74857	1.30731	0.243316	-58.4742	-146.324	-188.924
38.3	4.08276	0.960892	0.387656	1.91766	-4.02914	-53.8965	-150.291	-187.704
38.35	1.33617	1.26607	0.08248	5.57977	-1.89291	-57.5586	-149.07	-186.788
38.4	2.55688	4.31783	-2.96928	1.30731	-3.11362	-56.3379	-146.629	-186.178
38.45	4.99828	1.57124	-2.35893	1.91766	-3.11362	-52.981	-144.798	-188.314
38.5	0.115472	1.87642	0.692832	5.27459	-1.89291	-56.6431	-148.155	-186.788
38.55	0.725823	3.09712	0.08248	0.086605	-4.6395	-53.5913	-149.07	-183.736
38.6	5.91381	4.92818	-3.88481	4.05389	1.15884	-54.2017	-144.187	-185.262
38.65	-0.189704	6.14888	-2.96928	0.696957	-3.11362	-55.4224	-148.46	-187.399
38.7	1.031	3.09712	0.387656	1.30731	1.7692	-52.6758	-149.68	-187.093
38.75	5.30346	3.4023	-4.80033	0.086605	-3.11362	-54.812	-148.46	-182.821
38.8	1.031	5.23335	-4.80033	-1.74445	0.243316	-54.812	-145.713	-187.093
38.85	1.94653	8.28511	-0.833047	2.83319	-0.977387	-49.3189	-148.765	-187.399
38.9	6.21899	4.01265	-6.02104	-1.74445	-0.367036	-54.812	-150.596	-186.788
38.95	4.08276	2.1816	-3.57963	3.13836	2.9899	-52.6758	-147.849	-182.821
39	2.86205	3.4023	-3.88481	-1.1341	-0.977387	-49.6241	-147.239	-185.873
39.05	6.52416	4.31783	-3.88481	1.61248	3.90543	-54.5069	-150.596	-187.399
39.1	5.91381	5.53853	0.998007	-0.523746	0.243316	-52.981	-149.68	-185.262
39.15	1.64135	1.26607	-3.27445	1.30731	-0.06186	-52.0655	-148.155	-183.126
39.2	4.08276	-0.259811	1.30318	1.00213	2.37955	-53.8965	-146.324	-186.483
39.25	6.82934	-1.48052	-6.02104	-0.218571	-1.58774	-51.1499	-151.206	-188.619
39.3	1.94653	0.045364	-2.05375	2.83319	0.853667	-51.7603	-149.375	-187.399
39.35	1.94653	0.960892	-4.80033	0.086605	-0.977387	-53.8965	-148.46	-183.736
39.4	5.60864	-2.70122	-3.88481	3.44354	-1.58774	-50.5396	-146.018	-184.652
39.45	4.38793	-3.00639	-5.71586	-0.523746	3.60025	-51.7603	-150.291	-185.873
39.5	3.16723	-2.70122	-4.80033	3.44354	-2.19809	-52.0655	-150.901	-185.873
39.55	4.38793	-0.259811	-5.10551	0.391781	0.243316	-51.7603	-148.46	-181.6
39.6	5.91381	2.48677	-4.80033	0.086605	0.548492	-52.3706	-146.018	-180.685
39.65	1.94653	0.35054	-5.10551	2.52801	-1.28256	-55.4224	-150.291	-182.821
39.7	4.08276	-0.870163	-3.27445	-0.218571	2.68472	-53.8965	-149.68	-181.905
39.75	7.74487	0.045364	-3.27445	2.52801	-0.367036	-56.3379	-147.544	-179.464
39.8	3.47241	1.57124	-3.27445	-1.1341	-0.672212	-58.169	-145.103	-177.328
39.85	1.64135	4.01265	-3.88481	-1.43927	1.46402	-55.7276	-147.239	-182.211
39.9	3.47241	1.57124	-3.88481	3.13836	-2.50327	-56.6431	-148.765	-181.905
39.95	4.99828	-0.259811	-2.6641	-1.1341	-2.19809	-58.4742	-146.324	-180.685
40	-0.189704	0.655716	-4.49516	4.35907	-0.06186	-55.7276	-143.272	-178.854
40.05	0.725823	1.26607	-2.35893	2.22284	-4.02914	-54.2017	-143.882	-180.38
40.1	3.47241	2.79195	-4.80033	2.22284	-1.28256	-56.9483	-146.934	-183.126
40.15	2.55688	1.26607	-0.833047	6.80047	0.548492	-54.2017	-146.018	-180.99
40.2	0.115472	-0.564987	-3.88481	2.22284	-4.33432	-52.6758	-145.103	-178.854
40.25	1.031	-0.564987	-0.222696	2.22284	-1.89291	-56.6431	-142.661	-176.412
40.3	5.91381	1.87642	-5.41068	4.05389	-2.19809	-54.5069	-145.408	-179.159
40.35	2.86205	2.79195	0.692832	-1.1341	-4.02914	-52.0655	-147.849	-181.6
40.4	1.94653	-0.564987	-4.49516	1.00213	-2.19809	-56.6431	-145.713	-180.685
40.45	3.16723	0.960892	-1.4434	-0.218571	-4.02914	-56.3379	-142.967	-178.548
40.5	6.52416	4.92818	-2.35893	-2.04962	-4.33432	-51.4551	-141.746	-176.412
40.55	3.16723	-0.564987	-0.527872	1.91766	-0.977387	-56.6431	-144.798	-180.38
40.6	3.47241	0.045364	2.21871	-1.1341	-4.94467	-57.2535	-146.018	-181.6
40.65	4.99828	4.31783	-1.4434	-2.04962	-5.24985	-53.5913	-143.577	-180.99
40.7	6.82934	-0.259811	2.21871	1.91766	-2.50327	-55.4224	-140.83	-179.464
40.75	2.55688	0.655716	-1.74857	-2.04962	-6.16538	-56.3379	-142.661	-176.107
40.8	3.47241	0.655716	0.387656	-1.1341	-7.38608	-55.1172	-144.187	-178.548
40.85	4.08276	-1.78569	-1.4434	2.22284	-3.72397	-54.812	-144.492	-178.243
40.9	6.82934	2.48677	-2.96928	-2.65998	-6.77573	-58.169	-142.051	-177.328
40.95	3.77758	-2.39604	0.692832	-2.3548	-7.69125	-56.0327	-138.694	-173.971
41	3.16723	0.045364	-4.18998	1.61248	-3.11362	-53.5913	-137.168	-172.445
41.05	4.69311	0.35054	-0.222696	-3.27033	-7.99643	-56.6431	-139.61	-175.192
41.1	6.21899	-0.870163	-2.05375	-2.96515	-8.91196	-57.2535	-138.694	-174.276
41.15	3.47241	1.87642	-2.96928	1.00213	-5.8602	-53.2862	-138.389	-171.529
41.2	3.16723	-1.17534	1.60836	-3.88068	-7.99643	-52.981	-135.948	-172.445
41.25	4.08276	2.1816	-3.88481	-3.27033	-9.82748	-56.0327	-135.032	-174.581
41.3	6.52416	-3.31157	-2.35893	0.086605	-7.69125	-53.8965	-138.999	-172.14
41.35	4.08276	1.26607	-3.88481	-4.49103	-7.38608	-51.1499	-141.441	-173.055
41.4	3.16723	-3.61674	-4.80033	-0.828922	-10.4378	-55.7276	-140.83	-175.497
41.45	4.38793	-1.78569	-0.833047	2.22284	-8.30161	-56.6431	-139.305	-173.971
41.5	7.43969	-0.870163	-6.32621	-2.3548	-7.99643	-53.8965	-136.863	-176.107
41.55	5.30346	-1.78569	-4.49516	-0.523746	-11.0482	-52.6758	-139.61	-178.548
41.6	2.2517	2.48677	-3.57963	2.52801	-7.99643	-55.7276	-141.746	-173.971
41.65	2.55688	-1.48052	-4.80033	-1.43927	-6.16538	-54.5069	-139.61	-178.548
41.7	2.86205	4.92818	0.692832	-0.523746	-10.743	-50.8448	-138.389	-174.886
41.75	5.60864	0.045364	-2.96928	2.83319	-9.21713	-53.5913	-137.168	-177.938
41.8	1.94653	1.26607	-3.27445	-2.04962	-4.94467	-53.5913	-135.337	-177.328
41.85	1.64135	1.57124	-0.222696	-2.3548	-8.30161	-52.6758	-136.863	-174.581
41.9	2.86205	0.960892	-2.96928	1.30731	-7.38608	-49.3189	-138.389	-175.802
41.95	5.30346	6.45406	-0.833047	-3.88068	-4.02914	-54.812	-138.084	-171.224
42	5.91381	1.87642	-2.05375	-4.18586	-5.8602	-53.5913	-137.779	-174.886
42.05	1.64135	4.92818	-3.27445	1.61248	-8.30161	-50.8448	-136.253	-170.004
42.1	1.031	4.01265	0.387656	-0.523746	-6.77573	-49.9292	-134.117	-174.276
42.15	3.16723	3.09712	-5.41068	-2.3548	-4.94467	-53.2862	-135.948	-170.004
42.2	4.38793	7.06441	-4.18998	1.00213	-7.99643	-52.3706	-138.389	-175.192
42.25	3.47241	1.57124	-0.222696	2.22284	-7.69125	-50.5396	-137.779	-172.14
42.3	1.031	1.87642	-4.80033	-1.1341	-3.72397	-50.2344	-137.168	-174.276
42.35	1.031	6.14888	-2.05375	1.00213	-7.38608	-53.5913	-136.253	-173.666
42.4	2.2517	0.655716	-2.6641	2.52801	-7.0809	-52.981	-135.642	-174.276
42.45	4.99828	2.1816	-4.18998	-2.96515	-4.33432	-51.1499	-135.032	-175.192
42.5	3.16723	3.09712	-0.833047	-1.43927	-3.41879	-50.2344	-137.473	-172.14
42.55	-0.800055	1.87642	-3.57963	1.61248	-6.77573	-53.8965	-138.999	-175.497
42.6	-0.189704	5.53853	-4.49516	-2.04962	-6.77573	-51.7603	-138.389	-170.919
42.65	1.64135	3.4023	0.08248	-2.96515	-2.19809	-49.3189	-136.863	-176.412
42.7	2.2517	4.01265	-4.18998	-1.1341	-4.94467	-47.1827	-134.117	-172.75
42.75	-1.10523	7.97994	-2.6641	-1.1341	-6.47055	-50.5396	-137.473	-174.581
42.8	-3.24146	4.31783	0.387656	-5.10138	-4.02914	-50.2344	-137.473	-175.802
42.85	-1.71558	5.23335	-3.57963	-5.10138	-1.58774	-48.7085	-134.727	-171.529
42.9	1.33617	9.81099	-2.05375	-1.1341	-5.55502	-45.6568	-133.201	-176.717
42.95	-3.54664	4.92818	0.387656	-4.79621	-5.55502	-49.9292	-136.253	-173.971
43	-3.85181	5.53853	-4.18998	-6.01691	-4.33432	-49.9292	-134.422	-174.886
43.05	-1.71558	9.50581	-2.96928	-4.18586	-2.50327	-49.6241	-130.149	-176.412
43.1	-0.800055	4.01265	-0.222696	-2.04962	-4.6395	-47.4878	-132.591	-171.529
43.15	-3.24146	6.14888	-3.57963	-4.49103	-4.02914	-51.1499	-132.285	-176.412
43.2	1.031	9.20064	-1.4434	-3.5755	0.548492	-53.2862	-127.708	-173.055
43.25	-1.10523	4.92818	-0.222696	-0.218571	-0.367036	-51.7603	-132.896	-173.36
43.3	-1.10523	4.31783	-4.18998	-2.3548	-1.89291	-49.9292	-130.76	-174.886
43.35	3.77758	8.28511	-1.13822	-3.27033	-0.367036	-49.0137	-128.929	-171.529
43.4	-1.71558	3.4023	0.692832	-0.523746	3.90543	-51.7603	-131.98	-175.192
43.45	1.94653	3.4023	-2.35893	1.00213	1.15884	-50.2344	-128.623	-176.107
43.5	-0.49488	6.45406	-0.527872	-2.96515	-0.672212	-49.0137	-132.896	-170.919
43.55	-0.189704	2.1816	0.387656	-2.65998	-0.06186	-46.2671	-130.454	-174.581
43.6	1.031	3.4023	-2.6641	-0.218571	2.9899	-49.0137	-128.013	-173.055
43.65	-1.71558	7.06441	-1.74857	0.391781	-0.977387	-51.4551	-130.454	-171.835
43.7	4.38793	4.31783	0.692832	-3.88068	-2.19809	-51.1499	-125.266	-175.192
43.75	-0.800055	5.23335	-3.57963	-3.27033	-1.58774	-49.6241	-131.065	-171.529
43.8	4.38793	8.28511	-2.6641	-0.828922	0.243316	-47.4878	-127.708	-173.055
43.85	-0.800055	5.53853	-1.13822	-0.828922	-1.58774	-49.6241	-127.403	-174.276
43.9	2.2517	6.14888	-6.32621	-5.10138	-3.72397	-50.8448	-130.149	-170.309
43.95	1.031	8.89546	-4.49516	-2.96515	-2.19809	-50.2344	-124.961	-173.971
44	2.86205	6.14888	-1.13822	-0.828922	0.548492	-49.0137	-130.149	-173.36
44.05	2.55688	4.92818	-6.32621	0.696957	-0.06186	-47.1827	-125.877	-168.478
44.1	1.94653	6.45406	-5.41068	-2.65998	-4.33432	-49.6241	-130.149	-172.75
44.15	4.38793	5.8437	-1.4434	-2.96515	-3.11362	-52.0655	-129.844	-171.529
44.2	1.031	3.09712	-3.57963	-0.523746	-0.06186	-52.0655	-124.656	-166.647
44.25	5.30346	6.45406	-3.27445	0.696957	0.243316	-50.5396	-128.318	-169.698
44.3	-0.189704	7.36958	-2.6641	-3.88068	-2.80844	-47.1827	-126.182	-169.088
44.35	4.38793	3.4023	-2.96928	-2.65998	-2.19809	-48.7085	-126.487	-166.341
44.4	-0.800055	4.92818	-6.02104	-0.218571	-0.672212	-50.5396	-125.877	-171.224
44.45	0.725823	8.59029	-3.88481	1.00213	2.07437	-48.7085	-121.604	-170.614
44.5	1.031	4.92818	-2.35893	-2.65998	-0.06186	-45.6568	-125.877	-169.393
44.55	2.2517	4.92818	-5.41068	-2.96515	-1.28256	-48.7085	-125.572	-173.971
44.6	5.91381	8.28511	-3.88481	-0.218571	-0.367036	-49.3189	-121.604	-172.14
44.65	2.2517	7.97994	0.387656	2.22284	0.243316	-47.793	-126.792	-168.172
44.7	4.69311	6.45406	-3.57963	-2.04962	2.68472	-45.9619	-124.656	-171.835
44.75	4.69311	8.89546	-3.57963	-3.27033	-1.28256	-48.4034	-123.13	-169.393
44.8	2.86205	10.7265	0.08248	-2.96515	-1.58774	-46.5723	-127.097	-166.647
44.85	8.96557	7.36958	0.387656	0.391781	-0.977387	-46.5723	-125.877	-170.309
44.9	3.16723	7.06441	-2.35893	-0.523746	1.7692	-48.0982	-125.266	-167.257
44.95	4.38793	10.1162	-1.74857	-2.96515	0.853667	-42.9102	-129.234	-165.731
45	5.30346	7.67476	1.30318	-3.88068	-1.89291	-47.4878	-127.097	-168.783
45.05	1.64135	4.31783	-2.05375	-1.43927	-0.977387	-45.9619	-125.266	-167.257
45.1	4.08276	6.14888	-2.05375	0.696957	-1.58774	-45.0464	-129.844	-164.205
45.15	1.33617	7.67476	-0.833047	-2.04962	2.37955	-47.793	-128.929	-169.088
45.2	1.33617	3.09712	0.387656	-3.27033	0.853667	-41.0791	-127.708	-168.172
45.25	4.69311	1.87642	-3.27445	-2.96515	-2.50327	-46.5723	-131.065	-162.374
45.3	-0.189704	5.23335	-2.35893	-0.828922	-2.50327	-42.2998	-130.149	-167.867
45.35	1.94653	4.92818	0.387656	-0.828922	-2.50327	-46.8775	-127.403	-167.867
45.4	3.77758	2.1816	-1.13822	-3.88068	-0.06186	-45.6568	-131.675	-164.816
45.45	0.420648	3.4023	-2.96928	-3.27033	-0.672212	-45.0464	-129.844	-167.257
45.5	2.55688	6.75923	-1.74857	-2.65998	-3.41879	-46.2671	-125.877	-167.257
45.55	2.55688	4.92818	1.60836	-1.74445	-3.11362	-43.5205	-128.929	-165.121
45.6	0.115472	4.31783	-2.35893	-0.828922	-0.977387	-46.5723	-128.623	-165.121
45.65	4.38793	3.70747	-2.35893	-3.27033	-1.28256	-42.605	-124.351	-168.172
45.7	1.33617	6.45406	-0.222696	-2.96515	-4.02914	-46.8775	-124.656	-165.731
45.75	0.115472	1.87642	0.998007	-2.65998	-2.80844	-42.2998	-125.572	-163.595
45.8	4.99828	1.87642	-3.57963	-1.74445	-2.19809	-47.1827	-122.52	-166.952
45.85	0.115472	1.26607	-4.18998	-1.1341	-4.6395	-43.8257	-123.435	-166.952
45.9	0.725823	3.70747	-2.35893	-4.18586	-1.58774	-48.4034	-124.046	-162.374
45.95	4.08276	-0.259811	-0.833047	-4.79621	-2.50327	-45.3516	-122.215	-166.647
46	1.031	-0.870163	-4.49516	-5.10138	-4.6395	-45.6568	-119.773	-167.562
46.05	1.94653	0.960892	-5.10551	-3.27033	0.243316	-45.9619	-124.656	-166.036
46.1	5.30346	3.70747	-2.35893	-2.65998	-3.11362	-41.9947	-123.13	-163.9
46.15	-0.800055	-0.259811	0.08248	-5.71174	-2.80844	-45.0464	-119.163	-167.867
46.2	0.115472	0.960892	-3.88481	-7.23761	-1.28256	-42.2998	-123.13	-167.562
46.25	4.08276	3.09712	-2.96928	-6.01691	-2.50327	-45.9619	-123.741	-163.595
46.3	-1.10523	5.53853	-0.222696	-1.1341	2.37955	-43.8257	-121.909	-166.952
46.35	0.115472	1.87642	1.91353	-3.27033	-2.80844	-43.5205	-120.689	-166.647
46.4	4.08276	2.1816	-1.74857	-4.49103	0.853667	-45.9619	-124.656	-164.816
46.45	-1.10523	4.01265	-2.6641	-2.3548	-1.58774	-42.9102	-123.741	-164.51
46.5	1.33617	5.8437	-0.527872	1.61248	0.548492	-47.4878	-120.689	-167.562
46.55	5.30346	3.70747	2.52389	-1.74445	-0.672212	-47.4878	-124.961	-166.952
46.6	1.33617	2.1816	-1.13822	0.086605	-0.06186	-43.2154	-126.182	-162.679
46.65	2.2517	2.48677	-2.35893	3.74871	1.7692	-46.5723	-124.046	-166.036
46.7	6.82934	4.92818	-1.4434	-2.3548	-0.367036	-43.8257	-122.52	-166.036
46.75	2.55688	2.79195	2.52389	1.00213	3.29507	-44.7412	-125.877	-163.9
46.8	1.94653	0.35054	0.998007	2.52801	-0.977387	-45.0464	-124.961	-161.764
46.85	7.43969	0.960892	-2.05375	-0.828922	4.2106	-39.8584	-121.299	-166.036
46.9	1.94653	2.48677	-0.527872	2.83319	-0.672212	-44.1309	-123.13	-165.426
46.95	1.64135	4.01265	2.52389	-2.3548	4.51578	-43.2154	-123.435	-162.374
47	5.60864	0.35054	-1.4434	-1.74445	-2.19809	-40.774	-121.604	-160.848
47.05	1.94653	0.655716	-3.27445	-1.1341	0.548492	-45.9619	-117.942	-165.121
47.1	1.94653	1.57124	0.998007	-3.27033	-0.367036	-45.0464	-121.299	-165.731
47.15	4.99828	4.92818	-3.27445	1.61248	-1.58774	-43.5205	-120.994	-163.9
47.2	2.86205	4.01265	-2.96928	-3.27033	1.15884	-46.8775	-118.858	-162.374
47.25	1.031	0.960892	-0.222696	1.30731	-2.80844	-44.1309	-115.806	-165.121
47.3	2.55688	2.1816	-4.80033	-4.49103	1.15884	-45.6568	-120.689	-165.121
47.35	4.08276	1.87642	0.08248	-2.04962	-2.80844	-46.2671	-118.858	-161.459
47.4	1.33617	4.623	-1.74857	-4.18586	-1.58774	-42.605	-116.416	-159.933
47.45	2.2517	2.48677	-2.6641	-2.96515	-0.367036	-45.6568	-115.196	-161.153
47.5	5.91381	-0.564987	0.08248	-2.65998	-2.80844	-45.9619	-119.163	-159.322
47.55	1.031	-0.259811	-2.96928	-4.18586	2.9899	-40.774	-118.553	-156.271
47.6	1.64135	1.57124	1.30318	-0.218571	-1.58774	-45.3516	-115.806	-155.66
47.65	3.77758	5.53853	-2.05375	-3.88068	-0.977387	-44.1309	-115.196	-158.407
47.7	2.86205	3.09712	2.21871	1.30731	0.853667	-39.8584	-118.858	-158.712
47.75	1.031	0.960892	-0.833047	-2.96515	-1.89291	-44.1309	-118.553	-156.576
47.8	1.94653	2.48677	3.74459	2.22284	2.07437	-42.2998	-116.111	-155.05
47.85	3.47241	4.01265	-0.527872	-1.1341	-2.50327	-39.2481	-113.975	-159.322
47.9	-0.800055	7.36958	2.82906	0.086605	-2.50327	-43.2154	-118.858	-159.628
47.95	0.725823	5.23335	-1.13822	1.91766	2.07437	-41.9947	-118.247	-158.407
48	4.38793	2.1816	3.74459	1.00213	-3.41879	-38.0274	-117.027	-156.881
48.05	2.55688	2.48677	-1.13822	5.27459	-2.50327	-43.2154	-113.975	-159.933
48.1	1.031	3.4023	2.82906	-1.43927	-0.367036	-41.6895	-116.721	-161.153
48.15	3.16723	6.45406	-2.6641	1.00213	-3.11362	-38.3326	-117.027	-160.238
48.2	5.60864	5.53853	1.91353	1.61248	1.46402	-42.605	-116.416	-156.576
48.25	1.94653	2.48677	-1.4434	-0.218571	-0.367036	-41.3843	-112.449	-157.186
48.3	2.2517	2.1816	2.82906	2.83319	-0.06186	-37.1119	-116.721	-160.848
48.35	4.08276	1.87642	-2.35893	-0.218571	4.82095	-40.4688	-119.468	-160.238
48.4	3.47241	3.09712	0.08248	0.391781	-0.06186	-39.2481	-120.078	-159.322
48.45	0.725823	3.4023	-3.88481	4.35907	1.15884	-35.8911	-116.721	-156.271
48.5	0.420648	1.87642	-1.4434	1.00213	4.2106	-39.5533	-116.416	-158.407
48.55	5.30346	0.960892	-3.27445	2.83319	-0.977387	-38.6377	-120.689	-160.238
48.6	2.2517	1.87642	-4.18998	3.74871	-0.06186	-34.3653	-119.163	-159.628
48.65	1.031	4.92818	-3.27445	1.30731	1.46402	-37.7222	-117.332	-155.965
48.7	1.031	2.1816	-6.32621	4.66424	-4.6395	-36.8067	-114.28	-154.44
48.75	3.47241	3.09712	-3.57963	-0.828922	-1.89291	-34.3653	-116.111	-159.017
48.8	-0.800055	5.53853	-9.07279	-2.04962	-0.672212	-37.1119	-116.721	-158.407
48.85	-1.71558	4.31783	-3.88481	2.83319	-3.72397	-37.417	-116.416	-158.712
48.9	-0.189704	3.09712	-7.54692	-2.96515	-0.672212	-36.1963	-114.585	-156.271
48.95	1.94653	6.14888	-5.41068	-1.74445	0.243316	-36.1963	-112.754	-155.965
49	-2.02076	5.23335	-5.10551	1.00213	-0.367036	-39.2481	-116.416	-159.933
49.05	-1.10523	4.01265	-4.80033	-2.04962	3.29507	-38.0274	-116.416	-160.848
49.1	1.64135	7.97994	-0.833047	1.00213	2.68472	-36.5015	-115.806	-160.238
49.15	2.55688	4.01265	-5.41068	2.22284	0.243316	-41.3843	-112.754	-158.102
49.2	-0.189704	6.14888	-2.05375	-0.828922	2.37955	-40.1636	-112.144	-157.796
49.25	-0.49488	6.14888	-4.49516	2.22284	1.46402	-35.586	-115.196	-161.153
49.3	1.031	4.01265	-3.57963	2.52801	-0.672212	-40.4688	-114.89	-159.628
49.35	2.55688	9.20064	0.692832	0.391781	1.46402	-40.774	-114.28	-158.102
49.4	-0.49488	3.70747	-4.18998	1.30731	0.853667	-37.7222	-112.449	-156.576
49.45	-0.189704	6.75923	0.08248	0.391781	-0.672212	-36.1963	-110.923	-159.628
49.5	0.115472	4.31783	-3.57963	-2.3548	1.46402	-39.2481	-113.365	-159.322
49.55	2.86205	4.01265	-2.6641	0.391781	1.46402	-37.7222	-114.585	-156.271
49.6	-0.49488	6.45406	-0.527872	-2.65998	-1.28256	-34.3653	-113.67	-158.407
49.65	-1.10523	4.01265	-3.27445	-4.49103	2.37955	-39.2481	-112.449	-159.628
49.7	-0.189704	7.67476	0.998007	-1.1341	3.29507	-38.6377	-110.008	-157.796
49.75	3.47241	4.31783	-2.35893	-2.96515	-0.06186	-37.7222	-111.228	-158.407
49.8	1.94653	9.81099	-1.4434	-4.79621	2.68472	-36.5015	-112.754	-159.017
49.85	-1.10523	4.623	1.60836	-1.74445	3.90543	-40.1636	-112.754	-155.355
49.9	-1.10523	6.75923	-1.4434	-1.74445	0.548492	-39.2481	-110.008	-159.322
49.95	0.420648	5.23335	0.998007	-2.65998	0.853667	-36.1963	-108.787	-156.576
50	1.64135	6.14888	-1.13822	1.30731	3.29507	-39.8584	-107.566	-156.881
50.05	-1.71558	8.28511	-2.05375	0.696957	-1.28256	-39.5533	-111.534	-158.407
50.1	-2.93629	4.31783	1.60836	-1.1341	-0.367036	-38.0274	-112.754	-153.524
50.15	-2.02076	9.20064	-3.27445	1.91766	3.60025	-35.586	-111.839	-156.881
50.2	0.420648	4.92818	-1.4434	2.52801	0.548492	-40.1636	-112.144	-152.609
50.25	-0.189704	6.14888	-0.833047	0.086605	-0.06186	-38.6377	-109.092	-157.796
50.3	-2.63111	6.45406	-3.57963	2.22284	2.68472	-35.8911	-109.702	-155.355
50.35	-2.63111	4.01265	-0.527872	3.74871	4.2106	-35.8911	-112.449	-156.271
50.4	-1.41041	10.4213	-4.49516	-1.1341	0.243316	-39.5533	-113.975	-155.965
50.45	0.725823	5.23335	-5.10551	-0.828922	2.07437	-40.1636	-112.144	-155.66
50.5	0.420648	7.67476	-1.74857	2.52801	5.73648	-37.417	-112.144	-156.881
50.55	-1.41041	9.50581	-5.10551	-1.43927	0.853667	-39.2481	-111.228	-154.134
50.6	-1.10523	6.45406	-3.88481	-1.74445	0.853667	-42.9102	-111.228	-156.576
50.65	-0.189704	9.50581	-2.35893	2.22284	4.2106	-41.9947	-113.67	-151.388
50.7	2.2517	7.97994	-5.41068	0.391781	2.9899	-38.9429	-116.721	-156.576
50.75	-0.49488	5.23335	-2.6641	-0.523746	0.853667	-41.0791	-115.806	-152.609
50.8	-1.71558	10.1162	-3.27445	2.52801	2.68472	-44.7412	-114.585	-157.186
50.85	-0.49488	5.8437	-5.10551	3.44354	4.51578	-43.8257	-113.67	-154.745
50.9	1.031	6.45406	-0.833047	0.086605	0.548492	-39.8584	-111.839	-157.796
50.95	2.55688	8.89546	-4.80033	1.00213	0.548492	-41.6895	-114.89	-158.407
51	1.33617	4.31783	-4.18998	3.44354	4.51578	-44.4361	-114.89	-155.05
51.05	-2.32593	7.06441	0.998007	0.391781	2.07437	-44.7412	-115.501	-158.712
51.1	-1.10523	7.06441	-4.49516	0.086605	0.853667	-40.774	-113.67	-154.44
51.15	0.725823	3.09712	-2.96928	4.05389	2.37955	-41.0791	-113.67	-158.712
51.2	0.115472	5.8437	-0.222696	1.91766	4.2106	-44.1309	-117.637	-155.355
51.25	-3.54664	5.8437	-4.18998	0.086605	1.15884	-42.2998	-115.806	-155.355
51.3	-4.15699	4.31783	-3.27445	0.391781	0.548492	-39.2481	-112.754	-156.881
51.35	0.725823	7.06441	0.08248	3.13836	3.29507	-37.7222	-116.721	-152.609
51.4	-3.85181	6.14888	-3.27445	0.696957	4.51578	-40.4688	-117.637	-156.881
51.45	-3.54664	3.70747	-0.833047	-0.218571	1.15884	-40.774	-113.975	-155.05
51.5	1.031	7.97994	0.387656	1.61248	2.68472	-38.0274	-117.332	-152.303
51.55	-3.54664	5.53853	-3.27445	0.696957	5.12613	-35.586	-118.247	-155.965
51.6	-1.71558	4.01265	-0.222696	-2.65998	5.12613	-38.9429	-111.228	-152.609
51.65	0.420648	8.59029	1.30318	-0.828922	1.7692	-41.6895	-116.721	-156.881
51.7	-3.24146	5.8437	-2.05375	1.91766	1.46402	-41.0791	-112.754	-157.796
51.75	1.33617	4.92818	0.08248	-1.43927	4.82095	-37.7222	-113.365	-155.355
51.8	-2.93629	7.97994	0.998007	-1.74445	2.68472	-37.7222	-115.196	-161.459
51.85	-0.800055	5.53853	-2.35893	-0.218571	0.243316	-40.774	-108.482	-158.102
51.9	-1.71558	4.623	0.387656	3.44354	0.853667	-40.4688	-113.059	-156.576
51.95	-3.24146	7.97994	0.998007	-2.65998	3.60025	-38.6377	-110.923	-159.933
52	1.64135	6.14888	-1.74857	-2.04962	2.37955	-35.586	-110.618	-156.271
52.05	-2.02076	4.92818	0.387656	0.391781	-0.672212	-38.6377	-111.839	-153.829
52.1	2.86205	7.06441	2.82906	0.391781	-0.367036	-41.0791	-106.04	-154.745
52.15	-2.93629	7.36958	-2.05375	-3.27033	2.07437	-40.774	-109.702	-151.083
52.2	1.64135	5.53853	0.387656	-3.27033	2.37955	-37.417	-105.43	-152.609
52.25	-2.32593	7.97994	4.04976	0.086605	-0.367036	-34.0601	-109.702	-153.524
52.3	-0.189704	8.59029	-1.4434	0.391781	0.243316	-38.0274	-109.702	-148.031
52.35	-0.49488	4.31783	-0.833047	-2.96515	3.29507	-38.6377	-108.787	-151.998
52.4	-2.32593	6.45406	3.13424	-2.65998	3.60025	-38.0274	-113.059	-152.914
52.45	1.031	7.36958	-1.13822	0.391781	0.853667	-36.1963	-108.177	-148.031
52.5	-0.800055	2.79195	-2.05375	0.391781	1.15884	-33.7549	-113.365	-153.524
52.55	0.725823	2.79195	1.60836	-2.96515	4.2106	-37.1119	-112.449	-150.777
52.6	-0.800055	6.75923	-0.833047	-2.3548	5.73648	-37.7222	-110.313	-148.031
52.65	2.86205	1.87642	-2.96928	-0.523746	1.7692	-37.417	-113.365	-151.693
52.7	-2.63111	1.87642	-0.527872	0.391781	1.7692	-35.8911	-109.397	-149.252
52.75	-0.189704	4.92818	-0.222696	-2.04962	1.7692	-36.1963	-112.754	-146.505
52.8	-1.71558	5.23335	-4.18998	-2.65998	5.4313	-39.5533	-112.449	-151.388
52.85	-1.41041	3.09712	-1.74857	0.086605	2.37955	-39.8584	-108.482	-149.557
52.9	2.2517	4.623	0.998007	1.61248	-0.977387	-37.417	-112.754	-146.2
52.95	-2.02076	6.75923	-2.96928	-1.1341	-0.672212	-37.7222	-112.754	-150.472
53	2.55688	2.79195	-3.57963	-1.74445	1.7692	-41.0791	-107.261	-149.252
53.05	-1.71558	2.79195	0.387656	-0.828922	4.2106	-38.9429	-113.059	-147.421
53.1	-0.189704	7.06441	-1.74857	2.83319	0.853667	-36.5015	-111.228	-151.693
53.15	2.86205	2.48677	-2.96928	-0.828922	0.853667	-39.2481	-108.787	-149.252
53.2	-1.10523	1.26607	-0.527872	-2.04962	1.46402	-36.5015	-112.754	-146.505
53.25	2.86205	4.01265	-0.527872	-1.43927	4.82095	-35.586	-112.449	-150.167
53.3	0.420648	4.623	-4.18998	1.00213	4.51578	-37.417	-109.092	-147.421
53.35	-0.189704	0.960892	-2.96928	2.83319	1.15884	-32.229	-114.28	-144.369
53.4	3.77758	3.09712	-0.222696	0.696957	1.46402	-37.7222	-113.059	-148.946
53.45	-0.49488	6.75923	-1.4434	-0.523746	1.46402	-33.7549	-110.618	-149.252
53.5	1.64135	3.70747	-3.27445	0.696957	4.2106	-34.9756	-115.806	-144.369
53.55	2.55688	3.4023	0.387656	3.44354	3.29507	-35.8911	-112.754	-149.252
53.6	-1.10523	6.14888	3.13424	1.30731	-0.977387	-32.8394	-109.092	-149.557
53.65	2.55688	7.97994	-1.13822	-2.04962	-0.06186	-36.1963	-113.365	-146.505
53.7	1.33617	3.70747	-0.833047	0.086605	0.853667	-31.9239	-113.059	-150.472
53.75	-0.189704	4.92818	1.60836	2.22284	3.90543	-36.1963	-108.482	-149.557
53.8	4.69311	6.14888	1.30318	4.35907	0.548492	-31.9239	-113.059	-147.115
53.85	0.725823	7.36958	-1.13822	0.086605	-1.58774	-36.1963	-112.449	-148.031
53.9	2.2517	4.623	0.08248	0.391781	0.548492	-32.5342	-108.787	-150.472
53.95	5.30346	4.01265	3.74459	0.696957	2.9899	-33.1446	-112.144	-148.946
54	1.64135	7.97994	0.998007	2.22284	-0.06186	-32.5342	-113.67	-147.421
54.05	3.77758	5.23335	-1.4434	2.83319	-1.28256	-31.0083	-110.313	-150.472
54.1	3.77758	3.09712	-0.222696	0.696957	0.548492	-32.229	-111.839	-150.472
54.15	1.031	4.31783	2.82906	-0.828922	1.15884	-29.7876	-114.585	-146.505
54.2	4.08276	7.97994	-0.833047	0.391781	-2.19809	-34.6704	-112.754	-150.167
54.25	1.031	4.92818	-0.527872	2.83319	1.46402	-30.0928	-110.923	-151.083
54.3	0.115472	4.31783	0.998007	3.13836	-0.672212	-34.9756	-114.585	-148.946
54.35	3.16723	4.623	3.74459	0.696957	-1.28256	-31.6187	-112.754	-149.252
54.4	1.031	8.28511	-0.222696	-1.1341	3.90543	-35.8911	-107.566	-151.998
54.45	-0.800055	5.23335	-0.222696	0.696957	-1.28256	-35.2808	-110.618	-150.777
54.5	1.94653	4.92818	0.08248	1.61248	2.07437	-32.8394	-110.923	-148.031
54.55	-0.49488	5.53853	3.43941	4.05389	2.68472	-34.3653	-108.787	-152.609
54.6	-2.02076	7.97994	-1.4434	1.00213	1.46402	-30.0928	-108.787	-152.914
54.65	1.94653	4.92818	-1.13822	-0.218571	4.2106	-33.7549	-111.839	-150.167
54.7	-1.41041	4.01265	-0.833047	1.91766	0.853667	-32.229	-109.702	-150.777
54.75	-1.71558	4.623	1.91353	3.13836	6.65201	-30.0928	-107.566	-153.829
54.8	2.2517	7.06441	-0.833047	0.391781	1.7692	-33.1446	-111.839	-154.134
54.85	-1.10523	5.8437	-2.35893	0.696957	5.73648	-30.7032	-111.534	-149.862
54.9	-1.10523	3.09712	-1.4434	4.66424	1.46402	-34.3653	-109.092	-154.44
54.95	2.2517	2.48677	0.998007	0.696957	3.90543	-33.4497	-110.313	-155.355
55	0.725823	4.31783	0.692832	1.00213	1.7692	-30.7032	-112.754	-152.914
55.05	0.420648	4.01265	-0.527872	5.88495	2.9899	-36.1963	-112.144	-151.083
55.1	4.69311	1.57124	-0.527872	1.00213	2.68472	-32.5342	-109.092	-154.44
55.15	2.86205	1.57124	2.52389	2.22284	1.15884	-32.8394	-112.754	-155.66
55.2	1.33617	2.79195	0.998007	2.52801	3.90543	-34.3653	-112.754	-151.998
55.25	3.77758	5.53853	-0.527872	-0.218571	2.37955	-30.0928	-109.397	-150.167
55.3	1.64135	2.1816	1.60836	3.74871	5.12613	-34.3653	-108.787	-153.829
55.35	0.115472	1.26607	3.74459	-2.65998	-0.672212	-33.7549	-113.059	-152.914
55.4	2.2517	1.87642	-0.833047	-0.523746	4.2106	-29.7876	-111.534	-149.252
55.45	2.86205	5.53853	0.08248	-3.27033	-1.58774	-34.9756	-108.177	-150.472
55.5	-1.41041	3.4023	1.91353	-2.96515	-0.672212	-33.7549	-107.871	-152.609
55.55	0.115472	1.26607	-2.6641	-2.96515	-1.28256	-32.8394	-110.313	-150.472
55.6	3.16723	1.26607	0.998007	-5.10138	-1.58774	-36.8067	-109.702	-146.505
55.65	0.420648	1.87642	0.08248	0.086605	2.9899	-33.7549	-106.956	-148.031
55.7	1.64135	5.23335	0.08248	-2.65998	-1.58774	-35.2808	-109.092	-150.472
55.75	4.99828	2.1816	2.52389	1.30731	1.46402	-35.8911	-111.228	-148.336
55.8	1.94653	-0.259811	-1.74857	-2.04962	0.853667	-32.5342	-111.839	-146.2
55.85	1.33617	0.045364	3.13424	2.22284	0.548492	-34.3653	-109.092	-147.726
55.9	3.77758	2.1816	-1.4434	-0.828922	4.82095	-35.586	-110.618	-149.557
55.95	2.2517	5.8437	2.21871	1.30731	-0.06186	-31.3135	-113.059	-149.557
56	1.031	3.09712	-2.6641	0.086605	2.68472	-32.5342	-112.144	-148.336
56.05	2.2517	1.87642	0.387656	0.086605	2.37955	-33.7549	-108.177	-148.641
56.1	4.99828	2.1816	-2.05375	2.52801	1.46402	-29.4825	-108.787	-151.388
56.15	0.420648	4.92818	-0.833047	-0.218571	4.2106	-33.7549	-111.534	-151.083
56.2	-0.800055	6.75923	-2.05375	3.13836	0.243316	-33.4497	-109.702	-149.557
56.25	2.86205	4.92818	0.387656	0.391781	0.243316	-28.8721	-106.346	-148.031
56.3	1.33617	2.1816	-0.527872	1.00213	3.90543	-33.4497	-107.871	-151.083
56.35	-0.189704	2.1816	0.692832	1.00213	-1.28256	-33.7549	-110.313	-150.167
56.4	1.64135	2.79195	-0.222696	-2.04962	2.07437	-29.4825	-109.092	-149.252
56.45	4.38793	5.53853	0.08248	1.30731	2.07437	-33.1446	-107.566	-146.505
56.5	1.64135	4.92818	0.998007	-2.96515	-0.06186	-33.1446	-108.177	-149.252
56.55	2.86205	1.57124	1.91353	-0.523746	2.9899	-31.0083	-111.839	-150.472
56.6	5.30346	2.1816	1.60836	-0.828922	1.15884	-33.7549	-111.534	-150.472
56.65	2.55688	1.87642	1.30318	-2.65998	0.548492	-33.7549	-111.228	-149.557
56.7	-0.189704	4.01265	2.82906	1.00213	5.12613	-31.3135	-107.566	-148.641
56.75	0.115472	4.623	1.30318	-2.96515	0.853667	-34.3653	-111.228	-151.998
56.8	2.86205	2.1816	3.43941	-1.43927	1.15884	-36.8067	-112.754	-152.303
56.85	-1.41041	0.655716	0.08248	2.52801	5.12613	-34.0601	-111.534	-151.083
56.9	-1.10523	0.655716	3.13424	-2.04962	-0.367036	-35.2808	-107.871	-148.031
56.95	1.031	4.623	-0.527872	0.391781	0.853667	-37.7222	-106.956	-149.252
57	1.94653	1.57124	4.04976	1.61248	2.07437	-35.2808	-109.702	-151.693
57.05	-2.93629	0.960892	-1.4434	-2.04962	-1.28256	-34.0601	-108.482	-151.388
57.1	-1.10523	3.70747	0.692832	2.83319	2.07437	-36.8067	-106.04	-150.472
57.15	1.031	4.01265	-0.833047	0.086605	2.37955	-35.586	-103.599	-147.421
57.2	0.420648	-0.259811	-0.527872	-1.43927	-0.672212	-32.5342	-104.209	-149.252
57.25	-2.93629	2.48677	1.91353	3.44354	2.07437	-36.8067	-106.346	-151.998
57.3	-1.71558	3.4023	-0.833047	-1.74445	3.90543	-35.586	-105.735	-150.777
57.35	0.420648	0.655716	5.27047	0.086605	0.548492	-30.7032	-102.989	-149.557
57.4	-0.189704	3.09712	-0.222696	4.35907	2.37955	-34.9756	-100.547	-146.505
57.45	-2.63111	1.87642	3.13424	-0.523746	2.07437	-34.3653	-103.599	-147.421
57.5	-1.10523	1.87642	2.82906	1.30731	-0.06186	-31.6187	-105.735	-149.557
57.55	0.725823	4.623	1.91353	4.05389	3.90543	-32.229	-104.514	-148.641
57.6	1.64135	0.045364	5.57564	-0.218571	2.9899	-34.9756	-102.073	-147.726
57.65	-2.93629	4.31783	0.998007	2.22284	0.548492	-34.0601	-99.9368	-144.369
57.7	-1.41041	0.655716	4.35494	3.74871	2.07437	-31.9239	-102.683	-148.641
57.75	1.64135	2.48677	0.998007	-0.218571	2.37955	-35.2808	-103.599	-148.336
57.8	1.64135	2.1816	0.387656	0.391781	-0.367036	-35.2808	-102.683	-144.979
57.85	-2.93629	0.655716	4.66012	2.83319	1.46402	-31.3135	-99.9368	-143.148
57.9	-2.93629	4.623	-1.13822	-2.96515	2.37955	-34.3653	-98.1058	-147.115
57.95	-0.49488	0.35054	2.21871	0.086605	-0.367036	-33.7549	-99.3265	-145.589
58	1.031	5.53853	0.08248	2.52801	1.15884	-32.5342	-102.073	-141.622
58.05	-3.54664	0.045364	0.387656	-0.828922	2.68472	-31.0083	-101.463	-145.589
58.1	-4.15699	3.4023	2.21871	1.00213	-1.58774	-34.9756	-99.6316	-142.233
58.15	-2.02076	1.87642	-1.4434	2.83319	0.548492	-33.7549	-98.7161	-140.707
58.2	1.031	1.57124	2.82906	1.00213	2.9899	-30.7032	-98.4109	-142.233
58.25	-1.71558	3.70747	2.21871	2.83319	-2.19809	-33.7549	-102.378	-136.739
58.3	-3.54664	1.26607	0.692832	3.13836	-1.58774	-36.8067	-103.294	-139.181
58.35	-2.93629	6.45406	4.96529	-1.43927	0.853667	-35.2808	-103.904	-138.57
58.4	-0.800055	1.26607	0.692832	-0.828922	-2.50327	-33.1446	-102.073	-137.35
58.45	-0.49488	5.23335	2.52389	2.52801	-3.11362	-38.0274	-100.852	-138.265
58.5	-4.15699	2.79195	3.43941	-2.96515	-0.367036	-37.417	-102.073	-134.908
58.55	-3.85181	3.4023	0.08248	-2.3548	-0.367036	-34.3653	-106.346	-141.012
58.6	-2.02076	4.92818	4.35494	1.61248	-2.19809	-32.229	-106.956	-137.045
58.65	1.031	0.045364	0.998007	-2.04962	-0.06186	-35.586	-104.82	-141.012
58.7	-2.93629	4.623	0.08248	-2.04962	1.15884	-34.3653	-105.43	-138.57
58.75	-4.46216	1.87642	3.74459	2.22284	-3.41879	-32.229	-102.378	-141.622
58.8	-3.24146	2.79195	-0.222696	-0.523746	-1.28256	-31.3135	-103.294	-140.096
58.85	-0.800055	6.75923	0.692832	-0.828922	1.15884	-34.6704	-107.261	-140.401
58.9	0.725823	2.48677	2.82906	2.83319	-2.50327	-34.6704	-107.566	-140.401
58.95	-1.71558	5.53853	-0.833047	1.30731	-4.33432	-32.8394	-105.43	-139.181
59	-2.93629	7.06441	1.60836	-0.828922	-0.06186	-33.4497	-105.43	-141.317
59.05	-1.71558	4.31783	1.30318	1.30731	0.548492	-36.8067	-103.294	-137.35
59.1	1.031	7.36958	-0.527872	3.74871	-2.19809	-37.1119	-102.989	-140.707
59.15	2.86205	4.31783	4.66012	-0.828922	-0.977387	-34.6704	-105.43	-135.824
59.2	1.031	3.09712	0.387656	0.391781	3.29507	-34.0601	-108.177	-141.622
59.25	-0.49488	7.06441	0.998007	4.66424	-0.06186	-36.5015	-107.261	-138.57
59.3	1.33617	0.960892	5.27047	0.696957	0.548492	-37.1119	-104.82	-140.707
59.35	1.64135	3.09712	0.387656	-0.218571	2.37955	-34.6704	-102.378	-141.622
59.4	2.86205	5.53853	1.60836	1.30731	3.29507	-31.9239	-106.04	-138.876
59.45	-1.71558	1.26607	4.35494	1.30731	-0.367036	-35.2808	-106.956	-142.843
59.5	-1.71558	2.79195	-0.833047	-1.74445	0.853667	-35.8911	-104.82	-137.045
59.55	-0.189704	5.23335	3.13424	-0.523746	2.68472	-33.4497	-100.547	-142.233
59.6	1.031	1.26607	3.43941	2.52801	-0.06186	-31.9239	-104.82	-140.401
59.65	-1.71558	3.4023	1.60836	-0.523746	-0.06186	-34.6704	-104.514	-139.791
59.7	-0.189704	4.623	3.74459	0.391781	-0.06186	-35.8911	-102.989	-140.707
59.75	3.16723	0.35054	4.35494	2.83319	2.9899	-34.0601	-103.599	-137.35
59.8	-1.71558	3.09712	1.91353	2.83319	-1.89291	-31.0083	-104.514	-141.012
59.85	-0.800055	3.09712	4.04976	-0.828922	-1.58774	-32.5342	-102.073	-140.707
59.9	1.64135	-0.564987	4.35494	-0.218571	-0.367036	-33.7549	-104.82	-137.045
59.95	-1.41041	2.48677	1.60836	3.44354	2.37955	-32.8394	-105.43	-141.012
60	0.420648	4.31783	4.35494	0.086605	-2.19809	-30.398	-99.3265	-137.96
60.05	0.115472	0.960892	3.43941	-0.828922	-2.50327	-28.2618	-104.82	-139.791
60.1	-0.49488	3.4023	2.21871	-0.523746	-0.06186	-32.229	-100.852	-140.707
60.15	3.47241	4.31783	4.04976	2.52801	2.07437	-32.229	-99.9368	-135.824
60.2	-1.10523	1.57124	3.13424	-1.43927	-2.50327	-31.6187	-102.378	-140.707
60.25	2.86205	4.01265	0.998007	-3.27033	-2.19809	-28.2618	-97.1902	-140.096
60.3	-1.71558	3.4023	1.91353	-1.43927	-0.977387	-29.1773	-102.683	-135.824
60.35	0.420648	0.655716	1.91353	-0.218571	-0.06186	-33.7549	-99.0213	-138.57
60.4	-2.63111	2.1816	-0.527872	-3.5755	-3.41879	-32.5342	-99.9368	-137.35
60.45	-1.71558	4.92818	0.692832	-5.40656	-3.11362	-33.1446	-101.158	-135.824
60.5	-0.800055	0.960892	1.91353	-1.74445	-0.367036	-29.4825	-96.5799	-138.876
60.55	-3.24146	2.48677	-1.4434	-1.1341	2.37955	-31.0083	-101.158	-135.824
60.6	0.420648	5.53853	0.692832	-5.10138	-0.977387	-33.7549	-95.9695	-136.434
60.65	-2.93629	1.26607	2.52389	-6.01691	-0.977387	-32.5342	-99.9368	-138.265
60.7	1.94653	1.87642	-1.74857	-2.96515	0.548492	-31.6187	-99.3265	-134.603
60.75	-2.02076	5.53853	0.387656	-2.96515	2.9899	-28.5669	-97.8006	-137.96
60.8	3.47241	1.87642	2.82906	-6.62726	0.853667	-31.6187	-100.852	-137.35
60.85	-1.41041	1.26607	-1.74857	-6.01691	-0.672212	-33.7549	-95.3592	-133.382
60.9	2.2517	5.23335	-1.13822	-3.5755	-0.367036	-33.1446	-102.073	-139.181
60.95	0.420648	1.57124	3.43941	-1.74445	3.29507	-31.9239	-100.242	-137.96
61	0.420648	-0.870163	1.91353	-4.79621	3.90543	-30.398	-96.8851	-133.382
61.05	1.94653	2.79195	1.91353	-2.96515	0.548492	-32.8394	-101.768	-137.96
61.1	-0.49488	4.01265	5.57564	-1.43927	1.46402	-33.7549	-98.7161	-137.35
61.15	4.69311	0.045364	5.88082	1.00213	2.37955	-31.9239	-100.242	-133.077
61.2	-0.189704	1.87642	2.82906	-1.74445	4.82095	-29.7876	-100.852	-136.739
61.25	1.33617	4.31783	4.35494	-1.43927	0.548492	-33.1446	-96.2747	-135.519
61.3	1.031	0.655716	6.186	-0.828922	-0.977387	-33.7549	-101.158	-132.467
61.35	-0.49488	0.655716	3.43941	1.91766	0.548492	-30.0928	-101.463	-137.045
61.4	4.08276	2.79195	3.43941	0.086605	2.37955	-31.0083	-97.8006	-135.824
61.45	-0.800055	2.79195	5.88082	-3.88068	2.37955	-31.9239	-103.904	-131.857
61.5	2.2517	0.35054	3.74459	-2.96515	-1.58774	-28.2618	-102.989	-136.129
61.55	1.031	1.87642	0.08248	-1.43927	-0.672212	-31.6187	-100.242	-134.908
61.6	-0.49488	4.623	2.82906	0.391781	0.548492	-31.0083	-104.514	-130.941
61.65	4.08276	0.960892	3.43941	-2.04962	3.60025	-27.9566	-103.599	-135.213
61.7	-1.41041	1.26607	-1.13822	-2.3548	3.29507	-32.229	-99.3265	-133.993
61.75	-0.49488	3.09712	-1.4434	-1.74445	0.243316	-28.2618	-105.43	-130.025
61.8	2.55688	1.57124	2.21871	1.00213	2.37955	-31.3135	-104.514	-134.908
61.85	-0.189704	-1.48052	0.387656	-1.43927	2.9899	-31.3135	-99.6316	-133.993
61.9	1.94653	0.655716	-1.74857	-4.49103	5.4313	-29.1773	-105.43	-130.636
61.95	2.2517	4.623	0.08248	-4.49103	4.51578	-31.0083	-105.735	-133.993
62	1.94653	-0.870163	2.82906	-2.96515	1.46402	-25.5152	-101.768	-134.603
62.05	4.69311	-1.78569	-0.833047	-1.1341	1.7692	-31.3135	-105.43	-131.551
62.1	0.115472	0.35054	0.387656	-4.49103	2.68472	-26.7359	-105.735	-132.772
62.15	0.115472	4.01265	0.08248	-6.62726	5.4313	-32.229	-102.378	-133.993
62.2	5.30346	0.35054	3.13424	-5.10138	1.15884	-28.2618	-104.209	-132.162
62.25	-0.189704	1.87642	-0.527872	-2.04962	-0.06186	-30.7032	-105.43	-130.941
62.3	1.33617	4.31783	0.692832	-0.523746	0.853667	-30.0928	-102.073	-133.077
62.35	4.69311	4.623	2.52389	-3.5755	2.07437	-30.0928	-100.547	-131.246
62.4	0.420648	1.87642	3.13424	-4.79621	-0.977387	-31.6187	-102.989	-127.279
62.45	2.86205	1.87642	1.91353	-2.65998	-0.367036	-28.5669	-100.242	-132.162
62.5	3.77758	5.8437	1.91353	-0.523746	4.2106	-31.9239	-97.4954	-131.246
62.55	1.031	4.01265	4.96529	1.30731	-0.977387	-27.6514	-101.158	-128.194
62.6	3.77758	0.960892	3.74459	-0.828922	0.853667	-32.8394	-100.852	-131.857
62.65	2.86205	3.09712	0.998007	-2.65998	4.82095	-28.8721	-96.5799	-133.993
62.7	1.64135	6.14888	2.52389	-1.43927	1.46402	-33.1446	-99.6316	-132.772
62.75	3.77758	6.14888	5.57564	0.391781	3.60025	-31.9239	-100.547	-130.941
62.8	1.94653	4.31783	4.66012	3.13836	1.46402	-29.7876	-98.1058	-136.739
62.85	1.33617	5.23335	1.91353	0.696957	0.548492	-31.0083	-98.4109	-135.519
62.9	4.08276	7.67476	2.52389	-1.43927	2.68472	-25.5152	-100.242	-131.551
62.95	2.2517	5.8437	5.27047	0.391781	-1.89291	-29.4825	-99.0213	-133.993
63	1.64135	2.48677	3.74459	1.61248	3.29507	-27.3462	-95.3592	-134.908
63.05	6.52416	3.09712	0.998007	1.30731	-1.28256	-26.7359	-99.9368	-133.382
63.1	3.77758	4.92818	1.60836	-0.523746	3.29507	-28.2618	-100.242	-131.551
63.15	1.33617	4.623	3.13424	0.391781	-1.28256	-24.5996	-96.8851	-134.908
63.2	4.69311	1.87642	3.43941	2.52801	1.15884	-28.8721	-97.8006	-133.993
63.25	2.2517	2.48677	-0.527872	-1.43927	1.7692	-26.1255	-100.547	-130.025
63.3	2.2517	4.01265	0.998007	1.61248	1.7692	-24.2945	-98.7161	-131.857
63.35	4.69311	7.06441	2.52389	4.66424	2.9899	-27.9566	-94.7488	-133.688
63.4	4.08276	4.01265	3.74459	1.00213	1.7692	-23.3789	-99.0213	-133.077
63.45	1.94653	2.79195	0.387656	4.05389	3.90543	-26.1255	-98.4109	-130.025
63.5	4.69311	3.70747	0.08248	1.61248	0.548492	-26.1255	-96.2747	-133.688
63.55	4.99828	6.45406	3.43941	1.91766	6.65201	-23.6841	-94.7488	-134.908
63.6	1.64135	4.01265	3.43941	6.80047	1.15884	-28.8721	-99.0213	-132.772
63.65	4.69311	1.57124	-0.222696	0.696957	5.73648	-26.7359	-97.8006	-132.162
63.7	4.99828	2.48677	0.387656	4.05389	1.15884	-25.5152	-94.1385	-136.739
63.75	1.031	4.623	3.43941	0.391781	2.9899	-29.4825	-93.8333	-135.824
63.8	1.94653	6.14888	-0.527872	2.52801	1.15884	-26.4307	-95.3592	-134.603
63.85	5.60864	3.4023	0.998007	1.61248	0.548492	-28.8721	-92.6126	-133.688
63.9	1.031	2.79195	2.82906	1.00213	4.2106	-29.4825	-88.6453	-138.265
63.95	1.031	3.09712	0.08248	4.35907	-0.06186	-25.5152	-92.0023	-138.265
64	5.91381	5.23335	3.74459	1.30731	2.9899	-29.4825	-91.3919	-135.213
64.05	1.94653	4.31783	-1.13822	5.57977	-2.50327	-29.7876	-88.9505	-135.519
64.1	1.031	0.35054	0.998007	-0.523746	0.243316	-25.5152	-85.8987	-139.486
64.15	3.77758	-0.564987	1.91353	4.35907	1.46402	-30.7032	-88.035	-139.181
64.2	3.16723	0.045364	-0.222696	-0.218571	-0.367036	-31.0083	-88.6453	-137.35
64.25	0.420648	1.57124	3.13424	1.91766	3.90543	-26.7359	-87.1194	-135.213
64.3	1.031	0.960892	-0.222696	0.391781	-0.367036	-31.0083	-85.2884	-139.791
64.35	3.47241	-2.39604	5.27047	-0.218571	1.7692	-29.4825	-89.2557	-139.181
64.4	-1.10523	-2.70122	1.60836	1.91766	4.51578	-27.041	-88.9505	-137.655
64.45	-2.02076	-0.870163	6.79635	-0.523746	-0.367036	-31.0083	-87.7298	-136.129
64.5	2.86205	3.09712	0.998007	3.44354	2.9899	-29.1773	-85.2884	-141.012
64.55	0.420648	1.26607	6.186	-1.43927	-0.06186	-26.7359	-88.6453	-140.707
64.6	-1.41041	-0.870163	0.387656	1.91766	-1.58774	-30.7032	-89.2557	-138.265
64.65	0.115472	-1.17534	4.96529	-0.218571	1.7692	-28.8721	-87.4246	-134.908
64.7	1.031	0.655716	-2.35893	-1.1341	-3.11362	-26.7359	-84.3729	-136.739
64.75	-2.63111	2.79195	2.52389	2.22284	-1.28256	-30.0928	-86.8143	-136.739
64.8	-2.32593	4.31783	-1.74857	-1.43927	0.243316	-27.6514	-89.866	-135.213
64.85	1.64135	0.655716	3.13424	2.22284	-4.02914	-26.4307	-89.5608	-130.025
64.9	-0.800055	-0.870163	-3.27445	-1.1341	-1.89291	-30.7032	-87.1194	-129.415
64.95	-3.54664	0.655716	1.60836	-1.43927	-1.89291	-29.1773	-87.7298	-132.467
65	-1.10523	1.57124	-2.05375	3.13836	-3.41879	-25.8203	-91.0867	-131.857
65.05	1.94653	3.70747	2.52389	-1.74445	0.548492	-31.0083	-90.7815	-131.246
65.1	-3.24146	0.655716	-1.74857	1.00213	-2.19809	-28.5669	-88.9505	-128.5
65.15	-1.71558	-1.17534	0.08248	0.391781	-2.80844	-24.5996	-87.7298	-133.688
65.2	0.115472	-1.17534	-1.13822	-2.96515	2.9899	-28.8721	-91.0867	-135.519
65.25	1.33617	1.26607	0.08248	1.30731	-1.28256	-28.2618	-90.4764	-133.688
65.3	-2.63111	2.48677	0.692832	-2.3548	-1.28256	-23.9893	-89.866	-132.162
65.35	-1.71558	-0.870163	0.08248	-3.27033	2.9899	-27.6514	-87.1194	-132.162
65.4	2.86205	0.045364	2.21871	1.61248	-2.50327	-27.041	-88.3401	-135.213
65.45	1.94653	3.09712	0.387656	-4.49103	-0.367036	-24.2945	-90.1712	-135.824
65.5	-0.49488	0.655716	7.10152	-1.74445	0.853667	-27.6514	-89.5608	-134.298
65.55	0.420648	0.960892	1.30318	0.696957	-3.11362	-28.2618	-88.035	-132.162
65.6	4.38793	4.92818	5.27047	-2.65998	-0.672212	-24.9048	-84.678	-131.551
65.65	2.86205	0.35054	3.74459	1.00213	0.243316	-25.8203	-87.4246	-134.908
65.7	0.420648	-0.259811	3.43941	1.00213	-4.02914	-29.1773	-89.2557	-133.688
65.75	1.031	3.09712	5.27047	-1.43927	-2.19809	-27.6514	-86.8143	-132.467
65.8	2.86205	-0.870163	0.387656	1.91766	-0.672212	-25.8203	-85.5936	-130.025
65.85	2.55688	1.57124	4.96529	1.61248	-3.41879	-29.7876	-82.2366	-129.72
65.9	-0.189704	-0.564987	0.692832	0.696957	-1.89291	-31.3135	-84.678	-132.467
65.95	1.64135	-0.564987	0.998007	2.83319	-1.58774	-27.041	-87.7298	-132.162
66	5.30346	2.48677	1.60836	0.391781	-4.6395	-29.7876	-87.1194	-132.467
66.05	3.16723	-1.48052	-0.527872	-2.3548	-1.89291	-30.7032	-85.5936	-129.72
66.1	1.031	2.79195	4.04976	1.91766	-1.28256	-27.6514	-82.847	-133.077
66.15	0.420648	-0.870163	-1.13822	-2.3548	-4.6395	-27.041	-84.9832	-133.077
66.2	4.08276	2.79195	0.692832	-2.96515	-3.11362	-28.8721	-87.7298	-131.857
66.25	4.99828	0.35054	0.387656	0.086605	-2.19809	-27.3462	-87.4246	-132.467
66.3	0.725823	0.960892	-1.13822	-3.27033	-5.55502	-23.3789	-85.8987	-134.298
66.35	1.33617	2.48677	3.13424	-3.5755	-4.6395	-26.4307	-83.1522	-131.551
66.4	2.55688	1.26607	-1.4434	-0.523746	-1.89291	-27.6514	-83.1522	-133.382
66.45	4.69311	5.8437	1.60836	-4.49103	-5.55502	-24.5996	-85.8987	-133.993
66.5	1.64135	1.26607	2.82906	-3.5755	-4.6395	-23.9893	-85.8987	-130.331
66.55	0.725823	6.14888	0.692832	0.391781	-0.672212	-27.3462	-83.1522	-133.382
66.6	1.64135	1.87642	3.43941	-3.27033	-4.6395	-26.1255	-81.3211	-131.551
66.65	4.38793	3.70747	-0.833047	-3.27033	-4.02914	-23.0738	-79.7952	-130.025
66.7	3.47241	2.48677	-0.222696	1.61248	0.548492	-24.9048	-81.6263	-132.772
66.75	1.031	2.1816	2.52389	-1.1341	-1.89291	-27.041	-83.7625	-128.194
66.8	1.031	5.53853	-1.74857	-2.96515	-2.19809	-24.9048	-82.847	-132.772
66.85	2.55688	0.045364	1.30318	-0.828922	-0.06186	-21.8531	-82.2366	-130.331
66.9	4.08276	4.01265	0.692832	-2.65998	-0.06186	-26.1255	-79.7952	-133.077
66.95	1.031	-1.17534	-0.527872	-5.40656	-1.58774	-27.041	-77.9642	-130.941
67	-0.189704	-1.17534	5.27047	-2.96515	-0.06186	-24.9048	-79.7952	-131.857
67.05	-0.49488	1.26607	-0.222696	-2.96515	2.9899	-23.9893	-82.5418	-131.246
67.1	2.2517	-3.31157	-0.222696	-6.32209	-0.367036	-27.6514	-82.2366	-127.889
67.15	3.47241	-0.870163	3.13424	-4.18586	1.46402	-27.3462	-80.7107	-129.11
67.2	-0.189704	-2.09087	-0.222696	-1.1341	4.82095	-24.9048	-79.7952	-123.922
67.25	-0.189704	-3.31157	1.30318	-6.32209	1.46402	-24.5996	-77.0486	-127.584
67.3	0.725823	1.87642	0.998007	-4.49103	1.15884	-27.041	-78.8797	-122.091
67.35	4.38793	-3.00639	-1.13822	-0.828922	2.9899	-26.4307	-82.2366	-127.584
67.4	4.38793	-0.870163	1.60836	-5.10138	4.2106	-23.6841	-82.5418	-122.396
67.45	2.2517	1.57124	-2.35893	-4.49103	1.15884	-23.9893	-81.0159	-126.058
67.5	0.725823	-2.09087	-4.18998	-2.04962	2.9899	-27.3462	-81.0159	-124.532
67.55	1.94653	-0.259811	0.998007	-1.74445	6.65201	-25.8203	-77.9642	-125.143
67.6	3.77758	1.26607	-3.88481	-3.27033	3.29507	-25.5152	-81.0159	-124.838
67.65	4.08276	-0.564987	-3.27445	-2.3548	3.60025	-24.9048	-82.847	-120.565
67.7	1.031	2.48677	-0.222696	0.696957	5.12613	-27.9566	-83.4573	-125.448
67.75	2.2517	-0.259811	-2.6641	-3.27033	6.34683	-27.6514	-80.7107	-122.091
67.8	2.55688	-1.78569	-0.222696	-2.04962	2.9899	-25.5152	-78.2693	-123.617
67.85	4.08276	3.4023	1.30318	1.61248	2.68472	-25.21	-81.3211	-123.617
67.9	1.031	-0.259811	-2.05375	-0.828922	5.12613	-27.3462	-81.0159	-121.481
67.95	1.64135	-1.17534	0.08248	-2.65998	2.9899	-27.9566	-77.659	-125.753
68	3.16723	3.09712	0.387656	-0.218571	1.46402	-26.4307	-78.2693	-119.955
68.05	2.2517	-1.78569	-0.833047	1.91766	1.15884	-24.5996	-80.1004	-123.922
68.1	0.725823	-0.564987	0.998007	-2.3548	4.2106	-27.3462	-77.3538	-123.617
68.15	3.16723	3.70747	0.387656	-1.43927	0.243316	-26.4307	-77.659	-120.87
68.2	2.55688	-0.564987	-0.222696	2.83319	0.243316	-25.8203	-79.1849	-125.143
68.25	0.420648	0.045364	3.13424	1.61248	2.9899	-21.5479	-75.8279	-121.175
68.3	4.38793	4.92818	-0.222696	-1.74445	4.2106	-23.0738	-79.49	-122.701
68.35	-0.189704	0.655716	-0.833047	0.086605	2.07437	-24.9048	-79.49	-123.922
68.4	1.64135	0.655716	2.52389	4.05389	2.68472	-24.9048	-76.7435	-119.955
68.45	3.16723	4.92818	-0.527872	0.391781	4.82095	-22.7686	-81.9314	-125.143
68.5	-0.49488	0.35054	-1.13822	0.391781	6.34683	-22.1582	-78.2693	-124.227
68.55	5.60864	0.655716	1.60836	1.91766	2.07437	-26.1255	-81.6263	-122.091
68.6	0.420648	3.70747	-1.4434	2.22284	3.29507	-27.3462	-81.3211	-126.058
68.65	5.91381	-1.17534	-1.74857	-1.1341	5.4313	-28.2618	-76.7435	-123.006
68.7	0.725823	-0.259811	0.998007	-1.43927	5.73648	-25.8203	-80.7107	-123.617
68.75	3.47241	4.31783	0.08248	0.086605	1.15884	-24.9048	-77.3538	-126.058
68.8	2.86205	-0.564987	-1.13822	1.00213	0.853667	-28.2618	-81.6263	-123.006
68.85	3.16723	0.35054	0.692832	-3.27033	2.07437	-28.8721	-78.5745	-124.227
68.9	4.08276	3.4023	2.21871	-2.65998	2.68472	-27.3462	-76.4383	-125.143
68.95	2.55688	1.57124	-2.35893	1.00213	-0.367036	-24.2945	-79.1849	-120.565
69	5.91381	0.655716	0.692832	-0.828922	0.243316	-23.6841	-75.2176	-123.617
69.05	2.86205	2.79195	1.91353	-1.74445	1.7692	-27.3462	-80.1004	-122.701
69.1	6.82934	2.1816	-2.96928	-0.828922	4.2106	-25.8203	-76.4383	-116.903
69.15	1.031	-0.870163	-2.96928	2.83319	0.853667	-25.5152	-76.7435	-120.26
69.2	4.99828	0.655716	-0.527872	-0.523746	1.7692	-21.5479	-78.8797	-120.26
69.25	1.031	2.1816	-4.49516	-0.523746	3.29507	-21.8531	-73.6917	-116.293
69.3	3.47241	-1.78569	-4.18998	0.696957	5.73648	-25.21	-79.49	-120.87
69.35	0.725823	0.655716	-0.527872	4.05389	3.90543	-24.5996	-77.659	-118.124
69.4	0.725823	4.623	-4.49516	-0.218571	0.548492	-23.6841	-76.1331	-115.377
69.45	3.47241	0.35054	-4.18998	-0.828922	1.46402	-21.8531	-79.49	-119.344
69.5	0.420648	0.655716	-1.13822	1.00213	4.51578	-25.5152	-75.5228	-116.598
69.55	4.99828	4.92818	-2.05375	4.35907	4.2106	-25.5152	-74.9124	-114.462
69.6	0.115472	3.4023	-4.18998	-0.218571	1.46402	-23.3789	-77.659	-118.429
69.65	2.86205	2.1816	-2.35893	-0.523746	0.548492	-22.7686	-74.6072	-116.598
69.7	4.38793	4.31783	0.387656	1.30731	1.7692	-26.4307	-76.1331	-113.851
69.75	1.94653	5.8437	-4.18998	4.35907	3.60025	-24.9048	-76.1331	-117.208
69.8	5.60864	2.1816	-4.18998	0.696957	2.9899	-22.1582	-73.0814	-116.293
69.85	0.420648	2.79195	-0.222696	-0.523746	1.15884	-25.21	-75.8279	-112.936
69.9	2.86205	5.8437	-2.6641	1.61248	0.853667	-21.8531	-77.0486	-116.903
69.95	4.38793	3.4023	-3.88481	4.96942	2.07437	-23.6841	-71.8606	-114.462
70	0.420648	1.26607	-1.74857	2.22284	3.90543	-24.2945	-74.6072	-111.105
70.05	4.08276	2.79195	-1.13822	0.696957	1.46402	-20.022	-77.0486	-115.682
70.1	0.725823	3.09712	-3.88481	1.30731	-0.672212	-23.6841	-73.0814	-115.682
70.15	1.64135	-0.870163	-2.96928	4.05389	-0.367036	-21.5479	-74.6072	-112.325
70.2	4.99828	-0.259811	-0.222696	4.66424	1.7692	-24.9048	-75.5228	-116.293
70.25	0.420648	3.4023	-2.05375	0.696957	3.29507	-23.0738	-71.8606	-116.903
70.3	2.55688	1.57124	-3.57963	0.391781	0.243316	-23.6841	-73.0814	-113.241
70.35	4.08276	-0.259811	-1.74857	2.22284	0.243316	-25.21	-73.6917	-116.598
70.4	0.115472	1.57124	1.30318	4.35907	1.15884	-21.8531	-71.8606	-118.124
70.45	2.55688	5.23335	-2.35893	0.391781	3.60025	-24.9048	-71.8606	-116.293
70.5	2.2517	1.26607	-2.35893	-0.523746	4.82095	-20.9375	-74.9124	-117.208
70.55	0.115472	2.1816	-0.527872	0.696957	1.15884	-26.4307	-72.1658	-117.208
70.6	3.77758	3.4023	-0.527872	2.83319	2.07437	-22.4634	-69.7244	-116.293
70.65	0.420648	5.53853	-4.80033	3.44354	5.73648	-27.3462	-73.3865	-114.462
70.7	0.420648	3.09712	-4.18998	0.086605	3.60025	-23.0738	-71.8606	-118.124
70.75	6.21899	1.87642	-1.13822	0.696957	1.7692	-26.7359	-69.1141	-116.903
70.8	1.64135	5.23335	-2.6641	1.61248	3.29507	-25.5152	-71.5555	-112.02
70.85	2.86205	6.14888	-5.10551	3.74871	2.68472	-26.1255	-71.5555	-115.377
70.9	6.21899	2.1816	-3.57963	2.52801	0.853667	-27.6514	-68.5037	-115.682
70.95	0.725823	1.87642	0.692832	-0.523746	4.2106	-23.6841	-71.2503	-112.02
71	2.2517	4.92818	-1.13822	-0.523746	2.37955	-28.2618	-73.3865	-112.02
71.05	3.47241	5.53853	-3.27445	0.391781	2.68472	-23.3789	-71.5555	-114.462
71.1	-0.49488	2.1816	-2.05375	3.13836	5.73648	-28.2618	-72.471	-113.851
71.15	2.55688	2.48677	1.30318	1.91766	1.15884	-26.4307	-77.659	-110.494
71.2	2.86205	4.92818	-0.833047	-0.218571	4.51578	-27.041	-75.8279	-114.462
71.25	-1.10523	5.53853	-2.96928	0.696957	0.853667	-28.8721	-73.0814	-114.462
71.3	-0.189704	2.1816	-3.57963	2.22284	2.37955	-24.2945	-77.0486	-111.715
71.35	1.64135	2.1816	0.08248	3.44354	3.29507	-28.2618	-77.9642	-112.63
71.4	-0.800055	3.4023	-2.05375	1.00213	1.15884	-25.21	-74.3021	-113.546
71.45	1.031	3.70747	-4.18998	1.91766	4.2106	-26.4307	-72.7762	-111.715
71.5	2.86205	0.35054	-3.57963	5.27459	0.548492	-27.041	-75.5228	-109.884
71.55	-0.189704	0.655716	0.08248	0.696957	5.73648	-21.8531	-73.9969	-112.936
71.6	3.77758	2.48677	0.387656	1.00213	0.243316	-25.21	-68.8089	-115.377
71.65	4.99828	5.23335	-2.6641	4.05389	4.2106	-23.6841	-71.8606	-112.02
71.7	1.64135	1.87642	-2.35893	-0.523746	0.548492	-21.5479	-71.5555	-111.105
71.75	3.16723	0.655716	0.692832	0.696957	3.29507	-24.9048	-69.7244	-114.767
71.8	4.99828	0.35054	3.43941	1.00213	2.07437	-21.8531	-67.283	-113.851
71.85	1.64135	3.70747	-1.74857	-0.828922	2.37955	-24.2945	-70.9451	-111.41
71.9	2.55688	3.09712	-1.4434	2.22284	3.90543	-26.1255	-70.9451	-112.63
71.95	4.99828	0.045364	2.21871	-2.3548	1.46402	-21.8531	-67.8934	-115.987
72	0.725823	0.960892	-1.13822	0.696957	5.12613	-26.1255	-67.8934	-114.462
72.05	1.64135	3.4023	-1.13822	0.086605	1.7692	-25.8203	-70.3348	-110.189
72.1	2.86205	5.53853	0.998007	1.30731	4.2106	-23.0738	-70.0296	-113.851
72.15	-2.02076	1.87642	-1.74857	1.91766	-0.672212	-27.6514	-67.8934	-115.682
72.2	-1.10523	1.87642	-3.27445	0.391781	2.07437	-25.21	-70.3348	-114.462
72.25	2.2517	1.87642	1.30318	4.66424	0.853667	-23.6841	-72.7762	-111.41
72.3	-1.41041	4.01265	-3.27445	1.00213	-0.06186	-27.3462	-71.8606	-114.767
72.35	-1.71558	3.09712	-1.74857	4.66424	3.90543	-25.21	-69.4192	-116.293
72.4	-0.189704	0.35054	-1.74857	-0.523746	0.853667	-24.9048	-73.6917	-115.682
72.45	1.031	-1.48052	-3.88481	4.35907	4.51578	-27.3462	-74.3021	-112.936
72.5	-1.71558	0.35054	0.08248	-0.523746	0.853667	-24.5996	-73.9969	-115.682
72.55	-0.189704	2.79195	-4.80033	1.61248	1.15884	-28.2618	-71.5555	-116.293
72.6	2.2517	1.87642	0.387656	-1.74445	4.51578	-29.4825	-74.9124	-115.682
72.65	-1.10523	-1.17534	-3.88481	0.086605	1.15884	-26.1255	-75.2176	-112.325
72.7	-0.49488	0.045364	0.387656	-1.1341	4.51578	-29.7876	-74.6072	-115.377
72.75	2.2517	2.79195	-3.27445	-2.65998	3.60025	-30.7032	-70.3348	-116.903
72.8	-0.189704	5.8437	0.692832	0.696957	1.46402	-25.8203	-73.0814	-117.513
72.85	-0.49488	4.623	-2.96928	-3.27033	6.95718	-30.0928	-74.3021	-114.462
72.9	1.94653	2.1816	0.998007	1.91766	2.37955	-30.398	-73.0814	-113.851
72.95	3.16723	2.48677	-1.13822	-2.04962	2.37955	-24.9048	-69.4192	-116.903
73	0.115472	3.4023	1.60836	-0.828922	5.12613	-28.2618	-71.5555	-116.903
73.05	1.94653	5.8437	-0.833047	-0.218571	0.853667	-28.2618	-73.0814	-115.072
73.1	6.52416	4.623	1.60836	-1.74445	2.37955	-23.6841	-72.7762	-111.41
73.15	2.86205	1.26607	-0.833047	1.61248	1.15884	-27.3462	-69.4192	-114.462
73.2	2.2517	0.35054	0.387656	-3.5755	-1.28256	-27.6514	-67.8934	-115.987
73.25	4.38793	1.26607	-2.05375	-0.218571	3.29507	-22.7686	-72.1658	-114.767
73.3	6.52416	2.79195	0.387656	-1.1341	-0.367036	-26.4307	-71.2503	-111.41
73.35	2.86205	4.31783	-1.74857	-3.27033	-0.367036	-27.3462	-70.0296	-112.02
73.4	3.16723	2.1816	-1.4434	0.086605	4.82095	-23.6841	-67.5882	-113.546
73.45	5.91381	0.045364	-0.833047	-4.79621	0.853667	-26.7359	-70.9451	-114.462
73.5	4.99828	0.35054	-0.527872	-2.3548	2.37955	-27.041	-72.471	-112.02
73.55	2.2517	2.48677	1.60836	-1.43927	5.73648	-24.9048	-71.5555	-110.189
73.6	1.94653	3.09712	-0.222696	-3.27033	0.853667	-25.21	-70.3348	-113.241
73.65	5.30346	0.655716	3.74459	0.086605	2.07437	-27.041	-69.7244	-115.377
73.7	1.94653	0.045364	-2.6641	-2.65998	3.60025	-24.5996	-73.3865	-114.767
73.75	-0.49488	4.92818	2.82906	-2.3548	0.853667	-24.2945	-73.0814	-111.41
73.8	0.420648	1.87642	-2.35893	3.44354	1.46402	-27.9566	-71.8606	-109.884
73.85	3.47241	0.655716	-0.527872	-1.74445	1.7692	-25.5152	-69.7244	-114.156
73.9	-0.49488	4.01265	-1.74857	0.696957	-1.28256	-21.8531	-71.2503	-115.377
73.95	-0.49488	1.26607	-2.6641	2.22284	2.37955	-24.9048	-72.7762	-114.462
74	1.33617	0.655716	2.21871	-1.1341	0.548492	-25.5152	-71.8606	-111.105
74.05	4.08276	5.23335	-2.6641	0.696957	-1.28256	-21.5479	-70.9451	-108.968
74.1	1.031	1.26607	1.60836	0.086605	3.29507	-23.9893	-66.9778	-111.105
74.15	1.33617	2.1816	-1.4434	-0.828922	1.7692	-23.3789	-69.4192	-112.02
74.2	3.16723	3.4023	-0.833047	2.52801	0.243316	-21.2427	-71.2503	-110.189
74.25	5.30346	2.48677	0.998007	-0.218571	3.29507	-20.9375	-69.4192	-106.527
74.3	0.725823	7.06441	-2.6641	-0.828922	1.7692	-24.2945	-69.7244	-107.137
74.35	0.725823	1.26607	2.52389	3.74871	0.853667	-23.0738	-67.283	-110.494
74.4	1.94653	4.01265	-2.35893	-0.218571	3.60025	-21.2427	-68.1985	-109.884
74.45	4.38793	2.79195	-1.4434	0.696957	2.37955	-25.8203	-71.2503	-105.917
74.5	1.031	3.09712	-0.833047	5.27459	0.853667	-25.21	-70.9451	-107.442
74.55	0.725823	5.23335	-3.57963	0.696957	3.60025	-23.3789	-70.9451	-108.053
74.6	1.64135	0.655716	0.998007	1.30731	3.90543	-23.6841	-67.8934	-105.611
74.65	4.08276	6.14888	-3.27445	4.66424	1.15884	-26.4307	-67.8934	-105.306
74.7	1.031	1.26607	-2.35893	-1.74445	3.29507	-23.6841	-71.8606	-108.968
74.75	-0.49488	5.8437	-1.4434	0.086605	4.2106	-19.4117	-72.471	-106.527
74.8	1.031	0.960892	-4.18998	2.22284	0.243316	-24.5996	-71.2503	-107.137
74.85	3.16723	3.09712	-0.527872	-1.74445	1.15884	-23.9893	-68.5037	-108.358
74.9	1.94653	1.57124	-4.18998	-1.74445	2.9899	-22.1582	-66.3675	-105.611
74.95	-0.189704	2.1816	-4.18998	1.00213	0.243316	-20.3272	-67.8934	-109.274
75	0.725823	3.70747	-0.527872	-2.3548	1.15884	-22.7686	-70.0296	-107.442
75.05	3.16723	1.57124	-5.10551	-1.74445	4.82095	-21.5479	-70.0296	-108.053
75.1	5.60864	5.8437	-2.35893	1.00213	-0.672212	-18.191	-68.5037	-108.968
75.15	1.33617	0.35054	-4.18998	-2.96515	-0.06186	-20.9375	-68.1985	-105.917
75.2	1.031	1.57124	-4.18998	-1.1341	2.68472	-22.1582	-65.7571	-110.494
75.25	1.64135	1.26607	1.30318	3.44354	0.853667	-21.8531	-67.8934	-106.527
75.3	2.2517	0.35054	-4.18998	-0.218571	-1.28256	-19.1065	-70.3348	-111.105
75.35	2.86205	4.623	-1.74857	1.30731	0.853667	-22.1582	-69.7244	-109.274
75.4	-0.49488	-0.259811	0.387656	6.19012	2.07437	-22.7686	-68.8089	-111.715
75.45	-0.49488	1.26607	-3.27445	1.91766	-0.672212	-22.4634	-65.452	-107.748
75.5	0.115472	3.70747	0.08248	2.52801	-0.672212	-19.7168	-63.6209	-108.968
75.55	2.86205	0.960892	-2.05375	6.4953	3.90543	-22.7686	-64.2313	-107.442
75.6	2.2517	4.01265	-3.27445	2.22284	1.46402	-22.1582	-67.283	-106.527
75.65	-1.10523	1.87642	0.998007	1.91766	0.853667	-19.7168	-67.5882	-107.137
75.7	-0.189704	1.26607	-3.88481	5.57977	2.68472	-17.8858	-67.5882	-103.78
75.75	1.031	6.45406	-5.41068	2.22284	1.46402	-21.2427	-66.3675	-107.748
75.8	3.16723	1.26607	-0.222696	0.696957	-0.06186	-20.022	-64.8416	-102.865
75.85	1.94653	2.1816	-4.80033	4.35907	0.548492	-19.1065	-66.3675	-108.663
75.9	0.725823	5.53853	-2.96928	5.27459	4.2106	-17.5806	-69.7244	-105.611
75.95	1.031	1.26607	-0.833047	0.696957	0.548492	-21.8531	-70.6399	-108.358
76	1.64135	2.79195	-3.88481	2.22284	0.548492	-23.0738	-70.0296	-108.663
76.05	4.08276	3.09712	-1.13822	4.35907	2.68472	-22.1582	-66.6727	-105.306
76.1	0.725823	-0.564987	-0.527872	0.086605	4.2106	-19.1065	-66.0623	-107.748
76.15	-1.71558	2.48677	-2.6641	1.00213	-0.06186	-23.0738	-68.5037	-103.17
76.2	-0.800055	1.87642	0.08248	4.35907	1.15884	-23.3789	-67.8934	-107.748
76.25	3.16723	-0.259811	-2.05375	1.61248	4.51578	-22.4634	-65.1468	-105.917
76.3	-1.10523	3.09712	-2.35893	1.30731	2.37955	-19.7168	-65.7571	-104.086
76.35	-2.63111	1.26607	1.30318	4.35907	0.243316	-22.4634	-66.3675	-106.832
76.4	1.33617	1.26607	-3.27445	4.96942	2.07437	-23.6841	-63.6209	-102.56
76.45	-0.49488	5.53853	-2.96928	1.30731	5.12613	-23.3789	-64.2313	-107.137
76.5	-0.49488	4.31783	-0.222696	2.83319	0.243316	-20.6324	-66.3675	-105.611
76.55	3.47241	3.4023	-3.57963	6.4953	-0.367036	-19.4117	-61.7898	-103.17
76.6	-0.800055	7.36958	-3.27445	1.91766	0.243316	-22.4634	-64.5364	-106.832
76.65	-0.189704	5.23335	1.30318	-0.218571	3.29507	-21.2427	-65.1468	-102.255
76.7	2.86205	4.92818	-0.833047	4.05389	-0.977387	-18.8013	-61.7898	-105.001
76.75	-1.71558	9.20064	-2.05375	5.27459	-2.19809	-16.6651	-66.0623	-105.306
76.8	2.86205	6.14888	2.21871	0.391781	0.243316	-18.4961	-63.3157	-100.118
76.85	-2.32593	5.23335	-2.05375	0.391781	-0.06186	-20.3272	-64.8416	-106.527
76.9	-0.189704	6.45406	-1.13822	3.44354	-4.02914	-19.7168	-66.0623	-104.391
76.95	-0.189704	6.14888	3.43941	3.13836	-4.6395	-18.4961	-60.5691	-102.865
77	-1.41041	4.92818	-0.833047	1.30731	-3.41879	-16.6651	-65.452	-106.222
77.05	1.94653	7.97994	-1.4434	1.30731	-2.50327	-19.1065	-63.9261	-103.475
77.1	-0.49488	7.06441	1.60836	4.35907	-5.55502	-20.9375	-63.9261	-103.78
77.15	4.38793	5.23335	0.08248	1.91766	-5.55502	-20.9375	-62.7054	-103.475
77.2	-0.800055	7.67476	-0.222696	0.696957	-4.02914	-19.1065	-59.6536	-99.2027
77.25	3.77758	8.89546	0.998007	1.91766	-2.19809	-16.6651	-62.095	-102.56
77.3	0.115472	4.31783	0.692832	5.57977	-5.8602	-19.1065	-57.5174	-102.865
77.35	3.77758	6.75923	-2.6641	1.30731	-5.8602	-20.3272	-63.0106	-97.3717
77.4	-0.189704	8.28511	-1.4434	1.61248	-4.6395	-18.8013	-60.264	-102.56
77.45	1.94653	4.31783	-1.4434	2.83319	-1.89291	-18.191	-59.6536	-102.255
77.5	1.33617	5.23335	-5.41068	4.66424	-3.41879	-16.3599	-63.6209	-98.5924
77.55	1.94653	8.89546	-3.57963	1.61248	-4.02914	-20.022	-59.0433	-103.17
77.6	4.99828	4.31783	-1.74857	2.52801	-2.50327	-22.1582	-63.9261	-101.644
77.65	1.64135	4.31783	-6.93656	5.27459	0.853667	-21.8531	-62.7054	-98.2872
77.7	5.91381	8.28511	-6.02104	4.96942	0.548492	-19.4117	-59.9588	-102.865
77.75	0.420648	7.06441	-2.05375	1.91766	-2.19809	-19.1065	-63.9261	-99.5079
77.8	3.77758	4.623	-6.02104	1.91766	-0.367036	-23.3789	-60.5691	-97.3717
77.85	-0.189704	7.67476	-6.02104	4.35907	1.7692	-22.1582	-59.3484	-101.339
77.9	-0.189704	10.4213	-2.6641	4.35907	3.90543	-18.4961	-62.095	-100.118
77.95	3.16723	5.53853	-1.74857	0.086605	0.853667	-20.6324	-57.5174	-98.2872
78	-1.41041	5.53853	-3.57963	-0.218571	-0.367036	-23.3789	-59.3484	-103.17
78.05	1.94653	10.7265	-1.4434	0.696957	-0.367036	-21.5479	-61.1795	-101.644
78.1	-1.71558	6.45406	2.52389	2.52801	1.7692	-20.3272	-56.2967	-100.729
78.15	-0.800055	6.45406	-1.74857	0.086605	2.68472	-22.4634	-59.6536	-105.306
78.2	3.16723	8.89546	-2.05375	0.086605	-1.58774	-19.7168	-60.5691	-102.865
78.25	-1.41041	9.20064	1.30318	1.00213	-1.28256	-22.4634	-55.3812	-98.8976
78.3	1.94653	6.75923	-0.833047	4.35907	-0.06186	-23.3789	-60.5691	-102.865
78.35	1.031	7.36958	-3.57963	2.52801	3.60025	-18.191	-61.1795	-100.423
78.4	-0.49488	10.1162	-2.05375	1.61248	1.46402	-22.1582	-57.8226	-97.3717
78.45	3.47241	7.06441	-0.527872	2.52801	-1.58774	-19.1065	-61.1795	-101.339
78.5	-0.800055	5.53853	-4.49516	4.66424	-0.672212	-21.5479	-61.1795	-99.2027
78.55	-0.189704	7.06441	-5.41068	5.27459	-0.06186	-20.6324	-58.7381	-95.8458
78.6	4.08276	8.59029	-1.4434	1.61248	2.9899	-20.022	-59.9588	-99.2027
78.65	-0.49488	3.70747	-0.527872	1.30731	1.7692	-22.4634	-59.6536	-99.8131
78.7	1.031	5.53853	-4.18998	2.22284	-0.672212	-19.1065	-56.907	-96.151
78.75	1.33617	6.45406	-3.57963	4.66424	-0.367036	-22.1582	-57.8226	-101.339
78.8	-0.800055	6.14888	0.08248	0.696957	2.07437	-16.3599	-58.7381	-102.865
78.85	2.2517	1.87642	-0.833047	-1.1341	3.90543	-23.0738	-54.7708	-100.423
78.9	-1.71558	4.01265	-2.96928	-0.218571	-1.89291	-18.8013	-53.8553	-101.949
78.95	-2.93629	8.59029	-1.13822	0.086605	-0.06186	-22.1582	-56.6019	-103.475
79	1.64135	6.14888	1.60836	2.22284	1.15884	-19.7168	-54.1605	-101.644
79.05	-2.93629	4.623	-1.4434	-1.43927	1.15884	-20.9375	-51.4139	-99.5079
79.1	-2.93629	5.23335	-1.74857	-3.5755	-1.28256	-21.2427	-55.3812	-103.78
79.15	1.33617	9.81099	-1.4434	-2.96515	1.46402	-20.3272	-55.076	-101.644
79.2	-2.93629	7.06441	1.91353	-1.43927	2.07437	-22.1582	-52.0242	-97.3717
79.25	-0.189704	5.53853	-2.35893	1.61248	-0.672212	-17.5806	-55.3812	-101.339
79.3	2.86205	7.36958	-2.96928	-2.04962	2.07437	-21.8531	-56.6019	-101.034
79.35	-2.32593	9.20064	-1.4434	-3.88068	-0.367036	-16.6651	-54.1605	-97.6769
79.4	0.420648	4.01265	0.998007	-3.5755	-1.58774	-21.5479	-56.6019	-99.5079
79.45	3.47241	3.09712	-1.4434	-2.04962	2.68472	-19.4117	-58.4329	-101.034
79.5	-0.800055	4.623	-2.05375	0.086605	-0.977387	-20.3272	-55.9915	-99.8131
79.55	0.725823	7.67476	-1.74857	-4.18586	4.2106	-21.2427	-53.8553	-95.5406
79.6	1.94653	4.623	0.387656	-3.88068	0.548492	-16.6651	-57.8226	-101.034
79.65	-1.41041	3.09712	-2.05375	-2.3548	1.15884	-20.9375	-57.5174	-100.423
79.7	-0.800055	4.31783	-2.6641	0.391781	1.7692	-17.5806	-52.0242	-96.4562
79.75	-0.189704	8.28511	-1.4434	-4.18586	-1.89291	-18.4961	-55.076	-96.4562
79.8	-4.15699	5.23335	2.82906	-3.5755	2.07437	-18.8013	-56.6019	-99.5079
79.85	-0.49488	3.09712	-0.833047	1.61248	-1.28256	-14.5288	-55.6863	-98.2872
79.9	2.2517	4.31783	-1.74857	-2.3548	2.9899	-20.3272	-53.2449	-94.0148
79.95	-1.71558	7.06441	-0.222696	-2.04962	-2.80844	-18.4961	-56.907	-96.7613
80	0.115472	5.8437	2.52389	1.00213	1.7692	-19.4117	-56.2967	-97.982
80.05	3.16723	2.1816	0.998007	-3.88068	-1.89291	-21.8531	-53.8553	-95.2355
80.1	-0.189704	2.1816	-2.35893	-0.218571	2.37955	-18.191	-55.076	-93.7096
80.15	1.64135	4.31783	-2.05375	0.086605	-1.58774	-21.2427	-57.8226	-97.982
80.2	4.69311	5.23335	-0.222696	-1.74445	0.853667	-21.5479	-55.9915	-96.4562
80.25	-0.189704	0.960892	-2.05375	3.74871	0.853667	-17.8858	-54.4656	-95.2355
80.3	0.420648	-0.259811	-3.88481	-0.828922	0.853667	-23.0738	-57.2122	-94.6251
80.35	4.99828	0.655716	-1.74857	2.83319	4.82095	-21.8531	-57.2122	-97.6769
80.4	-0.49488	4.31783	-2.05375	1.00213	1.46402	-20.3272	-55.3812	-97.982
80.45	-0.49488	2.79195	-5.41068	2.52801	6.34683	-23.6841	-53.5501	-96.4562
80.5	4.38793	0.045364	-1.13822	2.83319	0.853667	-21.5479	-57.8226	-97.982
80.55	0.420648	0.960892	-2.6641	1.61248	3.90543	-22.7686	-56.907	-100.423
80.6	0.115472	3.09712	-4.49516	5.27459	-0.367036	-25.5152	-54.1605	-99.5079
80.65	1.64135	6.45406	0.387656	0.391781	-0.06186	-20.6324	-54.1605	-97.3717
80.7	2.55688	4.01265	-4.80033	5.88495	3.29507	-23.6841	-57.5174	-100.423
80.75	-0.189704	2.1816	-0.222696	1.00213	-1.28256	-23.6841	-58.1277	-102.56
80.8	0.725823	2.79195	-2.05375	6.19012	2.68472	-18.8013	-54.4656	-101.034
80.85	4.08276	4.31783	-2.35893	1.30731	-1.89291	-23.3789	-54.7708	-96.7613
80.9	-1.71558	6.75923	0.692832	4.66424	-0.672212	-22.1582	-59.0433	-99.2027
80.95	-1.71558	2.79195	-2.05375	3.13836	0.853667	-17.8858	-58.4329	-101.034
81	1.94653	1.87642	1.30318	4.66424	-3.41879	-23.6841	-56.2967	-99.2027
81.05	-1.71558	3.09712	-4.18998	3.13836	-0.06186	-22.1582	-54.7708	-94.9303
81.1	-2.02076	4.92818	0.08248	2.22284	-2.50327	-19.1065	-59.9588	-97.6769
81.15	0.115472	6.45406	-3.57963	5.57977	-3.11362	-23.0738	-58.4329	-100.118
81.2	1.33617	4.31783	0.998007	1.91766	0.853667	-22.1582	-55.9915	-99.8131
81.25	-2.63111	5.23335	-4.49516	6.4953	-4.02914	-19.4117	-54.1605	-97.3717
81.3	-1.10523	5.53853	0.08248	1.91766	-2.19809	-22.4634	-58.7381	-97.982
81.35	2.86205	6.75923	-4.18998	4.05389	-1.58774	-20.9375	-58.1277	-101.949
81.4	-0.49488	8.28511	1.30318	4.35907	-2.19809	-18.4961	-55.6863	-100.729
81.45	-1.71558	6.45406	-3.57963	3.74871	0.548492	-21.8531	-53.2449	-100.729
81.5	0.725823	4.31783	1.60836	7.41082	-2.80844	-19.4117	-56.6019	-97.6769
81.55	3.47241	3.09712	-2.96928	2.52801	-2.80844	-16.6651	-57.8226	-101.034
81.6	0.420648	3.4023	2.82906	4.66424	0.853667	-21.2427	-57.5174	-101.644
81.65	1.33617	4.01265	-1.74857	2.83319	-4.6395	-19.1065	-53.2449	-100.118
81.7	4.69311	4.92818	2.82906	1.00213	-3.11362	-17.2754	-54.7708	-97.982
81.75	2.86205	2.79195	-2.35893	4.35907	-0.367036	-20.9375	-57.5174	-97.3717
81.8	1.33617	2.79195	1.91353	-0.218571	-4.6395	-19.7168	-56.6019	-101.034
81.85	2.55688	4.31783	-1.74857	1.30731	-2.19809	-16.0547	-56.2967	-100.423
81.9	4.69311	7.97994	-1.13822	2.83319	-0.977387	-21.2427	-53.5501	-97.982
81.95	0.725823	5.53853	-2.05375	-0.218571	-3.72397	-20.6324	-59.3484	-96.151
82	0.115472	2.79195	-1.4434	4.05389	-0.367036	-16.6651	-59.9588	-98.8976
82.05	2.2517	4.01265	-0.833047	-0.218571	-1.28256	-20.9375	-58.1277	-100.729
82.1	4.08276	7.36958	-3.57963	-0.218571	-2.19809	-20.3272	-56.6019	-99.8131
82.15	-0.189704	2.1816	0.08248	3.74871	0.548492	-16.6651	-57.2122	-98.8976
82.2	1.64135	3.09712	-4.49516	-0.828922	-1.58774	-19.4117	-60.8743	-96.7613
82.25	3.16723	6.45406	-0.222696	-0.828922	-1.89291	-19.4117	-59.3484	-98.8976
82.3	4.69311	2.1816	-4.18998	1.61248	1.46402	-17.2754	-59.0433	-101.339
82.35	0.420648	3.4023	-3.27445	-2.96515	-1.28256	-16.0547	-57.8226	-100.118
82.4	1.031	5.53853	-0.833047	-0.828922	-0.672212	-19.1065	-59.6536	-99.5079
82.45	3.77758	1.87642	-3.88481	-0.828922	2.68472	-18.191	-62.4002	-95.8458
82.5	4.38793	5.53853	1.60836	-2.96515	-0.977387	-13.9185	-61.4847	-97.6769
82.55	-1.10523	2.48677	-4.18998	-0.218571	-1.58774	-17.8858	-60.8743	-99.5079
82.6	-0.49488	3.70747	-1.13822	-1.74445	2.68472	-17.5806	-58.1277	-98.2872
82.65	1.94653	4.31783	-3.27445	-0.828922	-0.367036	-13.003	-59.6536	-94.9303
82.7	4.69311	2.79195	-4.49516	3.44354	-0.672212	-16.6651	-62.095	-92.7941
82.75	0.115472	7.36958	-0.222696	-0.523746	3.29507	-19.4117	-60.5691	-95.2355
82.8	0.725823	2.48677	-6.63139	-0.523746	1.15884	-17.2754	-59.6536	-94.3199
82.85	1.33617	6.45406	-2.96928	2.52801	0.243316	-16.9702	-56.907	-91.5733
82.9	3.77758	1.57124	-4.80033	-2.3548	4.2106	-21.5479	-56.2967	-93.4044
82.95	-0.49488	4.31783	-6.32621	-1.43927	1.15884	-20.3272	-59.0433	-94.0148
83	-1.71558	4.31783	-1.13822	1.00213	0.243316	-15.4444	-59.3484	-91.5733
83.05	-0.49488	2.1816	-6.02104	-3.5755	2.9899	-19.1065	-58.7381	-94.3199
83.1	2.55688	4.623	-2.05375	-1.74445	1.7692	-19.1065	-54.7708	-94.9303
83.15	0.420648	1.26607	-1.4434	1.00213	-1.89291	-17.8858	-52.3294	-91.5733
83.2	-2.32593	4.92818	-3.27445	-4.18586	1.15884	-14.5288	-56.2967	-97.0665
83.25	-0.189704	0.655716	1.91353	-2.3548	1.7692	-18.191	-56.907	-94.9303
83.3	1.64135	4.01265	-2.96928	2.22284	-1.28256	-17.8858	-56.2967	-94.3199
83.35	2.86205	1.57124	-0.833047	-2.04962	0.243316	-13.9185	-55.9915	-96.4562
83.4	-0.800055	3.09712	-1.13822	-1.1341	2.37955	-16.9702	-53.8553	-91.8785
83.45	-1.10523	5.23335	-3.57963	1.91766	-0.06186	-19.1065	-54.1605	-97.0665
83.5	0.725823	1.57124	-1.74857	-0.828922	0.548492	-18.191	-57.2122	-91.2682
83.55	3.77758	5.8437	-4.80033	0.696957	2.9899	-15.1392	-58.1277	-94.6251
83.6	1.94653	0.655716	-6.02104	3.44354	-1.28256	-20.022	-56.907	-92.4889
83.65	-1.10523	1.57124	-1.74857	-0.523746	-1.28256	-20.9375	-57.5174	-92.1837
83.7	-1.41041	1.87642	-5.71586	-1.43927	2.68472	-18.8013	-54.7708	-93.7096
83.75	-0.49488	-2.09087	-3.27445	3.13836	1.46402	-17.5806	-54.4656	-91.2682
83.8	1.031	1.87642	-2.6641	-0.523746	-1.28256	-21.5479	-56.907	-92.7941
83.85	-1.71558	-1.17534	-4.49516	-1.43927	1.15884	-20.022	-59.0433	-90.0475
83.9	-3.85181	-1.48052	-0.527872	3.74871	2.37955	-19.1065	-58.7381	-94.3199
83.95	-3.54664	2.48677	-2.6641	-0.218571	-1.89291	-17.2754	-56.907	-90.6578
84	-2.02076	-2.70122	-1.4434	1.00213	-0.367036	-22.4634	-55.076	-94.9303
84.05	0.420648	0.655716	2.52389	3.44354	3.60025	-21.5479	-52.6346	-90.963
84.1	-2.02076	1.87642	-1.74857	1.30731	0.243316	-18.4961	-54.4656	-95.2355
84.15	-2.63111	-0.870163	-0.222696	1.91766	-0.06186	-17.5806	-56.2967	-91.2682
84.2	-1.41041	3.09712	3.74459	3.44354	-0.367036	-20.6324	-55.3812	-92.7941
84.25	1.33617	0.960892	-1.4434	2.83319	1.46402	-20.9375	-54.4656	-93.7096
84.3	2.86205	1.57124	1.30318	-0.218571	-0.672212	-16.9702	-52.9398	-90.963
84.35	1.031	4.623	2.21871	2.22284	0.548492	-14.5288	-53.2449	-94.3199
84.4	-0.189704	0.35054	-0.527872	5.27459	3.60025	-18.8013	-56.907	-88.5216
84.45	0.420648	0.35054	0.998007	1.30731	1.46402	-18.8013	-56.6019	-93.4044
84.5	3.16723	4.92818	-1.4434	1.91766	0.853667	-17.2754	-55.9915	-92.1837
84.55	1.94653	0.045364	-2.05375	4.96942	2.37955	-16.0547	-54.4656	-90.0475
84.6	0.115472	1.26607	1.30318	2.83319	5.4313	-20.9375	-56.6019	-91.8785
84.65	1.33617	6.45406	-2.35893	1.00213	-0.06186	-22.4634	-55.6863	-86.9957
84.7	4.38793	1.57124	-2.6641	3.74871	0.243316	-18.8013	-52.3294	-91.5733
84.75	0.115472	4.31783	0.692832	4.66424	2.9899	-16.9702	-56.2967	-89.7423
84.8	1.031	5.8437	-2.05375	0.391781	2.9899	-19.4117	-55.076	-86.9957
84.85	3.47241	0.655716	-2.96928	1.30731	-1.58774	-21.8531	-50.8035	-90.6578
84.9	-0.49488	2.1816	1.30318	3.74871	-0.367036	-19.7168	-55.076	-87.3009
84.95	1.64135	6.14888	-2.6641	1.30731	3.29507	-16.9702	-52.6346	-90.963
85	1.33617	0.35054	-2.05375	1.00213	1.7692	-15.4444	-51.4139	-90.0475
85.05	-0.189704	3.4023	2.21871	2.83319	-1.58774	-19.1065	-53.5501	-85.4698
85.1	4.38793	5.53853	-2.35893	4.05389	-0.06186	-19.7168	-48.9725	-90.3526
85.15	-0.800055	0.655716	-1.74857	0.086605	3.29507	-18.191	-53.2449	-89.7423
85.2	3.47241	2.1816	2.52389	1.61248	0.243316	-14.5288	-52.9398	-87.3009
85.25	0.115472	4.31783	-1.13822	4.96942	-0.977387	-17.8858	-51.4139	-90.6578
85.3	0.115472	0.655716	-1.4434	1.91766	0.243316	-19.7168	-54.1605	-86.9957
85.35	1.33617	0.655716	2.21871	0.086605	3.90543	-18.4961	-50.8035	-89.4371
85.4	0.115472	3.4023	-0.222696	0.391781	1.46402	-17.2754	-55.3812	-90.963
85.45	2.2517	-1.48052	0.387656	5.27459	-0.367036	-16.9702	-52.6346	-87.3009
85.5	-1.41041	0.960892	3.13424	1.30731	0.243316	-20.6324	-54.1605	-90.963
85.55	2.86205	4.92818	1.91353	0.391781	2.9899	-20.3272	-55.9915	-90.963
85.6	0.115472	0.35054	1.30318	1.91766	0.548492	-20.9375	-52.0242	-86.9957
85.65	3.77758	0.35054	4.04976	5.27459	-2.19809	-18.8013	-55.076	-90.963
85.7	-1.41041	4.623	4.04976	0.696957	-1.58774	-17.2754	-52.0242	-89.7423
85.75	2.55688	1.26607	1.91353	0.696957	1.7692	-20.9375	-53.5501	-86.6905
85.8	-1.71558	0.655716	2.21871	1.91766	1.46402	-21.2427	-52.9398	-91.8785
85.85	1.031	3.70747	3.13424	4.05389	-1.58774	-20.6324	-49.888	-88.2164
85.9	-0.189704	3.09712	-1.74857	-0.523746	-0.672212	-18.4961	-52.9398	-85.775
85.95	-0.800055	0.960892	-0.833047	-1.1341	0.853667	-17.5806	-49.888	-90.3526
86	1.94653	3.4023	2.52389	0.696957	3.29507	-19.7168	-50.4983	-88.2164
86.05	-1.10523	4.31783	-1.4434	1.61248	-0.367036	-19.7168	-52.9398	-86.0802
86.1	4.08276	0.35054	-2.05375	-0.828922	-0.977387	-19.1065	-48.9725	-89.4371
86.15	-1.41041	1.87642	0.998007	-0.828922	0.548492	-14.834	-52.6346	-86.3854
86.2	1.33617	5.23335	-2.35893	1.61248	2.37955	-18.191	-52.9398	-84.5543
86.25	0.725823	0.655716	-1.4434	2.83319	-0.367036	-19.7168	-48.6673	-89.4371
86.3	-0.189704	0.655716	-0.833047	-0.828922	-1.89291	-17.2754	-52.0242	-87.3009
86.35	3.47241	4.92818	0.08248	0.086605	-1.89291	-17.2754	-50.8035	-86.0802
86.4	-2.02076	3.4023	-3.57963	0.696957	0.243316	-19.1065	-48.0569	-90.963
86.45	1.64135	0.655716	-1.74857	3.13836	1.7692	-16.0547	-52.3294	-88.2164
86.5	-0.189704	1.87642	1.60836	0.086605	-0.977387	-17.5806	-51.4139	-85.775
86.55	-1.10523	4.92818	-1.13822	-0.523746	-2.80844	-18.191	-47.7518	-91.2682
86.6	3.47241	1.26607	-0.833047	0.391781	-0.977387	-13.9185	-53.5501	-89.4371
86.65	-1.71558	1.57124	1.30318	3.44354	3.29507	-17.8858	-51.719	-86.9957
86.7	1.031	4.01265	2.21871	1.61248	2.9899	-16.3599	-50.8035	-90.6578
86.75	0.725823	3.70747	-0.833047	-0.523746	0.853667	-15.7495	-54.7708	-88.5216
86.8	-2.02076	0.655716	-1.13822	1.00213	1.46402	-18.4961	-54.1605	-84.2491
86.85	0.420648	2.1816	2.82906	3.44354	3.29507	-14.5288	-50.8035	-88.8268
86.9	-3.24146	4.92818	-0.527872	4.05389	6.04166	-18.4961	-55.076	-87.9112
86.95	-4.15699	1.87642	-1.4434	0.696957	6.34683	-14.834	-54.1605	-83.0284
87	-0.800055	1.87642	0.387656	1.30731	3.29507	-16.9702	-50.8035	-86.9957
87.05	-5.68287	3.70747	0.692832	1.61248	2.9899	-14.5288	-54.4656	-86.9957
87.1	-2.32593	4.31783	-1.74857	4.35907	5.12613	-16.3599	-55.076	-83.3336
87.15	-1.10523	0.045364	-2.35893	2.52801	8.17789	-17.8858	-49.888	-86.6905
87.2	-4.76734	0.35054	1.30318	0.391781	3.90543	-16.6651	-52.9398	-86.9957
87.25	-1.41041	2.48677	-1.13822	-0.523746	2.68472	-19.1065	-53.5501	-84.8595
87.3	-0.800055	1.26607	-3.88481	2.52801	4.2106	-16.0547	-50.8035	-82.7233
87.35	-2.32593	-2.09087	-1.74857	3.44354	6.34683	-19.7168	-51.719	-85.775
87.4	-0.189704	-2.09087	2.21871	0.696957	0.853667	-16.0547	-53.2449	-83.6388
87.45	-2.32593	2.1816	-0.527872	-1.43927	1.15884	-20.3272	-51.4139	-79.9767
87.5	-2.93629	0.045364	-1.4434	-0.828922	6.34683	-17.2754	-47.7518	-83.6388
87.55	2.86205	-0.870163	0.692832	1.91766	0.853667	-20.6324	-52.0242	-81.8077
87.6	-2.32593	0.960892	3.74459	2.83319	2.07437	-18.4961	-50.4983	-78.1456
87.65	-1.71558	4.01265	-1.13822	-0.218571	5.12613	-19.1065	-45.6155	-79.6715
87.7	2.2517	2.1816	-1.74857	-1.1341	2.37955	-20.9375	-50.1932	-81.8077
87.75	-2.32593	-0.564987	-0.833047	0.391781	5.12613	-16.3599	-49.888	-79.6715
87.8	-1.10523	1.57124	1.91353	2.83319	2.07437	-21.8531	-46.8362	-76.6197
87.85	1.031	5.23335	-2.05375	2.83319	1.7692	-17.2754	-47.4466	-80.8922
87.9	-3.54664	2.1816	-3.88481	0.391781	3.60025	-21.5479	-52.0242	-80.8922
87.95	-2.93629	0.045364	-1.4434	0.391781	0.853667	-20.9375	-49.888	-78.4508
88	0.420648	0.655716	0.692832	2.83319	6.95718	-18.191	-46.2259	-80.587
88.05	-5.68287	4.01265	-2.35893	4.05389	1.15884	-20.9375	-50.8035	-82.7233
88.1	-4.46216	2.48677	-4.18998	1.30731	5.4313	-16.0547	-52.6346	-82.7233
88.15	0.420648	-0.259811	-2.6641	2.83319	2.9899	-19.7168	-49.888	-78.756
88.2	-3.85181	-0.259811	0.998007	6.4953	5.12613	-19.1065	-49.2776	-82.1129
88.25	-2.02076	1.87642	0.08248	2.22284	2.07437	-15.4444	-52.0242	-81.5025
88.3	0.725823	2.1816	-2.35893	2.52801	1.7692	-19.7168	-49.888	-79.6715
88.35	-2.93629	-0.870163	-1.74857	6.80047	2.68472	-16.3599	-46.2259	-79.6715
88.4	-1.71558	-1.48052	1.30318	2.83319	0.548492	-16.6651	-51.1087	-83.0284
88.45	1.94653	0.655716	1.60836	5.27459	3.29507	-18.8013	-50.8035	-82.1129
88.5	-3.54664	3.09712	-3.57963	3.74871	-0.977387	-15.1392	-48.3621	-79.0611
88.55	-2.93629	-0.870163	-2.05375	1.91766	5.73648	-19.7168	-47.1414	-80.587
88.6	0.115472	-1.48052	1.91353	5.88495	1.46402	-19.1065	-51.4139	-83.0284
88.65	-3.24146	0.045364	-2.05375	1.91766	5.4313	-15.7495	-50.4983	-82.1129
88.7	-2.63111	4.31783	-3.57963	5.57977	0.853667	-19.7168	-48.6673	-78.1456
88.75	1.33617	3.4023	0.387656	0.696957	2.9899	-16.6651	-49.5828	-81.5025
88.8	-1.41041	0.045364	-2.35893	2.22284	2.07437	-15.4444	-51.719	-82.4181
88.85	-0.800055	0.960892	-2.6641	0.391781	0.853667	-18.191	-50.4983	-81.5025
88.9	1.33617	4.01265	1.91353	0.086605	3.60025	-15.4444	-46.5311	-78.756
88.95	1.64135	7.06441	-3.27445	1.00213	-0.06186	-14.834	-48.9725	-82.4181
89	1.031	5.23335	-1.74857	-0.523746	4.2106	-16.6651	-50.4983	-83.0284
89.05	1.64135	3.70747	-0.527872	3.44354	0.243316	-13.6133	-48.3621	-81.5025
89.1	4.08276	3.70747	-2.6641	-0.523746	1.15884	-15.7495	-44.3948	-79.3663
89.15	-0.189704	7.06441	0.08248	3.44354	2.9899	-16.0547	-48.0569	-83.3336
89.2	0.725823	8.59029	-3.57963	-1.43927	0.243316	-12.3926	-48.6673	-84.5543
89.25	4.69311	4.31783	0.998007	3.74871	3.90543	-16.9702	-48.9725	-82.4181
89.3	0.420648	4.623	-2.96928	-1.1341	-0.367036	-17.5806	-45.6155	-79.6715
89.35	0.420648	4.623	0.08248	1.61248	-0.367036	-12.3926	-48.0569	-80.8922
89.4	1.64135	6.14888	-2.96928	-0.218571	3.29507	-17.2754	-51.4139	-83.0284
89.45	0.725823	6.14888	0.387656	2.22284	-0.367036	-16.6651	-50.1932	-82.7233
89.5	-1.41041	3.09712	-2.05375	3.74871	2.37955	-12.6978	-47.7518	-79.3663
89.55	0.115472	2.1816	-0.833047	1.91766	2.68472	-17.5806	-48.3621	-78.4508
89.6	2.55688	3.09712	-4.18998	6.4953	1.46402	-17.5806	-52.3294	-82.4181
89.65	-0.800055	4.623	-0.833047	1.91766	5.73648	-14.2237	-51.1087	-81.8077
89.7	-0.49488	7.06441	-3.88481	4.66424	2.07437	-19.4117	-47.4466	-80.8922
89.75	2.2517	4.92818	-1.4434	3.74871	2.37955	-19.1065	-47.7518	-78.1456
89.8	1.031	3.09712	-3.27445	2.22284	5.73648	-14.2237	-52.0242	-83.944
89.85	-0.189704	4.31783	-1.13822	6.19012	0.548492	-18.191	-51.1087	-84.2491
89.9	0.115472	4.92818	-1.4434	1.00213	2.9899	-17.8858	-48.0569	-82.7233
89.95	4.38793	6.45406	0.692832	4.05389	2.37955	-12.3926	-46.5311	-79.9767
90	-0.49488	5.8437	-0.833047	0.696957	-0.06186	-16.6651	-48.9725	-81.8077
90.05	1.33617	3.4023	-0.527872	-0.218571	3.60025	-15.7495	-49.888	-83.6388
90.1	4.08276	3.09712	0.387656	4.96942	0.853667	-11.7823	-48.6673	-82.7233
90.15	4.99828	5.23335	-0.527872	-0.218571	-0.977387	-16.0547	-45.0052	-81.8077
90.2	0.725823	8.28511	1.60836	1.61248	3.29507	-17.2754	-45.3104	-79.0611
90.25	1.031	4.623	-1.13822	1.91766	-0.06186	-15.1392	-48.3621	-82.7233
90.3	4.69311	5.23335	2.52389	0.696957	-0.06186	-16.9702	-47.1414	-84.5543
90.35	3.77758	6.45406	-1.74857	4.05389	4.82095	-20.6324	-45.3104	-83.3336
90.4	0.725823	8.59029	0.998007	0.391781	-1.28256	-16.9702	-43.7845	-82.4181
90.45	2.86205	4.01265	-2.6641	0.086605	-0.367036	-17.8858	-47.1414	-79.3663
90.5	6.52416	4.01265	0.08248	3.74871	2.9899	-20.6324	-48.3621	-83.3336
90.55	3.47241	7.36958	-0.222696	-0.828922	-0.977387	-19.4117	-46.8362	-85.775
90.6	0.420648	4.01265	-1.13822	1.00213	1.46402	-18.8013	-46.2259	-84.8595
90.65	1.64135	5.8437	2.82906	2.22284	4.2106	-20.9375	-45.9207	-83.0284
90.7	4.99828	7.36958	-2.35893	-0.523746	-0.367036	-20.3272	-49.888	-80.587
90.75	1.33617	3.70747	3.13424	1.91766	0.853667	-15.4444	-50.1932	-83.3336
90.8	-0.189704	7.67476	-1.4434	1.30731	2.9899	-19.4117	-48.6673	-84.5543
90.85	0.725823	4.623	-1.13822	-0.218571	-0.672212	-19.7168	-46.2259	-85.1647
90.9	4.08276	4.623	0.998007	2.22284	2.37955	-16.3599	-44.7	-82.1129
90.95	1.031	8.59029	-1.74857	1.61248	4.51578	-17.2754	-47.7518	-80.587
91	0.115472	4.623	1.91353	0.391781	-0.977387	-20.022	-48.9725	-83.0284
91.05	1.031	9.81099	-2.96928	4.35907	0.853667	-17.8858	-47.7518	-82.7233
91.1	4.08276	5.53853	-1.74857	-0.523746	3.60025	-15.7495	-46.5311	-81.1974
91.15	1.64135	7.97994	-0.222696	0.391781	-1.28256	-19.1065	-44.3948	-80.8922
91.2	0.420648	7.97994	-3.27445	4.35907	-0.977387	-19.1065	-47.1414	-83.6388
91.25	0.115472	7.36958	0.387656	0.086605	2.37955	-15.1392	-48.9725	-81.5025
91.3	3.77758	10.1162	-3.57963	0.391781	-3.72397	-16.9702	-47.7518	-79.6715
91.35	2.2517	6.45406	-2.05375	3.74871	-2.50327	-19.1065	-46.2259	-83.6388
91.4	-0.49488	11.3369	-0.527872	-0.828922	1.15884	-17.5806	-43.4793	-82.7233
91.45	0.420648	6.75923	-4.49516	1.00213	-3.41879	-16.6651	-43.4793	-79.6715
91.5	2.55688	10.7265	-1.74857	3.74871	-2.80844	-19.7168	-45.6155	-84.8595
91.55	4.38793	5.23335	-5.10551	-1.43927	0.548492	-19.7168	-45.6155	-81.8077
91.6	-0.49488	6.14888	-4.80033	-0.218571	-2.80844	-17.5806	-45.3104	-83.944
91.65	0.115472	6.14888	-0.833047	3.13836	-4.02914	-17.8858	-42.2586	-83.0284
91.7	-0.189704	4.31783	-5.41068	-2.3548	-0.977387	-21.2427	-40.1224	-80.8922
91.75	3.47241	8.28511	-2.6641	-0.828922	-0.977387	-19.1065	-41.6482	-83.944
91.8	0.725823	3.4023	-3.27445	1.91766	-4.33432	-16.6651	-44.0897	-77.8404
91.85	-0.49488	7.67476	-5.71586	-2.3548	-2.19809	-20.022	-44.0897	-83.0284
91.9	0.420648	4.623	-2.05375	-1.43927	-1.58774	-20.9375	-42.2586	-79.9767
91.95	3.16723	5.23335	-6.32621	2.22284	-4.6395	-19.1065	-41.0379	-81.8077
92	3.47241	8.89546	-5.71586	-2.04962	-4.02914	-15.7495	-38.5965	-80.587
92.05	1.031	4.31783	-2.6641	-0.828922	0.548492	-20.3272	-39.8172	-81.1974
92.1	0.115472	7.36958	-7.85209	3.13836	-3.72397	-19.1065	-42.2586	-81.1974
92.15	1.94653	5.23335	-6.32621	-1.1341	-4.02914	-15.4444	-43.7845	-79.0611
92.2	3.16723	3.70747	-5.10551	-1.74445	0.548492	-14.5288	-42.2586	-80.8922
92.25	2.86205	7.06441	-7.54692	1.30731	-0.367036	-17.8858	-40.7327	-77.2301
92.3	-0.800055	3.70747	-3.57963	-0.218571	-2.50327	-17.8858	-38.9017	-81.1974
92.35	-0.800055	4.623	-7.24174	-2.65998	-0.367036	-14.5288	-39.512	-77.5353
92.4	0.725823	6.14888	-7.24174	0.086605	1.7692	-13.9185	-41.9534	-83.3336
92.45	4.08276	2.48677	-1.74857	-0.218571	-2.80844	-18.8013	-42.8689	-78.4508
92.5	2.55688	6.45406	-5.41068	-2.96515	-4.02914	-19.1065	-41.3431	-82.7233
92.55	-0.49488	6.45406	-3.57963	-0.828922	0.853667	-16.9702	-40.1224	-81.5025
92.6	-0.189704	3.70747	-0.833047	1.91766	-1.58774	-16.6651	-36.4603	-81.5025
92.65	1.94653	6.75923	-4.49516	-1.43927	-3.11362	-19.4117	-37.3758	-82.4181
92.7	4.69311	3.09712	-2.35893	-0.218571	-1.89291	-20.3272	-40.4275	-77.5353
92.75	1.64135	3.09712	-1.74857	2.83319	2.07437	-18.191	-39.512	-82.4181
92.8	-0.800055	7.36958	-5.10551	-0.828922	-0.977387	-14.834	-38.2913	-78.756
92.85	0.420648	2.1816	-1.74857	-1.1341	-1.58774	-17.8858	-37.681	-80.587
92.9	4.08276	2.1816	-2.6641	1.91766	0.548492	-18.4961	-42.2586	-79.6715
92.95	1.031	5.53853	-5.41068	1.30731	1.7692	-16.6651	-42.8689	-75.7042
93	1.33617	1.57124	-3.27445	-0.828922	-2.19809	-13.9185	-38.9017	-79.9767
93.05	4.08276	0.655716	-3.88481	-0.828922	-1.58774	-16.0547	-42.8689	-76.0094
93.1	4.38793	4.31783	-5.71586	4.05389	1.7692	-18.191	-43.1741	-78.1456
93.15	1.33617	0.655716	-2.35893	0.391781	-0.977387	-17.8858	-38.9017	-78.756
93.2	5.30346	0.35054	-4.80033	0.391781	-4.02914	-14.2237	-44.3948	-73.568
93.25	3.77758	2.1816	-6.63139	3.74871	-2.80844	-14.5288	-44.3948	-78.1456
93.3	3.47241	-1.78569	-2.35893	1.91766	2.68472	-18.4961	-40.4275	-75.399
93.35	6.82934	-0.870163	-5.41068	0.391781	-1.89291	-18.8013	-44.7	-73.568
93.4	1.64135	2.79195	-6.63139	0.086605	-2.19809	-16.6651	-41.0379	-76.0094
93.45	4.69311	-1.48052	-3.27445	2.52801	-0.367036	-13.003	-41.9534	-73.2628
93.5	2.55688	-0.564987	-5.71586	-0.218571	2.37955	-15.7495	-43.1741	-75.7042
93.55	3.16723	3.70747	-6.32621	-1.43927	-1.28256	-17.5806	-38.5965	-76.0094
93.6	3.77758	-0.564987	-4.49516	0.696957	-3.11362	-16.0547	-42.5638	-72.3473
93.65	-0.189704	0.960892	-5.41068	1.00213	0.548492	-14.834	-40.1224	-78.1456
93.7	5.60864	4.623	-6.02104	-2.65998	2.9899	-13.003	-41.9534	-77.5353
93.75	1.031	1.87642	-3.88481	-1.1341	-0.06186	-17.8858	-42.2586	-75.0939
93.8	5.30346	0.960892	-4.49516	2.52801	-1.28256	-18.4961	-39.8172	-79.6715
93.85	1.33617	5.23335	-6.32621	1.00213	0.548492	-18.4961	-44.0897	-78.756
93.9	4.08276	0.655716	-2.05375	-1.43927	4.2106	-16.9702	-40.7327	-77.5353
93.95	0.725823	0.35054	-2.05375	0.391781	1.46402	-16.9702	-45.6155	-79.6715
94	1.94653	3.09712	-4.80033	3.44354	-0.672212	-19.1065	-44.0897	-77.8404
94.05	0.420648	1.87642	-3.27445	-0.218571	-0.367036	-19.7168	-43.7845	-79.0611
94.1	0.115472	0.35054	-0.527872	-2.04962	3.90543	-19.4117	-47.4466	-79.9767
94.15	1.94653	2.48677	-3.27445	-0.828922	2.68472	-17.5806	-41.6482	-75.399
94.2	-0.800055	3.09712	-2.35893	1.61248	-0.977387	-17.2754	-45.9207	-77.5353
94.25	3.16723	0.655716	2.21871	-1.74445	-0.06186	-20.3272	-44.7	-77.5353
94.3	-1.41041	2.79195	-2.6641	-2.96515	1.7692	-20.9375	-41.6482	-73.568
94.35	2.86205	5.53853	-2.6641	-1.1341	3.29507	-19.7168	-45.3104	-75.399
94.4	-0.49488	0.960892	0.387656	1.30731	-0.977387	-16.9702	-41.0379	-75.399
94.45	1.64135	0.045364	-1.13822	-1.1341	-0.977387	-18.4961	-42.2586	-71.1266
94.5	2.2517	3.70747	-3.27445	-2.96515	0.548492	-20.3272	-42.2586	-75.0939
94.55	0.420648	0.35054	-0.527872	-2.04962	3.60025	-18.4961	-36.4603	-75.7042
94.6	5.60864	-1.78569	0.692832	1.61248	2.07437	-15.7495	-40.4275	-72.0421
94.65	-0.49488	1.26607	-4.18998	-1.43927	-1.28256	-19.1065	-41.3431	-76.6197
94.7	2.2517	0.960892	-3.27445	-3.88068	0.243316	-18.4961	-36.7654	-77.5353
94.75	1.94653	-2.70122	1.60836	-3.27033	2.68472	-14.834	-41.6482	-73.8732
94.8	-0.189704	-2.09087	-3.57963	-0.218571	5.4313	-19.1065	-40.4275	-78.1456
94.85	3.16723	2.79195	-4.80033	-0.523746	2.68472	-19.7168	-37.0706	-79.0611
94.9	-1.41041	0.35054	-2.6641	-3.88068	0.853667	-14.5288	-41.6482	-76.6197
94.95	1.33617	-0.564987	-2.35893	-2.65998	1.15884	-19.1065	-40.7327	-80.2818
95	3.77758	2.48677	-5.10551	-0.218571	2.9899	-17.2754	-35.2396	-80.587
95.05	0.725823	3.4023	-3.88481	1.30731	1.7692	-16.9702	-38.5965	-76.9249
95.1	4.69311	0.35054	-0.527872	-2.3548	-1.89291	-17.5806	-38.2913	-80.587
95.15	1.94653	2.48677	-2.35893	-2.3548	-3.72397	-13.3081	-33.4085	-80.587
95.2	1.64135	5.53853	-4.18998	-0.523746	-2.80844	-18.4961	-39.512	-77.2301
95.25	5.91381	3.09712	-1.74857	2.52801	-1.58774	-13.9185	-39.2068	-78.4508
95.3	0.420648	2.1816	-0.527872	1.00213	-1.89291	-18.4961	-35.5447	-81.8077
95.35	1.031	4.01265	-3.57963	-1.74445	-4.33432	-16.0547	-41.0379	-79.6715
95.4	4.08276	4.92818	-3.27445	-0.523746	-4.6395	-17.2754	-40.7327	-78.4508
95.45	-0.189704	0.960892	-1.13822	1.61248	-3.11362	-16.6651	-36.7654	-82.1129
95.5	1.94653	0.655716	-0.527872	3.74871	-0.06186	-16.3599	-39.8172	-80.2818
95.55	2.86205	2.79195	-3.88481	0.696957	-2.50327	-17.2754	-41.3431	-77.8404
95.6	2.2517	3.09712	-2.35893	-0.828922	-3.11362	-14.2237	-39.2068	-81.5025
95.65	4.69311	-1.17534	2.21871	-0.218571	-1.28256	-18.8013	-38.5965	-82.1129
95.7	2.86205	-0.259811	-0.222696	2.52801	1.46402	-13.6133	-41.3431	-77.2301
95.75	1.64135	2.48677	-0.222696	2.22284	-2.80844	-17.2754	-38.9017	-80.8922
95.8	6.82934	3.4023	0.998007	-0.523746	-2.50327	-11.7823	-36.4603	-80.8922
95.85	2.86205	0.960892	4.35494	-2.04962	2.68472	-16.9702	-40.1224	-77.5353
95.9	2.2517	1.26607	2.82906	-1.1341	-2.80844	-13.6133	-37.9861	-78.1456
95.95	6.52416	5.53853	0.08248	0.696957	-0.672212	-14.5288	-33.1033	-81.5025
96	1.031	4.31783	0.08248	1.61248	1.15884	-13.6133	-38.2913	-79.9767
96.05	2.2517	1.57124	2.82906	-0.828922	-3.41879	-11.1719	-39.512	-74.1783
96.1	6.52416	1.57124	-0.222696	-2.3548	0.548492	-14.5288	-36.1551	-79.6715
96.15	1.33617	4.92818	-4.18998	-2.04962	-2.50327	-9.95121	-35.8499	-79.0611
96.2	1.031	2.79195	-1.4434	-0.828922	-0.672212	-15.7495	-38.5965	-76.6197
96.25	4.69311	-0.259811	2.52389	-2.04962	0.853667	-13.9185	-36.7654	-76.9249
96.3	0.420648	0.35054	0.998007	-4.49103	-1.58774	-14.834	-34.0189	-79.3663
96.35	0.420648	3.4023	-2.05375	-3.27033	2.68472	-16.6651	-37.9861	-76.3146
96.4	4.69311	2.79195	-1.13822	-0.523746	-0.977387	-12.0874	-39.2068	-74.1783
96.45	1.031	0.045364	2.21871	-3.27033	3.29507	-17.8858	-35.8499	-77.5353
96.5	1.64135	0.35054	1.30318	-4.49103	-1.58774	-15.4444	-36.7654	-76.0094
96.55	4.38793	2.1816	-1.74857	-0.218571	1.15884	-14.5288	-39.8172	-74.7887
96.6	0.115472	4.623	-1.74857	-3.27033	-1.89291	-16.0547	-39.2068	-74.1783
96.65	1.33617	1.87642	0.998007	-3.88068	-0.367036	-11.1719	-35.2396	-78.1456
96.7	6.21899	0.960892	2.82906	0.696957	-1.89291	-15.7495	-38.9017	-76.3146
96.75	1.33617	2.48677	-0.527872	-3.5755	-1.58774	-14.5288	-37.3758	-74.7887
96.8	2.2517	4.92818	-1.74857	-2.96515	0.243316	-11.4771	-34.9344	-76.6197
96.85	6.82934	2.79195	1.60836	-0.828922	-0.367036	-15.7495	-34.6292	-78.4508
96.9	2.86205	0.045364	2.21871	-2.96515	3.29507	-13.003	-37.9861	-75.7042
96.95	2.2517	0.655716	-0.527872	1.91766	-0.06186	-12.6978	-37.0706	-72.0421
97	4.99828	2.48677	-0.833047	-3.88068	4.82095	-15.7495	-33.4085	-74.7887
97.05	1.64135	3.70747	3.13424	-0.828922	1.46402	-11.7823	-36.4603	-74.4835
97.1	-0.49488	-0.564987	-1.74857	-2.04962	4.2106	-15.1392	-37.9861	-73.2628
97.15	2.55688	-0.564987	-0.527872	-1.43927	0.548492	-16.9702	-36.4603	-70.8214
97.2	1.031	2.1816	1.91353	0.696957	1.46402	-12.0874	-33.4085	-75.399
97.25	-0.49488	4.31783	-2.6641	-2.3548	2.68472	-16.3599	-36.7654	-77.8404
97.3	1.031	2.48677	1.30318	0.696957	0.548492	-14.834	-38.2913	-76.9249
97.35	3.77758	-0.870163	-0.222696	-3.5755	5.12613	-11.7823	-36.4603	-76.6197
97.4	-0.800055	1.26607	-0.527872	1.00213	-0.977387	-16.6651	-34.6292	-80.2818
97.45	-0.189704	2.79195	2.21871	-4.79621	1.46402	-13.9185	-38.2913	-81.1974
97.5	4.08276	5.53853	-0.833047	0.391781	0.548492	-11.4771	-38.5965	-78.4508
97.55	0.420648	4.01265	3.43941	-2.3548	-1.58774	-16.0547	-36.4603	-74.1783
97.6	0.725823	1.87642	-0.833047	0.086605	1.7692	-13.003	-33.7137	-78.1456
97.65	3.47241	2.48677	2.21871	-2.04962	-2.80844	-12.6978	-37.681	-77.2301
97.7	3.16723	4.31783	-2.35893	-1.1341	0.243316	-16.0547	-38.9017	-75.0939
97.75	1.64135	6.14888	1.30318	0.086605	0.853667	-13.6133	-37.681	-71.7369
97.8	3.16723	4.31783	-1.74857	-1.74445	-3.11362	-13.9185	-35.2396	-75.7042
97.85	5.91381	1.26607	0.998007	1.91766	0.853667	-18.191	-38.5965	-76.9249
97.9	2.2517	2.1816	-1.13822	-2.96515	-1.89291	-15.7495	-40.4275	-75.7042
97.95	0.725823	1.57124	3.43941	0.696957	-1.28256	-15.7495	-40.1224	-73.8732
98	4.38793	4.31783	0.692832	-2.96515	2.9899	-18.8013	-36.4603	-73.8732
98.05	2.2517	3.70747	2.21871	-2.65998	-1.58774	-15.1392	-38.2913	-75.399
98.1	0.115472	0.045364	0.387656	-0.523746	0.548492	-15.7495	-41.9534	-75.399
98.15	2.2517	-1.17534	2.82906	-3.27033	3.29507	-17.5806	-41.6482	-72.0421
98.2	4.99828	0.35054	0.08248	1.61248	0.243316	-16.3599	-38.5965	-70.8214
98.25	0.420648	2.48677	1.91353	-2.96515	2.68472	-17.2754	-39.512	-74.7887
98.3	1.031	4.31783	0.08248	-2.04962	1.7692	-19.7168	-43.7845	-76.9249
98.35	4.38793	3.09712	0.692832	-0.523746	0.243316	-16.6651	-43.7845	-76.9249
98.4	5.60864	1.57124	0.387656	-2.65998	5.12613	-16.3599	-41.9534	-73.2628
98.45	1.64135	1.87642	0.08248	-0.218571	-0.367036	-18.191	-40.1224	-75.7042
98.5	2.55688	4.31783	0.08248	-4.49103	0.243316	-15.4444	-43.4793	-78.4508
98.55	5.30346	5.53853	-2.35893	-5.10138	3.90543	-12.0874	-45.6155	-78.1456
98.6	4.38793	-0.259811	1.60836	-1.1341	-1.89291	-14.5288	-45.3104	-76.0094
98.65	1.64135	1.26607	-3.57963	-5.71174	-1.58774	-13.3081	-43.1741	-74.4835
98.7	2.55688	2.1816	0.998007	-3.27033	1.15884	-9.64603	-42.5638	-76.6197
98.75	5.30346	1.57124	-3.27445	-4.18586	-2.50327	-13.3081	-46.8362	-78.1456
98.8	2.86205	-2.09087	0.998007	-6.01691	-0.367036	-12.0874	-45.0052	-76.9249
98.85	1.94653	-0.564987	-2.6641	-1.43927	1.46402	-9.34085	-43.7845	-74.7887
98.9	2.55688	1.87642	-2.35893	-6.01691	-2.50327	-13.9185	-40.4275	-70.8214
98.95	4.69311	-1.48052	-0.833047	-6.01691	-0.06186	-13.9185	-42.5638	-74.1783
99	2.86205	1.87642	-2.05375	-2.96515	0.853667	-9.95121	-44.7	-74.7887
99.05	1.64135	0.35054	3.13424	-6.93244	-1.58774	-13.6133	-41.9534	-74.1783
99.1	2.86205	0.045364	-1.74857	-5.40656	0.853667	-15.4444	-40.4275	-72.6525
99.15	4.99828	4.92818	1.60836	-4.49103	1.15884	-12.6978	-38.5965	-70.8214
99.2	2.86205	1.26607	0.692832	-7.54279	-1.89291	-11.4771	-41.3431	-75.0939
99.25	1.94653	4.31783	0.998007	-4.18586	0.853667	-14.834	-41.9534	-75.0939
99.3	3.16723	3.09712	5.27047	-3.88068	0.243316	-12.6978	-41.3431	-74.1783
99.35	5.91381	3.09712	0.08248	-5.71174	-3.11362	-8.7305	-40.4275	-71.1266
99.4	1.94653	6.75923	2.82906	-2.65998	0.548492	-11.7823	-37.9861	-72.9576
99.45	0.725823	1.57124	-0.527872	-2.96515	0.548492	-11.1719	-39.512	-74.1783
99.5	1.64135	5.23335	-1.74857	-2.65998	-2.80844	-9.64603	-41.9534	-71.1266
99.55	4.08276	0.045364	0.998007	0.086605	-0.672212	-9.03568	-41.6482	-68.38
99.6	2.55688	2.1816	-3.57963	-2.3548	1.46402	-11.1719	-41.0379	-72.0421
99.65	-0.800055	-1.48052	-0.833047	-3.27033	-2.19809	-8.7305	-40.1224	-72.0421
99.7	0.420648	-0.870163	-4.18998	1.30731	-0.06186	-6.2891	-38.9017	-67.4645
99.75	2.2517	0.655716	-3.88481	-3.27033	2.37955	-9.64603	-42.8689	-72.0421
99.8	3.16723	-0.259811	-0.833047	-3.5755	-3.11362	-8.7305	-43.7845	-70.5162
99.85	-0.189704	3.4023	-3.88481	0.391781	-1.28256	-7.20462	-43.7845	-68.9903
99.9	0.420648	-0.870163	-0.527872	-3.88068	1.46402	-5.98392	-41.0379	-71.4317
[truncated: 3,161 more rows]

## Sheet: Fig 1 S3b
dis	tau fast	n = 15	tau slow	n = 15	base	tau fast		tau slow		apex
0
0.14			67	23		-
0.28	15	8.7	48	6.8		19.1	6.8	46.8	8.8
0.42	13	6.2	42	14.3		11.5	6.2	36.8	3.9
0.56	7	4.9	37	11.5		8.3	3.1	42.1	5.2
0.7	6	3.1	27	8.1		7.4	5.3	36.4	10.6
0.84	4	4.6	23	10.2		7.1	6.2	32.9	7.1
0.98	3.7	3.8	19	8.5		6.3	3.8	31.1	6.2
1.12	2.1	1.1	17	4.8		3.6	2.6	24	5.7
1.36	2	1.4	18	6.3		1.8	0.8	21.7	7.3

## Sheet: Fig 1 S3c
Time	Current (pA)															Figure 1- figure supplement 3
7099.35	3.02509	-3.14953	3.19398	3.14114	0.30814	1.26216	-2.7377				Current traces as shown in inset.					Displacement-clamp current recordings from eight-week-old adult SGNs.
7099.4	3.94062	-4.37024	-0.162958	4.05667	-0.607388	4.92427	-6.39981
7099.45	0.27851	-1.31848	1.36292	2.22561	-0.302212	0.346634	-4.26358
7099.5	1.49921	-3.14953	5.02503	4.66702	0.613316	0.956985	0.314056
7099.55	3.94062	-4.37024	3.49915	5.88772	-1.21774	3.39839	-3.9584
7099.6	4.55097	-0.097775	1.05774	2.83597	2.74955	0.956985	-3.04288
7099.65	1.80439	-4.67541	1.6681	5.58255	-0.912563	4.61909	-2.12735
7099.7	2.10956	-3.75988	3.80433	6.80325	3.05472	1.26216	-0.296295
7099.75	3.94062	0.512577	0.752569	4.05667	-1.21774	1.26216	-4.87393
7099.8	3.63544	-3.75988	-1.38366	5.27737	3.05472	4.61909	-3.65323
7099.85	0.27851	-4.37024	-1.68884	8.32913	0.002964	0.346634	0.924408
7099.9	-0.637017	0.207401	0.142218	2.22561	1.83402	4.92427	-1.517
7099.95	2.41474	-2.84436	0.752569	3.44632	1.52884	1.26216	-3.9584
7100	3.63544	-4.06506	-1.07848	7.10843	-0.302212	3.09322	-2.43253
7100.05	-0.026666	0.512577	-1.38366	2.83597	3.66507	3.39839	0.619232
7100.1	-0.331842	-3.45471	1.05774	1.00491	-0.607388	1.26216	-3.34805
7100.15	1.19404	-3.75988	2.58362	2.83597	2.44437	6.45015	-3.65323
7100.2	3.33027	1.4281	-0.77331	3.14114	-0.302212	1.26216	-3.04288
7100.25	-0.331842	-1.62365	-0.162958	0.39456	0.002964	3.39839	-0.601471
7100.3	-0.331842	-2.234	0.752569	2.22561	3.3599	1.87251	-3.34805
7100.35	0.888861	2.03846	3.49915	4.66702	-1.52292	-0.263718	-2.7377
7100.4	4.2458	-0.40295	-0.162958	0.089385	2.13919	4.61909	-1.21182
7100.45	1.49921	0.207401	-1.68884	0.39456	0.30814	-0.568893	1.53476
7100.5	0.583686	1.4281	-0.77331	4.36184	-1.21774	-0.263718	-2.43253
7100.55	1.49921	0.207401	0.142218	2.53079	1.52884	0.346634	-1.21182
7100.6	4.85615	-1.62365	1.05774	0.699736	-4.87985	-2.39995	0.619232
7100.65	3.63544	-0.40295	-1.99401	2.53079	-1.82809	1.87251	2.75546
7100.7	0.583686	-1.0133	-1.38366	4.66702	-0.912563	-1.48442	-0.906647
7100.75	0.27851	-4.67541	-0.468134	-0.215791	-2.74362	-1.17925	-2.12735
7100.8	2.10956	-2.84436	2.27845	0.39456	1.22367	4.00874	-1.82217
7100.85	4.55097	-0.097775	-1.07848	4.9722	-1.82809	-0.263718	-0.601471
7100.9	0.888861	-4.98059	-0.468134	2.83597	-0.912563	-0.263718	-3.04288
7100.95	-0.942193	-4.37024	1.97327	0.699736	3.3599	4.31392	-3.9584
7101	-0.637017	0.512577	1.05774	1.61526	-1.21774	0.346634	-3.65323
7101.05	2.71992	-3.45471	-0.468134	5.27737	0.613316	0.65181	-1.517
7101.1	3.63544	-3.75988	3.19398	1.61526	3.05472	4.31392	-4.26358
7101.15	-1.24737	-1.92883	2.58362	1.00491	0.002964	0.041458	-5.48428
7101.2	-1.55255	-1.62365	0.447393	2.83597	2.13919	0.956985	-5.78946
7101.25	-1.55255	-4.06506	3.19398	3.14114	0.918491	4.92427	-2.43253
7101.3	0.888861	-2.234	-0.468134	-0.215791	0.002964	0.346634	-3.04288
7101.35	1.49921	0.817753	0.142218	1.00491	2.74955	1.26216	-5.48428
7101.4	-1.85772	-2.84436	1.6681	2.83597	-0.912563	5.53462	-3.04288
7101.45	-2.1629	-1.0133	-1.07848	1.92044	-2.13327	0.956985	-1.517
7101.5	-1.55255	2.03846	2.27845	-1.13132	3.05472	1.56734	-2.12735
7101.55	1.80439	-0.097775	-2.60436	-0.215791	-0.912563	5.8398	-3.65323
7101.6	1.49921	-2.53918	0.752569	1.92044	-0.607388	1.87251	-1.517
7101.65	0.27851	0.512577	-1.99401	0.699736	4.27543	1.87251	-1.517
7101.7	-1.55255	2.64881	0.142218	-2.35202	-0.302212	4.31392	-4.87393
7101.75	0.583686	-2.53918	-1.38366	-1.74167	2.13919	2.17769	-0.296295
7101.8	0.888861	-3.75988	-1.07848	1.31009	6.10648	-0.263718	-3.65323
7101.85	3.02509	-0.40295	-0.77331	-0.826143	0.30814	3.09322	-4.87393
7101.9	2.10956	0.207401	-1.07848	-2.35202	1.83402	3.09322	-1.517
7101.95	-0.637017	-4.37024	1.05774	-1.13132	6.10648	-0.263718	-5.48428
7102	0.27851	-3.14953	-1.07848	1.00491	1.22367	1.26216	-2.7377
7102.05	0.583686	-0.097775	2.8888	1.31009	2.13919	5.8398	-4.56876
7102.1	3.33027	-1.62365	-1.99401	-1.13132	5.19095	1.26216	-3.65323
7102.15	3.94062	-1.92883	3.49915	-0.520967	0.918491	2.48286	-3.04288
7102.2	1.49921	-1.62365	-0.468134	2.53079	0.918491	7.67085	-4.56876
7102.25	-0.637017	1.73328	3.19398	2.22561	3.3599	2.78804	-1.21182
7102.3	0.27851	-1.62365	-1.38366	-1.13132	-2.13327	2.78804	-4.87393
7102.35	2.41474	-1.0133	2.8888	-1.43649	-0.302212	4.92427	0.008881
7102.4	3.63544	0.207401	-0.77331	0.089385	1.22367	5.22945	-4.87393
7102.45	-0.026666	2.64881	1.05774	1.31009	-3.65915	1.26216	0.314056
7102.5	-0.637017	-0.40295	-2.90954	0.39456	-3.04879	1.26216	-5.17911
7102.55	1.49921	-1.0133	0.142218	-0.520967	0.918491	4.61909	-0.601471
7102.6	3.63544	-0.097775	-2.29919	0.39456	-2.43844	0.346634	-4.87393
7102.65	-1.24737	2.95398	-3.82507	3.75149	-2.13327	0.041458	-0.296295
7102.7	-0.637017	0.207401	-1.68884	3.14114	2.74955	2.17769	-5.17911
7102.75	4.2458	0.817753	-3.21472	1.00491	-0.302212	3.09322	-0.296295
7102.8	-0.331842	2.34363	1.36292	1.31009	-1.21774	-1.48442	-3.65323
7102.85	-1.24737	4.47986	-3.21472	3.75149	2.13919	-0.263718	1.53476
7102.9	2.71992	0.207401	-0.468134	6.1929	0.613316	3.70357	-3.34805
7102.95	-1.55255	-0.097775	-0.162958	3.44632	0.002964	1.56734	1.22958
7103	0.27851	1.73328	-0.162958	2.53079	1.83402	0.346634	-3.9584
7103.05	2.71992	2.34363	5.63538	3.44632	3.05472	0.65181	-1.21182
7103.1	-0.331842	-0.708126	0.447393	4.66702	-1.21774	4.31392	-3.34805
7103.15	3.63544	-1.62365	4.1095	5.58255	-0.607388	0.346634	-2.7377
7103.2	-0.026666	-0.40295	1.6681	2.22561	3.66507	1.26216	-3.04288
7103.25	2.41474	1.12293	0.447393	0.699736	-1.52292	2.78804	-5.17911
7103.3	3.02509	-0.40295	3.49915	-0.215791	-2.43844	4.61909	0.008881
7103.35	-0.026666	-2.53918	-1.99401	3.44632	0.30814	1.26216	-3.9584
7103.4	4.85615	-1.92883	-0.162958	4.66702	-0.912563	2.17769	1.22958
7103.45	-0.026666	0.817753	-2.29919	1.61526	-2.74362	4.00874	-3.04288
7103.5	2.10956	0.207401	-3.82507	1.61526	-0.302212	4.00874	-0.296295
7103.55	-0.942193	-1.92883	0.447393	2.53079	2.13919	0.956985	-0.296295
7103.6	-0.026666	-3.14953	-3.82507	5.58255	-2.43844	0.65181	-1.517
7103.65	-0.637017	-3.45471	-0.77331	1.31009	-1.21774	3.39839	3.36581
7103.7	-2.46807	-1.31848	0.752569	0.699736	2.74955	1.87251	-0.601471
7103.75	0.888861	-4.06506	-2.29919	4.66702	-0.912563	-0.263718	1.22958
7103.8	-1.55255	-5.89611	3.19398	3.14114	-2.74362	0.041458	0.314056
7103.85	3.63544	-4.67541	0.447393	2.22561	-0.607388	4.00874	-1.517
7103.9	-0.942193	-2.53918	0.142218	5.88772	2.13919	3.09322	3.06064
7103.95	1.80439	-0.708126	4.41468	3.44632	-3.04879	0.041458	-1.517
7104	2.10956	-2.53918	-1.07848	3.14114	-3.04879	1.56734	0.314056
7104.05	1.19404	-2.234	1.05774	8.02395	0.918491	4.31392	-3.04288
7104.1	5.4665	-1.62365	2.8888	3.14114	-0.302212	4.31392	-3.65323
7104.15	-0.331842	1.12293	-1.99401	4.66702	-3.04879	1.26216	0.924408
7104.2	1.49921	2.64881	1.36292	3.75149	-1.52292	0.65181	-4.56876
7104.25	1.80439	-1.0133	-1.38366	1.92044	2.44437	2.78804	-1.21182
7104.3	-0.026666	-2.53918	-1.99401	4.9722	-0.302212	4.00874	-0.906647
7104.35	2.41474	-2.53918	1.6681	0.699736	-2.74362	0.041458	-2.7377
7104.4	0.888861	-0.097775	-2.29919	4.9722	-0.607388	0.65181	1.53476
7104.45	0.583686	-0.097775	-1.38366	0.39456	1.52884	1.87251	-3.65323
7104.5	5.77167	-4.37024	2.27845	3.75149	-1.82809	3.70357	-1.21182
7104.55	-0.331842	-4.67541	-2.60436	0.089385	-0.607388	0.65181	0.619232
7104.6	0.888861	-3.45471	0.142218	2.22561	-0.607388	0.041458	-3.04288
7104.65	3.02509	-2.53918	1.36292	1.92044	2.13919	0.65181	0.924408
7104.7	-2.1629	-1.0133	-2.29919	3.44632	-2.43844	3.09322	-1.517
7104.75	-0.026666	-3.75988	0.752569	3.44632	-3.04879	3.70357	-1.21182
7104.8	-0.331842	-7.11682	-0.162958	2.83597	-2.43844	0.041458	2.45029
7104.85	-2.46807	-6.20129	-2.90954	4.36184	-0.302212	0.041458	-3.34805
7104.9	0.583686	-5.28576	0.142218	1.92044	-3.96432	1.56734	-0.906647
7104.95	-0.026666	-3.14953	0.142218	6.49808	-2.43844	4.00874	0.924408
7105	-0.942193	-3.75988	-1.38366	2.53079	-2.13327	2.78804	-3.34805
7105.05	1.80439	-7.11682	1.36292	7.10843	0.002964	-0.874069	-1.517
7105.1	0.27851	-6.50647	-0.162958	2.53079	-2.13327	1.56734	-2.43253
7105.15	0.583686	-7.42199	-1.38366	5.58255	-2.13327	0.956985	-3.04288
7105.2	3.02509	-4.67541	1.97327	1.61526	-0.302212	3.70357	0.619232
7105.25	1.19404	-1.62365	-1.07848	2.53079	2.74955	2.78804	-4.56876
7105.3	0.27851	-2.84436	-1.68884	4.66702	-0.607388	0.65181	-4.56876
7105.35	2.71992	-6.81164	1.36292	1.31009	-1.82809	1.26216	0.924408
7105.4	-0.942193	-6.50647	-1.38366	5.88772	-1.52292	2.48286	-3.65323
7105.45	-1.55255	-5.28576	-2.90954	0.39456	0.613316	6.75533	-1.517
7105.5	0.27851	-2.84436	-0.468134	3.44632	0.613316	5.22945	0.924408
7105.55	-1.24737	-2.234	-0.162958	1.92044	-1.82809	2.48286	-2.43253
7105.6	-1.85772	-4.67541	-1.99401	0.39456	-1.21774	2.78804	0.008881
7105.65	0.27851	-4.98059	1.36292	4.36184	0.002964	3.70357	1.53476
7105.7	0.888861	-1.92883	0.752569	-1.13132	3.3599	6.75533	-0.906647
7105.75	-1.55255	1.4281	-1.38366	1.61526	-0.607388	5.22945	0.008881
7105.8	0.888861	-2.53918	1.6681	0.699736	-0.607388	2.48286	0.619232
7105.85	2.10956	-3.45471	1.97327	-0.520967	-0.912563	2.17769	-2.43253
7105.9	-2.1629	-1.62365	-0.77331	2.83597	2.13919	3.09322	-2.43253
7105.95	-0.331842	-1.62365	-0.162958	-0.520967	3.05472	4.61909	-1.82217
7106	2.10956	-4.98059	2.8888	1.00491	0.613316	4.92427	-4.26358
7106.05	-2.1629	-2.84436	-2.29919	3.44632	-0.607388	2.17769	-1.517
7106.1	-1.85772	-1.62365	-1.38366	0.089385	0.30814	0.956985	-3.34805
7106.15	2.10956	-4.06506	3.49915	3.75149	3.05472	2.17769	-4.87393
7106.2	-2.77325	0.207401	-1.07848	2.53079	2.44437	1.56734	-2.43253
7106.25	-3.3836	-4.37024	-1.07848	0.699736	-0.912563	3.39839	-2.12735
7106.3	0.888861	-2.84436	1.6681	4.9722	-0.302212	4.61909	-4.56876
7106.35	-1.24737	0.512577	0.752569	1.31009	0.30814	1.56734	-2.12735
7106.4	-2.46807	-3.14953	-0.77331	2.22561	3.05472	0.346634	-1.82217
7106.45	-0.942193	1.12293	1.36292	4.36184	0.002964	0.346634	-3.65323
7106.5	1.19404	-3.45471	1.6681	1.00491	-2.43844	2.17769	-0.296295
7106.55	-1.85772	-1.0133	-2.29919	2.83597	-1.21774	4.31392	1.22958
7106.6	-0.026666	-0.708126	-1.99401	5.88772	1.52884	5.22945	-3.04288
7106.65	2.10956	-2.53918	2.27845	4.05667	-0.607388	1.56734	0.008881
7106.7	-0.637017	2.03846	-3.51989	7.10843	-3.96432	-0.568893	1.83994
7106.75	-1.55255	-2.84436	-3.82507	6.49808	-3.04879	0.956985	-3.9584
7106.8	0.583686	1.4281	-2.60436	4.9722	1.22367	0.956985	-3.04288
7106.85	1.19404	-2.53918	-1.99401	8.32913	-3.35397	2.78804	0.008881
7106.9	-3.3836	0.207401	-5.9613	4.36184	-2.74362	5.22945	-4.87393
7106.95	-1.85772	1.4281	-4.74059	4.05667	0.30814	3.09322	-5.17911
7107	1.19404	-1.0133	0.447393	6.49808	-4.57467	-0.568893	-1.517
7107.05	-2.46807	2.64881	-4.74059	2.22561	-0.912563	-1.48442	-3.65323
7107.1	-3.3836	-2.53918	-5.65612	1.31009	0.30814	-1.17925	-4.87393
7107.15	-1.55255	1.4281	-3.82507	5.27737	-1.82809	2.48286	-2.7377
7107.2	-0.637017	-1.31848	-2.90954	1.61526	3.05472	4.00874	-2.43253
7107.25	-3.99395	-2.234	-6.26647	1.61526	-1.82809	0.956985	-4.56876
7107.3	-3.99395	1.12293	-5.04577	5.58255	2.13919	0.346634	-2.12735
7107.35	-0.637017	-3.45471	-1.68884	1.00491	-1.21774	2.48286	0.924408
7107.4	-1.85772	-0.097775	-3.21472	2.22561	0.002964	6.45015	-2.12735
7107.45	-3.68878	-0.708126	-5.9613	5.58255	0.613316	0.65181	-2.7377
7107.5	-3.3836	-2.84436	-4.74059	1.61526	-2.13327	2.17769	1.83994
7107.55	0.27851	0.207401	-1.07848	2.53079	1.52884	4.61909	-0.296295
7107.6	-2.77325	-4.06506	-4.74059	4.9722	-3.35397	2.48286	-2.43253
7107.65	-3.07842	-2.84436	-5.65612	0.39456	3.3599	0.956985	0.619232
7107.7	-0.637017	-1.31848	-3.51989	2.22561	-2.13327	4.61909	2.14511
7107.75	2.10956	-5.59094	-1.68884	5.88772	2.74955	1.26216	-1.21182
7107.8	-2.77325	-4.98059	-4.74059	1.92044	-1.21774	0.346634	-0.296295
7107.85	-2.46807	-3.45471	-4.74059	2.83597	2.13919	4.61909	3.06064
7107.9	-0.942193	-8.6427	-3.21472	6.1929	-0.912563	0.346634	1.53476
7107.95	-0.026666	-6.20129	-1.99401	2.83597	0.918491	3.09322	-0.906647
7108	-2.77325	-4.98059	-5.65612	2.22561	-0.912563	4.61909	-0.601471
7108.05	-3.3836	-8.94787	-5.35095	6.49808	-1.82809	3.09322	1.22958
7108.1	-2.1629	-7.11682	-3.21472	4.05667	0.002964	6.75533	-1.82217
7108.15	0.27851	-6.50647	-1.38366	3.44632	-1.82809	1.87251	-2.43253
7108.2	-2.77325	-8.6427	-4.43542	6.1929	0.918491	3.39839	-0.601471
7108.25	-1.85772	-6.81164	-3.21472	7.10843	-2.74362	3.39839	0.619232
7108.3	-0.942193	-5.59094	-1.68884	4.9722	0.918491	0.956985	-3.34805
7108.35	2.71992	-8.03234	1.97327	6.1929	-2.13327	6.14497	-2.7377
7108.4	-1.24737	-4.98059	-1.68884	8.63431	-1.82809	0.956985	1.22958
7108.45	-2.1629	-5.59094	-3.51989	4.66702	0.002964	4.61909	-0.296295
7108.5	-1.24737	-6.50647	-1.99401	4.9722	-1.52292	2.48286	-2.43253
7108.55	3.33027	-4.67541	0.752569	8.63431	3.66507	1.87251	-2.12735
7108.6	0.583686	-2.84436	-1.38366	3.75149	-1.52292	4.92427	2.14511
7108.65	-1.55255	-6.20129	-3.82507	3.44632	-1.21774	1.26216	0.314056
7108.7	-0.026666	-4.06506	-3.82507	4.9722	0.918491	4.92427	-2.12735
7108.75	2.10956	-2.53918	-1.07848	4.05667	0.002964	0.65181	-0.601471
7108.8	3.02509	-6.81164	0.142218	0.699736	3.97025	1.26216	2.45029
7108.85	0.888861	-4.67541	-3.82507	2.22561	-0.607388	4.92427	0.314056
7108.9	1.19404	-1.31848	-2.60436	5.88772	0.30814	0.346634	-2.12735
7108.95	3.02509	-5.28576	-1.68884	1.31009	2.74955	2.17769	-0.601471
7109	4.2458	-5.89611	0.142218	2.22561	-0.607388	2.17769	2.14511
7109.05	1.80439	-0.40295	-2.60436	4.66702	1.52884	1.56734	1.83994
7109.1	-0.331842	-5.59094	-5.04577	4.36184	-1.52292	5.22945	-1.517
7109.15	-0.331842	-5.59094	-3.51989	3.14114	-2.13327	1.26216	-1.21182
7109.2	-0.026666	-2.84436	-0.468134	4.05667	1.52884	1.26216	1.83994
7109.25	1.49921	-4.98059	-4.13024	7.4136	-3.35397	5.8398	2.45029
7109.3	-0.637017	-5.28576	-5.65612	2.83597	-1.82809	1.87251	-1.82217
7109.35	-2.1629	-2.53918	-1.68884	3.14114	1.83402	2.78804	-1.517
7109.4	-1.24737	-1.92883	-0.77331	6.1929	-2.74362	7.67085	-1.21182
7109.45	1.49921	-5.28576	-3.82507	7.10843	0.30814	3.39839	1.83994
7109.5	2.71992	-2.84436	-1.07848	2.83597	-1.52292	4.31392	-3.65323
7109.55	0.888861	0.207401	-0.77331	3.75149	-1.21774	8.58638	-3.9584
7109.6	-0.026666	-4.37024	-2.90954	7.4136	1.83402	3.09322	-1.82217
7109.65	0.583686	-3.75988	0.142218	4.66702	-3.35397	4.31392	0.619232
7109.7	3.33027	-1.31848	-5.35095	2.83597	-3.35397	8.2812	-3.04288
7109.75	3.94062	-2.234	-1.99401	4.05667	0.918491	4.00874	-3.9584
7109.8	0.888861	-5.59094	-1.99401	6.49808	-2.43844	2.78804	-1.21182
7109.85	-0.942193	-5.28576	-3.51989	2.22561	-1.52292	6.14497	1.22958
7109.9	-0.026666	-1.92883	1.6681	0.699736	1.83402	4.00874	-3.65323
7109.95	2.41474	-6.20129	-1.38366	1.92044	-2.74362	3.39839	-3.04288
7110	6.07685	-6.20129	3.19398	5.58255	-0.302212	5.8398	0.008881
7110.05	2.10956	-3.75988	-2.29919	1.00491	1.83402	4.31392	-3.34805
7110.1	0.583686	-2.84436	1.6681	1.31009	-3.04879	2.48286	-1.21182
7110.15	2.41474	-5.28576	-3.82507	2.22561	-0.607388	4.31392	0.314056
7110.2	2.71992	-4.67541	0.142218	5.27737	1.52884	5.22945	-1.82217
7110.25	3.63544	-0.097775	-3.21472	2.83597	-2.74362	1.56734	2.75546
7110.3	3.33027	-3.14953	-2.29919	1.31009	-0.607388	1.56734	-0.906647
7110.35	-0.026666	-4.37024	-4.13024	3.44632	-0.302212	5.53462	0.008881
7110.4	-1.24737	-2.53918	-2.29919	7.4136	-3.04879	0.65181	-0.906647
7110.45	0.888861	-0.40295	-3.82507	4.9722	-0.607388	0.346634	-2.43253
7110.5	1.19404	-4.37024	-2.90954	2.53079	-0.912563	5.22945	0.924408
7110.55	5.16132	-3.45471	-2.90954	4.66702	-2.74362	2.17769	-2.43253
7110.6	2.41474	-1.92883	-3.82507	8.02395	-0.302212	0.65181	0.314056
7110.65	0.583686	-1.31848	-2.60436	5.27737	1.22367	3.09322	-2.43253
7110.7	0.888861	-4.98059	-5.35095	3.14114	-1.52292	3.09322	1.53476
7110.75	1.49921	-4.67541	-3.21472	3.44632	0.613316	1.26216	-3.9584
7110.8	3.63544	-2.234	-5.9613	5.88772	2.13919	2.48286	0.924408
7110.85	-0.637017	-2.53918	-1.07848	7.10843	-1.82809	6.45015	-3.9584
7110.9	-1.55255	-4.67541	-5.9613	3.75149	-0.302212	1.56734	2.45029
7110.95	0.27851	-3.45471	-1.68884	3.75149	1.52884	2.17769	-3.04288
7111	2.10956	-1.92883	-4.43542	5.58255	-3.04879	4.92427	2.45029
7111.05	-1.55255	-1.31848	-1.99401	8.32913	-1.82809	4.61909	-3.34805
7111.1	-0.637017	-3.45471	-1.99401	4.36184	1.52884	2.48286	2.14511
7111.15	1.80439	-3.45471	-4.74059	1.61526	-3.96432	2.78804	-3.34805
7111.2	-1.55255	0.512577	-0.162958	2.53079	-3.65915	7.67085	0.619232
7111.25	1.49921	-0.097775	-4.74059	4.05667	2.13919	3.39839	-3.65323
7111.3	2.41474	-3.75988	-2.29919	5.88772	-2.13327	2.48286	-1.517
7111.35	-0.331842	-1.92883	-5.04577	0.699736	-2.43844	4.31392	-3.34805
7111.4	3.33027	-0.097775	-4.74059	1.31009	0.002964	4.61909	-1.82217
7111.45	-0.637017	2.03846	-1.38366	2.22561	-0.302212	1.87251	-3.65323
7111.5	0.888861	-2.53918	-5.35095	4.36184	-1.52292	1.26216	-2.7377
7111.55	1.80439	-2.234	-2.29919	1.92044	0.918491	3.09322	0.008881
7111.6	-0.942193	-0.708126	-5.35095	-0.520967	1.83402	3.39839	-3.65323
7111.65	2.71992	2.34363	-4.74059	0.39456	-1.82809	-0.263718	1.83994
7111.7	-2.46807	-2.234	-0.77331	2.53079	-0.607388	0.65181	-3.34805
7111.75	-0.637017	-4.06506	-5.35095	5.88772	3.05472	4.31392	1.22958
7111.8	-3.07842	-3.45471	-2.29919	3.44632	-1.82809	2.48286	-2.12735
7111.85	-1.55255	-1.0133	-2.90954	2.53079	-1.82809	1.56734	-2.12735
7111.9	-0.637017	-1.0133	-2.90954	4.66702	1.22367	3.09322	-0.906647
7111.95	-2.77325	-4.98059	1.6681	7.4136	1.22367	6.14497	-3.04288
7112	2.41474	-4.06506	-1.99401	4.66702	-3.35397	2.48286	2.14511
7112.05	-2.1629	-2.234	-0.468134	2.53079	-1.52292	2.17769	-3.65323
7112.1	2.71992	0.512577	1.97327	4.9722	3.97025	2.78804	-0.906647
7112.15	-0.637017	-3.45471	-1.07848	5.58255	-0.912563	6.45015	-1.82217
7112.2	0.583686	-4.67541	2.8888	1.00491	-0.912563	2.78804	-2.7377
7112.25	0.888861	-4.37024	-0.77331	4.05667	1.22367	1.56734	0.619232
7112.3	-1.24737	-1.31848	-1.07848	2.53079	2.74955	2.78804	-3.9584
7112.35	3.63544	-0.097775	3.49915	1.31009	-0.302212	5.22945	-0.601471
7112.4	-2.77325	-3.75988	-2.29919	6.1929	0.613316	3.09322	-1.21182
7112.45	-0.026666	-2.84436	-0.468134	1.61526	4.5806	2.17769	-3.65323
7112.5	0.27851	-1.92883	1.05774	3.75149	1.83402	2.78804	0.008881
7112.55	-1.24737	-0.708126	-2.29919	4.66702	0.30814	4.31392	-3.65323
7112.6	3.02509	0.512577	0.447393	2.53079	2.13919	1.87251	-2.12735
7112.65	-1.55255	-1.92883	-0.162958	6.1929	5.19095	-0.874069	-3.34805
7112.7	0.583686	-1.62365	-1.07848	2.22561	0.30814	0.041458	-5.17911
7112.75	3.02509	-1.92883	3.80433	5.88772	-0.302212	1.87251	-0.296295
7112.8	-0.637017	0.207401	0.447393	0.699736	1.52884	3.09322	-5.17911
7112.85	2.41474	0.817753	1.97327	3.14114	1.52884	0.041458	-3.65323
7112.9	2.10956	-2.234	5.33021	0.699736	-2.43844	0.65181	-0.601471
7112.95	0.583686	-3.14953	0.752569	3.14114	-1.82809	1.56734	-4.26358
7113	4.85615	-2.84436	2.27845	3.14114	0.002964	4.92427	-1.21182
7113.05	1.49921	-0.40295	4.41468	2.22561	-0.607388	1.26216	-2.43253
7113.1	0.583686	0.817753	-0.468134	4.66702	-4.57467	-0.874069	-4.26358
7113.15	5.16132	-1.62365	0.752569	1.61526	-3.04879	0.041458	-0.601471
7113.2	0.888861	-4.67541	2.27845	5.88772	-1.21774	2.17769	-3.65323
7113.25	0.27851	-4.98059	-2.90954	0.39456	-1.52292	3.39839	-3.04288
7113.3	3.94062	-3.75988	-0.77331	4.36184	-3.96432	0.346634	-0.296295
7113.35	-1.55255	-1.92883	1.36292	1.31009	-4.2695	0.65181	-4.26358
7113.4	-0.026666	-1.0133	-2.29919	5.27737	-1.21774	2.17769	-0.906647
7113.45	2.10956	-4.67541	0.447393	1.31009	0.918491	4.61909	-0.601471
7113.5	-3.3836	-4.37024	0.752569	3.14114	-2.43844	4.61909	-2.12735
7113.55	-0.637017	-3.14953	-2.29919	3.75149	-2.13327	2.48286	1.83994
7113.6	1.49921	-2.53918	-0.162958	3.44632	0.002964	2.17769	-0.906647
7113.65	-2.77325	-1.0133	-0.162958	7.4136	3.66507	3.39839	-0.296295
7113.7	-0.637017	-0.097775	-3.21472	4.05667	-0.607388	5.8398	3.36581
7113.75	2.71992	-2.84436	-2.29919	8.32913	-1.21774	3.70357	-1.517
7113.8	-1.24737	-4.37024	-1.07848	3.75149	-0.607388	0.65181	-0.601471
7113.85	0.888861	-4.67541	-3.21472	4.9722	2.44437	1.56734	2.14511
7113.9	4.85615	-3.14953	-2.29919	6.1929	-0.912563	1.56734	-2.12735
7113.95	-0.026666	-2.234	-1.07848	3.14114	-4.57467	3.70357	-2.43253
7114	1.49921	-7.11682	-5.35095	7.71878	-2.43844	2.17769	0.619232
7114.05	4.85615	-7.42199	-3.21472	3.75149	-1.21774	-1.48442	-3.65323
7114.1	-0.942193	-4.98059	-1.38366	3.44632	0.002964	-1.17925	-1.517
7114.15	-0.331842	-1.92883	-5.04577	5.88772	-2.74362	0.346634	-1.82217
7114.2	2.41474	-4.98059	-2.90954	3.14114	-3.65915	1.56734	-4.87393
7114.25	-2.77325	-4.06506	1.36292	5.88772	-0.607388	2.17769	-1.21182
7114.3	-3.3836	0.512577	-3.21472	3.44632	2.13919	-0.568893	-1.82217
7114.35	0.583686	-2.53918	-3.21472	2.83597	0.918491	-1.48442	-4.56876
7114.4	-1.24737	-1.92883	1.36292	6.80325	-1.82809	-0.874069	-1.82217
7114.45	-1.85772	1.4281	-1.68884	1.92044	-0.912563	0.041458	-2.12735
7114.5	0.583686	-3.45471	-1.68884	3.14114	0.918491	3.39839	-3.65323
7114.55	-0.637017	-2.53918	0.752569	4.05667	2.13919	0.956985	-0.906647
7114.6	-0.637017	-1.0133	-0.77331	0.39456	0.30814	-1.48442	0.008881
7114.65	1.19404	-2.84436	-1.68884	4.36184	-1.21774	-1.7896	-1.82217
7114.7	3.02509	0.512577	0.447393	4.05667	-0.607388	-0.568893	1.22958
7114.75	-0.637017	-4.06506	1.97327	2.22561	0.30814	0.65181	2.45029
7114.8	-0.942193	-2.84436	-1.38366	6.49808	0.918491	2.78804	-1.517
7114.85	2.71992	-1.31848	-1.07848	2.53079	-1.52292	1.87251	-0.296295
7114.9	-0.637017	-4.98059	2.8888	3.44632	-1.82809	-0.874069	0.008881
7114.95	-0.942193	0.207401	-2.60436	6.80325	-0.912563	0.346634	-4.56876
7115	0.583686	-3.75988	-3.51989	1.92044	1.52884	0.956985	-3.34805
7115.05	0.27851	-1.31848	0.142218	4.36184	-1.52292	2.78804	-1.517
7115.1	-1.24737	-4.98059	0.752569	6.80325	-1.82809	4.31392	-4.26358
7115.15	-0.331842	-4.37024	-2.90954	2.22561	2.74955	3.39839	-3.34805
7115.2	3.63544	-3.45471	-1.68884	4.05667	-1.21774	1.56734	-0.601471
7115.25	-1.24737	-4.98059	2.58362	4.9722	-1.82809	0.65181	-5.17911
7115.3	-2.1629	-1.0133	0.142218	1.61526	2.44437	0.65181	-3.9584
7115.35	-1.24737	-5.59094	-1.68884	4.66702	-1.52292	0.956985	0.314056
7115.4	-1.24737	-1.92883	1.36292	3.14114	-0.607388	3.09322	-2.12735
7115.45	-3.68878	-2.53918	2.27845	1.31009	2.44437	2.78804	-3.34805
7115.5	-2.1629	-1.92883	-1.38366	4.36184	-1.21774	-0.568893	-2.12735
7115.55	0.583686	2.34363	-0.468134	4.05667	1.83402	-0.263718	-2.12735
7115.6	-3.07842	-1.0133	2.27845	2.53079	-2.13327	-0.263718	-3.04288
7115.65	-3.07842	1.4281	1.05774	5.58255	-0.912563	2.17769	-2.7377
7115.7	-1.24737	-0.097775	-1.99401	4.9722	0.002964	1.26216	0.924408
7115.75	1.80439	-2.234	-1.68884	4.05667	-2.43844	-2.70512	-3.9584
7115.8	-1.85772	2.95398	0.752569	4.66702	1.22367	-0.263718	-3.04288
7115.85	-0.331842	-1.92883	-3.51989	4.36184	-2.74362	0.956985	-0.601471
7115.9	2.41474	-1.62365	-2.90954	2.53079	2.13919	-3.0103	-3.34805
7115.95	3.02509	0.512577	-1.99401	5.27737	-1.52292	-3.0103	-2.43253
7116	-0.637017	-3.45471	0.142218	2.83597	3.3599	0.346634	-0.906647
7116.05	1.19404	-0.708126	-3.51989	1.61526	-0.912563	-2.70512	0.314056
7116.1	4.55097	-1.62365	-2.60436	4.66702	2.13919	-0.874069	-3.9584
7116.15	2.41474	-3.75988	-0.77331	4.05667	0.002964	0.956985	-2.7377
7116.2	0.583686	0.817753	0.142218	1.31009	2.44437	-3.0103	1.22958
7116.25	1.19404	-1.92883	-3.21472	4.05667	1.22367	1.26216	-1.517
7116.3	5.77167	-1.62365	-2.60436	4.36184	0.613316	-1.7896	-1.82217
7116.35	1.80439	2.03846	-1.68884	1.61526	2.13919	-1.7896	-0.906647
7116.4	-0.942193	-0.708126	1.05774	3.75149	-0.607388	2.78804	2.14511
7116.45	0.27851	-1.0133	-2.60436	6.1929	2.13919	-1.17925	-2.7377
7116.5	3.02509	3.56433	-2.60436	1.00491	-2.13327	2.78804	-2.43253
7116.55	1.19404	-0.097775	-0.468134	2.22561	3.05472	2.17769	0.008881
7116.6	-1.85772	-1.31848	2.58362	5.88772	-1.52292	2.48286	-0.906647
7116.65	-1.24737	2.95398	-2.60436	0.39456	0.613316	4.61909	-3.9584
7116.7	0.888861	-2.234	-2.29919	0.39456	0.002964	0.956985	-4.87393
7116.75	-0.026666	-2.53918	-0.77331	4.36184	-1.82809	5.8398	-0.601471
7116.8	-2.46807	0.512577	2.27845	1.61526	4.5806	0.346634	-3.34805
7116.85	-2.1629	-3.14953	-0.77331	0.39456	-0.912563	2.17769	-4.87393
7116.9	1.19404	-2.234	-1.68884	2.83597	2.74955	3.09322	-4.26358
7116.95	1.80439	0.817753	-0.162958	4.66702	0.918491	0.041458	-2.12735
7117	-1.55255	-2.53918	2.27845	0.39456	0.002964	4.61909	-3.34805
7117.05	-2.46807	-2.84436	1.97327	2.22561	4.5806	-1.17925	-4.87393
7117.1	-0.637017	1.12293	-1.38366	5.27737	-1.82809	1.56734	-4.26358
7117.15	1.80439	-0.40295	-1.07848	1.92044	1.52884	1.56734	-0.601471
7117.2	-3.68878	-2.84436	1.05774	2.53079	0.613316	-2.09477	-4.26358
7117.25	-4.6043	-0.40295	3.49915	5.58255	-0.912563	2.48286	-4.87393
7117.3	-4.29913	-1.0133	0.752569	4.36184	3.05472	-2.09477	-1.82217
7117.35	0.27851	-4.67541	-1.07848	1.61526	-0.607388	-1.7896	-0.601471
7117.4	-0.331842	-1.92883	-1.07848	3.75149	0.30814	4.00874	-3.65323
7117.45	-2.46807	-1.0133	1.97327	8.02395	3.3599	-0.568893	-4.56876
7117.5	-1.55255	-5.28576	-1.07848	3.75149	-0.302212	0.65181	-3.65323
7117.55	0.583686	-3.75988	-1.99401	2.53079	1.52884	4.61909	-1.21182
7117.6	3.63544	0.817753	-0.468134	4.66702	0.30814	0.346634	-3.04288
7117.65	0.888861	-3.14953	2.8888	5.88772	-0.607388	0.65181	-5.17911
7117.7	-1.55255	-3.14953	-1.99401	0.699736	2.74955	4.61909	-3.65323
7117.75	-1.24737	-0.097775	-0.162958	0.699736	-1.52292	0.346634	-0.601471
7117.8	0.888861	-1.31848	5.02503	4.05667	-2.13327	2.17769	-0.601471
7117.85	2.71992	-4.37024	-1.38366	1.92044	2.13919	4.31392	-2.7377
7117.9	-0.942193	-2.84436	-0.162958	0.39456	-1.82809	-0.568893	-1.21182
7117.95	-1.55255	-0.40295	1.36292	1.00491	-0.912563	0.956985	0.619232
7118	0.583686	-4.37024	-1.38366	6.49808	1.83402	5.22945	1.83994
7118.05	2.10956	-4.37024	2.58362	3.14114	-2.43844	0.346634	-2.7377
7118.1	3.33027	0.207401	-1.07848	2.53079	0.002964	2.17769	-1.517
7118.15	-0.637017	-2.53918	1.05774	4.66702	-0.912563	5.53462	0.619232
7118.2	-1.24737	-3.45471	1.05774	7.4136	-2.74362	0.041458	-0.906647
7118.25	-0.942193	-2.234	-0.468134	3.75149	0.30814	1.87251	-3.34805
7118.3	-0.026666	-0.40295	3.80433	4.05667	-1.52292	4.31392	-1.21182
7118.35	2.41474	-4.37024	-0.468134	6.1929	-2.74362	0.346634	-0.601471
7118.4	-0.026666	-4.37024	4.41468	7.71878	0.30814	0.956985	-4.56876
7118.45	-2.1629	-0.40295	-0.77331	3.44632	-0.912563	4.61909	-1.21182
7118.5	-0.637017	-3.14953	4.41468	3.75149	-1.21774	0.346634	-3.65323
7118.55	-0.026666	-3.45471	-2.29919	3.14114	1.83402	-0.263718	-3.9584
7118.6	2.71992	-1.92883	2.8888	4.9722	-0.607388	2.48286	0.008881
7118.65	1.80439	1.73328	-1.68884	1.61526	-1.21774	3.09322	-4.56876
7118.7	-1.55255	-1.92883	2.58362	0.39456	3.66507	-0.874069	1.22958
7118.75	-3.07842	-2.53918	-3.51989	1.31009	1.22367	1.26216	-3.65323
7118.8	-3.07842	1.4281	0.447393	4.36184	0.30814	4.92427	-1.21182
7118.85	-1.24737	2.95398	-2.29919	1.61526	3.05472	1.56734	-2.7377
7118.9	0.27851	-0.708126	0.142218	1.31009	0.002964	0.65181	-3.04288
7118.95	-1.55255	0.207401	-1.99401	1.61526	-0.607388	4.00874	-1.517
7119	-3.68878	2.34363	0.752569	4.36184	2.44437	1.26216	-3.04288
7119.05	-2.1629	2.95398	-0.162958	1.61526	-0.912563	0.65181	-1.517
7119.1	0.583686	0.207401	1.6681	0.39456	-1.21774	1.56734	-4.56876
7119.15	2.71992	0.512577	2.8888	1.61526	2.13919	2.78804	-1.21182
7119.2	-0.942193	3.56433	0.447393	3.44632	-0.912563	-1.7896	-4.26358
7119.25	-0.331842	3.25916	4.71985	4.36184	-2.43844	-1.17925	-0.906647
7119.3	2.71992	-0.40295	0.447393	1.31009	2.44437	2.78804	-3.65323
7119.35	3.63544	0.817753	5.02503	2.53079	-0.607388	-0.263718	0.619232
7119.4	-0.331842	3.56433	-0.77331	2.22561	-1.82809	-1.48442	-3.9584
7119.45	2.10956	4.17469	1.6681	6.49808	0.30814	0.346634	0.619232
7119.5	3.02509	0.207401	1.05774	4.36184	-0.607388	2.78804	-4.26358
7119.55	-0.331842	-0.097775	-1.07848	2.53079	-1.21774	-1.7896	1.83994
7119.6	0.888861	1.73328	1.97327	2.53079	1.52884	-1.17925	-3.65323
7119.65	0.583686	2.95398	-2.60436	3.75149	0.30814	3.39839	1.53476
7119.7	-1.24737	-1.31848	1.36292	6.1929	-1.52292	2.17769	-4.87393
7119.75	3.33027	-1.62365	-2.90954	1.92044	1.52884	-0.568893	-0.601471
7119.8	-1.24737	0.512577	-2.29919	0.699736	1.83402	1.56734	-4.56876
7119.85	0.888861	2.03846	0.142218	1.00491	-3.65915	4.92427	-2.12735
7119.9	0.888861	-0.097775	-3.82507	3.75149	-1.52292	1.87251	-3.04288
7119.95	-1.24737	-0.40295	1.6681	4.66702	0.613316	0.346634	-3.9584
7120	2.41474	0.512577	-1.68884	1.00491	-4.2695	1.56734	-0.601471
7120.05	-0.942193	3.86951	-1.38366	0.089385	-4.87985	4.61909	-2.7377
7120.1	2.71992	0.207401	1.36292	-0.520967	-1.52292	0.956985	1.53476
7120.15	-2.46807	0.207401	-2.60436	3.14114	-4.57467	2.17769	-2.43253
7120.2	-0.331842	-0.708126	0.447393	1.61526	-4.57467	2.17769	0.619232
7120.25	-1.55255	2.34363	-2.29919	-2.04685	-0.607388	4.92427	0.008881
7120.3	-2.46807	2.64881	-3.82507	0.699736	-3.65915	0.041458	-1.21182
7120.35	0.583686	-0.40295	1.36292	5.58255	-4.2695	0.65181	3.06064
7120.4	-2.1629	-0.708126	-4.13024	0.39456	-0.607388	1.26216	-0.296295
7120.45	2.41474	-0.708126	-3.51989	1.00491	0.918491	2.78804	1.22958
7120.5	-1.85772	2.64881	-1.68884	4.9722	-2.13327	-0.263718	-1.517
7120.55	1.80439	0.207401	-2.60436	2.83597	-1.21774	-0.874069	-2.43253
7120.6	0.583686	-2.234	1.05774	2.53079	2.13919	-0.568893	1.83994
7120.65	-0.942193	-2.234	-2.60436	6.49808	-0.912563	1.87251	-2.43253
7120.7	4.2458	-1.0133	-1.38366	2.83597	-2.43844	-0.568893	0.619232
7120.75	-0.026666	1.12293	1.6681	4.9722	0.002964	-0.874069	-0.906647
7120.8	3.33027	-1.0133	-0.77331	5.58255	1.22367	0.041458	-1.82217
7120.85	1.19404	-2.53918	1.05774	3.14114	-2.74362	2.17769	3.06064
7120.9	-0.331842	-2.53918	2.8888	8.63431	-3.35397	-0.874069	-0.601471
7120.95	4.55097	-0.097775	-0.162958	0.699736	0.002964	-1.17925	0.619232
7121	-0.331842	1.4281	2.27845	5.58255	-2.43844	-0.874069	0.619232
7121.05	0.888861	-1.31848	1.6681	2.22561	-4.87985	2.48286	-0.906647
7121.1	2.41474	-2.234	-0.77331	2.53079	-3.35397	-0.568893	2.75546
7121.15	-1.24737	-1.62365	4.41468	2.22561	0.613316	-2.09477	-2.12735
7121.2	1.49921	-0.708126	1.05774	2.22561	-2.74362	0.041458	-0.906647
7121.25	1.19404	1.12293	0.752569	4.36184	-1.21774	1.26216	0.924408
7121.3	-0.026666	-0.708126	5.33021	0.39456	0.613316	4.00874	-2.12735
7121.35	5.16132	-1.0133	-0.468134	4.36184	1.52884	-0.263718	0.924408
7121.4	1.49921	-0.708126	1.36292	0.39456	-1.21774	-0.874069	-1.21182
7121.45	2.10956	0.207401	4.1095	4.66702	-0.912563	-0.874069	-2.12735
7121.5	5.16132	2.95398	-1.38366	0.089385	2.13919	1.56734	2.14511
7121.55	0.888861	2.95398	0.447393	5.88772	1.83402	0.346634	-3.65323
7121.6	1.49921	0.817753	1.6681	1.00491	-1.52292	-2.39995	-1.82217
7121.65	3.63544	-1.31848	-1.38366	4.9722	-1.21774	-2.09477	-0.296295
7121.7	-1.24737	0.207401	0.752569	2.22561	1.52884	0.041458	-3.04288
7121.75	-0.026666	1.4281	1.6681	4.36184	0.613316	3.09322	-0.906647
7121.8	3.63544	4.47986	-1.68884	3.44632	-2.43844	0.65181	-2.43253
7121.85	-1.55255	2.95398	0.752569	3.14114	-1.52292	-1.17925	-3.34805
7121.9	-0.942193	-0.097775	1.97327	8.02395	1.22367	1.26216	0.008881
7121.95	2.71992	0.207401	-0.468134	3.14114	1.83402	3.09322	-3.65323
7122	-1.55255	1.12293	3.19398	8.32913	-2.13327	5.8398	-4.56876
7122.05	-0.942193	2.64881	3.49915	3.44632	-1.21774	4.61909	0.008881
7122.1	2.10956	3.86951	0.752569	5.27737	1.83402	2.17769	-3.65323
7122.15	-2.1629	2.64881	1.97327	4.36184	3.05472	3.39839	-2.7377
7122.2	-1.24737	-0.097775	1.97327	1.61526	-1.21774	4.61909	-1.21182
7122.25	2.71992	-0.097775	-0.77331	6.49808	-1.52292	5.8398	-5.78946
7122.3	-1.85772	1.12293	1.05774	2.22561	-0.912563	1.87251	-3.34805
7122.35	-2.46807	2.95398	1.6681	3.44632	2.13919	-1.17925	-0.906647
7122.4	2.41474	-0.097775	-1.38366	4.66702	-1.82809	0.346634	-3.9584
7122.45	-1.85772	-0.097775	-0.468134	3.14114	-3.35397	0.346634	-2.12735
7122.5	-2.1629	2.34363	2.8888	8.02395	-3.04879	1.56734	-1.517
7122.55	1.49921	2.34363	-1.38366	3.75149	0.30814	0.956985	-3.9584
7122.6	-1.24737	-1.62365	-1.38366	3.75149	-1.82809	-0.568893	-1.21182
7122.65	-0.026666	-0.40295	0.752569	6.49808	-4.2695	-0.874069	-1.517
7122.7	2.71992	2.03846	-2.90954	3.44632	-3.35397	0.956985	-4.56876
7122.75	3.02509	-3.14953	-2.60436	6.49808	-2.13327	2.78804	-0.906647
7122.8	-0.331842	-0.40295	0.142218	4.36184	-0.302212	4.61909	-1.21182
7122.85	1.49921	-0.097775	-1.68884	3.75149	-2.43844	2.78804	-4.87393
7122.9	3.33027	-2.234	-2.90954	7.71878	-4.57467	0.041458	-2.43253
7122.95	-1.85772	0.817753	-0.468134	2.83597	-3.04879	0.041458	-1.517
7123	-1.85772	-2.53918	-2.29919	2.53079	-1.52292	0.65181	-4.87393
7123.05	1.80439	-1.31848	-4.13024	5.88772	-0.302212	3.09322	-3.34805
7123.1	-1.55255	-0.708126	-1.68884	1.31009	-3.35397	4.00874	-2.43253
7123.15	-0.637017	-3.45471	-0.162958	3.44632	-2.74362	1.26216	-3.9584
7123.2	1.80439	1.12293	-4.13024	2.53079	-0.912563	-0.568893	-0.601471
7123.25	2.10956	-3.14953	-4.43542	0.699736	1.22367	0.041458	1.53476
7123.3	-0.331842	-1.62365	0.752569	5.27737	-2.13327	0.65181	-2.43253
7123.35	1.19404	-3.14953	-2.29919	2.53079	-2.43844	1.87251	-0.296295
7123.4	2.10956	-4.06506	-3.21472	2.53079	0.30814	4.31392	3.06064
7123.45	-2.77325	-1.92883	-0.77331	7.4136	-0.912563	2.48286	-0.601471
7123.5	-2.1629	-5.28576	-0.77331	4.36184	-2.74362	0.346634	0.008881
7123.55	1.49921	-1.62365	-3.51989	4.66702	0.30814	-0.874069	4.28134
7123.6	-0.637017	-6.81164	-1.99401	10.1602	-1.21774	0.346634	0.008881
7123.65	-2.46807	-4.37024	1.97327	4.66702	-2.74362	-0.263718	-0.296295
7123.7	-0.331842	-4.98059	-1.99401	5.27737	0.30814	2.48286	2.14511
7123.75	3.63544	-4.67541	-2.60436	8.93948	-2.43844	3.70357	-1.21182
7123.8	-0.637017	-2.234	-1.07848	4.66702	-1.21774	0.041458	-1.21182
7123.85	-0.637017	-6.20129	0.142218	4.36184	0.613316	-0.263718	-0.296295
7123.9	1.49921	-2.53918	-2.29919	6.80325	-1.82809	0.346634	0.314056
7123.95	2.41474	-5.59094	-1.07848	4.05667	2.13919	4.00874	-3.04288
7124	0.27851	-6.20129	2.27845	3.75149	-1.82809	2.17769	-1.21182
7124.05	0.888861	-1.92883	0.447393	5.88772	2.44437	-0.568893	2.75546
7124.1	4.2458	-5.59094	-1.99401	1.92044	-2.43844	0.65181	-1.82217
7124.15	0.888861	-3.45471	0.447393	4.9722	-0.912563	3.09322	-1.21182
7124.2	-1.24737	-3.14953	3.19398	6.49808	-2.43844	-0.874069	1.53476
7124.25	-1.24737	-4.37024	-0.77331	1.92044	-2.13327	-2.70512	2.45029
7124.3	1.49921	-1.0133	-1.99401	4.36184	-2.74362	2.17769	0.008881
7124.35	-1.24737	-3.45471	-0.77331	6.49808	-4.57467	-0.263718	1.22958
7124.4	-1.85772	-3.75988	1.6681	2.22561	-1.21774	-0.263718	3.97617
7124.45	-1.55255	1.12293	-2.29919	3.44632	-4.87985	3.39839	-0.906647
7124.5	1.49921	-4.06506	-3.82507	5.88772	-2.13327	-0.874069	0.619232
7124.55	-1.85772	-1.92883	-1.38366	1.00491	-5.79538	1.87251	0.924408
7124.6	-1.85772	1.73328	0.447393	2.53079	0.30814	4.31392	1.83994
7124.65	-0.942193	-3.14953	-3.21472	6.49808	-4.87985	0.956985	-2.43253
7124.7	2.10956	-1.0133	-4.13024	0.089385	0.30814	5.22945	-2.43253
7124.75	-1.55255	1.4281	-1.38366	2.53079	-4.57467	2.48286	0.008881
7124.8	-1.55255	-2.234	1.36292	5.58255	0.002964	3.39839	-1.82217
7124.85	0.888861	-1.62365	-2.60436	1.61526	-2.13327	5.22945	-1.82217
7124.9	2.71992	0.817753	-3.51989	0.39456	-0.607388	2.78804	-0.296295
7124.95	-0.637017	-2.84436	-1.99401	4.36184	-1.82809	7.67085	1.53476
7125	-1.24737	-2.84436	0.447393	2.83597	-1.82809	2.48286	-1.82217
7125.05	-0.026666	-1.0133	-4.43542	0.089385	2.13919	4.31392	-1.21182
7125.1	3.02509	-5.28576	-6.26647	2.22561	-1.21774	2.17769	1.53476
7125.15	-0.331842	-3.75988	-5.9613	3.14114	2.13919	1.87251	3.36581
7125.2	-0.331842	0.512577	-2.90954	0.089385	-1.52292	5.8398	-0.906647
7125.25	-0.331842	-4.67541	-5.35095	1.61526	-1.21774	-0.263718	-0.601471
7125.3	2.10956	-2.53918	-7.48718	6.49808	-0.912563	2.78804	1.53476
7125.35	2.10956	-0.097775	-6.57165	3.44632	-2.74362	0.65181	1.53476
7125.4	-0.026666	-3.45471	-5.35095	4.05667	1.52884	0.346634	-2.12735
7125.45	1.49921	-3.75988	-3.51989	7.71878	-1.82809	4.61909	-2.7377
7125.5	2.41474	-0.40295	-6.26647	8.32913	-0.302212	-0.263718	-0.296295
7125.55	5.4665	-3.45471	-5.65612	5.88772	0.613316	2.17769	0.008881
7125.6	1.19404	-4.37024	-2.90954	7.71878	-1.82809	2.17769	-4.87393
7125.65	0.27851	0.512577	-0.162958	9.24466	3.05472	0.65181	-4.56876
7125.7	1.49921	-2.53918	-3.51989	4.66702	-1.21774	4.00874	-0.906647
7125.75	2.10956	-3.45471	-4.74059	3.14114	-0.912563	0.65181	0.314056
7125.8	3.33027	-0.40295	-4.43542	6.49808	0.30814	1.26216	-3.9584
7125.85	-1.24737	0.817753	-1.07848	4.9722	-3.04879	4.31392	-3.65323
7125.9	-0.942193	-3.45471	-3.82507	2.53079	1.83402	-0.263718	-1.21182
7125.95	-0.331842	-1.92883	-5.9613	3.14114	-1.52292	0.041458	2.14511
7126	2.71992	2.03846	-4.74059	6.1929	-2.13327	4.31392	-1.82217
7126.05	1.80439	-2.53918	-2.90954	3.44632	2.13919	0.65181	-2.12735
7126.1	-1.24737	-2.53918	-5.65612	4.36184	-2.74362	0.956985	-1.21182
7126.15	-0.331842	2.03846	-2.90954	5.88772	0.002964	5.53462	0.924408
7126.2	0.888861	-1.0133	-2.29919	6.80325	1.22367	0.346634	0.314056
7126.25	3.63544	-1.0133	-5.35095	1.92044	-0.912563	2.17769	-2.43253
7126.3	1.49921	1.12293	-1.38366	3.44632	2.13919	6.14497	-1.82217
7126.35	-0.637017	1.12293	-4.74059	7.10843	-0.912563	2.17769	0.924408
7126.4	0.888861	-2.53918	-4.13024	4.05667	-1.52292	1.56734	-0.296295
7126.45	1.80439	-2.84436	-1.68884	1.31009	1.22367	6.14497	-3.65323
7126.5	5.77167	1.12293	-5.04577	1.61526	-2.74362	2.78804	-1.82217
7126.55	3.33027	-2.53918	-0.77331	5.27737	-1.21774	0.956985	1.53476
7126.6	0.888861	-3.14953	-7.48718	1.92044	2.74955	4.92427	-3.65323
7126.65	-0.331842	0.207401	-1.99401	0.699736	-1.82809	1.87251	-3.04288
7126.7	-0.026666	0.817753	-5.9613	2.83597	0.30814	0.956985	0.008881
7126.75	1.80439	-2.84436	-3.21472	5.88772	3.05472	2.78804	-2.43253
7126.8	1.19404	-1.92883	-6.57165	2.83597	-0.607388	2.17769	-0.296295
7126.85	-0.942193	3.56433	-4.13024	1.00491	1.52884	1.56734	1.22958
7126.9	-2.46807	1.73328	-5.35095	3.75149	0.613316	4.61909	-0.906647
7126.95	-0.942193	-1.0133	-4.43542	6.1929	-0.912563	5.22945	2.75546
7127	-0.942193	1.12293	-4.13024	2.53079	0.918491	1.87251	-0.296295
7127.05	1.80439	4.17469	-4.43542	1.31009	0.002964	3.70357	1.83994
7127.1	1.80439	1.12293	-3.51989	2.53079	-1.21774	6.14497	0.314056
7127.15	-1.24737	1.12293	-3.51989	5.27737	2.13919	1.87251	0.619232
7127.2	-0.942193	2.34363	-2.29919	3.44632	0.30814	2.78804	2.45029
7127.25	-0.942193	3.25916	-5.65612	1.92044	-2.13327	5.53462	-0.296295
7127.3	1.80439	-1.31848	-2.60436	2.53079	0.918491	2.17769	2.75546
7127.35	3.33027	-0.097775	-5.65612	4.9722	-0.607388	0.956985	-0.296295
7127.4	-0.331842	0.512577	-1.68884	5.27737	-2.43844	2.78804	3.67099
7127.45	-0.942193	1.12293	-6.26647	1.61526	0.30814	4.00874	-0.601471
7127.5	0.583686	-3.45471	-1.07848	2.22561	-2.43844	0.346634	2.14511
7127.55	3.63544	-2.53918	-5.04577	4.9722	-3.35397	1.56734	-2.12735
7127.6	0.583686	-0.40295	-1.99401	6.80325	0.613316	4.00874	2.45029
7127.65	-0.026666	0.207401	-5.9613	2.22561	-2.43844	0.346634	-3.04288
7127.7	2.41474	-1.31848	-5.9613	1.61526	-2.13327	0.041458	1.83994
7127.75	0.888861	-1.0133	-2.29919	3.44632	0.002964	2.17769	-2.7377
7127.8	-0.331842	0.817753	-6.26647	6.1929	-1.82809	3.39839	0.924408
7127.85	1.19404	1.4281	-1.38366	4.66702	-2.13327	-1.7896	-3.04288
7127.9	-0.026666	-0.40295	-7.48718	1.61526	0.30814	-0.568893	1.22958
7127.95	-0.942193	-0.40295	-4.43542	1.61526	0.30814	3.39839	-3.34805
7128	3.33027	1.12293	-5.35095	3.75149	-0.912563	0.956985	0.008881
7128.05	-1.85772	2.34363	-5.9613	6.80325	0.918491	-1.17925	-3.04288
7128.1	-0.637017	-1.31848	-1.68884	3.44632	2.13919	0.65181	1.53476
7128.15	1.80439	-0.708126	-5.9613	0.699736	-2.13327	4.92427	-1.517
7128.2	-0.637017	1.4281	-2.90954	1.61526	0.30814	0.956985	0.314056
7128.25	4.2458	4.78504	-4.74059	4.05667	3.3599	0.346634	1.83994
7128.3	-0.331842	1.12293	-4.74059	4.66702	-1.52292	2.17769	-0.601471
7128.35	1.19404	0.512577	-0.162958	1.61526	-0.912563	4.00874	3.06064
7128.4	1.19404	2.95398	-4.74059	1.31009	2.74955	0.346634	-2.12735
7128.45	0.888861	5.09021	-2.60436	1.61526	0.002964	0.041458	2.45029
7128.5	2.41474	4.17469	-4.43542	4.36184	-0.912563	2.78804	-1.21182
7128.55	0.583686	1.12293	-5.35095	3.14114	1.52884	3.39839	-0.601471
7128.6	5.77167	2.34363	-1.68884	1.31009	1.52884	0.65181	0.619232
7128.65	-0.637017	3.86951	-5.9613	1.31009	-1.21774	-0.263718	-1.82217
7128.7	3.94062	4.17469	-4.74059	5.88772	1.52884	3.39839	2.45029
7128.75	-0.637017	2.03846	-2.90954	0.699736	3.05472	4.61909	-2.12735
7128.8	1.49921	0.512577	-5.9613	2.22561	0.002964	2.17769	-0.906647
7128.85	1.80439	1.4281	-2.90954	6.80325	-0.302212	3.09322	-1.82217
7128.9	0.27851	2.64881	-5.35095	2.83597	2.44437	5.53462	-3.34805
7128.95	3.94062	2.95398	-5.9613	2.53079	0.30814	4.92427	1.83994
7129	-0.331842	-0.097775	-1.38366	7.4136	-0.912563	2.48286	-4.26358
7129.05	3.02509	-0.40295	-5.9613	1.31009	1.52884	3.39839	-0.601471
7129.1	1.19404	0.817753	-3.82507	4.05667	3.3599	4.92427	-0.601471
7129.15	-0.331842	2.95398	-3.21472	2.22561	-1.52292	6.14497	-2.43253
7129.2	3.02509	1.73328	-6.26647	1.00491	-1.52292	2.48286	1.53476
7129.25	-2.1629	-1.0133	-2.60436	6.1929	1.52884	2.48286	-3.04288
7129.3	0.27851	-1.62365	-4.13024	1.31009	1.22367	3.70357	-0.601471
7129.35	0.27851	-1.0133	-6.26647	3.75149	-1.21774	5.53462	0.314056
7129.4	-1.55255	2.03846	-1.99401	0.089385	-0.912563	2.78804	-2.12735
7129.45	1.80439	1.73328	-3.82507	3.75149	2.74955	1.87251	2.45029
7129.5	-0.942193	-2.53918	-3.82507	1.31009	-1.21774	2.48286	-2.12735
7129.55	-0.942193	-1.62365	0.752569	1.31009	-0.607388	4.61909	-1.82217
7129.6	3.33027	-0.097775	-4.43542	2.83597	0.30814	2.48286	0.008881
7129.65	-0.942193	1.12293	-2.90954	1.61526	2.13919	0.346634	-3.9584
7129.7	0.27851	2.95398	0.447393	5.88772	-2.13327	0.65181	-2.12735
7129.75	2.71992	-0.708126	-3.82507	2.83597	-1.52292	2.78804	-2.43253
7129.8	-1.55255	-1.31848	-0.77331	8.63431	0.002964	2.48286	-2.12735
7129.85	1.19404	-1.0133	0.752569	3.44632	0.918491	0.346634	2.45029
7129.9	3.02509	0.207401	-2.60436	9.54983	-1.82809	0.346634	-2.7377
7129.95	-0.942193	3.25916	0.142218	3.14114	-2.43844	1.56734	-1.21182
7130	1.49921	1.73328	0.142218	7.71878	0.002964	4.00874	2.14511
7130.05	1.19404	0.207401	-1.99401	2.83597	-1.21774	2.17769	-2.12735
7130.1	-0.942193	-0.708126	0.752569	4.05667	-3.65915	-0.568893	1.53476
7130.15	0.888861	-0.40295	1.97327	2.83597	-3.04879	0.346634	1.83994
7130.2	0.27851	0.207401	-2.29919	0.699736	-0.607388	1.26216	-0.296295
7130.25	-1.55255	1.4281	0.752569	4.05667	-0.912563	3.70357	2.75546
7130.3	0.583686	0.207401	1.6681	0.699736	-3.65915	0.956985	0.008881
7130.35	0.27851	-3.14953	-1.07848	4.36184	-2.43844	-1.48442	0.314056
7130.4	-2.1629	-2.53918	0.142218	-0.215791	-0.912563	-1.48442	4.89169
7130.45	-0.331842	-2.84436	-0.162958	1.00491	-0.302212	1.26216	-0.906647
7130.5	-0.026666	-0.40295	-2.60436	3.44632	-3.96432	4.31392	-0.296295
7130.55	-1.85772	-0.40295	-0.77331	1.31009	-3.04879	1.87251	2.45029
7130.6	-0.637017	-4.67541	0.447393	4.05667	-0.607388	-0.263718	-0.906647
7130.65	0.888861	-5.59094	-3.21472	0.39456	1.83402	0.65181	0.619232
7130.7	-1.24737	-4.67541	-1.99401	1.61526	-1.52292	2.17769	2.45029
7130.75	0.888861	-1.92883	0.142218	4.9722	-1.52292	5.8398	-0.601471
7130.8	1.80439	-6.81164	-2.60436	1.92044	0.30814	5.22945	2.45029
7130.85	-2.1629	-5.89611	-0.77331	5.58255	2.44437	2.78804	3.67099
7130.9	-0.637017	-2.84436	2.8888	2.22561	-0.302212	3.39839	0.314056
7130.95	3.02509	-2.84436	-1.38366	2.22561	-1.82809	4.31392	3.06064
7131	-0.942193	-4.98059	-0.77331	5.88772	-1.21774	5.22945	3.67099
7131.05	-0.942193	-2.234	4.1095	0.089385	1.22367	6.14497	0.314056
7131.1	3.02509	-3.14953	-0.77331	3.44632	1.83402	3.09322	2.45029
7131.15	-0.331842	-4.37024	0.447393	2.53079	-1.52292	0.956985	2.14511
7131.2	-0.331842	-1.31848	3.19398	0.699736	-0.607388	0.65181	0.008881
7131.25	2.10956	-3.45471	0.752569	4.9722	1.83402	0.346634	2.45029
7131.3	0.583686	-3.45471	-0.77331	0.39456	3.66507	3.09322	1.83994
7131.35	-0.942193	-0.40295	1.6681	1.61526	2.44437	1.87251	-0.601471
7131.4	0.583686	-5.28576	2.8888	6.1929	-0.607388	-2.09477	0.314056
7131.45	1.49921	-0.40295	-0.77331	0.39456	0.30814	-3.0103	2.14511
7131.5	-1.55255	-2.53918	1.05774	2.83597	1.22367	-1.17925	-0.296295
7131.55	-0.026666	-0.708126	3.19398	4.9722	2.74955	-0.263718	1.53476
7131.6	2.71992	0.512577	-0.162958	1.31009	-0.607388	3.39839	3.06064
7131.65	-1.85772	-0.40295	-1.07848	3.75149	-0.912563	3.70357	-0.601471
7131.7	-1.55255	4.17469	0.752569	3.44632	0.918491	0.65181	0.924408
7131.75	2.10956	-0.097775	-0.162958	1.00491	-1.52292	-0.568893	3.67099
7131.8	2.10956	3.86951	-2.90954	3.75149	-2.74362	0.346634	-1.21182
7131.85	-0.026666	-1.0133	-1.07848	2.22561	0.002964	0.346634	-0.296295
7131.9	1.49921	-0.097775	0.447393	1.00491	0.30814	1.56734	2.45029
7131.95	4.55097	0.207401	-3.51989	4.9722	-1.52292	3.70357	-1.82217
7132	1.19404	-1.31848	-2.60436	2.22561	1.83402	2.17769	-3.04288
7132.05	0.583686	2.64881	0.447393	1.31009	-0.302212	-1.17925	2.14511
7132.1	2.41474	-1.62365	0.447393	5.27737	0.002964	-0.874069	-0.601471
7132.15	3.33027	1.73328	-2.29919	0.39456	2.74955	0.956985	-2.12735
7132.2	-0.331842	1.4281	-0.77331	0.39456	-1.21774	3.09322	0.008881
7132.25	0.583686	0.207401	2.8888	4.36184	2.44437	1.26216	1.83994
7132.3	3.94062	4.47986	0.447393	0.089385	-1.21774	-3.0103	-1.82217
7132.35	0.888861	-0.097775	-1.68884	-0.520967	0.613316	-1.48442	0.008881
7132.4	-0.026666	1.73328	-0.162958	4.9722	0.002964	1.26216	2.45029
7132.45	-0.331842	2.03846	1.6681	-0.215791	0.918491	1.87251	-1.21182
7132.5	2.41474	-0.40295	-2.29919	0.39456	2.13919	0.041458	-1.21182
7132.55	2.10956	2.95398	-2.60436	3.75149	-0.302212	0.65181	2.45029
7132.6	-0.942193	-0.097775	-0.468134	1.00491	2.74955	3.39839	0.008881
7132.65	-0.331842	-1.31848	0.752569	1.61526	0.30814	-0.568893	-1.21182
7132.7	1.19404	3.25916	-2.29919	5.58255	4.27543	0.65181	-0.296295
7132.75	4.55097	-1.62365	-2.60436	1.00491	-0.607388	3.70357	1.53476
7132.8	0.27851	0.817753	0.752569	0.39456	3.97025	0.041458	-3.65323
7132.85	-0.331842	3.25916	1.36292	3.14114	-1.52292	2.78804	-3.65323
7132.9	1.49921	-1.31848	-1.07848	0.089385	2.13919	0.65181	2.45029
7132.95	2.71992	0.512577	-1.07848	-0.826143	-1.82809	-0.568893	-0.601471
7133	4.85615	2.34363	1.36292	1.92044	0.918491	3.39839	-1.82217
7133.05	0.583686	-1.62365	2.27845	1.00491	-3.65915	-0.874069	-1.517
7133.1	-0.026666	0.512577	-1.38366	-1.13132	-1.82809	0.956985	2.14511
7133.15	-0.331842	1.12293	-1.38366	1.00491	-3.04879	0.65181	-1.82217
7133.2	1.19404	-1.31848	1.36292	1.31009	-3.35397	-0.568893	-2.12735
7133.25	2.41474	0.512577	1.05774	-0.520967	-0.607388	4.00874	0.619232
7133.3	-0.637017	2.03846	-1.99401	1.31009	-3.96432	-1.48442	1.22958
7133.35	-2.1629	-0.708126	-1.38366	3.44632	1.52884	1.56734	-1.82217
7133.4	-1.85772	1.12293	0.142218	-0.520967	-3.35397	-0.263718	-1.517
7133.45	0.888861	2.34363	1.97327	0.699736	0.002964	0.65181	0.619232
7133.5	1.80439	-0.708126	-1.68884	5.58255	-0.912563	3.70357	1.22958
7133.55	-3.3836	0.817753	-1.38366	2.53079	-0.302212	-0.568893	-2.43253
7133.6	-3.68878	2.03846	-1.68884	1.61526	2.44437	4.61909	-0.296295
7133.65	-2.77325	-1.62365	2.58362	3.44632	-0.607388	-0.263718	2.45029
7133.7	-0.942193	0.207401	-1.38366	3.44632	3.97025	1.26216	-1.21182
7133.75	0.888861	1.12293	-4.13024	0.699736	0.002964	2.78804	-1.21182
7133.8	-1.24737	-2.234	-3.21472	0.089385	1.22367	0.041458	-0.601471
7133.85	-2.1629	-1.31848	-0.77331	3.44632	2.74955	2.17769	1.83994
7133.9	-0.026666	3.56433	1.36292	-0.826143	-1.21774	1.26216	-0.296295
7133.95	1.80439	-1.31848	-1.68884	-0.826143	2.74955	-1.17925	-1.517
7134	3.02509	-0.097775	-2.29919	2.53079	0.918491	3.70357	-0.601471
7134.05	-0.026666	3.86951	-1.38366	2.22561	-1.21774	-0.263718	2.14511
7134.1	-1.24737	1.12293	1.05774	0.699736	3.66507	0.041458	-0.601471
7134.15	-1.24737	0.207401	-2.29919	2.22561	-0.607388	4.00874	-3.04288
7134.2	0.27851	2.03846	-2.90954	5.88772	0.613316	-1.17925	-2.43253
7134.25	2.41474	2.03846	-2.29919	1.61526	0.30814	1.26216	0.008881
7134.3	1.19404	-0.708126	-1.38366	1.31009	-2.13327	4.00874	-1.82217
7134.35	-1.24737	0.817753	-4.43542	3.75149	2.44437	-0.263718	-3.65323
7134.4	-1.24737	2.03846	-3.21472	4.05667	-2.13327	1.56734	-2.43253
7134.45	-0.026666	-3.14953	0.142218	0.39456	-1.21774	2.78804	0.924408
7134.5	3.02509	-1.92883	-3.82507	0.699736	2.13919	-0.874069	1.53476
7134.55	3.63544	2.64881	-1.38366	4.36184	-1.52292	-0.263718	-1.21182
7134.6	0.27851	-2.53918	-0.162958	1.92044	1.22367	0.65181	-0.601471
7134.65	0.27851	-2.234	-3.51989	0.699736	1.83402	-3.92583	0.008881
7134.7	0.888861	0.512577	0.142218	2.83597	-1.52292	-1.7896	3.06064
7134.75	2.71992	0.512577	-3.51989	6.49808	0.613316	1.56734	-0.906647
7134.8	3.94062	-2.84436	-2.90954	2.83597	-1.21774	-2.70512	-0.906647
7134.85	4.2458	-1.92883	-2.90954	1.00491	-1.21774	-0.874069	2.14511
7134.9	1.49921	2.95398	-3.82507	2.22561	1.83402	4.92427	0.924408
7134.95	0.583686	-1.0133	0.752569	6.49808	-3.04879	0.346634	-1.517
7135	1.49921	-2.53918	-2.60436	3.14114	-1.82809	0.956985	0.008881
7135.05	1.80439	-0.097775	2.8888	1.92044	3.05472	4.92427	0.314056
7135.1	4.2458	1.4281	-0.77331	3.14114	-2.13327	2.48286	-1.82217
7135.15	2.71992	-1.62365	3.49915	7.10843	-0.302212	1.56734	1.53476
7135.2	-0.026666	-0.097775	-1.38366	3.44632	3.3599	4.00874	-2.12735
7135.25	-3.07842	4.17469	3.49915	3.14114	-0.912563	2.48286	-2.43253
7135.3	-1.85772	0.512577	-2.60436	3.75149	0.613316	0.041458	0.314056
7135.35	-0.637017	-0.708126	1.6681	6.49808	2.44437	1.26216	-2.7377
7135.4	1.49921	1.12293	-2.90954	2.53079	-1.21774	2.78804	1.53476
7135.45	1.80439	2.34363	1.6681	2.53079	1.22367	-1.7896	-2.7377
7135.5	0.27851	-1.31848	-3.51989	2.22561	1.52884	-1.48442	0.619232
7135.55	-1.85772	-1.62365	0.447393	6.1929	-1.52292	3.39839	-3.9584
7135.6	-2.1629	0.817753	-1.38366	3.14114	0.918491	-0.568893	-1.82217
7135.65	-0.942193	1.12293	0.752569	1.00491	1.52884	-1.17925	-3.04288
7135.7	1.49921	-2.234	-0.77331	0.699736	-0.912563	2.78804	-1.21182
7135.75	1.80439	-1.62365	-0.162958	2.22561	1.22367	2.48286	-2.43253
7135.8	-0.026666	0.207401	0.752569	4.36184	1.83402	-0.568893	-1.82217
7135.85	-1.55255	1.4281	-1.38366	0.39456	-0.607388	0.956985	-1.517
7135.9	-1.24737	-3.45471	2.27845	0.699736	2.13919	4.31392	-1.82217
7135.95	2.41474	-0.708126	-1.07848	2.22561	1.83402	0.65181	0.008881
7136	-1.55255	1.12293	2.8888	5.58255	-0.607388	2.17769	-1.21182
7136.05	-1.85772	2.64881	-1.07848	3.14114	1.22367	4.31392	0.008881
7136.1	-0.331842	-0.40295	3.19398	2.53079	0.613316	3.70357	-2.7377
7136.15	1.19404	-0.708126	0.752569	3.14114	-3.04879	0.956985	-1.21182
7136.2	-1.55255	2.64881	0.752569	5.58255	-3.04879	2.48286	-4.26358
7136.25	0.583686	4.17469	4.41468	6.80325	-0.302212	4.92427	-0.906647
7136.3	2.10956	0.817753	0.752569	3.44632	-3.96432	-1.17925	-4.26358
7136.35	-1.24737	1.4281	4.41468	2.53079	-2.74362	-0.874069	0.619232
7136.4	3.02509	2.95398	-0.162958	3.14114	0.30814	0.65181	-4.87393
7136.45	2.41474	5.09021	0.752569	5.88772	-3.65915	1.56734	-0.296295
7136.5	1.49921	0.207401	2.58362	5.27737	-3.04879	-2.70512	-4.87393
7136.55	6.07685	-0.40295	-0.468134	1.61526	1.52884	-1.7896	-1.517
7136.6	0.888861	0.207401	4.41468	3.44632	-2.43844	1.87251	-3.65323
7136.65	3.33027	3.56433	0.142218	5.58255	-3.35397	1.56734	-2.12735
7136.7	3.94062	-0.40295	0.752569	7.4136	-1.82809	-2.09477	-0.296295
7136.75	1.19404	-3.45471	1.36292	5.58255	-1.82809	-1.48442	-2.43253
7136.8	5.4665	-1.62365	-3.21472	2.83597	-5.79538	3.39839	3.36581
7136.85	0.583686	-0.708126	1.36292	4.36184	-2.43844	1.26216	-2.43253
7136.9	3.63544	-0.708126	-2.29919	6.1929	0.613316	-1.17925	1.53476
7136.95	0.583686	-4.37024	-3.21472	4.9722	-3.35397	-0.874069	-0.601471
7137	-0.637017	-4.67541	0.447393	1.61526	-3.04879	2.17769	-0.296295
7137.05	4.2458	-2.53918	-3.51989	1.00491	0.30814	1.87251	2.75546
7137.1	-1.55255	0.817753	0.447393	4.9722	0.002964	0.041458	-0.296295
7137.15	1.80439	-0.40295	-0.162958	0.699736	-1.21774	1.26216	3.06064
7137.2	-0.026666	-3.14953	-0.77331	1.31009	1.52884	3.09322	0.008881
7137.25	0.583686	-2.234	3.49915	5.88772	3.3599	2.17769	0.314056
7137.3	4.55097	-0.097775	-1.38366	1.61526	-0.607388	-0.568893	1.22958
7137.35	0.888861	0.512577	1.36292	3.75149	1.22367	-1.17925	0.008881
7137.4	3.02509	-2.53918	2.8888	4.36184	3.97025	1.87251	1.83994
7137.45	3.33027	-4.98059	-0.162958	2.53079	0.613316	1.87251	-1.21182
7137.5	1.80439	-4.37024	2.27845	7.71878	-1.21774	-1.48442	-1.82217
7137.55	5.16132	-4.06506	1.36292	1.31009	0.002964	-0.874069	1.83994
7137.6	1.19404	-1.62365	-1.07848	3.14114	1.83402	0.346634	-2.43253
7137.65	0.583686	-3.75988	1.97327	1.92044	-3.35397	2.48286	1.53476
7137.7	3.94062	-5.28576	-0.77331	1.61526	-2.74362	-0.874069	0.008881
7137.75	-0.026666	-3.75988	-2.29919	4.05667	-0.912563	-1.7896	-1.21182
7137.8	-1.24737	-2.234	1.6681	1.31009	-0.912563	0.041458	3.67099
7137.85	3.02509	1.73328	-3.82507	5.88772	-3.65915	2.17769	-1.21182
7137.9	-0.331842	-0.40295	-2.60436	2.53079	-3.04879	0.346634	0.314056
7137.95	0.583686	-2.234	1.05774	8.93948	2.13919	-1.7896	0.619232
7138	3.63544	-0.40295	-2.90954	3.14114	-0.607388	-1.48442	-2.7377
7138.05	-1.24737	-0.097775	-0.77331	7.10843	-1.82809	0.346634	-0.296295
7138.1	-0.331842	2.03846	-0.162958	2.83597	-0.912563	1.87251	-3.34805
7138.15	4.2458	1.73328	-1.38366	5.27737	3.3599	-1.7896	-3.9584
7138.2	-0.331842	-0.708126	2.27845	3.14114	-0.302212	-2.09477	1.22958
7138.25	-0.942193	-0.708126	1.6681	2.53079	-0.302212	-1.48442	-4.56876
7138.3	2.41474	0.207401	-0.162958	2.22561	2.13919	0.956985	-2.12735
7138.35	-0.331842	1.73328	1.6681	2.22561	3.97025	-0.874069	-1.21182
7138.4	-1.24737	2.64881	0.447393	4.9722	1.22367	-3.0103	-3.65323
7138.45	2.10956	-0.40295	-2.29919	0.699736	1.52884	-2.70512	-0.601471
7138.5	-0.026666	-1.31848	1.05774	5.27737	2.13919	0.346634	-1.21182
7138.55	-0.637017	-2.234	-0.77331	2.22561	5.49613	2.17769	-3.04288
7138.6	1.80439	-2.234	-1.07848	6.1929	1.22367	0.956985	1.53476
7138.65	1.80439	-1.0133	1.05774	1.31009	0.613316	-1.7896	-0.906647
7138.7	-1.85772	0.512577	-1.07848	2.53079	-0.302212	-1.17925	0.619232
7138.75	0.888861	-2.234	-0.77331	5.58255	3.3599	0.346634	3.97617
7138.8	3.63544	-4.67541	3.19398	3.44632	0.002964	3.09322	0.008881
7138.85	-0.942193	-2.84436	-0.162958	7.71878	-1.52292	0.956985	0.924408
7138.9	-0.637017	-3.14953	-1.07848	4.36184	-1.82809	-0.874069	3.06064
7138.95	3.94062	0.817753	1.6681	5.27737	0.918491	0.346634	-2.7377
7139	1.49921	-1.0133	0.752569	5.88772	0.002964	1.56734	0.008881
7139.05	0.888861	-2.234	0.447393	3.14114	-3.35397	3.09322	1.83994
7139.1	3.33027	-0.097775	1.97327	7.10843	-2.13327	3.70357	-2.43253
7139.15	3.33027	3.86951	1.6681	0.699736	-0.912563	0.65181	-1.21182
7139.2	0.27851	0.512577	-0.468134	1.92044	1.22367	0.956985	-0.601471
7139.25	1.49921	0.207401	2.27845	4.36184	-0.912563	0.956985	-3.34805
7139.3	5.16132	3.56433	1.97327	0.39456	-0.302212	2.78804	-1.21182
7139.35	1.80439	2.34363	-2.29919	4.05667	0.613316	5.22945	-0.906647
7139.4	1.49921	1.12293	-0.162958	3.44632	3.3599	3.09322	-2.7377
7139.45	4.55097	3.86951	2.27845	2.83597	1.22367	0.956985	-0.906647
7139.5	4.85615	0.817753	-2.60436	6.1929	-1.21774	1.87251	0.314056
7139.55	2.10956	2.03846	-2.60436	1.00491	-0.912563	4.61909	-1.21182
7139.6	3.33027	6.61609	2.27845	3.44632	0.002964	5.8398	0.924408
7139.65	6.99238	1.12293	-1.07848	5.58255	1.83402	7.97603	1.83994
7139.7	3.63544	3.86951	-0.468134	1.31009	-1.21774	4.00874	0.008881
7139.75	2.41474	2.03846	2.58362	4.66702	-3.35397	2.17769	2.14511
7139.8	5.16132	1.4281	0.752569	3.75149	-2.43844	2.17769	1.83994
7139.85	6.99238	5.09021	-1.99401	1.92044	1.52884	2.48286	-0.601471
7139.9	1.49921	0.512577	-0.468134	6.49808	1.22367	4.00874	0.314056
7139.95	1.19404	3.56433	1.36292	1.92044	-1.52292	5.53462	3.06064
7140	3.02509	-1.0133	-2.90954	1.92044	-0.912563	3.70357	-2.12735
7140.05	3.33027	1.4281	-2.60436	5.58255	3.3599	0.956985	-1.517
7140.1	-0.026666	-0.40295	0.447393	1.00491	0.613316	0.041458	3.06064
7140.15	-0.026666	-1.31848	-3.82507	1.92044	0.30814	-0.568893	-1.517
7140.2	3.33027	2.34363	-4.13024	4.66702	4.27543	1.26216	-1.82217
7140.25	1.49921	-1.31848	-1.07848	1.00491	-0.607388	2.48286	2.45029
7140.3	-0.637017	2.34363	-0.162958	2.53079	0.613316	2.17769	-1.82217
7140.35	-0.331842	-2.84436	-5.35095	4.05667	4.27543	-1.17925	-2.43253
7140.4	4.2458	-0.097775	-4.43542	1.00491	-0.912563	0.346634	0.008881
7140.45	1.80439	1.12293	-1.38366	2.83597	3.05472	1.26216	-1.21182
7140.5	-1.24737	-1.0133	-4.13024	4.66702	1.52884	4.31392	-3.9584
7140.55	-0.637017	4.17469	-4.74059	1.31009	0.002964	5.8398	-0.906647
7140.6	2.41474	-0.40295	-3.21472	4.36184	3.05472	1.56734	1.83994
7140.65	0.888861	2.34363	-0.468134	4.36184	-0.607388	2.48286	-2.7377
7140.7	-0.942193	3.25916	-3.82507	2.83597	3.97025	4.00874	-1.21182
7140.75	-0.331842	0.512577	-2.29919	5.27737	-3.04879	5.53462	2.75546
7140.8	3.02509	3.56433	0.447393	4.9722	0.30814	1.26216	0.008881
7140.85	1.19404	0.512577	1.6681	2.53079	-4.2695	0.956985	-2.12735
7140.9	-1.55255	0.817753	-1.38366	4.36184	-0.912563	4.31392	0.924408
7140.95	-0.637017	4.17469	-2.60436	4.66702	-2.74362	-0.568893	2.75546
7141	1.80439	-0.40295	-0.77331	0.39456	-1.21774	-1.48442	-1.21182
7141.05	1.49921	1.73328	-3.82507	3.44632	-0.302212	2.48286	-0.296295
7141.1	-1.55255	4.47986	-5.65612	4.9722	0.613316	-2.70512	3.36581
7141.15	-0.637017	0.512577	-5.9613	1.61526	2.74955	-3.0103	0.924408
7141.2	-0.026666	2.34363	-3.82507	3.14114	1.22367	1.26216	0.314056
7141.25	3.02509	4.47986	-5.9613	4.36184	3.97025	-1.7896	2.14511
7141.3	-1.24737	-0.097775	-6.26647	1.31009	0.30814	1.56734	2.45029
7141.35	-1.24737	1.73328	-3.82507	2.83597	3.66507	1.26216	-2.12735
7141.4	-0.637017	0.817753	0.752569	5.27737	0.30814	-0.263718	-2.12735
7141.45	1.49921	-1.92883	-1.07848	1.00491	4.5806	4.00874	2.45029
7141.5	1.49921	1.12293	-1.38366	1.61526	-0.607388	0.041458	-1.21182
7141.55	-2.46807	-0.40295	0.752569	6.49808	3.05472	3.09322	-3.04288
7141.6	-2.46807	-2.53918	4.71985	2.22561	-1.21774	1.26216	-1.82217
7141.65	-0.942193	0.207401	1.97327	1.31009	0.30814	0.65181	2.45029
7141.7	2.10956	0.207401	0.752569	6.1929	-0.302212	3.09322	-1.82217
7141.75	-0.331842	-1.62365	0.447393	3.75149	-0.912563	0.346634	-1.82217
7141.8	-1.55255	-0.708126	3.49915	2.53079	3.3599	3.70357	0.008881
7141.85	-0.637017	-0.40295	1.6681	4.36184	-1.82809	-0.568893	2.45029
7141.9	1.49921	-2.84436	-2.29919	5.27737	3.05472	1.26216	-1.82217
7141.95	5.16132	-0.40295	-1.99401	1.92044	-0.607388	2.48286	-3.04288
7142	1.80439	-0.097775	-0.468134	2.83597	0.918491	-1.7896	0.008881
7142.05	0.27851	-3.14953	0.447393	6.1929	3.3599	2.78804	1.53476
7142.1	1.19404	-0.097775	-2.90954	2.22561	-0.302212	-0.568893	-1.517
7142.15	3.33027	2.03846	-1.99401	2.53079	2.74955	1.56734	-1.21182
7142.2	4.2458	-2.234	-0.468134	6.49808	-1.82809	3.39839	-0.296295
7142.25	-0.331842	-1.31848	3.80433	4.66702	-1.21774	0.041458	2.14511
7142.3	-1.55255	3.86951	1.36292	2.22561	0.918491	3.39839	-1.21182
7142.35	-0.026666	-1.31848	-0.468134	3.44632	-2.74362	1.26216	-1.21182
7142.4	0.888861	-0.097775	1.05774	6.80325	0.30814	0.346634	-0.601471
7142.45	1.80439	3.86951	3.80433	2.83597	-1.82809	4.92427	2.75546
7142.5	-1.85772	-0.40295	2.27845	3.14114	-2.43844	0.041458	-0.601471
7142.55	-2.46807	0.512577	-1.38366	5.27737	2.44437	0.65181	-3.04288
7142.6	-1.55255	3.25916	-0.77331	4.9722	-1.21774	5.22945	-1.517
7142.65	-0.637017	1.4281	3.19398	2.53079	2.13919	-0.263718	1.53476
7142.7	2.71992	-0.40295	-2.29919	2.53079	2.44437	1.26216	0.314056
7142.75	1.19404	1.4281	-1.38366	6.80325	0.30814	4.00874	-3.34805
7142.8	-0.637017	4.78504	3.19398	3.75149	4.27543	-1.7896	-1.82217
7142.85	0.27851	-1.0133	-1.68884	2.22561	1.22367	-0.263718	1.22958
7142.9	1.19404	0.512577	-0.468134	3.75149	1.52884	3.09322	2.45029
7142.95	3.02509	4.17469	2.8888	4.36184	4.88578	-0.263718	-3.04288
7143	5.16132	0.817753	0.142218	1.61526	-0.607388	0.346634	-2.7377
7143.05	3.63544	-0.708126	4.1095	1.31009	1.22367	3.09322	-0.601471
7143.1	0.583686	0.817753	1.97327	3.44632	3.05472	-1.17925	1.22958
7143.15	1.19404	3.25916	2.27845	4.05667	-1.52292	0.041458	-2.7377
7143.2	1.80439	-0.40295	3.49915	1.00491	1.52884	4.92427	-2.7377
7143.25	2.10956	0.817753	1.97327	1.92044	1.52884	0.956985	1.22958
7143.3	3.94062	4.47986	6.55091	4.9722	-0.607388	0.346634	-2.43253
7143.35	0.27851	2.03846	2.27845	4.66702	2.13919	4.00874	-1.517
7143.4	-1.55255	1.73328	6.55091	1.00491	-0.912563	1.56734	3.67099
7143.45	-1.85772	4.17469	0.142218	2.53079	-0.302212	0.956985	-0.601471
7143.5	-1.55255	5.70057	4.71985	7.4136	3.05472	1.87251	0.619232
7143.55	0.27851	1.12293	-1.99401	4.9722	-1.21774	0.346634	3.36581
7143.6	1.80439	1.12293	3.49915	3.14114	-1.82809	-1.17925	-0.906647
7143.65	2.71992	3.56433	-1.68884	3.75149	2.44437	0.346634	3.06064
7143.7	1.49921	2.03846	1.05774	5.58255	-2.43844	0.041458	-1.517
7143.75	0.27851	-1.62365	-3.51989	4.36184	-1.21774	-2.70512	0.619232
7143.8	1.19404	0.207401	-1.99401	1.61526	2.74955	-1.17925	-0.906647
7143.85	1.80439	2.95398	-3.21472	1.92044	-2.74362	1.56734	-0.906647
7143.9	3.33027	-0.40295	-2.29919	4.36184	-1.82809	-3.0103	1.22958
7143.95	3.02509	-1.92883	-3.51989	4.36184	1.83402	-4.231	-1.21182
7144	0.583686	0.512577	-3.21472	1.31009	-4.2695	0.956985	2.75546
7144.05	-1.85772	4.78504	-1.38366	2.22561	-1.52292	-0.568893	-0.906647
7144.1	-1.55255	-0.097775	-0.77331	4.05667	0.918491	-2.39995	2.45029
7144.15	-0.331842	0.207401	2.8888	5.88772	-3.35397	-0.874069	-2.12735
7144.2	2.41474	1.73328	-0.468134	3.14114	-1.21774	1.56734	2.45029
7144.25	-0.026666	5.39539	3.80433	1.61526	0.613316	-1.7896	-2.7377
7144.3	-0.942193	1.4281	-1.68884	3.75149	-2.13327	-1.7896	0.924408
7144.35	0.888861	1.12293	1.05774	5.27737	-1.21774	1.87251	-3.34805
7144.4	2.41474	2.95398	-2.60436	3.44632	1.52884	0.346634	0.314056
7144.45	-0.637017	6.00574	-1.99401	1.31009	-3.04879	-1.7896	-4.56876
7144.5	-0.026666	2.64881	-0.468134	0.699736	-1.21774	0.956985	-0.296295
7144.55	4.2458	2.03846	-1.99401	3.44632	3.3599	1.56734	-3.9584
7144.6	-0.942193	4.17469	2.27845	4.9722	-1.52292	-2.39995	1.53476
7144.65	0.583686	5.39539	-2.60436	2.53079	-0.302212	-0.263718	-3.65323
7144.7	3.33027	3.25916	0.142218	2.53079	2.74955	2.17769	1.22958
7144.75	-0.026666	0.207401	0.142218	1.61526	-0.912563	0.956985	-2.43253
7144.8	1.19404	1.73328	-2.60436	4.36184	0.002964	-2.39995	1.22958
7144.85	1.19404	4.78504	1.97327	4.9722	3.3599	-0.874069	-0.601471
7144.9	-0.331842	3.25916	-2.90954	3.44632	0.613316	3.09322	0.008881
7144.95	3.94062	-0.40295	0.752569	2.22561	-0.607388	0.346634	0.619232
7145	-1.85772	0.817753	0.142218	2.53079	1.83402	-0.568893	-1.21182
7145.05	-0.331842	1.73328	-3.21472	5.27737	0.918491	1.56734	3.36581
7145.1	1.19404	3.56433	1.97327	4.66702	-2.43844	4.61909	-3.34805
7145.15	-1.24737	0.512577	-3.82507	2.53079	0.002964	0.956985	0.619232
7145.2	3.33027	-0.097775	-2.29919	2.22561	3.3599	0.956985	-2.7377
7145.25	-1.55255	0.817753	-1.38366	4.66702	-2.13327	1.87251	-2.7377
7145.3	2.10956	3.56433	-4.13024	6.1929	-1.82809	4.00874	-0.296295
7145.35	-0.026666	2.34363	-0.468134	3.44632	2.44437	-0.568893	-3.65323
7145.4	-0.026666	-1.0133	-3.21472	4.05667	-1.21774	0.346634	1.22958
7145.45	3.33027	0.207401	-3.82507	7.4136	-1.52292	3.09322	-3.34805
7145.5	-0.942193	2.34363	0.752569	3.44632	0.613316	4.92427	-2.43253
7145.55	2.41474	3.56433	-3.21472	3.44632	2.74955	0.956985	-2.12735
7145.6	0.888861	0.817753	-1.99401	6.49808	-0.912563	1.87251	-3.65323
7145.65	-1.85772	-1.0133	-1.07848	1.31009	0.002964	1.56734	1.83994
7145.7	3.94062	0.207401	-3.21472	3.14114	3.05472	4.61909	-3.65323
7145.75	-1.55255	3.56433	0.142218	6.1929	0.30814	0.65181	-0.906647
7145.8	0.27851	3.25916	-2.60436	2.83597	-0.912563	-0.263718	-0.296295
7145.85	0.888861	0.207401	-3.21472	7.10843	1.83402	0.956985	-1.517
7145.9	-2.1629	-1.0133	1.36292	2.22561	1.83402	3.70357	2.75546
7145.95	1.19404	-0.097775	-2.90954	4.66702	-2.43844	0.346634	-2.12735
7146	-0.637017	1.73328	-2.60436	4.05667	-1.21774	-0.263718	0.008881
7146.05	-2.1629	2.95398	0.142218	3.44632	0.918491	0.041458	1.83994
7146.1	1.49921	-0.708126	-4.43542	5.88772	-1.52292	2.48286	-2.12735
7146.15	-0.026666	-1.31848	-1.68884	2.53079	-2.74362	0.956985	0.924408
7146.2	0.27851	-0.097775	-1.38366	7.4136	-0.607388	-1.17925	-1.82217
7146.25	5.16132	0.512577	-3.82507	3.75149	1.83402	-1.7896	-1.82217
7146.3	1.19404	3.86951	-1.68884	6.80325	-1.52292	1.56734	2.14511
7146.35	0.583686	0.817753	-2.60436	2.83597	-1.52292	1.56734	-3.04288
7146.4	6.07685	-1.31848	-2.60436	6.49808	0.002964	-1.7896	-0.906647
7146.45	2.41474	-0.708126	2.27845	2.22561	2.74955	-1.17925	0.314056
7146.5	1.49921	0.207401	-1.68884	4.05667	-0.607388	0.346634	-0.906647
7146.55	4.2458	2.03846	-1.99401	0.699736	-1.21774	4.31392	3.36581
7146.6	1.80439	1.73328	3.49915	2.83597	2.44437	1.26216	-0.601471
7146.65	1.80439	-2.234	-0.468134	2.22561	2.74955	-1.7896	-0.906647
7146.7	1.80439	-3.14953	-1.07848	1.31009	-1.52292	-1.17925	3.06064
7146.75	0.583686	-1.92883	2.58362	2.83597	-3.04879	1.26216	-0.296295
7146.8	-1.55255	0.512577	-3.51989	-0.520967	-0.302212	3.70357	0.619232
7146.85	0.888861	2.95398	-2.90954	4.05667	0.002964	1.26216	2.45029
7146.9	1.49921	2.03846	1.6681	-0.215791	-3.96432	-0.568893	-1.82217
7146.95	-1.24737	-0.097775	-1.99401	3.44632	-3.04879	-0.263718	0.619232
7147	1.80439	0.207401	-1.99401	-0.215791	-1.82809	2.48286	-1.21182
7147.05	3.94062	0.817753	2.58362	0.089385	0.613316	4.31392	-2.43253
7147.1	-0.637017	2.03846	-1.07848	2.83597	-3.04879	-0.568893	1.53476
7147.15	-0.331842	4.47986	-2.29919	-1.43649	-2.43844	-0.568893	-2.12735
7147.2	3.63544	1.73328	2.27845	4.36184	-1.21774	-0.874069	-3.34805
7147.25	-0.637017	-1.0133	-1.68884	-1.74167	0.30814	0.346634	0.008881
7147.3	-0.637017	-1.0133	-2.90954	-0.215791	-2.74362	0.956985	-3.9584
7147.35	1.49921	0.817753	0.447393	1.31009	-2.43844	-1.7896	-2.43253
7147.4	0.888861	2.95398	-3.21472	-0.826143	-1.21774	-2.70512	0.619232
7147.45	-1.85772	-1.31848	-2.60436	4.66702	0.918491	-1.7896	-3.34805
7147.5	0.583686	-1.31848	0.752569	1.92044	-1.82809	-0.263718	-2.12735
7147.55	2.41474	1.4281	-1.38366	1.61526	-3.96432	1.26216	2.14511
7147.6	-1.24737	0.207401	-3.82507	4.66702	-4.57467	-0.263718	-1.82217
7147.65	-0.637017	-2.84436	-0.162958	0.39456	-1.82809	-2.39995	0.008881
7147.7	1.80439	-0.40295	-1.68884	3.44632	-0.912563	-1.48442	2.75546
7147.75	-1.24737	-1.92883	-2.90954	2.53079	-2.74362	-0.263718	-1.21182
7147.8	-2.46807	-4.37024	-1.68884	1.00491	-2.74362	0.65181	0.314056
7147.85	-0.026666	-0.708126	0.142218	5.27737	-0.912563	1.87251	0.924408
7147.9	2.71992	-4.06506	-3.21472	1.61526	2.74955	-0.874069	-2.43253
7147.95	-0.942193	-4.06506	-1.38366	3.14114	0.918491	-1.7896	-0.906647
7148	-1.24737	-1.0133	1.05774	5.27737	-2.43844	-1.48442	0.924408
7148.05	1.80439	-5.59094	-2.90954	1.31009	-2.13327	-0.263718	-2.43253
7148.1	2.71992	-0.708126	-2.60436	3.75149	-0.302212	1.87251	-2.12735
7148.15	-1.24737	-5.28576	0.447393	5.58255	0.613316	1.56734	4.28134
7148.2	-0.026666	-4.67541	-2.90954	2.53079	-2.43844	-1.17925	-0.601471
7148.25	3.33027	-2.234	-5.35095	4.36184	-2.74362	-0.874069	0.924408
7148.3	0.583686	-5.59094	-2.60436	3.75149	0.918491	0.041458	4.28134
7148.35	-0.026666	-1.31848	-0.77331	2.22561	1.52884	1.26216	1.22958
7148.4	0.888861	-5.59094	-5.35095	5.88772	-0.607388	2.48286	2.75546
7148.45	3.02509	-0.40295	-3.82507	1.00491	0.30814	3.70357	6.41757
7148.5	-0.942193	-4.06506	0.447393	1.31009	3.3599	1.87251	2.14511
7148.55	-0.942193	-2.234	-1.38366	5.58255	-0.302212	-0.263718	1.22958
7148.6	0.27851	-1.62365	-2.60436	1.61526	1.22367	-0.568893	2.75546
7148.65	2.10956	-3.45471	-0.162958	2.83597	1.83402	-1.17925	0.924408
7148.7	0.27851	1.73328	1.05774	4.66702	-1.82809	1.56734	-2.43253
7148.75	0.27851	-3.14953	-2.90954	1.00491	3.66507	2.17769	-0.296295
7148.8	2.41474	-0.40295	-1.99401	1.31009	-0.302212	-0.568893	0.619232
7148.85	3.33027	-0.708126	0.447393	4.36184	-0.302212	-2.70512	-3.04288
7148.9	0.888861	-1.0133	-0.77331	0.089385	0.613316	-1.17925	-2.12735
7148.95	-0.331842	3.25916	-3.82507	1.61526	-3.04879	0.346634	2.75546
7149	1.80439	-2.53918	-3.82507	4.05667	2.44437	-0.263718	-1.21182
7149.05	3.33027	0.817753	-0.77331	-1.13132	-2.74362	-3.62065	-1.517
7149.1	-1.55255	0.207401	-4.43542	1.31009	2.13919	-2.09477	1.83994
7149.15	-0.637017	-1.62365	-4.13024	4.66702	-1.82809	0.956985	0.008881
7149.2	1.80439	1.4281	-3.21472	1.31009	1.52884	-2.09477	-2.12735
7149.25	2.71992	-3.45471	-1.38366	3.14114	0.30814	-3.31548	-1.21182
7149.3	1.19404	-1.62365	-5.04577	5.88772	1.22367	0.65181	0.619232
7149.35	0.888861	2.03846	-4.74059	2.22561	1.83402	-0.874069	-4.26358
7149.4	1.80439	-1.92883	-1.99401	3.44632	1.22367	-1.17925	-4.56876
7149.45	3.63544	0.207401	-1.07848	6.1929	2.44437	2.78804	-0.906647
7149.5	1.19404	1.4281	-4.74059	1.00491	-0.912563	-1.48442	-2.12735
7149.55	-0.942193	-2.234	-3.82507	0.699736	0.613316	0.041458	-3.65323
7149.6	-0.942193	-0.40295	-0.77331	5.58255	-1.52292	4.31392	-1.517
7149.65	1.19404	-0.40295	0.447393	0.699736	2.74955	-0.263718	0.314056
7149.7	0.583686	-3.45471	-2.90954	0.699736	-1.21774	2.78804	-3.34805
7149.75	-2.77325	-1.31848	-1.38366	5.58255	3.05472	1.26216	-3.04288
7149.8	-2.1629	-1.0133	0.752569	1.00491	-2.74362	0.956985	-0.906647
7149.85	-0.637017	-4.06506	2.27845	1.31009	1.52884	4.61909	-0.906647
7149.9	0.27851	-0.708126	-1.99401	4.05667	-1.82809	-0.263718	-4.26358
7149.95	-2.46807	-0.097775	-2.29919	3.14114	0.613316	4.31392	-4.87393
7150	-3.68878	-1.92883	0.142218	1.61526	-0.302212	0.041458	-0.906647
7150.05	-1.85772	-0.40295	2.27845	4.36184	-0.607388	0.346634	-4.26358
7150.1	-0.026666	0.207401	-2.29919	5.58255	4.27543	2.17769	-4.87393
7150.15	1.80439	-1.31848	-3.21472	1.00491	-1.21774	0.346634	-3.65323
7150.2	-1.24737	1.73328	-0.468134	3.14114	3.66507	6.45015	-0.296295
7150.25	-1.24737	2.34363	1.97327	6.80325	-0.302212	-0.263718	-4.56876
7150.3	-0.942193	1.12293	-0.77331	2.22561	0.613316	1.56734	-4.26358
7150.35	1.80439	4.17469	-2.29919	2.83597	2.13919	1.26216	-1.82217
7150.4	1.19404	6.31092	-1.38366	5.27737	-1.52292	0.041458	-0.296295
7150.45	-2.77325	2.34363	1.6681	3.75149	2.44437	4.00874	-3.34805
7150.5	-4.29913	2.95398	2.8888	1.61526	-2.13327	-0.874069	-2.7377
7150.55	-2.77325	5.70057	-0.77331	3.75149	-2.13327	0.041458	-1.21182
7150.6	-0.026666	1.4281	-1.68884	5.27737	0.30814	3.39839	0.924408
7150.65	-0.331842	1.73328	-0.162958	1.61526	-2.43844	-0.263718	-2.12735
7150.7	-3.68878	5.09021	2.8888	1.92044	0.30814	2.48286	-2.12735
7150.75	-3.3836	1.73328	-1.38366	4.36184	-0.607388	2.17769	-1.82217
7150.8	-2.46807	2.64881	-1.68884	1.61526	-1.21774	0.65181	0.314056
7150.85	1.19404	5.39539	-1.07848	0.089385	2.74955	3.70357	-3.04288
7150.9	3.02509	2.34363	2.8888	1.31009	-1.82809	0.956985	-3.9584
7150.95	-0.942193	0.817753	-1.99401	1.31009	0.002964	0.65181	-2.7377
7151	-1.85772	4.78504	-2.90954	-1.43649	1.83402	3.70357	0.619232
7151.05	-1.24737	5.39539	1.05774	-0.520967	-0.607388	1.56734	-1.517
7151.1	0.27851	0.817753	-1.99401	3.14114	4.27543	0.346634	-4.26358
7151.15	1.19404	1.4281	-3.21472	4.05667	0.918491	4.31392	-2.43253
7151.2	0.888861	6.31092	0.752569	1.00491	0.002964	1.56734	0.924408
7151.25	-2.1629	1.73328	-2.60436	2.22561	4.27543	1.56734	0.619232
7151.3	-1.24737	1.73328	-0.77331	5.58255	-0.302212	5.8398	-3.04288
7151.35	-0.942193	5.39539	3.80433	2.83597	0.918491	3.39839	-2.43253
7151.4	1.49921	3.56433	-0.77331	0.39456	2.44437	0.956985	0.619232
7151.45	4.2458	1.73328	2.8888	1.61526	-1.21774	3.39839	0.008881
7151.5	1.19404	3.56433	-0.77331	4.05667	1.83402	1.56734	-3.34805
7151.55	-1.85772	6.31092	1.36292	0.39456	1.52884	-1.17925	-1.82217
7151.6	-1.55255	2.64881	-2.29919	-1.13132	-0.607388	1.26216	1.22958
7151.65	-0.942193	1.12293	-1.38366	1.92044	2.74955	1.26216	-3.9584
7151.7	1.19404	4.47986	-0.468134	5.27737	-0.302212	-1.7896	-3.34805
7151.75	2.41474	2.95398	-3.21472	1.31009	0.002964	-0.263718	0.008881
7151.8	0.27851	0.817753	-1.38366	1.00491	4.5806	1.87251	-5.17911
7151.85	-0.942193	1.73328	-4.13024	2.83597	0.613316	-1.48442	-2.7377
7151.9	-0.942193	4.47986	-0.162958	6.49808	0.30814	-0.874069	-1.82217
7151.95	-0.942193	0.512577	-4.74059	3.14114	4.27543	1.26216	-4.56876
7152	-0.331842	-0.708126	0.142218	2.22561	-0.607388	-2.39995	0.924408
7152.05	2.10956	1.4281	-4.13024	3.14114	-0.302212	-2.39995	-3.9584
7152.1	2.71992	3.25916	0.752569	6.49808	3.05472	1.87251	-0.296295
7152.15	0.888861	-0.708126	-3.21472	4.05667	-1.21774	-0.874069	-3.04288
7152.2	-0.637017	-0.708126	1.05774	2.83597	-0.607388	-0.874069	-0.601471
7152.25	-0.026666	1.73328	-3.21472	3.14114	1.83402	0.956985	-0.906647
7152.3	1.49921	2.34363	1.05774	5.88772	-3.96432	2.78804	-1.82217
7152.35	2.41474	-0.708126	-3.21472	5.27737	-1.52292	-0.263718	-0.296295
7152.4	1.80439	-1.0133	0.752569	2.83597	2.44437	0.346634	-2.12735
7152.45	-2.46807	1.4281	-2.60436	2.22561	-3.35397	4.00874	0.314056
7152.5	-2.1629	1.4281	-0.77331	5.27737	-2.13327	1.26216	-3.04288
7152.55	-0.942193	-1.62365	-0.77331	5.88772	0.918491	0.65181	-0.601471
7152.6	1.19404	-1.62365	-1.38366	2.53079	-3.35397	1.87251	-2.43253
7152.65	-1.55255	1.12293	0.447393	2.53079	-2.74362	2.48286	1.22958
7152.7	-3.07842	0.817753	-2.29919	3.44632	0.918491	-0.263718	-2.12735
7152.75	-0.637017	-2.234	3.80433	6.1929	-3.65915	0.346634	1.83994
7152.8	1.19404	-2.84436	-1.07848	4.66702	-2.13327	4.61909	-1.82217
7152.85	-2.46807	-0.097775	0.752569	1.31009	3.05472	0.956985	3.06064
7152.9	-0.026666	-0.097775	-0.162958	2.53079	-2.74362	0.346634	-1.21182
7152.95	1.49921	-3.45471	-0.468134	4.9722	-2.13327	3.39839	3.36581
7153	-1.55255	-2.84436	3.80433	6.49808	1.83402	5.53462	-2.12735
7153.05	0.888861	-1.92883	-1.38366	3.44632	-1.82809	0.956985	2.75546
7153.1	-0.637017	-1.31848	2.27845	2.22561	-2.74362	1.56734	-2.7377
7153.15	-1.55255	-4.06506	-1.38366	3.44632	-1.52292	4.92427	-0.296295
7153.2	2.41474	-3.45471	-0.77331	5.88772	-0.607388	4.00874	-3.04288
7153.25	-2.77325	-2.84436	2.27845	7.10843	-2.74362	0.346634	-1.517
7153.3	-0.637017	-1.0133	-2.29919	3.14114	-0.912563	1.26216	-1.517
7153.35	-0.026666	-3.45471	2.27845	3.75149	-0.607388	4.31392	-3.65323
7153.4	-1.55255	-4.06506	-1.07848	4.66702	-3.35397	1.87251	0.314056
7153.45	3.02509	-4.98059	-1.68884	8.02395	-1.21774	-0.874069	-3.65323
7153.5	-1.24737	-1.92883	1.05774	4.36184	2.74955	-0.263718	1.22958
7153.55	1.49921	-2.84436	-2.60436	2.22561	-0.607388	3.70357	-3.9584
7153.6	0.27851	-6.81164	0.142218	3.75149	-0.607388	0.65181	-2.7377
7153.65	-0.026666	-6.20129	-0.468134	6.80325	1.83402	-1.7896	-1.21182
7153.7	2.71992	-5.59094	-1.99401	3.14114	0.918491	-2.09477	-4.56876
7153.75	-1.24737	-1.62365	2.27845	2.22561	-1.52292	2.78804	0.314056
7153.8	1.80439	-5.28576	-2.60436	6.49808	-0.607388	-1.48442	-4.26358
7153.85	-0.331842	-6.81164	-0.468134	5.27737	1.52884	-3.0103	-2.7377
7153.9	-0.637017	-6.50647	1.36292	2.53079	-3.04879	-2.09477	-0.906647
7153.95	3.02509	-4.06506	-1.99401	5.58255	-2.74362	0.956985	-2.43253
7154	-1.24737	-2.84436	0.752569	2.53079	0.613316	-1.48442	2.45029
7154.05	0.583686	-6.20129	-1.38366	2.22561	0.002964	-2.09477	-1.82217
7154.1	-0.331842	-6.50647	-2.29919	6.1929	-2.43844	-0.874069	0.619232
7154.15	-2.46807	-6.50647	0.752569	0.39456	-1.52292	2.78804	0.924408
7154.2	1.80439	-4.98059	-5.35095	3.14114	0.002964	2.48286	-1.517
7154.25	-2.1629	-4.06506	-4.43542	0.39456	-2.74362	-0.874069	2.75546
7154.3	-1.85772	-9.25305	-1.07848	1.92044	-1.82809	-0.568893	-1.21182
7154.35	3.02509	-8.33752	-5.9613	1.31009	0.30814	1.56734	-0.601471
7154.4	-1.85772	-8.6427	-3.51989	0.089385	1.22367	3.39839	1.83994
7154.45	-0.331842	-5.59094	-0.77331	4.36184	-2.43844	-0.874069	-2.7377
7154.5	3.63544	-4.67541	-3.21472	0.089385	-0.607388	-1.17925	2.45029
7154.55	-1.24737	-7.72717	0.447393	4.66702	3.3599	0.65181	-0.296295
7154.6	-0.331842	-7.42199	-0.468134	0.39456	-0.302212	3.39839	-0.906647
7154.65	2.71992	-6.81164	-0.77331	6.49808	-1.52292	-0.263718	3.06064
7154.7	-1.24737	-4.37024	2.58362	1.92044	-0.607388	-1.7896	-2.43253
7154.75	-2.46807	-2.84436	-1.99401	5.27737	3.3599	-0.568893	-0.296295
7154.8	2.71992	-3.75988	-2.29919	2.22561	-0.912563	0.956985	-1.21182
7154.85	-1.24737	-5.59094	1.05774	3.75149	-1.21774	2.17769	-3.34805
7154.9	-0.942193	-4.06506	-2.29919	4.36184	0.918491	-1.48442	-0.296295
7154.95	1.80439	-3.45471	-1.99401	3.75149	3.66507	-0.874069	-3.04288
7155	-2.1629	-1.31848	1.05774	5.27737	-0.607388	0.346634	-3.65323
7155.05	-1.24737	-0.40295	-2.60436	2.83597	-1.21774	2.48286	0.619232
7155.1	2.41474	-1.92883	-1.07848	7.4136	0.30814	1.56734	-2.7377
7155.15	-1.24737	-3.14953	3.80433	4.36184	3.3599	-1.17925	-0.296295
7155.2	-1.55255	-1.92883	-1.68884	7.71878	-0.302212	-0.568893	3.36581
7155.25	0.888861	-0.40295	1.05774	2.83597	-0.607388	0.956985	-0.601471
7155.3	1.19404	2.03846	4.1095	4.9722	0.30814	2.48286	1.83994
7155.35	-1.24737	1.12293	-1.38366	3.44632	3.97025	1.26216	3.67099
7155.4	0.888861	-1.62365	-0.468134	1.61526	0.918491	-1.48442	1.53476
7155.45	2.71992	-2.84436	2.27845	5.27737	-0.607388	1.56734	4.58652
7155.5	-1.85772	-1.92883	-1.68884	1.92044	0.30814	2.48286	3.06064
7155.55	-0.331842	-1.31848	-0.162958	5.27737	2.74955	5.53462	1.22958
7155.6	3.33027	-0.708126	3.49915	1.92044	0.002964	4.92427	6.41757
7155.65	-1.24737	-1.92883	-1.38366	1.92044	-2.74362	0.956985	2.75546
7155.7	-1.85772	-1.92883	-0.468134	6.1929	-1.82809	1.87251	1.53476
7155.75	0.888861	-0.708126	3.80433	2.22561	0.613316	2.17769	5.50204
7155.8	-1.24737	2.34363	-1.07848	4.66702	1.22367	4.00874	1.22958
7155.85	-2.77325	-1.0133	-0.162958	2.83597	-1.82809	4.61909	1.22958
7155.9	0.27851	-0.708126	3.49915	1.61526	-1.82809	2.78804	5.19687
7155.95	3.63544	2.03846	-0.468134	5.88772	0.918491	1.26216	-0.296295
7156	-1.55255	0.512577	-0.162958	2.22561	3.97025	1.87251	1.53476
7156.05	-0.942193	-1.31848	2.27845	3.44632	0.918491	2.48286	5.50204
7156.1	3.02509	2.64881	1.05774	4.66702	-0.302212	4.92427	-0.601471
7156.15	1.49921	-1.31848	0.447393	2.83597	-0.607388	3.09322	0.619232
7156.2	-0.331842	-2.53918	1.6681	6.49808	1.83402	-0.874069	5.19687
7156.25	0.888861	2.34363	1.36292	1.92044	3.66507	-0.874069	0.314056
7156.3	2.41474	-1.62365	-1.68884	2.83597	-0.302212	-0.263718	1.53476
7156.35	-0.331842	-0.097775	0.752569	8.02395	-0.912563	1.87251	4.58652
7156.4	-0.026666	-1.62365	3.19398	2.53079	0.002964	2.78804	-0.296295
7156.45	0.888861	-2.53918	-1.99401	3.44632	2.44437	1.56734	0.619232
7156.5	1.80439	2.64881	-1.07848	5.27737	-0.912563	0.041458	3.97617
7156.55	-2.46807	-3.45471	2.27845	1.92044	-3.65915	0.956985	-0.601471
7156.6	-1.85772	0.207401	-0.162958	5.27737	-1.82809	2.17769	-0.601471
7156.65	0.583686	-3.75988	0.142218	3.75149	2.13919	3.39839	1.83994
7156.7	-2.46807	-1.0133	1.05774	2.53079	-2.13327	4.92427	-0.601471
7156.75	-2.77325	-0.097775	2.27845	5.27737	-2.13327	3.70357	-2.43253
7156.8	-1.55255	-1.92883	-1.68884	2.83597	1.83402	0.346634	0.619232
7156.85	2.10956	2.34363	-1.38366	2.83597	1.83402	-1.17925	-0.601471
7156.9	-2.1629	-2.84436	1.6681	7.10843	-1.21774	-0.263718	-3.34805
7156.95	-2.1629	1.4281	-1.99401	3.44632	1.83402	-0.263718	-2.43253
7157	0.27851	-1.62365	-2.29919	3.44632	-0.912563	0.956985	-0.906647
7157.05	3.02509	-2.84436	-0.77331	8.02395	-1.52292	1.26216	-3.04288
7157.1	-0.637017	0.512577	0.142218	2.22561	1.52884	-1.7896	-2.43253
7157.15	-1.55255	-2.53918	-2.90954	3.75149	-2.43844	-1.7896	1.53476
7157.2	-0.331842	2.34363	-1.68884	8.63431	1.52884	-2.70512	-3.65323
7157.25	2.41474	-2.84436	1.36292	3.44632	0.613316	-0.263718	-3.04288
7157.3	-2.1629	-1.31848	-0.162958	4.9722	0.918491	0.041458	2.14511
7157.35	-3.07842	1.12293	-1.68884	7.71878	2.74955	-3.31548	-0.296295
7157.4	-1.85772	-1.92883	0.142218	4.05667	0.918491	-2.70512	-1.82217
7157.45	0.583686	2.34363	2.27845	3.75149	4.27543	0.346634	0.619232
7157.5	-2.46807	-1.92883	-1.07848	6.80325	0.30814	-0.568893	2.45029
7157.55	-3.3836	-1.92883	-2.29919	2.53079	3.97025	-2.70512	-1.517
7157.6	-2.1629	3.86951	-0.77331	3.14114	-2.13327	-1.17925	-0.296295
7157.65	2.71992	-1.62365	0.447393	7.4136	3.3599	-0.263718	3.67099
7157.7	-0.026666	0.207401	-3.21472	3.44632	-2.43844	-4.53618	-0.601471
7157.75	-2.46807	1.73328	-3.51989	4.66702	1.83402	-2.09477	-1.21182
7157.8	-0.026666	-1.92883	-0.162958	7.10843	-2.74362	-2.70512	0.314056
7157.85	3.02509	0.512577	1.05774	2.83597	0.30814	-4.53618	0.924408
7157.9	2.71992	0.817753	-2.90954	3.44632	-1.82809	-0.568893	-2.43253
7157.95	-0.026666	-1.0133	-2.29919	7.4136	0.30814	-4.231	-2.7377
7158	-0.026666	2.34363	0.447393	2.83597	-0.607388	-1.48442	0.314056
7158.05	1.49921	1.4281	1.97327	3.44632	-0.607388	0.041458	-0.906647
7158.1	5.4665	0.512577	-1.99401	7.10843	0.918491	-2.70512	-2.7377
7158.15	1.19404	2.64881	-2.60436	3.75149	0.002964	2.17769	-0.906647
7158.2	-0.026666	2.64881	-1.07848	3.14114	3.05472	-1.17925	3.06064
7158.25	-0.331842	0.817753	0.447393	6.49808	-1.21774	1.26216	-1.517
7158.3	2.10956	2.64881	-3.21472	5.58255	3.05472	0.65181	-2.12735
7158.35	1.80439	2.34363	-2.60436	4.05667	-1.82809	-1.17925	-0.296295
7158.4	-1.55255	-0.097775	-1.07848	5.27737	-0.302212	3.09322	2.45029
7158.45	-0.942193	2.95398	0.752569	6.80325	-2.74362	-2.09477	-2.7377
7158.5	0.27851	1.4281	-1.99401	4.05667	-2.43844	2.17769	-2.43253
7158.55	1.80439	0.207401	-1.38366	5.58255	0.002964	-1.48442	0.008881
7158.6	0.888861	0.512577	-0.77331	8.63431	-3.65915	-0.874069	-0.601471
7158.65	-1.85772	1.4281	2.8888	4.36184	0.613316	2.17769	-4.26358
7158.7	-1.24737	-1.0133	-1.07848	4.9722	-3.04879	-1.7896	-3.9584
7158.75	-0.026666	0.207401	-2.60436	8.63431	-1.52292	0.65181	-0.906647
7158.8	3.02509	3.25916	-1.38366	6.49808	0.002964	-0.874069	-0.601471
7158.85	0.27851	0.207401	1.6681	4.36184	-3.65915	-1.48442	-4.26358
7158.9	-2.1629	0.817753	1.05774	6.80325	-0.302212	2.48286	-3.34805
7158.95	-0.637017	4.17469	-1.99401	8.93948	-3.35397	-3.0103	-0.601471
7159	-0.026666	-1.0133	-3.21472	5.27737	-1.82809	-1.7896	1.22958
7159.05	2.41474	0.512577	-1.38366	5.88772	2.13919	-0.263718	-2.43253
7159.1	0.888861	4.17469	1.36292	9.54983	-1.21774	-3.62065	-1.82217
7159.15	-1.55255	-0.40295	-2.60436	6.80325	0.613316	-1.17925	0.619232
7159.2	-1.85772	-0.40295	-2.29919	4.36184	0.002964	-1.7896	2.75546
7159.25	-0.637017	3.25916	0.752569	5.27737	-0.607388	-3.62065	-0.906647
7159.3	1.49921	3.25916	1.97327	7.71878	3.3599	0.65181	-0.296295
7159.35	1.80439	-0.097775	-1.07848	3.14114	-0.302212	-1.7896	1.83994
7159.4	-1.85772	1.73328	1.05774	2.83597	0.002964	-3.31548	4.28134
7159.45	-2.77325	3.25916	3.80433	5.27737	1.52884	-0.263718	-0.296295
7159.5	-2.1629	-1.0133	-0.77331	4.05667	-2.43844	-2.39995	-2.43253
7159.55	-1.24737	-0.708126	0.142218	1.61526	0.30814	-2.70512	-1.82217
7159.6	0.583686	2.03846	2.27845	2.22561	-0.302212	-0.568893	0.619232
7159.65	-0.637017	-1.92883	-1.38366	5.58255	-1.21774	-2.09477	-1.21182
7159.7	-1.85772	-2.234	3.19398	2.83597	2.74955	-3.0103	-4.26358
7159.75	-0.331842	0.512577	-0.162958	0.699736	-1.52292	0.956985	-2.7377
7159.8	0.27851	0.207401	1.6681	3.14114	-1.82809	-1.7896	1.53476
7159.85	2.10956	-2.53918	2.58362	4.66702	1.83402	-2.70512	-0.601471
7159.9	4.2458	0.207401	0.752569	1.61526	-3.04879	1.26216	-1.82217
7159.95	2.41474	3.25916	5.94056	1.92044	-1.21774	0.041458	0.924408
7160	-0.026666	-0.40295	1.36292	3.75149	0.918491	-1.17925	0.008881
7160.05	-1.24737	-1.31848	4.41468	4.9722	-2.13327	0.346634	-2.43253
7160.1	-0.331842	1.73328	0.447393	0.699736	0.002964	2.48286	0.619232
7160.15	0.583686	2.64881	4.71985	1.61526	0.918491	-0.263718	-3.34805
7160.2	1.80439	-1.62365	-0.162958	3.44632	0.002964	1.87251	-3.34805
7160.25	0.27851	-1.0133	4.71985	5.27737	1.52884	5.22945	0.314056
7160.3	-1.55255	2.03846	0.752569	0.699736	0.613316	-0.263718	-3.9584
7160.35	-2.77325	1.12293	4.1095	0.39456	0.002964	0.956985	-0.906647
7160.4	-2.46807	-0.708126	-0.162958	2.53079	3.3599	5.22945	-5.17911
7160.45	-2.1629	0.512577	3.19398	5.58255	0.613316	1.26216	-3.04288
7160.5	-1.24737	3.56433	-1.99401	1.00491	0.613316	1.87251	-3.04288
7160.55	2.71992	0.512577	1.05774	1.61526	3.66507	3.09322	-5.17911
7160.6	1.19404	-0.40295	-1.38366	2.53079	-0.607388	3.39839	-2.7377
7160.65	-1.85772	-0.097775	-1.38366	5.58255	-0.302212	-1.17925	-4.56876
7160.7	-1.55255	2.03846	-1.99401	1.92044	3.3599	0.041458	-0.601471
7160.75	-1.55255	-1.62365	-3.21472	1.31009	-1.52292	3.70357	-4.87393
7160.8	2.10956	-1.92883	-0.162958	2.53079	-1.82809	-1.7896	0.314056
7160.85	2.10956	-1.0133	-3.21472	5.27737	1.83402	-1.48442	-4.26358
7160.9	-2.1629	1.73328	0.752569	4.05667	-2.43844	1.87251	1.22958
7160.95	-2.46807	-1.0133	-2.90954	1.61526	-2.13327	0.041458	-3.34805
7161	0.27851	-1.62365	1.05774	3.44632	2.44437	-2.09477	0.924408
7161.05	0.27851	0.207401	-1.99401	5.27737	0.30814	-0.568893	-3.65323
7161.1	-2.77325	1.12293	-0.77331	7.10843	-0.302212	2.48286	1.22958
7161.15	-0.331842	-2.84436	-0.77331	3.44632	3.3599	-2.70512	-3.65323
7161.2	2.71992	-2.234	-2.29919	1.92044	0.30814	-1.7896	0.924408
7161.25	-1.55255	-0.097775	3.19398	3.14114	0.30814	1.56734	-4.26358
7161.3	-0.942193	1.4281	-1.07848	5.27737	2.74955	0.65181	0.314056
7161.35	1.19404	-2.234	0.752569	4.66702	2.44437	-2.09477	-3.65323
7161.4	-2.46807	-1.92883	-0.162958	1.61526	-0.912563	-0.874069	-1.82217
7161.45	-0.637017	-1.31848	-0.77331	2.53079	0.918491	2.78804	-4.56876
7161.5	-2.1629	0.817753	4.1095	2.83597	3.05472	-2.39995	-2.12735
7161.55	-3.07842	-1.92883	-1.99401	5.58255	-1.21774	-2.70512	-2.7377
7161.6	2.10956	-3.14953	1.36292	4.05667	-0.912563	-0.568893	-4.26358
7161.65	-2.46807	-3.45471	0.447393	2.22561	2.44437	2.17769	-0.296295
7161.7	1.49921	-0.097775	-0.77331	2.83597	-1.52292	-2.70512	-3.65323
7161.75	-0.026666	-0.40295	4.1095	4.66702	-0.302212	-2.39995	0.924408
7161.8	-1.55255	-1.92883	-0.468134	7.10843	2.44437	0.346634	-3.34805
7161.85	3.33027	-1.62365	3.19398	3.44632	-0.302212	1.56734	-1.21182
7161.9	-0.331842	0.817753	2.58362	2.83597	0.30814	-2.39995	-2.43253
7161.95	0.888861	2.95398	-0.468134	3.75149	2.13919	-1.17925	-3.65323
7162	-0.942193	-0.708126	3.80433	6.49808	0.918491	0.346634	0.619232
7162.05	-0.637017	-1.31848	-2.29919	1.61526	-2.43844	0.65181	-4.26358
7162.1	1.49921	-0.708126	-1.07848	2.83597	0.30814	-2.09477	0.619232
7162.15	-2.77325	1.12293	1.97327	6.80325	3.66507	-1.7896	-2.7377
7162.2	-0.026666	0.817753	-2.90954	2.53079	-0.607388	1.56734	-2.43253
7162.25	-2.1629	-2.234	0.142218	2.22561	0.002964	1.56734	-0.296295
7162.3	-1.24737	-2.84436	-0.468134	6.1929	3.66507	-0.874069	-4.56876
7162.35	2.41474	-2.84436	-0.468134	2.22561	2.74955	-0.568893	0.619232
7162.4	-1.24737	0.512577	2.27845	3.14114	-0.302212	1.26216	-3.04288
7162.45	2.41474	-0.40295	-1.68884	4.05667	1.22367	3.39839	-3.04288
7162.5	1.49921	-3.75988	-0.162958	1.92044	4.27543	-1.48442	0.924408
7162.55	0.27851	-3.75988	2.27845	0.918491	-0.302212	-1.48442	-3.04288
7162.6	3.33027	-1.92883	-3.51989	-3.35397	0.002964	-0.874069	1.22958
7162.65	-0.942193	0.817753	-1.68884	-1.21774	1.52884	2.17769	-0.601471
7162.7	-2.1629	-1.0133	-0.162958	0.613316	2.44437	-1.7896	-2.12735
7162.75	1.80439	-3.45471	-2.90954	-2.13327	-1.82809	-3.92583	1.83994
7162.8	-3.68878	-4.67541	-0.77331	-1.21774	-2.74362	-2.70512	-3.04288
7162.85	-3.3836	-3.75988	-3.21472	1.52884	-0.607388	-1.48442	-0.601471
7162.9	-1.55255	-3.45471	-5.65612	-3.04879	-0.302212	-2.09477	-3.65323
7162.95	2.41474	-5.89611	-4.43542	-1.21774	3.05472	-3.0103	-2.09477
7163	-1.24737	-0.097775	-2.90954	3.3599	-1.21774	0.956985	-3.0103
7163.05	2.41474	1.4281	0.142218	-1.52292	-0.607388	-1.7896	0.956985
7163.1	1.49921	-2.234	-0.468134	-0.302212	1.83402	-2.70512	-1.7896
7163.15	0.27851	-1.92883	-0.468134	2.74955	-3.96432	1.26216	-2.70512
7163.2	3.33027	-1.31848	2.27845	-0.912563	-1.52292	0.041458	1.26216
7163.25	-0.942193	0.817753	-1.68884	0.002964	2.44437	-1.17925	0.041458
7163.3	-2.1629	-1.92883	-0.162958	3.3599	-3.35397	0.346634	-1.17925
7163.35	1.80439	-3.14953	2.27845	0.613316	-2.13327	2.48286	0.346634
7163.4	-3.68878	-3.45471	-3.51989	-0.607388	0.918491	-0.263718	2.48286
7163.45	-3.3836	-0.097775	-1.68884	1.83402	-3.35397	1.87251	-0.263718
7163.5	-1.55255	-0.40295	-0.162958	0.918491	-2.74362	5.22945	1.87251
7163.55	2.41474	-1.92883	-2.90954	-2.43844	0.918491	-0.263718	5.22945
7163.6	-1.24737	-1.62365	-0.77331	0.002964	-3.65915	0.956985	-0.263718
7163.65	2.41474	0.817753	-3.21472	3.3599	-2.13327	5.22945	0.956985
7163.7	1.49921	2.95398	-5.65612	-2.13327	3.05472	1.26216	5.22945
7163.75	0.27851	-0.708126	-4.43542	0.918491	-2.74362	1.87251	1.26216
7163.8	3.33027	-1.31848	-2.90954	-3.35397	-2.13327	3.09322	1.87251
7163.85	-0.942193	-0.708126	0.142218	-1.21774	1.83402	3.39839	3.09322
7163.9	-2.1629	1.12293	-0.468134	0.613316	-1.82809	-1.17925	3.39839
7163.95	1.80439	0.817753	-0.468134	-2.13327	-2.74362	0.041458	-1.17925
7164	-3.68878	-2.234	2.27845	-1.21774	-1.52292	3.70357	0.041458
7164.05	-3.3836	-2.84436	-1.68884	1.52884	-0.607388	-1.7896	3.70357
7164.1	-1.55255	-2.84436	-0.162958	-3.04879	-0.302212	-1.48442	-1.7896
7164.15	2.41474	0.512577	2.27845	-1.21774	3.05472	-2.09477	-1.48442
7164.2	-1.24737	-0.40295	-3.51989	3.3599	-1.21774	-3.0103	-2.09477
7164.25	2.41474	-3.75988	-1.68884	-1.52292	-0.607388	0.956985	-3.0103
7164.3	1.49921	-0.097775	-0.162958	-0.302212	1.83402	-1.7896	0.956985
7164.35	0.27851	1.4281	-2.90954	2.74955	-3.96432	-2.70512	-1.7896
7164.4	3.33027	-2.234	-0.77331	-0.912563	-1.52292	1.26216	-2.70512
7164.45	-0.942193	-1.92883	-3.21472	0.002964	2.44437	0.041458	1.26216
7164.5	-2.1629	-1.31848	-5.65612	3.3599	-3.35397	-1.17925	0.041458
7164.55	1.80439	0.817753	-4.43542	0.613316	-2.13327	0.346634	-1.17925
7164.6	-3.68878	-1.92883	-2.90954	-0.607388	0.918491	2.48286	0.346634
7164.65	-3.3836	-3.14953	0.142218	1.83402	-3.35397	-0.263718	2.48286
7164.7	-1.55255	-3.45471	-0.468134	0.918491	-2.74362	1.87251	-0.263718
7164.75	-9.18194	-0.097775	-0.468134	-2.43844	0.918491	5.22945	1.87251
7164.8	2.41474	-0.40295	2.27845	0.002964	-3.65915	-0.263718	5.22945
7164.85	-1.24737	-1.92883	-1.68884	3.3599	-2.13327	0.956985	-0.263718
7164.9	2.41474	-1.62365	-0.162958	-2.13327	3.05472	5.22945	0.956985
7164.95	1.49921	0.817753	2.27845	-1.68884	-2.74362	1.26216	5.22945
7165	0.27851	2.95398	-3.51989	-0.162958	-2.13327	1.87251	1.26216
7165.05	3.33027	-0.708126	-1.68884	-2.90954	1.83402	3.09322	1.87251
7165.1	-0.942193	-1.31848	-0.162958	-0.77331	-1.82809	3.39839	3.09322
7165.15	-2.1629	-0.708126	-2.90954	-3.21472	-2.74362	-1.17925	3.39839
7165.2	1.80439	1.12293	-0.77331	-5.65612	-1.52292	0.041458	-1.17925
7165.25	-3.68878	0.817753	-3.21472	-4.43542	-0.607388	3.70357	0.041458
7165.3	-3.3836	-2.234	-5.65612	-1.68884	-3.51989	-1.7896	3.70357
7165.35	-1.55255	-2.84436	-4.43542	-0.162958	-1.68884	-1.48442	-1.7896
7165.4	-3.3836	-2.84436	-2.90954	-2.90954	-0.162958	-0.162958	-1.48442
7165.45	-1.55255	0.512577	0.142218	-0.77331	-2.90954	-2.90954	-0.162958
7165.5	-9.18194	-0.40295	-0.468134	-3.21472	-0.77331	-0.77331	-2.90954
7165.55	2.41474	-3.75988	-0.468134	-5.65612	-3.21472	-3.21472	-0.77331
7165.6	-1.24737	-0.097775	2.27845	-4.43542	-5.65612	-5.65612	-3.21472
7165.65	2.41474	1.4281	-1.68884	-1.68884	-4.43542	-4.43542	-5.65612
7165.7	1.49921	-2.234	-0.162958	-0.162958	-2.90954	-0.162958	-4.43542
7165.75	-3.3836	-1.92883	2.27845	-2.90954	0.142218	-2.90954	-0.162958
7165.8	-1.55255	-1.31848	-3.51989	-0.77331	-3.51989	-0.77331	-2.90954
7165.85	-9.18194	0.817753	-1.68884	-3.21472	-1.68884	-3.21472	-0.77331
7165.9	2.41474	-1.92883	-0.162958	-5.65612	-0.162958	-5.65612	-3.21472
7165.95	-1.24737	-3.14953	-2.90954	-4.43542	-2.90954	-4.43542	-5.65612
7166	2.41474	-3.45471	-0.77331	-1.68884	-0.77331	-1.46733	-4.43542
7166.05	1.49921	-0.097775	-3.21472	-0.162958	-3.21472	-3.21472	-3.21472
7166.1	-3.3836	-0.40295	-5.65612	-2.90954	-5.65612	-5.65612	-5.65612
7166.15	-1.55255	-1.92883	-4.43542	-0.77331	-4.43542	-4.43542	-4.43542
7166.2	-3.3836	-1.62365	-2.90954	-3.21472	-2.90954	-2.90954	-2.90954
7166.25	-1.55255	0.817753	0.142218	-5.65612	0.142218	0.142218	0.142218
7166.3	-9.18194	2.95398	-0.468134	-4.43542	-1	-0.468134	-0.468134
7166.35	2.41474	-0.708126	-0.468134	-1.68884	-1	-0.468134	-0.468134
7166.4	-1.24737	-1.31848	2.27845	-0.162958	-0.162958	-3.21472	-3.21472
7166.45	2.41474	-0.708126	-1.68884	-2.90954	-2.90954	-5.65612	-5.65612
7166.5	1.49921	1.12293	-0.162958	-0.77331	-0.77331	-4.43542	-4.43542
7166.55	-3.3836	0.817753	2.27845	-3.21472	-3.21472	-2.90954	-2.90954
7166.6	-1.55255	-2.234	-3.51989	-5.65612	-5.65612	0.142218	0.142218
7166.65	-9.18194	-2.84436	-1.68884	-4.43542	-4.43542	-0.468134	-0.468134
7166.7	2.41474	-2.84436	-0.162958	-1.68884	-2.90954	-0.468134	-0.468134
7166.75	-1.24737	0.512577	-2.90954	-0.162958	0.142218	-1.68884	-1.68884
7166.8	2.41474	-0.40295	-0.77331	-2.90954	-5.65612	-0.162958	-0.162958
7166.85	1.49921	-3.75988	-3.21472	-0.77331	-4.43542	-2.90954	-2.90954
7166.9	-1.79718	-1.01819	-5.65612	-3.21472	-1.68884	-1.89262	-1.28214
7166.95	-1.13507	-1.54407	-4.43542	-5.65612	-1.98288	-1.95805	-1.65274
7167	-1.77814	-1.32336	-1.67467	-4.43542	-4.43796	-1.17876	-2.60098
7167.05	-130.032	-124.609	-123.759	-116.183	-114.438	-107.38	-110.465
7167.1	-133.083	-125.525	-120.402	-113.131	-109.555	-102.498	-105.582
7167.15	-133.388	-124.304	-115.214	-106.417	-105.893	-100.056	-97.9525
7167.2	-130.947	-120.947	-113.994	-105.501	-103.757	-92.732	-95.206
7167.25	-129.116	-120.032	-114.604	-104.281	-94.9067	-91.8165	-93.3749
7167.3	-127.59	-119.727	-111.552	-100.313	-97.3481	-88.7647	-86.661
7167.35	-128.811	-116.37	-107.585	-94.8203	-91.5498	-80.2198	-79.3368
7167.4	-130.642	-114.539	-103.312	-95.4306	-86.667	-79.6094	-75.0644
7167.45	-130.642	-116.98	-104.533	-92.3789	-86.667	-74.4214	-72.0126
7167.5	-128.506	-114.234	-104.838	-86.2754	-80.5634	-67.7076	-66.2143
7167.55	-125.759	-109.046	-100.566	-84.7495	-80.5634	-67.4024	-59.1952
7167.6	-129.421	-113.318	-98.1244	-84.1391	-78.122	-60.0782	-52.4814
7167.65	-130.947	-112.097	-100.871	-78.646	-69.5771	-55.8057	-50.0399
7167.7	-130.947	-107.52	-99.9554	-73.7632	-71.4082	-54.8902	-43.9364
7167.75	-130.642	-110.571	-94.1571	-74.6787	-65.6098	-48.1763	-38.1381
7167.8	-127.59	-110.571	-96.2933	-72.2373	-61.6425	-43.2935	-31.4242
7167.85	-128.201	-109.046	-92.6312	-68.8803	-59.8115	-43.5987	-29.8983
7167.9	-130.947	-107.52	-87.7484	-64.9131	-51.5717	-37.8003	-25.3207
7167.95	-132.778	-110.266	-91.4105	-67.0493	-52.4873	-31.3916	-18.912
7168	-133.083	-109.656	-85.6122	-62.7768	-50.0459	-31.3916	-11.893
7168.05	-130.642	-107.214	-86.2225	-58.8095	-43.0268	-26.5088	-10.3671
7168.1	-128.811	-111.487	-85.6122	-56.9785	-45.4682	-20.4053	-6.70499
7168.15	-129.421	-111.182	-81.3397	-57.5888	-41.8061	-22.2364	0.619232
7168.2	-131.557	-107.825	-82.5604	-53.3164	-36.0078	-16.7432	6.72275
7168.25	-130.947	-109.046	-76.7621	-47.8232	-36.0078	-10.6397	7.63828
7168.3	-130.032	-112.402	-80.119	-47.2129	-31.7353	-11.8604	11.9107
7168.35	-127.895	-110.571	-74.6258	-47.8232	-27.4629	-8.80864	20.4557
7168.4	-124.844	-106.909	-78.5931	-45.687	-28.6836	-2.39995	18.3194
7168.45	-126.064	-111.182	-74.6258	-42.0249	-21.9697	-3.31548	23.5074
7168.5	-130.947	-111.792	-75.2362	-41.4145	-19.2231	-0.874069	29.9161
7168.55	-131.863	-111.182	-74.0155	-43.2456	-18.9179	5.22945	29.0006
7168.6	-131.252	-109.046	-73.4051	-40.8042	-13.4248	8.2812	36.9352
7168.65	-130.032	-112.402	-72.7948	-36.2265	-13.4248	8.58638	37.2403
7168.7	-128.811	-111.792	-71.8793	-35.6162	-12.2041	13.4692	42.4283
7168.75	-127.59	-107.825	-74.0155	-35.6162	-4.87985	18.0468	47.006
7168.8	-130.642	-109.351	-72.7948	-33.48	-6.7109	17.4365	48.2267
7168.85	-132.473	-111.182	-74.0155	-28.292	-4.57467	21.0986	55.5509
7168.9	-132.168	-110.877	-73.1	-26.4609	1.83402	26.5918	54.9405
7168.95	-133.694	-105.078	-75.2362	-28.9023	0.918491	25.6762	63.1803
7169	-131.252	-106.604	-71.8793	-26.7661	2.13919	27.2021	61.6544
7169.05	-130.947	-107.52	-74.3207	-23.7143	8.24271	31.7797	69.2838
7169.1	-133.388	-104.773	-67.912	-19.747	7.63236	34.5263	67.1476
7169.15	-136.44	-100.195	-72.1844	-22.1884	8.85306	33.916	74.4718
7169.2	-135.22	-102.026	-66.6913	-22.7988	13.1255	36.0522	72.6407
7169.25	-132.473	-102.026	-70.3534	-20.3574	11.9048	42.4609	79.6598
7169.3	-132.473	-99.5851	-67.912	-16.6953	13.4307	39.4091	78.4391
7169.35	-135.83	-96.8385	-68.8275	-15.7798	17.7032	40.935	84.2374
7169.4	-135.525	-99.8903	-69.1327	-17.6108	15.8721	45.2075	83.627
7169.45	-130.337	-100.806	-64.8602	-16.0849	15.5669	47.9541	88.815
7169.5	-134.609	-98.6696	-67.6068	-14.5591	18.9239	46.123	89.1202
7169.55	-133.999	-96.8385	-61.1981	-10.2866	20.1446	48.5644	95.5289
7169.6	-130.337	-100.501	-66.3861	-13.6435	18.3135	54.3627	95.8341
7169.65	-134.914	-102.026	-63.3343	-14.5591	21.3653	54.6679	98.2755
7169.7	-134.609	-100.195	-61.8085	-12.4228	23.8067	54.6679	101.022
7169.75	-131.557	-98.9747	-64.2499	-9.67624	20.7549	57.1093	99.8014
7169.8	-136.44	-101.111	-59.6722	-8.76071	24.1119	61.3818	105.295
7169.85	-133.694	-102.026	-64.2499	-10.8969	27.4688	58.9404	103.158
7169.9	-134.304	-101.721	-61.5033	-10.2866	24.1119	60.7714	109.262
7169.95	-136.135	-99.5851	-60.5878	-9.37106	26.2481	63.518	105.295
7170	-131.863	-99.8903	-62.4188	-6.92966	30.2154	65.3491	110.483
7170.05	-137.661	-102.637	-57.8412	-5.40378	27.4688	61.687	108.346
7170.1	-135.22	-103.247	-63.9447	-8.45554	27.1636	62.9077	110.788
7170.15	-136.135	-101.416	-61.5033	-7.84519	31.1309	66.875	113.229
7170.2	-137.966	-98.9747	-59.9774	-5.0986	31.7412	68.0957	112.008
7170.25	-133.694	-102.026	-64.2499	-3.57273	29.2998	65.9594	116.586
7170.3	-137.356	-102.637	-59.3671	-7.54001	31.7412	67.4853	112.924
7170.35	-132.473	-101.111	-63.6395	-6.92966	34.1827	71.1474	115.671
7170.4	-135.83	-98.3644	-62.1136	-4.18308	30.8257	72.6733	115.365
7170.45	-134.914	-98.0592	-59.9774	-7.54001	30.8257	69.9267	115.06
7170.5	-132.473	-100.195	-63.3343	-7.54001	33.8775	72.6733	119.943
7170.55	-134.609	-99.2799	-60.2826	-4.18308	32.9619	75.7251	115.671
7170.6	-130.642	-98.9747	-61.8085	-5.70895	31.4361	77.5561	119.943
7170.65	-134.609	-95.6178	-63.6395	-7.54001	34.1827	74.8095	121.164
7170.7	-135.83	-98.0592	-59.9774	-3.8779	37.5396	75.7251	120.858
7170.75	-130.947	-100.806	-63.3343	-6.62448	33.8775	77.8613	126.046
7170.8	-137.051	-101.416	-62.724	-6.01413	35.0982	81.2182	122.079
7170.85	-135.83	-100.501	-60.2826	-5.0986	37.5396	76.9458	124.826
7170.9	-135.22	-98.6696	-63.9447	-7.84519	37.2344	76.0302	125.741
7170.95	-138.882	-100.501	-61.8085	-4.18308	33.5723	78.4716	122.995
7171	-136.44	-104.163	-62.1136	-8.15036	35.0982	81.2182	128.793
7171.05	-138.882	-103.247	-63.9447	-3.57273	38.7603	79.9975	123.91
7171.1	-141.018	-102.026	-62.1136	-8.15036	35.0982	78.1665	125.741
7171.15	-137.356	-99.2799	-63.9447	-6.01413	33.8775	78.7768	127.267
7171.2	-140.102	-102.026	-65.1654	-6.31931	35.7085	81.5234	124.521
7171.25	-142.239	-104.773	-61.1981	-6.01413	39.0655	82.7441	129.098
7171.3	-139.492	-105.689	-65.7757	-6.92966	36.3189	80.6079	127.267
7171.35	-143.154	-105.994	-65.7757	-8.15036	35.7085	81.5234	126.046
7171.4	-144.985	-103.247	-61.1981	-5.0986	36.9292	82.7441	130.319
7171.45	-143.459	-104.773	-66.0809	-7.84519	38.7603	85.1855	126.046
7171.5	-146.511	-107.825	-66.0809	-4.18308	35.4034	83.6596	127.878
7171.55	-148.952	-107.52	-62.1136	-7.54001	34.1827	81.5234	130.014
7171.6	-147.121	-107.825	-66.9965	-2.96237	37.2344	83.0493	127.572
7171.65	-147.732	-105.994	-65.4706	-8.15036	38.4551	83.9648	130.014
7171.7	-151.699	-103.858	-63.6395	-4.18308	34.4878	87.0166	128.183
7171.75	-149.563	-104.468	-68.2172	-8.45554	34.793	83.9648	127.267
7171.8	-149.258	-107.52	-66.9965	-5.70895	36.3189	83.3544	131.845
7171.85	-152.309	-107.825	-63.9447	-7.54001	38.4551	84.8803	127.878
7171.9	-152.309	-106.909	-68.2172	-8.15036	35.0982	87.0166	128.793
7171.95	-149.868	-105.078	-66.6913	-5.40378	36.0137	89.458	132.15
7172	-154.446	-102.026	-64.2499	-8.45554	36.9292	86.4062	127.572
7172.05	-154.14	-105.078	-68.5223	-4.18308	39.6758	85.7959	128.183
7172.1	-150.478	-107.214	-65.4706	-9.37106	37.2344	85.1855	130.624
7172.15	-153.53	-107.214	-64.2499	-8.15036	36.0137	88.2373	127.572
7172.2	-153.53	-106.604	-67.6068	-7.54001	37.2344	89.7631	130.014
7172.25	-150.478	-103.552	-65.7757	-8.76071	38.4551	87.0166	130.014
7172.3	-152.004	-105.689	-64.555	-4.18308	36.9292	84.5751	127.572
7172.35	-154.14	-108.13	-68.8275	-10.5918	34.4878	83.6596	130.319
7172.4	-152.92	-106.909	-68.5223	-8.15036	34.1827	86.101	130.014
7172.45	-150.173	-104.163	-64.555	-6.92966	37.8448	87.9321	126.657
7172.5	-154.751	-104.468	-68.8275	-9.37106	36.9292	85.4907	129.098
7172.55	-155.056	-106.299	-69.1327	-7.23483	33.2671	83.3544	126.962
7172.6	-152.309	-104.163	-65.4706	-10.5918	33.8775	82.7441	125.436
7172.65	-155.056	-101.111	-69.4379	-9.67624	34.793	83.0493	126.046
7172.7	-158.108	-104.773	-69.4379	-7.54001	38.1499	84.8803	124.521
7172.75	-157.803	-105.078	-65.7757	-12.1176	34.793	86.4062	122.079
7172.8	-155.666	-101.111	-67.6068	-9.67624	33.2671	84.8803	126.962
7172.85	-159.939	-105.383	-69.743	-9.98142	33.5723	82.7441	123.91
7172.9	-160.244	-103.247	-66.9965	-9.98142	35.7085	82.4389	123.3
7172.95	-157.192	-103.552	-67.3016	-5.0986	37.5396	83.6596	127.267
7173	-158.413	-106.604	-71.5741	-9.06589	33.8775	85.1855	126.962
7173.05	-159.634	-101.416	-69.1327	-7.84519	33.5723	89.1528	125.741
7173.1	-157.497	-106.909	-66.3861	-3.57273	33.8775	86.7114	127.572
7173.15	-155.361	-105.994	-70.9637	-8.15036	36.6241	83.0493	127.572
7173.2	-159.328	-107.52	-70.9637	-7.54001	34.793	83.6596	125.436
7173.25	-158.413	-109.961	-67.3016	-6.01413	32.0464	84.8803	127.572
7173.3	-156.277	-107.214	-69.4379	-8.76071	33.5723	85.7959	128.183
7173.35	-153.835	-113.623	-70.6586	-7.23483	36.6241	87.6269	124.826
7173.4	-157.497	-110.266	-69.1327	-8.76071	34.1827	87.3217	127.267
7173.45	-156.582	-113.623	-68.2172	-9.98142	33.2671	85.7959	129.709
7173.5	-153.835	-112.097	-72.1844	-6.01413	37.2344	84.5751	124.826
7173.55	-153.53	-113.013	-71.2689	-8.76071	36.0137	84.8803	126.962
7173.6	-157.497	-114.539	-66.0809	-9.67624	35.0982	87.0166	130.624
7173.65	-155.971	-110.877	-70.6586	-5.70895	38.4551	87.9321	126.657
7173.7	-152.92	-114.539	-71.2689	-10.2866	33.8775	90.0683	126.657
7173.75	-154.446	-111.487	-68.8275	-8.76071	35.4034	87.6269	130.624
7173.8	-158.108	-115.149	-68.2172	-6.01413	36.6241	86.101	127.878
7173.85	-157.497	-114.539	-73.1	-9.67624	33.8775	87.0166	126.657
7173.9	-153.53	-111.792	-72.4896	-7.23483	38.7603	88.5424	128.183
7173.95	-155.361	-114.539	-70.3534	-7.54001	32.0464	90.3735	128.488
7174	-159.023	-112.097	-72.1844	-8.45554	36.0137	86.7114	126.352
7174.05	-159.939	-114.234	-74.931	-6.31931	32.9619	86.7114	126.657
7174.1	-156.582	-114.539	-72.4896	-9.67624	35.0982	87.6269	128.793
7174.15	-157.192	-109.961	-67.912	-9.67624	35.0982	88.2373	124.826
7174.2	-159.939	-116.065	-72.4896	-4.79343	34.1827	83.3544	124.521
7174.25	-158.718	-112.402	-73.7103	-9.67624	37.5396	84.8803	126.657
7174.3	-156.582	-111.182	-72.4896	-8.45554	33.2671	87.9321	126.352
7174.35	-153.835	-114.234	-70.9637	-5.0986	36.9292	84.5751	123.91
7174.4	-157.497	-111.182	-75.8465	-9.37106	33.5723	86.4062	124.826
7174.45	-157.803	-113.928	-75.8465	-8.15036	37.5396	89.458	128.793
7174.5	-156.277	-114.234	-74.931	-6.92966	31.4361	86.101	123.605
7174.55	-155.056	-111.487	-74.3207	-9.67624	36.9292	89.458	123.3
7174.6	-158.108	-115.759	-76.7621	-7.84519	32.9619	87.9321	126.962
7174.65	-160.854	-116.675	-75.8465	-6.92966	37.5396	87.0166	126.962
7174.7	-159.939	-112.708	-73.4051	-8.76071	33.2671	91.289	124.521
7174.75	-156.582	-116.675	-71.8793	-5.40378	36.6241	85.7959	126.046
7174.8	-159.023	-116.065	-74.931	-6.92966	34.1827	88.2373	130.319
7174.85	-162.991	-112.402	-74.3207	-8.15036	36.9292	84.5751	130.014
7174.9	-161.465	-116.37	-72.1844	-6.92966	37.5396	85.1855	128.488
7174.95	-159.939	-115.759	-70.6586	-7.23483	36.3189	89.1528	129.709
7175	-156.887	-111.792	-74.3207	-8.76071	40.5913	85.4907	133.371
7175.05	-160.549	-116.37	-74.6258	-6.62448	35.0982	90.9838	128.183
7175.1	-160.549	-116.98	-74.0155	-7.84519	40.5913	86.101	128.488
7175.15	-160.854	-113.318	-71.8793	-9.67624	35.0982	89.458	130.929
7175.2	-157.192	-117.285	-74.931	-6.62448	37.5396	90.6787	132.15
7175.25	-155.971	-118.201	-75.2362	-6.31931	38.1499	89.1528	128.793
7175.3	-159.634	-115.759	-74.6258	-9.67624	34.4878	94.3408	129.098
7175.35	-159.634	-118.506	-71.2689	-7.84519	39.0655	87.3217	132.15
7175.4	-159.939	-119.116	-72.4896	-5.70895	32.9619	89.7631	131.845
7175.45	-157.192	-116.675	-74.931	-8.45554	36.0137	90.3735	128.793
7175.5	-156.582	-118.811	-74.6258	-7.84519	34.793	87.0166	129.403
7175.55	-159.939	-120.337	-72.1844	-4.18308	32.6568	90.3735	130.929
7175.6	-160.244	-117.285	-70.6586	-9.37106	36.0137	86.4062	131.845
7175.65	-159.023	-116.37	-74.0155	-8.76071	32.3516	87.6269	128.183
7175.7	-155.971	-119.727	-74.931	-3.8779	33.5723	90.3735	130.014
7175.75	-153.53	-117.59	-74.931	-9.37106	36.0137	84.8803	131.234
7175.8	-155.056	-114.844	-72.1844	-9.06589	32.9619	88.2373	133.371
7175.85	-155.666	-119.116	-76.1517	-6.62448	36.0137	90.0683	129.403
7175.9	-154.14	-118.506	-77.0673	-6.01413	33.8775	84.5751	129.709
7175.95	-152.004	-114.539	-75.5414	-9.06589	33.2671	86.7114	131.845
7176	-148.952	-117.59	-74.0155	-8.76071	36.6241	88.8476	134.286
7176.05	-149.868	-118.201	-77.9828	-3.8779	31.4361	85.4907	130.929
7176.1	-151.699	-115.149	-76.7621	-8.76071	34.1827	87.6269	128.793
7176.15	-152.615	-116.675	-74.3207	-8.45554	34.1827	88.8476	128.793
7176.2	-152.309	-117.59	-78.5931	-7.23483	32.0464	85.7959	132.455
7176.25	-151.089	-116.065	-74.0155	-7.54001	36.0137	89.7631	131.54
7176.3	-149.563	-113.928	-74.931	-9.67624	33.8775	91.289	129.403
7176.35	-153.53	-117.896	-75.5414	-7.84519	32.6568	88.2373	130.929
7176.4	-155.056	-117.59	-71.8793	-4.79343	37.5396	89.7631	133.676
7176.45	-155.056	-112.402	-75.5414	-9.67624	33.2671	92.2045	132.76
7176.5	-154.446	-114.844	-71.5741	-9.37106	35.7085	87.6269	130.319
7176.55	-154.751	-116.065	-75.2362	-6.62448	38.1499	87.9321	133.981
7176.6	-153.835	-113.928	-73.7103	-7.84519	33.2671	91.289	136.422
7176.65	-155.971	-112.097	-73.7103	-10.2866	36.6241	87.6269	132.455
7176.7	-157.497	-116.065	-75.5414	-9.67624	35.7085	88.2373	133.981
7176.75	-157.192	-116.065	-72.7948	-6.92966	34.4878	92.2045	137.033
7176.8	-156.887	-111.792	-76.4569	-9.98142	37.5396	87.9321	133.371
7176.85	-155.666	-113.623	-72.1844	-11.2021	34.4878	89.458	135.812
7176.9	-153.225	-115.759	-76.4569	-9.37106	33.8775	93.7304	135.812
7176.95	-155.361	-115.149	-70.9637	-6.31931	36.9292	90.6787	133.066
7177	-157.803	-112.402	-77.3724	-8.45554	34.793	89.1528	137.948
7177.05	-157.497	-116.37	-72.4896	-9.67624	32.9619	91.289	132.76
7177.1	-157.192	-117.896	-76.7621	-7.23483	36.6241	90.6787	136.117
7177.15	-154.446	-115.759	-71.8793	-6.31931	32.9619	86.7114	133.371
7177.2	-154.14	-114.234	-77.3724	-10.2866	32.3516	88.5424	136.117
7177.25	-152.615	-117.896	-73.4051	-9.67624	35.7085	90.9838	135.202
7177.3	-155.056	-116.065	-76.1517	-9.06589	31.1309	87.3217	135.202
7177.35	-156.582	-114.234	-72.4896	-6.92966	31.7412	87.3217	135.202
7177.4	-155.666	-112.402	-75.5414	-10.5918	36.6241	89.458	134.591
7177.45	-154.751	-116.98	-72.4896	-9.67624	32.3516	88.5424	136.117
7177.5	-151.394	-116.065	-74.0155	-9.37106	32.3516	86.4062	133.676
7177.55	-153.53	-113.318	-74.0155	-6.31931	36.6241	88.5424	136.117
7177.6	-154.14	-112.708	-70.3534	-9.67624	32.6568	90.0683	133.981
7177.65	-152.615	-115.454	-73.7103	-10.2866	33.8775	86.4062	137.338
7177.7	-150.173	-114.844	-69.743	-9.37106	37.8448	88.5424	133.981
7177.75	-153.53	-112.402	-74.6258	-6.62448	32.9619	91.289	137.643
7177.8	-152.92	-113.318	-71.8793	-10.2866	33.8775	89.7631	133.371
7177.85	-149.258	-116.98	-74.6258	-11.2021	37.8448	88.2373	137.338
7177.9	-152.92	-116.675	-74.931	-9.67624	34.4878	90.0683	132.76
7177.95	-152.309	-115.454	-71.8793	-5.40378	34.1827	92.5097	136.117
7178	-147.121	-114.539	-75.5414	-7.54001	36.0137	88.8476	133.371
7178.05	-151.699	-118.506	-72.1844	-8.76071	34.4878	87.9321	138.864
7178.1	-150.173	-117.285	-75.5414	-6.62448	32.0464	90.6787	134.591
7178.15	-146.511	-114.539	-74.0155	-4.48825	33.5723	90.3735	138.559
7178.2	-151.089	-111.792	-71.8793	-3.26755	35.7085	87.6269	134.897
7178.25	-148.037	-114.234	-75.5414	-6.31931	31.1309	87.3217	137.338
7178.3	-151.394	-115.149	-71.2689	-5.70895	32.9619	91.289	135.812
7178.35	-151.394	-112.402	-75.2362	-5.0986	35.4034	89.7631	133.371
7178.4	-148.037	-108.435	-74.0155	-3.8779	31.1309	88.5424	135.812
7178.45	-152.615	-110.877	-71.2689	-7.54001	32.3516	89.458	132.76
7178.5	-148.952	-113.318	-75.8465	-9.67624	36.3189	92.5097	137.033
7178.55	-152.004	-112.402	-72.7948	-8.76071	32.9619	90.0683	131.845
7178.6	-151.089	-110.877	-74.6258	-5.40378	33.2671	87.3217	133.066
7178.65	-148.342	-110.877	-75.5414	-9.67624	36.3189	89.1528	133.066
7178.7	-152.004	-113.928	-71.2689	-10.5918	37.5396	90.9838	131.54
7178.75	-148.952	-112.708	-74.931	-8.45554	33.8775	87.9321	136.728
7178.8	-153.835	-112.402	-71.8793	-10.5918	35.4034	87.3217	131.54
7178.85	-152.92	-109.656	-70.9637	-10.8969	39.3706	87.9321	134.591
7178.9	-152.615	-111.487	-73.4051	-7.23483	34.1827	91.8994	132.455
7178.95	-153.835	-113.928	-70.0482	-10.8969	33.5723	88.2373	130.929
7179	-150.173	-113.318	-73.4051	-9.67624	35.4034	87.0166	135.507
7179.05	-153.53	-112.402	-72.7948	-6.31931	34.793	88.5424	130.319
7179.1	-154.14	-109.656	-69.1327	-8.15036	31.7412	90.9838	133.981
7179.15	-149.563	-110.877	-74.0155	-4.18308	33.2671	88.2373	133.066
7179.2	-153.225	-113.013	-71.5741	-8.15036	35.7085	86.4062	131.845
7179.25	-151.089	-112.097	-68.8275	-5.70895	32.0464	87.3217	136.422
7179.3	-150.478	-111.792	-70.9637	-7.54001	31.4361	89.458	133.066
7179.35	-153.53	-109.046	-68.8275	-7.23483	33.8775	89.7631	135.202
7179.4	-149.868	-109.046	-68.2172	-7.23483	34.793	87.3217	136.117
7179.45	-149.868	-112.097	-71.2689	-8.76071	31.7412	87.3217	134.286
7179.5	-152.004	-111.487	-68.2172	-6.62448	32.6568	88.2373	137.033
7179.55	-148.647	-109.961	-71.2689	-9.67624	36.9292	90.0683	134.897
7179.6	-149.868	-107.214	-72.4896	-7.84519	35.0982	87.3217	135.202
7179.65	-150.478	-107.214	-67.3016	-9.98142	32.6568	86.4062	137.338
7179.7	-146.816	-110.571	-71.8793	-7.23483	33.8775	87.6269	131.845
7179.75	-148.952	-111.182	-71.2689	-11.2021	38.4551	90.3735	134.286
7179.8	-150.173	-109.656	-67.6068	-7.23483	34.793	88.2373	133.676
7179.85	-147.732	-107.52	-71.5741	-10.8969	34.4878	86.4062	131.234
7179.9	-148.952	-105.383	-70.0482	-6.01413	36.9292	88.2373	135.507
7179.95	-152.309	-107.214	-67.3016	-9.67624	38.7603	89.7631	130.624
7180	-149.258	-109.961	-71.5741	-5.40378	34.4878	91.8994	130.929
7180.05	-148.037	-108.13	-71.5741	-9.67624	33.5723	89.1528	134.591
7180.1	-150.784	-106.909	-69.4379	-6.31931	34.793	87.6269	130.929
7180.15	-148.342	-105.383	-74.0155	-8.45554	37.2344	88.2373	133.371
7180.2	-146.511	-104.468	-73.4051	-7.54001	32.6568	89.7631	134.897
7180.25	-149.868	-107.214	-70.6586	-7.23483	32.3516	92.5097	132.15
7180.3	-147.732	-107.825	-75.2362	-8.76071	32.9619	88.8476	134.591
7180.35	-144.68	-108.74	-73.1	-5.70895	36.9292	87.3217	133.676
7180.4	-149.258	-107.52	-71.8793	-9.67624	33.5723	87.6269	132.76
7180.45	-149.258	-106.299	-75.5414	-5.40378	32.9619	90.6787	135.507
7180.5	-145.596	-106.299	-74.0155	-9.37106	34.1827	91.8994	132.15
7180.55	-149.258	-109.046	-72.1844	-7.23483	37.2344	89.458	131.54
7180.6	-150.478	-109.351	-77.3724	-7.54001	34.1827	87.6269	137.643
7180.65	-147.732	-107.825	-77.3724	-8.45554	30.8257	88.8476	131.845
7180.7	-147.121	-105.383	-73.4051	-4.18308	31.4361	90.0683	132.76
7180.75	-149.258	-106.604	-77.6776	-7.84519	33.5723	92.2045	136.422
7180.8	-149.868	-109.046	-77.0673	-4.79343	32.6568	88.2373	130.929
7180.85	-145.596	-105.689	-72.7948	-6.92966	28.0791	86.4062	133.066
7180.9	-150.173	-102.332	-77.3724	-8.45554	29.2998	86.7114	136.117
7180.95	-149.868	-107.214	-77.6776	-4.18308	31.1309	87.3217	131.845
7181	-147.732	-107.214	-72.7948	-9.67624	34.1827	87.9321	135.202
7181.05	-148.952	-102.942	-75.5414	-7.23483	31.1309	88.2373	136.728
7181.1	-150.173	-108.435	-76.1517	-8.15036	30.5205	85.7959	132.76
7181.15	-149.258	-108.435	-73.7103	-9.06589	31.1309	84.8803	134.897
7181.2	-147.427	-105.078	-73.7103	-5.70895	34.1827	85.1855	139.169
7181.25	-152.309	-109.961	-77.0673	-9.98142	35.0982	86.4062	135.507
7181.3	-154.14	-107.825	-74.931	-8.76071	31.7412	89.7631	136.117
7181.35	-152.92	-108.13	-73.1	-6.62448	31.7412	87.9321	138.254
7181.4	-154.14	-110.266	-76.7621	-9.37106	32.3516	85.7959	134.591
7181.45	-150.634	-105.078	-76.4569	-6.31931	35.4034	86.101	135.202
7181.5	-150.939	-108.435	-72.7948	-9.37106	31.7412	87.3217	138.559
7181.55	-150.497	-105.078	-75.5414	-9.37106	29.9102	89.458	135.202
7181.6	-153.296	-107.214	-74.931	-5.70895	31.7412	92.2045	135.507
7181.65	-150.042	-106.909	-71.8793	-9.67624	34.793	90.3735	140.085
7181.7	-150.127	-103.552	-72.1844	-6.62448	30.5205	87.6269	135.812
7181.75	-150.516	-106.299	-75.5414	-7.23483	29.2998	88.2373	133.981
7181.8	-149.399	-102.026	-73.7103	-8.45554	32.0464	89.1528	137.338
7181.85	-142.925	-106.604	-70.0482	-4.18308	31.7412	89.1528	133.981
7181.9	-150.789	-102.637	-74.0155	-7.54001	29.2998	92.2045	133.371
7181.95	-150.958	-104.773	-74.6258	-6.92966	33.2671	92.8149	134.591
7182	-150.01	-106.299	-71.5741	-3.8779	30.8257	90.3735	134.591
7182.05	-150.094	-104.468	-70.6586	-8.15036	31.4361	88.2373	132.15
7182.1	-150.127	-108.435	-74.6258	-8.45554	35.0982	87.9321	133.981
7182.15	-152.38	-103.552	-72.4896	-4.18308	30.5205	89.7631	136.728
7182.2	-153.296	-108.435	-69.1327	-8.45554	32.9619	91.8994	132.15
7182.25	-150.549	-107.52	-71.8793	-6.92966	32.0464	89.458	133.066
7182.3	-156.582	-106.909	-73.7103	-6.01413	31.4361	86.7114	137.033
7182.35	-153.53	-108.74	-72.1844	-9.67624	32.9619	87.6269	132.455
7182.4	-155.666	-105.078	-69.1327	-6.31931	30.8257	90.0683	132.455
7182.45	-153.835	-109.656	-74.0155	-6.01413	34.4878	87.9321	133.981
7182.5	-151.394	-108.435	-74.0155	-8.15036	29.9102	86.7114	133.676
7182.55	-149.868	-105.689	-73.1	-5.0986	34.4878	88.2373	131.845
7182.6	-152.309	-109.351	-72.1844	-6.62448	28.6895	90.6787	133.371
7182.65	-151.089	-108.435	-74.931	-8.76071	33.5723	87.3217	136.117
7182.7	-148.952	-108.74	-73.7103	-5.40378	28.9947	90.0683	131.54
7182.75	-145.596	-111.182	-71.2689	-8.45554	32.3516	91.289	131.234
7182.8	-147.732	-107.825	-70.6586	-9.67624	30.2154	89.458	132.455
7182.85	-148.952	-110.266	-73.7103	-6.31931	32.0464	91.5942	131.845
7182.9	-148.037	-111.182	-73.4051	-9.37106	31.7412	88.2373	129.709
7182.95	-144.375	-107.825	-71.2689	-9.67624	32.9619	87.9321	130.014
7183	-144.68	-110.266	-70.0482	-6.92966	33.8775	93.1201	132.76
7183.05	-146.511	-111.182	-73.1	-9.06589	31.4361	86.101	128.793
7183.1	-145.29	-106.909	-73.1	-9.06589	34.4878	88.2373	128.793
7183.15	-142.544	-109.961	-70.9637	-6.62448	32.0464	86.4062	130.929
7183.2	-141.323	-109.656	-70.0482	-9.06589	36.3189	86.101	131.54
7183.25	-144.68	-104.773	-73.1	-9.37106	31.1309	89.7631	127.878
7183.3	-144.68	-109.656	-71.8793	-6.92966	34.4878	86.101	128.488
7183.35	-142.849	-108.13	-69.1327	-8.15036	31.7412	89.7631	131.234
7183.4	-139.797	-103.552	-67.6068	-9.67624	32.3516	86.101	130.929
7183.45	-141.628	-106.604	-70.6586	-6.01413	32.6568	87.3217	127.267
7183.5	-146.511	-107.825	-69.743	-6.01413	31.4361	90.9838	128.793
7183.55	-144.985	-103.858	-68.5223	-9.06589	35.4034	87.6269	132.76
7183.6	-142.849	-106.604	-64.8602	-7.23483	30.5205	93.7304	130.319
7183.65	-140.102	-105.994	-70.3534	-6.01413	32.6568	88.8476	128.183
7183.7	-141.018	-102.026	-70.6586	-9.06589	32.3516	90.6787	129.403
7183.75	-143.459	-103.858	-69.4379	-6.92966	31.7412	90.6787	133.066
7183.8	-143.154	-105.078	-67.3016	-3.8779	35.7085	87.6269	130.014
7183.85	-141.018	-101.721	-67.6068	-8.15036	31.4361	91.5942	128.793
7183.9	-137.661	-102.637	-71.2689	-7.84519	33.2671	87.0166	128.793
7183.95	-139.797	-105.383	-70.9637	-5.40378	32.3516	86.4062	133.066
7184	-141.628	-103.552	-70.9637	-8.45554	31.7412	90.3735	130.929
7184.05	-141.628	-102.637	-68.2172	-8.76071	35.7085	86.4062	128.488
7184.1	-139.492	-106.604	-72.1844	-6.92966	30.8257	87.0166	130.929
7184.15	-136.44	-105.383	-72.7948	-7.23483	31.4361	91.289	132.455
7184.2	-138.882	-102.942	-71.2689	-9.67624	32.6568	86.101	132.76
7184.25	-140.713	-106.299	-69.743	-9.06589	29.605	87.3217	131.845
7184.3	-140.408	-106.604	-73.1	-3.57273	33.2671	90.6787	132.15
7184.35	-139.797	-102.026	-73.1	-8.45554	31.4361	86.7114	133.981
7184.4	-138.882	-105.383	-68.8275	-9.06589	30.5205	89.1528	135.202
7184.45	-138.576	-105.689	-73.7103	-6.01413	34.1827	90.9838	130.014
7184.5	-140.713	-103.858	-73.1	-6.62448	28.6895	87.3217	128.793
7184.55	-142.239	-103.858	-68.5223	-8.45554	30.8257	90.3735	129.403
7184.6	-141.323	-106.909	-72.7948	-7.23483	33.5723	91.8994	131.845
7184.65	-139.492	-106.909	-70.3534	-3.57273	29.9102	88.5424	127.572
7184.7	-136.135	-103.552	-69.743	-8.76071	32.0464	89.458	126.046
7184.75	-136.44	-107.825	-71.2689	-8.45554	31.1309	93.4252	127.878
7184.8	-138.882	-109.351	-66.9965	-4.79343	30.5205	88.2373	130.624
7184.85	-137.966	-106.604	-72.4896	-6.31931	33.2671	88.5424	127.267
7184.9	-136.745	-107.825	-67.912	-9.67624	30.2154	92.2045	127.572
7184.95	-134.609	-110.877	-70.9637	-9.06589	29.605	87.9321	132.455
7185	-131.863	-109.961	-69.4379	-5.70895	33.8775	87.3217	129.098
7185.05	-133.388	-105.383	-71.2689	-9.67624	29.605	90.9838	129.709
7185.1	-136.745	-110.571	-71.8793	-9.98142	28.9947	87.3217	135.812
7185.15	-137.051	-110.571	-70.3534	-8.45554	32.6568	86.101	130.624
7185.2	-136.745	-108.13	-71.5741	-6.31931	28.6895	88.5424	132.15
7185.25	-137.356	-107.214	-70.3534	-9.37106	29.9102	88.2373	134.591
7185.3	-135.525	-109.656	-71.5741	-9.67624	32.3516	85.7959	131.234
7185.35	-134.609	-109.046	-69.1327	-7.23483	27.774	87.6269	133.371
7185.4	-137.051	-105.689	-71.2689	-5.0986	31.1309	90.3735	129.098
7185.45	-138.271	-108.74	-67.912	-9.06589	33.5723	85.4907	130.929
7185.5	-137.051	-111.182	-71.8793	-8.45554	30.2154	87.3217	130.319
7185.55	-135.83	-109.961	-68.2172	-7.54001	31.7412	90.3735	129.709
7185.6	-132.778	-106.299	-72.4896	-5.40378	33.5723	88.8476	131.234
7185.65	-131.863	-111.182	-67.3016	-8.15036	30.5205	87.3217	130.624
7185.7	-132.778	-111.487	-73.7103	-7.84519	33.5723	89.7631	133.371
7185.75	-133.999	-109.961	-69.1327	-6.62448	34.4878	90.6787	130.319
7185.8	-133.388	-106.909	-73.4051	-5.70895	31.4361	86.4062	133.981
7185.85	-130.947	-110.877	-70.0482	-9.37106	32.9619	86.7114	129.403
7185.9	-129.726	-110.266	-73.1	-9.67624	35.4034	88.8476	133.676
7185.95	-133.999	-107.214	-71.5741	-7.84519	30.5205	86.4062	129.709
7186	-133.694	-106.604	-70.0482	-3.8779	32.3516	85.7959	134.286
7186.05	-131.252	-110.266	-71.2689	-8.15036	33.8775	86.7114	128.793
7186.1	-132.168	-110.571	-66.9965	-9.37106	29.2998	88.2373	133.066
7186.15	-134.609	-107.825	-70.6586	-8.15036	29.2998	84.27	129.098
7186.2	-132.473	-105.689	-68.5223	-3.8779	32.9619	86.4062	132.455
7186.25	-129.726	-109.961	-70.3534	-6.31931	29.2998	89.7631	127.572
7186.3	-133.999	-110.266	-70.0482	-9.37106	31.1309	88.2373	132.15
7186.35	-130.642	-109.046	-68.5223	-8.45554	35.0982	85.7959	127.267
7186.4	-129.116	-105.994	-71.8793	-7.84519	30.5205	87.9321	130.014
7186.45	-131.863	-108.435	-67.912	-6.92966	30.5205	91.5942	126.962
7186.5	-127.895	-108.74	-70.9637	-9.67624	34.4878	86.7114	128.793
7186.55	-132.473	-107.214	-70.3534	-9.06589	32.6568	87.9321	129.403
7186.6	-131.252	-103.858	-69.743	-6.92966	31.1309	89.1528	126.962
7186.65	-129.116	-105.689	-70.9637	-3.8779	32.9619	90.9838	131.54
7186.7	-132.778	-108.435	-67.6068	-5.70895	33.8775	84.5751	128.793
7186.75	-128.811	-106.604	-72.4896	-7.23483	32.0464	84.8803	134.591
7186.8	-132.473	-104.773	-71.2689	-6.31931	32.6568	87.9321	130.624
7186.85	-130.947	-103.858	-68.2172	-2.96237	35.4034	88.5424	134.286
7186.9	-129.726	-107.825	-71.2689	-6.31931	30.5205	85.1855	135.507
7186.95	-131.863	-108.13	-67.6068	-9.06589	30.5205	85.1855	133.676
7187	-128.506	-106.299	-70.9637	-8.15036	33.5723	88.8476	138.254
7187.05	-133.388	-104.163	-69.743	-5.70895	30.2154	89.1528	132.455
7187.1	-130.642	-107.214	-65.7757	-9.98142	29.9102	84.8803	137.033
7187.15	-131.557	-109.351	-69.1327	-9.37106	32.0464	85.4907	135.507
7187.2	-132.473	-109.046	-66.6913	-6.92966	32.3516	88.8476	133.981
7187.25	-126.369	-106.604	-67.912	-11.8125	28.3843	90.0683	137.033
7187.3	-131.252	-103.552	-69.743	-9.06589	28.9947	87.9321	132.15
7187.35	-128.811	-106.299	-63.9447	-10.2866	34.4878	88.5424	134.897
7187.4	-126.98	-106.909	-69.4379	-11.8125	31.7412	90.6787	133.066
7187.45	-128.506	-104.163	-68.8275	-8.15036	29.605	92.2045	132.15
7187.5	-124.844	-101.721	-66.0809	-11.8125	31.7412	87.6269	136.422
7187.55	-127.895	-100.195	-69.743	-8.76071	32.9619	86.4062	132.15
7187.6	-128.811	-102.637	-68.8275	-12.1176	28.9947	87.9321	135.507
7187.65	-123.623	-103.552	-67.6068	-10.2866	28.9947	90.6787	135.812
7187.7	-128.811	-102.942	-69.1327	-9.67624	33.5723	87.9321	133.981
7187.75	-128.201	-102.332	-66.0809	-9.67624	31.4361	84.5751	138.254
7187.8	-123.318	-102.332	-68.8275	-8.76071	28.9947	85.4907	133.676
7187.85	-128.506	-104.773	-70.6586	-9.67624	29.2998	88.8476	134.591
7187.9	-127.59	-105.994	-65.1654	-6.92966	34.1827	89.458	136.422
7187.95	-124.233	-105.078	-69.1327	-9.37106	31.7412	85.1855	133.066
7188	-129.726	-102.026	-69.1327	-5.0986	31.1309	85.4907	136.422
7188.05	-128.811	-99.8903	-65.1654	-9.06589	31.7412	87.9321	135.507
7188.1	-124.844	-101.111	-69.743	-5.0986	34.4878	91.289	133.371
7188.15	-129.421	-102.637	-66.9965	-8.76071	32.0464	88.2373	137.643
7188.2	-129.116	-101.721	-64.2499	-4.18308	32.3516	87.0166	133.066
7188.25	-124.538	-101.721	-68.5223	-9.67624	34.4878	87.9321	133.371
7188.3	-127.895	-99.2799	-67.6068	-5.40378	36.0137	90.9838	135.507
7188.35	-127.895	-100.195	-65.7757	-9.67624	31.1309	92.5097	130.319
7188.4	-123.318	-104.468	-69.1327	-5.70895	30.8257	88.8476	133.066
7188.45	-127.59	-105.078	-67.912	-10.5918	31.4361	87.9321	132.15
7188.5	-127.285	-105.689	-66.6913	-8.15036	33.2671	88.8476	129.709
7188.55	-124.233	-103.858	-70.0482	-9.67624	29.2998	89.7631	133.066
7188.6	-126.064	-101.721	-67.912	-9.06589	28.9947	90.9838	130.929
7188.65	-127.285	-102.332	-67.3016	-7.54001	30.8257	86.7114	130.624
7188.7	-124.844	-103.858	-70.6586	-9.37106	32.9619	86.7114	136.117
7188.75	-123.318	-103.552	-67.6068	-3.8779	31.7412	87.9321	131.54
7188.8	-126.675	-103.858	-66.0809	-8.45554	31.7412	90.3735	132.455
7188.85	-126.064	-102.026	-69.743	-3.57273	34.4878	91.289	137.033
7188.9	-122.097	-98.9747	-67.3016	-7.54001	37.5396	86.7114	131.234
7188.95	-126.369	-102.637	-64.555	-6.31931	35.4034	85.4907	131.845
7189	-125.759	-103.552	-67.6068	-4.48825	33.2671	86.4062	135.202
7189.05	-123.623	-102.332	-64.2499	-7.84519	34.1827	87.9321	131.845
7189.1	-124.538	-98.3644	-62.4188	-3.8779	35.7085	89.458	131.845
7189.15	-126.064	-99.2799	-66.3861	-9.06589	34.4878	88.5424	134.286
7189.2	-124.233	-100.501	-64.555	-6.62448	30.5205	86.4062	130.014
7189.25	-122.097	-98.3644	-62.1136	-6.01413	31.7412	86.101	132.15
7189.3	-126.675	-97.1437	-68.5223	-9.67624	33.5723	86.7114	134.286
7189.35	-123.928	-101.721	-67.6068	-5.40378	35.0982	89.1528	130.319
7189.4	-120.571	-100.195	-64.2499	-9.37106	31.7412	90.6787	132.15
7189.45	-123.318	-100.806	-68.5223	-8.15036	29.9102	87.3217	134.591
7189.5	-125.149	-104.163	-70.6586	-7.54001	29.605	85.7959	130.624
7189.55	-123.928	-101.111	-66.9965	-9.67624	31.4361	87.3217	134.897
7189.6	-122.707	-103.247	-68.2172	-5.40378	31.7412	87.9321	135.507
7189.65	-126.369	-105.078	-69.743	-9.37106	29.2998	89.1528	133.371
7189.7	-127.285	-100.501	-66.9965	-9.67624	28.9947	89.458	134.897
7189.75	-124.844	-104.163	-66.9965	-6.92966	30.8257	86.4062	138.559
7189.8	-127.59	-102.332	-69.743	-9.98142	33.2671	84.8803	132.76
7189.85	-130.032	-103.247	-67.912	-7.54001	32.6568	86.7114	134.286
7189.9	-129.421	-104.163	-64.2499	-7.84519	30.2154	85.7959	137.338
7189.95	-126.064	-98.9747	-68.5223	-9.06589	31.1309	88.5424	131.54
7190	-128.201	-102.026	-68.2172	-5.40378	32.9619	89.7631	130.929
7190.05	-127.895	-96.2281	-64.8602	-8.45554	29.605	87.6269	133.371
7190.1	-126.369	-101.416	-65.1654	-8.15036	29.605	84.5751	130.014
7190.15	-123.928	-98.9747	-66.9965	-6.31931	31.4361	85.7959	128.793
7190.2	-126.98	-100.501	-64.8602	-9.67624	31.4361	87.0166	133.371
7190.25	-125.149	-100.195	-61.8085	-7.84519	28.9947	87.9321	132.455
7190.3	-121.792	-98.0592	-65.1654	-7.23483	32.6568	88.5424	130.014
7190.35	-121.487	-102.026	-65.7757	-10.2866	30.5205	87.6269	134.286
7190.4	-125.149	-97.4489	-63.3343	-7.23483	28.9947	85.1855	135.202
7190.45	-124.233	-102.637	-63.6395	-9.67624	32.6568	83.9648	130.929
7190.5	-120.571	-99.8903	-66.9965	-9.67624	28.6895	85.1855	131.845
7190.55	-120.571	-98.9747	-66.3861	-7.23483	31.1309	87.3217	136.422
7190.6	-123.623	-100.195	-64.2499	-9.67624	28.0791	86.4062	131.234
7190.65	-123.318	-95.923	-66.9965	-9.67624	27.774	84.5751	131.234
7190.7	-120.571	-100.195	-66.3861	-5.40378	30.8257	85.4907	134.591
7190.75	-119.961	-99.2799	-64.555	-9.67624	28.6895	87.3217	133.066
7190.8	-123.318	-96.2281	-63.9447	-8.76071	32.6568	87.9321	131.845
7190.85	-121.487	-99.8903	-68.5223	-6.01413	28.9947	85.1855	133.676
7190.9	-120.266	-97.4489	-67.912	-9.37106	34.1827	86.7114	136.117
7190.95	-118.13	-98.0592	-64.2499	-6.31931	29.9102	87.9321	133.066
7191	-122.402	-100.501	-66.6913	-4.48825	34.793	82.4389	133.066
7191.05	-121.181	-95.6178	-68.5223	-7.54001	28.9947	84.5751	135.507
7191.1	-120.571	-98.6696	-68.2172	-5.40378	33.2671	85.4907	133.981
7191.15	-118.13	-99.2799	-65.1654	-5.70895	29.2998	81.2182	131.234
7191.2	-120.876	-94.7023	-67.912	-9.37106	33.8775	84.5751	133.066
7191.25	-124.233	-100.501	-69.4379	-7.23483	30.5205	84.27	136.117
7191.3	-123.013	-99.8903	-67.3016	-6.01413	32.3516	83.6596	131.845
7191.35	-120.266	-96.8385	-64.2499	-9.67624	32.6568	87.3217	131.845
7191.4	-119.961	-102.026	-67.912	-8.45554	32.0464	83.0493	133.981
7191.45	-123.318	-100.195	-70.6586	-7.23483	33.2671	85.7959	134.897
7191.5	-122.097	-95.3126	-69.1327	-9.06589	30.8257	85.7959	130.929
7191.55	-119.961	-100.501	-65.7757	-6.31931	36.6241	85.4907	130.929
7191.6	-117.519	-98.9747	-67.6068	-5.40378	31.4361	89.1528	134.897
7191.65	-120.876	-95.3126	-69.4379	-7.84519	36.3189	85.1855	133.066
7191.7	-122.707	-98.9747	-69.4379	-6.01413	30.8257	89.1528	129.709
7191.75	-122.097	-97.4489	-64.555	-1.74167	33.8775	86.101	130.624
7191.8	-120.571	-94.0919	-65.1654	-5.70895	33.2671	86.101	135.202
7191.85	-119.045	-98.6696	-68.5223	-4.48825	32.0464	88.5424	131.845
7191.9	-121.181	-96.2281	-66.6913	-1.74167	35.7085	85.7959	130.319
7191.95	-121.487	-91.6505	-65.1654	-7.23483	30.2154	90.3735	132.455
7192	-119.961	-96.2281	-63.3343	-6.31931	34.1827	84.8803	134.897
7192.05	-117.214	-94.7023	-67.912	-4.79343	31.4361	86.101	133.066
7192.1	-115.688	-89.8195	-67.6068	-9.67624	31.1309	88.5424	132.76
7192.15	-118.13	-93.7867	-66.0809	-8.76071	34.793	85.4907	134.897
7192.2	-117.214	-94.7023	-63.9447	-6.01413	29.9102	88.8476	137.338
7192.25	-116.604	-92.566	-66.6913	-8.76071	32.9619	84.8803	135.507
7192.3	-114.773	-95.3126	-69.1327	-9.67624	31.1309	85.4907	134.286
7192.35	-113.552	-97.1437	-65.7757	-6.31931	30.2154	89.458	133.981
7192.4	-116.604	-96.2281	-62.724	-6.01413	34.793	85.1855	137.643
7192.45	-118.13	-96.5333	-62.4188	-8.76071	29.9102	86.4062	134.897
7192.5	-116.299	-98.6696	-65.1654	-7.54001	31.7412	88.2373	133.066
7192.55	-113.857	-96.8385	-64.2499	-4.79343	32.6568	84.5751	132.76
7192.6	-112.026	-93.7867	-60.5878	-8.45554	30.8257	86.101	135.507
7192.65	-114.162	-97.4489	-62.4188	-7.54001	35.7085	86.4062	135.812
7192.7	-115.688	-96.2281	-64.2499	-3.8779	31.1309	83.9648	131.54
7192.75	-114.468	-90.1246	-62.1136	-6.92966	31.4361	84.8803	130.624
7192.8	-112.637	-93.4816	-62.724	-8.45554	34.4878	85.7959	130.929
7192.85	-109.585	-94.7023	-64.2499	-7.84519	29.9102	81.5234	132.455
7192.9	-109.89	-91.6505	-61.5033	-6.01413	32.9619	84.27	129.098
7192.95	-112.331	-91.6505	-63.6395	-10.2866	33.2671	85.7959	128.488
7193	-113.857	-93.7867	-63.9447	-9.67624	31.7412	82.1337	129.098
7193.05	-112.331	-93.4816	-60.5878	-6.92966	34.4878	83.6596	131.845
7193.1	-111.416	-90.1246	-64.555	-9.06589	31.1309	85.1855	128.183
7193.15	-109.28	-93.4816	-60.8929	-9.98142	29.2998	81.8286	127.267
7193.2	-110.805	-93.7867	-62.724	-7.54001	33.5723	83.9648	128.488
7193.25	-113.857	-91.9557	-60.5878	-3.26755	28.0791	86.4062	129.709
7193.3	-115.688	-91.9557	-60.5878	-7.84519	29.605	82.4389	125.741
7193.35	-115.383	-93.7867	-60.8929	-7.54001	32.6568	83.6596	128.183
7193.4	-114.773	-92.566	-58.7567	-6.01413	27.774	87.3217	127.572
7193.45	-113.552	-88.9039	-60.8929	-5.0986	31.7412	84.5751	125.131
7193.5	-113.552	-92.2609	-56.3153	-8.45554	34.1827	84.27	129.403
7193.55	-115.993	-93.1764	-60.8929	-8.15036	30.2154	89.1528	126.657
7193.6	-114.773	-90.4298	-56.9257	-5.40378	32.0464	85.7959	126.352
7193.65	-113.857	-88.9039	-61.8085	-7.23483	32.6568	84.8803	130.929
7193.7	-113.247	-93.1764	-56.9257	-9.67624	28.6895	85.4907	128.488
7193.75	-111.721	-93.1764	-63.0292	-9.67624	32.3516	86.101	133.066
7193.8	-110.195	-90.1246	-57.8412	-4.79343	31.1309	83.0493	129.098
7193.85	-112.026	-89.5143	-62.724	-7.54001	29.605	83.6596	132.455
7193.9	-114.162	-93.1764	-59.0619	-9.67624	32.9619	86.7114	130.014
7193.95	-115.993	-90.735	-64.8602	-9.67624	32.3516	82.1337	132.15
7194	-115.383	-86.7677	-60.8929	-6.01413	29.9102	83.3544	133.066
7194.05	-113.247	-88.5988	-64.8602	-8.45554	32.9619	87.0166	133.066
7194.1	-109.89	-91.3453	-62.4188	-9.67624	32.9619	84.27	134.286
7194.15	-113.247	-90.1246	-65.1654	-8.76071	30.8257	83.6596	131.845
7194.2	-114.162	-86.1573	-65.1654	-4.18308	32.9619	85.1855	134.591
7194.25	-112.026	-90.1246	-63.6395	-6.31931	31.7412	87.9321	129.709
7194.3	-108.059	-92.566	-64.8602	-6.92966	31.1309	84.27	133.371
7194.35	-111.111	-91.6505	-59.6722	-5.70895	32.6568	84.5751	130.014
7194.4	-112.026	-87.9884	-63.9447	-3.26755	32.9619	87.6269	132.76
7194.45	-108.669	-91.9557	-59.9774	-4.79343	30.8257	84.27	128.488
7194.5	-107.754	-92.8712	-62.724	-7.84519	33.8775	83.0493	131.234
7194.55	-111.416	-91.3453	-61.5033	-6.92966	34.793	83.6596	128.183
7194.6	-110.805	-88.9039	-60.5878	-6.62448	32.0464	86.7114	132.76
7194.65	-108.669	-90.4298	-62.724	-5.70895	33.8775	81.2182	127.878
7194.7	-111.416	-91.9557	-58.4515	-9.37106	36.0137	81.8286	132.76
7194.75	-109.28	-92.8712	-63.6395	-9.67624	32.3516	84.27	126.657
7194.8	-111.111	-89.5143	-61.8085	-8.76071	33.5723	84.5751	131.234
7194.85	-112.637	-88.5988	-60.8929	-5.70895	36.0137	82.7441	127.267
7194.9	-107.754	-91.9557	-62.1136	-8.76071	31.1309	84.27	129.709
7194.95	-112.637	-91.9557	-58.1464	-9.98142	31.4361	87.0166	129.098
7195	-109.28	-88.9039	-63.3343	-9.67624	34.793	83.9648	128.183
7195.05	-110.805	-86.1573	-61.1981	-7.23483	31.4361	83.3544	131.234
7195.1	-112.637	-88.9039	-59.6722	-7.54001	29.9102	83.9648	126.046
7195.15	-108.364	-89.5143	-62.4188	-9.67624	33.2671	88.5424	131.234
7195.2	-114.468	-89.5143	-57.8412	-9.67624	34.1827	83.9648	125.131
7195.25	-110.805	-86.1573	-62.1136	-6.92966	31.1309	83.6596	127.572
7195.3	-112.637	-89.2091	-62.1136	-7.84519	32.0464	85.1855	126.046
7195.35	-113.552	-91.6505	-58.4515	-9.67624	35.0982	88.2373	124.826
7195.4	-110.5	-91.0402	-62.1136	-7.23483	32.3516	83.6596	130.624
7195.45	-114.468	-91.0402	-59.9774	-6.01413	32.0464	83.3544	126.657
7195.5	-109.89	-89.2091	-61.5033	-9.67624	35.4034	84.8803	128.793
7195.55	-112.331	-91.3453	-62.4188	-8.15036	33.2671	86.7114	127.572
7195.6	-111.416	-92.8712	-58.7567	-6.92966	31.1309	83.3544	127.878
7195.65	-108.669	-91.9557	-63.6395	-9.67624	33.2671	81.8286	133.066
7195.7	-112.942	-90.4298	-62.4188	-6.92966	33.5723	84.8803	128.488
7195.75	-109.89	-87.9884	-59.3671	-9.67624	29.9102	86.7114	130.319
7195.8	-111.111	-92.2609	-64.555	-8.76071	30.2154	83.0493	129.098
7195.85	-112.942	-92.2609	-61.5033	-6.92966	32.0464	81.2182	127.572
7195.9	-109.585	-91.0402	-61.5033	-9.67624	29.9102	81.5234	130.929
7195.95	-114.162	-89.2091	-62.4188	-5.70895	26.8584	85.7959	125.436
7196	-114.468	-87.0729	-58.4515	-9.67624	29.605	84.8803	127.878
7196.05	-110.5	-91.0402	-60.2826	-5.70895	32.0464	83.0493	127.267
7196.1	-114.773	-91.0402	-60.2826	-11.2021	29.2998	84.27	125.741
7196.15	-112.942	-89.5143	-56.0101	-7.23483	29.2998	87.0166	129.403
7196.2	-109.585	-86.1573	-60.2826	-10.5918	31.7412	87.6269	124.215
7196.25	-114.468	-84.3263	-60.2826	-8.15036	35.0982	83.9648	126.352
7196.3	-113.552	-86.1573	-57.536	-11.2021	30.8257	83.3544	129.098
7196.35	-108.364	-87.3781	-62.1136	-9.37106	31.7412	83.9648	124.826
7196.4	-113.857	-86.1573	-60.2826	-10.5918	33.5723	86.101	126.962
7196.45	-112.637	-84.9366	-59.3671	-9.06589	34.1827	82.1337	126.657
7196.5	-108.364	-84.0211	-64.2499	-10.5918	29.9102	79.6923	125.131
7196.55	-112.637	-85.547	-62.4188	-8.76071	31.1309	80.913	129.709
7196.6	-110.805	-89.5143	-60.8929	-7.23483	34.1827	82.4389	125.131
7196.65	-106.838	-90.1246	-64.2499	-7.84519	32.9619	84.27	126.352
7196.7	-111.416	-89.8195	-62.724	-5.40378	30.2154	81.5234	130.014
7196.75	-111.111	-86.7677	-62.4188	-7.23483	30.2154	81.2182	125.131
7196.8	-108.059	-85.2418	-63.3343	-1.74167	32.9619	81.8286	126.962
7196.85	-111.416	-87.0729	-59.6722	-6.31931	32.6568	85.1855	126.962
7196.9	-113.247	-89.5143	-60.2826	-2.04685	30.5205	87.0166	124.826
7196.95	-111.111	-88.2936	-62.1136	-7.54001	29.605	83.3544	127.572
7197	-112.637	-87.6832	-59.6722	-4.18308	32.3516	83.6596	125.131
7197.05	-113.857	-86.4625	-59.9774	-6.92966	29.9102	85.1855	122.69
7197.1	-112.331	-84.3263	-61.8085	-6.01413	27.4688	85.4907	127.878
7197.15	-109.585	-87.3781	-59.6722	-4.79343	28.3843	87.3217	123.91
7197.2	-112.637	-89.5143	-60.2826	-9.06589	30.5205	82.7441	123.605
7197.25	-111.721	-88.2936	-63.0292	-2.96237	31.1309	81.5234	127.878
7197.3	-108.364	-87.9884	-60.5878	-8.76071	28.6895	81.2182	124.521
7197.35	-112.026	-85.547	-60.2826	-7.23483	28.9947	83.6596	126.352
7197.4	-112.026	-88.5988	-63.0292	-7.23483	30.5205	85.4907	130.624
7197.45	-108.059	-89.5143	-60.8929	-8.15036	33.8775	82.7441	126.352
7197.5	-109.28	-88.9039	-59.6722	-5.0986	30.2154	81.8286	127.267
7197.55	-111.416	-86.4625	-63.6395	-9.67624	28.9947	81.5234	130.929
7197.6	-109.89	-90.4298	-63.3343	-6.62448	29.9102	84.5751	126.352
7197.65	-105.923	-91.0402	-58.4515	-5.70895	31.7412	86.7114	126.046
7197.7	-109.89	-87.9884	-63.0292	-6.31931	32.3516	83.9648	128.488
7197.75	-108.974	-93.7867	-62.724	-2.04685	29.2998	82.1337	123.3
7197.8	-105.007	-91.9557	-57.536	-7.84519	29.2998	81.8286	124.826
7197.85	-105.617	-88.5988	-60.5878	-5.40378	30.8257	83.9648	126.657
7197.9	-106.838	-92.566	-59.9774	-4.48825	33.5723	86.101	122.69
7197.95	-104.397	-89.8195	-56.6205	-7.84519	30.2154	87.6269	126.352
7198	-101.04	-90.4298	-56.6205	-2.6572	28.0791	85.7959	129.098
7198.05	-104.397	-91.3453	-58.1464	-6.92966	29.9102	83.9648	126.046
7198.1	-105.007	-85.8522	-55.7049	-6.01413	31.7412	84.8803	127.878
7198.15	-102.261	-91.0402	-53.5687	-2.04685	32.9619	84.5751	132.15
7198.2	-102.566	-87.6832	-58.4515	-6.62448	29.9102	87.6269	128.793
7198.25	-104.397	-89.8195	-57.2308	-3.57273	31.1309	89.1528	129.403
7198.3	-103.786	-88.5988	-53.2635	-4.48825	33.2671	87.3217	133.981
7198.35	-100.429	-85.8522	-57.2308	-6.62448	33.2671	84.27	128.488
7198.4	-103.481	-88.9039	-58.7567	-3.26755	30.2154	84.5751	128.488
7198.45	-106.228	-84.3263	-56.9257	-7.54001	30.8257	85.7959	132.76
7198.5	-104.092	-88.9039	-54.7894	-6.01413	34.793	87.3217	129.709
7198.55	-100.429	-86.7677	-58.4515	-2.96237	29.9102	88.8476	129.709
7198.6	-103.786	-89.5143	-58.4515	-8.45554	31.1309	88.8476	131.54
7198.65	-103.481	-87.9884	-54.4842	-7.23483	33.5723	85.4907	130.319
7198.7	-102.261	-86.1573	-57.2308	-5.0986	28.9947	85.1855	127.878
7198.75	-98.9036	-89.2091	-57.536	-8.15036	32.6568	85.4907	130.929
7198.8	-102.871	-84.9366	-55.7049	-4.79343	31.7412	86.4062	132.455
7198.85	-102.566	-89.2091	-54.1791	-5.40378	30.8257	87.0166	127.878
7198.9	-101.04	-86.1573	-58.1464	-6.92966	34.1827	83.9648	128.488
7198.95	-99.2088	-84.0211	-58.1464	-2.04685	30.5205	81.8286	131.54
7199	-103.481	-85.547	-54.4842	-4.48825	35.0982	82.1337	127.878
7199.05	-104.092	-81.2745	-55.7049	-5.0986	31.1309	86.101	127.267
7199.1	-102.566	-86.1573	-57.8412	-1.43649	33.5723	82.7441	129.709
7199.15	-99.514	-84.3263	-56.6205	-5.40378	32.6568	81.8286	128.793
7199.2	-103.481	-81.8849	-52.9584	-5.0986	33.2671	83.6596	127.267
7199.25	-103.786	-85.547	-55.0946	-2.04685	33.8775	84.27	128.793
[truncated: 6,025 more rows]
