# Supplementary material for: Intrinsic mechanical sensitivity of mammalian auditory neurons as a contributor to sound-driven neural activity
Source: eLife. 2022 Mar 10;11:e74948. doi: 10.7554/eLife.74948 (PMC8942473; doi:10.7554/eLife.74948)
Supplement: Figure 1—figure supplement 4—source data 1. [file elife-74948-fig1-figsupp4-data1.xls]

## Sheet: Figure 1-fig. supplement 4a 
0	-61.1267	0	0		0.2 nA					0	-57.1594				0	-50.5066	0	0		Figure 1- figure supplement 4
0.05	-61.3403	300	0							0.05	-57.0679				0.05	-50.3845	300	0		Chinchilla primary auditory neurons are equally mechanically sensitive.
0.1	-61.2488	Displacement (nm)								0.1	-56.8848				0.1	-50.5066
0.15	-61.1267									0.15	-57.1899				0.15	-50.5981
0.2	-61.3098			Membrane potential (MP) (mV)						0.2	-57.1899				0.2	-50.7202
0.25	-61.2793									0.25	-57.1594				0.25	-50.5981
0.3	-61.1267			Chinchilla Data						0.3	-57.0679				0.3	-50.5981
0.35	-61.3708									0.35	-56.9763				0.35	-50.5066
0.4	-61.2183									0.4	-57.2205				0.4	-50.415
0.45	-61.0657									0.45	-57.1289				0.45	-50.3845
0.5	-61.3708									0.5	-57.0679				0.5	-50.5066
0.55	-61.3403									0.55	-56.7932				0.55	-50.5066
0.6	-61.0046									0.6	-57.0679				0.6	-50.5371
0.65	-61.3098									0.65	-57.1594				0.65	-50.5066
0.7	-61.1877									0.7	-57.0679				0.7	-50.5371
0.75	-61.2183									0.75	-57.0068				0.75	-50.5371
0.8	-60.9741									0.8	-56.8542				0.8	-50.415
0.85	-61.3708									0.85	-57.0679				0.85	-50.3235
0.9	-61.1877									0.9	-57.1594				0.9	-50.354
0.95	-61.0962									0.95	-57.1289				0.95	-50.4761
1	-61.0352									1	-56.9763				1	-50.415
1.05	-61.3708									1.05	-56.8848				1.05	-50.6592
1.1	-61.1267									1.1	-57.1289				1.1	-50.5066
1.15	-60.852									1.15	-57.2815				1.15	-50.415
1.2	-61.1572									1.2	-57.1594				1.2	-50.415
1.25	-61.2793									1.25	-57.0984				1.25	-50.4456
1.3	-61.0962									1.3	-56.8848				1.3	-50.3235
1.35	-60.8826									1.35	-57.251				1.35	-50.2319
1.4	-61.1267									1.4	-57.312				1.4	-50.2319
1.45	-61.2793									1.45	-57.2205				1.45	-50.354
1.5	-61.1267									1.5	-57.2815				1.5	-50.4456
1.55	-60.791									1.55	-57.1899				1.55	-50.4761
1.6	-61.1877									1.6	-57.1594				1.6	-50.3845
1.65	-61.2488									1.65	-57.312				1.65	-50.4761
1.7	-61.2488									1.7	-57.3425				1.7	-50.415
1.75	-60.7605									1.75	-57.2815				1.75	-50.2624
1.8	-61.0352									1.8	-57.1899				1.8	-50.1404
1.85	-61.1877									1.85	-57.0984				1.85	-50.1099
1.9	-61.2488									1.9	-57.251				1.9	-50.354
1.95	-60.9436									1.95	-57.4341				1.95	-50.3235
2	-60.9741									2	-57.373				2	-50.293
2.05	-61.3098									2.05	-57.373				2.05	-50.1709
2.1	-61.1267									2.1	-57.251				2.1	-50.0793
2.15	-61.0046									2.15	-57.251				2.15	-50.2014
2.2	-60.9131									2.2	-57.1899				2.2	-50.2624
2.25	-61.1877									2.25	-57.4951				2.25	-50.1099
2.3	-61.2183									2.3	-57.4951				2.3	-49.9268
2.35	-61.0962									2.35	-57.4036				2.35	-50.2624
2.4	-60.8826									2.4	-57.4036				2.4	-50.1404
2.45	-61.0352									2.45	-57.2205				2.45	-49.8352
2.5	-61.2793									2.5	-57.1899				2.5	-50.1404
2.55	-61.0657									2.55	-57.4341				2.55	-50.1404
2.6	-60.9436									2.6	-57.4646				2.6	-49.7742
2.65	-60.9131									2.65	-57.4036				2.65	-49.9878
2.7	-61.1267									2.7	-57.4036				2.7	-50.0183
2.75	-61.2488									2.75	-57.4036				2.75	-49.7742
2.8	-61.0046									2.8	-57.2205				2.8	-50.0488
2.85	-61.0657									2.85	-57.251				2.85	-49.9878
2.9	-60.8215									2.9	-57.4951				2.9	-49.7742
2.95	-61.2488									2.95	-57.5561				2.95	-49.9878
3	-61.1267									3	-57.4646				3	-49.9573
3.05	-61.0962									3.05	-57.4341				3.05	-49.7436
3.1	-60.9741									3.1	-57.5256				3.1	-50.1099
3.15	-60.9131									3.15	-57.373				3.15	-49.8962
3.2	-61.1877									3.2	-57.251				3.2	-49.9573
3.25	-61.0962									3.25	-57.4341				3.25	-49.9573
3.3	-61.0657									3.3	-57.6172				3.3	-49.9268
3.35	-60.9436									3.35	-57.6172				3.35	-50.0183
3.4	-60.8215									3.4	-57.4951				3.4	-50.0183
3.45	-61.0352									3.45	-57.5867				3.45	-49.9268
3.5	-61.2488									3.5	-57.5867				3.5	-49.9878
3.55	-61.1572									3.55	-57.4341				3.55	-50.1709
3.6	-61.0352									3.6	-57.3425				3.6	-49.8962
3.65	-60.8215									3.65	-57.4341				3.65	-49.8962
3.7	-60.9741									3.7	-57.5256				3.7	-50.1709
3.75	-61.2183									3.75	-57.6172				3.75	-50.1709
3.8	-61.1877									3.8	-57.6172				3.8	-49.8352
3.85	-61.0962									3.85	-57.6172				3.85	-50.1709
3.9	-61.0962									3.9	-57.6782				3.9	-50.2014
3.95	-60.9131									3.95	-57.4951				3.95	-50.1099
4	-61.1267									4	-57.373				4	-49.9878
4.05	-61.2183									4.05	-57.6172				4.05	-50.2014
4.1	-61.2488									4.1	-57.8308				4.1	-50.1709
4.15	-61.1572									4.15	-57.6782				4.15	-49.9268
4.2	-61.1267									4.2	-57.5867				4.2	-50.2319
4.25	-60.8826									4.25	-57.4951				4.25	-50.2319
4.3	-61.0962									4.3	-57.8003				4.3	-50.2319
4.35	-61.2183									4.35	-57.7393				4.35	-49.9878
4.4	-61.3098									4.4	-57.5256				4.4	-50.3845
4.45	-61.2793									4.45	-57.5867				4.45	-50.2319
4.5	-61.2183									4.5	-57.8308				4.5	-50.2014
4.55	-61.0352									4.55	-57.6172				4.55	-50.0793
4.6	-60.9741									4.6	-57.5256				4.6	-50.415
4.65	-61.2183									4.65	-57.8308				4.65	-50.3235
4.7	-61.3708									4.7	-57.7393				4.7	-50.2014
4.75	-61.2793									4.75	-57.6172				4.75	-50.2014
4.8	-61.1877									4.8	-57.7393				4.8	-50.4456
4.85	-61.1572									4.85	-57.6782				4.85	-50.3235
4.9	-61.0962									4.9	-57.8003				4.9	-50.2014
4.95	-61.1572									4.95	-57.7698				4.95	-50.2624
5	-61.2488									5	-57.4951				5	-50.4761
5.05	-61.3403									5.05	-57.8308				5.05	-50.4456
5.1	-61.2488									5.1	-57.7698				5.1	-50.354
5.15	-61.3098									5.15	-57.4951				5.15	-50.293
5.2	-61.2183									5.2	-57.6477				5.2	-50.5066
5.25	-61.0352									5.25	-57.5867				5.25	-50.5066
5.3	-61.0046									5.3	-57.7698				5.3	-50.4456
5.35	-61.2488									5.35	-57.6477				5.35	-50.3235
5.4	-61.2793									5.4	-57.4036				5.4	-50.4761
5.45	-61.2488									5.45	-57.7698				5.45	-50.6287
5.5	-61.2793									5.5	-57.6782				5.5	-50.5676
5.55	-61.2488									5.55	-57.5561				5.55	-50.5066
5.6	-61.2183									5.6	-57.7393				5.6	-50.3845
5.65	-61.1267									5.65	-57.6172				5.65	-50.4761
5.7	-60.9741									5.7	-57.6782				5.7	-50.5066
5.75	-61.1572									5.75	-57.6477				5.75	-50.5066
5.8	-61.2488									5.8	-57.5867				5.8	-50.3235
5.85	-61.2793									5.85	-57.6172				5.85	-50.354
5.9	-61.1877									5.9	-57.8308				5.9	-50.4761
5.95	-61.1572									5.95	-57.5867				5.95	-50.4761
6	-61.2183									6	-57.5561				6	-50.3235
6.05	-61.0657									6.05	-57.8003				6.05	-50.1404
6.1	-61.0046									6.1	-57.7698				6.1	-50.2624
6.15	-60.9131									6.15	-57.4646				6.15	-50.415
6.2	-61.0352									6.2	-57.8003				6.2	-50.415
6.25	-61.0352									6.25	-57.8003				6.25	-50.1709
6.3	-61.1877									6.3	-57.5867				6.3	-49.9878
6.35	-61.1877									6.35	-57.7087				6.35	-50.293
6.4	-61.2183									6.4	-57.7393				6.4	-50.2624
6.45	-61.0352									6.45	-57.6782				6.45	-50.2624
6.5	-61.1267									6.5	-57.5867				6.5	-50.1404
6.55	-61.1267									6.55	-57.7698				6.55	-49.9268
6.6	-61.0657									6.6	-57.8003				6.6	-50.1709
6.65	-60.9741									6.65	-57.4951				6.65	-50.293
6.7	-60.791									6.7	-57.8918				6.7	-50.293
6.75	-60.9131									6.75	-57.7393				6.75	-50.2014
6.8	-61.1877									6.8	-57.7087				6.8	-49.9573
6.85	-61.2183									6.85	-57.5561				6.85	-50.1709
6.9	-61.2488									6.9	-57.9224				6.9	-50.354
6.95	-61.2183									6.95	-57.6782				6.95	-50.2624
7	-61.1572									7	-57.6477				7	-50.3235
7.05	-61.0352									7.05	-57.7393				7.05	-50.0793
7.1	-60.852									7.1	-57.8613				7.1	-50.0183
7.15	-61.0352									7.15	-57.7698				7.15	-50.293
7.2	-61.2488									7.2	-57.4951				7.2	-50.4456
7.25	-61.1572									7.25	-57.8308				7.25	-50.2624
7.3	-61.1267									7.3	-57.7698				7.3	-50.2319
7.35	-60.9436									7.35	-57.6477				7.35	-50.1404
7.4	-61.1572									7.4	-57.4646				7.4	-50.1709
7.45	-61.1267									7.45	-57.8003				7.45	-50.4456
7.5	-61.0352									7.5	-57.8003				7.5	-50.415
7.55	-61.0352									7.55	-57.6172				7.55	-50.3845
7.6	-61.2793									7.6	-57.5256				7.6	-50.354
7.65	-61.1572									7.65	-57.8308				7.65	-50.2624
7.7	-60.9131									7.7	-57.7393				7.7	-50.2014
7.75	-61.3708									7.75	-57.5561				7.75	-50.3845
7.8	-61.1572									7.8	-57.4951				7.8	-50.5371
7.85	-60.7605									7.85	-57.8613				7.85	-50.4456
7.9	-61.2488									7.9	-57.7698				7.9	-50.4456
7.95	-61.2183									7.95	-57.6477				7.95	-50.293
8	-60.9436									8	-57.5256				8	-50.2319
8.05	-61.2793									8.05	-57.8308				8.05	-50.2014
8.1	-61.1267									8.1	-57.8613				8.1	-50.5066
8.15	-61.0657									8.15	-57.7393				8.15	-50.4456
8.2	-61.3098									8.2	-57.4951				8.2	-50.3845
8.25	-61.0046									8.25	-57.8003				8.25	-50.3845
8.3	-61.0962									8.3	-57.8918				8.3	-50.293
8.35	-61.2488									8.35	-57.7087				8.35	-50.1404
8.4	-61.1877									8.4	-57.5256				8.4	-50.0488
8.45	-61.0657									8.45	-57.6477				8.45	-50.2624
8.5	-61.1267									8.5	-57.9224				8.5	-50.4761
8.55	-61.0962									8.55	-57.6172				8.55	-50.354
8.6	-61.1267									8.6	-57.5867				8.6	-50.354
8.65	-61.2183									8.65	-57.4951				8.65	-50.293
8.7	-61.1572									8.7	-57.7698				8.7	-50.1404
8.75	-61.0657									8.75	-57.6477				8.75	-50.1099
8.8	-61.3403									8.8	-57.5867				8.8	-50.1404
8.85	-61.2488									8.85	-57.5867				8.85	-50.3235
8.9	-60.9131									8.9	-57.4951				8.9	-50.3845
8.95	-61.3098									8.95	-57.7087				8.95	-50.415
9	-61.2183									9	-57.5561				9	-50.3235
9.05	-61.1267									9.05	-57.6172				9.05	-50.415
9.1	-61.0962									9.1	-57.4341				9.1	-50.293
9.15	-61.3098									9.15	-57.3425				9.15	-50.2624
9.2	-61.1572									9.2	-57.5867				9.2	-50.2014
9.25	-60.9436									9.25	-57.5867				9.25	-50.2624
9.3	-61.0962									9.3	-57.5561				9.3	-50.415
9.35	-61.2488									9.35	-57.2815				9.35	-50.5066
9.4	-61.1877									9.4	-57.4036				9.4	-50.5066
9.45	-60.9741									9.45	-57.5867				9.45	-50.5066
9.5	-61.1877									9.5	-57.4341				9.5	-50.4761
9.55	-61.1877									9.55	-57.4036				9.55	-50.415
9.6	-61.1572									9.6	-57.2815				9.6	-50.3235
9.65	-60.9436									9.65	-57.373				9.65	-50.354
9.7	-61.2183									9.7	-57.5867				9.7	-50.293
9.75	-61.2488									9.75	-57.4036				9.75	-50.1099
9.8	-61.1572									9.8	-57.373				9.8	-50.3235
9.85	-61.0046									9.85	-57.312				9.85	-50.5676
9.9	-61.2183									9.9	-57.1289				9.9	-50.5676
9.95	-61.1877									9.95	-57.3425				9.95	-50.5981
10	-61.1877									10	-57.4646				10	-50.3845
10.05	-60.9436									10.05	-57.373				10.05	-50.5066
10.1	-61.1267									10.1	-57.312				10.1	-50.415
10.15	-61.1877									10.15	-57.1899				10.15	-50.3235
10.2	-61.2183									10.2	-57.0984				10.2	-50.2014
10.25	-60.9741									10.25	-57.3425				10.25	-50.5066
10.3	-61.0962									10.3	-57.373				10.3	-50.5981
10.35	-61.2183									10.35	-57.312				10.35	-50.5371
10.4	-61.2183									10.4	-57.2205				10.4	-50.3845
10.45	-61.0657									10.45	-57.1289				10.45	-50.3235
10.5	-60.9741									10.5	-57.0679				10.5	-50.6592
10.55	-61.1572									10.55	-57.2205				10.55	-50.5981
10.6	-61.1572									10.6	-57.2815				10.6	-50.5371
10.65	-61.0962									10.65	-57.1899				10.65	-50.5066
10.7	-60.8215									10.7	-57.1594				10.7	-50.6897
10.75	-61.1572									10.75	-57.0679				10.75	-50.6592
10.8	-61.2488									10.8	-56.9153				10.8	-50.5066
10.85	-61.0962									10.85	-57.1594				10.85	-50.7202
10.9	-61.0046									10.9	-57.2815				10.9	-50.7202
10.95	-60.8826									10.95	-57.251				10.95	-50.4456
11	-61.2488									11	-57.1594				11	-50.8118
11.05	-61.1877									11.05	-57.251				11.05	-50.7507
11.1	-61.2183									11.1	-57.0679				11.1	-50.5371
11.15	-61.0046									11.15	-57.0068				11.15	-50.9033
11.2	-61.0657									11.2	-57.1594				11.2	-50.6592
11.25	-61.2488									11.25	-57.373				11.25	-50.6592
11.3	-61.0962									11.3	-57.312				11.3	-50.8423
11.35	-61.1267									11.35	-57.251				11.35	-50.6897
11.4	-61.0657									11.4	-57.1899				11.4	-50.7507
11.45	-60.9741									11.45	-57.1899				11.45	-50.7812
11.5	-61.1267									11.5	-57.0984				11.5	-50.6897
11.55	-61.0657									11.55	-57.0068				11.55	-50.9949
11.6	-61.1572									11.6	-57.1899				11.6	-50.8118
11.65	-61.0657									11.65	-57.4036				11.65	-50.5676
11.7	-60.8215									11.7	-57.2815				11.7	-51.1169
11.75	-61.0962									11.75	-57.251				11.75	-50.9644
11.8	-61.2488									11.8	-57.2205				11.8	-50.6287
11.85	-61.1877									11.85	-57.2815				11.85	-50.9949
11.9	-61.0352									11.9	-57.1594				11.9	-50.8728
11.95	-60.852									11.95	-57.0679				11.95	-50.7507
12	-61.1267									12	-57.0984				12	-50.9033
12.05	-61.2793									12.05	-57.4036				12.05	-50.9033
12.1	-61.0962									12.1	-57.4036				12.1	-50.8423
12.15	-61.0657									12.15	-57.373				12.15	-50.7202
12.2	-60.9436									12.2	-57.312				12.2	-50.9338
12.25	-60.852									12.25	-57.4036				12.25	-50.9033
12.3	-61.0046									12.3	-57.251				12.3	-50.6592
12.35	-61.1267									12.35	-57.2205				12.35	-50.9033
12.4	-61.0962									12.4	-57.3425				12.4	-50.9033
12.45	-61.0962									12.45	-57.373				12.45	-50.7507
12.5	-60.9131									12.5	-57.312				12.5	-50.6287
12.55	-60.7605									12.55	-57.1899				12.55	-50.9644
12.6	-60.9741									12.6	-57.1289				12.6	-50.8118
12.65	-61.0962									12.65	-57.4951				12.65	-50.7507
12.7	-61.0046									12.7	-57.2815				12.7	-50.7812
12.75	-60.9131									12.75	-57.2205				12.75	-50.9338
12.8	-60.8826									12.8	-57.312				12.8	-50.8728
12.85	-60.6995									12.85	-57.4036				12.85	-50.6592
12.9	-60.8215									12.9	-57.1594				12.9	-50.7507
12.95	-60.8826									12.95	-57.312				12.95	-50.9644
13	-60.9436									13	-57.312				13	-50.9033
13.05	-60.852									13.05	-57.2205				13.05	-50.6897
13.1	-60.9436									13.1	-57.312				13.1	-50.8728
13.15	-60.791									13.15	-57.2815				13.15	-50.9949
13.2	-60.6079									13.2	-57.0373				13.2	-50.9338
13.25	-60.6995									13.25	-57.4646				13.25	-50.6897
13.3	-60.8826									13.3	-57.2205				13.3	-50.7812
13.35	-60.9436									13.35	-57.1899				13.35	-50.9644
13.4	-60.852									13.4	-57.2205				13.4	-50.9644
13.45	-60.8215									13.45	-57.2205				13.45	-50.7202
13.5	-60.7605									13.5	-57.312				13.5	-50.7507
13.55	-60.6689									13.55	-57.1594				13.55	-50.9949
13.6	-60.5469									13.6	-56.9458				13.6	-50.9033
13.65	-60.7605									13.65	-57.312				13.65	-50.6287
13.7	-60.9131									13.7	-57.1594				13.7	-50.6287
13.75	-60.852									13.75	-57.0984				13.75	-50.9033
13.8	-60.8215									13.8	-57.0984				13.8	-50.8728
13.85	-60.852									13.85	-57.0373				13.85	-50.6897
13.9	-60.7605									13.9	-57.1594				13.9	-50.5371
13.95	-60.6384									13.95	-57.1899				13.95	-50.8118
14	-60.4553									14	-56.8542				14	-50.7812
14.05	-60.6995									14.05	-57.2205				14.05	-50.8118
14.1	-60.791									14.1	-57.1289				14.1	-50.5676
14.15	-60.9131									14.15	-56.9458				14.15	-50.6287
14.2	-60.791									14.2	-57.1289				14.2	-50.7812
14.25	-60.791									14.25	-57.2205				14.25	-50.7812
14.3	-60.791									14.3	-56.9153				14.3	-50.6897
14.35	-60.7605									14.35	-57.1289				14.35	-50.4456
14.4	-60.6689									14.4	-57.0679				14.4	-50.7202
14.45	-60.6384									14.45	-56.9763				14.45	-50.8423
14.5	-60.4858									14.5	-57.0679				14.5	-50.7507
14.55	-60.6384									14.55	-57.0984				14.55	-50.6897
14.6	-60.791									14.6	-56.9763				14.6	-50.6287
14.65	-60.9131									14.65	-56.8542				14.65	-50.7812
14.7	-60.9131									14.7	-57.2815				14.7	-50.8728
14.75	-60.73									14.75	-57.0373				14.75	-50.8118
14.8	-60.7605									14.8	-56.7932				14.8	-50.8118
14.85	-60.8215									14.85	-57.0373				14.85	-50.6592
14.9	-60.791									14.9	-57.0984				14.9	-50.8118
14.95	-60.5774									14.95	-56.9763				14.95	-50.9644
15	-60.5164									15	-56.8237				15	-50.9033
15.05	-60.4553									15.05	-57.1594				15.05	-50.9338
15.1	-60.6079									15.1	-57.0679				15.1	-50.7202
15.15	-60.6689									15.15	-56.8542				15.15	-50.8118
15.2	-60.8215									15.2	-57.0984				15.2	-51.1475
15.25	-60.852									15.25	-57.0984				15.25	-51.0559
15.3	-60.8215									15.3	-57.0984				15.3	-50.9644
15.35	-60.6995									15.35	-56.7932				15.35	-50.8728
15.4	-60.6384									15.4	-57.1899				15.4	-50.8423
15.45	-60.4553									15.45	-57.0679				15.45	-51.0254
15.5	-60.7605									15.5	-57.0373				15.5	-51.1475
15.55	-60.8215									15.55	-56.8848				15.55	-51.0559
15.6	-60.6689									15.6	-57.1594				15.6	-51.0864
15.65	-60.6384									15.65	-57.0984				15.65	-51.0254
15.7	-60.5774									15.7	-56.9458				15.7	-50.8728
15.75	-60.73									15.75	-57.0068				15.75	-51.1475
15.8	-60.6689									15.8	-57.1289				15.8	-51.239
15.85	-60.5469									15.85	-57.1899				15.85	-51.2085
15.9	-60.6995									15.9	-57.0068				15.9	-51.1169
15.95	-60.6689									15.95	-57.1594				15.95	-51.0254
16	-60.6079									16	-57.2205				16	-50.9949
16.05	-60.6079									16.05	-57.1899				16.05	-51.1169
16.1	-60.6995									16.1	-56.9763				16.1	-51.239
16.15	-60.6079									16.15	-57.1289				16.15	-51.1169
16.2	-60.5164									16.2	-57.2815				16.2	-51.178
16.25	-60.73									16.25	-57.1289				16.25	-51.1169
16.3	-60.5469									16.3	-56.9763				16.3	-50.9644
16.35	-60.6689									16.35	-57.0068				16.35	-51.0254
16.4	-60.6995									16.4	-57.2205				16.4	-51.178
16.45	-60.4248									16.45	-57.2205				16.45	-51.239
16.5	-60.791									16.5	-56.9763				16.5	-51.2085
16.55	-60.73									16.55	-57.0068				16.55	-51.178
16.6	-60.4553									16.6	-57.251				16.6	-51.1169
16.65	-60.7605									16.65	-57.1289				16.65	-50.9033
16.7	-60.7605									16.7	-57.0373				16.7	-50.9644
16.75	-60.5164									16.75	-56.8848				16.75	-51.239
16.8	-60.8215									16.8	-57.1594				16.8	-51.3611
16.85	-60.73									16.85	-57.1594				16.85	-51.2695
16.9	-60.4248									16.9	-57.1594				16.9	-51.1475
16.95	-60.8215									16.95	-56.8848				16.95	-51.178
17	-60.7605									17	-57.0679				17	-51.0254
17.05	-60.4858									17.05	-57.1899				17.05	-51.0254
17.1	-60.791									17.1	-57.1289				17.1	-51.1475
17.15	-60.6995									17.15	-57.0373				17.15	-51.2695
17.2	-60.6384									17.2	-56.9153				17.2	-51.3611
17.25	-60.6384									17.25	-57.2205				17.25	-51.239
17.3	-60.8215									17.3	-57.2205				17.3	-51.239
17.35	-60.6995									17.35	-57.1289				17.35	-51.2085
17.4	-60.5469									17.4	-57.0984				17.4	-51.0864
17.45	-60.6995									17.45	-57.0984				17.45	-50.9338
17.5	-60.7605									17.5	-57.312				17.5	-51.0254
17.55	-60.5469									17.55	-57.251				17.55	-51.1475
17.6	-60.5469									17.6	-57.2815				17.6	-51.2695
17.65	-60.73									17.65	-57.251				17.65	-51.3306
17.7	-60.8215									17.7	-57.1289				17.7	-51.239
17.75	-60.4858									17.75	-57.4036				17.75	-51.2085
17.8	-60.6995									17.8	-57.4646				17.8	-51.1169
17.85	-60.791									17.85	-57.4341				17.85	-51.0864
17.9	-60.791									17.9	-57.312				17.9	-51.0864
17.95	-60.4858									17.95	-57.1594				17.95	-50.9338
18	-60.6995									18	-57.4341				18	-50.9949
18.05	-60.791									18.05	-57.5867				18.05	-51.1169
18.1	-60.8215									18.1	-57.4341				18.1	-51.2085
18.15	-60.6384									18.15	-57.3425				18.15	-51.3
18.2	-60.73									18.2	-57.1289				18.2	-51.1475
18.25	-60.8826									18.25	-57.4341				18.25	-51.0864
18.3	-60.852									18.3	-57.5256				18.3	-51.0254
18.35	-60.6995									18.35	-57.4036				18.35	-51.1475
18.4	-60.6995									18.4	-57.4341				18.4	-50.9033
18.45	-60.8826									18.45	-57.373				18.45	-50.8423
18.5	-60.8215									18.5	-57.0984				18.5	-50.9949
18.55	-60.73									18.55	-57.3425				18.55	-51.178
18.6	-60.5774									18.6	-57.4951				18.6	-51.1169
18.65	-60.852									18.65	-57.4341				18.65	-51.1169
18.7	-60.791									18.7	-57.3425				18.7	-50.9949
18.75	-60.7605									18.75	-57.2815				18.75	-50.8728
18.8	-60.5164									18.8	-57.2205				18.8	-51.2085
18.85	-60.852									18.85	-57.4341				18.85	-51.0254
18.9	-60.7605									18.9	-57.4036				18.9	-51.0559
18.95	-60.791									18.95	-57.373				18.95	-50.9644
19	-60.4858									19	-57.373				19	-51.178
19.05	-60.6689									19.05	-57.4036				19.05	-51.0864
19.1	-60.8826									19.1	-57.0984				19.1	-50.9033
19.15	-60.791									19.15	-57.251				19.15	-51.239
19.2	-60.6384									19.2	-57.4646				19.2	-51.1169
19.25	-60.4553									19.25	-57.4951				19.25	-50.8118
19.3	-60.8215									19.3	-57.3425				19.3	-51.239
19.35	-60.791									19.35	-57.4036				19.35	-51.178
19.4	-60.7605									19.4	-57.251				19.4	-50.7812
19.45	-60.5469									19.45	-57.1594				19.45	-51.239
19.5	-60.5164									19.5	-57.2815				19.5	-51.2085
19.55	-60.8215									19.55	-57.373				19.55	-50.9033
19.6	-60.73									19.6	-57.4341				19.6	-51.1475
19.65	-60.7605									19.65	-57.4036				19.65	-51.0864
19.7	-60.4858									19.7	-57.251				19.7	-50.9949
19.75	-60.5164									19.75	-57.1289				19.75	-51.2085
19.8	-60.852									19.8	-57.0373				19.8	-50.8423
19.85	-60.6995									19.85	-57.1594				19.85	-50.9644
19.9	-60.6689									19.9	-57.2815				19.9	-51.0864
19.95	-60.5469									19.95	-57.2815				19.95	-50.9338
20	-60.6079									20	-57.2815				20	-50.9949
20.05	-60.791									20.05	-57.3425				20.05	-50.9949
20.1	-60.6995									20.1	-57.1899				20.1	-50.9644
20.15	-60.6995									20.15	-57.1289				20.15	-51.0559
20.2	-60.5774									20.2	-57.0679				20.2	-51.1475
20.25	-60.4553									20.25	-57.0679				20.25	-50.9338
20.3	-60.6689									20.3	-57.1899				20.3	-50.9338
20.35	-60.791									20.35	-57.251				20.35	-51.2085
20.4	-60.6995									20.4	-57.2815				20.4	-51.0864
20.45	-60.6995									20.45	-57.2815				20.45	-50.8118
20.5	-60.5164									20.5	-57.0679				20.5	-51.178
20.55	-60.5774									20.55	-57.0068				20.55	-51.1475
20.6	-60.73									20.6	-57.0068				20.6	-50.9644
20.65	-60.7605									20.65	-56.9153				20.65	-51.0559
20.7	-60.7605									20.7	-57.0984				20.7	-51.0864
20.75	-60.791									20.75	-57.1594				20.75	-51.1169
20.8	-60.4553									20.8	-57.0373				20.8	-50.8118
20.85	-60.5164									20.85	-57.0373				20.85	-51.178
20.9	-60.6689									20.9	-56.8848				20.9	-51.0864
20.95	-60.852									20.95	-57.1594				20.95	-51.0559
21	-60.6384									21	-57.0984				21	-50.8423
21.05	-60.73									21.05	-57.0373				21.05	-51.1475
21.1	-60.5164									21.1	-56.9458				21.1	-51.0864
21.15	-60.5774									21.15	-57.2205				21.15	-51.0254
21.2	-60.73									21.2	-57.1289				21.2	-50.9033
21.25	-60.7605									21.25	-56.9458				21.25	-51.1475
21.3	-60.7605									21.3	-57.1594				21.3	-51.1169
21.35	-60.6689									21.35	-57.0679				21.35	-51.0559
21.4	-60.6384									21.4	-56.9458				21.4	-50.9949
21.45	-60.4858									21.45	-57.251				21.45	-51.0864
21.5	-60.5164									21.5	-56.9763				21.5	-51.0559
21.55	-60.73									21.55	-57.1594				21.55	-51.0254
21.6	-60.8215									21.6	-57.251				21.6	-50.9338
21.65	-60.6995									21.65	-56.9153				21.65	-51.1169
21.7	-60.6689									21.7	-57.1594				21.7	-51.0254
21.75	-60.6995									21.75	-57.0984				21.75	-51.0559
21.8	-60.6079									21.8	-56.9458				21.8	-50.8423
21.85	-60.4858									21.85	-57.2205				21.85	-51.0864
21.9	-60.6079									21.9	-56.9458				21.9	-51.0254
21.95	-60.7605									21.95	-57.1289				21.95	-50.9949
22	-60.8215									22	-57.1899				22	-50.6897
22.05	-60.6995									22.05	-56.9153				22.05	-50.9644
22.1	-60.6689									22.1	-57.1899				22.1	-50.9949
22.15	-60.5469									22.15	-57.0984				22.15	-50.9644
22.2	-60.6079									22.2	-57.0373				22.2	-50.7202
22.25	-60.4553									22.25	-57.251				22.25	-50.7812
22.3	-60.6384									22.3	-57.0373				22.3	-50.9644
22.35	-60.8215									22.35	-57.0679				22.35	-50.9338
22.4	-60.8215									22.4	-57.2205				22.4	-50.8728
22.45	-60.6995									22.45	-57.1594				22.45	-50.5981
22.5	-60.6079									22.5	-57.0679				22.5	-50.8728
22.55	-60.6689									22.55	-57.2205				22.55	-50.9338
22.6	-60.5774									22.6	-57.1899				22.6	-50.8728
22.65	-60.5164									22.65	-57.0373				22.65	-50.7507
22.7	-60.4248									22.7	-57.251				22.7	-50.6592
22.75	-60.6079									22.75	-57.1899				22.75	-50.9338
22.8	-60.791									22.8	-57.0068				22.8	-50.9644
22.85	-60.791									22.85	-57.2815				22.85	-50.8728
22.9	-60.73									22.9	-57.2205				22.9	-50.7507
22.95	-60.6689									22.95	-57.0373				22.95	-50.7202
23	-60.791									23	-57.2815				23	-51.0254
23.05	-60.73									23.05	-57.2205				23.05	-50.9033
23.1	-60.6384									23.1	-57.1899				23.1	-50.8728
23.15	-60.4858									23.15	-57.0984				23.15	-50.7507
23.2	-60.5164									23.2	-57.4341				23.2	-50.6592
23.25	-60.4858									23.25	-57.312				23.25	-50.8728
23.3	-60.6689									23.3	-57.0984				23.3	-50.8118
23.35	-60.791									23.35	-57.373				23.35	-50.7507
23.4	-60.8215									23.4	-57.3425				23.4	-50.6287
23.45	-60.8215									23.45	-57.2815				23.45	-50.6287
23.5	-60.73									23.5	-57.1289				23.5	-50.6897
23.55	-60.73									23.55	-57.4646				23.55	-50.8118
23.6	-60.7605									23.6	-57.4951				23.6	-50.8423
23.65	-60.6384									23.65	-57.251				23.65	-50.7202
23.7	-60.6079									23.7	-57.373				23.7	-50.5371
23.75	-60.7605									23.75	-57.4341				23.75	-50.4761
23.8	-60.9131									23.8	-57.4951				23.8	-50.8728
23.85	-60.791									23.85	-57.2205				23.85	-50.7507
23.9	-60.6995									23.9	-57.4341				23.9	-50.6592
23.95	-60.5469									23.95	-57.373				23.95	-50.5066
24	-60.852									24	-57.373				24	-50.4456
24.05	-60.7605									24.05	-57.2205				24.05	-50.5371
24.1	-60.7605									24.1	-57.4646				24.1	-50.7202
24.15	-60.5469									24.15	-57.373				24.15	-50.6897
24.2	-60.9436									24.2	-57.4036				24.2	-50.6287
24.25	-60.852									24.25	-57.0679				24.25	-50.5676
24.3	-60.6079									24.3	-57.4646				24.3	-50.3845
24.35	-60.8215									24.35	-57.4036				24.35	-50.3845
24.4	-60.8826									24.4	-57.373				24.4	-50.5676
24.45	-60.5774									24.45	-57.0373				24.45	-50.5981
24.5	-60.8215									24.5	-57.4036				24.5	-50.5676
24.55	-60.791									24.55	-57.3425				24.55	-50.5066
24.6	-60.73									24.6	-57.4036				24.6	-50.293
24.65	-60.8826									24.65	-57.1289				24.65	-50.3235
24.7	-60.7605									24.7	-57.4341				24.7	-50.415
24.75	-60.5774									24.75	-57.4341				24.75	-50.5981
24.8	-60.9741									24.8	-57.4341				24.8	-50.6287
24.85	-60.8826									24.85	-57.1899				24.85	-50.5981
24.9	-60.4858									24.9	-57.4036				24.9	-50.4761
24.95	-60.852									24.95	-57.4341				24.95	-50.3845
25	-60.9131									25	-57.373				25	-50.293
25.05	-60.6689									25.05	-57.2205				25.05	-50.415
25.1	-60.8826									25.1	-57.2205				25.1	-50.5371
25.15	-60.791									25.15	-57.4646				25.15	-50.5676
25.2	-60.6995									25.2	-57.3425				25.2	-50.5066
25.25	-60.9131									25.25	-57.312				25.25	-50.5371
25.3	-60.8215									25.3	-57.0679				25.3	-50.4456
25.35	-60.5164									25.35	-57.251				25.35	-50.2624
25.4	-60.9131									25.4	-57.4036				25.4	-50.1709
25.45	-60.8826									25.45	-57.2815				25.45	-50.2624
25.5	-60.5774									25.5	-57.1594				25.5	-50.4456
25.55	-60.8215									25.55	-57.0984				25.55	-50.354
25.6	-60.852									25.6	-57.4341				25.6	-50.293
25.65	-60.7605									25.65	-57.2815				25.65	-50.293
25.7	-60.6689									25.7	-57.2205				25.7	-50.2624
25.75	-60.9436									25.75	-57.0373				25.75	-50.1709
25.8	-60.8826									25.8	-57.251				25.8	-50.1099
25.85	-60.6384									25.85	-57.3425				25.85	-50.0793
25.9	-60.7605									25.9	-57.2205				25.9	-50.1404
25.95	-60.8215									25.95	-57.251				25.95	-50.3235
26	-60.852									26	-57.1289				26	-50.293
26.05	-60.6079									26.05	-57.1594				26.05	-50.2624
26.1	-60.8215									26.1	-57.4341				26.1	-50.1709
26.15	-60.791									26.15	-57.2815				26.15	-50.2319
26.2	-60.8215									26.2	-57.2205				26.2	-50.1099
26.25	-60.6384									26.25	-57.0679				26.25	-49.9573
26.3	-60.9131									26.3	-57.0068				26.3	-49.9573
26.35	-60.8215									26.35	-57.1899				26.35	-49.8657
26.4	-60.8215									26.4	-57.312				26.4	-49.9878
26.45	-60.6384									26.45	-57.2205				26.45	-49.9878
26.5	-60.9436									26.5	-57.1289				26.5	-50.2319
26.55	-60.8826									26.55	-56.9458				26.55	-50.1709
26.6	-60.791									26.6	-57.1594				26.6	-50.1099
26.65	-60.5469									26.65	-57.3425				26.65	-50.1099
26.7	-61.0046									26.7	-57.1899				26.7	-50.1099
26.75	-60.8826									26.75	-57.2205				26.75	-50.0488
26.8	-60.9131									26.8	-57.1289				26.8	-49.9573
26.85	-60.6079									26.85	-57.0068				26.85	-49.9573
26.9	-60.9131									26.9	-57.2205				26.9	-50.2319
26.95	-60.9436									26.95	-57.251				26.95	-50.2624
27	-60.852									27	-57.1899				27	-50.1709
27.05	-60.8215									27.05	-57.1289				27.05	-49.9878
27.1	-60.73									27.1	-57.0679				27.1	-49.9878
27.15	-60.9436									27.15	-56.8848				27.15	-50.2624
27.2	-60.8215									27.2	-57.1289				27.2	-50.0793
27.25	-60.8826									27.25	-57.1594				27.25	-50.0183
27.3	-60.6079									27.3	-57.0679				27.3	-49.9878
27.35	-60.9131									27.35	-57.0373				27.35	-50.2624
27.4	-60.9436									27.4	-57.0068				27.4	-50.1404
27.45	-61.0046									27.45	-56.8848				27.45	-49.8962
27.5	-60.8215									27.5	-56.9153				27.5	-50.3235
27.55	-60.6995									27.55	-57.0679				27.55	-50.2014
27.6	-61.0046									27.6	-57.0373				27.6	-49.8352
27.65	-61.0657									27.65	-57.0068				27.65	-50.1709
27.7	-61.0046									27.7	-57.0373				27.7	-50.1709
27.75	-60.852									27.75	-56.8848				27.75	-49.9268
27.8	-60.8826									27.8	-56.7932				27.8	-50.2624
27.85	-61.1877									27.85	-56.8542				27.85	-50.0488
27.9	-61.0352									27.9	-57.0068				27.9	-49.9573
27.95	-61.0046									27.95	-57.0068				27.95	-50.1709
28	-60.852									28	-57.0373				28	-50.0793
28.05	-61.0352									28.05	-57.1289				28.05	-50.0488
28.1	-61.1572									28.1	-56.8237				28.1	-50.1709
28.15	-61.0352									28.15	-56.8542				28.15	-49.9268
28.2	-60.9741									28.2	-56.7932				28.2	-50.2014
28.25	-60.8826									28.25	-56.9458				28.25	-50.1099
28.3	-60.852									28.3	-57.0068				28.3	-49.8657
28.35	-61.1267									28.35	-57.0679				28.35	-50.2014
28.4	-61.0352									28.4	-56.9153				28.4	-50.1709
28.45	-61.1267									28.45	-57.0068				28.45	-49.8962
28.5	-60.9131									28.5	-56.8848				28.5	-50.1404
28.55	-60.791									28.55	-56.8848				28.55	-50.2014
28.6	-61.0962									28.6	-56.7322				28.6	-49.9878
28.65	-61.1572									28.65	-56.8542				28.65	-50.0488
28.7	-61.1267									28.7	-56.9153				28.7	-50.1709
28.75	-60.9436									28.75	-57.0068				28.75	-50.1404
28.8	-60.73									28.8	-56.9458				28.8	-49.9268
28.85	-60.9131									28.85	-56.9153				28.85	-50.2319
28.9	-61.1572									28.9	-56.9153				28.9	-50.1404
28.95	-61.0657									28.95	-56.8542				28.95	-49.9268
29	-60.9436									29	-56.7017				29	-50.1709
29.05	-60.9741									29.05	-56.9153				29.05	-50.1404
29.1	-60.791									29.1	-57.0373				29.1	-50.1099
29.15	-60.8826									29.15	-56.9458				29.15	-49.9878
29.2	-61.0657									29.2	-56.7932				29.2	-50.3235
29.25	-61.0962									29.25	-56.7627				29.25	-50.1709
29.3	-61.0046									29.3	-56.9763				29.3	-50.0488
29.35	-60.9436									29.35	-56.9153				29.35	-50.0793
29.4	-60.8215									29.4	-56.8542				29.4	-50.354
29.45	-60.8215									29.45	-56.9763				29.45	-50.1404
29.5	-61.0657									29.5	-57.0068				29.5	-49.9878
29.55	-61.0352									29.55	-56.9458				29.55	-50.2014
29.6	-60.9436									29.6	-56.8542				29.6	-50.354
29.65	-60.9741									29.65	-57.0679				29.65	-50.2014
29.7	-60.8826									29.7	-56.8848				29.7	-49.9268
29.75	-60.8215									29.75	-56.9763				29.75	-50.1709
29.8	-60.791									29.8	-57.0373				29.8	-50.354
29.85	-60.9741									29.85	-56.9153				29.85	-50.2319
29.9	-61.0352									29.9	-57.0984				29.9	-50.0488
29.95	-61.0657									29.95	-57.0679				29.95	-50.1709
30	-60.9741									30	-56.8542				30	-50.2624
30.05	-60.9131									30.05	-57.2205				30.05	-50.3845
30.1	-60.791									30.1	-57.0679				30.1	-50.0793
30.15	-60.7605									30.15	-57.0373				30.15	-50.1099
30.2	-60.852									30.2	-57.1899				30.2	-50.293
30.25	-61.0352									30.25	-57.0068				30.25	-50.293
30.3	-61.0046									30.3	-57.2205				30.3	-50.1099
30.35	-60.8826									30.35	-57.251				30.35	-50.0183
30.4	-60.9436									30.4	-57.0984				30.4	-50.3235
30.45	-60.8215									30.45	-57.3425				30.45	-50.2319
30.5	-60.791									30.5	-57.1899				30.5	-50.2319
30.55	-60.7605									30.55	-57.2815				30.55	-49.9573
30.6	-60.8215									30.6	-57.3425				30.6	-50.293
30.65	-60.9741									30.65	-57.1899				30.65	-50.293
30.7	-61.0352									30.7	-57.312				30.7	-50.293
30.75	-60.9436									30.75	-57.4341				30.75	-50.1404
30.8	-60.9436									30.8	-57.312				30.8	-50.2014
30.85	-61.0046									30.85	-57.4036				30.85	-50.354
30.9	-60.9436									30.9	-57.4646				30.9	-50.2624
30.95	-60.791									30.95	-57.4341				30.95	-50.2624
31	-60.73									31	-57.4951				31	-50.1099
31.05	-60.791									31.05	-57.5561				31.05	-50.2624
31.1	-61.0352									31.1	-57.4036				31.1	-50.293
31.15	-61.1267									31.15	-57.4036				31.15	-50.293
31.2	-61.0352									31.2	-57.6172				31.2	-50.2319
31.25	-60.9131									31.25	-57.4951				31.25	-50.0488
31.3	-61.0046									31.3	-57.2815				31.3	-50.1709
31.35	-60.9741									31.35	-57.6477				31.35	-50.293
31.4	-60.852									31.4	-57.6172				31.4	-50.1709
31.45	-60.852									31.45	-57.4646				31.45	-50.1099
31.5	-60.73									31.5	-57.4951				31.5	-49.8047
31.55	-60.852									31.55	-57.7087				31.55	-50.0488
31.6	-60.8826									31.6	-57.6477				31.6	-50.1709
31.65	-61.0657									31.65	-57.3425				31.65	-50.0793
31.7	-61.0962									31.7	-57.6172				31.7	-50.0183
31.75	-61.2183									31.75	-57.5867				31.75	-49.7436
31.8	-61.0046									31.8	-57.5256				31.8	-49.9268
31.85	-60.9741									31.85	-57.4341				31.85	-50.1099
31.9	-61.0046									31.9	-57.6477				31.9	-50.0488
31.95	-61.0352									31.95	-57.6477				31.95	-50.0183
32	-60.852									32	-57.4646				32	-49.8352
32.05	-60.9131									32.05	-57.5561				32.05	-49.8047
32.1	-61.1572									32.1	-57.6172				32.1	-50.0183
32.15	-61.0962									32.15	-57.6172				32.15	-50.0793
32.2	-61.0657									32.2	-57.4646				32.2	-49.9878
32.25	-60.8826									32.25	-57.7393				32.25	-49.9878
32.3	-60.8826									32.3	-57.6477				32.3	-49.8352
32.35	-61.2488									32.35	-57.6477				32.35	-49.8352
32.4	-61.0352									32.4	-57.6172				32.4	-50.1099
32.45	-60.9131									32.45	-57.9224				32.45	-50.1404
32.5	-60.9131									32.5	-57.7087				32.5	-50.0793
32.55	-61.1267									32.55	-57.6782				32.55	-50.0488
32.6	-61.0962									32.6	-57.7087				32.6	-49.8962
32.65	-60.73									32.65	-57.7698				32.65	-49.9573
32.7	-61.0962									32.7	-57.7393				32.7	-50.2319
32.75	-61.0962									32.75	-57.7698				32.75	-50.2319
32.8	-60.73									32.8	-57.7393				32.8	-50.1099
32.85	-61.0352									32.85	-57.8918				32.85	-50.2624
32.9	-61.0046									32.9	-57.8003				32.9	-50.0488
32.95	-60.73									32.95	-57.7087				32.95	-49.8962
33	-61.0962									33	-57.7393				33	-50.0183
33.05	-60.9131									33.05	-57.8918				33.05	-50.3235
33.1	-60.8215									33.1	-57.8613				33.1	-50.2624
33.15	-61.0046									33.15	-57.8308				33.15	-50.0488
33.2	-60.9436									33.2	-57.7393				33.2	-50.1099
33.25	-60.8215									33.25	-57.9224				33.25	-50.0183
33.3	-61.0046									33.3	-57.9224				33.3	-49.8352
33.35	-60.852									33.35	-57.8918				33.35	-49.8962
33.4	-60.9741									33.4	-57.7393				33.4	-50.0488
33.45	-60.9131									33.45	-57.9224				33.45	-50.1099
33.5	-60.791									33.5	-57.9834				33.5	-50.0183
33.55	-60.9741									33.55	-57.9529				33.55	-49.9573
33.6	-60.8826									33.6	-57.8918				33.6	-49.8047
33.65	-60.852									33.65	-57.8308				33.65	-49.7131
33.7	-60.852									33.7	-58.1665				33.7	-49.7131
33.75	-61.0046									33.75	-58.0444				33.75	-49.7436
33.8	-60.852									33.8	-58.0139				33.8	-49.7742
33.85	-60.6995									33.85	-57.7393				33.85	-49.7131
33.9	-60.9436									33.9	-57.9834				33.9	-49.6521
33.95	-60.9131									33.95	-58.0749				33.95	-49.6826
34	-60.6384									34	-58.136				34	-49.5605
34.05	-60.9131									34.05	-57.8918				34.05	-49.469
34.1	-60.8826									34.1	-57.8003				34.1	-49.2859
34.15	-60.9131									34.15	-58.1055				34.15	-49.469
34.2	-60.6689									34.2	-58.197				34.2	-49.4385
34.25	-60.9741									34.25	-58.0749				34.25	-49.4995
34.3	-60.8826									34.3	-57.9224				34.3	-49.469
34.35	-60.73									34.35	-57.8613				34.35	-49.4385
34.4	-60.73									34.4	-58.2275				34.4	-49.408
34.45	-60.9741									34.45	-58.136				34.45	-49.3469
34.5	-60.852									34.5	-58.1055				34.5	-49.2859
34.55	-60.6689									34.55	-58.0139				34.55	-49.1638
34.6	-60.8215									34.6	-57.9224				34.6	-49.1028
34.65	-60.9131									34.65	-57.9834				34.65	-49.2248
34.7	-60.8826									34.7	-58.0749				34.7	-49.2859
34.75	-60.6384									34.75	-57.9834				34.75	-49.3469
34.8	-60.8215									34.8	-57.9834				34.8	-49.3164
34.85	-60.8826									34.85	-57.7393				34.85	-49.1943
34.9	-60.8215									34.9	-57.8613				34.9	-49.2859
34.95	-60.6384									34.95	-58.1055				34.95	-49.1638
35	-60.8215									35	-58.1055				35	-49.0112
35.05	-60.852									35.05	-57.9224				35.05	-48.8892
35.1	-60.8215									35.1	-57.8613				35.1	-48.9197
35.15	-60.73									35.15	-57.7698				35.15	-49.0723
35.2	-60.73									35.2	-57.8918				35.2	-49.0112
35.25	-60.9131									35.25	-57.9834				35.25	-48.8892
35.3	-60.791									35.3	-57.8918				35.3	-48.9502
35.35	-60.791									35.35	-57.9834				35.35	-48.7366
35.4	-60.6689									35.4	-57.7698				35.4	-48.7976
35.45	-60.852									35.45	-57.6477				35.45	-48.9197
35.5	-60.8215									35.5	-57.8308				35.5	-48.8892
35.55	-60.8215									35.55	-57.9834				35.55	-48.8281
35.6	-60.5469									35.6	-57.9529				35.6	-48.7976
35.65	-60.73									35.65	-57.7698				35.65	-48.9807
35.7	-60.8215									35.7	-57.7087				35.7	-48.9502
35.75	-60.7605									35.75	-57.6782				35.75	-48.6755
35.8	-60.6689									35.8	-57.7087				35.8	-49.0723
35.85	-60.4858									35.85	-57.7698				35.85	-48.9502
35.9	-60.73									35.9	-57.8613				35.9	-48.7366
35.95	-60.8215									35.95	-57.7698				35.95	-49.0417
36	-60.7605									36	-57.7698				36	-48.9807
36.05	-60.5164									36.05	-57.6172				36.05	-48.7366
36.1	-60.5774									36.1	-57.4951				36.1	-49.0723
36.15	-60.8215									36.15	-57.7087				36.15	-49.0112
36.2	-60.6689									36.2	-57.8003				36.2	-48.8586
36.25	-60.73									36.25	-57.8308				36.25	-49.1638
36.3	-60.4553									36.3	-57.7698				36.3	-49.1028
36.35	-60.5774									36.35	-57.8003				36.35	-49.0112
36.4	-60.7605									36.4	-57.6172				36.4	-49.1638
36.45	-60.73									36.45	-57.4341				36.45	-49.1028
36.5	-60.6995									36.5	-57.4646				36.5	-49.1333
36.55	-60.5164									36.55	-57.6782				36.55	-49.3164
36.6	-60.5164									36.6	-57.7087				36.6	-49.1028
36.65	-60.8826									36.65	-57.7087				36.65	-49.3164
36.7	-60.73									36.7	-57.5867				36.7	-49.3164
36.75	-60.6995									36.75	-57.6172				36.75	-49.1943
36.8	-60.5164									36.8	-57.4646				36.8	-49.3469
36.85	-60.4858									36.85	-57.4341				36.85	-49.4995
36.9	-60.7605									36.9	-57.3425				36.9	-49.3164
36.95	-60.73									36.95	-57.5561				36.95	-49.3774
37	-60.73									37	-57.6477				37	-49.53
37.05	-60.6689									37.05	-57.5256				37.05	-49.408
37.1	-60.4553									37.1	-57.5867				37.1	-49.2248
37.15	-60.6079									37.15	-57.6172				37.15	-49.5605
37.2	-60.9131									37.2	-57.5256				37.2	-49.53
37.25	-60.6995									37.25	-57.4036				37.25	-49.2248
37.3	-60.791									37.3	-57.251				37.3	-49.408
37.35	-60.6689									37.35	-57.5256				37.35	-49.5605
37.4	-60.5774									37.4	-57.5867				37.4	-49.4995
37.45	-60.73									37.45	-57.4646				37.45	-49.1638
37.5	-60.8826									37.5	-57.4341				37.5	-49.5605
37.55	-60.8215									37.55	-57.2815				37.55	-49.53
37.6	-60.9131									37.6	-57.4646				37.6	-49.4995
37.65	-60.6995									37.65	-57.4646				37.65	-49.3164
37.7	-60.5774									37.7	-57.4036				37.7	-49.53
37.75	-60.73									37.75	-57.312				37.75	-49.5605
37.8	-61.0046									37.8	-57.5867				37.8	-49.408
37.85	-60.9436									37.85	-57.4646				37.85	-49.4995
37.9	-60.8826									37.9	-57.0984				37.9	-49.6826
37.95	-60.852									37.95	-57.5561				37.95	-49.6216
38	-60.8215									38	-57.4036				38	-49.3774
38.05	-60.6384									38.05	-57.251				38.05	-49.5605
38.1	-60.8826									38.1	-57.4646				38.1	-49.7436
38.15	-60.9741									38.15	-57.4646				38.15	-49.6826
38.2	-61.0352									38.2	-57.2205				38.2	-49.53
38.25	-61.0657									38.25	-57.4646				38.25	-49.6216
38.3	-60.9131									38.3	-57.2815				38.3	-49.8657
38.35	-60.7605									38.35	-57.4646				38.35	-49.7131
38.4	-60.8215									38.4	-57.3425				38.4	-49.6826
38.45	-60.9741									38.45	-57.1594				38.45	-49.5911
38.5	-60.9741									38.5	-57.4646				38.5	-49.9268
38.55	-61.0657									38.55	-57.373				38.55	-49.8047
38.6	-61.0046									38.6	-57.251				38.6	-49.8352
38.65	-61.1267									38.65	-57.373				38.65	-49.6216
38.7	-60.8826									38.7	-57.2205				38.7	-49.8657
38.75	-60.7605									38.75	-57.5256				38.75	-49.8352
38.8	-60.8215									38.8	-57.3425				38.8	-49.8962
38.85	-60.9131									38.85	-57.0373				38.85	-49.6216
38.9	-60.9741									38.9	-57.4646				38.9	-49.8352
38.95	-61.0046									38.95	-57.4341				38.95	-49.9268
39	-61.0352									39	-57.1899				39	-49.8962
39.05	-61.0657									39.05	-57.4036				39.05	-49.8047
39.1	-60.8215									39.1	-57.2815				39.1	-49.6216
39.15	-60.791									39.15	-57.1594				39.15	-49.8962
39.2	-61.0046									39.2	-57.4341				39.2	-49.9268
39.25	-61.1572									39.25	-57.373				39.25	-49.9573
39.3	-61.0352									39.3	-57.1594				39.3	-49.53
39.35	-61.0046									39.35	-57.4341				39.35	-49.7436
39.4	-60.9131									39.4	-57.2815				39.4	-50.0183
39.45	-60.852									39.45	-57.1289				39.45	-49.9878
39.5	-60.8826									39.5	-57.312				39.5	-49.8657
39.55	-61.0046									39.55	-57.3425				39.55	-49.6521
39.6	-61.1267									39.6	-57.2205				39.6	-49.8657
39.65	-60.9741									39.65	-57.2815				39.65	-49.9878
39.7	-61.0352									39.7	-57.2815				39.7	-49.9268
39.75	-60.852									39.75	-57.2815				39.75	-49.8047
39.8	-60.791									39.8	-57.0984				39.8	-49.6826
39.85	-61.0352									39.85	-57.3425				39.85	-49.7131
39.9	-61.0962									39.9	-57.2815				39.9	-49.9573
39.95	-61.0046									39.95	-57.1594				39.95	-49.8352
40	-60.9741									40	-57.1899				40	-49.9268
40.05	-61.0046									40.05	-57.2205				40.05	-49.7131
40.1	-60.9436									40.1	-57.1594				40.1	-49.7436
40.15	-60.7605									40.15	-56.9458				40.15	-49.9878
40.2	-60.8826									40.2	-57.2815				40.2	-49.9268
40.25	-61.0657									40.25	-57.1289				40.25	-49.9573
40.3	-61.0657									40.3	-56.9458				40.3	-49.8657
40.35	-61.0352									40.35	-57.0068				40.35	-49.6521
40.4	-60.9741									40.4	-57.2205				40.4	-49.8657
40.45	-60.8215									40.45	-57.0679				40.45	-50.0793
40.5	-60.9741									40.5	-56.8542				40.5	-49.9573
40.55	-61.0352									40.55	-57.0068				40.55	-50.0183
40.6	-60.8826									40.6	-57.0984				40.6	-49.8657
40.65	-60.791									40.65	-57.0984				40.65	-49.8962
40.7	-61.0352									40.7	-56.7322				40.7	-50.1404
40.75	-60.9741									40.75	-57.0679				40.75	-50.1404
40.8	-60.791									40.8	-56.9763				40.8	-50.0793
40.85	-61.0046									40.85	-56.9153				40.85	-50.1709
40.9	-61.0046									40.9	-56.6711				40.9	-50.0488
40.95	-60.8215									40.95	-57.0984				40.95	-49.8962
41	-61.0962									41	-56.9763				41	-50.0793
41.05	-61.0962									41.05	-56.8848				41.05	-50.293
41.1	-60.73									41.1	-56.6406				41.1	-50.2319
41.15	-61.1572									41.15	-56.9763				41.15	-50.2014
41.2	-61.0657									41.2	-56.9763				41.2	-50.1099
41.25	-60.9741									41.25	-56.8848				41.25	-49.9878
41.3	-61.1572									41.3	-56.6406				41.3	-50.0488
41.35	-60.9131									41.35	-56.9153				41.35	-50.0793
41.4	-61.0657									41.4	-56.9763				41.4	-50.2319
41.45	-61.1267									41.45	-56.8848				41.45	-50.2014
41.5	-60.852									41.5	-56.6406				41.5	-50.2319
41.55	-61.1877									41.55	-56.8542				41.55	-50.1404
41.6	-60.9741									41.6	-56.9458				41.6	-49.9268
41.65	-61.0352									41.65	-56.8542				41.65	-49.9878
41.7	-61.0962									41.7	-56.7017				41.7	-50.1709
41.75	-60.9131									41.75	-56.6101				41.75	-50.3235
41.8	-61.1267									41.8	-56.9458				41.8	-50.2319
41.85	-61.1572									41.85	-56.7932				41.85	-50.2014
41.9	-60.852									41.9	-56.8237				41.9	-50.2319
41.95	-61.1267									41.95	-56.5796				41.95	-50.2319
42	-61.0962									42	-56.9763				42	-50.0488
42.05	-60.8826									42.05	-56.8542				42.05	-50.1404
42.1	-61.2488									42.1	-56.8237				42.1	-50.354
42.15	-61.0046									42.15	-56.6711				42.15	-50.4761
42.2	-60.852									42.2	-56.7322				42.2	-50.415
42.25	-61.1572									42.25	-56.8848				42.25	-50.354
42.3	-61.1572									42.3	-56.8237				42.3	-50.5066
42.35	-60.73									42.35	-56.8542				42.35	-50.3845
42.4	-61.0962									42.4	-56.6406				42.4	-50.2319
42.45	-61.0352									42.45	-56.6711				42.45	-50.2014
42.5	-60.8826									42.5	-56.9458				42.5	-50.4761
42.55	-61.0352									42.55	-56.8237				42.55	-50.5371
42.6	-61.0657									42.6	-56.8237				42.6	-50.6897
42.65	-61.0046									42.65	-56.6711				42.65	-50.6287
42.7	-60.9741									42.7	-56.6406				42.7	-50.6897
42.75	-61.1572									42.75	-56.8237				42.75	-50.6592
42.8	-61.0657									42.8	-56.8542				42.8	-50.5676
42.85	-60.7605									42.85	-56.7322				42.85	-50.5676
42.9	-61.1267									42.9	-56.5796				42.9	-50.5066
42.95	-61.0352									42.95	-56.5796				42.95	-50.4761
43	-60.852									43	-56.8848				43	-50.5371
43.05	-61.0046									43.05	-56.7627				43.05	-50.7507
43.1	-61.0962									43.1	-56.7017				43.1	-50.8728
43.15	-61.0962									43.15	-56.6711				43.15	-50.9033
43.2	-60.8215									43.2	-56.488				43.2	-50.7202
43.25	-61.1267									43.25	-56.7017				43.25	-50.7507
43.3	-61.0046									43.3	-56.7932				43.3	-50.7812
43.35	-61.0046									43.35	-56.6711				43.35	-50.7812
43.4	-60.852									43.4	-56.6711				43.4	-50.6592
43.45	-61.1877									43.45	-56.4575				43.45	-50.5981
43.5	-61.1267									43.5	-56.488				43.5	-50.7812
43.55	-60.9741									43.55	-56.7322				43.55	-50.9644
43.6	-60.9741									43.6	-56.7017				43.6	-50.8118
43.65	-61.0657									43.65	-56.5186				43.65	-50.7812
43.7	-61.0962									43.7	-56.5796				43.7	-50.6592
43.75	-60.791									43.75	-56.427				43.75	-50.8118
43.8	-61.0352									43.8	-56.366				43.8	-50.9949
43.85	-61.0352									43.85	-56.5491				43.85	-50.8728
43.9	-61.0962									43.9	-56.6406				43.9	-50.7507
43.95	-60.791									43.95	-56.5491				43.95	-50.8118
44	-61.1267									44	-56.5491				44	-51.0559
44.05	-61.0657									44.05	-56.427				44.05	-50.9033
44.1	-61.0657									44.1	-56.3354				44.1	-50.7812
44.15	-60.791									44.15	-56.5186				44.15	-51.1475
44.2	-61.0962									44.2	-56.7017				44.2	-51.0559
44.25	-61.0962									44.25	-56.5491				44.25	-50.8728
44.3	-61.1267									44.3	-56.5186				44.3	-51.1475
44.35	-60.852									44.35	-56.5796				44.35	-51.1475
44.4	-61.0046									44.4	-56.427				44.4	-50.9338
44.45	-61.1572									44.45	-56.427				44.45	-51.178
44.5	-61.1572									44.5	-56.5186				44.5	-51.0559
44.55	-60.8215									44.55	-56.7017				44.55	-51.0559
44.6	-60.9436									44.6	-56.6101				44.6	-51.178
44.65	-61.0962									44.65	-56.5796				44.65	-51.1475
44.7	-61.0962									44.7	-56.6406				44.7	-51.0864
44.75	-60.9741									44.75	-56.5796				44.75	-51.2085
44.8	-60.8215									44.8	-56.3965				44.8	-50.9644
44.85	-61.0962									44.85	-56.427				44.85	-51.239
44.9	-61.0962									44.9	-56.6406				44.9	-51.2085
44.95	-61.1267									44.95	-56.7627				44.95	-51.0254
45	-60.6995									45	-56.6711				45	-51.3306
45.05	-61.0352									45.05	-56.6101				45.05	-51.239
45.1	-61.1267									45.1	-56.7322				45.1	-50.9644
45.15	-61.1267									45.15	-56.6711				45.15	-51.3306
45.2	-60.8826									45.2	-56.5186				45.2	-51.3306
45.25	-60.7605									45.25	-56.4575				45.25	-51.0864
45.3	-61.0962									45.3	-56.7017				45.3	-51.2695
45.35	-61.1267									45.35	-56.8542				45.35	-51.3
45.4	-60.9131									45.4	-56.7627				45.4	-51.3
45.45	-60.791									45.45	-56.7932				45.45	-51.0559
45.5	-60.8826									45.5	-56.7322				45.5	-51.2695
45.55	-61.1877									45.55	-56.7932				45.55	-51.3306
45.6	-60.9436									45.6	-56.6406				45.6	-51.0559
45.65	-60.9131									45.65	-56.5796				45.65	-51.239
45.7	-60.791									45.7	-56.8542				45.7	-51.2085
45.75	-60.8215									45.75	-57.0068				45.75	-51.178
45.8	-60.9436									45.8	-56.7627				45.8	-50.9644
45.85	-60.9436									45.85	-56.7322				45.85	-51.3306
45.9	-60.9131									45.9	-56.7017				45.9	-51.1475
45.95	-60.8826									45.95	-57.0373				45.95	-51.0254
46	-60.7605									46	-56.7932				46	-51.0254
46.05	-60.9131									46.05	-56.6711				46.05	-51.3306
46.1	-60.9436									46.1	-56.8237				46.1	-51.2085
46.15	-60.9741									46.15	-57.0068				46.15	-50.9949
46.2	-60.852									46.2	-56.7627				46.2	-51.0559
46.25	-60.6689									46.25	-56.7017				46.25	-51.239
46.3	-60.852									46.3	-57.0068				46.3	-51.2085
46.35	-60.9741									46.35	-56.9458				46.35	-50.9644
46.4	-60.9436									46.4	-56.7627				46.4	-51.1475
46.45	-60.9131									46.45	-56.9763				46.45	-51.2695
46.5	-60.6995									46.5	-56.8542				46.5	-51.239
46.55	-60.73									46.55	-57.0068				46.55	-50.9644
46.6	-61.0046									46.6	-56.9153				46.6	-51.1169
46.65	-60.9436									46.65	-56.7322				46.65	-51.2695
46.7	-60.8826									46.7	-57.0984				46.7	-51.239
46.75	-60.852									46.75	-57.0373				46.75	-51.0559
46.8	-60.6995									46.8	-56.7932				46.8	-51.1169
46.85	-60.6995									46.85	-57.0068				46.85	-51.3306
46.9	-60.8826									46.9	-56.9153				46.9	-51.178
46.95	-60.9741									46.95	-57.0984				46.95	-51.0864
47	-60.8215									47	-57.0068				47	-51.0254
47.05	-60.852									47.05	-56.7932				47.05	-51.3
47.1	-60.791									47.1	-57.1289				47.1	-51.2085
47.15	-60.73									47.15	-57.0679				47.15	-51.2085
47.2	-60.852									47.2	-56.8848				47.2	-51.0254
47.25	-61.0046									47.25	-57.0679				47.25	-51.2695
47.3	-60.8826									47.3	-57.0068				47.3	-51.239
47.35	-61.0046									47.35	-57.1289				47.35	-51.178
47.4	-60.8215									47.4	-57.1899				47.4	-51.0864
47.45	-60.73									47.45	-57.1289				47.45	-50.9338
47.5	-60.6995									47.5	-57.0984				47.5	-51.239
47.55	-61.0046									47.55	-57.2205				47.55	-51.2085
47.6	-61.0657									47.6	-57.0068				47.6	-51.1169
47.65	-61.0352									47.65	-57.0679				47.65	-50.9033
47.7	-61.0352									47.7	-57.251				47.7	-50.9033
47.75	-61.0962									47.75	-57.1899				47.75	-51.1169
47.8	-60.8826									47.8	-56.9458				47.8	-51.0254
47.85	-60.73									47.85	-57.312				47.85	-50.9949
47.9	-60.9741									47.9	-57.251				47.9	-50.7507
47.95	-61.1267									47.95	-57.0068				47.95	-50.9338
48	-61.0962									48	-57.251				48	-51.0864
48.05	-61.0352									48.05	-57.1899				48.05	-50.9338
48.1	-61.0046									48.1	-57.1594				48.1	-51.0254
48.15	-61.0962									48.15	-57.1899				48.15	-50.7812
48.2	-60.9436									48.2	-57.2815				48.2	-50.8728
48.25	-60.6689									48.25	-57.2815				48.25	-51.0559
48.3	-60.8826									48.3	-57.1289				48.3	-50.9644
48.35	-61.0352									48.35	-57.4646				48.35	-50.9338
48.4	-61.1572									48.4	-57.251				48.4	-50.8118
48.45	-60.9741									48.45	-57.251				48.45	-50.8728
48.5	-61.0046									48.5	-57.2815				48.5	-50.9949
48.55	-61.0962									48.55	-57.4951				48.55	-50.9338
48.6	-60.8826									48.6	-57.373				48.6	-50.9338
48.65	-60.73									48.65	-57.1899				48.65	-50.9338
48.7	-61.0046									48.7	-57.5256				48.7	-50.5981
48.75	-61.1267									48.75	-57.5867				48.75	-50.8728
48.8	-61.1572									48.8	-57.4341				48.8	-50.9949
48.85	-60.9436									48.85	-57.312				48.85	-50.9644
48.9	-60.8215									48.9	-57.6782				48.9	-50.9338
48.95	-61.1877									48.95	-57.6172				48.95	-50.7812
49	-61.0657									49	-57.4036				49	-50.6287
49.05	-60.8215									49.05	-57.4646				49.05	-50.9033
49.1	-60.9741									49.1	-57.7393				49.1	-51.0559
49.15	-61.0962									49.15	-57.7087				49.15	-50.9033
49.2	-60.9741									49.2	-57.4646				49.2	-50.9644
49.25	-60.852									49.25	-57.4646				49.25	-50.8728
49.3	-61.0352									49.3	-57.7698				49.3	-50.7812
49.35	-60.9436									49.35	-57.7087				49.35	-50.7812
49.4	-61.0352									49.4	-57.4951				49.4	-50.8728
49.45	-61.0657									49.45	-57.5561				49.45	-50.9033
49.5	-60.791									49.5	-57.8003				49.5	-50.8728
49.55	-61.0962									49.55	-57.7393				49.55	-50.8118
49.6	-61.0657									49.6	-57.5256				49.6	-50.5371
49.65	-60.791									49.65	-57.4951				49.65	-50.5371
49.7	-60.9741									49.7	-57.8613				49.7	-50.6592
49.75	-60.9131									49.75	-57.7087				49.75	-50.8118
49.8	-61.0046									49.8	-57.5867				49.8	-50.6897
49.85	-61.0046									49.85	-57.4646				49.85	-50.6287
49.9	-60.6689									49.9	-57.8918				49.9	-50.6287
49.95	-61.0046									49.95	-57.7087				49.95	-50.4761
50	-60.8826									50	-57.6782				50	-50.2319
50.05	-60.852									50.05	-57.4646				50.05	-50.4456
50.1	-60.9131									50.1	-57.8308				50.1	-50.5371
50.15	-60.7605									50.15	-57.8003				50.15	-50.5371
50.2	-60.9436									50.2	-57.7087				50.2	-50.4456
50.25	-61.0046									50.25	-57.5561				50.25	-50.4761
50.3	-60.73									50.3	-57.6782				50.3	-50.3845
50.35	-61.0046									50.35	-57.8918				50.35	-50.2624
50.4	-60.9436									50.4	-57.7087				50.4	-50.1709
50.45	-60.6689									50.45	-57.6782				50.45	-50.3235
50.5	-60.9436									50.5	-57.6477				50.5	-50.5371
50.55	-60.9131									50.55	-57.7698				50.55	-50.4761
50.6	-60.6689									50.6	-57.8918				50.6	-50.354
50.65	-60.9741									50.65	-57.7698				50.65	-50.415
50.7	-60.9741									50.7	-57.7087				50.7	-50.354
50.75	-60.6995									50.75	-57.5256				50.75	-50.2319
50.8	-61.0046									50.8	-57.8308				50.8	-50.2014
50.85	-60.9436									50.85	-57.8308				50.85	-50.2014
50.9	-60.8215									50.9	-57.8613				50.9	-50.415
50.95	-60.791									50.95	-57.6782				50.95	-50.4456
51	-61.0962									51	-57.6172				51	-50.415
51.05	-60.9436									51.05	-57.8613				51.05	-50.293
51.1	-60.6689									51.1	-57.9529				51.1	-50.415
51.15	-61.0046									51.15	-57.8003				51.15	-50.4761
51.2	-60.9741									51.2	-57.7393				51.2	-50.293
51.25	-60.6689									51.25	-57.5867				51.25	-50.2319
51.3	-60.8215									51.3	-57.8613				51.3	-50.2319
51.35	-60.9741									51.35	-57.8613				51.35	-50.2624
51.4	-60.9131									51.4	-57.7393				51.4	-50.3235
51.45	-60.6995									51.45	-57.7087				51.45	-50.4761
51.5	-61.0046									51.5	-57.6477				51.5	-50.5676
51.55	-60.9436									51.55	-57.6782				51.55	-50.5371
51.6	-60.8215									51.6	-57.9224				51.6	-50.3845
51.65	-60.852									51.65	-57.8613				51.65	-50.3845
51.7	-60.9436									51.7	-57.9224				51.7	-50.3845
51.75	-60.852									51.75	-57.7393				51.75	-50.3235
51.8	-60.6384									51.8	-57.6172				51.8	-50.2319
51.85	-61.0657									51.85	-57.7393				51.85	-50.354
51.9	-60.8215									51.9	-57.9529				51.9	-50.5371
51.95	-60.791									51.95	-57.8003				51.95	-50.4761
52	-60.73									52	-57.8003				52	-50.4761
52.05	-61.0352									52.05	-57.7698				52.05	-50.1709
52.1	-60.9436									52.1	-57.6477				52.1	-50.2319
52.15	-60.73									52.15	-57.7698				52.15	-50.5066
52.2	-60.73									52.2	-57.9224				52.2	-50.4761
52.25	-61.0962									52.25	-57.8308				52.25	-50.2319
52.3	-60.8826									52.3	-57.8613				52.3	-50.415
52.35	-60.6995									52.35	-57.6172				52.35	-50.4761
52.4	-60.7605									52.4	-57.5561				52.4	-50.354
52.45	-61.0352									52.45	-57.7087				52.45	-50.2319
52.5	-60.852									52.5	-57.9224				52.5	-50.4456
52.55	-60.6689									52.55	-57.8613				52.55	-50.4761
52.6	-60.6995									52.6	-57.7698				52.6	-50.2319
52.65	-60.9436									52.65	-57.7087				52.65	-50.5371
52.7	-60.9131									52.7	-57.7698				52.7	-50.354
52.75	-60.6384									52.75	-57.5561				52.75	-50.354
52.8	-60.6689									52.8	-57.7393				52.8	-50.4761
52.85	-60.9741									52.85	-57.8308				52.85	-50.2319
52.9	-60.791									52.9	-57.9224				52.9	-50.3235
52.95	-60.6384									52.95	-57.7393				52.95	-50.4456
53	-60.5774									53	-57.8003				53	-50.2319
53.05	-60.9131									53.05	-57.7087				53.05	-50.354
53.1	-60.8215									53.1	-57.6172				53.1	-50.3845
53.15	-60.6384									53.15	-57.5867				53.15	-50.1404
53.2	-60.5164									53.2	-57.8308				53.2	-50.5066
53.25	-60.791									53.25	-57.8613				53.25	-50.3235
53.3	-60.852									53.3	-57.8613				53.3	-50.1404
53.35	-60.7605									53.35	-57.7393				53.35	-50.4761
53.4	-60.5774									53.4	-57.7698				53.4	-50.4456
53.45	-60.6689									53.45	-57.5867				53.45	-50.0793
53.5	-60.852									53.5	-57.5256				53.5	-50.3845
53.55	-60.6689									53.55	-57.4951				53.55	-50.3845
53.6	-60.6689									53.6	-57.6477				53.6	-50.2319
53.65	-60.4553									53.65	-57.7393				53.65	-50.354
53.7	-60.6995									53.7	-57.7393				53.7	-50.3845
53.75	-60.7605									53.75	-57.6172				53.75	-50.2319
53.8	-60.73									53.8	-57.6782				53.8	-50.0793
53.85	-60.6689									53.85	-57.5867				53.85	-50.4456
53.9	-60.4858									53.9	-57.4951				53.9	-50.354
53.95	-60.6995									53.95	-57.4646				53.95	-50.0488
54	-60.6995									54	-57.6172				54	-50.293
54.05	-60.73									54.05	-57.7087				54.05	-50.4456
54.1	-60.6079									54.1	-57.5867				54.1	-50.2624
54.15	-60.4248									54.15	-57.5256				54.15	-50.0793
54.2	-60.73									54.2	-57.2815				54.2	-50.4456
54.25	-60.852									54.25	-57.5256				54.25	-50.3845
54.3	-60.6995									54.3	-57.5256				54.3	-50.2624
54.35	-60.6689									54.35	-57.4951				54.35	-50.2319
54.4	-60.4248									54.4	-57.251				54.4	-50.5676
54.45	-60.791									54.45	-57.4951				54.45	-50.3845
54.5	-60.852									54.5	-57.5256				54.5	-50.354
54.55	-60.73									54.55	-57.373				54.55	-50.3235
54.6	-60.73									54.6	-57.5867				54.6	-50.5981
54.65	-60.6995									54.65	-57.4341				54.65	-50.4761
54.7	-60.6689									54.7	-57.2815				54.7	-50.3235
54.75	-60.8215									54.75	-57.5867				54.75	-50.293
54.8	-60.791									54.8	-57.4646				54.8	-50.6287
54.85	-60.852									54.85	-57.1899				54.85	-50.4456
54.9	-60.6689									54.9	-57.5256				54.9	-50.293
54.95	-60.5469									54.95	-57.4341				54.95	-50.3235
55	-60.7605									55	-57.373				55	-50.5676
55.05	-60.9436									55.05	-57.4951				55.05	-50.5676
55.1	-60.852									55.1	-57.2205				55.1	-50.3845
55.15	-60.791									55.15	-57.4951				55.15	-50.1709
55.2	-60.6689									55.2	-57.4036				55.2	-50.5981
55.25	-60.5469									55.25	-57.2815				55.25	-50.5981
55.3	-60.852									55.3	-57.4646				55.3	-50.3845
55.35	-60.852									55.35	-57.373				55.35	-50.1709
55.4	-60.8826									55.4	-57.373				55.4	-50.415
55.45	-60.8215									55.45	-57.4036				55.45	-50.4456
55.5	-60.791									55.5	-57.1594				55.5	-50.4456
55.55	-60.5469									55.55	-57.5256				55.55	-50.2319
55.6	-60.6384									55.6	-57.4036				55.6	-50.2319
55.65	-60.8826									55.65	-57.2205				55.65	-50.4761
55.7	-61.0046									55.7	-57.5561				55.7	-50.3845
55.75	-60.791									55.75	-57.4036				55.75	-50.2624
55.8	-60.8215									55.8	-57.1289				55.8	-50.1709
55.85	-60.7605									55.85	-57.5256				55.85	-50.293
55.9	-60.5774									55.9	-57.4036				55.9	-50.4761
55.95	-60.6079									55.95	-57.251				55.95	-50.3235
56	-60.7605									56	-57.4951				56	-50.2624
56.05	-60.9436									56.05	-57.4341				56.05	-50.1099
56.1	-60.8215									56.1	-57.2815				56.1	-50.3845
56.15	-60.8826									56.15	-57.4951				56.15	-50.354
56.2	-60.73									56.2	-57.4036				56.2	-50.2624
56.25	-60.6079									56.25	-57.4036				56.25	-50.2319
56.3	-60.6079									56.3	-57.3425				56.3	-50.1099
56.35	-60.8826									56.35	-57.5256				56.35	-50.4456
56.4	-60.852									56.4	-57.4036				56.4	-50.415
56.45	-60.852									56.45	-57.312				56.45	-50.415
56.5	-60.8215									56.5	-57.6172				56.5	-50.3235
56.55	-60.791									56.55	-57.5561				56.55	-50.1099
56.6	-60.6995									56.6	-57.4036				56.6	-50.3845
56.65	-60.5774									56.65	-57.6172				56.65	-50.5676
56.7	-60.5469									56.7	-57.5867				56.7	-50.4761
56.75	-60.7605									56.75	-57.6172				56.75	-50.3235
56.8	-60.852									56.8	-57.373				56.8	-50.1404
56.85	-60.8826									56.85	-57.7393				56.85	-50.354
56.9	-60.852									56.9	-57.7087				56.9	-50.5676
56.95	-60.8826									56.95	-57.5867				56.95	-50.5066
57	-60.791									57	-57.4951				57	-50.4761
57.05	-60.5774									57.05	-57.8308				57.05	-50.415
57.1	-60.8826									57.1	-57.7393				57.1	-50.354
57.15	-60.791									57.15	-57.5256				57.15	-50.5371
57.2	-60.8826									57.2	-57.6782				57.2	-50.6287
57.25	-60.5774									57.25	-57.8613				57.25	-50.5066
57.3	-60.8215									57.3	-57.7393				57.3	-50.5371
57.35	-60.8215									57.35	-57.5561				57.35	-50.354
57.4	-60.791									57.4	-57.7393				57.4	-50.2319
57.45	-60.6079									57.45	-57.8613				57.45	-50.5066
57.5	-60.8826									57.5	-57.8003				57.5	-50.6287
57.55	-60.73									57.55	-57.5256				57.55	-50.4761
57.6	-60.6079									57.6	-57.8918				57.6	-50.4456
57.65	-60.8826									57.65	-57.8918				57.65	-50.3845
57.7	-60.852									57.7	-57.7698				57.7	-50.2624
57.75	-60.5164									57.75	-57.5256				57.75	-50.4456
57.8	-60.852									57.8	-57.8308				57.8	-50.5371
57.85	-60.6689									57.85	-57.8308				57.85	-50.5066
57.9	-60.73									57.9	-57.8003				57.9	-50.5066
57.95	-60.8215									57.95	-57.6172				57.95	-50.5066
58	-60.5164									58	-57.8003				58	-50.2319
58.05	-60.791									58.05	-57.8308				58.05	-50.2319
58.1	-60.8826									58.1	-57.8613				58.1	-50.4761
58.15	-60.5469									58.15	-57.5561				58.15	-50.5981
58.2	-60.791									58.2	-57.6782				58.2	-50.5371
58.25	-60.6689									58.25	-57.8918				58.25	-50.5066
58.3	-60.852									58.3	-57.8918				58.3	-50.4761
58.35	-60.8215									58.35	-57.6172				58.35	-50.415
58.4	-60.4553									58.4	-57.5867				58.4	-50.3235
58.45	-60.8215									58.45	-57.9224				58.45	-50.5371
58.5	-60.7605									58.5	-57.8918				58.5	-50.7202
58.55	-60.6079									58.55	-57.7087				58.55	-50.6897
58.6	-60.791									58.6	-57.4951				58.6	-50.5981
58.65	-60.7605									58.65	-57.8003				58.65	-50.5676
58.7	-60.6689									58.7	-57.8918				58.7	-50.5676
58.75	-60.9436									58.75	-57.8613				58.75	-50.5371
58.8	-60.73									58.8	-57.6477				58.8	-50.4456
58.85	-60.5774									58.85	-57.6477				58.85	-50.4456
58.9	-60.852									58.9	-57.9224				58.9	-50.6897
58.95	-60.791									58.95	-57.8003				58.95	-50.7507
59	-60.5164									59	-57.7393				59	-50.6897
59.05	-60.791									59.05	-57.6782				59.05	-50.5676
59.1	-60.7605									59.1	-57.8003				59.1	-50.6897
59.15	-60.5469									59.15	-57.8918				59.15	-50.5981
59.2	-60.791									59.2	-57.7393				59.2	-50.354
59.25	-60.6995									59.25	-57.7087				59.25	-50.2624
59.3	-60.5774									59.3	-57.5256				59.3	-50.415
59.35	-60.6995									59.35	-57.6782				59.35	-50.5371
59.4	-60.73									59.4	-57.7698				59.4	-50.5371
59.45	-60.6079									59.45	-57.7698				59.45	-50.5371
59.5	-60.5469									59.5	-57.8003				59.5	-50.4456
59.55	-60.791									59.55	-57.5256				59.55	-50.5371
59.6	-60.73									59.6	-57.5561				59.6	-50.415
59.65	-60.3943									59.65	-57.8003				59.65	-50.3845
59.7	-60.73									59.7	-57.7393				59.7	-50.2624
59.75	-60.73									59.75	-57.6477				59.75	-50.1404
59.8	-60.6384									59.8	-57.5561				59.8	-50.2014
59.85	-60.4553									59.85	-57.5561				59.85	-50.2014
59.9	-60.791									59.9	-57.7393				59.9	-50.415
59.95	-60.6995									59.95	-57.7393				59.95	-50.415
60	-60.6384									60	-57.6172				60	-50.4456
60.05	-60.6079									60.05	-57.6782				60.05	-50.293
60.1	-60.7605									60.1	-57.5867				60.1	-50.354
60.15	-60.73									60.15	-57.5256				60.15	-50.2624
60.2	-60.4858									60.2	-57.7698				60.2	-50.2014
60.25	-60.791									60.25	-57.8003				60.25	-50.2624
60.3	-60.7605									60.3	-57.7698				60.3	-50.415
60.35	-60.6384									60.35	-57.6477				60.35	-50.415
60.4	-60.5774									60.4	-57.4951				60.4	-50.3235
60.45	-60.7605									60.45	-57.5561				60.45	-50.1099
60.5	-60.7605									60.5	-57.8308				60.5	-50.3845
60.55	-60.73									60.55	-57.7087				60.55	-50.4761
60.6	-60.5164									60.6	-57.6782				60.6	-50.2624
60.65	-60.8215									60.65	-57.6782				60.65	-50.1709
60.7	-60.6995									60.7	-57.6477				60.7	-50.4761
60.75	-60.7605									60.75	-57.4646				60.75	-50.415
60.8	-60.5469									60.8	-57.6782				60.8	-50.1099
60.85	-60.852									60.85	-57.8003				60.85	-50.3845
60.9	-60.8215									60.9	-57.7393				60.9	-50.415
60.95	-60.8826									60.95	-57.6782				60.95	-50.1709
61	-60.4858									61	-57.6782				61	-50.5981
61.05	-60.9131									61.05	-57.5867				61.05	-50.3235
61.1	-60.8215									61.1	-57.5561				61.1	-49.9878
61.15	-60.9436									61.15	-57.7087				61.15	-50.3845
61.2	-60.6689									61.2	-57.8308				61.2	-50.415
61.25	-60.852									61.25	-57.8613				61.25	-50.0488
61.3	-60.9741									61.3	-57.8003				61.3	-50.3235
61.35	-60.9436									61.35	-57.7393				61.35	-50.293
61.4	-60.73									61.4	-57.7087				61.4	-50.2014
61.45	-60.8215									61.45	-57.6172				61.45	-50.3845
61.5	-61.0657									61.5	-57.7698				61.5	-50.1709
61.55	-60.9436									61.55	-57.8918				61.55	-50.3235
61.6	-60.8826									61.6	-57.9224				61.6	-50.293
61.65	-60.6384									61.65	-57.9224				61.65	-50.2319
61.7	-61.0046									61.7	-57.9834				61.7	-50.2624
61.75	-61.0352									61.75	-57.8308				61.75	-50.293
61.8	-61.0657									61.8	-57.8003				61.8	-50.2319
61.85	-60.8215									61.85	-57.6477				61.85	-50.2319
61.9	-60.791									61.9	-57.7393				61.9	-50.2319
61.95	-61.0962									61.95	-57.8308				61.95	-50.1709
62	-61.0352									62	-57.9834				62	-50.0488
62.05	-60.8826									62.05	-57.9834				62.05	-50.2624
62.1	-60.7605									62.1	-57.9224				62.1	-50.2319
62.15	-60.9741									62.15	-57.9529				62.15	-49.9268
62.2	-61.1572									62.2	-57.8003				62.2	-50.2624
62.25	-60.9131									62.25	-57.7393				62.25	-50.0793
62.3	-60.852									62.3	-57.8308				62.3	-50.1099
62.35	-60.73									62.35	-57.9834				62.35	-49.9573
62.4	-60.9131									62.4	-57.8918				62.4	-50.3235
62.45	-61.0046									62.45	-57.9529				62.45	-50.2014
62.5	-60.8826									62.5	-57.8613				62.5	-49.9268
62.55	-60.9131									62.55	-57.7087				62.55	-50.1099
62.6	-60.73									62.6	-57.9224				62.6	-50.2319
62.65	-60.8215									62.65	-57.8918				62.65	-50.1709
62.7	-60.9436									62.7	-57.8003				62.7	-49.8047
62.75	-60.9436									62.75	-57.7393				62.75	-50.1709
62.8	-61.0046									62.8	-57.8918				62.8	-50.1404
62.85	-60.791									62.85	-57.8613				62.85	-50.0793
62.9	-60.73									62.9	-57.7087				62.9	-49.8047
62.95	-61.0046									62.95	-57.9224				62.95	-50.2319
63	-61.0046									63	-57.8003				63	-50.0793
63.05	-60.9741									63.05	-57.7087				63.05	-50.1099
63.1	-60.8215									63.1	-57.9529				63.1	-49.8657
63.15	-60.7605									63.15	-57.7393				63.15	-50.2014
63.2	-60.8826									63.2	-57.8003				63.2	-50.1404
63.25	-61.0046									63.25	-57.8918				63.25	-50.1709
63.3	-60.9741									63.3	-57.6172				63.3	-49.8352
63.35	-60.8826									63.35	-57.8918				63.35	-50.1709
63.4	-60.8215									63.4	-57.8003				63.4	-50.2014
63.45	-60.73									63.45	-57.7087				63.45	-50.1709
63.5	-60.8215									63.5	-57.8918				63.5	-49.8962
63.55	-61.0046									63.55	-57.6477				63.55	-50.0793
63.6	-60.9436									63.6	-57.8003				63.6	-50.2624
63.65	-60.9741									63.65	-57.8308				63.65	-50.2624
63.7	-60.9436									63.7	-57.5256				63.7	-50.0488
63.75	-60.6995									63.75	-57.9224				63.75	-50.1099
63.8	-60.7605									63.8	-57.7698				63.8	-50.354
63.85	-61.0046									63.85	-57.7393				63.85	-50.3235
63.9	-61.0657									63.9	-57.8308				63.9	-50.3235
63.95	-60.9741									63.95	-57.6782				63.95	-50.0183
64	-61.0657									64	-57.6172				64	-50.293
64.05	-60.8826									64.05	-57.8613				64.05	-50.415
64.1	-60.73									64.1	-57.6782				64.1	-50.293
64.15	-60.8215									64.15	-57.6782				64.15	-50.0793
64.2	-61.1267									64.2	-57.7393				64.2	-50.2014
64.25	-61.0657									64.25	-57.6782				64.25	-50.5066
64.3	-61.0046									64.3	-57.5867				64.3	-50.3845
64.35	-60.9436									64.35	-57.7087				64.35	-50.4456
64.4	-61.0657									64.4	-57.5867				64.4	-50.0488
64.45	-60.8826									64.45	-57.5561				64.45	-50.4761
64.5	-60.73									64.5	-57.7698				64.5	-50.5371
64.55	-60.9741									64.55	-57.6782				64.55	-50.4761
64.6	-61.1572									64.6	-57.4036				64.6	-50.3235
64.65	-61.1267									64.65	-57.7087				64.65	-50.3235
64.7	-61.0352									64.7	-57.6477				64.7	-50.5066
64.75	-61.0962									64.75	-57.373				64.75	-50.5981
64.8	-61.0657									64.8	-57.5256				64.8	-50.5066
64.85	-60.9741									64.85	-57.7393				64.85	-50.5066
64.9	-60.8215									64.9	-57.5256				64.9	-50.3235
64.95	-60.9436									64.95	-57.2815				64.95	-50.415
65	-61.2183									65	-57.5867				65	-50.6897
65.05	-61.2488									65.05	-57.5561				65.05	-50.5676
65.1	-61.1267									65.1	-57.373				65.1	-50.6287
65.15	-61.0962									65.15	-57.373				65.15	-50.2319
65.2	-61.0657									65.2	-57.5867				65.2	-50.415
65.25	-61.0657									65.25	-57.5561				65.25	-50.6287
65.3	-60.8215									65.3	-57.251				65.3	-50.6287
65.35	-61.1877									65.35	-57.6477				65.35	-50.5981
65.4	-61.2488									65.4	-57.4036				65.4	-50.4761
65.45	-61.2488									65.45	-57.4951				65.45	-50.354
65.5	-60.9741									65.5	-57.2815				65.5	-50.4761
65.55	-60.9131									65.55	-57.5867				65.55	-50.7202
65.6	-61.1572									65.6	-57.4646				65.6	-50.5676
65.65	-61.1572									65.65	-57.312				65.65	-50.5676
65.7	-60.9741									65.7	-57.251				65.7	-50.5066
65.75	-61.0352									65.75	-57.5561				65.75	-50.3845
65.8	-61.1877									65.8	-57.373				65.8	-50.5981
65.85	-61.1572									65.85	-57.2205				65.85	-50.7202
65.9	-60.9131									65.9	-57.251				65.9	-50.6897
65.95	-61.1877									65.95	-57.4951				65.95	-50.7507
66	-61.1877									66	-57.3425				66	-50.6287
66.05	-61.0352									66.05	-57.1289				66.05	-50.4456
66.1	-61.1572									66.1	-57.251				66.1	-50.6287
66.15	-60.9741									66.15	-57.373				66.15	-50.7507
66.2	-61.1267									66.2	-57.251				66.2	-50.8118
66.25	-61.1877									66.25	-57.0373				66.25	-50.6897
66.3	-60.73									66.3	-57.0679				66.3	-50.6592
66.35	-60.8826									66.35	-57.1289				66.35	-50.354
66.4	-60.73									66.4	-56.7322				66.4	-50.0793
66.45	-60.3943									66.45	-56.2744				66.45	-49.9878
66.5	-60.0891									66.5	-55.7556				66.5	-49.8352
66.55	-59.4788									66.55	-55.5115				66.55	-49.3469
66.6	-59.2957									66.6	-54.7485				66.6	-48.8586
66.65	-58.7463									66.65	-54.1382				66.65	-48.4009
66.7	-58.0444									66.7	-53.2837				66.7	-47.821
66.75	-57.8308									66.75	-52.887				66.75	-47.2717
66.8	-57.1594									66.8	-52.0325				66.8	-46.814
66.85	-56.7017									66.85	-51.2695				66.85	-46.6003
66.9	-56.3049									66.9	-50.2014				66.9	-46.2952
66.95	-55.6335									66.95	-49.6216				66.95	-45.7764
67	-55.3284									67	-48.8586				67	-45.227
67.05	-54.8096									67.05	-48.0347				67.05	-44.7998
67.1	-54.2603									67.1	-47.0581				67.1	-44.342
67.15	-53.894									67.15	-46.1426				67.15	-43.8232
67.2	-53.4363									67.2	-45.4102				67.2	-43.396
67.25	-52.8564									67.25	-44.5251				67.25	-43.0908
67.3	-52.5207									67.3	-43.5791				67.3	-42.8467
67.35	-52.124									67.35	-42.4194				67.35	-42.4194
67.4	-51.6357									67.4	-41.2598				67.4	-41.8701
67.45	-51.1475									67.45	-40.5273				67.45	-41.4123
67.5	-50.8728									67.5	-39.3372				67.5	-40.9546
67.55	-50.4456									67.55	-38.0554				67.55	-40.4358
67.6	-49.8047									67.6	-36.4685				67.6	-39.8254
67.65	-49.7436									67.65	-35.0647				67.65	-39.154
67.7	-49.2248									67.7	-33.4473				67.7	-38.8794
67.75	-48.6145									67.75	-31.1584				67.75	-38.4521
67.8	-48.3704									67.8	-28.2898				67.8	-37.9028
67.85	-48.0957									67.85	-24.2615				67.85	-37.1094
67.9	-47.5159									67.9	-19.1956				67.9	-36.3464
67.95	-47.0581									67.95	-12.7563				67.95	-35.6445
68	-46.9665									68	-4.82178				68	-34.8206
68.05	-46.5088									68.05	4.21143				68.05	-33.6914
68.1	-45.8069									68.1	13.977				68.1	-32.3181
68.15	-45.6543									68.15	23.8953				68.15	-30.9448
68.2	-45.2881									68.2	33.1726				68.2	-29.1443
68.25	-44.9524									68.25	41.748				68.25	-26.5503
68.3	-44.342									68.3	49.2859				68.3	-23.0713
68.35	-44.22									68.35	55.6946				68.35	-18.219
68.4	-43.7317									68.4	60.73				68.4	-11.8408
68.45	-43.2129									68.45	64.6057				68.45	-4.36401
68.5	-42.9687									68.5	66.864				68.5	3.9978
68.55	-42.6025									68.55	67.9626				68.55	12.8784
68.6	-42.1448									68.6	67.9016				68.6	21.7285
68.65	-41.5955									68.65	66.7114				68.65	29.9072
68.7	-41.4123									68.7	64.331				68.7	37.3535
68.75	-40.8325									68.75	60.9436				68.75	43.4875
68.8	-40.4053									68.8	56.366				68.8	48.2788
68.85	-39.8865									68.85	50.4761				68.85	51.2085
68.9	-39.7339									68.9	43.6707				68.9	52.3376
68.95	-39.0625									68.95	36.2244				68.95	51.6357
69	-38.5742									69	28.5034				69	49.408
69.05	-38.0249									69.05	20.2637				69.05	45.0134
69.1	-37.9028									69.1	11.9629				69.1	39.2456
69.15	-37.2009									69.15	3.9978				69.15	32.3181
69.2	-36.5906									69.2	-3.75366				69.2	24.2615
69.25	-35.9497									69.25	-11.2915				69.25	15.7166
69.3	-35.675									69.3	-18.5547				69.3	7.04956
69.35	-34.9426									69.35	-25.0244				69.35	-1.58691
69.4	-34.1492									69.4	-30.9448				69.4	-10.1013
69.45	-33.3557									69.45	-36.4685				69.45	-17.8833
69.5	-32.8674									69.5	-41.5344				69.5	-25.238
69.55	-31.9214									69.55	-46.0205				69.55	-32.196
69.6	-30.8838									69.6	-50.1709				69.6	-38.2385
69.65	-29.7546									69.65	-53.9856				69.65	-43.9148
69.7	-28.8086									69.7	-57.5867				69.7	-49.1028
69.75	-27.2827									69.75	-60.791				69.75	-53.5583
69.8	-25.5432									69.8	-63.5376				69.8	-57.6477
69.85	-23.2544									69.85	-65.8569				69.85	-61.4624
69.9	-20.9351									69.9	-67.9321				69.9	-64.5447
69.95	-17.6086									69.95	-69.7021				69.95	-67.3523
70	-13.4277									70	-71.167				70	-69.9463
70.05	-8.30078									70.05	-72.3267				70.05	-71.991
70.1	-2.86865									70.1	-73.2117				70.1	-73.5474
70.15	3.05176									70.15	-73.9136				70.15	-75.2258
70.2	9.67407									70.2	-74.6155				70.2	-76.2939
70.25	16.4185									70.25	-75.0732				70.25	-76.9958
70.3	22.7661									70.3	-75.4089				70.3	-77.7588
70.35	28.3508									70.35	-75.3479				70.35	-78.3386
70.4	33.5693									70.4	-75.3174				70.4	-78.6438
70.45	37.9944									70.45	-75.0732				70.45	-78.5522
70.5	41.7175									70.5	-74.7986				70.5	-78.7964
70.55	44.6167									70.55	-74.4018				70.55	-78.7964
70.6	46.3867									70.6	-73.883				70.6	-78.7048
70.65	47.76									70.65	-73.2117				70.65	-78.2776
70.7	48.5535									70.7	-72.6623				70.7	-78.3081
70.75	48.8586									70.75	-72.1741				70.75	-78.064
70.8	48.584									70.8	-71.5942				70.8	-77.6977
70.85	47.699									70.85	-70.8008				70.85	-77.1484
70.9	46.4478									70.9	-69.8852				70.9	-76.9043
70.95	45.1355									70.95	-68.9392				70.95	-76.7822
71	43.457									71	-68.512				71	-76.3855
71.05	41.5955									71.05	-67.5354				71.05	-75.8972
71.1	38.9709									71.1	-66.6809				71.1	-75.3479
71.15	36.4685									71.15	-65.6738				71.15	-75.2563
71.2	33.844									71.2	-65.094				71.2	-74.7681
71.25	31.0059									71.25	-64.1174				71.25	-74.4629
71.3	28.0762									71.3	-63.0798				71.3	-73.6694
71.35	25.1465									71.35	-62.4084				71.35	-73.6084
71.4	21.8506									71.4	-61.554				71.4	-73.3948
71.45	18.8293									71.45	-60.3638				71.45	-72.876
71.5	15.8691									71.5	-59.7839				71.5	-72.4182
71.55	13.092									71.55	-58.8989				71.55	-71.8994
71.6	10.5591									71.6	-57.7698				71.6	-71.8384
71.65	7.69043									71.65	-57.251				71.65	-71.4416
71.7	4.97436									71.7	-56.3354				71.7	-71.0449
71.75	2.74658									71.75	-55.3284				71.75	-70.5261
71.8	0.579834									71.8	-54.779				71.8	-70.2209
71.85	-1.37329									71.85	-53.8635				71.85	-70.0378
71.9	-3.14331									71.9	-52.9175				71.9	-69.6716
71.95	-5.18799									71.95	-52.3071				71.95	-69.2139
72	-7.04956									72	-51.3306				72	-68.6951
72.05	-8.69751									72.05	-50.7507				72.05	-68.5425
72.1	-10.3149									72.1	-49.9878				72.1	-68.3594
72.15	-11.8103									72.15	-49.0112				72.15	-67.9626
72.2	-13.1531									72.2	-48.5535				72.2	-67.4438
72.25	-14.7095									72.25	-47.7295				72.25	-66.925
72.3	-16.449									72.3	-46.7529				72.3	-66.7419
72.35	-18.0969									72.35	-46.2646				72.35	-66.6199
72.4	-19.5618									72.4	-45.5627				72.4	-66.1621
72.45	-21.0876									72.45	-44.6472				72.45	-65.8569
72.5	-22.6746									72.5	-44.1589				72.5	-65.3076
72.55	-24.2615									72.55	-43.4265				72.55	-65.1245
72.6	-25.9399									72.6	-42.6941				72.6	-65.0024
72.65	-27.8015									72.65	-41.9922				72.65	-64.6667
72.7	-29.7546									72.7	-41.3818				72.7	-64.331
72.75	-31.4941									72.75	-40.5579				72.75	-63.8123
72.8	-33.3557									72.8	-39.5813				72.8	-63.4155
72.85	-35.0952									72.85	-39.2456				72.85	-63.385
72.9	-36.9263									72.9	-38.269				72.9	-63.0493
72.95	-38.8184									72.95	-37.3535				72.95	-62.561
73	-40.9851									73	-36.6211				73	-62.1643
73.05	-43.0603									73.05	-35.7971				73.05	-61.7981
73.1	-44.9219									73.1	-34.668				73.1	-61.615
73.15	-46.6919									73.15	-33.4473				73.15	-61.4014
73.2	-48.584									73.2	-32.5012				73.2	-61.0352
73.25	-50.293									73.25	-31.0669				73.25	-60.7605
73.3	-51.9714									73.3	-29.2664				73.3	-60.3332
73.35	-53.4973									73.35	-27.2827				73.35	-59.8144
73.4	-55.2063									73.4	-25.177				73.4	-59.6313
73.45	-56.8542									73.45	-22.2778				73.45	-59.5093
73.5	-58.2581									73.5	-18.3716				73.5	-59.2041
73.55	-59.3567									73.55	-13.7939				73.55	-58.96
73.6	-60.6995									73.6	-8.66699				73.6	-58.5022
73.65	-61.6455									73.65	-2.41089				73.65	-58.0444
73.7	-62.4695									73.7	4.36401				73.7	-57.9529
73.75	-63.6902									73.75	11.1389				73.75	-57.8918
73.8	-64.6362									73.8	17.8833				73.8	-57.4341
73.85	-65.2771									73.85	24.4751				73.85	-57.0984
73.9	-65.7959									73.9	30.7617				73.9	-56.8542
73.95	-66.4368									73.95	35.9497				73.95	-56.3965
74	-67.1081									74	40.3442				74	-56.0913
74.05	-67.5659									74.05	44.0369				74.05	-56.1523
74.1	-67.6575									74.1	47.1802				74.1	-55.9082
74.15	-68.3594									74.15	49.1333				74.15	-55.603
74.2	-68.5425									74.2	50.0793				74.2	-55.3284
74.25	-68.6645									74.25	50.5676				74.25	-55.0537
74.3	-68.9392									74.3	50.3235				74.3	-54.8706
74.35	-69.2444									74.35	49.3164				74.35	-54.3823
74.4	-69.1223									74.4	47.1191				74.4	-54.3823
74.45	-69.3359									74.45	44.5557				74.45	-54.1992
74.5	-69.4275									74.5	41.3513				74.5	-53.9856
74.55	-69.2139									74.55	37.6892				74.55	-53.6804
74.6	-69.458									74.6	33.1116				74.6	-53.3447
74.65	-69.458									74.65	28.0151				74.65	-53.0395
74.7	-69.2139									74.7	23.1323				74.7	-52.7344
74.75	-69.519									74.75	17.6392				74.75	-52.6428
74.8	-69.2139									74.8	12.2681				74.8	-52.4902
74.85	-69.0918									74.85	6.37817				74.85	-52.3376
74.9	-69.1223									74.9	1.12915				74.9	-52.0325
74.95	-68.8171									74.95	-4.02832				74.95	-51.9104
75	-68.9392									75	-8.91113				75	-51.4526
75.05	-68.6951									75.05	-13.5193				75.05	-51.1475
75.1	-68.4814									75.1	-18.1885				75.1	-50.9033
75.15	-68.7256									75.15	-22.3999				75.15	-50.8118
75.2	-68.4814									75.2	-26.2146				75.2	-50.6592
75.25	-67.9626									75.25	-29.8157				75.25	-50.5066
75.3	-68.2373									75.3	-32.9895				75.3	-50.2319
75.35	-68.0542									75.35	-36.5295				75.35	-49.9878
75.4	-67.749									75.4	-39.5508				75.4	-49.8047
75.45	-67.8101									75.45	-42.2058				75.45	-49.4385
75.5	-67.688									75.5	-44.6777				75.5	-49.1638
75.55	-67.2607									75.55	-47.0886				75.55	-48.7976
75.6	-67.5049									75.6	-49.53				75.6	-48.645
75.65	-67.1387									75.65	-51.7883				75.65	-48.584
75.7	-66.8335									75.7	-53.4668				75.7	-48.3704
75.75	-67.0471									75.75	-55.1758				75.75	-48.2178
75.8	-66.864									75.8	-56.5491				75.8	-47.9126
75.85	-66.4978									75.85	-58.0749				75.85	-47.699
75.9	-66.3757									75.9	-59.4177				75.9	-47.3633
75.95	-66.4368									75.95	-60.3943				75.95	-47.1497
76	-66.2842									76	-61.2183				76	-46.814
76.05	-65.7959									76.05	-61.8896				76.05	-46.5698
76.1	-65.918									76.1	-62.2253				76.1	-46.3257
76.15	-65.8569									76.15	-62.8357				76.15	-46.2341
76.2	-65.5212									76.2	-63.4155				76.2	-46.0815
76.25	-65.3686									76.25	-63.5986				76.25	-45.8069
76.3	-65.4297									76.3	-63.5681				76.3	-45.6238
76.35	-65.2466									76.35	-63.6291				76.35	-45.3796
76.4	-64.7583									76.4	-63.5986				76.4	-45.0134
76.45	-65.0024									76.45	-63.4766				76.45	-44.8303
76.5	-64.7278									76.5	-63.446				76.5	-44.4946
76.55	-64.6057									76.55	-63.2019				76.55	-44.281
76.6	-64.3005									76.6	-62.8357				76.6	-43.9148
76.65	-64.3921									76.65	-62.5305				76.65	-43.4875
76.7	-64.1479									76.7	-62.0422				76.7	-43.3655
76.75	-63.9648									76.75	-61.4319				76.75	-43.2434
76.8	-63.7512									76.8	-61.2793				76.8	-43.1519
76.85	-63.9954									76.85	-60.852				76.85	-42.6941
76.9	-63.5681									76.9	-60.2722				76.9	-42.4499
76.95	-63.2324									76.95	-59.7229				76.95	-42.0837
77	-63.2324									77	-59.082				77	-41.7175
77.05	-63.1714									77.05	-58.4106				77.05	-41.5344
77.1	-63.0493									77.1	-57.8613				77.1	-41.3208
77.15	-62.6221									77.15	-57.373				77.15	-40.9546
77.2	-62.7136									77.2	-56.9458				77.2	-40.4968
77.25	-62.6221									77.25	-56.2439				77.25	-40.2832
77.3	-62.4695									77.3	-55.542				77.3	-39.9475
77.35	-62.1033									77.35	-55.0232				77.35	-39.6118
77.4	-62.1643									77.4	-54.2908				77.4	-38.9709
77.45	-62.1643									77.45	-53.5583				77.45	-38.8489
77.5	-62.0117									77.5	-53.0701				77.5	-38.208
77.55	-61.554									77.55	-52.6428				77.55	-37.5061
77.6	-61.676									77.6	-52.1545				77.6	-37.2314
77.65	-61.615									77.65	-51.3306				77.65	-36.4685
77.7	-61.4929									77.7	-50.7812				77.7	-35.4004
77.75	-61.1877									77.75	-50.2014				77.75	-34.8511
77.8	-61.0657									77.8	-49.53				77.8	-33.5998
77.85	-61.1267									77.85	-48.7976				77.85	-32.0435
77.9	-60.8826									77.9	-48.3398				77.9	-30.365
77.95	-60.6689									77.95	-48.0041				77.95	-27.4963
78	-60.4553									78	-47.6074				78	-23.8647
78.05	-60.6079									78.05	-46.9971				78.05	-18.7988
78.1	-60.4553									78.1	-46.3562				78.1	-12.207
78.15	-60.3027									78.15	-45.8679				78.15	-4.36401
78.2	-60.0891									78.2	-45.3491				78.2	4.05884
78.25	-59.9365									78.25	-44.6167				78.25	13.2446
78.3	-59.9365									78.3	-44.1894				78.3	22.2473
78.35	-59.8144									78.35	-43.8843				78.35	30.4871
78.4	-59.6924									78.4	-43.5181				78.4	37.8113
78.45	-59.3262									78.45	-43.0603				78.45	43.8843
78.5	-59.4177									78.5	-42.5415				78.5	48.1262
78.55	-59.2651									78.55	-41.9922				78.55	50.8728
78.6	-59.2041									78.6	-41.6565				78.6	51.8799
78.65	-58.96									78.65	-41.0156				78.65	50.5066
78.7	-58.6548									78.7	-40.4968				78.7	47.8821
78.75	-58.8379									78.75	-39.917				78.75	43.7317
78.8	-58.7158									78.8	-39.5203				78.8	37.6587
78.85	-58.5937									78.85	-39.1235				78.85	30.5481
78.9	-58.1055									78.9	-38.7878				78.9	22.8577
78.95	-58.0749									78.95	-38.2385				78.95	14.8621
79	-58.136									79	-37.7502				79	6.04248
79.05	-58.0444									79.05	-37.2009				79.05	-2.19727
79.1	-57.7393									79.1	-36.438				79.1	-10.0098
79.15	-57.5256									79.15	-35.9802				79.15	-17.3035
79.2	-57.4341									79.2	-35.675				79.2	-24.6887
79.25	-57.4951									79.25	-34.9121				79.25	-30.9448
79.3	-57.3425									79.3	-34.2407				79.3	-36.6821
79.35	-57.1594									79.35	-33.3557				79.35	-41.8396
79.4	-56.9458									79.4	-33.1116				79.4	-47.0581
79.45	-56.6406									79.45	-32.1045				79.45	-51.3611
79.5	-56.7627									79.5	-31.1279				79.5	-55.3284
79.55	-56.6711									79.55	-30.365				79.55	-58.6243
79.6	-56.488									79.6	-29.3884				79.6	-62.1338
79.65	-56.3965									79.65	-28.0762				79.65	-65.0635
79.7	-56.0913									79.7	-26.8555				79.7	-67.5659
79.75	-55.9692									79.75	-25.4211				79.75	-69.5496
79.8	-56.0608									79.8	-23.6511				79.8	-71.2891
79.85	-55.9998									79.85	-21.7285				79.85	-73.2117
79.9	-55.7251									79.9	-19.4092				79.9	-74.3713
79.95	-55.5115									79.95	-16.3879				79.95	-75.3479
80	-55.2978									80	-13.6108				80	-75.9582
80.05	-55.2063									80.05	-9.85718				80.05	-76.6601
80.1	-55.2978									80.1	-5.70679				80.1	-77.1484
80.15	-55.1453									80.15	-1.7395				80.15	-77.3926
80.2	-54.9622									80.2	2.71606				80.2	-77.5146
80.25	-54.8096									80.25	7.08008				80.25	-77.5452
80.3	-54.6265									80.3	11.3831				80.3	-77.3926
80.35	-54.4128									80.35	15.7166				80.35	-77.4536
80.4	-54.6265									80.4	19.1956				80.4	-77.301
80.45	-54.5349									80.45	22.7661				80.45	-77.1789
80.5	-54.2908									80.5	26.001				80.5	-76.8738
80.55	-54.1687									80.55	28.2288				80.55	-76.355
80.6	-53.9551									80.6	30.2734				80.6	-76.416
80.65	-53.7415									80.65	32.135				80.65	-76.1719
80.7	-53.7415									80.7	32.9285				80.7	-75.8362
80.75	-53.8025									80.75	33.6914				80.75	-75.2869
80.8	-53.6804									80.8	34.2102				80.8	-74.7375
80.85	-53.5278									80.85	33.7219				80.85	-74.7681
80.9	-53.4363									80.9	33.3557				80.9	-74.585
80.95	-53.2227									80.95	32.5317				80.95	-74.0356
81	-52.9175									81	31.1279				81	-73.7305
81.05	-53.0701									81.05	29.6326				81.05	-73.2727
81.1	-53.009									81.1	27.771				81.1	-72.8149
81.15	-53.009									81.15	25.8179				81.15	-72.7539
81.2	-52.8259									81.2	23.1628				81.2	-72.3877
81.25	-52.7344									81.25	20.7214				81.25	-71.9604
81.3	-52.5513									81.3	18.1885				81.3	-71.6247
81.35	-52.3682									81.35	14.9841				81.35	-71.0144
81.4	-52.124									81.4	11.9629				81.4	-70.6787
81.45	-52.1851									81.45	8.97217				81.45	-70.5261
81.5	-52.2156									81.5	6.073				81.5	-70.1599
81.55	-52.0935									81.55	2.7771				81.55	-69.7327
81.6	-52.0019									81.6	-0.152588				81.6	-69.3359
81.65	-51.9714									81.65	-2.92969				81.65	-68.9087
81.7	-51.7883									81.7	-5.79834				81.7	-68.512
81.75	-51.5747									81.75	-8.63647				81.75	-68.3594
81.8	-51.4526									81.8	-11.2305				81.8	-68.0542
81.85	-51.4526									81.85	-13.4277				81.85	-67.6269
81.9	-51.5137									81.9	-16.0217				81.9	-67.3828
81.95	-51.4526									81.95	-18.1885				81.95	-66.8335
82	-51.2695									82	-20.2942				82	-66.4368
82.05	-51.1475									82.05	-22.0947				82.05	-66.1926
82.1	-50.8423									82.1	-24.3835				82.1	-66.0705
82.15	-50.8423									82.15	-26.1536				82.15	-65.6738
82.2	-50.8118									82.2	-27.8931				82.2	-65.3381
82.25	-50.8118									82.25	-29.5715				82.25	-64.9719
82.3	-50.4761									82.3	-31.4331				82.3	-64.4531
82.35	-50.5371									82.35	-33.02				82.35	-64.0869
82.4	-50.4456									82.4	-34.5154				82.4	-63.9954
82.45	-50.2624									82.45	-35.8582				82.45	-63.7817
82.5	-50.0793									82.5	-37.5061				82.5	-63.4766
82.55	-50.2014									82.55	-38.8489				82.55	-63.1103
82.6	-49.8962									82.6	-40.0391				82.6	-62.6831
82.65	-49.7436									82.65	-41.1072				82.65	-62.1948
82.7	-49.9573									82.7	-42.4194				82.7	-61.8591
82.75	-49.53									82.75	-43.5791				82.75	-61.7371
82.8	-49.6216									82.8	-44.5251				82.8	-61.4624
82.85	-49.5605									82.85	-45.3796				82.85	-61.1877
82.9	-49.1943									82.9	-46.2036				82.9	-60.8826
82.95	-49.4385									82.95	-47.1802				82.95	-60.6079
83	-49.1943									83	-47.8821				83	-60.0281
83.05	-48.9807									83.05	-48.4009				83.05	-59.6619
83.1	-49.0723									83.1	-48.8892				83.1	-59.3567
83.15	-48.7976									83.15	-49.6521				83.15	-59.2957
83.2	-48.8892									83.2	-50.0488				83.2	-58.9905
83.25	-48.7671									83.25	-50.5371				83.25	-58.6243
83.3	-48.3704									83.3	-50.5981				83.3	-58.3191
83.35	-48.6755									83.35	-51.1475				83.35	-58.0749
83.4	-48.3093									83.4	-51.5137				83.4	-57.7393
83.45	-48.2788									83.45	-51.6663				83.45	-57.3425
83.5	-48.3093									83.5	-51.6357				83.5	-56.9763
83.55	-48.0347									83.55	-51.6968				83.55	-56.9153
83.6	-48.0957									83.6	-52.063				83.6	-56.7627
83.65	-47.9431									83.65	-52.124				83.65	-56.5491
83.7	-47.699									83.7	-52.0325				83.7	-56.2134
83.75	-47.8516									83.75	-51.8799				83.75	-55.9387
83.8	-47.7905									83.8	-51.7578				83.8	-55.7861
83.85	-47.4548									83.85	-51.8799				83.85	-55.4504
83.9	-47.6379									83.9	-51.6663				83.9	-55.0232
83.95	-47.5464									83.95	-51.5747				83.95	-54.718
84	-47.2107									84	-51.3				84	-54.5044
84.05	-47.3328									84.05	-50.9949				84.05	-54.3823
84.1	-47.2717									84.1	-50.9949				84.1	-54.1687
84.15	-47.0581									84.15	-50.8423				84.15	-54.0466
84.2	-47.0581									84.2	-50.6287				84.2	-53.5889
84.25	-46.9971									84.25	-50.3235				84.25	-53.3447
84.3	-46.875									84.3	-49.8352				84.3	-53.1006
84.35	-46.6003									84.35	-49.8962				84.35	-52.948
84.4	-46.814									84.4	-49.7131				84.4	-52.4902
84.45	-46.5698									84.45	-49.3774				84.45	-52.2461
84.5	-46.3257									84.5	-49.0723				84.5	-51.7883
84.55	-46.4172									84.55	-48.584				84.55	-51.6663
84.6	-46.3257									84.6	-48.5535				84.6	-51.4832
84.65	-46.1426									84.65	-48.4924				84.65	-51.3306
84.7	-46.051									84.7	-48.1567				84.7	-51.0559
84.75	-46.1121									84.75	-47.9431				84.75	-50.9644
84.8	-45.99									84.8	-47.5464				84.8	-50.6897
84.85	-45.6848									84.85	-47.1191				84.85	-50.354
84.9	-45.8374									84.9	-47.0886				84.9	-50.1404
84.95	-45.7153									84.95	-46.9665				84.95	-49.9573
85	-45.5017									85	-46.5088				85	-49.7131
85.05	-45.3491									85.05	-46.2036				85.05	-49.3469
85.1	-45.5322									85.1	-45.8374				85.1	-49.0112
85.15	-45.3186									85.15	-45.4407				85.15	-48.9197
85.2	-44.9829									85.2	-45.3491				85.2	-48.8281
85.25	-45.105									85.25	-45.1355				85.25	-48.6145
85.3	-45.105									85.3	-44.7082				85.3	-48.3093
85.35	-44.9524									85.35	-44.4031				85.35	-48.0957
85.4	-44.4946									85.4	-44.0979				85.4	-47.6685
85.45	-44.7388									85.45	-43.5486				85.45	-47.699
85.5	-44.7388									85.5	-43.335				85.5	-47.4548
85.55	-44.5557									85.55	-43.2739				85.55	-47.1802
85.6	-44.22									85.6	-42.9687				85.6	-46.6919
85.65	-44.4641									85.65	-42.511				85.65	-46.7834
85.7	-44.3726									85.7	-42.1448				85.7	-46.4783
85.75	-44.22									85.75	-41.7786				85.75	-46.1426
85.8	-43.9148									85.8	-41.4429				85.8	-45.8374
85.85	-44.1589									85.85	-41.2598				85.85	-45.8679
85.9	-43.9758									85.9	-40.9546				85.9	-45.5017
85.95	-43.8538									85.95	-40.6799				85.95	-45.0439
86	-43.5791									86	-40.3442				86	-45.1355
86.05	-43.7927									86.05	-40.0085				86.05	-44.7998
86.1	-43.7012									86.1	-39.6423				86.1	-44.4031
86.15	-43.6401									86.15	-39.2456				86.15	-44.3726
86.2	-43.335									86.2	-39.1235				86.2	-44.0979
86.25	-43.5181									86.25	-38.9099				86.25	-43.6707
86.3	-43.457									86.3	-38.6658				86.3	-43.6401
86.35	-43.3655									86.35	-38.1775				86.35	-43.2739
86.4	-43.0298									86.4	-37.9944				86.4	-42.9993
86.45	-43.1824									86.45	-37.5977				86.45	-42.9077
86.5	-43.1824									86.5	-37.2009				86.5	-42.511
86.55	-43.0908									86.55	-36.7432				86.55	-42.1448
86.6	-42.8772									86.6	-36.6516				86.6	-42.0227
86.65	-42.8467									86.65	-36.3769				86.65	-41.6565
86.7	-42.9687									86.7	-36.0107				86.7	-41.1682
86.75	-42.8467									86.75	-35.675				86.75	-40.9851
86.8	-42.7551									86.8	-35.4309				86.8	-40.6189
86.85	-42.511									86.85	-34.9121				86.85	-40.1001
86.9	-42.6941									86.9	-34.5154				86.9	-39.856
86.95	-42.6331									86.95	-34.0576				86.95	-39.5203
87	-42.5415									87	-33.6914				87	-38.7573
87.05	-42.1753									87.05	-33.3252				87.05	-38.6047
87.1	-42.2363									87.1	-33.0505				87.1	-37.9333
87.15	-42.4805									87.15	-32.7148				87.15	-37.1704
87.2	-42.2668									87.2	-32.196				87.2	-36.438
87.25	-42.2058									87.25	-31.6162				87.25	-35.8887
87.3	-41.9311									87.3	-31.0669				87.3	-34.7595
87.35	-42.0532									87.35	-30.426				87.35	-33.2642
87.4	-42.2058									87.4	-30.0903				87.4	-31.8603
87.45	-42.0227									87.45	-29.6936				87.45	-29.8157
87.5	-41.9617									87.5	-29.0833				87.5	-26.6418
87.55	-41.7175									87.55	-28.5339				87.55	-22.0337
87.6	-41.8091									87.6	-27.5879				87.6	-16.6626
87.65	-41.9617									87.65	-27.0996				87.65	-9.79614
87.7	-41.8091									87.7	-26.3977				87.7	-1.58691
87.75	-41.748									87.75	-25.6653				87.75	7.41577
87.8	-41.4123									87.8	-24.6277				87.8	16.1743
87.85	-41.626									87.85	-23.9258				87.85	24.7803
87.9	-41.6565									87.9	-22.8271				87.9	32.8369
87.95	-41.687									87.95	-21.4844				87.95	39.8254
88	-41.4734									88	-20.6909				88	45.0745
88.05	-41.3208									88.05	-19.104				88.05	48.6755
88.1	-41.1377									88.1	-17.4255				88.1	50.7202
88.15	-41.3818									88.15	-16.2353				88.15	50.9949
88.2	-41.3513									88.2	-14.4348				88.2	49.4995
88.25	-41.1377									88.25	-12.4207				88.25	45.7764
88.3	-41.0767									88.3	-10.7422				88.3	40.9851
88.35	-40.8325									88.35	-8.5144				88.35	34.8206
88.4	-40.863									88.4	-6.65283				88.4	27.7405
88.45	-41.0156									88.45	-4.3335				88.45	19.4397
88.5	-40.863									88.5	-1.89209				88.5	11.1694
88.55	-40.8325									88.55	-0.152588				88.55	2.92969
88.6	-40.7104									88.6	2.13623				88.6	-5.00488
88.65	-40.3748									88.65	4.36401				88.65	-12.7869
88.7	-40.4663									88.7	6.2561				88.7	-20.2942
88.75	-40.6799									88.75	8.3313				88.75	-26.8555
88.8	-40.6494									88.8	9.85718				88.8	-32.9895
88.85	-40.4968									88.85	11.6577				88.85	-38.4521
88.9	-40.3748									88.9	13.3667				88.9	-43.7317
88.95	-40.1306									88.95	14.2822				88.95	-48.4924
89	-40.1306									89	15.4419				89	-52.7649
89.05	-40.2222									89.05	16.7847				89.05	-56.5186
89.1	-40.2222									89.1	17.2119				89.1	-59.906
89.15	-40.1611									89.15	17.9749				89.15	-62.8662
89.2	-40.1611									89.2	18.6157				89.2	-65.7654
89.25	-40.0391									89.25	18.6768				89.25	-68.2983
89.3	-39.7644									89.3	18.9209				89.3	-70.2515
89.35	-39.856									89.35	19.1345				89.35	-71.991
89.4	-40.0085									89.4	18.7073				89.4	-73.2117
89.45	-40.0391									89.45	18.6768				89.45	-74.4629
89.5	-39.856									89.5	18.3716				89.5	-75.6226
89.55	-39.917									89.55	17.6697				89.55	-76.2939
89.6	-39.7644									89.6	16.9678				89.6	-76.7822
89.65	-39.6423									89.65	16.449				89.65	-77.0264
89.7	-39.5203									89.7	15.7776				89.7	-77.0874
89.75	-39.7339									89.75	14.4958				89.75	-77.3315
89.8	-39.7339									89.8	13.5498				89.8	-77.5452
89.85	-39.6728									89.85	12.7258				89.85	-77.4536
89.9	-39.5203									89.9	11.5356				89.9	-77.3315
89.95	-39.5203									89.95	10.2234				89.95	-77.0569
90	-39.3677									90	9.00268				90	-76.7212
90.05	-39.2761									90.05	8.02612				90.05	-76.3855
90.1	-39.1235									90.1	6.28662				90.1	-76.2634
90.15	-39.2456									90.15	5.0354				90.15	-76.0498
90.2	-39.3677									90.2	3.8147				90.2	-75.7751
90.25	-39.3372									90.25	2.50244				90.25	-75.3784
90.3	-39.154									90.3	0.88501				90.3	-75.0732
90.35	-39.0015									90.35	-0.366211				90.35	-74.6155
90.4	-38.8489									90.4	-1.61743				90.4	-74.0967
90.45	-39.093									90.45	-3.08228				90.45	-74.0051
90.5	-39.032									90.5	-4.5166				90.5	-73.7915
90.55	-38.8184									90.55	-5.88989				90.55	-73.5168
90.6	-38.6658									90.6	-6.92749				90.6	-73.0896
90.65	-38.9099									90.65	-8.57544				90.65	-72.7844
90.7	-38.9099									90.7	-9.85718				90.7	-72.3572
90.75	-38.7573									90.75	-11.2				90.75	-71.8384
90.8	-38.6658									90.8	-12.085				90.8	-71.5332
90.85	-38.9099									90.85	-13.6108				90.85	-71.4722
90.9	-38.7268									90.9	-14.8621				90.9	-71.1059
90.95	-38.6353									90.95	-15.9912				90.95	-70.8313
91	-38.9404									91	-16.7847				91	-70.3735
91.05	-38.7268									91.05	-18.219				91.05	-69.9463
91.1	-38.7573									91.1	-19.3481				91.1	-69.6106
91.15	-38.8184									91.15	-20.3552				91.15	-69.1223
91.2	-38.6047									91.2	-21.3013				91.2	-68.8171
91.25	-38.9404									91.25	-22.4915				91.25	-68.6645
91.3	-38.8489									91.3	-23.468				91.3	-68.4814
91.35	-38.6963									91.35	-24.5666				91.35	-68.0847
91.4	-38.9709									91.4	-25.238				91.4	-67.6575
91.45	-38.8184									91.45	-26.3672				91.45	-67.2607
91.5	-38.9404									91.5	-27.4353				91.5	-66.925
91.55	-38.9099									91.55	-28.3203				91.55	-66.4062
91.6	-38.6963									91.6	-28.9917				91.6	-66.1316
91.65	-38.9709									91.65	-29.9988				91.65	-65.8874
91.7	-38.8184									91.7	-31.0364				91.7	-65.7043
91.75	-38.8489									91.75	-31.7993				91.75	-65.4602
91.8	-39.1235									91.8	-32.5317				91.8	-65.0024
91.85	-38.8184									91.85	-33.2947				91.85	-64.6057
91.9	-39.0625									91.9	-34.3323				91.9	-64.331
91.95	-39.0625									91.95	-35.1257				91.95	-64.0259
92	-38.8489									92	-35.7666				92	-63.5071
92.05	-39.1846									92.05	-36.3769				92.05	-63.2629
92.1	-39.093									92.1	-37.2314				92.1	-62.8357
92.15	-38.8794									92.15	-38.1165				92.15	-62.7441
92.2	-39.2761									92.2	-38.5742				92.2	-62.5
92.25	-39.2151									92.25	-39.154				92.25	-62.2559
92.3	-38.8489									92.3	-39.5203				92.3	-61.9507
92.35	-39.2151									92.35	-40.4663				92.35	-61.676
92.4	-39.2456									92.4	-40.9241				92.4	-61.1877
92.45	-38.9404									92.45	-41.2903				92.45	-60.9741
92.5	-39.154									92.5	-41.6565				92.5	-60.6079
92.55	-39.154									92.55	-41.8701				92.55	-60.3332
92.6	-39.154									92.6	-42.4194				92.6	-59.967
92.65	-39.093									92.65	-42.7551				92.65	-59.5093
92.7	-39.2456									92.7	-42.9077				92.7	-59.2041
92.75	-39.2456									92.75	-43.1213				92.75	-59.1125
92.8	-39.0625									92.8	-43.2434				92.8	-58.8989
92.85	-39.4592									92.85	-43.6707				92.85	-58.6243
92.9	-39.2456									92.9	-43.8232				92.9	-58.3801
92.95	-39.154									92.95	-44.0369				92.95	-58.1055
93	-39.3982									93	-44.0674				93	-57.8918
93.05	-39.5508									93.05	-43.9758				93.05	-57.4036
93.1	-39.3982									93.1	-44.3115				93.1	-57.2205
93.15	-39.2761									93.15	-44.5557				93.15	-57.0679
93.2	-39.6423									93.2	-44.4946				93.2	-56.7017
93.25	-39.6423									93.25	-44.5557				93.25	-56.366
93.3	-39.5508									93.3	-44.5251				93.3	-55.9998
93.35	-39.5813									93.35	-44.5557				93.35	-55.7556
93.4	-39.8865									93.4	-44.7082				93.4	-55.5725
93.45	-39.7644									93.45	-44.7082				93.45	-55.5115
93.5	-39.6423									93.5	-44.5862				93.5	-55.3284
93.55	-39.9475									93.55	-44.7082				93.55	-54.9316
93.6	-40.0696									93.6	-44.4031				93.6	-54.6265
93.65	-39.978									93.65	-44.342				93.65	-54.3518
93.7	-40.0085									93.7	-44.4031				93.7	-53.9246
93.75	-40.3442									93.75	-44.4946				93.75	-53.9246
93.8	-40.3442									93.8	-44.1894				93.8	-53.7109
93.85	-40.2832									93.85	-44.0674				93.85	-53.3752
93.9	-40.3748									93.9	-43.8232				93.9	-52.8259
93.95	-40.6494									93.95	-43.6096				93.95	-52.7649
94	-40.5273									94	-43.6707				94	-52.7344
94.05	-40.6494									94.05	-43.6401				94.05	-52.3071
94.1	-40.6799									94.1	-43.3655				94.1	-51.8799
94.15	-40.9546									94.15	-43.1824				94.15	-51.9409
94.2	-40.8936									94.2	-42.9077				94.2	-51.7578
94.25	-40.802									94.25	-42.5415				94.25	-51.0559
94.3	-40.9546									94.3	-42.3279				94.3	-51.239
94.35	-41.1682									94.35	-42.3584				94.35	-50.9644
94.4	-41.2598									94.4	-42.1143				94.4	-50.5981
94.45	-41.2292									94.45	-41.7786				94.45	-50.6897
94.5	-41.1072									94.5	-41.5649				94.5	-50.2624
94.55	-41.4429									94.55	-41.2598				94.55	-49.7131
94.6	-41.4429									94.6	-40.8936				94.6	-49.9878
94.65	-41.4429									94.65	-40.5273				94.65	-49.7131
94.7	-41.3818									94.7	-40.5273				94.7	-49.0417
94.75	-41.748									94.75	-40.3748				94.75	-49.1943
94.8	-41.7175									94.8	-40.2222				94.8	-49.0112
94.85	-41.8091									94.85	-39.7949				94.85	-48.584
94.9	-41.5955									94.9	-39.5813				94.9	-48.5535
94.95	-41.8701									94.95	-39.3066				94.95	-48.2788
95	-42.1143									95	-38.9099				95	-47.8516
95.05	-42.1448									95.05	-38.7878				95.05	-48.0347
95.1	-42.1143									95.1	-38.6963				95.1	-47.6685
95.15	-42.1753									95.15	-38.4827				95.15	-47.1191
95.2	-42.4805									95.2	-38.1775				95.2	-47.3328
95.25	-42.511									95.25	-37.8418				95.25	-46.9665
95.3	-42.572									95.3	-37.6892				95.3	-46.6614
95.35	-42.3279									95.35	-37.3535				95.35	-46.4478
95.4	-42.6636									95.4	-37.1094				95.4	-46.3257
95.45	-42.8772									95.45	-36.6821				95.45	-46.0205
95.5	-42.9077									95.5	-36.6516				95.5	-45.5322
95.55	-42.8162									95.55	-36.5295				95.55	-45.6543
95.6	-42.7246									95.6	-36.3769				95.6	-45.3491
95.65	-43.1213									95.65	-36.0107				95.65	-45.0439
95.7	-43.2739									95.7	-35.7971				95.7	-44.7082
95.75	-43.1519									95.75	-35.4004				95.75	-44.7693
95.8	-43.1824									95.8	-35.2478				95.8	-44.3726
95.85	-43.0908									95.85	-35.0952				95.85	-44.1284
95.9	-43.4875									95.9	-34.79				95.9	-43.8538
95.95	-43.4875									95.95	-34.3323				95.95	-43.8538
96	-43.4875									96	-33.9661				96	-43.4265
96.05	-43.4875									96.05	-33.8745				96.05	-43.1519
96.1	-43.3655									96.1	-33.4778				96.1	-42.7856
96.15	-43.5791									96.15	-32.8979				96.15	-42.7551
96.2	-43.7622									96.2	-32.8979				96.2	-42.3584
96.25	-43.7622									96.25	-32.4097				96.25	-42.0227
96.3	-43.8538									96.3	-31.9824				96.3	-41.5955
96.35	-43.7012									96.35	-31.9519				96.35	-41.5039
96.4	-43.6707									96.4	-31.5247				96.4	-41.1072
96.45	-44.0063									96.45	-30.9448				96.45	-40.741
96.5	-44.0369									96.5	-30.8838				96.5	-40.2527
96.55	-44.0674									96.55	-30.4871				96.55	-40.1916
96.6	-43.9453									96.6	-29.9377				96.6	-39.7339
96.65	-43.9148									96.65	-29.7241				96.65	-39.2151
96.7	-44.0979									96.7	-29.1748				96.7	-38.6658
96.75	-44.3726									96.75	-28.9001				96.75	-38.3606
96.8	-44.2505									96.8	-28.4119				96.8	-37.8723
96.85	-44.3726									96.85	-27.6794				96.85	-37.262
96.9	-44.342									96.9	-27.5269				96.9	-36.499
96.95	-44.1894									96.95	-26.8555				96.95	-35.8887
97	-44.281									97	-26.4587				97	-35.2173
97.05	-44.4946									97.05	-25.8484				97.05	-34.2102
97.1	-44.5862									97.1	-25.1465				97.1	-32.9895
97.15	-44.5862									97.15	-24.8718				97.15	-31.1279
97.2	-44.4946									97.2	-24.231				97.2	-29.2969
97.25	-44.3115									97.25	-23.2544				97.25	-26.4893
97.3	-44.4336									97.3	-22.9797				97.3	-22.3999
97.35	-44.6777									97.35	-22.2473				97.35	-16.7847
97.4	-44.7082									97.4	-21.3623				97.4	-10.0403
97.45	-44.7082									97.45	-20.874				97.45	-2.50244
97.5	-44.7082									97.5	-20.0195				97.5	6.16455
97.55	-44.6777									97.55	-19.1956				97.55	15.0452
97.6	-44.4946									97.6	-18.5852				97.6	23.9563
97.65	-44.5862									97.65	-17.6392				97.65	31.8603
97.7	-44.7998									97.7	-16.571				97.7	38.4521
97.75	-44.8608									97.75	-15.9912				97.75	44.0063
97.8	-44.8608									97.8	-14.9231				97.8	47.9431
97.85	-44.9219									97.85	-13.6414				97.85	50.293
97.9	-44.9829									97.9	-13.0005				97.9	50.8118
97.95	-44.8303									97.95	-11.9629				97.95	49.2248
98	-44.7693									98	-10.7422				98	46.1121
98.05	-44.9524									98.05	-9.79614				98.05	41.5039
98.1	-45.166									98.1	-8.81958				98.1	35.614
98.15	-45.166									98.15	-7.69043				98.15	28.8086
98.2	-45.1355									98.2	-6.50024				98.2	20.813
98.25	-45.2576									98.25	-5.70679				98.25	12.5732
98.3	-45.2881									98.3	-4.60815				98.3	4.36401
98.35	-45.1965									98.35	-3.32642				98.35	-3.57056
98.4	-44.8914									98.4	-2.59399				98.4	-11.2
98.45	-45.1965									98.45	-1.52588				98.45	-18.0664
98.5	-45.3796									98.5	-0.579834				98.5	-25.1465
98.55	-45.4407									98.55	0.366211				98.55	-31.3416
98.6	-45.3491									98.6	1.0376				98.6	-36.8957
98.65	-45.3491									98.65	2.01416				98.65	-41.9922
98.7	-45.3491									98.7	3.02124				98.7	-46.6614
98.75	-45.2576									98.75	3.54004				98.75	-50.7812
98.8	-45.4407									98.8	4.27246				98.8	-54.657
98.85	-45.4102									98.85	4.97436				98.85	-58.3496
98.9	-45.4407									98.9	5.92041				98.9	-61.6455
98.95	-45.2881									98.95	6.10352				98.95	-64.331
99	-45.5017									99	6.74438				99	-66.7725
99.05	-45.5322									99.05	7.2937				99.05	-68.8171
99.1	-45.3491									99.1	7.78198				99.1	-70.5566
99.15	-45.5322									99.15	7.84302				99.15	-72.052
99.2	-45.4407									99.2	8.39233				99.2	-73.4558
99.25	-45.3186									99.25	8.75854				99.25	-74.585
99.3	-45.4712									99.3	8.97217				99.3	-75.3479
99.35	-45.5627									99.35	8.94165				99.35	-75.9582
99.4	-45.2576									99.4	9.21631				99.4	-76.2634
99.45	-45.4712									99.45	9.46045				99.45	-76.4465
99.5	-45.5017									99.5	9.39941				99.5	-76.5076
99.55	-45.227									99.55	9.21631				99.55	-76.5381
99.6	-45.5017									99.6	9.39941				99.6	-76.5686
99.65	-45.3491									99.65	9.39941				99.65	-76.6296
99.7	-45.3796									99.7	9.27734				99.7	-76.5381
99.75	-45.3796									99.75	8.94165				99.75	-76.2939
99.8	-45.0745									99.8	8.94165				99.8	-76.0498
99.85	-45.4102									99.85	8.88061				99.85	-75.7141
99.9	-45.3186									99.9	8.69751				99.9	-75.4089
99.95	-45.166									99.95	8.14819				99.95	-75.0732
[truncated: 18,644 more rows]

## Sheet: Fig 1. supplement 4b 
0	-61.3708	-62.3169	-62.1643	-62.9883	-62.2559	Current/MP traces						0	-58.6853	-57.4341	-57.9224	-58.0444	0	0			0	-51.5442	-51.3916	-51.3306	-51.4221	0	0						13516021		Current traces
0.05	-61.3098	-62.2253	-62.2253	-62.8357	-62.4084							0.05	-58.4717	-57.6172	-57.8613	-58.3191	300	0			0.05	-51.4832	-51.3306	-51.178	-51.2085	400	0					0	0.98819	-2.5504	-1.40236	-4.5849	1.33696	0.588547	3.2988
0.1	-61.4929	-62.1338	-62.0117	-62.9272	-62.2253							0.1	-58.5327	-57.5561	-58.0749	-58.3496					0.1	-51.239	-51.1169	-51.4832	-51.1475							0.05	-0.842865	-1.3297	-0.181656	0.297913	-0.188919	2.4196	3.60397
0.15	-61.676	-62.4695	-62.0117	-63.1103	-62.3474							0.15	-58.3191	-57.312	-58.0749	-58.1665					0.15	-51.4832	-51.3611	-51.4221	-51.2085							0.1	-1.45322	-0.414169	1.03905	-1.22797	-3.24068	2.11443	6.35055
0.2	-61.4624	-62.2559	-62.3169	-63.1103	-62.4084							0.2	-58.6548	-57.373	-57.8918	-58.1665					0.2	-51.5747	-51.2085	-51.4526	-51.0864							0.15	-2.06357	-1.3297	-2.31789	-2.44867	-2.9355	-0.632156	2.38327
0.25	-61.4014	-62.0728	-62.2864	-63.0493	-62.1643							0.25	-58.5937	-57.5561	-57.8918	-58.2581					0.25	-51.6052	-51.2085	-51.1169	-51.0559							0.2	-2.06357	0.501358	-3.53859	2.43414	0.726608	-0.632156	4.21432
0.3	-61.2793	-62.3779	-62.1948	-63.0188	-62.3779							0.3	-58.5022	-57.5561	-58.0749	-58.3191					0.3	-51.4832	-51.4526	-51.4526	-51.3306							0.25	-0.232513	1.41688	-3.53859	-3.97455	1.64214	0.588547	3.2988
0.35	-61.5234	-62.3779	-62.0728	-62.9272	-62.439							0.35	-58.4106	-57.2815	-58.0749	-57.9834					0.35	-51.5137	-51.1169	-51.4526	-51.3916							0.3	-0.842865	2.02724	-2.62306	-1.83832	-2.9355	2.11443	1.16257
0.4	-61.4929	-62.2253	-61.9812	-62.9272	-62.0117							0.4	-58.5022	-57.3425	-57.8613	-58.3496					0.4	-51.3611	-51.239	-51.4832	-51.3							0.35	0.377838	4.46864	-1.70754	0.603088	-2.63033	-0.632156	4.21432
0.45	-61.4624	-62.3474	-62.3474	-63.1409	-62.5305							0.45	-58.6243	-57.4951	-57.8308	-58.136					0.45	-51.2085	-51.3611	-51.2085	-51.3							0.4	2.81924	3.55312	0.733871	-4.5849	0.116257	-1.85286	1.16257
0.5	-61.2488	-62.439	-62.3779	-63.0188	-62.3779							0.5	-58.5327	-57.4951	-58.197	-58.136					0.5	-51.3611	-51.178	-51.3611	-51.2085							0.45	4.03995	4.16347	1.6494	-2.75385	3.47319	-1.54768	1.16257
0.55	-61.615	-62.439	-62.2253	-62.9272	-62.0422							0.55	-58.5022	-57.312	-58.0749	-58.136					0.55	-51.4832	-51.2085	-51.4221	-51.1169							0.5	1.29337	1.41688	-0.181656	1.21344	-0.188919	0.283371	6.04538
0.6	-61.4929	-62.1033	-62.1948	-62.9272	-62.439							0.6	-58.3191	-57.2205	-57.8613	-58.2886					0.6	-51.5747	-51.3	-51.3916	-51.2695							0.55	-0.232513	1.41688	-2.31789	-2.75385	-2.01997	2.72478	1.16257
0.65	-61.2183	-62.4084	-62.1338	-63.0798	-62.4695							0.65	-58.5327	-57.6477	-57.7393	-58.2275					0.65	-51.4221	-51.1169	-51.2695	-51.4526							0.6	-1.14804	1.11171	-2.92824	-0.312439	-0.799271	0.588547	2.07809
0.7	-61.6455	-62.3779	-62.1948	-63.0493	-62.1338							0.7	-58.5937	-57.5256	-58.136	-58.0749					0.7	-51.4221	-51.0559	-51.1475	-51.3611							0.65	0.377838	0.806534	-1.40236	2.43414	3.16802	-1.24251	5.12985
0.75	-61.5234	-62.2864	-62.2864	-62.8967	-62.3779							0.75	-58.5937	-57.4036	-58.136	-58.2275					0.75	-51.3916	-51.3611	-51.5137	-51.239							0.7	-0.842865	-1.3297	-0.792007	-1.53314	1.94731	0.588547	1.46774
0.8	-61.2488	-62.1033	-62.3169	-63.1714	-62.439							0.8	-58.4412	-57.1899	-57.9224	-58.3191					0.8	-51.1475	-51.1475	-51.3306	-51.3							0.75	0.98819	0.196182	0.733871	0.603088	-1.10445	2.11443	2.68845
0.85	-61.5845	-62.4695	-62.2864	-62.9883	-62.3779							0.85	-58.2275	-57.5256	-57.7087	-58.136					0.85	-51.239	-50.9644	-51.3	-51.239							0.8	-2.06357	0.806534	1.03905	3.96002	-0.799271	4.25066	6.35055
0.9	-61.4929	-62.439	-62.2559	-62.8052	-62.2253							0.9	-58.6548	-57.5561	-58.0749	-58.0139					0.9	-51.2695	-51.3306	-51.1475	-50.9949							0.85	-2.36874	-0.108994	-0.792007	-0.617615	0.116257	2.11443	2.68845
0.95	-61.5845	-62.2253	-62.0728	-63.2324	-62.5							0.95	-58.7158	-57.4341	-58.1665	-58.2886					0.95	-51.4526	-51.239	-51.4832	-51.0864							0.9	-2.67392	-0.108994	-1.40236	-0.007263	2.55766	0.893723	2.99362
1	-61.5234	-62.2253	-62.1033	-62.9883	-62.4084							1	-58.5632	-57.3425	-58.0139	-58.197					1	-51.4526	-50.9033	-51.3916	-51.3306							0.95	0.98819	-0.719345	0.428696	3.04449	-0.799271	2.11443	8.18161
1.05	-61.2183	-62.5305	-62.3779	-62.9578	-62.2253							1.05	-58.4412	-57.4036	-57.8613	-58.1055					1.05	-51.3306	-51.239	-51.3611	-51.3306							1	-1.75839	1.11171	1.03905	-0.007263	-1.40962	2.4196	4.82468
1.1	-61.6455	-62.5	-62.4084	-63.1714	-62.439							1.1	-58.3801	-57.6477	-57.9529	-58.1055					1.1	-51.3	-51.178	-51.2695	-51.239							1.05	-2.9791	1.72206	3.17528	-1.83832	-0.799271	5.16618	5.12985
1.15	-61.4929	-62.1948	-62.1643	-62.8662	-62.4695							1.15	-58.7463	-57.4341	-58.136	-58.3191					1.15	-51.239	-51.1169	-51.2085	-51.3							1.1	-0.537689	2.02724	3.78563	0.297913	0.421432	4.25066	7.57126
1.2	-61.4319	-62.1643	-62.1948	-63.1409	-62.2253							1.2	-58.6548	-57.4646	-57.9834	-58.3191					1.2	-51.2085	-51.178	-51.4221	-51.3							1.15	-1.14804	1.72206	1.95457	-0.312439	2.86284	1.50407	8.18161
1.25	-61.4319	-62.5305	-62.0728	-63.0493	-62.5							1.25	-58.5937	-57.2815	-57.9224	-58.1665					1.25	-51.0559	-51.2695	-51.4526	-51.1475							1.2	-1.45322	1.72206	2.25975	-2.14349	-0.188919	0.588547	5.43503
1.3	-61.2488	-62.5	-62.0117	-62.8967	-62.3779							1.3	-58.4717	-57.6172	-57.7698	-58.1055					1.3	-51.0864	-51.3306	-51.4221	-51.0559							1.25	0.683014	1.72206	3.78563	-1.53314	-1.7148	0.283371	5.7402
1.35	-61.6455	-62.1338	-62.1338	-63.1714	-62.4084							1.35	-58.3801	-57.6782	-58.0749	-58.3191					1.35	-51.239	-50.9949	-51.2695	-51.1169							1.3	-1.14804	-0.414169	4.39598	1.21344	-1.7148	2.11443	8.18161
1.4	-61.4929	-62.2864	-62.2864	-63.0188	-62.3169							1.4	-58.6853	-57.5561	-58.0749	-58.2581					1.4	-51.3306	-51.3306	-51.3306	-51.4526							1.35	-3.28427	-1.63487	1.03905	-1.22797	-0.799271	3.64031	4.21432
1.45	-61.4624	-62.5305	-62.2253	-63.1103	-62.561							1.45	-58.5937	-57.5867	-57.9834	-58.2275					1.45	-51.4221	-51.2085	-51.4832	-51.3916							1.4	0.377838	-1.3297	0.428696	-0.922791	1.33696	0.283371	3.60397
1.5	-61.5845	-62.4695	-62.2253	-63.1714	-62.439							1.5	-58.5937	-57.4646	-57.9224	-58.1665					1.5	-51.2085	-51.2695	-51.3306	-51.4221							1.45	-2.36874	-0.108994	4.0908	1.82379	-0.799271	-1.54768	5.43503
1.55	-61.3403	-62.1948	-62.2253	-62.8662	-62.2864							1.55	-58.5937	-57.6782	-57.9529	-58.2581					1.55	-51.2085	-51.178	-51.3916	-51.3611							1.5	-3.28427	1.72206	-0.792007	-0.617615	-3.54585	0.283371	5.7402
1.6	-61.6455	-62.2864	-61.9812	-63.2324	-62.439							1.6	-58.4717	-57.7087	-58.0139	-58.3496					1.6	-51.178	-51.3611	-51.239	-51.4221							1.55	1.59854	3.85829	-1.09718	-2.14349	-2.63033	3.64031	2.68845
1.65	-61.4929	-62.5	-62.0117	-63.0188	-62.4084							1.65	-58.5327	-57.7087	-58.0444	-58.1665					1.65	-50.9949	-51.239	-51.178	-51.3							1.6	-3.58945	0.501358	1.95457	-1.22797	-0.494095	0.588547	5.12985
1.7	-61.4319	-62.439	-62.1948	-63.1714	-62.3779							1.7	-58.5937	-57.7698	-58.0139	-58.1055					1.7	-51.2085	-51.1475	-51.4526	-51.2085							1.65	-2.06357	-1.63487	-1.70754	3.04449	1.94731	0.283371	7.57126
1.75	-61.5234	-62.2864	-62.3169	-63.0798	-62.2253							1.75	-58.6243	-57.4951	-57.9224	-58.2581					1.75	-51.2695	-51.3	-51.3916	-51.178							1.7	0.072662	-0.719345	-0.181656	-1.83832	-0.188919	2.72478	5.43503
1.8	-61.4929	-62.1643	-62.1948	-62.8662	-62.4695							1.8	-58.6243	-57.8003	-57.7393	-58.2275					1.8	-51.2085	-51.2695	-51.4526	-51.5137							1.75	-4.1998	1.11171	2.8701	-1.22797	-2.01997	3.94548	4.82468
1.85	-61.554	-62.561	-62.1643	-63.2019	-62.439							1.85	-58.4412	-57.9834	-57.9529	-58.2275					1.85	-51.0864	-51.2695	-51.1475	-51.5137							1.8	-1.45322	1.41688	-2.01271	2.43414	-0.799271	0.588547	6.35055
1.9	-61.4929	-62.4695	-62.1338	-63.2324	-62.3474							1.9	-58.3801	-57.9529	-58.0139	-58.0749					1.9	-50.9644	-51.0254	-51.178	-51.4221							1.85	-4.1998	-0.719345	0.733871	2.12897	-2.32515	2.72478	8.18161
1.95	-61.3098	-62.3474	-62.0728	-62.9272	-62.2559							1.95	-58.7158	-57.7393	-58.0139	-58.2275					1.95	-51.2085	-51.3611	-51.3611	-51.4221							1.9	-5.11533	-0.719345	-0.181656	-0.922791	0.726608	4.25066	3.60397
2	-61.5845	-62.1338	-61.9202	-63.2324	-62.4695							2	-58.7463	-57.5867	-57.8308	-58.3496					2	-51.3306	-51.178	-51.3611	-51.3611							1.95	-1.75839	2.33241	-2.01271	-0.922791	0.726608	1.50407	4.82468
2.05	-61.554	-62.5	-62.0117	-63.1714	-62.4084							2.05	-58.5327	-57.9224	-57.7087	-58.2886					2.05	-50.9949	-51.1169	-51.3306	-51.239							2	-5.72568	-1.3297	1.95457	4.2652	-2.32515	4.55583	6.35055
2.1	-61.3098	-62.5305	-62.1033	-62.9272	-62.2559							2.1	-58.6243	-58.0139	-58.0139	-58.1665					2.1	-51.0559	-51.0254	-51.0559	-51.4526							2.05	-2.36874	-1.02452	-4.14894	0.603088	-2.9355	2.72478	7.57126
2.15	-61.5845	-62.439	-62.3169	-63.324	-62.3779							2.15	-58.5327	-57.9529	-58.0749	-58.1055					2.15	-51.2085	-51.3	-50.9644	-51.4221							2.1	-1.75839	0.196182	-0.792007	-1.22797	-1.40962	1.1989	3.60397
2.2	-61.4319	-62.2253	-62.1033	-63.1103	-62.4695							2.2	-58.4717	-57.9224	-57.8613	-58.2581					2.2	-51.239	-51.178	-51.1475	-51.3916							2.15	-5.11533	-0.108994	-1.09718	-0.617615	1.33696	5.77653	5.12985
2.25	-61.2793	-62.3474	-62.1643	-62.9883	-62.439							2.25	-58.6243	-57.8003	-57.8308	-58.197					2.25	-50.9644	-51.0864	-51.2695	-51.3							2.2	-2.9791	-4.07628	-3.53859	4.2652	2.25249	0.283371	8.18161
2.3	-61.554	-62.5305	-62.1338	-63.3545	-62.1643							2.3	-58.6853	-57.8003	-57.7087	-58.1665					2.3	-51.2695	-51.0254	-51.1475	-51.5137							2.25	-2.9791	-0.719345	1.03905	0.297913	1.64214	3.02995	9.09714
2.35	-61.4929	-62.4695	-61.8591	-63.2019	-62.3779							2.35	-58.7158	-58.0139	-57.9224	-58.0139					2.35	-51.1475	-51.3306	-51.1475	-51.4832							2.3	-5.11533	0.806534	-3.84376	-0.922791	-2.01997	-0.632156	6.35055
2.4	-61.2793	-62.439	-62.1033	-62.8967	-62.4695							2.4	-58.5937	-57.9224	-57.9834	-58.2581					2.4	-51.0559	-51.178	-50.9644	-51.2695							2.35	-2.36874	-3.16075	0.428696	0.603088	-2.32515	-0.937332	6.04538
2.45	-61.554	-62.2864	-62.1948	-63.324	-62.3474							2.45	-58.5937	-58.0139	-57.8308	-58.2581					2.45	-51.239	-51.0864	-50.9644	-51.4832							2.4	-4.81015	-1.3297	-0.486832	3.34967	-2.63033	2.11443	8.79196
2.5	-61.4929	-62.561	-62.1948	-63.2324	-62.2559							2.5	-58.3801	-57.9834	-57.9224	-58.197					2.5	-50.9949	-50.9949	-51.239	-51.4526							2.45	-5.4205	0.501358	-0.486832	-0.312439	-1.10445	-1.54768	10.623
2.55	-61.3098	-62.561	-62.1033	-63.0493	-62.4084							2.55	-58.6243	-57.7698	-57.8613	-58.1055					2.55	-51.178	-51.2695	-51.178	-51.178							2.5	-1.45322	-2.5504	4.0908	-1.53314	1.33696	3.02995	7.26608
2.6	-61.5234	-62.4695	-61.8896	-63.2019	-62.4695							2.6	-58.7769	-57.9529	-57.6782	-57.9834					2.6	-51.2085	-51.2695	-51.1169	-51.4526							2.55	-3.58945	-1.94005	-0.181656	-0.617615	-0.188919	-2.76839	7.26608
2.65	-61.4929	-62.2864	-62.1643	-63.1714	-62.439							2.65	-58.6243	-58.136	-57.9529	-58.197					2.65	-50.9949	-51.1475	-51.0864	-51.3916							2.6	-3.89462	-0.414169	4.39598	1.82379	-3.54585	2.11443	9.70749
2.7	-61.3403	-62.4084	-62.1948	-63.1103	-62.1643							2.7	-58.6243	-58.0749	-57.9834	-58.2581					2.7	-51.178	-50.9033	-50.9033	-51.1169							2.65	-0.842865	-3.7711	2.25975	-2.44867	-3.85103	-1.85286	12.1489
2.75	-61.5234	-62.561	-62.0117	-63.1409	-62.3779							2.75	-58.5937	-58.0139	-57.9224	-58.1665					2.75	-51.178	-51.2695	-50.8728	-51.4832							2.7	-0.842865	-1.94005	1.03905	-3.3642	-2.32515	0.283371	7.57126
2.8	-61.554	-62.4695	-62.1033	-63.1409	-62.4695							2.8	-58.3496	-57.8918	-57.8613	-58.0444					2.8	-51.0559	-51.239	-51.2085	-51.4526							2.75	-3.58945	2.33241	4.39598	-1.53314	-1.40962	0.283371	6.96091
2.85	-61.4014	-62.5	-62.1948	-63.0493	-62.439							2.85	-58.3801	-57.8613	-57.8003	-58.0139					2.85	-51.2695	-51.178	-51.178	-51.2085							2.8	-0.842865	-2.85558	-0.486832	2.12897	0.116257	-0.021805	8.48679
2.9	-61.2183	-62.3779	-62.1338	-62.9883	-62.1338							2.9	-58.5937	-58.0444	-57.7087	-58.3191					2.9	-51.0254	-50.9644	-51.0864	-51.5747							2.85	0.98819	-1.02452	-0.486832	-1.53314	0.421432	3.33513	9.70749
2.95	-61.676	-62.3779	-61.9812	-63.2935	-62.3779							2.95	-58.7463	-58.1055	-58.0444	-58.197					2.95	-51.178	-51.239	-51.0559	-51.3							2.9	-2.9791	2.33241	2.56493	-0.922791	-1.7148	-0.021805	5.43503
3	-61.5234	-62.6526	-62.1338	-63.2324	-62.439							3	-58.6548	-58.0749	-57.9529	-58.136					3	-51.2085	-51.3306	-51.1169	-51.4221							2.95	-1.45322	-0.719345	-1.40236	-0.007263	-3.24068	4.25066	3.2988
3.05	-61.2488	-62.5	-61.9507	-62.8967	-62.5							3.05	-58.5022	-58.0749	-57.8308	-58.0444					3.05	-51.0254	-51.2085	-50.8423	-51.4526							3	2.51407	-1.94005	1.34422	4.57037	-3.24068	-1.24251	3.90915
3.1	-61.4014	-62.6526	-62.1338	-63.2019	-62.2864							3.1	-58.5022	-58.0749	-57.9834	-58.0749					3.1	-51.3	-51.0864	-51.0254	-51.1169							3.05	-0.232513	1.41688	3.17528	2.12897	-3.54585	1.80925	6.65573
3.15	-61.5234	-62.3169	-62.1338	-63.1409	-62.2559							3.15	-58.4717	-57.8308	-57.8613	-58.2886					3.15	-51.1169	-51.0864	-51.1169	-51.5137							3.1	-1.14804	2.33241	-0.486832	0.297913	-2.63033	-0.632156	5.7402
3.2	-61.4319	-62.4084	-61.8591	-63.0493	-62.5							3.2	-58.2886	-57.8003	-57.5867	-58.3496					3.2	-51.1169	-51.3	-51.239	-51.3916							3.15	1.90372	-0.108994	1.95457	1.21344	-0.494095	-1.54768	1.77292
3.25	-61.3098	-62.6831	-62.2253	-62.8967	-62.4695							3.25	-58.4412	-58.136	-57.8918	-58.2581					3.25	-51.2695	-51.2085	-51.239	-51.3306							3.2	1.29337	1.11171	3.78563	3.34967	-0.494095	2.72478	3.60397
3.3	-61.4929	-62.6526	-62.1643	-63.2324	-62.3169							3.3	-58.6243	-58.1665	-58.0444	-58.2275					3.3	-51.1475	-51.0864	-51.0864	-51.4221							3.25	-2.06357	4.46864	-0.792007	2.73932	-3.24068	-1.85286	5.43503
3.35	-61.5234	-62.5915	-61.8896	-63.1409	-62.1643							3.35	-58.6853	-58.0139	-57.9834	-58.0444					3.35	-51.2085	-51.1169	-50.9949	-51.2695							3.3	-1.75839	3.55312	1.34422	-0.007263	-4.76656	1.50407	6.35055
3.4	-61.1877	-62.4695	-62.1338	-62.9578	-62.5							3.4	-58.4717	-58.0444	-57.8613	-58.2886					3.4	-51.2085	-51.239	-50.9338	-51.5137							3.35	1.90372	1.11171	3.48045	0.297913	-4.76656	-0.632156	3.2988
3.45	-61.554	-62.439	-61.9507	-63.0493	-62.5							3.45	-58.4717	-58.0139	-57.8613	-58.3496					3.45	-51.0864	-51.3	-51.239	-51.5747							3.4	-2.36874	1.72206	-0.486832	1.51862	-3.24068	-0.632156	2.68845
3.5	-61.4929	-62.6831	-62.3169	-63.2019	-62.3779							3.5	-58.4717	-57.8308	-57.8308	-58.3801					3.5	-51.178	-51.2085	-51.2695	-51.178							3.45	-2.9791	3.24794	0.428696	3.04449	-4.46138	4.55583	2.68845
3.55	-61.4319	-62.7136	-62.1643	-63.1103	-62.2253							3.55	-58.4412	-57.7393	-57.9224	-58.2581					3.55	-51.2085	-51.178	-51.239	-51.5137							3.5	-0.232513	1.11171	3.17528	-0.922791	-2.63033	-0.326981	5.7402
3.6	-61.4319	-62.5915	-61.8896	-62.7747	-62.2559							3.6	-58.1665	-58.0444	-57.8918	-58.2275					3.6	-51.0864	-51.0864	-51.2085	-51.4832							3.55	1.90372	-0.108994	-2.01271	-1.53314	-2.32515	2.11443	6.65573
3.65	-61.4929	-62.5	-62.1948	-63.2019	-62.5305							3.65	-58.4717	-58.1055	-58.0139	-58.197					3.65	-51.178	-51.2695	-51.3	-51.239							3.6	-2.9791	1.11171	-0.486832	-0.007263	-4.1562	2.72478	3.60397
3.7	-61.4319	-62.439	-62.0117	-62.9883	-62.439							3.7	-58.5937	-58.1665	-58.0139	-58.4412					3.7	-51.3	-51.2695	-51.0864	-51.6968							3.65	-2.67392	3.85829	3.17528	2.43414	-7.51314	0.588547	3.90915
3.75	-61.2488	-62.5915	-62.2253	-63.0188	-62.3169							3.75	-58.6548	-58.0444	-58.0444	-58.4106					3.75	-51.178	-51.2695	-50.9949	-51.4832							3.7	1.59854	0.501358	-1.70754	1.51862	-9.03902	3.94548	5.12985
3.8	-61.554	-62.6831	-62.1033	-62.8967	-62.1338							3.8	-58.5937	-58.0139	-57.8918	-58.3496					3.8	-51.0559	-51.0559	-51.1475	-51.3306							3.75	0.683014	0.501358	-1.09718	-2.14349	-6.90279	0.283371	7.87643
3.85	-61.4624	-62.561	-61.8591	-63.1103	-62.3169							3.85	-58.4412	-57.9529	-57.8003	-58.2581					3.85	-51.3611	-51.0254	-51.3916	-51.7273							3.8	-3.28427	1.41688	1.6494	-0.007263	-5.98726	-0.632156	6.35055
3.9	-61.4319	-62.6831	-62.2253	-63.0493	-62.4695							3.9	-58.4412	-57.9834	-57.7393	-58.1055					3.9	-51.239	-51.3	-51.3306	-51.6357							3.85	-2.06357	4.16347	0.12352	1.82379	-4.76656	4.25066	2.38327
3.95	-61.3098	-62.5305	-62.1643	-62.8662	-62.3169							3.95	-58.3496	-57.9529	-57.9834	-58.2886					3.95	-50.9644	-51.3	-51.3	-51.2695							3.9	0.98819	1.72206	-2.31789	3.96002	-2.63033	-0.021805	2.38327
4	-61.615	-62.3169	-61.8896	-62.9883	-62.2864							4	-58.3191	-58.1665	-58.0749	-58.4412					4	-51.3	-51.2695	-51.2695	-51.6968							3.95	-1.14804	0.196182	0.733871	0.297913	-1.10445	0.893723	2.99362
4.05	-61.4929	-62.5915	-62.1338	-63.0493	-62.1033							4.05	-58.5937	-58.1665	-58.1665	-58.3496					4.05	-51.2695	-50.9338	-51.2085	-51.6052							4	-3.28427	1.41688	1.34422	-1.83832	-3.54585	6.08171	5.43503
4.1	-61.3403	-62.7136	-61.9507	-63.0188	-62.439							4.1	-58.5022	-58.136	-58.0444	-58.3496					4.1	-51.1169	-51.1475	-51.239	-51.4221							4.05	-2.06357	2.63759	-1.70754	-0.617615	-5.98726	1.50407	5.43503
4.15	-61.3098	-62.7441	-62.1033	-62.8357	-62.439							4.15	-58.5022	-58.0444	-58.197	-58.3191					4.15	-51.178	-51.2695	-51.0864	-51.5442							4.1	0.683014	2.94276	-0.792007	0.603088	-4.46138	3.94548	2.07809
4.2	-61.5845	-62.5915	-62.0117	-63.0188	-62.4084							4.2	-58.2886	-58.0139	-57.9834	-58.0749					4.2	-51.3611	-51.3	-51.1475	-51.6357							4.15	-1.75839	-0.719345	1.95457	2.43414	-3.85103	6.99724	0.857391
4.25	-61.5234	-62.4695	-61.9202	-63.1103	-62.2559							4.25	-58.4106	-57.9834	-57.9834	-58.1055					4.25	-51.2085	-51.3	-51.3306	-51.5747							4.2	-1.45322	-0.719345	-0.486832	-0.617615	-0.188919	2.72478	2.38327
4.3	-61.3098	-62.3474	-62.0422	-63.0493	-62.2253							4.3	-58.5632	-57.9529	-57.8613	-58.3496					4.3	-51.0559	-51.0559	-51.4526	-51.4832							4.25	-0.842865	-0.414169	-0.792007	-1.83832	-5.37691	4.25066	5.43503
4.35	-61.4014	-62.5915	-62.1033	-62.8357	-62.3474							4.35	-58.5937	-57.9224	-58.0749	-58.3496					4.35	-51.3306	-51.0559	-51.4221	-51.6357							4.3	3.12442	2.02724	1.6494	-1.22797	-5.98726	5.47136	7.57126
4.4	-61.615	-62.6526	-61.8896	-63.0188	-62.4695							4.4	-58.197	-58.136	-58.0139	-58.2581					4.4	-51.239	-51.3	-51.3611	-51.5747							4.35	0.98819	-0.108994	1.34422	0.603088	-4.1562	0.893723	3.90915
4.45	-61.4624	-62.7136	-61.9812	-63.1409	-62.3779							4.45	-58.6548	-58.1665	-58.136	-58.197					4.45	-51.1169	-51.3306	-51.3	-51.3916							4.4	-0.232513	-1.63487	-1.40236	1.51862	-1.10445	1.80925	2.38327
4.5	-61.1877	-62.6526	-62.0728	-63.0798	-62.3474							4.5	-58.5022	-58.0749	-58.197	-58.197					4.5	-51.3	-51.2085	-51.178	-51.6052							4.45	0.072662	-1.02452	-0.792007	-0.007263	-4.76656	2.11443	4.21432
4.55	-61.4014	-62.6831	-61.9812	-62.9272	-62.1033							4.55	-58.3496	-57.9834	-58.1055	-58.0444					4.55	-51.3306	-51.1169	-51.4221	-51.6663							4.5	4.03995	1.72206	1.34422	-2.14349	-4.76656	-0.326981	6.04538
4.6	-61.4929	-62.561	-61.9812	-62.9883	-62.1338							4.6	-58.5632	-57.9224	-58.0444	-58.1665					4.6	-51.178	-50.9644	-51.3916	-51.4832							4.55	0.98819	5.07899	-3.23341	-0.617615	-0.799271	2.72478	7.87643
4.65	-61.4929	-62.4084	-62.0422	-63.1103	-62.4695							4.65	-58.4717	-57.9529	-58.0749	-58.1665					4.65	-51.0559	-51.178	-51.4221	-51.4221							4.6	-1.75839	2.02724	-2.31789	-0.312439	-3.54585	2.11443	7.57126
4.7	-61.1572	-62.5915	-62.0117	-62.9883	-62.439							4.7	-58.3496	-58.197	-58.0749	-58.2581					4.7	-51.3611	-51.2695	-51.178	-51.6052							4.65	-0.232513	0.806534	0.12352	1.21344	-2.9355	0.588547	5.7402
4.75	-61.2793	-62.7747	-61.8286	-62.9883	-62.2864							4.75	-58.6243	-57.9834	-57.9529	-58.197					4.75	-51.3306	-51.178	-51.3306	-51.6357							4.7	2.20889	1.72206	-0.181656	0.603088	0.116257	4.25066	6.04538
4.8	-61.4624	-62.6526	-62.1033	-62.9272	-62.1948							4.8	-58.4717	-57.9224	-58.0139	-58.197					4.8	-51.1169	-51.3306	-51.4832	-51.3							4.75	3.4296	3.85829	-2.62306	-1.83832	-2.63033	4.86101	6.96091
4.85	-61.4624	-62.6526	-62.0422	-63.2324	-62.1643							4.85	-58.2581	-57.8308	-58.2275	-58.0139					4.85	-51.0864	-51.1169	-51.4221	-51.6052							4.8	-0.842865	4.77382	-1.70754	-1.53314	-2.01997	0.893723	8.18161
4.9	-61.2793	-62.5915	-61.7676	-63.0798	-62.3474							4.9	-58.5327	-58.1055	-58.2581	-57.9224					4.9	-51.3306	-50.9949	-51.239	-51.5442							4.85	-0.232513	0.806534	1.6494	-0.312439	3.77837	2.72478	10.623
4.95	-61.2793	-62.4695	-62.1338	-63.0188	-62.3779							4.95	-58.4717	-58.0139	-58.2275	-58.136					4.95	-51.3	-51.2085	-51.5137	-51.5747							4.9	1.29337	0.196182	-0.792007	1.82379	-1.7148	3.33513	8.18161
5	-61.4624	-62.5915	-62.1338	-62.8357	-62.2559							5	-58.3496	-57.8613	-58.136	-58.3191					5	-51.0864	-51.3611	-51.3916	-51.3							4.95	3.73477	0.196182	-2.01271	3.96002	-0.494095	-0.326981	6.96091
5.05	-61.4929	-62.7441	-61.9202	-63.2019	-62.2864							5.05	-58.4717	-58.1055	-57.9834	-58.2275					5.05	-51.239	-51.3306	-51.2695	-51.4832							5	0.072662	2.63759	0.733871	1.21344	2.55766	0.588547	6.65573
5.1	-61.2488	-62.6526	-62.0117	-63.0493	-62.1033							5.1	-58.2581	-58.0749	-58.136	-58.136					5.1	-51.4832	-51.3306	-51.5747	-51.6663							5.05	-1.14804	3.55312	1.95457	-1.53314	-1.10445	2.4196	6.96091
5.15	-61.0962	-62.6831	-62.0728	-63.0798	-62.1338							5.15	-58.6548	-57.8003	-58.3496	-58.1665					5.15	-51.3611	-51.2085	-51.4221	-51.3611							5.1	-0.232513	-0.108994	-1.40236	-0.617615	2.86284	-1.85286	8.48679
5.2	-61.4319	-62.3779	-62.0728	-62.9272	-62.3169							5.2	-58.4412	-58.0444	-58.197	-58.0749					5.2	-51.0559	-51.0559	-51.3306	-51.3611							5.15	3.4296	-1.02452	-1.40236	0.297913	-2.01997	-0.021805	11.5385
5.25	-61.4014	-62.6221	-61.7981	-63.0798	-62.3779							5.25	-58.2886	-58.0444	-58.0139	-57.8918					5.25	-51.239	-51.2085	-51.5747	-51.5747							5.2	1.29337	-0.414169	1.95457	0.603088	0.726608	3.64031	7.87643
5.3	-61.3708	-62.6831	-62.2253	-63.1409	-62.1948							5.3	-58.5022	-57.8003	-58.197	-57.9529					5.3	-51.4526	-51.3306	-51.4221	-51.5747							5.25	-0.842865	3.24794	1.95457	2.12897	3.47319	-0.632156	5.7402
5.35	-61.0352	-62.6221	-62.1643	-63.1409	-62.2559							5.35	-58.4106	-58.0444	-58.2886	-58.0749					5.35	-51.3916	-51.3	-51.5137	-51.3306							5.3	-0.232513	3.55312	-1.09718	0.603088	-0.799271	-0.326981	4.82468
5.4	-61.3403	-62.3779	-61.9812	-63.1103	-62.1643							5.4	-58.4412	-57.9834	-58.1665	-58.197					5.4	-51.1475	-51.3916	-51.4526	-51.5137							5.35	1.59854	2.02724	-1.40236	-1.53314	3.16802	4.55583	4.5195
5.45	-61.4319	-62.7136	-62.0422	-62.8662	-62.0728							5.45	-58.3801	-57.9224	-58.0139	-58.1665					5.45	-51.3306	-51.239	-51.178	-51.6052							5.4	3.73477	-0.719345	2.25975	-1.53314	0.726608	1.1989	4.21432
5.5	-61.4319	-62.6221	-62.1033	-63.2019	-62.3474							5.5	-58.1055	-58.1055	-58.4106	-58.136					5.5	-51.4526	-51.0254	-51.6052	-51.6052							5.45	0.683014	1.11171	3.17528	-1.53314	1.33696	0.588547	5.7402
5.55	-61.2488	-62.4084	-62.0117	-63.1409	-62.4084							5.55	-58.5022	-57.8613	-58.2275	-58.1055					5.55	-51.4221	-51.0864	-51.4221	-51.3306							5.5	-0.842865	0.196182	-0.486832	1.21344	5.9146	3.64031	7.87643
5.6	-61.2793	-62.7136	-61.8896	-63.0798	-62.3474							5.6	-58.3191	-58.1055	-57.9529	-58.136					5.6	-51.2085	-51.3611	-51.3306	-51.4526							5.55	-0.537689	2.94276	0.733871	2.73932	1.03178	1.80925	4.82468
5.65	-61.4319	-62.6526	-62.1338	-62.8357	-62.2253							5.65	-58.1055	-57.9834	-58.2581	-58.0139					5.65	-51.3611	-51.4526	-51.4526	-51.6663							5.6	2.81924	3.24794	3.17528	0.908264	2.55766	-0.326981	2.68845
5.7	-61.3403	-62.3779	-62.0728	-62.9272	-62.2864							5.7	-58.5327	-57.8003	-58.2275	-57.8918					5.7	-51.5442	-51.3306	-51.2085	-51.5442							5.65	3.4296	-0.414169	4.0908	-1.53314	3.47319	1.1989	2.38327
5.75	-61.2793	-62.7441	-61.9507	-63.1409	-62.1033							5.75	-58.4412	-58.0139	-58.1055	-57.8918					5.75	-51.4526	-51.3611	-51.5442	-51.3611							5.7	-0.537689	0.196182	1.03905	-1.22797	1.03178	2.72478	4.21432
5.8	-61.1877	-62.5305	-61.9812	-63.2324	-62.1643							5.8	-58.136	-57.8613	-58.2581	-58.0749					5.8	-51.3	-51.3	-51.4221	-51.4526							5.75	-0.232513	1.11171	1.03905	-0.617615	2.86284	-1.54768	4.82468
5.85	-61.2183	-62.5915	-62.1643	-63.0188	-62.3169							5.85	-58.4106	-58.0139	-58.1055	-58.0444					5.85	-51.2695	-51.2085	-51.2085	-51.6052							5.8	0.377838	3.55312	3.17528	0.297913	2.55766	-1.54768	5.43503
5.9	-61.4014	-62.5915	-62.1338	-62.8357	-62.4084							5.9	-58.3191	-57.9834	-58.2581	-58.136					5.9	-51.6052	-51.178	-51.5747	-51.5747							5.85	1.59854	5.99452	4.39598	0.297913	0.421432	2.4196	7.26608
5.95	-61.4319	-62.4695	-61.8896	-62.8967	-62.2864							5.95	-58.1055	-57.6782	-58.197	-58.1055					5.95	-51.5137	-51.3306	-51.4526	-51.3306							5.9	1.29337	3.55312	1.03905	0.908264	4.08354	-2.15803	5.7402
6	-61.3403	-62.6526	-62.0422	-63.2019	-62.3169							6	-58.4106	-57.9834	-57.9529	-58.0444					6	-51.4221	-51.5137	-51.4221	-51.3916							5.95	-1.14804	0.501358	0.733871	-1.22797	2.25249	-1.54768	4.5195
6.05	-61.0962	-62.6221	-62.1643	-63.0188	-62.2559							6.05	-58.3191	-57.9834	-58.2886	-58.0444					6.05	-51.3306	-51.4526	-51.4526	-51.5442							6	-0.842865	0.501358	3.48045	-2.44867	1.94731	1.50407	3.2988
6.1	-61.3403	-62.5	-62.0422	-63.0188	-62.1948							6.1	-58.0444	-57.7698	-58.3496	-57.9529					6.1	-51.6663	-51.3306	-51.3306	-51.5747							6.05	-0.232513	1.11171	3.48045	-3.05902	3.77837	0.588547	5.43503
6.15	-61.4014	-62.7136	-61.9507	-62.8052	-62.1338							6.15	-58.3801	-58.0444	-58.1055	-57.8918					6.15	-51.5442	-51.3306	-51.5747	-51.3916							6.1	0.98819	0.806534	0.428696	-2.44867	3.47319	-2.15803	4.5195
6.2	-61.4624	-62.3169	-62.1643	-62.8662	-62.3779							6.2	-58.2275	-57.8613	-58.2581	-57.8918					6.2	-51.5442	-51.3306	-51.4221	-51.2695							6.15	3.12442	2.94276	1.03905	-1.83832	0.726608	0.283371	6.35055
6.25	-61.3403	-62.6526	-62.1643	-63.0798	-62.439							6.25	-58.2275	-57.8918	-58.1665	-58.1055					6.25	-51.3916	-51.1475	-51.3	-51.4832							6.2	-0.537689	2.33241	2.25975	0.603088	2.86284	4.86101	8.18161
6.3	-61.1572	-62.439	-62.0728	-62.9883	-62.439							6.3	-58.2275	-57.9834	-58.4106	-58.1665					6.3	-51.5442	-51.3306	-51.6052	-51.4221							6.25	-0.537689	0.806534	4.0908	-0.007263	4.38872	-0.021805	6.96091
6.35	-61.2183	-62.6831	-62.0117	-63.0188	-62.4084							6.35	-58.2886	-57.8613	-58.3191	-58.136					6.35	-51.7273	-51.3916	-51.4526	-51.4221							6.3	-0.842865	-0.108994	2.25975	-1.53314	-0.799271	-0.632156	5.43503
6.4	-61.554	-62.6831	-62.1643	-62.8662	-62.2864							6.4	-58.197	-57.8308	-58.136	-58.1055					6.4	-51.4832	-51.5442	-51.4526	-51.2695							6.35	-0.842865	1.11171	-0.181656	-4.89008	1.64214	3.02995	2.68845
6.45	-61.4014	-62.3779	-62.1033	-62.8052	-62.2864							6.45	-58.0749	-58.0749	-58.4717	-57.8918					6.45	-51.4832	-51.4221	-51.4832	-51.4832							6.4	2.20889	1.72206	-0.486832	-4.89008	4.08354	1.80925	2.99362
6.5	-61.3098	-62.7136	-62.0422	-62.9272	-62.1643							6.5	-58.3191	-57.8613	-58.3801	-57.9529					6.5	-51.3916	-51.4526	-51.6052	-51.5442							6.45	0.072662	3.85829	1.6494	-4.89008	-0.188919	-0.937332	1.77292
6.55	-61.1572	-62.6221	-62.0117	-62.9883	-62.3169							6.55	-58.2275	-57.7393	-58.0749	-58.197					6.55	-51.7883	-51.3611	-51.4221	-51.5442							6.5	-1.45322	5.99452	1.6494	-3.3642	0.421432	-0.937332	2.68845
6.6	-61.3098	-62.6526	-62.2253	-62.9272	-62.4084							6.6	-57.9529	-57.9834	-58.5022	-58.0749					6.6	-51.6052	-51.3	-51.5137	-51.2695							6.55	-1.75839	2.94276	-1.40236	-0.312439	3.77837	2.11443	3.2988
6.65	-61.4929	-62.6831	-62.1033	-62.8967	-62.3779							6.65	-58.197	-57.9529	-58.4412	-58.0444					6.65	-51.5442	-51.1169	-51.6357	-51.3306							6.6	-1.14804	0.196182	-2.31789	0.908264	0.116257	-0.937332	4.21432
6.7	-61.4014	-62.3169	-62.1033	-62.7441	-62.4084							6.7	-58.1665	-57.6782	-58.197	-57.9529					6.7	-51.4832	-51.178	-51.6968	-51.6052							6.65	0.98819	-1.3297	-0.792007	2.12897	1.03178	-1.85286	5.7402
6.75	-61.4319	-62.8357	-62.0117	-62.8052	-62.439							6.75	-58.136	-58.0139	-58.5022	-58.197					6.75	-51.4221	-51.3611	-51.3916	-51.5137							6.7	2.20889	-0.719345	1.6494	-0.617615	3.16802	-0.326981	4.5195
6.8	-61.3098	-62.6526	-62.1948	-62.9578	-62.2864							6.8	-57.9834	-57.9834	-58.4106	-58.1055					6.8	-51.6357	-51.4832	-51.7273	-51.4832							6.75	0.072662	0.501358	-0.792007	-0.922791	4.08354	2.11443	4.5195
6.85	-61.1572	-62.4084	-62.1338	-63.0188	-62.1948							6.85	-58.2886	-57.7393	-58.197	-57.7698					6.85	-51.5137	-51.4526	-51.6663	-51.3611							6.8	-1.14804	1.41688	-4.14894	-2.44867	-0.188919	-0.937332	3.2988
6.9	-61.3098	-62.7441	-62.0728	-62.9883	-62.2253							6.9	-58.197	-58.0444	-58.5632	-58.136					6.9	-51.5442	-51.3916	-51.4832	-51.4832							6.85	-1.75839	3.55312	-3.53859	-2.75385	1.03178	-0.326981	3.90915
6.95	-61.4014	-62.6526	-61.9202	-62.8357	-62.5305							6.95	-57.9224	-57.8918	-58.3801	-58.136					6.95	-51.3306	-51.3611	-51.7273	-51.7273							6.9	-0.537689	2.63759	-1.09718	-2.75385	5.30424	0.893723	4.5195
7	-61.3708	-62.561	-62.2253	-62.6831	-62.439							7	-58.1055	-57.7698	-58.3191	-57.7393					7	-51.4832	-51.3	-51.7883	-51.5137							6.95	0.683014	0.196182	1.03905	-0.922791	1.64214	3.02995	5.7402
7.05	-61.4624	-62.7136	-62.1948	-62.8662	-62.3779							7.05	-58.136	-57.8918	-58.4106	-58.136					7.05	-51.6663	-51.2085	-51.6663	-51.4526							7	2.81924	-0.719345	-2.01271	0.908264	0.421432	-0.632156	6.35055
7.1	-61.1267	-62.561	-62.0728	-63.0188	-62.1948							7.1	-58.0444	-57.9529	-58.5022	-58.0444					7.1	-51.6052	-51.3611	-51.6663	-51.2085							7.05	0.377838	1.41688	-3.84376	-1.22797	2.25249	-0.021805	6.96091
7.15	-61.0657	-62.561	-62.0422	-62.9883	-62.3474							7.15	-57.8613	-57.9529	-58.3801	-57.8003					7.15	-51.6052	-51.4832	-51.9714	-51.6357							7.1	-1.75839	1.41688	-1.70754	-3.05902	3.47319	1.1989	6.35055
7.2	-61.4014	-62.7441	-62.1948	-62.9578	-62.4695							7.2	-58.1665	-57.7698	-58.3191	-58.1055					7.2	-51.4526	-51.3611	-51.8494	-51.6052							7.15	-2.06357	1.41688	0.12352	-2.75385	-0.494095	0.893723	7.87643
7.25	-61.5234	-62.5305	-62.1948	-62.8662	-62.3779							7.25	-58.0444	-58.197	-58.5327	-58.0139					7.25	-51.3916	-51.3916	-51.6052	-51.6052							7.2	-1.45322	2.02724	2.25975	-0.922791	-0.188919	-2.46321	6.65573
7.3	-61.2488	-62.6221	-62.1643	-62.6221	-62.1948							7.3	-57.9224	-57.9529	-58.5632	-57.9834					7.3	-51.6052	-51.239	-51.8799	-51.3916							7.25	0.377838	3.55312	0.12352	2.43414	3.77837	-2.15803	4.21432
7.35	-61.2793	-62.7441	-62.1033	-62.7136	-62.4695							7.35	-57.8918	-57.8308	-58.197	-58.136					7.35	-51.6052	-51.5442	-52.063	-51.3							7.3	2.51407	1.72206	-1.40236	0.297913	1.03178	0.588547	1.77292
7.4	-61.2488	-62.6526	-62.0117	-62.9578	-62.3474							7.4	-58.1055	-57.9224	-58.5022	-57.9529					7.4	-51.6357	-51.5442	-51.7883	-51.5137							7.35	0.072662	0.196182	-0.181656	-0.922791	-1.10445	0.588547	0.552216
7.45	-61.1572	-62.4695	-62.1643	-62.9883	-62.1033							7.45	-57.9834	-58.1055	-58.5022	-58.136					7.45	-51.4221	-51.3611	-51.6968	-51.4221							7.4	-2.67392	-0.719345	1.34422	0.908264	0.116257	-1.24251	2.07809
7.5	-61.2793	-62.7441	-62.1033	-62.9272	-62.439							7.5	-57.8918	-57.9529	-58.5022	-57.9834					7.5	-51.3	-51.4526	-52.0019	-51.5137							7.45	-2.36874	0.806534	3.48045	3.96002	2.25249	0.588547	3.90915
7.55	-61.3708	-62.6526	-62.1643	-62.9272	-62.439							7.55	-57.9224	-57.8003	-58.3496	-57.8308					7.55	-51.6357	-51.4526	-52.0325	-51.3611							7.5	-1.14804	2.33241	1.6494	-1.22797	-0.799271	1.80925	5.7402
7.6	-61.4319	-62.5	-61.9507	-62.8967	-62.1643							7.6	-58.1055	-58.0749	-58.6243	-58.136					7.6	-51.6663	-51.3306	-51.7578	-51.178							7.55	-1.45322	3.24794	-0.486832	-1.22797	-1.7148	2.4196	3.90915
7.65	-61.3403	-62.7136	-62.1643	-62.6831	-62.5							7.65	-57.9834	-58.0444	-58.5327	-58.1055					7.65	-51.5747	-51.4526	-51.7883	-51.3611							7.6	0.377838	3.55312	0.733871	3.04449	-0.494095	-0.632156	0.857391
7.7	-61.2488	-62.6831	-62.1948	-62.8052	-62.4695							7.7	-57.8613	-57.8918	-58.3801	-57.8308					7.7	-51.5137	-51.5747	-52.0019	-51.4526							7.65	1.59854	5.07899	0.428696	-1.53314	1.64214	-0.937332	2.68845
7.75	-60.9741	-62.5	-62.2559	-62.9578	-62.2864							7.75	-57.8918	-57.8003	-58.4717	-58.136					7.75	-51.5137	-51.3306	-52.0325	-51.3611							7.7	1.90372	5.99452	2.8701	-2.75385	-2.32515	0.893723	4.21432
7.8	-61.0962	-62.8357	-62.0728	-63.0493	-62.5							7.8	-58.0749	-58.0749	-58.6548	-57.8918					7.8	-51.3916	-51.4526	-51.7273	-51.3916							7.75	0.98819	4.16347	2.56493	1.21344	-2.01997	1.80925	4.82468
7.85	-61.4014	-62.6831	-61.8896	-62.9272	-62.3474							7.85	-57.9529	-58.0444	-58.4717	-57.9224					7.85	-51.6663	-51.4832	-51.9104	-51.0864							7.8	-0.842865	1.41688	-0.486832	-3.66937	-0.188919	-1.54768	0.857391
7.9	-61.4014	-62.3779	-62.1033	-63.0188	-62.4695							7.9	-57.7698	-57.8003	-58.3801	-58.0139					7.9	-51.6663	-51.3611	-52.063	-51.178							7.85	-0.842865	0.501358	-2.31789	-1.83832	1.64214	-1.54768	1.77292
7.95	-61.3098	-62.7136	-62.1948	-62.8662	-62.5							7.95	-57.8308	-57.9529	-58.5632	-57.9224					7.95	-51.6663	-51.5442	-51.9104	-51.3916							7.9	-0.537689	0.501358	-2.31789	-0.312439	-2.32515	-0.632156	4.21432
8	-61.2793	-62.6831	-62.1338	-62.7441	-62.1033							8	-58.0444	-58.0139	-58.5937	-57.8918					8	-51.5442	-51.4221	-51.7578	-51.4526							7.95	0.683014	0.806534	0.12352	-2.14349	-0.494095	1.80925	1.16257
8.05	-61.2793	-62.561	-62.0728	-62.6221	-62.5							8.05	-57.9529	-58.0444	-58.5632	-58.0139					8.05	-51.2695	-51.178	-52.0019	-51.239							8	0.98819	-0.108994	1.95457	3.34967	1.94731	-0.326981	-0.363312
8.1	-61.1572	-62.4695	-61.8591	-62.8662	-62.4084							8.1	-57.8003	-57.7087	-58.4106	-57.9224					8.1	-51.3916	-51.5137	-51.9714	-51.2085							8.05	1.90372	1.41688	-0.181656	-0.922791	2.86284	-3.37874	1.77292
8.15	-61.1572	-62.7441	-62.0728	-63.0188	-62.3474							8.15	-57.7698	-58.0139	-58.5937	-57.8918					8.15	-51.6968	-51.3916	-51.9714	-51.1475							8.1	0.072662	2.33241	-2.31789	-0.922791	-0.799271	-2.15803	-0.363312
8.2	-61.3708	-62.6221	-62.1948	-62.9883	-62.5305							8.2	-58.0749	-57.8918	-58.5632	-58.0444					8.2	-51.6663	-51.3	-51.7883	-51.2695							8.15	-2.06357	2.94276	-1.40236	1.82379	0.116257	0.588547	-2.19437
8.25	-61.4014	-62.4084	-62.1033	-62.8357	-62.2253							8.25	-57.9224	-57.9834	-58.4717	-57.9834					8.25	-51.5442	-51.4221	-52.063	-51.3611							8.2	-4.50497	3.24794	0.12352	-0.617615	3.16802	0.893723	0.552216
8.3	-61.3403	-62.6831	-62.0117	-62.9272	-62.5							8.3	-57.8308	-57.6477	-58.4412	-57.7698					8.3	-51.5747	-51.239	-51.9409	-51.3306							8.25	-3.28427	2.33241	0.733871	2.12897	4.08354	-2.46321	-0.668488
8.35	-61.3708	-62.6526	-61.8591	-62.7747	-62.4695							8.35	-57.6172	-58.0749	-58.6548	-58.1055					8.35	-51.3916	-51.5137	-51.9409	-51.3							8.3	-2.06357	1.72206	2.25975	-0.007263	0.421432	-2.46321	-2.19437
8.4	-61.2793	-62.439	-62.1643	-62.7136	-62.2253							8.4	-58.0444	-57.9834	-58.5022	-58.0444					8.4	-51.3611	-51.3611	-51.7273	-51.239							8.35	-2.67392	-0.108994	1.95457	-1.22797	0.726608	-1.85286	2.99362
8.45	-61.0352	-62.5305	-62.2559	-62.8052	-62.4695							8.45	-57.9224	-57.9834	-58.5022	-57.8308					8.45	-51.5442	-51.1475	-52.0325	-51.0864							8.4	-1.75839	-1.63487	-1.40236	3.34967	3.77837	0.893723	-0.973663
8.5	-61.2793	-62.6221	-62.1338	-62.9883	-62.3474							8.5	-57.8918	-57.7087	-58.5022	-58.1055					8.5	-51.6663	-51.4832	-52.0325	-51.1169							8.45	0.377838	-2.85558	-2.01271	-1.22797	3.77837	-0.632156	-0.058136
8.55	-61.4014	-62.5	-62.0728	-63.0188	-62.3474							8.55	-57.6172	-58.0749	-58.6548	-58.1055					8.55	-51.5747	-51.4526	-52.063	-51.3							8.5	0.683014	-1.3297	-1.40236	-1.22797	0.116257	-2.76839	3.90915
8.6	-61.2488	-62.3474	-61.9507	-62.8967	-62.439							8.6	-57.8613	-58.0139	-58.5632	-57.8613					8.6	-51.6357	-51.3306	-51.7578	-51.3611							8.55	-0.537689	-1.63487	-0.181656	1.51862	0.116257	-3.37874	-0.363312
8.65	-61.1877	-62.7136	-62.0728	-62.8662	-62.3474							8.65	-58.0444	-57.9834	-58.5022	-57.9224					8.65	-51.3916	-51.4832	-52.0935	-51.239							8.6	-2.06357	-0.719345	1.34422	-3.3642	0.726608	-0.326981	2.07809
8.7	-61.1267	-62.5915	-62.2864	-62.6831	-62.2864							8.7	-57.8613	-57.8003	-58.4717	-58.1665					8.7	-51.3306	-51.3611	-52.1545	-51.2695							8.65	-2.9791	-0.414169	3.48045	-0.617615	2.55766	1.80925	4.21432
8.75	-61.4014	-62.4084	-62.1948	-62.8662	-62.4084							8.75	-57.7698	-58.0749	-58.6853	-58.0444					8.75	-51.4526	-51.3916	-52.1851	-51.1475							8.7	-2.06357	0.501358	1.03905	-0.007263	0.116257	-1.24251	1.16257
8.8	-61.3403	-62.5	-62.1338	-63.0188	-62.3474							8.8	-57.7087	-58.1055	-58.5632	-57.8003					8.8	-51.5747	-51.4832	-51.9409	-50.9949							8.75	-1.45322	1.11171	-0.486832	-1.83832	-2.32515	-3.07356	4.21432
8.85	-61.1877	-62.6526	-62.1033	-63.0188	-62.3169							8.85	-57.9224	-58.0749	-58.5632	-58.197					8.85	-51.7273	-51.3306	-52.0019	-51.2695							8.8	-0.232513	2.02724	-0.792007	0.908264	-2.32515	-1.85286	1.77292
8.9	-61.3708	-62.5	-61.9812	-62.6221	-62.4084							8.9	-57.8308	-57.8613	-58.4717	-58.1055					8.9	-51.5442	-51.4221	-52.2156	-51.2695							8.85	0.683014	2.94276	0.733871	0.297913	0.421432	0.893723	0.857391
8.95	-61.3403	-62.1948	-62.1948	-62.8357	-62.3474							8.95	-57.7698	-58.0444	-58.5937	-58.0749					8.95	-51.5137	-51.4526	-52.1851	-51.2695							8.9	0.683014	-0.108994	0.733871	-0.617615	-2.01997	2.72478	5.12985
9	-61.1572	-62.561	-62.2864	-62.9272	-62.2559							9	-57.6782	-58.1055	-58.6243	-57.8613					9	-51.4832	-51.3916	-52.063	-51.3306							8.95	-1.14804	-1.3297	2.25975	0.297913	-5.07173	1.80925	1.46774
9.05	-61.4014	-62.5305	-62.1643	-62.8662	-62.5305							9.05	-57.6782	-58.1055	-58.5937	-58.1665					9.05	-51.4221	-51.3	-51.8799	-51.239							9	-2.36874	-1.3297	3.48045	0.908264	-4.1562	-0.021805	0.552216
9.1	-61.3403	-62.439	-62.1948	-62.7136	-62.3779							9.1	-57.8918	-57.8918	-58.4106	-58.0749					9.1	-51.3	-51.7273	-52.2156	-51.1475							9.05	-0.842865	-3.46593	0.733871	-1.83832	-2.63033	0.283371	4.5195
9.15	-61.1572	-62.2559	-61.9812	-62.8662	-62.1643							9.15	-57.8003	-57.9224	-58.5327	-57.9834					9.15	-51.5137	-51.5137	-52.2461	-50.9644							9.1	1.29337	-2.5504	-1.40236	-0.007263	-1.40962	2.72478	1.46774
9.2	-61.4014	-62.6221	-62.1338	-62.7747	-62.5							9.2	-57.8003	-58.1055	-58.6548	-57.9529					9.2	-51.6663	-51.3306	-52.2461	-51.2695							9.15	3.12442	-2.24522	-2.01271	-0.312439	-3.24068	4.86101	0.24704
9.25	-61.4624	-62.5	-62.2253	-62.8052	-62.5305							9.25	-57.4951	-58.0139	-58.5327	-58.1665					9.25	-51.6357	-51.6357	-51.9104	-51.3306							9.2	0.072662	-0.719345	-1.09718	-2.75385	-3.54585	1.80925	3.90915
9.3	-61.0657	-62.3169	-62.3474	-62.8052	-62.1033							9.3	-57.6477	-57.9834	-58.4717	-58.136					9.3	-51.5747	-51.6357	-52.1545	-51.4221							9.25	-0.232513	-1.63487	-0.486832	-0.312439	-2.32515	-1.24251	0.857391
9.35	-61.3708	-62.3169	-62.2253	-62.6526	-62.439							9.35	-57.8613	-57.8613	-58.3496	-57.8003					9.35	-51.6052	-51.4221	-52.3376	-51.2085							9.3	1.90372	0.196182	2.25975	3.34967	0.421432	-0.632156	-0.363312
9.4	-61.2183	-62.561	-62.2253	-62.8662	-62.3779							9.4	-57.7698	-58.0444	-58.6548	-57.9834					9.4	-51.6357	-51.5137	-52.3071	-51.4526							9.35	3.73477	0.196182	0.733871	-1.22797	0.726608	0.588547	1.16257
9.45	-61.4929	-62.3779	-62.1033	-62.9272	-62.2864							9.45	-57.6782	-58.1055	-58.5632	-58.197					9.45	-51.5442	-51.6052	-52.0935	-51.2085							9.4	0.072662	0.806534	-1.40236	0.297913	-1.40962	1.1989	0.857391
9.5	-61.4624	-62.2559	-61.9812	-62.5305	-62.3474							9.5	-57.5561	-57.9834	-58.5022	-58.0444					9.5	-51.4832	-51.6357	-51.8799	-51.0864							9.45	-0.842865	-0.108994	-0.792007	4.87555	-1.40962	2.4196	-1.58401
9.55	-61.0657	-62.4084	-62.2559	-62.8357	-62.6221							9.55	-57.6782	-57.9224	-58.3496	-57.9224					9.55	-51.6052	-51.4526	-52.2461	-50.9949							9.5	3.73477	0.806534	0.12352	2.43414	-0.799271	-0.326981	-0.363312
9.6	-61.3708	-62.561	-62.4695	-62.7747	-62.4695							9.6	-57.8918	-57.8308	-58.5022	-58.0749					9.6	-51.8494	-51.6663	-52.2461	-51.3611							9.55	-0.842865	3.24794	1.95457	0.908264	1.94731	-1.24251	2.07809
9.65	-61.1877	-62.439	-62.2559	-62.8357	-62.1338							9.65	-57.7087	-58.1055	-58.6243	-58.136					9.65	-51.7578	-51.6357	-52.124	-51.4526							9.6	-0.537689	2.33241	-1.09718	3.34967	1.94731	-0.632156	-3.41507
9.7	-61.4014	-62.1338	-62.2253	-62.7441	-62.4695							9.7	-57.7087	-57.9834	-58.5632	-58.1055					9.7	-51.6968	-51.4526	-52.0019	-51.3306							9.65	4.03995	1.11171	-1.09718	3.34967	-0.188919	2.11443	-1.88919
9.75	-61.3708	-62.3779	-62.2253	-62.5	-62.5							9.75	-57.4341	-57.9529	-58.4106	-57.8918					9.75	-51.7273	-51.6357	-51.9714	-51.2695							9.7	-1.45322	-0.719345	0.12352	-0.617615	-2.01997	4.25066	0.552216
9.8	-61.1267	-62.561	-62.1033	-62.8662	-62.2864							9.8	-57.6172	-57.7087	-58.3191	-58.0139					9.8	-51.7273	-51.7273	-52.1851	-51.3916							9.75	0.377838	-1.63487	1.95457	0.297913	0.116257	0.283371	-1.58401
9.85	-61.4319	-62.4695	-62.1338	-62.7136	-62.3474							9.85	-57.7698	-57.9224	-58.5327	-58.197					9.85	-51.6357	-51.6968	-52.2156	-51.3306							9.8	3.12442	-1.3297	-3.23341	4.57037	2.25249	-1.24251	-4.94095
9.9	-61.2183	-62.2253	-62.2253	-62.6526	-62.5305							9.9	-57.7698	-58.0139	-58.6548	-58.0749					9.9	-51.4832	-51.4832	-52.1851	-51.1475							9.85	-1.75839	-0.414169	-2.01271	-0.617615	2.86284	-1.54768	-3.41507
9.95	-61.3403	-62.3474	-62.2864	-62.6526	-62.4084							9.95	-57.7087	-57.9529	-58.5022	-57.9224					9.95	-51.6663	-51.7883	-52.0325	-51.0559							9.9	0.98819	0.501358	1.95457	-1.83832	0.116257	2.4196	-0.973663
10	-61.3403	-62.561	-62.4084	-62.5	-62.1643							10	-57.6477	-57.8918	-58.4106	-58.0139					10	-51.8799	-51.6663	-52.0019	-51.2695							9.95	3.12442	-0.108994	-2.92824	-0.617615	-1.10445	-0.632156	-5.24612
10.05	-61.0657	-62.4084	-62.3169	-62.8357	-62.4084							10.05	-57.4341	-57.7698	-58.197	-58.1665					10.05	-51.7883	-51.5442	-52.2156	-51.4221							10	1.29337	-2.85558	-0.181656	-1.53314	0.421432	-1.85286	-5.24612
10.1	-61.4014	-62.1948	-62.1948	-62.7441	-62.3474							10.1	-57.7087	-57.7698	-58.5937	-58.1665					10.1	-51.7273	-51.5137	-52.2156	-51.4221							10.05	4.34512	-2.24522	1.03905	-5.19525	2.25249	-0.326981	-2.80472
10.15	-61.2488	-62.1643	-62.1643	-62.4084	-62.3474							10.15	-57.8003	-57.9834	-58.5022	-57.9834					10.15	-51.4221	-51.7578	-52.1851	-51.3611							10.1	0.683014	0.501358	-2.01271	-4.5849	3.47319	1.80925	-1.27884
10.2	-61.1267	-62.4695	-62.1643	-62.6831	-62.2253							10.2	-57.7393	-57.8613	-58.5022	-57.8918					10.2	-51.6663	-51.6968	-52.1851	-51.4221							10.15	1.29337	2.63759	0.733871	-1.53314	0.116257	-2.46321	-4.63577
10.25	-61.3708	-62.3474	-62.3169	-62.5	-62.4084							10.25	-57.7087	-57.9834	-58.3496	-58.2581					10.25	-51.8799	-51.5137	-51.9714	-51.3							10.2	5.26065	-1.02452	-0.181656	-3.66937	-1.40962	0.283371	-2.49954
10.3	-61.2488	-62.2559	-62.2864	-62.5915	-62.4084							10.3	-57.5561	-57.6782	-58.3191	-58.1055					10.3	-51.7883	-51.5137	-52.1545	-51.0864							10.25	0.683014	0.196182	-0.792007	-4.5849	0.421432	1.50407	-0.058136
10.35	-61.0962	-62.1033	-62.3474	-62.6526	-62.2559							10.35	-57.4951	-57.7698	-58.4106	-58.0139					10.35	-51.5137	-51.6357	-52.2156	-51.3							10.3	3.4296	1.11171	3.78563	-3.05902	0.421432	-2.15803	1.16257
10.4	-61.3403	-62.4695	-62.2864	-62.439	-62.3474							10.4	-57.7698	-57.8918	-58.4412	-57.8918					10.4	-51.8494	-51.6052	-52.2766	-51.4526							10.35	1.59854	1.41688	-1.40236	0.908264	2.25249	0.588547	-0.668488
10.45	-61.1877	-62.439	-62.439	-62.5915	-62.4084							10.45	-57.7698	-57.9529	-58.4412	-58.1665					10.45	-51.7883	-51.3611	-52.124	-51.4221							10.4	0.377838	-1.02452	1.95457	-3.97455	1.64214	-1.54768	-0.363312
10.5	-61.2488	-62.2864	-62.2253	-62.6221	-62.3779							10.5	-57.7393	-57.8613	-58.4412	-58.136					10.5	-51.5747	-51.5137	-51.9714	-51.178							10.45	4.95547	0.806534	-0.486832	-3.97455	-1.7148	-1.85286	3.2988
10.55	-61.3098	-62.1033	-62.0422	-62.3779	-62.1643							10.55	-57.7087	-57.8308	-58.197	-58.0749					10.55	-51.6357	-51.6357	-52.0019	-51.239							10.5	0.98819	2.63759	-1.09718	-0.617615	-2.63033	2.11443	1.46774
10.6	-61.1877	-62.2253	-62.2864	-62.561	-62.4084							10.6	-57.6782	-57.5256	-58.3496	-57.8308					10.6	-51.8494	-51.6052	-52.3376	-51.5137							10.55	1.29337	-1.63487	3.17528	1.51862	-2.01997	-2.46321	-0.363312
10.65	-61.2488	-62.439	-62.5305	-62.6221	-62.3169							10.65	-57.4951	-57.8003	-58.4412	-57.9529					10.65	-51.6663	-51.3611	-52.2766	-51.3916							10.6	5.26065	0.501358	-2.62306	-2.44867	-0.799271	1.50407	-0.058136
10.7	-61.3708	-62.2559	-62.4084	-62.5305	-62.3474							10.7	-57.6782	-57.9529	-58.4106	-58.136					10.7	-51.6968	-51.4832	-52.2461	-51.0254							10.65	0.98819	2.94276	2.25975	-1.83832	1.94731	-3.07356	2.99362
10.75	-61.2183	-62.1948	-62.3779	-62.5915	-62.1338							10.75	-57.8308	-57.7393	-58.4106	-58.0444					10.75	-51.7578	-51.6968	-52.1851	-51.4221							10.7	1.29337	-1.63487	-0.792007	1.21344	2.55766	-1.24251	2.68845
10.8	-61.1572	-62.0422	-62.3169	-62.6526	-62.4084							10.8	-57.7698	-57.8003	-58.2581	-57.8918					10.8	-51.6663	-51.6052	-52.0935	-51.3916							10.75	5.56583	-0.108994	-1.70754	2.12897	0.116257	-0.326981	-0.058136
10.85	-61.4014	-62.3474	-62.2559	-62.6221	-62.3474							10.85	-57.7393	-57.7087	-58.0749	-57.7698					10.85	-51.7883	-51.3306	-52.1545	-51.1169							10.8	1.59854	5.07899	1.6494	-0.922791	0.116257	-3.37874	0.24704
10.9	-61.3708	-62.3169	-62.5	-62.439	-62.2864							10.9	-57.7087	-57.6172	-58.3191	-58.1665					10.9	-51.8188	-51.4832	-52.3376	-51.5747							10.85	1.29337	-0.108994	-2.01271	-1.22797	0.726608	0.283371	3.60397
10.95	-61.0657	-62.2559	-62.3779	-62.7136	-62.1338							10.95	-57.6172	-57.8308	-58.3496	-58.0444					10.95	-51.4832	-51.6968	-52.2461	-51.4832							10.9	5.26065	0.196182	1.6494	1.21344	3.16802	-3.98909	4.21432
11	-61.3708	-62.1643	-62.2864	-62.6526	-62.3779							11	-57.5867	-57.8613	-58.2886	-58.0139					11	-51.8799	-51.5747	-52.2766	-51.2085							10.95	0.98819	3.55312	-0.181656	2.43414	4.69389	1.80925	2.07809
11.05	-61.3098	-62.1643	-62.2253	-62.3779	-62.3779							11.05	-57.8003	-57.7698	-58.197	-57.9834					11.05	-51.7578	-51.4526	-52.2766	-51.5442							11	1.90372	0.501358	-0.486832	-0.922791	4.99907	-3.98909	2.07809
11.1	-61.0657	-62.2864	-62.4695	-62.7441	-62.3169							11.1	-57.8308	-57.7698	-58.1665	-57.8003					11.1	-51.6663	-51.4526	-52.063	-51.3916							11.05	5.56583	0.501358	3.78563	-1.83832	1.33696	-0.937332	4.82468
11.15	-61.3708	-62.2253	-62.3779	-62.6221	-62.0422							11.15	-57.8308	-57.7087	-58.0139	-58.0139					11.15	-51.8188	-51.7273	-52.1851	-51.3							11.1	1.90372	4.46864	-0.486832	-0.922791	0.421432	-3.07356	5.7402
11.2	-61.2793	-62.2559	-62.1643	-62.5305	-62.3169							11.2	-57.8003	-57.6477	-58.2886	-57.9834					11.2	-51.6663	-51.6052	-52.3376	-51.5137							11.15	0.377838	0.501358	1.6494	0.297913	-1.10445	-1.85286	2.07809
11.25	-61.2488	-62.1948	-62.4695	-62.7136	-62.3779							11.25	-57.7698	-57.8918	-58.3191	-58.0444					11.25	-51.8799	-51.5137	-52.3987	-51.3611							11.2	2.51407	-0.414169	3.48045	-4.5849	-1.7148	1.1989	1.77292
11.3	-61.2183	-62.0422	-62.4695	-62.7136	-62.2864							11.3	-57.6782	-57.8918	-58.2275	-57.9834					11.3	-51.8494	-51.3	-52.2156	-51.4221							11.25	3.73477	3.55312	-1.40236	-5.50043	0.421432	-1.54768	2.38327
11.35	-61.3403	-62.2253	-62.0728	-62.5915	-62.1338							11.35	-57.6477	-57.7393	-58.3191	-57.7698					11.35	-51.5137	-51.6663	-52.2766	-51.4832							11.3	0.072662	2.02724	0.733871	-3.66937	2.55766	3.33513	4.82468
11.4	-61.2183	-62.1948	-62.5	-62.5305	-62.2253							11.4	-57.8308	-57.7698	-58.197	-57.9529					11.4	-51.8494	-51.7578	-52.1851	-51.2085							11.35	1.90372	0.196182	1.95457	-1.53314	1.33696	-0.937332	0.24704
11.45	-61.0352	-62.1948	-62.2864	-62.8357	-62.3779							11.45	-57.9529	-57.7393	-57.9529	-57.9834					11.45	-51.8494	-51.5747	-52.063	-51.6052							11.4	5.56583	2.02724	-2.62306	-4.89008	-1.10445	2.4196	-0.058136
11.5	-61.3708	-62.0422	-62.2864	-62.6526	-62.3474							11.5	-57.8918	-57.6172	-58.1055	-58.0444					11.5	-51.7273	-51.3916	-52.1545	-51.4526							11.45	2.81924	5.38417	0.12352	-6.72113	-0.494095	0.893723	-0.363312
11.55	-61.3403	-61.9202	-62.3779	-62.3779	-62.2253							11.55	-57.8613	-57.6477	-58.3496	-57.8613					11.55	-51.8494	-51.5137	-52.3071	-51.3306							11.5	1.90372	2.02724	0.428696	-4.27972	1.03178	-0.021805	2.68845
11.6	-61.0352	-62.2253	-62.1033	-62.6831	-62.1643							11.6	-57.8003	-57.8613	-58.2886	-57.6477					11.6	-51.7273	-51.7273	-52.3376	-51.4526							11.55	4.03995	2.02724	-2.62306	-1.22797	1.94731	3.33513	1.16257
11.65	-61.1877	-62.2864	-62.439	-62.7441	-62.4695							11.65	-57.7393	-57.7698	-58.2275	-57.9224					11.65	-51.8799	-51.6357	-52.2156	-51.2695							11.6	4.6503	5.07899	-0.792007	-3.3642	4.08354	0.893723	-1.27884
11.7	-61.2488	-62.2253	-62.4695	-62.6526	-62.3169							11.7	-57.6782	-57.7393	-58.2275	-58.0749					11.7	-51.8188	-51.4832	-52.2461	-51.6357							11.65	0.98819	5.68935	-0.181656	-6.41596	6.21977	4.86101	-1.88919
11.75	-61.2183	-61.9812	-62.0422	-62.5	-62.2253							11.75	-57.8003	-57.7393	-58.136	-57.8613					11.75	-51.6968	-51.5137	-52.0935	-51.4221							11.7	2.51407	3.24794	-2.31789	-5.19525	6.83012	1.80925	1.77292
11.8	-61.0046	-61.8896	-62.3779	-62.7747	-62.1033							11.8	-57.9834	-57.6477	-58.0139	-57.8003					11.8	-51.7883	-51.6968	-52.0019	-51.2695							11.75	5.871	2.63759	-1.40236	-2.14349	4.99907	0.893723	3.90915
11.85	-61.2793	-62.0728	-62.2559	-62.7747	-62.3169							11.85	-58.0444	-57.4646	-58.197	-57.7393					11.85	-51.9409	-51.6968	-52.0935	-51.6052							11.8	1.90372	5.99452	1.03905	-1.22797	3.47319	4.25066	-1.27884
11.9	-61.2183	-62.2559	-62.3474	-62.439	-62.439							11.9	-58.0139	-57.7087	-58.3496	-57.8003					11.9	-51.8188	-51.6052	-52.3682	-51.4526							11.85	0.072662	5.68935	-3.23341	-3.97455	2.86284	0.588547	-2.49954
11.95	-61.0046	-62.0728	-62.4695	-62.6526	-62.3779							11.95	-58.0444	-57.8003	-58.2886	-57.8613					11.95	-51.8188	-51.4526	-52.2766	-51.3611							11.9	1.59854	1.41688	-0.792007	-4.27972	3.16802	1.50407	-1.88919
12	-61.1267	-62.1033	-62.0728	-62.7136	-62.2864							12	-57.9834	-57.8003	-58.2581	-57.8613					12	-51.9104	-51.4221	-52.2766	-51.5442							11.95	3.4296	2.02724	3.17528	-2.75385	2.55766	3.33513	2.07809
12.05	-61.2488	-61.9812	-62.439	-62.7136	-62.1338							12.05	-57.8918	-57.6782	-58.1665	-57.8613					12.05	-51.8494	-51.6663	-52.2461	-51.4526							12	-0.842865	4.77382	-0.486832	-0.312439	3.47319	-0.021805	1.46774
12.1	-61.1877	-61.9507	-62.3169	-62.439	-62.3779							12.1	-57.8918	-57.7393	-58.136	-57.8308					12.1	-51.8188	-51.6052	-52.2156	-51.3306							12.05	-0.537689	5.99452	-0.181656	-2.14349	5.30424	3.02995	-2.49954
12.15	-60.9436	-62.1033	-62.3779	-62.7136	-62.3474							12.15	-57.8613	-57.6477	-58.0444	-57.5256					12.15	-51.9714	-51.6357	-52.1545	-51.6052							12.1	1.90372	2.02724	3.78563	-4.5849	4.08354	0.893723	-2.49954
12.2	-61.3098	-62.1948	-62.4084	-62.6831	-62.4695							12.2	-58.0749	-57.5867	-58.0749	-57.6782					12.2	-51.8799	-51.3611	-51.9104	-51.4526							12.15	2.20889	2.33241	1.34422	-4.89008	1.94731	0.588547	-1.27884
12.25	-61.1572	-62.0422	-62.1033	-62.561	-62.2253							12.25	-58.136	-57.4951	-58.2275	-57.8613					12.25	-51.7273	-51.4832	-52.1545	-51.239							12.2	-1.45322	3.55312	-0.486832	-2.44867	-0.494095	3.94548	1.16257
12.3	-61.1267	-62.1338	-62.4695	-62.6221	-62.1948							12.3	-58.0749	-57.7087	-58.3191	-57.7393					12.3	-52.063	-51.6357	-52.3071	-51.5442							12.25	-0.232513	7.21523	4.0908	-0.922791	-0.494095	-0.326981	2.99362
12.35	-61.0352	-61.9507	-62.439	-62.6831	-62.4695							12.35	-58.136	-57.7698	-58.2581	-57.6782					12.35	-51.9409	-51.6357	-52.3071	-51.4832							12.3	1.90372	2.63759	2.8701	-3.66937	0.726608	-0.021805	0.24704
12.4	-61.3098	-61.8591	-62.1338	-62.6831	-62.5							12.4	-58.0444	-57.7698	-58.1665	-57.5561					12.4	-51.8188	-51.5747	-52.2766	-51.1475							12.35	1.59854	1.11171	0.733871	-4.89008	0.726608	3.02995	-0.668488
12.45	-61.1877	-62.1033	-62.5305	-62.5915	-62.3474							12.45	-57.9529	-57.6172	-58.2581	-57.4646					12.45	-51.9104	-51.4832	-52.3071	-51.4832							12.4	-2.36874	2.33241	2.8701	-4.27972	1.94731	-0.632156	1.16257
12.5	-61.1267	-62.1948	-62.3779	-62.6831	-62.1948							12.5	-58.3191	-57.7087	-58.136	-57.5867					12.5	-52.0019	-51.3916	-52.1851	-51.4832							12.45	0.072662	5.07899	5.31151	-1.53314	-1.10445	-0.021805	2.99362
12.55	-61.0352	-62.0728	-62.1948	-62.7136	-62.2559							12.55	-58.2581	-57.6477	-58.0749	-57.7087					12.55	-51.8494	-51.6968	-52.0325	-51.2085							12.5	1.90372	4.46864	0.733871	0.603088	-2.32515	3.02995	4.21432
12.6	-61.3098	-62.0728	-62.439	-62.6526	-62.6221							12.6	-58.1055	-57.5256	-58.1055	-57.5867					12.6	-51.6968	-51.6357	-52.0019	-51.4221							12.55	1.90372	2.33241	-0.181656	-1.83832	-1.7148	-0.937332	1.77292
12.65	-61.1877	-62.0117	-62.439	-62.4695	-62.4695							12.65	-58.0444	-57.4341	-58.2886	-57.5867					12.65	-51.9714	-51.6052	-52.0935	-51.3916							12.6	-1.45322	2.94276	3.17528	-3.3642	-0.188919	0.588547	0.857391
12.7	-61.0962	-61.8896	-62.2559	-62.6221	-62.5							12.7	-58.2886	-57.6782	-58.3191	-57.5256					12.7	-51.9104	-51.4832	-52.3071	-51.3611							12.65	-0.232513	4.77382	0.428696	-3.66937	0.116257	2.72478	2.99362
12.75	-61.0352	-62.1033	-62.4695	-62.6831	-62.3169							12.75	-58.2886	-57.7393	-58.3496	-57.2815					12.75	-51.7883	-51.3306	-52.2461	-51.2695							12.7	2.51407	6.2997	-1.09718	-1.22797	-2.63033	-0.326981	3.60397
12.8	-61.2488	-62.1948	-62.3474	-62.6221	-62.3779							12.8	-58.1055	-57.6782	-58.197	-57.373					12.8	-51.7883	-51.6357	-52.2156	-51.5137							12.75	2.81924	4.16347	1.95457	0.908264	-0.188919	1.80925	5.43503
12.85	-61.1572	-62.1948	-62.2253	-62.439	-62.5915							12.85	-58.2275	-57.6172	-58.1665	-57.5561					12.85	-52.0019	-51.6663	-52.1545	-51.4221							12.8	-0.842865	2.02724	3.78563	-1.53314	3.16802	2.11443	4.21432
12.9	-61.0657	-62.1033	-62.5305	-62.6526	-62.561							12.9	-58.2275	-57.6172	-58.136	-57.6172					12.9	-51.8799	-51.5137	-52.0325	-51.239							12.85	-0.232513	2.33241	0.428696	-2.75385	-0.188919	-0.326981	1.77292
12.95	-60.9741	-62.0728	-62.3474	-62.7747	-62.561							12.95	-58.1665	-57.4646	-58.1055	-57.4646					12.95	-51.6357	-51.5747	-52.2156	-51.4832							12.9	2.51407	3.85829	1.34422	-2.75385	-1.40962	2.11443	1.77292
13	-61.1877	-61.9812	-62.2253	-62.6526	-62.5305							13	-58.3191	-57.6477	-57.9224	-57.4036					13	-51.8799	-51.3611	-52.1545	-51.4526							12.95	4.03995	4.16347	4.39598	-2.14349	3.16802	3.33513	2.99362
13.05	-61.1877	-61.9202	-62.5	-62.5305	-62.1948							13.05	-58.197	-57.5867	-58.0139	-57.4951					13.05	-51.9409	-51.4221	-52.1545	-51.3611							13	0.377838	-0.108994	3.78563	1.21344	-1.40962	0.283371	5.12985
13.1	-61.0352	-62.1033	-62.3779	-62.6526	-62.439							13.1	-58.0444	-57.6172	-58.136	-57.3425					13.1	-51.8188	-51.6663	-52.0019	-51.3306							13.05	0.377838	-1.94005	1.03905	1.21344	-1.7148	3.02995	6.65573
13.15	-61.0046	-62.1338	-62.1338	-62.8052	-62.6526							13.15	-58.4412	-57.3425	-58.3191	-57.2815					13.15	-51.7578	-51.6357	-52.2156	-51.6052							13.1	1.59854	-0.108994	2.8701	-1.83832	2.86284	4.55583	4.21432
13.2	-61.1267	-62.1643	-62.3779	-62.6221	-62.6221							13.2	-58.2581	-57.5867	-58.1665	-57.5256					13.2	-52.0019	-51.6357	-52.063	-51.4832							13.15	3.4296	1.41688	5.61668	-2.44867	-2.01997	0.588547	2.68845
13.25	-61.0962	-62.1948	-62.5305	-62.5915	-62.6831							13.25	-57.9834	-57.6477	-58.1665	-57.7087					13.25	-52.0019	-51.6052	-51.9409	-51.239							13.2	0.377838	2.33241	3.17528	-1.22797	-0.494095	2.11443	5.12985
13.3	-61.0352	-62.0422	-62.2559	-62.5	-62.3474							13.3	-58.4106	-57.6172	-58.1055	-57.4646					13.3	-51.9104	-51.3306	-52.1851	-51.4526							13.25	-0.232513	-1.02452	1.34422	1.51862	1.64214	5.16618	5.7402
13.35	-60.9436	-61.8286	-62.1643	-62.8052	-62.3169							13.35	-58.2275	-57.312	-57.9224	-57.4646					13.35	-51.7883	-51.4221	-52.063	-51.5747							13.3	1.59854	-1.3297	3.17528	5.18072	-1.10445	0.283371	6.65573
13.4	-61.0962	-62.0422	-62.439	-62.6221	-62.5915							13.4	-58.1665	-57.5867	-58.1055	-57.4341					13.4	-52.0019	-51.6357	-51.7273	-51.4221							13.35	4.6503	-1.02452	6.22704	2.43414	1.03178	0.588547	6.65573
13.45	-61.0657	-62.2864	-62.439	-62.6831	-62.7441							13.45	-58.197	-57.5256	-58.2581	-57.4341					13.45	-51.9409	-51.6968	-52.124	-51.178							13.4	3.12442	0.196182	2.25975	0.908264	0.421432	3.64031	4.5195
13.5	-61.1267	-62.0728	-62.0422	-62.439	-62.5305							13.5	-58.0139	-57.4036	-58.136	-57.251					13.5	-51.8799	-51.5137	-52.0325	-51.5747							13.45	0.377838	2.63759	2.56493	2.43414	-1.7148	-0.326981	2.68845
13.55	-60.8215	-61.9812	-62.4084	-62.6526	-62.5							13.55	-58.3801	-57.6172	-57.9834	-57.4646					13.55	-51.8799	-51.4526	-51.8494	-51.4832							13.5	1.90372	-0.414169	3.48045	3.04449	3.77837	-0.632156	2.68845
13.6	-61.0657	-61.9812	-62.3474	-62.7136	-62.4084							13.6	-58.197	-57.5561	-58.0139	-57.5561					13.6	-52.063	-51.4221	-52.0325	-51.3611							13.55	2.81924	-0.108994	4.39598	3.04449	-0.799271	2.11443	2.68845
13.65	-61.0962	-62.2253	-62.2253	-62.7441	-62.4084							13.65	-58.1055	-57.4036	-58.1665	-57.7087					13.65	-51.9714	-51.3916	-51.9714	-51.239							13.6	3.12442	-0.719345	1.03905	5.4859	2.55766	-2.46321	3.60397
13.7	-61.0657	-62.1338	-62.3779	-62.5305	-62.5915							13.7	-58.2275	-57.5867	-58.0749	-57.5256					13.7	-51.9104	-51.5137	-51.8494	-51.5442							13.65	-0.232513	1.41688	1.03905	2.12897	0.116257	-2.15803	6.04538
13.75	-60.9741	-61.8896	-62.3169	-62.5915	-62.6831							13.75	-58.136	-57.3425	-57.9529	-57.5256					13.75	-51.8188	-51.5747	-52.0325	-51.5747							13.7	-2.06357	3.24794	3.17528	0.297913	-0.799271	2.11443	3.90915
13.8	-60.9131	-62.1643	-62.2559	-62.7747	-62.5305							13.8	-58.3191	-57.6477	-58.1665	-57.5256					13.8	-52.0019	-51.5747	-51.6357	-51.3611							13.75	-2.06357	3.24794	3.17528	-1.22797	4.08354	-1.85286	2.07809
13.85	-61.1267	-62.1948	-62.1338	-62.7136	-62.6526							13.85	-58.2581	-57.4951	-58.0749	-57.5867					13.85	-52.0019	-51.4832	-52.0019	-51.239							13.8	-0.232513	0.806534	0.12352	0.297913	-1.40962	-1.24251	0.857391
13.9	-61.1267	-62.0422	-62.4695	-62.5915	-62.439							13.9	-57.9834	-57.2815	-57.8613	-57.3425					13.9	-51.8799	-51.3611	-51.9409	-51.6968							13.85	-0.232513	-0.414169	0.12352	1.82379	-0.188919	1.80925	2.99362
13.95	-60.9741	-62.2559	-62.3169	-62.5	-62.3169							13.95	-58.3191	-57.5561	-58.2581	-57.3425					13.95	-51.8188	-51.2695	-51.7578	-51.5442							13.9	-3.89462	0.501358	1.95457	2.43414	1.94731	2.72478	4.5195
14	-60.73	-62.2253	-62.1948	-62.6526	-62.5305							14	-58.2886	-57.373	-58.0749	-57.5256					14	-51.9714	-51.2085	-51.9409	-51.3611							13.95	-3.89462	2.33241	2.8701	1.82379	-1.7148	0.893723	4.82468
14.05	-61.0046	-61.8591	-62.3169	-62.7441	-62.7136							14.05	-57.8918	-57.4646	-57.8613	-57.7393					14.05	-51.9409	-51.3916	-51.7273	-51.239							14	-2.67392	2.94276	-0.792007	-0.922791	0.421432	2.72478	6.65573
14.1	-61.0962	-62.3169	-62.439	-62.7136	-62.6831							14.1	-58.4106	-57.4646	-58.136	-57.6477					14.1	-51.8494	-51.4832	-51.9104	-51.5442							14.05	-0.232513	-0.414169	-1.40236	-1.22797	-0.188919	5.77653	4.82468
14.15	-61.0657	-62.1338	-62.2864	-62.7441	-62.6526							14.15	-58.2581	-57.1289	-57.9834	-57.6782					14.15	-51.8799	-51.3916	-51.8799	-51.4832							14.1	0.072662	-2.24522	-0.181656	-0.922791	-2.01997	1.50407	3.2988
14.2	-60.8215	-62.0728	-62.0728	-62.4695	-62.6221							14.2	-57.9529	-57.5867	-57.9529	-57.6477					14.2	-52.0325	-51.3916	-51.5747	-51.3916							14.15	-2.67392	-2.24522	0.733871	-0.617615	0.726608	2.4196	1.16257
14.25	-60.7605	-62.1948	-62.3779	-62.6526	-62.439							14.25	-58.3191	-57.4036	-58.0749	-57.7698					14.25	-51.9714	-51.3306	-51.8494	-51.2695							14.2	-2.06357	-1.02452	-2.31789	0.603088	-0.494095	4.25066	1.77292
14.3	-61.0046	-62.0117	-62.439	-62.8052	-62.3169							14.3	-58.3191	-57.2815	-57.8613	-57.6172					14.3	-51.9714	-51.239	-51.7883	-51.5442							14.25	-2.36874	-0.719345	-1.70754	2.73932	-2.01997	0.893723	2.07809
14.35	-61.0352	-62.2559	-62.2559	-62.8052	-62.561							14.35	-58.0139	-57.373	-58.136	-57.5867					14.35	-51.7273	-51.1475	-51.6663	-51.4526							14.3	-0.537689	2.02724	0.12352	0.603088	1.03178	-0.021805	2.68845
14.4	-60.9131	-62.1643	-62.1033	-62.6526	-62.7136							14.4	-58.3496	-57.251	-58.0444	-57.4036					14.4	-51.9409	-51.3	-51.7578	-51.3611							14.35	0.377838	0.501358	2.8701	-2.44867	-1.10445	0.893723	4.21432
14.45	-60.7605	-62.1033	-62.439	-62.439	-62.7747							14.45	-58.2886	-57.4341	-57.7698	-57.6477					14.45	-51.9714	-51.4526	-51.6052	-51.1475							14.4	-2.67392	-0.719345	-0.792007	-2.44867	-2.63033	0.588547	2.68845
14.5	-60.73	-62.2864	-62.3474	-62.7441	-62.6831							14.5	-58.136	-57.373	-58.0749	-57.7087					14.5	-51.9409	-51.3916	-51.7273	-51.4832							14.45	-4.50497	-0.414169	-0.486832	-1.53314	0.421432	-2.46321	0.857391
14.55	-60.9741	-61.8286	-62.1643	-62.8662	-62.6526							14.55	-58.3801	-57.1899	-57.9529	-57.8308					14.55	-51.7578	-51.3	-51.7578	-51.4832							14.5	-2.67392	0.501358	0.733871	-0.007263	-0.188919	-2.15803	-0.363312
14.6	-61.0046	-62.2559	-62.0117	-62.7441	-62.561							14.6	-58.2581	-57.4646	-57.8613	-57.7393					14.6	-51.8188	-51.3306	-51.6357	-51.4221							14.55	-1.75839	3.55312	3.48045	1.21344	-2.9355	2.72478	0.24704
14.65	-60.852	-62.0728	-62.3779	-62.6526	-62.439							14.65	-58.197	-57.3425	-58.0444	-57.8003					14.65	-51.9714	-51.3	-51.6968	-51.0864							14.6	0.98819	5.68935	2.25975	3.04449	-0.494095	-2.76839	-0.363312
14.7	-60.8215	-62.1948	-62.2864	-62.561	-62.5305							14.7	-58.2275	-57.1594	-57.8308	-57.6782					14.7	-51.9409	-51.178	-51.7883	-51.3306							14.65	-2.36874	3.85829	0.12352	2.12897	1.64214	-2.46321	1.46774
14.75	-60.6689	-62.1948	-62.1948	-62.7747	-62.6831							14.75	-58.4717	-57.4036	-58.0749	-57.5867					14.75	-51.7883	-51.0254	-51.6052	-51.4832							14.7	-3.58945	1.72206	0.733871	-0.617615	-3.24068	-0.021805	2.68845
14.8	-60.8826	-61.8896	-62.0728	-62.8662	-62.7747							14.8	-58.2886	-57.3425	-57.9834	-57.7698					14.8	-51.6663	-51.1475	-51.6052	-51.3916							14.75	-1.75839	0.806534	3.48045	-1.83832	-1.40962	1.50407	3.90915
14.85	-60.9741	-62.2559	-62.2864	-62.7747	-62.6831							14.85	-58.0749	-57.1289	-57.8003	-57.8918					14.85	-51.9409	-51.3611	-51.6968	-51.239							14.8	-1.45322	1.72206	3.48045	-2.14349	4.08354	-3.07356	2.99362
14.9	-60.8826	-62.1033	-62.2864	-62.8967	-62.7441							14.9	-58.5022	-57.373	-58.0749	-57.7698					14.9	-51.9104	-51.3611	-51.7273	-51.0864							14.85	0.072662	1.11171	0.428696	-2.14349	-1.10445	-3.07356	2.07809
14.95	-60.8826	-62.1338	-62.1338	-62.6526	-62.6221							14.95	-58.4412	-57.251	-57.9834	-57.5867					14.95	-51.8799	-51.3	-51.6052	-51.5442							14.9	0.072662	2.02724	0.428696	-0.617615	-0.799271	1.50407	2.68845
15	-60.6995	-62.1643	-62.0728	-62.5915	-62.6221							15	-58.2275	-57.1594	-57.7087	-57.7393					15	-51.7578	-51.239	-51.7578	-51.3306							14.95	-1.75839	3.85829	1.6494	1.21344	2.55766	-0.021805	3.2988
15.05	-60.7605	-61.8286	-62.2864	-62.8052	-62.5							15.05	-58.3496	-57.312	-58.1055	-57.9529					15.05	-51.6663	-51.3	-51.7273	-51.239							15	-3.28427	2.02724	4.0908	2.43414	2.25249	-3.07356	4.82468
15.1	-61.0352	-62.1643	-62.2253	-63.0188	-62.6526							15.1	-58.5022	-57.312	-58.0139	-57.8003					15.1	-51.8494	-51.2085	-51.3916	-50.9949							15.05	-2.36874	0.501358	2.56493	3.34967	0.116257	-2.15803	5.43503
15.15	-60.8826	-62.1948	-62.1338	-62.8967	-62.7441							15.15	-58.4717	-57.2205	-57.8613	-57.5867					15.15	-51.9409	-51.0559	-51.8188	-51.3							15.1	-0.232513	-0.719345	1.03905	1.51862	1.03178	1.50407	6.96091
15.2	-60.9436	-61.8286	-62.0117	-62.8052	-62.7441							15.2	-58.197	-57.1899	-58.1055	-57.8918					15.2	-51.8494	-51.0254	-51.6663	-51.3611							15.15	1.59854	-0.414169	1.03905	-0.922791	2.25249	-1.54768	8.18161
15.25	-60.791	-62.1643	-62.1948	-62.6526	-62.6526							15.25	-58.5327	-57.373	-58.0444	-57.9224					15.25	-51.7578	-51.2085	-51.4526	-51.239							15.2	2.20889	-0.719345	3.17528	-2.14349	-0.188919	-2.76839	9.09714
15.3	-60.6995	-62.0728	-62.1948	-62.7136	-62.6221							15.3	-58.4717	-57.312	-57.8918	-57.5867					15.3	-51.6663	-51.3611	-51.7273	-51.1475							15.25	-0.232513	2.02724	5.92186	-1.22797	0.726608	-1.54768	8.79196
15.35	-60.852	-62.0422	-62.2253	-62.8662	-62.3779							15.35	-58.3801	-56.9763	-58.1665	-57.9224					15.35	-52.0019	-51.3	-51.7883	-50.9949							15.3	-1.14804	3.24794	3.48045	-0.617615	3.16802	1.80925	7.87643
15.4	-61.0657	-62.1338	-61.9812	-62.9578	-62.6526							15.4	-58.2886	-57.373	-57.9529	-57.9224					15.4	-51.9104	-51.3	-51.5137	-51.3916							15.35	-1.14804	3.24794	1.34422	1.82379	0.726608	-0.937332	6.35055
15.45	-60.9131	-61.9507	-62.2253	-62.8357	-62.7441							15.45	-58.5632	-57.2815	-57.9834	-57.7087					15.45	-51.8494	-51.1169	-51.3611	-51.239							15.4	0.377838	2.02724	2.56493	0.297913	-0.799271	-0.632156	5.43503
15.5	-61.0046	-61.9507	-62.1948	-62.9883	-62.7136							15.5	-58.5632	-57.0984	-57.9224	-57.9224					15.5	-51.6968	-50.9949	-51.6663	-51.2695							15.45	2.20889	0.501358	4.39598	-3.97455	1.33696	1.50407	5.7402
15.55	-60.852	-62.1338	-62.1948	-62.7136	-62.4084							15.55	-58.3496	-57.0679	-58.197	-57.8613					15.55	-51.6968	-51.239	-51.6357	-51.1475							15.5	3.4296	-1.02452	7.44774	-1.53314	2.55766	3.02995	6.04538
15.6	-60.6689	-61.9202	-62.0117	-62.6831	-62.7136							15.6	-58.3801	-57.251	-58.136	-57.7393					15.6	-51.8494	-51.2085	-51.3	-51.0864							15.55	1.90372	0.196182	4.0908	-0.617615	-0.799271	-0.326981	5.7402
15.65	-60.8826	-61.9202	-62.1033	-62.8967	-62.7441							15.65	-58.5022	-57.0984	-57.8613	-58.0444					15.65	-51.9104	-51.2085	-51.5442	-51.2085							15.6	-0.537689	-0.719345	0.12352	1.82379	-0.188919	-0.326981	6.65573
15.7	-61.0046	-62.1338	-62.2864	-63.1409	-62.561							15.7	-58.4106	-56.9458	-58.136	-57.8308					15.7	-51.8188	-50.9949	-51.5137	-51.2085							15.65	-0.842865	0.806534	1.6494	-1.53314	2.55766	0.588547	6.35055
15.75	-61.0046	-61.9812	-62.2253	-62.9272	-62.5915							15.75	-58.2886	-57.1899	-58.1055	-57.9529					15.75	-51.8188	-51.3306	-51.4526	-51.3							15.7	-2.36874	1.72206	1.03905	-1.53314	1.33696	2.4196	5.12985
15.8	-60.8826	-61.8591	-62.0728	-62.9272	-62.7441							15.8	-58.4412	-57.1899	-57.9529	-57.9529					15.8	-51.5747	-51.1475	-51.2695	-51.2085							15.75	-1.14804	2.33241	2.25975	0.908264	-1.40962	-1.54768	0.24704
15.85	-60.8826	-62.0728	-61.9507	-62.7441	-62.6221							15.85	-58.4412	-56.9763	-58.0749	-57.7698					15.85	-51.6968	-51.0254	-51.5442	-51.0864							15.8	0.683014	2.33241	2.56493	0.908264	-1.40962	-4.29427	-4.02542
15.9	-60.73	-62.0422	-62.2559	-62.8662	-62.6221							15.9	-58.3496	-57.0373	-58.1665	-58.0444					15.9	-51.9104	-51.2085	-51.4221	-51.178							15.85	0.98819	0.501358	-1.09718	-3.05902	1.64214	-5.51497	-7.68753
15.95	-60.9436	-61.8286	-62.2559	-62.8967	-62.6526							15.95	-58.2275	-57.0679	-58.136	-57.9834					15.95	-51.8188	-51.2085	-51.3611	-51.3611							15.9	-1.75839	-0.108994	-0.486832	-2.14349	-2.9355	-7.04085	-10.1289
16	-61.0352	-62.1338	-62.1643	-62.9578	-62.4695							16	-58.4717	-57.0373	-57.8003	-57.8308					16	-51.8799	-51.0254	-51.4526	-51.3							15.95	-3.58945	-0.108994	-0.486832	-0.007263	-6.59761	-12.8392	-15.0117
16.05	-61.0046	-61.9812	-62.0117	-62.9883	-62.8052							16.05	-58.4106	-56.8542	-58.2581	-58.136					16.05	-51.6357	-51.178	-51.5747	-51.3306							16	-1.45322	1.41688	1.03905	-3.66937	-7.20796	-19.5531	-24.4722
16.1	-60.9741	-61.8286	-62.2253	-63.0188	-62.7441							16.1	-58.3496	-57.0679	-58.0749	-57.8918					16.1	-51.5137	-51.178	-51.4526	-51.1169							16.05	-1.45322	2.33241	1.03905	-2.75385	-7.81831	-23.5203	-33.3223
16.15	-61.0352	-62.1643	-62.2253	-62.9883	-62.3779							16.15	-58.2581	-57.0068	-57.9834	-57.8918					16.15	-51.7883	-50.9338	-51.239	-51.2085							16.1	-0.537689	1.72206	-1.09718	-3.05902	-16.6684	-28.7083	-39.4258
16.2	-60.9131	-62.0117	-62.1948	-62.8052	-62.7441							16.2	-58.3801	-56.9458	-57.8308	-57.9834					16.2	-51.9409	-51.2695	-51.4832	-51.4221							16.15	0.98819	2.33241	-2.92824	-7.94183	-22.1616	-36.0325	-44.919
16.25	-60.6995	-61.7676	-62.2559	-62.7747	-62.6221							16.25	-58.3496	-56.7932	-58.1665	-57.9834					16.25	-51.7578	-51.1475	-51.5747	-51.3611							16.2	2.51407	3.24794	-2.62306	-8.55218	-25.2133	-45.1878	-56.5157
16.3	-60.73	-62.1643	-62.1033	-62.9578	-62.6221							16.3	-58.2581	-57.0984	-58.1055	-57.9529					16.3	-51.7273	-50.9644	-51.4526	-51.3611							16.25	1.59854	3.55312	-2.31789	-14.9609	-28.5703	-52.2069	-64.4502
16.35	-61.0352	-61.9812	-62.2253	-63.0188	-62.6831							16.35	-58.0749	-57.0068	-57.9529	-58.0139					16.35	-51.6663	-51.2085	-51.3	-51.178							16.3	-1.75839	3.24794	-1.40236	-19.2333	-38.6411	-56.1741	-69.0279
16.4	-61.0657	-61.8896	-62.3474	-62.9883	-62.3779							16.4	-58.3191	-56.8848	-57.8918	-57.8613					16.4	-51.4832	-51.0559	-51.5137	-51.0254							16.35	-2.67392	2.02724	-1.09718	-20.1489	-45.0498	-62.5828	-78.1831
16.45	-60.9741	-61.8286	-62.2559	-62.8967	-62.8662							16.45	-58.3191	-56.9763	-58.1665	-57.9529					16.45	-51.7273	-51.0864	-51.4526	-51.3916							16.4	-2.06357	0.806534	-6.28517	-30.83	-50.2377	-71.4329	-85.2022
16.5	-61.0046	-62.1033	-62.2253	-63.0798	-62.6831							16.5	-58.2275	-57.0679	-58.0139	-58.0139					16.5	-51.8188	-51.178	-51.3306	-51.5137							16.45	-1.75839	-0.108994	-9.33693	-34.4921	-52.6792	-76.9261	-88.2539
16.55	-60.9741	-61.9507	-62.0422	-62.9883	-62.4695							16.55	-58.136	-56.9763	-57.8003	-57.9224					16.55	-51.7578	-50.9033	-51.3	-51.3916							16.5	-0.842865	1.11171	-11.7783	-38.7646	-62.4448	-80.8934	-94.0523
16.6	-60.852	-61.6455	-62.1948	-62.6221	-62.7441							16.6	-58.2886	-56.8848	-57.9224	-57.7698					16.6	-51.7578	-51.1475	-51.5137	-51.5442							16.55	0.683014	-0.108994	-16.0508	-45.4785	-67.9379	-82.4193	-99.8506
16.65	-60.791	-61.9812	-62.3779	-62.7136	-62.4695							16.65	-58.3801	-56.8848	-58.0749	-58.1665					16.65	-51.6357	-51.0559	-51.4221	-51.3							16.6	3.12442	0.196182	-19.7129	-45.7836	-70.6845	-89.1331	-99.5454
16.7	-61.0352	-62.0422	-62.2559	-62.9578	-62.7747							16.7	-58.2886	-57.0373	-58.0749	-57.9529					16.7	-51.4526	-50.9644	-51.3916	-51.2695							16.65	1.59854	-0.414169	-21.544	-54.9389	-71.9052	-92.7952	-106.87
16.75	-61.0657	-61.7371	-62.2864	-63.0798	-62.7136							16.75	-58.0749	-56.9763	-57.8613	-57.7393					16.75	-51.5442	-51.1169	-51.3	-51.4526							16.7	0.072662	0.501358	-26.1216	-57.6855	-78.3139	-95.5418	-110.837
16.8	-61.0352	-61.9202	-62.0728	-62.9883	-62.439							16.8	-58.2275	-56.8848	-58.0444	-57.9834					16.8	-51.7883	-50.9033	-51.5747	-51.6968							16.75	-2.06357	-0.414169	-32.2251	-56.77	-80.7553	-96.7625	-109.006
16.85	-60.8826	-62.0117	-62.1643	-62.9272	-62.8357							16.85	-58.3801	-56.9458	-58.1055	-58.0444					16.85	-51.7883	-51.0254	-51.3611	-51.5442							16.8	-1.75839	0.501358	-35.2769	-64.7045	-82.8916	-98.5936	-118.161
16.9	-60.73	-61.9202	-62.439	-62.8662	-62.7136							16.9	-58.2581	-57.0068	-58.1055	-57.7698					16.9	-51.6357	-51.0864	-51.3611	-51.4832							16.85	-0.842865	-1.02452	-37.1079	-65.6201	-82.5864	-105.002	-120.603
16.95	-61.0657	-61.7981	-62.3169	-62.8052	-62.4084							16.95	-58.2275	-56.8848	-57.8918	-57.8918					16.95	-51.7273	-50.9033	-51.2085	-51.4526							16.9	-1.45322	-4.07628	-37.1079	-68.977	-87.7744	-109.885	-121.213
17	-61.0352	-62.0117	-62.2559	-62.9272	-62.7747							17	-57.9834	-56.8542	-58.0749	-58.0444					17	-51.5747	-50.9644	-51.5442	-51.4526							16.95	-0.842865	-5.90733	-38.6338	-73.8598	-92.0468	-111.106	-127.316
17.05	-60.9436	-61.9812	-62.1033	-62.9578	-62.7441							17.05	-58.2581	-56.8848	-58.2275	-58.0444					17.05	-51.4832	-51.0559	-51.3611	-51.4832							17	-0.842865	-8.95909	-41.3804	-71.4184	-93.5727	-111.106	-127.622
17.1	-60.6995	-61.7371	-62.0728	-62.9578	-62.561							17.1	-58.2581	-56.9763	-58.1055	-57.6477					17.1	-51.6663	-50.8728	-51.3611	-51.5747							17.05	0.683014	-10.1798	-45.958	-75.3857	-92.6572	-113.547	-129.453
17.15	-61.0657	-61.9202	-62.4084	-62.8357	-62.7136							17.15	-58.2275	-56.8542	-57.8613	-58.1055					17.15	-51.7883	-51.1169	-51.1475	-51.6052							17.1	0.072662	-11.4005	-49.9253	-77.8271	-94.1831	-118.735	-135.251
17.2	-60.9741	-61.9507	-62.3474	-62.8357	-62.6526							17.2	-58.0139	-56.8848	-58.0139	-57.9224					17.2	-51.8494	-50.9949	-51.5137	-51.6357							17.15	-2.06357	-14.1471	-50.5357	-75.996	-97.8452	-121.787	-134.03
17.25	-60.73	-61.8286	-62.3474	-62.9578	-62.5							17.25	-58.197	-56.8542	-58.197	-57.9224					17.25	-51.7578	-50.7202	-51.4526	-51.5442							17.2	-3.28427	-16.8937	-53.2822	-78.7426	-99.0659	-122.092	-138.608
17.3	-60.9436	-61.676	-62.2864	-62.9272	-62.8357							17.3	-58.3191	-57.0679	-58.1665	-57.8003					17.3	-51.8494	-51.0864	-51.3916	-51.3611							17.25	-1.75839	-18.7247	-52.6719	-79.6581	-99.0659	-121.177	-141.355
17.35	-61.0046	-62.0422	-62.1643	-62.561	-62.6526							17.35	-58.2581	-56.8542	-58.0139	-58.0444					17.35	-51.6663	-51.0254	-51.1475	-51.239							17.3	-1.14804	-20.8609	-52.6719	-77.2167	-96.6245	-121.177	-140.439
17.4	-60.8215	-61.9507	-62.1643	-62.9883	-62.3779							17.4	-58.1055	-56.8542	-57.9834	-57.9834					17.4	-51.6663	-50.8423	-51.3	-51.4832							17.35	0.98819	-22.692	-52.6719	-79.0478	-102.118	-126.975	-145.017
17.45	-61.0046	-61.7981	-62.3474	-62.8357	-62.7747							17.45	-57.9834	-56.7322	-58.197	-57.8003					17.45	-51.6357	-50.8728	-51.4526	-51.6663							17.4	2.20889	-23.3024	-54.8081	-80.2685	-104.864	-127.585	-147.153
17.5	-60.9741	-61.7371	-62.3779	-62.561	-62.7747							17.5	-58.2275	-56.9763	-58.1055	-57.8918					17.5	-51.8188	-51.0864	-51.3611	-51.5137							17.45	-1.45322	-24.2179	-57.2495	-78.4374	-105.78	-126.975	-145.322
17.55	-60.791	-62.0728	-62.3474	-62.8662	-62.5305							17.55	-58.4412	-56.9763	-57.9834	-58.0139					17.55	-51.9104	-50.8423	-51.3306	-51.5442							17.5	-1.75839	-23.9127	-56.9444	-79.9633	-103.644	-126.059	-147.763
17.6	-61.0352	-61.9202	-62.2559	-62.8967	-62.6831							17.6	-58.197	-56.9763	-57.8613	-57.8918					17.6	-51.9104	-50.7812	-51.0864	-51.5137							17.55	-1.45322	-24.5231	-55.4185	-82.4047	-103.644	-124.839	-151.12
17.65	-60.8826	-61.676	-62.0117	-62.5915	-62.7441							17.65	-58.2275	-56.7627	-58.197	-57.8003					17.65	-51.9409	-51.0559	-51.3611	-51.4526							17.6	2.20889	-25.1334	-53.5874	-80.8788	-107.916	-129.416	-148.984
17.7	-60.8826	-61.8286	-62.1338	-62.9272	-62.5915							17.7	-58.0139	-56.7932	-58.1055	-57.9224					17.7	-51.9104	-50.9033	-51.3611	-51.3							17.65	-2.06357	-26.6593	-52.0615	-79.353	-109.442	-131.858	-149.289
17.75	-60.9436	-62.0728	-62.3474	-62.9272	-62.6221							17.75	-58.3801	-56.9763	-58.0749	-58.0139					17.75	-51.7273	-50.5981	-51.3306	-51.3916							17.7	-1.45322	-26.3541	-52.3667	-83.9306	-107.916	-132.773	-153.867
17.8	-60.6689	-61.8286	-62.3474	-62.6221	-62.7747							17.8	-58.3801	-56.8848	-57.8003	-57.8918					17.8	-51.7883	-50.9949	-51.178	-51.5747							17.75	0.98819	-27.2696	-55.4185	-83.9306	-107	-132.468	-153.867
17.85	-61.0352	-61.6455	-62.2253	-62.8967	-62.7136							17.85	-58.3191	-56.9763	-58.0444	-57.7698					17.85	-51.7883	-50.8728	-51.1475	-51.5442							17.8	1.59854	-28.4903	-55.1133	-78.4374	-106.695	-131.553	-151.73
17.9	-60.852	-61.8591	-62.2253	-62.7136	-62.3779							17.9	-58.2581	-56.6711	-58.197	-57.9529					17.9	-51.8188	-50.7202	-51.4221	-51.5442							17.85	-2.06357	-28.4903	-54.1978	-82.4047	-110.663	-131.247	-157.224
17.95	-60.8826	-61.9812	-62.1338	-62.8662	-62.7441							17.95	-58.136	-56.8848	-57.9834	-58.0139					17.95	-51.9409	-50.8423	-51.2695	-51.4221							17.9	1.29337	-28.7955	-52.0615	-83.3203	-110.357	-134.299	-159.055
18	-60.9436	-61.8591	-62.0728	-62.8662	-62.7747							18	-58.2581	-56.9763	-58.0139	-57.9529					18	-51.9409	-50.9949	-51.2695	-51.4526							17.95	1.59854	-27.88	-55.4185	-82.0995	-109.442	-136.435	-157.224
18.05	-60.6689	-61.554	-62.1643	-62.6221	-62.561							18.05	-58.4412	-57.0373	-57.8003	-57.8003					18.05	-51.9409	-50.8118	-51.0864	-51.3611							18	-1.14804	-27.88	-55.7236	-79.353	-107	-136.13	-159.055
18.1	-61.0046	-61.8286	-62.2559	-62.8967	-62.5915							18.1	-58.3801	-56.8237	-58.0749	-57.9834					18.1	-51.7883	-50.5981	-51.2695	-51.3306							18.05	1.29337	-27.2696	-53.8926	-82.0995	-105.475	-135.52	-163.327
18.15	-60.852	-61.9202	-62.2559	-62.8052	-62.8052							18.15	-58.4106	-56.7322	-58.1055	-57.9834					18.15	-51.8188	-50.9338	-51.4221	-51.3306							18.1	-0.537689	-25.7438	-53.8926	-80.8788	-108.526	-134.604	-165.463
18.2	-60.8826	-61.8896	-62.2253	-62.8052	-62.7136							18.2	-58.136	-57.0068	-58.0444	-57.9529					18.2	-51.6968	-50.8728	-51.4221	-51.4526							18.15	-1.45322	-25.7438	-56.0288	-76.9116	-107.916	-140.403	-163.022
18.25	-60.9741	-61.615	-62.1338	-62.9272	-62.4084							18.25	-58.2275	-57.1594	-57.9529	-57.7393					18.25	-51.6357	-50.7202	-51.3611	-51.5747							18.2	1.59854	-29.711	-53.5874	-80.8788	-105.475	-140.403	-167.905
18.3	-60.6384	-61.676	-61.9507	-62.5305	-62.7747							18.3	-58.4717	-56.9763	-57.8918	-57.8918					18.3	-51.8494	-50.6592	-51.1475	-51.5747							18.25	-2.9791	-31.8473	-51.7564	-80.5737	-103.644	-139.792	-170.041
18.35	-60.9741	-61.8286	-62.0117	-63.0188	-62.7136							18.35	-58.3801	-56.7932	-58.0749	-57.9529					18.35	-51.8494	-50.9033	-51.2695	-51.4832							18.3	-3.28427	-30.0162	-54.1978	-78.7426	-102.423	-137.351	-169.736
18.4	-60.9131	-61.8591	-62.1948	-62.8662	-62.6221							18.4	-58.3801	-56.8542	-58.0444	-57.8918					18.4	-51.8188	-50.7812	-51.5442	-51.5137							18.35	-0.537689	-28.1852	-49.9253	-77.2167	-103.949	-142.234	-169.736
18.45	-60.7605	-61.7065	-62.2864	-62.7441	-62.5							18.45	-58.3191	-57.1289	-58.0749	-57.7393					18.45	-51.7883	-50.6287	-51.3916	-51.5442							18.4	-5.11533	-27.2696	-49.9253	-81.184	-103.949	-142.539	-174.008
18.5	-60.9131	-61.7065	-62.1948	-62.8357	-62.8357							18.5	-58.2886	-57.0373	-57.9224	-57.8003					18.5	-51.5747	-50.6897	-51.3611	-51.3306							18.45	-2.06357	-30.6266	-49.9253	-78.7426	-105.78	-138.572	-174.008
18.55	-60.852	-61.9202	-62.1338	-62.7441	-62.7747							18.55	-58.5022	-57.0068	-57.7393	-57.9529					18.55	-51.7273	-50.9033	-51.178	-51.4221							18.5	-2.06357	-28.4903	-43.8218	-75.6909	-103.949	-141.013	-171.872
18.6	-60.8826	-61.8896	-62.1033	-62.8967	-62.5							18.6	-58.5632	-56.8848	-58.0139	-57.7698					18.6	-51.8799	-50.7812	-51.3611	-51.6052							18.55	-3.58945	-25.4386	-48.0943	-76.3012	-102.118	-141.318	-171.262
18.65	-60.9131	-61.676	-62.0117	-62.8052	-62.6221							18.65	-58.4717	-56.8848	-58.136	-57.8003					18.65	-51.7578	-50.5066	-51.5442	-51.7883							18.6	0.377838	-24.2179	-45.3477	-78.1323	-103.338	-137.351	-175.839
18.7	-60.7605	-61.5234	-61.9202	-62.5915	-62.8052							18.7	-58.5022	-57.0068	-58.0139	-57.6477					18.7	-51.4832	-50.8118	-51.3916	-51.6357							18.65	-4.1998	-25.4386	-43.5166	-75.0805	-106.085	-140.403	-174.619
18.75	-60.9131	-61.8286	-62.0422	-62.9578	-62.7136							18.75	-58.4106	-57.1289	-57.8613	-57.8918					18.75	-51.7578	-50.8423	-51.3611	-51.5137							18.7	-0.842865	-23.3024	-45.3477	-70.5029	-105.475	-140.403	-172.177
18.8	-60.9436	-61.8286	-62.2253	-62.9272	-62.439							18.8	-58.2275	-57.0679	-57.7698	-57.7393					18.8	-51.6663	-50.9033	-51.3	-51.4832							18.75	0.98819	-19.6402	-40.77	-74.165	-104.559	-136.741	-172.788
18.85	-60.791	-61.676	-62.1948	-62.561	-62.7441							18.85	-58.5022	-57.0068	-57.8918	-57.7393					18.85	-51.6052	-50.5371	-51.2695	-51.8494							18.8	-3.58945	-22.692	-45.958	-73.8598	-103.338	-141.623	-176.145
18.9	-60.8826	-61.4624	-62.0728	-62.8662	-62.8052							18.9	-58.6243	-56.8237	-58.1665	-57.5256					18.9	-51.7578	-50.8118	-51.3611	-51.7273							18.85	-0.537689	-21.1661	-43.2114	-71.1132	-101.507	-136.741	-176.45
18.95	-60.8215	-61.6455	-62.2253	-62.8357	-62.7441							18.95	-58.5022	-57.0679	-57.9529	-57.8613					18.95	-51.7273	-50.8423	-51.3916	-51.4832							18.9	-2.06357	-16.5885	-43.8218	-68.3666	-104.254	-138.877	-174.619
19	-60.8215	-61.9202	-62.0728	-62.7441	-62.4695							19	-58.5022	-57.1594	-57.9224	-57.7698					19	-51.5442	-50.8423	-51.3306	-51.6357							18.95	-3.28427	-20.2506	-45.3477	-71.7236	-105.78	-137.351	-178.281
19.05	-60.8215	-61.8286	-61.9812	-62.7747	-62.8662							19.05	-58.3801	-57.1899	-57.8613	-57.7698					19.05	-51.7273	-50.5676	-51.3306	-51.8494							19	-0.537689	-19.9454	-39.5493	-69.8925	-103.644	-134.604	-182.858
19.1	-60.852	-61.615	-62.1338	-62.7747	-62.8967							19.1	-58.2886	-57.0679	-57.9224	-57.6172					19.1	-51.7578	-50.9338	-51.1475	-51.6968							19.05	-2.36874	-15.9781	-44.127	-66.5356	-102.423	-137.351	-186.215
19.15	-60.791	-61.6455	-62.2864	-62.7136	-62.7441							19.15	-58.4106	-56.9458	-57.9834	-57.5867					19.15	-51.4832	-50.9033	-51.178	-51.5747							19.1	-3.58945	-19.3351	-40.4649	-65.3149	-99.0659	-132.163	-188.352
19.2	-60.852	-61.8286	-62.1338	-62.7441	-62.5915							19.2	-58.5632	-56.9763	-58.0139	-57.7698					19.2	-51.7578	-50.7812	-51.3916	-51.7883							19.15	-0.232513	-20.2506	-39.5493	-68.6718	-94.7934	-135.52	-194.15
19.25	-60.9436	-61.7981	-61.8896	-62.8357	-62.8662							19.25	-58.4106	-57.2205	-57.9834	-57.7698					19.25	-51.7578	-50.6287	-51.3611	-51.6968							19.2	-1.14804	-15.3678	-39.5493	-68.0615	-93.8779	-131.858	-203.61
19.3	-60.8215	-61.7371	-62.0728	-62.6831	-62.8967							19.3	-58.4412	-57.1899	-57.9834	-57.7087					19.3	-51.4832	-50.8423	-51.2695	-51.6357							19.25	-2.06357	-19.9454	-34.0562	-64.3994	-94.7934	-135.52	-210.935
19.35	-60.6689	-61.5845	-62.2864	-62.6526	-62.8357							19.35	-58.4106	-57.1289	-57.7698	-57.5256					19.35	-51.8188	-50.8118	-51.239	-51.7883							19.3	0.683014	-20.5558	-37.7183	-62.8735	-92.0468	-133.994	-219.785
19.4	-61.0962	-61.6455	-62.1033	-62.8967	-62.561							19.4	-58.3496	-57.0984	-57.8613	-57.5256					19.4	-51.6663	-50.7507	-51.1169	-51.6663							19.35	0.98819	-16.2833	-35.8872	-67.1459	-90.2158	-134.604	-228.33
19.45	-60.8826	-61.8591	-61.9202	-62.7747	-62.8662							19.45	-58.197	-57.1289	-58.136	-57.8308					19.45	-51.8494	-50.5371	-51.0559	-51.7883							19.4	-1.14804	-18.7247	-31.3096	-65.6201	-86.8588	-138.877	-245.114
19.5	-60.6689	-61.7371	-62.1948	-62.5	-62.9883							19.5	-58.4717	-56.8848	-58.136	-57.7087					19.5	-51.7578	-50.7507	-51.4526	-51.8188							19.45	-0.842865	-19.9454	-33.751	-62.8735	-82.2812	-136.13	-257.016
19.55	-60.9131	-61.7981	-62.2253	-62.8052	-62.8662							19.55	-58.5022	-57.1899	-58.0444	-57.6477					19.55	-51.5137	-50.8728	-51.3611	-51.4526							19.5	2.20889	-16.8937	-30.6992	-60.4321	-81.3657	-141.013	-270.139
19.6	-60.9131	-61.5234	-61.8591	-62.7136	-62.6831							19.6	-58.4412	-57.312	-57.9224	-57.4341					19.6	-51.8799	-50.8118	-51.2085	-51.8188							19.55	-1.14804	-16.2833	-30.6992	-62.5683	-83.1967	-139.182	-282.651
19.65	-60.6384	-61.676	-62.1948	-62.5915	-62.8662							19.65	-58.4106	-57.251	-57.8003	-57.6172					19.65	-51.8188	-50.5371	-51.178	-51.7578							19.6	0.377838	-19.9454	-29.7837	-61.3476	-82.8916	-147.422	-302.182
19.7	-60.8215	-61.8591	-62.1338	-62.6526	-63.0188							19.7	-58.4717	-57.1594	-58.0139	-57.8308					19.7	-51.6968	-50.5981	-51.1169	-51.6052							19.65	4.6503	-17.8092	-25.8164	-58.9062	-80.7553	-148.337	-321.408
19.75	-60.9131	-61.8286	-61.9507	-62.8052	-63.0493							19.75	-58.2581	-57.0984	-58.0444	-57.7698					19.75	-51.8799	-50.8118	-50.9644	-51.7883							19.7	0.98819	-14.1471	-28.563	-54.0234	-81.0605	-154.136	-337.888
19.8	-60.852	-61.7065	-62.2253	-62.7441	-62.7747							19.8	-58.0749	-57.0068	-58.0749	-57.7393					19.8	-51.7273	-50.7202	-51.178	-51.6052							19.75	1.29337	-16.8937	-27.3423	-55.5493	-78.0087	-161.46	-353.452
19.85	-60.73	-61.554	-62.0728	-62.561	-62.8662							19.85	-58.197	-57.2205	-58.0139	-57.6477					19.85	-51.9714	-50.6897	-51.3306	-51.8188							19.8	3.73477	-15.9781	-24.5957	-55.5493	-75.5673	-164.817	-372.067
19.9	-60.9436	-61.676	-62.0422	-62.7747	-63.1103							19.9	-58.4717	-57.3425	-58.0444	-57.5561					19.9	-51.9104	-50.4456	-51.3306	-51.7883							19.85	2.81924	-13.5367	-26.1216	-52.4975	-75.2622	-177.634	-395.566
19.95	-60.852	-61.8896	-62.1643	-62.7136	-62.8967							19.95	-58.4717	-57.2205	-57.8918	-57.7698					19.95	-51.6357	-50.7812	-51.2695	-51.5442							19.9	-0.232513	-12.6212	-25.8164	-47.6147	-78.6191	-181.907	-416.013
20	-60.6995	-61.8286	-61.9507	-62.5915	-62.8052							20	-58.2886	-57.2815	-57.8003	-57.8003					20	-51.9409	-50.7812	-51.178	-51.8494							19.95	0.072662	-14.7574	-21.2388	-46.6992	-80.4501	-193.808	-437.985
20.05	-61.0352	-61.676	-62.1948	-62.6526	-62.6831							20.05	-58.2886	-57.2815	-58.136	-57.8003					20.05	-51.8799	-50.7202	-51.0864	-51.7273							20	4.6503	-12.6212	-23.375	-48.225	-79.8398	-204.795	-458.737
20.1	-60.8215	-61.615	-62.1338	-62.7441	-62.9883							20.1	-58.3191	-57.0984	-58.2581	-57.6477					20.1	-51.5747	-50.5066	-51.0559	-51.6357							20.05	-0.537689	-7.73839	-24.2905	-45.7836	-79.8398	-213.035	-485.593
20.15	-60.8215	-61.615	-62.0117	-62.6831	-62.9272							20.15	-58.197	-56.9458	-58.1055	-57.5867					20.15	-51.8494	-50.6592	-51.239	-51.8799							20.1	-0.232513	-10.1798	-20.0181	-41.8163	-80.4501	-228.904	-514.279
20.2	-60.73	-61.9202	-62.1948	-62.439	-62.9272							20.2	-57.9834	-57.251	-58.1055	-57.7393					20.2	-51.8494	-50.7507	-51.3	-51.6968							20.15	0.98819	-12.0108	-21.544	-38.4594	-79.8398	-238.974	-537.778
20.25	-61.0352	-61.7981	-61.8591	-62.7441	-62.6221							20.25	-58.0749	-57.373	-58.1055	-57.8918					20.25	-51.5747	-50.7202	-51.3916	-51.7578							20.2	3.73477	-9.87462	-22.1543	-41.206	-77.3984	-250.876	-563.107
20.3	-60.9131	-61.7676	-62.1643	-62.6221	-62.8052							20.3	-58.3191	-57.251	-57.9834	-57.7393					20.3	-51.9104	-50.6897	-51.3	-51.8494							20.25	0.072662	-5.60216	-19.4077	-40.5956	-79.5346	-266.135	-583.554
20.35	-60.6995	-61.7676	-62.1948	-62.6221	-63.0493							20.35	-58.2886	-57.251	-57.8308	-57.7698					20.35	-51.7273	-50.3845	-51.2695	-51.7273							20.3	1.29337	-8.04356	-17.2715	-37.2387	-82.5864	-276.206	-609.189
20.4	-61.0352	-61.6455	-62.0117	-62.4695	-62.8967							20.4	-58.2886	-57.2815	-58.0749	-57.5867					20.4	-51.5747	-50.8118	-51.2085	-51.8188							20.35	2.81924	-9.87462	-21.2388	-34.4921	-84.4174	-292.38	-633.603
20.45	-61.0657	-61.5845	-62.1338	-62.8357	-62.8357							20.45	-58.136	-57.1594	-58.2581	-57.4951					20.45	-51.6968	-50.7812	-51.178	-51.8188							20.4	3.4296	-8.34874	-17.2715	-35.1025	-85.0278	-309.775	-654.965
20.5	-60.8826	-61.8591	-62.0117	-62.6831	-62.6526							20.5	-58.2581	-57.0373	-58.2275	-57.8003					20.5	-51.8188	-50.7202	-51.239	-51.8188							20.45	0.377838	-5.90733	-13.9146	-37.8491	-86.5537	-321.372	-674.191
20.55	-60.7605	-61.8286	-62.1948	-62.5915	-62.8967							20.55	-58.0139	-57.251	-58.0749	-57.8003					20.55	-51.6663	-50.5981	-51.3306	-51.7273							20.5	0.683014	-6.82286	-16.9663	-35.7128	-88.0795	-343.65	-691.281
20.6	-61.1267	-61.8896	-62.1948	-62.5	-62.9578							20.6	-57.9224	-57.4036	-58.0444	-57.6782					20.6	-51.5442	-50.5371	-51.4526	-51.9409							20.55	4.03995	-10.485	-16.356	-34.4921	-89.9106	-361.35	-709.897
20.65	-61.0657	-61.5845	-61.8591	-62.7747	-62.8052							20.65	-58.0444	-57.4646	-58.1055	-57.7087					20.65	-51.7883	-50.8118	-51.3611	-51.7578							20.6	1.29337	-8.65391	-11.4732	-32.9662	-92.352	-374.778	-730.954
20.7	-60.852	-61.554	-62.1338	-62.7136	-62.6831							20.7	-58.2886	-57.312	-58.0139	-57.6172					20.7	-51.6968	-50.7507	-51.3916	-51.8188							20.65	0.683014	-6.51769	-14.2197	-35.1025	-98.7607	-398.276	-747.434
20.75	-60.852	-61.7371	-62.0728	-62.4084	-62.5305							20.75	-58.0749	-57.3425	-57.9529	-57.6172					20.75	-51.4832	-50.7507	-51.3611	-51.9409							20.7	1.29337	-4.38145	-12.999	-37.2387	-104.864	-414.45	-761.167
20.8	-61.1572	-61.9507	-61.8896	-62.5915	-62.7747							20.8	-58.0444	-57.4341	-58.1055	-57.7087					20.8	-51.7883	-50.6592	-51.239	-51.8799							20.75	5.26065	-8.34874	-10.2525	-36.018	-110.357	-428.183	-773.374
20.85	-61.0352	-61.8286	-62.1948	-62.7136	-62.8967							20.85	-57.8003	-57.312	-58.2581	-57.8613					20.85	-51.6968	-50.4456	-51.1169	-51.6052							20.8	1.29337	-6.82286	-10.2525	-34.7973	-115.545	-448.63	-784.055
20.9	-60.8215	-61.7676	-62.1033	-62.6831	-62.7747							20.9	-58.136	-57.1594	-58.2581	-57.6782					20.9	-51.4832	-50.7202	-51.3611	-52.0019							20.85	0.072662	-5.90733	-12.0835	-31.7455	-118.597	-464.194	-797.788
20.95	-60.9131	-61.7065	-61.9507	-62.439	-62.6831							20.95	-58.1055	-57.2205	-58.0444	-57.6782					20.95	-51.5747	-50.8118	-51.3306	-51.9409							20.9	0.377838	-2.85558	-9.64211	-34.4921	-128.363	-477.317	-810.605
21	-61.0657	-61.5845	-62.1643	-62.561	-62.5305							21	-58.0139	-57.4341	-58.1055	-57.5256					21	-51.6357	-50.7202	-51.4832	-51.6663							20.95	3.12442	-4.38145	-6.89552	-36.018	-137.518	-496.238	-820.676
21.05	-61.0352	-61.5845	-62.1338	-62.6831	-62.7136							21.05	-57.7393	-57.5561	-58.1055	-57.4646					21.05	-51.5137	-50.6592	-51.4221	-51.8799							21	-0.537689	-6.21251	-9.94728	-34.4921	-142.706	-508.75	-832.272
21.1	-60.791	-61.7371	-61.8896	-62.6526	-62.8052							21.1	-58.1055	-57.4341	-57.9834	-57.6172					21.1	-51.3916	-50.4456	-51.4221	-51.9714							21.05	-2.06357	-5.29698	-8.72658	-33.2714	-146.368	-522.788	-842.954
21.15	-60.9741	-61.7676	-62.2559	-62.5	-62.6526							21.15	-57.9529	-57.4036	-57.8613	-57.7698					21.15	-51.6663	-50.5981	-51.1475	-51.9409							21.1	-1.14804	-3.7711	-5.67482	-29.9145	-157.965	-542.319	-855.161
21.2	-61.0657	-61.676	-62.1948	-62.6221	-62.7136							21.2	-57.7698	-57.3425	-58.0139	-57.6477					21.2	-51.6052	-50.8118	-51.239	-51.7273							21.15	0.377838	-0.719345	-6.89552	-31.4404	-167.425	-555.137	-868.283
21.25	-61.0962	-61.676	-61.9202	-62.6831	-62.5305							21.25	-58.0444	-57.251	-58.2275	-57.6172					21.25	-51.4832	-50.8118	-51.5137	-51.9714							21.2	-1.75839	-4.38145	-8.4214	-33.8818	-173.529	-568.259	-883.237
21.3	-60.852	-61.4929	-62.1948	-62.7441	-62.5305							21.3	-58.0139	-57.312	-58.2581	-57.6172					21.3	-51.5137	-50.7202	-51.4221	-52.0019							21.25	-2.67392	-4.38145	-7.2007	-33.5766	-184.21	-587.79	-895.444
21.35	-60.9741	-61.3098	-62.1948	-62.4695	-62.8052							21.35	-57.7393	-57.4341	-58.136	-57.5256					21.35	-51.6052	-50.5676	-51.3306	-51.7578							21.3	-1.45322	-3.16075	-3.84376	-31.1352	-195.196	-601.523	-907.346
21.4	-61.1267	-61.5234	-61.9202	-62.5915	-62.7441							21.4	-57.9834	-57.4646	-58.0444	-57.4646					21.4	-51.5747	-50.5066	-51.2085	-51.8494							21.35	3.12442	-0.719345	-7.81105	-29.3041	-203.436	-610.679	-916.806
21.45	-61.0962	-61.7371	-62.2253	-62.6526	-62.8357							21.45	-57.9224	-57.312	-58.197	-57.6172					21.45	-51.3916	-50.6592	-51.3916	-51.9714							21.4	0.683014	1.72206	-9.64211	-28.999	-215.643	-629.905	-925.046
21.5	-60.9131	-61.676	-62.1338	-62.6831	-62.5915							21.5	-57.7698	-57.312	-58.0749	-57.8003					21.5	-51.5747	-50.7507	-51.3916	-51.9714							21.45	-0.842865	-1.94005	-5.36964	-32.0507	-226.324	-643.332	-936.643
21.55	-61.0352	-61.6455	-62.0422	-62.5	-62.439							21.55	-57.9834	-57.4951	-57.8613	-57.7087					21.55	-51.5442	-50.6897	-51.1169	-51.7273							21.5	0.683014	-1.3297	-4.14894	-32.9662	-232.733	-651.572	-948.544
21.6	-61.1572	-61.554	-62.0117	-62.6221	-62.7136							21.6	-57.8003	-57.4341	-58.0139	-57.6477					21.6	-51.5137	-50.6592	-51.3306	-52.0019							21.55	2.81924	-2.24522	-6.89552	-31.4404	-247.381	-667.136	-958.005
21.65	-61.0352	-61.3708	-62.2864	-62.7136	-62.8052							21.65	-57.7698	-57.2205	-58.2886	-57.6172					21.65	-51.3	-50.6592	-51.3916	-51.9104							21.6	3.12442	1.11171	-6.28517	-31.1352	-255.621	-678.122	-965.329
21.7	-61.0046	-61.3708	-62.1338	-62.6221	-62.7136							21.7	-57.9834	-57.5561	-58.197	-57.6782					21.7	-51.6968	-50.5066	-51.0254	-51.8188							21.65	-1.14804	2.63759	-1.70754	-29.9145	-260.199	-686.057	-973.264
21.75	-60.9436	-61.554	-61.8591	-62.6221	-62.7136							21.75	-57.7087	-57.4036	-58.0749	-57.4646					21.75	-51.5747	-50.7202	-51.3611	-51.6968							21.7	0.377838	-0.108994	-3.23341	-32.6611	-273.016	-698.264	-977.536
21.8	-61.1572	-61.4929	-62.2559	-62.5305	-62.561							21.8	-58.0139	-57.1899	-57.9224	-57.6172					21.8	-51.4832	-50.8118	-51.3306	-52.0019							21.75	0.683014	-2.5504	-5.67482	-35.7128	-278.204	-710.471	-981.198
21.85	-61.1572	-61.5234	-62.2559	-62.6831	-62.3779							21.85	-57.8613	-57.5256	-58.1055	-57.7698					21.85	-51.239	-50.7202	-50.9644	-51.9104							21.8	3.73477	-1.63487	-3.23341	-36.9335	-288.275	-718.406	-987.607
21.9	-61.0352	-61.1572	-62.0728	-62.6831	-62.6831							21.9	-57.8003	-57.4951	-58.197	-57.8308					21.9	-51.6052	-50.7202	-51.3916	-51.7578							21.85	-0.232513	1.11171	0.428696	-37.8491	-299.261	-726.34	-994.626
21.95	-60.852	-61.4929	-62.1033	-62.6526	-62.8052							21.95	-57.8613	-57.1289	-58.0139	-57.7698					21.95	-51.5747	-50.5981	-51.2695	-51.7883							21.9	-2.06357	2.33241	-2.62306	-38.4594	-302.618	-740.073	-999.814
22	-61.0962	-61.4929	-62.3169	-62.5915	-62.7441							22	-57.7698	-57.6477	-57.8918	-57.8003					22	-51.3916	-50.5981	-51.0254	-51.9714							21.95	-2.36874	-1.02452	-2.31789	-36.6284	-315.13	-748.618	-1001.34
22.05	-61.1877	-61.4319	-62.2253	-62.5305	-62.7747							22.05	-57.8918	-57.4646	-58.0749	-57.8003					22.05	-51.2085	-50.7812	-51.2695	-51.9104							22	0.377838	-2.5504	-0.486832	-39.3749	-322.149	-753.501	-1003.78
22.1	-61.1267	-61.3708	-61.9812	-62.6831	-62.561							22.1	-57.9224	-57.4036	-58.0749	-57.7393					22.1	-51.6052	-50.8118	-51.0254	-51.6052							22.05	1.29337	-0.719345	2.56493	-43.6474	-330.084	-766.623	-1005.31
22.15	-60.9436	-61.554	-62.3169	-62.6221	-62.5							22.15	-57.5867	-57.5256	-57.8918	-57.5561					22.15	-51.4832	-50.8118	-51.2695	-51.7273							22.1	-3.28427	-0.719345	-0.486832	-45.1733	-341.375	-775.168	-1005.61
22.2	-61.0046	-61.3708	-62.2864	-62.6526	-62.5915							22.2	-57.8918	-57.312	-57.9834	-57.7087					22.2	-51.3916	-50.7507	-51.3	-51.8799							22.15	-3.89462	1.41688	-0.486832	-47.9199	-345.953	-782.187	-1007.14
22.25	-61.2488	-61.3403	-62.0728	-62.5	-62.8052							22.25	-57.8613	-57.5867	-58.1055	-57.8613					22.25	-51.1475	-50.8118	-50.9644	-51.8494							22.2	-2.36874	1.11171	1.34422	-47.3095	-358.77	-790.732	-1012.02
22.3	-61.0657	-61.5234	-62.1948	-62.5305	-62.7136							22.3	-57.7087	-57.5256	-57.8918	-58.0749					22.3	-51.5137	-50.5981	-51.3611	-51.6357							22.25	0.377838	-1.63487	3.48045	-47.3095	-366.705	-802.634	-1016.9
22.35	-61.0046	-61.3403	-62.3169	-62.6526	-62.7441							22.35	-57.9529	-57.3425	-57.9529	-57.9529					22.35	-51.3916	-50.5676	-51.1169	-51.8188							22.3	-1.14804	-1.02452	-0.486832	-51.582	-370.672	-810.569	-1019.04
22.4	-60.9131	-61.4319	-62.2864	-62.6526	-62.7441							22.4	-57.8308	-57.7393	-57.9834	-57.8308					22.4	-51.3916	-50.8423	-51.239	-51.9104							22.35	-4.50497	-0.414169	-0.486832	-57.3803	-383.49	-816.977	-1021.79
22.45	-61.1572	-61.4319	-61.9812	-62.6526	-62.561							22.45	-57.6477	-57.4951	-57.8308	-57.9529					22.45	-51.0864	-50.9033	-51.3	-51.8799							22.4	-3.58945	2.63759	1.34422	-61.6528	-390.204	-827.964	-1023.62
22.5	-61.1572	-61.1572	-62.2864	-62.3169	-62.561							22.5	-58.0444	-57.5561	-58.0749	-57.8918					22.5	-51.4221	-50.8423	-51.0559	-51.5442							22.45	-2.36874	4.77382	3.17528	-63.789	-393.56	-836.203	-1024.84
22.55	-61.0962	-61.4929	-62.2559	-62.561	-62.7136							22.55	-57.8308	-57.5867	-58.0139	-57.8308					22.55	-51.4526	-50.9033	-51.3306	-51.7883							22.5	0.377838	4.77382	-0.486832	-67.1459	-405.157	-842.002	-1026.67
22.6	-61.0046	-61.4319	-62.2559	-62.7136	-62.8662							22.6	-57.5867	-57.4036	-57.7698	-57.7393					22.6	-51.3916	-50.8423	-51.3611	-51.9104							22.55	-1.75839	1.72206	-1.70754	-67.4511	-412.481	-847.8	-1028.2
22.65	-61.0046	-61.3403	-61.9507	-62.6831	-62.7441							22.65	-57.8918	-57.8003	-58.197	-57.7087					22.65	-51.1475	-50.7812	-51.0864	-51.8494							22.6	-3.89462	1.41688	0.733871	-67.4511	-416.143	-856.65	-1031.86
22.7	-61.2488	-61.4929	-62.3779	-62.5305	-62.7441							22.7	-57.8003	-57.5867	-57.9224	-57.9224					22.7	-51.3306	-50.6897	-51.3916	-51.6663							22.65	-3.89462	1.41688	2.8701	-71.7236	-429.266	-860.923	-1036.44
22.75	-61.2488	-61.0657	-62.2864	-62.2864	-62.7747							22.75	-57.5256	-57.5256	-57.9224	-58.0139					22.75	-51.4832	-50.7812	-51.2695	-51.6663							22.7	-2.67392	3.55312	0.733871	-76.3012	-436.285	-863.059	-1040.1
22.8	-61.1877	-61.615	-62.1948	-62.561	-62.7441							22.8	-57.8308	-57.7393	-57.9834	-58.0139					22.8	-51.3916	-50.9644	-51.1169	-51.9104							22.75	-0.232513	4.46864	-0.181656	-77.2167	-439.642	-869.773	-1041.32
22.85	-61.1267	-61.3403	-62.1033	-62.6526	-62.439							22.85	-57.8003	-57.6172	-57.8308	-58.0139					22.85	-51.3	-50.9949	-51.3916	-51.8494							22.8	-0.842865	4.16347	0.12352	-75.996	-450.934	-874.045	-1042.23
22.9	-61.0352	-61.4014	-62.3779	-62.5305	-62.6221							22.9	-57.5867	-57.6477	-58.1055	-58.136					22.9	-51.1475	-50.9949	-51.3306	-51.8188							22.85	-3.89462	1.72206	2.8701	-77.5219	-458.868	-876.487	-1044.06
22.95	-61.2488	-61.4014	-62.2559	-62.439	-62.8967							22.95	-57.8308	-57.8003	-57.9529	-57.9529					22.95	-51.5442	-50.9033	-51.239	-51.7273							22.9	-2.9791	0.806534	1.34422	-76.6064	-461.615	-874.961	-1046.2
23	-61.2488	-61.1877	-62.1643	-62.2864	-62.8357							23	-57.8308	-57.7087	-57.7393	-57.8918					23	-51.3916	-50.9338	-51.3916	-51.6663							22.95	-2.36874	1.41688	-1.09718	-75.3857	-470.77	-882.285	-1046.81
23.05	-61.2488	-61.4319	-62.2253	-62.5	-62.6221							23.05	-57.7087	-57.7393	-58.1055	-57.8613					23.05	-51.3611	-50.7202	-51.3	-51.8494							23	-1.75839	1.11171	-0.181656	-74.7753	-478.094	-887.168	-1048.34
23.1	-61.1572	-61.3098	-62.3779	-62.5915	-62.7136							23.1	-57.6477	-57.8003	-57.9529	-58.1665					23.1	-51.3	-50.8728	-51.1475	-51.7883							23.05	0.683014	2.63759	0.428696	-77.5219	-481.451	-887.778	-1052.91
23.15	-60.9131	-61.3708	-62.2559	-62.561	-62.7747							23.15	-57.9834	-57.7698	-57.8003	-58.0749					23.15	-51.4526	-50.8423	-51.5747	-51.7883							23.1	-1.75839	4.77382	3.48045	-79.6581	-485.113	-887.778	-1058.41
23.2	-61.3098	-61.5234	-62.1338	-62.5915	-62.7136							23.2	-57.8003	-57.8613	-58.0749	-58.1055					23.2	-51.5747	-50.9338	-51.3306	-51.5747							23.15	-2.9791	2.63759	0.12352	-79.6581	-493.658	-895.408	-1063.6
23.25	-61.3708	-61.1877	-62.1948	-62.4695	-62.4695							23.25	-57.4951	-57.9224	-57.9834	-57.8613					23.25	-51.4832	-50.9949	-51.0559	-51.7273							23.2	-2.06357	-0.108994	-0.792007	-78.4374	-497.625	-897.544	-1066.95
23.3	-61.3098	-61.4624	-62.3474	-62.1948	-62.561							23.3	-57.8918	-57.8613	-57.8613	-58.197					23.3	-51.5137	-50.9338	-51.5747	-51.8494							23.25	-0.232513	-0.414169	-1.40236	-77.8271	-498.236	-899.375	-1069.39
23.35	-61.1572	-61.3098	-62.3779	-62.4084	-62.7747							23.35	-57.8003	-57.7698	-58.0749	-58.136					23.35	-51.3916	-50.9644	-51.4832	-51.7883							23.3	2.81924	2.02724	1.34422	-75.6909	-506.781	-899.985	-1072.14
23.4	-61.0046	-61.3098	-62.1643	-62.5305	-62.8662							23.4	-57.6782	-58.0749	-57.9224	-58.136					23.4	-51.6357	-50.9033	-51.1475	-51.7578							23.35	2.81924	2.02724	0.733871	-74.7753	-511.358	-908.225	-1075.5
23.45	-61.2488	-61.4929	-62.2253	-62.4695	-62.6526							23.45	-57.6172	-57.9224	-57.9224	-57.9529					23.45	-51.5442	-50.9033	-51.4221	-51.5137							23.4	-0.842865	3.24794	-1.40236	-75.3857	-513.189	-911.277	-1076.41
23.5	-61.4014	-61.2488	-62.3474	-62.5	-62.7136							23.5	-57.8613	-57.8003	-58.0749	-58.3191					23.5	-51.6052	-50.6897	-51.4221	-51.6357							23.45	-1.75839	3.85829	-0.792007	-78.4374	-517.462	-913.413	-1077.63
23.55	-61.2488	-61.4014	-62.2559	-62.2864	-62.6831							23.55	-57.8613	-58.0749	-57.9834	-58.2275					23.55	-51.5137	-50.7812	-51.3	-51.8188							23.5	-0.232513	2.94276	0.428696	-80.5737	-525.396	-916.159	-1079.16
23.6	-61.3403	-61.4014	-62.2253	-62.2559	-62.5305							23.6	-57.5867	-58.1055	-57.8003	-58.0139					23.6	-51.4221	-50.9033	-51.3	-51.6968							23.55	1.59854	0.806534	2.8701	-84.2358	-528.753	-925.01	-1078.55
23.65	-61.2488	-61.2488	-62.1643	-62.439	-62.7747							23.65	-57.8003	-57.8308	-58.1665	-58.2581					23.65	-51.6052	-50.9949	-51.4526	-51.6663							23.6	3.4296	-0.719345	1.6494	-86.6772	-529.669	-928.977	-1080.38
23.7	-61.0352	-61.3708	-62.3169	-62.561	-62.8052							23.7	-57.7698	-58.1055	-58.0749	-58.2581					23.7	-51.6052	-50.8728	-51.4221	-51.3916							23.65	1.59854	-0.414169	0.428696	-86.6772	-536.688	-932.029	-1081.6
23.75	-61.2488	-61.3098	-62.2253	-62.3779	-62.7747							23.75	-57.8003	-58.0139	-57.8003	-57.9834					23.75	-51.6052	-50.9644	-51.1169	-51.5137							23.7	-1.14804	-0.719345	0.428696	-87.5927	-541.571	-933.86	-1082.21
23.8	-61.3098	-61.0962	-62.1948	-62.4695	-62.5915							23.8	-57.5256	-58.0444	-58.0749	-58.3496					23.8	-51.5137	-50.6897	-51.3916	-51.8494							23.75	-1.75839	0.806534	1.6494	-90.9496	-543.097	-942.71	-1083.13
23.85	-61.2793	-61.4319	-62.1033	-62.2864	-62.6526							23.85	-57.8613	-57.8918	-58.0749	-58.2275					23.85	-51.3	-50.7812	-51.3611	-51.6357							23.8	-1.45322	2.33241	4.0908	-96.1376	-543.707	-947.593	-1082.82
23.9	-61.3098	-61.3098	-62.2253	-62.2253	-62.7747							23.9	-57.7698	-58.2581	-57.9224	-58.0749					23.9	-51.5442	-51.0254	-51.2085	-51.6052							23.85	-0.842865	3.55312	1.34422	-96.4428	-551.031	-950.034	-1081.91
23.95	-61.1572	-61.0657	-62.2864	-62.4084	-62.7441							23.95	-57.7087	-58.1055	-57.8918	-58.2581					23.95	-51.6968	-50.9338	-51.239	-51.4832							23.9	1.29337	1.41688	-1.70754	-97.3583	-554.083	-949.729	-1080.99
24	-61.0352	-61.4319	-62.2559	-62.4695	-62.3779							24	-57.5867	-58.0139	-58.0444	-58.197					24	-51.6663	-50.8728	-51.3916	-51.3916							23.95	2.81924	0.501358	-0.181656	-95.2221	-555.609	-955.527	-1081.3
24.05	-61.3708	-61.3708	-62.0728	-62.4695	-62.8357							24.05	-57.8613	-58.197	-58.136	-58.2886					24.05	-51.5442	-50.7812	-51.3611	-51.6968							24	0.683014	1.72206	0.733871	-100.715	-557.135	-959.189	-1080.08
24.1	-61.4624	-61.0352	-62.1033	-62.4084	-62.7441							24.1	-57.7698	-58.2275	-57.8003	-58.3191					24.1	-51.239	-51.0864	-51.0254	-51.6052							24.05	-2.06357	0.806534	2.8701	-102.241	-565.985	-960.41	-1080.08
24.15	-61.2793	-61.3098	-62.2864	-62.2559	-62.5							24.15	-57.6477	-58.1055	-58.1055	-58.0444					24.15	-51.5747	-50.9644	-51.3916	-51.5442							24.1	-2.67392	1.72206	0.428696	-100.41	-568.731	-958.274	-1081.91
24.2	-61.3403	-61.3708	-62.1643	-62.0422	-62.7747							24.2	-57.6782	-57.9834	-58.0444	-58.4106					24.2	-51.6968	-50.6592	-51.3306	-51.5442							24.15	-1.75839	1.72206	-2.31789	-101.326	-570.257	-957.663	-1085.57
24.25	-61.2183	-61.2488	-62.1338	-62.1643	-62.7136							24.25	-57.8308	-58.2886	-57.9834	-58.2275					24.25	-51.6663	-51.0254	-51.2695	-51.4221							24.2	-0.842865	1.72206	-0.486832	-106.208	-573.004	-961.326	-1088.31
24.3	-61.0962	-61.1877	-61.9507	-62.3474	-62.439							24.3	-57.7393	-58.2581	-57.9224	-58.136					24.3	-51.5137	-51.0559	-51.0864	-51.4832							24.25	-0.842865	0.806534	-0.792007	-104.683	-580.328	-960.715	-1088.93
24.35	-61.1877	-61.2488	-62.1643	-62.4084	-62.8357							24.35	-57.6172	-58.1055	-58.1665	-58.3801					24.35	-51.4832	-50.7507	-51.4526	-51.6968							24.3	-0.537689	1.41688	0.428696	-103.157	-583.685	-959.189	-1089.54
24.4	-61.3708	-61.1877	-62.2559	-62.2864	-62.6221							24.4	-57.6477	-58.197	-58.0444	-58.2581					24.4	-51.3611	-51.0254	-51.3611	-51.6968							24.35	-3.58945	0.196182	1.6494	-108.039	-586.432	-955.832	-1089.84
24.45	-61.4624	-61.1572	-62.2253	-62.4084	-62.561							24.45	-57.8003	-58.2581	-57.9834	-58.2275					24.45	-51.6968	-50.9644	-51.1169	-51.6357							24.4	-4.81015	-0.719345	-0.181656	-106.208	-587.957	-957.969	-1095.33
24.5	-61.3403	-61.3403	-62.1033	-62.2559	-62.6526							24.5	-57.7698	-58.2581	-58.0749	-58.4412					24.5	-51.6357	-50.6897	-51.1475	-51.4526							24.45	-5.72568	-0.414169	-1.09718	-105.598	-594.366	-959.8	-1096.25
24.55	-61.3403	-61.1877	-61.9202	-62.1033	-62.4695							24.55	-57.4951	-57.9834	-58.197	-58.2275					24.55	-51.5442	-51.0254	-51.4221	-51.3916							24.5	-3.89462	-0.108994	-1.09718	-107.734	-598.028	-958.579	-1097.17
24.6	-61.1572	-61.0352	-62.2559	-62.1338	-62.7441							24.6	-57.6782	-58.2581	-58.0749	-58.3191					24.6	-51.6052	-50.9033	-51.3306	-51.5747							24.55	-2.06357	1.72206	0.428696	-104.988	-598.028	-956.138	-1095.33
24.65	-61.0657	-61.3708	-62.2253	-62.4084	-62.7136							24.65	-57.8003	-58.2275	-57.8918	-58.3801					24.65	-51.3611	-50.8118	-50.9949	-51.6663							24.6	-1.75839	1.72206	2.25975	-106.208	-600.164	-954.917	-1101.13
24.7	-61.2488	-61.3098	-62.1948	-62.4084	-62.3779							24.7	-57.7698	-58.1055	-58.1665	-58.2886					24.7	-51.4832	-51.0559	-51.2695	-51.6357							24.65	-0.232513	2.63759	2.8701	-107.429	-606.573	-956.138	-1102.05
24.75	-61.4014	-61.0046	-62.0728	-62.3169	-62.6831							24.75	-57.6172	-57.9529	-58.197	-58.197					24.75	-51.5747	-50.7812	-51.4526	-51.5747							24.7	-1.75839	3.55312	-0.181656	-102.546	-609.015	-956.138	-1099.3
24.8	-61.4014	-61.3708	-62.0117	-62.2559	-62.5305							24.8	-57.6172	-58.2886	-58.0444	-58.4412					24.8	-51.7578	-50.9949	-51.3306	-51.5442							24.75	-4.1998	5.07899	-0.792007	-107.429	-607.794	-955.832	-1101.74
24.85	-61.2488	-61.2488	-62.1948	-62.4084	-62.5915							24.85	-57.8918	-58.197	-58.0139	-58.2886					24.85	-51.6052	-50.9644	-51.0864	-51.4221							24.8	-4.1998	4.46864	-0.792007	-104.988	-607.794	-952.17	-1103.27
24.9	-61.2793	-61.1572	-62.2253	-62.2253	-62.6526							24.9	-57.8003	-58.136	-58.2581	-58.3191					24.9	-51.6663	-50.7812	-51.239	-51.5137							24.85	-4.1998	3.55312	1.34422	-103.767	-613.592	-950.644	-1101.44
24.95	-61.2793	-61.1267	-62.1338	-62.0422	-62.2864							24.95	-57.6477	-57.9224	-58.136	-58.5022					24.95	-51.4832	-51.0559	-51.3306	-51.6663							24.9	-4.1998	2.33241	4.0908	-106.514	-614.508	-954.306	-1100.22
25	-61.0352	-61.3098	-62.0117	-62.1338	-62.7136							25	-57.5256	-58.3496	-58.0749	-58.3801					25	-51.4832	-50.8728	-51.239	-51.6663							24.95	-2.36874	0.806534	3.17528	-101.936	-613.897	-956.748	-1102.35
25.05	-61.2793	-61.2793	-61.9507	-62.3779	-62.5915							25.05	-57.8308	-58.1665	-58.0444	-58.1665					25.05	-51.6357	-50.8423	-51.0559	-51.6357							25	-0.842865	2.33241	1.03905	-106.819	-611.456	-957.969	-1099.3
25.1	-61.4014	-61.0962	-62.2253	-62.4695	-62.4084							25.1	-57.7698	-58.1055	-58.2581	-58.5327					25.1	-51.7273	-50.9949	-51.1475	-51.4526							25.05	0.98819	3.85829	0.12352	-105.903	-614.813	-957.969	-1098.08
25.15	-61.4014	-61.3098	-62.1643	-62.2253	-62.5915							25.15	-57.7393	-57.9529	-58.1665	-58.4717					25.15	-51.6357	-50.6897	-51.2085	-51.2695							25.1	2.20889	3.55312	1.34422	-102.241	-617.56	-958.274	-1098.69
25.2	-61.3403	-61.2793	-62.1338	-62.3474	-62.561							25.2	-57.4951	-58.2886	-58.0444	-58.3496					25.2	-51.7578	-50.9644	-51.178	-51.3							25.15	0.072662	2.94276	1.95457	-107.124	-616.339	-964.072	-1093.5
25.25	-61.0352	-61.0657	-62.0422	-62.2253	-62.5305							25.25	-57.7698	-58.0749	-57.9529	-58.4717					25.25	-51.6052	-50.9338	-50.9338	-51.5137							25.2	-1.75839	3.85829	5.31151	-106.819	-613.592	-967.429	-1094.72
25.3	-61.2183	-61.2793	-61.9507	-62.1033	-62.6526							25.3	-57.8308	-58.136	-58.3496	-58.5022					25.3	-51.3916	-50.5981	-50.9949	-51.5442							25.25	-0.537689	5.07899	6.83739	-107.124	-614.203	-968.955	-1093.2
25.35	-61.4624	-61.3708	-62.0728	-62.2559	-62.561							25.35	-57.7698	-57.9224	-58.1665	-58.3801					25.35	-51.5137	-50.9644	-51.1475	-51.4221							25.3	-0.537689	5.38417	5.61668	-109.26	-617.254	-969.565	-1087.7
25.4	-61.3708	-61.2183	-62.2253	-62.4084	-62.6526							25.4	-57.5561	-58.2275	-58.197	-58.2886					25.4	-51.7273	-50.8728	-50.9949	-51.5137							25.35	-0.842865	5.68935	2.56493	-108.345	-616.034	-968.65	-1088.62
25.45	-61.0962	-60.9436	-62.1948	-62.4695	-62.6221							25.45	-57.5867	-58.136	-57.9529	-58.6243					25.45	-51.8188	-50.5981	-50.9644	-51.3916							25.4	-0.842865	5.07899	2.25975	-110.786	-613.592	-972.617	-1088.31
25.5	-61.3403	-61.3098	-62.1643	-62.0728	-62.5							25.5	-57.8308	-58.1055	-58.3191	-58.5022					25.5	-51.6663	-50.9033	-50.7812	-51.2695							25.45	-0.537689	2.94276	2.56493	-112.617	-610.235	-975.364	-1082.82
25.55	-61.4319	-61.2793	-62.0117	-62.1338	-62.5305							25.55	-57.7698	-57.9529	-58.2886	-58.3191					25.55	-51.7578	-50.8423	-51.0559	-51.1475							25.5	0.072662	0.806534	3.48045	-108.345	-613.592	-975.669	-1084.65
25.6	-61.2793	-61.0962	-61.8591	-62.3169	-62.6831							25.6	-57.7393	-58.1665	-58.197	-58.4412					25.6	-51.7273	-50.6897	-50.9338	-51.3611							25.55	-1.75839	-0.414169	3.17528	-111.702	-614.508	-973.838	-1084.35
25.65	-61.1877	-61.0962	-62.2253	-62.2864	-62.561							25.65	-57.4341	-58.1665	-58.0444	-58.6243					25.65	-51.6357	-50.8728	-50.9338	-51.4221							25.6	-4.50497	-1.02452	2.56493	-113.533	-614.203	-970.176	-1080.38
25.7	-61.4014	-61.3403	-62.2864	-62.0728	-62.5							25.7	-57.6477	-58.197	-58.3191	-58.4717					25.7	-51.5137	-50.8118	-50.7507	-51.4221							25.65	-4.50497	-1.3297	1.03905	-111.091	-614.508	-970.786	-1085.26
25.75	-61.2793	-61.2793	-62.1643	-62.3169	-62.6221							25.75	-57.8613	-58.0444	-58.3191	-58.2581					25.75	-51.6968	-50.5981	-50.9338	-51.3306							25.7	-3.28427	-1.02452	-1.70754	-112.922	-616.644	-972.007	-1085.87
25.8	-61.3098	-61.0046	-62.0422	-62.3169	-62.6831							25.8	-57.6172	-58.1055	-58.3191	-58.5632					25.8	-51.8494	-50.7507	-51.0864	-51.3611							25.75	-1.45322	-0.719345	-2.01271	-115.059	-623.663	-972.312	-1084.04
25.85	-61.3098	-61.1877	-62.0728	-61.9812	-62.3474							25.85	-57.6172	-58.3496	-58.136	-58.6243					25.85	-51.7883	-50.8423	-50.9644	-51.2695							25.8	0.377838	-0.108994	-1.70754	-112.922	-626.715	-971.396	-1088.01
25.9	-61.1267	-61.3098	-61.9202	-62.439	-62.7441							25.9	-57.4646	-58.136	-58.1665	-58.5632					25.9	-51.6357	-50.7202	-50.8728	-51.178							25.85	-2.9791	0.501358	-0.792007	-111.702	-629.461	-970.786	-1091.67
25.95	-61.4319	-61.3403	-62.1948	-62.1948	-62.6526							25.95	-57.7393	-58.0444	-58.3496	-58.3496					25.95	-51.5747	-50.6897	-50.9338	-51.239							25.9	-2.67392	-0.414169	1.95457	-116.279	-630.377	-969.565	-1090.76
26	-61.4014	-60.9436	-62.2559	-62.0422	-62.3474							26	-57.7087	-57.9529	-58.2581	-58.6548					26	-51.5747	-50.9033	-51.0864	-51.4221							25.95	0.072662	0.196182	1.34422	-113.533	-635.26	-971.396	-1091.67
26.05	-61.1877	-61.3708	-62.2559	-62.3474	-62.7136							26.05	-57.6782	-58.2275	-58.1665	-58.5937					26.05	-51.4832	-50.8118	-50.9644	-51.5442							26	1.90372	1.11171	-0.792007	-110.176	-639.837	-973.227	-1097.78
26.1	-61.4624	-61.3098	-62.1948	-62.1948	-62.561							26.1	-57.5867	-58.2581	-58.1055	-58.4717					26.1	-51.5137	-50.5676	-50.9338	-51.6052							26.05	-2.06357	2.33241	-2.31789	-114.753	-641.974	-972.922	-1098.39
26.15	-61.1572	-61.2488	-62.1033	-62.2559	-62.5305							26.15	-57.4341	-58.0749	-58.2275	-58.4412					26.15	-51.6052	-50.9644	-50.6592	-51.5137							26.1	-1.75839	2.63759	-1.40236	-112.922	-642.584	-972.922	-1096.55
26.2	-61.4929	-61.0352	-61.9507	-62.2559	-62.561							26.2	-57.6172	-58.0139	-58.2581	-58.6548					26.2	-51.6663	-50.9033	-51.1475	-51.5137							26.15	2.81924	2.94276	1.95457	-108.65	-640.753	-969.565	-1101.13
26.25	-61.3708	-61.4319	-62.1643	-61.9202	-62.7441							26.25	-57.6782	-58.1055	-58.2581	-58.6853					26.25	-51.6968	-50.8423	-51.1475	-51.4526							26.2	-2.36874	1.41688	1.03905	-111.396	-643.194	-968.65	-1103.27
26.3	-61.2488	-61.3403	-62.2253	-62.3474	-62.561							26.3	-57.5561	-58.2581	-58.1055	-58.5632					26.3	-51.6052	-50.7812	-50.9949	-51.3306							26.25	-1.75839	-0.719345	-2.31789	-112.007	-646.246	-972.922	-1102.66
26.35	-61.4014	-61.2793	-62.2253	-62.1338	-62.3474							26.35	-57.5867	-58.136	-58.0749	-58.3801					26.35	-51.6357	-51.2085	-50.9033	-51.2695							26.3	2.20889	-2.85558	-2.31789	-109.565	-648.077	-975.974	-1102.05
26.4	-61.1267	-61.0657	-62.1338	-62.1643	-62.6831							26.4	-57.4036	-58.1665	-58.3496	-58.7463					26.4	-51.5137	-51.178	-50.8423	-51.3611							26.35	-2.36874	-3.7711	1.03905	-107.124	-648.382	-975.669	-1106.93
26.45	-61.4624	-61.4319	-62.2559	-62.2559	-62.6526							26.45	-57.5256	-57.8308	-58.3191	-58.6243					26.45	-51.4832	-50.8118	-51.0864	-51.6052							26.4	-1.75839	-3.46593	-1.70754	-111.396	-648.077	-975.364	-1105.4
26.5	-61.4319	-61.3098	-62.0422	-62.0117	-62.5							26.5	-57.7087	-58.0749	-58.2886	-58.5022					26.5	-51.4526	-51.1169	-51.0864	-51.5442							26.45	2.81924	-3.16075	-3.23341	-110.481	-646.246	-974.448	-1103.88
26.55	-61.1572	-61.2488	-62.0117	-62.3474	-62.3779							26.55	-57.6477	-58.136	-58.1055	-58.4412					26.55	-51.6052	-51.2085	-50.8728	-51.6052							26.5	-1.14804	-1.02452	-0.792007	-106.819	-651.739	-978.11	-1102.35
26.6	-61.3098	-61.0962	-62.1643	-62.1338	-62.7441							26.6	-57.5561	-58.0444	-58.2581	-58.7158					26.6	-51.7273	-51.1475	-50.9338	-51.5747							26.55	0.377838	-0.108994	-1.09718	-109.26	-653.265	-982.077	-1104.79
26.65	-61.1877	-61.4014	-62.3779	-62.0728	-62.6526							26.65	-57.4341	-57.9834	-58.4412	-58.7463					26.65	-51.7273	-50.9033	-50.8118	-51.6357							26.6	0.98819	-1.94005	-3.53859	-110.481	-653.875	-982.993	-1102.66
26.7	-61.4014	-61.4014	-62.2559	-62.1338	-62.3169							26.7	-57.4341	-57.8308	-58.2886	-58.5937					26.7	-51.6357	-51.2085	-50.9033	-51.5747							26.65	-1.45322	-4.68663	-0.486832	-108.65	-654.791	-979.636	-1098.08
26.75	-61.4319	-61.3708	-62.1948	-62.0422	-62.561							26.75	-57.6782	-57.9834	-58.2581	-58.3496					26.75	-51.6357	-51.2695	-51.0254	-51.4526							26.7	2.51407	-3.7711	-1.09718	-107.429	-654.181	-984.519	-1097.47
26.8	-61.0352	-61.0962	-62.2253	-62.2253	-62.5915							26.8	-57.7087	-58.0749	-58.197	-58.7769					26.8	-51.5442	-51.178	-50.9644	-51.3916							26.75	-1.45322	-1.94005	-3.23341	-111.702	-659.369	-986.655	-1097.47
26.85	-61.4624	-61.3098	-62.1643	-62.2559	-62.561							26.85	-57.5561	-58.0139	-58.136	-58.7463					26.85	-51.9104	-51.1169	-50.9338	-51.4526							26.8	-0.842865	-1.02452	0.12352	-111.396	-663.336	-984.824	-1094.11
26.9	-61.4014	-61.3708	-62.0117	-61.8286	-62.3169							26.9	-57.6172	-57.9834	-58.3801	-58.5937					26.9	-51.7883	-51.3611	-50.6592	-51.6357							26.85	2.51407	-4.07628	-5.67482	-110.481	-665.472	-985.129	-1088.01
26.95	-61.1877	-61.2793	-62.1643	-62.3474	-62.6526							26.95	-57.4036	-57.7698	-58.2275	-58.4106					26.95	-51.7883	-51.3611	-50.7812	-51.5747							26.9	-1.75839	-2.5504	-3.84376	-111.396	-665.472	-988.181	-1089.23
27	-61.3403	-61.1877	-62.2864	-62.1643	-62.6221							27	-57.4036	-57.8918	-58.3191	-58.6548					27	-51.5137	-51.239	-50.9644	-51.5442							26.95	-0.537689	0.501358	-2.31789	-115.364	-664.862	-986.045	-1087.7
27.05	-61.3098	-61.2183	-62.3779	-61.9202	-62.4695							27.05	-57.7393	-58.1055	-58.136	-58.7769					27.05	-52.0325	-51.178	-50.8728	-51.5442							27	-1.14804	-2.24522	-6.28517	-115.974	-665.777	-986.655	-1085.26
27.1	-61.1877	-61.4624	-62.2559	-62.2253	-62.4084							27.1	-57.6782	-57.9834	-58.1055	-58.6548					27.1	-51.9409	-51.3916	-50.9644	-51.3916							27.05	-2.9791	-1.63487	-1.09718	-111.702	-670.05	-987.265	-1080.99
27.15	-61.4929	-61.3098	-62.2253	-62.1033	-62.6526							27.15	-57.6782	-57.8613	-58.2581	-58.5327					27.15	-51.6968	-51.3916	-50.7202	-51.5442							27.1	0.072662	0.196182	-5.06447	-115.669	-672.796	-983.298	-1081.3
27.2	-61.2793	-61.2183	-62.1643	-61.8896	-62.6221							27.2	-57.5561	-57.8003	-58.2275	-58.5632					27.2	-51.9104	-51.1475	-50.6287	-51.5747							27.15	-5.11533	-0.108994	-2.62306	-117.805	-672.491	-985.434	-1082.52
27.25	-61.0657	-61.0657	-62.0728	-62.2559	-62.4084							27.25	-57.4951	-57.8003	-58.197	-58.8074					27.25	-51.9714	-51.2695	-50.9644	-51.5442							27.2	-5.72568	-4.07628	0.12352	-115.669	-675.848	-982.383	-1079.77
27.3	-61.3708	-61.4014	-62.1948	-62.0728	-62.439							27.3	-57.5256	-57.9529	-58.197	-58.6853					27.3	-51.7578	-51.3611	-50.9949	-51.3							27.25	-1.45322	-2.24522	-2.62306	-113.533	-673.712	-978.721	-1076.72
27.35	-61.3403	-61.4014	-62.2864	-61.8896	-62.5915							27.35	-57.6477	-57.9834	-57.8613	-58.6853					27.35	-52.0019	-51.3916	-50.8423	-51.5747							27.3	-5.72568	0.501358	1.95457	-118.11	-673.102	-979.331	-1076.72
27.4	-61.0657	-61.3708	-62.3169	-62.1338	-62.5915							27.4	-57.7698	-57.8918	-58.197	-58.4717					27.4	-52.0019	-51.1169	-50.8728	-51.3916							27.35	-5.4205	-4.07628	-2.01271	-119.331	-677.069	-971.701	-1079.77
27.45	-61.3708	-61.2183	-62.3779	-62.1033	-62.2559							27.45	-57.7393	-57.8918	-58.2581	-58.6548					27.45	-51.7273	-51.3306	-50.7507	-51.239							27.4	-1.45322	-1.94005	1.34422	-118.415	-680.426	-974.143	-1080.38
27.5	-61.3098	-61.2183	-62.1643	-61.8286	-62.4695							27.5	-57.7087	-57.6782	-58.197	-58.7463					27.5	-52.1545	-51.4526	-50.7507	-51.4221							27.45	-5.11533	-0.108994	2.56493	-117.195	-681.341	-968.955	-1078.85
27.55	-61.1267	-61.3403	-62.0422	-62.1643	-62.5305							27.55	-57.6477	-57.7087	-58.1055	-58.6548					27.55	-51.9104	-51.4526	-50.9949	-51.4832							27.5	-4.50497	-2.85558	1.03905	-122.383	-681.646	-970.176	-1080.38
27.6	-61.3708	-61.3403	-62.3779	-62.0422	-62.561							27.6	-57.4341	-58.0139	-58.0139	-58.5937					27.6	-51.6968	-51.3306	-50.9949	-51.178							27.55	-0.232513	-1.63487	6.22704	-122.688	-680.121	-970.176	-1084.96
27.65	-61.2793	-61.3708	-62.2559	-61.8591	-62.2559							27.65	-57.6172	-57.9834	-57.9224	-58.5632					27.65	-52.063	-51.3306	-50.9949	-51.4221							27.6	-3.89462	1.72206	1.34422	-120.857	-679.205	-966.513	-1086.79
27.7	-61.0657	-61.0962	-62.2253	-62.1338	-62.3779							27.7	-57.8308	-57.8918	-58.2275	-58.7769					27.7	-51.8188	-51.5747	-50.9949	-51.3916							27.65	-3.89462	-2.85558	1.34422	-118.721	-680.731	-969.87	-1085.87
27.75	-61.2183	-61.1877	-62.1338	-62.0117	-62.5							27.75	-57.8613	-57.8308	-58.136	-58.6853					27.75	-51.8799	-51.4832	-50.8118	-51.0864							27.7	-0.232513	-1.94005	5.31151	-124.519	-681.036	-965.903	-1084.65
27.8	-61.2793	-61.3708	-62.3169	-61.9507	-62.439							27.8	-57.7087	-57.7698	-58.0139	-58.6853					27.8	-51.8799	-51.4832	-50.8728	-51.3916							27.75	-1.14804	0.806534	0.428696	-125.435	-681.036	-971.396	-1088.01
27.85	-61.1877	-61.3098	-62.1643	-61.9202	-62.3169							27.85	-57.8003	-57.7698	-58.1055	-58.5632					27.85	-51.6663	-51.3306	-51.1475	-51.3306							27.8	-2.9791	-5.60216	3.48045	-122.993	-679.205	-969.87	-1090.15
27.9	-61.1267	-61.3098	-62.1948	-62.1643	-62.3169							27.9	-57.6782	-57.9224	-58.0139	-58.4412					27.9	-52.0019	-51.6052	-51.1169	-51.1169							27.85	-1.45322	-4.68663	2.8701	-119.636	-677.069	-972.922	-1090.45
27.95	-61.2793	-61.0352	-62.3169	-61.9507	-62.561							27.95	-57.5256	-57.9529	-57.8918	-58.6548					27.95	-51.8188	-51.5747	-51.0559	-51.3916							27.9	0.072662	-1.63487	0.12352	-123.298	-674.627	-973.838	-1088.93
28	-61.3098	-61.2183	-62.1643	-61.7981	-62.4695							28	-57.6477	-57.8308	-58.0749	-58.7158					28	-51.6968	-51.5747	-51.0864	-51.2085							27.95	-3.89462	-4.68663	4.39598	-125.74	-673.102	-973.838	-1088.31
28.05	-60.9131	-61.4014	-62.2559	-62.1033	-62.4084							28.05	-57.8918	-57.8613	-58.197	-58.7158					28.05	-51.9104	-51.3916	-51.0864	-51.2085							28	-2.9791	-5.29698	2.25975	-122.993	-673.407	-977.5	-1090.45
28.1	-61.3403	-61.3098	-62.3779	-62.0728	-62.3169							28.1	-57.9529	-57.7087	-58.1665	-58.5327					28.1	-51.6968	-51.6663	-50.9033	-51.3							28.05	0.377838	-3.7711	-0.181656	-119.636	-677.069	-975.669	-1089.84
28.15	-61.2183	-61.2488	-62.1338	-61.8286	-62.5305							28.15	-57.8613	-57.5561	-58.1055	-58.4106					28.15	-51.7578	-51.6968	-50.9949	-51.0559							28.1	-4.1998	-1.94005	1.6494	-122.688	-679.51	-980.552	-1088.01
28.2	-61.1572	-61.1877	-62.1948	-61.9812	-62.4695							28.2	-57.8308	-57.8308	-57.9834	-58.6853					28.2	-51.7883	-51.7578	-51.1475	-51.3916							28.15	-4.1998	-5.29698	0.428696	-125.74	-679.205	-980.246	-1084.96
28.25	-61.1267	-61.2183	-62.1948	-62.0117	-62.4695							28.25	-57.8308	-57.9529	-57.8918	-58.6853					28.25	-51.5442	-51.6357	-51.2695	-51.2695							28.2	-2.36874	-4.99181	-1.09718	-125.435	-680.426	-979.636	-1084.65
28.3	-61.3098	-61.3708	-62.0117	-62.0422	-62.2253							28.3	-57.8308	-57.8613	-57.8918	-58.5327					28.3	-51.8188	-51.4526	-51.1169	-51.2085							28.25	-2.67392	-1.3297	0.428696	-122.993	-678.9	-981.467	-1086.79
28.35	-61.2183	-61.3708	-62.2864	-61.7676	-62.4084							28.35	-57.6172	-57.8003	-58.0749	-58.4717					28.35	-51.7578	-51.6968	-51.0864	-51.4221							28.3	-4.50497	-1.94005	-1.09718	-122.688	-677.679	-978.11	-1085.57
28.4	-60.9741	-61.2793	-62.0728	-62.0422	-62.5							28.4	-57.8613	-57.8003	-58.197	-58.3801					28.4	-51.4526	-51.6663	-51.0254	-51.2085							28.35	-3.89462	-4.68663	-2.62306	-127.571	-678.9	-982.077	-1083.74
28.45	-61.2488	-61.2183	-62.2559	-62.0422	-62.4695							28.45	-58.0139	-57.7087	-58.1055	-58.5327					28.45	-51.7883	-51.6357	-50.8728	-51.2085							28.4	-0.232513	-4.07628	0.733871	-128.181	-681.341	-982.077	-1080.69
28.5	-61.2488	-61.0352	-62.2253	-61.8591	-62.2864							28.5	-58.1055	-57.5256	-58.197	-58.5937					28.5	-51.7578	-51.3916	-51.1169	-51.3611							28.45	-4.81015	-0.108994	-0.792007	-126.35	-685.309	-977.5	-1082.52
28.55	-61.0962	-61.3708	-62.0422	-62.0422	-62.2559							28.55	-57.9834	-57.7087	-57.9224	-58.5327					28.55	-51.4832	-51.6052	-51.1475	-51.178							28.5	-5.11533	-1.94005	-4.14894	-121.772	-686.529	-982.993	-1084.96
28.6	-61.1267	-61.3708	-62.3474	-62.0728	-62.5305							28.6	-57.9834	-57.8003	-57.8613	-58.5327					28.6	-51.7578	-51.7273	-51.2085	-51.1169							28.55	-3.28427	-3.16075	-2.62306	-126.045	-686.529	-981.467	-1083.74
28.65	-61.3098	-61.2793	-62.1338	-62.0117	-62.5							28.65	-58.0139	-57.8918	-57.9529	-58.4106					28.65	-51.6663	-51.7273	-51.239	-51.3							28.6	-2.67392	-1.02452	-0.486832	-126.96	-688.665	-981.772	-1083.74
28.7	-61.2488	-61.2488	-62.2253	-61.8286	-62.4695							28.7	-57.9834	-57.7698	-58.197	-58.2581					28.7	-51.6968	-51.5442	-51.2085	-51.1475							28.65	-6.94638	1.11171	-3.23341	-126.045	-688.971	-982.383	-1081.91
28.75	-61.0046	-61.1572	-62.2253	-62.0728	-62.1948							28.75	-57.8613	-57.7087	-58.1665	-58.5022					28.75	-51.6968	-51.3916	-51.0864	-51.178							28.7	-6.94638	0.806534	-1.40236	-123.298	-690.191	-978.11	-1084.96
28.8	-61.3098	-61.1877	-61.9202	-61.9507	-62.3474							28.8	-57.9224	-57.6172	-58.1055	-58.5632					28.8	-51.8494	-51.6357	-50.9949	-51.239							28.75	-3.89462	-2.5504	3.17528	-123.909	-690.191	-980.246	-1087.4
28.85	-61.3098	-61.3403	-62.2864	-61.9812	-62.6526							28.85	-58.1665	-57.5561	-58.136	-58.4717					28.85	-51.7578	-51.7578	-50.9644	-51.1475							28.8	-3.28427	-0.719345	-1.09718	-126.96	-693.548	-979.636	-1086.48
28.9	-61.2488	-61.3708	-62.1948	-61.9202	-62.3779							28.9	-58.2581	-57.6477	-58.1055	-58.3801					28.9	-51.7273	-51.6663	-51.0864	-51.0864							28.85	-6.03085	0.196182	-1.40236	-126.96	-698.126	-973.227	-1084.65
28.95	-61.1267	-61.2793	-62.0422	-62.1948	-62.3779							28.95	-58.136	-57.8003	-57.9529	-58.2581					28.95	-51.9409	-51.4221	-51.178	-51.3							28.9	-6.94638	1.41688	1.6494	-126.35	-699.652	-977.805	-1083.13
29	-61.3708	-61.2793	-62.3169	-61.9812	-62.1338							29	-58.1055	-57.8613	-57.9224	-58.2275					29	-51.8494	-51.3611	-51.2085	-51.0864							28.95	-1.75839	-3.16075	-0.486832	-123.909	-698.736	-975.669	-1085.57
29.05	-61.3403	-61.0657	-62.1643	-61.8591	-62.5							29.05	-58.0749	-57.8003	-58.0444	-58.5022					29.05	-51.5747	-51.5137	-51.1169	-50.9338							29	-2.06357	-1.63487	-1.09718	-126.045	-698.126	-971.091	-1088.62
29.1	-61.2183	-61.1572	-62.1033	-61.9507	-62.5							29.1	-58.0444	-57.7393	-58.2581	-58.3801					29.1	-52.063	-51.6968	-51.0864	-51.239							29.05	-6.33603	-1.94005	-0.486832	-127.266	-697.516	-976.279	-1088.31
29.15	-61.2488	-61.3403	-62.1643	-62.1338	-62.439							29.15	-58.2275	-57.7087	-58.2581	-58.3191					29.15	-51.8799	-51.4526	-51.0559	-51.1475							29.1	-4.50497	1.72206	-0.792007	-128.181	-696.6	-974.753	-1088.01
29.2	-61.4014	-61.2793	-62.0422	-61.9812	-62.4084							29.2	-58.1665	-57.6172	-58.2275	-58.3496					29.2	-51.7273	-51.5442	-50.9949	-50.9033							29.15	-1.45322	-1.02452	-5.06447	-127.876	-699.957	-970.786	-1087.09
29.25	-61.3708	-61.2793	-62.0728	-61.7981	-62.2559							29.25	-58.2275	-57.5256	-58.197	-58.2886					29.25	-51.8494	-51.3	-50.7812	-50.9644							29.2	-2.06357	-3.7711	-3.23341	-126.045	-700.262	-976.889	-1088.62
29.3	-61.2183	-61.3708	-62.2253	-61.9202	-62.439							29.3	-58.0444	-57.5256	-58.2275	-58.136					29.3	-52.0019	-51.4526	-50.9338	-51.1475							29.25	-5.11533	-3.7711	-0.486832	-126.96	-697.516	-978.11	-1091.06
29.35	-61.2793	-61.1877	-62.1033	-62.1643	-62.5915							29.35	-58.3191	-57.7698	-58.1055	-58.2581					29.35	-52.0019	-51.6052	-51.178	-50.9644							29.3	-4.81015	-1.63487	-4.45412	-130.317	-695.074	-975.364	-1091.67
29.4	-61.4319	-61.1572	-62.1643	-62.0422	-62.4695							29.4	-58.2581	-57.8308	-58.0139	-58.4106					29.4	-51.6357	-51.6052	-51.1169	-50.7812							29.35	-2.06357	-0.414169	-5.36964	-131.233	-698.431	-980.857	-1091.37
29.45	-61.4014	-61.2488	-62.1948	-61.7676	-62.439							29.45	-58.197	-57.8003	-58.1055	-58.3496					29.45	-51.9714	-51.6357	-51.0254	-51.0254							29.4	-2.9791	-4.68663	-2.31789	-131.843	-697.821	-982.077	-1089.54
29.5	-61.2183	-61.4624	-62.1338	-61.9507	-62.3474							29.5	-58.3496	-57.7087	-58.2581	-58.2275					29.5	-52.0019	-51.4526	-50.9644	-50.9949							29.45	-6.64121	-5.60216	-0.792007	-129.707	-695.379	-979.026	-1086.48
29.55	-61.3708	-61.2793	-62.0422	-62.1033	-62.2559							29.55	-58.2275	-57.7393	-58.2886	-58.2275					29.55	-51.9714	-51.3	-50.8728	-50.8423							29.5	-5.4205	-5.60216	-4.45412	-129.097	-694.769	-984.214	-1087.7
29.6	-61.4319	-61.3403	-62.2559	-61.9202	-62.561							29.6	-58.136	-57.4646	-58.4412	-58.0444					29.6	-51.7273	-51.6357	-51.0864	-50.8423							29.55	-2.36874	-2.24522	-3.84376	-132.454	-696.295	-984.214	-1088.93
29.65	-61.3708	-61.2488	-62.1338	-61.7676	-62.5915							29.65	-58.3496	-57.7393	-58.3191	-58.136					29.65	-52.0019	-51.6968	-51.0559	-50.9338							29.6	-2.06357	-4.99181	0.12352	-133.369	-693.548	-982.383	-1087.7
29.7	-61.2488	-61.2183	-62.0422	-61.7981	-62.5915							29.7	-58.4106	-57.8308	-58.3801	-58.136					29.7	-52.0325	-51.5747	-51.0864	-50.8118							29.65	-5.4205	-8.34874	-2.62306	-132.759	-691.107	-987.876	-1086.79
29.75	-61.2183	-61.0657	-62.3169	-62.0117	-62.3169							29.75	-58.1665	-57.7698	-58.3191	-58.2581					29.75	-51.8188	-51.6663	-50.7507	-50.6287							29.7	-6.03085	-6.51769	-3.23341	-129.707	-695.685	-988.181	-1084.35
29.8	-61.4319	-61.3098	-62.2253	-61.9507	-62.2864							29.8	-58.3801	-57.6477	-58.2886	-58.1665					29.8	-51.8799	-51.3611	-51.1169	-50.8118							29.75	-2.9791	-5.90733	-0.792007	-127.876	-690.802	-985.74	-1083.43
29.85	-61.2793	-61.3708	-61.9812	-61.7676	-62.5915							29.85	-58.4106	-57.7087	-58.1665	-58.1665					29.85	-52.063	-51.4526	-51.0864	-50.8423							29.8	-1.75839	-1.02452	1.03905	-130.012	-691.717	-990.928	-1085.87
29.9	-61.2488	-61.3403	-62.4084	-61.7371	-62.6831							29.9	-58.2275	-57.8003	-58.3801	-58.0749					29.9	-52.0325	-51.6968	-50.9949	-50.7507							29.85	-5.72568	-2.85558	-1.40236	-132.759	-693.548	-990.928	-1088.93
29.95	-61.1877	-61.3098	-62.2253	-62.0117	-62.5							29.95	-58.4717	-57.7698	-58.5022	-57.9529					29.95	-51.7883	-51.6968	-51.0559	-50.6592							29.9	-5.72568	-4.68663	-0.486832	-132.454	-689.581	-986.045	-1087.7
30	-61.4624	-61.1877	-62.0422	-61.9507	-62.439							30	-58.2886	-57.6172	-58.5022	-57.9224					30	-52.0325	-51.6968	-51.0864	-50.7812							29.95	-4.1998	-4.07628	1.34422	-130.622	-694.159	-988.791	-1086.48
30.05	-61.3098	-61.1267	-62.2559	-61.8286	-62.3169							30.05	-58.3496	-57.8613	-58.5022	-58.1055					30.05	-52.0325	-51.6968	-50.8728	-50.8423							30	-0.232513	-2.24522	2.25975	-130.012	-694.464	-988.791	-1084.04
30.1	-61.2793	-61.4014	-62.3779	-61.676	-62.3474							30.1	-58.4412	-57.7698	-58.4106	-58.0749					30.1	-52.0325	-51.6357	-51.0864	-50.6897							30.05	-2.9791	1.11171	-1.40236	-128.181	-691.717	-985.129	-1079.77
30.15	-61.1572	-61.3708	-62.2559	-61.9202	-62.5							30.15	-58.1665	-57.4951	-58.2886	-58.136					30.15	-51.7883	-51.4832	-51.0559	-50.6592							30.1	-5.11533	0.196182	0.428696	-131.233	-696.905	-983.298	-1079.46
30.2	-61.4624	-61.3403	-62.0117	-61.9507	-62.5305							30.2	-58.5327	-57.8918	-58.5937	-58.0139					30.2	-52.0019	-51.6968	-50.6592	-50.8423							30.15	-4.81015	-3.46593	2.25975	-132.454	-695.685	-983.603	-1079.16
30.25	-61.2793	-61.1267	-62.3169	-61.8591	-62.5305							30.25	-58.4106	-57.7698	-58.4717	-58.0749					30.25	-51.9714	-51.8799	-51.0864	-50.7507							30.2	-1.45322	-3.7711	0.733871	-132.148	-697.516	-981.467	-1078.85
30.3	-61.4014	-61.3708	-62.3474	-61.676	-62.5915							30.3	-58.3191	-57.5867	-58.4412	-57.8918					30.3	-51.9714	-51.7578	-51.0254	-50.6287							30.25	-0.232513	-2.85558	-1.09718	-130.928	-699.957	-980.246	-1075.5
30.35	-61.0962	-61.4319	-62.1338	-61.7065	-62.3474							30.35	-58.4717	-57.8613	-58.4412	-57.8918					30.35	-51.6968	-51.7273	-50.8118	-50.5981							30.3	-3.89462	-1.94005	-0.486832	-126.96	-695.685	-985.434	-1074.28
30.4	-61.2183	-61.2793	-62.3169	-61.9812	-62.2864							30.4	-58.3191	-57.6477	-58.5632	-57.8613					30.4	-51.9714	-51.6052	-51.0254	-50.8423							30.35	-3.89462	1.11171	1.34422	-125.129	-699.957	-985.129	-1072.14
30.45	-61.3403	-61.2183	-62.3169	-61.8286	-62.561							30.45	-58.5632	-57.8003	-58.5022	-57.9529					30.45	-51.9714	-51.5442	-50.8728	-50.6287							30.4	-2.36874	-0.719345	-1.09718	-128.486	-697.516	-983.298	-1072.14
30.5	-61.2793	-61.5234	-62.2253	-61.7981	-62.6526							30.5	-58.5327	-57.7087	-58.4412	-57.9834					30.5	-51.9104	-51.6663	-51.1169	-50.5371							30.45	0.98819	-1.94005	-1.40236	-130.317	-697.821	-989.707	-1074.28
30.55	-61.2183	-61.3708	-62.1338	-61.6455	-62.5305							30.55	-58.197	-57.5561	-58.6853	-58.0139					30.55	-51.6968	-51.7273	-51.0559	-50.5676							30.5	0.072662	-1.94005	-0.486832	-129.097	-698.736	-991.233	-1077.33
30.6	-61.1572	-61.0962	-62.3779	-61.9202	-62.5							30.6	-58.5632	-57.8918	-58.6243	-57.9834					30.6	-51.9409	-51.7883	-50.5981	-50.8118							30.55	-2.06357	-0.719345	1.03905	-130.012	-693.243	-988.486	-1079.46
30.65	-61.3403	-61.4014	-62.2559	-61.9507	-62.439							30.65	-58.5022	-57.8003	-58.4412	-58.0139					30.65	-52.0019	-51.6968	-51.0254	-50.6897							30.6	-2.67392	1.41688	-0.792007	-128.486	-697.821	-993.369	-1080.99
30.7	-61.2793	-61.2793	-62.1643	-61.9507	-62.3474							30.7	-58.3191	-57.6782	-58.6853	-57.8308					30.7	-51.8799	-51.8494	-50.9033	-50.5981							30.65	-1.14804	0.806534	-1.40236	-127.266	-696.6	-997.336	-1081.91
30.75	-61.3098	-61.3708	-62.2559	-61.8286	-62.3779							30.75	-58.5937	-57.8613	-58.4717	-57.8003					30.75	-51.7578	-51.6663	-51.0559	-50.5066							30.7	-0.232513	-2.24522	0.12352	-127.876	-691.412	-995.505	-1081.6
30.8	-61.1877	-61.4014	-62.3474	-61.676	-62.5305							30.8	-58.5022	-57.6782	-58.5632	-57.7393					30.8	-51.8188	-51.5137	-50.9949	-50.8118							30.75	-1.75839	-3.46593	3.17528	-130.622	-695.99	-995.2	-1080.99
30.85	-61.0657	-61.1572	-62.2864	-62.0117	-62.6221							30.85	-58.2886	-57.8918	-58.5937	-57.7087					30.85	-51.9104	-51.5747	-50.6897	-50.6592							30.8	-5.11533	-1.02452	1.6494	-130.622	-694.159	-999.472	-1083.74
30.9	-61.3098	-61.5234	-62.0117	-61.9507	-62.4695							30.9	-58.6548	-57.8308	-58.4717	-57.7087					30.9	-51.9104	-51.8799	-51.1169	-50.6592							30.85	-4.1998	0.196182	0.12352	-129.707	-690.191	-999.778	-1087.7
30.95	-61.3098	-61.4319	-62.3779	-61.8896	-62.5915							30.95	-58.4717	-57.6477	-58.6548	-57.9224					30.95	-51.8188	-51.8494	-50.9644	-50.354							30.9	-4.1998	1.72206	0.733871	-130.012	-694.464	-995.81	-1090.15
31	-61.3098	-61.2488	-62.2253	-61.7676	-62.4695							31	-58.3191	-57.8308	-58.6853	-57.9834					31	-51.6968	-51.7883	-50.8118	-50.7812							30.95	-2.06357	0.806534	2.8701	-126.96	-692.328	-999.778	-1090.15
31.05	-61.1572	-61.3708	-62.1948	-61.676	-62.2864							31.05	-58.5937	-57.7698	-58.3496	-58.0139					31.05	-52.0019	-51.8494	-51.0254	-50.6897							31	-1.45322	-1.3297	2.56493	-125.129	-689.276	-1000.39	-1089.23
31.1	-61.0352	-61.0962	-62.1033	-61.9507	-62.3169							31.1	-58.6548	-57.8003	-58.7158	-57.7393					31.1	-51.7883	-51.7578	-50.9033	-50.6287							31.05	-5.4205	-3.46593	-1.40236	-127.876	-692.633	-998.252	-1087.7
31.15	-61.2793	-61.554	-62.3779	-62.0117	-62.5915							31.15	-58.3191	-57.7393	-58.5022	-57.8613					31.15	-51.7883	-51.6663	-50.8118	-50.5371							31.1	-4.50497	-1.94005	-0.181656	-130.012	-690.191	-1000.39	-1086.18
31.2	-61.2488	-61.3098	-62.3474	-61.9507	-62.5305							31.2	-58.6548	-57.6782	-58.5937	-57.8003					31.2	-51.6357	-51.6052	-51.1475	-50.6287							31.15	-4.50497	-1.94005	1.03905	-132.759	-686.224	-1001.91	-1081.6
31.25	-61.4014	-61.4014	-62.1338	-61.7981	-62.5							31.25	-58.6548	-57.7698	-58.6548	-57.6782					31.25	-51.8494	-51.7578	-50.9033	-50.6592							31.2	-1.14804	-0.108994	2.8701	-132.454	-689.276	-1000.69	-1080.99
31.3	-61.0657	-61.4319	-62.1033	-61.676	-62.5							31.3	-58.5937	-57.7393	-58.5327	-57.6782					31.3	-51.8799	-51.9104	-50.8423	-50.6592							31.25	-0.537689	1.11171	-1.70754	-131.843	-685.919	-995.81	-1081.91
31.35	-60.9741	-61.1572	-62.3779	-61.9812	-62.5							31.35	-58.4412	-57.5867	-58.7158	-57.9224					31.35	-51.9714	-52.0325	-51.0254	-50.5066							31.3	-2.06357	-0.719345	-2.01271	-130.928	-681.646	-998.557	-1081.6
31.4	-61.2793	-61.4929	-62.3474	-62.1033	-62.3474							31.4	-58.7463	-57.8613	-58.6853	-57.9529					31.4	-51.7883	-51.9104	-50.9033	-50.415							31.35	-2.36874	-4.07628	-0.486832	-129.097	-686.224	-997.947	-1080.38
31.45	-61.3098	-61.2793	-62.1033	-61.9507	-62.2864							31.45	-58.6548	-57.8003	-58.3801	-57.8918					31.45	-51.5747	-51.9104	-50.9033	-50.6897							31.4	-2.06357	-4.07628	1.34422	-126.655	-687.14	-994.284	-1077.63
31.5	-61.2488	-61.4624	-62.0728	-61.9202	-62.439							31.5	-58.4717	-57.5867	-58.8074	-57.7393					31.5	-51.9714	-51.8799	-51.0254	-50.7202							31.45	0.98819	-3.7711	0.12352	-129.097	-684.698	-990.012	-1077.63
31.55	-61.1267	-61.4624	-62.3474	-61.7371	-62.5							31.55	-58.7463	-57.7698	-58.6548	-57.5867					31.55	-51.9409	-51.8188	-51.0864	-50.5981							31.5	3.12442	-1.3297	-2.31789	-130.317	-688.971	-993.369	-1075.19
31.6	-60.9436	-61.1877	-62.3474	-61.9812	-62.6221							31.6	-58.6243	-57.7698	-58.4717	-57.9834					31.6	-51.9104	-51.7578	-50.8118	-50.4761							31.55	0.377838	-1.3297	-1.40236	-129.402	-693.548	-991.538	-1073.67
31.65	-61.2793	-61.5234	-62.1643	-62.0422	-62.6221							31.65	-58.6243	-57.6172	-58.7769	-57.8918					31.65	-51.6052	-51.6968	-51.178	-50.5371							31.6	-2.06357	-1.02452	0.12352	-129.097	-692.938	-986.045	-1072.14
31.7	-61.3403	-61.3403	-62.1033	-61.9812	-62.5915							31.7	-58.7463	-57.6172	-58.6853	-57.7393					31.7	-51.7273	-51.9409	-50.9949	-50.7812							31.65	-2.36874	-4.38145	2.56493	-128.181	-693.243	-983.603	-1073.36
31.75	-61.2183	-61.2488	-62.3779	-62.0728	-62.4695							31.75	-58.7158	-57.7393	-58.3801	-57.6782					31.75	-52.0019	-51.9409	-50.7507	-50.6897							31.7	-1.75839	-6.21251	1.03905	-127.266	-696.6	-984.519	-1075.8
31.8	-61.2488	-61.4929	-62.2864	-61.9202	-62.439							31.8	-58.6548	-57.7087	-58.7463	-57.9834					31.8	-51.8494	-52.0935	-51.1169	-50.6592							31.75	-2.67392	-7.43321	-0.486832	-124.519	-696.6	-982.077	-1076.72
31.85	-61.1877	-61.3098	-62.1643	-61.7676	-62.4084							31.85	-58.5022	-57.5867	-58.7463	-57.9224					31.85	-51.7883	-51.9409	-51.0559	-50.5066							31.8	-0.232513	-6.21251	-0.486832	-121.467	-692.938	-976.279	-1078.24
31.9	-61.0046	-61.4624	-62.1033	-62.0422	-62.561							31.9	-58.8074	-57.8003	-58.4412	-57.6477					31.9	-51.5747	-52.0935	-50.9644	-50.5981							31.85	-2.06357	-4.68663	1.95457	-121.772	-697.21	-975.669	-1077.94
31.95	-61.1877	-61.4014	-62.4695	-62.0728	-62.6221							31.95	-58.6853	-57.7393	-58.6853	-58.0444					31.95	-51.7883	-51.9409	-51.0864	-50.6897							31.9	-4.1998	-4.99181	5.31151	-123.909	-695.99	-978.11	-1077.63
32	-61.3098	-61.2488	-62.3779	-62.0728	-62.5305							32	-58.6548	-57.5561	-58.7158	-57.9224					32	-51.8494	-51.8494	-51.178	-50.8118							31.95	-5.72568	-4.38145	1.6494	-122.993	-692.938	-975.058	-1076.11
32.05	-61.2793	-61.4319	-62.3169	-61.8591	-62.439							32.05	-58.6243	-57.8003	-58.4717	-57.6782					32.05	-51.7883	-51.8188	-50.9949	-50.7202							32	-4.50497	-5.29698	1.6494	-122.078	-693.853	-972.007	-1074.58
32.1	-61.1572	-61.4319	-61.9812	-61.8591	-62.3779							32.1	-58.8989	-57.6782	-58.6243	-57.9529					32.1	-51.7273	-52.124	-50.8728	-50.5676							32.05	-2.36874	-6.82286	1.95457	-119.026	-697.21	-972.922	-1072.75
32.15	-61.1267	-61.1267	-62.3779	-61.8286	-62.6526							32.15	-58.6853	-57.5867	-58.5937	-57.8613					32.15	-51.5442	-52.124	-51.2085	-50.5981							32.1	-0.232513	-8.34874	5.00633	-116.89	-695.99	-975.974	-1070.61
32.2	-61.0962	-61.4319	-62.3474	-62.0117	-62.5915							32.2	-58.6243	-57.6782	-58.5937	-57.7698					32.2	-51.6663	-51.9104	-51.239	-50.8728							32.15	-2.06357	-7.43321	6.83739	-118.415	-692.633	-974.143	-1067.87
32.25	-61.2488	-61.4929	-62.3474	-62.0117	-62.439							32.25	-58.7769	-57.7393	-58.6243	-57.9834					32.25	-51.8799	-51.7273	-50.9644	-50.8118							32.2	-4.1998	-7.12804	3.17528	-121.162	-700.262	-969.565	-1069.39
32.3	-61.4014	-61.0962	-62.0728	-61.9507	-62.4695							32.3	-58.8684	-57.5561	-58.6548	-57.8003					32.3	-51.8494	-51.9409	-51.1169	-50.6897							32.25	-3.28427	-5.29698	1.6494	-119.636	-700.567	-972.312	-1070
32.35	-61.2488	-61.4929	-62.3779	-62.0422	-62.6221							32.35	-58.7158	-57.4646	-58.6243	-57.8003					32.35	-51.7273	-52.124	-51.2695	-50.6592							32.3	-2.67392	-3.7711	3.17528	-117.805	-697.821	-974.753	-1070.92
32.4	-61.3403	-61.4014	-62.439	-61.9202	-62.5							32.4	-58.5022	-57.7698	-58.4412	-57.8918					32.4	-51.5747	-51.8799	-51.178	-50.5676							32.35	-2.36874	-3.16075	5.00633	-117.195	-697.21	-975.058	-1070.61
32.45	-61.1267	-61.1572	-62.4084	-61.676	-62.2253							32.45	-58.8074	-57.5867	-58.7158	-57.8003					32.45	-51.5137	-51.7273	-50.9338	-50.8728							32.4	0.072662	-4.07628	5.92186	-121.772	-702.093	-971.091	-1069.7
32.5	-61.0962	-61.3403	-62.2864	-61.7981	-62.6831							32.5	-58.8074	-57.4646	-58.5632	-58.0139					32.5	-51.7883	-52.0019	-51.3	-50.8118							32.45	2.81924	-5.90733	3.17528	-120.552	-698.736	-972.617	-1065.73
32.55	-61.2183	-61.4624	-62.1948	-62.0422	-62.561							32.55	-58.6853	-57.5561	-58.4717	-57.9224					32.55	-51.7883	-52.0019	-51.3	-50.8728							32.5	0.683014	-6.21251	0.733871	-118.11	-692.633	-975.669	-1065.12
32.6	-61.4624	-61.2488	-62.5	-62.0422	-62.3474							32.6	-58.5632	-57.6782	-58.5632	-57.6782					32.6	-51.7883	-51.7578	-51.239	-50.8118							32.55	-0.842865	-5.90733	1.34422	-123.298	-692.633	-973.838	-1066.04
32.65	-61.2793	-61.4014	-62.4695	-61.8896	-62.6221							32.65	-58.96	-57.5256	-58.7463	-58.0444					32.65	-51.6968	-51.9409	-51.178	-50.5676							32.6	-1.45322	-5.29698	3.17528	-122.078	-692.328	-969.87	-1068.17
32.7	-61.3708	-61.3708	-62.4084	-61.8896	-62.5							32.7	-58.8074	-57.1594	-58.5327	-57.8918					32.7	-51.5747	-51.9409	-51.3916	-50.7202							32.65	-1.14804	-5.90733	5.61668	-117.805	-689.276	-967.734	-1066.95
32.75	-61.2183	-61.3708	-62.2559	-61.8286	-62.6221							32.75	-58.6548	-57.5867	-58.2886	-57.8308					32.75	-51.6052	-51.6052	-51.3	-50.8728							32.7	0.072662	-4.99181	5.92186	-122.993	-683.172	-969.26	-1065.12
32.8	-61.2488	-61.2183	-62.3474	-61.6455	-62.5915							32.8	-58.5327	-57.5867	-58.6243	-57.9834					32.8	-51.9104	-51.9104	-51.0254	-50.8118							32.75	1.59854	-3.7711	3.48045	-120.552	-684.088	-967.124	-1063.29
32.85	-61.1572	-61.4624	-62.561	-61.7981	-62.3169							32.85	-58.96	-57.4341	-58.5632	-57.9224					32.85	-51.8494	-51.7883	-51.2695	-50.8423							32.8	1.90372	-3.7711	4.70116	-116.584	-686.224	-965.293	-1066.34
32.9	-61.3098	-61.3403	-62.5	-61.9507	-62.6831							32.9	-58.7769	-57.251	-58.4106	-57.8613					32.9	-51.7578	-51.5747	-51.2695	-50.6897							32.85	1.90372	-1.94005	3.78563	-120.247	-685.003	-961.326	-1064.21
32.95	-61.4014	-61.1877	-62.5	-61.9812	-62.6221							32.95	-58.7158	-57.6172	-58.3496	-57.9224					32.95	-51.6968	-51.8799	-51.239	-50.5371							32.9	-0.842865	-4.07628	5.61668	-116.584	-683.477	-964.377	-1058.71
33	-61.4014	-61.4624	-62.3474	-61.8591	-62.3779							33	-58.5937	-57.5867	-58.5937	-57.8918					33	-51.5747	-51.6968	-51.0254	-50.7507							32.95	-2.06357	-5.29698	8.36327	-118.11	-688.971	-965.598	-1060.24
33.05	-61.3403	-61.4624	-62.4695	-61.8591	-62.5305							33.05	-58.8074	-57.373	-58.5022	-57.9224					33.05	-51.6968	-51.8494	-51.3611	-50.8728							33	-3.28427	-5.60216	7.14256	-118.721	-691.107	-964.377	-1058.1
33.1	-61.2488	-61.0352	-62.6526	-61.7371	-62.3474							33.1	-58.8989	-57.3425	-58.3191	-57.9529					33.1	-51.8188	-51.8799	-51.239	-50.8423							33.05	-2.06357	-4.99181	3.17528	-113.838	-692.022	-961.326	-1053.22
33.15	-61.3098	-61.4624	-62.5915	-61.6455	-62.7441							33.15	-58.7463	-57.6172	-58.2275	-57.8918					33.15	-51.8188	-51.4832	-51.2085	-50.7507							33.1	-0.842865	-3.46593	3.48045	-119.331	-690.802	-960.105	-1052.91
33.2	-61.0962	-61.4014	-62.5915	-61.6455	-62.561							33.2	-58.5022	-57.5561	-58.5632	-57.9529					33.2	-51.7578	-51.8494	-50.9949	-50.6897							33.15	-0.842865	-4.07628	3.48045	-116.584	-695.685	-961.936	-1053.52
33.25	-61.2793	-61.2488	-62.3779	-61.9812	-62.3169							33.25	-58.8074	-57.373	-58.4717	-57.9834					33.25	-51.7578	-51.8188	-51.3	-50.5371							33.2	0.377838	-4.07628	4.70116	-115.364	-697.21	-959.494	-1050.17
33.3	-61.4014	-61.3098	-62.5	-61.9202	-62.6831							33.3	-58.8684	-57.4036	-58.2886	-57.9224					33.3	-51.5442	-51.6357	-51.2695	-50.7507							33.25	0.072662	-3.46593	5.61668	-117.195	-695.685	-954.612	-1052.91
33.35	-61.3098	-61.554	-62.6831	-61.8591	-62.4695							33.35	-58.7463	-57.6172	-58.2886	-57.7087					33.35	-51.5442	-51.7273	-51.1475	-50.8118							33.3	-0.842865	-1.3297	4.70116	-113.533	-694.464	-950.95	-1055.97
33.4	-61.3708	-61.3708	-62.7136	-61.8591	-62.5							33.4	-58.6548	-57.5867	-58.5022	-58.1665					33.4	-51.7578	-51.6357	-51.0254	-50.8728							33.35	-2.36874	-0.414169	2.8701	-115.669	-696.905	-952.475	-1054.75
33.45	-61.3708	-61.1267	-62.561	-61.8591	-62.4695							33.45	-58.7769	-57.2815	-58.4717	-57.9834					33.45	-51.8494	-51.8188	-51.2695	-50.7812							33.4	-3.28427	-0.719345	1.95457	-117.195	-698.126	-951.865	-1059.32
33.5	-61.0352	-61.4624	-62.3169	-61.7371	-62.3474							33.5	-58.9294	-57.3425	-58.1665	-57.7393					33.5	-51.7273	-51.7578	-51.2695	-50.8118							33.45	-2.67392	-2.24522	3.17528	-112.922	-696.905	-950.034	-1061.46
33.55	-61.3098	-61.4624	-62.439	-61.615	-62.6526							33.55	-58.7158	-57.5867	-58.2886	-57.9224					33.55	-51.7273	-51.4526	-51.239	-50.6897							33.5	-1.14804	-1.02452	3.48045	-117.805	-691.717	-948.203	-1057.8
33.6	-61.4624	-61.2793	-62.6831	-61.8286	-62.561							33.6	-58.6243	-57.4951	-58.4717	-58.0749					33.6	-51.6663	-51.8188	-51.0254	-50.6592							33.55	-0.842865	-2.5504	5.61668	-114.448	-692.328	-948.203	-1062.99
33.65	-61.4319	-61.3098	-62.561	-61.9202	-62.2253							33.65	-58.6853	-57.3425	-58.4717	-57.9224					33.65	-51.5137	-51.7883	-51.2085	-50.9338							33.6	-1.14804	-4.68663	6.22704	-114.143	-691.717	-951.865	-1062.07
33.7	-61.1572	-61.4014	-62.6221	-61.7981	-62.5915							33.7	-58.8684	-57.312	-58.136	-57.7393					33.7	-51.5747	-51.5137	-51.3306	-51.1169							33.65	0.072662	-4.68663	4.0908	-115.364	-689.276	-952.781	-1056.88
33.75	-61.3098	-61.4014	-62.4695	-61.676	-62.6526							33.75	-58.7158	-57.5867	-58.2275	-58.0444					33.75	-51.7273	-51.8188	-51.2695	-50.9644							33.7	-0.537689	-3.7711	2.56493	-112.312	-682.867	-952.781	-1060.54
33.8	-61.4319	-61.2488	-62.439	-61.554	-62.2253							33.8	-58.7463	-57.5561	-58.4106	-58.1055					33.8	-51.7883	-51.7578	-51.1475	-51.0254							33.75	-2.36874	-3.16075	1.34422	-113.227	-681.341	-951.56	-1058.1
33.85	-61.4014	-61.3708	-62.4695	-61.8896	-62.6221							33.85	-58.5327	-57.2815	-58.3496	-57.8003					33.85	-51.7578	-51.4526	-51.239	-51.0254							33.8	-4.50497	-3.16075	2.25975	-113.533	-681.952	-950.644	-1056.27
33.9	-61.0352	-61.3403	-62.6221	-61.8286	-62.5305							33.9	-58.7158	-57.2815	-58.1665	-57.9224					33.9	-51.7578	-51.7578	-51.3611	-50.8118							33.85	-5.4205	-2.5504	3.78563	-110.481	-681.036	-953.696	-1060.24
33.95	-61.5234	-61.3098	-62.6221	-61.6455	-62.439							33.95	-58.7769	-57.5561	-58.1055	-58.0444					33.95	-51.6052	-51.7578	-51.3306	-50.8728							33.9	-4.50497	-2.5504	4.39598	-111.396	-677.984	-954.917	-1057.19
34	-61.4014	-61.3098	-62.5915	-61.7676	-62.6221							34	-58.6548	-57.4951	-58.3496	-58.0444					34	-51.5137	-51.4526	-51.3306	-50.9949							33.95	-2.9791	-1.3297	6.53221	-115.059	-675.238	-955.222	-1056.88
34.05	-61.1877	-61.4319	-62.4695	-61.8591	-62.5305							34.05	-58.6548	-57.373	-58.3191	-57.7393					34.05	-51.5137	-51.6663	-51.239	-51.2695							34	-0.537689	-0.108994	4.70116	-111.702	-678.9	-953.086	-1058.1
34.1	-61.4319	-61.4624	-62.3779	-61.7676	-62.4695							34.1	-58.4717	-57.0679	-58.1055	-58.0444					34.1	-51.6663	-51.6663	-51.4221	-51.1475							34.05	-2.67392	-0.108994	4.39598	-111.702	-679.815	-951.255	-1055.05
34.15	-61.2793	-61.2183	-62.5915	-61.5845	-62.4695							34.15	-58.6853	-57.4036	-57.8918	-58.0139					34.15	-51.7883	-51.4221	-51.3916	-51.0864							34.1	-5.72568	-0.108994	2.25975	-114.143	-680.121	-955.222	-1054.44
34.2	-61.2488	-61.4319	-62.6831	-61.9202	-62.6526							34.2	-58.7158	-57.5561	-58.2581	-57.9834					34.2	-51.7578	-51.6968	-51.3306	-51.2085							34.15	-4.1998	-0.108994	2.8701	-111.702	-677.679	-955.832	-1058.41
34.25	-61.4624	-61.4014	-62.5915	-61.7371	-62.4695							34.25	-58.6853	-57.4036	-58.2275	-57.8613					34.25	-51.7273	-51.6052	-51.1169	-51.1169							34.2	-2.36874	-0.719345	2.56493	-111.396	-678.9	-955.527	-1057.19
34.3	-61.1877	-61.3098	-62.5915	-61.7065	-62.3474							34.3	-58.5937	-57.2205	-58.1665	-58.197					34.3	-51.6663	-51.5747	-51.2695	-51.0254							34.25	-1.45322	-2.24522	5.31151	-113.227	-681.341	-954.306	-1055.05
34.35	-61.4319	-61.1572	-62.561	-61.7371	-62.6221							34.35	-58.3801	-57.2815	-57.9834	-58.0749					34.35	-51.5747	-51.4832	-51.4526	-50.9949							34.3	-3.89462	-3.46593	4.39598	-112.922	-680.731	-951.56	-1061.15
34.4	-61.3403	-61.4929	-62.439	-61.7065	-62.5915							34.4	-58.6548	-57.6172	-58.1055	-58.0749					34.4	-51.3916	-51.6663	-51.4221	-51.239							34.35	-3.89462	-4.07628	1.03905	-109.871	-678.289	-952.17	-1061.46
34.45	-61.1877	-61.4014	-62.6221	-61.8896	-62.3169							34.45	-58.7158	-57.3425	-58.2886	-58.0139					34.45	-51.4221	-51.4526	-51.3	-51.3611							34.4	0.377838	-4.38145	-0.181656	-114.143	-675.238	-955.527	-1058.41
34.5	-61.4624	-61.2793	-62.6526	-61.8286	-62.5915							34.5	-58.6548	-57.3425	-58.136	-58.2275					34.5	-51.5747	-51.2085	-51.178	-51.3916							34.45	-2.67392	-4.99181	0.12352	-113.533	-675.848	-954.917	-1061.76
34.55	-61.0962	-61.1877	-62.5915	-61.5845	-62.5305							34.55	-58.5022	-57.1899	-58.0749	-58.1665					34.55	-51.6357	-51.6052	-51.4526	-51.239							34.5	-3.89462	-5.29698	1.95457	-109.565	-676.764	-954.917	-1062.07
34.6	-61.4014	-61.4014	-62.6221	-61.9812	-62.561							34.6	-58.3801	-57.5256	-57.9529	-58.2275					34.6	-51.7273	-51.5137	-51.4526	-51.239							34.55	-0.232513	-4.07628	1.34422	-112.922	-675.238	-953.391	-1060.24
34.65	-61.3708	-61.3708	-62.439	-61.6455	-62.3779							34.65	-58.7463	-57.4951	-58.2275	-58.0749					34.65	-51.7273	-51.3306	-51.4221	-51.178							34.6	-1.14804	-3.7711	-0.792007	-113.838	-671.881	-952.475	-1059.32
34.7	-61.1877	-61.2488	-62.3169	-61.7676	-62.561							34.7	-58.7158	-57.4341	-58.136	-58.3191					34.7	-51.6663	-51.3	-51.178	-51.178							34.65	-4.1998	-3.46593	0.12352	-112.007	-668.524	-955.222	-1063.29
34.75	-61.3403	-61.0962	-62.4084	-61.7981	-62.6526							34.75	-58.6853	-57.4036	-58.0749	-58.2886					34.75	-51.6357	-51.5747	-51.2695	-51.0254							34.7	-0.537689	-2.85558	3.78563	-109.26	-671.881	-954.612	-1061.46
34.8	-61.1572	-61.4319	-62.6526	-61.6455	-62.3169							34.8	-58.5632	-57.3425	-58.0444	-58.2886					34.8	-51.5137	-51.5442	-51.5137	-51.0559							34.75	-2.06357	-1.3297	-0.181656	-112.617	-672.491	-952.17	-1058.1
34.85	-61.4319	-61.4319	-62.7747	-61.9507	-62.6221							34.85	-58.4717	-57.5256	-57.9834	-58.197					34.85	-51.4832	-51.1475	-51.3916	-51.2695							34.8	-2.36874	-2.85558	0.12352	-110.786	-671.27	-949.424	-1059.93
34.9	-61.3708	-61.2793	-62.5915	-61.676	-62.561							34.9	-58.6243	-57.4341	-58.197	-58.5632					34.9	-51.4526	-51.5137	-51.3306	-51.4526							34.85	2.20889	-4.68663	3.48045	-105.293	-670.05	-946.982	-1062.07
34.95	-61.1267	-61.0962	-62.5915	-61.7065	-62.561							34.95	-58.6853	-57.4951	-58.0749	-58.3801					34.95	-51.6968	-51.4526	-51.1169	-51.3306							34.9	-2.67392	-4.38145	1.03905	-107.734	-666.998	-947.898	-1059.63
35	-61.3098	-61.3098	-62.5915	-61.7981	-62.4084							35	-58.5327	-57.4341	-58.1055	-58.3496					35	-51.6663	-51.3611	-51.239	-51.239							34.95	-1.75839	-3.16075	0.12352	-106.819	-668.524	-946.982	-1056.88
35.05	-61.1877	-61.4014	-62.5	-61.5845	-62.7136							35.05	-58.6853	-57.2815	-57.9834	-58.197					35.05	-51.7273	-51.178	-51.3916	-51.3							35	0.683014	0.806534	4.0908	-104.683	-670.05	-942.71	-1061.46
35.1	-61.4014	-61.3098	-62.4695	-61.8896	-62.6221							35.1	-58.5632	-57.5561	-57.9834	-58.5632					35.1	-51.6663	-51.4221	-51.4526	-51.239							35.05	-2.36874	-1.63487	0.12352	-101.02	-669.134	-944.846	-1060.54
35.15	-61.3403	-61.1267	-62.5915	-61.8286	-62.439							35.15	-58.3801	-57.6172	-58.2581	-58.5022					35.15	-51.3306	-51.4221	-51.3	-51.178							35.1	0.072662	-4.07628	0.12352	-104.072	-667.914	-946.067	-1058.71
35.2	-61.0046	-61.3403	-62.7441	-61.6455	-62.5305							35.2	-58.6853	-57.5561	-58.197	-58.5632					35.2	-51.7273	-51.239	-51.1169	-51.0254							35.15	-2.67392	-2.85558	2.8701	-102.546	-666.082	-943.625	-1055.97
35.25	-61.3708	-61.4014	-62.6526	-61.9507	-62.6831							35.25	-58.7769	-57.4036	-58.1665	-58.3191					35.25	-51.7578	-51.178	-51.2695	-51.2085							35.2	-3.58945	0.196182	-1.09718	-99.4946	-664.862	-944.846	-1060.54
35.3	-61.2793	-61.4014	-62.6526	-61.7371	-62.5915							35.3	-58.5937	-57.373	-58.0139	-58.6548					35.3	-51.7578	-51.3611	-51.4221	-51.3611							35.25	1.29337	-1.94005	2.56493	-100.41	-667.608	-947.898	-1060.85
35.35	-61.0962	-61.1877	-62.5915	-61.615	-62.4695							35.35	-58.5937	-57.6172	-58.0139	-58.6548					35.35	-51.4221	-51.3916	-51.3916	-51.3306							35.3	-4.50497	-3.7711	0.733871	-101.936	-667.914	-945.762	-1059.63
35.4	-61.3098	-61.2183	-62.5305	-61.9202	-62.6221							35.4	-58.4106	-57.6782	-58.2581	-58.7158					35.4	-51.6968	-51.178	-51.3	-51.2695							35.35	-2.36874	-1.3297	-1.09718	-101.326	-666.388	-948.813	-1059.93
35.45	-61.3403	-61.4929	-62.3779	-61.7676	-62.6831							35.45	-58.5022	-57.4951	-58.2886	-58.5327					35.45	-51.6357	-51.3306	-51.3306	-51.0864							35.4	-1.75839	0.196182	3.17528	-97.3583	-663.946	-949.424	-1066.34
35.5	-61.0352	-61.3708	-62.5915	-61.5845	-62.6831							35.5	-58.6243	-57.4646	-58.197	-58.5327					35.5	-51.3916	-51.4221	-51.178	-51.3611							35.45	-4.1998	-3.7711	0.12352	-101.936	-660.894	-946.067	-1065.43
35.55	-61.3403	-61.2793	-62.6831	-61.8286	-62.439							35.55	-58.6243	-57.3425	-58.136	-58.7158					35.55	-51.6052	-51.3916	-51.4221	-51.4221							35.5	-2.06357	-4.38145	2.56493	-101.631	-663.031	-951.865	-1062.68
35.6	-61.2488	-61.1572	-62.7136	-61.7676	-62.8357							35.6	-58.5937	-57.6172	-58.0749	-58.7158					35.6	-51.6052	-51.178	-51.4221	-51.3306							35.55	-2.9791	0.501358	1.03905	-100.715	-664.557	-946.677	-1059.93
35.65	-61.0352	-61.4319	-62.6221	-61.7371	-62.6831							35.65	-58.6243	-57.6782	-58.3496	-58.6548					35.65	-51.3611	-51.3306	-51.5747	-51.0864							35.6	-4.1998	-3.16075	0.12352	-98.8842	-663.031	-947.898	-1061.76
35.7	-61.3403	-61.4929	-62.5915	-61.8286	-62.5915							35.7	-58.5022	-57.4951	-58.2886	-58.5327					35.7	-51.6052	-51.4832	-51.4526	-51.4221							35.65	-0.842865	-2.85558	4.0908	-103.767	-661.2	-947.898	-1058.41
35.75	-61.3098	-61.3708	-62.3474	-61.7676	-62.5305							35.75	-58.4412	-57.6477	-58.2275	-58.6853					35.75	-51.5137	-51.3306	-51.3	-51.4526							35.7	-3.58945	1.11171	0.428696	-104.683	-657.843	-945.151	-1052.3
35.8	-61.0352	-61.3403	-62.6221	-61.615	-62.8357							35.8	-58.6243	-57.5256	-58.2886	-58.8684					35.8	-51.1475	-51.3	-51.3306	-51.239							35.75	-4.50497	-3.46593	3.48045	-103.462	-654.791	-947.287	-1047.42
35.85	-61.3403	-61.2793	-62.7441	-61.9812	-62.7136							35.85	-58.7769	-57.4036	-58.1055	-58.8074					35.85	-51.5442	-51.239	-51.6052	-51.4526							35.8	0.377838	-2.24522	-0.181656	-102.241	-656.317	-943.015	-1047.73
35.9	-61.2183	-61.4929	-62.6831	-61.7676	-62.6831							35.9	-58.6243	-57.6782	-58.0749	-58.5937					35.9	-51.4526	-51.3916	-51.5442	-51.5137							35.85	-3.58945	2.02724	1.03905	-106.208	-656.927	-948.203	-1044.98
35.95	-61.0962	-61.4014	-62.4695	-61.5234	-62.5915							35.95	-58.5937	-57.7393	-58.3191	-58.5327					35.95	-51.239	-51.3611	-51.5442	-51.2695							35.9	-4.1998	-3.16075	3.48045	-107.124	-654.486	-943.015	-1041.32
36	-61.2488	-61.4929	-62.6221	-61.8286	-62.8357							36	-58.5022	-57.6477	-58.3191	-58.96					36	-51.4526	-51.178	-51.4832	-51.5137							35.95	-2.67392	-3.46593	-0.792007	-104.683	-653.875	-945.456	-1037.96
36.05	-61.2793	-61.1877	-62.6831	-61.7981	-62.7747							36.05	-58.4717	-57.6782	-58.2581	-58.7769					36.05	-51.3	-51.2085	-51.3306	-51.4526							36	-2.06357	1.11171	1.6494	-101.326	-651.129	-942.099	-1041.01
36.1	-61.1877	-61.4319	-62.5915	-61.554	-62.7136							36.1	-58.4106	-57.4646	-58.1055	-58.8074					36.1	-51.4221	-51.3916	-51.4526	-51.239							36.05	-4.1998	-3.16075	0.428696	-106.208	-648.687	-940.574	-1042.84
36.15	-61.1572	-61.615	-62.2864	-61.676	-62.5305							36.15	-58.6853	-57.4646	-58.0444	-58.6548					36.15	-51.4221	-51.3	-51.5747	-51.6663							36.1	-2.9791	-4.07628	-0.792007	-104.683	-650.824	-938.742	-1044.37
36.2	-61.3403	-61.4929	-62.7747	-61.8286	-62.8662							36.2	-58.5632	-57.7393	-58.2275	-58.7769					36.2	-51.1169	-51.239	-51.6663	-51.5137							36.15	-1.75839	-0.414169	3.48045	-101.326	-654.486	-931.723	-1042.84
36.25	-61.2488	-61.4319	-62.6221	-61.6455	-62.7747							36.25	-58.6243	-57.7087	-58.4106	-58.9294					36.25	-51.4526	-51.178	-51.6052	-51.3							36.2	-4.81015	-2.85558	-0.486832	-98.2739	-654.181	-934.47	-1045.9
36.3	-61.0962	-61.2488	-62.3474	-61.5234	-62.7136							36.3	-58.4717	-57.6172	-58.2581	-58.8684					36.3	-51.3306	-51.3306	-51.6357	-51.6968							36.25	-3.28427	-3.7711	-0.486832	-102.546	-652.35	-928.061	-1052.3
36.35	-61.4014	-61.4624	-62.6831	-61.7981	-62.5							36.35	-58.5937	-57.6782	-58.2581	-58.8379					36.35	-51.3306	-51.2085	-51.4526	-51.5442							36.3	0.98819	-1.3297	4.39598	-101.936	-652.044	-930.808	-1053.83
36.4	-61.3708	-61.6455	-62.6221	-61.7371	-62.8357							36.4	-58.3191	-57.5867	-58.2886	-58.7463					36.4	-51.3611	-51.178	-51.3	-51.5137							36.35	-4.1998	-0.719345	0.428696	-101.02	-650.518	-925.62	-1054.14
36.45	-61.0962	-61.5234	-62.4695	-61.4014	-62.7747							36.45	-58.4106	-57.5256	-58.0749	-58.6853					36.45	-51.178	-50.9338	-51.5747	-51.6052							36.4	-3.58945	-4.99181	0.733871	-97.3583	-650.824	-925.315	-1052.3
36.5	-61.4319	-61.4319	-62.6526	-61.8286	-62.7747							36.5	-58.5327	-57.6477	-58.1055	-58.96					36.5	-51.5747	-51.1475	-51.7578	-51.3611							36.45	-0.232513	-3.7711	4.70116	-100.105	-651.739	-925.925	-1055.97
36.55	-61.2793	-61.2488	-62.439	-61.7065	-62.6526							36.55	-58.6243	-57.8308	-58.3191	-58.8074					36.55	-51.4526	-51.2085	-51.6357	-51.8188							36.5	-1.14804	0.501358	1.03905	-101.631	-654.181	-921.958	-1058.71
36.6	-61.1877	-61.5234	-62.6221	-61.5845	-62.7136							36.6	-58.5327	-57.7393	-58.3801	-58.8989					36.6	-51.1475	-51.1475	-51.5137	-51.6052							36.55	-3.89462	-2.5504	1.6494	-98.8842	-654.791	-927.756	-1058.1
36.65	-61.1877	-61.615	-62.7136	-61.5234	-62.8357							36.65	-58.6243	-57.7087	-58.3801	-58.7769					36.65	-51.4221	-51.0559	-51.5747	-51.4221							36.6	-1.14804	-4.38145	5.00633	-94.6118	-656.622	-925.01	-1056.27
36.7	-61.4929	-61.4319	-62.3474	-61.7676	-62.7747							36.7	-58.4717	-57.5561	-58.2886	-58.5937					36.7	-51.4526	-50.9644	-51.4221	-51.7578							36.65	1.29337	-2.5504	0.733871	-95.5273	-656.622	-926.535	-1056.88
36.75	-61.3098	-61.4929	-62.6831	-61.615	-62.7441							36.75	-58.3801	-57.5867	-58.197	-58.8379					36.75	-51.178	-51.2085	-51.3916	-51.6663							36.7	-1.75839	0.501358	1.6494	-98.2739	-656.927	-929.892	-1061.15
36.8	-61.1267	-61.3403	-62.561	-61.4014	-62.6221							36.8	-58.2886	-57.5256	-58.1055	-58.9905					36.8	-51.5442	-51.0864	-51.4526	-51.4832							36.75	-1.75839	-4.38145	6.53221	-96.4428	-657.538	-927.146	-1061.15
36.85	-61.4319	-61.3708	-62.6221	-61.676	-62.8052							36.85	-58.4106	-57.6172	-58.2581	-58.8074					36.85	-51.4221	-51.0864	-51.6357	-51.6663							36.8	0.683014	-4.99181	0.428696	-93.3911	-659.674	-933.555	-1060.85
36.9	-61.4624	-61.5234	-62.5915	-61.7065	-62.8357							36.9	-58.4717	-57.7698	-58.3496	-58.8379					36.9	-51.1475	-50.7812	-51.5747	-51.5747							36.85	1.90372	-3.46593	0.428696	-90.6445	-663.336	-932.334	-1058.71
36.95	-61.2183	-61.554	-62.2864	-61.5845	-62.8052							36.95	-58.5022	-57.7393	-58.3801	-58.5937					36.95	-51.5442	-51.0254	-51.6663	-51.5747							36.9	-2.06357	-1.02452	4.70116	-94.0014	-663.336	-932.334	-1058.71
37	-61.1572	-61.4929	-62.6526	-61.3403	-62.7136							37	-58.4717	-57.5867	-58.2275	-58.7158					37	-51.3611	-51.1169	-51.5137	-51.7578							36.95	-1.14804	-5.29698	1.34422	-94.3066	-661.505	-935.386	-1061.15
37.05	-61.4624	-61.4319	-62.5915	-61.7676	-62.6831							37.05	-58.4106	-57.6172	-58.3191	-58.8684					37.05	-51.178	-51.0254	-51.4221	-51.5442							37	0.683014	-5.90733	-0.181656	-92.1703	-660.284	-933.249	-1059.63
37.1	-61.4014	-61.1267	-62.4084	-61.615	-62.8662							37.1	-58.3496	-57.5867	-58.1665	-58.96					37.1	-51.4221	-51.0254	-51.3611	-51.5137							37.05	-1.45322	-3.46593	1.95457	-88.8134	-657.538	-934.775	-1058.71
37.15	-61.0962	-61.3403	-62.5	-61.5234	-62.8052							37.15	-58.2581	-57.4646	-58.0749	-58.8684					37.15	-51.5442	-50.7202	-51.4526	-51.7273							37.1	-3.89462	-0.108994	1.6494	-88.2031	-654.181	-937.522	-1057.19
37.2	-61.3098	-61.5845	-62.3474	-61.4624	-62.7747							37.2	-58.1665	-57.6172	-58.136	-58.8684					37.2	-51.239	-50.9338	-51.6663	-51.6663							37.15	-2.67392	-2.24522	-0.181656	-91.8652	-652.044	-933.86	-1057.19
37.25	-61.4014	-61.4624	-62.6831	-61.7981	-62.6526							37.25	-58.2275	-57.6782	-58.2581	-58.6548					37.25	-51.2695	-51.0864	-51.6357	-51.3611							37.2	-0.537689	-4.07628	1.6494	-91.8652	-652.96	-937.522	-1061.15
37.3	-61.3098	-61.4014	-62.4695	-61.615	-62.6526							37.3	-58.3496	-57.7087	-58.2581	-58.7158					37.3	-51.4832	-51.0864	-51.6663	-51.6968							37.25	-2.36874	-1.63487	3.17528	-91.2548	-653.57	-936.606	-1061.46
37.35	-61.0657	-61.3098	-62.1948	-61.4929	-62.8052							37.35	-58.3191	-57.7698	-58.2581	-58.96					37.35	-51.4221	-50.9338	-51.6052	-51.6968							37.3	-2.06357	2.33241	-0.792007	-88.2031	-653.265	-931.723	-1060.85
37.4	-61.3708	-61.2793	-62.6221	-61.554	-62.7747							37.4	-58.2581	-57.6477	-58.2886	-58.9294					37.4	-51.1169	-50.7507	-51.6968	-51.4526							37.35	0.377838	1.72206	1.03905	-90.3393	-652.044	-935.691	-1059.32
37.45	-61.2793	-61.4929	-62.561	-61.7981	-62.7747							37.45	-58.197	-57.5867	-58.2275	-58.7463					37.45	-51.4221	-51.0254	-51.5747	-51.6663							37.4	2.51407	-0.719345	4.70116	-93.6962	-650.213	-932.944	-1058.1
37.5	-61.2488	-61.4929	-62.2559	-61.6455	-62.5							37.5	-58.0444	-57.5561	-58.1055	-58.8074					37.5	-51.4221	-51.0864	-51.5137	-51.6968							37.45	-0.232513	0.196182	-0.181656	-91.2548	-648.687	-926.841	-1059.32
37.55	-60.9741	-61.4624	-62.561	-61.4624	-62.5915							37.55	-58.2275	-57.4951	-57.9834	-58.5937					37.55	-51.178	-51.0254	-51.5747	-51.5747							37.5	-0.232513	2.02724	-1.40236	-90.9496	-650.518	-929.587	-1059.02
37.6	-61.3403	-61.5234	-62.4695	-61.5845	-62.8662							37.6	-58.2275	-57.5561	-58.136	-58.6853					37.6	-51.3611	-50.8728	-51.6663	-51.5442							37.55	1.59854	3.55312	1.95457	-88.5082	-650.824	-926.23	-1057.8
37.65	-61.3098	-61.4319	-62.3169	-61.8286	-62.7441							37.65	-58.197	-57.7393	-58.2581	-58.8684					37.65	-51.3306	-50.8728	-51.8188	-51.7578							37.6	3.12442	-1.02452	1.95457	-88.5082	-651.129	-920.432	-1053.52
37.7	-61.1267	-61.2183	-62.561	-61.6455	-62.7441							37.7	-57.9834	-57.7393	-58.2886	-58.8684					37.7	-51.3916	-50.9338	-51.7883	-51.6357							37.65	-1.14804	-2.5504	-1.70754	-92.1703	-647.467	-922.568	-1050.78
37.75	-61.1267	-61.2793	-62.439	-61.4624	-62.5305							37.75	-58.2581	-57.7698	-58.197	-58.7769					37.75	-51.1475	-51.1475	-51.7883	-51.4832							37.7	-0.537689	-1.63487	1.34422	-92.1703	-649.908	-918.906	-1052.3
37.8	-61.2488	-61.5234	-62.2864	-61.6455	-62.5915							37.8	-58.1055	-57.7087	-58.2581	-58.8074					37.8	-51.5137	-51.0559	-51.5747	-51.6663							37.75	0.98819	1.11171	4.70116	-91.56	-649.908	-915.549	-1052.91
37.85	-61.2183	-61.554	-62.5915	-61.7981	-62.8967							37.85	-57.8918	-57.6172	-58.197	-58.7158					37.85	-51.3916	-51.178	-51.5747	-51.7578							37.8	2.81924	0.196182	0.12352	-88.5082	-646.856	-917.685	-1052.3
37.9	-61.0962	-61.4014	-62.561	-61.676	-62.8052							37.9	-58.197	-57.4646	-58.136	-58.5632					37.9	-51.178	-51.0254	-51.8188	-51.6357							37.85	-1.14804	-2.24522	0.12352	-89.1186	-647.162	-914.328	-1050.78
37.95	-61.0962	-61.3708	-62.1643	-61.4319	-62.7136							37.95	-58.136	-57.7393	-57.9834	-58.5937					37.95	-51.2695	-50.8423	-51.8494	-51.5137							37.9	-1.45322	-2.5504	3.48045	-93.3911	-648.993	-909.751	-1048.95
38	-61.3403	-61.2793	-62.561	-61.5234	-62.7136							38	-57.8003	-57.7087	-58.0749	-58.8379					38	-51.4526	-51.1169	-51.6663	-51.8494							37.95	0.683014	-2.24522	3.48045	-93.6962	-645.331	-914.328	-1046.81
38.05	-61.2488	-61.2488	-62.561	-61.7371	-62.5							38.05	-58.1665	-57.7393	-58.0139	-58.7769					38.05	-51.3611	-51.2695	-51.5137	-51.6968							38	1.90372	-0.108994	0.12352	-93.0859	-644.11	-909.751	-1048.03
38.1	-61.1572	-61.3098	-62.2253	-61.676	-62.7747							38.1	-58.136	-57.5561	-58.2581	-58.7158					38.1	-51.0254	-51.2695	-51.8188	-51.5442							38.05	-0.537689	-1.02452	1.03905	-90.9496	-645.025	-905.784	-1049.25
38.15	-61.0657	-61.4014	-62.439	-61.5234	-62.8052							38.15	-57.8308	-57.5867	-58.3191	-58.6853					38.15	-51.3916	-51.0559	-51.7578	-51.6663							38.1	-2.36874	-3.46593	4.0908	-89.7289	-640.143	-909.446	-1048.03
38.2	-61.3403	-61.4929	-62.5	-61.5234	-62.8052							38.2	-58.1665	-57.7698	-58.2581	-58.6853					38.2	-51.3306	-50.9949	-51.6052	-51.8494							38.15	-1.45322	-2.85558	1.03905	-92.1703	-641.668	-907.92	-1046.2
38.25	-61.1572	-61.4319	-62.2559	-61.8286	-62.7441							38.25	-57.9529	-57.7393	-58.1665	-58.5022					38.25	-51.2695	-51.0864	-51.6968	-51.6663							38.2	0.683014	-1.94005	-0.486832	-94.0014	-639.532	-904.563	-1043.45
38.3	-61.1877	-61.4014	-62.439	-61.676	-62.6221							38.3	-57.9834	-57.4036	-58.0444	-58.5632					38.3	-51.0559	-51.3611	-51.8494	-51.5442							38.25	-0.842865	-0.108994	1.03905	-92.7807	-634.039	-908.835	-1041.62
38.35	-61.1267	-61.0962	-62.5	-61.5845	-62.5305							38.35	-58.0139	-57.8308	-57.9529	-58.7463					38.35	-51.3611	-51.2695	-51.6663	-51.6968							38.3	-1.45322	0.196182	1.95457	-91.2548	-637.091	-907.004	-1044.06
38.4	-61.3098	-61.1877	-62.4084	-61.3403	-62.8357							38.4	-57.7393	-57.7087	-58.3191	-58.7463					38.4	-51.2695	-51.2085	-51.7578	-51.7883							38.35	-1.45322	-3.7711	-0.792007	-89.4238	-634.344	-902.427	-1045.9
38.45	-61.2183	-61.4319	-62.1033	-61.7371	-62.8052							38.45	-58.1055	-57.4646	-58.2581	-58.7158					38.45	-51.178	-51.178	-51.8799	-51.6357							38.4	0.98819	-3.7711	-0.181656	-89.1186	-632.818	-905.478	-1043.45
38.5	-61.2488	-61.3403	-62.561	-61.7676	-62.7136							38.5	-57.9834	-57.7087	-58.1665	-58.6548					38.5	-51.0864	-51.0559	-51.6663	-51.4526							38.45	1.59854	-3.7711	2.8701	-91.8652	-634.955	-903.342	-1040.71
38.55	-61.0352	-61.1877	-62.4084	-61.5845	-62.7441							38.55	-57.8003	-57.7087	-58.0139	-58.5937					38.55	-51.4221	-50.9949	-51.8799	-51.7273							38.5	-1.14804	-1.63487	2.56493	-91.2548	-629.461	-899.07	-1036.74
38.6	-61.2183	-61.1267	-62.2253	-61.4624	-62.6831							38.6	-58.0139	-57.4341	-58.3496	-58.4717					38.6	-51.3	-51.1475	-51.8799	-51.8188							38.55	-0.842865	-0.719345	-1.09718	-91.8652	-633.429	-902.121	-1033.08
38.65	-61.2793	-61.3708	-62.439	-61.5845	-62.5915							38.65	-57.8918	-57.7393	-58.1665	-58.4412					38.65	-51.2085	-51.2695	-51.5747	-51.6663							38.6	1.29337	-3.7711	1.03905	-90.6445	-631.903	-902.732	-1031.86
38.7	-61.3708	-61.3098	-62.4695	-61.7676	-62.7136							38.7	-58.0139	-57.6172	-58.1665	-58.4717					38.7	-51.178	-51.1475	-51.9714	-51.4221							38.65	3.73477	-4.38145	3.48045	-89.4238	-630.072	-899.375	-1033.08
38.75	-61.1877	-61.0657	-62.3779	-61.5845	-62.8357							38.75	-58.0444	-57.5256	-58.0444	-58.6548					38.75	-51.5442	-51.239	-51.8188	-51.6357							38.7	0.98819	-3.7711	1.6494	-89.4238	-633.429	-900.596	-1031.55
38.8	-61.0657	-61.2488	-62.1033	-61.4929	-62.8357							38.8	-57.6477	-57.7087	-58.3191	-58.6853					38.8	-51.4526	-51.0254	-51.7883	-51.7578							38.75	-0.842865	-1.94005	-0.486832	-92.1703	-626.715	-903.647	-1029.72
38.85	-61.3708	-61.2183	-62.561	-61.4014	-62.8052							38.85	-58.0749	-57.5561	-58.136	-58.6853					38.85	-51.2085	-50.8728	-51.8799	-51.6968							38.8	0.377838	1.72206	-0.181656	-92.1703	-630.987	-902.732	-1029.42
38.9	-61.3403	-61.1267	-62.3779	-61.676	-62.6526							38.9	-57.9529	-57.6782	-58.0749	-58.5632					38.9	-51.239	-51.0559	-51.6052	-51.3916							38.85	1.59854	-0.719345	4.0908	-91.56	-630.987	-902.121	-1027.89
38.95	-61.2183	-61.3098	-62.2864	-61.615	-62.439							38.95	-57.7393	-57.6782	-58.2275	-58.5632					38.95	-51.5137	-51.2695	-51.8799	-51.6357							38.9	2.51407	-2.5504	1.34422	-90.3393	-627.935	-906.089	-1026.36
39	-61.0962	-61.2183	-62.3169	-61.554	-62.6831							39	-58.0749	-57.4036	-58.1665	-58.4717					39	-51.5137	-51.178	-51.8188	-51.6968							38.95	0.072662	-1.63487	0.733871	-89.7289	-631.598	-905.784	-1027.89
39.05	-61.1877	-61.0046	-62.5	-61.4624	-62.8357							39.05	-57.9529	-57.7393	-58.2581	-58.4717					39.05	-51.3	-51.1475	-51.5747	-51.6968							39	-0.537689	-0.414169	0.733871	-89.4238	-629.767	-902.732	-1029.11
39.1	-61.3708	-61.3708	-62.4084	-61.3403	-62.7747							39.1	-57.8003	-57.5256	-58.3191	-58.2581					39.1	-51.2085	-51.0559	-51.9409	-51.4832							39.05	0.072662	-0.108994	4.0908	-90.9496	-627.325	-907.615	-1030.33
39.15	-61.3098	-61.2793	-62.1338	-61.615	-62.7441							39.15	-58.0444	-57.6477	-57.9529	-58.4106					39.15	-51.4526	-50.9949	-51.8188	-51.6052							39.1	1.59854	2.63759	2.25975	-94.0014	-631.292	-905.784	-1030.33
39.2	-61.2793	-61.0962	-62.4695	-61.5845	-62.7747							39.2	-57.9224	-57.7087	-58.3801	-58.5937					39.2	-51.4832	-50.7507	-51.9104	-51.8188							39.15	3.4296	-1.3297	1.34422	-94.9169	-627.02	-901.206	-1031.86
39.25	-61.1267	-61.2793	-62.4084	-61.615	-62.7136							39.25	-57.7087	-57.4036	-58.2275	-58.6548					39.25	-51.2695	-50.9644	-51.9104	-51.7273							39.2	1.59854	-2.85558	2.56493	-94.3066	-623.968	-900.29	-1031.55
39.3	-61.3708	-61.1267	-62.2864	-61.4929	-62.4084							39.3	-58.0749	-57.7087	-58.1055	-58.5327					39.3	-51.1169	-51.1169	-51.6357	-51.6663							39.25	-1.14804	-2.85558	5.61668	-92.4755	-624.579	-899.07	-1030.64
39.35	-61.4319	-61.3403	-62.1033	-61.4624	-62.5915							39.35	-57.8918	-57.7087	-58.2581	-58.4717					39.35	-51.4221	-51.0254	-52.0935	-51.5442							39.3	0.377838	-3.16075	5.92186	-90.3393	-620.306	-894.492	-1031.25
39.4	-61.4014	-61.3098	-62.439	-61.615	-62.7441							39.4	-57.7087	-57.4036	-58.1665	-58.4717					39.4	-51.3916	-50.9949	-51.9104	-51.9714							39.35	1.59854	-0.719345	2.25975	-90.6445	-618.17	-889.914	-1034.3
39.45	-61.2488	-61.1877	-62.3779	-61.5845	-62.8662							39.45	-57.9834	-57.7393	-58.3496	-58.5632					39.45	-51.3306	-50.9949	-51.6968	-51.6968							39.4	2.81924	-0.108994	4.39598	-92.4755	-620.306	-893.271	-1037.05
39.5	-61.1877	-61.3403	-62.2559	-61.554	-62.6526							39.5	-57.9834	-57.6477	-58.2886	-58.3496					39.5	-51.0864	-50.9949	-52.0019	-51.8494							39.45	-1.75839	-1.94005	5.61668	-95.2221	-618.17	-889.914	-1036.74
39.55	-61.4014	-61.0046	-62.2559	-61.4014	-62.6831							39.55	-57.6477	-57.5561	-58.0139	-58.197					39.55	-51.239	-50.7812	-51.9714	-51.5442							39.5	-2.67392	-4.07628	6.53221	-94.3066	-616.644	-885.642	-1034.6
39.6	-61.4319	-61.4319	-62.439	-61.2793	-62.6221							39.6	-57.9224	-57.7698	-58.3496	-58.2886					39.6	-51.4526	-50.8728	-51.7578	-51.9409							39.55	-1.75839	-1.94005	2.25975	-93.0859	-619.696	-886.557	-1032.47
39.65	-61.4014	-61.2793	-62.5305	-61.5234	-62.4695							39.65	-57.9224	-57.6172	-58.1055	-58.4717					39.65	-51.3916	-50.9338	-52.0325	-51.9104							39.6	-0.232513	-1.94005	2.8701	-92.1703	-616.949	-888.388	-1030.94
39.7	-61.3403	-61.2488	-62.2864	-61.615	-62.4695							39.7	-57.8918	-57.5256	-58.3191	-58.4412					39.7	-51.1475	-51.178	-52.0325	-51.8799							39.65	2.20889	-0.414169	4.0908	-91.8652	-613.592	-885.642	-1029.42
39.75	-61.1267	-61.2488	-62.2864	-61.5234	-62.561							39.75	-57.8003	-57.7698	-58.3191	-58.4412					39.75	-51.0254	-51.1475	-51.7578	-51.7578							39.7	0.683014	1.41688	7.75291	-89.1186	-618.475	-880.759	-1027.28
39.8	-61.3098	-61.0352	-62.4695	-61.4624	-62.7441							39.8	-57.9834	-57.5867	-58.1055	-58.3801					39.8	-51.3306	-51.0254	-52.1545	-51.6968							39.75	-1.45322	0.196182	5.61668	-91.8652	-615.423	-885.032	-1029.42
39.85	-61.554	-61.4319	-62.5	-61.1877	-62.7441							39.85	-57.8613	-57.5561	-58.3801	-58.2886					39.85	-51.3611	-51.0864	-52.0325	-52.0019							39.8	-0.842865	-1.63487	2.56493	-93.3911	-611.151	-885.032	-1031.86
39.9	-61.4319	-61.2793	-62.3169	-61.4319	-62.6221							39.9	-57.6172	-57.8003	-58.3191	-58.3801					39.9	-51.239	-51.1169	-51.7578	-51.9104							39.85	-0.537689	-2.5504	5.31151	-94.0014	-613.897	-883.811	-1035.21
39.95	-61.3403	-61.2793	-62.1948	-61.6455	-62.6526							39.95	-57.9529	-57.7698	-58.1055	-58.4412					39.95	-51.0254	-50.9949	-52.124	-52.0019							39.9	0.98819	-1.94005	8.05809	-93.6962	-614.203	-883.201	-1036.44
40	-61.1267	-61.3403	-62.439	-61.5234	-62.5915							40	-57.8003	-57.6477	-58.4106	-58.3191					40	-51.0254	-50.8728	-52.124	-51.8799							39.95	2.20889	-1.94005	9.27879	-93.3911	-611.151	-887.778	-1036.74
40.05	-61.2183	-61.1267	-62.4084	-61.5234	-62.439							40.05	-57.7393	-57.8918	-58.3496	-58.136					40.05	-51.3306	-50.9644	-51.8799	-51.8799							40	-0.232513	0.196182	5.00633	-94.3066	-610.54	-888.388	-1037.35
40.1	-61.5234	-61.3708	-62.3169	-61.4624	-62.3779							40.1	-57.7393	-57.8003	-58.0444	-58.4717					40.1	-51.2085	-51.1169	-52.0019	-52.0019							40.05	-1.45322	3.85829	4.70116	-92.1703	-612.982	-886.557	-1036.74
40.15	-61.4319	-61.4014	-62.1643	-61.3098	-62.6221							40.15	-57.8918	-57.5867	-58.3801	-58.3801					40.15	-51.1475	-51.2695	-52.1851	-51.9104							40.1	-0.537689	1.72206	5.31151	-90.9496	-611.456	-889.609	-1035.82
40.2	-61.4319	-61.0352	-62.4695	-61.5234	-62.7136							40.2	-57.8308	-57.9224	-58.3496	-58.1665					40.2	-51.0864	-51.1169	-52.124	-52.0325							40.15	0.683014	-0.108994	6.53221	-92.7807	-608.404	-892.051	-1032.47
40.25	-61.3098	-61.615	-62.439	-61.5845	-62.6221							40.25	-57.5256	-57.8613	-58.0139	-58.4717					40.25	-51.1169	-51.0864	-51.8799	-51.8188							40.2	2.20889	-1.02452	6.53221	-97.0532	-612.066	-891.44	-1031.25
40.3	-61.2488	-61.3403	-62.3474	-61.554	-62.5915							40.3	-57.9224	-57.7698	-58.3496	-58.3191					40.3	-51.2695	-51.1169	-52.2766	-51.8188							40.25	3.73477	1.41688	3.17528	-98.579	-612.066	-889.609	-1030.64
40.35	-61.4624	-61.1572	-62.0422	-61.5845	-62.439							40.35	-57.8308	-57.8613	-58.197	-58.197					40.35	-51.2695	-50.9644	-52.1545	-51.9409							40.3	0.072662	0.806534	2.8701	-97.9687	-609.32	-894.187	-1029.42
40.4	-61.3708	-61.4319	-62.4084	-61.4624	-62.5915							40.4	-57.8003	-57.9224	-58.0139	-58.4412					40.4	-51.2695	-50.9338	-51.9104	-51.9409							40.35	-1.14804	3.55312	3.17528	-97.3583	-609.32	-894.492	-1029.11
40.45	-61.4014	-61.4014	-62.4084	-61.2488	-62.8357							40.45	-57.7087	-57.9224	-58.2581	-58.4412					40.45	-50.9644	-51.239	-52.1851	-51.9409							40.4	-1.14804	4.16347	5.92186	-96.1376	-611.761	-892.356	-1027.28
40.5	-61.4014	-61.1572	-62.439	-61.615	-62.7136							40.5	-58.0749	-57.6782	-58.197	-58.1055					40.5	-51.1169	-51.178	-52.2156	-51.6968							40.45	0.377838	6.2997	4.0908	-95.2221	-607.794	-888.083	-1025.45
40.55	-61.3403	-61.5234	-62.0728	-61.676	-62.3779							40.55	-57.8918	-58.0749	-58.1055	-58.4412					40.55	-51.3	-51.2085	-52.1545	-51.6357							40.5	0.072662	2.94276	1.6494	-97.3583	-604.132	-889.914	-1023.31
40.6	-61.1267	-61.4624	-62.2864	-61.615	-62.6221							40.6	-57.7698	-57.8918	-58.2275	-58.3191					40.6	-51.3306	-50.9033	-52.0019	-51.9104							40.55	2.20889	2.02724	1.03905	-97.9687	-605.963	-888.999	-1022.4
40.65	-61.3403	-61.3098	-62.4084	-61.6455	-62.6831							40.65	-57.8003	-57.7087	-58.197	-58.2275					40.65	-51.2695	-51.0864	-52.3071	-51.8799							40.6	0.072662	0.501358	1.95457	-95.5273	-605.658	-885.032	-1020.57
40.7	-61.4624	-61.4624	-62.439	-61.615	-62.6221							40.7	-58.0749	-57.8308	-58.1665	-58.4106					40.7	-51.0864	-51.1475	-52.2156	-51.8494							40.65	-2.06357	1.11171	5.31151	-92.1703	-600.164	-879.538	-1019.65
40.75	-61.4319	-61.4014	-62.1643	-61.3098	-62.4084							40.75	-57.9834	-57.9529	-57.9834	-58.3496					40.75	-50.9338	-51.1475	-52.0019	-51.6052							40.7	-2.67392	0.501358	4.0908	-96.1376	-598.333	-880.149	-1019.04
40.8	-61.3403	-61.2183	-62.1338	-61.554	-62.7441							40.8	-57.7393	-57.8613	-58.3191	-58.3191					40.8	-51.3306	-51.0254	-52.1545	-51.5137							40.75	-1.45322	0.196182	1.6494	-95.5273	-600.164	-877.707	-1022.7
40.85	-61.1877	-61.6455	-62.3779	-61.6455	-62.5305							40.85	-57.9224	-57.6782	-58.2275	-58.4106					40.85	-51.3611	-51.2085	-52.2766	-51.6663							40.8	0.683014	1.11171	1.6494	-91.8652	-598.028	-874.656	-1024.84
40.9	-61.1877	-61.4624	-62.3779	-61.7981	-62.5							40.9	-58.0444	-57.9834	-58.0139	-58.136					40.9	-51.178	-51.1475	-52.2766	-51.8799							40.85	3.4296	2.63759	3.48045	-91.56	-592.23	-870.383	-1025.45
40.95	-61.2488	-61.2793	-62.1948	-61.6455	-62.6221							40.95	-57.9529	-57.8613	-58.136	-58.4717					40.95	-51.1475	-50.9033	-51.9409	-51.6663							40.9	2.81924	1.11171	5.00633	-93.0859	-594.061	-871.909	-1024.23
41	-61.4319	-61.5845	-61.9202	-61.6455	-62.5							41	-57.7393	-57.8918	-58.197	-58.4412					41	-50.9644	-51.3306	-52.3071	-51.6663							40.95	0.072662	-1.63487	6.83739	-89.1186	-594.977	-872.519	-1022.09
41.05	-61.4014	-61.554	-62.2559	-61.5234	-62.561							41.05	-58.0444	-57.8308	-58.136	-58.1665					41.05	-51.1475	-51.2695	-52.2461	-51.5442							41	0.072662	-1.3297	3.17528	-87.2875	-590.094	-871.909	-1026.06
41.1	-61.4014	-61.3403	-62.3779	-61.554	-62.6526							41.1	-58.0444	-57.9834	-57.9834	-58.5022					41.1	-51.2085	-50.9644	-52.2156	-51.5137							41.05	-0.232513	-1.3297	1.34422	-89.1186	-586.126	-867.942	-1028.81
41.15	-61.3098	-61.554	-62.2253	-61.554	-62.3169							41.15	-57.9834	-57.9834	-58.197	-58.3496					41.15	-51.1475	-51.3	-52.0935	-51.7273							41.1	0.98819	-0.108994	1.95457	-84.541	-588.568	-870.383	-1029.42
41.2	-61.2488	-61.4929	-62.0728	-61.7371	-62.6831							41.2	-57.8308	-57.7393	-58.197	-58.1665					41.2	-51.239	-51.178	-52.4292	-51.7883							41.15	0.98819	0.501358	3.17528	-85.7617	-587.652	-872.214	-1026.36
41.25	-61.0352	-61.4929	-61.9507	-61.7981	-62.5915							41.25	-57.9529	-57.8918	-58.0749	-58.5327					41.25	-51.1169	-51.1475	-52.2766	-51.7578							41.2	2.20889	0.196182	5.31151	-85.7617	-584.601	-873.13	-1031.25
41.3	-61.2793	-61.4014	-62.2559	-61.7676	-62.5							41.3	-58.1055	-57.9529	-58.1665	-58.3496					41.3	-50.8728	-51.2695	-52.1545	-51.6357							41.25	4.34512	2.63759	3.48045	-81.184	-579.413	-872.519	-1032.77
41.35	-61.4929	-61.5845	-62.2864	-61.7371	-62.561							41.35	-57.9224	-57.9834	-58.2275	-58.2275					41.35	-51.1169	-51.3	-52.1851	-51.4526							41.3	1.90372	3.24794	1.03905	-85.7617	-583.38	-871.604	-1030.64
41.4	-61.4624	-61.4624	-62.1338	-61.676	-62.3779							41.4	-57.7393	-57.6477	-58.197	-58.4717					41.4	-51.239	-51.3916	-52.4597	-51.4526							41.35	-0.232513	3.85829	1.6494	-82.4047	-583.075	-875.571	-1031.25
41.45	-61.2793	-61.4014	-62.0422	-61.5845	-62.6526							41.45	-57.8918	-57.9529	-57.9529	-58.4717					41.45	-51.2085	-51.3611	-52.4292	-51.7273							41.4	-0.842865	2.63759	0.428696	-80.8788	-581.549	-875.876	-1033.08
41.5	-61.3098	-61.6455	-61.8896	-61.615	-62.6526							41.5	-58.0444	-57.8613	-58.3191	-58.136					41.5	-51.2085	-51.1169	-52.1851	-51.7273							41.45	0.377838	0.806534	2.56493	-83.3203	-578.497	-874.961	-1029.72
41.55	-61.1267	-61.4929	-62.1948	-61.7676	-62.4084							41.55	-58.0139	-57.8613	-58.1665	-58.5632					41.55	-50.9949	-51.5747	-52.1851	-51.6968							41.5	0.98819	-0.414169	5.31151	-79.9633	-583.38	-871.604	-1027.28
41.6	-61.0962	-61.1877	-62.1948	-61.8591	-62.6831							41.6	-57.8308	-57.6477	-58.1665	-58.4717					41.6	-50.8423	-51.3916	-52.4292	-51.6357							41.55	1.29337	-2.24522	4.70116	-81.184	-583.685	-873.74	-1027.89
41.65	-61.2488	-61.615	-62.1338	-61.8896	-62.561							41.65	-57.7698	-57.9529	-58.0139	-58.2275					41.65	-50.9644	-51.239	-52.4292	-51.6052							41.6	2.51407	-2.5504	1.6494	-80.8788	-581.854	-874.961	-1023.92
41.7	-61.4014	-61.5845	-62.0117	-61.8286	-62.6526							41.7	-58.1055	-57.8613	-58.3496	-58.3801					41.7	-51.2085	-51.5137	-52.1545	-51.4832							41.65	3.73477	-1.94005	1.95457	-77.2167	-580.938	-874.656	-1023.62
41.75	-61.3098	-61.3403	-62.0117	-61.7981	-62.6831							41.75	-57.8918	-57.8613	-58.136	-58.3496					41.75	-51.0254	-51.3611	-52.2156	-51.5747							41.7	4.03995	-2.5504	3.17528	-80.5737	-583.99	-874.35	-1023.62
41.8	-61.3403	-61.3708	-62.0728	-61.676	-62.4084							41.8	-57.8918	-57.6172	-58.1055	-58.2581					41.8	-50.9949	-51.4832	-52.5207	-51.7578							41.75	0.377838	-2.5504	4.39598	-77.8271	-584.906	-873.435	-1018.43
41.85	-61.1572	-61.6455	-62.1948	-61.5845	-62.7747							41.85	-57.6477	-57.9834	-58.1055	-58.2581					41.85	-50.9949	-51.4832	-52.4597	-51.7578							41.8	-0.232513	-1.63487	5.31151	-78.7426	-583.38	-875.876	-1020.57
41.9	-61.0962	-61.554	-62.1948	-61.8591	-62.7136							41.9	-58.0139	-57.8918	-58.2886	-58.3191					41.9	-50.9033	-51.178	-52.3071	-51.7578							41.85	-0.232513	0.196182	5.31151	-79.9633	-581.244	-877.707	-1021.48
41.95	-61.4319	-61.2793	-62.1338	-62.0422	-62.3474							41.95	-57.8613	-57.8613	-58.197	-58.2886					41.95	-50.7812	-51.6357	-52.1851	-51.5747							41.9	0.072662	1.11171	3.17528	-75.0805	-582.769	-883.811	-1018.43
42	-61.2793	-61.5234	-61.8896	-61.7676	-62.7136							42	-57.8918	-57.6477	-58.0749	-58.0444					42	-50.9949	-51.5442	-52.5513	-51.4526							41.95	-0.842865	0.806534	1.6494	-78.4374	-583.99	-886.863	-1022.09
42.05	-61.2488	-61.5234	-61.9507	-61.8286	-62.7441							42.05	-57.6782	-57.9224	-58.0444	-58.3496					42.05	-51.178	-51.1475	-52.4597	-51.4526							42	-0.232513	1.11171	0.733871	-77.5219	-581.244	-888.388	-1020.57
42.1	-61.1572	-61.4014	-62.2253	-61.615	-62.4695							42.1	-57.8003	-57.8613	-58.2275	-58.2275					42.1	-51.0864	-51.5442	-52.3376	-51.6663							42.05	2.51407	-0.414169	1.34422	-73.5546	-576.361	-889.609	-1016.9
42.15	-61.4319	-61.4319	-62.1643	-61.8896	-62.8052							42.15	-57.9224	-57.8613	-58.3496	-58.1055					42.15	-51.0864	-51.5137	-52.1545	-51.6357							42.1	1.29337	-1.63487	3.17528	-77.2167	-577.581	-891.135	-1021.18
42.2	-61.3098	-61.615	-62.1643	-61.9202	-62.6831							42.2	-57.8308	-57.6782	-58.136	-58.1055					42.2	-50.9644	-51.239	-52.5207	-51.6357							42.15	-0.537689	-3.16075	4.39598	-75.6909	-578.497	-889.609	-1018.43
42.25	-60.9741	-61.4929	-62.0422	-61.7676	-62.439							42.25	-57.8308	-57.8003	-58.0749	-58.3191					42.25	-51.0559	-51.4526	-52.4902	-51.6663							42.2	-2.9791	-2.5504	2.25975	-70.5029	-577.887	-887.473	-1014.77
42.3	-61.3708	-61.3403	-61.8896	-61.676	-62.7441							42.3	-57.6782	-57.8918	-58.2886	-58.1055					42.3	-50.7507	-51.4221	-52.3987	-51.6663							42.25	-2.9791	-3.46593	-0.181656	-75.3857	-574.225	-887.778	-1016.9
42.35	-61.4319	-61.554	-62.0728	-62.0728	-62.6526							42.35	-57.8308	-57.8308	-58.1055	-57.9224					42.35	-51.0254	-51.239	-52.1851	-51.4526							42.3	-2.36874	-1.63487	-1.09718	-75.3857	-573.919	-888.999	-1013.55
42.4	-61.1267	-61.5845	-62.1948	-61.8591	-62.3169							42.4	-57.9834	-57.7393	-58.197	-58.0749					42.4	-51.1475	-51.4832	-52.4292	-51.3611							42.35	-1.75839	-1.02452	-0.486832	-70.1977	-576.666	-888.694	-1011.41
42.45	-61.4929	-61.4624	-62.1338	-61.615	-62.7136							42.45	-57.8613	-57.6172	-58.0444	-58.136					42.45	-51.239	-51.4526	-52.4902	-51.4526							42.4	1.90372	-0.719345	0.733871	-74.7753	-576.666	-885.947	-1014.16
42.5	-61.2793	-61.3403	-62.2253	-61.9202	-62.5915							42.5	-57.8918	-57.8613	-58.2581	-58.0139					42.5	-51.1169	-51.2695	-52.4292	-51.6052							42.45	-1.45322	-0.719345	1.95457	-74.7753	-575.445	-883.811	-1010.5
42.55	-61.3403	-61.5845	-62.0117	-61.9202	-62.561							42.55	-57.5867	-57.8613	-58.197	-57.8613					42.55	-51.0864	-51.3916	-52.2766	-51.6968							42.5	-1.75839	0.501358	5.00633	-70.808	-570.562	-882.285	-1010.8
42.6	-61.4014	-61.5845	-61.8896	-61.554	-62.4695							42.6	-57.8918	-57.7698	-58.2581	-58.1665					42.6	-51.0254	-51.4526	-52.2461	-51.6052							42.55	-0.232513	1.41688	3.48045	-74.165	-571.783	-879.233	-1014.16
42.65	-61.2183	-61.4929	-62.0728	-61.8896	-62.7136							42.65	-57.9529	-57.5256	-57.9529	-58.1055					42.65	-50.9338	-51.4221	-52.4902	-51.5442							42.6	2.51407	2.02724	1.95457	-74.165	-573.004	-877.097	-1013.55
42.7	-61.4014	-61.3708	-62.2864	-61.8286	-62.5915							42.7	-57.8918	-57.8613	-58.2886	-57.9834					42.7	-50.9644	-51.178	-52.5207	-51.5137							42.65	-0.232513	3.24794	0.733871	-72.0287	-570.257	-874.045	-1009.88
42.75	-61.3708	-61.6455	-62.1338	-61.7676	-62.3779							42.75	-57.7393	-57.8918	-58.3191	-57.8003					42.75	-51.0559	-51.5137	-52.3987	-51.5442							42.7	-0.842865	3.24794	2.56493	-71.7236	-565.68	-872.214	-1016.29
42.8	-61.0352	-61.554	-62.1643	-61.8591	-62.7136							42.8	-57.5867	-57.8003	-58.2275	-58.136					42.8	-51.2085	-51.4526	-52.2156	-51.4221							42.75	1.29337	4.77382	4.70116	-74.4702	-561.712	-872.214	-1015.38
42.85	-61.3403	-61.4929	-62.0117	-61.5234	-62.6831							42.85	-57.8308	-57.6782	-58.1055	-57.9529					42.85	-51.2085	-51.3306	-52.3071	-51.4526							42.8	3.12442	3.55312	6.83739	-72.0287	-563.238	-874.045	-1012.94
42.9	-61.2793	-61.4319	-61.9507	-61.8896	-62.4084							42.9	-57.9224	-57.6172	-58.1665	-57.8308					42.9	-51.239	-51.3611	-52.4597	-51.6357							42.85	-1.14804	2.33241	1.95457	-69.2822	-562.933	-874.961	-1015.68
42.95	-61.4319	-61.676	-62.0422	-61.8286	-62.561							42.95	-57.8003	-57.8308	-58.3801	-57.8003					42.95	-51.1169	-51.4832	-52.3376	-51.6968							42.9	-1.14804	1.11171	1.95457	-74.4702	-561.712	-874.35	-1019.35
43	-61.4624	-61.5845	-62.1643	-61.676	-62.6526							43	-57.7393	-57.8308	-58.2581	-57.9834					43	-51.0254	-51.4526	-52.1851	-51.6968							42.95	2.51407	0.196182	4.0908	-74.4702	-558.05	-872.214	-1018.43
43.05	-61.0962	-61.4014	-62.1643	-61.8591	-62.561							43.05	-57.5561	-57.7393	-58.2886	-57.9224					43.05	-51.0254	-51.3306	-52.1545	-51.6052							43	-2.9791	-1.3297	4.39598	-70.5029	-556.83	-870.993	-1014.46
43.1	-61.3708	-61.5234	-62.1643	-61.676	-62.5							43.1	-57.7698	-57.5867	-58.136	-57.9224					43.1	-50.9033	-51.6052	-52.2766	-51.6968							43.05	-0.232513	-0.414169	1.03905	-72.9443	-558.355	-869.162	-1019.65
43.15	-61.2183	-61.676	-62.2253	-61.8896	-62.7136							43.15	-57.8308	-57.6782	-58.3496	-57.7393					43.15	-50.9644	-51.4832	-52.3682	-51.6663							43.1	0.98819	-0.108994	0.12352	-74.7753	-559.271	-866.416	-1019.96
43.2	-61.4319	-61.5845	-61.9812	-61.8591	-62.6831							43.2	-57.7087	-57.8613	-58.3496	-58.0139					43.2	-51.178	-51.4221	-52.2461	-51.5442							43.15	-2.67392	-0.108994	5.31151	-72.0287	-557.135	-868.247	-1017.51
43.25	-61.4014	-61.4319	-61.8591	-61.5845	-62.561							43.25	-57.7087	-57.6782	-58.3801	-57.9529					43.25	-51.178	-51.4526	-52.2766	-51.4526							43.2	0.072662	-0.108994	1.34422	-70.1977	-553.167	-870.993	-1016.29
43.3	-61.1267	-61.4319	-62.1033	-61.8286	-62.7136							43.3	-57.6477	-57.6782	-58.1665	-57.8613					43.3	-51.1475	-51.6052	-52.063	-51.5747							43.25	-0.842865	-3.46593	1.03905	-73.5546	-550.116	-871.909	-1019.04
43.35	-61.4929	-61.676	-62.2864	-61.7371	-62.7136							43.35	-57.5256	-57.5867	-58.1055	-57.6782					43.35	-51.0254	-51.6357	-52.2156	-51.6357							43.3	-1.45322	-4.38145	4.39598	-73.8598	-550.726	-871.299	-1018.73
43.4	-61.3708	-61.5845	-62.1948	-61.8591	-62.6831							43.4	-57.8613	-57.6477	-58.5022	-57.9224					43.4	-50.8423	-51.4221	-52.3376	-51.7883							43.35	2.51407	-3.46593	0.428696	-70.1977	-551.031	-869.162	-1014.77
43.45	-61.2488	-61.5234	-62.1643	-61.7981	-62.5305							43.45	-57.8003	-57.7393	-58.3191	-57.9224					43.45	-50.9644	-51.6052	-52.3987	-51.7883							43.4	-2.06357	-1.02452	1.6494	-71.7236	-550.116	-872.825	-1018.12
43.5	-61.4014	-61.4014	-62.2559	-61.5845	-62.8052							43.5	-57.7393	-57.7087	-58.2886	-57.8308					43.5	-51.178	-51.6663	-52.3376	-51.8188							43.45	-0.842865	-2.24522	4.39598	-73.2495	-548.285	-874.045	-1019.65
43.55	-61.2793	-61.6455	-62.1338	-61.9507	-62.7136							43.55	-57.6477	-57.7087	-58.0749	-57.7698					43.55	-51.1475	-51.6052	-52.063	-51.8188							43.5	2.51407	-4.38145	0.733871	-70.808	-544.928	-872.825	-1018.43
43.6	-61.4319	-61.554	-61.8286	-61.9202	-62.561							43.6	-57.5256	-57.5256	-58.1665	-57.8308					43.6	-50.9644	-51.5137	-52.0935	-51.6663							43.55	-2.06357	-2.5504	3.48045	-66.8408	-546.759	-870.078	-1015.38
43.65	-61.3098	-61.5845	-61.9202	-61.615	-62.561							43.65	-57.5867	-57.5561	-58.4412	-57.9834					43.65	-50.9338	-51.7273	-52.3987	-51.5442							43.6	1.29337	0.501358	1.6494	-70.1977	-549.2	-874.35	-1019.65
43.7	-61.1877	-61.3708	-62.1948	-61.9812	-62.8967							43.7	-57.7393	-57.7393	-58.2275	-57.8308					43.7	-51.1475	-51.6663	-52.3987	-51.8799							43.65	-1.45322	-1.94005	1.34422	-69.5873	-550.421	-873.435	-1019.04
43.75	-61.4014	-61.6455	-62.3474	-61.8591	-62.7136							43.75	-57.7087	-57.7393	-58.2886	-57.7698					43.75	-51.178	-51.6052	-52.2156	-51.9409							43.7	-1.75839	-2.5504	4.70116	-66.2304	-547.369	-869.162	-1017.82
43.8	-61.4014	-61.676	-62.2253	-61.615	-62.5915							43.8	-57.6782	-57.7393	-58.0749	-57.6782					43.8	-50.9644	-51.5137	-52.124	-51.7883							43.75	2.81924	0.196182	1.03905	-65.0097	-544.012	-874.045	-1015.99
43.85	-61.0657	-61.5234	-62.0728	-61.9202	-62.6831							43.85	-57.6477	-57.5867	-58.136	-57.9224					43.85	-51.178	-51.7883	-52.0019	-51.6052							43.8	-1.75839	1.41688	4.39598	-68.6718	-542.486	-872.519	-1018.73
43.9	-61.3403	-61.4929	-62.2253	-61.7676	-62.8357							43.9	-57.5256	-57.5256	-58.3496	-57.8003					43.9	-51.2695	-51.6663	-52.2156	-51.8188							43.85	-0.842865	-2.24522	2.25975	-68.0615	-544.317	-867.026	-1019.04
43.95	-61.3708	-61.4624	-62.1033	-61.615	-62.7136							43.95	-57.4341	-57.6782	-58.2275	-57.8613					43.95	-50.8728	-51.5747	-52.3376	-51.8799							43.9	1.90372	-1.02452	1.03905	-66.5356	-544.622	-868.857	-1016.6
44	-61.2183	-61.615	-61.9507	-61.9507	-62.5							44	-57.7393	-57.8308	-58.197	-57.6477					44	-51.3	-51.4832	-52.1851	-51.7883							43.95	-2.06357	1.11171	5.61668	-64.3994	-542.181	-866.721	-1012.33
44.05	-61.2793	-61.5845	-62.1643	-61.9507	-62.7136							44.05	-57.8003	-57.6172	-58.197	-57.8003					44.05	-51.2085	-51.8188	-52.1851	-51.5747							44	-0.232513	-1.94005	2.25975	-68.977	-539.129	-861.228	-1014.77
44.1	-61.2793	-61.5845	-62.2864	-61.7065	-62.8357							44.1	-57.6782	-57.6477	-58.0444	-57.8918					44.1	-50.9644	-51.6357	-52.0935	-52.063							44.05	1.90372	-0.414169	6.83739	-67.1459	-536.383	-865.195	-1013.55
44.15	-61.3098	-61.4014	-62.2253	-62.1033	-62.7441							44.15	-57.6172	-57.4951	-58.2581	-57.9224					44.15	-51.3306	-51.5137	-52.0019	-51.8799							44.1	-1.75839	2.33241	2.8701	-63.4838	-533.941	-860.007	-1012.33
44.2	-61.3098	-61.4929	-62.0117	-61.9202	-62.4695							44.2	-57.5867	-57.5256	-58.3191	-57.8613					44.2	-51.2085	-51.3916	-52.124	-51.6052							44.15	0.072662	-2.24522	3.17528	-63.4838	-534.857	-859.092	-1008.36
44.25	-61.3403	-61.676	-62.0422	-61.6455	-62.7136							44.25	-57.5256	-57.7698	-58.2886	-57.6477					44.25	-51.178	-51.6968	-52.3376	-51.9714							44.2	2.81924	-0.414169	6.22704	-65.9252	-533.941	-860.007	-1011.11
44.3	-61.3098	-61.5845	-62.2864	-61.9812	-62.7136							44.3	-57.6782	-57.7393	-58.136	-57.8613					44.3	-51.3306	-51.6357	-52.1545	-51.8799							44.25	-2.36874	1.72206	1.34422	-64.7045	-530.279	-855.124	-1012.02
44.35	-61.0962	-61.5845	-62.2253	-61.9507	-62.7747							44.35	-57.8308	-57.6172	-58.0749	-58.0444					44.35	-51.0864	-51.5747	-52.124	-51.6052							44.3	-1.14804	-1.94005	3.78563	-62.8735	-529.364	-859.702	-1011.41
44.4	-61.4929	-61.3403	-62.0422	-61.8286	-62.439							44.4	-57.7698	-57.6477	-58.2581	-57.8613					44.4	-51.3	-51.3306	-51.9409	-51.8799							44.35	2.51407	-0.108994	1.34422	-63.4838	-526.007	-855.124	-1008.66
44.45	-61.3403	-61.5845	-62.2559	-61.9507	-62.5915							44.45	-57.7698	-57.5256	-58.4106	-57.8918					44.45	-51.3916	-51.6663	-51.8799	-51.7883							44.4	-2.36874	5.38417	1.34422	-67.7563	-523.565	-855.735	-1009.27
44.5	-61.0046	-61.676	-62.1948	-62.0422	-62.7136							44.5	-57.6172	-57.4341	-58.2886	-57.6477					44.5	-51.1169	-51.6968	-52.0019	-51.6968							44.45	-3.28427	-1.3297	5.31151	-67.1459	-523.565	-857.871	-1010.19
44.55	-61.4014	-61.676	-62.0422	-61.9202	-62.7136							44.55	-57.5561	-57.7393	-58.2275	-57.9529					44.55	-51.3916	-51.6357	-52.1851	-51.8494							44.5	0.98819	-1.02452	1.03905	-64.3994	-525.702	-852.073	-1008.66
44.6	-61.4014	-61.5234	-62.2864	-61.7676	-62.5915							44.6	-57.4341	-57.7393	-58.1665	-58.0139					44.6	-51.3611	-51.4526	-52.0325	-51.7273							44.55	-1.45322	3.24794	1.34422	-63.789	-523.871	-856.955	-1005.92
44.65	-61.2183	-61.3098	-62.1643	-62.0422	-62.561							44.65	-57.6172	-57.6172	-58.1055	-57.8918					44.65	-51.3	-51.5747	-51.9409	-51.8494							44.6	-3.58945	-0.108994	6.53221	-67.4511	-523.565	-855.124	-1003.78
44.7	-61.2488	-61.554	-61.9812	-61.9507	-62.8052							44.7	-57.8003	-57.7393	-58.197	-57.7393					44.7	-51.4526	-51.8799	-51.9409	-51.8494							44.65	-2.06357	-1.63487	1.03905	-67.4511	-521.124	-852.683	-1007.75
44.75	-61.3403	-61.7065	-62.2864	-61.7371	-62.7441							44.75	-57.7087	-57.6172	-58.3191	-57.7087					44.75	-51.178	-51.6968	-51.8494	-51.6052							44.7	-0.537689	-0.108994	2.8701	-64.3994	-518.683	-854.514	-1007.14
44.8	-61.2183	-61.615	-62.3474	-62.1338	-62.6831							44.8	-57.7087	-57.4951	-58.3191	-57.9834					44.8	-51.4832	-51.5442	-51.7883	-51.9409							44.75	-3.89462	1.41688	6.22704	-61.6528	-517.462	-851.157	-1005.92
44.85	-61.1572	-61.4929	-61.9507	-61.9202	-62.5							44.85	-57.6782	-57.6172	-58.3496	-57.9529					44.85	-51.3916	-51.4526	-52.063	-51.8188							44.8	-2.9791	-2.85558	1.95457	-65.0097	-518.988	-850.852	-1002.56
44.9	-61.3098	-61.3098	-62.3169	-61.8591	-62.7136							44.9	-57.6172	-57.8308	-58.197	-57.8308					44.9	-51.0864	-51.8188	-52.0935	-51.6357							44.85	0.683014	-2.24522	3.48045	-65.3149	-518.988	-852.378	-1005
44.95	-61.3098	-61.5845	-62.1948	-61.8896	-62.6831							44.95	-57.4341	-57.7087	-58.0139	-57.8613					44.95	-51.5442	-51.7883	-51.9409	-51.8799							44.9	-1.14804	0.501358	8.36327	-64.7045	-519.598	-848.41	-1006.22
45	-61.0962	-61.7981	-62.2253	-62.1643	-62.6831							45	-57.5256	-57.7698	-58.0444	-57.7393					45	-51.3306	-51.6663	-52.0325	-51.6968							44.95	-2.06357	-0.719345	2.25975	-60.1269	-519.293	-849.936	-1003.48
45.05	-61.3403	-61.5234	-62.2864	-61.9812	-62.4695							45.05	-57.6782	-57.6477	-58.3496	-57.8003					45.05	-51.0864	-51.5747	-51.8799	-51.7578							45	1.29337	-2.85558	2.25975	-64.7045	-516.852	-850.547	-1001.65
45.1	-61.3403	-61.5234	-61.9202	-61.676	-62.6831							45.1	-57.7393	-57.6477	-58.3496	-57.8918					45.1	-51.5137	-51.6052	-51.8799	-51.8188							45.05	3.12442	-2.5504	6.53221	-66.2304	-516.241	-847.8	-999.509
45.15	-61.2183	-61.3708	-62.3779	-62.0422	-62.7747							45.15	-57.7087	-57.4951	-58.2581	-57.8613					45.15	-51.4221	-51.7578	-51.8188	-51.6357							45.1	-1.45322	0.196182	3.48045	-65.0097	-515.326	-850.852	-1001.65
45.2	-61.0657	-61.4319	-62.2253	-62.0422	-62.7747							45.2	-57.7087	-57.6782	-58.1665	-57.9224					45.2	-51.1169	-51.6663	-52.0019	-51.9409							45.15	-1.45322	-3.46593	2.25975	-63.1786	-518.072	-852.073	-1001.34
45.25	-61.4014	-61.5845	-62.3169	-61.8286	-62.6831							45.25	-57.8003	-57.7393	-58.136	-57.7087					45.25	-51.5137	-51.7273	-52.124	-51.9104							45.2	1.90372	-4.99181	5.92186	-61.6528	-519.293	-849.936	-1000.42
45.3	-61.3403	-61.5845	-62.2559	-61.7371	-62.561							45.3	-57.6477	-57.8003	-57.9834	-57.6477					45.3	-51.4221	-51.5747	-52.063	-51.6663							45.25	1.59854	-4.68663	3.17528	-65.9252	-519.293	-851.462	-996.457
45.35	-61.1267	-61.5845	-62.0422	-62.1338	-62.8052							45.35	-57.6172	-57.6782	-58.136	-57.8308					45.35	-51.1169	-51.7578	-52.0325	-52.0019							45.3	-1.45322	-2.24522	1.95457	-64.7045	-517.767	-852.988	-992.49
45.4	-61.2793	-61.4929	-62.3779	-62.0117	-62.8662							45.4	-57.5561	-57.8003	-58.2886	-57.9529					45.4	-51.5137	-51.8799	-51.9104	-51.8494							45.35	-0.232513	-4.68663	3.48045	-63.789	-515.02	-849.326	-994.931
45.45	-61.3708	-61.3098	-62.2864	-61.8896	-62.8052							45.45	-57.6477	-57.6172	-58.2886	-57.8003					45.45	-51.3	-51.8188	-51.8188	-51.7273							45.4	3.12442	-7.12804	3.78563	-61.0424	-512.274	-847.8	-993.405
45.5	-61.2793	-61.4624	-62.0728	-61.8591	-62.7136							45.5	-57.8308	-57.4951	-58.1665	-57.8003					45.5	-51.1475	-51.6663	-51.7273	-51.8494							45.45	1.59854	-5.29698	0.12352	-62.8735	-508.307	-850.852	-991.879
45.55	-60.9741	-61.6455	-62.3169	-62.0728	-62.5915							45.55	-57.8003	-57.6172	-58.197	-57.5867					45.55	-51.3611	-51.4221	-51.9409	-52.0935							45.5	-0.537689	-4.07628	1.95457	-64.3994	-505.865	-845.969	-987.607
45.6	-61.4014	-61.6455	-62.1643	-62.0728	-62.9578							45.6	-57.7393	-57.7393	-58.0749	-57.7698					45.6	-51.4526	-51.7273	-51.9714	-51.9104							45.55	1.59854	-2.5504	3.48045	-63.789	-505.255	-842.917	-986.081
45.65	-61.3708	-61.6455	-62.3474	-61.676	-62.8967							45.65	-57.8613	-57.8003	-58.0444	-57.8308					45.65	-51.3306	-51.8799	-52.0935	-51.8494							45.6	4.95547	-5.29698	-0.792007	-62.5683	-505.255	-845.054	-988.828
45.7	-61.2488	-61.4319	-62.2253	-61.9202	-62.9272							45.7	-57.6477	-57.8003	-58.0749	-57.8003					45.7	-51.239	-51.7883	-52.0325	-52.0325							45.65	1.29337	-4.07628	0.12352	-59.2114	-501.288	-842.307	-990.964
45.75	-61.1267	-61.3708	-62.1338	-62.0422	-62.6831							45.75	-57.5561	-57.7087	-58.3496	-57.8613					45.75	-51.4526	-51.5747	-52.063	-51.9714							45.7	0.377838	-2.85558	4.39598	-62.2631	-498.541	-836.509	-991.269
45.8	-61.4014	-61.5234	-62.3169	-61.9812	-62.6831							45.8	-57.8308	-57.7393	-58.2275	-57.8613					45.8	-51.5137	-51.5137	-51.9409	-51.8188							45.75	0.98819	0.806534	0.733871	-63.4838	-494.879	-838.645	-989.743
45.85	-61.3098	-61.676	-62.3169	-61.7676	-62.9272							45.85	-57.8308	-57.6172	-58.2275	-57.5561					45.85	-51.1169	-51.6663	-51.8799	-52.063							45.8	3.4296	-1.63487	0.428696	-62.5683	-492.437	-837.729	-992.185
45.9	-61.2183	-61.6455	-62.0422	-61.8896	-63.0798							45.9	-57.7087	-57.5561	-58.197	-57.5561					45.9	-51.4221	-51.8799	-51.6968	-52.0019							45.85	-0.537689	-2.85558	4.70116	-61.6528	-494.574	-835.288	-996.152
45.95	-61.1267	-61.615	-62.3779	-61.9812	-62.9883							45.95	-57.5256	-57.5561	-58.1055	-57.8918					45.95	-51.4526	-51.6663	-51.8799	-51.7578							45.9	-1.75839	-3.7711	4.70116	-58.601	-491.827	-834.067	-999.814
46	-61.3708	-61.5234	-62.2864	-61.8896	-62.7441							46	-57.8613	-57.6172	-58.1055	-57.9529					46	-51.3306	-51.6357	-52.0019	-51.9714							45.95	-1.14804	-0.719345	1.6494	-60.4321	-489.386	-838.034	-999.509
46.05	-61.2488	-61.5234	-62.0117	-61.7676	-62.7441							46.05	-57.8308	-57.8003	-58.0749	-57.7393					46.05	-51.3306	-51.5137	-52.0019	-51.9714							46	2.20889	-1.3297	2.56493	-62.8735	-485.418	-836.509	-998.898
46.1	-61.1572	-61.3708	-62.3779	-62.0117	-63.0493							46.1	-57.7087	-57.8308	-58.1055	-57.7698					46.1	-51.4221	-51.6052	-52.0019	-51.9409							46.05	-0.842865	-4.99181	5.92186	-62.5683	-488.165	-835.288	-996.762
46.15	-61.1267	-61.6455	-62.439	-61.9202	-63.0798							46.15	-57.6477	-57.6782	-58.2886	-57.7698					46.15	-51.5137	-51.7273	-52.0019	-51.8799							46.1	-2.06357	-4.68663	3.17528	-61.0424	-486.944	-840.476	-998.898
46.2	-61.4319	-61.676	-62.1338	-61.8591	-63.0188							46.2	-57.9224	-57.7393	-58.2886	-57.7393					46.2	-51.239	-51.7273	-51.8494	-52.124							46.15	-0.842865	-3.7711	1.03905	-57.9907	-483.587	-840.171	-1000.12
46.25	-61.3708	-61.5845	-62.3169	-61.676	-62.8967							46.25	-57.8918	-57.4646	-58.2275	-57.7698					46.25	-51.5137	-51.6663	-52.0019	-51.9714							46.2	1.59854	-0.414169	4.0908	-58.2958	-488.165	-839.866	-998.593
46.3	-61.1877	-61.615	-62.2559	-61.9202	-62.7441							46.3	-57.7087	-57.6172	-58.1665	-57.9529					46.3	-51.5442	-51.6357	-52.063	-51.7883							46.25	-0.232513	-1.02452	3.78563	-62.2631	-489.386	-841.697	-997.373
46.35	-61.1267	-61.5845	-62.2559	-61.9202	-63.0798							46.35	-57.8308	-57.7393	-58.1665	-58.0139					46.35	-51.5747	-51.5137	-52.0019	-51.8188							46.3	-1.75839	-3.7711	0.428696	-59.5165	-486.639	-847.8	-994.321
46.4	-61.4014	-61.3708	-62.3474	-61.9202	-63.0493							46.4	-57.7087	-57.6172	-58.0749	-57.9834					46.4	-51.239	-51.5747	-51.7883	-52.063							46.35	-1.45322	-2.5504	1.95457	-58.9062	-490.912	-847.8	-991.879
46.45	-61.3403	-61.4319	-62.2864	-61.676	-63.0493							46.45	-57.8003	-57.5867	-57.9834	-57.8918					46.45	-51.6357	-51.8799	-51.9409	-52.0325							46.4	0.98819	-2.5504	5.00633	-55.5493	-491.827	-845.359	-993.405
46.5	-61.2488	-61.7065	-62.2864	-61.8591	-62.9272							46.5	-57.7393	-57.4951	-58.0139	-57.8613					46.5	-51.4832	-51.7883	-52.0019	-51.6663							46.45	1.90372	1.41688	4.0908	-55.8544	-486.029	-849.936	-995.236
46.55	-61.0962	-61.7676	-62.1643	-61.9507	-62.9578							46.55	-57.5561	-57.8613	-58.197	-57.8003					46.55	-51.4832	-51.6968	-51.9104	-51.9104							46.5	-1.14804	-0.719345	1.03905	-58.2958	-490.301	-850.852	-994.321
46.6	-61.5234	-61.6455	-62.5305	-61.8591	-62.8357							46.6	-57.9224	-57.6477	-58.197	-57.8308					46.6	-51.4221	-51.5747	-51.9409	-52.0325							46.55	-1.14804	-4.99181	2.25975	-58.2958	-488.47	-849.021	-992.185
46.65	-61.4319	-61.615	-62.2864	-61.676	-63.0493							46.65	-57.8308	-57.4036	-58.1055	-57.9529					46.65	-51.6357	-51.4526	-52.063	-51.9104							46.6	0.98819	-4.07628	3.48045	-57.6855	-485.418	-844.748	-990.659
46.7	-61.2183	-61.4014	-62.1643	-61.7676	-63.0798							46.7	-57.5561	-57.6782	-57.9529	-58.0749					46.7	-51.5137	-51.6052	-51.8799	-51.6052							46.65	1.29337	-3.7711	-0.181656	-56.77	-486.029	-848.105	-989.133
46.75	-61.1572	-61.5234	-62.439	-62.0728	-63.0493							46.75	-57.7698	-57.5867	-57.8613	-58.0444					46.75	-51.4526	-51.8188	-51.9104	-51.8799							46.7	-2.06357	-1.94005	-1.09718	-54.9389	-481.146	-846.885	-991.574
46.8	-61.4014	-61.7371	-62.4084	-61.9202	-62.9883							46.8	-57.6782	-57.4341	-58.136	-58.1055					46.8	-51.5442	-51.6968	-51.9714	-51.9409							46.75	-2.36874	-4.07628	1.03905	-54.9389	-483.282	-842.002	-992.49
46.85	-61.4624	-61.6455	-62.1643	-61.8286	-62.9578							46.85	-57.8308	-57.6172	-58.0749	-57.9224					46.85	-51.6357	-51.7273	-51.7883	-51.8799							46.8	-1.75839	-6.21251	2.25975	-58.2958	-482.367	-840.171	-991.879
46.9	-61.3403	-61.5845	-62.1948	-61.7371	-62.8967							46.9	-57.6477	-57.6477	-57.9224	-57.9224					46.9	-51.6052	-51.5747	-51.9714	-51.6968							46.85	1.59854	-6.21251	-2.01271	-58.2958	-476.873	-843.528	-991.879
46.95	-61.1877	-61.5234	-62.3474	-61.9812	-63.1103							46.95	-57.4036	-57.373	-57.8308	-57.8613					46.95	-51.3916	-51.5137	-52.063	-51.9714							46.9	-0.537689	-5.29698	0.428696	-59.8217	-480.841	-843.528	-990.354
47	-61.3098	-61.7676	-62.3779	-62.0728	-63.1409							47	-57.7698	-57.5867	-58.136	-58.0749					47	-51.5747	-51.6052	-51.6663	-52.0325							46.95	-3.28427	-3.7711	2.56493	-58.9062	-477.789	-840.476	-988.217
47.05	-61.5234	-61.676	-61.9812	-61.9507	-63.0493							47.05	-57.6477	-57.4646	-58.0139	-58.1055					47.05	-51.6663	-51.7578	-52.0019	-51.8799							47	-2.36874	-2.24522	4.70116	-57.0751	-480.23	-842.612	-989.438
47.1	-61.3708	-61.4014	-62.3779	-61.8896	-63.0493							47.1	-57.5256	-57.373	-57.7698	-58.1665					47.1	-51.5747	-51.7883	-51.8494	-51.7273							47.05	0.683014	-3.16075	1.34422	-58.2958	-482.672	-847.495	-990.964
47.15	-61.3098	-61.7371	-62.3169	-61.8896	-62.9578							47.15	-57.6172	-57.6477	-58.0444	-58.197					47.15	-51.4221	-51.7273	-51.9714	-52.0325							47.1	2.81924	-4.07628	2.56493	-60.7372	-478.705	-849.021	-990.964
47.2	-61.1572	-61.7981	-62.1033	-62.0728	-62.9272							47.2	-57.4341	-57.373	-57.9834	-58.2581					47.2	-51.5137	-51.7883	-52.0019	-52.0019							47.15	-1.14804	-4.07628	5.61668	-61.6528	-484.503	-846.885	-989.133
47.25	-61.5234	-61.4624	-62.2253	-61.9812	-63.1103							47.25	-57.6782	-57.4341	-57.6782	-58.1055					47.25	-51.6357	-51.6357	-51.6968	-51.9104							47.2	-2.36874	-3.46593	7.14256	-59.8217	-482.672	-849.021	-986.081
47.3	-61.4319	-61.7676	-62.2559	-61.9202	-63.2324							47.3	-57.5256	-57.4036	-57.9834	-58.0749					47.3	-51.6052	-51.5442	-52.063	-51.7578							47.25	-0.842865	-0.719345	2.56493	-59.2114	-483.587	-854.209	-983.029
47.35	-61.3098	-61.7371	-62.2559	-61.7065	-63.0493							47.35	-57.312	-57.251	-58.0139	-58.1665					47.35	-51.5137	-51.6052	-52.0325	-51.9714							47.3	0.683014	-1.02452	2.8701	-58.601	-485.113	-855.124	-980.893
47.4	-61.1572	-61.4929	-62.0422	-62.1338	-63.1103							47.4	-57.6782	-57.4951	-57.6782	-58.0749					47.4	-51.4526	-51.8799	-51.8494	-52.0325							47.35	1.90372	-4.38145	5.92186	-57.0751	-481.451	-852.988	-980.893
47.45	-61.2793	-61.7981	-62.2864	-62.1643	-62.9272							47.45	-57.6477	-57.3425	-57.9529	-58.0749					47.45	-51.7273	-51.8494	-51.9714	-51.9714							47.4	-1.75839	-4.99181	6.22704	-60.1269	-484.503	-854.209	-982.419
47.5	-61.4014	-61.6455	-62.2253	-62.1338	-62.7747							47.5	-57.251	-57.4951	-57.7393	-58.197					47.5	-51.5747	-51.8188	-51.8188	-51.6357							47.45	-1.45322	-4.68663	3.17528	-62.5683	-485.113	-857.871	-982.724
47.55	-61.3403	-61.676	-62.1338	-61.9812	-62.8967							47.55	-57.6172	-57.373	-57.8308	-58.3191					47.55	-51.5137	-51.8188	-52.0935	-51.9409							47.5	-0.232513	-1.94005	3.17528	-63.1786	-479.925	-856.65	-982.419
47.6	-61.3098	-61.7981	-62.1033	-61.9202	-63.1714							47.6	-57.5867	-57.0984	-57.8918	-58.3801					47.6	-51.3916	-51.7273	-52.0935	-52.124							47.55	2.81924	1.11171	4.39598	-62.5683	-482.367	-854.514	-981.809
47.65	-61.1267	-61.3403	-62.3169	-62.1338	-63.1714							47.65	-57.4341	-57.4646	-57.6477	-58.1665					47.65	-51.7273	-51.6052	-51.7273	-52.0019							47.6	3.73477	-1.02452	6.83739	-61.3476	-483.282	-854.819	-979.978
47.7	-61.1877	-61.7371	-62.2253	-62.1948	-63.1103							47.7	-57.5561	-57.4036	-57.8613	-58.2275					47.7	-51.6357	-51.7578	-52.063	-51.6357							47.65	0.377838	-3.7711	2.25975	-58.9062	-478.094	-856.65	-976.621
47.75	-61.3403	-61.6455	-62.0728	-62.1643	-63.1409							47.75	-57.5256	-57.1594	-57.8613	-58.1665					47.75	-51.5747	-51.8494	-52.0019	-51.8188							47.7	-0.232513	-4.68663	1.6494	-59.5165	-481.146	-855.735	-976.926
47.8	-61.3098	-61.7371	-62.1338	-62.1643	-63.1103							47.8	-57.4951	-57.4341	-57.7393	-58.1665					47.8	-51.4221	-51.9714	-51.8494	-52.124							47.75	0.98819	-4.38145	2.56493	-60.4321	-481.146	-852.988	-976.315
47.85	-61.2488	-61.676	-62.1948	-61.9812	-62.8967							47.85	-57.5867	-57.312	-57.8918	-57.9529					47.85	-51.6052	-51.9104	-52.063	-52.0325							47.8	1.59854	-3.7711	5.31151	-62.8735	-476.568	-851.462	-976.01
47.9	-61.2488	-61.4624	-62.1643	-62.1338	-62.8052							47.9	-57.5867	-57.2205	-57.6782	-58.1055					47.9	-51.6968	-52.0019	-51.8799	-51.7883							47.85	2.51407	-0.719345	3.78563	-63.1786	-478.399	-853.598	-973.264
47.95	-61.0046	-61.7371	-61.9507	-62.2253	-63.0798							47.95	-57.5256	-57.5256	-57.8918	-58.2886					47.95	-51.6052	-52.0019	-51.8494	-51.6968							47.9	0.072662	-0.719345	0.428696	-63.1786	-475.958	-853.904	-971.738
48	-61.3098	-61.6455	-62.1948	-62.2864	-63.1714							48	-57.4951	-57.251	-57.8613	-58.2886					48	-51.5747	-51.8494	-52.0935	-51.8799							47.95	-2.67392	-2.5504	2.25975	-62.8735	-470.465	-852.683	-969.296
48.05	-61.2488	-61.7371	-62.2253	-62.1948	-63.0798							48.05	-57.7087	-57.2205	-57.5561	-58.136					48.05	-51.3916	-51.7883	-51.9714	-51.9714							48	-1.45322	-4.99181	4.0908	-60.7372	-469.549	-849.631	-965.329
48.1	-61.3403	-61.7065	-62.1948	-61.9202	-63.0188							48.1	-57.5256	-57.373	-57.8613	-58.1055					48.1	-51.7578	-51.8188	-51.6968	-51.8188							48.05	-0.842865	-4.38145	3.78563	-59.8217	-470.77	-852.988	-962.888
48.15	-61.0962	-61.554	-61.9202	-62.1338	-63.1103							48.15	-57.312	-57.312	-57.7087	-57.9529					48.15	-51.6052	-52.0019	-51.9714	-51.6052							48.1	1.90372	-4.38145	0.428696	-61.0424	-466.803	-852.683	-961.972
48.2	-60.9741	-61.7981	-62.1948	-62.4084	-62.9883							48.2	-57.6172	-57.1289	-57.6172	-58.2581					48.2	-51.6968	-52.0325	-51.9409	-51.6357							48.15	1.29337	-3.16075	1.03905	-63.4838	-465.277	-852.073	-964.108
48.25	-61.1877	-61.5845	-62.2864	-62.3169	-62.8357							48.25	-57.5867	-57.3425	-57.8308	-58.2275					48.25	-51.3916	-52.0325	-51.6968	-51.8799							48.2	-1.75839	-2.5504	1.6494	-63.4838	-469.854	-847.495	-964.414
48.3	-61.2488	-61.7371	-62.1948	-62.1948	-62.7441							48.3	-57.4036	-57.2815	-57.6477	-58.2275					48.3	-51.4526	-52.0019	-51.9104	-51.7273							48.25	-1.75839	-4.38145	4.39598	-62.5683	-468.939	-845.359	-964.414
48.35	-61.3098	-61.7371	-61.9202	-62.1033	-63.0188							48.35	-57.5256	-57.2205	-57.7087	-57.9834					48.35	-51.7273	-52.124	-51.9104	-51.6663							48.3	-0.842865	-5.90733	3.17528	-61.6528	-464.361	-847.495	-963.498
48.4	-61.2488	-61.4624	-62.2253	-62.1033	-63.0188							48.4	-57.6782	-57.373	-57.8003	-58.2581					48.4	-51.6968	-51.9409	-51.6968	-51.4832							48.35	0.377838	-7.73839	1.03905	-61.9579	-468.634	-846.885	-964.108
48.45	-61.0046	-61.7981	-62.3169	-62.439	-63.0798							48.45	-57.6477	-57.2815	-57.6172	-58.136					48.45	-51.6357	-51.8799	-51.8494	-51.6052							48.4	0.98819	-7.73839	2.25975	-60.1269	-468.023	-845.664	-962.888
48.5	-61.1572	-61.7065	-62.2559	-62.3169	-63.0493							48.5	-57.4036	-57.0984	-57.6477	-58.1665					48.5	-51.3306	-51.7883	-51.8799	-51.7273							48.45	0.072662	-8.04356	3.48045	-58.2958	-463.751	-841.086	-961.057
48.55	-61.2793	-61.5845	-61.9812	-62.2559	-63.0188							48.55	-57.6477	-57.373	-57.7698	-58.136					48.55	-51.5747	-51.8188	-51.6968	-51.6052							48.5	-2.67392	-5.29698	5.92186	-57.3803	-465.277	-842.612	-959.531
48.6	-61.2183	-61.7676	-62.1338	-62.2559	-62.8052							48.6	-57.6782	-57.2205	-57.6477	-58.2886					48.6	-51.7273	-52.0019	-51.6968	-51.5442							48.55	-2.67392	-3.16075	2.8701	-59.5165	-464.972	-846.274	-958.615
48.65	-61.3098	-61.6455	-62.2559	-62.1643	-62.8967							48.65	-57.6172	-57.0984	-57.6477	-58.1665					48.65	-51.6663	-52.0019	-51.9409	-51.3306							48.6	-2.06357	-2.5504	2.25975	-61.9579	-461.615	-845.969	-960.141
48.7	-61.2183	-61.554	-62.2253	-62.1338	-63.1409							48.7	-57.4341	-57.2815	-57.8003	-58.136					48.7	-51.4832	-51.9714	-51.7883	-51.5442							48.65	-0.842865	-3.46593	2.56493	-59.8217	-458.563	-843.528	-961.057
48.75	-60.9131	-61.7676	-62.0728	-62.3169	-63.1103							48.75	-57.7698	-57.3425	-57.7087	-58.2275					48.75	-51.4221	-51.8799	-51.4832	-51.6663							48.7	0.98819	-4.68663	4.0908	-59.2114	-460.089	-840.476	-961.362
48.8	-61.1267	-61.6455	-62.1643	-62.3779	-63.0188							48.8	-57.7087	-57.0984	-57.5561	-58.136					48.8	-51.5137	-51.7273	-51.9409	-51.5137							48.75	2.20889	-4.07628	6.53221	-57.6855	-458.868	-842.307	-961.667
48.85	-61.3708	-61.676	-62.3169	-62.3474	-62.7441							48.85	-57.4646	-57.0373	-57.7698	-58.1055					48.85	-51.7883	-51.7273	-51.8188	-51.5747							48.8	0.072662	-2.5504	3.78563	-57.6855	-454.596	-843.528	-959.836
48.9	-61.2793	-61.7065	-62.2253	-62.2864	-63.0798							48.9	-57.6782	-57.2815	-57.6782	-58.1665					48.9	-51.5747	-52.0325	-51.6357	-51.3611							48.85	-0.842865	-2.5504	1.6494	-60.4321	-456.732	-841.391	-959.226
48.95	-61.3098	-61.5845	-62.1643	-62.0728	-63.0188							48.95	-57.8003	-57.251	-57.4951	-58.0444					48.95	-51.6357	-51.9104	-51.7578	-51.4526							48.9	-0.537689	-1.3297	1.6494	-59.5165	-457.647	-838.645	-958.005
49	-61.2183	-61.5845	-62.0728	-62.1033	-62.8052							49	-57.7087	-56.9153	-57.8613	-58.2581					49	-51.4832	-51.7883	-51.9104	-51.6968							48.95	0.683014	1.41688	3.78563	-57.6855	-456.122	-835.898	-956.479
49.05	-61.0352	-61.7981	-62.3169	-62.3779	-63.0188							49.05	-57.5256	-57.1594	-57.7087	-58.197					49.05	-51.3916	-51.7273	-51.7883	-51.6357							49	3.12442	2.02724	5.92186	-55.2441	-452.154	-837.729	-955.563
49.1	-61.1267	-61.615	-62.3474	-62.3779	-62.9883							49.1	-57.7698	-57.2205	-57.5561	-57.8613					49.1	-51.6357	-51.8494	-51.4832	-51.6052							49.05	4.03995	-0.719345	5.00633	-57.9907	-456.427	-840.171	-958.615
49.15	-61.3708	-61.5845	-62.3169	-62.2559	-62.9272							49.15	-57.7698	-57.1899	-57.7698	-58.2275					49.15	-51.6052	-51.8799	-51.8494	-51.5137							49.1	3.12442	-2.24522	1.6494	-56.1596	-455.511	-839.56	-960.751
49.2	-61.3098	-61.8286	-62.1338	-62.2864	-63.0188							49.2	-57.7393	-56.8848	-57.8308	-58.136					49.2	-51.6663	-51.6357	-51.8494	-51.3611							49.15	0.072662	-3.46593	2.25975	-51.2768	-451.544	-838.034	-960.141
49.25	-61.3403	-61.676	-62.1643	-62.2253	-63.0493							49.25	-57.5256	-57.1899	-57.6172	-57.8918					49.25	-51.5747	-51.9409	-51.7273	-51.7578							49.2	0.98819	-3.16075	3.17528	-54.9389	-450.323	-835.898	-960.446
49.3	-61.2793	-61.5845	-62.4084	-62.1033	-62.7747							49.3	-57.8308	-57.1594	-57.4951	-58.136					49.3	-51.3916	-51.8799	-51.5747	-51.7273							49.25	0.98819	-2.5504	5.92186	-54.3286	-454.29	-837.119	-957.089
49.35	-61.2183	-61.7676	-62.3474	-62.1338	-63.1409							49.35	-57.7087	-57.0068	-57.8613	-57.9224					49.35	-51.4526	-51.7578	-51.8799	-51.6052							49.3	1.59854	-1.3297	6.83739	-50.6664	-454.901	-839.56	-960.141
49.4	-61.0657	-61.7065	-62.3474	-62.3474	-63.0493							49.4	-57.7393	-56.9153	-57.8308	-58.1055					49.4	-51.6663	-52.0019	-51.8494	-51.5747							49.35	3.12442	-1.02452	4.39598	-54.3286	-450.628	-839.866	-962.583
49.45	-61.2793	-61.4624	-62.1338	-62.3474	-62.7747							49.45	-57.5561	-57.0373	-57.4341	-58.0749					49.45	-51.6052	-51.8799	-51.6052	-51.4832							49.4	4.34512	0.501358	3.48045	-54.6337	-451.544	-841.391	-960.751
49.5	-61.4319	-61.8286	-62.3169	-62.2864	-63.0188							49.5	-57.8308	-57.0984	-57.7698	-57.9529					49.5	-51.6663	-51.7578	-51.7273	-51.5747							49.45	2.51407	1.72206	4.70116	-49.7509	-453.07	-839.866	-955.869
49.55	-61.4014	-61.7065	-62.439	-62.2253	-62.8967							49.55	-57.8003	-56.8237	-57.8308	-58.1665					49.55	-51.4832	-52.0325	-51.7883	-51.7273							49.5	0.377838	0.501358	5.61668	-54.6337	-450.934	-839.866	-957.395
49.6	-61.3403	-61.4624	-62.3779	-62.1033	-63.0493							49.6	-57.7698	-56.9763	-57.7698	-58.0749					49.6	-51.3611	-51.9409	-51.7883	-51.6663							49.55	-1.14804	-0.108994	6.53221	-54.0234	-448.187	-845.359	-957.395
49.65	-61.4319	-61.7676	-62.2864	-62.0117	-62.9883							49.65	-57.4951	-57.0373	-57.4341	-57.7698					49.65	-51.5747	-51.9714	-51.4832	-51.6968							49.6	-0.232513	-1.3297	7.14256	-52.4975	-450.018	-846.885	-954.953
49.7	-61.2488	-61.6455	-62.1948	-62.1948	-62.7441							49.7	-57.8003	-57.0068	-57.8918	-58.1055					49.7	-51.7578	-52.0935	-51.6663	-51.5747							49.65	-1.14804	-1.63487	3.78563	-57.0751	-450.323	-845.664	-952.817
49.75	-61.1267	-61.5234	-62.3779	-62.2864	-63.1714							49.75	-57.7698	-56.8848	-57.7698	-58.1055					49.75	-51.6968	-51.7273	-51.6663	-51.3306							49.7	-0.232513	-2.5504	2.56493	-53.1078	-450.018	-844.748	-955.563
49.8	-61.3098	-61.6455	-62.4695	-62.3169	-62.9883							49.8	-57.7393	-57.0679	-57.7393	-57.8613					49.8	-51.6357	-52.1545	-51.6357	-51.5137							49.75	1.59854	-0.414169	2.8701	-56.1596	-446.051	-841.697	-951.901
49.85	-61.4624	-61.7371	-62.4084	-62.3169	-62.8967							49.85	-57.4646	-57.0373	-57.5867	-57.9834					49.85	-51.5137	-51.9409	-51.4221	-51.7273							49.8	2.81924	-0.719345	3.78563	-55.5493	-447.577	-841.697	-948.85
49.9	-61.4929	-61.6455	-62.2864	-62.2559	-63.0188							49.9	-57.7393	-57.0373	-57.8308	-58.0139					49.9	-51.3611	-51.8494	-51.7273	-51.6968							49.85	1.59854	-0.108994	6.22704	-50.0561	-447.577	-843.528	-952.207
49.95	-61.2793	-61.4929	-62.2253	-62.2253	-62.6831							49.95	-57.7393	-56.9153	-57.7698	-57.9834					49.95	-51.5747	-52.063	-51.6968	-51.5747							49.9	-0.537689	0.196182	5.31151	-55.2441	-445.746	-842.612	-947.934
50	-61.4319	-61.7676	-62.439	-62.1338	-63.1103							50	-57.7698	-57.0984	-57.5867	-57.9224					50	-51.6663	-51.8188	-51.5747	-51.5442							49.95	-1.45322	1.72206	1.95457	-49.7509	-441.168	-839.866	-946.408
50.05	-61.3403	-61.7371	-62.5	-62.0422	-62.9883							50.05	-57.5256	-57.0373	-57.6782	-58.1055					50.05	-51.7883	-52.063	-51.3916	-51.3611							50	-1.14804	2.33241	1.03905	-50.9716	-442.389	-836.814	-948.85
50.1	-61.2488	-61.4624	-62.3474	-62.2253	-62.6526							50.1	-57.7087	-57.0068	-57.8613	-57.9529					50.1	-51.6663	-52.0325	-51.6968	-51.4832							50.05	-0.232513	1.11171	1.6494	-51.2768	-443.609	-831.931	-944.272
50.15	-61.3403	-61.7371	-62.3474	-62.2864	-63.0493							50.15	-57.8308	-56.9458	-57.8003	-57.9224					50.15	-51.5747	-51.7578	-51.6357	-51.5747							50.1	-0.842865	-0.719345	1.03905	-46.6992	-442.083	-826.743	-946.713
50.2	-61.4319	-61.7371	-62.1033	-62.2864	-62.9883							50.2	-57.8308	-57.1594	-57.5561	-58.2275					50.2	-51.3916	-52.0935	-51.5747	-51.6663							50.15	-0.537689	-2.5504	2.25975	-51.2768	-438.116	-826.743	-946.408
50.25	-61.3708	-61.6455	-62.3779	-62.3169	-62.7747							50.25	-57.5561	-57.0679	-57.7087	-58.0444					50.25	-51.5442	-52.0019	-51.3	-51.6052							50.2	0.683014	-3.7711	3.78563	-50.6664	-436.895	-825.217	-942.746
50.3	-61.3403	-61.4929	-62.439	-62.1948	-62.9883							50.3	-57.5561	-57.0679	-57.8003	-57.8613					50.3	-51.7578	-51.8188	-51.6357	-51.6357							50.25	2.20889	-4.68663	1.6494	-48.225	-438.727	-822.165	-946.713
50.35	-61.1877	-61.7676	-62.4084	-61.9812	-62.9883							50.35	-57.7698	-56.9763	-57.7698	-58.0749					50.35	-51.7883	-52.1545	-51.6357	-51.4832							50.3	0.377838	-5.90733	-1.09718	-52.4975	-436.59	-820.639	-945.188
50.4	-61.4319	-61.7981	-62.3779	-62.2559	-62.8052							50.4	-57.7393	-57.2205	-57.5561	-58.0749					50.4	-51.7273	-52.0019	-51.5747	-51.2695							50.35	-0.842865	-4.38145	-2.31789	-50.9716	-432.623	-816.977	-942.441
50.45	-61.4014	-61.554	-62.2253	-62.3474	-63.0188							50.45	-57.6172	-57.1289	-57.7698	-57.9834					50.45	-51.7578	-51.9104	-51.3306	-51.4221							50.4	-1.45322	-4.38145	-1.70754	-50.3613	-430.487	-815.146	-946.713
50.5	-61.2183	-61.615	-62.1338	-62.2559	-62.8967							50.5	-57.4036	-57.1594	-57.8003	-57.7393					50.5	-51.7273	-52.2156	-51.5442	-51.6357							50.45	-0.842865	-4.68663	0.428696	-54.6337	-433.233	-815.146	-943.967
50.55	-61.3708	-61.7981	-62.3779	-62.0117	-62.6526							50.55	-57.6782	-56.9153	-57.8003	-58.136					50.55	-51.5442	-51.9409	-51.6968	-51.6663							50.5	-0.232513	-4.99181	1.03905	-50.0561	-433.233	-816.062	-941.831
50.6	-61.3708	-61.7065	-62.439	-62.2253	-63.0493							50.6	-57.8918	-57.1594	-57.6172	-58.0139					50.6	-51.5442	-51.8188	-51.6357	-51.6052							50.55	0.98819	-4.38145	2.25975	-50.3613	-431.097	-816.367	-944.577
50.65	-61.0352	-61.554	-62.3779	-62.3779	-62.9578							50.65	-57.5867	-57.1594	-57.8308	-57.9529					50.65	-51.7273	-52.124	-51.5442	-51.6052							50.6	3.4296	-4.07628	0.428696	-54.0234	-429.571	-813.315	-940.915
50.7	-61.4624	-61.7371	-62.2559	-62.1643	-62.6526							50.7	-57.5867	-57.251	-57.8918	-57.9224					50.7	-52.0019	-52.0325	-51.3916	-51.5747							50.65	3.73477	-4.07628	-0.792007	-50.9716	-433.233	-811.789	-941.525
50.75	-61.3403	-61.7065	-62.0422	-62.2253	-63.0188							50.75	-57.4951	-57.0068	-57.8613	-58.1665					50.75	-51.7883	-51.8494	-51.6968	-51.5137							50.7	-0.232513	-4.07628	-1.40236	-50.0561	-434.759	-807.212	-942.746
50.8	-61.0046	-61.676	-62.1948	-62.3474	-62.8967							50.8	-57.8308	-57.0984	-57.7087	-58.0139					50.8	-51.7883	-52.1545	-51.5747	-51.3611							50.75	-1.75839	-5.29698	-0.181656	-52.8027	-435.37	-804.77	-941.22
50.85	-61.4014	-61.5234	-62.3474	-62.3169	-62.7441							50.85	-57.7698	-57.2815	-57.9224	-57.8308					50.85	-51.8494	-52.1545	-51.6357	-51.5442							50.8	-0.537689	-4.99181	1.03905	-50.9716	-432.928	-804.16	-943.051
50.9	-61.3098	-61.7065	-62.3779	-62.2253	-62.8967							50.9	-57.7087	-57.1899	-57.9529	-57.9834					50.9	-51.7578	-51.7883	-51.3306	-51.7273							50.85	1.29337	-6.21251	2.56493	-48.8354	-433.844	-806.907	-947.324
50.95	-61.1877	-61.676	-62.2864	-62.2864	-62.8357							50.95	-57.5867	-57.0373	-57.9224	-58.136					50.95	-51.5442	-52.0325	-51.6357	-51.7273							50.9	-0.232513	-7.12804	4.70116	-53.413	-436.895	-807.212	-946.408
51	-61.4014	-61.5845	-62.3169	-62.1948	-62.7747							51	-57.6172	-56.9153	-57.8308	-58.0444					51	-51.6663	-52.124	-51.7883	-51.6968							50.95	-3.89462	-7.73839	3.17528	-50.9716	-436.895	-805.991	-946.103
51.05	-61.1877	-61.6455	-62.1033	-62.3474	-62.8662							51.05	-57.8308	-57.1899	-57.9529	-57.7087					51.05	-51.8188	-51.9714	-51.6968	-51.6357							51	-2.06357	-7.12804	1.95457	-47.0043	-434.759	-805.991	-951.596
51.1	-61.4319	-61.676	-62.1643	-62.4084	-62.9272							51.1	-57.8003	-57.2205	-58.0749	-58.0139					51.1	-51.8799	-51.9104	-51.5137	-51.7273							51.05	1.59854	-6.82286	1.95457	-50.9716	-432.318	-805.686	-950.375
51.15	-61.2793	-61.5845	-62.2253	-62.0728	-62.8662							51.15	-57.7393	-57.0984	-58.0139	-58.0749					51.15	-52.0325	-52.2156	-51.4221	-51.5137							51.1	-1.75839	-7.12804	2.56493	-50.3613	-435.37	-805.076	-947.629
51.2	-61.0657	-61.4624	-62.3169	-62.5	-62.6221							51.2	-57.6782	-56.9458	-57.9834	-58.0444					51.2	-51.8494	-52.1545	-51.7578	-51.4221							51.15	-2.36874	-7.12804	6.22704	-46.394	-439.642	-802.634	-951.596
51.25	-61.4014	-61.676	-62.2559	-62.3474	-62.9272							51.25	-57.6172	-57.0068	-57.8003	-57.6782					51.25	-51.8494	-51.8799	-51.6357	-51.5442							51.2	1.90372	-7.12804	1.95457	-48.225	-439.642	-805.686	-950.681
51.3	-61.0962	-61.676	-62.3779	-62.3474	-62.9272							51.3	-57.8003	-57.2815	-58.1055	-58.0139					51.3	-51.7883	-52.124	-51.6663	-51.7273							51.25	-0.537689	-5.90733	-0.486832	-50.3613	-439.032	-807.822	-947.019
51.35	-61.3403	-61.615	-62.1643	-62.3779	-62.7441							51.35	-57.9224	-57.1594	-58.0749	-58.1055					51.35	-51.8188	-52.0325	-51.4526	-51.7883							51.3	-0.842865	-4.38145	0.428696	-47.9199	-438.421	-807.822	-948.85
51.4	-61.2793	-61.4929	-61.9507	-62.1033	-62.8357							51.4	-57.9224	-57.0068	-58.0444	-57.9224					51.4	-51.6052	-52.0935	-51.5747	-51.6663							51.35	3.4296	-3.7711	4.39598	-44.8681	-443.609	-808.432	-948.85
51.45	-61.1572	-61.676	-62.1643	-62.4695	-62.9578							51.45	-57.6782	-56.9153	-57.7393	-57.7087					51.45	-51.7273	-52.0325	-51.7578	-51.6357							51.4	-0.537689	-2.24522	-0.181656	-49.4457	-444.22	-807.212	-945.188
51.5	-61.3098	-61.676	-62.3474	-62.4084	-62.8967							51.5	-57.5867	-57.1899	-57.9834	-57.9529					51.5	-51.9104	-52.2156	-51.6663	-51.6052							51.45	0.683014	-4.38145	1.03905	-49.1406	-442.389	-805.991	-942.746
51.55	-61.0962	-61.5845	-62.3169	-62.1948	-62.6831							51.55	-57.7698	-57.2205	-58.136	-58.0444					51.55	-52.0325	-52.2156	-51.5442	-51.6968							51.5	4.6503	-6.21251	3.78563	-45.4785	-440.252	-806.907	-945.798
51.6	-61.4014	-61.4014	-62.2253	-62.3169	-63.0188							51.6	-57.9529	-57.0984	-58.1055	-57.9224					51.6	-51.9409	-51.9714	-51.2695	-51.5137							51.55	-0.537689	-6.51769	1.34422	-48.225	-438.727	-811.179	-944.577
51.65	-61.3098	-61.554	-62.2253	-62.2559	-62.9272							51.65	-57.7393	-57.0373	-57.9529	-57.7087					51.65	-51.8799	-52.2461	-51.5747	-51.4221							51.6	1.59854	-4.99181	-0.486832	-50.6664	-441.473	-810.874	-941.525
51.7	-61.0962	-61.6455	-62.1338	-62.5	-62.8662							51.7	-57.8003	-56.9763	-57.8308	-57.8308					51.7	-51.8494	-52.2461	-51.6968	-51.5442							51.65	2.81924	-2.24522	4.0908	-49.7509	-441.473	-809.043	-943.356
51.75	-61.4319	-61.5234	-62.0422	-62.3474	-62.7441							51.75	-57.6172	-57.1899	-58.197	-58.0139					51.75	-51.8188	-52.1851	-51.6357	-51.7273							51.7	0.377838	-2.24522	0.12352	-47.9199	-439.032	-806.296	-946.408
51.8	-61.2183	-61.4014	-62.1033	-62.1033	-63.0493							51.8	-57.7087	-57.1899	-58.1665	-57.9529					51.8	-52.124	-51.9714	-51.4832	-51.6663							51.75	2.51407	-5.60216	0.428696	-51.582	-436.895	-809.043	-944.882
51.85	-61.2793	-61.4319	-62.3474	-62.5	-62.9883							51.85	-57.8308	-57.0679	-58.0749	-57.7698					51.85	-51.9409	-52.2461	-51.3916	-51.6663							51.8	0.072662	-4.99181	3.48045	-50.9716	-432.623	-809.653	-940.61
51.9	-61.3708	-61.7065	-62.3779	-62.3779	-62.7747							51.9	-57.8308	-57.1594	-58.0444	-57.9224					51.9	-52.0935	-52.1545	-51.5137	-51.6357							51.85	-0.537689	-0.719345	-0.792007	-48.5302	-433.233	-807.212	-945.493
51.95	-61.2183	-61.4929	-62.2864	-62.1948	-62.9578							51.95	-57.8308	-56.8848	-58.0444	-58.1665					51.95	-51.7273	-52.0325	-51.7273	-51.5137							51.9	1.90372	-1.3297	3.78563	-47.3095	-432.928	-805.381	-945.798
52	-61.3708	-61.4929	-62.2253	-62.3779	-63.1409							52	-57.8003	-57.0984	-58.3801	-57.9529					52	-52.063	-51.9714	-51.5747	-51.3306							51.95	-3.28427	-3.46593	1.6494	-50.3613	-430.792	-809.043	-942.136
52.05	-61.3098	-61.3098	-62.2253	-62.2253	-62.9883							52.05	-57.5867	-57.1899	-58.2275	-57.8308					52.05	-52.0935	-52.2461	-51.5747	-51.4221							52	-0.537689	-1.02452	1.34422	-48.225	-428.961	-806.907	-938.779
52.1	-61.0962	-61.615	-62.0728	-62.3169	-62.7136							52.1	-57.7698	-57.1289	-58.197	-57.7087					52.1	-51.9409	-52.1545	-51.4221	-51.6357							52.05	0.683014	4.16347	3.48045	-43.9526	-426.825	-804.16	-941.525
52.15	-61.4319	-61.554	-62.0422	-62.4084	-62.9883							52.15	-57.8308	-57.1289	-58.2275	-58.136					52.15	-52.0019	-52.0019	-51.4526	-51.5137							52.1	-2.36874	-1.02452	-0.792007	-47.3095	-425.909	-807.822	-939.694
52.2	-61.2793	-61.4929	-62.1948	-62.2559	-62.9883							52.2	-57.9529	-56.8542	-58.136	-58.0444					52.2	-52.124	-51.8799	-51.6357	-51.3611							52.15	1.29337	-1.02452	3.17528	-48.8354	-428.045	-805.686	-938.474
52.25	-61.0352	-61.3403	-62.3169	-62.3169	-62.9578							52.25	-57.7698	-56.9153	-58.3191	-58.0139					52.25	-52.0935	-52.0935	-51.5747	-51.3611							52.2	-1.45322	2.02724	1.03905	-46.6992	-430.182	-802.939	-934.812
52.3	-61.3403	-61.4929	-62.1948	-62.4695	-62.6526							52.3	-57.8003	-57.2205	-58.3191	-57.7698					52.3	-52.0325	-52.124	-51.4832	-51.5442							52.25	-1.14804	-1.02452	1.95457	-43.9526	-429.266	-805.991	-937.863
52.35	-61.3403	-61.615	-62.2253	-62.3169	-63.0493							52.35	-57.6477	-57.1289	-58.3801	-58.0444					52.35	-52.1545	-51.8799	-51.5137	-51.3916							52.3	3.4296	-1.63487	4.70116	-48.5302	-428.656	-803.244	-936.948
52.4	-61.2183	-61.5234	-62.1033	-62.2253	-62.9883							52.4	-57.7393	-57.0679	-58.2581	-58.0749					52.4	-51.9104	-51.8494	-51.3	-51.2085							52.35	-0.232513	1.41688	1.95457	-48.8354	-427.13	-805.686	-934.201
52.45	-61.2793	-61.4624	-62.0422	-62.4695	-62.9883							52.45	-57.8003	-57.0068	-58.197	-58.0749					52.45	-52.1545	-52.0935	-51.3611	-51.4832							52.4	-1.14804	-1.63487	7.44774	-47.6147	-429.571	-806.907	-931.455
52.5	-61.4319	-61.3708	-62.3169	-62.3169	-62.7136							52.5	-57.8918	-56.8542	-58.2886	-57.9224					52.5	-52.2156	-51.9714	-51.6357	-51.4221							52.45	2.81924	-3.16075	2.8701	-44.5629	-431.402	-803.55	-934.201
52.55	-61.1877	-61.6455	-62.2864	-62.2864	-63.1103							52.55	-57.7698	-57.0373	-58.4106	-57.8613					52.55	-51.8799	-51.8799	-51.4832	-51.2085							52.5	-0.842865	0.196182	4.39598	-49.4457	-432.013	-809.043	-933.591
52.6	-61.2183	-61.5845	-62.1948	-62.4084	-63.1409							52.6	-57.8918	-57.1594	-58.3801	-58.1055					52.6	-52.1545	-51.7578	-51.4832	-51.4221							52.55	-2.06357	-2.24522	6.22704	-48.5302	-431.707	-807.517	-929.929
52.65	-61.3098	-61.7065	-62.1033	-62.4084	-62.9883							52.65	-57.6782	-57.0679	-58.2275	-58.1055					52.65	-52.0935	-52.0325	-51.3611	-51.3916							52.6	2.20889	-3.16075	1.95457	-46.6992	-430.487	-809.043	-926.572
52.7	-61.3403	-61.4624	-62.3474	-62.1948	-62.8052							52.7	-57.5256	-57.1594	-58.136	-58.0444					52.7	-51.9714	-51.9714	-51.2695	-51.0559							52.65	-0.537689	-0.108994	4.39598	-45.4785	-428.045	-810.263	-929.624
52.75	-61.0962	-61.4014	-62.3169	-62.5305	-63.0493							52.75	-57.7087	-56.9458	-58.3496	-58.0139					52.75	-52.1851	-51.9409	-51.3306	-51.5137							52.7	-0.842865	-1.02452	2.8701	-50.6664	-424.688	-805.381	-930.234
52.8	-61.4319	-61.6455	-62.1948	-62.4084	-63.1409							52.8	-57.9529	-56.9458	-58.5022	-57.8308					52.8	-51.9409	-51.7273	-51.5747	-51.3916							52.75	1.29337	-1.3297	1.34422	-50.6664	-427.13	-810.263	-928.098
52.85	-61.3098	-61.676	-62.3779	-62.3169	-63.1409							52.85	-57.8308	-57.1594	-58.3191	-58.136					52.85	-52.063	-52.0325	-51.5137	-51.3							52.8	1.29337	-0.414169	5.92186	-47.6147	-427.435	-807.212	-924.436
52.9	-61.1572	-61.615	-62.3474	-62.3474	-62.8052							52.9	-57.7698	-57.1899	-58.3191	-58.0749					52.9	-52.124	-51.9714	-51.5137	-51.3916							52.85	-1.14804	0.196182	-0.181656	-46.6992	-426.519	-805.991	-927.487
52.95	-61.3708	-61.4624	-62.1948	-62.5	-63.1103							52.95	-57.7393	-57.0373	-58.2581	-58.2275					52.95	-51.8188	-52.0019	-51.4221	-51.3306							52.9	0.98819	-2.85558	-0.181656	-50.9716	-424.078	-806.601	-928.098
53	-61.3403	-61.5234	-62.3169	-62.4695	-63.1103							53	-57.7087	-57.0984	-58.2275	-57.9224					53	-52.1545	-51.6663	-51.239	-51.3611							52.95	4.34512	-1.02452	5.31151	-50.6664	-421.331	-804.16	-926.877
53.05	-61.1877	-61.7981	-62.3779	-62.1338	-63.1409							53.05	-57.4341	-57.0068	-58.3801	-57.9224					53.05	-52.0019	-52.0019	-51.2695	-51.4221							53	-0.842865	0.501358	0.12352	-47.6147	-418.28	-806.907	-921.079
53.1	-61.2793	-61.6455	-62.1033	-62.561	-62.8357							53.1	-57.6782	-56.9458	-58.4717	-58.1665					53.1	-51.9409	-52.0325	-51.5442	-51.1169							53.05	0.072662	-2.5504	0.733871	-44.8681	-420.721	-806.907	-919.858
53.15	-61.3403	-61.676	-62.3474	-62.5	-62.9883							53.15	-57.7393	-56.9763	-58.4717	-58.2275					53.15	-52.0019	-52.0325	-51.4832	-51.5442							53.1	3.4296	-0.719345	3.48045	-47.6147	-422.552	-802.939	-921.689
53.2	-61.2183	-61.4624	-62.3779	-62.3779	-63.2019							53.2	-57.9224	-57.1594	-58.4412	-58.0749					53.2	-51.9104	-51.8188	-51.3	-51.5137							53.15	1.59854	1.72206	0.428696	-48.8354	-421.331	-808.127	-920.468
53.25	-61.0352	-61.5234	-62.1948	-62.3779	-63.1409							53.25	-57.6477	-57.1289	-58.2581	-58.0444					53.25	-52.0325	-51.8494	-51.3916	-51.2695							53.2	-0.537689	1.41688	0.733871	-47.3095	-419.5	-805.076	-916.501
53.3	-61.3403	-61.6455	-62.4084	-62.5915	-62.8967							53.3	-57.6782	-57.1289	-58.1055	-57.8613					53.3	-52.063	-52.0325	-51.3	-51.5442							53.25	0.683014	-1.02452	2.56493	-43.6474	-418.585	-802.939	-912.839
53.35	-61.2793	-61.7065	-62.1643	-62.5305	-62.8357							53.35	-57.6477	-57.1289	-58.4412	-58.197					53.35	-51.6968	-51.9104	-51.178	-51.3306							53.3	4.95547	0.806534	-1.40236	-46.0888	-416.143	-805.991	-916.196
53.4	-60.9436	-61.5845	-62.3779	-62.2559	-63.1409							53.4	-57.5561	-56.9153	-58.4717	-58.197					53.4	-52.063	-51.8799	-51.2085	-51.4526							53.35	-0.537689	3.24794	-0.792007	-48.225	-413.092	-803.55	-917.417
53.45	-61.1877	-61.615	-62.439	-62.5305	-63.1103							53.45	-57.373	-56.8237	-58.3496	-58.136					53.45	-51.9714	-51.6968	-51.3916	-51.4832							53.4	-1.45322	1.41688	2.25975	-48.5302	-413.397	-800.803	-916.501
53.5	-61.2793	-61.4319	-62.1948	-62.439	-63.0493							53.5	-57.5867	-57.0068	-58.3496	-58.136					53.5	-51.7273	-52.0019	-51.4832	-51.3							53.45	2.20889	-1.3297	-2.01271	-45.7836	-414.923	-802.939	-913.754
53.55	-61.2793	-61.615	-62.4084	-62.3474	-62.8357							53.55	-57.6782	-57.0984	-58.2886	-58.1055					53.55	-52.063	-51.9409	-51.3306	-51.4832							53.5	2.20889	-0.108994	-0.792007	-45.1733	-414.312	-799.888	-913.754
53.6	-60.9741	-61.7065	-62.2253	-62.3169	-62.9578							53.6	-57.7087	-57.1289	-58.1665	-58.0139					53.6	-52.063	-51.9714	-51.3916	-51.5747							53.55	-1.75839	2.33241	3.17528	-49.7509	-413.702	-797.141	-917.111
53.65	-61.3403	-61.615	-62.5	-62.439	-63.1409							53.65	-57.6172	-57.0068	-58.197	-58.3801					53.65	-51.7578	-51.8799	-51.1475	-51.2695							53.6	-0.537689	-0.414169	0.12352	-50.0561	-414.007	-799.277	-916.501
53.7	-61.3403	-61.676	-62.5	-62.4695	-62.9883							53.7	-57.5256	-57.0679	-58.3801	-58.2581					53.7	-52.063	-51.7273	-51.1475	-51.4221							53.65	2.51407	-2.85558	1.03905	-48.8354	-413.702	-795.92	-914.06
53.75	-61.1572	-61.4014	-62.1033	-62.2559	-62.9578							53.75	-57.5256	-56.9153	-58.4412	-58.2581					53.75	-52.0935	-51.8494	-51.0559	-51.4832							53.7	0.072662	-2.5504	4.0908	-45.4785	-413.397	-790.732	-911.008
53.8	-61.0657	-61.4929	-62.4695	-62.4695	-62.7747							53.8	-57.4951	-56.7627	-58.3496	-58.0749					53.8	-51.9409	-51.9104	-51.3	-51.4221							53.75	-0.537689	1.41688	1.6494	-47.9199	-414.007	-792.868	-913.449
53.85	-61.3403	-61.7371	-62.2864	-62.5305	-62.9578							53.85	-57.312	-56.8237	-58.2886	-58.0444					53.85	-51.9714	-51.9104	-51.2695	-51.3306							53.8	2.20889	0.196182	0.428696	-49.7509	-415.838	-790.732	-914.365
53.9	-61.2793	-61.7676	-62.3169	-62.4695	-63.1409							53.9	-57.4341	-57.0679	-58.197	-58.136					53.9	-52.0935	-51.7578	-51.3	-51.4221							53.85	4.6503	-2.85558	3.17528	-48.8354	-418.585	-787.68	-914.365
53.95	-61.0046	-61.615	-62.3779	-62.1643	-63.0188							53.95	-57.5256	-57.0068	-58.136	-58.3801					53.95	-52.0935	-51.5137	-51.239	-51.3306							53.9	0.377838	-2.24522	1.95457	-47.3095	-417.669	-791.037	-913.449
54	-61.1877	-61.6455	-62.2253	-62.5915	-62.9272							54	-57.5867	-56.9153	-58.197	-58.3191					54	-51.8188	-51.7883	-51.3	-51.2085							53.95	1.29337	-1.3297	-1.40236	-44.5629	-415.228	-791.648	-911.618
54.05	-61.3098	-61.554	-62.3779	-62.5	-62.7441							54.05	-57.4646	-56.9153	-58.3191	-58.2275					54.05	-52.1545	-51.9104	-51.1169	-51.5137							54	3.73477	0.501358	0.12352	-48.225	-413.397	-789.817	-913.144
54.1	-61.1877	-61.615	-62.3169	-62.561	-63.0493							54.1	-57.373	-56.9763	-58.3801	-58.1665					54.1	-52.0325	-51.8188	-50.9338	-51.3916							54.05	4.95547	-4.38145	1.95457	-47.6147	-409.735	-790.732	-914.67
54.15	-61.0657	-61.676	-62.1643	-62.1948	-63.0798							54.15	-57.312	-56.8542	-58.3496	-58.1055					54.15	-51.9104	-51.6968	-51.0864	-51.178							54.1	0.377838	-3.16075	-2.92824	-47.9199	-411.566	-792.258	-913.144
54.2	-61.2183	-61.7676	-62.3169	-62.561	-62.9883							54.2	-57.5867	-56.7322	-58.2886	-58.197					54.2	-52.1851	-51.4832	-51.1475	-51.4526							54.15	0.683014	-3.16075	-2.31789	-45.7836	-411.566	-789.512	-911.313
54.25	-61.2183	-61.6455	-62.3474	-62.4695	-62.9883							54.25	-57.4036	-56.7017	-58.2275	-58.4106					54.25	-52.124	-51.7883	-51.3	-51.5442							54.2	2.81924	1.11171	1.03905	-43.3422	-409.43	-786.46	-907.346
54.3	-61.1267	-61.7065	-62.0422	-62.5	-62.6831							54.3	-57.4036	-57.0068	-58.0444	-58.3191					54.3	-51.9714	-51.7578	-51.2085	-51.3306							54.25	4.34512	-2.24522	-1.70754	-45.7836	-408.209	-788.596	-905.515
54.35	-60.9741	-61.4624	-62.3779	-62.1643	-62.9272							54.35	-57.1899	-57.0068	-58.136	-58.3191					54.35	-51.9104	-51.7578	-51.2695	-51.3							54.3	1.29337	-4.38145	-3.84376	-47.3095	-407.293	-785.544	-907.651
54.4	-61.3098	-61.4624	-62.2253	-62.4695	-63.0798							54.4	-57.5256	-56.9153	-58.136	-58.2886					54.4	-52.2766	-51.6968	-51.1169	-51.6052							54.35	1.59854	-3.16075	-1.40236	-47.0043	-410.65	-780.051	-907.651
54.45	-61.0657	-61.676	-62.1338	-62.5	-62.9272							54.45	-57.4646	-56.8848	-58.2581	-58.2275					54.45	-52.124	-51.5137	-50.9033	-51.4526							54.4	4.95547	-0.108994	0.733871	-45.4785	-408.819	-780.967	-907.651
54.5	-61.1267	-61.7676	-62.2864	-62.4084	-62.8967							54.5	-57.1899	-56.8848	-58.197	-58.197					54.5	-51.9104	-51.5747	-51.0559	-51.2085							54.45	5.26065	0.501358	-2.62306	-44.5629	-404.547	-781.577	-904.904
54.55	-60.9436	-61.6455	-62.2864	-62.2253	-62.7747							54.55	-57.4646	-56.7017	-58.1665	-58.4717					54.55	-52.0935	-51.8799	-51.2695	-51.5137							54.5	1.90372	-2.85558	-1.70754	-46.0888	-407.904	-776.694	-903.073
54.6	-61.2488	-61.615	-62.1033	-62.439	-62.8357							54.6	-57.5256	-56.7322	-58.136	-58.4412					54.6	-52.2156	-51.7578	-51.2085	-51.5442							54.55	2.20889	-2.5504	1.34422	-48.8354	-406.988	-773.948	-907.041
54.65	-61.1572	-61.615	-62.2253	-62.5305	-63.0188							54.65	-57.1899	-56.8848	-58.0749	-58.3496					54.65	-52.0019	-51.7273	-51.0559	-51.4221							54.6	3.73477	-2.85558	0.733871	-47.3095	-403.021	-776.999	-909.177
54.7	-61.0657	-61.5845	-62.2864	-62.439	-62.9883							54.7	-57.5256	-56.9458	-57.9529	-58.2581					54.7	-51.8188	-51.6663	-50.9949	-51.2695							54.65	4.95547	-1.02452	-1.09718	-46.6992	-405.157	-775.168	-910.092
54.75	-60.9436	-61.4319	-62.2559	-62.1948	-62.9578							54.75	-57.373	-56.7627	-57.8613	-58.2886					54.75	-52.1851	-51.5442	-51.3306	-51.6052							54.7	0.377838	-0.414169	1.34422	-43.037	-404.852	-768.454	-907.041
54.8	-61.2488	-61.615	-62.0728	-62.3474	-62.8357							54.8	-57.1594	-56.7017	-57.9834	-58.136					54.8	-52.0935	-51.7273	-51.239	-51.6052							54.75	0.683014	-2.24522	4.0908	-44.2578	-399.359	-769.37	-906.125
54.85	-61.1572	-61.7065	-62.3474	-62.439	-62.8052							54.85	-57.4646	-56.9763	-58.136	-58.1665					54.85	-51.9409	-51.8188	-50.9644	-51.3611							54.8	1.29337	-2.24522	-0.181656	-47.3095	-403.631	-768.76	-906.735
54.9	-61.0657	-61.615	-62.2559	-62.439	-62.9272							54.9	-57.3425	-56.9763	-58.0749	-58.2886					54.9	-51.8188	-51.8494	-51.2085	-51.3611							54.85	3.73477	-1.3297	1.03905	-47.6147	-399.054	-765.708	-908.872
54.95	-60.9436	-61.6455	-62.0117	-62.2864	-63.1103							54.95	-57.3425	-56.7627	-57.9834	-58.4717					54.95	-52.063	-51.7578	-51.239	-51.6052							54.9	1.59854	0.806534	4.70116	-46.6992	-396.917	-760.825	-907.346
55	-61.2488	-61.4624	-62.3779	-62.1948	-63.0493							55	-57.4341	-56.8237	-57.9529	-58.3496					55	-51.9714	-51.6968	-51.0559	-51.5747							54.95	0.98819	1.11171	3.78563	-43.9526	-397.528	-764.792	-905.82
55.05	-61.2183	-61.4319	-62.2559	-62.439	-63.0493							55.05	-57.1899	-56.9763	-57.7393	-58.3801					55.05	-51.8799	-51.4832	-51.2085	-51.3306							55	1.90372	-1.63487	0.428696	-43.9526	-390.814	-765.708	-904.294
55.1	-61.0962	-61.6455	-62.1033	-62.4695	-62.8357							55.1	-57.4951	-56.9763	-57.9834	-58.2581					55.1	-51.8799	-51.8494	-51.178	-51.5137							55.05	5.56583	-2.24522	1.03905	-46.394	-394.171	-764.182	-900.632
55.15	-60.9741	-61.554	-62.1338	-62.3779	-62.7441							55.15	-57.4341	-56.8237	-58.0444	-58.2275					55.15	-52.0325	-51.8799	-50.8728	-51.6052							55.1	5.26065	-1.94005	3.78563	-48.5302	-392.34	-764.487	-900.937
55.2	-61.1267	-61.5845	-62.2864	-62.1643	-62.9578							55.2	-57.1594	-57.0373	-57.9529	-58.0749					55.2	-51.9409	-51.7883	-51.2695	-51.6052							55.15	1.90372	-0.719345	1.95457	-49.4457	-387.152	-768.76	-902.463
55.25	-61.2793	-61.3098	-62.2253	-62.4084	-63.1103							55.25	-57.4341	-56.8237	-57.7087	-58.197					55.25	-51.7578	-51.8188	-51.1475	-51.4832							55.2	3.12442	1.72206	0.12352	-49.7509	-389.898	-768.76	-903.073
55.3	-61.2183	-61.5845	-62.1033	-62.439	-62.9883							55.3	-57.312	-56.9763	-57.9529	-58.2581					55.3	-51.7883	-51.7578	-50.9338	-51.5442							55.25	4.6503	-1.3297	1.03905	-47.9199	-385.626	-767.539	-900.327
55.35	-61.1267	-61.554	-62.3779	-62.3779	-62.9578							55.35	-57.373	-56.9153	-57.9529	-58.3801					55.35	-51.9104	-51.5442	-51.2085	-51.6663							55.3	6.78653	-3.46593	3.48045	-47.6147	-386.541	-767.539	-898.19
55.4	-61.0352	-61.4014	-62.3169	-62.1643	-62.7747							55.4	-57.4341	-56.6711	-57.7087	-58.3191					55.4	-51.8799	-51.6968	-51.0864	-51.6052							55.35	4.03995	-2.24522	-0.486832	-49.4457	-385.016	-770.896	-895.749
55.45	-61.3098	-61.3403	-62.0117	-62.1948	-62.8052							55.45	-57.1594	-57.0068	-57.8918	-58.2275					55.45	-51.6052	-51.8799	-51.0864	-51.4526							55.4	1.59854	-0.414169	-2.01271	-53.1078	-378.912	-768.76	-895.139
55.5	-61.1572	-61.5845	-62.2864	-62.4695	-62.8052							55.5	-57.5256	-57.0679	-57.8918	-58.2275					55.5	-51.7883	-51.8799	-51.1475	-51.4832							55.45	2.20889	2.02724	0.428696	-53.1078	-381.048	-766.318	-896.97
55.55	-61.2183	-61.4929	-62.3474	-62.2864	-63.0493							55.55	-57.4341	-56.7627	-57.7698	-58.1055					55.55	-51.8188	-51.9104	-50.9033	-51.6663							55.5	3.12442	0.196182	3.17528	-52.4975	-377.386	-767.234	-898.19
55.6	-60.9741	-61.3708	-62.2253	-62.2559	-62.9883							55.6	-57.2205	-57.0068	-57.7393	-58.0139					55.6	-51.8188	-51.8188	-51.2085	-51.6357							55.55	4.34512	-1.3297	-1.70754	-50.3613	-376.165	-769.675	-897.58
55.65	-61.1877	-61.4624	-62.0422	-62.0117	-63.0188							55.65	-57.5561	-56.8237	-57.8308	-57.9529					55.65	-51.6052	-51.8494	-51.0254	-51.4526							55.6	0.683014	-1.3297	-2.31789	-48.225	-378.607	-768.149	-896.97
55.7	-61.3098	-61.3098	-62.3779	-62.3169	-63.0188							55.7	-57.4341	-57.0679	-57.5561	-58.0749					55.7	-51.7883	-51.6968	-50.9644	-51.3306							55.65	0.072662	-0.719345	-0.181656	-50.9716	-375.25	-766.013	-896.665
55.75	-61.2488	-61.4929	-62.3169	-62.439	-62.7747							55.75	-57.2815	-56.9763	-57.9529	-58.2886					55.75	-51.8494	-51.8188	-51.0864	-51.5747							55.7	0.072662	0.196182	3.78563	-52.1923	-378.302	-766.013	-893.918
55.8	-61.1267	-61.5234	-62.1643	-62.3169	-62.7136							55.8	-57.6172	-56.7627	-57.8613	-58.2886					55.8	-51.8799	-51.9409	-50.8118	-51.5747							55.75	2.20889	1.72206	1.03905	-52.4975	-381.048	-767.539	-893.002
55.85	-60.9436	-61.1267	-62.1643	-62.1338	-63.0188							55.85	-57.4951	-57.0679	-57.4951	-58.1665					55.85	-51.6052	-51.9104	-51.2085	-51.4832							55.8	4.6503	0.196182	0.12352	-50.6664	-377.386	-765.708	-895.444
55.9	-61.2183	-61.5234	-62.439	-62.0117	-63.0493							55.9	-57.251	-57.0068	-57.9224	-58.0749					55.9	-51.6663	-51.8188	-51.0864	-51.3916							55.85	0.98819	-2.85558	1.95457	-49.7509	-384.1	-762.351	-896.97
55.95	-61.4014	-61.3403	-62.3169	-62.2864	-62.9883							55.95	-57.5867	-56.8542	-57.8308	-58.1665					55.95	-51.8188	-51.8799	-50.8423	-51.5137							55.9	-0.537689	-2.85558	6.53221	-47.3095	-384.71	-762.961	-896.97
56	-61.2793	-61.4624	-62.1338	-62.4084	-62.9272							56	-57.5561	-57.0068	-57.7698	-58.136					56	-51.7883	-51.6968	-51.1475	-51.4832							55.95	-0.232513	-2.85558	5.00633	-46.394	-382.879	-763.877	-896.054
56.05	-61.1572	-61.4624	-62.2864	-62.2253	-63.0188							56.05	-57.251	-56.7627	-57.7698	-57.9834					56.05	-51.7273	-51.4832	-51.0559	-51.4526							56	3.12442	-0.108994	2.8701	-48.225	-387.762	-762.351	-894.528
56.1	-61.0657	-61.2183	-62.439	-62.1033	-62.9578							56.1	-57.6172	-57.0984	-57.5867	-57.8308					56.1	-51.4832	-51.6357	-50.9949	-51.2695							56.05	3.4296	1.72206	4.0908	-50.3613	-387.457	-759.604	-892.392
56.15	-61.4014	-61.5234	-62.3779	-62.1033	-62.7441							56.15	-57.5256	-57.0068	-57.9224	-57.9834					56.15	-51.8494	-51.8494	-51.2085	-51.4526							56.1	0.683014	1.41688	6.53221	-50.3613	-383.49	-757.163	-890.561
56.2	-61.3098	-61.2793	-62.0422	-62.2864	-62.8357							56.2	-57.3425	-56.6711	-57.7393	-58.0444					56.2	-51.8494	-52.0019	-51.1475	-51.4832							56.15	-1.14804	-0.414169	7.14256	-49.4457	-388.678	-758.384	-890.866
56.25	-61.2488	-61.4319	-62.3169	-62.2864	-63.0188							56.25	-57.6782	-57.0373	-57.5561	-58.136					56.25	-51.7883	-51.8494	-51.0254	-51.4221							56.2	0.98819	-1.63487	1.95457	-48.225	-387.457	-755.637	-892.392
56.3	-61.1877	-61.5234	-62.4084	-62.2559	-63.0798							56.3	-57.5561	-57.0984	-57.8308	-58.0749					56.3	-51.4526	-51.7883	-51.2085	-51.2695							56.25	2.51407	0.501358	3.48045	-47.3095	-383.795	-751.67	-893.918
56.35	-61.0657	-61.2183	-62.4084	-62.1033	-62.8662							56.35	-57.4341	-56.6711	-57.8003	-58.0749					56.35	-51.6357	-51.7883	-51.0559	-51.3							56.3	4.34512	1.41688	4.0908	-45.1733	-386.541	-747.397	-893.002
56.4	-61.3403	-61.554	-61.9812	-62.0728	-62.9883							56.4	-57.4341	-57.0373	-57.7698	-57.9834					56.4	-51.8799	-51.7578	-51.0864	-51.4832							56.35	3.12442	2.63759	5.61668	-47.0043	-386.541	-748.923	-892.392
56.45	-61.4014	-61.1877	-62.3779	-62.1033	-62.8662							56.45	-57.6477	-56.9458	-57.7698	-57.6477					56.45	-51.8188	-51.6052	-51.3	-51.3611							56.4	-0.537689	3.24794	0.733871	-49.7509	-384.1	-748.618	-891.782
56.5	-61.3098	-61.5845	-62.3779	-62.2559	-62.8662							56.5	-57.5867	-56.7627	-57.5561	-58.0444					56.5	-51.5747	-51.6357	-51.2085	-51.3916							56.45	1.29337	-0.108994	0.12352	-50.6664	-382.879	-745.566	-891.477
56.55	-61.3098	-61.4624	-62.3779	-62.2864	-62.7441							56.55	-57.251	-57.0984	-57.9224	-58.136					56.55	-51.4221	-51.7578	-51.0559	-51.0864							56.5	1.90372	-1.3297	1.6494	-49.7509	-384.405	-742.514	-891.171
56.6	-61.1267	-61.2488	-61.9507	-62.2864	-62.8052							56.6	-57.6782	-56.9153	-57.8308	-58.0444					56.6	-51.7883	-51.8188	-51.4221	-51.239							56.55	3.73477	-2.24522	3.48045	-48.8354	-382.269	-742.514	-893.002
56.65	-61.2183	-61.5234	-62.4084	-62.1338	-62.9883							56.65	-57.5867	-56.8542	-57.6172	-57.7393					56.65	-51.8188	-51.8188	-51.2695	-51.4526							56.6	4.34512	-1.94005	3.48045	-48.5302	-379.522	-744.956	-896.054
56.7	-61.4319	-61.4624	-62.3474	-61.9812	-63.0493							56.7	-57.4646	-57.0984	-57.8613	-57.9834					56.7	-51.6663	-51.7273	-50.9338	-51.3306							56.65	0.683014	-0.719345	0.12352	-48.225	-382.879	-742.82	-899.106
56.75	-61.3098	-61.4014	-62.3779	-62.1948	-62.9578							56.75	-57.4951	-57.0068	-57.8613	-57.9529					56.75	-51.5747	-51.8188	-51.3916	-51.2085							56.7	-0.232513	1.72206	0.733871	-46.0888	-381.048	-742.514	-899.716
56.8	-61.3403	-61.4929	-62.0728	-62.3779	-62.9272							56.8	-57.7087	-56.9153	-57.5561	-57.8308					56.8	-51.5747	-51.7273	-51.3	-50.9644							56.75	0.072662	1.11171	2.56493	-47.9199	-377.386	-738.242	-897.275
56.85	-61.1572	-61.3403	-62.2864	-62.2253	-62.8662							56.85	-57.5867	-56.8542	-57.9529	-57.8003					56.85	-51.7578	-51.6052	-51.1475	-51.3916							56.8	0.683014	-0.414169	5.92186	-50.0561	-380.743	-740.989	-897.275
56.9	-61.0046	-61.615	-62.4695	-62.2253	-62.7136							56.9	-57.312	-57.1289	-57.8003	-57.9224					56.9	-51.6968	-51.4221	-51.2085	-51.3916							56.85	2.81924	-1.94005	4.0908	-51.2768	-380.438	-742.209	-896.359
56.95	-61.4014	-61.554	-62.439	-62.2253	-62.8662							56.95	-57.5561	-57.0068	-57.6782	-57.8308					56.95	-51.7273	-51.6968	-51.2695	-51.3916							56.9	3.12442	-2.85558	1.6494	-50.9716	-376.776	-741.904	-895.444
57	-61.4014	-61.2488	-62.1643	-62.0728	-63.0188							57	-57.5561	-56.8237	-57.9224	-57.6477					57	-51.4832	-51.7883	-51.3	-51.2085							56.95	-0.842865	-2.24522	2.25975	-50.6664	-375.86	-740.378	-893.613
57.05	-61.2488	-61.615	-62.2864	-62.1643	-62.9272							57.05	-57.5256	-57.0984	-57.8003	-57.8308					57.05	-51.4221	-51.6663	-51.2085	-51.1475							57	-2.36874	-2.24522	4.39598	-48.5302	-377.691	-738.547	-893.613
57.1	-61.2183	-61.5845	-62.5	-62.2864	-62.8967							57.1	-57.373	-57.0679	-57.7698	-57.6477					57.1	-51.7883	-51.6663	-51.4221	-51.3611							57.05	-1.45322	-0.108994	5.61668	-47.3095	-375.86	-743.43	-896.054
57.15	-61.0046	-61.2488	-62.439	-62.3169	-62.7136							57.15	-57.6477	-56.8848	-57.9529	-57.6477					57.15	-51.6052	-51.6052	-51.3916	-51.4221							57.1	-0.537689	0.501358	3.17528	-50.6664	-371.588	-745.871	-896.97
57.2	-61.1877	-61.615	-62.2253	-62.2864	-62.9883							57.2	-57.5561	-57.0984	-57.8613	-57.7087					57.2	-51.6357	-51.5442	-51.2085	-51.3							57.15	0.377838	-0.108994	1.95457	-51.8871	-374.64	-746.787	-898.19
57.25	-61.2793	-61.5845	-62.1643	-62.1948	-62.8967							57.25	-57.4951	-56.9763	-57.8613	-57.5867					57.25	-51.5137	-51.8188	-51.4526	-51.2695							57.2	2.81924	-2.5504	1.03905	-50.6664	-374.945	-744.956	-897.275
57.3	-61.2793	-61.1877	-62.439	-62.0422	-62.7747							57.3	-57.4646	-57.0679	-57.8003	-57.6477					57.3	-51.4526	-51.7273	-51.3916	-51.178							57.25	1.29337	-2.5504	3.17528	-46.0888	-370.672	-744.956	-894.528
57.35	-61.2183	-61.676	-62.4084	-62.2253	-62.8357							57.35	-57.6172	-56.8848	-58.1055	-57.6782					57.35	-51.7273	-51.6357	-51.3	-51.178							57.3	-0.537689	-3.16075	5.31151	-49.4457	-370.367	-750.754	-893.002
57.4	-61.3098	-61.4624	-62.3169	-62.3779	-62.9272							57.4	-57.5867	-57.0984	-57.9834	-57.373					57.4	-51.7273	-51.5747	-51.2085	-51.3611							57.35	-0.537689	-1.3297	4.0908	-50.9716	-374.029	-752.585	-891.171
57.45	-61.0352	-61.2488	-62.0728	-62.3169	-62.7747							57.45	-57.5256	-57.0068	-57.7393	-57.7087					57.45	-51.6968	-51.6968	-51.5137	-51.3							57.4	0.072662	-0.719345	2.56493	-50.0561	-374.334	-752.89	-888.425
57.5	-61.0352	-61.5234	-62.3779	-62.3169	-62.7441							57.5	-57.5561	-56.8237	-58.0139	-57.6172					57.5	-51.6663	-51.5747	-51.3916	-51.3611							57.45	1.29337	0.196182	3.78563	-46.6992	-370.062	-750.754	-890.256
57.55	-61.1877	-61.4929	-62.4084	-62.4084	-63.0188							57.55	-57.6172	-57.0068	-58.0444	-57.4036					57.55	-51.4221	-51.4526	-51.239	-51.1475							57.5	4.34512	2.33241	4.0908	-52.4975	-372.503	-749.534	-891.782
57.6	-61.3403	-61.2183	-62.3779	-62.2253	-62.7441							57.6	-57.6477	-57.0679	-57.8613	-57.6782					57.6	-51.6052	-51.8188	-51.3611	-51.0254							57.55	4.34512	2.94276	6.53221	-50.6664	-374.945	-751.365	-889.646
57.65	-61.2488	-61.4624	-62.2253	-62.0422	-62.8357							57.65	-57.312	-57.0679	-57.9224	-57.4646					57.65	-51.9104	-51.6663	-51.5137	-51.3306							57.6	1.29337	0.501358	6.53221	-46.0888	-374.029	-753.196	-886.594
57.7	-61.2488	-61.4624	-62.2559	-62.2864	-62.9272							57.7	-57.6172	-56.8237	-58.0749	-57.5256					57.7	-51.6968	-51.3611	-51.4832	-51.3916							57.65	-0.232513	-1.3297	1.95457	-48.5302	-371.283	-751.67	-885.068
57.75	-61.1267	-61.4014	-62.3779	-62.4084	-62.6831							57.75	-57.6782	-57.1594	-58.0749	-57.5561					57.75	-51.7273	-51.7883	-51.0559	-51.239							57.7	0.072662	-1.63487	1.95457	-48.225	-373.724	-748.313	-889.035
57.8	-60.9436	-61.3403	-62.4695	-62.4695	-62.9578							57.8	-57.5256	-57.0984	-57.7698	-57.4341					57.8	-51.6052	-51.7273	-51.4526	-51.1475							57.75	0.683014	-1.94005	2.25975	-43.6474	-373.419	-745.871	-888.12
57.85	-61.0046	-61.4624	-62.3474	-62.2559	-62.8662							57.85	-57.4036	-56.9763	-58.1055	-57.5256					57.85	-51.5747	-51.3916	-51.4526	-50.9949							57.8	1.59854	-2.24522	4.0908	-46.6992	-370.367	-747.702	-885.983
57.9	-61.1877	-61.4014	-62.3169	-62.3779	-62.6831							57.9	-57.6172	-56.9763	-58.0139	-57.5561					57.9	-51.8188	-51.6968	-51.4526	-51.0559							57.85	2.51407	-2.5504	5.31151	-45.4785	-367.926	-750.144	-885.373
57.95	-61.3098	-61.3403	-62.3169	-62.2559	-62.8662							57.95	-57.6782	-57.1594	-57.9529	-57.373					57.95	-51.8799	-51.5442	-51.1475	-51.3							57.9	3.12442	-2.24522	3.48045	-42.4267	-369.452	-749.228	-889.951
58	-61.2488	-61.4929	-62.5	-62.1643	-62.7441							58	-57.5867	-57.0679	-57.8918	-57.6172					58	-51.6968	-51.5747	-51.4526	-51.239							57.95	3.12442	-1.02452	1.95457	-45.7836	-365.789	-749.534	-889.035
58.05	-61.2183	-61.3708	-62.4084	-62.2253	-62.8357							58.05	-57.4646	-56.9153	-58.1665	-57.4951					58.05	-51.7883	-51.6663	-51.4832	-51.239							58	0.377838	-1.94005	1.95457	-40.9008	-361.517	-747.702	-885.983
58.1	-61.0657	-61.1877	-62.3779	-62.3474	-62.9578							58.1	-57.5867	-56.9763	-58.136	-57.3425					58.1	-51.6052	-51.3	-51.3306	-51.2085							58.05	0.98819	-1.3297	2.56493	-42.1215	-359.076	-746.482	-891.171
58.15	-60.9131	-61.4929	-62.2559	-62.4695	-62.6221							58.15	-57.8003	-57.251	-57.9529	-57.4951					58.15	-51.5137	-51.6968	-51.3	-50.9644							58.1	2.51407	-2.5504	4.0908	-41.206	-360.907	-749.228	-891.171
58.2	-61.0046	-61.4014	-62.2253	-62.4084	-62.8967							58.2	-57.6782	-57.0679	-58.0444	-57.5256					58.2	-51.8188	-51.5747	-51.5442	-50.9338							58.15	2.20889	-6.21251	7.44774	-36.6284	-357.55	-751.67	-887.814
58.25	-61.2488	-61.3098	-62.5	-62.3474	-62.7136							58.25	-57.5561	-56.8542	-58.136	-57.3425					58.25	-51.8799	-51.3306	-51.5442	-51.178							58.2	2.20889	-8.34874	5.00633	-41.5112	-354.498	-749.228	-891.782
58.3	-61.2488	-61.3708	-62.439	-62.3474	-62.9272							58.3	-57.5561	-57.0373	-58.0444	-57.312					58.3	-51.8188	-51.6357	-51.3306	-51.3306							58.25	4.34512	-8.34874	3.48045	-38.4594	-352.057	-746.482	-889.035
58.35	-61.1572	-61.4319	-62.439	-62.2864	-62.8357							58.35	-57.7087	-57.1594	-57.8308	-57.4951					58.35	-51.7883	-51.4221	-51.2695	-51.178							58.3	5.871	-7.12804	3.17528	-38.4594	-355.414	-743.735	-885.068
58.4	-61.1877	-61.4319	-62.3474	-62.1643	-62.6221							58.4	-57.6782	-57.0679	-58.136	-57.4341					58.4	-51.6357	-51.5747	-51.5137	-51.1475							58.35	4.03995	-6.82286	4.70116	-40.9008	-352.972	-741.904	-889.34
58.45	-61.1267	-61.1877	-62.2864	-62.2559	-62.9272							58.45	-57.6477	-56.8237	-58.1055	-57.2205					58.45	-51.6052	-51.5442	-51.5442	-51.0559							58.4	1.59854	-7.12804	7.14256	-36.6284	-348.7	-742.82	-884.763
58.5	-60.8826	-61.4929	-62.5	-62.4695	-62.9578							58.5	-57.4646	-57.0068	-57.9224	-57.5256					58.5	-51.7883	-51.2085	-51.3611	-50.9949							58.45	0.683014	-7.12804	8.05809	-39.3749	-347.479	-742.209	-882.016
58.55	-61.2488	-61.3708	-62.5915	-62.4084	-62.6831							58.55	-57.7698	-57.1594	-57.8613	-57.373					58.55	-51.8494	-51.4832	-51.2085	-50.9949							58.5	1.90372	-4.38145	6.53221	-38.7646	-349.615	-740.989	-883.847
58.6	-61.2488	-61.2183	-62.4084	-62.439	-62.9272							58.6	-57.7087	-57.1289	-58.136	-57.2205					58.6	-51.7273	-51.6052	-51.5747	-51.2695							58.55	2.20889	-4.07628	2.8701	-35.4077	-348.7	-739.158	-879.575
58.65	-61.2488	-61.2793	-62.4695	-62.2864	-62.8357							58.65	-57.6782	-56.9763	-58.1055	-57.4036					58.65	-51.8188	-51.3	-51.5137	-51.239							58.6	2.20889	-3.46593	4.0908	-39.9853	-345.953	-737.326	-881.406
58.7	-61.0046	-61.3708	-62.3169	-62.1338	-62.7136							58.7	-57.4036	-57.0373	-58.0139	-57.4951					58.7	-51.7578	-51.6052	-51.4221	-51.3							58.65	2.51407	-3.16075	4.0908	-37.5439	-344.732	-732.138	-882.626
58.75	-61.2183	-61.2793	-62.5305	-62.3779	-62.9883							58.75	-57.6477	-57.251	-57.8613	-57.3425					58.75	-51.5747	-51.5747	-51.1475	-51.1475							58.7	4.6503	-4.38145	5.92186	-35.7128	-347.784	-731.223	-875.302
58.8	-61.1877	-61.1267	-62.561	-62.3779	-62.8052							58.8	-57.6477	-57.0984	-58.1665	-57.251					58.8	-51.5137	-51.3306	-51.4832	-51.0864							58.75	5.56583	-5.29698	6.83739	-39.6801	-348.089	-733.359	-880.795
58.85	-61.1572	-61.3708	-62.5305	-62.3779	-62.6526							58.85	-57.6172	-56.9763	-58.0749	-57.5256					58.85	-51.7883	-51.6357	-51.5442	-50.8728							58.8	2.81924	-6.51769	8.05809	-35.7128	-347.479	-733.97	-879.575
58.9	-61.1572	-61.3708	-62.5	-61.9507	-62.9272							58.9	-57.4646	-56.9153	-58.0444	-57.4341					58.9	-51.7883	-51.6052	-51.5747	-51.1169							58.85	0.683014	-7.73839	7.14256	-34.4921	-344.732	-733.97	-876.523
58.95	-61.2488	-61.2183	-62.4695	-62.439	-62.9578							58.95	-57.251	-57.2205	-57.8613	-57.312					58.95	-51.7578	-51.2085	-51.239	-51.2085							58.9	-1.45322	-8.04356	4.0908	-36.6284	-347.479	-731.833	-881.711
59	-61.1572	-61.2183	-62.3169	-62.3474	-62.5305							59	-57.5867	-57.0373	-58.1665	-57.4646					59	-51.6968	-51.6968	-51.3916	-51.2085							58.95	-0.842865	-8.04356	4.0908	-35.1025	-349.31	-730.002	-881.406
59.05	-61.1267	-61.4319	-62.561	-62.1643	-62.9578							59.05	-57.5561	-56.9763	-58.1055	-57.4951					59.05	-51.6663	-51.4832	-51.5747	-51.1475							59	0.98819	-5.60216	4.0908	-33.5766	-350.226	-728.782	-879.88
59.1	-61.2183	-61.3708	-62.6526	-62.3474	-62.8357							59.1	-57.4036	-56.8848	-58.0444	-57.4951					59.1	-51.6052	-51.3611	-51.5137	-51.2695							59.05	2.81924	-5.90733	4.39598	-36.6284	-348.394	-729.392	-883.542
59.15	-61.0657	-61.0962	-62.6221	-62.3474	-62.7441							59.15	-57.373	-57.1594	-57.8918	-57.2205					59.15	-51.4526	-51.4526	-51.3	-51.178							59.1	1.59854	-4.68663	4.0908	-34.4921	-348.7	-730.918	-882.626
59.2	-61.3098	-61.3403	-62.6221	-62.2253	-62.7441							59.2	-57.2815	-57.0679	-58.0749	-57.4951					59.2	-51.5747	-51.6663	-51.178	-51.0559							59.15	-1.45322	-5.60216	5.92186	-32.0507	-349.92	-730.613	-881.101
59.25	-61.1877	-61.4319	-62.439	-62.3474	-62.7747							59.25	-57.5561	-57.0068	-58.1055	-57.4951					59.25	-51.6663	-51.4221	-51.5747	-51.0254							59.2	-0.232513	-4.38145	4.39598	-35.4077	-350.836	-729.392	-886.594
59.3	-60.9436	-61.2793	-62.3474	-62.3779	-62.7136							59.3	-57.4341	-56.8542	-58.0444	-57.4036					59.3	-51.7883	-51.3306	-51.5442	-51.1475							59.25	1.90372	-4.99181	1.95457	-34.187	-347.784	-728.476	-884.152
59.35	-61.3098	-61.1267	-62.6526	-62.0422	-62.7136							59.35	-57.4951	-56.9763	-57.8918	-57.1594					59.35	-51.6968	-51.5442	-51.4526	-51.3306							59.3	2.81924	-4.68663	1.6494	-29.6093	-344.732	-726.645	-882.016
59.4	-61.1572	-61.3708	-62.7136	-62.5	-62.8357							59.4	-57.4036	-57.0984	-57.8613	-57.5256					59.4	-51.6357	-51.5137	-51.178	-51.2085							59.35	-0.232513	-4.07628	2.8701	-34.187	-346.563	-725.425	-887.204
59.45	-61.0962	-61.4014	-62.5915	-62.3474	-62.7136							59.45	-57.3425	-57.0373	-58.0749	-57.4341					59.45	-51.5747	-51.2695	-51.4221	-51.2695							59.4	1.90372	-4.38145	6.53221	-34.187	-347.784	-726.035	-886.899
59.5	-61.2488	-61.2488	-62.5915	-62.1948	-62.561							59.5	-57.4951	-56.9763	-58.0139	-57.4646					59.5	-51.5747	-51.4526	-51.5137	-51.3							59.45	4.34512	-4.38145	7.44774	-32.0507	-348.394	-727.866	-882.016
59.55	-60.9436	-61.1877	-62.5305	-62.439	-62.8357							59.55	-57.4646	-56.7932	-57.8918	-57.2815					59.55	-51.3916	-51.4832	-51.5137	-51.2695							59.5	0.377838	-5.90733	3.48045	-32.3559	-346.563	-730.002	-885.678
59.6	-61.3098	-61.4014	-62.5305	-62.2864	-62.7747							59.6	-57.4646	-56.9458	-57.8613	-57.6782					59.6	-51.4832	-51.3916	-51.3306	-51.178							59.55	1.29337	-7.12804	4.0908	-34.187	-345.038	-731.833	-885.373
59.65	-61.1572	-61.3403	-62.4695	-62.439	-62.5305							59.65	-57.373	-57.0373	-58.0139	-57.5256					59.65	-51.6052	-51.3611	-51.239	-50.9338							59.6	4.6503	-8.65391	4.70116	-33.8818	-347.784	-733.359	-882.932
59.7	-61.1877	-61.1877	-62.6831	-62.4695	-62.6221							59.7	-57.2815	-57.0373	-58.0139	-57.5256					59.7	-51.7578	-51.5442	-51.4526	-51.0559							59.65	0.377838	-9.87462	7.44774	-30.83	-349.615	-731.833	-882.321
59.75	-61.2488	-61.0657	-62.7136	-62.1338	-62.8052							59.75	-57.5256	-56.8848	-57.9529	-57.2815					59.75	-51.7883	-51.5137	-51.5442	-51.178							59.7	1.29337	-9.56944	3.17528	-35.7128	-348.7	-730.307	-885.068
59.8	-61.0657	-61.3403	-62.6831	-62.5	-62.6831							59.8	-57.5561	-56.8237	-57.8308	-57.7393					59.8	-51.7578	-51.2695	-51.4221	-51.239							59.75	5.871	-8.04356	4.0908	-34.4921	-345.953	-728.476	-882.321
59.85	-61.3403	-61.3403	-62.6221	-62.3169	-62.3779							59.85	-57.4646	-57.0373	-57.8613	-57.4951					59.85	-51.6357	-51.4832	-51.3306	-51.2695							59.8	0.072662	-4.99181	7.75291	-32.9662	-344.122	-731.833	-878.659
59.9	-61.1572	-61.3098	-62.5	-62.4695	-62.7441							59.9	-57.373	-57.0068	-58.0444	-57.6172					59.9	-51.6357	-51.4832	-51.2085	-51.2085							59.85	1.90372	-3.46593	4.0908	-34.187	-346.258	-733.664	-882.016
59.95	-61.1572	-61.1877	-62.5	-62.4084	-62.6526							59.95	-57.2815	-57.0984	-57.9529	-57.3425					59.95	-51.4221	-51.4221	-51.4526	-51.239							59.9	2.51407	-3.7711	5.31151	-35.4077	-348.394	-731.528	-880.49
60	-61.2488	-61.3708	-62.6831	-62.2253	-62.5							60	-57.4036	-56.8542	-57.8613	-57.7393					60	-51.6968	-51.3306	-51.4526	-51.2695							59.95	-0.842865	-6.21251	9.27879	-33.2714	-346.563	-730.002	-878.049
60.05	-61.0352	-61.4014	-62.6526	-62.5	-62.439							60.05	-57.5256	-56.7322	-57.6477	-57.5867					60.05	-51.7578	-51.5747	-51.3611	-51.0864							60	2.20889	-4.07628	5.31151	-30.5248	-345.038	-730.002	-874.997
60.1	-61.2793	-61.3708	-62.7441	-62.3474	-62.6831							60.1	-57.4341	-57.0068	-57.8918	-57.6172					60.1	-51.7883	-51.5137	-51.3306	-50.9033							60.05	0.683014	-2.24522	7.14256	-32.6611	-344.122	-733.054	-878.354
60.15	-61.3098	-61.1572	-62.6831	-62.2559	-62.6526							60.15	-57.4951	-57.0984	-57.9529	-57.373					60.15	-51.6663	-51.2695	-51.1475	-50.9338							60.1	-0.537689	0.806534	9.27879	-32.6611	-346.258	-732.749	-878.049
60.2	-61.0046	-61.3098	-62.7441	-62.5	-62.2253							60.2	-57.4036	-56.9763	-57.8613	-57.5561					60.2	-51.5137	-51.2695	-51.3306	-51.178							60.15	3.73477	-3.7711	3.17528	-29.3041	-348.394	-729.697	-875.913
60.25	-61.4319	-61.3708	-62.5915	-62.1948	-62.3474							60.25	-57.2205	-56.8542	-57.7393	-57.6172					60.25	-51.8188	-51.5137	-51.4526	-51.178							60.2	-0.842865	-4.07628	6.53221	-28.6938	-346.258	-730.307	-877.438
60.3	-61.1877	-61.3403	-62.3169	-62.3779	-62.439							60.3	-57.4036	-56.7932	-57.6477	-57.5561					60.3	-51.7273	-51.5137	-51.3916	-51.0559							60.25	2.51407	-1.94005	4.0908	-32.0507	-345.648	-732.444	-882.016
60.35	-61.0046	-61.2793	-62.5	-62.2864	-62.1948							60.35	-57.5561	-57.0068	-57.8003	-57.3425					60.35	-51.6663	-51.3306	-51.3	-50.9644							60.3	3.12442	-2.24522	1.6494	-29.9145	-342.291	-730.613	-880.795
60.4	-61.3403	-61.3098	-62.5	-62.0728	-61.8896							60.4	-57.4036	-57.0679	-57.8918	-57.2815					60.4	-51.5442	-51.3	-51.1169	-50.7507							60.35	0.98819	-4.99181	5.31151	-26.8627	-342.291	-729.697	-878.049
60.45	-61.3098	-61.4014	-62.6526	-62.1948	-62.0117							60.45	-57.4951	-57.0373	-57.7087	-57.373					60.45	-51.7273	-51.5442	-51.1475	-50.8423							60.4	4.34512	-4.99181	0.12352	-29.9145	-344.122	-732.444	-878.964
60.5	-60.9741	-61.3098	-62.5915	-62.1643	-61.8286							60.5	-57.2815	-56.9153	-57.6172	-57.2815					60.5	-51.6968	-51.5747	-51.3611	-50.9033							60.45	1.59854	-0.414169	4.70116	-30.5248	-344.732	-730.002	-880.185
60.55	-61.3403	-61.2488	-62.5305	-61.7065	-61.6455							60.55	-57.251	-56.8542	-57.4951	-57.0373					60.55	-51.5137	-51.3611	-51.2695	-50.8423							60.5	0.683014	-5.90733	2.25975	-28.0834	-343.206	-730.002	-876.218
60.6	-61.2183	-61.1572	-62.4695	-62.0422	-61.4014							60.6	-57.373	-56.8542	-57.6477	-56.8237					60.6	-51.7578	-51.3306	-51.178	-50.5066							60.55	5.56583	-4.68663	1.03905	-24.7265	-342.291	-730.613	-872.861
60.65	-61.0657	-61.3098	-62.2559	-61.8286	-61.4014							60.65	-57.4951	-57.0679	-57.7087	-56.8542					60.65	-51.5747	-51.6357	-51.0559	-50.6897							60.6	0.683014	-1.02452	4.70116	-28.0834	-339.85	-726.645	-874.997
60.7	-61.4014	-61.3098	-62.1033	-61.4624	-61.2183							60.7	-57.312	-57.0679	-57.4646	-56.8237					60.7	-51.4832	-51.6052	-50.9644	-50.6287							60.65	0.98819	-5.29698	2.8701	-28.999	-341.681	-730.002	-874.997
60.75	-61.2793	-61.3708	-62.3474	-61.6455	-60.9131							60.75	-57.5561	-57.0984	-57.373	-56.6101					60.75	-51.7273	-51.4832	-50.9644	-50.415							60.7	4.34512	-5.60216	5.61668	-26.5576	-343.817	-728.782	-872.25
60.8	-61.0657	-61.2183	-62.2559	-61.5234	-60.5774							60.8	-57.373	-56.8848	-57.1899	-56.2439					60.8	-51.6052	-51.3611	-51.0254	-50.1404							60.75	-0.232513	-2.5504	3.17528	-25.0317	-345.038	-724.814	-867.062
60.85	-61.3708	-61.0962	-62.1643	-61.2488	-60.6079							60.85	-57.312	-56.7322	-57.1289	-55.9998					60.85	-51.5442	-51.6968	-50.9644	-50.2624							60.8	0.98819	-4.07628	2.8701	-29.3041	-343.206	-728.171	-868.283
60.9	-61.3403	-61.3708	-61.7981	-61.1267	-60.3027							60.9	-57.3425	-56.9763	-57.1289	-56.1218					60.9	-51.6968	-51.5137	-50.9338	-50.0488							60.85	4.34512	-5.29698	6.83739	-29.6093	-341.375	-724.814	-867.978
60.95	-61.0046	-61.3098	-61.8896	-61.0657	-60.0281							60.95	-57.4951	-57.0679	-56.9763	-55.7251					60.95	-51.4832	-51.4221	-50.7507	-49.9268							60.9	0.98819	-1.94005	2.56493	-29.6093	-338.324	-725.73	-864.926
61	-61.2793	-61.2488	-61.8896	-60.8215	-59.6924							61	-57.5867	-56.9763	-56.9458	-55.542					61	-51.7883	-51.3306	-50.4456	-49.9268							60.95	0.683014	-4.07628	5.31151	-25.9472	-339.85	-726.645	-858.212
61.05	-61.2793	-60.9131	-61.7371	-60.5774	-59.6924							61.05	-57.4646	-56.9458	-56.5491	-55.0842					61.05	-51.6663	-51.6357	-50.5676	-49.5605							61	5.871	-3.46593	3.48045	-29.6093	-341.681	-721.763	-857.297
61.1	-61.1572	-61.0657	-61.3098	-60.6384	-59.4788							61.1	-57.4951	-56.8237	-56.3354	-54.9622					61.1	-51.4832	-51.4526	-50.6592	-49.5911							61.05	3.12442	-1.3297	1.03905	-29.9145	-341.375	-728.171	-858.823
61.15	-61.0962	-61.2793	-61.5845	-60.4553	-59.2346							61.15	-57.4341	-56.6406	-56.427	-54.9316					61.15	-51.7883	-51.3611	-50.5981	-49.53							61.1	2.51407	-1.63487	5.61668	-27.7783	-340.155	-726.645	-856.381
61.2	-61.2793	-61.2183	-61.3403	-59.9976	-58.7158							61.2	-57.2815	-56.7932	-56.366	-54.5654					61.2	-51.6357	-51.2695	-50.4456	-49.0723							61.15	4.95547	-2.85558	2.25975	-25.642	-338.018	-727.256	-852.719
61.25	-61.2183	-61.0962	-61.0657	-60.2112	-58.8379							61.25	-57.312	-56.8542	-56.0608	-54.3213					61.25	-51.6968	-51.4526	-50.2014	-49.1638							61.2	4.6503	-1.3297	1.6494	-28.6938	-335.882	-729.697	-853.33
61.3	-61.0352	-60.7605	-61.1267	-59.8144	-58.5632							61.3	-57.5561	-56.7932	-55.9082	-53.9856					61.3	-51.7273	-51.5137	-49.9878	-49.0723							61.25	1.59854	-0.108994	6.22704	-29.6093	-333.746	-726.34	-857.602
61.35	-61.3098	-60.9436	-61.0657	-59.6008	-58.3801							61.35	-57.7087	-56.7627	-55.542	-53.8025					61.35	-51.4221	-51.3611	-49.9878	-48.6755							61.3	2.81924	-2.85558	1.95457	-28.6938	-335.272	-731.833	-857.297
61.4	-61.3098	-61.0046	-60.6079	-59.4177	-57.7087							61.4	-57.5561	-56.488	-55.4199	-53.6194					61.4	-51.7273	-51.0254	-50.0488	-48.9197							61.35	6.17618	-2.85558	2.25975	-24.7265	-337.103	-733.054	-856.381
61.45	-60.9741	-60.8826	-60.852	-59.4788	-57.8613							61.45	-57.5867	-56.366	-55.2978	-53.2837					61.45	-51.7883	-51.178	-49.9573	-48.5535							61.4	0.377838	0.806534	5.61668	-28.3886	-336.798	-732.138	-855.161
61.5	-61.3403	-60.7605	-60.5164	-59.1431	-57.6477							61.5	-57.4341	-56.3049	-55.2368	-53.0395					61.5	-51.4832	-51.3	-49.8352	-48.5229							61.45	1.90372	-2.5504	0.428696	-30.5248	-335.882	-738.242	-860.959
61.55	-61.2183	-60.5774	-60.4553	-58.6853	-57.4646							61.55	-57.4341	-56.4575	-54.9011	-52.5513					61.55	-51.8188	-51.0864	-49.7436	-48.4314							61.5	4.95547	-2.85558	1.95457	-29.6093	-334.662	-737.632	-861.569
61.6	-61.0962	-60.5469	-60.4248	-58.8989	-56.9458							61.6	-57.3425	-56.3965	-54.779	-52.2766					61.6	-51.5747	-50.9033	-49.5605	-48.0652							61.55	4.34512	-1.3297	5.92186	-26.8627	-334.051	-737.021	-860.654
61.65	-61.1572	-60.73	-60.0586	-58.6853	-56.7627							61.65	-57.373	-56.2134	-54.4739	-52.124					61.65	-51.5747	-50.6897	-49.2554	-48.1567							61.6	1.59854	1.11171	-0.181656	-25.9472	-334.356	-740.683	-857.602
61.7	-61.3403	-60.5164	-60.2722	-58.3496	-56.7627							61.7	-57.5867	-56.1218	-54.1687	-51.9104					61.7	-51.6663	-50.9338	-49.3469	-48.0041							61.65	2.81924	-3.16075	1.03905	-30.2197	-335.882	-738.242	-857.602
61.75	-61.2488	-60.4858	-59.9365	-58.1665	-56.5491							61.75	-57.6782	-55.9692	-54.1687	-51.5747					61.75	-51.6052	-50.9033	-49.408	-47.5464							61.7	7.09171	-3.16075	6.22704	-29.6093	-336.493	-737.632	-860.349
61.8	-60.9741	-60.2722	-59.7839	-58.1665	-56.1829							61.8	-57.6172	-55.6641	-54.1992	-51.178					61.8	-51.5442	-50.7507	-49.4385	-47.76							61.75	1.90372	-2.5504	1.34422	-26.5576	-335.272	-739.158	-856.687
61.85	-61.2793	-60.2112	-59.845	-58.0139	-55.7251							61.85	-57.4341	-55.6946	-53.833	-50.8118					61.85	-51.6663	-50.5981	-49.2248	-47.5769							61.8	1.29337	-0.414169	1.6494	-23.5058	-333.746	-734.275	-854.855
61.9	-61.2793	-60.2722	-59.4177	-57.4646	-55.8166							61.9	-57.4646	-55.8166	-53.6194	-50.8423					61.9	-51.5137	-50.5371	-49.1028	-47.1802							61.85	3.4296	-3.46593	5.92186	-27.1679	-332.22	-733.664	-852.109
61.95	-61.2183	-60.2112	-59.6008	-57.6477	-55.6335							61.95	-57.4341	-55.7861	-53.3447	-50.6287					61.95	-51.6357	-50.6592	-48.9197	-47.3328							61.9	5.56583	-3.7711	3.17528	-26.8627	-328.558	-735.801	-855.466
62	-61.0657	-60.0586	-59.4482	-57.4341	-55.2978							62	-57.4341	-55.5115	-53.1006	-50.2319					62	-51.7578	-50.5066	-48.8281	-47.1802							61.95	0.377838	-1.94005	1.6494	-25.9472	-326.422	-732.138	-854.855
62.05	-61.3708	-60.1196	-59.2041	-57.1594	-54.9011							62.05	-57.373	-55.481	-52.9175	-49.8962					62.05	-51.6052	-50.415	-48.6755	-46.875							62	0.98819	-1.02452	4.39598	-24.1162	-327.337	-730.002	-852.719
62.1	-61.3098	-59.7839	-59.2651	-56.9153	-54.5959							62.1	-57.5867	-55.3284	-52.9175	-49.4995					62.1	-51.4526	-50.1709	-48.7976	-47.0581							62.05	3.12442	-3.46593	3.17528	-23.5058	-327.643	-733.359	-850.278
62.15	-61.1267	-59.7229	-59.021	-56.9458	-54.6875							62.15	-57.6782	-55.1147	-52.8259	-49.1943					62.15	-51.8494	-50.2014	-48.7976	-46.7529							62.1	3.4296	-4.38145	2.25975	-27.7783	-327.032	-731.833	-847.226
62.2	-61.1572	-59.967	-59.2651	-56.7322	-54.3823							62.2	-57.7087	-54.9622	-52.7039	-49.1028					62.2	-51.7273	-50.293	-48.7061	-46.4783							62.15	-0.232513	-2.5504	3.78563	-27.7783	-324.591	-730.307	-849.667
62.25	-61.3403	-59.8755	-59.082	-56.2744	-54.0161							62.25	-57.4951	-55.0537	-52.4597	-48.8281					62.25	-51.3306	-50.1099	-48.6145	-46.6614							62.2	0.683014	0.501358	5.61668	-26.8627	-323.675	-734.58	-848.142
62.3	-61.3098	-59.6619	-58.6853	-56.3354	-53.5889							62.3	-57.4951	-55.0537	-52.2461	-48.4314					62.3	-51.6968	-50.1709	-48.584	-46.4172							62.25	5.26065	-2.85558	1.34422	-24.1162	-321.539	-734.885	-845.7
62.35	-61.0046	-59.5398	-58.8074	-56.2134	-53.4668							62.35	-57.4646	-54.9927	-52.0325	-48.0957					62.35	-51.7273	-49.8657	-48.4924	-46.0815							62.3	3.12442	-3.46593	2.56493	-27.1679	-320.013	-732.749	-842.954
62.4	-61.2488	-59.3262	-58.8074	-56.0303	-53.5583							62.4	-57.5867	-54.7485	-51.8188	-47.6074					62.4	-51.5747	-49.8962	-48.2178	-46.3867							62.35	1.29337	-2.5504	5.92186	-29.3041	-322.455	-737.326	-841.733
62.45	-61.4624	-59.4482	-58.5327	-55.5725	-53.1921							62.45	-57.8003	-54.7485	-51.7578	-47.2717					62.45	-51.5747	-50.0183	-48.1262	-46.1426							62.4	2.20889	1.72206	2.56493	-28.6938	-325.811	-737.021	-842.954
62.5	-61.2183	-59.5398	-58.6548	-55.6946	-53.0395							62.5	-57.5561	-54.6265	-51.7578	-47.1802					62.5	-51.6663	-49.9573	-48.1873	-45.9595							62.45	5.56583	0.501358	1.34422	-28.0834	-324.591	-734.58	-842.038
62.55	-61.0962	-59.4177	-58.4412	-55.481	-52.8259							62.55	-57.6782	-54.5044	-51.5747	-46.875					62.55	-51.7273	-49.8962	-48.3398	-45.8069							62.5	5.26065	-1.94005	5.00633	-25.3369	-322.455	-733.97	-841.123
62.6	-61.3403	-59.4788	-58.3496	-55.2368	-52.7344							62.6	-57.4036	-54.2603	-51.4526	-46.3562					62.6	-51.4221	-49.7131	-48.2483	-45.99							62.55	3.4296	-1.3297	3.17528	-27.4731	-320.929	-735.19	-837.46
62.65	-61.3708	-59.2346	-58.4412	-54.8096	-52.7649							62.65	-57.6782	-54.2908	-51.2085	-46.0815					62.65	-51.6968	-49.5605	-48.1262	-45.7458							62.6	2.20889	0.806534	1.95457	-28.6938	-324.591	-733.054	-834.104
62.7	-61.1877	-59.1736	-58.1665	-55.1147	-52.5818							62.7	-57.5867	-54.4739	-51.0559	-45.5017					62.7	-51.5747	-49.7742	-48.0041	-45.3491							62.65	2.51407	2.33241	0.428696	-27.7783	-325.201	-728.476	-836.85
62.75	-61.0657	-59.0515	-58.0444	-54.9316	-52.4292							62.75	-57.5867	-54.3518	-50.7812	-44.9829					62.75	-51.4832	-49.7436	-47.8516	-45.5933							62.7	3.73477	-1.02452	4.0908	-26.8627	-321.539	-732.138	-838.376
62.8	-61.3708	-59.2041	-58.1055	-54.6875	-52.2156							62.8	-57.6782	-54.1992	-50.6287	-44.8608					62.8	-51.4526	-49.6521	-47.821	-45.5322							62.75	5.871	-2.5504	-0.181656	-23.811	-321.844	-730.918	-836.85
62.85	-61.3098	-59.2651	-57.9529	-54.4434	-52.063							62.85	-57.6477	-54.2297	-50.6287	-44.5251					62.85	-51.5747	-49.469	-47.9126	-45.2881							62.8	5.26065	-2.5504	-0.792007	-23.2006	-325.811	-726.951	-834.714
62.9	-61.2793	-59.1125	-57.6172	-54.779	-52.1851							62.9	-57.5867	-54.0161	-50.5981	-44.0674					62.9	-51.4832	-49.408	-47.821	-45.0134							62.85	2.81924	-0.108994	2.56493	-25.9472	-323.065	-729.392	-832.578
62.95	-61.0352	-59.1125	-57.8613	-54.718	-52.063							62.95	-57.6477	-53.8635	-50.4761	-43.5181					62.95	-51.239	-49.469	-47.76	-45.166							62.9	0.98819	1.11171	2.56493	-25.642	-320.318	-730.002	-835.324
63	-61.3403	-59.0515	-57.7393	-54.5654	-51.9409							63	-57.8308	-54.0771	-50.293	-43.0298					63	-51.5442	-49.4995	-47.5769	-45.166							62.95	0.377838	-2.24522	1.03905	-24.4213	-324.591	-729.392	-838.071
63.05	-61.3403	-58.9294	-57.5256	-54.3518	-51.6357							63.05	-57.4646	-53.9246	-50.1709	-42.2668					63.05	-51.5747	-49.469	-47.7295	-44.7693							63	0.377838	-3.7711	2.25975	-23.2006	-322.149	-726.951	-838.986
63.1	-61.2793	-58.8379	-57.5867	-54.5959	-51.3916							63.1	-57.7087	-53.9551	-50.0793	-41.7175					63.1	-51.4221	-49.53	-47.6685	-44.8608							63.05	0.683014	-2.85558	5.61668	-21.0644	-320.318	-730.307	-838.986
63.15	-61.0352	-58.96	-57.4951	-54.6875	-51.5442							63.15	-57.6782	-53.5583	-49.8047	-41.2903					63.15	-51.3306	-49.3469	-47.6074	-44.8303							63.1	2.20889	0.501358	1.03905	-25.0317	-323.98	-728.782	-837.766
63.2	-61.3098	-59.1125	-57.1899	-54.4739	-51.4832							63.2	-57.4646	-53.894	-49.6826	-40.6799					63.2	-51.6663	-49.1333	-47.5464	-44.6167							63.15	3.73477	0.806534	1.95457	-26.2524	-319.708	-726.951	-838.681
63.25	-61.3403	-58.96	-57.4951	-54.4128	-51.3306							63.25	-57.7698	-53.8025	-49.7131	-39.7949					63.25	-51.5137	-49.2248	-47.6685	-44.3726							63.2	0.98819	-2.85558	3.78563	-26.2524	-320.929	-723.899	-840.817
63.3	-61.3098	-58.8684	-57.2815	-54.4128	-51.0254							63.3	-57.7087	-53.7109	-49.7436	-38.9099					63.3	-51.3916	-49.408	-47.5464	-44.4946							63.25	-1.14804	-3.16075	5.00633	-24.7265	-322.149	-724.509	-843.869
63.35	-61.0046	-58.8379	-57.0679	-54.5654	-50.7202							63.35	-57.5561	-53.6194	-49.469	-37.8113					63.35	-51.3916	-49.4385	-47.3938	-44.3726							63.3	-2.06357	-1.02452	1.34422	-21.6747	-318.182	-722.373	-843.869
63.4	-61.1877	-58.6853	-57.0984	-54.4739	-50.5371							63.4	-57.7393	-53.7415	-49.2554	-36.3769					63.4	-51.6357	-49.3164	-47.5159	-44.2505							63.35	-1.14804	1.72206	1.95457	-21.9799	-323.065	-718.406	-843.564
63.45	-61.3708	-58.9905	-57.251	-54.3213	-50.6287							63.45	-57.5867	-53.6499	-49.0112	-34.729					63.45	-51.5442	-49.2554	-47.4548	-44.0674							63.4	-1.14804	1.72206	5.61668	-24.4213	-320.318	-719.016	-842.343
63.5	-61.4014	-58.8074	-57.0373	-54.1687	-50.3845							63.5	-57.7698	-53.6499	-49.1943	-32.959					63.5	-51.2695	-49.1333	-47.3022	-44.2505							63.45	0.072662	-0.719345	5.61668	-25.0317	-320.929	-718.711	-842.343
63.55	-61.1267	-58.7769	-56.7627	-54.5349	-50.1099							63.55	-57.8613	-53.7415	-49.0112	-30.5176					63.55	-51.4832	-49.1638	-47.3328	-44.0369							63.5	3.4296	-1.02452	3.17528	-23.811	-321.844	-716.88	-844.174
63.6	-61.0962	-58.6548	-57.0679	-54.2908	-49.8047							63.6	-57.4951	-53.4668	-48.7976	-26.8555					63.6	-51.6968	-49.3774	-47.2412	-43.8232							63.55	4.34512	0.196182	3.78563	-22.2851	-316.656	-713.828	-847.226
63.65	-61.4319	-58.8989	-56.9763	-54.3213	-49.53							63.65	-57.7698	-53.6804	-48.5229	-21.8811					63.65	-51.5442	-49.2859	-47.4548	-43.7927							63.6	2.20889	1.41688	7.44774	-20.454	-319.708	-716.88	-848.447
63.7	-61.3098	-58.7463	-56.5491	-54.0771	-49.2859							63.7	-57.6477	-53.6804	-48.7976	-15.625					63.7	-51.3611	-49.2248	-47.3633	-43.9758							63.65	-0.232513	4.16347	5.00633	-21.3696	-316.961	-715.354	-847.531
63.75	-61.1267	-58.6243	-56.7017	-54.2908	-49.3164							63.75	-57.7698	-53.3752	-48.584	-8.05664					63.75	-51.5137	-49.2554	-47.1497	-43.7927							63.7	-1.14804	0.501358	1.34422	-23.5058	-313.299	-712.912	-846.311
63.8	-60.9436	-58.7463	-56.7932	-54.3518	-49.1333							63.8	-57.8003	-53.5583	-48.1873	0.823975					63.8	-51.6357	-49.0417	-47.4853	-43.6096							63.75	0.683014	-1.02452	1.6494	-26.8627	-313.604	-710.166	-845.7
63.85	-61.3098	-58.8074	-56.5491	-54.2908	-48.9502							63.85	-57.5256	-53.4973	-48.4619	10.2844					63.85	-51.5137	-48.9807	-47.3022	-43.5181							63.8	-0.232513	-0.414169	5.31151	-25.9472	-309.637	-713.828	-844.785
63.9	-61.3708	-58.5937	-56.3354	-54.0466	-48.7366							63.9	-57.8308	-53.4973	-48.3704	19.8669					63.9	-51.3306	-49.1333	-47.3328	-43.7622							63.85	1.29337	-0.414169	2.56493	-24.7265	-312.689	-713.828	-847.836
63.95	-61.2183	-58.7463	-56.6101	-53.833	-48.4924							63.95	-57.8918	-53.5889	-48.0957	28.8086					63.95	-51.4221	-49.2248	-47.3328	-43.6096							63.9	1.59854	1.72206	-1.09718	-24.7265	-312.384	-711.692	-849.057
64	-61.1572	-58.7769	-56.5491	-54.0771	-48.3093							64	-57.5561	-53.2837	-48.2788	37.2925					64	-51.6663	-49.2248	-47.1191	-43.3655							63.95	2.20889	4.16347	0.428696	-24.7265	-308.111	-709.861	-849.667
64.05	-61.0962	-58.5327	-56.3049	-54.0161	-48.4009							64.05	-57.8613	-53.6499	-48.0041	44.5862					64.05	-51.6052	-49.1333	-47.4548	-43.3044							64	-0.232513	2.02724	3.17528	-28.0834	-313.299	-715.354	-848.752
64.1	-61.4014	-58.8074	-56.427	-53.894	-48.4009							64.1	-57.8003	-53.6194	-47.9736	50.5676					64.1	-51.3916	-49.0723	-47.3328	-43.5486							64.05	-2.67392	-0.414169	2.56493	-28.0834	-311.773	-715.049	-846.921
64.15	-61.2793	-58.8074	-56.427	-53.5889	-48.2178							64.15	-57.5867	-53.3142	-48.0347	55.2063					64.15	-51.3916	-49.0112	-47.2717	-43.396							64.1	-1.45322	1.72206	-0.792007	-28.3886	-309.942	-713.523	-845.7
64.2	-61.3098	-58.7463	-56.366	-53.5583	-48.2483							64.2	-58.0139	-53.5583	-47.76	58.3801					64.2	-51.6663	-48.8281	-47.4243	-43.2739							64.15	-1.14804	2.02724	0.428696	-28.6938	-314.215	-710.166	-848.447
64.25	-61.0962	-58.9294	-56.1218	-53.8025	-48.1262							64.25	-57.7698	-53.4058	-48.0347	59.9365					64.25	-51.5747	-48.9197	-47.2107	-43.1519							64.2	0.377838	3.24794	3.78563	-26.8627	-310.553	-714.133	-850.888
64.3	-61.1877	-58.6243	-56.5491	-53.6194	-48.0347							64.3	-57.5867	-53.5889	-47.9736	59.7839					64.3	-51.4221	-49.1638	-47.5464	-43.3044							64.25	0.98819	3.85829	3.48045	-24.7265	-310.247	-712.912	-851.499
64.35	-61.3403	-58.8989	-56.4575	-53.4668	-47.9431							64.35	-57.9529	-53.5278	-47.76	58.136					64.35	-51.3	-49.2248	-47.4548	-43.2129							64.3	3.12442	0.806534	0.428696	-24.1162	-313.299	-710.776	-851.193
64.4	-61.2488	-58.8684	-56.3965	-53.2532	-48.1567							64.4	-57.8918	-53.2532	-47.9736	55.1758					64.4	-51.6052	-49.0417	-47.2717	-43.0908							64.35	1.90372	0.196182	1.95457	-26.5576	-311.163	-706.504	-850.888
64.45	-61.2183	-58.8989	-56.2744	-53.3447	-48.2788							64.45	-57.5867	-53.5889	-47.8516	50.7202					64.45	-51.5137	-49.1638	-47.6685	-42.8772							64.4	-1.14804	0.196182	4.70116	-27.1679	-308.722	-710.166	-849.362
64.5	-61.0657	-58.8379	-56.5491	-53.4973	-48.1873							64.5	-57.8613	-53.6194	-47.9431	44.9219					64.5	-51.4221	-49.1028	-47.3938	-42.9687							64.45	-2.36874	1.11171	7.14256	-27.4731	-311.468	-709.25	-845.7
64.55	-61.0657	-58.6853	-56.5186	-53.3142	-48.1873							64.55	-57.8918	-53.3142	-47.9431	37.8723					64.55	-51.2085	-49.1028	-47.2717	-42.9382							64.5	-1.75839	2.63759	2.8701	-26.2524	-308.722	-707.114	-844.174
64.6	-61.2793	-58.9905	-56.3965	-53.3142	-48.0652							64.6	-57.7698	-53.6194	-47.6074	30.2124					64.6	-51.4526	-48.9502	-47.7295	-42.9382							64.55	-2.06357	5.68935	2.56493	-24.4213	-306.585	-703.147	-843.259
64.65	-61.2793	-58.8684	-56.3049	-53.1006	-47.8821							64.65	-57.7087	-53.5889	-47.9126	22.1558					64.65	-51.5747	-49.0723	-47.6379	-42.7246							64.6	-0.842865	3.55312	3.48045	-22.2851	-310.247	-705.893	-843.564
64.7	-61.2793	-58.8684	-56.5796	-53.1311	-47.699							64.7	-57.8918	-53.4973	-47.76	13.9465					64.7	-51.5442	-49.2248	-47.3633	-42.572							64.65	-1.45322	1.11171	7.44774	-21.3696	-307.806	-708.03	-842.038
64.75	-61.1572	-58.8989	-56.4575	-53.3142	-47.7295							64.75	-57.9224	-53.6194	-47.7295	5.61523					64.75	-51.2695	-49.3469	-47.699	-42.7246							64.7	0.683014	0.501358	4.70116	-22.2851	-305.06	-705.588	-840.207
64.8	-61.0046	-58.6853	-56.2439	-53.3142	-47.8516							64.8	-57.6172	-53.6499	-47.7295	-2.19727					64.8	-51.3	-49.2859	-47.76	-42.5415							64.75	0.377838	2.02724	2.25975	-23.5058	-309.942	-702.536	-838.986
64.85	-61.2793	-58.9905	-56.3354	-53.2837	-47.6074							64.85	-57.8918	-53.4973	-47.6074	-9.82666					64.85	-51.5137	-49.1638	-47.6379	-42.4499							64.8	-0.232513	2.02724	1.95457	-24.4213	-308.111	-701.316	-837.766
64.9	-61.2488	-58.7769	-56.4575	-53.2227	-47.4243							64.9	-57.8613	-53.8025	-47.821	-17.3645					64.9	-51.4526	-49.1638	-47.9126	-42.1448							64.85	-1.45322	3.85829	4.39598	-23.5058	-303.839	-703.452	-836.85
64.95	-61.2183	-58.8074	-56.427	-53.1006	-47.2107							64.95	-57.6782	-53.772	-47.821	-24.1089					64.95	-51.3916	-49.1333	-47.7905	-42.2974							64.9	-1.45322	3.24794	5.61668	-22.8954	-308.416	-701.621	-836.545
65	-61.1877	-58.96	-56.2439	-53.3752	-46.9971							65	-57.8308	-53.5278	-47.5464	-30.1819					65	-51.239	-49.1028	-47.6685	-42.2974							64.95	-0.842865	0.501358	1.03905	-20.454	-308.416	-701.011	-838.071
65.05	-60.9436	-58.6548	-56.2744	-53.4973	-46.6614							65.05	-57.8003	-53.9246	-47.9431	-35.8276					65.05	-51.3	-48.9807	-47.9736	-42.2363							65	1.59854	-1.3297	0.733871	-20.1489	-305.365	-698.264	-839.902
65.1	-61.0962	-58.9905	-56.3965	-53.4973	-46.4783							65.1	-57.7698	-53.833	-47.8516	-41.5344					65.1	-51.5137	-49.2554	-47.9126	-42.0837							65.05	2.51407	-1.02452	1.03905	-17.0971	-306.28	-699.485	-840.817
65.15	-61.3098	-58.8379	-56.4575	-53.3752	-46.5088							65.15	-57.6172	-53.5583	-47.7295	-46.3562					65.15	-51.3306	-49.3469	-47.8516	-41.7786							65.1	4.03995	-1.02452	4.70116	-17.7075	-310.858	-702.536	-840.817
65.2	-61.2183	-58.6243	-56.2744	-53.2532	-46.4478							65.2	-57.8613	-53.894	-47.8821	-50.8423					65.2	-51.2695	-49.408	-47.8821	-42.0227							65.15	4.34512	-1.02452	2.25975	-20.1489	-309.637	-700.705	-839.292
65.25	-61.1877	-58.96	-56.3049	-53.3752	-46.1426							65.25	-57.7393	-53.9246	-47.9431	-54.9011					65.25	-51.1475	-49.2248	-48.0652	-42.0532							65.2	3.73477	0.196182	1.03905	-21.0644	-307.501	-697.348	-839.902
65.3	-61.0962	-58.9294	-56.5491	-53.4973	-45.8679							65.3	-57.6782	-53.894	-47.821	-59.1431					65.3	-51.1475	-49.2859	-47.9736	-41.9922							65.25	1.59854	1.72206	0.733871	-20.454	-312.079	-694.297	-839.902
65.35	-61.0046	-58.6853	-56.427	-53.4668	-45.5933							65.35	-57.7698	-53.8025	-48.1567	-62.5					65.35	-51.3611	-49.1638	-47.7295	-41.7786							65.3	-0.232513	-0.719345	2.25975	-18.3178	-312.994	-696.128	-837.46
65.4	-61.1267	-58.9294	-56.3965	-53.4973	-45.6543							65.4	-57.8308	-54.1077	-48.0041	-65.4602					65.4	-51.239	-49.1638	-48.0957	-41.5955							65.35	0.072662	-2.85558	4.70116	-17.4023	-308.722	-696.433	-836.85
65.45	-61.3403	-58.8379	-56.4575	-53.3752	-45.5627							65.45	-57.7087	-54.0466	-48.0347	-68.6645					65.45	-51.3306	-49.2859	-48.0652	-41.8091							65.4	-0.232513	-3.46593	4.70116	-16.7919	-309.637	-693.686	-838.071
65.5	-61.2183	-58.8379	-56.6101	-53.3142	-45.3491							65.5	-57.4951	-53.9551	-48.1567	-71.1365					65.5	-50.9949	-49.4385	-47.9126	-41.7786							65.45	0.377838	-3.7711	3.17528	-20.7592	-310.553	-690.024	-838.681
65.55	-61.2488	-58.96	-56.5491	-53.3752	-44.8608							65.55	-57.8613	-54.1687	-48.3398	-73.1506					65.55	-51.1475	-49.408	-48.1262	-41.7175							65.5	0.072662	-5.29698	1.95457	-20.7592	-308.111	-686.667	-838.681
65.6	-61.1267	-58.8379	-56.488	-53.4973	-45.105							65.6	-57.7698	-54.1992	-48.2483	-75.4089					65.6	-51.3306	-49.3164	-48.1873	-41.4734							65.55	1.29337	-4.07628	3.17528	-21.3696	-303.839	-689.109	-839.292
65.65	-60.9436	-58.8074	-56.488	-53.5278	-44.9524							65.65	-57.7087	-54.1382	-48.2483	-76.9958					65.65	-51.3306	-49.3469	-48.1262	-41.2903							65.6	2.20889	-1.63487	5.61668	-18.3178	-306.28	-689.414	-838.376
65.7	-61.2488	-58.9905	-56.6711	-53.4668	-44.5251							65.7	-57.4341	-54.3213	-48.7061	-78.2471					65.7	-51.239	-49.53	-48.0041	-41.4429							65.65	1.90372	-0.414169	5.92186	-21.3696	-304.449	-689.719	-837.46
65.75	-61.3403	-58.8379	-56.7322	-53.5278	-44.5251							65.75	-57.8613	-54.4128	-48.7061	-79.834					65.75	-50.9949	-49.53	-48.3398	-41.5344							65.7	1.59854	-1.94005	1.95457	-23.2006	-302.008	-687.888	-836.24
65.8	-61.2488	-58.8379	-56.8542	-53.2532	-44.4946							65.8	-57.7393	-54.3518	-48.5535	-80.5359					65.8	-50.9949	-49.2248	-48.2788	-41.3513							65.75	-0.842865	-3.16075	1.34422	-21.0644	-301.092	-686.667	-833.798
65.85	-61.2793	-59.021	-56.7627	-53.3752	-44.1284							65.85	-57.7087	-54.2603	-48.9502	-80.9936					65.85	-51.1475	-49.6521	-48.2178	-41.1682							65.8	0.377838	-3.16075	1.6494	-18.623	-302.923	-689.109	-836.545
65.9	-61.2488	-58.8989	-56.7017	-53.6499	-44.0979							65.9	-57.5867	-54.6875	-49.0417	-82.0618					65.9	-51.2695	-49.5605	-48.3398	-41.0461							65.85	-1.45322	-3.16075	3.17528	-23.2006	-301.397	-692.466	-839.292
65.95	-61.0046	-58.7463	-57.0373	-53.8635	-43.9758							65.95	-57.8613	-54.5044	-49.0417	-82.3669					65.95	-51.2085	-49.3164	-48.4619	-41.1072							65.9	-1.75839	-1.63487	5.00633	-21.9799	-295.294	-691.855	-839.597
66	-61.0657	-58.9905	-56.8848	-53.7109	-43.5181							66	-57.7087	-54.5044	-49.2248	-82.3669					66	-51.0864	-49.6521	-48.4619	-41.2292							65.95	-0.842865	-1.94005	2.56493	-18.3178	-297.125	-689.109	-838.071
66.05	-61.2793	-59.0515	-57.0373	-53.7415	-43.7622							66.05	-57.6477	-54.6265	-49.3774	-82.7942					66.05	-50.9949	-49.6521	-48.2483	-41.0767							66	0.377838	-0.719345	0.12352	-22.5903	-296.515	-685.752	-835.629
66.1	-61.4014	-58.6853	-56.7932	-53.772	-43.4875							66.1	-57.5867	-54.9011	-49.53	-82.7637					66.1	-51.1475	-49.3774	-48.645	-41.1377							66.05	1.29337	0.806534	0.428696	-21.3696	-292.547	-686.972	-841.428
66.15	-61.2488	-59.1125	-57.0373	-53.7109	-43.2739							66.15	-57.9834	-54.7485	-49.4995	-82.428					66.15	-51.2085	-49.7436	-48.645	-40.802							66.1	1.90372	1.11171	2.25975	-18.623	-288.275	-688.193	-841.428
66.2	-61.3403	-58.9905	-57.1594	-53.833	-43.2129							66.2	-57.7393	-54.5959	-49.8352	-82.5195					66.2	-51.0559	-49.7131	-48.6755	-40.6799							66.15	2.51407	0.501358	5.92186	-22.2851	-291.632	-684.836	-838.986
66.25	-61.1877	-58.8074	-57.1594	-53.9246	-42.9382							66.25	-57.6172	-54.8706	-49.9268	-82.2143					66.25	-51.1169	-49.4995	-48.645	-40.8325							66.2	3.73477	-1.02452	5.92186	-18.9282	-291.327	-682.7	-838.071
66.3	-61.0657	-59.0515	-57.0984	-54.1382	-42.7856							66.3	-57.5561	-55.0537	-49.9878	-81.6955					66.3	-51.0254	-49.8352	-48.8586	-40.9851							66.25	5.871	-2.5504	3.48045	-20.7592	-287.97	-679.038	-842.648
66.35	-61.1877	-59.0515	-56.9153	-54.0771	-42.6025							66.35	-57.9224	-54.9622	-50.2319	-81.5735					66.35	-50.8118	-49.5911	-48.8586	-40.7104							66.3	5.56583	-3.46593	2.8701	-20.1489	-286.444	-678.122	-840.512
66.4	-61.3098	-58.8684	-57.2205	-54.1382	-42.1753							66.4	-57.7393	-54.8096	-50.4456	-80.9936					66.4	-50.9338	-49.8657	-48.8281	-40.6494							66.35	5.26065	-3.7711	4.70116	-15.5712	-290.716	-680.259	-837.46
66.45	-61.3403	-59.021	-57.312	-54.0771	-42.2058							66.45	-57.6172	-55.2978	-50.5981	-80.4443					66.45	-51.1475	-49.8962	-48.9197	-40.4358							66.4	4.03995	-3.16075	5.31151	-21.0644	-289.801	-682.395	-840.512
66.5	-61.3403	-59.1431	-57.2815	-54.0466	-41.687							66.5	-57.5561	-55.2978	-50.5981	-79.895					66.5	-51.0864	-49.5605	-49.2859	-40.2527							66.45	3.4296	-3.46593	7.75291	-19.8437	-287.359	-681.479	-839.597
66.55	-61.3403	-59.082	-57.0679	-54.0161	-41.5344							66.55	-57.9224	-55.1147	-51.0254	-79.5288					66.55	-51.1169	-49.9268	-49.1333	-40.3748							66.5	2.81924	-2.24522	8.97362	-17.4023	-286.139	-682.395	-834.104
66.6	-61.1877	-58.8684	-56.9458	-54.2908	-41.1682							66.6	-57.7393	-55.0842	-51.0559	-78.7353					66.6	-50.9338	-49.9573	-49.1028	-40.3442							66.55	0.98819	-2.85558	4.39598	-21.0644	-290.106	-681.479	-836.24
66.65	-61.0657	-59.2957	-57.2815	-54.3518	-40.5579							66.65	-57.6782	-55.4504	-51.178	-77.8809					66.65	-50.7507	-49.8352	-49.1333	-40.1306							66.6	0.98819	-0.719345	4.0908	-17.0971	-289.496	-680.869	-832.578
66.7	-61.0962	-59.1736	-57.3425	-54.3518	-40.5273							66.7	-57.5561	-55.542	-51.1475	-77.5757					66.7	-50.9033	-49.9878	-49.5911	-40.1001							66.65	0.683014	0.806534	4.0908	-21.9799	-287.359	-683.921	-830.136
66.75	-61.4014	-58.96	-57.2815	-54.3518	-39.8865							66.75	-57.8613	-55.4504	-51.6968	-76.8738					66.75	-51.1475	-49.7742	-49.4385	-39.8254							66.7	0.98819	0.806534	4.39598	-21.9799	-284.613	-685.141	-831.052
66.8	-61.2793	-59.2346	-57.1899	-54.2297	-39.4592							66.8	-57.8613	-55.3589	-51.6357	-76.0803					66.8	-51.1169	-50.1404	-49.2859	-39.5203							66.75	-0.232513	0.196182	5.92186	-17.4023	-290.106	-682.395	-826.474
66.85	-61.3098	-59.3567	-57.0679	-54.1687	-39.0015							66.85	-57.7393	-55.7556	-51.8188	-75.2869					66.85	-50.9338	-50.0793	-49.3774	-39.4287							66.8	0.377838	-0.719345	6.83739	-22.5903	-290.411	-680.564	-828
66.9	-61.1877	-59.2041	-57.4036	-54.2297	-38.3606							66.9	-57.6172	-55.7556	-51.9714	-74.8901					66.9	-50.9949	-49.7742	-49.7131	-39.4287							66.85	0.072662	-1.94005	3.78563	-20.7592	-290.106	-676.596	-829.526
66.95	-61.2183	-59.1125	-57.4646	-54.4434	-37.8723							66.95	-57.8613	-55.6335	-52.4597	-74.0662					66.95	-50.8728	-50.1709	-49.5605	-39.3066							66.9	-0.537689	-3.16075	2.25975	-20.1489	-287.664	-673.24	-826.169
67	-61.2793	-59.3567	-57.3425	-54.3518	-37.2009							67	-57.9224	-55.5115	-52.3071	-73.3337					67	-50.7812	-50.1709	-49.469	-38.9099							66.95	-0.842865	-3.7711	3.17528	-24.1162	-292.242	-675.071	-830.747
67.05	-61.3098	-59.3567	-57.373	-54.3823	-36.2244							67.05	-57.8308	-55.9692	-52.4597	-72.5403					67.05	-50.9338	-49.9878	-49.4995	-38.6353							67	0.072662	-3.16075	2.8701	-20.1489	-293.768	-674.765	-830.441
67.1	-61.1572	-59.082	-57.312	-54.3213	-35.614							67.1	-57.7087	-55.9387	-52.6428	-72.2656					67.1	-51.1475	-50.3235	-49.8657	-38.3301							67.05	3.12442	-2.24522	5.00633	-21.6747	-292.242	-672.629	-827.39
67.15	-61.3098	-59.3262	-57.4036	-54.4128	-34.6069							67.15	-57.7393	-55.8472	-53.1006	-71.5027					67.15	-51.0864	-50.2014	-49.8047	-37.9333							67.1	2.81924	-2.5504	8.05809	-23.2006	-288.885	-671.409	-833.798
67.2	-61.2793	-59.3872	-57.5561	-54.5959	-33.3862							67.2	-57.9529	-55.7251	-53.0701	-70.7397					67.2	-51.0559	-50.0793	-49.8047	-37.7808							67.15	4.34512	-2.24522	8.97362	-19.5385	-289.496	-670.493	-833.798
67.25	-61.1877	-59.3872	-57.6477	-54.5959	-32.3486							67.25	-57.8918	-56.0913	-53.1616	-70.0989					67.25	-51.0559	-50.4761	-49.7131	-37.5977							67.2	4.03995	-1.63487	5.92186	-22.5903	-291.021	-667.441	-833.493
67.3	-61.1877	-59.1736	-57.6172	-54.4434	-30.8533							67.3	-57.8003	-56.1829	-53.3142	-69.7327					67.3	-50.9644	-50.3845	-50.0183	-37.2925							67.25	3.12442	-1.02452	4.0908	-22.8954	-288.275	-667.441	-837.766
67.35	-61.3403	-59.4177	-57.5561	-54.7485	-28.9307							67.35	-57.8003	-56.1218	-53.6804	-69.1223					67.35	-50.7507	-50.1404	-50.1404	-36.7126							67.3	1.59854	0.196182	4.0908	-21.6747	-284.308	-670.188	-837.155
67.4	-61.0962	-59.4177	-57.4036	-54.6265	-26.886							67.4	-57.6782	-56.0608	-53.7109	-68.4509					67.4	-50.8728	-50.5981	-50.0793	-36.3159							67.35	0.377838	1.41688	5.00633	-21.9799	-282.782	-671.409	-838.986
67.45	-61.1572	-59.3262	-57.7087	-54.5044	-24.3225							67.45	-58.0139	-56.3354	-53.7109	-67.7795					67.45	-51.0254	-50.4761	-49.8657	-35.7056							67.4	0.98819	2.02724	5.31151	-23.2006	-285.223	-671.409	-842.954
67.5	-61.2793	-59.3567	-57.8613	-54.9316	-20.874							67.5	-57.8613	-56.3965	-53.894	-67.5964					67.5	-51.2085	-50.1709	-50.1709	-35.0037							67.45	1.29337	0.501358	6.22704	-19.5385	-283.087	-669.883	-841.123
67.55	-61.0352	-59.4482	-57.8003	-54.9927	-16.7236							67.55	-57.9224	-56.366	-54.3823	-66.925					67.55	-51.0559	-50.415	-50.415	-34.2712							67.5	3.12442	0.501358	8.05809	-19.8437	-280.035	-668.967	-841.123
[truncated: 8,970 more rows]

## Sheet: Fig. 1 supplement 4c
Independent Variable	Boltzmann Fit of Sheet1 B	Independent Variable	Regular Residual of Sheet1 B	Regular Residual of Sheet1 B	Fitted Y	Regular Residual of Sheet1 B	Regular Residual of Sheet1 B	Percentiles	Reference X	Reference Line				Displacement response Curve fitted with a Boltzmann function.							0	0.00017	0
[truncated: 1,001 more rows]

[truncated: 1 more sheets: Fig. 1 supplement 4d]
