# Supplementary material for: Intrinsic mechanical sensitivity of mammalian auditory neurons as a contributor to sound-driven neural activity
Source: eLife. 2022 Mar 10;11:e74948. doi: 10.7554/eLife.74948 (PMC8942473; doi:10.7554/eLife.74948)
Supplement: Figure 1—figure supplement 5—source data 1. [file elife-74948-fig1-figsupp5-data1.xls]

## Sheet: Fig.1 supl 5a
Time	MP	MP	MP	MP	MP	MP	MP		MP = membrane potential (mV)						Inset	Time	I (pa)	0	0		Figure 1- figure supplement 5
0.05	-54.4128	-54.0161	-54.657	-55.0842	-54.4739	-55.4504	-54.3823									0.05	1.50575	250	0		Mechanical sensitivity of mouse vestibular ganglion neurons.
0.1	-54.1687	-54.0771	-54.8706	-55.2673	-54.5959	-55.2063	-54.2602									0.1	1.72769
0.15	-54.4128	-53.9856	-54.8096	-55.2368	-54.5959	-55.5725	-54.1382									0.15	1.89415
0.2	-54.3823	-53.6804	-54.5044	-55.0537	-54.5959	-55.2978	-54.4434									0.2	1.61672
0.25	-54.1077	-53.9551	-54.9011	-55.2368	-54.4434	-55.3284	-54.3518									0.25	1.72769
0.3	-54.4739	-54.1077	-54.8706	-55.2978	-54.3823	-55.481	-54.1992									0.3	1.45026
0.35	-54.3823	-53.9856	-54.4739	-55.1758	-54.5654	-55.2368	-54.1382									0.35	0.562478
0.4	-54.0771	-53.8025	-54.8096	-54.9927	-54.5959	-55.542	-54.2908									0.4	1.00637
0.45	-54.4739	-53.833	-54.8706	-55.2673	-54.6265	-55.4199	-54.4434									0.45	0.285045
0.5	-54.3823	-54.0161	-54.657	-55.2673	-54.1992	-55.1453	-54.3213									0.5	0.562478
0.55	-54.1382	-53.9246	-54.9011	-55.1758	-54.5349	-55.4199	-54.3213									0.55	0.285045
0.6	-54.4434	-53.7415	-54.8401	-55.0232	-54.6875	-55.4504	-54.2297									0.6	0.728937
0.65	-54.4128	-54.0466	-54.779	-55.3589	-54.4434	-55.1453	-54.4128									0.65	0.562478
0.7	-54.2602	-53.9551	-54.8096	-55.2978	-54.5959	-55.5115	-54.3518									0.7	0.950883
0.75	-54.3823	-53.6194	-54.8706	-55.2673	-54.6265	-55.3284	-54.3823									0.75	0.451505
0.8	-54.3823	-54.0161	-54.8096	-55.0232	-54.4434	-55.1758	-54.1992									0.8	0.617964
0.85	-54.3823	-53.8635	-54.657	-55.4199	-54.718	-55.4199	-54.1382									0.85	0.673451
0.9	-54.4434	-53.8635	-55.0232	-55.2368	-54.6875	-55.2978	-54.3823									0.9	0.784424
0.95	-54.4128	-53.9856	-54.779	-55.2368	-54.3823	-55.2368	-54.2908									0.95	0.728937
1	-54.2908	-53.6499	-54.5959	-55.0842	-54.6265	-55.3894	-54.2602									1	0.174072
1.05	-54.3213	-53.9551	-54.9011	-55.3589	-54.4434	-55.2673	-54.0161									1.05	0.396018
1.1	-54.4739	-53.7109	-54.9011	-55.2978	-54.657	-55.2673	-54.1687									1.1	0.451505
1.15	-54.4128	-53.9856	-54.5959	-55.2063	-54.5044	-55.3589	-54.3213									1.15	0.562478
1.2	-54.1687	-53.8635	-54.8096	-54.9927	-54.5349	-55.2368	-54.2602									1.2	0.340532
1.25	-54.4434	-53.9246	-54.9011	-55.2368	-54.5654	-55.2978	-54.1992									1.25	0.340532
1.3	-54.4128	-53.894	-54.8096	-55.3589	-54.4128	-55.3589	-54.0466									1.3	0.617964
1.35	-54.1687	-53.9246	-54.6875	-55.2063	-54.5349	-55.1758	-54.2297									1.35	0.451505
1.4	-54.4434	-53.9856	-54.8096	-54.9622	-54.1687	-55.2673	-54.3518									1.4	0.451505
1.45	-54.3518	-53.7415	-54.718	-55.2368	-54.6265	-55.3589	-54.1992									1.45	0.007613
1.5	-54.3823	-53.9551	-54.5349	-55.3284	-54.4128	-55.1453	-54.0161									1.5	-0.658225
1.55	-54.3518	-53.6804	-54.8401	-55.3284	-54.5959	-55.1453	-54.3213									1.55	-0.769198
1.6	-54.4739	-53.8635	-54.8096	-55.1758	-54.4739	-55.3284	-54.3518									1.6	-1.21309
1.65	-54.4434	-53.5583	-54.718	-55.1147	-54.5349	-55.2368	-53.9856									1.65	-1.21309
1.7	-54.2908	-53.8635	-54.718	-55.4199	-54.5349	-55.2063	-54.2602									1.7	-1.43504
1.75	-54.5959	-53.6194	-54.9316	-55.3589	-54.2602	-55.2978	-54.2908									1.75	-1.04663
1.8	-54.4128	-53.9246	-54.8706	-55.3894	-54.5654	-55.1453	-54.1382									1.8	-0.658225
1.85	-54.2297	-53.8025	-54.6265	-55.2063	-54.4128	-55.0842	-54.3518									1.85	-0.491766
1.9	-54.4739	-53.8025	-54.8096	-55.3284	-54.657	-55.3589	-54.0771									1.9	-0.658225
1.95	-54.5959	-53.894	-54.8706	-55.4199	-54.5654	-55.1453	-54.2602									1.95	-0.491766
2	-54.3823	-53.6804	-54.7485	-55.3589	-54.3213	-54.9927	-54.2297									2	-0.26982
2.05	-54.1992	-53.9551	-54.5959	-55.2368	-54.6875	-55.2978	-54.2297									2.05	-0.26982
2.1	-54.5349	-53.6499	-54.9011	-55.0537	-54.4128	-55.2063	-54.2908									2.1	-0.713712
2.15	-54.5349	-53.9856	-54.9011	-55.3284	-54.5349	-54.9011	-54.0466									2.15	-0.658225
2.2	-54.1992	-53.894	-54.8401	-55.3589	-54.5654	-55.3284	-54.2602									2.2	-1.04663
2.25	-54.3823	-53.8025	-54.6265	-55.2978	-54.2602	-55.2673	-53.9856									2.25	-0.991144
2.3	-54.4434	-53.9246	-54.8401	-55.2063	-54.5654	-55.0232	-54.2908									2.3	-1.26858
2.35	-54.3823	-53.6194	-54.8096	-55.2368	-54.4739	-55.1758	-53.9246									2.35	-0.991144
2.4	-54.1382	-53.9856	-54.6875	-55.4504	-54.2908	-55.2978	-54.2297									2.4	-0.713712
2.45	-54.4739	-54.0466	-54.718	-55.2978	-54.5654	-55.1453	-54.0466									2.45	-1.10212
2.5	-54.4434	-53.6194	-54.8706	-55.2063	-54.3518	-55.1758	-54.2908									2.5	-1.43504
2.55	-54.4434	-53.9856	-54.8401	-55.3894	-54.4128	-55.2673	-54.1687									2.55	-1.76795
2.6	-54.3213	-53.7415	-54.6875	-55.4504	-54.5044	-55.1453	-54.3518									2.6	-1.6015
2.65	-54.6265	-53.833	-54.7485	-55.2673	-54.2908	-54.9622	-54.2602									2.65	-1.87893
2.7	-54.5044	-53.9856	-54.8096	-55.481	-54.5044	-55.2978	-54.3213									2.7	-1.93441
2.75	-54.4739	-53.6804	-54.9622	-55.4504	-54.5044	-55.2063	-54.2908									2.75	-2.26733
2.8	-54.4434	-53.8635	-54.6875	-55.0842	-54.2602	-55.0842	-54.1382									2.8	-2.76671
2.85	-54.5654	-53.894	-54.7485	-55.481	-54.5349	-55.0842	-54.3213									2.85	-2.26733
2.9	-54.5349	-53.7109	-54.9316	-55.2978	-54.5349	-55.2063	-54.0466									2.9	-2.76671
2.95	-54.4434	-53.9551	-54.8706	-55.481	-54.2602	-55.1758	-54.2908									2.95	-2.8222
3	-54.5044	-53.894	-54.718	-55.4199	-54.4434	-54.9316	-54.0466									3	-3.15512
3.05	-54.6265	-53.9246	-54.718	-55.1758	-54.5654	-55.2063	-54.2602									3.05	-3.70998
3.1	-54.5349	-53.9551	-54.8706	-55.3894	-54.2602	-55.2673	-54.2297									3.1	-3.59901
3.15	-54.3823	-53.6804	-54.9622	-55.1453	-54.5959	-55.0537	-54.0466									3.15	-3.87644
3.2	-54.4128	-53.9551	-54.779	-55.4199	-54.5654	-55.1147	-54.2297									3.2	-3.87644
3.25	-54.5959	-53.9856	-54.6265	-55.1147	-54.1687	-55.2368	-53.9856									3.25	-3.93193
3.3	-54.5349	-53.7415	-54.8706	-55.3894	-54.5044	-55.2978	-54.2297									3.3	-4.0429
3.35	-54.3518	-54.0161	-54.8401	-55.1147	-54.5349	-55.0537	-54.2297									3.35	-3.82096
3.4	-54.4739	-53.9246	-54.8096	-55.4504	-54.1687	-55.2673	-53.9856									3.4	-4.20936
3.45	-54.657	-53.7415	-54.6265	-55.1453	-54.5044	-55.2368	-54.1992									3.45	-4.20936
3.5	-54.5959	-54.0771	-54.779	-55.3894	-54.4128	-55.2063	-54.1687									3.5	-4.15388
3.55	-54.3518	-53.894	-54.8096	-55.3284	-54.1992	-55.0537	-54.1992									3.55	-3.98742
3.6	-54.4128	-53.6804	-54.8096	-55.4199	-54.4434	-55.2368	-54.2908									3.6	-3.82096
3.65	-54.657	-54.0161	-54.657	-55.3284	-54.5044	-55.2673	-53.9856									3.65	-3.76547
3.7	-54.5654	-53.894	-54.718	-55.4504	-54.2602	-55.1758	-54.3823									3.7	-3.59901
3.75	-54.5654	-53.833	-54.8706	-55.481	-54.5044	-55.1147	-54.2908									3.75	-2.87769
3.8	-54.3823	-54.0161	-54.8401	-55.4504	-54.5044	-55.2978	-54.0771									3.8	-2.32282
3.85	-54.6875	-53.8635	-54.8401	-55.4504	-54.2602	-55.2368	-54.3213									3.85	-2.15636
3.9	-54.6265	-53.833	-54.5959	-55.1453	-54.3213	-54.9927	-54.1077									3.9	-1.76795
3.95	-54.5654	-53.9551	-54.8706	-55.5115	-54.5654	-55.1147	-54.3213									3.95	-1.87893
4	-54.4128	-53.8635	-55.0232	-55.2063	-54.4434	-55.2673	-54.2908									4	-1.93441
4.05	-54.5044	-53.772	-54.9927	-55.5115	-54.1992	-55.2673	-53.9246									4.05	-1.21309
4.1	-54.657	-54.1077	-54.779	-55.2673	-54.4739	-54.9927	-54.3518									4.1	-0.824685
4.15	-54.5654	-53.9551	-54.718	-55.3589	-54.4128	-55.1758	-54.2602									4.15	-0.380793
4.2	-54.5044	-53.8025	-54.9316	-55.3894	-54.2602	-55.3284	-54.0466									4.2	0.562478
4.25	-54.1687	-54.1077	-55.0842	-55.1453	-54.4739	-55.2673	-54.2908									4.25	0.617964
4.3	-54.5349	-54.0771	-54.9011	-55.2978	-54.4434	-54.9622	-54.1382									4.3	1.45026
4.35	-54.5959	-53.9551	-54.7485	-55.2368	-54.1382	-55.2063	-54.1382									4.35	1.39478
4.4	-54.5044	-54.1077	-54.6875	-55.3894	-54.4128	-55.3894	-54.2297									4.4	2.5045
4.45	-54.4434	-53.9246	-54.9316	-55.3894	-54.4128	-55.2063	-54.0771									4.45	2.9484
4.5	-54.3213	-53.772	-54.9622	-55.1147	-54.2602	-55.1453	-54.1992									4.5	3.22583
4.55	-54.6265	-54.1077	-54.8096	-55.3589	-54.1992	-55.0842	-54.3823									4.55	2.89291
4.6	-54.657	-54.0466	-54.8401	-55.3894	-54.4739	-55.3284	-54.1077									4.6	2.89291
4.65	-54.657	-53.6499	-54.657	-55.3589	-54.3823	-55.1758	-54.2602									4.65	3.55875
4.7	-54.5044	-54.0161	-54.9011	-55.4199	-54.0466	-55.0842	-54.1687									4.7	2.5045
4.75	-54.3518	-53.9856	-54.9622	-55.1453	-54.3823	-54.9316	-54.0771									4.75	2.83743
4.8	-54.6265	-53.7109	-54.8706	-55.5115	-54.4434	-55.2368	-54.2602									4.8	2.55999
4.85	-54.718	-54.0466	-54.8706	-55.481	-54.1992	-55.2368	-54.2297									4.85	2.06061
4.9	-54.657	-53.9551	-54.657	-55.1758	-54.2297	-55.1147	-53.9551									4.9	2.1161
4.95	-54.4128	-53.8635	-54.9927	-55.4199	-54.4434	-54.8706	-54.2908									4.95	1.78318
5	-54.3518	-53.894	-54.9316	-55.2978	-54.4128	-55.0842	-54.2602									5	1.17283
5.05	-54.6265	-54.1077	-54.9316	-55.3589	-54.1992	-55.1758	-53.9246									5.05	0.950883
5.1	-54.657	-53.9246	-54.8401	-55.4199	-54.3518	-55.1453	-54.1687									5.1	0.728937
5.15	-54.5349	-53.894	-54.9927	-55.0537	-54.3518	-55.0232	-54.1992									5.15	0.396018
5.2	-54.5044	-54.1077	-55.0232	-55.3894	-54.2908	-54.9316	-53.9246									5.2	0.396018
5.25	-54.3823	-54.0466	-54.8096	-55.3284	-54.1687	-55.1758	-54.2297									5.25	0.063099
5.3	-54.5044	-53.6499	-55.2063	-55.1147	-54.3823	-55.1453	-54.1382									5.3	-0.491766
5.35	-54.6265	-54.1077	-54.9011	-55.4199	-54.3213	-55.2063	-53.9551									5.35	-0.325306
5.4	-54.5959	-54.0466	-54.9011	-55.2368	-54.2908	-54.9316	-54.1992									5.4	-0.10336
5.45	-54.5044	-53.772	-55.0842	-55.3284	-54.1992	-55.0842	-54.1992									5.45	-0.769198
5.5	-54.4434	-53.833	-54.718	-55.3284	-54.4128	-55.1453	-53.9551									5.5	-0.214333
5.55	-54.3823	-53.9856	-55.0232	-55.1758	-54.3518	-55.1147	-54.1382									5.55	-0.436279
5.6	-54.6875	-53.9551	-54.8706	-55.3284	-54.0771	-55.1453	-54.2908									5.6	-0.047874
5.65	-54.5349	-53.6499	-54.9316	-55.4504	-54.2908	-54.9011	-54.1077									5.65	-0.880171
5.7	-54.5959	-53.894	-55.0232	-55.1147	-54.3823	-55.0537	-54.1077									5.7	-0.547252
5.75	-54.3518	-53.9551	-54.7485	-55.4199	-54.3823	-55.2063	-54.1687									5.75	-0.713712
5.8	-54.6265	-53.772	-55.0232	-55.3284	-54.0771	-55.1147	-54.1382									5.8	-0.325306
5.85	-54.6265	-53.894	-54.657	-55.0537	-54.4434	-55.1147	-54.1077									5.85	-0.158847
5.9	-54.3823	-53.9551	-55.0842	-55.4504	-54.4128	-54.9316	-54.1687									5.9	0.728937
5.95	-54.5959	-53.894	-54.7485	-55.2673	-54.3823	-54.9927	-54.1382									5.95	0.285045
6	-54.5959	-53.6804	-55.1147	-55.0842	-54.1992	-55.0842	-53.9246									6	0.506991
6.05	-54.2908	-53.9246	-54.9316	-55.3894	-54.4434	-55.1453	-54.2602									6.05	1.11734
6.1	-54.5959	-53.9551	-55.0842	-55.2673	-54.4739	-55.0537	-54.2297									6.1	0.617964
6.15	-54.5349	-53.833	-55.0537	-55.1453	-54.3823	-54.9011	-53.833									6.15	0.83991
6.2	-54.4128	-53.8025	-55.0232	-55.3589	-54.1382	-55.0232	-54.1382									6.2	1.11734
6.25	-54.5044	-54.0466	-55.0842	-55.2063	-54.4739	-55.2673	-54.1077									6.25	0.617964
6.3	-54.2297	-53.9551	-54.9011	-55.1453	-54.5654	-55.1758	-54.0466									6.3	0.617964
6.35	-54.5349	-53.8025	-55.0842	-55.3589	-54.4434	-54.9927	-53.9856									6.35	0.174072
6.4	-54.4128	-53.8635	-54.779	-55.2368	-54.2297	-55.0232	-54.1382									6.4	0.229559
6.45	-54.5044	-54.0771	-55.1147	-55.1453	-54.4434	-55.2368	-54.0771									6.45	0.506991
6.5	-54.5349	-53.9246	-54.9316	-55.3894	-54.5044	-55.1453	-53.9246									6.5	0.784424
6.55	-54.4434	-53.772	-54.9927	-55.2063	-54.4739	-54.9316	-54.1992									6.55	0.285045
6.6	-54.5654	-53.9246	-55.0232	-55.1147	-54.2908	-55.1758	-54.1382									6.6	0.340532
6.65	-54.2602	-53.9856	-54.718	-55.3894	-54.2602	-55.0842	-54.0161									6.65	0.285045
6.7	-54.5654	-53.8635	-54.9622	-55.4199	-54.5044	-55.0842	-54.0771									6.7	0.340532
6.75	-54.4128	-53.6804	-54.9316	-55.1453	-54.4739	-55.1453	-54.1382									6.75	0.229559
6.8	-54.6875	-53.8635	-55.0232	-55.3894	-54.4128	-54.779	-54.0161									6.8	0.285045
6.85	-54.3823	-53.9856	-55.0842	-55.3589	-54.1382	-55.1147	-53.9246									6.85	0.950883
6.9	-54.6265	-53.9551	-54.779	-55.0537	-54.4128	-54.9927	-54.1687									6.9	0.784424
6.95	-54.5959	-53.6499	-55.2368	-55.4199	-54.5654	-55.1147	-54.0466									6.95	1.11734
7	-54.4739	-53.894	-55.0232	-55.3284	-54.5044	-55.0232	-53.9246									7	1.00637
7.05	-54.5654	-54.0466	-54.9316	-55.0537	-54.3213	-54.9927	-54.0466									7.05	0.784424
7.1	-54.2908	-54.0466	-55.0842	-55.4199	-54.4128	-55.0842	-54.1382									7.1	0.617964
7.15	-54.5959	-53.7415	-54.9011	-55.3589	-54.6265	-54.779	-54.1077									7.15	0.617964
7.2	-54.3823	-53.8025	-55.1758	-55.0232	-54.5044	-55.0537	-53.7415									7.2	0.174072
7.25	-54.5654	-54.0466	-55.1147	-55.3589	-54.4739	-54.6875	-54.0161									7.25	-0.380793
7.3	-54.5959	-54.0161	-54.718	-55.3894	-54.2908	-55.1147	-53.9856									7.3	-0.158847
7.35	-54.1992	-53.833	-55.1453	-55.2673	-54.4434	-54.8401	-54.0161									7.35	-0.491766
7.4	-54.6265	-53.8635	-55.0537	-55.2063	-54.4739	-55.0537	-53.833									7.4	-0.824685
7.45	-54.5044	-54.0771	-54.8706	-55.3894	-54.4128	-54.9316	-54.0771									7.45	-0.880171
7.5	-54.4739	-53.9856	-55.0537	-55.3284	-54.3823	-55.1147	-54.0161									7.5	-1.21309
7.55	-54.4739	-53.833	-54.9316	-55.1453	-54.2602	-55.0842	-53.9551									7.55	-0.991144
7.6	-54.3823	-53.6804	-54.9316	-55.4199	-54.4128	-54.8706	-53.8635									7.6	-1.26858
7.65	-54.6265	-53.9856	-55.0537	-55.3894	-54.5349	-54.9927	-54.1077									7.65	-1.6015
7.7	-54.5654	-53.9856	-54.8706	-55.1147	-54.5044	-54.779	-54.1382									7.7	-1.76795
7.75	-54.3213	-53.9551	-54.9927	-55.3894	-54.4434	-55.0537	-53.9856									7.75	-1.54601
7.8	-54.6875	-53.7109	-55.1147	-55.481	-54.1992	-54.8706	-53.772									7.8	-1.93441
7.85	-54.5044	-53.7109	-54.779	-55.2978	-54.3518	-55.0232	-54.1687									7.85	-1.76795
7.9	-54.4739	-53.9856	-55.0232	-55.2063	-54.5044	-54.9622	-54.1382									7.9	-1.71247
7.95	-54.6265	-53.9856	-55.0842	-55.603	-54.5349	-54.8706	-54.0161									7.95	-1.82344
8	-54.5044	-53.8635	-54.8706	-55.542	-54.4434	-55.0842	-53.8635									8	-1.6015
8.05	-54.6265	-53.5278	-55.1758	-55.1758	-54.2297	-54.8706	-54.1382									8.05	-1.6015
8.1	-54.5349	-53.8635	-54.9927	-55.3284	-54.2908	-54.9927	-54.1077									8.1	-1.10212
8.15	-54.2908	-54.0466	-54.779	-55.481	-54.6265	-55.0842	-54.0466									8.15	-0.991144
8.2	-54.5959	-53.894	-55.0842	-55.3284	-54.5349	-54.718	-53.833									8.2	-1.26858
8.25	-54.5959	-53.833	-55.1147	-55.2063	-54.4739	-55.0232	-54.0771									8.25	-1.6015
8.3	-54.2602	-53.6499	-54.7485	-55.4504	-54.3213	-54.9316	-54.0466									8.3	-1.32406
8.35	-54.5959	-53.9246	-55.0842	-55.3589	-54.1992	-55.0537	-53.9246									8.35	-1.37955
8.4	-54.5044	-53.9551	-55.0842	-55.2673	-54.4434	-54.9622	-53.8025									8.4	-0.991144
8.45	-54.3213	-53.9856	-54.718	-55.3589	-54.4434	-54.718	-54.0466									8.45	-0.602739
8.5	-54.5654	-53.894	-55.1453	-55.5115	-54.4434	-55.0232	-54.0161									8.5	-0.047874
8.55	-54.5959	-53.6804	-55.0232	-55.5115	-54.5044	-55.0232	-53.9856									8.55	0.174072
8.6	-54.2297	-53.8635	-54.7485	-55.2673	-54.3213	-54.779	-53.772									8.6	0.950883
8.65	-54.718	-54.0161	-55.0537	-55.4504	-54.2602	-54.9622	-53.894									8.65	0.784424
8.7	-54.5959	-53.9551	-55.0232	-55.4504	-54.4739	-54.9316	-54.1382									8.7	1.61672
8.75	-54.3213	-53.772	-54.779	-55.4504	-54.4128	-54.8401	-54.0771									8.75	1.89415
8.8	-54.5654	-53.8635	-55.0232	-55.1453	-54.4434	-54.9927	-53.9246									8.8	1.78318
8.85	-54.657	-53.9551	-55.0842	-55.5725	-54.1992	-54.8706	-53.7415									8.85	1.94964
8.9	-54.3823	-53.894	-54.779	-55.3894	-54.4739	-54.8706	-54.0466									8.9	1.89415
8.95	-54.6265	-53.6499	-54.9927	-55.4199	-54.4128	-54.8706	-54.0771									8.95	1.67221
9	-54.5654	-54.1077	-55.0842	-55.2978	-54.3213	-54.6875	-54.2602									9	1.67221
9.05	-54.3213	-53.894	-54.9316	-55.5115	-54.4739	-54.8706	-53.833									9.05	1.33929
9.1	-54.6265	-53.6499	-54.9622	-55.3894	-54.4739	-54.9316	-53.894									9.1	1.50575
9.15	-54.5654	-53.9551	-55.0537	-55.3284	-54.2297	-54.6875	-54.1687									9.15	1.00637
9.2	-54.1992	-53.8025	-55.0232	-55.1453	-54.5349	-55.0232	-54.0466									9.2	1.11734
9.25	-54.5349	-53.9856	-54.9011	-55.4504	-54.5044	-54.8401	-53.9246									9.25	0.174072
9.3	-54.4739	-53.894	-55.1147	-55.4199	-54.2908	-54.6875	-53.7415									9.3	0.83991
9.35	-54.3823	-53.8635	-55.0232	-55.2978	-54.4434	-54.9622	-53.9856									9.35	0.340532
9.4	-54.4739	-53.9551	-54.657	-55.0842	-54.1687	-54.9622	-54.1687									9.4	0.229559
9.45	-54.4434	-53.7109	-55.1147	-55.5115	-54.5349	-54.6875	-54.0161									9.45	0.007613
9.5	-54.3823	-54.0466	-55.0842	-55.4199	-54.3823	-54.8706	-53.894									9.5	0.340532
9.55	-54.3518	-53.7109	-54.9011	-55.3894	-54.4128	-54.9011	-53.6804									9.55	0.506991
9.6	-54.6265	-54.1382	-54.9622	-55.1453	-54.3823	-54.5349	-53.9856									9.6	0.728937
9.65	-54.5044	-53.8025	-54.9622	-55.5115	-54.2908	-54.9927	-54.0771									9.65	0.451505
9.7	-54.3518	-54.0466	-54.9927	-55.481	-54.4128	-54.8706	-54.0771									9.7	0.451505
9.75	-54.5959	-53.8635	-54.8096	-55.4504	-54.1382	-54.5959	-53.7109									9.75	0.617964
9.8	-54.5349	-54.0771	-55.1147	-55.2368	-54.4434	-54.9011	-54.0771									9.8	0.118586
9.85	-54.3213	-53.9246	-55.0537	-55.4199	-54.2297	-54.9011	-54.0771									9.85	0.063099
9.9	-54.5959	-53.9856	-54.8706	-55.603	-54.4128	-54.6875	-53.9551									9.9	0.007613
9.95	-54.5654	-53.9856	-55.0537	-55.481	-54.3213	-54.8096	-54.0161									9.95	0.506991
10	-54.4434	-53.8635	-55.1147	-55.3589	-54.4128	-54.8401	-54.1382									10	0.950883
10.05	-54.4434	-54.0466	-55.0232	-55.3589	-54.4739	-54.6265	-54.0466									10.05	1.22832
10.1	-54.657	-53.7109	-55.0232	-55.5115	-54.1687	-54.779	-53.9856									10.1	1.94964
10.15	-54.5349	-53.9856	-55.2063	-55.4504	-54.4434	-54.8401	-54.0771									10.15	1.94964
10.2	-54.3213	-53.7415	-55.0232	-55.3589	-54.2297	-54.718	-53.7415									10.2	2.33805
10.25	-54.5654	-54.0161	-54.8401	-55.1758	-54.4739	-54.8706	-54.1077									10.25	2.5045
10.3	-54.5349	-53.9551	-55.1453	-55.3284	-54.5349	-54.9316	-53.9551									10.3	2.33805
10.35	-54.4128	-53.9551	-55.1147	-55.5115	-54.1992	-54.7485	-54.1077									10.35	2.61548
10.4	-54.3823	-54.0771	-55.0537	-55.3589	-54.4128	-54.6265	-54.0466									10.4	3.22583
10.45	-54.6265	-53.772	-54.779	-55.2368	-54.4128	-54.9622	-54.0771									10.45	2.9484
10.5	-54.4434	-54.0466	-55.0842	-55.1453	-54.2908	-54.9316	-54.1077									10.5	3.83618
10.55	-54.3213	-53.8635	-55.0537	-55.4199	-54.4128	-54.5044	-53.9856									10.55	3.72521
10.6	-54.5959	-54.1687	-55.0537	-55.481	-54.1687	-54.8401	-54.1077									10.6	4.11361
10.65	-54.6265	-54.0771	-54.8706	-55.4199	-54.4434	-54.8401	-53.8635									10.65	4.1691
10.7	-54.4739	-53.7415	-55.1147	-55.2063	-54.3823	-54.6265	-54.0771									10.7	3.61424
10.75	-54.4434	-54.0466	-55.1758	-55.4199	-54.1992	-54.6875	-53.8635									10.75	3.50326
10.8	-54.6875	-53.9246	-55.0232	-55.4504	-54.5044	-54.7485	-54.1992									10.8	2.72645
10.85	-54.6265	-54.1077	-54.9622	-55.3589	-54.3518	-54.718	-53.894									10.85	2.17159
10.9	-54.3213	-54.0161	-55.2368	-55.2978	-54.3213	-54.5654	-54.1992									10.9	2.44902
10.95	-54.5044	-53.6804	-55.1758	-55.542	-54.4434	-54.779	-53.9246									10.95	2.28256
11	-54.6265	-54.0771	-55.1453	-55.3589	-54.4434	-54.718	-54.1382									11	2.17159
11.05	-54.5654	-53.9856	-55.0537	-55.2368	-54.3518	-54.4128	-54.0771									11.05	2.00513
11.1	-54.2297	-53.9551	-55.3284	-55.481	-54.5654	-54.718	-54.1687									11.1	2.39353
11.15	-54.6265	-53.9856	-55.2063	-55.2063	-54.4128	-54.718	-54.1382									11.15	2.72645
11.2	-54.5654	-53.772	-55.0842	-55.481	-54.3823	-54.5654	-53.9246									11.2	1.72769
11.25	-54.5349	-54.0771	-55.0232	-55.3589	-54.4739	-54.5044	-54.0771									11.25	1.67221
11.3	-54.2602	-54.0771	-55.1758	-55.2978	-54.4128	-54.8401	-53.7415									11.3	1.00637
11.35	-54.4739	-53.7415	-55.2673	-55.4504	-54.5044	-54.6875	-54.1687									11.35	0.673451
11.4	-54.4434	-54.0161	-55.0842	-55.1453	-54.4434	-54.4434	-53.894									11.4	0.174072
11.45	-54.4128	-53.9856	-55.0232	-55.3894	-54.2908	-54.6875	-54.0771									11.45	-0.547252
11.5	-54.2297	-53.894	-55.1453	-55.0232	-54.4128	-54.718	-54.1687									11.5	-0.713712
11.55	-54.4434	-54.0771	-55.1453	-55.3894	-54.4739	-54.6875	-53.894									11.55	-0.769198
11.6	-54.5654	-53.9856	-55.0537	-55.1453	-54.3823	-54.3823	-54.0771									11.6	-0.991144
11.65	-54.4739	-53.9246	-54.9011	-55.4504	-54.3213	-54.6875	-53.894									11.65	-1.32406
11.7	-54.2602	-54.0771	-55.2063	-55.2063	-54.3823	-54.657	-54.2297									11.7	-1.65698
11.75	-54.5349	-53.833	-55.1758	-55.542	-54.3213	-54.5349	-54.1382									11.75	-1.6015
11.8	-54.657	-53.9856	-55.1147	-55.2368	-54.3213	-54.4434	-53.894									11.8	-1.87893
11.85	-54.5654	-53.9856	-54.8706	-55.3894	-54.4128	-54.657	-54.1077									11.85	-2.10087
11.9	-54.3213	-53.7415	-55.1147	-55.3589	-54.3823	-54.657	-53.9856									11.9	-1.65698
11.95	-54.4434	-54.0771	-55.2063	-55.481	-54.3518	-54.4434	-54.1382									11.95	-1.54601
12	-54.6265	-54.0466	-55.2368	-55.4199	-54.5349	-54.5654	-54.0771									12	-1.82344
12.05	-54.5959	-53.6804	-55.0537	-55.2673	-54.4434	-54.5959	-53.772									12.05	-1.21309
12.1	-54.3518	-54.0771	-54.9622	-55.481	-54.2908	-54.5654	-54.1382									12.1	-0.602739
12.15	-54.2908	-54.0771	-55.2368	-55.2063	-54.5959	-54.3213	-54.1382									12.15	-0.10336
12.2	-54.657	-53.7109	-55.2368	-55.4504	-54.6265	-54.5654	-53.833									12.2	0.617964
12.25	-54.5044	-54.0771	-55.2368	-55.1758	-54.1687	-54.5654	-54.0161									12.25	0.562478
12.3	-54.4434	-54.1077	-54.9011	-55.4504	-54.4739	-54.5654	-53.833									12.3	0.673451
12.35	-54.1687	-53.833	-55.0537	-55.3894	-54.5959	-54.2602	-53.9856									12.35	1.06186
12.4	-54.4434	-54.1077	-55.2978	-55.3894	-54.3518	-54.4434	-54.0161									12.4	0.895397
12.45	-54.5044	-54.0466	-55.2063	-55.481	-54.3823	-54.6265	-53.7415									12.45	1.61672
12.5	-54.5044	-53.8025	-55.1147	-55.0537	-54.3823	-54.5654	-54.0466									12.5	1.45026
12.55	-54.2602	-54.1077	-54.7485	-55.4504	-54.3213	-54.2908	-54.0466									12.55	2.06061
12.6	-54.3213	-53.9856	-55.1147	-55.2063	-54.2602	-54.5959	-53.6499									12.6	2.22707
12.65	-54.657	-53.7109	-55.1758	-55.3894	-54.5349	-54.5959	-53.9856									12.65	2.00513
12.7	-54.5349	-54.0466	-55.2063	-55.3589	-54.4128	-54.657	-53.9856									12.7	2.00513
12.75	-54.5044	-54.0771	-55.0232	-55.0537	-54.1077	-54.3213	-53.9246									12.75	2.1161
12.8	-54.1687	-53.7109	-54.9011	-55.5115	-54.4739	-54.3823	-54.0466									12.8	1.72769
12.85	-54.5044	-54.0161	-55.2063	-55.4199	-54.4128	-54.5959	-53.833									12.85	2.00513
12.9	-54.718	-54.0161	-55.2673	-55.2673	-54.2602	-54.5044	-53.9856									12.9	1.67221
12.95	-54.5044	-53.6804	-55.2063	-55.4504	-54.3213	-54.4739	-54.0771									12.95	1.56123
13	-54.4739	-54.0771	-55.0842	-55.3589	-54.5349	-54.3518	-53.9246									13	1.67221
13.05	-54.3213	-54.0161	-54.9927	-55.481	-54.4128	-54.5654	-53.9551									13.05	1.83867
13.1	-54.5654	-53.8635	-55.1758	-55.481	-54.2297	-54.4434	-54.0466									13.1	1.56123
13.15	-54.6265	-53.9246	-55.2368	-55.2063	-54.5044	-54.4739	-53.7415									13.15	1.83867
13.2	-54.5044	-53.9246	-55.2368	-55.6335	-54.4739	-54.3213	-54.0466									13.2	1.33929
13.25	-54.5044	-53.894	-55.1147	-55.603	-54.3518	-54.5349	-53.9856									13.25	1.22832
13.3	-54.2297	-53.8025	-55.0537	-55.2063	-54.2908	-54.5044	-53.6499									13.3	1.06186
13.35	-54.5044	-54.1382	-55.2063	-55.5115	-54.5044	-54.5044	-53.9551									13.35	0.784424
13.4	-54.5654	-54.0161	-55.2368	-55.4199	-54.4739	-54.4434	-53.9246									13.4	0.451505
13.45	-54.5044	-53.6804	-55.0842	-55.3284	-54.1687	-54.2908	-53.6499									13.45	0.285045
13.5	-54.5349	-54.1077	-55.1453	-55.542	-54.4434	-54.5654	-53.9551									13.5	-0.158847
13.55	-54.3213	-54.0771	-55.3284	-55.2978	-54.3823	-54.5349	-53.9246									13.55	-0.325306
13.6	-54.4128	-53.8635	-54.9927	-55.3589	-54.3213	-54.6265	-53.7109									13.6	-0.325306
13.65	-54.5959	-53.9551	-55.0842	-55.4504	-54.1382	-54.2908	-54.0161									13.65	-0.380793
13.7	-54.718	-53.9856	-55.1758	-55.2063	-54.4739	-54.3823	-53.894									13.7	-0.547252
13.75	-54.6265	-53.894	-54.8401	-55.542	-54.3518	-54.5959	-53.6194									13.75	-0.713712
13.8	-54.4128	-53.9246	-55.2063	-55.5115	-54.2602	-54.5349	-53.9551									13.8	-0.935658
13.85	-54.2908	-54.0161	-55.1147	-55.2063	-54.1992	-54.5349	-53.9551									13.85	-0.491766
13.9	-54.657	-53.894	-55.2368	-55.542	-54.4128	-54.2297	-53.6804									13.9	-0.824685
13.95	-54.718	-53.7109	-55.2673	-55.542	-54.3518	-54.3213	-53.9551									13.95	-0.547252
14	-54.6265	-53.9856	-54.9316	-55.1453	-54.1687	-54.4739	-53.9551									14	-0.547252
14.05	-54.4434	-53.9856	-55.1758	-55.6335	-54.1992	-54.4434	-53.833									14.05	-0.325306
14.1	-54.5959	-53.8025	-54.9316	-55.603	-54.4128	-54.4434	-53.894									14.1	-0.380793
14.15	-54.718	-53.833	-55.3284	-55.1758	-54.3518	-54.1992	-53.894									14.15	0.118586
14.2	-54.5044	-54.0771	-54.9316	-55.542	-54.0771	-54.2602	-53.8635									14.2	0.506991
14.25	-54.4739	-53.9856	-55.2978	-55.5115	-54.1992	-54.4739	-53.894									14.25	0.895397
14.3	-54.718	-53.772	-55.1453	-55.2368	-54.4128	-54.4434	-53.9551									14.3	1.39478
14.35	-54.5349	-54.0466	-55.3589	-55.542	-54.2297	-54.4128	-53.8025									14.35	1.83867
14.4	-54.5654	-54.1077	-55.1758	-55.481	-54.1077	-54.2297	-53.6194									14.4	2.28256
14.45	-54.5959	-53.9856	-55.0537	-55.2063	-54.1382	-54.2297	-53.894									14.45	2.33805
14.5	-54.3213	-53.8025	-55.2673	-55.5725	-54.3518	-54.4739	-53.9246									14.5	2.67096
14.55	-54.6875	-54.0771	-54.9927	-55.542	-54.2297	-54.4434	-53.6194									14.55	2.06061
14.6	-54.5349	-54.1077	-55.2063	-55.1453	-54.0771	-54.4128	-53.9246									14.6	2.44902
14.65	-54.6265	-53.9246	-54.8706	-55.5725	-54.0161	-54.2908	-53.9856									14.65	2.06061
14.7	-54.657	-53.9856	-55.2063	-55.5725	-54.2602	-54.4739	-53.6499									14.7	1.00637
14.75	-54.5349	-54.0771	-55.0232	-55.1147	-54.1992	-54.5044	-53.8635									14.75	0.396018
14.8	-54.657	-54.0771	-55.1758	-55.5115	-54.1382	-54.3823	-53.9856									14.8	-0.880171
14.85	-54.4128	-53.8025	-55.1758	-55.5725	-53.894	-54.3823	-53.9551									14.85	-2.37831
14.9	-54.8096	-54.0466	-54.9316	-55.3589	-54.2602	-54.5349	-53.772									14.9	-4.48679
14.95	-54.5959	-54.0466	-55.2978	-55.6335	-54.1992	-54.2908	-53.9856									14.95	-6.0959
15	-54.8096	-54.0466	-54.9622	-55.542	-54.2297	-54.4128	-53.894									15	-8.20439
15.05	-54.5959	-53.8025	-55.3589	-55.2368	-54.0771	-54.4739	-53.7109									15.05	-9.97996
15.1	-54.779	-54.1077	-55.2978	-55.5115	-54.1382	-54.0771	-54.0161									15.1	-11.8665
15.15	-54.718	-54.0771	-55.0842	-55.5115	-54.2908	-54.5044	-53.9551									15.15	-14.7518
15.2	-54.6265	-54.0161	-55.3894	-55.3284	-54.1687	-54.1992	-53.833									15.2	-16.3609
15.25	-54.718	-53.833	-55.1147	-55.3589	-54.1992	-54.4434	-53.8025									15.25	-19.0797
15.3	-54.4128	-54.0771	-55.2978	-55.603	-53.9551	-54.3518	-54.0771									15.3	-21.2437
15.35	-54.7485	-54.1382	-55.2978	-55.481	-54.2908	-54.2908	-53.9856									15.35	-23.9071
15.4	-54.4128	-54.0771	-55.0537	-55.2673	-54.2908	-54.3823	-53.6499									15.4	-26.0156
15.45	-54.8096	-53.8635	-55.2978	-55.542	-54.2297	-54.1992	-53.9246									15.45	-28.5679
15.5	-54.657	-54.1382	-55.2063	-55.5115	-54.0771	-54.5044	-53.9551									15.5	-30.9539
15.55	-54.5349	-54.1077	-55.0842	-55.1758	-53.9856	-54.1687	-53.894									15.55	-33.4507
15.6	-54.6875	-54.0771	-55.2673	-55.5115	-54.2602	-54.4434	-53.7109									15.6	-35.5592
15.65	-54.4434	-53.9246	-55.1147	-55.4504	-54.1992	-54.1382	-53.9856									15.65	-37.2793
15.7	-54.8401	-54.0771	-55.1758	-55.3894	-54.1687	-54.5959	-53.9856									15.7	-39.9427
15.75	-54.657	-54.1077	-55.2368	-55.4199	-53.9856	-54.3823	-53.8025									15.75	-42.8835
15.8	-54.6265	-54.1077	-54.9622	-55.5725	-54.0466	-54.4739	-53.8025									15.8	-46.2126
15.85	-54.7485	-54.0161	-55.2978	-55.5115	-54.1992	-54.4128	-53.9551									15.85	-50.929
15.9	-54.4434	-53.9551	-55.2978	-55.2368	-54.1992	-54.3823	-54.1382									15.9	-56.5886
15.95	-54.718	-54.1382	-54.9622	-55.6335	-54.1992	-54.5349	-53.8025									15.95	-62.9696
16	-54.8401	-53.9551	-55.3589	-55.5725	-54.0466	-54.1077	-53.8635									16	-70.5157
16.05	-54.5349	-53.9551	-55.2978	-55.3284	-53.9551	-54.4128	-54.0161									16.05	-77.3406
16.1	-54.718	-53.833	-55.0537	-55.4199	-54.1382	-54.1077	-53.9856									16.1	-84.5538
16.15	-54.6875	-54.0466	-55.3589	-55.6641	-54.2908	-54.5044	-53.8025									16.15	-89.5476
16.2	-54.6265	-54.0771	-55.3284	-55.481	-54.1687	-54.4434	-53.8635									16.2	-93.5981
16.25	-54.718	-54.0466	-55.1453	-55.2673	-54.1077	-54.2602	-53.9856									16.25	-95.8731
16.3	-54.5959	-54.0466	-55.3589	-55.5725	-53.894	-54.3823	-53.9856									16.3	-97.2047
16.35	-54.6265	-53.894	-55.2368	-55.481	-54.1687	-54.1687	-53.7415									16.35	-98.6474
16.4	-54.718	-54.1382	-55.1453	-55.2978	-54.2602	-54.3823	-53.9246									16.4	-100.811
16.45	-54.4128	-54.0466	-55.3894	-55.3284	-54.1992	-54.3823	-53.9551									16.45	-104.584
16.5	-54.8401	-54.1077	-55.1758	-55.542	-54.1382	-54.1382	-53.9551									16.5	-112.741
16.55	-54.6875	-53.894	-55.1453	-55.4199	-54.1077	-54.5654	-53.8025									16.55	-125.225
16.6	-54.3518	-53.9856	-55.2978	-55.2673	-53.833	-54.3213	-53.8635									16.6	-142.593
16.65	-54.8706	-54.1382	-55.1147	-55.4199	-54.2297	-54.4128	-54.0161									16.65	-165.62
16.7	-54.6875	-54.1077	-55.1147	-55.5115	-54.2602	-54.3823	-53.9246									16.7	-194.473
16.75	-54.4128	-54.0771	-55.2673	-55.3894	-54.1382	-54.2297	-53.8635									16.75	-228.597
16.8	-54.779	-53.833	-55.1758	-55.2063	-54.1382	-54.5349	-53.8635									16.8	-266.161
16.85	-54.779	-54.0161	-55.1453	-55.481	-53.9246	-54.4128	-54.0771									16.85	-307.388
16.9	-54.5349	-54.1382	-55.2978	-55.481	-54.0161	-54.1687	-54.0161									16.9	-350.834
16.95	-54.779	-54.0771	-55.1758	-55.3589	-54.2602	-54.3823	-53.9551									16.95	-394.668
17	-54.6875	-54.0466	-55.0842	-55.2368	-54.3213	-54.3213	-53.8635									17	-437.947
17.05	-54.5349	-53.833	-55.4504	-55.542	-54.2297	-54.2908	-53.9856									17.05	-479.174
17.1	-54.9011	-54.1077	-55.2368	-55.4199	-54.0161	-54.3518	-53.9856									17.1	-517.016
17.15	-54.718	-54.0466	-55.1147	-55.3589	-54.2297	-54.1992	-54.0161									17.15	-551.306
17.2	-54.5044	-53.9856	-55.3284	-55.2368	-54.3518	-54.2908	-53.7415									17.2	-580.104
17.25	-54.779	-53.8635	-55.2978	-55.542	-54.2908	-54.3823	-53.9246									17.25	-603.686
17.3	-54.718	-54.0771	-55.1147	-55.481	-54.0466	-54.1687	-53.9551									17.3	-621.275
17.35	-54.5044	-54.0466	-55.3284	-55.3894	-54.3823	-54.4434	-54.0466									17.35	-631.651
17.4	-54.8096	-53.9246	-55.2978	-55.2368	-54.2908	-54.5654	-53.9246									17.4	-636.256
17.45	-54.7485	-54.0771	-54.9927	-55.481	-54.1382	-54.1992	-53.772									17.45	-635.812
17.5	-54.5044	-53.894	-55.3589	-55.5115	-54.3213	-54.4739	-54.0161									17.5	-630.596
17.55	-54.8096	-54.1687	-55.3284	-55.3894	-54.0771	-54.3823	-53.9551									17.55	-622.329
17.6	-54.718	-54.1077	-55.0842	-55.2063	-54.3213	-54.2602	-53.9246									17.6	-613.451
17.65	-54.4739	-53.9246	-55.1453	-55.4199	-54.2602	-54.5654	-53.7109									17.65	-606.238
17.7	-54.8401	-54.0466	-55.3284	-55.5115	-53.894	-54.4434	-53.833									17.7	-601.633
17.75	-54.718	-53.8635	-55.2063	-55.4504	-54.1992	-54.1382	-54.0466									17.75	-600.856
17.8	-54.3823	-54.1992	-54.9927	-55.1147	-53.9551	-54.5654	-54.0771									17.8	-605.128
17.85	-54.8706	-53.772	-55.2368	-55.4199	-54.2908	-54.4739	-53.9551									17.85	-612.952
17.9	-54.8096	-54.1382	-55.2673	-55.603	-54.1077	-54.1382	-53.7109									17.9	-624.548
17.95	-54.5654	-53.8635	-54.9622	-55.5115	-54.1992	-54.4739	-53.9246									17.95	-638.032
18	-54.7485	-54.1382	-55.2978	-55.3894	-54.2297	-54.5044	-54.1382									18	-651.016
18.05	-54.779	-54.0161	-55.2673	-55.2978	-54.1992	-54.1382	-54.0161									18.05	-663.722
18.1	-54.657	-53.9246	-55.1758	-55.6335	-54.2297	-54.5349	-53.772									18.1	-673.71
18.15	-54.657	-54.0161	-55.1453	-55.5115	-53.9246	-54.3823	-53.9246									18.15	-680.312
18.2	-54.718	-53.9246	-55.2978	-55.542	-54.2602	-54.0161	-54.0771									18.2	-682.532
18.25	-54.7485	-54.0466	-55.3284	-55.3284	-54.1077	-54.5044	-53.9856									18.25	-680.867
18.3	-54.4739	-53.833	-55.0842	-55.4504	-54.3518	-54.4739	-53.7109									18.3	-674.209
18.35	-54.779	-53.9856	-55.3589	-55.6641	-54.1992	-54.1992	-53.9856									18.35	-662.668
18.4	-54.718	-53.772	-55.2063	-55.481	-54.1077	-54.4128	-53.8025									18.4	-647.742
18.45	-54.4739	-54.1382	-55.1453	-55.4199	-54.2602	-54.5349	-53.8635									18.45	-629.542
18.5	-54.657	-53.9246	-55.2063	-55.2063	-53.9856	-54.2297	-53.9551									18.5	-610.954
18.55	-54.7485	-54.1687	-55.3284	-55.481	-54.3213	-54.4128	-53.6499									18.55	-593.143
18.6	-54.657	-54.1382	-55.3284	-55.6335	-54.1077	-54.4739	-53.894									18.6	-578.495
18.65	-54.5044	-53.9856	-54.9316	-55.4504	-54.1992	-54.4128	-53.8025									18.65	-569.062
18.7	-54.779	-54.1077	-55.2673	-55.4199	-54.2297	-54.4128	-53.9246									18.7	-565.622
18.75	-54.7485	-53.7415	-55.2673	-55.2673	-53.9551	-54.4434	-53.8635									18.75	-570.005
18.8	-54.4739	-54.2297	-55.1453	-55.481	-54.2908	-54.3823	-53.8025									18.8	-581.546
18.85	-54.718	-53.9856	-54.9316	-55.542	-54.1077	-54.2602	-53.894									18.85	-600.079
18.9	-54.7485	-54.0161	-55.2673	-55.5725	-53.9856	-54.4739	-53.7109									18.9	-622.995
18.95	-54.718	-54.0466	-55.2673	-55.4504	-54.2297	-54.4434	-53.833									18.95	-649.24
19	-54.5349	-53.8025	-55.0842	-55.3284	-54.1382	-54.1687	-53.6804									19	-677.094
19.05	-54.8096	-54.1687	-55.1147	-55.5725	-54.1382	-54.4434	-53.894									19.05	-704.172
19.1	-54.718	-54.0771	-55.3284	-55.542	-54.1992	-54.3823	-53.7109									19.1	-729.085
19.15	-54.6875	-53.9246	-55.2978	-55.481	-54.0161	-54.2602	-53.894									19.15	-750.558
19.2	-54.779	-54.1077	-55.0537	-55.3589	-54.1992	-54.2908	-53.5583									19.2	-766.15
19.25	-54.8096	-53.9551	-55.1147	-55.5725	-54.2297	-54.3823	-53.9856									19.25	-775.805
19.3	-54.7485	-54.1077	-55.3589	-55.5725	-53.9856	-54.4128	-53.7415									19.3	-779.855
19.35	-54.4739	-54.1687	-55.2673	-55.3589	-54.2908	-54.1992	-53.9856									19.35	-778.635
19.4	-54.8096	-53.8635	-55.1453	-55.5725	-54.1382	-54.5044	-53.7109									19.4	-772.032
19.45	-54.8401	-54.2602	-55.0842	-55.3894	-53.833	-54.3823	-53.833									19.45	-762.155
19.5	-54.6875	-54.1382	-55.2673	-55.5725	-54.2297	-54.2908	-53.8635									19.5	-750.725
19.55	-54.5044	-54.1077	-55.2063	-55.542	-54.2297	-54.2908	-53.7415									19.55	-738.906
19.6	-54.8401	-54.1382	-55.1147	-55.3894	-53.833	-54.4128	-53.8635									19.6	-728.586
19.65	-54.8401	-53.9856	-55.0842	-55.542	-54.1687	-54.4434	-53.5583									19.65	-721.15
19.7	-54.6875	-54.1687	-55.2368	-55.2063	-54.0771	-54.1992	-54.0161									19.7	-716.046
19.75	-54.5654	-54.1077	-55.1758	-55.6335	-53.894	-54.5959	-53.8025									19.75	-714.88
19.8	-54.9316	-53.8025	-55.1147	-55.4504	-54.1992	-54.4434	-53.894									19.8	-716.268
19.85	-54.9011	-54.2908	-54.9927	-55.6335	-54.1077	-54.3518	-53.833									19.85	-718.82
19.9	-54.7485	-54.1687	-55.2368	-55.5115	-53.8635	-54.3518	-53.6804									19.9	-723.425
19.95	-54.718	-53.8635	-55.2368	-55.5725	-54.2297	-54.5959	-53.9551									19.95	-727.531
20	-55.0232	-54.1687	-55.2063	-55.5725	-54.1687	-54.5044	-53.772									20	-731.859
20.05	-54.9316	-54.1077	-54.8706	-55.5115	-53.8635	-54.2602	-53.9551									20.05	-734.523
20.1	-54.779	-53.9856	-55.2063	-55.6335	-54.1382	-54.4434	-53.9856									20.1	-735.632
20.15	-54.6265	-54.1992	-55.2063	-55.5115	-54.2297	-54.4434	-53.6804									20.15	-734.19
20.2	-54.9927	-54.1077	-55.2368	-55.7556	-53.772	-54.4128	-53.9246									20.2	-730.028
20.25	-54.9316	-53.9856	-55.0232	-55.2368	-54.1992	-54.1992	-53.7415									20.25	-722.482
20.3	-54.779	-54.2297	-55.0842	-55.6641	-54.1687	-54.4434	-53.8635									20.3	-711.329
20.35	-54.6265	-54.0466	-55.1758	-55.3589	-53.9246	-54.5044	-53.9856									20.35	-697.68
20.4	-54.9011	-54.0771	-55.2063	-55.6946	-54.1992	-54.3823	-53.6194									20.4	-681.089
20.45	-54.9316	-54.1992	-55.1453	-55.481	-54.1077	-54.1992	-53.894									20.45	-662.501
20.5	-54.9316	-54.1687	-54.9316	-55.6335	-53.9551	-54.5349	-53.8635									20.5	-643.414
20.55	-54.6265	-54.1992	-55.1453	-55.542	-54.1077	-54.5959	-53.6804									20.55	-625.325
20.6	-54.779	-54.2297	-55.1453	-55.4504	-54.1382	-54.4128	-53.9551									20.6	-609.789
20.65	-54.9316	-54.1077	-55.1147	-55.6335	-53.9551	-54.2297	-53.772									20.65	-598.969
20.7	-54.8706	-54.2297	-54.9927	-55.3589	-53.9246	-54.5044	-53.8025									20.7	-593.698
20.75	-54.6875	-54.2908	-54.9622	-55.5725	-54.1382	-54.5349	-53.9246									20.75	-594.364
20.8	-54.657	-54.1382	-55.1147	-55.5725	-54.0161	-54.5349	-53.6194									20.8	-601.91
20.85	-55.0537	-54.1382	-55.0842	-55.6641	-53.8635	-54.1687	-53.9551									20.85	-614.561
20.9	-54.9011	-54.2602	-55.0537	-55.6335	-54.1077	-54.4739	-53.8635									20.9	-632.594
20.95	-54.8096	-54.1077	-54.9927	-55.3284	-54.0466	-54.4739	-53.7109									20.95	-653.845
21	-54.5959	-54.1077	-54.9927	-55.7251	-53.894	-54.4739	-54.0466									21	-676.04
21.05	-54.8096	-54.1992	-55.1758	-55.5115	-54.0771	-54.2602	-53.833									21.05	-698.456
21.1	-55.0537	-54.0771	-55.0842	-55.5725	-54.0771	-54.3823	-53.7109									21.1	-718.987
21.15	-54.9011	-53.9856	-55.1147	-55.6335	-54.0161	-54.4739	-53.9551									21.15	-736.853
21.2	-54.718	-54.2908	-54.8096	-55.3589	-54.0161	-54.4739	-53.894									21.2	-749.948
21.25	-54.6265	-54.1382	-54.9927	-55.7251	-54.1992	-54.2297	-53.7415									21.25	-758.659
21.3	-54.9316	-53.9246	-55.2673	-55.5115	-54.1077	-54.3213	-53.894									21.3	-761.711
21.35	-54.8706	-54.2602	-55.1453	-55.4199	-53.8635	-54.4739	-53.8025									21.35	-760.324
21.4	-54.8401	-54.2297	-55.1453	-55.5725	-54.1687	-54.5044	-53.894									21.4	-754.054
21.45	-54.7485	-53.9246	-54.9927	-55.4199	-54.1382	-54.3518	-53.894									21.45	-744.566
21.5	-54.6265	-54.1992	-54.9927	-55.6335	-53.9856	-54.2297	-53.6499									21.5	-732.914
21.55	-54.9316	-54.2908	-55.1453	-55.603	-53.9246	-54.4739	-53.8635									21.55	-720.929
21.6	-54.9011	-53.9246	-55.0842	-55.2063	-54.1687	-54.5349	-53.833									21.6	-708.333
21.65	-54.8401	-54.1687	-54.9927	-55.603	-54.1382	-54.4739	-53.6499									21.65	-697.68
21.7	-54.7485	-54.1687	-54.9011	-55.481	-53.9551	-54.1687	-53.8635									21.7	-689.079
21.75	-54.6265	-54.1382	-55.2063	-55.3894	-54.0771	-54.3213	-53.833									21.75	-681.034
21.8	-54.9011	-54.1382	-55.0232	-55.542	-54.1077	-54.5044	-53.5889									21.8	-674.93
21.85	-55.0232	-54.2297	-54.8401	-55.5115	-54.0771	-54.4739	-53.8635									21.85	-669.881
21.9	-54.9622	-54.1382	-55.2063	-55.481	-53.833	-54.3823	-53.894									21.9	-663.999
21.95	-54.8401	-53.9856	-55.1147	-55.542	-54.1077	-54.2297	-53.5889									21.95	-659.172
22	-54.657	-54.2297	-54.8096	-55.3284	-54.0466	-54.4739	-53.9856									22	-653.29
22.05	-54.8706	-54.2297	-55.1147	-55.8166	-54.0466	-54.5654	-53.894									22.05	-646.188
22.1	-55.0232	-53.9856	-55.1147	-55.7251	-53.894	-54.4434	-53.5889									22.1	-638.143
22.15	-54.9927	-54.1382	-55.1147	-55.2978	-54.1992	-54.2602	-53.894									22.15	-629.154
22.2	-54.8706	-54.1992	-55.0842	-55.7251	-54.1992	-54.2908	-53.9551									22.2	-617.89
22.25	-54.6875	-54.0771	-54.9011	-55.6335	-54.1077	-54.4128	-53.7415									22.25	-607.403
22.3	-54.9316	-53.9246	-55.2368	-55.3894	-54.1077	-54.4739	-53.9246									22.3	-595.973
22.35	-54.9927	-54.1382	-54.9011	-55.6946	-54.1687	-54.4128	-53.894									22.35	-585.597
22.4	-54.8706	-54.1077	-55.1453	-55.5725	-54.2602	-54.3518	-53.7415									22.4	-576.053
22.45	-54.657	-53.9551	-55.1147	-55.2978	-54.1382	-54.1687	-53.833									22.45	-570.005
22.5	-54.8706	-54.0771	-55.1758	-55.5725	-54.1382	-54.4128	-53.8635									22.5	-567.064
22.55	-54.9927	-54.1687	-55.1758	-55.5725	-54.3213	-54.4434	-53.7415									22.55	-568.618
22.6	-54.8401	-54.1687	-55.0537	-55.2978	-54.2297	-54.4128	-53.6804									22.6	-576.386
22.65	-54.718	-53.9551	-55.2063	-55.542	-54.1687	-54.4434	-53.894									22.65	-588.371
22.7	-54.779	-54.1382	-54.9622	-55.542	-54.0771	-54.2297	-53.833									22.7	-606.071
22.75	-54.779	-54.2297	-55.1453	-55.3284	-54.3213	-54.3823	-53.5889									22.75	-629.043
22.8	-54.8706	-54.0771	-54.8706	-55.6335	-54.1992	-54.4739	-53.894									22.8	-654.511
22.85	-54.9622	-54.0771	-55.2063	-55.481	-54.1077	-54.5044	-53.9246									22.85	-683.42
22.9	-54.718	-54.1992	-54.9927	-55.3894	-54.0771	-54.3823	-53.5583									22.9	-712.495
22.95	-55.0232	-54.1077	-55.2368	-55.603	-54.2602	-54.1382	-53.894									22.95	-742.124
23	-54.718	-53.9246	-55.2063	-55.4504	-54.2297	-54.4434	-53.8635									23	-769.757
23.05	-54.9927	-54.0771	-55.0842	-55.3589	-54.1687	-54.4739	-53.7109									23.05	-794.948
23.1	-54.9011	-54.2297	-55.1453	-55.603	-54.0771	-54.2602	-53.833									23.1	-816.532
23.15	-54.9316	-54.1382	-54.9011	-55.5115	-54.2908	-54.3213	-53.833									23.15	-831.846
23.2	-55.0537	-53.9856	-55.2978	-55.3284	-54.2602	-54.4128	-53.772									23.2	-842.943
23.25	-54.7485	-54.1077	-55.0537	-55.6335	-54.2297	-54.3213	-53.6499									23.25	-847.993
23.3	-54.9316	-54.1687	-55.2063	-55.603	-54.0466	-54.2908	-53.894									23.3	-846.883
23.35	-54.6875	-54.0771	-55.2978	-55.2673	-54.2602	-54.4128	-53.772									23.35	-840.28
23.4	-54.9622	-53.8025	-54.9316	-55.542	-54.3213	-54.1077	-53.5278									23.4	-829.072
23.45	-54.718	-54.1992	-55.2673	-55.5115	-54.2602	-54.4739	-53.8635									23.45	-813.314
23.5	-54.9927	-54.1382	-55.1453	-55.2368	-54.1687	-54.4128	-53.833									23.5	-794.282
23.55	-54.8706	-54.1077	-55.1147	-55.542	-54.0771	-54.3518	-53.7415									23.55	-774.085
23.6	-54.8706	-53.9551	-55.2368	-55.5115	-54.2602	-54.4434	-53.5889									23.6	-752.889
23.65	-54.9622	-54.1382	-54.9622	-55.3284	-54.1992	-54.1382	-53.772									23.65	-733.08
23.7	-54.6265	-54.2602	-55.2063	-55.3589	-54.2297	-54.4434	-53.833									23.7	-714.159
23.75	-54.8706	-54.0466	-55.1758	-55.5115	-53.9856	-54.1687	-53.5278									23.75	-697.846
23.8	-54.657	-53.9856	-54.8706	-55.3589	-54.1077	-54.4128	-53.833									23.8	-683.364
23.85	-54.9011	-54.0771	-55.2368	-55.3589	-54.2602	-54.2602	-53.8025									23.85	-670.769
23.9	-54.9011	-54.2602	-55.1758	-55.5115	-54.0771	-54.5044	-53.833									23.9	-659.949
23.95	-54.779	-54.1077	-54.9927	-55.5725	-54.1687	-54.4128	-53.5583									23.95	-649.739
24	-54.9927	-53.9551	-55.2063	-55.3284	-53.9246	-54.4434	-53.8635									24	-639.585
24.05	-54.718	-53.9246	-55.0537	-55.542	-54.1382	-54.4434	-53.6804									24.05	-629.82
24.1	-54.9927	-54.1992	-55.1453	-55.542	-54.2602	-54.2297	-53.6804									24.1	-619.555
24.15	-54.9622	-54.1382	-55.1758	-55.4199	-54.1992	-54.3518	-53.8025									24.15	-609.29
24.2	-54.7485	-54.0161	-54.9927	-55.542	-54.1382	-54.1687	-53.8635									24.2	-599.358
24.25	-55.0537	-53.8025	-55.2673	-55.5115	-53.9856	-54.4739	-53.772									24.25	-589.98
24.3	-54.8401	-54.1992	-55.2368	-55.5115	-54.1382	-54.2602	-53.5889									24.3	-582.046
24.35	-54.9011	-54.1687	-54.9316	-55.2368	-54.2908	-54.4434	-53.7109									24.35	-575.609
24.4	-54.9622	-54.1382	-55.2063	-55.6335	-54.2297	-54.4128	-53.894									24.4	-572.003
24.45	-54.718	-53.9246	-55.2673	-55.481	-54.1992	-54.2602	-53.7415									24.45	-572.169
24.5	-54.9927	-54.0771	-54.8096	-55.2368	-53.9551	-54.4739	-53.4668									24.5	-575.609
24.55	-54.8401	-54.1992	-55.1453	-55.481	-54.1382	-54.1992	-53.6499									24.55	-583.932
24.6	-54.718	-54.1382	-55.1758	-55.542	-54.2297	-54.5044	-53.833									24.6	-596.694
24.65	-54.9927	-54.0771	-54.8706	-55.542	-54.1992	-54.4128	-53.8025									24.65	-613.895
24.7	-54.9622	-53.894	-55.1453	-55.2368	-54.1687	-54.2602	-53.4668									24.7	-634.703
24.75	-54.779	-54.1687	-55.0537	-55.481	-54.0161	-54.5044	-53.772									24.75	-658.229
24.8	-54.9927	-54.2297	-54.779	-55.6335	-53.894	-54.4434	-53.8025									24.8	-682.865
24.85	-54.8706	-54.1382	-55.1453	-55.3894	-54.1992	-54.4128	-53.8025									24.85	-708.333
24.9	-54.8096	-54.1077	-55.1453	-55.4199	-54.1382	-54.5044	-53.5583									24.9	-733.025
24.95	-55.0232	-53.894	-54.8706	-55.603	-54.1077	-54.1992	-53.8025									24.95	-755.83
25	-54.8706	-54.1077	-55.1147	-55.6641	-54.0771	-54.5959	-53.9551									25	-776.249
25.05	-54.779	-54.2908	-55.2063	-55.4199	-53.9551	-54.5044	-53.8025									25.05	-791.896
25.1	-55.1147	-54.1382	-54.779	-55.542	-54.0161	-54.1687	-53.6194									25.1	-804.325
25.15	-54.8096	-54.0466	-55.1453	-55.603	-54.1687	-54.5349	-53.7109									25.15	-811.815
25.2	-54.9011	-53.9246	-55.1453	-55.6641	-54.2602	-54.3518	-53.9856									25.2	-813.979
25.25	-55.0842	-54.0771	-54.8401	-55.3589	-54.2297	-54.4128	-53.7415									25.25	-811.76
25.3	-54.9622	-54.1382	-55.1758	-55.5115	-54.0161	-54.4434	-53.7109									25.3	-804.214
25.35	-54.9011	-54.1382	-55.0842	-55.6335	-53.9246	-54.2908	-53.5889									25.35	-792.229
25.4	-55.0232	-53.8635	-54.9622	-55.6335	-54.2908	-54.5044	-53.8635									25.4	-776.803
25.45	-54.8706	-54.0466	-55.1453	-55.3284	-54.2297	-54.4434	-53.772									25.45	-758.16
25.5	-54.8401	-54.1077	-55.2063	-55.542	-54.1382	-54.2908	-53.7415									25.5	-737.63
25.55	-55.0232	-54.1382	-54.9622	-55.542	-53.9551	-54.4434	-53.5278									25.55	-716.157
25.6	-54.8706	-53.8025	-54.9622	-55.481	-54.2602	-54.5044	-53.7415									25.6	-694.85
25.65	-54.779	-54.1687	-55.0842	-55.2368	-54.1992	-54.1687	-53.833									25.65	-674.542
25.7	-55.0842	-54.1382	-54.9927	-55.542	-53.8635	-54.5654	-53.8635									25.7	-657.618
25.75	-54.9927	-53.9246	-54.9316	-55.542	-54.1992	-54.5349	-53.6804									25.75	-641.805
25.8	-54.718	-54.2908	-55.1147	-55.5115	-54.1687	-54.2602	-53.6499									25.8	-630.319
25.85	-55.0232	-54.0161	-55.0842	-55.3589	-53.8635	-54.5959	-53.8635									25.85	-619.721
25.9	-54.9927	-54.1382	-54.8096	-55.5115	-54.1382	-54.5349	-53.8635									25.9	-611.343
25.95	-54.657	-54.2602	-55.1758	-55.542	-53.9856	-54.1992	-53.8635									25.95	-604.185
26	-55.0537	-53.894	-55.0842	-55.542	-54.0771	-54.5959	-53.8025									26	-597.416
26.05	-54.9927	-54.1687	-54.8401	-55.3894	-54.1382	-54.6265	-53.7415									26.05	-590.924
26.1	-54.7485	-53.9246	-55.0842	-55.481	-53.9246	-54.1687	-53.894									26.1	-584.876
26.15	-55.1453	-54.2297	-55.0842	-55.603	-54.1992	-54.5349	-53.894									26.15	-576.997
26.2	-55.0232	-54.0161	-54.9927	-55.603	-53.894	-54.5959	-53.833									26.2	-568.507
26.25	-54.9316	-54.2297	-54.8706	-55.481	-54.3213	-54.1992	-53.6804									26.25	-560.462
26.3	-54.9927	-54.1077	-55.2368	-55.4199	-54.1687	-54.5654	-53.7415									26.3	-551.362
26.35	-55.1147	-54.0161	-55.1758	-55.6335	-54.1687	-54.4434	-53.894									26.35	-542.428
26.4	-54.8706	-54.1992	-54.8096	-55.5115	-54.2297	-54.1992	-53.9246									26.4	-534.272
26.45	-54.8401	-54.0466	-55.1453	-55.5115	-54.0466	-54.5349	-53.6804									26.45	-526.282
26.5	-55.0842	-54.1687	-55.1453	-55.2368	-54.1687	-54.5349	-53.9246									26.5	-520.067
26.55	-54.9927	-53.9551	-55.1147	-55.481	-53.833	-54.2908	-53.894									26.55	-514.907
26.6	-54.6875	-54.2908	-54.9011	-55.5725	-54.1992	-54.4128	-53.7415									26.6	-511.8
26.65	-54.9316	-53.8635	-55.1147	-55.5115	-54.0161	-54.5349	-53.7109									26.65	-510.468
26.7	-54.9316	-54.2602	-55.1147	-55.3894	-54.1992	-54.3518	-53.8635									26.7	-510.857
26.75	-54.8401	-54.0771	-54.9011	-55.3284	-54.1687	-54.4434	-53.7109									26.75	-513.631
26.8	-54.8401	-54.3213	-55.1453	-55.5115	-54.1077	-54.6875	-53.8635									26.8	-516.905
26.85	-54.9927	-54.2908	-55.1758	-55.5115	-54.1077	-54.5654	-53.9551									26.85	-521.843
26.9	-54.8706	-54.1077	-55.0232	-55.542	-53.8635	-54.4434	-53.6194									26.9	-527.336
26.95	-54.8401	-54.1992	-54.9316	-55.3589	-54.1992	-54.6265	-53.9551									26.95	-533.162
27	-54.9622	-53.894	-55.1453	-55.2978	-54.1382	-54.5959	-53.5889									27	-538.322
27.05	-54.9011	-54.3518	-55.0232	-55.5725	-53.9856	-54.2602	-54.0161									27.05	-542.817
27.1	-54.779	-54.1382	-55.0842	-55.5725	-54.1687	-54.718	-53.8025									27.1	-545.369
27.15	-54.8096	-54.1687	-55.0232	-55.481	-53.9551	-54.5349	-53.894									27.15	-546.701
27.2	-55.0537	-54.1687	-55.2673	-55.2673	-54.1687	-54.3213	-53.9246									27.2	-545.702
27.25	-54.9316	-53.8635	-55.1147	-55.3894	-54.2602	-54.4739	-53.9246									27.25	-543.094
27.3	-54.5654	-54.2908	-55.0537	-55.6335	-53.9856	-54.5349	-54.0161									27.3	-538.711
27.35	-54.9622	-54.0771	-55.1147	-55.542	-54.2908	-54.5044	-53.7109									27.35	-532.552
27.4	-54.9927	-54.1382	-55.2978	-55.3284	-54.1687	-54.3213	-53.894									27.4	-525.172
27.45	-54.779	-54.1992	-55.1758	-55.3894	-54.0771	-54.4434	-53.772									27.45	-516.516
27.5	-54.5959	-53.9246	-54.9927	-55.603	-54.2602	-54.4434	-53.9551									27.5	-508.36
27.55	-54.8706	-54.2602	-55.1453	-55.4504	-54.1077	-54.1687	-53.7109									27.55	-499.926
27.6	-54.8401	-54.0771	-55.2368	-55.2673	-54.1687	-54.4739	-53.9246									27.6	-492.657
27.65	-54.718	-54.0771	-55.2063	-55.5115	-54.1992	-54.5044	-53.5278									27.65	-485.666
27.7	-54.5959	-54.2908	-54.9927	-55.3894	-53.9551	-54.5044	-53.9551									27.7	-479.84
27.75	-54.9011	-54.1077	-55.0842	-55.3589	-54.1992	-54.3518	-53.772									27.75	-474.846
27.8	-54.8401	-54.1687	-55.2978	-55.481	-54.1382	-54.6265	-53.894									27.8	-471.517
27.85	-54.718	-54.2297	-55.2368	-55.2673	-54.0161	-54.5349	-53.8635									27.85	-468.465
27.9	-54.7485	-54.0161	-55.0232	-55.3894	-54.2297	-54.4128	-53.8635									27.9	-466.689
27.95	-54.9316	-54.2297	-54.9316	-55.481	-54.1687	-54.5654	-53.9246									27.95	-464.082
28	-54.9316	-54.1992	-55.2673	-55.2978	-53.9856	-54.5959	-53.5889									28	-462.029
28.05	-54.6875	-53.9246	-55.1758	-55.542	-54.1992	-54.4739	-53.9551									28.05	-459.365
28.1	-54.6875	-54.2297	-55.0537	-55.2673	-54.1992	-54.2908	-53.894									28.1	-456.202
28.15	-54.9316	-54.2297	-54.9011	-55.542	-53.9856	-54.5654	-53.9246									28.15	-452.984
28.2	-54.9011	-53.9856	-55.2978	-55.2673	-54.2602	-54.5349	-53.833									28.2	-448.601
28.25	-54.8401	-54.2297	-55.2673	-55.5115	-54.2297	-54.3213	-53.6804									28.25	-443.884
28.3	-54.6875	-54.1077	-55.1758	-55.3284	-53.894	-54.3213	-53.9551									28.3	-438.78
28.35	-54.8096	-54.0161	-54.9622	-55.603	-54.2297	-54.5349	-53.7415									28.35	-433.176
28.4	-54.8706	-54.1992	-55.2063	-55.4504	-54.2297	-54.4739	-53.894									28.4	-427.849
28.45	-54.6875	-54.1077	-55.2978	-55.5725	-53.833	-54.2908	-53.8635									28.45	-422.633
28.5	-54.5654	-54.1077	-55.2673	-55.3589	-54.1992	-54.2908	-53.6499									28.5	-417.972
28.55	-54.8706	-54.1687	-55.0842	-55.4504	-54.2297	-54.5044	-53.8635									28.55	-412.867
28.6	-54.8401	-54.0466	-55.0842	-55.5115	-54.0466	-54.4739	-53.8025									28.6	-408.872
28.65	-54.8096	-54.1687	-55.2978	-55.3894	-54.0466	-54.3823	-53.833									28.65	-405.21
28.7	-54.5654	-54.2297	-55.2673	-55.481	-54.1382	-54.3518	-53.8635									28.7	-403.102
28.75	-54.779	-54.1077	-55.2063	-55.1758	-54.0466	-54.5654	-53.6804									28.75	-401.16
28.8	-54.8401	-54.2297	-54.9011	-55.5115	-54.0466	-54.5654	-53.9856									28.8	-400.161
28.85	-54.779	-54.1992	-55.1147	-55.1453	-54.1992	-54.2602	-53.894									28.85	-399.273
28.9	-54.5959	-54.0161	-55.2978	-55.542	-54.0466	-54.3823	-53.7415									28.9	-398.718
28.95	-54.6875	-54.1687	-55.1147	-55.3894	-53.8635	-54.6265	-53.9856									28.95	-398.164
29	-54.8706	-54.2297	-55.0842	-55.5725	-54.1992	-54.6265	-53.833									29	-398.164
29.05	-54.8706	-53.9551	-54.9316	-55.542	-54.1992	-54.3213	-53.894									29.05	-397.664
29.1	-54.718	-54.1382	-55.1147	-55.2368	-53.8635	-54.2908	-54.0161									29.1	-396.277
29.15	-54.5349	-54.1382	-55.2673	-55.542	-54.1992	-54.6265	-53.7415									29.15	-395.167
29.2	-54.8096	-54.0161	-55.1758	-55.3284	-54.2297	-54.5654	-54.0466									29.2	-393.392
29.25	-54.9011	-54.0771	-55.1758	-55.6335	-53.894	-54.4434	-53.894									29.25	-391.006
29.3	-54.8401	-54.1382	-54.9011	-55.4504	-54.0771	-54.1992	-53.5889									29.3	-388.731
29.35	-54.5349	-54.0771	-55.2368	-55.2978	-54.1687	-54.5959	-54.0161									29.35	-385.679
29.4	-54.657	-54.0161	-55.2368	-55.542	-54.1687	-54.4739	-53.9246									29.4	-382.627
29.45	-54.8401	-54.1687	-55.2063	-55.3284	-54.0466	-54.4739	-53.7109									29.45	-379.076
29.5	-54.8706	-54.0466	-55.1758	-55.5725	-54.1992	-54.1992	-53.8635									29.5	-375.969
29.55	-54.8096	-54.0466	-54.8706	-55.542	-54.1382	-54.5349	-53.772									29.55	-373.25
29.6	-54.4739	-54.2297	-55.1758	-55.2368	-53.8635	-54.5959	-53.7415									29.6	-370.309
29.65	-54.657	-54.1382	-55.3284	-55.603	-54.1992	-54.5654	-53.894									29.65	-367.424
29.7	-54.9011	-53.9246	-55.1758	-55.4504	-54.1077	-54.3518	-53.772									29.7	-365.149
29.75	-54.9011	-54.2602	-55.1147	-55.4199	-54.0161	-54.2908	-53.7415									29.75	-362.153
29.8	-54.8096	-54.2908	-54.8706	-55.542	-53.9246	-54.657	-53.894									29.8	-360.211
29.85	-54.5959	-53.833	-54.9927	-55.2978	-54.1687	-54.5349	-53.7109									29.85	-357.88
29.9	-54.6875	-54.2908	-55.2063	-55.5725	-54.1382	-54.4128	-53.9246									29.9	-355.383
29.95	-54.8706	-54.1992	-55.1758	-55.5725	-53.833	-54.1992	-53.894									29.95	-353.275
30	-54.8096	-54.1382	-54.9316	-55.2673	-53.9246	-54.4739	-53.6499									30	-351.333
30.05	-54.8401	-54.0466	-54.9927	-55.6946	-54.1077	-54.5654	-53.894									30.05	-349.335
30.1	-54.7485	-54.1687	-55.2063	-55.542	-54.0161	-54.5349	-53.894									30.1	-348.059
30.15	-54.6875	-54.1077	-55.1453	-55.3589	-53.772	-54.4128	-53.6499									30.15	-346.783
30.2	-54.8096	-53.8635	-54.8706	-55.542	-54.0466	-54.2602	-53.9551									30.2	-346.006
30.25	-54.9316	-54.2297	-55.1147	-55.4504	-54.1382	-54.3518	-53.9551									30.25	-345.174
30.3	-54.9011	-54.1992	-55.2063	-55.6641	-53.9246	-54.5959	-53.6194									30.3	-345.84
30.35	-54.8096	-53.833	-54.9316	-55.603	-53.894	-54.4128	-53.894									30.35	-346.617
30.4	-54.657	-54.1687	-55.1758	-55.2368	-54.1077	-54.2908	-53.9551									30.4	-348.226
30.45	-54.7485	-54.1687	-54.9622	-55.603	-54.1382	-54.1992	-53.7415									30.45	-350.778
30.5	-54.9316	-54.0466	-55.1758	-55.5725	-53.9856	-54.4739	-53.894									30.5	-353.941
30.55	-54.8401	-53.9246	-55.1147	-55.2368	-53.9246	-54.5349	-53.8635									30.55	-357.769
30.6	-54.8706	-54.2908	-54.9011	-55.6335	-54.1687	-54.3823	-53.7415									30.6	-361.764
30.65	-54.5654	-54.1687	-55.0537	-55.542	-54.1077	-54.4434	-53.833									30.65	-366.37
30.7	-54.7485	-54.0466	-54.8401	-55.3284	-53.8635	-54.2297	-53.9856									30.7	-370.476
30.75	-54.9011	-54.1687	-55.2063	-55.6335	-54.0466	-54.3823	-53.8635									30.75	-374.249
30.8	-54.8706	-54.3518	-54.8096	-55.5115	-54.1382	-54.5959	-53.6804									30.8	-377.966
30.85	-54.5959	-54.1992	-55.0842	-55.2978	-54.0466	-54.4739	-54.0466									30.85	-380.852
30.9	-54.8401	-53.9246	-54.9622	-55.603	-53.7415	-54.4434	-53.9246									30.9	-383.737
30.95	-54.9011	-54.3213	-55.0842	-55.5115	-54.0466	-54.2297	-53.7109									30.95	-385.846
31	-54.5044	-54.1992	-55.0842	-55.3894	-54.1077	-54.3213	-54.0466									31	-387.843
31.05	-54.9622	-54.1992	-55.0537	-55.603	-53.9856	-54.5959	-54.0466									31.05	-388.675
31.1	-54.779	-54.0466	-55.0537	-55.5725	-53.772	-54.5349	-53.7109									31.1	-388.842
31.15	-54.7485	-54.2908	-54.8401	-55.5115	-54.0161	-54.4434	-54.0161									31.15	-388.287
31.2	-54.9622	-54.3213	-55.0842	-55.6641	-54.0161	-54.2602	-54.0161									31.2	-387.177
31.25	-54.5959	-53.9856	-54.7485	-55.542	-53.9246	-54.2908	-53.8635									31.25	-385.901
31.3	-54.9622	-54.1992	-55.2063	-55.481	-53.8635	-54.5349	-54.0771									31.3	-383.404
31.35	-54.8706	-54.4128	-55.1147	-55.6641	-53.9246	-54.5349	-53.9856									31.35	-381.351
31.4	-54.9011	-54.2908	-55.1453	-55.481	-54.0161	-54.1992	-53.9246									31.4	-378.022
31.45	-54.8401	-54.1382	-55.1453	-55.3894	-54.0466	-54.3518	-53.833									31.45	-374.804
31.5	-54.5959	-54.2602	-54.8706	-55.5725	-53.9246	-54.4434	-54.0771									31.5	-371.364
31.55	-54.8706	-54.3213	-55.2368	-55.5115	-53.8635	-54.3518	-54.0161									31.55	-368.256
31.6	-54.5654	-54.2602	-55.0232	-55.3284	-54.0771	-54.4128	-53.6804									31.6	-365.371
31.65	-54.9316	-54.0466	-55.1147	-55.5725	-54.0161	-54.4434	-53.9856									31.65	-363.041
31.7	-54.5959	-54.2908	-55.0537	-55.5115	-54.0466	-54.2297	-54.0466									31.7	-360.988
31.75	-54.9011	-54.3213	-54.8096	-55.2978	-53.7415	-54.5654	-53.8635									31.75	-359.656
31.8	-54.8096	-54.2602	-55.1758	-55.6335	-54.0161	-54.4739	-53.9246									31.8	-359.046
31.85	-54.9011	-54.0771	-55.0232	-55.5725	-54.1077	-54.4739	-54.0161									31.85	-359.101
31.9	-54.8401	-54.2908	-54.9622	-55.3284	-54.0466	-54.5654	-54.0771									31.9	-360.377
31.95	-54.657	-54.3518	-55.1147	-55.603	-53.833	-54.3213	-53.7109									31.95	-362.597
32	-54.9316	-54.2297	-54.8096	-55.603	-53.8635	-54.5654	-54.0771									32	-365.205
32.05	-54.5959	-54.0161	-55.2063	-55.3284	-54.0466	-54.1992	-54.0466									32.05	-368.867
32.1	-54.9316	-54.1077	-55.1453	-55.5115	-54.0161	-54.5959	-54.0161									32.1	-373.916
32.15	-54.779	-54.3518	-54.8096	-55.603	-53.9551	-54.4128	-53.9246									32.15	-379.132
32.2	-54.9316	-54.2297	-55.2368	-55.5725	-53.772	-54.5654	-54.1077									32.2	-385.235
32.25	-54.9622	-54.1077	-55.0537	-55.3589	-53.9246	-54.4128	-54.1382									32.25	-392.06
32.3	-54.5349	-54.0161	-54.9622	-55.6641	-54.1077	-54.4128	-53.894									32.3	-399.051
32.35	-54.9011	-54.3823	-55.1147	-55.5115	-54.0771	-54.5044	-54.0466									32.35	-405.21
32.4	-54.718	-54.2908	-55.0537	-55.3284	-54.0466	-54.2908	-54.0771									32.4	-412.035
32.45	-54.9622	-54.1687	-55.1758	-55.603	-53.6804	-54.4739	-54.1077									32.45	-417.417
32.5	-54.8401	-53.9856	-55.1453	-55.5115	-53.9551	-54.0771	-53.8635									32.5	-422.578
32.55	-54.4739	-54.2297	-54.9622	-55.2368	-54.1992	-54.5044	-54.1077									32.55	-427.127
32.6	-54.9316	-54.2908	-55.2978	-55.4504	-54.1077	-54.3213	-54.1382									32.6	-430.956
32.65	-54.8096	-54.2908	-55.2063	-55.603	-53.9551	-54.5349	-54.0466									32.65	-433.619
32.7	-54.6265	-54.1687	-54.9011	-55.3589	-53.833	-54.4434	-53.8635									32.7	-435.173
32.75	-54.8401	-54.1687	-55.1758	-55.1758	-54.0771	-54.4128	-54.1992									32.75	-435.506
32.8	-54.6875	-54.3213	-55.2063	-55.5725	-54.1687	-54.5044	-54.1077									32.8	-435.339
32.85	-54.7485	-54.2908	-54.9011	-55.481	-54.0771	-54.2297	-54.0466									32.85	-433.286
32.9	-54.8096	-54.2602	-55.2368	-55.2063	-54.0161	-54.5959	-53.894									32.9	-430.956
32.95	-54.5654	-54.0466	-55.1758	-55.3589	-53.9551	-54.5349	-54.2297									32.95	-427.349
33	-54.8096	-54.1382	-54.8096	-55.542	-53.833	-54.3823	-54.1687									33	-423.854
33.05	-54.8401	-54.2908	-55.2673	-55.481	-54.0771	-54.5349	-54.0161									33.05	-418.638
33.1	-54.4434	-54.2908	-55.2368	-55.1758	-54.1077	-54.2297	-53.9551									33.1	-413.533
33.15	-54.8401	-54.2297	-54.9316	-55.5115	-54.1382	-54.5654	-54.2297									33.15	-407.707
33.2	-54.779	-54.0161	-55.2368	-55.4504	-53.9856	-54.5044	-54.1687									33.2	-401.77
33.25	-54.6265	-54.2297	-55.3284	-55.3589	-53.894	-54.2297	-54.1077									33.25	-395.278
33.3	-54.9011	-54.2908	-54.9011	-55.2368	-53.9856	-54.5654	-53.894									33.3	-388.897
33.35	-54.718	-54.2602	-55.2978	-55.542	-54.1687	-54.3823	-54.1992									33.35	-382.905
33.4	-54.5349	-54.1992	-55.2673	-55.4504	-54.1382	-54.2602	-54.2602									33.4	-376.468
33.45	-54.8706	-54.0161	-54.9622	-55.2063	-54.1077	-54.4434	-54.1077									33.45	-371.086
33.5	-54.8096	-54.1687	-55.3284	-55.3589	-53.9551	-54.2602	-53.894									33.5	-366.481
33.55	-54.5654	-54.3823	-55.2063	-55.542	-53.8025	-54.3823	-54.1992									33.55	-361.764
33.6	-54.7485	-54.2908	-54.9927	-55.3894	-54.0771	-54.5654	-54.1687									33.6	-358.324
33.65	-54.6265	-54.1992	-55.2368	-55.1453	-54.1992	-54.2602	-54.2297									33.65	-355.605
33.7	-54.5349	-54.0161	-55.2673	-55.481	-54.1687	-54.4739	-53.9246									33.7	-353.885
33.75	-54.8401	-54.3518	-55.0232	-55.3894	-53.9551	-54.4434	-53.9856									33.75	-352.942
33.8	-54.657	-54.2908	-55.0842	-55.3589	-53.9856	-54.2908	-54.1992									33.8	-353.386
33.85	-54.4434	-54.1382	-55.1453	-55.2368	-54.2602	-54.5654	-54.1992									33.85	-354.551
33.9	-54.779	-54.1382	-55.0537	-55.4199	-54.1077	-54.4739	-54.0771									33.9	-356.216
33.95	-54.6265	-54.3823	-55.0232	-55.4199	-53.894	-54.1687	-53.9246									33.95	-358.38
34	-54.4434	-54.2297	-55.2368	-55.3589	-54.1382	-54.5044	-54.1992									34	-361.376
34.05	-54.718	-54.1077	-55.1453	-55.2368	-54.0771	-54.4739	-54.1687									34.05	-364.372
34.1	-54.8401	-54.1992	-54.9316	-55.481	-53.8635	-54.1992	-54.1992									34.1	-368.09
34.15	-54.5044	-54.1687	-55.2063	-55.4199	-54.2602	-54.4739	-54.0161									34.15	-372.029
34.2	-54.7485	-54.2908	-55.2063	-55.4199	-54.1077	-54.3213	-54.1077									34.2	-375.414
34.25	-54.8096	-54.3518	-54.8706	-55.2673	-53.9246	-54.2297	-54.3213									34.25	-378.299
34.3	-54.5349	-54.0161	-55.2063	-55.481	-54.1382	-54.4739	-54.2602									34.3	-381.462
34.35	-54.9011	-54.2297	-55.2368	-55.4504	-53.9551	-54.3213	-54.2602									34.35	-383.848
34.4	-54.718	-53.9551	-55.0232	-55.5115	-54.1687	-54.1077	-54.0161									34.4	-385.124
34.45	-54.5349	-54.3518	-54.9927	-55.2978	-54.2297	-54.5044	-54.1077									34.45	-385.79
34.5	-54.7485	-54.1077	-55.2978	-55.4199	-54.1077	-54.2908	-54.2297									34.5	-385.235
34.55	-54.718	-54.2297	-55.2978	-55.481	-54.1992	-54.0771	-54.1382									34.55	-384.014
34.6	-54.5654	-54.2297	-54.8096	-55.4199	-53.9246	-54.4128	-54.1077									34.6	-381.684
34.65	-54.4739	-54.1687	-55.2368	-55.3589	-54.2297	-54.3518	-53.9246									34.65	-378.355
34.7	-54.657	-54.2602	-55.2063	-55.1758	-53.9856	-54.0771	-54.2602									34.7	-375.248
34.75	-54.5654	-54.0771	-55.1147	-55.5725	-54.2297	-54.4128	-54.1077									34.75	-371.364
34.8	-54.3823	-54.3823	-55.0232	-55.4199	-54.0466	-54.3213	-54.1077									34.8	-368.034
34.85	-54.718	-54.0161	-55.2368	-55.3284	-54.1687	-54.1687	-53.9856									34.85	-363.651
34.9	-54.5654	-54.2297	-55.2063	-55.1453	-54.1382	-54.4434	-54.2602									34.9	-359.933
34.95	-54.4128	-53.9246	-54.9316	-55.3894	-54.0466	-54.3823	-54.1687									34.95	-356.216
35	-54.6265	-54.3213	-55.2978	-55.4504	-54.1077	-54.1077	-53.9246									35	-352.831
35.05	-54.6265	-54.1992	-55.1758	-55.481	-53.8025	-54.5044	-54.3213									35.05	-350.112
35.1	-54.5044	-54.1992	-55.0537	-55.3589	-54.1687	-54.3823	-54.0466									35.1	-347.005
35.15	-54.5044	-54.1077	-54.9622	-55.3284	-53.9551	-54.1077	-54.0771									35.15	-344.619
35.2	-54.7485	-54.1077	-55.2978	-55.5115	-54.1382	-54.2602	-54.1687									35.2	-342.566
35.25	-54.6265	-54.2602	-55.1758	-55.481	-54.1687	-54.3823	-53.9856									35.25	-339.459
35.3	-54.3518	-53.9551	-54.9927	-55.4199	-53.9551	-54.2908	-54.3518									35.3	-336.685
35.35	-54.7485	-54.2297	-55.1147	-55.2978	-54.1992	-54.2297	-54.1077									35.35	-334.132
35.4	-54.718	-54.0771	-55.2063	-55.3894	-53.9856	-54.3518	-54.2297									35.4	-331.968
35.45	-54.5349	-54.1382	-55.1453	-55.481	-54.1077	-54.3213	-54.1992									35.45	-328.916
35.5	-54.4739	-54.2908	-55.0232	-55.481	-54.1992	-53.9856	-54.2297									35.5	-325.643
35.55	-54.718	-53.9856	-55.1758	-55.4504	-53.833	-54.4739	-54.1382									35.55	-322.646
35.6	-54.6265	-54.2297	-55.2978	-55.2673	-54.1992	-54.3518	-54.0161									35.6	-319.65
35.65	-54.3823	-54.2602	-55.1147	-55.3894	-54.1992	-54.1077	-54.2602									35.65	-316.598
35.7	-54.5654	-54.0771	-54.8401	-55.542	-54.0466	-54.3518	-53.894									35.7	-314.49
35.75	-54.657	-54.2908	-55.2063	-55.5115	-54.2908	-54.3823	-54.2297									35.75	-312.492
35.8	-54.5959	-54.0161	-55.2063	-55.2673	-54.0771	-54.3518	-53.8025									35.8	-311.05
35.85	-54.3213	-54.3213	-55.1758	-55.4504	-54.1077	-54.1992	-54.2297									35.85	-309.829
35.9	-54.657	-54.3823	-54.779	-55.3589	-54.1382	-54.5044	-54.0161									35.9	-309.219
35.95	-54.6265	-53.9856	-55.0842	-55.3284	-53.9551	-54.5044	-54.2602									35.95	-308.941
36	-54.5654	-54.3518	-55.1758	-55.4504	-54.1992	-54.1992	-54.0771									36	-309.163
36.05	-54.4128	-54.3518	-55.1453	-55.481	-54.1992	-54.3823	-54.1687									36.05	-309.552
36.1	-54.7485	-54.1687	-54.8706	-55.2978	-53.894	-54.4434	-54.2602									36.1	-309.829
36.15	-54.6265	-54.3213	-55.1453	-55.603	-54.1992	-54.3823	-54.1077									36.15	-310.606
36.2	-54.6265	-54.2297	-55.1147	-55.542	-54.1992	-54.1687	-54.1992									36.2	-311.494
36.25	-54.6265	-54.3213	-55.1147	-55.3894	-53.894	-54.5044	-53.9551									36.25	-311.438
36.3	-54.7485	-54.3518	-54.9622	-55.542	-54.1687	-54.4128	-54.3213									36.3	-311.771
36.35	-54.718	-54.0771	-54.9927	-55.2368	-54.2908	-54.3213	-54.0771									36.35	-311.716
36.4	-54.6265	-54.3213	-55.1758	-55.6946	-53.8635	-54.2908	-54.2602									36.4	-312.048
36.45	-54.5959	-54.2908	-55.1453	-55.3589	-54.1992	-54.5654	-54.2908									36.45	-312.492
36.5	-54.779	-54.0466	-54.9316	-55.5725	-54.2602	-54.3823	-54.1077									36.5	-311.938
36.55	-54.6265	-54.3213	-54.9316	-55.542	-54.0161	-54.2297	-54.2602									36.55	-311.771
36.6	-54.5349	-54.3213	-55.2063	-55.5725	-54.3518	-54.4739	-54.0161									36.6	-312.048
36.65	-54.5654	-53.9551	-55.1147	-55.542	-54.2297	-54.4739	-54.2602									36.65	-312.659
36.7	-54.779	-54.4128	-55.0842	-55.4199	-53.9551	-54.4128	-54.2297									36.7	-313.824
36.75	-54.6265	-54.3213	-54.718	-55.5115	-54.3213	-54.3213	-54.0771									36.75	-314.823
36.8	-54.5654	-54.0466	-55.1453	-55.3284	-54.2602	-54.5349	-54.3213									36.8	-317.264
36.85	-54.4739	-54.4128	-55.1147	-55.603	-53.9856	-54.6265	-54.0771									36.85	-319.484
36.9	-54.779	-54.3823	-55.1147	-55.2368	-54.1992	-54.4739	-54.2602									36.9	-321.592
36.95	-54.6265	-54.1382	-54.9622	-55.481	-54.2908	-54.3823	-54.2908									36.95	-324.422
37	-54.5959	-54.3518	-54.8706	-55.2063	-53.9856	-54.718	-54.0466									37	-326.752
37.05	-54.5044	-54.3213	-55.1453	-55.5725	-54.2297	-54.5654	-54.3518									37.05	-328.639
37.1	-54.7485	-54.1382	-55.0842	-55.2673	-54.1077	-54.5044	-54.1992									37.1	-330.359
37.15	-54.7485	-54.4128	-55.0537	-55.542	-54.0161	-54.3823	-54.2908									37.15	-331.247
37.2	-54.718	-54.3213	-54.8096	-55.542	-54.1382	-54.6265	-54.3823									37.2	-331.247
37.25	-54.5349	-54.0771	-55.0537	-55.481	-54.1687	-54.5654	-54.1382									37.25	-330.359
37.3	-54.718	-54.3823	-55.1758	-55.5115	-54.1077	-54.4739	-54.3518									37.3	-329.138
37.35	-54.7485	-54.2908	-55.0842	-55.2673	-53.9856	-54.3823	-54.4434									37.35	-326.863
37.4	-54.779	-54.0771	-55.0537	-55.542	-54.2602	-54.6265	-54.1382									37.4	-323.423
37.45	-54.657	-54.4128	-54.9316	-55.3894	-54.1382	-54.6265	-54.3823									37.45	-320.704
37.5	-54.5654	-54.2908	-55.0537	-55.5115	-53.9856	-54.5044	-54.2908									37.5	-316.155
37.55	-54.718	-54.0161	-55.2063	-55.5115	-54.2297	-54.2297	-54.1077									37.55	-311.938
37.6	-54.8096	-54.3823	-55.1147	-55.3284	-54.2602	-54.5959	-54.4128									37.6	-307.998
37.65	-54.7485	-54.3518	-55.1453	-55.481	-54.0161	-54.5959	-54.2908									37.65	-305.335
37.7	-54.5349	-54.0466	-54.9316	-55.2368	-54.1687	-54.6265	-54.1382									37.7	-302.172
37.75	-54.657	-54.4739	-55.0232	-55.481	-54.1382	-54.5044	-54.3213									37.75	-300.452
37.8	-54.779	-54.3823	-55.1147	-55.481	-54.1382	-54.6265	-54.2297									37.8	-300.008
37.85	-54.6875	-54.1687	-55.1453	-55.1758	-54.0466	-54.718	-54.2908									37.85	-300.285
37.9	-54.6875	-54.3213	-55.1453	-55.542	-54.1992	-54.6875	-54.2908									37.9	-301.617
37.95	-54.4739	-54.4739	-54.9622	-55.3284	-54.1382	-54.5349	-54.0466									37.95	-303.836
38	-54.5654	-54.2908	-54.9011	-55.3894	-53.894	-54.4434	-54.3518									38	-307.332
38.05	-54.779	-54.1687	-55.1147	-55.5725	-54.2602	-54.779	-54.3213									38.05	-310.162
38.1	-54.779	-54.4434	-55.1758	-55.1453	-54.1687	-54.6265	-54.0466									38.1	-313.824
38.15	-54.718	-54.3518	-55.0842	-55.5725	-54.0466	-54.6265	-54.3823									38.15	-317.042
38.2	-54.4739	-54.0771	-54.9316	-55.4199	-54.0466	-54.4739	-54.3823									38.2	-319.761
38.25	-54.6265	-54.4128	-54.8401	-55.2978	-54.2908	-54.5349	-54.1077									38.25	-322.757
38.3	-54.8706	-54.2602	-55.2063	-55.542	-54.1992	-54.6875	-54.3823									38.3	-324.921
38.35	-54.8401	-54.1077	-55.1758	-55.3284	-53.9246	-54.5654	-54.3213									38.35	-326.309
38.4	-54.657	-54.2602	-54.9927	-55.3894	-54.2297	-54.5959	-54.0466									38.4	-327.307
38.45	-54.4739	-54.4128	-55.0232	-55.542	-54.2908	-54.3518	-54.4128									38.45	-327.862
38.5	-54.5654	-54.2908	-55.2673	-55.3284	-54.1687	-54.657	-54.4128									38.5	-327.252
38.55	-54.779	-54.1077	-55.1147	-55.5115	-53.9551	-54.6265	-54.0161									38.55	-326.309
38.6	-54.718	-54.3518	-54.9622	-55.481	-54.2908	-54.6265	-54.4434									38.6	-325.587
38.65	-54.7485	-54.3518	-55.1758	-55.1758	-54.2297	-54.5044	-54.3213									38.65	-324.145
38.7	-54.5959	-54.1382	-55.0537	-55.5725	-54.1687	-54.2908	-54.1077									38.7	-322.868
38.75	-54.4128	-54.3518	-55.2063	-55.5115	-54.1077	-54.657	-54.3518									38.75	-321.981
38.8	-54.6875	-54.4128	-55.1453	-55.1453	-54.2602	-54.657	-54.3518									38.8	-321.037
38.85	-54.779	-54.3823	-54.8096	-55.542	-54.1687	-54.7485	-54.1687									38.85	-320.427
38.9	-54.718	-54.1077	-55.1758	-55.4199	-54.0161	-54.5654	-54.2908									38.9	-319.428
38.95	-54.718	-54.4434	-54.9011	-55.2978	-54.1992	-54.4128	-54.3518									38.95	-318.929
39	-54.4128	-54.4128	-55.2063	-55.5115	-54.1687	-54.5349	-54.1687									39	-318.097
39.05	-54.718	-54.1077	-55.0232	-55.3589	-54.1992	-54.779	-54.3823									39.05	-317.209
39.1	-54.718	-54.2602	-55.1147	-55.3284	-53.9856	-54.657	-54.3518									39.1	-316.099
39.15	-54.657	-54.3823	-55.0842	-55.481	-54.2297	-54.5349	-54.2602									39.15	-314.712
39.2	-54.5959	-54.3518	-54.9622	-55.3589	-54.1687	-54.3823	-54.3213									39.2	-312.881
39.25	-54.779	-54.0161	-55.0842	-55.3589	-54.1077	-54.5959	-54.5349									39.25	-310.994
39.3	-54.657	-54.3518	-54.7485	-55.5725	-54.0161	-54.718	-54.5044									39.3	-308.497
39.35	-54.6265	-54.2908	-55.1758	-55.3894	-54.2602	-54.5654	-54.0466									39.35	-306.5
39.4	-54.779	-54.1382	-54.779	-55.3589	-54.1992	-54.5959	-54.4739									39.4	-303.947
39.45	-54.5959	-54.0466	-55.1453	-55.5115	-54.2297	-54.4434	-54.4739									39.45	-301.894
39.5	-54.779	-54.2908	-54.9622	-55.3894	-54.0466	-54.4739	-54.1077									39.5	-299.73
39.55	-54.8401	-54.2602	-55.2368	-55.4199	-54.2602	-54.6875	-54.3823									39.55	-298.954
39.6	-54.5654	-54.1687	-55.2063	-55.5115	-54.2602	-54.5654	-54.3823									39.6	-298.232
39.65	-54.779	-54.1687	-54.9622	-55.3284	-54.2908	-54.5349	-54.2908									39.65	-299.12
39.7	-54.4434	-54.3518	-55.0232	-55.3589	-54.1077	-54.4128	-54.2908									39.7	-300.729
39.75	-54.8096	-54.3518	-54.8096	-55.481	-54.2297	-54.657	-54.5044									39.75	-303.615
39.8	-54.657	-54.2297	-55.2063	-55.3284	-54.3213	-54.5654	-54.3213									39.8	-308.83
39.85	-54.718	-54.1382	-55.0537	-55.2978	-54.2297	-54.1992	-54.0771									39.85	-314.601
39.9	-54.5959	-54.4434	-55.0842	-55.4199	-54.1687	-54.718	-54.4128									39.9	-321.426
39.95	-54.5654	-54.2602	-55.1147	-55.3284	-54.1077	-54.5959	-54.3823									39.95	-329.582
40	-54.779	-54.1687	-54.8401	-55.2063	-54.4128	-54.3518	-54.1077									40	-337.905
40.05	-54.4128	-54.1077	-55.2063	-55.481	-54.2908	-54.657	-54.2908									40.05	-347.005
40.1	-54.779	-54.4434	-54.9622	-55.4504	-54.1687	-54.4739	-54.4434									40.1	-356.382
40.15	-54.4739	-54.2908	-54.9622	-55.2368	-53.9856	-54.6875	-54.3213									40.15	-364.705
40.2	-54.8401	-54.3213	-55.0537	-55.603	-54.2602	-54.5654	-54.0771									40.2	-373.028
40.25	-54.6265	-54.0771	-54.8096	-55.481	-54.2602	-54.3823	-54.3823									40.25	-380.685
40.3	-54.718	-54.4128	-55.0842	-55.1453	-54.2602	-54.6265	-54.3213									40.3	-386.733
40.35	-54.6875	-54.3518	-55.0842	-55.542	-54.1687	-54.3518	-54.2602									40.35	-392.171
40.4	-54.5654	-54.2297	-54.779	-55.542	-54.0771	-54.5959	-54.1687									40.4	-395.722
40.45	-54.7485	-54.0466	-55.1147	-55.2063	-54.3518	-54.4128	-54.2908									40.45	-397.664
40.5	-54.4739	-54.2908	-55.0232	-55.4504	-54.2297	-54.6265	-54.3823									40.5	-397.942
40.55	-54.7485	-54.3823	-54.8706	-55.5115	-54.3213	-54.5044	-54.0466									40.55	-397.276
40.6	-54.657	-54.2908	-55.0537	-55.4504	-54.1382	-54.5959	-54.3213									40.6	-395.889
40.65	-54.5959	-54.0771	-54.9622	-55.2978	-54.1992	-54.5349	-54.2908									40.65	-393.059
40.7	-54.5959	-54.1992	-54.9011	-55.542	-54.3213	-54.3823	-54.2297									40.7	-389.674
40.75	-54.4434	-54.4128	-55.0232	-55.542	-54.3518	-54.5654	-54.0161									40.75	-385.235
40.8	-54.718	-54.3213	-54.9316	-55.1453	-54.2908	-54.2602	-54.3213									40.8	-380.852
40.85	-54.5959	-54.2297	-55.0537	-55.5725	-53.9551	-54.5959	-54.2297									40.85	-376.579
40.9	-54.4128	-54.0466	-55.0232	-55.4199	-54.1687	-54.3213	-54.1077									40.9	-371.586
40.95	-54.6875	-54.3823	-54.779	-55.2978	-54.3823	-54.6875	-54.1077									40.95	-366.814
41	-54.5044	-54.4128	-54.9316	-55.4504	-54.2908	-54.5349	-54.2602									41	-362.097
41.05	-54.5959	-54.3518	-54.9622	-55.6335	-54.1992	-54.4739	-54.3213									41.05	-357.714
41.1	-54.6265	-54.2602	-54.779	-55.5725	-53.9856	-54.5349	-54.1687									41.1	-352.998
41.15	-54.3823	-54.0771	-54.9622	-55.2673	-54.1077	-54.3213	-54.1382									41.15	-348.614
41.2	-54.657	-54.3823	-54.9927	-55.6335	-54.3213	-54.7485	-54.3518									41.2	-344.564
41.25	-54.7485	-54.3518	-54.6875	-55.6335	-54.2908	-54.3823	-54.3213									41.25	-341.068
41.3	-54.3823	-54.3213	-55.0232	-55.4504	-54.1992	-54.5044	-54.1992									41.3	-337.85
41.35	-54.779	-54.1382	-54.9622	-55.3894	-53.9246	-54.5959	-54.1077									41.35	-334.853
41.4	-54.718	-54.1687	-54.657	-55.7251	-54.1382	-54.2908	-54.4128									41.4	-332.301
41.45	-54.5654	-54.3518	-55.0537	-55.6641	-54.3518	-54.657	-54.2297									41.45	-330.803
41.5	-54.8706	-54.2602	-54.9927	-55.2978	-54.2908	-54.5044	-54.1382									41.5	-329.804
41.55	-54.6875	-54.3823	-54.6875	-55.6335	-54.2602	-54.3823	-54.0771									41.55	-328.916
41.6	-54.5044	-54.1687	-55.0232	-55.603	-54.2908	-54.5654	-54.3518									41.6	-328.306
41.65	-54.7485	-54.0466	-55.0232	-55.5725	-54.0466	-54.3518	-54.2908									41.65	-328.805
41.7	-54.718	-54.2602	-54.9011	-55.3894	-54.1992	-54.5654	-54.1382									41.7	-330.581
41.75	-54.5044	-54.5044	-54.9316	-55.5725	-54.3823	-54.5959	-53.9551									41.75	-332.412
41.8	-54.718	-54.3823	-55.0232	-55.5725	-54.2908	-54.3518	-54.2602									41.8	-335.741
41.85	-54.6265	-54.1687	-54.7485	-55.481	-54.3823	-54.657	-54.3518									41.85	-339.348
41.9	-54.5044	-54.1382	-54.9622	-55.5115	-54.1687	-54.5959	-54.1687									41.9	-342.566
41.95	-54.8096	-54.4128	-54.9316	-55.6335	-54.0466	-54.3518	-53.9856									41.95	-346.894
42	-54.6265	-54.4739	-54.8401	-55.542	-54.3213	-54.6875	-54.1992									42	-351.056
42.05	-54.5349	-54.2908	-54.8096	-55.481	-54.2908	-54.5654	-54.3518									42.05	-354.329
42.1	-54.718	-54.0161	-54.9927	-55.481	-54.2908	-54.5044	-54.2908									42.1	-358.324
42.15	-54.657	-54.3213	-54.9316	-55.6641	-53.9551	-54.6265	-54.1382									42.15	-362.375
42.2	-54.5349	-54.3518	-54.6265	-55.6335	-54.1992	-54.5349	-54.0466									42.2	-365.205
42.25	-54.718	-54.1687	-55.0232	-55.5115	-54.3213	-54.5959	-54.2908									42.25	-368.423
42.3	-54.718	-54.1077	-54.9316	-55.542	-54.1687	-54.6265	-54.2908									42.3	-370.309
42.35	-54.5654	-54.2908	-54.5654	-55.6946	-54.1077	-54.4434	-54.2602									42.35	-372.085
42.4	-54.779	-54.1077	-54.9316	-55.603	-54.2908	-54.5349	-54.1687									42.4	-372.362
42.45	-54.6875	-54.2602	-54.9011	-55.481	-54.2297	-54.6875	-54.1992									42.45	-372.751
42.5	-54.5349	-54.3213	-54.718	-55.542	-54.1687	-54.4128	-54.2908									42.5	-371.974
42.55	-54.8096	-53.9856	-54.8706	-55.6335	-54.2602	-54.5349	-54.2297									42.55	-370.198
42.6	-54.657	-54.4434	-54.9316	-55.6335	-53.9856	-54.5349	-54.2297									42.6	-367.535
42.65	-54.4434	-54.2602	-54.8706	-55.5115	-54.3518	-54.3518	-53.9551									42.65	-363.54
42.7	-54.8401	-54.3213	-54.779	-55.4199	-54.2602	-54.5959	-54.2297									42.7	-359.268
42.75	-54.657	-54.2602	-55.0842	-55.6641	-54.1687	-54.6265	-54.3518									42.75	-354.718
42.8	-54.4128	-54.1687	-54.9316	-55.5115	-54.2908	-54.2602	-54.2297									42.8	-349.613
42.85	-54.6265	-54.3213	-54.6875	-55.4199	-54.0771	-54.657	-54.1687									42.85	-344.952
42.9	-54.6875	-54.0771	-54.9316	-55.3589	-54.3518	-54.5959	-54.0771									42.9	-339.958
42.95	-54.657	-54.2908	-54.9622	-55.5115	-53.9551	-54.5044	-54.2602									42.95	-334.964
43	-54.5654	-54.0466	-54.8401	-55.6335	-54.1992	-54.657	-54.2908									43	-329.86
43.05	-54.718	-54.5044	-54.657	-55.481	-54.0771	-54.718	-54.3518									43.05	-326.031
43.1	-54.5959	-53.9856	-54.9622	-55.3284	-54.2908	-54.5654	-54.0161									43.1	-321.315
43.15	-54.4434	-54.3518	-54.8706	-55.4504	-54.2908	-54.5959	-54.3823									43.15	-316.987
43.2	-54.718	-54.2297	-54.6875	-55.6335	-54.1992	-54.657	-54.3823									43.2	-313.047
43.25	-54.7485	-54.3518	-54.8096	-55.603	-54.2297	-54.5654	-54.1382									43.25	-309.663
43.3	-54.5654	-54.3213	-54.8401	-55.481	-54.0466	-54.5349	-54.4128									43.3	-306
43.35	-54.779	-54.1992	-54.779	-55.3589	-54.2297	-54.8096	-54.2908									43.35	-302.893
43.4	-54.8096	-54.2602	-54.5959	-55.542	-53.9856	-54.5959	-54.1077									43.4	-299.73
43.45	-54.6265	-53.9856	-54.9011	-55.5725	-54.2908	-54.4739	-54.4739									43.45	-296.79
43.5	-54.5349	-54.3518	-54.8096	-55.5725	-54.2297	-54.6875	-54.3823									43.5	-294.681
43.55	-54.8096	-53.9856	-54.8096	-55.4199	-54.1687	-54.7485	-54.0771									43.55	-291.907
43.6	-54.8096	-54.2602	-54.6875	-55.3284	-54.1992	-54.3518	-54.3518									43.6	-289.521
43.65	-54.4739	-54.2602	-54.9927	-55.542	-54.0161	-54.6875	-54.0466									43.65	-287.745
43.7	-54.657	-54.0771	-54.9316	-55.542	-54.3518	-54.7485	-54.3213									43.7	-285.249
43.75	-54.779	-54.2908	-54.779	-55.481	-54.2602	-54.4739	-54.1992									43.75	-283.695
43.8	-54.5959	-54.0161	-54.8706	-55.3284	-54.0466	-54.657	-54.3213									43.8	-281.198
43.85	-54.4739	-54.3518	-54.8706	-55.3589	-54.2602	-54.657	-54.1992									43.85	-280.31
43.9	-54.7485	-54.2908	-54.9011	-55.5725	-54.0466	-54.5654	-54.3823									43.9	-278.424
43.95	-54.718	-54.0466	-54.6875	-55.5115	-54.2602	-54.5044	-54.3823									43.95	-276.315
44	-54.5349	-54.2602	-54.9011	-55.4504	-54.3213	-54.6875	-54.1687									44	-275.205
44.05	-54.6265	-54.1077	-55.0232	-55.2673	-53.9246	-54.657	-54.3518									44.05	-273.707
44.1	-54.7485	-54.3213	-54.9011	-55.5115	-54.3213	-54.4128	-54.1992									44.1	-272.931
44.15	-54.5959	-54.2297	-54.657	-55.5115	-54.2297	-54.779	-54.4128									44.15	-271.377
44.2	-54.5044	-53.9246	-54.8401	-55.3894	-54.0466	-54.5654	-54.1077									44.2	-270.267
44.25	-54.718	-54.2908	-54.9622	-55.3284	-54.2602	-54.5044	-54.4128									44.25	-268.492
44.3	-54.657	-54.2297	-54.9011	-55.542	-54.0771	-54.5044	-54.0466									44.3	-266.716
44.35	-54.6265	-54.0771	-54.7485	-55.542	-54.1077	-54.7485	-54.5044									44.35	-264.719
44.4	-54.4739	-54.2297	-54.8706	-55.4199	-54.2602	-54.6265	-54.2297									44.4	-262.998
44.45	-54.779	-54.1077	-54.9927	-55.5115	-54.0771	-54.3518	-54.4739									44.45	-261.112
44.5	-54.6875	-54.1687	-54.9316	-55.2978	-54.1382	-54.6875	-54.3823									44.5	-259.669
44.55	-54.6265	-54.1687	-54.779	-55.6335	-54.3213	-54.6265	-54.3213									44.55	-257.727
44.6	-54.4434	-53.9246	-54.8401	-55.5115	-54.1077	-54.4739	-54.3213									44.6	-256.007
44.65	-54.7485	-54.1992	-55.0537	-55.4199	-54.1382	-54.4434	-54.0466									44.65	-254.287
44.7	-54.657	-54.2602	-54.8706	-55.4504	-54.1992	-54.6265	-54.4128									44.7	-252.511
44.75	-54.5349	-53.9856	-54.8096	-55.2673	-54.1077	-54.657	-54.2297									44.75	-251.124
44.8	-54.4128	-54.2908	-54.718	-55.5115	-54.2908	-54.3518	-54.3518									44.8	-249.404
44.85	-54.657	-54.2297	-55.0232	-55.2063	-54.2602	-54.5654	-54.3823									44.85	-248.128
44.9	-54.657	-53.9856	-54.9622	-55.481	-54.0771	-54.6265	-54.0466									44.9	-246.852
44.95	-54.4739	-54.3823	-54.9011	-55.2978	-54.1992	-54.5959	-54.3823									44.95	-245.576
45	-54.3213	-54.2602	-54.657	-55.542	-54.2602	-54.4128	-54.1687									45	-244.41
45.05	-54.6265	-53.9551	-54.8401	-55.3589	-54.0771	-54.6875	-54.4128									45.05	-243.523
45.1	-54.5959	-54.2908	-54.9927	-55.481	-54.2297	-54.6875	-54.3213									45.1	-242.746
45.15	-54.5044	-54.1687	-54.8401	-55.3589	-54.2908	-54.5654	-54.1077									45.15	-241.581
45.2	-54.2602	-53.9856	-54.8096	-55.542	-54.0771	-54.4434	-54.4434									45.2	-241.026
45.25	-54.6875	-54.2297	-54.657	-55.481	-54.2297	-54.657	-54.3213									45.25	-240.915
45.3	-54.657	-54.1077	-54.9622	-55.3284	-54.2297	-54.5959	-54.2908									45.3	-240.36
45.35	-54.657	-54.0161	-54.9622	-55.5115	-54.1382	-54.5349	-54.3518									45.35	-239.916
45.4	-54.3823	-54.2602	-54.8706	-55.3589	-54.1077	-54.3823	-54.2908									45.4	-239.028
45.45	-54.5959	-54.0466	-54.779	-55.603	-54.3823	-54.657	-54.3213									45.45	-239.028
45.5	-54.7485	-53.9856	-54.779	-55.2063	-54.2297	-54.5044	-54.4128									45.5	-238.362
45.55	-54.657	-54.1382	-54.9927	-55.603	-54.0161	-54.4739	-54.1382									45.55	-237.808
45.6	-54.4739	-54.0466	-54.9622	-55.3589	-54.3518	-54.3518	-54.4739									45.6	-237.419
45.65	-54.3823	-53.894	-54.9622	-55.5725	-54.3213	-54.6875	-54.2908									45.65	-237.197
45.7	-54.6875	-54.2297	-54.6875	-55.5115	-54.0466	-54.5654	-54.2602									45.7	-236.753
45.75	-54.6265	-54.1992	-54.657	-55.2063	-54.2908	-54.4434	-54.3518									45.75	-235.921
45.8	-54.5349	-53.9246	-54.9927	-55.5115	-54.3518	-54.3518	-54.2908									45.8	-235.644
45.85	-54.3823	-54.2297	-54.9622	-55.2368	-54.1992	-54.6265	-54.3823									45.85	-234.922
45.9	-54.5044	-54.1382	-54.9622	-55.542	-54.1687	-54.5959	-54.4128									45.9	-233.923
45.95	-54.7485	-53.894	-54.6875	-55.481	-54.2297	-54.4739	-54.0161									45.95	-233.424
46	-54.5349	-54.2908	-54.7485	-55.2368	-54.0771	-54.3213	-54.3823									46	-232.536
46.05	-54.5044	-54.1382	-54.9011	-55.5725	-54.0466	-54.6265	-54.4128									46.05	-231.926
46.1	-54.3518	-53.8635	-54.8096	-55.3284	-54.2908	-54.5959	-54.1077									46.1	-231.427
46.15	-54.5349	-54.2602	-54.8096	-55.5115	-54.1992	-54.5959	-54.4128									46.15	-230.65
46.2	-54.6875	-54.2602	-54.5959	-55.5115	-54.0161	-54.3823	-54.4739									46.2	-229.762
46.25	-54.5349	-53.894	-54.5654	-55.3589	-54.1992	-54.5349	-54.1687									46.25	-229.54
46.3	-54.5959	-54.0771	-54.7485	-55.603	-54.2602	-54.657	-54.4739									46.3	-228.541
46.35	-54.3823	-54.1687	-54.8706	-55.481	-54.0771	-54.5959	-54.3823									46.35	-226.988
46.4	-54.5654	-54.1077	-54.8401	-55.481	-54.0771	-54.5044	-54.3213									46.4	-226.1
46.45	-54.718	-53.9856	-54.718	-55.6335	-54.2602	-54.3213	-54.5044									46.45	-224.935
46.5	-54.657	-54.1077	-54.5959	-55.3894	-54.1687	-54.6265	-54.3518									46.5	-224.213
46.55	-54.5959	-54.0161	-54.779	-55.5725	-53.8635	-54.6265	-54.1992									46.55	-222.826
46.6	-54.3823	-53.772	-54.8401	-55.542	-54.2297	-54.5654	-54.5349									46.6	-222.549
46.65	-54.5349	-54.1382	-54.8096	-55.2978	-54.2602	-54.3518	-54.3823									46.65	-221.661
46.7	-54.779	-54.2297	-54.6265	-55.7251	-54.0771	-54.3823	-54.2908									46.7	-221.051
46.75	-54.657	-53.772	-54.779	-55.481	-54.1687	-54.6265	-54.4128									46.75	-220.718
46.8	-54.5959	-54.1687	-54.779	-55.3284	-54.2908	-54.5959	-54.3518									46.8	-220.052
46.85	-54.4128	-54.1382	-54.718	-55.5725	-54.2908	-54.6265	-54.1992									46.85	-219.164
46.9	-54.4739	-54.0771	-54.718	-55.4504	-54.0161	-54.4128	-54.4739									46.9	-218.443
46.95	-54.6265	-53.894	-54.8401	-55.5725	-54.1687	-54.5349	-54.2908									46.95	-217.888
47	-54.657	-54.2297	-54.6265	-55.4504	-54.1992	-54.7485	-54.1992									47	-217.444
47.05	-54.5959	-54.1077	-54.6875	-55.2368	-54.1382	-54.6875	-54.5044									47.05	-217.499
47.1	-54.4434	-53.8025	-54.779	-55.5115	-53.9246	-54.6875	-54.3518									47.1	-217.389
47.15	-54.4128	-54.0161	-54.3518	-55.481	-54.2297	-54.4434	-54.1382									47.15	-217.389
47.2	-54.6265	-54.1992	-54.8706	-55.2063	-54.0771	-54.6265	-54.4434									47.2	-217.666
47.25	-54.6875	-54.0771	-54.5654	-55.6335	-53.9551	-54.8401	-54.4739									47.25	-217.832
47.3	-54.657	-53.8025	-54.718	-55.6335	-54.0161	-54.779	-54.1077									47.3	-218.276
47.35	-54.4739	-54.1382	-54.7485	-55.3589	-54.1992	-54.6265	-54.4739									47.35	-218.332
47.4	-54.657	-54.0771	-54.657	-55.603	-54.1382	-54.5349	-54.4739									47.4	-218.72
47.45	-54.7485	-53.9246	-54.779	-55.5725	-53.9551	-54.6265	-54.1992									47.45	-219.552
47.5	-54.7485	-54.0161	-54.5044	-55.4504	-53.9246	-54.779	-54.4739									47.5	-219.331
47.55	-54.5349	-54.1382	-54.8401	-55.6335	-54.1687	-54.7485	-54.3823									47.55	-220.496
47.6	-54.8401	-54.0466	-54.5349	-55.5115	-54.1382	-54.6875	-54.2908									47.6	-221.162
47.65	-54.6875	-53.9551	-54.8401	-55.2978	-53.9856	-54.5959	-54.3823									47.65	-221.994
47.7	-54.4434	-54.0161	-54.6265	-55.6946	-54.1077	-54.4739	-54.5044									47.7	-222.049
47.75	-54.779	-54.1382	-54.9316	-55.5115	-54.2602	-54.718	-54.3823									47.75	-222.493
47.8	-54.6875	-54.0466	-54.779	-55.2978	-54.1382	-54.779	-54.2297									47.8	-223.658
47.85	-54.657	-53.894	-54.657	-55.5725	-54.0466	-54.6875	-54.4434									47.85	-223.658
47.9	-54.6875	-54.1382	-54.779	-55.4504	-53.9246	-54.5959	-54.4128									47.9	-224.99
47.95	-54.3823	-54.1687	-54.6265	-55.2063	-54.2602	-54.5959	-54.1992									47.95	-225.379
48	-54.657	-54.1382	-54.8401	-55.5725	-54.1077	-54.779	-54.4434									48	-225.933
48.05	-54.4739	-53.9246	-54.5044	-55.4504	-53.9551	-54.7485	-54.3823									48.05	-226.155
48.1	-54.718	-54.2602	-54.8096	-55.1758	-53.8635	-54.5654	-54.2602									48.1	-227.21
48.15	-54.657	-54.1687	-54.6875	-55.603	-54.1382	-54.8706	-54.3518									48.15	-227.654
48.2	-54.718	-54.1382	-54.5959	-55.542	-54.1687	-54.8096	-54.4739									48.2	-228.097
48.25	-54.6875	-53.894	-54.7485	-55.2063	-54.0161	-54.5654	-54.3213									48.25	-228.985
48.3	-54.5349	-54.2602	-54.4739	-55.5725	-53.772	-54.9011	-54.2908									48.3	-229.096
48.35	-54.7485	-54.1382	-54.779	-55.603	-54.1077	-54.9011	-54.5654									48.35	-229.152
48.4	-54.5654	-54.0771	-54.7485	-55.2978	-54.1382	-54.6265	-54.4434									48.4	-229.817
48.45	-54.8706	-53.894	-54.5654	-55.542	-54.0771	-54.8096	-54.2908									48.45	-230.039
48.5	-54.4434	-54.1382	-54.779	-55.542	-53.8025	-54.657	-54.4739									48.5	-230.539
48.55	-54.8096	-54.1687	-54.5044	-55.3894	-54.0161	-54.8706	-54.5959									48.55	-230.872
48.6	-54.6265	-54.1382	-54.8401	-55.5115	-54.1992	-54.779	-54.4434									48.6	-231.649
48.65	-54.8401	-53.894	-54.779	-55.481	-54.0771	-54.6875	-54.2602									48.65	-232.148
48.7	-54.7485	-54.1992	-54.4128	-55.4504	-54.0466	-54.8096	-54.5959									48.7	-233.258
48.75	-54.5959	-54.2602	-54.7485	-55.3589	-53.772	-54.5959	-54.5044									48.75	-233.757
48.8	-54.779	-54.0771	-54.8096	-55.603	-54.1077	-54.8096	-54.3823									48.8	-234.201
48.85	-54.4128	-54.0161	-54.5044	-55.481	-54.0771	-54.4739	-54.2602									48.85	-234.756
48.9	-54.7485	-54.0466	-54.8096	-55.2368	-54.1077	-54.9011	-54.5044									48.9	-235.477
48.95	-54.6265	-54.2297	-54.6875	-55.542	-54.0161	-54.6265	-54.4128									48.95	-235.588
49	-54.5654	-54.0771	-54.657	-55.481	-53.894	-54.9011	-54.1992									49	-236.642
49.05	-54.718	-54.1077	-54.8096	-55.2368	-54.0771	-54.718	-54.3823									49.05	-237.364
49.1	-54.5044	-53.894	-54.6265	-55.481	-54.0771	-54.9011	-54.4128									49.1	-238.695
49.15	-54.779	-54.1382	-54.6875	-55.481	-54.0771	-54.8401	-54.5349									49.15	-239.472
49.2	-54.718	-54.1687	-54.779	-55.4199	-53.8635	-54.779	-54.1687									49.2	-240.637
49.25	-54.5959	-54.1992	-54.5654	-55.2978	-53.8635	-54.7485	-54.3823									49.25	-241.914
49.3	-54.7485	-54.0161	-54.6875	-55.5725	-54.0161	-54.5959	-54.4434									49.3	-242.08
49.35	-54.657	-53.9856	-54.718	-55.5115	-54.0161	-54.9011	-54.5044									49.35	-242.69
49.4	-54.7485	-54.1382	-54.5654	-55.2978	-53.9856	-54.6875	-54.2602									49.4	-243.245
49.45	-54.779	-54.0466	-54.779	-55.481	-53.9246	-54.8706	-54.5044									49.45	-243.301
49.5	-54.5654	-54.1077	-54.7485	-55.481	-53.8025	-54.779	-54.5654									49.5	-243.523
49.55	-54.7485	-53.8635	-54.4434	-55.4199	-54.0466	-54.6265	-54.5349									49.55	-242.579
49.6	-54.8401	-53.9856	-54.718	-55.2368	-54.1992	-54.8401	-54.3518									49.6	-242.801
49.65	-54.4434	-54.1687	-54.8401	-55.6335	-54.0771	-54.5959	-54.4434									49.65	-242.413
49.7	-54.9011	-54.0161	-54.5349	-55.4504	-53.9246	-54.779	-54.5044									49.7	-242.08
49.75	-54.6875	-54.1077	-54.8096	-55.1453	-53.833	-54.779	-54.5044									49.75	-241.414
49.8	-54.5044	-53.9246	-54.7485	-55.4199	-53.9856	-54.5349	-54.1992									49.8	-240.415
49.85	-54.8401	-53.9856	-54.718	-55.542	-54.2297	-54.8401	-54.5044									49.85	-239.694
49.9	-54.6875	-54.1382	-54.8706	-55.4504	-54.0771	-54.657	-54.5349									49.9	-238.362
49.95	-54.6265	-54.0771	-54.718	-55.0842	-54.1077	-54.8096	-54.5044									49.95	-236.198
50	-54.6875	-54.1687	-54.6265	-55.4504	-53.9856	-54.8401	-54.2602									50	-235.588
50.05	-54.5349	-53.8635	-54.718	-55.3894	-53.833	-54.4739	-54.3518									50.05	-234.034
50.1	-54.5959	-53.9551	-54.779	-55.3589	-54.0466	-54.8706	-54.5654									50.1	-232.203
50.15	-54.7485	-54.1687	-54.657	-55.0842	-54.0771	-54.7485	-54.5044									50.15	-230.983
50.2	-54.6265	-54.1992	-54.5654	-55.3589	-54.0466	-54.5959	-54.3518									50.2	-229.984
50.25	-54.6265	-54.0771	-54.779	-55.4199	-54.0161	-54.9927	-54.3213									50.25	-229.096
50.3	-54.779	-53.894	-54.718	-55.2978	-53.833	-54.779	-54.5654									50.3	-228.097
50.35	-54.5959	-53.9551	-54.5654	-55.2368	-53.9856	-54.718	-54.4739									50.35	-228.042
50.4	-54.657	-54.1992	-54.779	-55.4199	-54.1382	-54.8706	-54.5654									50.4	-227.099
50.45	-54.6875	-54.1077	-54.7485	-55.5115	-54.1382	-54.7485	-54.2908									50.45	-227.432
50.5	-54.6265	-53.833	-54.5349	-55.2673	-53.9551	-54.6875	-54.4434									50.5	-227.487
50.55	-54.7485	-54.0466	-54.779	-55.2063	-54.0466	-54.7485	-54.5959									50.55	-227.154
50.6	-54.657	-54.0771	-54.7485	-55.4199	-54.1992	-54.657	-54.5959									50.6	-227.709
50.65	-54.6265	-53.9856	-54.5654	-55.4504	-54.1382	-54.8096	-54.5044									50.65	-227.654
50.7	-54.6265	-53.9856	-54.7485	-55.2978	-53.894	-54.9011	-54.2602									50.7	-228.153
50.75	-54.8096	-54.0466	-54.7485	-55.1147	-54.1382	-54.657	-54.4739									50.75	-228.763
50.8	-54.5959	-53.8635	-54.6875	-55.4504	-54.0466	-54.8096	-54.5349									50.8	-229.263
50.85	-54.5654	-54.1077	-54.6265	-55.3284	-54.0771	-54.9011	-54.5349									50.85	-230.539
50.9	-54.8096	-54.0771	-54.8706	-55.2368	-54.1687	-54.5349	-54.3213									50.9	-231.205
50.95	-54.657	-53.8635	-54.779	-55.1453	-53.894	-54.8706	-54.3518									50.95	-232.203
51	-54.5044	-54.1382	-54.4128	-55.4504	-54.1687	-54.779	-54.5044									51	-232.925
51.05	-54.8096	-53.7109	-54.8096	-55.2978	-54.1382	-54.5959	-54.5044									51.05	-234.811
51.1	-54.6875	-54.1077	-54.7485	-55.3589	-54.0771	-54.9011	-54.5959									51.1	-235.755
51.15	-54.4434	-53.894	-54.657	-54.9927	-54.1687	-54.8706	-54.2908									51.15	-236.309
51.2	-54.8096	-54.1992	-54.657	-55.3589	-53.833	-54.5959	-54.3213									51.2	-236.975
51.25	-54.8096	-54.0771	-54.718	-55.2978	-54.1077	-54.9316	-54.657									51.25	-237.641
51.3	-54.5349	-54.1077	-54.657	-55.3894	-53.833	-54.8706	-54.5044									51.3	-237.919
51.35	-54.8401	-54.0771	-54.3823	-55.0232	-54.1992	-54.6265	-54.3823									51.35	-236.92
51.4	-54.779	-53.9551	-54.5959	-55.1758	-53.9856	-54.9316	-54.4128									51.4	-236.309
51.45	-54.6265	-54.0771	-54.718	-55.3894	-54.0771	-54.9011	-54.657									51.45	-235.366
51.5	-54.657	-53.8025	-54.5044	-55.3589	-54.1687	-54.657	-54.6265									51.5	-234.312
51.55	-54.8401	-54.0771	-54.5654	-55.2978	-54.0466	-54.779	-54.2908									51.55	-232.37
51.6	-54.8096	-53.772	-54.718	-55.0842	-54.1687	-54.779	-54.5044									51.6	-230.261
51.65	-54.4739	-54.1382	-54.6875	-55.3589	-53.9246	-54.718	-54.5654									51.65	-228.153
51.7	-54.779	-53.9551	-54.3823	-55.4504	-54.2602	-54.7485	-54.2908									51.7	-225.323
51.75	-54.7485	-54.0161	-54.7485	-55.481	-53.9856	-54.8706	-54.5044									51.75	-223.104
51.8	-54.5349	-54.0466	-54.6875	-55.2063	-54.1687	-54.718	-54.4128									51.8	-220.607
51.85	-54.718	-53.9246	-54.5959	-55.1758	-54.1077	-54.657	-54.3518									51.85	-217.666
51.9	-54.7485	-54.0466	-54.3823	-55.4504	-54.1382	-54.9927	-54.5044									51.9	-215.779
51.95	-54.657	-53.772	-54.718	-55.3894	-54.1687	-54.8706	-54.2297									51.95	-213.172
52	-54.5349	-54.1687	-54.657	-55.3284	-53.894	-54.5959	-54.5349									52	-210.286
52.05	-54.8706	-54.1687	-54.5044	-55.0232	-54.2297	-54.9011	-54.3823									52.05	-208.011
52.1	-54.779	-54.0466	-54.3213	-55.1453	-54.1077	-54.9316	-54.4434									52.1	-205.958
52.15	-54.4739	-54.0771	-54.718	-55.3894	-53.9856	-54.657	-54.4739									52.15	-203.461
52.2	-54.6875	-53.8635	-54.6265	-55.3284	-54.1382	-54.9011	-54.5349									52.2	-201.63
52.25	-54.7485	-54.1992	-54.4739	-55.2673	-53.833	-54.9011	-54.5044									52.25	-200.798
52.3	-54.6875	-54.1382	-54.3213	-55.0232	-54.0771	-54.779	-54.3518									52.3	-199.189
52.35	-54.5349	-53.8635	-54.5654	-55.3284	-54.1382	-54.8706	-54.5654									52.35	-197.358
52.4	-54.9316	-54.1382	-54.6265	-55.3894	-53.772	-54.9011	-54.2297									52.4	-196.692
52.45	-54.8096	-53.9856	-54.5044	-55.3894	-54.1992	-54.8096	-54.5044									52.45	-195.471
52.5	-54.657	-54.0161	-54.4128	-55.0537	-54.0466	-54.6265	-54.1687									52.5	-194.251
52.55	-54.718	-54.1687	-54.657	-55.4199	-53.9246	-54.9927	-54.657									52.55	-193.085
52.6	-54.9622	-53.7109	-54.6265	-55.3894	-54.1992	-54.9011	-54.2602									52.6	-192.586
52.65	-54.9011	-54.0771	-54.4128	-55.0842	-54.0161	-54.7485	-54.4739									52.65	-191.476
52.7	-54.5959	-54.1077	-54.3518	-55.4199	-54.0466	-54.8401	-54.3823									52.7	-191.421
52.75	-54.6875	-53.8635	-54.6265	-55.4504	-54.1382	-54.8706	-54.5044									52.75	-190.866
52.8	-54.9316	-54.1382	-54.5959	-55.0842	-53.9856	-54.8706	-54.4739									52.8	-191.199
52.85	-54.8096	-54.0466	-54.5349	-55.3894	-54.0771	-54.6265	-54.2602									52.85	-191.532
52.9	-54.5959	-53.9856	-54.2602	-55.2673	-54.1687	-54.9011	-54.3823									52.9	-191.476
52.95	-54.8096	-54.1992	-54.657	-55.3284	-53.9246	-54.9316	-53.9856									52.95	-192.087
53	-54.8401	-53.9551	-54.718	-55.2673	-54.2602	-54.7485	-54.5349									53	-191.976
53.05	-54.8401	-54.0466	-54.6265	-55.1758	-54.0466	-54.8096	-54.3213									53.05	-192.697
53.1	-54.5044	-54.0466	-54.3213	-55.3894	-53.7415	-54.9927	-54.4434									53.1	-193.307
53.15	-54.8401	-53.9856	-54.4434	-54.9927	-54.1077	-55.0232	-54.4739									53.15	-193.141
53.2	-54.9011	-54.0466	-54.5959	-55.3894	-54.1077	-54.718	-54.1687									53.2	-193.807
53.25	-54.8096	-54.1077	-54.5654	-55.0537	-53.8635	-54.9316	-54.4128									53.25	-193.807
53.3	-54.5959	-53.894	-54.4434	-55.3589	-54.1077	-55.0232	-54.3213									53.3	-193.807
53.35	-54.9011	-54.1687	-54.2908	-55.2063	-54.0466	-54.9927	-54.3518									53.35	-193.474
53.4	-54.8401	-54.0466	-54.5349	-55.5115	-53.772	-54.8401	-54.4434									53.4	-192.919
53.45	-54.9316	-53.833	-54.5349	-55.2368	-54.0771	-54.9927	-54.0771									53.45	-192.531
53.5	-54.5959	-54.1382	-54.5349	-55.3894	-54.0161	-54.9622	-54.4739									53.5	-191.976
53.55	-54.8401	-54.1077	-54.2908	-55.3284	-53.833	-54.9622	-54.3823									53.55	-191.31
53.6	-54.9316	-53.833	-54.4128	-55.4199	-54.1382	-54.8096	-54.3823									53.6	-191.254
53.65	-54.9316	-54.0466	-54.657	-55.481	-53.9856	-55.1147	-54.4128									53.65	-190.7
53.7	-54.7485	-54.1077	-54.5044	-55.2063	-53.7415	-54.9622	-54.2602									53.7	-190.2
53.75	-54.718	-53.8635	-54.4739	-55.2978	-54.0161	-54.8096	-54.4434									53.75	-189.534
53.8	-54.9927	-54.0466	-54.3213	-55.0232	-54.0466	-54.779	-54.4739									53.8	-189.923
53.85	-54.9011	-54.0161	-54.5349	-55.3589	-53.9551	-55.0842	-54.1077									53.85	-189.59
53.9	-54.779	-53.772	-54.6875	-55.1453	-53.9856	-54.9316	-54.4739									53.9	-189.312
53.95	-54.5959	-54.1077	-54.5044	-55.2978	-54.0161	-54.8401	-54.3823									53.95	-188.813
54	-54.8706	-54.1382	-54.4434	-55.3589	-53.9856	-54.8096	-54.1382									54	-188.647
54.05	-54.8401	-53.9246	-54.2908	-55.2063	-53.894	-55.1147	-54.4739									54.05	-187.981
54.1	-54.8096	-54.0161	-54.5654	-55.3589	-54.1077	-55.0232	-54.2908									54.1	-187.981
54.15	-54.657	-54.1687	-54.5349	-55.0232	-53.9856	-54.9622	-54.2908									54.15	-186.871
54.2	-54.6265	-54.1077	-54.5044	-55.3894	-53.833	-54.8706	-54.4434									54.2	-187.093
54.25	-54.8706	-53.9551	-54.4128	-55.2978	-54.0466	-55.1453	-54.3213									54.25	-186.982
54.3	-54.8401	-54.1687	-54.2297	-55.2978	-54.0466	-55.0232	-54.4128									54.3	-186.76
54.35	-54.6875	-54.0466	-54.4434	-55.3589	-53.7415	-55.0232	-54.4128									54.35	-186.094
54.4	-54.4739	-53.9246	-54.5959	-55.1147	-54.0161	-54.8706	-54.1687									54.4	-186.205
54.45	-54.779	-54.2297	-54.4434	-55.481	-54.0466	-55.1453	-54.5349									54.45	-185.262
54.5	-54.9927	-54.0466	-54.4434	-55.2978	-53.8025	-55.1453	-54.4739									54.5	-184.762
54.55	-54.9011	-53.8025	-54.2602	-55.3284	-53.9246	-55.0842	-54.1077									54.55	-183.93
54.6	-54.718	-54.1687	-54.2908	-55.3894	-54.0161	-54.8401	-54.5654									54.6	-183.32
54.65	-54.657	-54.1077	-54.5044	-55.1453	-54.1077	-54.9927	-54.5959									54.65	-182.266
54.7	-54.9622	-53.833	-54.5349	-55.4504	-53.772	-55.1147	-54.1382									54.7	-181.711
54.75	-54.9622	-53.9856	-54.5349	-55.3589	-54.0466	-55.0232	-54.5044									54.75	-181.322
54.8	-54.779	-54.1382	-54.4434	-55.1147	-53.9856	-54.9316	-54.5044									54.8	-180.878
54.85	-54.657	-54.0161	-54.2908	-55.4504	-53.9246	-54.779	-54.1687									54.85	-180.989
54.9	-54.6875	-53.894	-54.5654	-55.2368	-54.0466	-55.1147	-54.4739									54.9	-181.6
54.95	-54.8401	-54.1382	-54.5654	-55.2978	-54.0161	-55.1147	-54.3823									54.95	-182.099
55	-54.8096	-54.1687	-54.4739	-55.2978	-54.0161	-54.9927	-54.1382									55	-182.598
55.05	-54.8096	-53.8635	-54.1382	-55.1147	-53.7109	-54.9622	-54.4739									55.05	-183.375
55.1	-54.5959	-54.1077	-54.5654	-55.4199	-54.0771	-54.9316	-54.4128									55.1	-183.764
55.15	-54.5349	-54.0771	-54.4434	-55.4504	-54.0466	-55.1453	-54.1077									55.15	-184.762
55.2	-54.8096	-53.9856	-54.2908	-55.1147	-53.8025	-55.0537	-54.5044									55.2	-185.595
55.25	-54.8706	-53.9551	-54.4739	-55.4199	-53.833	-55.1453	-54.5044									55.25	-186.372
55.3	-54.779	-54.1382	-54.5654	-55.3589	-54.0161	-54.8401	-54.2602									55.3	-186.76
55.35	-54.7485	-54.0466	-54.2297	-55.1147	-54.0466	-54.9622	-54.5654									55.35	-187.315
55.4	-54.5044	-53.8635	-54.6265	-55.4199	-53.7415	-55.1758	-54.4434									55.4	-187.426
55.45	-54.718	-53.9856	-54.4434	-55.2978	-53.9246	-55.1147	-54.2908									55.45	-187.925
55.5	-54.9011	-54.0771	-54.3518	-55.3284	-53.9856	-55.1147	-54.657									55.5	-188.258
55.55	-54.8096	-53.9246	-54.4739	-55.4504	-54.0161	-54.8706	-54.5044									55.55	-188.314
55.6	-54.7485	-53.7415	-54.2297	-55.2063	-53.6804	-54.9622	-54.3213									55.6	-188.48
55.65	-54.4739	-54.1077	-54.5349	-55.2368	-53.9856	-55.1453	-54.5044									55.65	-187.925
55.7	-54.779	-54.0161	-54.3518	-55.3894	-54.0466	-55.0537	-54.5349									55.7	-187.148
55.75	-54.8096	-53.894	-54.657	-55.2673	-53.9551	-55.1147	-54.3213									55.75	-186.815
55.8	-54.7485	-53.894	-54.4739	-55.3589	-53.7109	-54.8096	-54.3823									55.8	-186.15
55.85	-54.5959	-54.2297	-54.5349	-55.3589	-54.1382	-54.9011	-54.5349									55.85	-185.262
55.9	-54.8401	-54.0466	-54.6265	-55.2063	-54.0466	-55.1758	-54.3213									55.9	-184.707
55.95	-54.718	-53.7415	-54.4128	-55.2978	-53.9246	-55.0842	-54.2908									55.95	-183.875
56	-54.5654	-53.9856	-54.6265	-55.3589	-53.8025	-55.1147	-54.4739									56	-183.653
56.05	-54.779	-54.0466	-54.2602	-55.0842	-54.1077	-54.9316	-54.4739									56.05	-183.209
56.1	-54.5654	-53.9856	-54.5654	-55.2368	-54.0161	-54.9011	-54.1687									56.1	-182.82
56.15	-54.6875	-53.6499	-54.3823	-55.2673	-53.894	-55.0537	-54.4434									56.15	-182.377
56.2	-54.6875	-54.0161	-54.718	-55.0232	-53.833	-55.1453	-54.4434									56.2	-182.044
56.25	-54.4128	-54.0466	-54.5349	-55.3284	-54.0771	-55.1453	-54.2908									56.25	-182.21
56.3	-54.8096	-54.0161	-54.4739	-55.2978	-54.0161	-54.9011	-54.5044									56.3	-182.099
56.35	-54.5349	-53.7109	-54.5959	-55.1453	-53.8635	-55.1758	-54.5044									56.35	-181.655
56.4	-54.7485	-53.9551	-54.2908	-55.3284	-53.7415	-55.1453	-54.3213									56.4	-182.044
56.45	-54.5959	-53.9856	-54.6265	-55.2673	-54.0466	-54.9622	-54.2602									56.45	-182.21
56.5	-54.6265	-53.9551	-54.3823	-55.1147	-53.894	-55.0537	-54.5959									56.5	-182.099
56.55	-54.718	-53.6804	-54.4739	-55.2978	-53.9856	-55.2063	-54.5654									56.55	-182.82
56.6	-54.5349	-53.9246	-54.6265	-55.3284	-53.6804	-55.0842	-54.1687									56.6	-183.431
56.65	-54.779	-53.9856	-54.2602	-55.1147	-53.9551	-54.9927	-54.4128									56.65	-184.097
56.7	-54.3823	-53.9246	-54.657	-55.2368	-54.0161	-55.0842	-54.5044									56.7	-184.929
56.75	-54.7485	-53.6804	-54.5044	-55.3589	-54.0771	-54.8401	-54.4128									56.75	-186.039
56.8	-54.5654	-53.894	-54.5349	-55.2673	-53.772	-55.1758	-54.2908									56.8	-187.759
56.85	-54.8706	-54.0161	-54.5044	-55.1453	-53.8635	-54.9622	-54.5349									56.85	-189.146
56.9	-54.6265	-54.1077	-54.3823	-55.3284	-54.0771	-54.9927	-54.4128									56.9	-190.644
56.95	-54.657	-53.8025	-54.657	-55.2673	-54.0161	-55.1453	-54.1992									56.95	-192.475
57	-54.8096	-53.8025	-54.6875	-54.9927	-53.9246	-54.9011	-54.3823									57	-193.862
57.05	-54.5044	-54.0771	-54.3823	-55.3589	-53.6804	-55.1453	-54.4128									57.05	-196.082
57.1	-54.779	-54.1077	-54.718	-55.2368	-53.9856	-54.779	-54.3518									57.1	-197.247
57.15	-54.4739	-53.9856	-54.5959	-55.0232	-54.0466	-55.1758	-54.1687									57.15	-198.856
57.2	-54.6875	-53.7109	-54.4739	-55.3894	-53.9551	-54.9622	-54.4128									57.2	-200.687
57.25	-54.6875	-53.9856	-54.7485	-55.3284	-53.8025	-55.2063	-54.4128									57.25	-201.963
57.3	-54.5654	-54.1077	-54.5349	-55.1758	-53.8025	-55.0537	-54.2908									57.3	-203.295
57.35	-54.6265	-54.0771	-54.4434	-55.1758	-53.9856	-55.1453	-54.2297									57.35	-204.516
57.4	-54.4128	-53.7415	-54.5959	-55.3894	-53.8635	-55.2063	-54.5044									57.4	-204.849
57.45	-54.8401	-53.833	-54.4434	-55.3284	-53.894	-54.9622	-54.4128									57.45	-205.57
57.5	-54.7485	-54.0771	-54.6265	-55.0537	-53.6804	-55.1147	-54.3213									57.5	-205.181
57.55	-54.4434	-53.9246	-54.5959	-55.3894	-53.8025	-54.8706	-54.2908									57.55	-204.405
57.6	-54.8401	-53.9856	-54.4434	-55.4504	-53.9551	-55.0842	-54.5654									57.6	-204.016
57.65	-54.7485	-53.6194	-54.6875	-55.2063	-53.8635	-54.9011	-54.5349									57.65	-202.574
57.7	-54.718	-53.894	-54.5959	-55.2673	-53.894	-55.1147	-54.3823									57.7	-201.519
57.75	-54.657	-54.0161	-54.4739	-55.4199	-53.5889	-55.0232	-54.3213									57.75	-200.188
57.8	-54.4434	-53.9246	-54.657	-55.3284	-53.8635	-54.9316	-54.5349									57.8	-199.022
57.85	-54.8401	-53.894	-54.6875	-55.1758	-53.9856	-55.1147	-54.5044									57.85	-198.135
57.9	-54.8096	-53.7415	-54.4434	-55.3894	-53.894	-54.779	-54.2602									57.9	-196.359
57.95	-54.4128	-54.0771	-54.6875	-55.2978	-53.9246	-55.0537	-54.2297									57.95	-195.36
58	-54.718	-54.1077	-54.6265	-55.1453	-53.833	-55.0842	-54.4739									58	-194.584
58.05	-54.718	-54.0161	-54.5349	-55.2978	-53.833	-54.8401	-54.4739									58.05	-193.03
58.1	-54.4739	-53.833	-54.718	-55.3589	-53.9551	-55.0842	-54.3213									58.1	-192.364
58.15	-54.8706	-53.833	-54.5959	-55.2673	-53.894	-54.8706	-54.1382									58.15	-191.31
58.2	-54.6265	-54.0771	-54.5044	-55.0232	-53.9551	-55.1758	-54.5654									58.2	-189.812
58.25	-54.5349	-54.0771	-54.6265	-55.3894	-53.8025	-55.1453	-54.4739									58.25	-189.201
58.3	-54.8401	-54.0466	-54.5959	-55.2978	-53.6499	-54.8096	-54.4128									58.3	-188.425
58.35	-54.6875	-53.9856	-54.4739	-55.2063	-53.772	-55.0842	-54.1687									58.35	-187.87
58.4	-54.5959	-53.8025	-54.5044	-55.1147	-53.9246	-55.0842	-54.5349									58.4	-187.703
58.45	-54.779	-53.894	-54.5349	-55.4504	-53.7109	-54.9316	-54.5349									58.45	-187.37
58.5	-54.6875	-54.0161	-54.5044	-55.2978	-53.7109	-54.9927	-54.3823									58.5	-187.703
58.55	-54.657	-53.9551	-54.4739	-55.1453	-53.4363	-54.7485	-54.0771									58.55	-188.092
58.6	-54.779	-53.9246	-54.6265	-55.1453	-53.4668	-54.8401	-54.0466									58.6	-188.757
58.65	-54.6265	-53.772	-54.4739	-55.2063	-53.5583	-54.6265	-54.0771									58.65	-189.312
58.7	-54.5654	-53.8025	-54.2297	-55.1453	-53.2837	-54.1077	-53.4973									58.7	-190.644
58.75	-54.8401	-53.9856	-54.4128	-54.5654	-53.0395	-54.0161	-53.1006									58.75	-191.698
58.8	-54.657	-53.9246	-54.2297	-54.5654	-52.4597	-53.6804	-52.6733									58.8	-193.474
58.85	-54.6265	-53.6499	-53.8025	-54.4434	-52.5513	-53.0395	-52.5207									58.85	-194.916
58.9	-54.8096	-53.772	-54.0466	-54.2297	-52.2156	-53.1006	-52.2156									58.9	-197.247
58.95	-54.718	-53.6194	-53.833	-53.772	-51.7578	-52.6733	-51.6968									58.95	-198.69
59	-54.5654	-53.4668	-53.4363	-53.4973	-51.3916	-52.0325	-51.2695									59	-200.465
59.05	-54.7485	-53.6499	-53.4363	-53.4973	-51.3	-52.1545	-50.9033									59.05	-202.019
59.1	-54.6265	-53.4973	-53.3752	-53.2837	-50.9644	-51.6968	-50.9033									59.1	-203.572
59.15	-54.4739	-53.2227	-53.0701	-52.7954	-50.6287	-51.1475	-50.5981									59.15	-204.349
59.2	-54.7485	-53.4973	-52.8259	-52.7039	-50.4761	-51.2085	-50.354									59.2	-204.904
59.25	-54.718	-53.3447	-52.948	-52.7954	-49.8962	-51.0254	-50.0183									59.25	-205.181
59.3	-54.3823	-53.3142	-52.8564	-52.6123	-50.1709	-50.5676	-49.8352									59.3	-205.459
59.35	-54.779	-53.2532	-52.4902	-52.2461	-49.8352	-50.6592	-49.9573									59.35	-205.348
59.4	-54.657	-53.0395	-52.7649	-52.1545	-49.5911	-50.4456	-49.6216									59.4	-204.627
59.45	-54.3823	-53.2227	-52.6428	-52.3071	-49.4995	-50.0488	-49.6216									59.45	-204.183
59.5	-54.657	-52.8564	-52.4292	-52.2156	-49.1028	-50.2014	-49.3469									59.5	-202.907
59.55	-54.779	-53.1921	-52.3376	-52.0019	-49.3164	-50.0183	-49.1943									59.55	-201.519
59.6	-54.5959	-52.9175	-52.5818	-51.8188	-48.9807	-49.5605	-49.3469									59.6	-200.077
59.65	-54.657	-53.0701	-52.4597	-52.0325	-49.2249	-49.7436	-49.1638									59.65	-198.912
59.7	-54.7485	-52.948	-52.2461	-52.0019	-48.9807	-49.6826	-49.0417									59.7	-196.526
59.75	-54.7485	-53.009	-52.5513	-51.9714	-49.0723	-49.2249	-48.6755									59.75	-194.861
59.8	-54.657	-52.9175	-52.4597	-51.6052	-49.0723	-49.3774	-48.8892									59.8	-193.196
59.85	-54.7485	-53.009	-52.4292	-51.8494	-48.9197	-49.2859	-48.7976									59.85	-191.143
59.9	-54.6875	-53.0701	-52.2766	-51.9409	-49.1333	-49.0112	-48.3398									59.9	-188.647
59.95	-54.3518	-52.9175	-52.6733	-51.7883	-48.8892	-49.1333	-48.5535									59.95	-187.148
60	-54.718	-53.009	-52.5513	-51.7883	-49.0723	-49.1028	-48.3398									60	-185.65
60.05	-54.7485	-52.887	-52.3987	-51.6052	-48.8586	-48.8892	-47.8821									60.05	-183.542
60.1	-54.5349	-53.1616	-52.4597	-51.9409	-49.1333	-49.0112	-48.0957									60.1	-182.044
60.15	-54.5349	-52.948	-52.7039	-51.9714	-49.0723	-49.0723	-47.8821									60.15	-181.1
60.2	-54.6875	-53.1921	-52.6123	-52.124	-49.0723	-48.9807	-47.5769									60.2	-179.824
60.25	-54.657	-53.2227	-52.4292	-51.9104	-49.0723	-48.8586	-47.6074									60.25	-178.548
60.3	-54.3213	-53.009	-52.4597	-51.8799	-48.8892	-49.1333	-47.1191									60.3	-177.383
60.35	-54.6265	-53.0701	-52.6428	-52.2156	-49.2249	-49.0723	-47.3328									60.35	-175.94
60.4	-54.7485	-52.948	-52.6428	-52.1851	-49.0112	-48.584	-46.7834									60.4	-175.441
60.45	-54.5044	-53.3752	-52.4292	-52.1851	-49.0723	-49.0417	-46.9665									60.45	-174.331
60.5	-54.5349	-53.1616	-52.6733	-52.0935	-49.0723	-48.9502	-46.7529									60.5	-173.554
60.55	-54.6875	-52.9785	-52.6733	-52.2766	-48.9197	-48.7366	-46.6919									60.55	-172.666
60.6	-54.6875	-53.1311	-52.7344	-52.4292	-49.3469	-48.8281	-46.4477									60.6	-171.779
60.65	-54.3823	-52.948	-52.4902	-52.3376	-49.3164	-48.7061	-46.2036									60.65	-171.224
60.7	-54.6265	-53.1616	-52.7649	-52.3376	-49.0417	-48.645	-46.2341									60.7	-171.057
60.75	-54.5959	-53.2227	-52.887	-52.2156	-49.3774	-48.5535	-45.8984									60.75	-170.391
60.8	-54.657	-52.9175	-52.9785	-52.6123	-49.1943	-48.8586	-45.8374									60.8	-170.891
60.85	-54.4739	-53.1311	-52.6733	-52.4292	-49.2554	-48.7366	-45.4407									60.85	-170.669
60.9	-54.6875	-53.1311	-52.9785	-52.2156	-49.2859	-48.4924	-45.6238									60.9	-170.724
60.95	-54.5959	-52.9785	-53.009	-52.4292	-49.1333	-48.8586	-45.1965									60.95	-170.835
61	-54.4128	-53.1616	-53.0395	-52.5207	-49.4385	-48.7976	-45.3186									61	-170.724
61.05	-54.4434	-53.009	-52.9175	-52.2461	-49.3774	-48.7671	-44.9524									61.05	-170.558
61.1	-54.6265	-53.1616	-53.0395	-52.4597	-49.1638	-48.7061	-45.1355									61.1	-170.78
61.15	-54.5654	-53.1921	-53.2227	-52.4292	-49.5605	-49.1028	-44.8914									61.15	-170.391
61.2	-54.2908	-52.9175	-53.1311	-52.3071	-49.6216	-49.0112	-44.7998									61.2	-170.447
61.25	-54.4434	-53.3447	-53.0395	-52.4902	-49.3469	-48.9197	-44.6777									61.25	-169.948
61.3	-54.657	-53.3142	-53.009	-52.3376	-49.7742	-49.1638	-44.342									61.3	-170.059
61.35	-54.5349	-53.0395	-53.1921	-52.6733	-49.7742	-49.3469	-44.7388									61.35	-169.393
61.4	-54.2602	-53.3142	-53.1921	-52.6428	-49.53	-49.3164	-44.342									61.4	-168.671
61.45	-54.5044	-53.2532	-53.1616	-52.7039	-49.9878	-49.0723	-44.3726									61.45	-168.172
61.5	-54.5959	-53.0395	-53.0395	-52.7039	-49.8962	-49.5911	-44.2505									61.5	-167.007
61.55	-54.5349	-53.3752	-53.2532	-52.6428	-49.7436	-49.6521	-44.0063									61.55	-166.507
61.6	-54.3518	-53.2227	-53.3447	-52.887	-50.2319	-49.53	-44.1894									61.6	-165.731
61.65	-54.5044	-52.9785	-53.3752	-52.7039	-50.1404	-49.5911	-43.8232									61.65	-164.954
61.7	-54.6265	-53.2837	-53.1311	-52.8564	-49.9878	-49.8657	-43.8232									61.7	-164.066
61.75	-54.5044	-53.1006	-53.1921	-52.7649	-50.293	-49.8962	-43.8538									61.75	-163.234
61.8	-54.4128	-53.1616	-53.4363	-52.9785	-50.354	-49.5605	-43.3655									61.8	-163.511
61.85	-54.4739	-53.2532	-53.3752	-52.7344	-50.1709	-49.8962	-43.4875									61.85	-162.512
61.9	-54.657	-53.1311	-53.3447	-53.1006	-50.5066	-49.9573	-43.2129									61.9	-161.958
61.95	-54.4434	-53.2532	-53.1006	-52.7344	-50.4456	-49.8962	-43.0298									61.95	-161.958
62	-54.3823	-53.3142	-53.3447	-53.1311	-50.2624	-49.7131	-42.9077									62	-161.902
62.05	-54.3518	-53.1616	-53.5278	-53.0395	-50.6287	-49.9573	-42.4194									62.05	-161.181
62.1	-54.5959	-53.1616	-53.4973	-53.1006	-50.5371	-50.0488	-42.4805									62.1	-160.737
62.15	-54.5349	-53.3752	-53.3447	-53.1311	-50.1709	-49.9573	-42.1753									62.15	-160.348
62.2	-54.4128	-53.2837	-53.1921	-53.009	-50.5676	-49.8352	-41.6565									62.2	-160.515
62.25	-54.2602	-53.1921	-53.4973	-53.1921	-50.5676	-50.0183	-41.626									62.25	-159.849
62.3	-54.4739	-53.3447	-53.5889	-52.887	-50.293	-49.9573	-41.1377									62.3	-160.015
62.35	-54.5654	-53.2837	-53.4973	-53.2532	-50.4761	-49.9573	-40.6189									62.35	-159.572
62.4	-54.5349	-53.2227	-53.3447	-53.1006	-50.415	-49.7742	-40.4358									62.4	-158.906
62.45	-54.2908	-53.3752	-53.2227	-53.2837	-50.293	-49.8962	-39.7339									62.45	-158.684
62.5	-54.2908	-53.2837	-53.4058	-53.2837	-50.415	-49.8962	-39.154									62.5	-158.628
62.55	-54.5349	-53.1616	-53.5889	-53.009	-50.3845	-49.8352	-38.6658									62.55	-157.519
62.6	-54.5654	-53.4668	-53.4973	-53.3142	-50.3235	-49.6826	-37.8113									62.6	-157.241
62.65	-54.4739	-53.3142	-53.4973	-53.1311	-50.293	-49.7131	-37.1704									62.65	-157.186
62.7	-54.2908	-53.0701	-53.3142	-53.2532	-50.4456	-49.9268	-36.3464									62.7	-156.575
62.75	-54.4128	-53.4058	-53.4058	-53.1921	-50.415	-49.8352	-35.0952									62.75	-156.02
62.8	-54.4739	-53.3447	-53.6499	-52.948	-50.2014	-49.7742	-34.3018									62.8	-156.076
62.85	-54.5349	-53.1311	-53.5583	-53.2532	-50.6287	-49.6521	-33.1116									62.85	-155.965
62.9	-54.4739	-53.3447	-53.7109	-53.1921	-50.5676	-49.9268	-31.2805									62.9	-155.743
62.95	-54.3213	-53.3142	-53.4668	-53.1006	-50.1709	-49.9573	-30.1819									62.95	-155.41
63	-54.4128	-53.2532	-53.3752	-53.1006	-50.5066	-49.8352	-28.2898									63	-155.521
63.05	-54.5349	-53.2837	-53.6804	-52.9175	-50.6592	-49.7436	-25.9399									63.05	-155.355
63.1	-54.4434	-53.4363	-53.6194	-53.2227	-50.6592	-49.8962	-24.0479									63.1	-155.466
63.15	-54.3823	-53.2837	-53.7415	-53.2532	-50.3845	-50.0793	-21.2402									63.15	-154.911
63.2	-54.2602	-53.2532	-53.5278	-52.9175	-50.7507	-50.0488	-17.9749									63.2	-154.744
63.25	-54.3213	-53.5278	-53.3142	-53.2227	-50.7812	-50.0793	-15.1672									63.25	-154.689
63.3	-54.4434	-53.3752	-53.6804	-53.1311	-50.4761	-49.8047	-11.5967									63.3	-154.578
63.35	-54.4434	-53.1921	-53.6804	-53.1311	-50.8118	-50.0793	-7.53784									63.35	-153.856
63.4	-54.3518	-53.4973	-53.5278	-53.2532	-50.8423	-50.2319	-3.8147									63.4	-153.912
63.45	-54.2908	-53.5278	-53.3752	-53.009	-50.7202	-50.293	0.152588									63.45	-153.635
63.5	-54.2908	-53.3447	-53.6804	-53.3447	-50.6897	-50.1099	4.48608									63.5	-152.913
63.55	-54.5959	-53.2837	-53.5889	-53.4058	-50.9949	-49.9878	8.27026									63.55	-152.858
63.6	-54.4739	-53.5583	-53.3752	-53.1311	-50.9033	-50.293	12.2986									63.6	-153.635
63.65	-54.5044	-53.5278	-53.6804	-53.4973	-50.8118	-50.3235	16.2659									63.65	-152.747
63.7	-54.3518	-53.1921	-53.4668	-53.5278	-50.9644	-50.3235	19.2566									63.7	-152.858
63.75	-54.1992	-53.5278	-53.6194	-53.2532	-51.1169	-50.1099	22.3694									63.75	-152.969
63.8	-54.5044	-53.4058	-53.6499	-53.5278	-50.9949	-50.0183	25.2075									63.8	-153.413
63.85	-54.5349	-53.3447	-53.4668	-53.4363	-50.8118	-50.3845	27.1606									63.85	-153.246
63.9	-54.5044	-53.3447	-53.7415	-53.3142	-51.0864	-50.354	28.7476									63.9	-153.191
63.95	-54.3823	-53.5583	-53.6499	-53.6194	-51.1475	-50.4456	30.1208									63.95	-153.468
64	-54.3823	-53.4363	-53.833	-53.4363	-50.9949	-50.1709	30.7617									64	-153.524
64.05	-54.5044	-53.3142	-53.5889	-53.3142	-50.8728	-50.1099	30.7007									64.05	-153.357
64.1	-54.4739	-53.4973	-53.5889	-53.5278	-51.2085	-50.415	30.4565									64.1	-153.302
64.15	-54.2908	-53.5583	-53.833	-53.4363	-51.178	-50.3845	29.6631									64.15	-153.579
64.2	-54.4434	-53.5583	-53.5278	-53.4058	-50.9949	-50.3845	28.0457									64.2	-153.69
64.25	-54.5349	-53.3752	-53.7415	-53.4973	-50.8728	-50.293	26.3367									64.25	-154.245
64.3	-54.2602	-53.7415	-53.4363	-53.3752	-51.0864	-50.2014	24.3225									64.3	-154.467
64.35	-54.3823	-53.6499	-53.772	-53.3142	-51.0864	-50.354	21.4844									64.35	-154.467
64.4	-54.4739	-53.5889	-53.5889	-53.5278	-50.9338	-50.4456	18.6768									64.4	-154.134
64.45	-54.1687	-53.4973	-53.8025	-53.3447	-50.8728	-50.3845	15.5945									64.45	-154.134
64.5	-54.4739	-53.7415	-53.6804	-53.2837	-51.0559	-50.354	12.207									64.5	-154.189
64.55	-54.2908	-53.5278	-53.5583	-53.5278	-50.9949	-50.2319	8.57544									64.55	-153.856
64.6	-54.4434	-53.5583	-53.6499	-53.2837	-50.9033	-50.3235	5.18799									64.6	-154.134
64.65	-54.5044	-53.4058	-53.4973	-53.3142	-50.8118	-50.4761	1.89209									64.65	-153.69
64.7	-54.1077	-53.6499	-53.7415	-53.4668	-51.1475	-50.415	-1.95312									64.7	-154.023
64.75	-54.5349	-53.6194	-53.5889	-53.3142	-51.1169	-50.2014	-5.46265									64.75	-153.856
64.8	-54.2602	-53.5278	-53.8025	-53.2837	-50.9949	-50.5676	-8.75854									64.8	-153.635
64.85	-54.5959	-53.4058	-53.8025	-53.4363	-50.8423	-50.4456	-12.146									64.85	-154.3
64.9	-54.2908	-53.772	-53.5583	-53.2227	-51.1169	-50.2014	-15.7166									64.9	-154.633
64.95	-54.5044	-53.6499	-53.772	-53.2227	-51.2085	-50.5981	-18.8293									64.95	-154.633
65	-54.4434	-53.4973	-53.6804	-53.4973	-51.1475	-50.5371	-21.7285									65	-155.077
65.05	-54.3823	-53.3447	-53.772	-53.3142	-50.9338	-50.4456	-25.0549									65.05	-155.577
65.1	-54.4739	-53.833	-53.7415	-53.1006	-51.178	-50.5676	-27.9541									65.1	-155.798
65.15	-54.1992	-53.6499	-53.3447	-53.4973	-51.3611	-50.3845	-30.7007									65.15	-155.688
65.2	-54.4434	-53.6194	-53.833	-53.3752	-51.3	-50.7202	-33.3862									65.2	-156.076
65.25	-54.1077	-53.4363	-53.7415	-53.2532	-51.1475	-50.5371	-36.1328									65.25	-155.909
65.3	-54.5349	-53.8025	-53.5278	-53.4363	-51.1169	-50.7507	-38.6352									65.3	-156.076
65.35	-54.3213	-53.833	-53.7415	-53.4973	-51.3916	-50.8118	-40.863									65.35	-156.242
65.4	-54.4434	-53.6499	-53.6804	-53.2532	-51.3306	-50.6897	-43.3655									65.4	-156.242
65.45	-54.3823	-53.4668	-53.6499	-53.4363	-51.3306	-50.8728	-45.7153									65.45	-156.187
65.5	-54.2602	-53.6194	-53.7415	-53.4668	-50.9644	-50.5981	-47.821									65.5	-156.353
65.55	-54.4434	-53.8025	-53.4363	-53.3752	-51.3611	-50.9644	-49.7131									65.55	-156.631
65.6	-54.1077	-53.6499	-53.772	-53.3752	-51.3916	-50.6897	-51.9409									65.6	-157.075
65.65	-54.6265	-53.5278	-53.833	-53.6194	-51.3916	-50.9338	-53.894									65.65	-156.575
65.7	-54.4739	-53.4668	-53.5278	-53.5278	-51.2085	-50.7812	-55.6946									65.7	-157.019
65.75	-54.2908	-53.6804	-53.8635	-53.1616	-51.0864	-51.0254	-57.1289									65.75	-157.075
65.8	-54.5044	-53.6499	-53.7415	-53.6804	-51.3916	-50.9338	-59.1125									65.8	-157.075
65.85	-54.3823	-53.6499	-53.5278	-53.5889	-51.4832	-50.9949	-60.5469									65.85	-156.797
65.9	-54.5654	-53.3752	-53.8635	-53.3752	-51.4526	-50.9949	-62.0117									65.9	-156.742
65.95	-54.4739	-53.5583	-53.833	-53.4668	-51.2695	-50.8118	-63.2935									65.95	-156.353
66	-54.1687	-53.6499	-53.5889	-53.5889	-51.2695	-51.0559	-64.8193									66	-156.409
66.05	-54.5959	-53.6194	-54.0161	-53.5889	-51.4832	-50.8423	-66.1621									66.05	-155.743
66.1	-54.4128	-53.5583	-53.9551	-53.3447	-51.4526	-51.1169	-67.2302									66.1	-156.02
66.15	-54.2602	-53.4058	-53.4973	-53.4973	-51.4221	-51.0254	-68.0542									66.15	-155.688
66.2	-54.3518	-53.6804	-54.0161	-53.5583	-51.3611	-51.1169	-69.4275									66.2	-155.577
66.25	-54.1992	-53.6804	-53.9246	-53.3447	-51.3	-51.239	-70.343									66.25	-155.577
66.3	-54.2602	-53.6804	-53.6804	-53.4363	-51.4526	-50.8728	-71.1059									66.3	-155.577
66.35	-54.3213	-53.6194	-53.9551	-53.5583	-51.4832	-51.3	-71.8079									66.35	-155.521
66.4	-54.0771	-53.5583	-53.8635	-53.4363	-51.5137	-51.2085	-72.7844									66.4	-155.355
66.45	-54.3518	-53.5889	-53.5889	-53.2837	-51.3916	-51.2695	-73.6389									66.45	-155.466
66.5	-54.3213	-53.7109	-53.9856	-53.5278	-51.3	-51.2695	-74.2187									66.5	-155.244
66.55	-54.0161	-53.6194	-53.9246	-53.5583	-51.4526	-51.1169	-74.6765									66.55	-154.911
66.6	-54.4128	-53.6194	-53.5583	-53.4668	-51.5747	-51.3306	-75.3174									66.6	-154.966
66.65	-54.2908	-53.3447	-53.8635	-53.3752	-51.5137	-51.4221	-75.9888									66.65	-154.966
66.7	-54.1077	-53.5278	-53.9246	-53.6499	-51.4832	-51.0254	-76.416									66.7	-153.912
66.75	-54.3518	-53.7109	-53.7109	-53.4973	-51.3611	-51.3916	-76.7822									66.75	-153.745
66.8	-54.2908	-53.5889	-53.9551	-53.4668	-51.4221	-51.3	-77.0264									66.8	-153.357
66.85	-54.1382	-53.6194	-53.8635	-53.4363	-51.6968	-51.1475	-77.6062									66.85	-153.357
66.9	-54.3823	-53.3447	-53.833	-53.772	-51.6663	-51.3916	-78.064									66.9	-153.246
66.95	-54.3213	-53.5583	-53.8635	-53.5889	-51.6663	-51.178	-78.2776									66.95	-153.302
67	-54.0771	-53.7415	-53.9246	-53.4973	-51.5137	-51.3306	-78.3997									67	-153.08
67.05	-54.3213	-53.6804	-53.772	-53.5583	-51.5747	-51.239	-78.6133									67.05	-152.858
67.1	-54.3213	-53.4668	-53.7109	-53.7109	-51.8494	-50.9949	-79.1016									67.1	-152.802
67.15	-54.0771	-53.4973	-54.0161	-53.6499	-51.7273	-51.2695	-79.2236									67.15	-152.636
67.2	-54.4128	-53.8025	-53.8635	-53.4363	-51.5442	-51.2695	-79.4372									67.2	-152.247
67.25	-54.1687	-53.6804	-53.6194	-53.5278	-51.5747	-50.9644	-79.3762									67.25	-152.691
67.3	-54.0161	-53.3752	-53.9246	-53.7109	-51.7273	-51.3306	-79.6509									67.3	-152.081
67.35	-54.2602	-53.7415	-53.833	-53.6804	-51.6052	-51.3	-79.956									67.35	-152.247
67.4	-54.2602	-53.6804	-53.6499	-53.4363	-51.4526	-50.9338	-80.0476									67.4	-151.914
67.45	-53.9856	-53.4668	-53.833	-53.5278	-51.6663	-51.3916	-80.1697									67.45	-151.637
67.5	-54.2602	-53.5889	-53.8635	-53.772	-51.4832	-51.3306	-80.1086									67.5	-151.249
67.55	-54.1992	-53.4668	-53.772	-53.6194	-51.7273	-50.9338	-80.2002									67.55	-151.082
67.6	-53.9246	-53.6499	-53.7415	-53.5583	-51.6357	-51.3611	-80.5969									67.6	-150.361
67.65	-54.2908	-53.7415	-53.894	-53.4668	-51.3611	-51.2695	-80.5969									67.65	-150.083
67.7	-54.2297	-53.4668	-53.833	-53.772	-51.7273	-51.1169	-80.6274									67.7	-150.083
67.75	-54.0771	-53.5889	-53.6194	-53.7415	-51.5442	-51.3611	-80.3223									67.75	-149.695
67.8	-54.2908	-53.2837	-53.9246	-53.5278	-51.6663	-51.2695	-80.5664									67.8	-149.418
67.85	-54.2297	-53.6804	-53.9246	-53.4668	-51.5747	-51.0559	-80.9021									67.85	-149.473
67.9	-54.0771	-53.4058	-53.8025	-53.8025	-51.6663	-51.4526	-80.8411									67.9	-149.917
67.95	-54.1992	-53.6804	-53.7415	-53.772	-51.7578	-51.3611	-80.8716									67.95	-150.139
68	-54.3213	-53.4668	-53.9856	-53.6194	-51.4832	-51.1169	-80.6885									68	-150.083
68.05	-54.1382	-53.6804	-53.8635	-53.4668	-51.8188	-51.4526	-80.8716									68.05	-149.972
68.1	-53.9551	-53.5889	-53.6804	-53.5889	-51.5442	-51.3611	-80.9936									68.1	-150.25
68.15	-54.3518	-53.4668	-53.894	-53.7415	-51.9714	-51.0559	-80.9326									68.15	-150.028
68.2	-54.2297	-53.5583	-54.0466	-53.7109	-51.5747	-51.5442	-80.6274									68.2	-149.529
68.25	-53.894	-53.4668	-53.894	-53.5278	-51.8188	-51.5137	-81.0242									68.25	-149.418
68.3	-54.1992	-53.7109	-53.6499	-53.2837	-51.7578	-51.239	-81.0242									68.3	-148.807
68.35	-54.0771	-53.3142	-53.9856	-53.8025	-51.7578	-51.5137	-80.719									68.35	-147.753
68.4	-53.8635	-53.7109	-53.8635	-53.7109	-51.7578	-51.4832	-81.0242									68.4	-147.919
68.45	-54.1687	-53.4668	-53.8635	-53.7109	-51.5137	-51.3916	-80.8716									68.45	-147.309
68.5	-54.1077	-53.6804	-53.6194	-53.5583	-51.8494	-51.6052	-80.9021									68.5	-147.032
68.55	-53.9856	-53.5583	-53.9551	-53.5889	-51.5747	-51.6052	-80.9936									68.55	-146.976
68.6	-53.9551	-53.3752	-53.9246	-53.7109	-51.8494	-51.3916	-80.6885									68.6	-146.588
68.65	-54.1687	-53.5583	-53.8025	-53.7109	-51.7578	-51.5137	-80.9936									68.65	-146.421
68.7	-54.1077	-53.3447	-53.772	-53.833	-51.6052	-51.6357	-80.8411									68.7	-146.366
68.75	-53.833	-53.6194	-53.9551	-53.5583	-51.8188	-51.6052	-80.9021									68.75	-145.866
68.8	-54.1992	-53.5583	-53.9246	-53.6499	-51.6052	-51.3306	-80.8105									68.8	-145.7
68.85	-54.1687	-53.3142	-53.772	-53.8635	-51.8494	-51.6357	-80.5664									68.85	-145.644
68.9	-54.0466	-53.5583	-53.8025	-53.8025	-51.7883	-51.5747	-80.8105									68.9	-144.757
68.95	-53.8635	-53.4668	-53.9551	-53.6804	-51.6052	-51.2695	-80.3833									68.95	-145.034
69	-54.2297	-53.6194	-53.9551	-53.4668	-51.8494	-51.6357	-80.5969									69	-144.479
69.05	-54.2297	-53.5278	-53.7109	-53.7109	-51.7273	-51.5137	-80.2307									69.05	-144.313
69.1	-53.9246	-53.3447	-53.7415	-53.6194	-51.7273	-51.3611	-80.5664									69.1	-143.702
69.15	-54.0161	-53.6194	-53.8635	-53.6194	-51.8494	-51.3611	-80.2612									69.15	-143.148
69.2	-54.1992	-53.4668	-53.9246	-53.4363	-51.6968	-51.6052	-80.5054									69.2	-142.537
69.25	-54.1992	-53.4973	-53.8635	-53.7109	-51.8494	-51.4832	-80.2917									69.25	-142.149
69.3	-53.8635	-53.7109	-53.7109	-53.5889	-51.7883	-51.2695	-80.2612									69.3	-141.427
69.35	-54.0771	-53.5583	-53.9246	-53.4668	-51.5137	-51.6663	-80.3223									69.35	-141.649
69.4	-54.0771	-53.5278	-53.894	-53.7109	-51.9104	-51.6357	-80.0171									69.4	-141.206
69.45	-54.1077	-53.6194	-53.8025	-53.4668	-51.8188	-51.4526	-80.2307									69.45	-141.206
69.5	-53.8635	-53.3752	-53.6194	-53.6194	-51.5747	-51.5137	-79.895									69.5	-140.762
69.55	-54.1382	-53.6804	-53.8635	-53.5889	-51.8494	-51.6968	-80.2002									69.55	-141.538
69.6	-54.0771	-53.6194	-53.8635	-53.4058	-51.7578	-51.6663	-79.9866									69.6	-141.372
69.65	-54.1382	-53.3142	-53.772	-53.7109	-51.6052	-51.3611	-79.9866									69.65	-141.483
69.7	-53.894	-53.7415	-53.5583	-53.3142	-51.8799	-51.6663	-79.9866									69.7	-141.261
69.75	-54.1992	-53.6194	-53.772	-53.7109	-51.6663	-51.6968	-79.7424									69.75	-142.038
69.8	-54.1687	-53.4363	-53.833	-53.6194	-51.6663	-51.5747	-80.0781									69.8	-141.705
69.85	-54.1382	-53.6499	-53.894	-53.6804	-51.8494	-51.5442	-79.7729									69.85	-141.982
69.9	-53.9856	-53.4668	-53.6804	-53.6804	-51.7578	-51.7273	-79.7424									69.9	-141.095
69.95	-54.2297	-53.3447	-53.6499	-53.4973	-51.7273	-51.7273	-79.8645									69.95	-142.038
70	-54.1687	-53.6804	-53.894	-53.772	-52.0325	-51.5137	-79.5593									70	-141.427
70.05	-54.1992	-53.5278	-53.9551	-53.4668	-51.8188	-51.7273	-79.9255									70.05	-141.594
70.1	-54.0771	-53.3752	-53.833	-53.7109	-51.7883	-51.7578	-79.6814									70.1	-141.483
70.15	-54.2602	-53.6804	-53.6804	-53.3752	-51.8799	-51.8188	-79.4372									70.15	-141.705
70.2	-54.1382	-53.5278	-53.772	-53.6804	-51.7883	-51.5747	-79.6814									70.2	-141.483
70.25	-54.1687	-53.4058	-53.9856	-53.2837	-51.8494	-51.8188	-79.5288									70.25	-142.149
70.3	-53.894	-53.6499	-53.894	-53.772	-51.9104	-51.8799	-79.4983									70.3	-141.927
70.35	-54.1687	-53.6499	-53.8025	-53.4363	-51.8188	-51.8494	-79.4678									70.35	-141.427
70.4	-54.2297	-53.4668	-53.5278	-53.7109	-51.7578	-51.6663	-79.2236									70.4	-141.816
70.45	-54.1382	-53.6499	-53.8025	-53.6194	-51.9714	-51.9714	-79.4678									70.45	-141.982
70.5	-53.9856	-53.6194	-53.894	-53.6804	-51.8799	-51.9409	-79.3762									70.5	-141.76
70.55	-54.0466	-53.4058	-53.833	-53.7109	-51.6968	-51.9104	-79.01									70.55	-141.705
70.6	-54.1992	-53.7415	-53.6499	-53.5278	-51.9409	-51.6052	-79.4372									70.6	-141.76
70.65	-54.1687	-53.6499	-53.4668	-53.8635	-51.8799	-52.0325	-79.2236									70.65	-141.427
70.7	-54.0466	-53.3142	-53.7109	-53.5278	-51.6052	-51.9104	-78.949									70.7	-141.705
70.75	-53.9856	-53.6499	-53.833	-53.772	-51.9104	-51.8188	-79.1321									70.75	-141.705
70.8	-54.1992	-53.6804	-53.8025	-53.6804	-51.8494	-51.6663	-79.0405									70.8	-141.483
70.85	-54.1687	-53.4058	-53.6804	-53.6499	-51.5442	-51.9104	-78.949									70.85	-141.261
70.9	-54.1382	-53.6499	-53.6194	-53.772	-51.8799	-51.9714	-78.949									70.9	-141.039
70.95	-53.9551	-53.6194	-53.6804	-53.3752	-51.8799	-51.8188	-78.7659									70.95	-140.318
71	-54.0466	-53.3142	-53.9246	-53.772	-51.5747	-51.6357	-78.7048									71	-140.817
71.05	-54.1992	-53.5889	-53.8025	-53.7109	-51.8799	-51.7273	-78.7964									71.05	-140.595
71.1	-54.1992	-53.6499	-53.8635	-53.5583	-51.9409	-51.9104	-78.6133									71.1	-140.207
71.15	-54.0466	-53.4668	-53.7109	-53.6804	-51.7883	-51.8188	-78.5522									71.15	-140.207
71.2	-53.8635	-53.6194	-53.5278	-53.4668	-51.6968	-51.6663	-78.6133									71.2	-140.429
71.25	-54.1077	-53.6194	-53.833	-53.772	-51.9714	-51.6663	-78.3997									71.25	-140.207
71.3	-54.1687	-53.4973	-53.9246	-53.6804	-51.9104	-51.9104	-78.4607									71.3	-140.207
71.35	-54.1992	-53.4058	-53.894	-53.4668	-51.5442	-51.9104	-78.4607									71.35	-139.208
71.4	-53.9856	-53.7109	-53.772	-53.7109	-51.9714	-51.7883	-78.3081									71.4	-139.319
71.45	-53.8635	-53.6804	-53.5278	-53.5889	-51.8799	-51.7578	-78.3997									71.45	-139.374
71.5	-54.1077	-53.3142	-53.772	-53.6194	-51.6968	-51.9714	-78.3691									71.5	-139.541
71.55	-54.2297	-53.6194	-53.9551	-53.7415	-51.9104	-51.9714	-78.3386									71.55	-139.374
71.6	-54.1992	-53.6194	-53.8635	-53.4668	-51.9104	-51.9104	-78.2776									71.6	-139.43
71.65	-53.9551	-53.5278	-53.7109	-53.7415	-51.8799	-51.8494	-78.4302									71.65	-139.596
71.7	-53.8635	-53.4973	-53.6804	-53.833	-51.7578	-51.8188	-78.2776									71.7	-139.707
71.75	-54.1382	-53.6194	-53.9246	-53.4973	-52.0935	-52.0935	-78.2165									71.75	-139.153
71.8	-54.2297	-53.5889	-53.894	-53.833	-52.063	-51.9714	-78.3691									71.8	-139.264
71.85	-54.1382	-53.3142	-53.6194	-53.7109	-51.7883	-52.0325	-78.2776									71.85	-138.931
71.9	-54.0161	-53.6804	-53.8635	-53.5278	-52.124	-51.9104	-78.1555									71.9	-138.986
71.95	-53.9246	-53.5889	-53.9246	-53.9246	-52.124	-51.9409	-78.2776									71.95	-138.931
72	-54.1077	-53.4058	-53.6804	-53.6499	-52.0935	-52.1545	-78.186									72	-138.709
72.05	-54.1687	-53.4973	-54.0161	-53.5889	-51.8799	-52.124	-77.9419									72.05	-138.986
72.1	-54.0771	-53.6499	-53.8635	-53.833	-52.2461	-52.124	-78.186									72.1	-139.153
72.15	-54.1992	-53.5278	-53.9551	-53.6804	-52.2156	-51.9104	-78.1555									72.15	-139.097
72.2	-53.894	-53.2837	-54.0161	-53.7415	-52.063	-52.0019	-77.6672									72.2	-139.596
72.25	-54.0161	-53.6194	-53.6499	-53.7109	-52.0935	-52.2156	-78.0334									72.25	-139.818
72.3	-54.1077	-53.5889	-53.9551	-53.4668	-52.2461	-52.3071	-78.0029									72.3	-140.484
72.35	-54.1992	-53.4973	-53.6499	-53.8635	-52.3682	-52.2461	-77.5452									72.35	-140.54
72.4	-53.9856	-53.3142	-54.0161	-53.8635	-52.0325	-51.9714	-77.7588									72.4	-141.206
72.45	-53.9856	-53.6499	-53.8025	-53.5583	-52.124	-52.063	-77.7283									72.45	-141.261
72.5	-54.1077	-53.6804	-53.9246	-53.8025	-52.3071	-52.3071	-77.7283									72.5	-141.76
72.55	-54.0161	-53.4058	-53.9551	-53.894	-52.2766	-52.3376	-77.4841									72.55	-141.427
72.6	-53.8025	-53.4363	-53.8025	-53.6194	-51.9714	-52.1545	-77.7588									72.6	-140.928
72.65	-54.1382	-53.5583	-53.9856	-53.9551	-52.1545	-52.0325	-77.6367									72.65	-141.095
72.7	-54.0466	-53.5278	-53.6499	-53.833	-52.3376	-51.9714	-77.3621									72.7	-140.651
72.75	-53.894	-53.3142	-53.9246	-53.5889	-52.2156	-52.2461	-77.6672									72.75	-140.484
72.8	-54.1687	-53.4058	-53.6804	-53.8635	-52.0019	-52.2461	-77.5452									72.8	-140.429
72.85	-53.894	-53.5278	-53.9856	-53.833	-52.1851	-52.1851	-77.3315									72.85	-140.651
72.9	-54.0771	-53.4363	-53.8635	-53.5278	-52.3376	-52.0019	-77.3926									72.9	-140.318
72.95	-54.0161	-53.2837	-53.9551	-53.9246	-52.3071	-51.9714	-77.4841									72.95	-140.651
73	-53.9551	-53.4973	-54.0771	-53.9551	-52.0019	-52.2156	-77.3315									73	-140.928
73.05	-54.1382	-53.4058	-53.833	-53.5889	-52.2766	-52.0935	-77.0264									73.05	-141.206
73.1	-53.772	-53.4973	-53.9551	-53.8025	-52.3987	-51.9104	-77.3315									73.1	-141.206
73.15	-54.1687	-53.2227	-53.7415	-53.7415	-52.3376	-52.1545	-77.301									73.15	-141.15
73.2	-53.7109	-53.4363	-54.1077	-53.6804	-52.1851	-52.2156	-77.1484									73.2	-141.76
73.25	-54.1687	-53.4973	-54.0771	-53.772	-52.2156	-51.8799	-77.1179									73.25	-141.927
73.3	-53.9246	-53.5889	-53.8635	-53.772	-52.4902	-52.2766	-77.1789									73.3	-141.649
73.35	-54.0771	-53.3142	-53.9856	-53.6194	-52.4597	-52.3071	-77.1484									73.35	-142.204
73.4	-53.894	-53.4363	-53.9551	-53.6804	-52.2461	-52.0935	-76.9348									73.4	-143.092
73.45	-53.8635	-53.5278	-54.0161	-53.894	-52.2156	-52.3987	-77.1179									73.45	-143.092
73.5	-53.9551	-53.4973	-54.0466	-53.7415	-52.4902	-52.1545	-77.0874									73.5	-143.203
73.55	-53.8025	-53.4668	-53.7415	-53.5583	-52.4292	-52.4597	-77.1179									73.55	-142.648
73.6	-53.9551	-53.3447	-54.0771	-53.9551	-52.3376	-52.4292	-76.8433									73.6	-142.426
73.65	-53.8025	-53.5583	-53.9856	-53.833	-52.2156	-52.3071	-77.0874									73.65	-142.149
73.7	-54.0161	-53.4668	-53.8635	-53.6194	-52.3987	-52.4597	-77.0264									73.7	-141.705
73.75	-53.9246	-53.4668	-54.0161	-53.9246	-52.5513	-52.2156	-76.9653									73.75	-141.927
73.8	-53.894	-53.1921	-53.833	-53.894	-52.4292	-52.5513	-76.9043									73.8	-142.093
73.85	-54.0466	-53.4973	-53.9246	-53.7415	-52.2156	-52.1851	-76.9958									73.85	-141.871
73.9	-53.8025	-53.4973	-53.9856	-53.833	-52.3987	-52.6123	-76.9653									73.9	-141.927
73.95	-53.9856	-53.3752	-53.8025	-53.894	-52.5207	-52.3071	-76.8127									73.95	-141.871
74	-53.8635	-53.2227	-53.9856	-53.8635	-52.5818	-52.6123	-76.7822									74	-142.371
74.05	-54.0466	-53.2532	-54.0771	-53.833	-52.4902	-52.4902	-76.8738									74.05	-142.537
74.1	-54.0466	-53.4668	-53.8025	-53.9246	-52.2461	-52.5818	-76.8738									74.1	-142.704
74.15	-53.7415	-53.4668	-54.0161	-53.8635	-52.5207	-52.5513	-76.6296									74.15	-143.092
74.2	-54.0161	-53.3447	-54.0466	-53.6804	-52.7344	-52.4902	-76.6296									74.2	-143.203
74.25	-53.894	-53.2227	-53.833	-53.9551	-52.7344	-52.6123	-76.7822									74.25	-143.48
74.3	-53.833	-53.4058	-54.1382	-53.9246	-52.4902	-52.4292	-76.7212									74.3	-143.48
74.35	-54.0161	-53.5583	-53.9856	-53.772	-52.3987	-52.6428	-76.477									74.35	-142.981
74.4	-53.7109	-53.5583	-53.6194	-53.7109	-52.6428	-52.5513	-76.477									74.4	-142.537
74.45	-53.9551	-53.3447	-54.1077	-54.0161	-52.7954	-52.7649	-76.5991									74.45	-141.927
74.5	-53.894	-53.1921	-54.0161	-53.9246	-52.6733	-52.7039	-76.5991									74.5	-141.372
74.55	-53.7109	-53.5278	-53.7109	-53.7109	-52.4597	-52.4902	-76.3855									74.55	-140.762
74.6	-54.0466	-53.6194	-54.0771	-53.9246	-52.3987	-52.7954	-76.355									74.6	-140.429
74.65	-53.9551	-53.4973	-53.9856	-54.0161	-52.6123	-52.5513	-76.5076									74.65	-139.874
74.7	-53.7109	-53.3752	-53.7109	-53.894	-52.7344	-52.7649	-76.4465									74.7	-139.541
74.75	-54.0771	-53.2837	-54.0466	-53.8025	-52.6123	-52.7649	-76.3855									74.75	-139.097
74.8	-53.894	-53.4668	-54.0466	-54.0771	-52.5513	-52.6123	-76.1719									74.8	-138.376
74.85	-53.772	-53.5583	-53.6499	-54.0466	-52.4292	-52.887	-76.416									74.85	-137.987
74.9	-54.0771	-53.5889	-54.0466	-53.9551	-52.6733	-52.7039	-76.416									74.9	-137.987
74.95	-53.9246	-53.4363	-53.9856	-53.8635	-52.7649	-52.7344	-76.355									74.95	-137.765
75	-53.8025	-53.3142	-53.8025	-53.9856	-52.7039	-52.7954	-76.2024									75	-137.321
75.05	-53.9551	-53.4973	-53.9856	-54.0161	-52.7649	-52.5513	-76.2024									75.05	-137.211
75.1	-53.8025	-53.6194	-54.1382	-53.8025	-52.5513	-52.948	-76.3245									75.1	-136.878
75.15	-53.9246	-53.4973	-53.9551	-53.9856	-52.5818	-52.8259	-76.2329									75.15	-136.933
75.2	-53.894	-53.5583	-53.9856	-54.0161	-52.8564	-52.6428	-76.1108									75.2	-135.768
75.25	-53.772	-53.2837	-54.0771	-53.9856	-52.887	-52.9785	-75.8972									75.25	-135.657
75.3	-53.8635	-53.4668	-54.0466	-53.772	-52.9175	-52.7954	-76.2329									75.3	-135.213
75.35	-53.9246	-53.6194	-53.9551	-54.0771	-52.5513	-52.8564	-76.2024									75.35	-134.381
75.4	-53.7109	-53.6804	-54.1077	-54.0466	-52.6428	-52.948	-76.2024									75.4	-133.992
75.45	-53.772	-53.4668	-54.0466	-53.894	-52.948	-53.0395	-76.0498									75.45	-134.381
75.5	-53.894	-53.4058	-53.833	-53.7109	-52.9175	-52.948	-75.8972									75.5	-134.103
75.55	-53.772	-53.6804	-54.0771	-54.0161	-52.6428	-53.009	-76.0803									75.55	-134.048
75.6	-53.772	-53.5889	-54.0466	-54.0161	-52.8564	-52.9175	-76.0193									75.6	-134.325
75.65	-53.894	-53.4973	-53.7415	-53.9856	-52.9175	-53.0701	-76.1108									75.65	-134.88
75.7	-53.772	-53.6194	-54.0466	-53.8025	-52.6123	-53.1616	-75.8057									75.7	-134.769
75.75	-53.8025	-53.5889	-54.0161	-54.1077	-52.8564	-52.8564	-75.7751									75.75	-134.769
75.8	-53.894	-53.4973	-53.9551	-54.0771	-52.8259	-53.1006	-76.0193									75.8	-135.324
75.85	-53.8635	-53.6194	-53.894	-54.0771	-52.5513	-53.0701	-75.9582									75.85	-135.047
75.9	-53.7109	-53.3447	-54.1077	-53.833	-53.0395	-52.887	-75.9582									75.9	-134.769
75.95	-53.9856	-53.6194	-54.1077	-54.1382	-52.948	-53.2227	-75.6531									75.95	-134.714
76	-53.9856	-53.4668	-53.772	-54.1077	-52.7039	-53.0701	-75.6531									76	-134.769
76.05	-53.6499	-53.5583	-54.1077	-54.1077	-52.948	-52.7649	-75.8972									76.05	-134.492
76.1	-53.9551	-53.6804	-54.0466	-53.9246	-52.6733	-53.1921	-75.7446									76.1	-134.103
76.15	-53.8635	-53.4668	-54.0161	-53.9856	-53.0395	-53.1006	-75.7141									76.15	-133.992
76.2	-53.6804	-53.5889	-54.0466	-54.0771	-52.8259	-52.8259	-75.5005									76.2	-134.436
76.25	-54.0161	-53.3752	-54.1687	-54.0466	-53.009	-53.1006	-75.4089									76.25	-134.214
76.3	-53.8635	-53.6194	-54.1382	-53.9551	-52.948	-53.1006	-75.592									76.3	-133.77
76.35	-53.6804	-53.3752	-53.833	-53.833	-52.9175	-52.887	-75.531									76.35	-133.77
76.4	-53.833	-53.7415	-54.2297	-54.0771	-53.009	-53.1616	-75.4394									76.4	-133.604
76.45	-53.894	-53.4973	-54.0771	-54.0466	-52.7039	-53.1616	-75.1648									76.45	-133.659
76.5	-53.772	-53.7109	-53.9551	-54.0466	-53.009	-53.009	-75.5615									76.5	-133.826
76.55	-53.6194	-53.4973	-53.9856	-53.9246	-52.7039	-53.2532	-75.4394									76.55	-133.382
76.6	-53.9551	-53.6499	-54.1687	-53.9856	-53.0701	-53.2227	-75.1648									76.6	-132.827
76.65	-53.894	-53.6194	-54.1687	-54.1687	-52.7649	-53.1311	-75.3479									76.65	-132.994
76.7	-53.6499	-53.5583	-53.833	-54.0771	-52.948	-53.1921	-75.3479									76.7	-132.272
76.75	-53.8635	-53.6804	-53.9856	-54.0771	-52.948	-53.3142	-75.0427									76.75	-131.717
76.8	-53.9856	-53.2837	-54.1382	-53.8025	-52.8564	-53.1616	-75.3784									76.8	-131.384
76.85	-53.8025	-53.6804	-54.1077	-54.1077	-52.9785	-53.1006	-75.3174									76.85	-131.218
76.9	-53.7109	-53.4058	-53.833	-54.1687	-52.6123	-53.3142	-75.1953									76.9	-131.052
76.95	-53.9551	-53.6499	-54.0466	-54.1382	-53.1006	-53.2227	-75.3174									76.95	-130.719
77	-53.8635	-53.5583	-54.1992	-54.0466	-52.9175	-53.0701	-74.8901									77	-130.275
77.05	-53.6499	-53.3752	-54.1077	-53.894	-52.9175	-53.3752	-75.2258									77.05	-129.775
77.1	-53.833	-53.6194	-53.894	-54.1382	-53.009	-53.3447	-74.9817									77.1	-128.943
77.15	-53.833	-53.3752	-54.1992	-54.2602	-52.7649	-53.0395	-75.1953									77.15	-128.777
77.2	-53.772	-53.6194	-54.2297	-54.1992	-53.1616	-53.4363	-75.0732									77.2	-128.166
77.25	-53.7415	-53.5583	-54.1992	-53.9856	-53.009	-53.3752	-75.0732									77.25	-128.222
77.3	-53.8025	-53.3447	-53.9246	-53.9551	-52.8259	-53.1006	-74.9512									77.3	-127.833
77.35	-53.8635	-53.6804	-54.2297	-54.1687	-53.1006	-53.3752	-74.9512									77.35	-127.556
77.4	-53.4973	-53.4668	-54.2908	-54.1687	-53.009	-53.4058	-74.9206									77.4	-127.944
77.45	-53.772	-53.5889	-54.1992	-53.9856	-53.009	-53.4058	-74.7681									77.45	-127.445
77.5	-53.8635	-53.5889	-53.894	-54.0161	-53.1311	-53.1311	-74.9817									77.5	-127.278
77.55	-53.6804	-53.3447	-54.1992	-54.1382	-52.8564	-53.5889	-74.6765									77.55	-127.112
77.6	-53.4363	-53.6499	-54.3213	-54.0771	-53.1311	-53.4973	-74.9206									77.6	-126.89
77.65	-53.8635	-53.6804	-54.2602	-53.9246	-53.2227	-53.2532	-74.6155									77.65	-126.668
77.7	-53.7415	-53.4668	-53.894	-54.1077	-52.8259	-53.3447	-74.9206									77.7	-126.002
77.75	-53.6499	-53.7109	-54.1992	-53.9856	-53.1616	-53.5583	-74.7681									77.75	-125.947
77.8	-53.5583	-53.5278	-54.2908	-54.1687	-53.1311	-53.4363	-74.8291									77.8	-125.225
77.85	-53.8635	-53.4668	-54.1992	-54.1687	-52.948	-53.2227	-74.7375									77.85	-125.225
77.9	-53.772	-53.5583	-53.9856	-53.8635	-53.1616	-53.4973	-74.4629									77.9	-125.503
77.95	-53.6499	-53.3752	-54.0161	-54.1382	-53.1311	-53.4668	-74.7681									77.95	-124.504
78	-53.6194	-53.5583	-54.2297	-53.9246	-53.1311	-53.3142	-74.5544									78	-124.837
78.05	-53.833	-53.5583	-54.2908	-54.2908	-53.1921	-53.3752	-74.6765									78.05	-124.837
78.1	-53.8025	-53.1616	-54.1382	-54.0161	-53.1311	-53.4363	-74.6155									78.1	-124.504
78.15	-53.5889	-53.5889	-53.9551	-54.0771	-53.1006	-53.4363	-74.3103									78.15	-124.449
78.2	-53.5889	-53.5583	-54.2908	-54.1382	-53.3752	-53.1921	-74.5544									78.2	-124.227
78.25	-53.8635	-53.3142	-54.2908	-53.9551	-53.2227	-53.4363	-74.3713									78.25	-124.06
78.3	-53.7109	-53.6499	-54.3213	-54.0771	-53.1006	-53.3752	-74.4324									78.3	-123.783
78.35	-53.6804	-53.6804	-54.0466	-53.7415	-53.2532	-53.2227	-74.3408									78.35	-124.06
78.4	-53.5278	-53.3752	-54.1382	-54.0161	-53.1311	-53.2227	-74.0662									78.4	-124.227
78.45	-53.6804	-53.6804	-54.3213	-53.7415	-53.2227	-53.4363	-74.3713									78.45	-123.894
78.5	-53.6804	-53.6194	-54.2297	-54.1687	-53.2532	-53.3447	-74.2187									78.5	-123.561
78.55	-53.5889	-53.3752	-54.1382	-53.833	-53.0701	-53.2837	-74.0967									78.55	-123.727
78.6	-53.4668	-53.7109	-53.9246	-54.1077	-53.0701	-53.2837	-74.3103									78.6	-124.005
78.65	-53.7109	-53.5889	-54.1992	-53.9551	-53.2837	-53.5889	-74.0967									78.65	-123.505
78.7	-53.6804	-53.3447	-54.2908	-54.1077	-53.1311	-53.4058	-74.1272									78.7	-123.394
78.75	-53.6499	-53.6194	-54.2908	-54.0161	-53.0395	-53.3142	-74.1577									78.75	-122.895
78.8	-53.4973	-53.5583	-54.1077	-53.9551	-53.3142	-53.3447	-73.883									78.8	-122.673
78.85	-53.6194	-53.2532	-53.9856	-54.1687	-53.1921	-53.5889	-74.2187									78.85	-122.618
78.9	-53.833	-53.6194	-54.2297	-53.9246	-53.1311	-53.3752	-74.0967									78.9	-122.673
78.95	-53.7415	-53.5278	-54.2602	-54.0771	-53.2837	-53.3142	-73.761									78.95	-122.174
79	-53.5889	-53.3142	-54.2297	-53.7109	-53.2227	-53.2837	-74.1272									79	-121.563
79.05	-53.5889	-53.6194	-54.1077	-54.1382	-53.1006	-53.5583	-73.9441									79.05	-121.397
79.1	-53.833	-53.5583	-54.0161	-54.1687	-53.4363	-53.4668	-73.6389									79.1	-121.008
79.15	-53.8025	-53.2837	-54.2297	-53.9246	-53.2837	-53.2532	-73.9136									79.15	-120.731
79.2	-53.6499	-53.6194	-54.3213	-54.0771	-53.1311	-53.1921	-73.7305									79.2	-120.287
79.25	-53.4363	-53.4973	-54.2908	-53.8635	-53.4363	-53.5583	-73.6084									79.25	-119.899
79.3	-53.6499	-53.3752	-54.2297	-54.1382	-53.4058	-53.4668	-73.7915									79.3	-119.566
79.35	-53.833	-53.4973	-54.1382	-54.0466	-53.1616	-53.3752	-73.6694									79.35	-119.954
79.4	-53.7109	-53.6194	-54.1077	-53.8635	-53.3142	-53.1616	-73.5779									79.4	-119.677
79.45	-53.5889	-53.4363	-54.3823	-54.0771	-53.3752	-53.5583	-73.6999									79.45	-120.121
79.5	-53.4058	-53.4668	-54.3213	-53.9246	-53.3142	-53.5278	-73.5168									79.5	-120.731
79.55	-53.7109	-53.5889	-54.3213	-54.1382	-53.1921	-53.4668	-73.5474									79.55	-120.842
79.6	-53.7415	-53.5278	-54.0771	-54.1382	-53.4363	-53.3142	-73.6084									79.6	-120.676
79.65	-53.6804	-53.4973	-54.0161	-53.8025	-53.3447	-53.5889	-73.5474									79.65	-120.731
79.7	-53.4973	-53.5583	-54.2908	-54.2297	-53.0395	-53.6194	-73.5168									79.7	-120.62
79.75	-53.4363	-53.5278	-54.2908	-54.0771	-53.4058	-53.5583	-73.5168									79.75	-121.064
79.8	-53.6804	-53.3142	-54.2297	-53.9856	-53.3142	-53.4668	-73.3642									79.8	-120.731
79.85	-53.7415	-53.6499	-54.1992	-54.1687	-53.1311	-53.4363	-73.5168									79.85	-120.787
79.9	-53.7415	-53.5583	-53.9551	-54.0466	-53.2837	-53.7415	-73.4253									79.9	-120.62
79.95	-53.7109	-53.2227	-54.2297	-54.1992	-53.3752	-53.6499	-73.2727									79.95	-120.287
80	-53.4363	-53.4973	-54.2297	-54.1382	-53.4058	-53.6804	-73.2422									80	-120.62
80.05	-53.6804	-53.5278	-54.1382	-53.9551	-53.1311	-53.5278	-73.3948									80.05	-120.62
80.1	-53.7415	-53.4668	-54.0161	-54.2297	-53.5583	-53.5889	-73.2117									80.1	-120.121
80.15	-53.772	-53.2837	-54.3823	-54.2908	-53.4363	-53.833	-73.0591									80.15	-120.01
80.2	-53.7109	-53.5889	-54.2297	-53.8025	-53.3447	-53.6499	-73.2422									80.2	-119.566
80.25	-53.3752	-53.5583	-53.9246	-54.1992	-53.4058	-53.6499	-73.1506									80.25	-119.788
80.3	-53.6194	-53.3447	-54.2908	-54.1077	-53.5889	-53.4973	-72.9065									80.3	-119.788
80.35	-53.7415	-53.5583	-54.1992	-53.833	-53.5583	-53.7109	-73.1506									80.35	-119.788
80.4	-53.6194	-53.5583	-54.1077	-54.2908	-53.1616	-53.772	-73.0591									80.4	-119.899
80.45	-53.7415	-53.5278	-54.1992	-54.0771	-53.4973	-53.7415	-72.7539									80.45	-120.01
80.5	-53.4973	-53.3752	-53.9246	-54.0466	-53.5278	-53.7109	-73.1811									80.5	-120.01
80.55	-53.5278	-53.6804	-54.3823	-54.1992	-53.4668	-53.5278	-73.0286									80.55	-119.732
80.6	-53.8025	-53.6194	-54.1992	-54.0466	-53.2532	-53.7109	-72.7539									80.6	-119.843
80.65	-53.8025	-53.3447	-54.1992	-54.1077	-53.4363	-53.8025	-72.998									80.65	-119.677
80.7	-53.6499	-53.5583	-54.1992	-54.2297	-53.4668	-53.8025	-73.0286									80.7	-119.51
80.75	-53.4058	-53.6804	-53.9246	-54.1382	-53.3447	-53.833	-72.8149									80.75	-119.122
80.8	-53.8025	-53.5278	-54.1687	-54.1687	-53.3447	-53.5278	-72.7844									80.8	-119.843
80.85	-53.772	-53.2837	-53.9551	-54.1077	-53.5583	-53.6499	-72.9675									80.85	-119.843
80.9	-53.4973	-53.6804	-54.1992	-54.1077	-53.4668	-53.833	-72.8455									80.9	-119.788
80.95	-53.772	-53.5889	-53.9856	-54.2297	-53.3752	-53.894	-72.7539									80.95	-119.954
81	-53.833	-53.4363	-54.3213	-54.2908	-53.4363	-53.772	-72.8149									81	-120.065
81.05	-53.5583	-53.3447	-54.0771	-54.0466	-53.6194	-53.5889	-72.7234									81.05	-119.732
81.1	-53.8025	-53.6499	-54.2602	-54.1687	-53.4973	-53.6499	-72.5403									81.1	-120.065
81.15	-53.7109	-53.6194	-54.2602	-54.1992	-53.4363	-53.894	-72.8149									81.15	-119.677
81.2	-53.7109	-53.4058	-54.1382	-54.0466	-53.4973	-53.8635	-72.7844									81.2	-119.344
81.25	-53.833	-53.3752	-54.3518	-54.0771	-53.5889	-53.8025	-72.6318									81.25	-119.677
81.3	-53.4058	-53.772	-53.894	-54.2297	-53.6499	-53.5889	-72.4487									81.3	-119.566
81.35	-53.6804	-53.5889	-54.3823	-54.1077	-53.5278	-53.833	-72.7234									81.35	-119.788
81.4	-53.4668	-53.5583	-54.1687	-53.9856	-53.5278	-53.8635	-72.6623									81.4	-120.343
81.45	-53.772	-53.4668	-54.3213	-54.2297	-53.6804	-53.772	-72.3877									81.45	-121.175
81.5	-53.6499	-53.8025	-54.1992	-54.0771	-53.5889	-53.772	-72.5708									81.5	-121.008
81.55	-53.6499	-53.6804	-54.0466	-53.9856	-53.4973	-53.9856	-72.6318									81.55	-121.064
81.6	-53.7109	-53.4668	-54.3518	-54.2602	-53.4973	-53.8025	-72.5098									81.6	-121.175
81.65	-53.5889	-53.4363	-54.1992	-54.1687	-53.7109	-53.8635	-72.3572									81.65	-121.064
81.7	-53.7415	-53.772	-54.3213	-53.894	-53.6499	-54.0466	-72.6318									81.7	-121.508
81.75	-53.3752	-53.6804	-54.3213	-54.2297	-53.5889	-53.8025	-72.6318									81.75	-121.175
81.8	-53.6194	-53.5583	-54.0161	-54.2297	-53.3447	-54.1382	-72.3877									81.8	-121.397
81.85	-53.4668	-53.3752	-54.3518	-54.0466	-53.6804	-53.8635	-72.3572									81.85	-121.452
81.9	-53.772	-53.7109	-54.2602	-54.1992	-53.7415	-54.0466	-72.5708									81.9	-121.73
81.95	-53.6194	-53.5889	-54.0466	-54.1992	-53.5889	-54.0466	-72.5708									81.95	-121.73
82	-53.7415	-53.5583	-54.2908	-54.0161	-53.5583	-53.9856	-72.3267									82	-121.563
82.05	-53.772	-53.3142	-54.1992	-54.2297	-53.6194	-54.0466	-72.4182									82.05	-121.452
82.1	-53.5583	-53.6194	-54.1382	-54.2602	-53.8025	-53.7415	-72.4487									82.1	-121.341
82.15	-53.7109	-53.6194	-54.2908	-54.1382	-53.833	-54.0771	-72.3572									82.15	-120.287
82.2	-53.4668	-53.6194	-54.0771	-54.0161	-53.7109	-53.772	-72.0825									82.2	-120.01
82.25	-53.9246	-53.4058	-54.3518	-54.2908	-53.5583	-54.1687	-72.4487									82.25	-119.621
82.3	-53.772	-53.5583	-54.3518	-54.1992	-53.8025	-53.8635	-72.3572									82.3	-119.122
82.35	-53.5583	-53.772	-54.0161	-53.833	-53.8635	-54.1382	-72.2351									82.35	-118.512
82.4	-53.8025	-53.6499	-54.4128	-54.1382	-53.833	-54.1992	-72.052									82.4	-118.734
82.45	-53.4058	-53.4973	-54.4434	-54.1382	-53.772	-54.0466	-72.2656									82.45	-118.567
82.5	-53.6804	-53.4668	-54.0466	-54.0466	-53.5889	-54.0771	-72.2656									82.5	-118.234
82.55	-53.7109	-53.7109	-54.4128	-54.0161	-53.8635	-53.9246	-72.113									82.55	-117.846
82.6	-53.4363	-53.7109	-54.3213	-54.1992	-53.894	-54.1992	-72.0215									82.6	-117.679
82.65	-53.6194	-53.6499	-54.1077	-54.1992	-53.8635	-53.894	-72.1741									82.65	-117.402
82.7	-53.5583	-53.4363	-54.4434	-53.8635	-53.6499	-54.1992	-72.2961									82.7	-117.346
82.75	-53.6499	-53.5889	-54.3823	-54.2297	-53.6804	-54.0161	-72.1435									82.75	-117.291
82.8	-53.6194	-53.833	-54.0466	-54.1382	-53.9246	-54.1992	-71.991									82.8	-116.902
82.85	-53.4668	-53.6804	-54.4434	-54.1077	-53.894	-54.2908	-72.2046									82.85	-116.57
82.9	-53.8025	-53.6499	-54.3823	-54.0771	-53.8635	-54.0161	-72.1741									82.9	-116.459
82.95	-53.6804	-53.4668	-54.0771	-54.2297	-53.7415	-54.2297	-72.113									82.95	-116.459
83	-53.3752	-53.5583	-54.4128	-54.1992	-53.772	-53.9551	-71.8384									83	-116.459
83.05	-53.7109	-53.772	-54.3213	-53.9856	-54.0466	-54.3518	-72.113									83.05	-116.292
83.1	-53.6804	-53.6194	-54.0771	-54.2602	-54.0161	-54.2602	-72.1435									83.1	-115.737
83.15	-53.5583	-53.5889	-54.3823	-54.1992	-53.9551	-53.9551	-72.0825									83.15	-115.848
83.2	-53.6804	-53.4973	-54.3518	-54.0161	-53.833	-54.2602	-71.9299									83.2	-115.682
83.25	-53.6804	-53.6194	-54.0161	-53.9246	-53.8635	-54.1077	-71.9299									83.25	-115.404
83.3	-53.4668	-53.772	-54.5349	-54.1382	-54.1077	-54.2297	-72.113									83.3	-115.515
83.35	-53.7415	-53.6804	-54.3518	-54.0771	-54.0466	-54.3213	-71.9299									83.35	-116.126
83.4	-53.5889	-53.7109	-54.1077	-54.0161	-54.0161	-54.0161	-71.9299									83.4	-116.514
83.45	-53.5583	-53.4668	-54.3823	-53.894	-54.0161	-54.3823	-71.7773									83.45	-116.514
83.5	-53.7109	-53.6194	-54.5044	-54.1077	-53.894	-54.2908	-71.991									83.5	-116.736
83.55	-53.5583	-53.7109	-54.2297	-54.0466	-53.9551	-54.1687	-71.9604									83.55	-117.013
83.6	-53.5889	-53.772	-54.3823	-53.9551	-54.1992	-54.4434	-71.9299									83.6	-117.235
83.65	-53.6499	-53.8025	-54.3518	-53.833	-54.1382	-54.3518	-71.8384									83.65	-117.291
83.7	-53.4363	-53.4668	-54.2602	-54.2602	-54.0771	-54.2908	-71.7773									83.7	-117.18
83.75	-53.5583	-53.7109	-54.3518	-54.1077	-53.833	-54.4434	-72.052									83.75	-116.459
83.8	-53.5889	-53.8635	-54.5044	-53.9551	-54.1077	-54.2602	-71.9299									83.8	-116.736
83.85	-53.4973	-53.8025	-54.3518	-53.9246	-54.1382	-54.4739	-71.9604									83.85	-116.292
83.9	-53.5278	-53.5583	-54.1077	-54.2602	-54.0161	-54.5044	-71.8079									83.9	-116.57
83.95	-53.6804	-53.7415	-54.5654	-54.1077	-54.0466	-54.1687	-71.7773									83.95	-116.459
84	-53.5889	-53.7415	-54.4128	-53.9856	-54.2602	-54.3823	-71.991									84	-116.902
84.05	-53.5889	-53.4058	-54.1077	-53.8635	-54.0466	-54.4434	-71.8689									84.05	-116.459
84.1	-53.7109	-53.833	-54.3518	-54.1992	-54.1077	-54.1687	-71.8384									84.1	-116.681
84.15	-53.5889	-53.6194	-54.4128	-54.1687	-54.2297	-54.4739	-71.5637									84.15	-116.514
84.2	-53.5583	-53.6194	-54.3213	-54.0466	-54.1077	-54.4128	-71.6553									84.2	-115.959
84.25	-53.7109	-53.8635	-54.3213	-53.7415	-54.2297	-54.1687	-71.8384									84.25	-116.07
84.3	-53.5889	-53.4363	-54.4739	-54.0771	-54.3518	-54.5044	-71.7468									84.3	-115.737
84.35	-53.4058	-53.8635	-54.4434	-54.0771	-54.0771	-54.5044	-71.7163									84.35	-115.46
84.4	-53.772	-53.6194	-54.1992	-54.0161	-54.2602	-54.1687	-71.5332									84.4	-115.349
84.45	-53.5889	-53.894	-54.4434	-53.772	-54.0771	-54.5044	-71.5332									84.45	-115.127
84.5	-53.3142	-53.6804	-54.4434	-53.9551	-54.3518	-54.5654	-71.7163									84.5	-114.96
84.55	-53.6804	-53.7109	-54.3518	-54.0771	-54.2602	-54.1687	-71.6553									84.55	-115.071
84.6	-53.6499	-53.8025	-54.4434	-54.0771	-54.2602	-54.5959	-71.5942									84.6	-114.572
84.65	-53.4668	-53.6804	-54.3823	-53.9551	-54.2908	-54.5044	-71.3501									84.65	-114.017
84.7	-53.5889	-53.8635	-54.3823	-53.8635	-54.2297	-54.2602	-71.6858									84.7	-113.962
84.75	-53.5889	-53.4973	-54.1077	-54.1382	-54.3823	-54.718	-71.6247									84.75	-113.684
84.8	-53.5583	-53.8025	-54.4739	-54.0161	-54.1077	-54.5349	-71.5942									84.8	-113.462
84.85	-53.5278	-53.4363	-54.4739	-54.0466	-54.3213	-54.3213	-71.3501									84.85	-113.407
84.9	-53.7109	-53.8635	-54.2602	-53.772	-54.0161	-54.6265	-71.6858									84.9	-113.462
84.95	-53.5889	-53.6194	-54.2297	-53.9856	-54.4128	-54.6265	-71.5942									84.95	-113.185
85	-53.5583	-53.833	-54.5044	-54.2297	-54.2602	-54.1687	-71.228									85	-113.24
85.05	-53.7415	-53.6804	-54.4434	-54.0771	-54.3518	-54.5654	-71.5637									85.05	-112.852
85.1	-53.6499	-53.6804	-54.1992	-53.9856	-54.3213	-54.5349	-71.5332									85.1	-112.852
85.15	-53.4363	-53.833	-54.3213	-53.772	-54.2297	-54.3518	-71.2891									85.15	-113.074
85.2	-53.772	-53.4973	-54.5044	-54.0161	-54.3213	-54.5349	-71.4416									85.2	-112.575
85.25	-53.772	-53.833	-54.4128	-54.1687	-54.0771	-54.5654	-71.1059									85.25	-112.242
85.3	-53.6194	-53.6499	-54.1077	-53.9856	-54.3823	-54.3823	-71.4722									85.3	-112.519
85.35	-53.4973	-53.8635	-54.4434	-53.9246	-54.4739	-54.4434	-71.2891									85.35	-112.519
85.4	-53.833	-53.833	-54.4434	-53.6804	-54.2908	-54.6875	-71.3806									85.4	-112.963
85.45	-53.7109	-53.5889	-54.4739	-54.0466	-54.4128	-54.5654	-71.2891									85.45	-112.852
85.5	-53.5583	-53.894	-54.0771	-54.1077	-54.1992	-54.3823	-71.167									85.5	-113.129
85.55	-53.6194	-53.5583	-54.4128	-54.0466	-54.5044	-54.779	-71.3806									85.55	-113.018
85.6	-53.6499	-53.8635	-54.4739	-53.9246	-54.5349	-54.7485	-70.9534									85.6	-113.351
85.65	-53.5889	-53.894	-54.3518	-53.833	-54.1687	-54.3213	-71.228									85.65	-113.74
85.7	-53.4058	-53.6194	-54.0466	-54.1382	-54.4434	-54.718	-70.9228									85.7	-113.795
85.75	-53.7415	-53.9551	-54.3518	-53.9551	-54.3823	-54.779	-71.3196									85.75	-114.295
85.8	-53.6499	-53.772	-54.3823	-53.9856	-54.3213	-54.5959	-71.0449									85.8	-114.628
85.85	-53.6194	-53.772	-54.3213	-53.9246	-54.4739	-54.5654	-71.2585									85.85	-115.071
85.9	-53.4973	-53.833	-54.1382	-54.1382	-54.1382	-54.718	-71.228									85.9	-115.515
85.95	-53.8025	-53.5583	-54.1992	-53.9551	-54.4739	-54.657	-71.228									85.95	-115.848
86	-53.7109	-53.8635	-54.3518	-53.9856	-54.4128	-54.4739	-71.2585									86	-116.015
86.05	-53.5889	-53.8025	-54.3213	-54.1077	-54.1382	-54.7485	-70.9228									86.05	-115.848
86.1	-53.6804	-53.4668	-54.1077	-53.894	-54.4434	-54.6875	-71.1365									86.1	-116.07
86.15	-53.772	-53.9246	-54.3213	-54.1382	-54.4128	-54.4739	-70.8008									86.15	-115.571
86.2	-53.772	-53.8025	-54.3823	-54.0771	-54.1992	-54.718	-71.1365									86.2	-115.848
86.25	-53.5278	-53.6194	-54.4434	-53.9246	-54.5654	-54.657	-70.9534									86.25	-115.515
86.3	-53.772	-53.8635	-54.2908	-54.1077	-54.4128	-54.6265	-70.8923									86.3	-115.127
86.35	-53.8025	-53.833	-54.1382	-53.6499	-54.1687	-54.4128	-71.0144									86.35	-115.293
86.4	-53.772	-53.8025	-54.4739	-54.1382	-54.5654	-54.779	-70.6482									86.4	-114.849
86.45	-53.5278	-53.894	-54.3823	-53.9246	-54.5044	-54.718	-71.0144									86.45	-115.016
86.5	-53.7415	-53.7109	-54.3823	-54.0161	-54.2297	-54.5654	-70.8313									86.5	-114.849
86.55	-53.833	-53.9551	-53.9856	-53.9551	-54.5044	-54.6265	-70.7397									86.55	-114.738
86.6	-53.6804	-53.894	-54.3518	-53.9246	-54.4128	-54.8096	-70.8008									86.6	-114.073
86.65	-53.4058	-53.6499	-54.4434	-54.0771	-54.4128	-54.779	-70.5261									86.65	-113.795
86.7	-53.7109	-53.9246	-54.3823	-53.894	-54.4434	-54.4128	-70.8313									86.7	-114.017
86.75	-53.7415	-53.9551	-54.1992	-54.0161	-54.3518	-54.779	-70.6787									86.75	-113.24
86.8	-53.772	-53.7415	-54.0771	-53.8025	-54.3823	-54.8401	-70.5872									86.8	-113.018
86.85	-53.4058	-53.8635	-54.3823	-54.0771	-54.4739	-54.8401	-70.7703									86.85	-113.462
86.9	-53.6804	-53.8635	-54.2908	-53.7415	-54.5044	-54.4739	-70.5872									86.9	-112.852
86.95	-53.8025	-53.6194	-54.3518	-54.0771	-54.2908	-54.8401	-70.5872									86.95	-112.796
87	-53.6804	-53.9246	-54.1382	-53.772	-54.4434	-54.8096	-70.7092									87	-112.907
87.05	-53.4973	-53.8635	-54.1687	-54.1382	-54.4434	-54.6875	-70.4651									87.05	-113.296
87.1	-53.6194	-53.4973	-54.4128	-53.9856	-54.2297	-54.5959	-70.6482									87.1	-113.185
87.15	-53.8025	-53.894	-54.3518	-54.0161	-54.5959	-54.779	-70.6177									87.15	-113.629
87.2	-53.6804	-53.833	-54.2908	-53.9856	-54.5654	-54.779	-70.404									87.2	-114.017
87.25	-53.5889	-53.6194	-54.1077	-53.8635	-54.3213	-54.657	-70.6787									87.25	-113.795
87.3	-53.5278	-53.9246	-54.2908	-54.0466	-54.5349	-54.5959	-70.5261									87.3	-113.962
87.35	-53.833	-53.9246	-54.4739	-53.7109	-54.5044	-54.9011	-70.2209									87.35	-114.461
87.4	-53.7415	-53.7109	-54.3518	-54.0161	-54.1992	-54.8096	-70.5872									87.4	-114.128
87.45	-53.6499	-53.8635	-54.4128	-53.894	-54.6265	-54.779	-70.404									87.45	-114.073
87.5	-53.4668	-53.9246	-54.2908	-53.8635	-54.5654	-54.6265	-70.1904									87.5	-114.017
87.55	-53.6194	-53.772	-54.3213	-53.9551	-54.2908	-54.9316	-70.4346									87.55	-113.851
87.6	-53.833	-53.9856	-54.4128	-53.7109	-54.4739	-54.779	-70.3125									87.6	-114.017
87.65	-53.8025	-53.9856	-54.3518	-53.9856	-54.5654	-54.8401	-70.1599									87.65	-114.073
87.7	-53.5278	-53.7415	-54.3823	-53.894	-54.4434	-54.657	-70.3125									87.7	-114.461
87.75	-53.4363	-53.833	-54.2297	-53.772	-54.4128	-54.9011	-70.1599									87.75	-113.851
87.8	-53.7415	-54.0161	-54.0771	-53.9246	-54.5654	-54.8401	-70.0989									87.8	-114.461
87.85	-53.772	-53.9246	-54.3823	-53.6804	-54.5044	-54.8401	-70.3735									87.85	-114.461
87.9	-53.6804	-53.6499	-54.4128	-54.1077	-54.2602	-54.657	-70.1294									87.9	-114.406
87.95	-53.6499	-53.9856	-54.3823	-54.0161	-54.5959	-54.779	-70.0378									87.95	-114.628
88	-53.5278	-53.894	-54.3213	-53.6804	-54.5044	-54.9011	-70.1904									88	-114.295
88.05	-53.8025	-53.5583	-54.1687	-53.9551	-54.2297	-54.8401	-70.1599									88.05	-114.239
88.1	-53.7415	-53.9246	-54.2297	-53.894	-54.5959	-54.657	-70.0989									88.1	-114.128
88.15	-53.8025	-53.894	-54.5044	-53.9246	-54.5959	-54.7485	-70.0989									88.15	-114.184
88.2	-53.6194	-53.6804	-54.3518	-53.9551	-54.4434	-54.9011	-69.9158									88.2	-114.295
88.25	-53.5583	-53.8025	-54.3823	-53.7415	-54.3518	-54.8706	-69.8852									88.25	-113.851
88.3	-53.7109	-53.894	-54.1077	-53.9551	-54.718	-54.6875	-70.0684									88.3	-113.573
88.35	-53.8025	-53.833	-54.4739	-53.9551	-54.5959	-54.6265	-69.9768									88.35	-112.741
88.4	-53.8025	-53.6499	-54.4434	-53.5889	-54.2297	-54.8401	-69.7021									88.4	-112.796
88.45	-53.6194	-54.0466	-54.3213	-53.9246	-54.5654	-54.9011	-69.9768									88.45	-111.909
88.5	-53.4058	-53.894	-54.3518	-53.894	-54.6265	-54.9622	-69.8242									88.5	-112.02
88.55	-53.6804	-53.6804	-54.5349	-53.6499	-54.5959	-54.6265	-69.7021									88.55	-112.353
88.6	-53.6804	-53.9246	-54.3518	-53.9856	-54.3518	-54.5959	-69.8242									88.6	-111.853
88.65	-53.7415	-53.9856	-54.4128	-53.8635	-54.6875	-54.8706	-69.7327									88.65	-112.685
88.7	-53.5889	-53.833	-54.4739	-53.6499	-54.5654	-54.9316	-69.519									88.7	-112.63
88.75	-53.4058	-53.7415	-54.2602	-53.9856	-54.3518	-54.8706	-69.7937									88.75	-112.02
88.8	-53.5889	-53.9551	-54.5349	-53.8025	-54.5349	-54.5959	-69.7327									88.8	-111.687
88.85	-53.7109	-53.9551	-54.4434	-53.772	-54.6265	-54.718	-69.4885									88.85	-111.631
88.9	-53.6804	-53.6804	-54.3823	-53.9246	-54.5959	-54.9622	-69.8242									88.9	-111.964
88.95	-53.6499	-53.894	-54.4739	-53.833	-54.2908	-54.9622	-69.7632									88.95	-111.964
89	-53.4363	-53.894	-54.1687	-53.833	-54.6265	-54.8096	-69.5801									89	-112.186
89.05	-53.6499	-53.833	-54.5044	-53.8635	-54.6265	-54.5654	-69.5801									89.05	-112.075
89.1	-53.6804	-53.6499	-54.2297	-53.8025	-54.5959	-54.718	-69.7632									89.1	-112.242
89.15	-53.5583	-53.9551	-54.5349	-53.894	-54.4434	-54.9011	-69.7327									89.15	-111.687
89.2	-53.5889	-53.772	-54.4128	-54.0161	-54.7485	-54.9011	-69.3359									89.2	-112.242
89.25	-53.8025	-53.7109	-54.5349	-53.772	-54.6265	-54.7485	-69.6716									89.25	-112.131
89.3	-53.6804	-53.6804	-54.5044	-53.8635	-54.5654	-54.6875	-69.5801									89.3	-111.576
89.35	-53.4973	-53.8635	-54.4128	-53.8635	-54.5349	-54.657	-69.2749									89.35	-111.687
89.4	-53.7415	-53.8635	-54.5959	-53.7415	-54.8401	-54.8706	-69.519									89.4	-111.354
89.45	-53.5583	-53.5889	-54.4128	-53.9246	-54.657	-54.8401	-69.5496									89.45	-111.687
89.5	-53.6194	-53.6804	-54.5044	-53.833	-54.657	-54.8096	-69.397									89.5	-111.354
89.55	-53.5889	-53.894	-54.2908	-53.772	-54.5349	-54.657	-69.2139									89.55	-111.243
89.6	-53.4363	-53.8635	-54.5349	-53.772	-54.8096	-54.718	-69.5496									89.6	-110.965
89.65	-53.5583	-53.5278	-54.4128	-53.9246	-54.718	-54.9316	-69.3664									89.65	-111.187
89.7	-53.4058	-53.8635	-54.4739	-53.8025	-54.6265	-54.8706	-69.1833									89.7	-111.409
89.75	-53.6194	-53.9246	-54.5349	-53.7415	-54.4739	-54.7485	-69.3664									89.75	-110.965
89.8	-53.4668	-53.833	-54.3213	-54.0466	-54.8096	-54.9927	-69.397									89.8	-111.409
89.85	-53.6499	-53.5889	-54.5349	-53.833	-54.718	-54.9011	-69.2444									89.85	-111.52
89.9	-53.5583	-53.8025	-54.3518	-53.7109	-54.657	-54.5654	-69.0918									89.9	-111.243
89.95	-53.5583	-53.9856	-54.4434	-54.0466	-54.4434	-55.0232	-69.397									89.95	-111.243
90	-53.6194	-53.8635	-54.4128	-53.9856	-54.779	-54.9316	-69.2444									90	-110.91
90.05	-53.4363	-53.5889	-54.1687	-53.8025	-54.779	-54.6265	-69.1528									90.05	-110.91
90.1	-53.6194	-53.8025	-54.5654	-54.0466	-54.6265	-54.8706	-69.0918									90.1	-110.244
90.15	-53.3142	-53.894	-54.3823	-53.9856	-54.5349	-54.779	-69.3054									90.15	-110.577
90.2	-53.7109	-53.8025	-54.4434	-53.772	-54.7485	-54.9622	-69.3054									90.2	-109.578
90.25	-53.4973	-53.6194	-54.5959	-54.0466	-54.8096	-54.9011	-68.9392									90.25	-109.412
90.3	-53.7109	-53.6804	-54.2908	-53.9246	-54.7485	-54.718	-69.0613									90.3	-109.301
90.35	-53.6194	-53.9246	-54.4128	-53.833	-54.5959	-54.8401	-69.1833									90.35	-109.245
90.4	-53.4973	-53.8635	-54.4739	-53.9246	-54.6265	-54.5959	-69.0918									90.4	-109.079
90.45	-53.6194	-53.7415	-54.3518	-53.9856	-54.8401	-54.8706	-68.8476									90.45	-108.968
90.5	-53.3142	-53.4973	-54.657	-53.833	-54.7485	-54.5654	-68.9392									90.5	-108.469
90.55	-53.6499	-53.9246	-54.4739	-53.6804	-54.779	-54.9622	-69.0002									90.55	-107.747
90.6	-53.4973	-53.894	-54.3518	-54.0161	-54.5959	-54.8401	-68.9087									90.6	-107.525
90.65	-53.4973	-53.772	-54.5959	-53.9856	-54.779	-55.0232	-68.7256									90.65	-107.303
90.7	-53.5278	-53.6804	-54.5349	-53.7415	-54.8096	-54.9011	-69.0002									90.7	-106.526
90.75	-53.3447	-53.8635	-54.2908	-53.9246	-54.7485	-54.9622	-68.9087									90.75	-106.249
90.8	-53.6194	-54.0161	-54.5044	-53.9246	-54.7485	-55.0232	-69.0002									90.8	-105.916
90.85	-53.5278	-53.833	-54.2908	-53.9246	-54.4739	-54.8706	-68.6951									90.85	-106.138
90.9	-53.4668	-53.7109	-54.3518	-53.8025	-54.9011	-54.9622	-68.9392									90.9	-105.972
90.95	-53.6804	-53.6804	-54.5654	-54.0771	-54.779	-54.6875	-68.9392									90.95	-106.249
91	-53.5583	-53.894	-54.3518	-53.9856	-54.8401	-55.0842	-68.9392									91	-105.417
91.05	-53.5889	-53.8635	-54.3823	-53.772	-54.6875	-54.9011	-68.7256									91.05	-105.25
91.1	-53.6499	-53.8635	-54.4434	-54.0161	-54.5654	-55.0232	-68.8782									91.1	-105.25
91.15	-53.3447	-53.772	-54.2908	-54.0161	-54.8401	-54.9316	-68.9392									91.15	-105.084
91.2	-53.6194	-53.7109	-54.4128	-53.9246	-54.8706	-54.8401	-68.9087									91.2	-105.306
91.25	-53.7109	-53.9246	-54.4128	-53.8025	-54.9011	-55.0842	-68.7256									91.25	-105.361
91.3	-53.3752	-53.8635	-54.3518	-54.1992	-54.779	-54.8706	-68.7866									91.3	-105.639
91.35	-53.8025	-53.8635	-54.3518	-54.0771	-54.5959	-55.0537	-68.8171									91.35	-105.084
91.4	-53.6194	-53.6499	-54.4739	-53.8635	-54.8706	-55.0232	-68.7866									91.4	-104.917
91.45	-53.4058	-53.7109	-54.3823	-53.9551	-55.0232	-54.8401	-68.634									91.45	-104.751
91.5	-53.6804	-53.9246	-54.4434	-54.0466	-54.9622	-55.1453	-68.6035									91.5	-104.973
91.55	-53.6499	-53.9246	-54.5349	-54.0466	-54.8401	-54.8401	-68.7561									91.55	-105.472
91.6	-53.5278	-53.9246	-54.3518	-53.772	-54.6875	-55.0537	-68.6951									91.6	-105.583
91.65	-53.6499	-53.772	-54.3518	-53.9551	-54.9011	-55.1453	-68.6645									91.65	-105.139
91.7	-53.5278	-53.6499	-54.5654	-54.1077	-55.0232	-54.7485	-68.3594									91.7	-105.583
91.75	-53.4668	-53.9551	-54.4739	-54.1077	-54.9011	-55.2368	-68.6951									91.75	-105.805
91.8	-53.6499	-53.9551	-54.3213	-53.833	-54.8706	-55.0537	-68.7866									91.8	-105.583
91.85	-53.4363	-53.9856	-54.5044	-54.0161	-54.7485	-55.0537	-68.7256									91.85	-105.361
91.9	-53.4668	-53.7415	-54.4128	-54.1687	-54.6875	-55.2063	-68.512									91.9	-105.361
91.95	-53.6499	-53.7109	-54.1382	-54.0771	-54.9927	-55.0232	-68.3289									91.95	-105.417
92	-53.4668	-53.9856	-54.5349	-53.833	-54.8401	-55.1453	-68.573									92	-105.361
92.05	-53.4973	-53.9856	-54.4739	-54.1077	-54.779	-55.2063	-68.6645									92.05	-105.028
92.1	-53.6499	-53.8025	-54.1687	-54.1687	-54.6875	-55.0537	-68.7256									92.1	-105.028
92.15	-53.5278	-53.6804	-54.5349	-54.1077	-54.9011	-55.1758	-68.4204									92.15	-104.806
92.2	-53.5889	-53.9856	-54.4739	-53.8635	-54.9011	-55.1147	-68.3899									92.2	-104.973
92.25	-53.6804	-53.9246	-54.2297	-54.1077	-54.7485	-54.8096	-68.6645									92.25	-105.25
92.3	-53.4973	-53.6194	-54.3823	-54.1382	-54.6875	-55.2673	-68.573									92.3	-104.917
92.35	-53.4973	-53.9246	-54.5959	-54.1077	-54.9927	-55.2673	-68.5425									92.35	-105.195
92.4	-53.6804	-53.894	-54.3518	-53.833	-54.9011	-54.9011	-68.2373									92.4	-104.584
92.45	-53.5889	-53.6499	-54.2602	-54.0771	-54.6875	-55.2063	-68.3899									92.45	-104.196
92.5	-53.3752	-53.9246	-54.5044	-54.0771	-54.9622	-55.1758	-68.512									92.5	-104.473
92.55	-53.6499	-53.772	-54.5349	-54.0466	-54.8401	-54.9622	-68.4509									92.55	-104.03
92.6	-53.5583	-53.9551	-54.2908	-53.8635	-54.9316	-55.2978	-68.512									92.6	-103.752
92.65	-53.2532	-54.0161	-54.4739	-53.9551	-54.9316	-55.1147	-68.2678									92.65	-103.419
92.7	-53.5889	-53.8025	-54.5044	-53.9856	-54.718	-55.0842	-68.3594									92.7	-103.752
92.75	-53.5583	-53.9856	-54.3518	-54.1077	-54.9927	-55.2673	-68.4509									92.75	-103.974
92.8	-53.3142	-53.7109	-54.4128	-53.8635	-54.5654	-55.1147	-68.4204									92.8	-103.974
92.85	-53.5889	-53.9551	-54.5654	-53.833	-54.9011	-55.0842	-68.3594									92.85	-103.863
92.9	-53.5583	-53.7109	-54.4128	-54.1077	-54.779	-55.4199	-68.3594									92.9	-103.641
92.95	-53.4058	-53.9856	-54.1992	-54.1077	-54.8706	-55.3589	-68.1763									92.95	-103.475
93	-53.5278	-53.8025	-54.5349	-54.0161	-54.9316	-55.0842	-68.4509									93	-103.197
93.05	-53.5583	-54.0161	-54.4434	-53.833	-54.6875	-55.3589	-68.3899									93.05	-102.642
93.1	-53.4973	-53.894	-54.3823	-54.0771	-54.8706	-55.2673	-68.3289									93.1	-103.031
93.15	-53.3447	-54.0466	-54.2297	-54.1382	-54.5959	-55.2063	-68.2373									93.15	-102.698
93.2	-53.7109	-53.894	-54.5044	-54.2297	-54.9011	-55.3894	-68.3899									93.2	-102.92
93.25	-53.6804	-53.7415	-54.5044	-53.9551	-54.5654	-55.1758	-68.3289									93.25	-102.531
93.3	-53.2227	-53.9856	-54.2297	-53.833	-54.8706	-55.0842	-68.0847									93.3	-103.197
93.35	-53.6194	-53.6194	-54.4128	-54.1687	-54.8706	-55.3284	-68.4204									93.35	-102.864
93.4	-53.6804	-53.9551	-54.5654	-54.1687	-54.8096	-55.3589	-68.2068									93.4	-103.53
93.45	-53.5278	-53.5889	-54.6265	-54.0466	-54.9316	-55.0537	-68.0847									93.45	-103.586
93.5	-53.4363	-54.0466	-54.2908	-53.8025	-54.657	-55.2978	-68.1457									93.5	-103.197
93.55	-53.5889	-53.772	-54.5959	-53.894	-54.9316	-55.3284	-67.9321									93.55	-103.419
93.6	-53.4973	-53.9551	-54.5654	-54.1382	-54.657	-55.0842	-68.3289									93.6	-103.919
93.65	-53.2227	-53.9551	-54.4739	-54.1382	-54.9011	-55.2673	-68.0542									93.65	-103.031
93.7	-53.5583	-53.7109	-54.2602	-54.0161	-54.8706	-55.2673	-68.1457									93.7	-103.086
93.75	-53.4363	-54.0161	-54.657	-53.8025	-54.6265	-55.2673	-68.2068									93.75	-103.142
93.8	-53.3752	-53.6804	-54.5654	-53.8635	-54.9011	-55.2368	-68.0542									93.8	-102.809
93.85	-53.3142	-53.9246	-54.4739	-54.1382	-54.779	-55.3284	-68.1457									93.85	-103.419
93.9	-53.5278	-53.9246	-54.4128	-54.1077	-54.8401	-55.2368	-67.8406									93.9	-102.753
93.95	-53.4973	-53.7109	-54.5654	-54.0771	-54.8706	-55.1758	-68.2678									93.95	-103.086
94	-53.1616	-53.894	-54.5959	-53.8635	-54.5959	-55.4504	-67.8406									94	-102.864
94.05	-53.4973	-53.7415	-54.3823	-54.0771	-54.9011	-55.3589	-68.2068									94.05	-103.308
94.1	-53.4973	-53.9246	-54.3518	-54.0771	-54.7485	-55.0537	-67.7795									94.1	-103.752
94.15	-53.4058	-53.9246	-54.5654	-54.0771	-54.5959	-55.4199	-68.1763									94.15	-103.53
94.2	-53.1921	-53.5583	-54.4434	-53.8635	-54.8706	-55.4199	-68.0237									94.2	-103.53
94.25	-53.5278	-53.9551	-54.4434	-54.2297	-54.657	-55.1758	-68.0237									94.25	-103.919
94.3	-53.4668	-53.833	-54.3213	-54.0466	-54.7485	-55.2673	-67.9016									94.3	-103.752
94.35	-53.3142	-53.7109	-54.5959	-53.8025	-54.718	-55.3589	-67.9016									94.35	-103.974
94.4	-53.1616	-53.9246	-54.5349	-54.1382	-54.657	-55.2673	-68.0237									94.4	-104.196
94.45	-53.5583	-53.772	-54.5959	-53.9551	-54.9622	-55.0842	-67.6575									94.45	-104.363
94.5	-53.5278	-53.772	-54.3213	-53.9856	-54.9011	-55.2978	-67.9016									94.5	-104.473
94.55	-53.2532	-53.9551	-54.5959	-54.0466	-54.5959	-55.2673	-67.7185									94.55	-104.363
94.6	-53.1921	-53.7109	-54.5654	-53.7415	-54.9011	-55.1758	-67.8406									94.6	-104.473
94.65	-53.4973	-53.772	-54.6265	-54.1992	-54.9622	-55.1453	-67.9321									94.65	-104.695
94.7	-53.4363	-53.833	-54.3823	-53.8635	-54.5959	-55.3284	-67.5659									94.7	-104.418
94.75	-53.3142	-53.8025	-54.5044	-54.1687	-54.9316	-55.2063	-67.7795									94.75	-104.862
94.8	-53.2227	-53.8025	-54.657	-53.9551	-54.9316	-55.0842	-67.7185									94.8	-104.973
94.85	-53.4363	-53.894	-54.5654	-54.1382	-54.657	-55.3894	-67.749									94.85	-105.25
94.9	-53.3752	-53.772	-54.5349	-54.0771	-54.9927	-55.2673	-67.8101									94.9	-105.472
94.95	-53.3142	-53.772	-54.3518	-53.9856	-54.9011	-55.2368	-67.4744									94.95	-105.139
95	-53.1921	-54.0161	-54.6265	-54.0466	-54.5959	-55.2063	-67.8711									95	-105.139
95.05	-53.3752	-53.772	-54.5654	-53.9551	-54.8706	-55.5115	-67.688									95.05	-105.195
95.1	-53.4058	-53.5278	-54.5349	-54.0771	-54.9316	-55.3284	-67.6269									95.1	-105.084
95.15	-53.3142	-53.894	-54.2908	-53.8635	-54.5959	-55.1758	-67.6575									95.15	-105.195
95.2	-53.2227	-53.833	-54.5044	-54.2297	-54.9011	-55.2368	-67.4438									95.2	-105.084
95.25	-53.4668	-53.6194	-54.5959	-53.8025	-54.9011	-55.3894	-67.749									95.25	-105.472
95.3	-53.4363	-53.772	-54.5959	-54.2297	-54.5349	-55.2978	-67.5964									95.3	-105.417
95.35	-53.4668	-53.7415	-54.4739	-53.9551	-54.9316	-54.9927	-67.2607									95.35	-106.138
95.4	-53.1311	-53.7109	-54.2602	-54.0771	-54.9011	-55.2368	-67.5659									95.4	-105.805
95.45	-53.4058	-53.5889	-54.5654	-54.0771	-54.6875	-55.3589	-67.4744									95.45	-106.194
95.5	-53.4973	-53.8635	-54.718	-53.9551	-54.9316	-55.2063	-67.3218									95.5	-106.582
95.55	-53.4973	-53.8025	-54.5959	-54.0771	-54.9011	-54.9316	-67.5049									95.55	-106.859
95.6	-53.2532	-53.5889	-54.4739	-53.7415	-54.718	-55.1758	-67.3523									95.6	-106.249
95.65	-53.1616	-53.894	-54.3213	-54.1382	-54.9622	-55.2673	-67.3218									95.65	-106.526
95.7	-53.5278	-53.8635	-54.5959	-53.894	-54.9927	-55.2063	-67.4438									95.7	-106.637
95.75	-53.3447	-53.7415	-54.657	-54.0771	-54.8401	-54.9316	-67.2607									95.75	-106.637
95.8	-53.3142	-53.8635	-54.5044	-54.1382	-54.8096	-55.1453	-67.2913									95.8	-107.248
95.85	-53.0395	-53.9246	-54.4128	-53.7109	-55.0232	-55.2978	-67.3523									95.85	-107.303
95.9	-53.2837	-53.8635	-54.2602	-54.1382	-54.9011	-55.2063	-66.9861									95.9	-107.803
95.95	-53.4973	-53.6194	-54.5044	-53.9246	-54.6875	-54.9927	-67.3523									95.95	-107.581
96	-53.3447	-53.9246	-54.5959	-54.0161	-54.9011	-55.1453	-67.3828									96	-107.969
96.05	-53.2532	-53.9246	-54.4434	-54.1382	-54.8706	-55.2368	-67.0471									96.05	-107.747
96.1	-53.1006	-53.5278	-54.4128	-53.894	-54.657	-55.2978	-67.4133									96.1	-107.414
96.15	-53.4973	-53.7109	-54.2602	-54.2297	-54.9316	-55.0232	-67.2607									96.15	-107.414
96.2	-53.4668	-53.772	-54.3518	-54.1077	-54.9316	-55.0232	-66.9556									96.2	-107.747
96.25	-53.4058	-53.7415	-54.5654	-53.9551	-54.6875	-55.3284	-67.3523									96.25	-107.525
96.3	-53.2837	-53.5889	-54.4739	-54.1382	-54.8096	-55.1758	-67.2607									96.3	-107.692
96.35	-53.2532	-53.833	-54.5654	-54.1077	-54.9011	-55.1147	-66.864									96.35	-107.858
96.4	-53.4973	-53.7415	-54.3213	-54.0771	-54.8706	-54.9011	-67.1081									96.4	-108.136
96.45	-53.3752	-53.6499	-54.1992	-54.2297	-54.657	-55.2368	-67.0776									96.45	-108.08
96.5	-53.4668	-53.6194	-54.4739	-53.7415	-55.0232	-55.1453	-66.7419									96.5	-108.635
96.55	-53.3142	-53.833	-54.5959	-54.1992	-54.9622	-55.2063	-67.0776									96.55	-108.579
96.6	-53.2532	-53.6499	-54.5349	-54.1077	-54.5959	-54.9011	-66.9861									96.6	-108.69
96.65	-53.4058	-53.5583	-54.3213	-53.8025	-54.8096	-55.0537	-66.6809									96.65	-108.69
96.7	-53.4058	-53.8635	-54.3823	-54.1382	-54.9011	-55.2978	-66.9556									96.7	-108.579
96.75	-53.4363	-53.7415	-54.4434	-54.1687	-54.8401	-55.1758	-66.9556									96.75	-108.912
96.8	-53.2837	-53.7109	-54.4739	-53.9856	-54.5959	-55.0842	-66.7114									96.8	-109.19
96.85	-53.1921	-53.6499	-54.1382	-54.1687	-54.9011	-55.0232	-66.803									96.85	-109.134
96.9	-53.3752	-53.9246	-54.4739	-53.9856	-54.9927	-55.2673	-66.864									96.9	-109.19
96.95	-53.4668	-53.772	-54.4128	-54.1382	-54.7485	-55.2673	-66.6809									96.95	-109.356
97	-53.4363	-53.6804	-54.1992	-54.1077	-54.718	-55.1758	-66.7725									97	-109.911
97.05	-53.4668	-53.6194	-54.4434	-54.0771	-54.8096	-55.0842	-66.7725									97.05	-109.856
97.1	-53.2837	-53.9551	-54.1992	-54.1687	-54.8096	-55.0537	-66.7419									97.1	-110.078
97.15	-53.2532	-53.8635	-54.3823	-54.2297	-54.4434	-55.2978	-66.6809									97.15	-110.3
97.2	-53.5583	-53.4973	-54.3518	-53.9856	-54.8401	-55.2063	-66.864									97.2	-110.743
97.25	-53.5583	-53.6804	-54.1382	-54.0771	-54.8096	-55.2368	-66.6809									97.25	-111.52
97.3	-53.4058	-53.9246	-54.3213	-54.1687	-54.7485	-55.0842	-66.4673									97.3	-111.798
97.35	-53.2227	-53.8025	-54.0161	-53.9856	-54.5349	-54.9622	-66.7725									97.35	-112.408
97.4	-53.5278	-53.5889	-54.4739	-54.2908	-54.8096	-55.2978	-66.6809									97.4	-112.408
97.45	-53.5889	-53.7415	-54.2602	-54.1077	-54.7485	-55.2368	-66.2537									97.45	-112.963
97.5	-53.4363	-53.9551	-54.4128	-53.8025	-54.657	-55.2368	-66.6504									97.5	-113.462
97.55	-53.3752	-53.8635	-54.3213	-54.1992	-54.657	-55.1147	-66.4978									97.55	-113.185
97.6	-53.6499	-53.6499	-54.4434	-54.1687	-54.9011	-54.9622	-66.4368									97.6	-113.185
97.65	-53.4668	-53.7415	-54.3518	-53.9246	-54.779	-55.1453	-66.4368									97.65	-113.129
97.7	-53.4973	-53.9246	-54.1992	-54.1992	-54.657	-55.2673	-66.5588									97.7	-113.296
97.75	-53.5278	-53.9246	-54.3823	-54.1382	-54.6265	-55.2673	-66.4368									97.75	-112.685
97.8	-53.2532	-53.7109	-54.1077	-53.9246	-54.9011	-55.1147	-66.1316									97.8	-112.242
97.85	-53.5889	-53.6804	-54.4128	-54.1382	-54.7485	-54.9316	-66.4673									97.85	-112.242
97.9	-53.5278	-54.0466	-54.1077	-54.1382	-54.6875	-55.2063	-66.4062									97.9	-111.631
97.95	-53.4668	-53.9246	-54.3823	-54.0466	-54.5654	-55.2368	-66.2842									97.95	-111.631
98	-53.4973	-53.772	-54.1992	-54.1687	-54.8096	-55.1453	-66.3147									98	-111.187
98.05	-53.3752	-53.6194	-54.2297	-54.1687	-54.6875	-54.9622	-66.4368									98.05	-110.91
98.1	-53.5889	-53.9856	-54.3213	-54.0771	-54.5349	-55.2673	-66.3757									98.1	-110.522
98.15	-53.2532	-53.9551	-53.894	-54.1077	-54.4739	-55.2673	-66.1316									98.15	-110.411
98.2	-53.5889	-53.8635	-54.2908	-54.2602	-54.7485	-55.0232	-66.4673									98.2	-109.578
98.25	-53.4363	-53.5583	-54.1992	-54.1687	-54.7485	-55.2673	-66.3452									98.25	-109.578
98.3	-53.6804	-53.8635	-54.1992	-53.9856	-54.5959	-55.2063	-66.1621									98.3	-109.079
98.35	-53.5583	-53.9246	-54.2602	-54.3213	-54.3823	-55.0537	-66.1926									98.35	-108.358
98.4	-53.5278	-53.9551	-53.894	-54.2297	-54.7485	-55.1758	-66.3452									98.4	-108.025
98.45	-53.6499	-53.8025	-54.3823	-53.9551	-54.6875	-54.9927	-66.3757									98.45	-107.581
98.5	-53.5583	-53.6499	-54.2602	-54.1992	-54.6875	-55.2368	-65.979									98.5	-107.303
98.55	-53.5583	-53.9551	-54.1382	-54.2602	-54.3518	-55.1453	-66.2537									98.55	-106.693
98.6	-53.3447	-53.9246	-54.3518	-53.9551	-54.5654	-55.1453	-66.2537									98.6	-106.637
98.65	-53.6499	-53.9246	-54.2297	-54.1382	-54.779	-55.2063	-66.3147									98.65	-106.194
98.7	-53.5278	-53.5889	-54.3213	-54.2908	-54.6265	-54.9011	-65.8569									98.7	-106.582
98.75	-53.6194	-53.9246	-54.2602	-54.0466	-54.6265	-55.2368	-66.1621									98.75	-106.194
98.8	-53.6499	-54.0161	-54.0161	-53.9856	-54.5044	-55.0232	-66.2231									98.8	-105.916
98.85	-53.3142	-54.0466	-54.3518	-54.2602	-54.779	-55.3589	-66.0705									98.85	-105.694
98.9	-53.6499	-53.9246	-54.3213	-54.1382	-54.7485	-55.0842	-65.9485									98.9	-105.916
98.95	-53.4973	-53.7415	-54.0161	-53.9246	-54.718	-55.3284	-66.1926									98.95	-105.639
99	-53.6499	-54.0161	-54.3213	-54.1992	-54.5044	-55.2673	-66.2537									99	-105.639
99.05	-53.6194	-53.9856	-54.2908	-54.2297	-54.5349	-55.3894	-66.04									99.05	-104.862
99.1	-53.4668	-53.9551	-54.1077	-54.0771	-54.7485	-55.2673	-65.8874									99.1	-105.472
99.15	-53.6804	-53.9246	-54.3823	-54.1382	-54.657	-55.1758	-66.0705									99.15	-105.139
99.2	-53.5583	-53.7109	-54.1992	-54.2602	-54.657	-55.3894	-66.1621									99.2	-105.139
99.25	-53.4973	-53.894	-54.1382	-54.2602	-54.4434	-55.0842	-66.0705									99.25	-105.25
99.3	-53.6804	-54.0161	-54.4128	-54.0466	-54.5654	-55.2368	-65.8874									99.3	-104.584
99.35	-53.5278	-53.9246	-54.2297	-54.2297	-54.6875	-54.9927	-66.1316									99.35	-104.196
99.4	-53.7109	-53.894	-54.2602	-54.2602	-54.6265	-55.3589	-66.1621									99.4	-103.863
99.45	-53.7109	-53.6804	-54.3213	-54.1077	-54.657	-55.1453	-66.04									99.45	-103.364
99.5	-53.5278	-53.833	-54.2297	-54.0771	-54.4128	-55.2368	-65.7654									99.5	-103.086
99.55	-53.8635	-53.9856	-54.2908	-54.3213	-54.5044	-55.3284	-66.0095									99.55	-102.809
99.6	-53.6194	-53.9551	-54.3518	-54.1992	-54.718	-54.9927	-66.0095									99.6	-102.476
99.65	-53.4973	-53.9246	-54.1992	-53.9856	-54.7485	-55.3284	-65.9485									99.65	-102.31
99.7	-53.6804	-53.7415	-54.2908	-54.1382	-54.657	-55.1147	-65.7349									99.7	-101.477
99.75	-53.6194	-53.7109	-54.4434	-54.2297	-54.5044	-55.3284	-65.8569									99.75	-101.866
99.8	-53.4973	-54.0771	-54.1077	-54.1077	-54.5044	-55.2978	-66.0095									99.8	-101.644
99.85	-53.6804	-54.0161	-54.1687	-53.894	-54.779	-55.1147	-65.9485									99.85	-101.921
99.9	-53.5278	-53.9856	-54.2908	-54.2297	-54.779	-55.4199	-65.8264									99.9	-101.533
99.95	-53.5278	-53.833	-54.1992	-54.2297	-54.6875	-55.2673	-65.7654									99.95	-101.255
[truncated: 8,322 more rows]

## Sheet: Fig. 1 supl 5b
Po	mean	sem
0	0.00223482	0.00319892
0.25	0.00699725	0.00388981
0.5	0.013647	0.00524399
0.75	0.112186	0.0410943
1	0.156067	0.0289822
1.25	0.250078	0.00956818
1.5	0.502416	0.0192405
2	0.673426	0.0753926
2.5	0.809723	0.107849
3	0.869485	0.0748481
3.5	0.961697	0.0281789
4	0.997059	0.00588235

## Sheet: Fig. 1supl 5c
	13516020
0	-1.40824	-0.751812	-1.09672	-0.80426	1.72139	2.36987	-0.899632	-1.12376
0.05	-0.797894	-3.49839	0.734333	0.721619	1.41621	-2.20776	-1.50998	0.707294
0.1	3.16939	-1.97252	1.95504	-1.41461	-0.72002	-2.51294	0.321072	3.75905
0.15	0.42281	1.07924	-1.4019	-3.55084	-1.94072	1.14917	0.626247	1.928
0.2	-1.71342	-0.14146	-1.4019	-1.41461	-1.33037	-2.51294	-2.73069	-1.42894
0.25	1.03316	-3.49839	0.734333	-0.193909	-0.72002	-0.987061	-2.42551	-0.513409
0.3	2.55904	-1.66734	2.26021	2.2475	0.500683	2.98022	2.15213	2.53835
0.35	-0.492718	1.99477	-0.48637	2.85785	1.72139	-0.987061	-1.50998	3.45388
0.4	-0.797894	1.07924	0.123981	-0.80426	-0.72002	1.45435	-2.12033	1.62282
0.45	2.55904	-2.27769	1.03951	-1.10944	-2.2459	3.2854	1.54177	-0.818584
0.5	4.69527	-0.14146	3.48091	-0.193909	-2.2459	0.233643	-0.594456	1.31765
0.55	-1.71342	1.99477	-0.181194	0.416443	-1.63555	5.11646	-2.42551	1.31765
0.6	-0.187542	2.60512	-1.09672	1.63715	-0.414845	-0.376709	-1.50998	4.67458
0.65	1.33834	-1.97252	0.734333	1.33197	0.805859	1.75952	0.321072	3.1487
0.7	1.94869	-0.751812	3.17574	-1.41461	0.805859	1.45435	-3.34104	0.096943
0.75	-2.93412	1.68959	0.734333	-2.94049	-1.33037	0.233643	-2.12033	-0.208233
0.8	-1.71342	2.9103	-1.70707	-2.02496	-2.85625	4.81128	1.2366	-0.208233
0.85	0.117634	-0.751812	-0.791546	-1.41461	-2.2459	-0.071533	-0.28928	2.23317
0.9	1.64351	-1.36216	3.17574	0.721619	-0.72002	2.36987	-1.50998	2.84353
0.95	-2.32377	0.774067	1.34468	0.416443	0.500683	1.14917	1.2366	-2.03929
1	-1.40824	1.68959	-2.31743	-1.41461	2.33174	0.538818	2.4573	-2.64964
1.05	0.117634	-0.14146	-2.31743	-2.63531	-0.109669	4.20093	-1.81516	-0.818584
1.1	1.33834	-2.27769	0.123981	-2.63531	-1.94072	-0.681885	-0.594456	1.62282
1.15	-2.0186	-1.97252	2.56539	-2.02496	-1.94072	2.67505	1.54177	2.84353
1.2	-1.71342	-0.446636	-0.48637	-0.80426	-1.33037	0.233643	0.626247	1.62282
1.25	-0.797894	0.468891	-1.70707	0.111267	1.41621	0.233643	-3.64621	-1.12376
1.3	1.33834	-2.58287	-0.791546	0.416443	0.195507	4.5061	-2.12033	-0.208233
1.35	-1.40824	-1.97252	0.734333	-1.71979	-2.2459	-1.29224	2.15213	-0.208233
1.4	-2.32377	-1.97252	2.26021	-4.46637	-1.0252	1.14917	-0.899632	1.62282
1.45	-2.0186	0.774067	-1.70707	-2.63531	2.63691	2.67505	-2.12033	2.84353
1.5	0.117634	-0.14146	-2.01225	-1.41461	-1.63555	-0.071533	-0.899632	0.402119
1.55	-0.187542	-2.27769	-0.48637	-0.193909	-1.0252	2.36987	1.84695	-1.42894
1.6	-2.0186	-1.97252	1.64986	1.33197	1.41621	-0.376709	-1.20481	-2.34446
1.65	-1.40824	-1.05699	1.34468	1.33197	0.195507	-1.29224	-1.81516	-1.42894
1.7	-0.492718	1.07924	-2.01225	1.02679	-1.63555	2.36987	-0.594456	-0.208233
1.75	2.55904	-1.36216	-1.4019	-0.193909	2.33174	-1.29224	2.15213	2.23317
1.8	-0.492718	-3.19322	-0.791546	-2.94049	-0.109669	-1.90259	-0.594456	1.928
1.85	-2.32377	-2.88804	0.123981	-2.63531	-1.0252	3.2854	-1.81516	-1.42894
1.9	-0.492718	-0.446636	2.56539	-2.02496	3.55244	-0.681885	1.2366	-2.64964
1.95	0.727985	1.68959	-2.01225	0.111267	-1.0252	-2.20776	3.06765	-2.64964
2	1.64351	1.07924	-2.01225	0.416443	1.41621	3.2854	-0.899632	-2.03929
2.05	-0.797894	-1.36216	-2.01225	2.85785	-0.109669	-1.29224	-1.81516	-1.12376
2.1	-2.0186	0.163715	0.734333	1.02679	-1.33037	-1.90259	-0.28928	2.53835
2.15	-1.10307	1.38442	3.17574	-0.80426	2.94209	1.75952	2.15213	1.01247
2.2	1.94869	3.52065	0.429157	-2.33014	-2.2459	-1.59741	-1.50998	-1.73411
2.25	2.86422	1.99477	-2.6226	-1.71979	0.195507	-1.90259	-3.34104	-1.73411
2.3	-1.10307	-1.66734	-2.01225	-0.193909	-1.63555	2.36987	-1.20481	-0.818584
2.35	-2.32377	-0.446636	0.123981	-0.499084	-1.63555	-0.681885	2.15213	-0.208233
2.4	-1.10307	0.468891	1.34468	1.02679	2.94209	-2.81812	-1.20481	1.01247
2.45	1.64351	1.07924	0.429157	0.721619	-3.16143	0.843994	-3.03586	2.53835
2.5	2.55904	1.38442	-3.23295	3.4682	-0.109669	0.233643	-1.50998	1.62282
2.55	-1.40824	-0.751812	-1.70707	1.63715	-1.33037	-2.51294	1.54177	0.402119
2.6	-2.32377	-1.05699	-0.48637	-1.10944	-2.2459	-0.071533	1.54177	-2.03929
2.65	-1.40824	-0.14146	1.34468	-2.94049	1.41621	2.67505	-2.12033	-2.34446
2.7	1.03316	0.468891	3.48091	-2.33014	-2.85625	-0.987061	-1.81516	-1.42894
2.75	2.25386	2.9103	2.56539	-1.71979	0.500683	-0.071533	-0.594456	-1.42894
2.8	0.117634	3.21547	-0.181194	-0.80426	-0.414845	4.81128	3.06765	0.707294
2.85	-1.40824	0.774067	0.734333	-0.193909	-1.0252	-0.071533	-0.594456	1.31765
2.9	-0.187542	-0.751812	0.429157	0.111267	3.85762	0.843994	-1.50998	2.23317
2.95	0.117634	-0.14146	1.34468	1.94232	-1.33037	3.89575	-1.20481	1.31765
3	2.86422	1.07924	3.17574	3.16303	0.195507	2.36987	1.84695	-0.818584
3.05	3.77974	2.9103	3.17574	2.2475	4.16279	-0.071533	2.15213	-2.64964
3.1	1.03316	2.9103	-0.181194	1.63715	-1.63555	1.75952	-1.20481	-1.42894
3.15	0.727985	1.07924	-1.70707	-1.10944	0.500683	3.59058	-1.20481	-0.513409
3.2	0.117634	-1.36216	-0.791546	-1.10944	2.94209	-2.20776	0.931423	-0.513409
3.25	0.117634	-0.446636	-1.09672	-1.41461	-1.94072	-0.987061	3.67801	0.402119
3.3	3.47457	-0.751812	0.123981	-0.499084	-0.109669	2.98022	2.76248	0.402119
3.35	2.55904	1.07924	1.03951	0.721619	1.72139	-0.376709	-0.594456	2.23317
3.4	-1.10307	3.21547	1.03951	2.55267	-1.94072	-2.51294	0.015896	0.707294
3.45	-2.32377	0.774067	-1.09672	-1.10944	-0.414845	-0.376709	0.626247	-1.12376
3.5	-1.71342	-2.58287	-2.01225	-2.63531	1.72139	2.0647	2.15213	-3.25999
3.55	-0.797894	-3.49839	-1.4019	-1.10944	-2.55107	-2.20776	0.931423	-2.34446
3.6	0.42281	-1.66734	-1.09672	1.02679	-1.0252	-1.29224	-2.12033	-2.64964
3.65	1.33834	-0.751812	1.64986	-1.10944	2.94209	0.843994	-1.81516	-2.95481
3.7	-0.187542	0.774067	2.87056	-3.85602	-2.55107	0.843994	-1.50998	-2.34446
3.75	-3.2393	1.99477	1.34468	-1.41461	-1.94072	-1.90259	1.84695	-0.513409
3.8	-2.32377	0.468891	-0.48637	1.63715	2.94209	-0.681885	1.54177	0.096943
3.85	-3.54448	-1.05699	-2.01225	-3.24567	-1.33037	2.36987	-1.20481	0.096943
3.9	-0.492718	-1.36216	-2.01225	-3.24567	-1.0252	-0.376709	-1.81516	-1.73411
3.95	1.94869	-1.05699	-0.791546	2.2475	2.33174	-0.681885	-1.81516	-3.56517
4	0.727985	-0.751812	-0.181194	-1.41461	-1.33037	0.538818	0.321072	-2.64964
4.05	-1.40824	0.468891	1.03951	-0.80426	-1.0252	2.67505	1.84695	-1.12376
4.1	-2.62895	3.21547	3.17574	2.55267	0.500683	-1.90259	-1.50998	1.62282
4.15	-1.40824	1.38442	1.03951	-1.41461	1.41621	-0.987061	-3.34104	-1.73411
4.2	-1.10307	-1.97252	0.429157	-1.10944	-1.63555	1.14917	-1.81516	-2.64964
4.25	0.727985	-0.751812	-2.31743	2.85785	0.805859	3.89575	-0.28928	-1.42894
4.3	2.55904	0.774067	-1.4019	-1.41461	3.55244	-0.376709	1.54177	1.928
4.35	3.77974	3.21547	-2.01225	1.63715	-1.33037	0.843994	2.15213	-1.42894
4.4	1.33834	-0.751812	-0.791546	2.2475	-0.72002	3.89575	-0.899632	-1.73411
4.45	-0.187542	-0.14146	0.734333	0.416443	2.94209	3.89575	-1.50998	1.928
4.5	0.117634	0.774067	1.95504	3.16303	0.500683	1.45435	-1.20481	0.096943
4.55	0.42281	2.29995	0.429157	0.416443	-1.33037	1.75952	0.015896	-2.03929
4.6	2.86422	-1.66734	-1.70707	0.416443	0.500683	3.89575	0.626247	1.01247
4.65	2.55904	0.163715	-2.6226	3.4682	1.72139	3.2854	0.931423	1.01247
4.7	-1.10307	3.52065	-2.31743	-1.41461	-2.55107	-0.681885	-0.594456	-2.34446
4.75	-0.492718	-1.66734	0.123981	-1.10944	-2.2459	0.233643	-3.03586	0.402119
4.8	0.727985	-0.751812	0.123981	3.16303	1.41621	1.14917	-2.42551	0.707294
4.85	1.94869	2.9103	-2.6226	-2.02496	-0.72002	1.75952	-1.81516	-1.73411
4.9	-2.0186	-1.97252	-2.01225	-0.80426	-1.94072	-3.73364	1.2366	1.62282
4.95	-1.71342	0.468891	0.734333	2.55267	-1.0252	-2.81812	2.15213	-1.42894
5	2.25386	0.468891	0.123981	-1.41461	1.41621	-2.51294	0.321072	-1.12376
5.05	-0.492718	-1.66734	-1.70707	-1.71979	-2.2459	0.233643	-1.50998	3.1487
5.1	-1.10307	3.52065	1.03951	2.55267	-1.33037	-3.12329	-2.12033	-2.03929
5.15	2.55904	-1.66734	2.56539	-1.10944	1.11103	-3.12329	-1.81516	1.01247
5.2	-0.797894	1.07924	-1.70707	-1.41461	0.805859	-1.29224	-1.20481	2.23317
5.25	-1.71342	1.38442	-0.791546	1.63715	-1.63555	0.843994	1.84695	-0.818584
5.3	3.16939	-0.751812	1.64986	0.416443	-0.414845	1.45435	2.15213	2.53835
5.35	-1.40824	3.52065	-1.70707	-1.71979	3.24727	-3.12329	0.626247	0.402119
5.4	0.117634	-1.36216	-0.48637	-0.499084	0.195507	-2.20776	-2.42551	0.096943
5.45	2.55904	0.774067	-0.791546	3.4682	-1.0252	-0.987061	-2.42551	3.1487
5.5	-1.10307	-0.14146	-2.6226	-1.10944	0.195507	0.233643	-0.594456	0.707294
5.55	2.55904	-1.05699	1.95504	-1.10944	2.94209	-3.73364	-0.28928	-0.513409
5.6	-0.187542	2.60512	-3.23295	1.94232	-1.94072	-5.5647	0.015896	3.1487
5.65	-0.187542	-1.66734	-1.09672	1.63715	-1.94072	-4.34399	2.15213	-0.208233
5.7	2.55904	-0.751812	0.734333	-0.193909	-0.72002	-4.34399	2.76248	-0.513409
5.75	-1.40824	1.99477	-2.6226	-0.499084	2.33174	-2.51294	0.931423	1.31765
5.8	3.47457	-2.27769	0.734333	3.4682	-1.33037	-5.86987	-0.899632	0.707294
5.85	-0.492718	1.68959	-1.70707	-0.193909	-1.33037	-5.5647	-1.20481	-1.12376
5.9	0.117634	0.774067	-0.791546	-1.10944	0.500683	-5.25952	0.321072	0.402119
5.95	1.94869	-0.446636	2.26021	-0.80426	2.94209	-2.81812	1.84695	1.62282
6	-1.40824	4.43618	-2.01225	2.2475	-1.0252	-1.29224	4.28836	-2.95481
6.05	2.55904	-1.36216	0.429157	-1.41461	-1.63555	-4.64917	2.4573	-1.42894
6.1	-2.32377	-0.14146	0.123981	-1.41461	1.11103	-5.86987	-0.28928	2.53835
6.15	-1.40824	3.82583	-1.09672	0.111267	3.85762	-4.34399	0.626247	-0.818584
6.2	2.55904	-0.751812	2.26021	1.94232	-0.414845	-0.987061	0.931423	-2.34446
6.25	-2.93412	0.163715	-1.70707	-2.02496	-2.2459	0.233643	3.06765	0.707294
6.3	-0.797894	3.52065	-1.4019	-1.71979	-0.109669	-3.42847	-0.899632	2.23317
6.35	-0.492718	-1.05699	2.87056	0.111267	3.55244	-4.03882	-2.12033	-1.73411
6.4	-2.0186	-0.446636	-1.09672	1.33197	1.41621	-1.90259	0.626247	-1.42894
6.45	0.727985	2.29995	-0.181194	-2.33014	-0.72002	0.538818	-0.28928	2.53835
6.5	-1.40824	-1.97252	2.87056	-1.10944	-0.109669	2.67505	-1.50998	0.096943
6.55	-1.71342	-1.05699	-0.791546	0.111267	2.63691	-0.376709	1.54177	-1.12376
6.6	1.94869	2.29995	-0.791546	2.85785	3.85762	-2.51294	1.2366	0.096943
6.65	0.117634	-1.05699	3.48091	-1.10944	-0.109669	-1.59741	-1.20481	2.53835
6.7	-1.40824	-2.27769	-0.791546	-0.193909	-0.414845	-0.987061	1.84695	-0.208233
6.75	3.16939	1.07924	-0.48637	1.33197	1.41621	0.233643	0.931423	0.402119
6.8	-0.492718	1.68959	3.17574	3.16303	5.68867	-0.376709	-0.28928	1.928
6.85	-0.492718	-1.97252	-0.791546	0.111267	1.41621	-2.81812	3.37283	4.06423
6.9	1.94869	0.163715	-1.09672	-1.10944	0.500683	-3.12329	-1.50998	0.096943
6.95	1.03316	2.29995	1.34468	0.416443	0.195507	-2.81812	0.015896	1.01247
7	-1.10307	-2.58287	1.64986	2.55267	3.24727	-0.376709	2.4573	0.402119
7.05	1.03316	-2.27769	-2.92778	1.33197	3.55244	1.75952	-0.899632	1.62282
7.1	2.55904	1.99477	-1.4019	-1.71979	1.11103	1.45435	2.15213	-2.03929
7.15	-0.797894	-2.27769	3.17574	-0.80426	-0.72002	-1.90259	-0.899632	-2.03929
7.2	0.727985	-2.58287	-2.01225	0.416443	0.195507	-3.12329	-0.594456	-1.12376
7.25	3.16939	-0.446636	-0.791546	2.55267	1.11103	-0.071533	2.4573	1.01247
7.3	-0.492718	-1.05699	2.56539	-1.10944	1.72139	0.233643	-1.50998	-1.73411
7.35	-1.40824	-1.66734	0.734333	-2.33014	-0.414845	1.14917	1.84695	-1.12376
7.4	3.16939	-0.751812	-1.4019	-0.80426	-1.0252	0.843994	-0.899632	1.01247
7.45	-1.10307	1.99477	0.123981	1.33197	-1.33037	-0.681885	-1.20481	2.84353
7.5	-2.0186	-3.19322	1.95504	1.02679	1.11103	-1.90259	3.67801	-0.208233
7.55	0.42281	-2.27769	-2.01225	-2.63531	2.02656	-1.59741	-0.28928	0.402119
7.6	-0.187542	0.468891	-2.31743	-2.63531	-1.0252	-1.59741	1.84695	1.31765
7.65	-2.93412	-0.751812	0.123981	-1.41461	-0.72002	0.233643	2.15213	4.3694
7.7	-1.40824	-4.10875	-0.48637	1.63715	-0.72002	1.75952	-1.20481	0.707294
7.75	1.64351	-2.88804	-3.53813	-1.10944	2.02656	0.538818	1.84695	-1.42894
7.8	-2.0186	1.99477	-1.4019	-2.33014	3.55244	-1.90259	0.931423	1.01247
7.85	-1.40824	-2.88804	1.95504	-1.71979	0.805859	-2.51294	-0.899632	3.1487
7.9	2.55904	-2.58287	-1.4019	0.416443	-1.94072	-0.681885	2.15213	1.928
7.95	-0.492718	-0.751812	-1.70707	4.38373	-1.33037	1.14917	0.015896	-0.818584
8	-2.62895	1.68959	0.734333	1.94232	0.805859	3.59058	-0.899632	0.096943
8.05	-0.492718	-1.36216	4.09127	-0.499084	3.24727	-0.376709	2.15213	1.01247
8.1	2.25386	-1.36216	-1.09672	0.111267	1.72139	-0.681885	0.626247	3.45388
8.15	-1.40824	1.68959	-0.48637	1.63715	-1.0252	0.843994	-1.81516	-0.513409
8.2	-1.10307	1.68959	1.64986	4.99408	-1.0252	3.89575	0.931423	-1.73411
8.25	2.25386	-1.36216	3.17574	1.94232	0.195507	-0.376709	1.54177	-2.34446
8.3	1.94869	-1.05699	-1.70707	-0.80426	-0.109669	-1.29224	-0.899632	0.096943
8.35	-1.40824	2.9103	-0.48637	0.111267	2.63691	1.45435	1.2366	0.402119
8.4	-0.797894	1.07924	1.64986	1.02679	0.805859	0.538818	3.06765	-3.56517
8.45	2.86422	-1.66734	1.64986	2.55267	-1.0252	-2.20776	0.015896	-3.87034
8.5	-0.187542	-0.446636	-2.31743	2.55267	-2.85625	-0.681885	0.015896	-3.25999
8.55	-2.32377	3.21547	-1.70707	0.111267	-1.94072	0.538818	3.37283	0.707294
8.6	-1.10307	1.68959	1.64986	-1.10944	0.195507	-2.81812	-0.594456	-0.208233
8.65	1.64351	-1.66734	1.95504	-1.10944	2.02656	0.538818	-0.28928	-2.03929
8.7	-2.0186	-0.751812	-2.01225	0.111267	0.195507	-0.681885	3.37283	-1.73411
8.75	-1.71342	1.68959	-1.09672	3.4682	-3.4666	-0.987061	1.2366	-0.513409
8.8	0.117634	-0.14146	2.26021	1.63715	-2.2459	2.98022	-0.899632	2.53835
8.85	1.94869	-1.97252	3.48091	-1.10944	-2.85625	-1.59741	0.931423	1.01247
8.9	-1.10307	-1.36216	-0.48637	-1.71979	-1.33037	2.67505	1.84695	-2.03929
8.95	-1.40824	1.07924	0.123981	0.111267	-0.72002	2.36987	-2.73069	-2.95481
9	0.42281	1.68959	1.34468	1.94232	0.805859	0.843994	-1.20481	-1.12376
9.05	0.727985	-0.751812	3.78609	4.07855	-1.33037	5.11646	1.84695	1.01247
9.1	-2.32377	-0.446636	-0.48637	2.85785	-2.85625	-0.376709	-0.899632	1.928
9.15	-1.71342	2.60512	-1.70707	0.111267	-3.16143	3.59058	-2.12033	-1.42894
9.2	-0.492718	2.9103	-0.181194	-0.499084	-1.63555	0.843994	0.015896	-2.34446
9.25	1.33834	0.163715	2.87056	-0.193909	-0.414845	0.538818	3.06765	0.096943
9.3	-2.62895	0.468891	0.429157	0.416443	2.94209	4.5061	-1.81516	0.096943
9.35	-1.71342	1.07924	-2.31743	2.55267	1.72139	1.14917	-0.594456	3.1487
9.4	-0.187542	3.52065	-1.4019	2.2475	-0.109669	4.81128	1.2366	0.707294
9.45	2.86422	-0.751812	1.03951	-0.193909	-1.94072	1.14917	0.626247	-1.73411
9.5	-0.187542	-1.05699	2.26021	-1.71979	-1.0252	1.45435	-2.12033	-2.03929
9.55	-0.797894	-1.05699	-1.70707	-1.10944	0.195507	3.89575	-1.50998	-1.12376
9.6	1.64351	1.38442	-1.70707	-0.499084	2.02656	0.233643	2.15213	1.01247
9.65	3.77974	2.29995	0.429157	0.416443	-1.94072	2.67505	-1.20481	1.01247
9.7	1.33834	-0.751812	2.26021	0.416443	-1.63555	0.233643	-2.12033	-0.818584
9.75	-0.492718	-1.97252	0.429157	1.02679	-0.414845	1.45435	-0.899632	-3.56517
9.8	0.727985	-0.14146	-1.4019	-1.41461	1.41621	4.81128	2.15213	-0.818584
9.85	1.94869	3.21547	0.429157	-2.94049	-1.94072	-0.681885	-0.28928	-1.42894
9.9	3.77974	-0.14146	2.26021	-3.24567	-1.33037	0.233643	-1.50998	1.01247
9.95	-0.797894	-2.58287	4.09127	-1.71979	2.02656	4.5061	0.931423	2.23317
10	-0.492718	-2.58287	2.26021	-0.499084	-3.16143	0.538818	3.06765	0.402119
10.05	1.03316	-0.446636	0.734333	0.416443	-2.2459	1.14917	-0.28928	-1.42894
10.1	3.47457	2.29995	1.95504	1.02679	2.63691	3.59058	-0.28928	-1.12376
10.15	2.55904	-1.66734	2.87056	-0.499084	-3.4666	-0.987061	1.2366	-1.12376
10.2	-1.10307	-3.19322	5.00679	-1.41461	-1.94072	0.843994	2.76248	0.707294
10.25	-0.187542	-1.97252	2.87056	-2.02496	-0.109669	3.2854	0.321072	2.84353
10.3	1.03316	-0.446636	0.734333	-2.33014	-2.85625	-0.681885	0.015896	2.53835
10.35	3.47457	2.29995	1.34468	-2.63531	1.11103	0.843994	0.321072	-0.513409
10.4	-0.187542	-0.14146	1.95504	-0.80426	-1.94072	3.89575	3.98318	-1.73411
10.45	-0.797894	-2.88804	3.78609	0.416443	-1.94072	0.538818	-0.899632	-0.208233
10.5	-0.797894	-1.05699	2.26021	3.16303	1.11103	1.75952	0.321072	-0.208233
10.55	1.64351	1.07924	0.123981	1.94232	-1.33037	5.72681	0.931423	0.402119
10.6	3.16939	1.99477	-1.09672	-0.193909	2.33174	0.538818	5.20388	2.23317
10.65	-1.10307	1.68959	0.734333	-0.80426	-1.33037	1.75952	1.84695	1.928
10.7	-1.10307	-1.36216	2.26021	-0.193909	-0.414845	4.5061	0.321072	-0.208233
10.75	-1.40824	-0.446636	3.78609	-0.193909	0.500683	1.75952	2.4573	-2.95481
10.8	1.94869	0.468891	-0.181194	0.111267	-2.2459	2.0647	4.59353	-2.34446
10.85	3.47457	1.99477	-1.70707	0.111267	3.55244	4.5061	2.76248	-1.42894
10.9	-0.187542	3.21547	-0.791546	1.02679	-1.94072	2.0647	-0.594456	-0.818584
10.95	-1.10307	0.468891	-0.181194	1.33197	1.41621	0.233643	-0.28928	-0.818584
11	0.117634	-1.66734	1.64986	2.85785	0.500683	2.0647	0.626247	0.402119
11.05	2.86422	-0.751812	1.03951	1.33197	-1.63555	2.98022	2.4573	0.707294
11.1	4.39009	-0.446636	-0.791546	-0.80426	3.55244	-1.90259	-0.899632	-0.513409
11.15	1.64351	2.29995	-2.31743	-1.71979	-1.94072	-0.681885	-2.42551	-2.64964
11.2	-1.71342	1.68959	-1.70707	-2.63531	-1.63555	4.5061	-1.50998	-2.34446
11.25	-0.492718	-2.27769	-0.48637	-0.80426	0.500683	-0.376709	1.54177	-1.12376
11.3	-0.492718	-2.58287	3.17574	-1.71979	-2.55107	-0.376709	2.4573	-1.12376
11.35	2.25386	-2.27769	2.56539	-1.71979	-1.33037	2.98022	-2.12033	1.01247
11.4	2.25386	-1.36216	-1.09672	-0.80426	-0.109669	1.14917	-1.20481	1.62282
11.45	-0.797894	0.774067	-2.6226	0.721619	-4.07695	-0.681885	0.321072	2.23317
11.5	-2.0186	1.07924	-1.4019	1.94232	-0.72002	0.538818	3.06765	0.096943
11.55	-1.40824	-1.66734	-0.48637	0.416443	-0.109669	2.98022	0.626247	-1.12376
11.6	1.03316	-2.27769	0.734333	-1.71979	-2.55107	-0.987061	-2.42551	-2.95481
11.65	2.86422	-1.97252	3.78609	-2.94049	0.195507	-0.376709	-1.81516	-2.34446
11.7	1.94869	-1.36216	1.03951	-0.499084	0.500683	2.98022	0.015896	-2.34446
11.75	-1.71342	1.07924	-1.4019	1.33197	-1.94072	1.75952	2.76248	-1.12376
11.8	-1.40824	1.99477	-0.48637	3.16303	1.72139	-0.071533	0.321072	-0.208233
11.85	-0.187542	1.07924	0.123981	-0.193909	1.11103	2.0647	-1.50998	1.62282
11.9	1.03316	-0.446636	1.34468	-1.41461	-2.2459	3.89575	-0.594456	2.53835
11.95	2.86422	-1.36216	2.26021	0.721619	-0.414845	-0.681885	1.54177	4.06423
12	2.55904	-0.446636	4.09127	1.63715	1.72139	0.538818	3.06765	1.01247
12.05	0.727985	-1.05699	1.64986	-0.80426	-3.16143	2.36987	1.84695	-0.513409
12.1	-0.492718	0.774067	-0.48637	-1.71979	-1.33037	2.0647	-1.81516	-0.513409
12.15	0.727985	1.99477	-1.70707	1.63715	2.33174	-1.90259	-0.28928	-2.03929
12.2	-0.187542	0.774067	-0.181194	-0.193909	-2.2459	-0.071533	0.015896	-2.03929
12.25	2.55904	-2.27769	-1.70707	-2.02496	-1.63555	3.2854	0.626247	0.402119
12.3	3.16939	-3.19322	0.123981	0.416443	2.33174	1.14917	2.15213	2.53835
12.35	2.55904	-1.66734	2.87056	1.02679	-0.109669	-1.90259	-1.50998	0.402119
12.4	-0.187542	-1.36216	2.87056	-2.33014	-1.33037	-0.376709	-2.42551	-2.03929
12.45	-0.492718	-0.14146	0.734333	0.111267	1.11103	3.2854	-2.73069	-1.42894
12.5	-0.187542	1.07924	-1.70707	1.02679	0.195507	0.538818	-1.20481	1.62282
12.55	-0.187542	-0.446636	-1.70707	-2.02496	-1.0252	-1.59741	2.4573	2.53835
12.6	1.03316	-2.27769	-0.181194	1.02679	1.11103	-0.071533	0.626247	-1.12376
12.65	4.08492	-1.36216	-0.48637	-2.94049	2.63691	3.2854	-3.03586	-0.208233
12.7	2.25386	1.07924	0.429157	-3.24567	-1.63555	0.538818	-3.03586	1.31765
12.75	0.117634	1.38442	1.03951	1.02679	-0.414845	-0.071533	-1.50998	1.62282
12.8	-1.10307	-1.97252	1.95504	-3.24567	3.24727	0.843994	0.321072	-1.42894
12.85	-0.492718	-1.66734	0.123981	-2.63531	-0.414845	3.59058	2.15213	0.707294
12.9	1.33834	1.99477	-1.09672	1.02679	-1.0252	0.538818	0.931423	1.01247
12.95	3.47457	-2.27769	-1.70707	-3.85602	0.195507	0.233643	-0.899632	-2.03929
13	1.03316	-1.66734	0.123981	-0.499084	2.33174	-0.071533	-0.899632	1.01247
13.05	0.117634	2.60512	2.87056	0.111267	-2.2459	2.98022	-0.899632	0.402119
13.1	0.727985	-1.66734	3.17574	-2.33014	-1.0252	-0.376709	-0.28928	-2.95481
13.15	1.94869	-2.58287	-1.09672	0.721619	2.33174	-1.90259	2.4573	0.402119
13.2	1.33834	3.21547	-1.09672	0.111267	-0.414845	-2.51294	4.28836	-1.12376
13.25	-1.71342	-1.66734	1.34468	-2.33014	-1.0252	-0.071533	1.54177	-3.25999
13.3	0.117634	-0.751812	1.34468	-0.193909	0.500683	-0.376709	0.321072	2.53835
13.35	4.08492	1.38442	-2.01225	1.33197	3.55244	-3.73364	0.321072	-2.34446
13.4	-1.10307	-1.36216	-1.70707	-1.71979	-0.72002	-2.81812	0.931423	-1.12376
13.45	-1.10307	2.60512	2.56539	-0.499084	-0.72002	-0.071533	2.76248	0.707294
13.5	3.77974	-2.58287	-3.23295	3.16303	0.805859	2.67505	3.37283	-2.95481
13.55	0.42281	-1.36216	-2.92778	-2.33014	2.02656	-0.987061	2.4573	-0.513409
13.6	1.03316	0.163715	2.56539	-1.71979	-1.63555	-0.376709	-0.28928	-0.208233
13.65	5.00045	-1.97252	-3.23295	0.721619	-0.109669	1.45435	-1.20481	-3.56517
13.7	-0.187542	1.99477	-1.70707	-1.10944	2.02656	4.5061	-2.42551	-0.513409
13.75	2.86422	-2.27769	0.734333	-2.33014	-0.72002	2.67505	-1.50998	-1.73411
13.8	-0.187542	-0.751812	-2.01225	-0.193909	-1.33037	-0.376709	0.015896	-3.25999
13.85	-0.492718	0.774067	0.734333	1.63715	-1.33037	1.14917	1.54177	0.402119
13.9	3.77974	-2.27769	-0.791546	-3.24567	2.33174	3.59058	2.4573	-2.03929
13.95	-1.40824	1.38442	-2.31743	-0.80426	-1.63555	4.81128	0.931423	-2.95481
14	0.727985	-1.97252	1.95504	2.55267	-2.85625	0.233643	0.321072	0.707294
14.05	-0.797894	-0.751812	-2.31743	0.111267	-1.33037	-0.071533	-0.594456	-0.818584
14.1	-0.797894	1.68959	-1.4019	-2.94049	1.41621	-0.681885	-0.899632	-2.64964
14.15	2.86422	-2.58287	1.03951	0.111267	-1.33037	2.36987	-1.50998	-0.513409
14.2	-1.40824	0.468891	-2.6226	3.4682	-3.16143	2.36987	0.626247	0.096943
14.25	0.727985	-0.14146	1.64986	-0.80426	-1.94072	-0.681885	2.4573	-1.73411
14.3	0.117634	-1.36216	-1.09672	-2.63531	2.02656	-0.987061	0.931423	-1.12376
14.35	-1.40824	2.29995	-0.48637	0.416443	-1.33037	0.538818	-1.81516	1.928
14.4	2.25386	-1.36216	2.87056	2.2475	-3.77178	3.59058	-2.42551	-2.34446
14.45	-2.0186	-1.05699	-0.791546	-1.71979	-2.2459	4.20093	-0.899632	-1.73411
14.5	0.727985	2.60512	2.26021	-2.02496	0.500683	1.45435	3.06765	1.62282
14.55	0.42281	-1.36216	2.56539	0.416443	-0.72002	0.233643	2.15213	0.096943
14.6	-1.10307	-2.27769	-0.48637	4.07855	-3.16143	1.45435	-1.50998	-1.73411
14.65	2.55904	0.468891	1.95504	-0.193909	-2.55107	2.67505	0.015896	0.402119
14.7	-1.40824	-1.05699	1.34468	-0.80426	0.195507	5.11646	3.06765	3.1487
14.75	-0.797894	-2.27769	-1.70707	0.721619	0.500683	2.67505	-0.594456	-1.12376
14.8	4.08492	0.468891	1.64986	4.07855	-1.63555	0.843994	-1.81516	0.096943
14.85	0.117634	-0.751812	1.64986	-0.193909	-1.94072	1.45435	1.2366	2.23317
14.9	-0.187542	-2.58287	-1.09672	-1.41461	0.500683	2.0647	-0.28928	3.45388
14.95	3.77974	-0.14146	1.03951	0.416443	1.72139	5.42163	-3.64621	-1.12376
15	-0.187542	-0.14146	1.64986	3.77338	-1.0252	4.20093	-0.28928	0.402119
15.05	-1.10307	-1.36216	-1.09672	1.02679	-2.85625	0.233643	-2.42551	3.1487
15.1	3.16939	-0.751812	0.734333	-2.33014	-3.4666	0.233643	-3.34104	0.707294
15.15	-0.492718	1.99477	3.17574	-0.499084	-1.33037	1.45435	1.2366	-2.34446
15.2	0.117634	-2.58287	-0.48637	2.85785	-1.0252	2.98022	-3.64621	-0.208233
15.25	3.16939	-0.446636	1.34468	1.02679	-4.07695	2.98022	-1.20481	3.1487
15.3	-1.71342	3.52065	5.00679	-2.63531	-3.16143	1.75952	-0.28928	0.402119
15.35	-0.797894	-0.14146	1.03951	-1.71979	-2.55107	-0.987061	-3.03586	-1.12376
15.4	2.86422	-0.14146	1.34468	1.63715	0.500683	-1.59741	-0.594456	-2.03929
15.45	0.117634	2.9103	2.87056	1.63715	0.500683	-1.29224	-2.42551	2.84353
15.5	-0.492718	2.29995	2.26021	-1.71979	-0.414845	0.843994	-1.50998	-1.12376
15.55	1.64351	0.163715	0.123981	-2.63531	-0.109669	2.0647	0.931423	-3.56517
15.6	2.25386	1.99477	0.429157	-0.499084	0.500683	2.67505	-2.42551	-3.87034
15.65	-1.71342	4.131	3.17574	1.63715	2.02656	-1.59741	1.54177	-1.73411
15.7	1.03316	-0.446636	-1.70707	-0.193909	0.500683	-3.12329	-3.03586	-5.39622
15.75	4.39009	-0.446636	-0.48637	-3.85602	-2.55107	-1.59741	-4.86692	-11.8049
15.8	0.42281	2.9103	0.734333	-2.33014	-2.85625	-2.81812	-4.25657	-15.467
15.85	0.727985	0.468891	1.03951	0.416443	-3.16143	-3.73364	-11.886	-17.9084
15.9	4.69527	-1.36216	-1.4019	1.94232	-2.2459	-5.25952	-14.3274	-24.9275
15.95	1.03316	0.774067	0.123981	-1.10944	-4.99248	-11.6682	-21.3464	-36.5242
16	0.727985	2.29995	3.48091	-4.16119	-10.7908	-19.6028	-30.5017	-42.6277
16.05	2.25386	-1.05699	-0.791546	-3.55084	-13.2322	-24.7908	-34.469	-47.5105
16.1	2.86422	-1.05699	-0.48637	-2.94049	-16.5892	-31.1995	-45.1501	-54.5295
16.15	-1.10307	1.07924	1.34468	-4.16119	-20.2513	-36.3875	-53.0847	-67.3469
16.2	-0.187542	-0.446636	1.64986	-11.1802	-25.1341	-40.9651	-56.7468	-74.6711
16.25	4.08492	-3.49839	-3.8433	-16.6734	-33.0687	-48.2893	-67.7331	-79.8591
16.3	-0.797894	-1.36216	-2.31743	-19.42	-39.7825	-56.8342	-74.7522	-83.5212
16.35	0.117634	1.99477	-2.31743	-23.6924	-44.3602	-63.5481	-75.9729	-92.6765
16.4	1.64351	-1.36216	-4.75883	-24.9131	-49.5481	-66.5999	-86.0437	-101.221
16.45	2.55904	-3.19322	-11.1675	-33.1529	-52.5999	-69.9568	-91.5368	-104.578
16.5	-2.0186	0.163715	-12.9986	-39.2564	-58.7034	-78.1965	-91.5368	-107.325
16.55	-1.40824	3.52065	-12.6934	-42.9185	-65.7225	-84.9104	-98.2507	-109.766
16.6	2.25386	-1.36216	-18.4917	-45.3599	-70.9104	-86.7415	-104.049	-118.006
16.65	-0.187542	-1.36216	-24.9004	-45.9703	-73.3519	-86.1311	-105.27	-122.279
16.7	-1.40824	-0.14146	-26.7315	-52.379	-74.8777	-94.9812	-108.322	-125.33
16.75	-0.797894	1.68959	-26.7315	-58.1773	-74.8777	-96.2019	-115.035	-126.246
16.8	4.08492	-1.97252	-30.6988	-62.4498	-78.5398	-94.9812	-116.256	-129.908
16.85	-0.187542	-3.19322	-36.4971	-63.0601	-83.7278	-100.78	-116.866	-137.232
16.9	-0.187542	-3.19322	-38.9385	-63.6705	-86.4744	-102.305	-123.275	-139.063
16.95	2.25386	-2.58287	-38.3282	-65.5015	-86.7796	-99.864	-124.496	-139.674
17	4.08492	-7.1605	-41.9903	-68.2481	-87.3899	-107.188	-123.275	-141.199
17.05	1.03316	-9.29673	-47.1783	-71.605	-87.0848	-106.883	-129.073	-143.031
17.1	1.33834	-10.2123	-49.0093	-70.9947	-87.6951	-107.799	-131.21	-148.524
17.15	2.86422	-9.90709	-48.7041	-70.9947	-91.3572	-112.376	-129.684	-151.575
17.2	2.86422	-16.3158	-49.3145	-69.1636	-93.7986	-110.545	-131.21	-153.712
17.25	0.117634	-19.0624	-55.418	-69.1636	-95.3245	-116.954	-135.787	-153.712
17.3	0.117634	-19.0624	-54.1973	-71.9102	-95.0193	-116.649	-135.787	-154.627
17.35	2.55904	-18.1468	-52.6714	-73.7413	-93.4935	-116.649	-133.041	-158.289
17.4	2.25386	-24.5555	-50.8404	-74.6568	-93.1883	-119.7	-136.703	-163.477
17.45	-0.187542	-28.828	-54.1973	-74.3516	-94.409	-115.733	-140.06	-164.393
17.5	0.42281	-27.3021	-55.1128	-73.1309	-96.5452	-121.226	-138.839	-163.477
17.55	2.55904	-25.4711	-52.3663	-72.2154	-98.3763	-120.921	-139.144	-162.562
17.6	3.77974	-29.4383	-50.23	-75.5723	-98.6814	-120.921	-143.417	-165.003
17.65	-0.492718	-32.4901	-51.7559	-77.0982	-98.9866	-122.752	-144.943	-168.97
17.7	-0.187542	-31.8797	-55.418	-77.4034	-97.7659	-118.785	-142.501	-169.581
17.75	0.42281	-29.1332	-54.5025	-75.2672	-94.1038	-125.194	-146.163	-168.97
17.8	2.55904	-27.9125	-52.0611	-75.2672	-95.9349	-123.057	-148.605	-167.75
17.85	-0.492718	-31.2694	-50.5352	-73.7413	-98.0711	-122.752	-147.994	-166.529
17.9	-1.10307	-31.2694	-52.9766	-71.2999	-97.1556	-123.973	-145.553	-168.36
17.95	-0.187542	-29.7435	-53.587	-73.7413	-95.0193	-120.311	-147.994	-171.412
18	2.55904	-27.9125	-52.0611	-74.962	-92.2728	-124.888	-149.825	-170.191
18.05	-0.187542	-29.4383	-48.7041	-76.1827	-95.9349	-123.973	-147.079	-170.801
18.1	-1.71342	-31.8797	-48.0938	-74.3516	-94.7142	-119.7	-145.553	-169.276
18.15	-1.40824	-32.1849	-51.1456	-72.2154	-92.5779	-122.447	-147.994	-167.445
18.2	0.42281	-29.7435	-50.8404	-71.2999	-91.3572	-121.226	-147.689	-168.665
18.25	0.727985	-26.9969	-49.3145	-69.4688	-93.4935	-120.616	-144.637	-172.022
18.3	-2.0186	-29.7435	-46.8731	-70.3843	-91.052	-120.616	-142.806	-172.022
18.35	-1.40824	-30.659	-46.2627	-70.9947	-89.5262	-116.954	-145.553	-170.496
18.4	1.03316	-30.3539	-49.0093	-70.3843	-90.7469	-117.869	-144.332	-169.276
18.45	2.25386	-26.6918	-48.7041	-68.8585	-85.8641	-118.785	-139.755	-167.139
18.5	0.117634	-24.8607	-48.7041	-68.5533	-87.0848	-116.038	-138.839	-166.529
18.55	-1.71342	-26.9969	-45.042	-66.1119	-86.1692	-115.733	-140.975	-167.75
18.6	-1.10307	-27.6073	-43.5162	-63.9756	-80.3709	-117.259	-139.755	-169.276
18.65	0.727985	-25.1659	-46.8731	-61.8394	-84.033	-113.597	-136.092	-168.36
18.7	1.94869	-23.3348	-47.1783	-60.6187	-82.2019	-113.292	-135.482	-167.75
18.75	-1.71342	-19.9779	-46.2627	-63.0601	-78.845	-113.292	-137.924	-165.003
18.8	-2.93412	-21.5038	-41.0747	-62.4498	-80.6761	-109.63	-137.313	-161.646
18.85	-2.0186	-23.64	-39.854	-63.0601	-74.5726	-109.019	-134.872	-160.731
18.9	1.03316	-22.1141	-41.0747	-61.2291	-79.1502	-109.63	-133.041	-162.867
18.95	1.33834	-21.8089	-41.6851	-59.7032	-75.1829	-106.578	-134.567	-161.951
19	-2.32377	-17.8417	-39.2437	-58.4825	-73.657	-104.136	-134.567	-159.205
19.05	-1.71342	-18.1468	-37.4126	-56.0411	-73.3519	-107.188	-131.82	-157.679
19.1	-0.492718	-21.8089	-34.0557	-54.21	-68.1639	-102.916	-127.548	-154.017
19.15	1.94869	-20.2831	-32.835	-52.0738	-71.5208	-98.9485	-128.768	-150.66
19.2	2.25386	-19.9779	-35.2764	-52.379	-68.1639	-102.611	-126.632	-145.167
19.25	-0.797894	-17.2313	-35.2764	-51.4634	-68.1639	-100.169	-123.885	-144.556
19.3	-0.797894	-15.0951	-33.7505	-52.6841	-67.8587	-95.2864	-119.003	-144.251
19.35	-0.187542	-17.5365	-31.6143	-50.2427	-61.1448	-95.8967	-116.256	-143.946
19.4	1.03316	-19.0624	-28.5625	-47.8013	-65.4173	-94.3709	-115.951	-140.284
19.45	1.94869	-17.8417	-28.2574	-46.5806	-61.45	-89.488	-112.899	-136.927
19.5	-0.187542	-16.0106	-29.4781	-44.7496	-58.3982	-87.657	-108.932	-134.486
19.55	-2.32377	-14.1795	-31.0039	-42.003	-60.2293	-88.2673	-103.439	-131.739
19.6	-1.71342	-12.0433	-28.8677	-39.8668	-54.431	-83.0793	-102.523	-129.298
19.65	-0.492718	-13.5692	-27.647	-36.5098	-56.262	-78.1965	-102.828	-125.941
19.7	1.94869	-14.4847	-25.5108	-36.2047	-53.5154	-79.4172	-99.1662	-127.161
19.75	2.86422	-15.0951	-23.6797	-36.2047	-48.9378	-77.281	-95.1989	-127.161
19.8	-0.187542	-12.6537	-25.2056	-36.5098	-49.8533	-70.262	-91.842	-126.551
19.85	-1.10307	-10.8226	-26.4263	-35.8995	-47.1067	-72.093	-93.0627	-126.246
19.9	-0.187542	-9.29673	-24.9004	-34.3736	-42.2239	-71.4827	-93.6731	-125.33
19.95	1.33834	-9.90709	-23.6797	-31.9322	-44.9705	-66.5999	-92.4524	-123.499
20	3.16939	-12.9588	-22.459	-29.796	-42.2239	-63.5481	-89.7058	-121.058
20.05	2.25386	-12.0433	-18.7969	-27.9649	-36.1204	-64.7688	-87.2644	-119.227
20.1	0.117634	-11.433	-17.8814	-30.4063	-39.1722	-62.6326	-89.7058	-117.701
20.15	-0.492718	-9.90709	-20.628	-30.4063	-36.4256	-56.8342	-90.3161	-117.396
20.2	-0.492718	-8.99156	-20.9331	-27.6597	-30.3221	-57.1394	-87.8747	-116.48
20.25	0.42281	-6.55015	-19.7124	-24.3028	-32.4583	-57.4446	-84.823	-116.175
20.3	1.94869	-8.38121	-17.5762	-25.5235	-29.7117	-55.0032	-80.8557	-115.87
20.35	3.16939	-10.8226	-16.0503	-25.2183	-24.8289	-50.7307	-82.9919	-114.039
20.4	0.117634	-10.8226	-14.5245	-22.7769	-26.9651	-52.8669	-82.6867	-112.208
20.45	-1.71342	-9.29673	-12.0831	-19.1148	-26.0496	-51.6462	-79.635	-109.766
20.5	-0.797894	-6.85533	-12.6934	-21.5562	-20.2513	-48.2893	-75.9729	-106.715
20.55	-0.187542	-5.63462	-13.3038	-20.0303	-20.8616	-46.1531	-71.7004	-104.273
20.6	1.94869	-4.10875	-13.9141	-14.5372	-21.7771	-47.9841	-70.1745	-104.578
20.65	2.55904	-5.32945	-12.6934	-18.1993	-18.4202	-45.5427	-69.8694	-106.715
20.7	1.33834	-7.1605	-11.7779	-16.9786	-16.5892	-41.8806	-66.8176	-104.578
20.75	-0.187542	-6.85533	-9.03129	-12.7061	-18.115	-42.491	-64.071	-103.663
20.8	-0.797894	-6.24498	-8.11576	-16.6734	-15.6736	-43.1013	-59.7986	-100.611
20.85	-0.187542	-4.7191	-5.36918	-13.3165	-11.7063	-40.6599	-56.1364	-102.747
20.9	-0.492718	-1.36216	-5.97953	-9.34918	-15.0633	-36.3875	-57.052	-105.189
20.95	1.03316	-4.7191	-7.50541	-13.3165	-13.2322	-36.0823	-56.4416	-105.189
21	2.86422	-6.85533	-9.03129	-10.2647	-8.95977	-35.7771	-54.9157	-102.747
21.05	2.86422	-5.02427	-7.81059	-7.8233	-10.7908	-32.115	-53.0847	-107.02
21.1	1.64351	-1.36216	-7.20024	-9.95953	-11.096	-27.8425	-49.7278	-110.987
21.15	-0.492718	-3.49839	-5.67436	-6.6026	-8.04424	-28.4529	-46.9812	-111.597
21.2	0.727985	-6.24498	-3.8433	-7.51813	-6.21318	-28.1477	-49.7278	-116.785
21.25	1.64351	-2.88804	-2.31743	-8.43365	-9.57012	-26.0115	-49.7278	-121.973
21.3	3.77974	-1.05699	-4.45366	-2.94049	-6.82354	-20.2131	-48.2019	-124.11
21.35	3.16939	-4.7191	-6.58989	-7.51813	-2.55107	-21.1287	-47.5915	-128.687
21.4	-0.187542	-2.58287	-5.06401	-5.68707	-5.60283	-20.5183	-45.7605	-135.706
21.45	0.117634	-1.66734	-2.92778	-1.10944	-5.60283	-18.3821	-43.9294	-134.791
21.5	1.94869	-3.19322	-1.09672	-4.46637	-1.0252	-14.72	-46.3708	-142.725
21.55	1.33834	-0.751812	-4.45366	-3.85602	0.805859	-14.1096	-49.1174	-147.913
21.6	-1.40824	-1.66734	-4.75883	0.721619	-3.4666	-15.9407	-49.1174	-146.998
21.65	-1.40824	-2.88804	-0.791546	-2.63531	-1.94072	-14.4148	-49.1174	-157.984
21.7	1.33834	3.52065	-0.791546	-2.63531	3.24727	-11.9734	-47.5915	-160.426
21.75	-3.2393	-1.66734	-2.6226	1.63715	1.11103	-10.4475	-45.1501	-161.036
21.8	-1.10307	-0.14146	-1.09672	-2.02496	-0.109669	-14.4148	-45.4553	-169.886
21.85	1.64351	0.468891	1.34468	-1.10944	2.63691	-13.4993	-47.2863	-171.107
21.9	-2.32377	-1.66734	-3.23295	2.2475	5.68867	-12.8889	-48.5071	-174.769
21.95	-0.797894	2.9103	-0.181194	1.02679	3.24727	-10.1423	-47.5915	-179.652
22	1.64351	-1.97252	1.64986	0.721619	4.77314	-13.8044	-47.2863	-180.872
22.05	-1.40824	-0.14146	-2.6226	3.16303	6.29902	-15.9407	-45.4553	-187.586
22.1	2.55904	-0.14146	1.95504	6.21478	8.43525	-15.6355	-44.8449	-190.943
22.15	-1.10307	-1.05699	0.429157	1.63715	5.38349	-13.4993	-42.4035	-192.164
22.2	-1.40824	3.52065	-0.48637	2.55267	6.90937	-10.7527	-44.8449	-201.624
22.25	2.86422	-2.58287	4.09127	5.90961	8.74043	-14.72	-46.3708	-206.202
22.3	-2.32377	0.468891	-0.48637	4.6889	9.96113	-14.1096	-47.2863	-207.117
22.35	2.25386	1.38442	1.64986	2.85785	6.6042	-15.0251	-46.9812	-215.662
22.4	-2.0186	-1.05699	2.87056	3.77338	7.8249	-10.4475	-46.9812	-221.766
22.45	-1.40824	1.68959	0.123981	7.13031	9.35078	-10.4475	-46.9812	-224.207
22.5	1.94869	-0.751812	4.39644	3.4682	9.65596	-14.1096	-46.0656	-228.175
22.55	-1.71342	-0.751812	1.03951	3.77338	7.51973	-13.4993	-46.676	-235.804
22.6	2.86422	3.52065	1.64986	4.6889	7.8249	-12.5837	-49.1174	-239.466
22.65	0.117634	-1.66734	3.17574	7.43549	10.8767	-7.70093	-50.0329	-241.602
22.7	0.727985	-0.14146	0.123981	3.77338	10.5715	-7.70093	-50.3381	-250.452
22.75	2.86422	3.52065	3.78609	5.60443	9.04561	-11.0579	-48.2019	-254.42
22.8	-0.492718	-0.751812	2.56539	6.21478	9.35078	-9.83716	-46.0656	-257.166
22.85	1.64351	0.774067	0.734333	7.74066	11.487	-6.7854	-50.9485	-264.796
22.9	-0.492718	2.9103	4.70162	5.60443	13.6232	-4.64917	-53.695	-272.12
22.95	-2.93412	-0.446636	0.429157	5.29925	11.1818	-4.95435	-53.0847	-276.392
23	2.55904	1.38442	1.03951	6.51996	11.7922	-7.09058	-51.5588	-277.918
23.05	-2.0186	2.9103	5.61715	8.04584	14.2336	-7.09058	-57.9675	-286.768
23.1	-0.492718	-0.751812	0.123981	4.99408	16.3698	-5.86987	-60.4089	-290.736
23.15	2.55904	-0.446636	0.429157	5.90961	13.0129	-3.73364	-59.4934	-291.346
23.2	-1.71342	3.82583	5.61715	7.13031	12.7077	-1.90259	-63.4607	-293.482
23.25	0.117634	-0.751812	1.34468	8.04584	13.6232	-5.25952	-67.1228	-301.112
23.3	3.77974	-0.446636	0.734333	4.6889	16.0646	-6.48022	-66.5124	-303.553
23.35	-1.71342	2.9103	5.31197	4.6889	15.1491	-5.5647	-70.4797	-302.943
23.4	-0.492718	-0.14146	1.95504	6.51996	12.4025	-4.64917	-72.3108	-306.91
23.45	3.47457	-0.14146	2.56539	8.96137	13.6232	-3.12329	-68.6487	-313.624
23.5	-0.492718	3.21547	4.70162	5.29925	15.4543	-4.95435	-74.447	-315.455
23.55	-0.492718	1.07924	3.78609	4.99408	17.8957	-8.0061	-74.7522	-314.234
23.6	4.08492	-0.14146	1.95504	6.51996	13.6232	-10.1423	-71.7004	-317.896
23.65	-0.492718	2.29995	4.39644	9.87689	12.7077	-10.4475	-75.9729	-323.695
23.7	-0.492718	2.29995	4.39644	7.43549	12.7077	-8.0061	-73.5315	-325.22
23.75	4.39009	-0.751812	0.734333	5.29925	14.5388	-7.39575	-75.0573	-323.389
23.8	0.42281	1.07924	2.56539	6.51996	15.7595	-9.53198	-75.6677	-326.441
23.85	-0.187542	3.82583	5.31197	8.35101	12.0974	-12.5837	-71.7004	-331.324
23.9	1.33834	-0.14146	1.64986	9.57172	10.5715	-12.8889	-76.8884	-333.155
23.95	1.64351	-0.446636	1.03951	6.21478	11.487	-11.9734	-73.5315	-330.714
24	-1.71342	2.9103	4.39644	6.51996	15.1491	-11.6682	-74.1418	-333.155
24.05	0.42281	2.29995	3.78609	6.51996	14.5388	-9.22681	-75.6677	-337.122
24.1	3.16939	-0.751812	1.64986	10.1821	9.96113	-8.31128	-72.3108	-338.648
24.15	-1.71342	0.774067	2.26021	8.35101	10.5715	-11.0579	-77.8039	-337.122
24.2	-1.10307	4.43618	5.92232	6.21478	11.1818	-12.5837	-75.0573	-337.733
24.25	3.47457	-0.446636	2.87056	6.21478	13.3181	-12.2786	-74.447	-344.752
24.3	-0.187542	0.468891	2.26021	7.43549	13.6232	-11.9734	-78.1091	-347.803
24.35	-0.797894	4.131	3.78609	9.57172	10.2663	-9.53198	-76.8884	-349.634
24.4	1.03316	0.468891	6.2275	6.82513	9.65596	-7.39575	-78.4143	-347.803
24.45	1.03316	-0.446636	2.26021	5.29925	10.2663	-8.61646	-80.8557	-353.602
24.5	-0.797894	1.38442	3.17574	5.60443	11.7922	-11.6682	-78.4143	-358.485
24.55	0.42281	2.60512	6.2275	6.82513	13.9284	-12.2786	-82.3816	-359.095
24.6	3.47457	-1.97252	4.39644	8.65619	10.8767	-10.4475	-83.9074	-359.4
24.65	-0.797894	-1.66734	2.56539	6.51996	9.35078	-10.1423	-80.5505	-359.705
24.7	-0.187542	2.60512	3.17574	4.07855	10.5715	-8.31128	-84.2126	-366.419
24.75	1.64351	-1.05699	5.31197	5.29925	11.487	-11.9734	-86.3488	-367.335
24.8	1.94869	-1.66734	3.48091	7.43549	13.6232	-12.5837	-84.823	-368.25
24.85	-1.10307	0.774067	1.64986	10.4872	12.7077	-12.5837	-86.654	-367.64
24.9	0.117634	2.60512	2.56539	8.04584	9.04561	-8.31128	-89.4006	-371.912
24.95	4.39009	-1.97252	5.61715	4.99408	7.8249	-11.9734	-88.4851	-376.49
25	1.33834	-0.446636	2.26021	6.21478	9.04561	-13.4993	-88.4851	-376.49
25.05	-0.187542	2.9103	1.95504	7.43549	10.8767	-12.5837	-91.842	-376.49
25.1	0.117634	1.07924	3.17574	9.57172	12.4025	-13.1941	-90.3161	-375.269
25.15	2.86422	-1.66734	4.39644	9.26654	10.2663	-15.0251	-89.0954	-380.152
25.2	-0.492718	-0.14146	0.734333	5.90961	7.51973	-13.1941	-91.842	-381.068
25.25	-1.40824	3.82583	0.734333	4.99408	9.35078	-14.72	-90.6213	-381.983
25.3	1.33834	-0.14146	1.64986	4.99408	9.04561	-16.8562	-85.7385	-381.373
25.35	2.25386	-1.36216	4.70162	7.13031	9.35078	-12.2786	-89.4006	-379.542
25.4	-1.71342	-0.14146	1.34468	10.4872	10.2663	-16.2459	-88.7903	-382.593
25.45	-0.797894	4.131	0.123981	8.04584	10.8767	-15.3303	-84.5178	-385.035
25.5	1.64351	-0.14146	1.64986	4.6889	7.8249	-13.1941	-84.5178	-385.035
25.55	1.33834	-1.05699	5.00679	4.6889	6.90937	-15.6355	-88.4851	-384.425
25.6	-1.71342	0.774067	1.95504	5.90961	7.51973	-11.6682	-86.9592	-382.899
25.65	-1.10307	3.52065	0.429157	8.35101	8.43525	-15.3303	-81.466	-385.035
25.7	1.03316	0.163715	1.64986	8.65619	11.1818	-14.4148	-86.0437	-388.392
25.75	2.55904	0.163715	5.92232	7.43549	12.7077	-12.8889	-86.654	-388.392
25.8	-0.187542	1.07924	4.09127	5.29925	10.8767	-15.6355	-83.2971	-388.697
25.85	0.727985	2.60512	1.03951	5.60443	8.74043	-10.1423	-83.6023	-387.171
25.9	3.16939	0.163715	1.95504	5.90961	7.51973	-15.9407	-86.654	-386.561
25.95	3.77974	-0.446636	4.09127	7.74066	7.51973	-13.1941	-85.1281	-390.223
26	0.42281	0.774067	4.39644	9.57172	8.13008	-12.5837	-82.0764	-392.054
26.05	2.55904	4.43618	1.34468	9.57172	10.8767	-13.1941	-85.7385	-391.749
26.1	3.16939	1.38442	-0.181194	7.13031	10.5715	-8.61646	-86.654	-391.444
26.15	4.39009	-0.14146	1.34468	4.99408	7.8249	-14.1096	-85.1281	-391.138
26.2	0.42281	0.163715	2.87056	5.29925	6.6042	-11.6682	-84.2126	-391.749
26.25	1.03316	3.52065	3.17574	5.29925	7.21455	-10.7527	-87.8747	-394.801
26.3	2.55904	3.82583	0.429157	6.82513	9.65596	-14.4148	-88.4851	-396.632
26.35	3.47457	-0.446636	1.34468	7.43549	8.74043	-10.4475	-86.0437	-396.632
26.4	0.727985	-0.14146	2.26021	7.13031	5.07832	-14.72	-86.9592	-396.326
26.45	0.42281	2.60512	4.70162	4.99408	5.99385	-14.4148	-90.9265	-393.275
26.5	0.727985	4.74135	3.48091	3.16303	10.5715	-11.363	-89.7058	-395.106
26.55	3.77974	1.38442	1.34468	3.16303	6.29902	-16.2459	-88.4851	-397.547
26.6	2.55904	-0.14146	1.64986	4.07855	6.29902	-15.0251	-88.7903	-399.683
26.65	-0.187542	-0.14146	2.56539	5.90961	9.96113	-11.9734	-93.3679	-398.157
26.7	-0.187542	2.60512	5.31197	6.82513	6.29902	-17.4666	-91.2317	-397.852
26.75	2.55904	2.9103	1.03951	7.74066	5.99385	-15.9407	-88.7903	-395.106
26.8	3.77974	-0.751812	-0.791546	4.38373	9.35078	-14.4148	-89.7058	-393.885
26.85	0.117634	-0.751812	-0.181194	3.4682	5.07832	-17.7717	-92.4524	-395.411
26.9	-2.0186	0.468891	1.95504	1.94232	6.6042	-16.2459	-90.011	-397.547
26.95	-0.797894	3.52065	3.78609	3.4682	8.13008	-13.8044	-86.9592	-396.937
27	3.16939	2.29995	3.17574	2.55267	3.85762	-18.3821	-86.9592	-396.021
27.05	3.77974	-0.14146	0.429157	4.6889	7.8249	-16.2459	-90.011	-395.716
27.1	-0.492718	-0.446636	1.64986	5.90961	3.85762	-12.5837	-89.4006	-394.19
27.15	-0.492718	1.07924	2.56539	8.04584	5.38349	-16.8562	-86.9592	-392.969
27.2	0.727985	3.82583	4.70162	6.82513	7.8249	-15.3303	-85.4333	-395.716
27.25	3.47457	1.99477	4.70162	3.4682	4.46797	-10.4475	-89.0954	-397.852
27.3	3.16939	-0.751812	2.26021	3.77338	8.43525	-14.72	-89.7058	-399.378
27.35	0.117634	-0.446636	0.429157	3.4682	5.07832	-14.1096	-87.2644	-399.073
27.4	0.117634	1.38442	1.95504	4.99408	7.21455	-9.22681	-83.9074	-399.683
27.45	-0.187542	2.9103	3.17574	4.07855	7.21455	-13.4993	-88.1799	-398.157
27.5	3.16939	3.21547	4.09127	5.29925	5.38349	-13.8044	-88.7903	-396.326
27.55	3.47457	-1.05699	1.03951	7.13031	9.35078	-10.7527	-87.2644	-396.326
27.6	0.42281	-0.446636	-1.09672	7.43549	4.77314	-11.6682	-84.823	-398.768
27.65	0.117634	-1.66734	-1.4019	8.04584	5.38349	-11.9734	-87.5696	-400.904
27.7	1.33834	1.68959	-0.48637	5.90961	6.6042	-10.4475	-90.6213	-400.599
27.75	3.16939	3.82583	1.34468	4.99408	4.77314	-8.61646	-89.4006	-399.988
27.8	5.00045	0.468891	3.48091	3.4682	8.43525	-13.1941	-88.1799	-401.82
27.85	2.55904	-1.97252	-0.791546	3.77338	3.85762	-10.7527	-87.2644	-400.294
27.9	0.117634	-1.05699	-3.53813	2.85785	3.85762	-7.39575	-91.5368	-398.768
27.95	-0.187542	1.38442	-1.4019	3.4682	9.04561	-12.2786	-91.5368	-396.632
28	0.727985	2.9103	-0.181194	2.55267	3.85762	-12.8889	-92.7575	-397.242
28.05	3.77974	2.9103	0.734333	3.4682	4.77314	-9.53198	-91.5368	-398.768
28.1	3.47457	-0.446636	2.26021	5.60443	7.8249	-9.83716	-92.1472	-399.683
28.15	-0.797894	-1.05699	1.34468	5.60443	3.24727	-12.8889	-94.5886	-399.683
28.2	-1.10307	0.468891	-0.181194	3.77338	5.68867	-11.9734	-94.2834	-398.768
28.25	0.727985	1.38442	-0.181194	2.2475	7.51973	-9.22681	-94.5886	-397.547
28.3	1.64351	3.82583	0.123981	3.16303	3.55244	-13.1941	-90.9265	-396.632
28.35	4.08492	2.9103	1.95504	3.77338	5.68867	-13.4993	-91.5368	-394.801
28.4	3.47457	0.163715	3.48091	5.60443	8.13008	-11.363	-94.2834	-393.58
28.45	1.03316	-0.751812	4.39644	7.13031	4.46797	-12.8889	-93.6731	-393.275
28.5	0.117634	-0.14146	1.95504	5.60443	6.29902	-15.3303	-92.4524	-393.58
28.55	-0.492718	-0.446636	-0.48637	3.77338	7.8249	-12.8889	-90.3161	-395.106
28.6	1.03316	1.68959	-0.791546	4.99408	4.16279	-10.1423	-90.9265	-395.716
28.65	2.25386	2.9103	0.123981	8.96137	5.38349	-13.1941	-93.9782	-397.547
28.7	2.25386	0.774067	0.123981	4.6889	7.8249	-14.72	-94.8938	-396.326
28.75	-1.10307	-1.36216	1.95504	4.07855	2.94209	-11.9734	-93.0627	-395.411
28.8	-2.32377	-1.05699	4.09127	6.82513	3.24727	-10.1423	-90.6213	-394.495
28.85	-1.40824	1.07924	3.17574	6.51996	8.43525	-13.4993	-89.7058	-393.885
28.9	-1.10307	1.07924	-0.181194	3.77338	2.94209	-13.4993	-92.1472	-392.969
28.95	0.42281	2.29995	0.429157	5.60443	3.85762	-10.7527	-92.1472	-393.58
29	1.94869	4.43618	0.429157	7.13031	6.29902	-10.1423	-90.9265	-396.937
29.05	2.55904	0.163715	1.03951	2.85785	5.38349	-13.4993	-89.4006	-396.937
29.1	-1.71342	-1.66734	1.03951	4.99408	3.24727	-12.5837	-86.9592	-395.411
29.15	-1.10307	-2.27769	2.26021	6.21478	4.46797	-10.4475	-87.5696	-391.138
29.2	-0.797894	0.774067	4.39644	2.2475	6.6042	-10.4475	-90.9265	-394.801
29.25	-1.10307	2.9103	2.56539	4.99408	3.24727	-15.0251	-91.5368	-396.632
29.3	1.33834	-0.446636	-1.09672	4.07855	4.16279	-12.8889	-91.2317	-393.275
29.35	3.77974	-2.58287	-1.4019	3.4682	6.29902	-10.1423	-90.3161	-390.528
29.4	2.86422	-0.446636	-0.48637	7.13031	3.55244	-12.2786	-87.8747	-392.969
29.45	0.117634	3.82583	0.123981	2.55267	3.85762	-15.6355	-89.7058	-391.749
29.5	0.42281	-1.05699	1.34468	2.2475	5.07832	-14.4148	-93.0627	-386.866
29.55	1.03316	-0.751812	2.56539	6.51996	5.38349	-11.9734	-93.6731	-390.528
29.6	0.727985	1.68959	2.87056	2.2475	2.63691	-13.1941	-92.1472	-389.613
29.65	3.77974	1.38442	0.734333	3.16303	4.46797	-15.9407	-90.6213	-384.119
29.7	1.94869	-0.14146	-0.181194	6.51996	8.13008	-15.3303	-88.7903	-389.002
29.75	-1.71342	3.21547	-0.181194	1.33197	4.16279	-11.9734	-87.5696	-388.392
29.8	-0.187542	-0.446636	1.34468	5.29925	3.24727	-11.6682	-89.4006	-384.119
29.85	3.77974	-1.66734	2.26021	6.21478	6.29902	-14.1096	-89.7058	-388.697
29.9	1.64351	3.82583	-1.4019	3.4682	7.51973	-14.4148	-88.1799	-389.307
29.95	-0.492718	-1.05699	-0.791546	4.99408	4.16279	-11.9734	-86.9592	-387.171
30	1.94869	1.68959	3.17574	7.43549	5.07832	-9.53198	-84.823	-392.359
30.05	3.77974	0.163715	1.03951	4.07855	8.74043	-13.1941	-81.7712	-389.002
30.1	-1.10307	-1.05699	-1.09672	4.38373	6.29902	-13.4993	-83.9074	-391.444
30.15	1.94869	2.9103	0.734333	8.04584	3.55244	-12.8889	-86.9592	-392.664
30.2	2.86422	-1.36216	1.64986	2.85785	5.68867	-8.92163	-87.5696	-388.697
30.25	-1.10307	1.38442	-0.791546	3.4682	9.35078	-11.9734	-86.654	-392.054
30.3	1.03316	0.163715	1.64986	5.90961	5.07832	-13.4993	-86.9592	-392.054
30.35	0.117634	-2.27769	0.123981	3.4682	3.85762	-12.5837	-86.654	-388.087
30.4	-1.10307	2.60512	-2.01225	1.33197	5.99385	-9.22681	-84.5178	-392.969
30.45	3.16939	-1.66734	3.78609	3.16303	8.43525	-6.7854	-84.2126	-392.054
30.5	-2.0186	1.68959	-0.48637	4.6889	3.85762	-9.83716	-86.3488	-387.476
30.55	1.94869	-0.751812	-0.791546	1.63715	4.46797	-11.0579	-87.8747	-392.359
30.6	2.86422	-1.36216	2.87056	2.2475	5.07832	-11.0579	-87.2644	-390.833
30.65	-0.492718	3.82583	-1.09672	5.29925	7.51973	-8.61646	-86.654	-385.34
30.7	5.00045	-0.751812	2.56539	4.38373	3.85762	-8.0061	-85.7385	-388.392
30.75	0.117634	1.99477	1.03951	1.63715	3.55244	-10.1423	-85.1281	-386.561
30.8	3.16939	-0.14146	-0.181194	3.16303	6.29902	-11.0579	-83.6023	-381.983
30.85	1.64351	-1.05699	4.09127	6.82513	7.51973	-10.7527	-84.823	-382.899
30.9	-0.187542	4.43618	-0.181194	3.77338	3.85762	-9.53198	-86.3488	-382.288
30.95	5.00045	-1.05699	1.95504	1.94232	4.46797	-9.53198	-88.1799	-378.321
31	-0.492718	0.774067	2.87056	2.85785	6.90937	-12.5837	-86.9592	-376.185
31.05	1.64351	2.9103	-0.181194	6.82513	7.51973	-13.1941	-86.0437	-379.237
31.1	1.33834	-0.751812	3.78609	3.77338	4.46797	-11.9734	-82.6867	-376.795
31.15	0.117634	2.29995	1.34468	2.2475	5.38349	-10.7527	-85.1281	-374.354
31.2	5.00045	3.21547	0.123981	3.77338	6.29902	-8.61646	-86.3488	-377.711
31.25	-0.187542	-0.446636	4.39644	6.82513	9.04561	-11.9734	-86.0437	-378.321
31.3	0.117634	1.68959	-0.48637	3.16303	5.38349	-12.8889	-81.466	-376.795
31.35	4.39009	2.60512	-0.181194	2.2475	3.85762	-12.5837	-83.9074	-376.49
31.4	-1.40824	-1.66734	4.09127	3.77338	5.38349	-9.83716	-84.823	-380.152
31.45	0.727985	0.774067	-0.181194	7.74066	7.51973	-7.09058	-80.5505	-378.626
31.5	1.94869	2.29995	0.123981	4.38373	5.99385	-11.363	-80.5505	-375.574
31.55	-1.40824	-1.36216	4.39644	2.55267	3.55244	-12.2786	-81.7712	-375.269
31.6	-0.187542	0.468891	-1.09672	3.77338	4.16279	-12.2786	-79.635	-378.626
31.65	3.47457	1.68959	-1.70707	7.43549	6.29902	-11.363	-79.0246	-375.269
31.7	-1.40824	-0.751812	2.56539	5.29925	7.8249	-10.4475	-80.8557	-371.912
31.75	1.33834	1.07924	-0.791546	1.63715	3.85762	-8.61646	-78.4143	-374.659
31.8	2.86422	4.131	-1.70707	2.2475	3.55244	-11.0579	-80.2453	-377.1
31.85	-0.797894	-0.446636	-0.181194	6.21478	4.46797	-12.2786	-81.7712	-374.354
31.9	0.117634	0.468891	1.03951	4.99408	8.43525	-11.6682	-75.3625	-372.217
31.95	2.86422	4.74135	-1.4019	1.63715	7.51973	-10.7527	-79.635	-375.88
32	-1.10307	-0.751812	0.123981	1.94232	4.16279	-8.0061	-77.8039	-376.795
32.05	-0.492718	-0.446636	3.17574	4.6889	5.99385	-6.48022	-78.4143	-376.795
32.1	3.16939	2.9103	-1.4019	7.13031	7.21455	-9.22681	-79.3298	-374.964
32.15	-1.71342	0.163715	0.429157	3.16303	10.8767	-11.363	-75.3625	-379.542
32.2	0.42281	-1.36216	3.48091	2.85785	8.13008	-10.1423	-80.2453	-381.678
32.25	4.39009	1.07924	1.34468	3.4682	7.51973	-8.92163	-79.635	-382.288
32.3	1.03316	1.07924	-0.791546	6.21478	7.21455	-7.39575	-77.1936	-379.847
32.35	0.727985	-1.36216	1.34468	6.51996	9.04561	-5.5647	-81.466	-383.509
32.4	2.86422	0.163715	4.39644	2.85785	11.1818	-7.70093	-76.5832	-386.561
32.45	3.16939	2.60512	-0.791546	2.55267	8.74043	-9.53198	-80.5505	-385.95
32.5	-0.187542	-1.05699	-0.791546	4.99408	7.21455	-8.61646	-80.2453	-383.204
32.55	1.33834	-0.751812	2.56539	7.13031	7.21455	-9.83716	-76.5832	-385.645
32.6	3.47457	2.29995	1.95504	4.07855	9.04561	-8.31128	-80.5505	-388.697
32.65	0.727985	-0.446636	-1.09672	2.85785	10.8767	-7.09058	-79.635	-387.476
32.7	1.33834	-1.97252	0.123981	2.85785	10.2663	-6.17505	-78.4143	-383.814
32.75	4.39009	-0.751812	3.48091	4.6889	7.8249	-8.92163	-80.8557	-384.119
32.8	1.64351	2.9103	0.734333	6.82513	7.51973	-9.53198	-77.8039	-387.781
32.85	-0.187542	-1.97252	-0.791546	4.6889	7.8249	-8.0061	-79.3298	-385.645
32.9	3.16939	-1.97252	1.64986	2.55267	9.04561	-7.09058	-80.2453	-382.593
32.95	4.08492	1.68959	4.09127	2.85785	10.5715	-4.95435	-76.278	-379.237
33	-1.10307	1.38442	-0.181194	3.77338	8.13008	-5.25952	-77.1936	-380.457
33.05	-0.492718	-2.27769	-0.48637	5.60443	5.99385	-7.70093	-78.7195	-379.847
33.1	2.86422	-1.97252	0.734333	3.77338	7.21455	-7.39575	-75.3625	-375.574
33.15	0.42281	2.9103	2.56539	1.02679	8.43525	-6.17505	-75.9729	-371.302
33.2	-1.71342	-1.36216	-1.4019	1.63715	12.0974	-4.64917	-77.1936	-368.555
33.25	0.42281	-1.36216	-1.4019	2.2475	10.2663	-7.70093	-74.447	-370.081
33.3	3.47457	-0.446636	1.03951	5.29925	7.8249	-7.70093	-73.2263	-369.471
33.35	-1.10307	2.29995	1.03951	5.60443	7.21455	-4.34399	-75.6677	-367.335
33.4	-0.797894	-1.05699	-1.4019	1.94232	7.8249	-6.17505	-72.9211	-363.367
33.45	1.94869	-1.05699	-1.4019	1.94232	8.74043	-8.61646	-70.7849	-364.283
33.5	2.25386	1.68959	2.87056	2.2475	10.5715	-5.25952	-73.8366	-367.945
33.55	-2.0186	1.99477	2.87056	4.07855	9.65596	-7.39575	-73.2263	-365.198
33.6	-1.40824	-1.36216	-0.791546	6.21478	7.8249	-8.31128	-69.259	-363.673
33.65	2.55904	-0.446636	0.734333	4.38373	6.90937	-4.64917	-73.8366	-359.705
33.7	1.94869	1.99477	1.95504	1.94232	7.51973	-8.0061	-73.8366	-360.01
33.75	-1.10307	1.07924	3.48091	2.2475	8.74043	-6.7854	-72.0056	-359.705
33.8	0.117634	-2.27769	-0.181194	3.16303	10.8767	-3.42847	-72.6159	-356.959
33.85	3.47457	-1.36216	-0.48637	4.38373	13.3181	-7.39575	-75.3625	-354.517
33.9	1.64351	0.774067	0.429157	6.21478	9.96113	-2.81812	-75.0573	-349.329
33.95	0.727985	0.774067	2.56539	4.38373	9.04561	-6.17505	-71.3952	-347.803
34	1.03316	-1.66734	-0.791546	2.55267	7.8249	-5.86987	-76.278	-349.634
34.05	4.39009	-0.14146	-1.70707	1.94232	9.35078	-3.12329	-76.278	-348.414
34.1	1.94869	1.07924	-2.01225	3.77338	8.74043	-5.86987	-74.7522	-346.583
34.15	-0.492718	1.68959	0.734333	4.6889	10.2663	-0.376709	-74.7522	-341.09
34.2	-0.492718	-1.05699	0.734333	5.90961	11.7922	-7.09058	-77.1936	-338.648
34.25	3.16939	-0.14146	-2.31743	4.07855	9.65596	-4.64917	-75.3625	-339.869
34.3	1.03316	0.774067	-1.09672	1.33197	6.90937	-3.73364	-71.3952	-340.174
34.35	-2.32377	1.38442	0.123981	1.94232	7.21455	-6.17505	-74.447	-338.038
34.4	-2.32377	-1.36216	2.87056	2.55267	8.13008	-1.90259	-73.8366	-334.986
34.45	1.03316	-1.36216	-0.791546	1.94232	9.96113	-7.39575	-71.0901	-331.629
34.5	0.727985	-0.14146	-1.4019	3.77338	11.7922	-4.34399	-70.4797	-332.239
34.55	-2.93412	1.68959	-1.09672	6.51996	8.13008	-4.03882	-73.5315	-334.681
34.6	-2.93412	-0.751812	1.34468	3.4682	7.8249	-7.09058	-72.3108	-334.986
34.65	-0.797894	-1.36216	1.95504	0.416443	9.65596	-3.12329	-68.6487	-334.071
34.7	1.94869	-0.446636	-2.01225	1.63715	12.0974	-8.31128	-70.1745	-332.85
34.75	-2.32377	2.29995	-1.4019	1.94232	8.43525	-8.0061	-72.6159	-331.324
34.8	-2.62895	0.468891	-1.4019	3.77338	7.21455	-4.64917	-71.0901	-331.629
34.85	-1.40824	-1.36216	2.56539	4.6889	9.04561	-9.53198	-67.4279	-334.071
34.9	1.33834	-0.751812	1.34468	6.21478	10.2663	-7.09058	-69.259	-336.207
34.95	-0.187542	0.163715	-1.4019	5.60443	7.51973	-5.5647	-71.7004	-334.071
35	-2.93412	2.29995	-0.791546	3.4682	9.35078	-7.70093	-71.3952	-334.376
35.05	-1.40824	0.163715	-0.181194	2.55267	10.2663	-5.5647	-68.9538	-333.155
35.1	0.42281	-1.05699	2.56539	2.55267	7.8249	-5.5647	-71.7004	-332.239
35.15	2.25386	-1.36216	1.34468	3.16303	10.8767	-7.09058	-73.5315	-334.376
35.2	-0.187542	0.774067	-1.4019	4.07855	8.74043	-3.73364	-71.7004	-335.596
35.25	-1.10307	1.99477	-1.09672	5.29925	8.13008	-5.5647	-69.259	-335.596
35.3	-0.492718	-2.58287	-1.4019	4.99408	11.7922	-7.70093	-72.3108	-335.291
35.35	2.55904	-2.88804	1.03951	5.29925	6.90937	-4.95435	-73.2263	-333.46
35.4	2.25386	-1.66734	1.64986	3.16303	8.74043	-4.95435	-71.0901	-330.714
35.45	-1.40824	1.38442	-1.70707	1.94232	9.35078	-8.0061	-66.8176	-331.019
35.5	-0.797894	2.29995	-2.01225	1.02679	7.51973	-4.95435	-69.5642	-333.155
35.55	0.42281	-1.66734	-2.01225	1.63715	11.7922	-4.03882	-70.7849	-334.376
35.6	3.77974	-2.58287	-0.48637	2.55267	5.99385	-8.31128	-69.8694	-333.155
35.65	1.33834	-0.751812	3.48091	3.4682	9.96113	-5.25952	-64.071	-331.934
35.7	-1.40824	1.38442	0.734333	4.07855	7.51973	-4.34399	-65.2917	-329.798
35.75	-0.187542	1.99477	-2.31743	6.51996	7.21455	-6.7854	-68.3435	-327.967
35.8	0.42281	-0.446636	-1.09672	5.90961	10.2663	-5.86987	-66.2072	-326.136
35.85	2.55904	-1.36216	0.429157	3.4682	6.6042	-2.81812	-63.7658	-326.441
35.9	1.94869	-0.446636	2.26021	3.16303	9.65596	-7.09058	-61.3244	-326.746
35.95	-0.797894	1.38442	3.17574	1.33197	7.51973	-7.39575	-65.5969	-327.357
36	-2.32377	2.60512	1.34468	2.55267	6.6042	-2.51294	-64.6814	-325.526
36.05	-1.10307	0.774067	-2.01225	2.55267	10.5715	-5.5647	-63.7658	-324
36.1	1.03316	-0.446636	-1.4019	2.85785	5.99385	-6.7854	-60.4089	-320.643
36.15	2.86422	-0.14146	-0.48637	3.16303	8.74043	-4.95435	-60.7141	-319.117
36.2	0.42281	-0.446636	0.734333	3.4682	8.13008	-4.34399	-63.1555	-315.455
36.25	-1.10307	1.07924	2.56539	6.51996	5.99385	-7.70093	-61.3244	-315.76
36.3	0.42281	2.60512	0.429157	7.13031	9.96113	-6.17505	-57.9675	-315.76
36.35	1.33834	0.163715	-1.70707	5.60443	7.51973	-2.51294	-55.5261	-317.591
36.4	4.08492	-1.36216	-1.70707	3.4682	5.99385	-6.48022	-59.1882	-316.065
36.45	3.47457	-0.14146	0.123981	2.85785	11.487	-6.17505	-58.883	-314.539
36.5	1.03316	0.163715	1.95504	1.94232	7.21455	-3.42847	-58.5779	-313.624
36.55	0.117634	1.68959	3.78609	1.63715	6.90937	-4.95435	-56.7468	-313.319
36.6	1.03316	1.99477	3.17574	2.85785	9.96113	-6.17505	-56.4416	-311.793
36.65	3.16939	-0.751812	0.429157	3.77338	5.38349	-4.64917	-58.883	-308.436
36.7	4.39009	-1.66734	-1.09672	6.51996	6.90937	-2.51294	-59.4934	-308.741
36.75	3.16939	-1.05699	0.123981	1.63715	9.65596	-5.25952	-58.883	-309.046
36.8	-0.797894	-1.05699	-0.791546	1.33197	4.77314	-4.34399	-57.3572	-309.962
36.85	0.727985	0.468891	0.123981	2.2475	5.68867	-2.51294	-56.1364	-309.656
36.9	-0.797894	1.99477	3.48091	4.6889	10.5715	-3.12329	-58.5779	-308.741
36.95	1.64351	0.468891	3.78609	4.38373	6.90937	-5.86987	-57.6623	-306.605
37	3.16939	-1.36216	0.429157	0.721619	6.6042	-4.64917	-56.4416	-305.384
37.05	3.16939	-2.88804	-0.48637	2.2475	10.8767	-0.987061	-54.6106	-304.163
37.1	-0.492718	-1.97252	-0.791546	5.60443	7.21455	-4.34399	-52.7795	-301.722
37.15	-2.0186	-0.14146	1.03951	1.02679	7.21455	-4.64917	-54.6106	-298.975
37.2	-1.10307	1.38442	1.03951	1.02679	9.35078	-2.51294	-57.052	-298.975
37.25	-0.797894	2.60512	1.95504	5.29925	9.35078	-0.376709	-54.9157	-300.806
37.3	-0.492718	0.163715	3.48091	2.55267	6.29902	-4.03882	-53.3899	-299.28
37.35	1.03316	-1.66734	3.17574	1.63715	8.74043	-3.42847	-50.0329	-299.28
37.4	1.94869	-0.751812	1.64986	5.29925	10.2663	-1.59741	-50.3381	-298.67
37.45	-1.10307	-0.751812	-0.181194	2.2475	5.68867	-0.681885	-52.7795	-298.06
37.5	-1.71342	1.68959	-0.791546	1.94232	6.90937	-3.73364	-52.7795	-301.112
37.55	-1.71342	2.60512	-0.181194	6.21478	9.65596	-3.73364	-52.4743	-302.943
37.6	-1.10307	0.163715	0.429157	1.63715	6.6042	-1.29224	-50.0329	-301.722
37.65	1.33834	-1.66734	0.734333	2.2475	5.99385	-0.681885	-49.1174	-299.891
37.7	3.77974	-0.14146	2.26021	4.99408	10.5715	-3.42847	-51.2536	-301.722
37.75	2.86422	2.29995	3.48091	0.721619	8.43525	-3.42847	-52.7795	-300.806
37.8	0.117634	-1.36216	1.34468	3.16303	7.21455	-0.681885	-52.1692	-295.313
37.85	0.727985	-2.27769	-1.70707	4.07855	7.51973	-0.376709	-51.5588	-298.06
37.9	2.25386	0.774067	-0.791546	0.721619	9.96113	-4.03882	-48.5071	-296.534
37.95	3.77974	0.468891	0.429157	4.99408	5.99385	-3.42847	-45.4553	-291.041
38	5.30562	-1.66734	1.34468	1.02679	6.90937	-0.681885	-48.5071	-295.008
38.05	1.33834	1.07924	3.48091	1.33197	9.65596	0.538818	-50.6433	-294.398
38.1	1.64351	-0.751812	-0.181194	4.99408	6.29902	-2.81812	-50.9485	-289.21
38.15	1.94869	-0.751812	-1.70707	0.416443	5.68867	-2.51294	-50.6433	-292.567
38.2	4.39009	2.9103	-0.48637	0.721619	7.51973	-0.376709	-50.0329	-290.736
38.25	-0.187542	-0.751812	2.26021	4.07855	9.96113	1.75952	-49.7278	-286.158
38.3	-0.797894	-1.66734	-0.181194	0.721619	5.07832	-0.987061	-49.4226	-289.82
38.35	1.94869	2.60512	-1.09672	0.111267	6.6042	-2.20776	-51.864	-285.242
38.4	-0.492718	-1.97252	1.64986	3.16303	9.65596	-1.59741	-53.3899	-282.496
38.45	-0.492718	1.99477	2.26021	1.02679	9.35078	1.14917	-52.4743	-283.411
38.5	2.86422	-1.36216	-1.09672	1.33197	7.21455	-2.20776	-51.5588	-279.444
38.55	-0.187542	-0.751812	0.734333	2.55267	7.51973	-4.95435	-49.1174	-280.665
38.6	-0.492718	1.99477	3.48091	4.99408	12.0974	-4.03882	-47.8967	-279.749
38.65	3.77974	-1.05699	-0.48637	1.02679	8.13008	-2.51294	-47.2863	-275.172
38.7	-1.40824	2.60512	2.56539	2.2475	7.21455	-1.59741	-49.1174	-278.834
38.75	0.117634	-0.751812	2.26021	5.60443	7.51973	-4.64917	-51.5588	-277.918
38.8	1.64351	1.38442	1.34468	0.721619	11.487	-5.5647	-49.7278	-272.425
38.85	-0.492718	1.68959	5.61715	1.02679	8.13008	-4.03882	-49.7278	-276.697
38.9	3.47457	-1.36216	0.429157	2.55267	5.68867	-0.987061	-48.5071	-274.256
38.95	-1.40824	2.60512	1.64986	3.4682	9.35078	-1.59741	-48.2019	-269.678
39	0.42281	-2.27769	5.00679	0.721619	11.7922	-4.34399	-46.9812	-273.035
39.05	1.94869	-0.14146	1.03951	1.94232	7.21455	-3.42847	-48.2019	-272.425
39.1	-0.797894	-0.446636	2.26021	5.60443	6.90937	-0.987061	-50.6433	-268.153
39.15	4.69527	-1.97252	2.26021	2.85785	8.43525	1.45435	-50.3381	-270.594
39.2	-0.797894	1.99477	0.429157	1.33197	11.1818	-3.12329	-50.0329	-271.815
39.25	0.117634	-0.446636	5.00679	2.55267	6.29902	-3.73364	-48.5071	-269.373
39.3	0.727985	-1.05699	-0.48637	4.99408	5.99385	-2.81812	-46.9812	-270.594
39.35	-1.40824	3.52065	1.34468	1.63715	7.51973	-1.59741	-45.4553	-273.341
39.4	2.25386	-1.05699	1.95504	0.721619	10.8767	-0.681885	-47.5915	-271.815
39.45	-1.71342	1.07924	-0.181194	1.63715	7.21455	-2.20776	-47.8967	-268.458
39.5	-1.40824	2.29995	2.87056	3.4682	6.6042	-3.42847	-46.3708	-273.035
39.55	2.86422	-1.97252	-0.791546	0.721619	7.21455	-2.81812	-42.7087	-272.73
39.6	-2.0186	0.163715	-0.48637	0.416443	11.1818	-2.20776	-43.3191	-268.153
39.65	1.33834	2.60512	3.78609	2.55267	8.13008	0.538818	-46.0656	-267.542
39.7	2.55904	-2.27769	-0.48637	3.77338	7.51973	-1.90259	-44.5398	-269.068
39.75	-0.492718	-0.446636	-0.791546	1.33197	7.8249	-3.73364	-40.8777	-267.847
39.8	2.55904	1.68959	3.78609	0.721619	10.8767	-3.12329	-45.1501	-261.744
39.85	-0.187542	-2.58287	0.429157	1.94232	9.96113	-2.51294	-43.3191	-264.185
39.9	-0.187542	-0.751812	0.429157	4.6889	7.21455	0.233643	-39.3518	-264.796
39.95	2.86422	2.29995	5.00679	0.721619	7.21455	0.843994	-43.3191	-261.439
40	0.117634	-1.66734	0.734333	0.416443	9.04561	-1.29224	-43.3191	-258.692
40.05	-1.10307	-0.751812	1.03951	1.94232	11.7922	-2.81812	-37.5207	-262.049
40.1	3.77974	2.9103	3.17574	4.38373	8.43525	-1.90259	-42.4035	-262.965
40.15	1.03316	-2.27769	2.26021	1.63715	7.21455	-0.987061	-40.2673	-259.608
40.2	0.117634	-1.66734	-0.48637	1.02679	8.43525	2.0647	-39.0466	-257.471
40.25	2.86422	2.9103	2.56539	1.63715	11.7922	-1.29224	-41.488	-261.134
40.3	1.03316	-0.446636	4.09127	5.29925	11.1818	-2.20776	-37.2155	-260.523
40.35	0.727985	-1.36216	-1.09672	3.77338	7.51973	-2.81812	-41.1828	-258.082
40.4	2.86422	1.07924	0.123981	1.33197	7.8249	-2.20776	-39.0466	-255.03
40.45	2.86422	-0.446636	3.78609	2.55267	9.35078	-0.987061	-35.9948	-258.387
40.5	0.117634	-1.97252	-0.791546	3.16303	12.0974	0.538818	-40.2673	-256.556
40.55	1.94869	-0.751812	-1.09672	5.29925	8.43525	-0.071533	-36.9104	-253.809
40.6	4.39009	1.99477	0.734333	1.63715	5.99385	-2.81812	-39.657	-250.758
40.65	0.117634	-2.58287	2.26021	1.02679	7.21455	-4.03882	-39.657	-254.114
40.7	1.03316	-1.36216	-2.01225	1.94232	8.43525	-2.51294	-35.6897	-253.504
40.75	4.69527	1.99477	-0.48637	4.99408	9.96113	-0.376709	-39.657	-252.894
40.8	0.727985	-3.19322	3.17574	4.6889	7.8249	0.233643	-37.2155	-249.537
40.85	-0.797894	-2.88804	0.734333	0.721619	6.29902	2.0647	-35.3845	-252.589
40.9	2.25386	0.163715	0.123981	0.721619	6.90937	-1.59741	-36.6052	-252.589
40.95	2.55904	-1.66734	1.34468	1.33197	8.13008	-3.12329	-32.3327	-250.452
41	0.117634	-5.32945	1.95504	4.99408	10.2663	-3.12329	-35.9948	-246.485
41.05	0.727985	-2.27769	-0.791546	2.2475	9.65596	-2.81812	-35.6897	-248.011
41.1	3.16939	1.38442	0.123981	-0.499084	6.90937	-0.987061	-31.112	-248.316
41.15	-0.187542	-2.88804	4.09127	1.02679	7.21455	-0.071533	-36.3	-246.18
41.2	0.42281	-3.19322	1.95504	2.2475	8.13008	-0.376709	-35.0793	-242.518
41.25	3.16939	0.163715	-1.4019	6.21478	9.65596	-2.81812	-32.9431	-240.687
41.3	1.03316	0.163715	1.34468	4.07855	10.2663	-3.42847	-36.9104	-244.044
41.35	-0.492718	-2.58287	4.39644	1.63715	7.8249	-3.42847	-36.6052	-243.128
41.4	1.33834	-1.66734	0.734333	2.2475	6.90937	0.538818	-32.3327	-240.992
41.45	3.77974	1.99477	-0.791546	4.38373	6.6042	-0.987061	-37.8259	-237.94
41.5	-0.492718	0.163715	1.64986	7.13031	8.43525	-4.34399	-36.3	-239.161
41.55	0.117634	-0.14146	4.70162	4.6889	11.1818	-3.12329	-31.112	-241.602
41.6	3.77974	1.38442	0.429157	1.63715	9.35078	0.233643	-35.3845	-239.771
41.65	3.16939	3.52065	-0.48637	1.33197	6.29902	-1.29224	-35.6897	-236.109
41.7	-0.187542	-0.446636	1.03951	3.77338	6.29902	-3.73364	-32.6379	-233.668
41.75	1.33834	-0.751812	2.56539	4.99408	7.51973	-0.376709	-34.7741	-236.414
41.8	4.69527	1.68959	-1.70707	5.29925	7.8249	-0.681885	-36.3	-236.414
41.85	1.64351	2.29995	-2.01225	2.55267	10.5715	-2.51294	-32.9431	-233.668
41.9	-0.492718	-1.36216	-0.791546	2.55267	8.43525	-0.681885	-31.4172	-230.006
41.95	1.33834	-1.97252	2.26021	1.63715	6.29902	-1.90259	-32.9431	-228.785
42	4.39009	0.163715	-2.6226	4.38373	4.46797	-2.81812	-32.0276	-230.921
42.05	-0.187542	-0.14146	-3.53813	7.13031	5.99385	0.843994	-28.0603	-231.531
42.1	-1.71342	-2.27769	-0.181194	5.29925	6.6042	-4.03882	-31.7224	-229.7
42.15	0.42281	-0.14146	3.48091	2.55267	8.74043	-3.12329	-31.7224	-226.954
42.2	3.16939	2.60512	-0.181194	2.2475	7.8249	-0.376709	-28.0603	-224.818
42.25	-2.0186	0.163715	-2.01225	4.6889	5.99385	-3.42847	-30.5017	-226.954
42.3	-1.71342	-1.36216	0.123981	5.60443	5.38349	1.45435	-32.6379	-226.343
42.35	0.42281	-0.446636	3.17574	6.82513	5.38349	-3.12329	-30.5017	-224.512
42.4	3.16939	2.29995	1.34468	4.99408	5.38349	-0.681885	-27.7551	-222.987
42.45	-1.10307	2.29995	-1.09672	1.94232	7.21455	-0.071533	-31.112	-219.324
42.5	-0.187542	-1.97252	-1.70707	1.63715	9.65596	-1.29224	-30.5017	-221.156
42.55	1.94869	-0.14146	1.03951	1.94232	9.96113	3.2854	-26.8396	-223.292
42.6	4.08492	1.99477	2.87056	2.85785	7.21455	-2.81812	-27.4499	-223.597
42.65	0.117634	3.21547	-2.01225	3.4682	5.99385	-0.071533	-30.1965	-221.461
42.7	0.727985	-1.05699	-1.70707	4.6889	5.99385	-0.071533	-28.6706	-219.019
42.75	2.25386	-0.751812	0.123981	1.94232	7.21455	-2.20776	-24.7033	-217.188
42.8	4.69527	1.07924	3.17574	0.416443	9.65596	2.0647	-28.6706	-220.545
42.85	1.03316	3.21547	0.123981	1.33197	9.35078	-2.81812	-28.9758	-220.545
42.9	1.03316	-0.14146	-2.01225	2.85785	5.68867	0.538818	-28.0603	-218.104
42.95	1.94869	-0.14146	-0.48637	4.07855	6.6042	-1.29224	-26.2292	-216.883
43	4.39009	0.774067	1.64986	4.6889	9.65596	-3.12329	-30.1965	-214.442
43.05	1.64351	2.29995	3.48091	4.38373	10.2663	1.14917	-30.8069	-214.747
43.1	0.42281	0.774067	0.429157	2.55267	6.29902	-3.12329	-27.4499	-215.662
43.15	0.42281	-1.97252	0.123981	1.33197	6.6042	-3.12329	-26.5344	-216.273
43.2	3.16939	-1.36216	0.734333	1.33197	9.65596	0.538818	-30.5017	-214.442
43.25	3.77974	-0.446636	2.26021	1.33197	6.6042	-3.12329	-29.5862	-213.526
43.3	0.42281	1.68959	3.78609	3.16303	5.99385	-1.90259	-26.8396	-210.169
43.35	-0.492718	-1.05699	0.734333	4.38373	8.43525	0.233643	-25.3137	-208.948
43.4	1.33834	-2.27769	-0.48637	4.38373	6.90937	-4.03882	-30.5017	-210.474
43.45	4.69527	-1.36216	-0.48637	2.2475	4.77314	-0.681885	-29.281	-210.78
43.5	1.33834	0.774067	1.64986	1.02679	9.35078	0.843994	-27.1447	-209.864
43.55	-0.492718	1.38442	3.48091	0.111267	5.68867	-3.42847	-26.8396	-208.643
43.6	-0.187542	-1.05699	0.123981	1.02679	6.90937	-0.987061	-29.281	-206.812
43.65	3.16939	-1.66734	-0.791546	0.721619	9.65596	1.75952	-29.5862	-204.676
43.7	4.39009	-1.05699	0.429157	2.85785	5.07832	-2.20776	-27.1447	-204.676
43.75	0.727985	1.68959	1.03951	4.38373	9.65596	-0.681885	-26.5344	-205.897
43.8	-0.187542	1.99477	3.78609	5.29925	7.21455	2.67505	-28.9758	-206.202
43.85	0.117634	-1.97252	3.17574	4.07855	6.90937	-2.51294	-29.281	-204.981
43.9	2.25386	-2.27769	-1.09672	1.94232	9.04561	-0.681885	-26.8396	-204.066
43.95	3.16939	-1.97252	0.123981	1.33197	5.38349	2.98022	-25.6189	-200.404
44	0.42281	0.774067	1.03951	1.94232	9.35078	-1.90259	-29.5862	-197.352
44.05	-1.40824	2.29995	3.48091	2.55267	6.29902	-1.59741	-28.6706	-197.962
44.1	-0.187542	-2.58287	2.87056	2.2475	7.51973	3.2854	-27.7551	-198.267
44.15	2.55904	-1.97252	0.734333	3.4682	8.43525	-0.376709	-25.6189	-201.014
44.2	3.47457	-1.97252	-0.48637	4.6889	5.99385	-1.29224	-28.6706	-201.014
44.25	-0.492718	0.468891	-0.48637	5.29925	9.65596	0.843994	-30.1965	-201.624
44.3	0.117634	0.774067	-0.181194	4.99408	4.77314	0.538818	-29.8913	-201.319
44.35	0.727985	-2.58287	1.95504	3.16303	5.68867	-1.29224	-26.2292	-200.404
44.4	1.64351	-2.88804	2.26021	1.02679	8.74043	0.233643	-27.1447	-199.183
44.45	5.00045	-2.58287	-0.791546	-0.193909	4.77314	2.67505	-30.8069	-198.572
44.5	1.33834	-1.66734	-2.6226	-0.193909	6.90937	0.233643	-29.8913	-198.572
44.55	-0.492718	0.468891	-2.31743	0.721619	6.29902	0.233643	-28.0603	-198.267
44.6	-0.187542	1.07924	0.734333	0.416443	5.07832	3.2854	-24.3982	-197.657
44.65	1.03316	-1.36216	1.34468	0.416443	9.65596	0.233643	-28.0603	-195.826
44.7	3.16939	-1.97252	2.56539	1.94232	5.07832	-0.071533	-29.281	-194.91
44.75	3.16939	-2.27769	0.429157	4.07855	5.07832	1.45435	-29.5862	-191.859
44.8	0.117634	0.774067	-1.09672	4.6889	9.65596	0.843994	-25.0085	-190.638
44.85	-1.40824	2.9103	0.123981	1.63715	5.38349	-2.20776	-24.7033	-189.722
44.9	-0.187542	1.07924	0.429157	0.721619	5.07832	-0.681885	-28.3655	-188.807
44.95	0.117634	-0.751812	1.95504	-0.193909	9.35078	3.59058	-28.6706	-190.028
45	1.64351	-2.27769	3.17574	1.94232	4.77314	-0.681885	-28.6706	-190.028
45.05	-0.187542	-0.446636	2.26021	2.55267	5.99385	-0.987061	-26.5344	-191.248
45.1	-1.10307	0.163715	0.123981	4.6889	10.2663	0.843994	-24.7033	-189.722
45.15	-1.71342	2.60512	-1.70707	1.94232	5.38349	3.2854	-27.4499	-190.028
45.2	-1.71342	1.38442	-0.791546	1.33197	5.38349	-0.071533	-28.0603	-187.891
45.25	0.117634	-0.14146	-0.48637	1.94232	9.65596	0.233643	-26.2292	-186.365
45.3	2.55904	-1.66734	1.64986	4.6889	5.99385	3.59058	-23.4826	-185.755
45.35	3.16939	-0.446636	2.26021	4.07855	6.29902	2.0647	-21.6516	-183.924
45.4	0.727985	0.163715	2.56539	1.33197	8.74043	-0.987061	-23.7878	-182.703
45.45	-0.797894	1.68959	-0.48637	3.16303	6.29902	-1.29224	-25.924	-183.924
45.5	-0.492718	4.131	-2.6226	4.38373	5.68867	2.98022	-23.4826	-185.755
45.55	1.03316	2.29995	-2.31743	1.33197	6.6042	-0.376709	-23.4826	-185.145
45.6	2.25386	-0.14146	-2.6226	2.2475	7.8249	-0.987061	-20.7361	-183.619
45.65	4.08492	-1.36216	-0.48637	5.29925	4.46797	0.233643	-21.6516	-181.483
45.7	2.25386	-0.751812	0.123981	-0.193909	5.99385	3.2854	-24.093	-178.126
45.75	-0.492718	-1.36216	1.64986	2.55267	7.21455	-0.071533	-24.3982	-180.567
45.8	-1.40824	0.774067	0.734333	5.90961	3.85762	-0.987061	-23.1775	-181.483
45.85	-1.71342	1.99477	-0.48637	0.721619	4.46797	0.538818	-20.7361	-180.872
45.9	-0.492718	-2.27769	-1.70707	3.16303	8.43525	1.75952	-20.1257	-178.126
45.95	1.33834	-3.49839	-2.31743	3.16303	4.77314	-1.59741	-22.8723	-180.567
46	1.33834	-0.751812	-1.4019	2.55267	3.55244	-0.681885	-25.3137	-181.788
46.05	1.33834	2.29995	-1.09672	4.38373	7.51973	1.14917	-23.1775	-179.652
46.1	-0.797894	-0.751812	0.123981	2.55267	7.8249	2.67505	-23.1775	-177.21
46.15	-0.492718	-1.36216	1.95504	1.02679	4.16279	-0.376709	-21.9568	-180.872
46.2	-0.797894	0.774067	1.03951	7.43549	5.38349	0.843994	-21.0412	-179.652
46.25	0.727985	1.38442	-1.70707	1.33197	9.35078	2.0647	-22.5671	-174.769
46.3	3.47457	-1.36216	-2.6226	2.2475	5.68867	3.89575	-24.3982	-179.346
46.35	1.33834	0.163715	-1.70707	4.99408	5.68867	-0.376709	-24.3982	-177.21
46.4	-1.10307	1.68959	-1.09672	0.416443	7.8249	-0.071533	-23.4826	-173.853
46.45	0.727985	-2.58287	1.34468	1.94232	7.51973	1.45435	-22.2619	-179.041
46.5	2.86422	0.774067	-1.09672	4.99408	5.07832	4.20093	-18.5998	-176.6
46.55	1.03316	-0.14146	-1.70707	1.02679	5.99385	0.538818	-19.2102	-175.989
46.6	-1.10307	-2.58287	-0.48637	2.85785	9.65596	-0.681885	-22.2619	-179.652
46.65	1.03316	2.29995	3.17574	5.90961	6.29902	-0.376709	-22.2619	-176.6
46.7	2.86422	-2.88804	-1.09672	1.33197	5.38349	1.75952	-21.6516	-179.346
46.75	-1.40824	-0.446636	-0.48637	1.63715	6.90937	1.14917	-20.1257	-180.567
46.8	0.117634	-1.36216	2.87056	5.90961	8.74043	-2.51294	-21.0412	-175.684
46.85	2.55904	-2.58287	-0.181194	2.55267	4.77314	-1.59741	-19.8205	-178.736
46.9	-1.10307	2.60512	-1.70707	1.94232	4.77314	-0.987061	-21.0412	-177.821
46.95	2.25386	-2.58287	2.26021	3.77338	7.8249	0.843994	-23.4826	-175.074
47	0.727985	-0.14146	-1.4019	3.77338	7.8249	-1.90259	-25.3137	-178.431
47.05	-0.492718	-0.751812	-1.70707	1.94232	3.85762	-3.12329	-23.7878	-174.464
47.1	3.47457	-1.97252	3.17574	2.85785	5.99385	-2.51294	-24.3982	-172.327
47.15	-1.40824	2.29995	-1.4019	4.99408	7.8249	0.233643	-22.5671	-176.6
47.2	1.03316	-2.88804	-0.181194	1.33197	6.6042	0.538818	-21.0412	-173.853
47.25	2.25386	-0.14146	1.34468	1.94232	3.85762	-2.20776	-21.0412	-171.412
47.3	-0.492718	-1.36216	-1.09672	4.38373	5.68867	-1.90259	-22.2619	-174.158
47.35	3.77974	-1.05699	3.17574	4.38373	9.04561	-0.681885	-23.4826	-172.938
47.4	0.117634	1.68959	-0.48637	1.33197	6.90937	3.59058	-23.4826	-169.276
47.45	1.33834	-2.27769	0.123981	2.85785	4.46797	2.67505	-21.9568	-174.158
47.5	2.25386	0.468891	3.78609	6.21478	5.99385	-0.376709	-20.7361	-172.022
47.55	-1.10307	0.468891	-0.791546	4.38373	8.74043	1.14917	-17.9895	-168.055
47.6	5.6108	-1.66734	2.26021	1.63715	7.21455	1.75952	-16.1584	-172.633
47.65	-0.492718	1.38442	0.429157	1.94232	4.46797	4.20093	-17.3791	-172.938
47.7	1.64351	-1.36216	-0.791546	5.29925	3.55244	2.0647	-19.8205	-170.191
47.75	1.94869	-1.66734	2.87056	3.16303	6.6042	-0.681885	-18.905	-170.496
47.8	-0.797894	2.60512	-0.791546	1.02679	6.90937	-0.071533	-16.4636	-173.548
47.85	4.08492	-2.88804	-1.09672	1.94232	3.55244	0.538818	-14.6325	-171.107
47.9	-0.187542	-1.36216	3.17574	5.90961	3.55244	2.98022	-18.5998	-166.529
47.95	-0.187542	1.99477	-2.01225	3.16303	6.29902	2.0647	-19.2102	-170.191
48	2.86422	-1.36216	0.123981	0.416443	8.74043	0.233643	-16.1584	-170.191
48.05	-0.492718	-1.36216	1.95504	2.2475	3.85762	-0.681885	-15.5481	-167.139
48.1	0.727985	3.82583	-1.4019	5.29925	4.16279	1.45435	-18.905	-165.919
48.15	3.16939	-0.446636	0.123981	3.77338	5.68867	2.0647	-17.0739	-169.581
48.2	-0.492718	0.163715	3.17574	1.33197	8.13008	3.2854	-13.4118	-168.665
48.25	1.64351	3.82583	-0.791546	1.94232	5.99385	0.538818	-18.905	-165.003
48.3	4.08492	-0.751812	-0.791546	4.6889	3.85762	-0.987061	-18.2947	-164.698
48.35	0.727985	0.163715	5.00679	3.4682	5.38349	-0.376709	-14.6325	-167.139
48.4	2.25386	4.131	0.123981	0.111267	6.90937	-0.987061	-20.4309	-165.003
48.45	4.08492	-0.14146	-0.48637	0.111267	8.13008	2.67505	-18.905	-161.951
48.5	-0.492718	-0.751812	2.87056	3.4682	4.77314	1.75952	-17.3791	-164.088
48.55	1.33834	2.9103	1.34468	4.38373	5.07832	-0.987061	-19.8205	-164.393
48.6	2.86422	1.07924	0.734333	0.721619	5.38349	-0.987061	-16.4636	-161.646
48.65	-1.10307	-1.36216	2.87056	1.33197	7.51973	0.233643	-19.2102	-158.594
48.7	0.117634	0.774067	3.17574	3.16303	6.29902	1.14917	-20.1257	-160.426
48.75	3.47457	1.99477	-0.48637	5.60443	3.55244	4.5061	-15.8532	-160.731
48.8	-1.40824	-1.05699	1.64986	2.85785	5.07832	2.98022	-19.5154	-157.984
48.85	0.117634	-0.446636	3.78609	0.111267	5.68867	0.538818	-17.0739	-154.627
48.9	4.08492	2.9103	0.123981	1.33197	7.8249	-0.681885	-17.6843	-158.289
48.95	0.117634	-1.36216	-0.791546	4.38373	5.99385	0.233643	-19.2102	-158.9
49	-1.10307	-1.05699	2.26021	4.6889	4.46797	1.45435	-12.8015	-157.374
49.05	1.33834	2.9103	2.87056	1.94232	5.68867	2.98022	-18.5998	-154.932
49.1	1.33834	-0.14146	-1.09672	1.63715	5.38349	4.20093	-16.7688	-157.984
49.15	-1.40824	-0.446636	0.123981	3.77338	8.74043	2.67505	-15.2429	-160.12
49.2	0.42281	1.99477	4.39644	5.60443	7.21455	-0.987061	-17.9895	-159.815
49.25	2.55904	3.82583	0.429157	3.16303	5.68867	-0.071533	-13.717	-157.374
49.3	-0.492718	-1.66734	-1.09672	0.416443	5.38349	-0.071533	-16.1584	-158.9
49.35	-0.187542	0.163715	0.734333	1.63715	6.6042	1.45435	-16.7688	-161.646
49.4	3.77974	3.21547	2.56539	2.55267	8.43525	2.98022	-11.886	-160.731
49.45	0.727985	0.163715	-2.6226	4.99408	9.04561	5.11646	-16.4636	-157.679
49.5	0.117634	-1.05699	-2.92778	3.4682	4.77314	3.2854	-17.3791	-157.069
49.55	2.86422	0.774067	0.123981	1.63715	4.46797	1.45435	-12.8015	-160.12
49.6	3.47457	2.60512	0.429157	1.33197	5.68867	0.233643	-17.3791	-159.205
49.65	-0.187542	-1.05699	-2.92778	2.2475	6.6042	2.0647	-17.3791	-157.374
49.7	0.117634	-0.751812	-1.4019	4.07855	7.8249	4.81128	-14.9377	-152.796
49.75	5.00045	2.9103	1.95504	3.4682	5.99385	1.14917	-19.5154	-154.322
49.8	0.727985	1.68959	0.429157	-0.193909	4.46797	-2.20776	-19.2102	-154.017
49.85	-0.797894	-0.751812	-1.09672	-0.193909	4.77314	-1.29224	-15.2429	-152.796
49.9	0.42281	0.163715	-0.791546	0.416443	5.07832	2.67505	-19.8205	-149.744
49.95	3.16939	4.131	3.17574	4.38373	6.29902	-0.071533	-19.5154	-147.608
50	-2.0186	-0.751812	0.429157	3.4682	8.43525	-0.987061	-15.2429	-148.829
50.05	-2.0186	-1.36216	-1.4019	-0.193909	6.90937	2.0647	-16.7688	-149.744
50.1	2.25386	1.07924	0.734333	0.721619	4.77314	1.75952	-18.905	-147.608
50.15	2.55904	2.9103	4.09127	0.416443	4.46797	-0.681885	-17.0739	-145.472
50.2	-0.797894	-2.27769	1.64986	2.85785	4.16279	2.98022	-15.8532	-143.336
50.25	0.727985	-1.36216	-0.181194	5.29925	7.51973	0.843994	-18.905	-145.167
50.3	4.08492	1.68959	1.34468	2.2475	9.65596	0.233643	-18.905	-146.082
50.35	2.86422	2.60512	3.78609	-1.10944	7.8249	3.89575	-15.5481	-143.946
50.4	-0.187542	-1.36216	2.56539	-0.193909	5.68867	0.843994	-19.2102	-142.42
50.45	0.727985	-1.05699	0.123981	1.33197	5.68867	0.538818	-19.5154	-142.115
50.5	3.77974	1.99477	1.03951	2.85785	6.6042	3.59058	-16.4636	-147.303
50.55	1.33834	1.99477	2.56539	4.38373	6.90937	-0.376709	-17.6843	-147.303
50.6	-0.187542	-0.751812	2.56539	2.85785	7.51973	3.2854	-19.2102	-146.387
50.65	0.42281	-1.36216	-1.09672	0.416443	9.96113	-0.987061	-17.6843	-144.556
50.7	3.77974	0.774067	-1.09672	-0.193909	7.21455	-0.376709	-13.717	-143.336
50.75	0.727985	1.07924	0.429157	1.63715	4.16279	2.98022	-18.2947	-145.777
50.8	-0.187542	-1.97252	2.26021	2.85785	4.77314	-1.29224	-18.2947	-146.082
50.85	0.42281	-1.36216	-0.48637	4.99408	5.68867	2.67505	-14.9377	-144.862
50.9	4.08492	0.468891	-1.70707	2.85785	5.68867	-2.81812	-14.9377	-143.336
50.95	1.33834	1.38442	-1.09672	-0.193909	6.29902	-0.071533	-19.5154	-140.589
51	-0.492718	-1.66734	1.03951	0.416443	7.8249	-0.681885	-18.2947	-140.894
51.05	-0.797894	-1.66734	1.34468	1.33197	5.38349	-1.59741	-13.717	-142.42
51.1	2.55904	-0.751812	-1.70707	1.02679	3.24727	2.0647	-17.3791	-142.42
51.15	1.64351	1.38442	-1.70707	2.85785	4.16279	-1.59741	-19.5154	-140.589
51.2	-1.10307	-1.05699	-0.48637	4.38373	5.07832	0.538818	-18.905	-139.063
51.25	-1.10307	-2.58287	2.26021	2.2475	8.74043	2.0647	-15.2429	-136.622
51.3	1.33834	-2.27769	-0.791546	-0.499084	4.77314	-0.987061	-18.5998	-138.148
51.35	2.55904	-0.446636	-2.01225	-0.193909	4.77314	4.20093	-18.2947	-140.284
51.4	-2.0186	0.163715	-0.48637	0.721619	5.99385	0.843994	-14.9377	-140.284
51.45	-0.797894	-3.49839	1.03951	2.55267	8.43525	0.843994	-13.717	-139.368
51.5	0.42281	-2.58287	2.56539	4.38373	4.77314	4.81128	-16.1584	-137.843
51.55	3.16939	-0.751812	-0.48637	4.6889	5.99385	-0.987061	-15.5481	-136.317
51.6	0.117634	1.68959	-2.31743	4.38373	9.65596	0.538818	-12.1911	-137.843
51.65	-1.40824	-0.751812	-1.4019	2.55267	5.68867	3.89575	-11.886	-139.979
51.7	-0.492718	-2.58287	0.123981	1.94232	5.68867	-2.20776	-14.6325	-138.758
51.75	1.94869	-1.05699	2.56539	2.55267	10.5715	0.538818	-13.4118	-139.063
51.8	1.64351	-0.14146	-2.31743	2.55267	5.99385	2.98022	-10.9704	-137.537
51.85	-1.40824	1.68959	-2.31743	3.77338	6.90937	-1.29224	-9.44455	-135.401
51.9	-0.492718	-1.97252	-2.31743	3.77338	9.04561	-0.376709	-13.717	-135.401
51.95	0.117634	-1.66734	1.03951	4.6889	5.68867	1.14917	-12.4963	-139.063
52	4.39009	-2.88804	1.64986	4.07855	8.43525	-2.51294	-11.886	-140.589
52.05	1.94869	-0.14146	-1.4019	2.55267	5.38349	-1.29224	-11.2756	-137.843
52.1	-1.40824	0.774067	-1.09672	1.33197	5.07832	1.45435	-15.2429	-137.843
52.15	-0.492718	-1.05699	-1.4019	0.416443	7.8249	-3.42847	-14.6325	-136.622
52.2	1.33834	-2.88804	-0.48637	0.721619	3.24727	-1.29224	-14.0222	-135.401
52.25	4.39009	-2.27769	1.34468	1.94232	6.90937	1.75952	-12.1911	-134.791
52.3	-0.797894	1.07924	1.95504	2.85785	4.16279	-3.12329	-14.9377	-136.317
52.35	-1.40824	2.29995	-1.09672	3.4682	3.85762	-2.20776	-14.9377	-138.148
52.4	-2.0186	-0.14146	-1.70707	4.6889	6.6042	2.67505	-13.717	-138.453
52.45	0.42281	-2.58287	-1.09672	4.38373	2.33174	-1.90259	-11.2756	-136.927
52.5	1.03316	-0.751812	0.734333	3.16303	8.13008	-2.20776	-13.4118	-135.096
52.55	0.42281	0.163715	2.87056	1.63715	4.16279	1.14917	-14.9377	-133.265
52.6	-1.71342	2.29995	1.34468	1.63715	4.77314	-0.987061	-14.0222	-130.213
52.65	-0.797894	0.468891	-1.4019	1.63715	5.99385	-2.51294	-11.886	-132.044
52.7	-0.187542	-2.58287	-2.01225	3.16303	3.55244	-0.071533	-11.5808	-132.96
52.75	1.94869	-1.05699	-1.09672	1.94232	8.74043	0.843994	-14.9377	-132.655
52.8	2.86422	-0.751812	0.734333	2.55267	5.07832	-2.51294	-14.6325	-132.655
52.85	0.117634	1.99477	2.56539	3.4682	5.68867	-0.987061	-13.717	-130.518
52.9	0.117634	2.9103	1.95504	4.99408	9.04561	3.2854	-12.4963	-129.298
52.95	0.117634	0.774067	-0.181194	5.29925	5.07832	-2.51294	-12.8015	-126.551
53	2.55904	-0.14146	0.123981	4.07855	6.90937	-1.29224	-14.9377	-124.11
53.05	4.69527	-0.14146	0.123981	2.55267	7.8249	1.75952	-14.6325	-123.499
53.1	2.55904	1.07924	1.95504	1.02679	4.16279	0.538818	-12.1911	-124.72
53.15	0.42281	1.68959	3.78609	1.33197	6.6042	-1.90259	-10.0549	-125.635
53.2	0.117634	2.9103	5.31197	0.721619	6.6042	1.45435	-12.4963	-126.551
53.25	1.33834	-1.36216	1.95504	1.94232	3.55244	4.5061	-14.9377	-125.025
53.3	4.39009	-2.27769	0.123981	2.85785	5.68867	-0.071533	-13.1067	-122.584
53.35	4.69527	-1.36216	0.123981	4.99408	5.38349	-0.071533	-11.2756	-121.973
53.4	2.55904	-1.66734	0.429157	1.02679	3.55244	3.89575	-9.44455	-120.447
53.45	0.117634	0.163715	0.429157	0.111267	5.07832	2.98022	-11.886	-119.227
53.5	0.42281	2.60512	0.734333	2.2475	5.38349	0.538818	-14.0222	-116.48
53.55	0.42281	1.07924	4.70162	4.07855	3.55244	1.14917	-12.1911	-116.175
53.6	2.55904	-1.66734	1.95504	3.16303	5.99385	3.2854	-10.6653	-117.701
53.65	4.39009	-2.27769	-0.791546	-0.499084	5.99385	0.843994	-9.13938	-117.701
53.7	1.64351	-2.27769	-1.4019	1.63715	2.63691	-0.071533	-10.9704	-117.091
53.75	-1.71342	0.163715	0.734333	5.60443	4.16279	2.67505	-12.4963	-116.175
53.8	-0.492718	1.99477	1.34468	1.33197	7.51973	3.2854	-11.886	-115.565
53.85	0.727985	1.99477	1.95504	1.02679	2.02656	0.233643	-10.9704	-114.039
53.9	1.94869	-1.05699	3.78609	4.38373	4.16279	1.75952	-8.8342	-112.208
53.95	2.25386	-2.27769	2.87056	3.16303	8.13008	3.59058	-8.8342	-111.292
54	3.77974	-2.27769	0.429157	1.94232	4.16279	3.2854	-12.1911	-113.734
54.05	1.33834	-1.36216	-1.4019	4.07855	4.46797	-0.681885	-12.1911	-114.649
54.1	-0.797894	1.07924	-0.791546	1.33197	8.43525	0.233643	-12.1911	-112.818
54.15	-1.10307	1.38442	-1.09672	0.416443	5.68867	3.89575	-11.5808	-110.682
54.2	-1.10307	-0.446636	-0.48637	4.07855	4.77314	1.14917	-8.22385	-109.461
54.25	-0.187542	-2.27769	0.734333	0.416443	7.51973	-0.376709	-10.3601	-114.649
54.3	2.25386	-1.36216	1.64986	-0.193909	6.6042	1.14917	-12.4963	-113.123
54.35	3.77974	0.774067	3.78609	4.38373	4.16279	4.5061	-12.4963	-110.072
54.4	0.727985	1.07924	1.95504	1.02679	4.16279	0.538818	-11.2756	-113.734
54.45	-0.797894	-1.97252	0.123981	2.85785	8.43525	-0.681885	-8.52903	-116.48
54.5	0.117634	-1.97252	-0.791546	4.6889	3.55244	-0.987061	-7.00315	-114.344
54.55	1.33834	2.9103	0.429157	1.63715	4.16279	2.98022	-9.13938	-114.649
54.6	3.16939	-0.446636	1.34468	4.99408	6.90937	-0.987061	-10.0549	-116.785
54.65	4.08492	-1.05699	4.09127	3.16303	6.6042	-2.81812	-10.9704	-113.734
54.7	0.727985	1.99477	2.26021	1.63715	2.94209	-0.987061	-11.886	-116.48
54.75	0.727985	-1.36216	-1.09672	5.29925	5.38349	2.36987	-11.2756	-115.26
54.8	1.33834	-1.36216	0.123981	1.63715	9.65596	2.0647	-8.52903	-111.292
54.85	3.77974	2.9103	0.734333	0.416443	4.46797	-1.90259	-9.44455	-114.954
54.9	-0.187542	-2.27769	3.17574	4.07855	4.77314	0.233643	-12.1911	-115.26
54.95	0.42281	-1.05699	-0.48637	1.63715	6.29902	2.67505	-14.0222	-109.766
55	2.86422	1.68959	-0.48637	0.721619	7.51973	4.20093	-12.8015	-113.734
55.05	0.117634	-2.27769	2.26021	4.99408	2.94209	0.843994	-11.2756	-112.208
55.1	-0.492718	2.60512	1.64986	1.63715	3.85762	1.14917	-9.44455	-109.766
55.15	2.25386	-2.27769	-0.48637	1.02679	6.29902	2.98022	-6.69797	-113.428
55.2	-1.40824	-0.14146	1.95504	3.4682	5.38349	5.42163	-7.00315	-109.766
55.25	-1.40824	1.07924	3.17574	4.6889	3.55244	3.2854	-8.52903	-110.987
55.3	4.39009	-2.58287	0.429157	0.111267	4.46797	0.843994	-10.9704	-112.513
55.35	-1.71342	1.38442	2.87056	1.33197	7.8249	2.98022	-9.74973	-108.546
55.4	-0.187542	-3.49839	2.26021	5.90961	3.85762	4.81128	-10.3601	-111.903
55.45	1.94869	-0.751812	-0.181194	1.94232	5.38349	5.11646	-8.52903	-112.208
55.5	-1.40824	-1.05699	4.70162	1.94232	6.29902	0.233643	-7.30832	-109.766
55.55	3.47457	-2.88804	0.123981	2.85785	8.43525	-0.071533	-6.3928	-112.513
55.6	-0.797894	1.99477	1.34468	4.38373	4.16279	0.233643	-7.6135	-111.903
55.65	0.42281	-3.19322	4.09127	1.63715	4.46797	2.67505	-9.44455	-107.02
55.7	1.94869	0.774067	0.123981	0.721619	7.51973	-0.071533	-8.8342	-110.072
55.75	-1.10307	-0.751812	2.56539	4.6889	7.8249	-2.20776	-9.74973	-110.682
55.8	3.16939	-1.36216	0.734333	2.55267	4.77314	-1.90259	-8.52903	-105.494
55.85	-2.0186	2.9103	-0.181194	1.02679	4.46797	-1.59741	-7.91867	-105.799
55.9	-0.492718	-1.97252	5.00679	2.85785	6.90937	1.75952	-5.78244	-107.02
55.95	0.727985	-1.05699	-1.70707	6.82513	6.6042	0.538818	-6.69797	-103.968
56	-1.71342	1.07924	0.429157	2.2475	3.55244	-2.51294	-10.6653	-100.001
56.05	1.03316	-3.19322	3.17574	2.2475	4.16279	-1.90259	-10.3601	-105.189
56.1	-1.71342	-1.66734	-0.48637	3.16303	6.29902	-0.376709	-10.0549	-103.358
56.15	-1.10307	-1.36216	3.78609	5.29925	7.51973	3.2854	-7.30832	-98.78
56.2	2.55904	-3.80357	-0.181194	1.02679	4.46797	1.45435	-7.91867	-100.916
56.25	-2.62895	-0.14146	0.123981	1.02679	5.68867	-2.51294	-9.74973	-100.306
56.3	0.727985	-1.05699	5.00679	2.85785	6.6042	-2.20776	-8.52903	-98.4748
56.35	0.117634	-2.58287	-0.181194	3.16303	9.04561	-1.59741	-6.08762	-96.0334
56.4	-2.32377	-1.05699	0.734333	1.02679	5.99385	0.843994	-6.69797	-100.306
56.45	-0.492718	-1.66734	4.39644	1.02679	5.38349	0.538818	-9.13938	-98.78
56.5	-2.93412	-3.49839	-0.181194	2.55267	5.99385	-1.90259	-7.30832	-96.3386
56.55	-3.54448	-0.751812	-0.48637	4.38373	7.8249	-1.90259	-6.69797	-96.949
56.6	-0.187542	-0.751812	4.09127	1.02679	7.8249	-0.681885	-9.74973	-100.001
56.65	-2.93412	-3.49839	-0.791546	1.63715	4.77314	1.75952	-8.22385	-99.3904
56.7	-3.84965	0.163715	-0.48637	3.4682	5.38349	2.98022	-6.3928	-95.1179
56.75	0.727985	1.07924	2.56539	5.60443	7.21455	2.0647	-8.52903	-97.8645
56.8	-1.71342	-3.80357	0.429157	2.2475	9.35078	0.233643	-4.86692	-99.3904
56.85	-2.0186	-0.751812	-1.4019	1.94232	6.29902	0.843994	-7.6135	-97.8645
56.9	0.727985	1.07924	1.34468	2.85785	5.38349	1.45435	-7.91867	-93.8972
56.95	-0.797894	-2.58287	1.95504	5.60443	7.21455	3.2854	-3.95139	-97.5593
57	-1.40824	-1.36216	-2.31743	2.55267	8.74043	4.5061	-8.8342	-96.949
57.05	0.727985	1.99477	-0.791546	0.416443	9.65596	1.75952	-5.78244	-95.4231
57.1	1.33834	-1.97252	2.26021	1.02679	5.99385	-0.681885	-5.78244	-91.761
57.15	-2.0186	-1.97252	-1.70707	1.94232	6.29902	-0.376709	-7.00315	-96.3386
57.2	0.42281	1.07924	-2.92778	3.77338	5.99385	-0.376709	-3.34104	-97.2541
57.25	3.47457	-1.36216	0.429157	0.111267	8.13008	1.14917	-7.91867	-95.7283
57.3	-1.71342	-3.19322	0.429157	-0.80426	7.21455	2.67505	-5.17209	-92.9817
57.35	-0.797894	-0.14146	-1.4019	0.416443	4.16279	0.233643	-3.95139	-95.7283
57.4	4.08492	1.07924	-0.48637	3.16303	3.85762	-1.90259	-6.69797	-97.8645
57.45	-0.492718	-3.19322	3.48091	1.33197	4.77314	-2.20776	-3.03586	-95.1179
57.5	-2.0186	-1.66734	-0.48637	-0.80426	7.51973	-1.90259	-6.69797	-91.1506
57.55	1.33834	2.29995	0.123981	0.111267	6.6042	-0.681885	-7.00315	-91.4558
57.6	0.42281	-1.66734	1.95504	1.94232	3.85762	0.538818	-3.34104	-92.0661
57.65	-1.71342	-2.27769	2.56539	4.99408	3.55244	3.2854	-9.13938	-90.8454
57.7	0.117634	1.07924	-1.4019	1.94232	4.77314	1.75952	-6.3928	-86.8782
57.75	2.25386	0.468891	-0.181194	1.33197	7.21455	-0.681885	-4.56174	-84.4368
57.8	-2.0186	-2.88804	3.78609	1.63715	7.51973	-0.987061	-8.8342	-87.4885
57.85	-1.71342	-1.36216	1.34468	3.4682	4.77314	0.233643	-6.3928	-87.1833
57.9	1.33834	1.99477	-1.70707	4.38373	2.94209	1.75952	-5.17209	-84.4368
57.95	-1.71342	-1.36216	1.03951	1.94232	3.85762	3.59058	-7.6135	-79.8591
58	-2.32377	-2.88804	4.70162	1.02679	6.90937	-0.376709	-5.47727	-83.5212
58.05	-1.71342	-0.446636	0.123981	0.721619	9.04561	-1.29224	-4.56174	-84.4368
58.1	1.94869	0.468891	-0.791546	3.77338	5.38349	-0.071533	-7.30832	-81.9953
58.15	-2.93412	-3.19322	1.34468	5.90961	3.55244	1.75952	-5.47727	-79.8591
58.2	-2.93412	-2.58287	3.78609	1.33197	4.77314	2.0647	-1.20481	-79.5539
58.25	-0.492718	-0.446636	-1.09672	1.02679	3.85762	-2.20776	-7.00315	-82.6057
58.3	1.33834	-2.27769	-0.181194	1.94232	6.29902	-0.987061	-7.00315	-82.3005
58.35	-2.32377	-4.10875	2.26021	3.4682	7.8249	1.75952	-3.64621	-81.385
58.4	-1.40824	-2.88804	3.17574	4.38373	5.68867	-2.20776	-8.22385	-79.8591
58.45	2.86422	-0.14146	-1.70707	4.07855	3.55244	-0.987061	-9.44455	-81.385
58.5	-0.187542	-2.27769	-1.4019	1.63715	3.85762	2.0647	-5.47727	-83.216
58.55	-2.0186	-2.58287	1.34468	1.02679	3.85762	-2.20776	-7.00315	-83.216
58.6	-0.492718	-0.751812	3.17574	0.721619	5.99385	-1.59741	-8.52903	-83.216
58.65	2.55904	1.38442	-1.70707	3.16303	8.43525	2.98022	-7.00315	-79.5539
58.7	-1.10307	-1.97252	-1.70707	5.90961	5.38349	-1.90259	-4.25657	-80.1643
58.75	-1.40824	-1.05699	0.734333	2.55267	4.16279	1.45435	-8.8342	-82.6057
58.8	1.33834	0.468891	3.48091	0.721619	4.16279	0.538818	-7.6135	-81.0798
58.85	3.47457	2.60512	-0.181194	1.94232	3.85762	-0.987061	-4.86692	-78.9436
58.9	-0.797894	-1.05699	-1.09672	3.4682	5.38349	3.2854	-7.30832	-76.5022
58.95	-0.797894	-0.751812	0.123981	5.29925	7.21455	-1.29224	-8.52903	-76.5022
59	1.03316	0.774067	3.48091	5.60443	7.21455	0.843994	-7.30832	-78.6384
59.05	2.55904	2.29995	1.95504	2.55267	4.46797	-0.681885	-4.25657	-79.2488
59.1	-1.71342	-0.751812	-1.09672	1.02679	2.94209	-1.59741	-9.13938	-79.5539
59.15	-0.492718	-2.27769	-0.48637	2.55267	3.55244	2.98022	-9.13938	-78.0281
59.2	1.64351	-0.14146	2.87056	2.55267	4.77314	-2.51294	-5.47727	-76.8074
59.25	3.77974	3.21547	3.78609	4.38373	6.29902	1.14917	-7.00315	-80.1643
59.3	0.117634	0.163715	0.429157	5.60443	7.21455	-1.59741	-9.13938	-80.4695
59.35	0.727985	-1.97252	0.734333	2.55267	6.6042	-1.29224	-8.22385	-79.5539
59.4	1.64351	0.468891	1.64986	1.63715	3.55244	1.45435	-4.56174	-77.7229
59.45	4.39009	3.52065	5.61715	0.416443	3.55244	-2.20776	-7.91867	-74.9763
59.5	1.33834	1.07924	1.95504	1.33197	3.55244	0.233643	-9.44455	-76.5022
59.55	1.03316	-0.446636	0.123981	2.2475	5.99385	-1.90259	-6.3928	-78.9436
59.6	1.94869	-1.05699	1.34468	4.07855	6.90937	-3.73364	-3.95139	-79.5539
59.65	4.08492	1.99477	2.87056	3.77338	2.94209	0.843994	-7.00315	-78.9436
59.7	1.94869	1.99477	3.48091	2.55267	2.63691	-3.42847	-8.8342	-77.1125
59.75	0.727985	-1.05699	1.95504	0.416443	5.68867	-1.90259	-4.86692	-74.366
59.8	1.03316	-1.05699	0.734333	-0.193909	5.99385	0.538818	-4.25657	-75.8918
59.85	3.77974	0.468891	1.03951	0.111267	3.24727	-2.81812	-8.22385	-78.0281
59.9	4.39009	2.60512	3.17574	0.721619	3.55244	1.75952	-8.8342	-76.8074
59.95	0.42281	0.163715	3.17574	2.85785	6.6042	0.538818	-6.3928	-74.9763
60	0.117634	-1.36216	1.03951	4.07855	2.94209	-1.29224	-5.47727	-72.5349
60.05	1.33834	-1.05699	0.123981	1.63715	4.77314	1.75952	-9.13938	-71.9245
60.1	4.69527	0.468891	1.03951	-0.80426	5.38349	-0.071533	-9.13938	-71.6194
60.15	0.42281	1.99477	2.56539	-1.41461	2.33174	-0.376709	-6.3928	-74.366
60.2	-2.0186	-1.05699	4.39644	0.111267	5.38349	2.36987	-5.78244	-75.2815
60.25	-1.40824	-2.27769	1.64986	-0.193909	4.46797	0.843994	-7.91867	-75.2815
60.3	0.42281	-1.97252	0.429157	1.33197	2.02656	-0.376709	-7.6135	-74.366
60.35	1.94869	0.468891	1.03951	1.94232	7.51973	2.67505	-5.17209	-73.4504
60.4	-2.62895	1.99477	1.95504	4.6889	1.72139	2.0647	-4.25657	-70.7038
60.45	-2.62895	-1.05699	5.00679	3.4682	4.16279	0.233643	-7.30832	-71.6194
60.5	-1.10307	-1.36216	2.56539	0.416443	5.38349	2.36987	-6.69797	-74.6711
60.55	1.33834	-0.751812	-0.48637	-0.80426	2.94209	3.2854	-5.47727	-74.9763
60.6	2.55904	1.07924	1.03951	-0.193909	7.21455	0.538818	-1.81516	-74.6711
60.65	-0.797894	2.60512	1.95504	1.33197	2.33174	1.45435	-5.17209	-73.4504
60.7	-1.40824	-0.14146	3.48091	1.33197	6.29902	2.98022	-4.86692	-73.1452
60.75	-0.797894	-2.27769	3.17574	2.2475	4.77314	-1.29224	-4.56174	-71.009
60.8	2.55904	-1.05699	0.429157	3.4682	3.55244	-0.681885	-2.42551	-70.0935
60.85	2.55904	0.163715	-0.48637	5.29925	7.21455	1.75952	-4.86692	-73.1452
60.9	-1.40824	2.60512	0.123981	3.77338	2.94209	-1.90259	-8.52903	-74.366
60.95	-2.0186	-0.751812	-0.48637	1.63715	4.77314	-1.59741	-7.6135	-73.7556
61	-1.10307	-2.58287	2.56539	0.721619	3.24727	2.36987	-6.08762	-72.8401
61.05	0.42281	-1.36216	2.87056	-1.10944	2.33174	-0.681885	-3.64621	-71.6194
61.1	3.16939	-0.751812	-0.791546	-0.80426	5.99385	-2.20776	-7.30832	-69.7883
61.15	-0.492718	1.68959	-2.01225	-1.41461	1.41621	0.843994	-8.8342	-67.6521
61.2	-2.0186	0.163715	-2.01225	0.111267	1.41621	1.14917	-7.30832	-66.1262
61.25	-1.10307	-1.36216	1.03951	-0.499084	5.38349	-2.81812	-3.95139	-67.9573
61.3	-0.187542	-2.88804	2.26021	-0.193909	0.805859	-2.20776	-4.25657	-69.7883
61.35	1.94869	-2.88804	2.26021	1.63715	3.55244	2.0647	-7.91867	-70.3987
61.4	1.33834	-1.36216	-1.09672	2.55267	4.46797	-1.59741	-7.6135	-70.3987
61.45	-2.0186	1.38442	-2.01225	1.33197	2.63691	-2.20776	-6.08762	-70.0935
61.5	-3.2393	0.163715	-1.09672	-0.80426	5.07832	0.843994	-3.64621	-69.4831
61.55	-1.71342	-2.88804	0.123981	-1.71979	3.85762	0.843994	-5.78244	-69.7883
61.6	-0.492718	-2.88804	1.03951	-1.41461	2.33174	-2.20776	-8.52903	-69.7883
61.65	2.25386	-1.66734	3.17574	0.111267	5.07832	-1.29224	-8.22385	-67.6521
61.7	-0.492718	0.163715	2.26021	2.85785	4.16279	2.67505	-6.08762	-69.178
61.75	-1.71342	1.68959	-0.181194	2.55267	2.02656	-1.29224	-3.95139	-71.9245
61.8	-2.32377	1.99477	-1.09672	-1.10944	5.38349	-2.20776	-5.47727	-74.0608
61.85	-1.71342	-1.05699	0.734333	0.721619	4.16279	1.14917	-9.13938	-73.1452
61.9	-0.492718	-1.66734	0.734333	2.2475	2.63691	2.0647	-8.52903	-73.4504
61.95	1.33834	0.163715	2.87056	4.07855	4.77314	-0.681885	-7.6135	-72.8401
62	1.03316	-0.751812	4.09127	0.416443	4.77314	0.233643	-5.17209	-71.3142
62.05	-0.187542	1.38442	4.39644	1.33197	2.33174	4.5061	-5.17209	-67.9573
62.1	-1.10307	2.29995	1.34468	2.85785	3.85762	2.98022	-8.22385	-66.1262
62.15	-1.10307	0.163715	0.123981	3.16303	6.6042	0.233643	-8.8342	-66.4314
62.2	1.33834	-2.58287	-0.48637	0.111267	1.41621	2.0647	-9.13938	-68.2624
62.25	2.86422	-2.58287	0.734333	2.85785	2.94209	4.5061	-7.30832	-68.5676
62.3	4.39009	-1.66734	1.34468	4.38373	6.6042	1.45435	-5.47727	-68.5676
62.35	3.16939	-1.05699	1.95504	-0.499084	2.33174	-1.29224	-8.52903	-68.8728
62.4	0.727985	0.468891	3.78609	2.2475	0.500683	0.538818	-10.0549	-65.821
62.45	1.03316	0.774067	2.56539	3.4682	4.77314	2.67505	-9.44455	-67.0417
62.5	0.42281	-0.751812	1.34468	0.111267	3.55244	-1.59741	-7.6135	-69.178
62.55	1.33834	-1.97252	-0.181194	2.2475	0.195507	-3.42847	-6.08762	-68.2624
62.6	2.55904	-1.66734	-1.4019	1.02679	2.33174	-1.59741	-4.56174	-65.2107
62.65	3.16939	1.38442	-1.70707	-0.193909	4.16279	2.0647	-7.00315	-66.4314
62.7	0.117634	0.468891	-0.48637	3.77338	0.195507	-1.90259	-7.6135	-67.3469
62.75	-1.71342	-2.27769	1.95504	-0.499084	2.33174	-1.90259	-6.69797	-64.6003
62.8	-0.797894	-1.36216	1.95504	-0.499084	5.99385	-1.29224	-7.00315	-61.8537
62.85	-1.40824	1.99477	1.95504	4.07855	1.72139	2.36987	-5.17209	-65.821
62.9	0.117634	-1.05699	0.123981	-0.193909	1.41621	-0.681885	-3.95139	-63.6848
62.95	1.94869	-1.97252	-1.09672	2.2475	4.46797	-2.20776	-5.17209	-60.9382
63	0.727985	1.99477	0.734333	4.07855	5.38349	-1.59741	-6.69797	-65.5159
63.05	-1.10307	-0.446636	1.34468	-0.193909	0.805859	2.36987	-7.00315	-63.3796
63.1	-1.10307	-1.66734	4.09127	2.2475	1.41621	1.14917	-6.3928	-60.9382
63.15	1.64351	3.52065	1.34468	3.77338	5.99385	-1.29224	-4.86692	-63.3796
63.2	0.727985	-1.05699	-0.791546	-1.10944	3.85762	0.233643	-2.12033	-61.2434
63.25	-1.40824	-1.36216	-0.48637	2.2475	2.94209	1.14917	-2.73069	-60.3279
63.3	-0.797894	1.68959	3.78609	3.4682	4.77314	2.36987	-4.86692	-60.9382
63.35	1.64351	-2.58287	0.123981	0.416443	5.68867	-2.81812	-7.30832	-56.3606
63.4	-2.32377	1.38442	-0.791546	1.33197	2.33174	-1.29224	-6.3928	-60.633
63.45	-0.492718	-2.88804	1.64986	4.99408	2.02656	1.14917	-7.00315	-60.633
63.5	2.25386	-1.97252	1.34468	0.416443	5.38349	2.67505	-5.17209	-56.0554
63.55	-2.0186	0.468891	-0.181194	1.02679	5.07832	-0.987061	-2.73069	-60.633
63.6	0.727985	-4.10875	2.56539	4.07855	1.11103	-1.90259	-3.34104	-58.4968
63.65	1.64351	0.468891	0.734333	1.33197	1.11103	-0.376709	-5.78244	-57.2761
63.7	-0.492718	-3.19322	-1.09672	1.02679	4.46797	2.0647	-7.30832	-60.0227
63.75	2.55904	-1.66734	4.09127	2.85785	2.94209	0.233643	-6.08762	-56.9709
63.8	-1.40824	-0.446636	0.123981	3.77338	0.500683	-3.73364	-5.78244	-57.8865
63.85	-0.492718	-2.58287	-0.48637	-0.193909	0.195507	-1.29224	-6.3928	-60.3279
63.9	2.25386	1.07924	4.09127	1.33197	4.46797	-0.071533	-5.17209	-56.3606
63.95	-1.71342	-3.19322	-0.181194	4.07855	1.72139	2.0647	-3.95139	-55.445
64	2.86422	-0.751812	1.95504	1.33197	-0.109669	0.233643	-3.64621	-57.2761
64.05	-1.10307	-0.446636	2.26021	-1.10944	1.11103	-1.90259	-6.3928	-53.614
64.1	0.727985	-2.58287	0.429157	1.63715	4.77314	-0.071533	-7.91867	-53.0036
64.15	1.33834	1.38442	5.31197	4.6889	2.33174	1.14917	-7.6135	-56.3606
64.2	-2.0186	-2.58287	0.429157	0.111267	1.72139	4.20093	-5.78244	-54.5295
64.25	2.55904	-2.58287	1.95504	0.111267	2.63691	1.14917	-3.64621	-51.7829
64.3	-2.0186	1.38442	4.09127	1.63715	6.29902	-0.376709	-1.20481	-56.0554
64.35	-1.10307	-3.19322	-0.48637	4.38373	3.24727	1.14917	-2.42551	-54.8347
64.4	1.33834	-0.751812	1.95504	0.416443	1.41621	1.75952	-5.47727	-51.4778
64.45	-1.40824	1.38442	1.64986	0.416443	2.33174	5.11646	-5.78244	-53.614
64.5	1.94869	-2.88804	-0.791546	2.55267	5.07832	2.36987	-5.78244	-54.8347
64.55	-0.492718	-0.446636	3.48091	4.6889	3.85762	-0.071533	-2.73069	-53.3088
64.6	-1.10307	0.163715	0.123981	1.33197	0.195507	0.538818	-6.08762	-50.8674
64.65	4.08492	-1.97252	0.123981	0.416443	1.72139	0.843994	-7.30832	-56.3606
64.7	-0.187542	-1.36216	3.48091	3.4682	2.33174	2.67505	-7.00315	-56.0554
64.75	1.03316	-0.446636	-0.181194	4.6889	4.16279	2.36987	-4.86692	-53.3088
64.8	3.77974	-3.49839	-1.4019	1.02679	0.195507	-1.29224	-7.6135	-52.3933
64.85	-1.71342	-0.14146	2.87056	1.02679	0.195507	-2.51294	-6.3928	-55.445
64.9	-0.492718	0.468891	-2.01225	2.2475	1.11103	-0.987061	-3.34104	-54.2243
64.95	3.16939	-2.58287	-2.31743	5.60443	3.85762	0.843994	-7.30832	-49.0364
65	-1.10307	0.163715	2.56539	1.02679	1.11103	2.36987	-6.08762	-51.7829
65.05	-0.187542	1.07924	-0.181194	1.33197	-1.33037	0.233643	-3.03586	-53.3088
65.1	3.47457	-2.58287	-1.09672	1.63715	-0.72002	-1.59741	-7.91867	-50.8674
65.15	-0.492718	-1.66734	1.95504	6.21478	2.02656	-0.681885	-5.47727	-48.1208
65.2	0.117634	2.9103	3.78609	2.2475	3.24727	-1.29224	-4.86692	-51.4778
65.25	4.39009	-1.97252	-0.181194	0.721619	0.195507	1.14917	-7.00315	-52.6985
65.3	0.117634	-1.36216	1.34468	1.33197	-0.72002	3.59058	-3.34104	-51.1726
65.35	-0.187542	2.29995	4.39644	4.6889	-0.109669	0.843994	-7.30832	-48.426
65.4	3.77974	-1.36216	-0.181194	4.07855	2.94209	-0.681885	-6.08762	-52.3933
65.45	-0.797894	-1.36216	0.123981	0.111267	2.94209	-0.376709	-3.95139	-51.7829
65.5	0.117634	3.52065	3.17574	1.33197	0.500683	-0.071533	-7.6135	-51.4778
65.55	2.86422	-0.446636	1.95504	2.85785	0.500683	2.98022	-3.64621	-49.3415
65.6	-0.187542	-2.27769	-0.181194	5.29925	1.72139	4.20093	-7.30832	-52.0881
65.65	-1.71342	0.163715	1.64986	2.2475	5.38349	2.36987	-7.30832	-51.4778
65.7	1.03316	1.99477	5.31197	1.02679	2.94209	-0.987061	-3.64621	-49.9519
65.75	1.03316	-2.58287	-0.48637	2.55267	0.195507	-1.59741	-7.6135	-47.8157
65.8	-2.32377	-1.36216	-0.791546	4.6889	0.195507	-1.29224	-3.64621	-50.8674
65.85	-1.10307	2.60512	2.56539	4.99408	2.33174	-0.987061	-4.25657	-50.8674
65.9	3.47457	-0.14146	3.17574	1.63715	4.46797	1.75952	-6.08762	-49.9519
65.95	-1.10307	-1.05699	-1.70707	1.33197	3.55244	3.2854	-2.73069	-45.9846
66	-1.40824	1.38442	0.734333	2.55267	0.195507	1.75952	-7.30832	-48.1208
66.05	2.86422	2.60512	3.78609	4.07855	0.195507	-0.987061	-6.08762	-50.8674
66.1	0.42281	-0.14146	1.64986	2.2475	0.500683	-2.20776	-2.73069	-50.8674
66.15	-0.797894	0.774067	-1.09672	-0.499084	2.33174	-0.681885	-9.13938	-47.8157
66.2	1.94869	4.131	0.734333	0.111267	3.55244	1.14917	-7.30832	-46.9001
66.25	4.39009	0.163715	4.09127	0.416443	0.500683	2.67505	-2.42551	-50.8674
66.3	-0.187542	-0.751812	0.123981	1.94232	-0.414845	0.843994	-7.91867	-50.5622
66.35	-0.187542	1.07924	-1.09672	1.94232	0.500683	-0.987061	-7.30832	-49.3415
66.4	4.08492	1.07924	-0.181194	-0.193909	0.805859	-0.376709	-4.25657	-46.9001
66.45	1.94869	-1.97252	2.87056	0.416443	3.55244	0.843994	-7.00315	-49.6467
66.5	-0.492718	-1.66734	-0.791546	0.721619	2.63691	3.89575	-6.3928	-51.7829
66.55	1.64351	0.774067	-1.4019	2.2475	-0.109669	0.843994	-3.03586	-50.8674
66.6	3.77974	-0.14146	0.734333	4.07855	-1.33037	2.0647	-6.3928	-49.0364
66.65	0.42281	-2.27769	2.87056	-0.193909	0.195507	4.20093	-6.69797	-46.595
66.7	-0.492718	0.163715	-0.48637	-1.10944	2.63691	3.59058	-3.34104	-49.0364
66.75	2.55904	3.52065	0.123981	-0.499084	4.16279	0.843994	-4.86692	-49.3415
66.8	4.08492	-0.14146	3.17574	0.416443	3.24727	3.59058	-6.69797	-47.2053
66.85	-0.797894	-0.446636	3.78609	3.4682	-0.109669	3.89575	-5.17209	-44.1535
66.9	-0.492718	1.38442	1.34468	1.63715	-0.414845	0.538818	-3.03586	-44.4587
66.95	3.47457	3.82583	1.03951	-0.499084	0.500683	5.11646	-6.69797	-47.5105
67	2.55904	-0.446636	2.26021	-0.80426	1.41621	0.843994	-7.00315	-45.6794
67.05	-0.187542	-0.14146	4.39644	0.416443	2.33174	0.843994	-2.73069	-44.1535
67.1	0.727985	0.468891	1.95504	3.4682	4.16279	4.20093	-6.3928	-42.0173
67.15	5.00045	3.52065	0.123981	4.38373	2.33174	0.538818	-5.47727	-42.3225
67.2	2.55904	-2.27769	0.429157	1.94232	-0.109669	2.36987	-3.03586	-44.1535
67.25	0.727985	-1.36216	3.78609	-1.10944	1.11103	1.75952	-2.12033	-43.8484
67.3	1.64351	0.468891	1.03951	-0.193909	0.805859	-0.681885	-5.78244	-43.5432
67.35	4.69527	2.29995	-1.09672	-0.499084	2.33174	4.20093	-3.64621	-41.407
67.4	1.64351	-2.58287	-1.09672	1.94232	2.94209	-0.071533	-1.50998	-39.8811
67.45	1.03316	-2.27769	1.03951	4.38373	2.94209	2.36987	-5.78244	-41.7121
67.5	0.727985	0.163715	2.87056	2.55267	0.805859	-0.681885	-5.47727	-42.6277
67.55	3.77974	1.07924	-0.791546	-0.80426	-0.414845	-1.59741	-3.64621	-42.6277
67.6	2.25386	-2.88804	-0.48637	-1.10944	-1.0252	2.67505	-1.81516	-41.407
67.65	0.117634	-3.80357	0.734333	1.33197	-0.109669	-2.20776	-6.3928	-38.3552
67.7	0.727985	-1.36216	5.00679	1.94232	2.63691	1.45435	-4.25657	-39.8811
67.75	4.69527	1.99477	1.95504	3.16303	3.55244	-3.42847	-1.50998	-41.407
67.8	2.55904	-1.36216	-0.791546	2.55267	0.805859	-1.29224	-3.64621	-41.1018
67.85	0.117634	-2.88804	-0.48637	1.94232	-0.72002	2.0647	-4.86692	-39.5759
67.9	0.117634	-1.97252	1.95504	-0.499084	-0.109669	-1.90259	-4.56174	-37.7449
67.95	2.55904	1.68959	4.09127	-0.499084	2.63691	1.45435	-1.20481	-36.219
68	4.08492	1.38442	1.34468	-0.499084	3.55244	-0.681885	-4.56174	-39.2707
68.05	-0.187542	-2.58287	0.123981	1.94232	0.195507	-0.681885	-5.78244	-40.7966
68.1	-1.10307	-2.88804	0.734333	3.4682	1.72139	2.98022	-4.56174	-39.8811
68.15	0.42281	-0.14146	2.87056	3.77338	6.29902	-0.681885	-0.899632	-38.05
68.2	3.47457	1.68959	4.09127	1.63715	4.46797	-0.376709	-4.56174	-38.05
68.25	0.42281	-1.97252	0.123981	-0.80426	3.24727	3.2854	-4.56174	-36.5242
68.3	-1.40824	-2.58287	-0.48637	0.111267	6.6042	-0.681885	-3.34104	-39.5759
68.35	-1.71342	-2.58287	-0.181194	1.02679	6.29902	0.843994	-0.594456	-41.1018
68.4	0.727985	0.774067	1.64986	1.02679	6.29902	2.0647	-3.95139	-41.7121
68.45	1.03316	1.07924	2.56539	2.85785	10.2663	-0.987061	-3.95139	-40.7966
68.5	-0.797894	-1.66734	0.123981	4.6889	5.99385	0.843994	-0.899632	-38.6604
68.55	-1.40824	-2.88804	-1.09672	5.29925	6.6042	2.0647	0.931423	-37.4397
68.6	-0.187542	-0.751812	-0.48637	1.94232	10.2663	-1.29224	-2.42551	-38.9656
68.65	3.16939	1.68959	0.123981	0.721619	5.38349	0.538818	-2.73069	-41.1018
68.7	1.64351	0.774067	2.87056	-0.193909	8.43525	2.98022	-1.50998	-42.0173
68.75	-1.10307	-1.36216	1.64986	0.416443	7.51973	-2.20776	1.2366	-40.7966
68.8	0.42281	-1.36216	-1.09672	-0.193909	7.21455	-0.376709	-1.81516	-40.4914
68.85	1.33834	-0.446636	-0.791546	1.02679	9.96113	1.75952	-3.34104	-38.6604
68.9	3.77974	2.60512	0.429157	2.55267	6.29902	-0.987061	-2.73069	-36.219
68.95	1.03316	2.29995	1.95504	4.07855	10.8767	-0.987061	1.54177	-36.8293
69	-1.10307	-0.751812	3.78609	3.16303	8.43525	3.59058	-0.899632	-38.3552
69.05	0.727985	-0.751812	0.429157	0.721619	9.35078	-0.376709	-3.64621	-38.05
69.1	1.94869	-1.36216	-0.791546	0.111267	12.4025	0.233643	-2.73069	-37.4397
69.15	3.77974	2.29995	-0.791546	-0.499084	9.96113	2.67505	0.015896	-36.219
69.2	0.727985	2.60512	0.734333	0.111267	15.4543	-1.29224	1.2366	-34.9983
69.25	-0.187542	-1.05699	2.87056	0.416443	11.1818	-0.376709	-3.64621	-32.862
69.3	-0.492718	-0.751812	3.17574	1.33197	12.7077	1.45435	-3.03586	-31.6413
69.35	0.42281	-1.05699	3.17574	1.94232	16.9802	0.538818	-1.50998	-33.1672
69.4	2.86422	1.38442	1.03951	2.85785	14.5388	-2.20776	2.15213	-34.3879
69.45	3.77974	4.43618	0.734333	5.29925	17.5905	-0.071533	0.015896	-35.3034
69.5	0.117634	1.99477	0.429157	4.07855	15.4543	2.67505	-3.03586	-34.6931
69.55	-0.797894	-0.751812	0.734333	3.16303	14.5388	-2.81812	-1.81516	-34.3879
69.6	0.42281	0.468891	2.56539	2.2475	19.7268	-2.20776	1.2366	-33.4724
69.65	2.86422	0.774067	4.09127	0.416443	15.7595	1.75952	3.06765	-33.4724
69.7	5.30562	2.29995	2.56539	0.721619	16.9802	-2.20776	-1.20481	-30.7258
69.75	2.55904	3.52065	0.429157	1.02679	20.3371	-2.51294	-1.20481	-31.6413
69.8	-0.187542	1.07924	-0.791546	1.33197	16.0646	-0.376709	-0.594456	-33.1672
69.85	-1.10307	-0.751812	-0.48637	2.2475	18.5061	0.233643	2.4573	-34.3879
69.9	-0.187542	-2.58287	-0.181194	4.38373	19.4216	-3.42847	2.4573	-34.3879
69.95	2.55904	-1.36216	0.734333	4.38373	16.0646	-1.29224	-0.594456	-31.9465
70	4.08492	0.774067	2.26021	1.33197	18.2009	1.75952	-1.50998	-31.6413
70.05	1.33834	2.29995	2.26021	-0.193909	20.3371	-0.681885	-0.28928	-31.9465
70.1	-1.40824	-0.14146	1.34468	-0.499084	16.3698	-1.29224	0.626247	-31.031
70.15	1.03316	-1.66734	-1.09672	2.55267	17.8957	0.843994	1.54177	-28.5896
70.2	0.727985	-1.05699	-0.48637	3.4682	21.5578	1.75952	-0.899632	-27.6741
70.25	3.16939	-0.446636	-0.48637	-0.80426	16.9802	-2.81812	-3.03586	-28.2844
70.3	4.69527	0.774067	-0.791546	-0.193909	18.5061	-1.59741	-1.81516	-30.1155
70.35	2.55904	2.9103	1.64986	3.16303	21.5578	1.14917	-0.594456	-31.031
70.4	-0.492718	2.29995	1.64986	3.16303	17.5905	-1.29224	0.626247	-31.031
70.45	-0.492718	0.774067	4.39644	-0.193909	18.8112	-3.73364	-1.81516	-30.4206
70.5	0.727985	-1.36216	3.17574	1.02679	22.4733	-0.681885	-4.56174	-29.5051
70.55	1.94869	-0.751812	1.64986	4.6889	18.5061	2.67505	-3.34104	-28.2844
70.6	3.16939	-0.751812	-0.181194	0.416443	18.2009	-1.29224	-3.03586	-24.9275
70.65	3.16939	0.468891	0.123981	1.33197	22.4733	-1.29224	-0.594456	-27.3689
70.7	2.55904	2.60512	0.734333	5.60443	19.7268	0.233643	-0.899632	-29.8103
70.75	0.117634	1.99477	-0.181194	-0.499084	18.8112	2.98022	-3.34104	-29.1999
70.8	-0.797894	-1.05699	1.34468	2.85785	20.0319	-1.29224	-3.64621	-26.7585
70.85	-0.492718	-1.36216	1.64986	4.99408	21.863	-1.29224	-2.12033	-24.3171
70.9	1.03316	0.163715	4.70162	0.416443	18.5061	0.843994	0.321072	-29.8103
70.95	1.94869	1.68959	2.26021	3.16303	19.7268	3.89575	2.15213	-29.8103
71	3.77974	-0.14146	1.34468	2.55267	22.4733	0.843994	1.2366	-27.9792
71.05	1.03316	-2.27769	0.123981	1.33197	17.8957	0.843994	-1.20481	-27.6741
71.1	-0.797894	-1.66734	0.734333	3.16303	19.4216	2.98022	-1.20481	-31.6413
71.15	0.117634	1.68959	0.429157	1.02679	21.5578	5.11646	-1.81516	-30.1155
71.2	1.03316	-2.27769	1.03951	-0.193909	20.6423	1.14917	0.321072	-26.4534
71.25	3.47457	-2.58287	3.78609	4.6889	18.2009	-0.071533	3.06765	-31.6413
71.3	4.69527	-0.14146	5.31197	-0.499084	19.7268	2.36987	0.931423	-29.8103
71.35	1.03316	-1.97252	2.26021	1.02679	20.3371	4.5061	-1.50998	-26.7585
71.4	0.117634	-2.88804	-0.48637	3.4682	16.3698	-0.376709	-3.64621	-28.5896
71.45	0.727985	2.60512	0.734333	-0.499084	18.2009	-0.681885	-2.12033	-26.7585
71.5	4.39009	-0.751812	1.95504	0.416443	20.9475	-0.376709	-2.12033	-24.6223
71.55	1.03316	-1.05699	3.48091	2.2475	18.8112	3.89575	-0.899632	-27.0637
71.6	0.117634	2.9103	0.429157	-0.193909	16.675	1.14917	-0.28928	-23.7068
71.65	2.25386	-0.446636	0.429157	0.721619	19.4216	-1.59741	-0.899632	-25.843
71.7	1.64351	1.68959	2.56539	4.38373	21.2526	-0.681885	-2.73069	-25.843
71.75	-0.187542	1.68959	3.48091	-0.80426	17.2854	3.2854	-2.42551	-22.4861
71.8	2.25386	-0.14146	-0.48637	1.02679	16.9802	3.89575	-0.899632	-27.9792
71.85	1.33834	3.82583	0.429157	4.38373	20.3371	0.233643	-1.50998	-27.3689
71.9	-0.797894	-0.446636	4.39644	1.02679	20.9475	0.843994	0.931423	-23.0964
71.95	2.86422	1.68959	0.429157	0.416443	17.8957	0.843994	1.84695	-28.2844
72	0.727985	-0.14146	0.734333	3.16303	18.2009	5.11646	0.626247	-24.9275
72.05	-0.797894	-1.66734	3.17574	2.85785	21.2526	1.75952	-1.81516	-24.9275
72.1	3.77974	1.68959	-0.791546	0.416443	20.6423	-0.681885	-1.50998	-26.4534
72.15	-0.797894	-2.27769	2.26021	1.33197	17.8957	-0.681885	0.321072	-24.6223
72.2	2.25386	-0.446636	1.95504	4.99408	20.0319	2.36987	-1.81516	-24.3171
72.25	0.727985	-2.58287	0.429157	0.721619	22.4733	3.2854	0.015896	-26.7585
72.3	-0.797894	-2.27769	3.48091	1.33197	20.0319	-1.59741	1.54177	-24.6223
72.35	3.77974	2.29995	1.34468	2.55267	18.5061	-1.29224	1.84695	-24.0119
72.4	-1.10307	-3.19322	-1.09672	4.38373	19.4216	-0.376709	-0.594456	-27.6741
72.45	2.86422	-0.14146	4.09127	1.33197	23.3889	2.36987	-3.03586	-24.3171
72.5	0.117634	-1.05699	-0.791546	1.02679	19.1164	1.45435	-3.03586	-24.0119
72.55	-0.492718	-1.66734	1.64986	3.77338	18.5061	-0.376709	-3.64621	-27.9792
72.6	4.08492	2.29995	2.26021	2.55267	18.8112	0.538818	-2.42551	-27.6741
72.65	-0.492718	-1.66734	-0.181194	0.721619	22.1682	1.45435	-1.81516	-23.7068
72.7	2.25386	-1.05699	4.39644	1.02679	18.8112	2.0647	0.321072	-28.5896
72.75	1.94869	1.68959	1.03951	3.16303	17.2854	1.45435	-3.34104	-29.8103
72.8	-0.492718	-3.80357	-1.4019	1.02679	17.8957	-1.29224	-3.64621	-28.2844
72.85	3.77974	-1.66734	3.17574	0.721619	20.6423	-0.987061	-2.42551	-26.7585
72.9	-2.0186	1.68959	-0.791546	1.63715	19.1164	-0.987061	0.931423	-29.5051
72.95	0.727985	-1.97252	-1.09672	5.60443	17.2854	-0.071533	-2.12033	-27.6741
73	3.16939	-0.751812	4.09127	1.94232	17.5905	0.538818	-3.95139	-22.4861
73.05	-1.40824	0.468891	-0.791546	0.416443	20.6423	-1.29224	-2.12033	-26.1482
73.1	0.42281	-1.97252	0.123981	1.94232	21.2526	-1.29224	-0.594456	-25.2326
73.15	0.727985	0.468891	4.70162	4.6889	17.2854	-0.681885	-4.25657	-23.0964
73.2	-0.797894	2.9103	1.03951	1.63715	18.8112	1.14917	-2.42551	-20.9602
73.25	1.64351	-1.66734	0.429157	-0.80426	20.3371	3.89575	1.2366	-26.1482
73.3	1.03316	0.468891	3.78609	1.63715	22.4733	2.0647	-3.03586	-25.843
73.35	-1.10307	2.9103	1.64986	4.07855	19.1164	-0.987061	-1.50998	-24.0119
73.4	3.16939	-1.66734	0.734333	2.85785	18.5061	-1.29224	2.15213	-24.3171
73.45	2.25386	-1.36216	2.26021	-0.499084	19.4216	-1.29224	-3.95139	-28.8948
73.5	0.117634	2.60512	3.17574	1.02679	21.5578	1.14917	-1.50998	-28.2844
73.55	2.86422	-1.97252	-0.791546	3.4682	20.3371	2.0647	-1.50998	-25.2326
73.6	3.16939	-1.97252	1.03951	3.16303	17.2854	0.233643	-3.34104	-25.843
73.65	0.42281	2.29995	3.17574	-0.193909	17.2854	-0.681885	0.015896	-28.5896
73.7	2.55904	-1.97252	0.123981	0.416443	17.8957	0.233643	-4.25657	-26.7585
73.75	5.00045	-2.88804	-0.181194	2.2475	20.0319	0.538818	-2.73069	-24.3171
73.8	0.117634	0.468891	1.64986	4.07855	17.8957	2.36987	-0.899632	-24.6223
73.85	1.94869	-1.05699	2.26021	0.416443	15.1491	4.5061	-4.86692	-27.6741
73.9	5.91597	-3.49839	-1.70707	0.111267	15.4543	1.45435	-0.594456	-26.1482
73.95	0.727985	-1.36216	0.123981	0.721619	16.9802	-1.59741	-2.73069	-23.7068
74	0.117634	1.07924	3.17574	2.2475	18.5061	-1.59741	-2.73069	-23.7068
74.05	4.39009	-3.49839	-0.181194	2.85785	15.4543	-0.681885	0.931423	-27.0637
74.1	0.727985	-3.19322	-1.4019	-0.499084	12.4025	0.538818	-3.64621	-25.843
74.15	0.117634	1.99477	1.03951	0.111267	14.5388	1.45435	0.015896	-22.7912
74.2	2.55904	-2.27769	3.48091	0.721619	16.3698	1.14917	-1.20481	-21.8757
74.25	3.16939	-3.19322	-0.48637	2.55267	15.7595	-0.987061	-2.12033	-25.2326
74.3	-0.492718	-0.446636	-0.48637	2.85785	13.3181	-1.59741	2.4573	-25.843
74.35	1.03316	0.468891	2.26021	0.111267	11.487	-1.90259	-1.50998	-23.0964
74.4	3.47457	-2.88804	3.48091	1.33197	12.7077	-0.987061	-1.20481	-20.3498
74.45	0.117634	-1.66734	-0.48637	2.2475	13.3181	-0.071533	3.06765	-24.3171
74.5	-0.492718	2.60512	0.429157	4.6889	15.4543	2.0647	-2.12033	-24.3171
74.55	1.94869	-2.58287	2.26021	3.4682	13.6232	0.843994	-1.50998	-23.7068
74.6	1.94869	-1.97252	2.56539	1.33197	10.2663	-0.987061	2.76248	-19.7395
74.65	-0.492718	0.468891	-0.791546	2.2475	10.8767	0.233643	-1.81516	-20.9602
74.7	0.727985	1.38442	-0.791546	3.4682	11.1818	1.75952	-2.12033	-23.4016
74.75	3.16939	-2.88804	1.64986	5.90961	12.0974	6.03198	2.15213	-22.1809
74.8	-0.187542	-1.05699	1.95504	4.07855	12.7077	1.45435	-2.42551	-22.1809
74.85	-0.492718	3.82583	-0.48637	1.02679	9.96113	0.233643	-0.899632	-20.3498
74.9	1.94869	0.163715	-1.09672	1.94232	6.90937	0.843994	0.626247	-24.3171
74.95	2.86422	-1.05699	3.17574	2.55267	7.51973	3.2854	-0.899632	-26.1482
75	-0.797894	0.163715	3.78609	5.90961	7.21455	-1.90259	-2.12033	-25.2326
75.05	-0.492718	2.60512	0.734333	4.38373	8.74043	-0.376709	0.015896	-23.7068
75.1	3.47457	-2.27769	0.734333	1.63715	8.13008	2.98022	-0.594456	-21.8757
75.15	1.33834	-1.66734	2.87056	1.02679	4.77314	-1.29224	-3.34104	-25.5378
75.2	-0.797894	0.774067	4.70162	1.33197	3.24727	-0.987061	-1.20481	-26.1482
75.25	0.42281	2.60512	0.123981	2.85785	2.94209	3.89575	1.54177	-25.843
75.3	3.77974	-1.66734	-0.791546	5.60443	3.24727	-0.071533	-3.03586	-24.0119
75.35	0.727985	-1.97252	0.734333	4.07855	3.85762	1.45435	-3.34104	-22.7912
75.4	-0.492718	1.99477	4.39644	1.94232	6.6042	3.2854	1.54177	-24.9275
75.45	1.64351	2.29995	0.123981	1.33197	3.24727	-0.681885	-0.28928	-25.843
75.5	4.08492	-2.27769	-1.4019	1.63715	1.72139	3.89575	-2.12033	-25.2326
75.55	0.727985	-2.27769	-0.48637	4.07855	1.11103	-0.071533	0.626247	-22.7912
75.6	0.42281	1.68959	2.26021	5.90961	2.94209	-0.987061	3.37283	-21.2654
75.65	1.64351	2.9103	1.95504	3.77338	4.16279	1.14917	-0.28928	-24.0119
75.7	5.00045	-1.05699	-1.09672	1.33197	5.38349	-2.20776	-0.28928	-25.5378
75.75	1.03316	-0.14146	-0.48637	1.63715	5.38349	2.0647	3.67801	-25.2326
75.8	-0.187542	1.68959	1.03951	3.16303	2.63691	-0.376709	0.931423	-23.4016
75.85	1.94869	2.9103	3.17574	4.38373	2.33174	-0.071533	-0.594456	-21.8757
75.9	3.77974	-0.751812	1.34468	5.60443	2.33174	0.233643	0.931423	-24.3171
75.95	0.117634	-0.14146	-0.791546	4.38373	3.24727	-1.59741	3.67801	-26.1482
76	0.117634	1.07924	0.123981	2.55267	3.55244	3.59058	0.015896	-25.2326
76.05	1.33834	2.9103	2.26021	1.94232	6.29902	-1.90259	-0.899632	-24.9275
76.1	4.08492	-0.751812	3.78609	1.94232	3.55244	0.233643	1.54177	-23.0964
76.15	0.727985	-1.97252	-0.181194	2.2475	1.11103	0.233643	2.4573	-21.8757
76.2	0.727985	-0.446636	-0.181194	4.07855	2.02656	-1.59741	-0.28928	-23.4016
76.25	1.33834	2.60512	0.123981	4.99408	3.85762	2.0647	-0.899632	-24.9275
76.3	4.08492	0.774067	2.56539	1.94232	5.99385	-1.90259	2.4573	-24.3171
76.35	2.25386	-1.97252	2.26021	-0.80426	0.805859	-0.987061	1.84695	-23.7068
76.4	0.727985	-1.05699	-0.48637	-0.193909	1.11103	2.0647	-0.28928	-20.3498
76.45	1.03316	1.99477	0.123981	-0.499084	4.16279	-2.81812	0.626247	-19.7395
76.5	3.16939	2.9103	0.734333	-0.499084	3.55244	-0.071533	3.67801	-24.0119
76.55	3.16939	-1.05699	2.56539	1.33197	0.195507	1.14917	0.931423	-24.6223
76.6	0.117634	-1.36216	4.70162	3.4682	1.41621	-0.681885	-1.20481	-24.9275
76.65	-0.797894	0.163715	2.56539	2.2475	4.46797	1.75952	0.321072	-24.3171
76.7	1.33834	3.21547	1.03951	-0.499084	-0.414845	1.45435	2.76248	-23.0964
76.75	3.16939	1.68959	1.03951	-1.10944	0.805859	0.538818	0.626247	-22.1809
76.8	0.42281	-1.36216	2.87056	-0.499084	2.33174	3.59058	-2.73069	-24.0119
76.85	-1.71342	-0.14146	4.70162	0.721619	-0.72002	1.45435	-1.20481	-25.2326
76.9	-1.10307	1.07924	3.17574	0.721619	3.55244	0.843994	2.76248	-24.3171
76.95	0.727985	3.21547	1.03951	2.85785	0.805859	3.2854	0.931423	-23.4016
77	2.25386	1.07924	0.734333	3.4682	0.805859	3.2854	-2.73069	-21.8757
77.05	-1.71342	-2.27769	1.03951	3.4682	5.68867	1.75952	-1.81516	-20.0447
77.1	-2.62895	-1.05699	3.17574	1.33197	0.805859	4.20093	0.931423	-18.824
77.15	-0.492718	1.38442	5.00679	-0.193909	3.55244	2.98022	1.84695	-21.8757
77.2	1.64351	3.82583	1.03951	-0.193909	2.33174	1.45435	-2.42551	-23.7068
77.25	2.55904	-0.14146	0.429157	0.111267	-0.109669	3.59058	-1.81516	-24.0119
77.3	-1.10307	-1.36216	1.34468	1.33197	4.77314	3.89575	0.321072	-23.4016
77.35	-0.492718	-0.751812	2.26021	2.55267	0.805859	-0.376709	2.4573	-24.0119
77.4	0.727985	0.774067	3.48091	3.16303	3.55244	0.843994	-1.50998	-22.1809
77.45	2.25386	3.82583	4.39644	4.99408	0.805859	4.81128	-1.81516	-18.5188
77.5	2.86422	2.29995	0.734333	3.4682	0.195507	-1.29224	-0.594456	-20.0447
77.55	-0.797894	-1.05699	-1.4019	1.02679	2.63691	0.538818	2.76248	-21.8757
77.6	0.117634	-0.751812	-0.48637	0.416443	-1.94072	4.5061	0.015896	-23.0964
77.65	0.727985	-0.14146	-0.791546	-0.193909	2.94209	0.538818	-2.73069	-21.2654
77.7	3.47457	1.68959	1.64986	-0.193909	-0.72002	-0.681885	-1.50998	-21.2654
77.75	4.08492	1.38442	3.48091	-0.193909	-1.63555	2.0647	0.015896	-20.9602
77.8	1.33834	-1.36216	0.123981	0.721619	2.02656	2.0647	0.931423	-20.3498
77.85	0.727985	-3.19322	-1.4019	2.55267	-3.16143	-1.29224	-2.12033	-17.6033
77.9	0.117634	-1.97252	0.123981	3.16303	-0.414845	0.233643	-2.42551	-19.1291
77.95	1.64351	-0.14146	0.123981	3.16303	0.805859	2.36987	-2.42551	-20.655
78	4.39009	1.07924	1.95504	4.07855	-4.07695	-0.681885	-0.899632	-21.8757
78.05	2.86422	0.163715	2.87056	3.16303	-2.85625	-0.681885	-1.50998	-22.4861
78.1	-2.0186	-1.66734	2.56539	0.721619	-3.77178	3.2854	-3.95139	-20.9602
78.15	-1.71342	-1.97252	1.34468	0.111267	-8.34942	-0.071533	-3.64621	-21.2654
78.2	-0.797894	-1.66734	-0.791546	-0.499084	-7.43389	-0.681885	-1.81516	-19.7395
78.25	1.94869	-0.446636	-1.09672	0.416443	-11.096	1.45435	0.626247	-20.0447
78.3	2.55904	1.68959	-1.4019	1.94232	-15.3685	3.89575	1.84695	-18.5188
78.35	1.03316	0.774067	1.34468	4.07855	-14.4529	-0.071533	-2.12033	-17.6033
78.4	-0.492718	-1.97252	1.64986	3.16303	-18.115	-0.071533	-1.20481	-19.1291
78.45	-0.492718	-2.88804	1.95504	-0.193909	-21.7771	5.72681	-0.28928	-20.655
78.5	0.117634	-3.19322	-0.791546	1.02679	-21.7771	3.2854	1.54177	-21.8757
78.55	0.727985	-1.05699	-1.4019	3.4682	-24.2186	0.233643	1.2366	-22.1809
78.6	4.08492	1.07924	-2.01225	4.6889	-27.8807	1.45435	-0.28928	-21.2654
78.65	1.94869	1.99477	-1.70707	1.63715	-27.8807	4.5061	-2.73069	-20.655
78.7	-0.492718	-0.446636	-0.791546	1.94232	-28.491	1.14917	-2.12033	-21.2654
78.75	-1.10307	-1.36216	1.03951	5.60443	-33.0687	-0.376709	0.015896	-19.4343
78.8	-0.187542	-0.751812	2.26021	2.85785	-32.4583	2.36987	1.84695	-19.1291
78.85	1.33834	-1.05699	2.87056	1.94232	-31.2376	3.89575	-1.20481	-21.5705
78.9	3.47457	0.468891	2.56539	3.77338	-35.8152	0.233643	-3.64621	-23.0964
78.95	3.77974	1.99477	0.734333	4.38373	-35.8152	-0.376709	-2.73069	-22.4861
79	0.727985	2.29995	-1.09672	1.02679	-32.4583	2.0647	-1.20481	-23.0964
79.05	-0.797894	-1.05699	-2.01225	3.77338	-36.7308	3.2854	0.321072	-21.2654
79.1	-0.797894	-2.58287	-1.4019	3.77338	-37.3411	-1.29224	0.015896	-18.824
79.15	0.117634	-0.751812	-1.09672	1.02679	-33.679	-1.29224	-1.81516	-22.4861
79.2	0.727985	0.163715	0.123981	3.4682	-35.2049	1.45435	-2.73069	-22.7912
79.25	2.55904	2.9103	0.734333	1.02679	-37.6463	1.14917	-2.42551	-21.5705
79.3	3.47457	-1.05699	1.34468	0.416443	-36.7308	-1.90259	-0.899632	-19.1291
79.35	0.42281	-1.05699	1.03951	4.6889	-33.0687	-1.29224	0.931423	-22.4861
79.4	-0.797894	-0.751812	-1.70707	-0.499084	-37.6463	1.45435	1.54177	-21.2654
79.45	-1.10307	2.29995	-2.01225	-0.499084	-37.9515	1.14917	-1.81516	-16.0774
79.5	-1.40824	-1.97252	-2.31743	3.77338	-33.679	-2.20776	-3.64621	-20.3498
79.55	-0.797894	-1.36216	-1.09672	-0.80426	-36.4256	-1.29224	-3.03586	-20.9602
79.6	1.03316	1.07924	0.123981	1.94232	-36.4256	1.14917	-2.12033	-16.6877
79.65	-1.71342	0.774067	1.64986	2.85785	-34.8997	1.45435	0.015896	-21.2654
79.7	-3.2393	-0.14146	1.95504	-0.499084	-32.1531	-1.90259	1.54177	-21.2654
79.75	-2.0186	2.29995	-1.4019	2.55267	-36.4256	-0.987061	0.626247	-16.9929
79.8	1.03316	1.38442	-0.48637	2.55267	-35.5101	0.233643	-1.20481	-21.2654
79.85	0.727985	0.774067	-0.181194	0.416443	-31.2376	1.75952	-1.20481	-21.2654
79.9	-0.797894	4.43618	4.09127	3.4682	-33.9842	-3.12329	-1.20481	-17.9084
79.95	0.42281	-0.751812	0.429157	2.85785	-36.4256	-1.90259	0.931423	-22.7912
80	3.77974	1.07924	0.123981	1.02679	-34.5945	-1.29224	1.2366	-20.3498
80.05	-0.797894	1.68959	2.56539	2.85785	-29.4065	2.67505	2.76248	-20.3498
80.1	0.727985	-1.66734	3.48091	4.38373	-35.8152	-0.681885	0.015896	-24.0119
80.15	5.00045	3.21547	0.123981	0.111267	-35.8152	-1.90259	-1.81516	-19.1291
80.2	-0.187542	-2.27769	0.734333	1.63715	-34.2894	-1.59741	-1.20481	-23.0964
80.25	1.03316	-0.446636	3.48091	4.07855	-33.3738	1.14917	-0.28928	-23.0964
80.3	2.55904	-0.751812	-1.09672	-0.499084	-39.1722	2.36987	-0.899632	-19.4343
80.35	-0.492718	-2.27769	0.123981	0.721619	-40.698	-1.29224	0.931423	-24.0119
80.4	2.25386	3.21547	3.48091	2.2475	-37.6463	-1.29224	3.67801	-22.7912
80.45	-0.797894	-1.97252	-0.791546	1.33197	-39.7825	-0.071533	3.06765	-20.3498
80.5	-1.40824	0.163715	0.429157	-1.71979	-44.6653	4.81128	0.931423	-24.3171
80.55	3.16939	-1.66734	1.03951	0.416443	-45.2757	2.36987	-0.28928	-23.0964
80.6	-1.71342	-1.66734	-0.181194	3.77338	-43.4446	-0.681885	0.626247	-19.1291
80.65	1.33834	3.21547	2.87056	-0.193909	-44.6653	-0.071533	1.54177	-24.0119
80.7	-0.492718	-2.58287	-0.48637	-1.10944	-49.8533	2.67505	1.2366	-22.4861
80.75	0.117634	0.774067	-1.09672	1.63715	-50.1585	3.59058	1.84695	-19.1291
80.8	3.77974	-0.14146	4.09127	3.4682	-46.8016	0.843994	1.2366	-23.4016
80.85	-0.797894	-1.36216	0.123981	0.416443	-46.4964	-1.59741	0.931423	-22.4861
80.9	3.47457	1.99477	1.95504	-0.193909	-50.7688	-0.681885	-1.50998	-18.5188
80.95	0.727985	-1.97252	1.95504	2.55267	-49.5481	1.75952	-2.12033	-20.9602
81	0.42281	-1.36216	-0.48637	3.77338	-47.1067	3.89575	-1.81516	-21.2654
81.05	3.16939	2.9103	3.17574	-0.193909	-46.1912	0.843994	1.2366	-17.9084
81.1	-0.797894	-1.36216	1.34468	0.721619	-49.5481	-1.59741	3.67801	-17.6033
81.15	2.25386	-0.446636	0.429157	2.55267	-48.9378	-1.29224	0.626247	-21.8757
81.2	1.33834	2.29995	3.78609	3.77338	-47.1067	0.538818	-1.50998	-20.9602
81.25	-0.797894	-1.66734	0.429157	0.416443	-45.2757	1.45435	0.321072	-16.3825
81.3	3.16939	0.468891	0.734333	0.111267	-48.6326	-0.071533	3.37283	-21.5705
81.35	-0.187542	1.07924	4.39644	3.16303	-48.9378	-2.81812	-1.81516	-21.5705
81.4	-0.492718	-2.58287	1.34468	3.4682	-47.4119	-1.90259	-2.12033	-19.4343
81.45	4.08492	-0.14146	0.429157	0.416443	-43.4446	-1.90259	0.626247	-18.2136
81.5	-0.492718	2.29995	4.09127	0.721619	-46.1912	0.538818	0.321072	-21.8757
81.55	0.42281	-2.27769	0.734333	3.77338	-48.6326	1.14917	-3.34104	-21.8757
81.6	5.00045	0.468891	-0.48637	4.6889	-47.1067	-0.681885	-2.12033	-17.2981
81.65	-0.797894	3.52065	1.34468	0.111267	-44.055	-2.51294	-1.20481	-18.824
81.7	1.03316	-1.66734	2.26021	0.111267	-42.5291	-0.987061	-3.34104	-22.4861
81.75	4.69527	-0.14146	-2.01225	1.33197	-46.8016	1.14917	-0.594456	-22.1809
81.8	0.117634	2.9103	-0.48637	4.38373	-46.8016	3.59058	-2.73069	-19.1291
81.85	0.117634	-0.751812	3.78609	0.416443	-44.055	1.75952	-3.03586	-20.655
81.9	3.77974	-0.751812	-0.791546	-1.10944	-41.6136	-0.071533	2.76248	-23.4016
81.95	0.42281	2.9103	-0.48637	-0.193909	-42.2239	-0.071533	-3.64621	-21.2654
82	0.42281	-1.36216	1.95504	4.07855	-44.3602	-0.071533	-0.899632	-18.5188
82.05	4.69527	-0.751812	1.34468	2.2475	-42.8343	1.75952	0.015896	-20.9602
82.1	0.727985	2.9103	-1.4019	-0.193909	-41.3084	3.59058	-1.50998	-21.8757
82.15	0.727985	1.38442	0.429157	1.02679	-38.867	2.36987	1.54177	-21.2654
82.2	2.86422	0.163715	2.87056	3.16303	-40.3929	0.538818	-1.50998	-18.2136
82.25	1.33834	1.99477	-0.791546	4.99408	-42.2239	-0.681885	-0.899632	-21.2654
82.3	-0.797894	3.21547	0.123981	1.02679	-39.7825	-0.071533	1.84695	-22.7912
82.35	1.64351	-0.446636	2.26021	-0.499084	-37.6463	-0.376709	-0.899632	-22.1809
82.4	3.77974	0.468891	2.26021	1.02679	-34.8997	2.0647	1.2366	-19.4343
82.45	0.117634	4.131	-0.48637	3.16303	-36.7308	4.20093	-0.899632	-21.5705
82.5	1.94869	-0.446636	-0.181194	2.85785	-38.5618	2.0647	-1.50998	-24.3171
82.55	5.00045	-0.14146	4.39644	-0.499084	-36.4256	0.233643	4.59353	-24.3171
82.6	1.94869	2.29995	1.95504	0.416443	-35.5101	-0.376709	-1.50998	-20.9602
82.65	1.94869	1.99477	-0.48637	1.94232	-32.1531	0.843994	0.931423	-19.7395
82.7	3.47457	-1.05699	0.123981	4.6889	-33.0687	0.843994	3.98318	-23.0964
82.75	1.94869	0.163715	3.48091	1.33197	-34.8997	2.36987	0.321072	-23.7068
82.8	-0.797894	3.52065	1.03951	0.721619	-35.8152	2.36987	0.626247	-20.9602
82.85	2.25386	-1.66734	-1.09672	0.111267	-33.0687	-0.376709	2.15213	-18.5188
82.9	4.08492	-0.446636	0.123981	1.94232	-30.9324	-2.20776	-0.28928	-22.7912
82.95	-0.187542	1.99477	3.48091	4.6889	-29.4065	-1.90259	1.54177	-22.7912
83	0.42281	0.774067	0.123981	2.55267	-31.848	0.538818	1.54177	-22.7912
83.05	2.86422	-2.27769	-1.09672	-0.499084	-33.3738	2.0647	-1.20481	-18.5188
83.1	2.86422	-0.751812	0.429157	0.721619	-30.9324	-1.29224	2.76248	-21.2654
83.15	-0.187542	3.21547	4.09127	1.02679	-29.7117	-2.51294	3.98318	-23.7068
83.2	0.727985	-1.05699	0.734333	3.16303	-27.2703	-0.376709	-0.594456	-23.4016
83.25	4.08492	-1.66734	-0.791546	2.85785	-27.2703	3.2854	0.931423	-21.8757
83.3	-0.492718	-0.14146	-0.48637	-0.193909	-29.1014	-2.51294	4.59353	-18.5188
83.35	-0.797894	2.29995	3.48091	-0.80426	-30.0169	-2.20776	-0.899632	-20.9602
83.4	1.33834	-1.36216	0.734333	0.416443	-28.7962	1.75952	-0.899632	-22.1809
83.45	1.64351	-0.751812	-0.791546	1.63715	-27.2703	-1.59741	2.76248	-21.8757
83.5	-1.71342	0.468891	-1.70707	3.77338	-26.0496	-2.20776	-1.50998	-17.9084
83.55	-2.32377	1.68959	2.26021	2.2475	-24.2186	2.0647	-1.20481	-16.6877
83.6	2.25386	-0.446636	2.56539	-0.193909	-26.3548	-2.81812	2.15213	-19.1291
83.65	2.55904	-0.751812	-0.791546	-0.193909	-28.1858	-1.59741	2.15213	-20.655
83.7	-1.40824	1.07924	-1.4019	0.721619	-27.5755	2.0647	-0.899632	-19.1291
83.75	0.727985	1.38442	1.03951	2.85785	-27.5755	-1.90259	0.015896	-16.6877
83.8	4.39009	-0.751812	4.39644	2.85785	-26.0496	1.45435	5.20388	-16.6877
83.85	3.16939	-1.05699	-0.48637	0.416443	-25.4393	-0.071533	0.626247	-19.7395
83.9	0.727985	2.29995	-0.181194	-0.80426	-26.0496	-0.987061	0.015896	-21.2654
83.95	1.94869	2.29995	-0.181194	-0.499084	-27.5755	1.14917	2.4573	-20.0447
84	4.08492	-1.36216	2.87056	-0.193909	-28.1858	-3.12329	2.76248	-18.2136
84.05	1.33834	-1.36216	1.03951	1.63715	-27.8807	-0.376709	-2.12033	-15.7722
84.1	-0.797894	0.163715	-1.09672	4.07855	-26.3548	-3.12329	-0.594456	-18.5188
84.15	-0.797894	1.07924	1.03951	1.63715	-24.5237	-4.34399	3.37283	-20.3498
84.2	2.86422	-2.27769	1.34468	-1.10944	-23.303	-0.071533	-1.20481	-20.0447
84.25	0.727985	-2.27769	3.78609	-0.80426	-25.1341	-2.81812	-0.899632	-18.5188
84.3	-1.40824	-0.751812	0.734333	0.416443	-27.8807	-0.071533	0.626247	-15.467
84.35	-1.10307	1.07924	0.123981	1.94232	-26.9651	-3.42847	2.4573	-16.0774
84.4	1.33834	-1.66734	-0.181194	3.16303	-26.66	-2.20776	-1.50998	-19.4343
84.45	1.94869	-1.97252	1.34468	2.2475	-24.5237	1.14917	-1.50998	-19.4343
84.5	-1.71342	-0.14146	3.17574	0.416443	-22.6927	-2.51294	0.015896	-16.6877
84.55	-1.71342	2.29995	0.123981	-0.80426	-24.5237	1.14917	0.015896	-14.5515
84.6	0.42281	0.163715	-0.48637	0.416443	-25.4393	-2.51294	-2.12033	-13.636
84.65	1.94869	-1.36216	-0.181194	0.721619	-24.5237	-2.20776	-1.20481	-15.7722
84.7	-2.62895	-0.446636	1.95504	2.2475	-20.2513	1.45435	2.15213	-16.3825
84.75	-1.10307	2.60512	4.39644	4.99408	-23.303	-2.20776	-0.28928	-16.3825
84.8	-0.492718	1.07924	1.34468	4.6889	-23.9134	-0.681885	-0.899632	-15.1618
84.85	3.77974	-0.446636	0.429157	3.16303	-21.7771	1.14917	0.321072	-13.0256
84.9	1.33834	-0.14146	-0.181194	0.416443	-19.9461	-1.29224	3.37283	-11.4997
84.95	-0.492718	1.07924	1.64986	1.94232	-24.2186	2.36987	0.015896	-13.3308
85	0.117634	4.131	2.56539	2.2475	-21.472	1.14917	-2.12033	-15.467
85.05	1.64351	1.68959	1.95504	2.55267	-19.6409	-0.071533	0.015896	-15.7722
85.1	3.16939	-1.05699	-2.31743	4.38373	-23.303	2.98022	2.76248	-15.1618
85.15	-0.187542	-0.751812	-0.791546	5.29925	-20.2513	2.36987	-0.594456	-13.3308
85.2	-0.797894	1.38442	-1.09672	4.6889	-21.472	-0.071533	-1.81516	-10.5842
85.25	-0.187542	2.29995	1.34468	1.63715	-22.0823	2.67505	0.321072	-11.8049
85.3	3.77974	-1.36216	2.26021	0.721619	-19.3357	2.36987	2.15213	-13.0256
85.35	2.86422	-1.66734	-0.48637	1.02679	-23.303	-0.071533	-0.28928	-13.0256
85.4	-1.10307	-0.751812	-1.4019	1.63715	-21.472	2.36987	-0.899632	-12.4153
85.45	0.117634	1.07924	-1.4019	1.33197	-22.0823	0.843994	-0.28928	-12.4153
85.5	1.33834	2.29995	0.734333	1.94232	-23.9134	0.538818	1.84695	-9.97386
85.55	3.77974	-1.66734	1.64986	4.07855	-19.9461	1.75952	0.931423	-7.22728
85.6	0.117634	-1.05699	1.95504	4.99408	-23.6082	1.75952	-0.594456	-9.36351
85.65	-1.40824	-0.14146	-1.4019	3.16303	-20.8616	-1.90259	-0.594456	-12.7204
85.7	-1.40824	1.07924	-1.70707	0.721619	-22.3875	1.14917	1.54177	-14.8567
85.75	0.117634	2.9103	-0.48637	0.416443	-22.9979	2.0647	3.06765	-13.636
85.8	1.03316	0.163715	1.64986	0.416443	-17.1995	-2.20776	-0.594456	-14.2463
85.85	0.42281	-1.36216	2.87056	0.111267	-20.8616	-0.681885	-0.594456	-13.0256
85.9	-2.0186	-0.14146	2.56539	0.111267	-17.5047	2.98022	1.2366	-12.7204
85.95	-1.40824	1.07924	1.03951	1.02679	-19.6409	-1.29224	3.37283	-12.4153
86	-0.797894	4.131	-0.791546	2.85785	-19.6409	-0.071533	0.626247	-12.7204
86.05	1.64351	2.9103	0.123981	2.55267	-14.4529	3.59058	-1.50998	-14.8567
86.1	1.94869	0.468891	0.429157	4.38373	-19.9461	0.843994	0.015896	-14.8567
86.15	-1.71342	0.774067	1.95504	2.85785	-17.1995	-0.071533	2.4573	-14.5515
86.2	-2.0186	0.468891	2.56539	1.94232	-16.8943	1.45435	3.67801	-13.3308
86.25	-0.492718	2.9103	2.26021	0.416443	-19.0306	2.36987	0.931423	-11.8049
86.3	1.94869	4.43618	0.734333	-0.80426	-14.7581	-1.29224	0.015896	-10.5842
86.35	4.08492	1.07924	-0.48637	0.111267	-19.0306	-0.071533	-0.28928	-8.75315
86.4	1.94869	-0.446636	0.123981	0.416443	-19.6409	4.81128	1.84695	-8.1428
86.45	-0.187542	-0.446636	0.123981	1.63715	-15.0633	-0.681885	2.4573	-10.5842
86.5	-0.492718	0.774067	1.95504	1.63715	-19.9461	0.538818	-1.50998	-13.0256
86.55	0.727985	0.774067	2.56539	3.77338	-21.1668	3.59058	-2.73069	-13.3308
86.6	3.47457	4.131	2.56539	4.38373	-15.3685	4.20093	-1.81516	-11.1946
86.65	4.69527	1.99477	0.734333	0.721619	-20.8616	-0.987061	1.54177	-11.4997
86.7	1.94869	-0.751812	-0.48637	-0.80426	-20.2513	0.843994	1.84695	-11.4997
86.75	0.42281	-1.05699	-0.791546	-0.193909	-15.9788	5.11646	-1.20481	-10.8894
86.8	0.727985	-0.751812	-0.791546	3.4682	-20.8616	-0.071533	-2.12033	-9.05833
86.85	0.727985	1.68959	1.03951	3.4682	-19.3357	-1.29224	-0.28928	-10.279
86.9	2.55904	3.82583	2.26021	-0.499084	-15.0633	1.45435	1.84695	-10.5842
86.95	4.69527	1.07924	3.78609	-0.80426	-18.4202	2.67505	2.76248	-13.636
87	2.86422	-1.36216	2.26021	2.2475	-18.7254	-1.59741	0.015896	-15.1618
87.05	-0.797894	-1.97252	1.34468	2.2475	-14.7581	-0.376709	-0.594456	-14.2463
87.1	-0.492718	-0.751812	0.429157	-0.499084	-17.8099	2.98022	0.931423	-13.636
87.15	0.42281	-0.446636	0.429157	0.416443	-18.4202	2.0647	2.15213	-13.636
87.2	0.727985	1.38442	1.03951	4.07855	-16.284	-0.376709	3.67801	-12.1101
87.25	1.64351	2.9103	1.64986	0.111267	-17.8099	1.45435	1.54177	-10.8894
87.3	1.94869	1.07924	2.56539	1.02679	-18.7254	4.20093	-0.594456	-11.1946
87.35	1.33834	-0.751812	3.48091	4.99408	-16.8943	0.233643	-0.28928	-14.2463
87.4	-1.10307	-0.751812	3.78609	-0.193909	-14.4529	0.538818	-0.899632	-12.7204
87.45	-0.797894	-0.14146	2.56539	1.33197	-18.7254	1.75952	0.626247	-10.8894
87.5	-0.492718	1.99477	1.03951	5.90961	-16.8943	4.5061	2.4573	-7.22728
87.55	0.42281	2.9103	-0.181194	0.721619	-11.7063	0.538818	0.321072	-10.5842
87.6	2.25386	-0.446636	-0.181194	2.2475	-17.1995	0.538818	-3.03586	-10.5842
87.65	3.47457	-1.66734	0.123981	1.94232	-16.8943	2.67505	-1.20481	-8.44798
87.7	1.33834	-0.751812	-0.181194	-0.193909	-13.8426	4.20093	-0.594456	-5.7014
87.75	-1.10307	2.29995	1.64986	2.55267	-15.6736	0.843994	1.84695	-10.5842
87.8	-0.492718	-1.97252	2.26021	0.416443	-19.0306	1.45435	3.06765	-9.36351
87.85	0.727985	-1.66734	3.78609	0.416443	-16.284	2.36987	-0.594456	-3.25999
87.9	1.64351	1.38442	0.429157	4.07855	-13.8426	4.81128	-2.12033	-8.1428
87.95	4.08492	1.68959	-1.4019	-0.80426	-17.8099	1.45435	-1.81516	-8.75315
88	0.42281	-1.66734	-1.09672	0.416443	-18.115	1.45435	-2.73069	-3.87034
88.05	-0.187542	1.38442	-0.48637	5.29925	-13.8426	2.98022	-1.50998	-8.1428
88.1	-0.492718	1.68959	3.78609	0.111267	-14.7581	5.42163	1.2366	-7.53245
88.15	2.86422	-0.751812	2.87056	2.2475	-17.1995	2.36987	0.931423	-5.09105
88.2	0.117634	2.60512	-0.48637	4.6889	-15.3685	0.233643	-2.12033	-9.66868
88.25	-0.492718	-1.36216	0.123981	0.416443	-13.2322	1.75952	-3.03586	-7.83763
88.3	0.42281	-0.446636	3.78609	1.94232	-16.5892	4.20093	-2.12033	-6.61692
88.35	2.86422	3.52065	3.17574	4.6889	-17.1995	3.2854	-1.81516	-9.66868
88.4	-0.187542	-1.36216	-1.4019	1.02679	-14.1478	0.843994	-0.594456	-6.00657
88.45	1.33834	2.9103	1.03951	0.111267	-13.2322	1.45435	0.931423	-9.97386
88.5	3.47457	0.163715	3.78609	5.29925	-15.9788	4.20093	0.015896	-9.97386
88.55	-0.797894	0.468891	-1.09672	1.94232	-14.7581	4.81128	-1.20481	-6.00657
88.6	3.77974	4.131	0.123981	1.02679	-10.1805	0.538818	-1.81516	-11.8049
88.65	1.64351	-0.446636	3.17574	3.4682	-12.9271	0.233643	-1.20481	-10.279
88.7	-0.492718	2.60512	-1.70707	3.4682	-14.7581	1.45435	-1.20481	-7.53245
88.75	3.16939	-0.751812	0.734333	1.33197	-12.3167	4.81128	0.626247	-11.8049
88.8	-1.71342	-0.14146	4.09127	1.63715	-8.34942	2.36987	3.06765	-11.1946
88.85	1.03316	1.68959	-1.09672	5.29925	-13.2322	0.233643	2.4573	-8.1428
88.9	2.25386	-1.05699	1.95504	1.63715	-13.8426	1.45435	1.54177	-12.1101
88.95	-0.797894	3.52065	0.429157	1.63715	-12.0115	2.67505	0.015896	-9.97386
89	3.47457	-0.446636	-0.791546	2.2475	-9.26494	3.59058	-0.899632	-7.53245
89.05	-0.797894	0.774067	2.56539	4.6889	-13.5374	0.843994	0.015896	-11.1946
89.1	0.727985	2.60512	-0.791546	0.111267	-14.1478	-1.29224	0.321072	-9.36351
89.15	1.94869	-0.751812	-0.181194	0.416443	-11.096	-1.29224	1.2366	-6.61692
89.2	-1.10307	2.9103	2.56539	1.94232	-8.65459	0.538818	2.4573	-10.5842
89.25	4.39009	-1.05699	-1.70707	1.63715	-13.2322	2.98022	0.931423	-11.1946
89.3	-1.10307	-2.88804	1.03951	-0.80426	-12.9271	-0.987061	-2.42551	-7.53245
89.35	0.117634	2.9103	0.429157	0.111267	-10.4856	-1.29224	-2.42551	-9.97386
89.4	1.33834	-2.58287	-1.09672	3.4682	-8.65459	0.538818	-1.81516	-12.7204
89.45	-0.797894	-1.66734	2.26021	1.33197	-12.0115	3.89575	0.015896	-9.97386
89.5	3.47457	1.38442	-1.4019	-0.193909	-13.2322	4.81128	0.931423	-7.83763
89.55	-1.10307	-1.97252	-1.4019	1.02679	-11.096	0.538818	-1.50998	-10.5842
89.6	-0.492718	-0.751812	3.48091	4.07855	-8.04424	-0.376709	-1.20481	-10.5842
89.65	5.00045	1.99477	-1.4019	1.33197	-11.4012	-0.376709	1.2366	-6.31175
89.7	-0.492718	-2.27769	-0.791546	-0.193909	-13.8426	1.45435	3.06765	-8.44798
89.75	0.42281	0.163715	4.39644	1.33197	-12.0115	3.59058	-1.50998	-9.66868
89.8	2.86422	2.29995	0.429157	4.6889	-8.95977	1.45435	-0.28928	-8.1428
89.85	-0.187542	-1.97252	0.734333	1.94232	-9.87529	-2.20776	2.76248	-5.39622
89.9	2.25386	-0.446636	4.39644	-0.80426	-12.6219	-0.071533	-2.42551	-9.66868
89.95	3.47457	1.07924	1.03951	0.721619	-12.3167	0.233643	-2.12033	-10.8894
90	-0.797894	-1.36216	0.429157	5.29925	-9.87529	3.2854	2.76248	-8.75315
90.05	1.64351	0.468891	2.87056	3.4682	-6.82354	4.20093	-2.42551	-6.9221
90.1	3.77974	4.131	2.87056	-0.193909	-11.096	2.0647	-1.20481	-10.279
90.15	-0.492718	-1.05699	-1.09672	0.721619	-11.7063	2.0647	0.931423	-9.97386
90.2	0.727985	0.163715	0.734333	2.85785	-11.096	2.0647	-2.42551	-7.83763
90.25	3.47457	4.43618	3.78609	3.16303	-8.95977	4.20093	0.626247	-7.53245
90.3	-0.187542	0.774067	-0.791546	0.111267	-8.65459	6.33716	-1.50998	-10.8894
90.35	0.727985	0.468891	-0.791546	0.111267	-12.9271	5.72681	-2.12033	-10.5842
90.4	4.08492	3.82583	1.64986	1.63715	-12.9271	1.14917	1.84695	-7.83763
90.45	-0.492718	1.38442	1.03951	4.07855	-11.4012	0.233643	-3.64621	-7.53245
90.5	0.727985	-1.36216	-1.70707	-0.193909	-9.26494	0.843994	-0.899632	-11.4997
90.55	4.69527	0.774067	-0.181194	0.111267	-10.4856	2.0647	-1.81516	-9.66868
90.6	0.42281	2.60512	3.48091	1.02679	-12.6219	2.67505	-2.42551	-7.83763
90.65	-0.187542	-2.27769	-0.48637	2.55267	-12.3167	3.59058	1.2366	-6.31175
90.7	3.16939	-1.66734	-1.4019	2.55267	-10.4856	2.67505	-4.56174	-10.5842
90.75	2.55904	1.38442	0.123981	1.33197	-8.34942	0.233643	-2.42551	-9.97386
90.8	-1.71342	-2.27769	2.26021	0.416443	-9.87529	-0.376709	-0.594456	-8.1428
90.85	1.33834	-2.58287	-1.70707	1.02679	-12.0115	-0.376709	-3.64621	-6.00657
90.9	3.16939	-0.446636	-1.4019	3.77338	-11.7063	1.45435	0.626247	-10.279
90.95	-1.71342	-1.05699	0.429157	1.63715	-10.7908	3.2854	-2.42551	-11.8049
91	-1.71342	-2.88804	1.03951	0.111267	-7.73906	2.0647	-2.12033	-9.97386
91.05	1.94869	-0.14146	-2.01225	0.721619	-8.65459	-0.681885	2.76248	-6.61692
91.1	-0.492718	1.99477	-1.4019	1.94232	-11.4012	-2.51294	-1.50998	-9.97386
91.15	-1.71342	-1.66734	2.56539	4.38373	-11.7063	-1.59741	-1.20481	-11.4997
91.2	0.117634	-0.751812	0.429157	2.2475	-12.3167	-0.987061	2.76248	-9.97386
91.25	1.33834	1.68959	-1.70707	1.33197	-9.57012	0.843994	-1.50998	-7.22728
91.3	-1.40824	1.38442	-1.4019	1.94232	-8.34942	0.538818	-1.81516	-7.53245
91.35	-0.492718	-1.97252	2.87056	2.55267	-12.6219	-3.12329	1.84695	-10.5842
91.4	3.77974	-0.446636	0.123981	4.99408	-13.5374	-3.12329	-1.81516	-10.8894
91.45	0.727985	2.9103	-2.01225	3.4682	-12.9271	-1.59741	-1.50998	-9.66868
91.5	-0.187542	-0.751812	0.123981	0.111267	-11.7063	2.67505	2.76248	-7.22728
91.55	1.94869	-1.36216	2.87056	0.111267	-10.1805	-0.987061	-0.594456	-8.75315
91.6	4.08492	0.468891	0.123981	1.63715	-10.7908	-0.681885	0.015896	-9.97386
91.65	-0.187542	2.29995	-1.09672	4.6889	-13.5374	1.75952	2.4573	-9.05833
91.7	-0.797894	-1.05699	0.123981	3.16303	-13.8426	2.36987	1.54177	-8.1428
91.75	1.94869	-1.05699	2.87056	-0.193909	-14.4529	0.538818	-2.12033	-5.09105
91.8	2.25386	2.60512	1.95504	0.111267	-11.7063	2.0647	-0.28928	-8.1428
91.85	-0.797894	1.99477	-1.4019	0.721619	-9.26494	2.67505	1.54177	-8.75315
91.9	-0.797894	-0.751812	-0.791546	1.63715	-11.096	-1.29224	-2.42551	-8.75315
91.95	3.77974	-1.05699	1.03951	3.4682	-12.6219	2.67505	-2.42551	-6.9221
92	1.33834	2.60512	1.34468	2.2475	-13.2322	0.233643	1.54177	-4.48069
92.05	-1.10307	1.38442	-1.4019	-0.499084	-10.1805	-0.681885	-0.594456	-7.53245
92.1	0.42281	-1.36216	-1.70707	-0.499084	-8.34942	3.2854	-1.20481	-8.75315
92.15	4.08492	-0.446636	-0.48637	0.416443	-7.12871	-0.987061	0.626247	-8.1428
92.2	0.42281	3.21547	2.56539	2.55267	-6.51836	2.67505	2.76248	-7.22728
92.25	-0.797894	1.68959	-0.181194	4.07855	-8.95977	2.67505	-1.81516	-4.48069
92.3	0.42281	-1.05699	-0.181194	1.63715	-11.096	0.843994	0.626247	-7.53245
92.35	4.39009	-0.446636	-0.48637	0.416443	-11.4012	5.72681	3.98318	-9.66868
92.4	-0.797894	2.9103	2.26021	0.111267	-11.7063	0.233643	0.626247	-9.97386
92.45	-1.40824	1.07924	2.87056	1.33197	-10.7908	3.89575	-1.50998	-7.83763
92.5	-0.187542	-1.97252	0.123981	2.85785	-8.65459	1.75952	0.626247	-4.78587
92.55	3.77974	-1.66734	0.429157	4.99408	-8.95977	1.45435	3.37283	-8.75315
92.6	0.727985	1.68959	1.34468	2.85785	-11.4012	4.20093	-2.12033	-10.5842
92.65	-0.797894	2.60512	3.17574	0.416443	-13.2322	1.14917	-1.50998	-10.279
92.7	-0.187542	-0.14146	1.34468	0.416443	-12.3167	4.20093	0.015896	-10.279
92.75	4.39009	0.774067	-1.4019	1.02679	-11.096	2.36987	0.321072	-8.75315
92.8	1.33834	2.60512	-0.48637	0.721619	-8.34942	2.67505	-3.64621	-6.9221
92.85	-0.797894	3.21547	1.03951	3.4682	-9.57012	7.25269	-2.12033	-9.05833
92.9	0.727985	1.07924	3.48091	5.60443	-12.9271	1.14917	1.54177	-9.66868
92.95	3.47457	1.07924	1.64986	2.2475	-11.4012	4.5061	-1.50998	-8.1428
93	4.39009	1.99477	-1.4019	0.416443	-10.7908	3.59058	-3.95139	-8.44798
93.05	2.25386	4.43618	0.734333	0.416443	-8.95977	0.843994	-3.34104	-5.7014
93.1	2.25386	2.29995	2.26021	0.721619	-12.9271	4.20093	0.931423	-5.09105
93.15	3.16939	0.774067	4.39644	0.721619	-12.3167	-1.29224	-2.12033	-8.44798
93.2	5.6108	0.468891	1.95504	1.63715	-9.87529	-0.071533	-3.03586	-9.66868
93.25	1.33834	2.9103	-0.791546	4.07855	-12.6219	3.59058	-1.81516	-9.05833
93.3	0.117634	3.82583	1.03951	2.2475	-12.3167	-1.90259	3.37283	-7.22728
93.35	0.42281	-0.751812	1.03951	-0.80426	-8.65459	-0.681885	-0.594456	-6.00657
93.4	3.47457	-1.97252	3.48091	-1.71979	-11.096	2.98022	-2.12033	-3.25999
93.45	1.33834	-1.05699	1.64986	-0.193909	-12.6219	-0.681885	-0.899632	-5.7014
93.5	-2.0186	2.60512	0.429157	-0.80426	-5.60283	0.843994	2.4573	-6.61692
93.55	-1.40824	1.38442	-1.4019	0.721619	-12.9271	4.81128	-1.81516	-6.31175
93.6	-0.187542	-1.97252	-0.48637	1.33197	-10.1805	0.233643	-2.73069	-5.09105
93.65	1.94869	-0.751812	1.64986	2.85785	-9.26494	1.75952	-0.899632	-4.78587
93.7	-0.187542	1.68959	3.78609	1.63715	-11.096	5.42163	1.54177	-4.48069
93.75	-2.62895	4.43618	1.64986	-0.193909	-6.82354	1.14917	0.015896	-2.03929
93.8	-0.797894	1.38442	0.123981	-2.02496	-11.096	0.843994	-2.12033	-5.7014
93.85	1.33834	-0.751812	0.734333	-1.41461	-10.1805	5.11646	-1.81516	-7.53245
93.9	2.55904	-0.751812	1.34468	-0.499084	-8.34942	1.14917	1.84695	-8.75315
93.95	0.117634	1.68959	3.48091	0.721619	-10.4856	2.0647	0.015896	-7.53245
94	-1.40824	3.82583	4.70162	1.33197	-5.90801	5.72681	-2.42551	-8.44798
94.05	0.117634	1.99477	1.64986	2.85785	-10.4856	2.67505	-3.64621	-6.9221
94.1	1.33834	-0.751812	-0.48637	4.6889	-8.34942	2.67505	-0.899632	-6.00657
94.15	3.16939	0.163715	0.429157	3.4682	-8.04424	5.11646	0.626247	-6.31175
94.2	0.42281	0.774067	1.34468	0.111267	-9.57012	3.2854	-1.81516	-9.05833
94.25	-0.797894	2.9103	1.64986	-0.80426	-5.90801	1.75952	-3.64621	-10.5842
94.3	0.42281	2.29995	4.09127	-1.71979	-10.4856	3.2854	-2.73069	-9.66868
94.35	0.727985	-1.05699	0.734333	-0.80426	-8.95977	2.98022	1.2366	-9.36351
94.4	3.47457	-2.27769	-1.4019	-1.10944	-7.43389	-0.681885	-0.28928	-8.1428
94.45	1.33834	-2.27769	-2.01225	-0.499084	-11.4012	0.843994	-3.03586	-6.61692
94.5	-1.10307	-1.05699	-1.09672	1.02679	-6.82354	5.11646	-2.73069	-2.95481
94.55	-2.0186	1.99477	0.123981	1.94232	-11.096	-0.071533	-0.594456	-3.25999
94.6	-1.10307	-0.446636	2.56539	1.94232	-10.4856	0.233643	2.4573	-6.31175
94.65	1.03316	-3.49839	1.64986	3.16303	-7.43389	4.20093	-0.594456	-6.31175
94.7	1.33834	-2.27769	-1.09672	1.94232	-11.4012	3.89575	-3.64621	-6.9221
94.75	-1.71342	-0.14146	-2.31743	-0.193909	-9.26494	1.75952	-2.12033	-6.00657
94.8	-2.0186	1.68959	-1.70707	-1.10944	-5.90801	2.67505	1.2366	-5.39622
94.85	-0.492718	2.9103	-1.4019	-0.499084	-10.1805	5.11646	3.98318	-6.31175
94.9	-0.187542	0.163715	0.734333	-0.193909	-8.95977	0.538818	0.321072	-6.00657
94.95	2.25386	-1.36216	1.95504	1.63715	-4.38213	0.843994	-0.899632	-5.7014
95	1.64351	-0.446636	2.26021	2.55267	-10.1805	2.98022	0.015896	-5.09105
95.05	0.117634	-0.446636	0.429157	0.416443	-8.04424	0.843994	2.15213	-8.1428
95.1	-2.32377	1.38442	-1.70707	-1.71979	-5.29766	-1.59741	4.28836	-9.66868
95.15	-1.71342	2.60512	-1.70707	0.111267	-9.87529	-0.071533	0.015896	-10.5842
95.2	-0.797894	1.68959	-1.09672	2.85785	-8.34942	3.59058	-1.50998	-10.279
95.25	0.727985	0.163715	0.429157	3.77338	-5.29766	-0.987061	-0.899632	-9.97386
95.3	2.25386	-0.14146	0.734333	1.02679	-8.65459	-0.681885	-0.899632	-9.05833
95.35	-1.10307	0.468891	2.87056	1.33197	-9.26494	2.67505	1.54177	-7.53245
95.4	-1.40824	1.68959	2.26021	4.07855	-5.29766	2.67505	-1.20481	-6.9221
95.45	-2.0186	3.82583	-0.181194	1.94232	-8.34942	-0.681885	-3.95139	-5.39622
95.5	-1.10307	3.52065	-2.31743	-0.193909	-8.04424	-0.071533	-3.34104	-7.83763
95.55	0.727985	2.29995	-1.70707	2.2475	-4.38213	2.67505	-2.12033	-9.97386
95.6	2.25386	-0.446636	-0.791546	1.63715	-7.12871	0.538818	0.626247	-10.279
95.65	1.03316	-1.05699	-1.09672	-2.33014	-8.95977	-1.90259	0.931423	-9.36351
95.7	-0.187542	-1.66734	0.123981	0.721619	-7.12871	-0.376709	-0.899632	-7.22728
95.75	-0.492718	0.468891	1.03951	1.94232	-6.21318	1.75952	-2.42551	-4.48069
95.8	-1.40824	2.60512	3.48091	-0.80426	-9.87529	-0.987061	0.321072	-8.1428
95.85	-0.797894	-0.751812	1.64986	1.33197	-9.26494	-2.51294	1.2366	-9.36351
95.9	0.727985	-3.19322	-0.48637	0.111267	-6.82354	-0.681885	3.98318	-7.53245
95.95	1.94869	-2.58287	-2.6226	-1.10944	-10.7908	2.98022	3.67801	-4.17552
96	-0.492718	0.468891	-1.70707	2.85785	-9.57012	0.538818	0.931423	-8.44798
96.05	-2.32377	0.468891	-1.4019	-1.10944	-4.99248	-0.987061	0.015896	-8.75315
96.1	-3.2393	-3.19322	-1.4019	-1.10944	-6.82354	0.843994	1.54177	-4.78587
96.15	-2.62895	-2.88804	-0.181194	3.4682	-8.04424	4.5061	1.2366	-7.53245
96.2	-2.32377	1.38442	1.34468	-1.10944	-5.29766	2.0647	2.4573	-9.05833
96.25	-0.797894	-1.66734	2.26021	1.02679	-3.16143	-0.071533	3.67801	-5.39622
96.3	-0.187542	-2.58287	-1.09672	2.85785	-7.43389	0.233643	1.2366	-9.05833
96.35	-3.84965	1.68959	-2.6226	-0.499084	-6.51836	3.59058	-1.20481	-10.279
96.4	-3.84965	-1.97252	-1.70707	1.63715	-3.4666	2.0647	-0.28928	-5.39622
96.45	-2.93412	-1.36216	1.03951	2.2475	-4.99248	-0.681885	0.015896	-8.44798
96.5	0.727985	2.60512	3.17574	-0.80426	-7.43389	-0.681885	1.84695	-8.75315
96.55	-3.84965	-2.27769	-0.181194	0.721619	-5.60283	2.67505	3.67801	-3.87034
96.6	-2.62895	-0.751812	-1.4019	1.94232	-3.77178	2.36987	3.37283	-8.75315
96.65	0.727985	1.07924	1.03951	-0.80426	-8.04424	-1.29224	0.931423	-7.83763
96.7	-2.32377	-1.05699	3.48091	0.721619	-7.12871	0.233643	-0.28928	-6.00657
96.75	-2.62895	1.38442	-2.01225	3.77338	-5.29766	2.36987	-0.899632	-9.36351
96.8	0.42281	-1.36216	-1.4019	-1.10944	-4.99248	5.72681	-0.594456	-6.61692
96.85	-1.71342	-0.751812	2.87056	-0.499084	-9.26494	0.538818	-0.28928	-7.53245
96.9	-2.62895	2.29995	-0.791546	4.07855	-7.73906	0.538818	0.931423	-9.36351
96.95	2.25386	-2.58287	-2.01225	-0.193909	-5.29766	2.0647	0.015896	-4.48069
97	-2.32377	3.52065	2.87056	0.721619	-6.51836	4.5061	-2.42551	-7.83763
97.05	-2.0186	-1.66734	-0.48637	2.55267	-8.04424	2.98022	-4.25657	-7.83763
97.1	0.727985	0.468891	-0.791546	2.55267	-7.73906	0.233643	-3.95139	-2.95481
97.15	-3.54448	-0.14146	3.17574	-1.10944	-4.68731	1.14917	-4.25657	-8.1428
97.2	-0.187542	-2.27769	-2.01225	0.721619	-8.34942	2.36987	-3.95139	-6.9221
97.25	-3.54448	3.52065	1.34468	4.07855	-9.26494	3.89575	-0.899632	-3.56517
97.3	-2.93412	-1.97252	1.95504	-0.193909	-7.12871	1.14917	1.54177	-8.75315
97.35	1.03316	0.163715	-0.791546	-1.10944	-4.99248	-0.681885	1.2366	-8.1428
97.4	-3.84965	-1.05699	1.64986	1.63715	-8.65459	0.538818	-0.28928	-4.17552
97.45	0.727985	-2.27769	0.123981	3.4682	-9.26494	1.75952	-2.42551	-9.05833
97.5	-2.32377	2.60512	-0.48637	-0.193909	-7.73906	3.89575	-1.81516	-9.05833
97.55	-1.40824	-2.58287	4.09127	0.111267	-4.68731	0.843994	0.015896	-5.09105
97.6	1.64351	-1.05699	-0.791546	1.33197	-7.73906	-0.987061	0.626247	-8.44798
97.65	-2.62895	1.99477	0.734333	2.2475	-9.26494	0.538818	2.4573	-9.97386
97.7	1.64351	-0.751812	3.48091	-0.193909	-7.43389	1.45435	2.15213	-7.53245
97.75	-1.10307	1.38442	-0.181194	-0.499084	-4.07695	4.20093	0.015896	-6.61692
97.8	-2.0186	2.9103	2.26021	2.55267	-7.12871	0.843994	-1.81516	-10.279
97.85	1.94869	-0.751812	1.34468	2.85785	-9.57012	0.538818	-0.28928	-9.05833
97.9	-2.93412	2.9103	-1.4019	0.111267	-8.95977	0.233643	2.15213	-5.39622
97.95	-2.0186	2.60512	1.95504	-0.193909	-4.68731	3.2854	-0.899632	-7.53245
98	0.117634	-0.751812	-0.48637	3.4682	-7.43389	5.11646	-3.03586	-9.36351
98.05	-2.62895	1.68959	-2.31743	2.55267	-9.57012	3.89575	0.015896	-6.9221
98.1	-0.797894	1.68959	0.123981	0.111267	-9.26494	0.233643	0.626247	-5.09105
98.15	0.117634	-0.446636	1.03951	0.416443	-6.51836	0.538818	-3.03586	-9.36351
98.2	-2.0186	0.774067	-3.53813	2.2475	-5.29766	1.14917	-1.81516	-9.36351
98.25	0.42281	1.07924	-1.70707	3.4682	-9.57012	3.59058	0.626247	-6.00657
98.3	-1.71342	-1.05699	1.95504	-1.10944	-8.65459	3.2854	-2.73069	-5.09105
98.35	-2.62895	0.163715	-1.70707	-0.193909	-7.12871	0.843994	-2.42551	-9.66868
98.4	-0.797894	1.07924	-1.70707	0.721619	-4.38213	0.843994	-0.594456	-8.75315
98.45	-1.71342	-3.19322	2.87056	4.38373	-7.12871	1.14917	-3.64621	-5.09105
98.5	-4.46	-0.446636	-0.181194	0.416443	-8.04424	2.0647	-0.28928	-6.61692
98.55	-1.10307	1.99477	-0.48637	0.721619	-8.95977	3.89575	-1.50998	-9.36351
98.6	-0.492718	-2.58287	1.34468	1.63715	-7.12871	6.03198	-1.81516	-8.1428
98.65	-3.2393	-1.36216	1.64986	4.99408	-4.68731	2.0647	2.76248	-4.78587
98.7	-1.71342	2.60512	-1.09672	2.55267	-7.12871	2.0647	-3.03586	-7.22728
98.75	0.727985	-1.05699	0.429157	0.111267	-8.95977	2.36987	0.015896	-8.44798
98.8	-2.32377	-0.751812	4.39644	1.33197	-8.34942	2.67505	0.931423	-7.53245
98.85	-0.187542	2.9103	1.64986	2.55267	-5.90801	4.20093	-2.12033	-3.56517
98.9	1.94869	0.774067	0.123981	4.6889	-5.29766	5.11646	3.37283	-6.9221
98.95	-2.62895	-0.446636	2.56539	1.33197	-7.12871	3.59058	-1.50998	-8.44798
99	-2.0186	1.07924	4.09127	0.416443	-7.73906	0.843994	0.626247	-7.53245
99.05	1.94869	2.60512	0.429157	1.63715	-7.12871	1.45435	2.15213	-4.17552
99.1	-1.40824	-1.36216	0.429157	4.07855	-5.29766	2.0647	-1.20481	-6.31175
99.15	-2.32377	0.774067	2.56539	3.4682	-4.07695	2.0647	3.06765	-8.75315
99.2	-0.187542	4.43618	3.17574	-0.80426	-5.60283	3.2854	-0.899632	-9.66868
99.25	1.03316	0.468891	-0.791546	0.416443	-8.34942	2.67505	-2.42551	-5.7014
99.3	-1.71342	-0.14146	-0.791546	1.94232	-6.21318	-0.071533	2.4573	-6.00657
99.35	-1.10307	1.99477	1.95504	3.77338	-4.68731	-1.90259	-3.34104	-9.05833
99.4	3.16939	1.68959	0.734333	1.02679	-1.94072	-1.90259	-2.73069	-9.66868
99.45	-1.71342	-2.58287	-2.6226	-0.80426	-5.29766	-0.376709	0.015896	-7.83763
99.5	-1.40824	-0.751812	-1.70707	0.416443	-7.12871	1.75952	-4.86692	-4.78587
99.55	0.727985	2.60512	1.95504	1.02679	-6.21318	3.59058	-1.81516	-9.05833
99.6	0.727985	-1.05699	-0.791546	1.94232	-5.60283	0.843994	1.54177	-9.66868
99.65	-2.32377	-2.88804	-3.23295	0.111267	-4.38213	1.45435	-3.34104	-7.53245
99.7	-0.797894	0.163715	-2.01225	-0.80426	-4.68731	2.36987	-3.03586	-3.87034
99.75	1.03316	1.07924	2.26021	-0.499084	-6.51836	3.59058	2.15213	-4.78587
99.8	-1.71342	-2.88804	-1.09672	0.416443	-8.34942	4.81128	-2.42551	-6.9221
99.85	-1.40824	-1.66734	-2.6226	2.85785	-8.65459	0.843994	-2.42551	-5.09105
99.9	0.42281	1.38442	-2.31743	2.85785	-8.04424	1.45435	1.84695	-3.25999
[truncated: 3,008 more rows]

## Sheet: Fig. 1 supl 5d
Time	MP (mV)								Time	MP (mV)
0.05	-53.4668								0.05	-53.009
0.1	-53.7109								0.1	-52.948
0.15	-53.6499								0.15	-52.887
0.2	-53.6804								0.2	-52.7344
0.25	-53.6194								0.25	-52.5818
0.3	-53.5583								0.3	-52.948
0.35	-53.4363								0.35	-53.1006
0.4	-53.3752								0.4	-53.009
0.45	-53.4668								0.45	-52.948
0.5	-53.6804								0.5	-52.7954
0.55	-53.6499								0.55	-52.6733
0.6	-53.6804								0.6	-52.8564
0.65	-53.4668								0.65	-53.1311
0.7	-53.4058								0.7	-53.1006
0.75	-53.7415								0.75	-52.9785
0.8	-53.7109								0.8	-52.9175
0.85	-53.4058								0.85	-52.8564
0.9	-53.5278								0.9	-52.7649
0.95	-53.6804								0.95	-52.8259
1	-53.4668								1	-53.0701
1.05	-53.7109								1.05	-53.1311
1.1	-53.6804								1.1	-53.009
1.15	-53.3447								1.15	-52.948
1.2	-53.6804								1.2	-52.887
1.25	-53.7109								1.25	-52.5513
1.3	-53.4058								1.3	-52.887
1.35	-53.772								1.35	-52.887
1.4	-53.5278								1.4	-53.0701
1.45	-53.6194								1.45	-53.0395
1.5	-53.772								1.5	-52.9785
1.55	-53.3752								1.55	-52.948
1.6	-53.772								1.6	-52.7649
1.65	-53.5278								1.65	-52.6733
1.7	-53.6499								1.7	-52.8564
1.75	-53.7415								1.75	-53.0701
1.8	-53.3447								1.8	-52.948
1.85	-53.772								1.85	-52.887
1.9	-53.5889								1.9	-52.6123
1.95	-53.4973								1.95	-53.0701
2	-53.6499								2	-52.948
2.05	-53.5278								2.05	-52.7649
2.1	-53.7109								2.1	-52.7649
2.15	-53.8025								2.15	-53.0395
2.2	-53.4668								2.2	-52.887
2.25	-53.8635								2.25	-52.7649
2.3	-53.8025								2.3	-53.1006
2.35	-53.4363								2.35	-52.7649
2.4	-53.7415								2.4	-52.9785
2.45	-53.833								2.45	-52.948
2.5	-53.4973								2.5	-52.7039
2.55	-53.7415								2.55	-53.1311
2.6	-53.772								2.6	-52.8564
2.65	-53.5583								2.65	-53.009
2.7	-53.6499								2.7	-53.1921
2.75	-53.772								2.75	-52.7039
2.8	-53.6194								2.8	-53.1311
2.85	-53.4668								2.85	-52.8564
2.9	-53.8635								2.9	-53.0395
2.95	-53.7109								2.95	-53.1311
3	-53.3142								3	-52.6428
3.05	-53.833								3.05	-53.1311
3.1	-53.772								3.1	-52.9175
3.15	-53.4363								3.15	-52.887
3.2	-53.6194								3.2	-53.0701
3.25	-53.772								3.25	-52.7039
3.3	-53.6804								3.3	-53.0395
3.35	-53.4058								3.35	-53.0701
3.4	-53.8025								3.4	-52.6123
3.45	-53.6804								3.45	-53.009
3.5	-53.4668								3.5	-53.009
3.55	-53.6499								3.55	-52.5513
3.6	-53.772								3.6	-53.009
3.65	-53.4973								3.65	-52.9785
3.7	-53.3142								3.7	-52.5513
3.75	-53.772								3.75	-52.948
3.8	-53.772								3.8	-53.0395
3.85	-53.4973								3.85	-52.7039
3.9	-53.5278								3.9	-52.8259
3.95	-53.8025								3.95	-52.948
4	-53.7415								4	-52.7344
4.05	-53.4363								4.05	-52.7954
4.1	-53.7415								4.1	-53.0395
4.15	-53.894								4.15	-52.887
4.2	-53.7109								4.2	-52.6428
4.25	-53.4668								4.25	-53.0395
4.3	-53.833								4.3	-52.887
4.35	-53.894								4.35	-52.6123
4.4	-53.6804								4.4	-53.009
4.45	-53.4668								4.45	-52.948
4.5	-53.8635								4.5	-52.7649
4.55	-54.0161								4.55	-52.887
4.6	-53.772								4.6	-53.0701
4.65	-53.4973								4.65	-52.7954
4.7	-53.8635								4.7	-52.5207
4.75	-53.9551								4.75	-53.0395
4.8	-53.8025								4.8	-53.0395
4.85	-53.5583								4.85	-52.6428
4.9	-53.8635								4.9	-52.7344
4.95	-54.0771								4.95	-53.009
5	-53.8635								5	-52.8564
5.05	-53.6194								5.05	-52.4292
5.1	-53.6804								5.1	-52.887
5.15	-54.0161								5.15	-52.9785
5.2	-53.8635								5.2	-52.7649
5.25	-53.7415								5.25	-52.6123
5.3	-53.6194								5.3	-52.9175
5.35	-53.894								5.35	-52.9785
5.4	-53.9246								5.4	-52.6123
5.45	-53.8025								5.45	-52.6733
5.5	-53.4973								5.5	-52.948
5.55	-53.7415								5.55	-52.887
5.6	-54.0161								5.6	-52.5818
5.65	-53.9246								5.65	-52.8564
5.7	-53.7109								5.7	-52.9175
5.75	-53.5278								5.75	-52.8564
5.8	-53.9246								5.8	-52.4902
5.85	-53.9551								5.85	-52.7954
5.9	-53.894								5.9	-53.009
5.95	-53.8025								5.95	-52.8259
6	-53.5889								6	-52.5513
6.05	-53.894								6.05	-52.7954
6.1	-53.9856								6.1	-52.9175
6.15	-53.9856								6.15	-52.8564
6.2	-53.7415								6.2	-52.5513
6.25	-53.5583								6.25	-52.6733
6.3	-53.8025								6.3	-52.9175
6.35	-54.0466								6.35	-52.7954
6.4	-53.9856								6.4	-52.6733
6.45	-53.833								6.45	-52.6123
6.5	-53.6194								6.5	-52.8564
6.55	-53.8635								6.55	-52.887
6.6	-54.0161								6.6	-52.8564
6.65	-53.9246								6.65	-52.6123
6.7	-53.9856								6.7	-52.8259
6.75	-53.772								6.75	-52.9175
6.8	-53.7415								6.8	-52.8564
6.85	-53.894								6.85	-52.6733
6.9	-54.1077								6.9	-52.5513
6.95	-54.0161								6.95	-52.9175
7	-53.894								7	-52.8564
7.05	-53.5889								7.05	-52.7649
7.1	-53.7415								7.1	-52.4292
7.15	-53.9551								7.15	-52.6123
7.2	-54.1382								7.2	-52.887
7.25	-53.9551								7.25	-52.7954
7.3	-53.833								7.3	-52.7039
7.35	-53.8025								7.35	-52.3682
7.4	-53.6804								7.4	-52.5513
7.45	-53.894								7.45	-52.7954
7.5	-53.9856								7.5	-52.7344
7.55	-53.9551								7.55	-52.6428
7.6	-53.9551								7.6	-52.3071
7.65	-53.8635								7.65	-52.5513
7.7	-53.6804								7.7	-52.7649
7.75	-53.6499								7.75	-52.7039
7.8	-53.894								7.8	-52.5513
7.85	-53.9856								7.85	-52.3987
7.9	-54.0161								7.9	-52.4292
7.95	-53.894								7.95	-52.7039
8	-53.833								8	-52.7344
8.05	-53.6499								8.05	-52.7039
8.1	-53.6194								8.1	-52.5207
8.15	-53.8025								8.15	-52.3376
8.2	-54.0466								8.2	-52.4902
8.25	-54.0161								8.25	-52.7954
8.3	-53.9246								8.3	-52.6733
8.35	-53.9246								8.35	-52.6733
8.4	-53.8025								8.4	-52.3987
8.45	-53.6804								8.45	-52.3376
8.5	-53.6499								8.5	-52.5513
8.55	-53.7415								8.55	-52.7954
8.6	-54.0771								8.6	-52.7039
8.65	-54.1382								8.65	-52.7039
8.7	-53.894								8.7	-52.5207
8.75	-53.9551								8.75	-52.2461
8.8	-53.8025								8.8	-52.4597
8.85	-53.6194								8.85	-52.6733
8.9	-53.6804								8.9	-52.7649
8.95	-53.9551								8.95	-52.6123
9	-53.9551								9	-52.6123
9.05	-53.8025								9.05	-52.4292
9.1	-53.5278								9.1	-52.2461
9.15	-53.9246								9.15	-52.3987
9.2	-53.9856								9.2	-52.6428
9.25	-53.5278								9.25	-52.6428
9.3	-53.8635								9.3	-52.6123
9.35	-53.9551								9.35	-52.5513
9.4	-53.5583								9.4	-52.3682
9.45	-53.894								9.45	-52.3071
9.5	-53.894								9.5	-52.2156
9.55	-53.5278								9.55	-52.4902
9.6	-53.8635								9.6	-52.4902
9.65	-53.8025								9.65	-52.4902
9.7	-53.6499								9.7	-52.4902
9.75	-53.9551								9.75	-52.4597
9.8	-53.5889								9.8	-52.3071
9.85	-53.894								9.85	-52.0935
9.9	-53.8025								9.9	-52.2156
9.95	-53.5583								9.95	-52.5207
10	-53.9246								10	-52.5513
10.05	-53.6499								10.05	-52.4597
10.1	-53.894								10.1	-52.4292
10.15	-53.9246								10.15	-52.2461
10.2	-53.6194								10.2	-52.4292
10.25	-54.1077								10.25	-52.5513
10.3	-53.833								10.3	-52.4902
10.35	-53.8635								10.35	-52.1851
10.4	-53.9246								10.4	-52.6428
10.45	-53.7415								10.45	-52.5513
10.5	-53.9856								10.5	-52.2461
10.55	-53.9856								10.55	-52.6123
10.6	-53.6194								10.6	-52.5513
10.65	-54.0161								10.65	-52.124
10.7	-54.0161								10.7	-52.6123
10.75	-53.6194								10.75	-52.3987
10.8	-53.9551								10.8	-52.2766
10.85	-54.0161								10.85	-52.5207
10.9	-53.6804								10.9	-52.124
10.95	-53.894								10.95	-52.6428
11	-54.0161								11	-52.3682
11.05	-53.7415								11.05	-52.2461
11.1	-53.8635								11.1	-52.4597
11.15	-54.1077								11.15	-52.124
11.2	-53.8025								11.2	-52.4902
11.25	-53.6804								11.25	-52.3071
11.3	-53.9551								11.3	-52.2461
11.35	-53.9856								11.35	-52.4292
11.4	-53.5889								11.4	-52.1545
11.45	-54.0161								11.45	-52.4292
11.5	-53.9246								11.5	-52.3682
11.55	-53.7415								11.55	-52.063
11.6	-53.772								11.6	-52.4902
11.65	-53.9856								11.65	-52.3071
11.7	-53.894								11.7	-52.124
11.75	-53.6499								11.75	-52.5207
11.8	-54.0466								11.8	-52.2461
11.85	-54.0161								11.85	-52.2156
11.9	-53.8025								11.9	-52.3682
11.95	-53.8025								11.95	-52.2766
12	-54.1077								12	-52.1545
12.05	-53.8635								12.05	-52.4292
12.1	-53.6804								12.1	-52.2461
12.15	-54.0161								12.15	-52.124
12.2	-53.9856								12.2	-52.4292
12.25	-53.833								12.25	-52.2766
12.3	-53.772								12.3	-52.0325
12.35	-54.1382								12.35	-52.5207
12.4	-53.9856								12.4	-52.4597
12.45	-53.772								12.45	-51.9714
12.5	-53.833								12.5	-52.3376
12.55	-54.1382								12.55	-52.4292
12.6	-53.9856								12.6	-52.2461
12.65	-53.7415								12.65	-52.1851
12.7	-53.9246								12.7	-52.3376
12.75	-54.1992								12.75	-52.2766
12.8	-54.0771								12.8	-52.0325
12.85	-53.7415								12.85	-52.3376
12.9	-53.9551								12.9	-52.3682
12.95	-54.1687								12.95	-52.124
13	-54.0466								13	-52.2461
13.05	-53.7109								13.05	-52.3071
13.1	-53.9246								13.1	-52.124
13.15	-54.1687								13.15	-51.9714
13.2	-54.0466								13.2	-52.3987
13.25	-53.7109								13.25	-52.2766
13.3	-53.833								13.3	-51.8799
13.35	-54.1382								13.35	-52.063
13.4	-54.0466								13.4	-52.3376
13.45	-53.8635								13.45	-52.1851
13.5	-53.6804								13.5	-51.8188
13.55	-54.0161								13.55	-52.1545
13.6	-54.0771								13.6	-52.2461
13.65	-53.9246								13.65	-52.063
13.7	-53.6804								13.7	-51.9409
13.75	-53.9551								13.75	-52.2766
13.8	-54.1382								13.8	-52.1851
13.85	-54.0466								13.85	-51.9714
13.9	-53.772								13.9	-51.9409
13.95	-53.8025								13.95	-52.3376
14	-54.1077								14	-52.2461
14.05	-54.1382								14.05	-52.0019
14.1	-53.9856								14.1	-52.0325
14.15	-53.833								14.15	-52.3376
14.2	-53.833								14.2	-52.2766
14.25	-54.1687								14.25	-52.0325
14.3	-54.0161								14.3	-51.9714
14.35	-54.0466								14.35	-52.3682
14.4	-53.772								14.4	-52.3071
14.45	-53.8635								14.45	-52.0935
14.5	-54.1077								14.5	-52.0019
14.55	-54.0771								14.55	-52.3071
14.6	-54.0161								14.6	-52.2766
14.65	-53.772								14.65	-52.124
14.7	-53.833								14.7	-51.8799
14.75	-54.1077								14.75	-52.2461
14.8	-54.1382								14.8	-52.2461
14.85	-54.0161								14.85	-52.1545
14.9	-53.833								14.9	-51.8494
14.95	-53.833								14.95	-52.063
15	-54.0771								15	-52.2766
15.05	-54.1077								15.05	-52.1545
15.1	-54.1077								15.1	-52.0019
15.15	-53.9551								15.15	-51.8188
15.2	-53.772								15.2	-52.1851
15.25	-53.833								15.25	-52.063
15.3	-54.0161								15.3	-52.0935
15.35	-54.0466								15.35	-51.7578
15.4	-53.9856								15.4	-51.9104
15.45	-53.9246								15.45	-52.124
15.5	-53.7109								15.5	-52.1545
15.55	-53.772								15.55	-52.063
15.6	-54.0466								15.6	-51.7883
15.65	-54.0771								15.65	-52.0019
15.7	-54.0466								15.7	-52.2766
15.75	-53.8635								15.75	-52.1545
15.8	-53.8635								15.8	-52.0935
15.85	-53.7415								15.85	-51.8799
15.9	-54.0161								15.9	-52.063
15.95	-54.0771								15.95	-52.2766
16	-54.1382								16	-52.1545
16.05	-54.0771								16.05	-52.1851
16.1	-53.9551								16.1	-51.9104
16.15	-53.7109								16.15	-51.9714
16.2	-53.8635								16.2	-52.3376
16.25	-54.0161								16.25	-52.3987
16.3	-54.1382								16.3	-52.2766
16.35	-54.0771								16.35	-52.063
16.4	-54.1077								16.4	-51.8494
16.45	-54.0466								16.45	-52.124
16.5	-53.8635								16.5	-52.3071
16.55	-53.7109								16.55	-52.1851
16.6	-53.894								16.6	-52.1851
16.65	-54.1992								16.65	-51.9714
16.7	-54.0466								16.7	-51.9409
16.75	-54.0466								16.75	-52.124
16.8	-54.0161								16.8	-52.3071
16.85	-53.9551								16.85	-52.1851
16.9	-53.833								16.9	-52.2156
16.95	-53.6804								16.95	-52.0019
17	-53.833								17	-51.8799
17.05	-54.0161								17.05	-52.063
17.1	-54.1077								17.1	-52.1851
17.15	-53.9856								17.15	-52.1851
17.2	-53.9551								17.2	-52.1545
17.25	-53.7415								17.25	-52.0325
17.3	-53.7415								17.3	-51.8494
17.35	-53.9856								17.35	-51.8188
17.4	-53.894								17.4	-52.063
17.45	-53.7109								17.45	-52.1851
17.5	-53.7109								17.5	-52.124
17.55	-53.9856								17.55	-52.1851
17.6	-53.894								17.6	-52.0325
17.65	-53.6194								17.65	-51.8188
17.7	-53.9856								17.7	-51.8494
17.75	-53.772								17.75	-52.063
17.8	-53.5583								17.8	-52.124
17.85	-53.9551								17.85	-52.124
17.9	-53.833								17.9	-52.1545
17.95	-53.772								17.95	-52.0935
18	-53.894								18	-51.9409
18.05	-53.6499								18.05	-51.8494
18.1	-53.894								18.1	-51.8494
18.15	-53.8025								18.15	-52.063
18.2	-53.772								18.2	-52.0935
18.25	-54.0161								18.25	-52.2156
18.3	-53.5583								18.3	-52.124
18.35	-54.0161								18.35	-52.0325
18.4	-53.8025								18.4	-51.7578
18.45	-53.772								18.45	-52.0325
18.5	-53.9551								18.5	-52.3376
18.55	-53.5278								18.55	-52.1851
18.6	-53.9551								18.6	-51.9409
18.65	-53.9551								18.65	-51.8799
18.7	-53.6194								18.7	-52.1851
18.75	-53.9551								18.75	-52.063
18.8	-53.7415								18.8	-51.7578
18.85	-53.7109								18.85	-52.1545
18.9	-54.0161								18.9	-52.0325
18.95	-53.6194								18.95	-51.7273
19	-53.6804								19	-52.1545
19.05	-53.772								19.05	-51.8799
19.1	-53.6804								19.1	-51.9104
19.15	-53.6499								19.15	-52.0325
19.2	-53.894								19.2	-51.7273
19.25	-53.6499								19.25	-52.063
19.3	-53.5889								19.3	-52.0019
19.35	-53.8635								19.35	-51.8188
19.4	-53.6194								19.4	-52.124
19.45	-53.4668								19.45	-51.7273
19.5	-53.8635								19.5	-52.0935
19.55	-53.7109								19.55	-52.063
19.6	-53.3447								19.6	-51.7883
19.65	-53.772								19.65	-52.1545
19.7	-53.6804								19.7	-51.7883
19.75	-53.4668								19.75	-52.063
19.8	-53.6804								19.8	-52.063
19.85	-53.7109								19.85	-51.7273
19.9	-53.6194								19.9	-52.0935
19.95	-53.4973								19.95	-52.124
20	-53.8635								20	-51.7578
20.05	-53.5889								20.05	-52.1851
20.1	-53.4363								20.1	-52.0325
20.15	-53.6804								20.15	-51.7883
20.2	-53.7109								20.2	-52.1851
20.25	-53.5583								20.25	-51.9714
20.3	-53.5583								20.3	-51.8188
20.35	-53.894								20.35	-52.1545
20.4	-53.6499								20.4	-52.0935
20.45	-53.3142								20.45	-51.7273
20.5	-53.8025								20.5	-52.2156
20.55	-53.833								20.55	-52.1851
20.6	-53.6194								20.6	-51.8494
20.65	-53.4058								20.65	-52.0935
20.7	-53.833								20.7	-52.1545
20.75	-53.772								20.75	-52.0019
20.8	-53.4668								20.8	-52.063
20.85	-53.4973								20.85	-52.1851
20.9	-53.8025								20.9	-52.063
20.95	-53.6804								20.95	-51.9104
21	-53.3142								21	-52.2766
21.05	-53.4973								21.05	-52.1851
21.1	-53.7109								21.1	-51.8494
21.15	-53.5889								21.15	-52.063
21.2	-53.2837								21.2	-52.1851
21.25	-53.4668								21.25	-52.063
21.3	-53.7109								21.3	-51.7883
21.35	-53.4973								21.35	-52.2156
21.4	-53.2227								21.4	-52.124
21.45	-53.4363								21.45	-51.8188
21.5	-53.5889								21.5	-51.9714
21.55	-53.4973								21.55	-52.1545
21.6	-53.2532								21.6	-52.063
21.65	-53.3447								21.65	-51.7578
21.7	-53.5278								21.7	-52.1851
21.75	-53.5583								21.75	-52.0935
21.8	-53.3447								21.8	-52.0935
21.85	-53.2532								21.85	-51.9104
21.9	-53.5583								21.9	-52.2461
21.95	-53.4973								21.95	-52.124
22	-53.3447								22	-51.9714
22.05	-53.1616								22.05	-52.0325
22.1	-53.4973								22.1	-52.3071
22.15	-53.5889								22.15	-52.1545
22.2	-53.5889								22.2	-51.9714
22.25	-53.1921								22.25	-52.124
22.3	-53.3447								22.3	-52.1851
22.35	-53.6499								22.35	-52.1545
22.4	-53.5583								22.4	-51.8799
22.45	-53.3447								22.45	-52.063
22.5	-53.1311								22.5	-52.1545
22.55	-53.5583								22.55	-52.063
22.6	-53.7109								22.6	-51.9104
22.65	-53.4363								22.65	-52.0325
22.7	-53.4058								22.7	-52.124
22.75	-53.1921								22.75	-52.124
22.8	-53.4973								22.8	-51.9104
22.85	-53.5889								22.85	-51.9104
22.9	-53.5278								22.9	-52.0935
22.95	-53.4058								22.95	-52.063
23	-53.2837								23	-51.8494
23.05	-53.4668								23.05	-51.6663
23.1	-53.6194								23.1	-52.0935
23.15	-53.4973								23.15	-52.0935
23.2	-53.3447								23.2	-51.9104
23.25	-53.1616								23.25	-51.6968
23.3	-53.3142								23.3	-51.8799
23.35	-53.4973								23.35	-52.0325
23.4	-53.4973								23.4	-51.9409
23.45	-53.4363								23.45	-51.7578
23.5	-53.2227								23.5	-51.6052
23.55	-53.1616								23.55	-51.8799
23.6	-53.3752								23.6	-52.0019
23.65	-53.5278								23.65	-51.9409
23.7	-53.4668								23.7	-51.7273
23.75	-53.2532								23.75	-51.6052
23.8	-53.1311								23.8	-51.9714
23.85	-53.1921								23.85	-51.9714
23.9	-53.4668								23.9	-51.8799
23.95	-53.4668								23.95	-51.6968
24	-53.4668								24	-51.6357
24.05	-53.2837								24.05	-51.9714
24.1	-53.0395								24.1	-52.0325
24.15	-53.1311								24.15	-51.9104
24.2	-53.4058								24.2	-51.7273
24.25	-53.4973								24.25	-51.5747
24.3	-53.3447								24.3	-51.8494
24.35	-53.4058								24.35	-51.9714
24.4	-53.2837								24.4	-51.8799
24.45	-53.1616								24.45	-51.8188
24.5	-53.2227								24.5	-51.5747
24.55	-53.4668								24.55	-51.6663
24.6	-53.6194								24.6	-51.9409
24.65	-53.4973								24.65	-51.9104
24.7	-53.3447								24.7	-51.9409
24.75	-53.2837								24.75	-51.6357
24.8	-53.1006								24.8	-51.4526
24.85	-53.2227								24.85	-51.6968
24.9	-53.3752								24.9	-51.8494
24.95	-53.4973								24.95	-51.8188
25	-53.4668								25	-51.7883
25.05	-53.4668								25.05	-51.5442
25.1	-53.2837								25.1	-51.4526
25.15	-53.2227								25.15	-51.6968
25.2	-53.0395								25.2	-51.8494
25.25	-53.1616								25.25	-51.7578
25.3	-53.4058								25.3	-51.7883
25.35	-53.4973								25.35	-51.6357
25.4	-53.4058								25.4	-51.5137
25.45	-53.4058								25.45	-51.5137
25.5	-53.2227								25.5	-51.7578
25.55	-53.009								25.55	-51.8799
25.6	-53.2227								25.6	-51.8188
25.65	-53.4668								25.65	-51.7883
25.7	-53.4363								25.7	-51.7273
25.75	-53.0701								25.75	-51.5747
25.8	-53.0701								25.8	-51.5137
25.85	-53.4363								25.85	-51.7883
25.9	-53.2837								25.9	-52.0019
25.95	-53.009								25.95	-51.8799
26	-53.3752								26	-51.7883
26.05	-53.4058								26.05	-51.7883
26.1	-52.948								26.1	-51.7578
26.15	-53.3752								26.15	-51.6663
26.2	-53.1616								26.2	-51.5747
26.25	-53.1921								26.25	-51.8799
26.3	-53.3752								26.3	-52.0325
26.35	-53.0395								26.35	-51.9714
26.4	-53.3447								26.4	-51.8494
26.45	-53.4363								26.45	-51.8188
26.5	-53.1616								26.5	-51.7273
26.55	-53.3752								26.55	-51.6357
26.6	-53.0701								26.6	-51.6052
26.65	-53.4668								26.65	-51.9104
26.7	-53.4058								26.7	-51.9409
26.75	-53.0701								26.75	-51.8494
26.8	-53.4973								26.8	-51.7273
26.85	-53.1616								26.85	-51.5747
26.9	-53.4668								26.9	-51.9409
26.95	-53.3447								26.95	-51.8799
27	-52.948								27	-51.6968
27.05	-53.4668								27.05	-51.6052
27.1	-53.3447								27.1	-51.9104
27.15	-53.0701								27.15	-51.6968
27.2	-53.4973								27.2	-51.6052
27.25	-53.1921								27.25	-51.8494
27.3	-53.1311								27.3	-51.7578
27.35	-53.4973								27.35	-51.6968
27.4	-53.2227								27.4	-51.8799
27.45	-53.1311								27.45	-51.4526
27.5	-53.5278								27.5	-51.9409
27.55	-53.3447								27.55	-51.7883
27.6	-53.1311								27.6	-51.6357
27.65	-53.4058								27.65	-51.8494
27.7	-53.4058								27.7	-51.4526
27.75	-53.0395								27.75	-52.0019
27.8	-53.4668								27.8	-51.7883
27.85	-53.4363								27.85	-51.5747
27.9	-53.1311								27.9	-51.8799
27.95	-53.4058								27.95	-51.6663
28	-53.4668								28	-51.9409
28.05	-53.2532								28.05	-51.7883
28.1	-53.2837								28.1	-51.6052
28.15	-53.4973								28.15	-51.9714
28.2	-53.4058								28.2	-51.8188
28.25	-53.1616								28.25	-51.6663
28.3	-53.5278								28.3	-51.9409
28.35	-53.4668								28.35	-51.6663
28.4	-53.1006								28.4	-51.8188
28.45	-53.2837								28.45	-51.9104
28.5	-53.5278								28.5	-51.6663
28.55	-53.4058								28.55	-51.8799
28.6	-53.009								28.6	-51.9409
28.65	-53.4668								28.65	-51.6968
28.7	-53.5583								28.7	-51.7883
28.75	-53.2837								28.75	-51.9714
28.8	-53.2227								28.8	-51.7273
28.85	-53.5278								28.85	-51.7578
28.9	-53.4363								28.9	-51.9409
28.95	-53.1006								28.95	-51.7578
29	-53.3447								29	-51.5747
29.05	-53.4058								29.05	-51.9714
29.1	-53.2837								29.1	-51.8799
29.15	-53.1311								29.15	-51.4832
29.2	-53.4973								29.2	-51.8188
29.25	-53.4058								29.25	-51.8494
29.3	-53.2532								29.3	-51.6052
29.35	-53.1006								29.35	-51.7273
29.4	-53.5278								29.4	-52.0019
29.45	-53.4973								29.45	-51.7578
29.5	-53.2227								29.5	-51.5137
29.55	-53.1311								29.55	-51.8494
29.6	-53.4973								29.6	-51.9409
29.65	-53.4363								29.65	-51.5747
29.7	-53.2532								29.7	-51.8494
29.75	-53.1921								29.75	-51.9409
29.8	-53.5889								29.8	-51.8494
29.85	-53.4973								29.85	-51.6357
29.9	-53.2837								29.9	-51.9409
29.95	-53.1921								29.95	-51.8494
30	-53.5889								30	-51.7273
30.05	-53.4973								30.05	-51.7883
30.1	-53.2837								30.1	-51.9409
30.15	-53.1616								30.15	-51.9104
30.2	-53.4668								30.2	-51.6357
30.25	-53.4973								30.25	-51.9714
30.3	-53.4363								30.3	-51.9714
30.35	-53.1921								30.35	-51.8799
30.4	-53.3752								30.4	-51.6357
30.45	-53.5889								30.45	-52.0325
30.5	-53.4973								30.5	-51.9714
30.55	-53.3752								30.55	-51.7883
30.6	-53.1616								30.6	-51.6052
30.65	-53.4058								30.65	-51.9409
30.7	-53.5583								30.7	-51.9409
30.75	-53.4973								30.75	-51.7578
30.8	-53.3447								30.8	-51.6357
30.85	-53.1616								30.85	-52.0019
30.9	-53.4668								30.9	-52.0019
30.95	-53.4973								30.95	-51.8494
31	-53.4058								31	-51.6052
31.05	-53.1311								31.05	-51.9714
31.1	-53.2532								31.1	-52.0325
31.15	-53.5583								31.15	-51.8799
31.2	-53.4973								31.2	-51.5137
31.25	-53.4363								31.25	-52.0019
31.3	-53.1616								31.3	-52.0325
31.35	-53.1616								31.35	-51.9714
31.4	-53.4058								31.4	-51.6357
31.45	-53.5583								31.45	-51.9409
31.5	-53.4058								31.5	-52.1545
31.55	-53.2227								31.55	-52.063
31.6	-53.1311								31.6	-51.8799
31.65	-53.4668								31.65	-51.8188
31.7	-53.5278								31.7	-52.124
31.75	-53.4973								31.75	-52.063
31.8	-53.3447								31.8	-52.0935
31.85	-53.2532								31.85	-51.9104
31.9	-53.2532								31.9	-52.0019
31.95	-53.4363								31.95	-52.1545
32	-53.5583								32	-52.1851
32.05	-53.4668								32.05	-52.0935
32.1	-53.2837								32.1	-51.8799
32.15	-53.0395								32.15	-52.0325
32.2	-53.2837								32.2	-52.2156
32.25	-53.5278								32.25	-52.2461
32.3	-53.4668								32.3	-52.063
32.35	-53.4363								32.35	-51.8494
32.4	-53.4058								32.4	-52.0325
32.45	-53.1921								32.45	-52.3071
32.5	-53.2227								32.5	-52.2461
32.55	-53.4363								32.55	-52.1545
32.6	-53.6194								32.6	-51.9104
32.65	-53.5889								32.65	-52.0935
32.7	-53.4668								32.7	-52.2766
32.75	-53.3142								32.75	-52.2766
32.8	-53.1311								32.8	-52.1851
32.85	-53.2532								32.85	-52.0019
32.9	-53.4058								32.9	-52.0019
32.95	-53.4973								32.95	-52.2156
33	-53.5278								33	-52.2766
33.05	-53.4973								33.05	-52.2461
33.1	-53.3142								33.1	-52.1851
33.15	-53.1616								33.15	-52.0019
33.2	-53.1311								33.2	-52.0019
33.25	-53.4363								33.25	-52.3071
33.3	-53.4363								33.3	-52.2766
33.35	-53.4668								33.35	-52.2766
33.4	-53.4058								33.4	-52.1851
33.45	-53.4058								33.45	-51.9714
33.5	-53.3447								33.5	-52.124
33.55	-53.0701								33.55	-52.3071
33.6	-53.1006								33.6	-52.3682
33.65	-53.3142								33.65	-52.2766
33.7	-53.5278								33.7	-52.3987
33.75	-53.4668								33.75	-52.124
33.8	-53.4668								33.8	-51.9714
33.85	-53.4058								33.85	-52.2156
33.9	-53.1006								33.9	-52.4292
33.95	-53.2532								33.95	-52.5207
34	-53.4668								34	-52.4292
34.05	-53.5583								34.05	-52.3071
34.1	-53.2837								34.1	-52.2461
34.15	-53.2837								34.15	-52.1545
34.2	-53.5278								34.2	-52.2461
34.25	-53.4363								34.25	-52.4597
34.3	-53.2837								34.3	-52.4597
34.35	-53.5889								34.35	-52.4597
34.4	-53.4058								34.4	-52.3987
34.45	-53.2227								34.45	-52.2766
34.5	-53.6194								34.5	-52.124
34.55	-53.2532								34.55	-52.1851
34.6	-53.4363								34.6	-52.3987
34.65	-53.5278								34.65	-52.4597
34.7	-53.1616								34.7	-52.5513
34.75	-53.4973								34.75	-52.4292
34.8	-53.3142								34.8	-52.4292
34.85	-53.3447								34.85	-52.3682
34.9	-53.5583								34.9	-52.2156
34.95	-53.0701								34.95	-52.1851
35	-53.5278								35	-52.3376
35.05	-53.3752								35.05	-52.5207
35.1	-53.4058								35.1	-52.4292
35.15	-53.5583								35.15	-52.3376
35.2	-53.009								35.2	-52.1545
35.25	-53.5278								35.25	-52.4902
35.3	-53.4668								35.3	-52.4292
35.35	-53.1921								35.35	-52.3682
35.4	-53.4668								35.4	-52.2461
35.45	-53.2227								35.45	-52.5818
35.5	-53.2837								35.5	-52.3682
35.55	-53.4973								35.55	-52.3071
35.6	-53.2532								35.6	-52.6123
35.65	-53.2837								35.65	-52.3071
35.7	-53.4973								35.7	-52.3987
35.75	-53.2532								35.75	-52.6123
35.8	-53.3752								35.8	-52.1545
35.85	-53.4058								35.85	-52.6123
35.9	-53.3752								35.9	-52.5513
35.95	-53.2532								35.95	-52.3987
36	-53.4973								36	-52.7344
36.05	-53.3142								36.05	-52.2766
36.1	-53.2532								36.1	-52.7649
36.15	-53.5583								36.15	-52.5818
36.2	-53.4363								36.2	-52.4902
36.25	-53.0701								36.25	-52.6428
36.3	-53.6194								36.3	-52.3071
36.35	-53.5278								36.35	-52.7649
36.4	-53.1311								36.4	-52.6123
36.45	-53.4668								36.45	-52.3071
36.5	-53.4973								36.5	-52.7344
36.55	-53.3447								36.55	-52.4902
36.6	-53.1006								36.6	-52.5818
36.65	-53.4973								36.65	-52.7039
36.7	-53.4058								36.7	-52.3071
36.75	-53.009								36.75	-52.6123
36.8	-53.3752								36.8	-52.6428
36.85	-53.4058								36.85	-52.3682
36.9	-53.2837								36.9	-52.6123
36.95	-53.1921								36.95	-52.6733
37	-53.4363								37	-52.3376
37.05	-53.3447								37.05	-52.6123
37.1	-52.9785								37.1	-52.6123
37.15	-53.3447								37.15	-52.3376
37.2	-53.4363								37.2	-52.6123
37.25	-53.1311								37.25	-52.7344
37.3	-52.948								37.3	-52.5513
37.35	-53.3447								37.35	-52.4902
37.4	-53.3447								37.4	-52.887
37.45	-53.0701								37.45	-52.6123
37.5	-53.0395								37.5	-52.4292
37.55	-53.4058								37.55	-52.8259
37.6	-53.2532								37.6	-52.7954
37.65	-52.948								37.65	-52.4902
37.7	-53.0701								37.7	-52.7649
37.75	-53.3752								37.75	-52.7954
37.8	-53.3142								37.8	-52.6733
37.85	-52.948								37.85	-52.6733
37.9	-53.1616								37.9	-52.8564
37.95	-53.4668								37.95	-52.7954
38	-53.2532								38	-52.5513
38.05	-53.0395								38.05	-52.9175
38.1	-53.1311								38.1	-52.8259
38.15	-53.4668								38.15	-52.6428
38.2	-53.2532								38.2	-52.7344
38.25	-52.948								38.25	-52.9175
38.3	-53.1006								38.3	-52.7649
38.35	-53.4363								38.35	-52.4292
38.4	-53.3752								38.4	-52.9175
38.45	-53.1006								38.45	-52.8564
38.5	-53.0395								38.5	-52.6733
38.55	-53.4363								38.55	-52.4597
38.6	-53.3447								38.6	-52.887
38.65	-53.1311								38.65	-52.8564
38.7	-52.948								38.7	-52.6123
38.75	-53.2532								38.75	-52.6428
38.8	-53.3142								38.8	-52.9175
38.85	-53.3142								38.85	-52.8564
38.9	-53.0701								38.9	-52.5207
38.95	-53.0395								38.95	-52.7344
39	-53.3752								39	-52.887
39.05	-53.2837								39.05	-52.7954
39.1	-53.1006								39.1	-52.4902
39.15	-52.887								39.15	-52.7954
39.2	-53.1311								39.2	-52.8259
39.25	-53.3447								39.25	-52.887
39.3	-53.3142								39.3	-52.4902
39.35	-53.1311								39.35	-52.7954
39.4	-52.887								39.4	-52.9175
39.45	-53.1921								39.45	-52.9785
39.5	-53.3752								39.5	-52.6733
39.55	-53.2532								39.55	-52.7954
39.6	-53.1311								39.6	-53.0701
39.65	-52.948								39.65	-52.948
39.7	-53.1616								39.7	-52.8564
39.75	-53.3447								39.75	-52.6428
39.8	-53.3142								39.8	-53.0395
39.85	-53.1616								39.85	-52.9785
39.9	-53.0701								39.9	-52.9175
39.95	-53.0701								39.95	-52.5207
40	-53.4363								40	-52.9785
40.05	-53.3752								40.05	-53.1006
40.1	-53.2532								40.1	-53.0395
40.15	-53.1006								40.15	-52.6733
40.2	-52.9785								40.2	-52.7649
40.25	-53.2227								40.25	-53.1311
40.3	-53.4058								40.3	-53.0395
40.35	-53.2837								40.35	-52.8259
40.4	-53.3752								40.4	-52.5207
40.45	-53.1921								40.45	-52.8564
40.5	-52.9785								40.5	-53.0395
40.55	-53.3142								40.55	-52.948
40.6	-53.4973								40.6	-52.7649
40.65	-53.3447								40.65	-52.5513
40.7	-53.3142								40.7	-52.9175
40.75	-53.1616								40.75	-53.0701
40.8	-53.0395								40.8	-52.887
40.85	-53.2532								40.85	-52.7649
40.9	-53.4363								40.9	-52.6733
40.95	-53.3752								40.95	-52.8564
41	-53.3752								41	-53.0395
41.05	-53.2532								41.05	-52.948
41.1	-53.0395								41.1	-52.7954
41.15	-53.009								41.15	-52.6428
41.2	-53.2837								41.2	-52.8259
41.25	-53.3752								41.25	-53.0701
41.3	-53.4058								41.3	-53.0395
41.35	-53.2837								41.35	-53.009
41.4	-53.2227								41.4	-52.7954
41.45	-53.1006								41.45	-52.6733
41.5	-52.9785								41.5	-53.009
41.55	-53.1006								41.55	-53.1006
41.6	-53.2837								41.6	-53.1006
41.65	-53.4058								41.65	-52.9785
41.7	-53.3447								41.7	-52.7954
41.75	-53.2837								41.75	-52.8259
41.8	-53.1921								41.8	-53.009
41.85	-53.1311								41.85	-53.1921
41.9	-52.9785								41.9	-53.1006
41.95	-53.1311								41.95	-53.1006
42	-53.3447								42	-52.7954
42.05	-53.4363								42.05	-52.8259
42.1	-53.3752								42.1	-53.009
42.15	-53.2837								42.15	-53.2532
42.2	-53.1921								42.2	-53.1311
42.25	-53.1006								42.25	-53.1311
42.3	-53.3752								42.3	-53.0395
42.35	-53.4058								42.35	-52.887
42.4	-53.3142								42.4	-52.8564
42.45	-53.1006								42.45	-52.9785
42.5	-53.4363								42.5	-53.1311
42.55	-53.4058								42.55	-53.1006
42.6	-53.2227								42.6	-53.1616
42.65	-53.3752								42.65	-52.9785
42.7	-53.5889								42.7	-52.7649
42.75	-53.1311								42.75	-52.7954
42.8	-53.3447								42.8	-53.009
42.85	-53.4973								42.85	-53.1006
42.9	-53.1616								42.9	-53.1311
42.95	-53.4668								42.95	-53.1006
43	-53.4058								43	-53.0701
43.05	-53.2227								43.05	-52.948
43.1	-53.4668								43.1	-52.8564
43.15	-53.1311								43.15	-52.8259
43.2	-53.4973								43.2	-53.009
43.25	-53.4668								43.25	-53.1921
43.3	-53.1311								43.3	-53.1311
43.35	-53.5583								43.35	-53.1616
43.4	-53.1921								43.4	-53.0395
43.45	-53.4058								43.45	-52.7954
43.5	-53.4668								43.5	-53.1311
43.55	-53.1006								43.55	-53.2837
43.6	-53.4973								43.6	-53.2532
43.65	-53.3142								43.65	-52.8259
43.7	-53.2227								43.7	-53.2227
43.75	-53.4973								43.75	-53.2532
43.8	-53.2532								43.8	-53.009
43.85	-53.3142								43.85	-53.0701
43.9	-53.5278								43.9	-53.2837
43.95	-53.1616								43.95	-52.9785
44	-53.4363								44	-53.3447
44.05	-53.4363								44.05	-53.1921
44.1	-53.3142								44.1	-52.9175
44.15	-53.3142								44.15	-53.3142
44.2	-53.4668								44.2	-53.1006
44.25	-53.3752								44.25	-53.2227
44.3	-53.3447								44.3	-53.3142
44.35	-53.5583								44.35	-52.9175
44.4	-53.3752								44.4	-53.3447
44.45	-53.1616								44.45	-53.0395
44.5	-53.6499								44.5	-53.2837
44.55	-53.6194								44.55	-53.2837
44.6	-53.1311								44.6	-52.9785
44.65	-53.5583								44.65	-53.3447
44.7	-53.6194								44.7	-53.0395
44.75	-53.4363								44.75	-53.1921
44.8	-53.3447								44.8	-53.2532
44.85	-53.6194								44.85	-52.948
44.9	-53.5278								44.9	-53.3447
44.95	-53.3142								44.95	-53.2227
45	-53.6194								45	-53.009
45.05	-53.5889								45.05	-53.2837
45.1	-53.2837								45.1	-53.1311
45.15	-53.4973								45.15	-53.009
45.2	-53.6804								45.2	-53.3752
45.25	-53.4668								45.25	-53.1006
45.3	-53.2532								45.3	-53.1616
45.35	-53.5889								45.35	-53.3142
45.4	-53.5278								45.4	-53.1921
45.45	-53.3752								45.45	-53.1006
45.5	-53.3142								45.5	-53.3142
45.55	-53.6194								45.55	-53.1921
45.6	-53.5889								45.6	-53.0395
45.65	-53.2532								45.65	-53.3752
45.7	-53.4058								45.7	-53.2227
45.75	-53.6499								45.75	-52.9175
45.8	-53.4973								45.8	-53.4058
45.85	-53.2532								45.85	-53.4058
45.9	-53.5278								45.9	-52.9175
45.95	-53.6499								45.95	-53.2532
46	-53.4973								46	-53.3752
46.05	-53.2532								46.05	-53.1616
46.1	-53.5583								46.1	-53.1006
46.15	-53.6804								46.15	-53.4058
46.2	-53.4973								46.2	-53.2227
46.25	-53.2532								46.25	-52.9175
46.3	-53.6194								46.3	-53.3752
46.35	-53.7109								46.35	-53.2532
46.4	-53.5583								46.4	-53.0395
46.45	-53.2837								46.45	-53.1921
46.5	-53.5889								46.5	-53.3752
46.55	-53.8025								46.55	-53.1921
46.6	-53.6499								46.6	-52.948
46.65	-53.3752								46.65	-53.4363
46.7	-53.5278								46.7	-53.4058
46.75	-53.833								46.75	-52.9785
46.8	-53.7109								46.8	-53.0701
46.85	-53.4058								46.85	-53.3752
46.9	-53.4058								46.9	-53.3447
46.95	-53.7415								46.95	-52.9785
47	-53.7109								47	-53.2227
47.05	-53.5278								47.05	-53.4058
47.1	-53.2532								47.1	-53.1616
47.15	-53.5583								47.15	-53.1311
47.2	-53.7109								47.2	-53.3447
47.25	-53.6499								47.25	-53.4058
47.3	-53.3447								47.3	-53.1311
47.35	-53.2837								47.35	-53.0395
47.4	-53.5278								47.4	-53.4058
47.45	-53.5889								47.45	-53.4363
47.5	-53.4058								47.5	-53.1921
47.55	-53.1921								47.55	-53.1616
47.6	-53.2837								47.6	-53.4973
47.65	-53.5278								47.65	-53.4668
47.7	-53.4973								47.7	-53.1921
47.75	-53.4058								47.75	-53.1311
47.8	-53.1921								47.8	-53.4058
47.85	-53.2532								47.85	-53.4363
47.9	-53.5583								47.9	-53.2532
47.95	-53.4363								47.95	-53.1311
48	-53.4973								48	-53.4058
48.05	-53.3752								48.05	-53.4973
48.1	-53.2532								48.1	-53.3142
48.15	-53.4668								48.15	-53.0395
48.2	-53.6804								48.2	-53.4363
48.25	-53.5889								48.25	-53.4058
48.3	-53.4363								48.3	-53.3447
48.35	-53.1616								48.35	-53.0395
48.4	-53.3447								48.4	-53.3447
48.45	-53.6804								48.45	-53.4973
48.5	-53.5278								48.5	-53.4058
48.55	-53.5889								48.55	-53.2532
48.6	-53.4058								48.6	-53.1311
48.65	-53.2532								48.65	-53.4363
48.7	-53.4668								48.7	-53.5278
48.75	-53.6194								48.75	-53.4058
48.8	-53.6804								48.8	-53.2532
48.85	-53.6804								48.85	-53.2532
48.9	-53.4668								48.9	-53.5889
48.95	-53.3142								48.95	-53.4973
49	-53.4363								49	-53.3752
49.05	-53.7109								49.05	-53.0701
49.1	-53.6499								49.1	-53.4363
49.15	-53.6194								49.15	-53.5889
49.2	-53.5889								49.2	-53.5278
49.25	-53.4058								49.25	-53.4058
49.3	-53.4058								49.3	-53.1921
49.35	-53.5583								49.35	-53.3752
49.4	-53.7415								49.4	-53.5889
49.45	-53.6804								49.45	-53.5583
49.5	-53.6194								49.5	-53.5583
49.55	-53.5278								49.55	-53.2837
49.6	-53.4363								49.6	-53.3142
49.65	-53.3447								49.65	-53.6499
49.7	-53.5583								49.7	-53.6804
49.75	-53.7109								49.75	-53.6194
49.8	-53.6499								49.8	-53.4058
49.85	-53.6499								49.85	-53.2532
49.9	-53.6804								49.9	-53.6499
49.95	-53.5278								49.95	-53.772
50	-53.3447								50	-53.6499
50.05	-53.4058								50.05	-53.6804
50.1	-53.5583								50.1	-53.4668
50.15	-53.7109								50.15	-53.3752
50.2	-53.7415								50.2	-53.6194
50.25	-53.772								50.25	-53.7415
50.3	-53.7109								50.3	-53.5889
50.35	-53.5889								50.35	-53.5583
50.4	-53.5278								50.4	-53.4363
50.45	-53.4973								50.45	-53.2837
50.5	-53.6499								50.5	-53.4668
50.55	-53.7415								50.55	-53.6804
50.6	-53.7109								50.6	-53.7109
50.65	-53.6804								50.65	-53.6194
50.7	-53.4668								50.7	-53.4363
50.75	-53.6499								50.75	-53.3142
50.8	-53.7415								50.8	-53.3142
50.85	-53.5889								50.85	-53.5583
50.9	-53.5889								50.9	-53.5583
50.95	-53.833								50.95	-53.6499
51	-53.6804								51	-53.6499
51.05	-53.5583								51.05	-53.4363
51.1	-53.833								51.1	-53.2227
51.15	-53.5583								51.15	-53.3752
51.2	-53.6804								51.2	-53.5583
51.25	-53.7415								51.25	-53.6194
51.3	-53.4058								51.3	-53.6804
51.35	-53.894								51.35	-53.6804
51.4	-53.772								51.4	-53.6194
51.45	-53.5583								51.45	-53.4058
51.5	-53.8635								51.5	-53.3142
51.55	-53.5583								51.55	-53.4668
51.6	-53.833								51.6	-53.6804
51.65	-53.7109								51.65	-53.8025
51.7	-53.5278								51.7	-53.7415
51.75	-53.8025								51.75	-53.5889
51.8	-53.4973								51.8	-53.4058
51.85	-53.772								51.85	-53.4973
51.9	-53.833								51.9	-53.8025
51.95	-53.4973								51.95	-53.7109
52	-53.894								52	-53.4363
52.05	-53.7109								52.05	-53.5889
52.1	-53.6194								52.1	-53.5889
52.15	-53.9246								52.15	-53.4668
52.2	-53.772								52.2	-53.5889
52.25	-53.6804								52.25	-53.6804
52.3	-53.9551								52.3	-53.3447
52.35	-53.772								52.35	-53.5278
52.4	-53.6804								52.4	-53.6499
52.45	-53.9551								52.45	-53.2837
52.5	-53.8635								52.5	-53.7415
52.55	-53.6804								52.55	-53.4973
52.6	-54.0161								52.6	-53.5278
52.65	-53.8635								52.65	-53.7109
52.7	-53.6499								52.7	-53.2532
52.75	-54.0466								52.75	-53.6804
52.8	-53.894								52.8	-53.4363
52.85	-53.4668								52.85	-53.5889
52.9	-53.8635								52.9	-53.6194
52.95	-53.8635								52.95	-53.1921
53	-53.6499								53	-53.6804
53.05	-53.6804								53.05	-53.4058
53.1	-53.8635								53.1	-53.4668
53.15	-53.772								53.15	-53.6194
53.2	-53.5583								53.2	-53.3142
53.25	-53.9246								53.25	-53.7109
53.3	-53.894								53.3	-53.6194
53.35	-53.4973								53.35	-53.3142
53.4	-53.772								53.4	-53.8025
53.45	-53.894								53.45	-53.5889
53.5	-53.7415								53.5	-53.4058
53.55	-53.4973								53.55	-53.7415
53.6	-53.9246								53.6	-53.5278
53.65	-53.8025								53.65	-53.4973
53.7	-53.6499								53.7	-53.7415
53.75	-53.7109								53.75	-53.5278
53.8	-54.0771								53.8	-53.4668
53.85	-53.894								53.85	-53.772
53.9	-53.5278								53.9	-53.6499
53.95	-53.894								53.95	-53.3752
54	-53.9246								54	-53.8025
54.05	-53.8025								54.05	-53.7415
54.1	-53.5278								54.1	-53.4058
54.15	-54.0161								54.15	-53.7109
54.2	-53.9551								54.2	-53.7109
54.25	-53.8025								54.25	-53.4058
54.3	-53.6194								54.3	-53.7109
54.35	-53.9856								54.35	-53.6499
54.4	-54.0161								54.4	-53.5583
54.45	-53.772								54.45	-53.4363
54.5	-53.7109								54.5	-53.833
54.55	-54.0161								54.55	-53.6499
54.6	-54.0466								54.6	-53.2837
54.65	-53.8025								54.65	-53.7109
54.7	-53.6499								54.7	-53.8025
54.75	-54.0161								54.75	-53.4668
54.8	-54.1382								54.8	-53.5278
54.85	-53.833								54.85	-53.833
54.9	-53.6194								54.9	-53.5889
54.95	-53.9856								54.95	-53.3447
55	-54.0771								55	-53.7415
55.05	-53.894								55.05	-53.8025
55.1	-53.5278								55.1	-53.5583
55.15	-53.833								55.15	-53.4668
55.2	-54.0161								55.2	-53.8025
55.25	-53.9551								55.25	-53.8025
55.3	-53.7415								55.3	-53.4058
55.35	-53.6804								55.35	-53.6499
55.4	-54.0466								55.4	-53.7415
55.45	-54.0161								55.45	-53.6499
55.5	-53.833								55.5	-53.4973
55.55	-53.5583								55.55	-53.7109
55.6	-53.772								55.6	-53.8025
55.65	-54.0466								55.65	-53.6194
55.7	-53.9246								55.7	-53.5889
55.75	-53.8025								55.75	-53.7415
55.8	-53.6499								55.8	-53.772
55.85	-54.0161								55.85	-53.5889
55.9	-54.0466								55.9	-53.6499
55.95	-54.0161								55.95	-53.833
56	-53.894								56	-53.7415
56.05	-53.6499								56.05	-53.5889
56.1	-54.0161								56.1	-53.5278
56.15	-54.0466								56.15	-53.833
56.2	-54.0771								56.2	-53.7415
56.25	-53.9551								56.25	-53.5583
56.3	-53.7109								56.3	-53.4058
56.35	-53.9551								56.35	-53.772
56.4	-54.2297								56.4	-53.6499
56.45	-54.0771								56.45	-53.5278
56.5	-53.9856								56.5	-53.3447
56.55	-53.772								56.55	-53.6804
56.6	-53.894								56.6	-53.7415
56.65	-54.1992								56.65	-53.5889
56.7	-54.0771								56.7	-53.4668
56.75	-54.1077								56.75	-53.4973
56.8	-53.9856								56.8	-53.7415
56.85	-53.772								56.85	-53.6499
56.9	-53.894								56.9	-53.5583
56.95	-54.1382								56.95	-53.4058
57	-54.0771								57	-53.7109
57.05	-54.1077								57.05	-53.7415
57.1	-53.9246								57.1	-53.7109
57.15	-53.7415								57.15	-53.4058
57.2	-53.9856								57.2	-53.4363
57.25	-54.1077								57.25	-53.7415
57.3	-54.1992								57.3	-53.772
57.35	-54.0771								57.35	-53.6499
57.4	-53.9246								57.4	-53.4058
57.45	-53.772								57.45	-53.5278
57.5	-53.8635								57.5	-53.8635
57.55	-53.9856								57.55	-53.772
57.6	-54.1687								57.6	-53.5889
57.65	-54.0771								57.65	-53.4363
57.7	-54.1382								57.7	-53.5889
57.75	-53.8635								57.75	-53.772
57.8	-53.7109								57.8	-53.7109
57.85	-53.894								57.85	-53.6499
57.9	-54.0466								57.9	-53.4973
57.95	-54.1077								57.95	-53.4058
58	-54.0466								58	-53.7109
58.05	-54.1077								58.05	-53.772
58.1	-53.9551								58.1	-53.6499
58.15	-53.7109								58.15	-53.4973
58.2	-53.7415								58.2	-53.3447
58.25	-53.9551								58.25	-53.4973
58.3	-54.1992								58.3	-53.6804
58.35	-54.1382								58.35	-53.7415
58.4	-54.0161								58.4	-53.7109
58.45	-54.1382								58.45	-53.4668
58.5	-54.0771								58.5	-53.2837
58.55	-53.894								58.55	-53.4973
58.6	-53.7415								58.6	-53.7109
58.65	-53.9246								58.65	-53.7109
58.7	-54.1687								58.7	-53.5889
58.75	-54.2297								58.75	-53.5583
58.8	-54.1382								58.8	-53.3142
58.85	-54.0771								58.85	-53.5278
58.9	-53.9551								58.9	-53.7415
58.95	-53.8025								58.95	-53.833
59	-54.1077								59	-53.7109
59.05	-54.1687								59.05	-53.6804
59.1	-54.0771								59.1	-53.4058
59.15	-53.772								59.15	-53.4363
59.2	-54.0466								59.2	-53.6499
59.25	-54.1382								59.25	-53.772
59.3	-53.772								59.3	-53.772
59.35	-54.1687								59.35	-53.7415
59.4	-54.0466								59.4	-53.7109
59.45	-53.6804								59.45	-53.4363
59.5	-54.1382								59.5	-53.3752
59.55	-54.0161								59.55	-53.5889
59.6	-53.772								59.6	-53.8025
59.65	-54.0771								59.65	-53.7415
59.7	-53.833								59.7	-53.7109
59.75	-53.9856								59.75	-53.6804
59.8	-54.0771								59.8	-53.5889
59.85	-53.6194								59.85	-53.3752
59.9	-54.1382								59.9	-53.4058
59.95	-53.9246								59.95	-53.5889
60	-53.9246								60	-53.7415
60.05	-53.9856								60.05	-53.6499
60.1	-53.6499								60.1	-53.5278
60.15	-54.1077								60.15	-53.2837
60.2	-54.0161								60.2	-53.6804
60.25	-53.8025								60.25	-53.8025
60.3	-54.1077								60.3	-53.6499
60.35	-53.833								60.35	-53.2837
60.4	-53.9856								60.4	-53.6804
60.45	-54.0161								60.45	-53.6804
60.5	-53.8025								60.5	-53.2837
60.55	-54.0466								60.55	-53.6499
60.6	-54.0771								60.6	-53.6804
60.65	-53.772								60.65	-53.3447
60.7	-54.1382								60.7	-53.8025
60.75	-54.1382								60.75	-53.5278
60.8	-53.894								60.8	-53.5583
60.85	-53.9551								60.85	-53.7109
60.9	-54.1687								60.9	-53.2532
60.95	-53.9856								60.95	-53.772
61	-53.894								61	-53.7415
61.05	-54.1077								61.05	-53.5278
61.1	-54.0161								61.1	-53.772
61.15	-53.772								61.15	-53.3142
61.2	-54.1992								61.2	-53.9246
61.25	-54.1382								61.25	-53.6194
61.3	-53.7109								61.3	-53.5583
61.35	-54.0161								61.35	-53.772
61.4	-54.1992								61.4	-53.4363
61.45	-53.9246								61.45	-53.9246
61.5	-53.8635								61.5	-53.6804
61.55	-54.1687								61.55	-53.5583
61.6	-54.1687								61.6	-53.9551
61.65	-53.6194								61.65	-53.6499
61.7	-53.9551								61.7	-53.6804
61.75	-54.1382								61.75	-53.772
61.8	-53.9856								61.8	-53.5278
61.85	-53.833								61.85	-53.8635
61.9	-54.1687								61.9	-53.772
61.95	-54.1382								61.95	-53.3142
62	-53.8635								62	-53.833
62.05	-54.0771								62.05	-53.7415
62.1	-54.1687								62.1	-53.4668
62.15	-54.0771								62.15	-53.7109
62.2	-53.772								62.2	-53.772
62.25	-54.1687								62.25	-53.4668
62.3	-54.1382								62.3	-53.7415
62.35	-54.1077								62.35	-53.7415
62.4	-53.9246								62.4	-53.4973
62.45	-54.2908								62.45	-53.5889
62.5	-54.1992								62.5	-53.8025
62.55	-54.0161								62.55	-53.5583
62.6	-54.0161								62.6	-53.4363
62.65	-54.2297								62.65	-53.8025
62.7	-54.2297								62.7	-53.7415
62.75	-54.0771								62.75	-53.3752
62.8	-53.9246								62.8	-53.7415
62.85	-54.2297								62.85	-53.7415
62.9	-54.2297								62.9	-53.4668
62.95	-54.0161								62.95	-53.6499
63	-53.9551								63	-53.833
63.05	-54.1687								63.05	-53.6804
63.1	-54.1992								63.1	-53.4668
63.15	-54.1077								63.15	-53.894
63.2	-53.8025								63.2	-53.772
63.25	-54.2602								63.25	-53.4363
63.3	-54.2297								63.3	-53.8025
63.35	-54.1077								63.35	-53.7415
63.4	-53.772								63.4	-53.6804
63.45	-54.1077								63.45	-53.6194
63.5	-54.2297								63.5	-54.0161
63.55	-54.1687								63.55	-53.8025
63.6	-53.833								63.6	-53.4973
63.65	-53.894								63.65	-53.7109
63.7	-54.1687								63.7	-53.8635
63.75	-54.0771								63.75	-53.7415
63.8	-54.0771								63.8	-53.3752
63.85	-53.833								63.85	-53.8635
63.9	-53.894								63.9	-53.833
63.95	-54.1077								63.95	-53.6804
64	-54.1687								64	-53.4058
64.05	-53.9551								64.05	-53.8025
64.1	-53.772								64.1	-53.7415
64.15	-54.0161								64.15	-53.5583
64.2	-54.2602								64.2	-53.4363
64.25	-54.1077								64.25	-53.8025
64.3	-53.9246								64.3	-53.772
64.35	-53.6499								64.35	-53.4973
64.4	-54.0161								64.4	-53.4668
64.45	-54.1687								64.45	-53.7415
64.5	-54.0466								64.5	-53.772
64.55	-53.9246								64.55	-53.4973
64.6	-53.772								64.6	-53.4668
64.65	-53.9246								64.65	-53.772
64.7	-54.1077								64.7	-53.7415
64.75	-54.0466								64.75	-53.4668
64.8	-54.0466								64.8	-53.4973
64.85	-53.894								64.85	-53.772
64.9	-53.772								64.9	-53.772
64.95	-53.9856								64.95	-53.6804
65	-54.1687								65	-53.4058
65.05	-54.0466								65.05	-53.7109
65.1	-53.9551								65.1	-53.8635
65.15	-53.772								65.15	-53.772
65.2	-53.7415								65.2	-53.4363
65.25	-54.0466								65.25	-53.6499
65.3	-54.1382								65.3	-53.833
65.35	-53.9551								65.35	-53.8025
65.4	-53.9551								65.4	-53.6194
65.45	-53.7415								65.45	-53.4058
65.5	-53.772								65.5	-53.833
65.55	-53.9551								65.55	-53.9551
65.6	-54.0466								65.6	-53.7415
65.65	-54.0161								65.65	-53.5278
65.7	-53.9551								65.7	-53.4363
65.75	-53.772								65.75	-53.8025
65.8	-53.5583								65.8	-53.8025
65.85	-53.833								65.85	-53.7109
65.9	-54.0466								65.9	-53.5278
65.95	-54.1077								65.95	-53.4363
66	-53.894								66	-53.8025
66.05	-54.0771								66.05	-53.7109
66.1	-53.833								66.1	-53.7109
66.15	-53.6804								66.15	-53.4973
66.2	-53.833								66.2	-53.4363
66.25	-54.1382								66.25	-53.7415
66.3	-54.0771								66.3	-53.7109
66.35	-54.0466								66.35	-53.7415
66.4	-53.9856								66.4	-53.6194
66.45	-53.9551								66.45	-53.3142
66.5	-53.894								66.5	-53.6194
66.55	-53.7109								66.55	-53.8635
66.6	-53.8025								66.6	-53.7109
66.65	-54.1077								66.65	-53.6194
66.7	-54.2602								66.7	-53.3752
66.75	-54.0161								66.75	-53.4058
66.8	-54.0771								66.8	-53.6499
66.85	-54.0771								66.85	-53.772
66.9	-53.9246								66.9	-53.7109
66.95	-53.7415								66.95	-53.6804
67	-53.8025								67	-53.4058
67.05	-54.0161								67.05	-53.3752
67.1	-54.1687								67.1	-53.6499
67.15	-54.0161								67.15	-53.8025
67.2	-53.9856								67.2	-53.8025
67.25	-53.833								67.25	-53.5889
67.3	-53.8635								67.3	-53.4668
67.35	-54.1687								67.35	-53.4668
67.4	-54.0161								67.4	-53.5889
67.45	-53.833								67.45	-53.6804
67.5	-53.772								67.5	-53.6804
67.55	-54.1382								67.55	-53.7415
67.6	-53.9551								67.6	-53.5583
67.65	-53.6194								67.65	-53.4058
67.7	-54.0466								67.7	-53.2837
67.75	-53.9246								67.75	-53.5889
67.8	-53.6804								67.8	-53.6499
67.85	-54.0466								67.85	-53.6499
67.9	-53.833								67.9	-53.5278
67.95	-53.9551								67.95	-53.5278
68	-53.9856								68	-53.2837
68.05	-53.6194								68.05	-53.2837
68.1	-54.1077								68.1	-53.3447
68.15	-53.894								68.15	-53.5583
68.2	-53.833								68.2	-53.5889
68.25	-54.0161								68.25	-53.5278
68.3	-53.772								68.3	-53.4973
68.35	-54.1382								68.35	-53.3142
68.4	-53.9551								68.4	-53.2532
68.45	-53.833								68.45	-53.5889
68.5	-54.1077								68.5	-53.4668
68.55	-53.772								68.55	-53.3447
68.6	-53.9551								68.6	-53.1616
68.65	-54.0161								68.65	-53.4973
68.7	-53.7109								68.7	-53.5278
68.75	-54.1382								68.75	-53.2837
68.8	-54.0161								68.8	-53.4363
68.85	-53.6499								68.85	-53.5583
68.9	-54.1687								68.9	-53.2532
68.95	-54.0466								68.95	-53.4668
69	-53.6194								69	-53.5583
69.05	-54.0466								69.05	-53.1616
69.1	-53.9856								69.1	-53.4668
69.15	-53.6499								69.15	-53.4058
69.2	-53.9551								69.2	-53.3142
69.25	-54.0161								69.25	-53.5889
69.3	-53.7415								69.3	-53.2227
69.35	-53.8635								69.35	-53.5278
69.4	-53.9246								69.4	-53.4363
69.45	-53.6804								69.45	-53.3447
69.5	-53.6499								69.5	-53.5278
69.55	-53.9246								69.55	-53.1006
69.6	-53.9246								69.6	-53.5583
69.65	-53.5583								69.65	-53.4363
69.7	-53.894								69.7	-53.3447
69.75	-53.894								69.75	-53.5583
69.8	-53.5278								69.8	-53.1921
69.85	-53.772								69.85	-53.5889
69.9	-53.8025								69.9	-53.4973
69.95	-53.7415								69.95	-53.1921
70	-53.4973								70	-53.5889
70.05	-53.9856								70.05	-53.4058
70.1	-53.8635								70.1	-53.3447
70.15	-53.6194								70.15	-53.5278
70.2	-53.8025								70.2	-53.2837
70.25	-54.0161								70.25	-53.4058
70.3	-53.772								70.3	-53.5889
70.35	-53.6194								70.35	-53.3752
70.4	-53.9246								70.4	-53.4058
70.45	-53.9856								70.45	-53.6499
70.5	-53.772								70.5	-53.3447
70.55	-53.7109								70.55	-53.4363
70.6	-53.9856								70.6	-53.5889
70.65	-53.9856								70.65	-53.4973
70.7	-53.7109								70.7	-53.4363
70.75	-53.8025								70.75	-53.6194
70.8	-54.1382								70.8	-53.4668
70.85	-53.8635								70.85	-53.3447
70.9	-53.6194								70.9	-53.6804
70.95	-53.8025								70.95	-53.5889
71	-54.1077								71	-53.2227
71.05	-53.894								71.05	-53.7109
71.1	-53.6804								71.1	-53.772
71.15	-53.833								71.15	-53.3447
71.2	-54.1077								71.2	-53.4668
71.25	-53.9246								71.25	-53.7415
71.3	-53.5889								71.3	-53.5583
71.35	-53.7109								71.35	-53.2837
71.4	-54.0466								71.4	-53.7109
71.45	-53.9551								71.45	-53.6194
71.5	-53.6804								71.5	-53.1616
71.55	-53.6194								71.55	-53.5278
71.6	-53.9551								71.6	-53.5889
71.65	-53.894								71.65	-53.4058
71.7	-53.772								71.7	-53.2837
71.75	-53.5278								71.75	-53.6804
71.8	-53.9856								71.8	-53.5278
71.85	-54.0466								71.85	-53.2227
71.9	-53.9551								71.9	-53.4668
71.95	-53.6499								71.95	-53.6194
72	-53.772								72	-53.3142
72.05	-53.9856								72.05	-53.1006
72.1	-54.0466								72.1	-53.5889
72.15	-53.8025								72.15	-53.4973
72.2	-53.6804								72.2	-53.2837
72.25	-53.894								72.25	-53.3142
72.3	-54.0771								72.3	-53.6194
72.35	-53.9856								72.35	-53.5278
72.4	-53.9551								72.4	-53.3142
72.45	-53.772								72.45	-53.3447
72.5	-54.0466								72.5	-53.6194
72.55	-54.1687								72.55	-53.4668
72.6	-54.1687								72.6	-53.1921
72.65	-53.9551								72.65	-53.4668
72.7	-53.7415								72.7	-53.6499
72.75	-54.1077								72.75	-53.4973
72.8	-54.1992								72.8	-53.1311
72.85	-54.1687								72.85	-53.5278
72.9	-53.9246								72.9	-53.6804
72.95	-53.833								72.95	-53.4668
73	-54.1077								73	-53.1006
73.05	-54.1992								73.05	-53.4363
73.1	-54.1077								73.1	-53.6194
73.15	-54.1077								73.15	-53.5583
73.2	-53.894								73.2	-53.2227
73.25	-53.894								73.25	-53.2837
73.3	-54.1382								73.3	-53.6804
73.35	-54.2297								73.35	-53.5889
73.4	-54.1382								73.4	-53.2837
73.45	-53.9856								73.45	-53.1921
73.5	-53.8025								73.5	-53.5889
73.55	-53.894								73.55	-53.4668
73.6	-54.1992								73.6	-53.3752
73.65	-54.1992								73.65	-53.0701
73.7	-54.1077								73.7	-53.3447
73.75	-53.9551								73.75	-53.5583
73.8	-53.8025								73.8	-53.4668
73.85	-53.9246								73.85	-53.2227
73.9	-54.1382								73.9	-53.1006
73.95	-54.1382								73.95	-53.4058
74	-54.0466								74	-53.5583
74.05	-54.1077								74.05	-53.4363
74.1	-53.9246								74.1	-53.1616
74.15	-53.7415								74.15	-53.1616
74.2	-53.894								74.2	-53.4668
74.25	-54.2297								74.25	-53.4363
74.3	-54.1992								74.3	-53.3447
74.35	-54.0771								74.35	-53.0701
74.4	-53.9856								74.4	-53.1006
74.45	-53.9551								74.45	-53.3752
74.5	-53.8025								74.5	-53.4363
74.55	-53.8635								74.55	-53.4668
74.6	-54.1077								74.6	-53.1616
74.65	-54.2602								74.65	-53.1006
74.7	-54.2297								74.7	-53.3142
74.75	-54.1687								74.75	-53.5889
74.8	-54.0466								74.8	-53.5278
74.85	-53.833								74.85	-53.1921
74.9	-53.8025								74.9	-53.1616
74.95	-53.9551								74.95	-53.3752
75	-54.1077								75	-53.5889
75.05	-54.1687								75.05	-53.4973
75.1	-54.1992								75.1	-53.4973
75.15	-54.0771								75.15	-53.2532
75.2	-53.894								75.2	-53.1921
75.25	-53.894								75.25	-53.4058
75.3	-53.6499								75.3	-53.5583
75.35	-53.8025								75.35	-53.4668
75.4	-53.9856								75.4	-53.4973
75.45	-54.1382								75.45	-53.2532
75.5	-54.0466								75.5	-53.0701
75.55	-54.0466								75.55	-53.2837
75.6	-53.6804								75.6	-53.4363
75.65	-53.772								75.65	-53.5278
75.7	-54.1382								75.7	-53.4363
75.75	-54.0161								75.75	-53.3447
75.8	-53.8025								75.8	-53.1006
75.85	-53.8025								75.85	-53.1921
75.9	-54.1687								75.9	-53.3447
75.95	-53.894								75.95	-53.4668
76	-53.7109								76	-53.3752
76.05	-54.0161								76.05	-53.4058
76.1	-54.0771								76.1	-53.1921
76.15	-53.833								76.15	-52.9785
76.2	-54.0771								76.2	-53.1311
76.25	-53.772								76.25	-53.3142
76.3	-54.1077								76.3	-53.4058
76.35	-54.0771								76.35	-53.3142
76.4	-53.6804								76.4	-53.3752
76.45	-54.1382								76.45	-53.2837
76.5	-53.9856								76.5	-53.1616
76.55	-53.9856								76.55	-53.1006
76.6	-54.1687								76.6	-53.3142
76.65	-53.6804								76.65	-53.4973
76.7	-54.1992								76.7	-53.4058
76.75	-54.0466								76.75	-53.3752
76.8	-53.894								76.8	-53.1311
76.85	-54.0771								76.85	-53.2227
76.9	-53.772								76.9	-53.4363
76.95	-54.1382								76.95	-53.4668
77	-54.1077								77	-53.1311
77.05	-53.7109								77.05	-53.4668
77.1	-54.1382								77.1	-53.4058
77.15	-54.0771								77.15	-53.2532
77.2	-53.7109								77.2	-53.3447
77.25	-54.0771								77.25	-53.4668
77.3	-54.0466								77.3	-53.009
77.35	-53.6194								77.35	-53.4058
77.4	-54.1077								77.4	-53.4363
77.45	-54.0771								77.45	-53.1006
77.5	-53.6804								77.5	-53.4058
77.55	-53.9856								77.55	-53.1311
77.6	-54.0161								77.6	-53.2837
77.65	-53.7109								77.65	-53.3447
77.7	-53.833								77.7	-53.1311
77.75	-54.0161								77.75	-53.3752
77.8	-53.9246								77.8	-53.0395
77.85	-53.6804								77.85	-53.3447
77.9	-54.0466								77.9	-53.2532
77.95	-54.0771								77.95	-53.0395
78	-53.7109								78	-53.3752
78.05	-54.0161								78.05	-52.948
78.1	-53.9856								78.1	-53.3447
78.15	-53.894								78.15	-53.3752
78.2	-53.833								78.2	-53.009
78.25	-54.1077								78.25	-53.4363
78.3	-53.9856								78.3	-53.1616
78.35	-53.7109								78.35	-53.3447
78.4	-54.0466								78.4	-53.3752
78.45	-54.0161								78.45	-53.1006
78.5	-53.9246								78.5	-53.4363
78.55	-53.833								78.55	-53.4363
78.6	-54.1382								78.6	-53.0395
78.65	-53.9551								78.65	-53.4668
78.7	-53.8635								78.7	-53.5278
78.75	-53.8635								78.75	-53.009
78.8	-54.1687								78.8	-53.4058
78.85	-54.0161								78.85	-53.4363
78.9	-53.7109								78.9	-53.0395
78.95	-53.9856								78.95	-53.3752
79	-54.1382								79	-53.4058
79.05	-53.8635								79.05	-53.009
79.1	-53.5583								79.1	-53.4363
79.15	-54.0161								79.15	-53.3447
79.2	-54.0771								79.2	-52.9785
79.25	-53.894								79.25	-53.2532
79.3	-53.6194								79.3	-53.3752
79.35	-53.9551								79.35	-53.1311
79.4	-54.0161								79.4	-53.0395
79.45	-54.0161								79.45	-53.3142
79.5	-53.6499								79.5	-53.2227
79.55	-53.9551								79.55	-53.0395
79.6	-54.0771								79.6	-53.3447
79.65	-53.9551								79.65	-53.3447
79.7	-53.6499								79.7	-52.9175
79.75	-53.8025								79.75	-53.3447
79.8	-54.0771								79.8	-53.3447
79.85	-53.9551								79.85	-53.1921
79.9	-53.7415								79.9	-53.1616
79.95	-53.6499								79.95	-53.3752
80	-54.0771								80	-53.2532
80.05	-53.9551								80.05	-52.9175
80.1	-53.894								80.1	-53.3752
80.15	-53.6499								80.15	-53.3142
80.2	-54.0161								80.2	-53.1616
80.25	-54.0466								80.25	-53.1921
80.3	-53.9246								80.3	-53.4363
80.35	-53.772								80.35	-53.3447
80.4	-53.7415								80.4	-52.9785
80.45	-54.1077								80.45	-53.3752
80.5	-53.9551								80.5	-53.4973
80.55	-53.9551								80.55	-53.2532
80.6	-53.7415								80.6	-53.0395
80.65	-53.9246								80.65	-53.4668
80.7	-54.0466								80.7	-53.4668
80.75	-54.0466								80.75	-53.2837
80.8	-53.9551								80.8	-53.1616
80.85	-53.6194								80.85	-53.4363
80.9	-53.8025								80.9	-53.4363
80.95	-54.0771								80.95	-53.1616
81	-53.9551								81	-53.2227
81.05	-53.9246								81.05	-53.4973
81.1	-53.6499								81.1	-53.4058
81.15	-53.7415								81.15	-53.1311
81.2	-53.894								81.2	-53.2532
81.25	-53.9551								81.25	-53.4058
81.3	-53.9246								81.3	-53.3447
81.35	-53.6499								81.35	-53.1006
81.4	-53.5583								81.4	-53.2532
81.45	-53.8635								81.45	-53.4058
81.5	-54.0161								81.5	-53.3447
81.55	-53.833								81.55	-53.009
81.6	-53.833								81.6	-53.1616
81.65	-53.5278								81.65	-53.4058
81.7	-53.6499								81.7	-53.3142
81.75	-53.8635								81.75	-53.1616
81.8	-53.8635								81.8	-53.0701
81.85	-53.833								81.85	-53.4363
81.9	-53.7109								81.9	-53.2837
81.95	-53.5583								81.95	-53.3142
82	-53.4973								82	-52.9785
82.05	-53.894								82.05	-53.2532
82.1	-54.0161								82.1	-53.4058
82.15	-53.833								82.15	-53.3447
82.2	-53.7415								82.2	-53.0701
82.25	-53.772								82.25	-53.009
82.3	-53.5583								82.3	-53.4058
82.35	-53.7109								82.35	-53.4668
82.4	-54.0161								82.4	-53.2837
82.45	-53.9551								82.45	-53.009
82.5	-53.9551								82.5	-53.2227
82.55	-53.8025								82.55	-53.5889
82.6	-53.7109								82.6	-53.3752
82.65	-53.5889								82.65	-53.2532
82.7	-53.8025								82.7	-53.009
82.75	-53.8635								82.75	-53.2532
82.8	-53.9856								82.8	-53.4973
82.85	-53.894								82.85	-53.3447
82.9	-53.894								82.9	-53.1921
82.95	-53.6499								82.95	-53.009
83	-53.5889								83	-53.1921
83.05	-53.6499								83.05	-53.4668
83.1	-53.833								83.1	-53.3752
83.15	-53.9856								83.15	-53.2837
83.2	-53.9246								83.2	-53.0701
83.25	-53.894								83.25	-53.1616
83.3	-53.8635								83.3	-53.2837
83.35	-53.7415								83.35	-53.4058
83.4	-53.4973								83.4	-53.3142
83.45	-53.4363								83.45	-53.1921
83.5	-53.6194								83.5	-52.9785
83.55	-53.8025								83.55	-53.1921
83.6	-53.8025								83.6	-53.4363
83.65	-53.8635								83.65	-53.3447
83.7	-53.8635								83.7	-53.3142
83.75	-53.772								83.75	-53.0395
83.8	-53.5889								83.8	-53.009
83.85	-53.4973								83.85	-53.2532
83.9	-53.833								83.9	-53.4668
83.95	-53.9246								83.95	-53.3447
84	-53.772								84	-53.4058
84.05	-53.4363								84.05	-53.1616
84.1	-53.6804								84.1	-52.9785
84.15	-53.9246								84.15	-53.1616
84.2	-53.772								84.2	-53.4668
84.25	-53.4058								84.25	-53.4058
84.3	-53.833								84.3	-53.3752
84.35	-53.8025								84.35	-53.2227
84.4	-53.3752								84.4	-53.1616
84.45	-53.8025								84.45	-53.0701
84.5	-53.6804								84.5	-53.1921
84.55	-53.5889								84.55	-53.4363
84.6	-53.833								84.6	-53.4668
84.65	-53.4363								84.65	-53.4363
84.7	-53.8635								84.7	-53.2227
84.75	-53.894								84.75	-53.1616
84.8	-53.4058								84.8	-52.9785
84.85	-53.8635								84.85	-53.1616
84.9	-53.6194								84.9	-53.3447
84.95	-53.8635								84.95	-53.3752
85	-53.8025								85	-53.3142
85.05	-53.4668								85.05	-53.2837
85.1	-53.8635								85.1	-53.009
85.15	-53.7109								85.15	-53.1006
85.2	-53.6194								85.2	-53.4668
85.25	-53.833								85.25	-53.2837
85.3	-53.5278								85.3	-53.009
85.35	-53.7415								85.35	-53.0701
85.4	-53.7109								85.4	-53.2837
85.45	-53.3752								85.45	-53.1311
85.5	-53.772								85.5	-53.1921
85.55	-53.772								85.55	-53.3142
85.6	-53.3752								85.6	-53.0395
85.65	-53.7415								85.65	-53.2227
85.7	-53.6194								85.7	-53.3752
85.75	-53.3752								85.75	-52.948
85.8	-53.6804								85.8	-53.4058
85.85	-53.6499								85.85	-53.2837
85.9	-53.4058								85.9	-53.1311
85.95	-53.6194								85.95	-53.3447
86	-53.7109								86	-52.9175
86.05	-53.4668								86.05	-53.4668
86.1	-53.3447								86.1	-53.2227
86.15	-53.8025								86.15	-53.2227
86.2	-53.6804								86.2	-53.3752
86.25	-53.2837								86.25	-52.9785
86.3	-53.6499								86.3	-53.4058
86.35	-53.772								86.35	-53.2532
86.4	-53.4668								86.4	-53.2532
86.45	-53.5278								86.45	-53.5278
86.5	-53.7109								86.5	-52.9785
86.55	-53.6499								86.55	-53.4363
86.6	-53.3447								86.6	-53.2837
86.65	-53.6499								86.65	-53.1616
86.7	-53.6499								86.7	-53.4668
86.75	-53.5278								86.75	-53.1616
86.8	-53.5278								86.8	-53.2532
86.85	-53.7109								86.85	-53.4668
86.9	-53.6499								86.9	-53.1616
86.95	-53.4363								86.95	-53.2227
87	-53.7109								87	-53.2227
87.05	-53.6804								87.05	-53.0701
87.1	-53.5889								87.1	-53.3142
87.15	-53.2837								87.15	-53.3752
87.2	-53.7109								87.2	-53.009
87.25	-53.6804								87.25	-53.2532
87.3	-53.4668								87.3	-53.4058
87.35	-53.3447								87.35	-53.1616
87.4	-53.6804								87.4	-53.1616
87.45	-53.5889								87.45	-53.4058
87.5	-53.3752								87.5	-53.1616
87.55	-53.3447								87.55	-53.1616
87.6	-53.6499								87.6	-53.4668
87.65	-53.6804								87.65	-53.1921
87.7	-53.4058								87.7	-53.009
87.75	-53.2532								87.75	-53.4058
87.8	-53.7109								87.8	-53.3447
87.85	-53.6194								87.85	-52.948
87.9	-53.4363								87.9	-53.2837
87.95	-53.2227								87.95	-53.3752
88	-53.6499								88	-53.1921
88.05	-53.6194								88.05	-53.1006
88.1	-53.3752								88.1	-53.3752
88.15	-53.1921								88.15	-53.1311
88.2	-53.6804								88.2	-52.948
88.25	-53.6499								88.25	-53.3752
88.3	-53.5278								88.3	-53.4058
88.35	-53.1921								88.35	-52.9785
88.4	-53.4973								88.4	-53.2532
88.45	-53.7415								88.45	-53.3142
88.5	-53.5278								88.5	-53.2532
88.55	-53.3447								88.55	-53.009
88.6	-53.3447								88.6	-53.3142
88.65	-53.6804								88.65	-53.2532
88.7	-53.5583								88.7	-53.0395
88.75	-53.4668								88.75	-53.2227
88.8	-53.2837								88.8	-53.3447
88.85	-53.4363								88.85	-53.3142
88.9	-53.5583								88.9	-52.948
88.95	-53.5583								88.95	-53.3447
89	-53.5583								89	-53.3447
89.05	-53.1616								89.05	-53.0395
89.1	-53.3752								89.1	-52.9785
89.15	-53.5889								89.15	-53.3142
89.2	-53.5583								89.2	-53.3142
89.25	-53.4668								89.25	-53.0701
89.3	-53.1921								89.3	-52.9785
89.35	-53.3752								89.35	-53.3142
89.4	-53.6194								89.4	-53.3142
89.45	-53.4973								89.45	-53.009
89.5	-53.5278								89.5	-52.9175
89.55	-53.2532								89.55	-53.2837
89.6	-53.2837								89.6	-53.2837
89.65	-53.5889								89.65	-53.009
89.7	-53.6499								89.7	-52.948
89.75	-53.5583								89.75	-53.3752
89.8	-53.3142								89.8	-53.2227
89.85	-53.2532								89.85	-53.009
89.9	-53.4668								89.9	-52.948
89.95	-53.5583								89.95	-53.3142
90	-53.5889								90	-53.2532
90.05	-53.5889								90.05	-53.1311
90.1	-53.3447								90.1	-52.8564
90.15	-53.2532								90.15	-53.1921
90.2	-53.4058								90.2	-53.2837
90.25	-53.6804								90.25	-53.1311
90.3	-53.5583								90.3	-52.948
90.35	-53.5583								90.35	-53.1616
90.4	-53.3447								90.4	-53.3142
90.45	-53.2837								90.45	-53.2227
90.5	-53.4668								90.5	-53.0395
90.55	-53.5889								90.55	-52.887
90.6	-53.6499								90.6	-53.2837
90.65	-53.6499								90.65	-53.1921
90.7	-53.5583								90.7	-53.1006
90.75	-53.2227								90.75	-52.9785
90.8	-53.2837								90.8	-52.9785
90.85	-53.4668								90.85	-53.2227
90.9	-53.6194								90.9	-53.1006
90.95	-53.4668								90.95	-53.1311
91	-53.5278								91	-52.887
91.05	-53.4363								91.05	-53.009
91.1	-53.2532								91.1	-53.1311
91.15	-53.1616								91.15	-53.1311
91.2	-53.3142								91.2	-53.0395
91.25	-53.5278								91.25	-52.8259
91.3	-53.4973								91.3	-52.8564
91.35	-53.4668								91.35	-53.1006
91.4	-53.4363								91.4	-53.1006
91.45	-53.2532								91.45	-53.1311
91.5	-53.1616								91.5	-52.8564
91.55	-53.1616								91.55	-52.7344
91.6	-53.3142								91.6	-53.009
91.65	-53.4363								91.65	-53.2227
91.7	-53.4668								91.7	-53.0701
91.75	-53.4363								91.75	-52.887
91.8	-53.3752								91.8	-52.887
91.85	-53.2532								91.85	-52.8564
91.9	-53.1921								91.9	-53.0701
91.95	-53.0395								91.95	-53.0701
92	-53.1006								92	-53.1311
92.05	-53.2837								92.05	-53.009
92.1	-53.4973								92.1	-52.7039
92.15	-53.3752								92.15	-52.8564
92.2	-53.3752								92.2	-53.1921
92.25	-53.1921								92.25	-53.1921
92.3	-53.1006								92.3	-53.0701
92.35	-53.3752								92.35	-52.948
92.4	-53.4058								92.4	-52.8564
92.45	-53.3447								92.45	-52.887
92.5	-53.1006								92.5	-53.0701
92.55	-53.5583								92.55	-53.2532
92.6	-53.3752								92.6	-53.1311
92.65	-53.0395								92.65	-53.1006
92.7	-53.4668								92.7	-52.887
92.75	-53.4668								92.75	-52.7039
92.8	-53.0395								92.8	-52.9175
92.85	-53.4973								92.85	-53.1311
92.9	-53.3752								92.9	-53.1616
92.95	-53.1921								92.95	-53.009
93	-53.3752								93	-53.0701
93.05	-53.1006								93.05	-52.8259
93.1	-53.4058								93.1	-52.8564
93.15	-53.4363								93.15	-52.7344
93.2	-53.0395								93.2	-52.948
93.25	-53.4668								93.25	-53.1006
93.3	-53.1616								93.3	-53.0701
93.35	-53.2532								93.35	-52.948
93.4	-53.3752								93.4	-52.7039
93.45	-52.9175								93.45	-52.7649
93.5	-53.4363								93.5	-53.0701
93.55	-53.2837								93.55	-53.009
93.6	-53.1311								93.6	-52.8564
93.65	-53.4363								93.65	-52.7954
93.7	-53.1311								93.7	-53.1006
93.75	-53.1921								93.75	-53.0395
93.8	-53.4363								93.8	-52.6428
93.85	-53.1616								93.85	-53.1616
93.9	-53.1006								93.9	-53.009
93.95	-53.4363								93.95	-52.6733
94	-53.1616								94	-53.0395
94.05	-53.1921								94.05	-52.8564
94.1	-53.3142								94.1	-52.9175
94.15	-53.2227								94.15	-52.9785
94.2	-53.1311								94.2	-52.7344
94.25	-53.4668								94.25	-53.2227
94.3	-53.2837								94.3	-52.887
94.35	-53.0701								94.35	-52.9785
94.4	-53.3447								94.4	-53.1311
94.45	-53.3752								94.45	-52.7954
94.5	-53.0701								94.5	-53.1921
94.55	-53.3447								94.55	-52.8259
94.6	-53.4973								94.6	-53.0395
94.65	-53.3142								94.65	-53.0701
94.7	-53.0395								94.7	-52.7954
94.75	-53.5278								94.75	-53.0395
[truncated: 63,640 more rows]
