# Supplementary material for: Intrinsic mechanical sensitivity of mammalian auditory neurons as a contributor to sound-driven neural activity
Source: eLife. 2022 Mar 10;11:e74948. doi: 10.7554/eLife.74948 (PMC8942473; doi:10.7554/eLife.74948)
Supplement: Figure 1—figure supplement 6—source data 1. [file elife-74948-fig1-figsupp6-data1.xls]

## Sheet: Fig. 1 suppl 6a
Time (ms)	apex	MP (mV)			apex					base				base				Figure 1- figure supplement 6
0	-63.4155	-65.4907	-65.3686	-64.9719					0	-58.6853	-57.4341	-57.9224	-58.0444					Response properties of adult mouse SGNs to mechanical stimulation.
0.05	-63.385	-65.4602	-65.5823	-65.094					0.05	-58.4717	-57.6172	-57.8613	-58.3191
0.1	-63.2629	-65.4602	-65.4602	-65.033					0.1	-58.5327	-57.5561	-58.0749	-58.3496
0.15	-63.6597	-65.4297	-65.2771	-64.9414					0.15	-58.3191	-57.312	-58.0749	-58.1665
0.2	-63.5681	-65.3992	-65.1855	-64.9109					0.2	-58.6548	-57.373	-57.8918	-58.1665
0.25	-63.446	-65.2161	-65.4602	-64.8193					0.25	-58.5937	-57.5561	-57.8918	-58.2581
0.3	-63.446	-65.1245	-65.3686	-64.7583					0.3	-58.5022	-57.5561	-58.0749	-58.3191
0.35	-63.7817	-65.3686	-65.3076	-64.7888					0.35	-58.4106	-57.2815	-58.0749	-57.9834
0.4	-63.6902	-65.4907	-65.033	-64.6362					0.4	-58.5022	-57.3425	-57.8613	-58.3496
0.45	-63.6291	-65.5212	-65.2161	-64.6362					0.45	-58.6243	-57.4951	-57.8308	-58.136
0.5	-63.5986	-65.4297	-65.3686	-64.9414					0.5	-58.5327	-57.4951	-58.197	-58.136
0.55	-63.8428	-65.5212	-65.2466	-64.8804					0.55	-58.5022	-57.312	-58.0749	-58.136
0.6	-63.7817	-65.3686	-65.0024	-64.9109					0.6	-58.3191	-57.2205	-57.8613	-58.2886
0.65	-63.6597	-65.2161	-65.094	-64.8498					0.65	-58.5327	-57.6477	-57.7393	-58.2275
0.7	-63.5986	-65.0635	-65.3076	-64.8804					0.7	-58.5937	-57.5256	-58.136	-58.0749
0.75	-63.9343	-65.2771	-65.1855	-64.9109					0.75	-58.5937	-57.4036	-58.136	-58.2275
0.8	-63.8733	-65.3992	-65.0635	-64.6362					0.8	-58.4412	-57.1899	-57.9224	-58.3191
0.85	-63.7512	-65.3686	-64.7888	-64.4836					0.85	-58.2275	-57.5256	-57.7087	-58.136
0.9	-63.6597	-65.2771	-65.1245	-64.6362					0.9	-58.6548	-57.5561	-58.0749	-58.0139
0.95	-63.9648	-65.1245	-65.094	-64.8193					0.95	-58.7158	-57.4341	-58.1665	-58.2886
1	-63.9343	-65.1245	-64.9719	-64.7888					1	-58.5632	-57.3425	-58.0139	-58.197
1.05	-63.9954	-65.3686	-64.8498	-64.7278					1.05	-58.4412	-57.4036	-57.8613	-58.1055
1.1	-63.7512	-65.3381	-64.6973	-64.4226					1.1	-58.3801	-57.6477	-57.9529	-58.1055
1.15	-63.9954	-65.033	-64.9414	-64.6973					1.15	-58.7463	-57.4341	-58.136	-58.3191
1.2	-64.0564	-65.3381	-64.9109	-64.7583					1.2	-58.6548	-57.4646	-57.9834	-58.3191
1.25	-64.0564	-65.2771	-64.8193	-64.6667					1.25	-58.5937	-57.2815	-57.9224	-58.1665
1.3	-63.9038	-65.0635	-64.6973	-64.4531					1.3	-58.4717	-57.6172	-57.7698	-58.1055
1.35	-63.8428	-65.155	-64.6667	-64.8498					1.35	-58.3801	-57.6782	-58.0749	-58.3191
1.4	-64.1174	-65.3076	-64.8498	-64.7278					1.4	-58.6853	-57.5561	-58.0749	-58.2581
1.45	-63.9954	-65.1245	-64.8193	-64.331					1.45	-58.5937	-57.5867	-57.9834	-58.2275
1.5	-63.9648	-65.155	-64.7278	-64.5752					1.5	-58.5937	-57.4646	-57.9224	-58.1665
1.55	-63.7512	-65.1245	-64.6667	-64.6057					1.55	-58.5937	-57.6782	-57.9529	-58.2581
1.6	-63.9648	-64.9719	-64.4836	-64.3616					1.6	-58.4717	-57.7087	-58.0139	-58.3496
1.65	-64.0869	-65.155	-64.5447	-64.5752					1.65	-58.5327	-57.7087	-58.0444	-58.1665
1.7	-64.0259	-65.2161	-64.6667	-64.4836					1.7	-58.5937	-57.7698	-58.0139	-58.1055
1.75	-63.9648	-64.8193	-64.5142	-64.1785					1.75	-58.6243	-57.4951	-57.9224	-58.2581
1.8	-63.8123	-65.2161	-64.331	-64.5447					1.8	-58.6243	-57.8003	-57.7393	-58.2275
1.85	-63.9648	-65.1245	-64.1785	-64.4531					1.85	-58.4412	-57.9834	-57.9529	-58.2275
1.9	-63.9954	-64.9414	-64.209	-64.1479					1.9	-58.3801	-57.9529	-58.0139	-58.0749
1.95	-64.0564	-65.2161	-64.4226	-64.5447					1.95	-58.7158	-57.7393	-58.0139	-58.2275
2	-63.8428	-65.033	-64.3921	-64.3616					2	-58.7463	-57.5867	-57.8308	-58.3496
2.05	-63.6902	-65.2466	-64.3616	-64.27					2.05	-58.5327	-57.9224	-57.7087	-58.2886
2.1	-63.9648	-65.3076	-64.1479	-64.4836					2.1	-58.6243	-58.0139	-58.0139	-58.1665
2.15	-63.9648	-64.8804	-63.9343	-64.209					2.15	-58.5327	-57.9529	-58.0749	-58.1055
2.2	-63.9648	-65.3076	-64.27	-64.3921					2.2	-58.4717	-57.9224	-57.8613	-58.2581
2.25	-63.8428	-65.2466	-64.3616	-64.331					2.25	-58.6243	-57.8003	-57.8308	-58.197
2.3	-63.6597	-64.9414	-64.209	-64.1479					2.3	-58.6853	-57.8003	-57.7087	-58.1665
2.35	-63.9343	-65.2771	-64.1174	-64.27					2.35	-58.7158	-58.0139	-57.9224	-58.0139
2.4	-64.1174	-65.1855	-64.1174	-64.3005					2.4	-58.5937	-57.9224	-57.9834	-58.2581
2.45	-64.0564	-64.8498	-63.9648	-64.1174					2.45	-58.5937	-58.0139	-57.8308	-58.2581
2.5	-63.9038	-65.2771	-63.9954	-64.1479					2.5	-58.3801	-57.9834	-57.9224	-58.197
2.55	-63.7817	-65.155	-64.0869	-64.27					2.55	-58.6243	-57.7698	-57.8613	-58.1055
2.6	-63.8733	-64.9109	-63.9954	-64.0259					2.6	-58.7769	-57.9529	-57.6782	-57.9834
2.65	-64.0869	-65.2466	-64.0259	-64.1174					2.65	-58.6243	-58.136	-57.9529	-58.197
2.7	-64.1174	-65.2466	-63.9343	-64.209					2.7	-58.6243	-58.0749	-57.9834	-58.2581
2.75	-64.0259	-64.9414	-63.7817	-63.9648					2.75	-58.5937	-58.0139	-57.9224	-58.1665
2.8	-63.9343	-65.094	-63.8123	-63.8123					2.8	-58.3496	-57.8918	-57.8613	-58.0444
2.85	-63.7512	-65.155	-64.1174	-64.209					2.85	-58.3801	-57.8613	-57.8003	-58.0139
2.9	-64.0259	-65.033	-64.1479	-64.1479					2.9	-58.5937	-58.0444	-57.7087	-58.3191
2.95	-64.1174	-65.033	-63.9648	-63.7817					2.95	-58.7463	-58.1055	-58.0444	-58.197
3	-64.0869	-65.2161	-63.9954	-63.9038					3	-58.6548	-58.0749	-57.9529	-58.136
3.05	-64.1785	-65.094	-63.9954	-63.9954					3.05	-58.5022	-58.0749	-57.8308	-58.0444
3.1	-64.0259	-64.7888	-63.8428	-63.9038					3.1	-58.5022	-58.0749	-57.9834	-58.0749
3.15	-63.8428	-65.094	-63.8123	-63.6902					3.15	-58.4717	-57.8308	-57.8613	-58.2886
3.2	-63.9954	-65.094	-64.0259	-63.9954					3.2	-58.2886	-57.8003	-57.5867	-58.3496
3.25	-64.209	-65.033	-64.0869	-63.9038					3.25	-58.4412	-58.136	-57.8918	-58.2581
3.3	-64.209	-65.0024	-64.0259	-63.8733					3.3	-58.6243	-58.1665	-58.0444	-58.2275
3.35	-64.1479	-65.2161	-63.9954	-63.7207					3.35	-58.6853	-58.0139	-57.9834	-58.0444
3.4	-63.9954	-65.155	-63.9648	-63.9648					3.4	-58.4717	-58.0444	-57.8613	-58.2886
3.45	-63.8123	-64.8498	-63.8733	-63.9954					3.45	-58.4717	-58.0139	-57.8613	-58.3496
3.5	-63.9954	-65.094	-63.9648	-63.7817					3.5	-58.4717	-57.8308	-57.8308	-58.3801
3.55	-64.1174	-65.094	-64.1174	-63.9038					3.55	-58.4412	-57.7393	-57.9224	-58.2581
3.6	-64.1785	-65.094	-64.209	-64.0564					3.6	-58.1665	-58.0444	-57.8918	-58.2275
3.65	-64.0564	-64.8498	-64.209	-63.9343					3.65	-58.4717	-58.1055	-58.0139	-58.197
3.7	-64.1479	-65.1245	-64.1785	-63.6291					3.7	-58.5937	-58.1665	-58.0139	-58.4412
3.75	-63.9648	-65.0024	-64.27	-63.7512					3.75	-58.6548	-58.0444	-58.0444	-58.4106
3.8	-63.7817	-64.8804	-64.0869	-64.0564					3.8	-58.5937	-58.0139	-57.8918	-58.3496
3.85	-63.9954	-64.8498	-63.9954	-63.9038					3.85	-58.4412	-57.9529	-57.8003	-58.2581
3.9	-64.1479	-65.155	-63.8733	-63.6291					3.9	-58.4412	-57.9834	-57.7393	-58.1055
3.95	-64.1785	-65.0024	-64.0564	-63.9038					3.95	-58.3496	-57.9529	-57.9834	-58.2886
4	-64.0564	-64.9109	-64.2395	-64.0869					4	-58.3191	-58.1665	-58.0749	-58.4412
4.05	-63.9343	-64.8804	-64.209	-63.9648					4.05	-58.5937	-58.1665	-58.1665	-58.3496
4.1	-63.9038	-65.094	-64.1174	-63.8123					4.1	-58.5022	-58.136	-58.0444	-58.3496
4.15	-63.6291	-65.1245	-64.209	-63.8733					4.15	-58.5022	-58.0444	-58.197	-58.3191
4.2	-63.7512	-64.9109	-64.1174	-64.209					4.2	-58.2886	-58.0139	-57.9834	-58.0749
4.25	-63.9648	-64.9414	-64.0259	-63.9954					4.25	-58.4106	-57.9834	-57.9834	-58.1055
4.3	-63.9038	-65.1245	-63.9343	-63.8428					4.3	-58.5632	-57.9529	-57.8613	-58.3496
4.35	-63.9038	-64.9719	-63.9038	-63.7817					4.35	-58.5937	-57.9224	-58.0749	-58.3496
4.4	-63.8123	-64.9719	-64.0869	-64.0869					4.4	-58.197	-58.136	-58.0139	-58.2581
4.45	-63.7512	-64.9719	-64.0869	-64.0869					4.45	-58.6548	-58.1665	-58.136	-58.197
4.5	-63.6902	-65.1245	-64.1785	-63.9954					4.5	-58.5022	-58.0749	-58.197	-58.197
4.55	-63.5986	-65.033	-64.1479	-63.8123					4.55	-58.3496	-57.9834	-58.1055	-58.0444
4.6	-63.6597	-64.9109	-64.0869	-64.1479					4.6	-58.5632	-57.9224	-58.0444	-58.1665
4.65	-63.8123	-64.8804	-64.1174	-64.1479					4.65	-58.4717	-57.9529	-58.0749	-58.1665
4.7	-63.8123	-65.1245	-63.9343	-64.1785					4.7	-58.3496	-58.197	-58.0749	-58.2581
4.75	-63.8428	-65.0635	-63.8428	-63.9954					4.75	-58.6243	-57.9834	-57.9529	-58.197
4.8	-63.7512	-65.0635	-63.8733	-64.0564					4.8	-58.4717	-57.9224	-58.0139	-58.197
4.85	-63.8123	-64.8193	-64.0869	-64.3005					4.85	-58.2581	-57.8308	-58.2275	-58.0139
4.9	-63.7207	-65.155	-64.0869	-64.1785					4.9	-58.5327	-58.1055	-58.2581	-57.9224
4.95	-63.5986	-65.0635	-64.0869	-64.1174					4.95	-58.4717	-58.0139	-58.2275	-58.136
5	-63.4766	-65.0635	-64.0869	-63.9648					5	-58.3496	-57.8613	-58.136	-58.3191
5.05	-63.5376	-64.9414	-64.0259	-64.1479					5.05	-58.4717	-58.1055	-57.9834	-58.2275
5.1	-63.6902	-65.0024	-64.2395	-64.3005					5.1	-58.2581	-58.0749	-58.136	-58.136
5.15	-63.7817	-65.2161	-64.1479	-64.209					5.15	-58.6548	-57.8003	-58.3496	-58.1665
5.2	-63.8733	-65.094	-64.0259	-64.0564					5.2	-58.4412	-58.0444	-58.197	-58.0749
5.25	-63.8733	-65.033	-64.0869	-63.9038					5.25	-58.2886	-58.0444	-58.0139	-57.8918
5.3	-63.7207	-64.8804	-64.27	-64.1785					5.3	-58.5022	-57.8003	-58.197	-57.9529
5.35	-63.7512	-65.1855	-64.1174	-64.3921					5.35	-58.4106	-58.0444	-58.2886	-58.0749
5.4	-63.6902	-65.2771	-64.0564	-64.209					5.4	-58.4412	-57.9834	-58.1665	-58.197
5.45	-63.5681	-65.2771	-64.3921	-64.209					5.45	-58.3801	-57.9224	-58.0139	-58.1665
5.5	-63.4766	-65.1245	-64.1479	-64.0259					5.5	-58.1055	-58.1055	-58.4106	-58.136
5.55	-63.385	-65.033	-64.2395	-64.209					5.55	-58.5022	-57.8613	-58.2275	-58.1055
5.6	-63.5681	-65.2466	-64.4836	-64.331					5.6	-58.3191	-58.1055	-57.9529	-58.136
5.65	-63.6902	-65.1855	-64.331	-64.331					5.65	-58.1055	-57.9834	-58.2581	-58.0139
5.7	-63.8428	-65.2466	-64.4836	-64.2395					5.7	-58.5327	-57.8003	-58.2275	-57.8918
5.75	-63.7817	-65.1245	-64.4226	-63.9648					5.75	-58.4412	-58.0139	-58.1055	-57.8918
5.8	-63.7817	-64.9109	-64.209	-64.1785					5.8	-58.136	-57.8613	-58.2581	-58.0749
5.85	-63.7207	-65.155	-64.5142	-64.3005					5.85	-58.4106	-58.0139	-58.1055	-58.0444
5.9	-63.5071	-65.1245	-64.5447	-64.331					5.9	-58.3191	-57.9834	-58.2581	-58.136
5.95	-63.7207	-65.2161	-64.2395	-64.2395					5.95	-58.1055	-57.6782	-58.197	-58.1055
6	-63.8428	-65.1245	-64.6362	-64.1174					6	-58.4106	-57.9834	-57.9529	-58.0444
6.05	-63.7512	-64.9109	-64.4226	-64.1479					6.05	-58.3191	-57.9834	-58.2886	-58.0444
6.1	-63.5986	-65.2466	-64.4226	-64.4226					6.1	-58.0444	-57.7698	-58.3496	-57.9529
6.15	-63.6291	-65.3381	-64.4531	-64.4836					6.15	-58.3801	-58.0444	-58.1055	-57.8918
6.2	-63.7817	-65.3076	-64.3921	-64.3005					6.2	-58.2275	-57.8613	-58.2581	-57.8918
6.25	-63.7512	-65.1245	-64.5752	-64.3005					6.25	-58.2275	-57.8918	-58.1665	-58.1055
6.3	-63.4766	-64.9414	-64.6667	-64.1479					6.3	-58.2275	-57.9834	-58.4106	-58.1665
6.35	-63.7817	-65.1855	-64.4836	-64.2395					6.35	-58.2886	-57.8613	-58.3191	-58.136
6.4	-63.7817	-65.4297	-64.5752	-64.3921					6.4	-58.197	-57.8308	-58.136	-58.1055
6.45	-63.5681	-65.3076	-64.6667	-64.331					6.45	-58.0749	-58.0749	-58.4717	-57.8918
6.5	-63.8733	-65.3381	-64.3921	-64.331					6.5	-58.3191	-57.8613	-58.3801	-57.9529
6.55	-63.9038	-65.1855	-64.7583	-64.2395					6.55	-58.2275	-57.7393	-58.0749	-58.197
6.6	-63.6597	-65.155	-64.6973	-64.1174					6.6	-57.9529	-57.9834	-58.5022	-58.0749
6.65	-63.9343	-65.3381	-64.4836	-64.1785					6.65	-58.197	-57.9529	-58.4412	-58.0444
6.7	-63.9648	-65.4602	-64.5447	-64.3005					6.7	-58.1665	-57.6782	-58.197	-57.9529
6.75	-63.7817	-65.4297	-64.6973	-64.4226					6.75	-58.136	-58.0139	-58.5022	-58.197
6.8	-63.9954	-65.5823	-64.6973	-64.331					6.8	-57.9834	-57.9834	-58.4106	-58.1055
6.85	-63.9954	-65.4907	-64.6362	-64.3616					6.85	-58.2886	-57.7393	-58.197	-57.7698
6.9	-63.7207	-65.2466	-64.9109	-64.2395					6.9	-58.197	-58.0444	-58.5632	-58.136
6.95	-64.1174	-65.5212	-64.9109	-64.1479					6.95	-57.9224	-57.8918	-58.3801	-58.136
7	-64.1174	-65.7043	-64.5752	-64.3921					7	-58.1055	-57.7698	-58.3191	-57.7393
7.05	-63.9038	-65.6433	-64.8193	-64.4226					7.05	-58.136	-57.8918	-58.4106	-58.136
7.1	-64.1479	-65.6128	-64.9414	-64.3921					7.1	-58.0444	-57.9529	-58.5022	-58.0444
7.15	-64.1479	-65.4907	-64.9109	-64.3921					7.15	-57.8613	-57.9529	-58.3801	-57.8003
7.2	-64.0869	-65.3076	-64.8804	-64.3005					7.2	-58.1665	-57.7698	-58.3191	-58.1055
7.25	-64.2395	-65.5212	-65.0635	-64.209					7.25	-58.0444	-58.197	-58.5327	-58.0139
7.3	-64.1174	-65.6433	-65.033	-64.0259					7.3	-57.9224	-57.9529	-58.5632	-57.9834
7.35	-64.1785	-65.6738	-64.7583	-64.2395					7.35	-57.8918	-57.8308	-58.197	-58.136
7.4	-64.3921	-65.5517	-64.9719	-64.4226					7.4	-58.1055	-57.9224	-58.5022	-57.9529
7.45	-64.2395	-65.5823	-65.155	-64.3921					7.45	-57.9834	-58.1055	-58.5022	-58.136
7.5	-64.209	-65.3992	-65.033	-64.2395					7.5	-57.8918	-57.9529	-58.5022	-57.9834
7.55	-64.4531	-65.3381	-64.9109	-64.27					7.55	-57.9224	-57.8003	-58.3496	-57.8308
7.6	-64.331	-65.5517	-65.2771	-64.209					7.6	-58.1055	-58.0749	-58.6243	-58.136
7.65	-64.209	-65.7654	-65.1855	-64.0259					7.65	-57.9834	-58.0444	-58.5327	-58.1055
7.7	-64.5142	-65.7959	-65.094	-64.1479					7.7	-57.8613	-57.8918	-58.3801	-57.8308
7.75	-64.4226	-65.6433	-65.033	-64.2395					7.75	-57.8918	-57.8003	-58.4717	-58.136
7.8	-64.331	-65.5212	-65.3686	-64.3616					7.8	-58.0749	-58.0749	-58.6548	-57.8918
7.85	-64.5142	-65.4907	-65.2771	-64.27					7.85	-57.9529	-58.0444	-58.4717	-57.9224
7.9	-64.5142	-65.3076	-65.1855	-64.209					7.9	-57.7698	-57.8003	-58.3801	-58.0139
7.95	-64.5142	-65.5517	-65.033	-64.1785					7.95	-57.8308	-57.9529	-58.5632	-57.9224
8	-64.3921	-65.6433	-65.3992	-64.0259					8	-58.0444	-58.0139	-58.5937	-57.8918
8.05	-64.6973	-65.6433	-65.1855	-64.0564					8.05	-57.9529	-58.0444	-58.5632	-58.0139
8.1	-64.5752	-65.6738	-65.1245	-63.9038					8.1	-57.8003	-57.7087	-58.4106	-57.9224
8.15	-64.3921	-65.6433	-65.0635	-64.0564					8.15	-57.7698	-58.0139	-58.5937	-57.8918
8.2	-64.5142	-65.5517	-65.3076	-64.2395					8.2	-58.0749	-57.8918	-58.5632	-58.0444
8.25	-64.6667	-65.4297	-65.2771	-64.3616					8.25	-57.9224	-57.9834	-58.4717	-57.9834
8.3	-64.6667	-65.4297	-65.1855	-64.3616					8.3	-57.8308	-57.6477	-58.4412	-57.7698
8.35	-64.27	-65.4297	-64.9719	-64.1785					8.35	-57.6172	-58.0749	-58.6548	-58.1055
8.4	-64.5752	-65.5517	-65.3381	-64.27					8.4	-58.0444	-57.9834	-58.5022	-58.0444
8.45	-64.6057	-65.7654	-65.3381	-64.1785					8.45	-57.9224	-57.9834	-58.5022	-57.8308
8.5	-64.5752	-65.6433	-65.2771	-64.1174					8.5	-57.8918	-57.7087	-58.5022	-58.1055
8.55	-64.3616	-65.6738	-65.0024	-63.9954					8.55	-57.6172	-58.0749	-58.6548	-58.1055
8.6	-64.6362	-65.5823	-65.2771	-63.9343					8.6	-57.8613	-58.0139	-58.5632	-57.8613
8.65	-64.7278	-65.5212	-65.2771	-64.1785					8.65	-58.0444	-57.9834	-58.5022	-57.9224
8.7	-64.7278	-65.4297	-65.2161	-64.2395					8.7	-57.8613	-57.8003	-58.4717	-58.1665
8.75	-64.331	-65.3686	-65.033	-64.2395					8.75	-57.7698	-58.0749	-58.6853	-58.0444
8.8	-64.6667	-65.3686	-65.1245	-64.27					8.8	-57.7087	-58.1055	-58.5632	-57.8003
8.85	-64.7278	-65.5517	-65.2466	-64.1785					8.85	-57.9224	-58.0749	-58.5632	-58.197
8.9	-64.6362	-65.4907	-65.2466	-64.3616					8.9	-57.8308	-57.8613	-58.4717	-58.1055
8.95	-64.3616	-65.5823	-65.0635	-64.331					8.95	-57.7698	-58.0444	-58.5937	-58.0749
9	-64.5142	-65.4602	-64.8804	-64.0259					9	-57.6782	-58.1055	-58.6243	-57.8613
9.05	-64.6057	-65.4602	-65.2161	-64.0259					9.05	-57.6782	-58.1055	-58.5937	-58.1665
9.1	-64.5752	-65.3686	-65.2771	-64.1174					9.1	-57.8918	-57.8918	-58.4106	-58.0749
9.15	-64.331	-65.2466	-65.155	-64.3005					9.15	-57.8003	-57.9224	-58.5327	-57.9834
9.2	-64.3921	-65.5517	-64.8498	-64.3616					9.2	-57.8003	-58.1055	-58.6548	-57.9529
9.25	-64.5447	-65.5517	-64.9414	-64.2395					9.25	-57.4951	-58.0139	-58.5327	-58.1665
9.3	-64.4836	-65.4297	-65.155	-64.2395					9.3	-57.6477	-57.9834	-58.4717	-58.136
9.35	-64.3005	-65.1855	-65.0024	-63.9954					9.35	-57.8613	-57.8613	-58.3496	-57.8003
9.4	-64.1479	-65.2466	-64.9109	-64.1479					9.4	-57.7698	-58.0444	-58.6548	-57.9834
9.45	-64.4531	-65.5212	-64.7583	-64.3616					9.45	-57.6782	-58.1055	-58.5632	-58.197
9.5	-64.331	-65.3076	-64.9414	-64.3005					9.5	-57.5561	-57.9834	-58.5022	-58.0444
9.55	-64.27	-65.0635	-65.094	-64.0564					9.55	-57.6782	-57.9224	-58.3496	-57.9224
9.6	-63.9954	-65.4297	-65.033	-64.209					9.6	-57.8918	-57.8308	-58.5022	-58.0749
9.65	-64.1785	-65.3686	-64.9109	-64.27					9.65	-57.7087	-58.1055	-58.6243	-58.136
9.7	-64.27	-65.1855	-64.6362	-64.27					9.7	-57.7087	-57.9834	-58.5632	-58.1055
9.75	-64.2395	-65.3076	-64.9719	-64.1785					9.75	-57.4341	-57.9529	-58.4106	-57.8918
9.8	-64.0259	-65.4602	-65.1245	-64.3921					9.8	-57.6172	-57.7087	-58.3191	-58.0139
9.85	-63.9954	-65.1245	-64.8498	-64.2395					9.85	-57.7698	-57.9224	-58.5327	-58.197
9.9	-64.1785	-65.3686	-64.9719	-64.0564					9.9	-57.7698	-58.0139	-58.6548	-58.0749
9.95	-64.209	-65.3076	-64.7278	-64.3921					9.95	-57.7087	-57.9529	-58.5022	-57.9224
10	-64.1479	-65.155	-64.8498	-64.209					10	-57.6477	-57.8918	-58.4106	-58.0139
10.05	-63.8733	-65.3686	-65.0024	-64.0869					10.05	-57.4341	-57.7698	-58.197	-58.1665
10.1	-63.9954	-65.2161	-64.8498	-64.1785					10.1	-57.7087	-57.7698	-58.5937	-58.1665
10.15	-64.331	-65.155	-64.9109	-64.0259					10.15	-57.8003	-57.9834	-58.5022	-57.9834
10.2	-64.1785	-65.1855	-64.7583	-64.1785					10.2	-57.7393	-57.8613	-58.5022	-57.8918
10.25	-64.0869	-65.0024	-64.6667	-64.1174					10.25	-57.7087	-57.9834	-58.3496	-58.2581
10.3	-63.7817	-65.2466	-64.9109	-63.9343					10.3	-57.5561	-57.6782	-58.3191	-58.1055
10.35	-63.9343	-65.2466	-64.9719	-64.209					10.35	-57.4951	-57.7698	-58.4106	-58.0139
10.4	-64.1785	-64.9109	-65.0024	-64.27					10.4	-57.7698	-57.8918	-58.4412	-57.8918
10.45	-64.0564	-65.2161	-64.9414	-63.8733					10.45	-57.7698	-57.9529	-58.4412	-58.1665
10.5	-63.9954	-65.0635	-64.7278	-64.2395					10.5	-57.7393	-57.8613	-58.4412	-58.136
10.55	-63.7207	-64.8804	-64.8193	-64.1174					10.55	-57.7087	-57.8308	-58.197	-58.0749
10.6	-63.9648	-65.155	-65.1245	-63.8123					10.6	-57.6782	-57.5256	-58.3496	-57.8308
10.65	-64.0869	-64.9719	-65.1245	-64.27					10.65	-57.4951	-57.8003	-58.4412	-57.9529
10.7	-63.9954	-65.0024	-64.8804	-64.0564					10.7	-57.6782	-57.9529	-58.4106	-58.136
10.75	-63.8733	-64.9109	-64.7888	-63.7817					10.75	-57.8308	-57.7393	-58.4106	-58.0444
10.8	-63.8123	-64.8193	-64.6057	-64.0869					10.8	-57.7698	-57.8003	-58.2581	-57.8918
10.85	-63.6902	-64.7583	-64.6973	-63.9343					10.85	-57.7393	-57.7087	-58.0749	-57.7698
10.9	-63.8733	-64.8498	-64.9414	-63.6902					10.9	-57.7087	-57.6172	-58.3191	-58.1665
10.95	-63.8428	-64.7583	-64.8193	-64.0564					10.95	-57.6172	-57.8308	-58.3496	-58.0444
11	-63.7817	-64.6973	-64.7278	-63.9648					11	-57.5867	-57.8613	-58.2886	-58.0139
11.05	-63.6291	-64.8193	-64.7583	-63.7207					11.05	-57.8003	-57.7698	-58.197	-57.9834
11.1	-63.446	-64.7583	-64.6057	-63.9954					11.1	-57.8308	-57.7698	-58.1665	-57.8003
11.15	-63.6597	-64.6362	-64.6057	-63.9954					11.15	-57.8308	-57.7087	-58.0139	-58.0139
11.2	-63.7817	-64.7888	-64.9109	-63.9038					11.2	-57.8003	-57.6477	-58.2886	-57.9834
11.25	-63.8123	-64.6973	-64.9109	-63.7817					11.25	-57.7698	-57.8918	-58.3191	-58.0444
11.3	-63.7512	-64.4226	-64.9109	-64.1174					11.3	-57.6782	-57.8918	-58.2275	-57.9834
11.35	-63.6291	-64.7888	-64.8193	-63.9343					11.35	-57.6477	-57.7393	-58.3191	-57.7698
11.4	-63.446	-64.6973	-64.7278	-63.6597					11.4	-57.8308	-57.7698	-58.197	-57.9529
11.45	-63.7817	-64.5752	-64.6057	-63.9343					11.45	-57.9529	-57.7393	-57.9529	-57.9834
11.5	-63.8123	-64.4531	-64.6057	-63.9648					11.5	-57.8918	-57.6172	-58.1055	-58.0444
11.55	-63.6902	-64.7583	-64.8498	-63.9343					11.55	-57.8613	-57.6477	-58.3496	-57.8613
11.6	-63.7207	-64.6362	-64.8498	-63.6291					11.6	-57.8003	-57.8613	-58.2886	-57.6477
11.65	-63.5986	-64.3005	-64.8193	-64.0259					11.65	-57.7393	-57.7698	-58.2275	-57.9224
11.7	-63.4766	-64.5447	-64.8804	-63.9954					11.7	-57.6782	-57.7393	-58.2275	-58.0749
11.75	-63.5681	-64.6362	-64.7278	-63.9343					11.75	-57.8003	-57.7393	-58.136	-57.8613
11.8	-63.6597	-64.5447	-64.6362	-63.9343					11.8	-57.9834	-57.6477	-58.0139	-57.8003
11.85	-63.6597	-64.3616	-64.5752	-64.1479					11.85	-58.0444	-57.4646	-58.197	-57.7393
11.9	-63.5986	-64.6667	-64.8804	-64.209					11.9	-58.0139	-57.7087	-58.3496	-57.8003
11.95	-63.6291	-64.6667	-65.0024	-63.9648					11.95	-58.0444	-57.8003	-58.2886	-57.8613
12	-63.5071	-64.5142	-64.8804	-64.0564					12	-57.9834	-57.8003	-58.2581	-57.8613
12.05	-63.385	-64.4531	-64.8193	-64.27					12.05	-57.8918	-57.6782	-58.1665	-57.8613
12.1	-63.6291	-64.6362	-64.9109	-64.3005					12.1	-57.8918	-57.7393	-58.136	-57.8308
12.15	-63.7817	-64.5752	-64.8498	-64.0869					12.15	-57.8613	-57.6477	-58.0444	-57.5256
12.2	-63.5681	-64.3921	-64.6973	-64.3005					12.2	-58.0749	-57.5867	-58.0749	-57.6782
12.25	-63.5376	-64.5447	-64.6057	-64.3921					12.25	-58.136	-57.4951	-58.2275	-57.8613
12.3	-63.5986	-64.6667	-64.7583	-64.4226					12.3	-58.0749	-57.7087	-58.3191	-57.7393
12.35	-63.5376	-64.6057	-64.9719	-64.2395					12.35	-58.136	-57.7698	-58.2581	-57.6782
12.4	-63.324	-64.331	-64.9719	-64.27					12.4	-58.0444	-57.7698	-58.1665	-57.5561
12.45	-63.3545	-64.6057	-64.9109	-64.4531					12.45	-57.9529	-57.6172	-58.2581	-57.4646
12.5	-63.5681	-64.6667	-64.9109	-64.4531					12.5	-58.3191	-57.7087	-58.136	-57.5867
12.55	-63.6597	-64.6362	-64.9719	-64.3921					12.55	-58.2581	-57.6477	-58.0749	-57.7087
12.6	-63.5681	-64.3921	-64.9109	-64.27					12.6	-58.1055	-57.5256	-58.1055	-57.5867
12.65	-63.5071	-64.7583	-64.7278	-64.5447					12.65	-58.0444	-57.4341	-58.2886	-57.5867
12.7	-63.446	-64.7278	-64.7278	-64.4531					12.7	-58.2886	-57.6782	-58.3191	-57.5256
12.75	-63.4766	-64.6057	-64.8804	-64.4531					12.75	-58.2886	-57.7393	-58.3496	-57.2815
12.8	-63.324	-64.3921	-65.0635	-64.209					12.8	-58.1055	-57.6782	-58.197	-57.373
12.85	-63.324	-64.6667	-65.0635	-64.4836					12.85	-58.2275	-57.6172	-58.1665	-57.5561
12.9	-63.4766	-64.6973	-65.0024	-64.4531					12.9	-58.2275	-57.6172	-58.136	-57.6172
12.95	-63.6902	-64.6667	-64.9109	-64.3616					12.95	-58.1665	-57.4646	-58.1055	-57.4646
13	-63.5986	-64.4226	-65.0024	-64.2395					13	-58.3191	-57.6477	-57.9224	-57.4036
13.05	-63.5071	-64.6667	-64.9719	-64.331					13.05	-58.197	-57.5867	-58.0139	-57.4951
13.1	-63.5071	-64.8498	-64.7583	-64.5447					13.1	-58.0444	-57.6172	-58.136	-57.3425
13.15	-63.446	-64.6973	-64.8193	-64.4531					13.15	-58.4412	-57.3425	-58.3191	-57.2815
13.2	-63.3545	-64.5752	-65.1245	-64.3616					13.2	-58.2581	-57.5867	-58.1665	-57.5256
13.25	-63.2324	-64.5447	-64.9719	-64.1785					13.25	-57.9834	-57.6477	-58.1665	-57.7087
13.3	-63.324	-64.8804	-64.9719	-64.4226					13.3	-58.4106	-57.6172	-58.1055	-57.4646
13.35	-63.446	-64.7583	-64.7888	-64.3921					13.35	-58.2275	-57.312	-57.9224	-57.4646
13.4	-63.5986	-64.6973	-64.8498	-64.3921					13.4	-58.1665	-57.5867	-58.1055	-57.4341
13.45	-63.5376	-64.4531	-65.0024	-64.27					13.45	-58.197	-57.5256	-58.2581	-57.4341
13.5	-63.5071	-64.6057	-64.9414	-64.0869					13.5	-58.0139	-57.4036	-58.136	-57.251
13.55	-63.5071	-64.8193	-64.6362	-64.3616					13.55	-58.3801	-57.6172	-57.9834	-57.4646
13.6	-63.5376	-64.7278	-64.7583	-64.3005					13.6	-58.197	-57.5561	-58.0139	-57.5561
13.65	-63.5681	-64.4836	-64.7888	-64.3005					13.65	-58.1055	-57.4036	-58.1665	-57.7087
13.7	-63.4155	-64.5447	-64.7583	-64.1479					13.7	-58.2275	-57.5867	-58.0749	-57.5256
13.75	-63.2324	-64.7278	-64.6973	-64.1174					13.75	-58.136	-57.3425	-57.9529	-57.5256
13.8	-63.385	-64.7583	-64.8804	-64.4226					13.8	-58.3191	-57.6477	-58.1665	-57.5256
13.85	-63.446	-64.7278	-64.7888	-64.4531					13.85	-58.2581	-57.4951	-58.0749	-57.5867
13.9	-63.5681	-64.4836	-64.7278	-64.331					13.9	-57.9834	-57.2815	-57.8613	-57.3425
13.95	-63.6291	-64.6362	-64.7888	-64.1479					13.95	-58.3191	-57.5561	-58.2581	-57.3425
14	-63.5681	-64.7278	-64.6973	-64.1479					14	-58.2886	-57.373	-58.0749	-57.5256
14.05	-63.5986	-64.6667	-64.8498	-64.4531					14.05	-57.8918	-57.4646	-57.8613	-57.7393
14.1	-63.5986	-64.6362	-64.8804	-64.4226					14.1	-58.4106	-57.4646	-58.136	-57.6477
14.15	-63.4766	-64.4226	-64.6057	-64.3616					14.15	-58.2581	-57.1289	-57.9834	-57.6782
14.2	-63.385	-64.5752	-64.8193	-64.209					14.2	-57.9529	-57.5867	-57.9529	-57.6477
14.25	-63.6902	-64.7278	-64.7888	-64.0869					14.25	-58.3191	-57.4036	-58.0749	-57.7698
14.3	-63.8428	-64.6362	-64.5752	-64.331					14.3	-58.3191	-57.2815	-57.8613	-57.6172
14.35	-63.7512	-64.6057	-64.9414	-64.4226					14.35	-58.0139	-57.373	-58.136	-57.5867
14.4	-63.5071	-64.4531	-64.7888	-64.4531					14.4	-58.3496	-57.251	-58.0444	-57.4036
14.45	-63.5986	-64.4531	-64.6362	-64.3921					14.45	-58.2886	-57.4341	-57.7698	-57.6477
14.5	-63.8733	-64.7583	-64.8804	-64.3005					14.5	-58.136	-57.373	-58.0749	-57.7087
14.55	-63.7207	-64.7278	-64.7278	-64.331					14.55	-58.3801	-57.1899	-57.9529	-57.8308
14.6	-63.446	-64.7583	-64.9109	-64.4836					14.6	-58.2581	-57.4646	-57.8613	-57.7393
14.65	-63.6902	-64.4836	-64.8804	-64.5447					14.65	-58.197	-57.3425	-58.0444	-57.8003
14.7	-63.7512	-64.3921	-64.7583	-64.5142					14.7	-58.2275	-57.1594	-57.8308	-57.6782
14.75	-63.5071	-64.7278	-65.0635	-64.4836					14.75	-58.4717	-57.4036	-58.0749	-57.5867
14.8	-63.8123	-64.7888	-64.8498	-64.27					14.8	-58.2886	-57.3425	-57.9834	-57.7698
14.85	-63.7512	-64.6973	-64.6667	-64.3005					14.85	-58.0749	-57.1289	-57.8003	-57.8918
14.9	-63.5681	-64.5752	-64.9414	-64.5752					14.9	-58.5022	-57.373	-58.0749	-57.7698
14.95	-63.9038	-64.331	-64.9414	-64.5447					14.95	-58.4412	-57.251	-57.9834	-57.5867
15	-63.8123	-64.5142	-64.8498	-64.5752					15	-58.2275	-57.1594	-57.7087	-57.7393
15.05	-63.5376	-64.7583	-64.7583	-64.4836					15.05	-58.3496	-57.312	-58.1055	-57.9529
15.1	-63.9343	-64.7583	-64.9109	-64.331					15.1	-58.5022	-57.312	-58.0139	-57.8003
15.15	-63.9038	-64.7278	-64.7888	-64.4531					15.15	-58.4717	-57.2205	-57.8613	-57.5867
15.2	-63.5986	-64.7278	-64.6362	-64.6057					15.2	-58.197	-57.1899	-58.1055	-57.8918
15.25	-63.8733	-64.5752	-64.9414	-64.6362					15.25	-58.5327	-57.373	-58.0444	-57.9224
15.3	-63.7512	-64.6362	-64.9109	-64.5447					15.3	-58.4717	-57.312	-57.8918	-57.5867
15.35	-63.6597	-64.8193	-64.7583	-64.6362					15.35	-58.3801	-56.9763	-58.1665	-57.9224
15.4	-63.8733	-64.8804	-64.8804	-64.5142					15.4	-58.2886	-57.373	-57.9529	-57.9224
15.45	-63.6597	-64.7888	-64.9414	-64.3921					15.45	-58.5632	-57.2815	-57.9834	-57.7087
15.5	-63.7512	-64.7278	-64.8193	-64.3616					15.5	-58.5632	-57.0984	-57.9224	-57.9224
15.55	-63.9038	-64.5142	-64.6667	-64.5447					15.55	-58.3496	-57.0679	-58.197	-57.8613
15.6	-63.7512	-64.6057	-65.0024	-64.5752					15.6	-58.3801	-57.251	-58.136	-57.7393
15.65	-63.8123	-64.8498	-64.8498	-64.4531					15.65	-58.5022	-57.0984	-57.8613	-58.0444
15.7	-63.9038	-64.8498	-64.6667	-64.5447					15.7	-58.4106	-56.9458	-58.136	-57.8308
15.75	-63.7512	-64.7278	-64.6973	-64.331					15.75	-58.2886	-57.1899	-58.1055	-57.9529
15.8	-63.8428	-64.9109	-64.8804	-64.27					15.8	-58.4412	-57.1899	-57.9529	-57.9529
15.85	-63.9343	-64.8193	-64.8804	-64.3005					15.85	-58.4412	-56.9763	-58.0749	-57.7698
15.9	-63.7207	-64.6973	-64.5752	-64.4226					15.9	-58.3496	-57.0374	-58.1665	-58.0444
15.95	-63.7512	-64.7583	-64.7583	-64.5752					15.95	-58.2275	-57.0679	-58.136	-57.9834
16	-63.9038	-65.0635	-65.0024	-64.6057					16	-58.4717	-57.0374	-57.8003	-57.8308
16.05	-63.8123	-65.1245	-64.8498	-64.5142					16.05	-58.4106	-56.8542	-58.2581	-58.136
16.1	-63.5376	-65.094	-64.5752	-64.4531					16.1	-58.3496	-57.0679	-58.0749	-57.8918
16.15	-63.9343	-65.033	-64.8498	-64.3005					16.15	-58.2581	-57.0068	-57.9834	-57.8918
16.2	-63.9343	-64.9109	-65.0024	-64.209					16.2	-58.3801	-56.9458	-57.8308	-57.9834
16.25	-63.7207	-64.8193	-64.9109	-64.3005					16.25	-58.3496	-56.7932	-58.1665	-57.9834
16.3	-63.6902	-64.8804	-64.6362	-64.4531					16.3	-58.2581	-57.0984	-58.1055	-57.9529
16.35	-63.8428	-65.033	-64.9109	-64.5447					16.35	-58.0749	-57.0068	-57.9529	-58.0139
16.4	-63.8428	-65.1855	-65.033	-64.4226					16.4	-58.3191	-56.8848	-57.8918	-57.8613
16.45	-63.5071	-65.1245	-64.9109	-64.4226					16.45	-58.3191	-56.9763	-58.1665	-57.9529
16.5	-63.8428	-65.1245	-64.6667	-64.4531					16.5	-58.2275	-57.0679	-58.0139	-58.0139
16.55	-63.6902	-65.094	-64.7888	-64.3005					16.55	-58.136	-56.9763	-57.8003	-57.9224
16.6	-63.6597	-65.033	-64.9719	-64.3005					16.6	-58.2886	-56.8848	-57.9224	-57.7698
16.65	-63.5376	-64.8498	-64.9109	-64.1174					16.65	-58.3801	-56.8848	-58.0749	-58.1665
16.7	-63.9038	-65.0024	-64.6057	-64.2395					16.7	-58.2886	-57.0374	-58.0749	-57.9529
16.75	-63.7207	-65.094	-64.8498	-64.3616					16.75	-58.0749	-56.9763	-57.8613	-57.7393
16.8	-63.5071	-65.2161	-64.9109	-64.4226					16.8	-58.2275	-56.8848	-58.0444	-57.9834
16.85	-63.6291	-65.1245	-64.9719	-64.4531					16.85	-58.3801	-56.9458	-58.1055	-58.0444
16.9	-63.8123	-65.1245	-64.8193	-64.331					16.9	-58.2581	-57.0068	-58.1055	-57.7698
16.95	-63.7207	-65.0635	-64.7278	-64.3616					16.95	-58.2275	-56.8848	-57.8918	-57.8918
17	-63.5986	-65.094	-65.0024	-64.331					17	-57.9834	-56.8542	-58.0749	-58.0444
17.05	-63.6597	-64.9414	-64.9414	-64.2395					17.05	-58.2581	-56.8848	-58.2275	-58.0444
17.1	-63.9038	-64.7888	-64.8804	-64.1479					17.1	-58.2581	-56.9763	-58.1055	-57.6477
17.15	-63.7207	-64.7278	-64.6362	-64.0259					17.15	-58.2275	-56.8542	-57.8613	-58.1055
17.2	-63.5071	-64.9109	-65.0024	-64.0564					17.2	-58.0139	-56.8848	-58.0139	-57.9224
17.25	-63.6902	-65.0024	-64.9109	-64.209					17.25	-58.197	-56.8542	-58.197	-57.9224
17.3	-63.7817	-65.094	-64.9719	-64.4226					17.3	-58.3191	-57.0679	-58.1665	-57.8003
17.35	-63.7817	-65.094	-64.7583	-64.4836					17.35	-58.2581	-56.8542	-58.0139	-58.0444
17.4	-63.5681	-65.094	-64.8804	-64.3616					17.4	-58.1055	-56.8542	-57.9834	-57.9834
17.45	-63.5376	-64.9109	-65.094	-64.331					17.45	-57.9834	-56.7322	-58.197	-57.8003
17.5	-63.7817	-64.8193	-65.0635	-64.209					17.5	-58.2275	-56.9763	-58.1055	-57.8918
17.55	-63.6597	-64.9414	-64.9414	-64.0259					17.55	-58.4412	-56.9763	-57.9834	-58.0139
17.6	-63.6597	-65.0635	-64.8804	-64.0259					17.6	-58.197	-56.9763	-57.8613	-57.8918
17.65	-63.4766	-65.0024	-65.155	-64.2395					17.65	-58.2275	-56.7627	-58.197	-57.8003
17.7	-63.8123	-64.8498	-65.3381	-64.1785					17.7	-58.0139	-56.7932	-58.1055	-57.9224
17.75	-63.8123	-64.8193	-65.3076	-64.0564					17.75	-58.3801	-56.9763	-58.0749	-58.0139
17.8	-63.6291	-65.033	-65.094	-63.8428					17.8	-58.3801	-56.8848	-57.8003	-57.8918
17.85	-63.3545	-64.9414	-64.9109	-64.1174					17.85	-58.3191	-56.9763	-58.0444	-57.7698
17.9	-63.5986	-64.6973	-65.1245	-64.1174					17.9	-58.2581	-56.6711	-58.197	-57.9529
17.95	-63.7207	-65.033	-65.2771	-64.1785					17.95	-58.136	-56.8848	-57.9834	-58.0139
18	-63.6597	-65.1245	-65.3076	-63.8733					18	-58.2581	-56.9763	-58.0139	-57.9529
18.05	-63.446	-64.7888	-65.1245	-64.209					18.05	-58.4412	-57.0374	-57.8003	-57.8003
18.1	-63.324	-65.094	-65.033	-64.1479					18.1	-58.3801	-56.8237	-58.0749	-57.9834
18.15	-63.5681	-65.0635	-65.3381	-63.9343					18.15	-58.4106	-56.7322	-58.1055	-57.9834
18.2	-63.4766	-64.7583	-65.3686	-64.2395					18.2	-58.136	-57.0068	-58.0444	-57.9529
18.25	-63.4766	-65.1855	-65.2161	-64.1174					18.25	-58.2275	-57.1594	-57.9529	-57.7393
18.3	-63.324	-65.0635	-65.2466	-63.7817					18.3	-58.4717	-56.9763	-57.8918	-57.8918
18.35	-63.4766	-64.8193	-65.033	-64.1785					18.35	-58.3801	-56.7932	-58.0749	-57.9529
18.4	-63.6597	-65.155	-65.3076	-64.1174					18.4	-58.3801	-56.8542	-58.0444	-57.8918
18.45	-63.446	-64.9719	-65.3992	-63.8428					18.45	-58.3191	-57.1289	-58.0749	-57.7393
18.5	-63.385	-65.0635	-65.1855	-64.1479					18.5	-58.2886	-57.0374	-57.9224	-57.8003
18.55	-63.1714	-65.1855	-65.2161	-63.9954					18.55	-58.5022	-57.0068	-57.7393	-57.9529
18.6	-63.4155	-64.8804	-65.094	-63.9648					18.6	-58.5632	-56.8848	-58.0139	-57.7698
18.65	-63.5071	-65.3381	-65.094	-64.209					18.65	-58.4717	-56.8848	-58.136	-57.8003
18.7	-63.3545	-65.2771	-65.3381	-64.0259					18.7	-58.5022	-57.0068	-58.0139	-57.6477
18.75	-63.3545	-64.9719	-65.2161	-64.0869					18.75	-58.4106	-57.1289	-57.8613	-57.8918
18.8	-63.2019	-65.2466	-65.2466	-64.1785					18.8	-58.2275	-57.0679	-57.7698	-57.7393
18.85	-63.2935	-65.1245	-65.1855	-64.0564					18.85	-58.5022	-57.0068	-57.8918	-57.7393
18.9	-63.5376	-65.094	-65.033	-64.1785					18.9	-58.6243	-56.8237	-58.1665	-57.5256
18.95	-63.4766	-65.1855	-65.033	-64.209					18.95	-58.5022	-57.0679	-57.9529	-57.8613
19	-63.5071	-65.033	-65.2771	-64.0259					19	-58.5022	-57.1594	-57.9224	-57.7698
19.05	-63.2629	-65.1245	-65.2771	-64.27					19.05	-58.3801	-57.1899	-57.8613	-57.7698
19.1	-63.324	-65.155	-65.155	-64.27					19.1	-58.2886	-57.0679	-57.9224	-57.6172
19.15	-63.5986	-65.094	-65.0635	-63.9038					19.15	-58.4106	-56.9458	-57.9834	-57.5867
19.2	-63.5986	-65.1245	-64.9414	-64.2395					19.2	-58.5632	-56.9763	-58.0139	-57.7698
19.25	-63.5986	-65.1245	-64.9414	-64.209					19.25	-58.4106	-57.2205	-57.9834	-57.7698
19.3	-63.385	-65.1245	-65.155	-64.1174					19.3	-58.4412	-57.1899	-57.9834	-57.7087
19.35	-63.385	-65.0635	-65.1855	-64.1785					19.35	-58.4106	-57.1289	-57.7698	-57.5256
19.4	-63.5986	-65.1855	-65.094	-64.209					19.4	-58.3496	-57.0984	-57.8613	-57.5256
19.45	-63.6902	-65.1245	-65.155	-64.2395					19.45	-58.197	-57.1289	-58.136	-57.8308
19.5	-63.6597	-64.9414	-65.033	-64.0869					19.5	-58.4717	-56.8848	-58.136	-57.7087
19.55	-63.5681	-65.2466	-64.8193	-64.3005					19.55	-58.5022	-57.1899	-58.0444	-57.6477
19.6	-63.446	-65.1245	-64.9719	-64.209					19.6	-58.4412	-57.312	-57.9224	-57.4341
19.65	-63.6902	-64.8498	-65.2161	-64.0259					19.65	-58.4106	-57.251	-57.8003	-57.6172
19.7	-63.8123	-65.1245	-65.2466	-64.1785					19.7	-58.4717	-57.1594	-58.0139	-57.8308
19.75	-63.8733	-65.0635	-65.0024	-64.209					19.75	-58.2581	-57.0984	-58.0444	-57.7698
19.8	-63.8428	-65.033	-64.9414	-64.1174					19.8	-58.0749	-57.0068	-58.0749	-57.7393
19.85	-63.8123	-64.8498	-64.9414	-63.8123					19.85	-58.197	-57.2205	-58.0139	-57.6477
19.9	-63.6902	-65.1245	-64.7278	-64.27					19.9	-58.4717	-57.3425	-58.0444	-57.5561
19.95	-63.6597	-65.1245	-64.8804	-64.1785					19.95	-58.4717	-57.2205	-57.8918	-57.7698
20	-63.9038	-64.7278	-65.0635	-64.0869					20	-58.2886	-57.2815	-57.8003	-57.8003
20.05	-63.9954	-65.0024	-64.9719	-64.0259					20.05	-58.2886	-57.2815	-58.136	-57.8003
20.1	-63.9038	-65.033	-65.033	-64.331					20.1	-58.3191	-57.0984	-58.2581	-57.6477
20.15	-63.9343	-64.9414	-65.094	-64.209					20.15	-58.197	-56.9458	-58.1055	-57.5867
20.2	-63.9038	-64.8498	-64.9414	-63.8428					20.2	-57.9834	-57.251	-58.1055	-57.7393
20.25	-63.7207	-65.0635	-64.8804	-64.1479					20.25	-58.0749	-57.373	-58.1055	-57.8918
20.3	-63.9648	-64.9414	-64.8193	-64.1785					20.3	-58.3191	-57.251	-57.9834	-57.7393
20.35	-64.1174	-64.8498	-65.0024	-64.209					20.35	-58.2886	-57.251	-57.8308	-57.7698
20.4	-64.1174	-64.8498	-65.1245	-63.9954					20.4	-58.2886	-57.2815	-58.0749	-57.5867
20.45	-64.1785	-65.0024	-65.1245	-64.0259					20.45	-58.136	-57.1594	-58.2581	-57.4951
20.5	-64.1479	-64.9109	-65.094	-64.209					20.5	-58.2581	-57.0374	-58.2275	-57.8003
20.55	-64.0564	-64.6362	-65.0024	-64.1785					20.55	-58.0139	-57.251	-58.0749	-57.8003
20.6	-63.9038	-64.7888	-65.0024	-63.8733					20.6	-57.9224	-57.4036	-58.0444	-57.6782
20.65	-64.0564	-64.9719	-64.9109	-64.0564					20.65	-58.0444	-57.4646	-58.1055	-57.7087
20.7	-64.209	-64.9109	-64.7583	-64.27					20.7	-58.2886	-57.312	-58.0139	-57.6172
20.75	-64.27	-64.6667	-64.8498	-64.3005					20.75	-58.0749	-57.3425	-57.9529	-57.6172
20.8	-64.2395	-64.9719	-64.9109	-64.0259					20.8	-58.0444	-57.4341	-58.1055	-57.7087
20.85	-64.209	-65.033	-65.1245	-63.9954					20.85	-57.8003	-57.312	-58.2581	-57.8613
20.9	-64.1174	-64.9109	-65.1245	-64.3005					20.9	-58.136	-57.1594	-58.2581	-57.6782
20.95	-64.0259	-64.7278	-65.1855	-64.2395					20.95	-58.1055	-57.2205	-58.0444	-57.6782
21	-64.0564	-64.9414	-65.094	-64.209					21	-58.0139	-57.4341	-58.1055	-57.5256
21.05	-64.209	-65.094	-65.094	-63.9954					21.05	-57.7393	-57.5561	-58.1055	-57.4646
21.1	-64.4226	-64.9414	-65.0635	-64.209					21.1	-58.1055	-57.4341	-57.9834	-57.6172
21.15	-64.4836	-64.7278	-65.033	-64.1785					21.15	-57.9529	-57.4036	-57.8613	-57.7698
21.2	-64.4226	-64.8193	-64.7888	-64.0869					21.2	-57.7698	-57.3425	-58.0139	-57.6477
21.25	-64.3616	-65.094	-65.033	-63.8428					21.25	-58.0444	-57.251	-58.2275	-57.6172
21.3	-64.27	-65.0024	-65.033	-64.0869					21.3	-58.0139	-57.312	-58.2581	-57.6172
21.35	-64.1785	-64.8193	-65.1855	-64.1785					21.35	-57.7393	-57.4341	-58.136	-57.5256
21.4	-64.1479	-64.8193	-65.2161	-64.209					21.4	-57.9834	-57.4646	-58.0444	-57.4646
21.45	-64.4226	-65.1245	-65.2161	-64.0564					21.45	-57.9224	-57.312	-58.197	-57.6172
21.5	-64.4531	-65.033	-65.155	-63.9648					21.5	-57.7698	-57.312	-58.0749	-57.8003
21.55	-64.4836	-64.9109	-64.9719	-64.1785					21.55	-57.9834	-57.4951	-57.8613	-57.7087
21.6	-64.5142	-64.8498	-65.2161	-64.2395					21.6	-57.8003	-57.4341	-58.0139	-57.6477
21.65	-64.4226	-65.1855	-65.3992	-64.1785					21.65	-57.7698	-57.2205	-58.2886	-57.6172
21.7	-64.5447	-65.2466	-65.1855	-63.8733					21.7	-57.9834	-57.5561	-58.197	-57.6782
21.75	-64.3921	-65.1245	-65.1855	-64.0869					21.75	-57.7087	-57.4036	-58.0749	-57.4646
21.8	-64.5142	-64.9109	-65.155	-64.27					21.8	-58.0139	-57.1899	-57.9224	-57.6172
21.85	-64.3616	-64.9719	-65.3992	-64.209					21.85	-57.8613	-57.5256	-58.1055	-57.7698
21.9	-64.331	-65.2466	-65.3686	-64.0259					21.9	-57.8003	-57.4951	-58.197	-57.8308
21.95	-64.4531	-65.1245	-65.0635	-63.8123					21.95	-57.8613	-57.1289	-58.0139	-57.7698
22	-64.6057	-65.0635	-65.3381	-64.0869					22	-57.7698	-57.6477	-57.8918	-57.8003
22.05	-64.6057	-64.8498	-65.3381	-64.27					22.05	-57.8918	-57.4646	-58.0749	-57.8003
22.1	-64.5447	-65.2771	-65.1245	-64.1174					22.1	-57.9224	-57.4036	-58.0749	-57.7393
22.15	-64.4226	-65.3076	-65.3992	-63.9954					22.15	-57.5867	-57.5256	-57.8918	-57.5561
22.2	-64.4531	-65.1855	-65.3686	-63.8428					22.2	-57.8918	-57.312	-57.9834	-57.7087
22.25	-64.4226	-65.0635	-65.2161	-64.1174					22.25	-57.8613	-57.5867	-58.1055	-57.8613
22.3	-64.3005	-65.094	-65.4907	-64.27					22.3	-57.7087	-57.5256	-57.8918	-58.0749
22.35	-64.209	-65.2771	-65.3686	-64.1174					22.35	-57.9529	-57.3425	-57.9529	-57.9529
22.4	-64.1785	-65.2161	-65.155	-64.0564					22.4	-57.8308	-57.7393	-57.9834	-57.8308
22.45	-64.5142	-65.2161	-65.5517	-63.8733					22.45	-57.6477	-57.4951	-57.8308	-57.9529
22.5	-64.5752	-65.1245	-65.4297	-64.0564					22.5	-58.0444	-57.5561	-58.0749	-57.8918
22.55	-64.3616	-64.9719	-65.3076	-64.1785					22.55	-57.8308	-57.5867	-58.0139	-57.8308
22.6	-64.3005	-65.2771	-65.5212	-64.0564					22.6	-57.5867	-57.4036	-57.7698	-57.7393
22.65	-64.2395	-65.1855	-65.3076	-64.0564					22.65	-57.8918	-57.8003	-58.197	-57.7087
22.7	-64.3921	-65.2771	-65.4297	-63.9954					22.7	-57.8003	-57.5867	-57.9224	-57.9224
22.75	-64.4836	-65.2161	-65.5212	-63.8733					22.75	-57.5256	-57.5256	-57.9224	-58.0139
22.8	-64.4226	-65.033	-65.2771	-64.1785					22.8	-57.8308	-57.7393	-57.9834	-58.0139
22.85	-64.1174	-65.2161	-65.6128	-64.1479					22.85	-57.8003	-57.6172	-57.8308	-58.0139
22.9	-64.27	-65.3381	-65.7043	-64.1479					22.9	-57.5867	-57.6477	-58.1055	-58.136
22.95	-64.4226	-65.3381	-65.3686	-64.1785					22.95	-57.8308	-57.8003	-57.9529	-57.9529
23	-64.2395	-65.3686	-65.6128	-63.9038					23	-57.8308	-57.7087	-57.7393	-57.8918
23.05	-64.0869	-65.033	-65.6128	-64.0259					23.05	-57.7087	-57.7393	-58.1055	-57.8613
23.1	-64.4226	-65.1855	-65.5212	-64.27					23.1	-57.6477	-57.8003	-57.9529	-58.1665
23.15	-64.3005	-65.3992	-65.8874	-64.27					23.15	-57.9834	-57.7698	-57.8003	-58.0749
23.2	-63.9648	-65.3381	-65.7349	-64.1785					23.2	-57.8003	-57.8613	-58.0749	-58.1055
23.25	-64.331	-65.3076	-65.3381	-64.0869					23.25	-57.4951	-57.9224	-57.9834	-57.8613
23.3	-64.3005	-65.155	-65.7959	-63.9343					23.3	-57.8918	-57.8613	-57.8613	-58.197
23.35	-64.1174	-65.0024	-65.7654	-63.9343					23.35	-57.8003	-57.7698	-58.0749	-58.136
23.4	-64.3921	-65.2161	-65.4907	-64.209					23.4	-57.6782	-58.0749	-57.9224	-58.136
23.45	-64.0869	-65.3381	-65.6738	-64.27					23.45	-57.6172	-57.9224	-57.9224	-57.9529
23.5	-64.0564	-65.3076	-65.7043	-64.1785					23.5	-57.8613	-57.8003	-58.0749	-58.3191
23.55	-64.209	-65.3381	-65.6128	-64.27					23.55	-57.8613	-58.0749	-57.9834	-58.2275
23.6	-64.0564	-65.2161	-65.5212	-64.1174					23.6	-57.5867	-58.1055	-57.8003	-58.0139
23.65	-64.0869	-65.0635	-65.7654	-63.9648					23.65	-57.8003	-57.8308	-58.1665	-58.2581
23.7	-64.1479	-65.1245	-65.7043	-64.1174					23.7	-57.7698	-58.1055	-58.0749	-58.2581
23.75	-63.8428	-65.3076	-65.4602	-64.331					23.75	-57.8003	-58.0139	-57.8003	-57.9834
23.8	-64.0564	-65.3381	-65.7654	-64.27					23.8	-57.5256	-58.0444	-58.0749	-58.3496
23.85	-64.1174	-65.2161	-65.7043	-64.1785					23.85	-57.8613	-57.8918	-58.0749	-58.2275
23.9	-63.7817	-65.094	-65.5823	-64.0564					23.9	-57.7698	-58.2581	-57.9224	-58.0749
23.95	-64.1174	-64.8498	-65.4602	-63.9954					23.95	-57.7087	-58.1055	-57.8918	-58.2581
24	-64.0869	-64.9414	-65.7043	-63.8733					24	-57.5867	-58.0139	-58.0444	-58.197
24.05	-63.6902	-65.094	-65.6738	-64.1174					24.05	-57.8613	-58.197	-58.136	-58.2886
24.1	-64.1174	-65.1245	-65.3381	-64.209					24.1	-57.7698	-58.2275	-57.8003	-58.3191
24.15	-64.0259	-65.0635	-65.4602	-64.209					24.15	-57.6477	-58.1055	-58.1055	-58.0444
24.2	-63.7207	-64.9719	-65.6128	-64.2395					24.2	-57.6782	-57.9834	-58.0444	-58.4106
24.25	-63.9954	-65.0024	-65.5212	-64.1174					24.25	-57.8308	-58.2886	-57.9834	-58.2275
24.3	-63.8123	-64.7888	-65.2771	-64.1174					24.3	-57.7393	-58.2581	-57.9224	-58.136
24.35	-63.7817	-64.8498	-65.4907	-63.9954					24.35	-57.6172	-58.1055	-58.1665	-58.3801
24.4	-63.8733	-65.033	-65.5517	-64.0259					24.4	-57.6477	-58.197	-58.0444	-58.2581
24.45	-63.9954	-65.1245	-65.4602	-64.209					24.45	-57.8003	-58.2581	-57.9834	-58.2275
24.5	-63.9038	-65.0635	-65.1855	-64.2395					24.5	-57.7698	-58.2581	-58.0749	-58.4412
24.55	-63.6291	-65.0635	-65.5517	-64.27					24.55	-57.4951	-57.9834	-58.197	-58.2275
24.6	-64.1479	-64.9414	-65.4297	-64.1479					24.6	-57.6782	-58.2581	-58.0749	-58.3191
24.65	-63.9648	-64.8498	-65.3381	-64.1785					24.65	-57.8003	-58.2275	-57.8918	-58.3801
24.7	-63.8123	-64.8193	-65.155	-64.1785					24.7	-57.7698	-58.1055	-58.1665	-58.2886
24.75	-63.8428	-64.9719	-65.3381	-63.9343					24.75	-57.6172	-57.9529	-58.197	-58.197
24.8	-64.0564	-65.155	-65.3992	-63.9038					24.8	-57.6172	-58.2886	-58.0444	-58.4412
24.85	-63.9648	-65.1855	-65.3076	-64.0869					24.85	-57.8918	-58.197	-58.0139	-58.2886
24.9	-63.7512	-65.1855	-64.9719	-64.209					24.9	-57.8003	-58.136	-58.2581	-58.3191
24.95	-63.9343	-65.2161	-65.3076	-64.2395					24.95	-57.6477	-57.9224	-58.136	-58.5022
25	-63.9648	-65.0635	-65.2771	-64.3005					25	-57.5256	-58.3496	-58.0749	-58.3801
25.05	-63.8733	-65.0024	-65.3992	-64.2395					25.05	-57.8308	-58.1665	-58.0444	-58.1665
25.1	-63.5376	-64.9414	-65.033	-64.3616					25.1	-57.7698	-58.1055	-58.2581	-58.5327
25.15	-63.9038	-65.155	-65.2161	-64.209					25.15	-57.7393	-57.9529	-58.1665	-58.4717
25.2	-63.8123	-65.1855	-65.2771	-64.0869					25.2	-57.4951	-58.2886	-58.0444	-58.3496
25.25	-63.8428	-65.3076	-65.2466	-64.0869					25.25	-57.7698	-58.0749	-57.9529	-58.4717
25.3	-63.5986	-65.2771	-65.0024	-64.0869					25.3	-57.8308	-58.136	-58.3496	-58.5022
25.35	-63.8428	-65.1855	-65.0024	-64.209					25.35	-57.7698	-57.9224	-58.1665	-58.3801
25.4	-63.8123	-65.1855	-65.094	-64.3005					25.4	-57.5561	-58.2275	-58.197	-58.2886
25.45	-63.8123	-65.155	-65.0024	-64.331					25.45	-57.5867	-58.136	-57.9529	-58.6243
25.5	-63.5376	-65.0635	-64.9414	-64.3921					25.5	-57.8308	-58.1055	-58.3191	-58.5022
25.55	-63.8733	-65.0635	-64.7583	-64.3005					25.55	-57.7698	-57.9529	-58.2886	-58.3191
25.6	-63.7512	-65.1245	-65.0024	-64.331					25.6	-57.7393	-58.1665	-58.197	-58.4412
25.65	-63.7207	-65.1855	-65.0024	-64.3005					25.65	-57.4341	-58.1665	-58.0444	-58.6243
25.7	-63.446	-65.2466	-64.9719	-64.3616					25.7	-57.6477	-58.197	-58.3191	-58.4717
25.75	-63.6902	-65.2466	-64.6667	-64.2395					25.75	-57.8613	-58.0444	-58.3191	-58.2581
25.8	-63.6597	-65.3381	-64.7888	-64.1785					25.8	-57.6172	-58.1055	-58.3191	-58.5632
25.85	-63.5681	-65.1245	-64.9414	-64.4531					25.85	-57.6172	-58.3496	-58.136	-58.6243
25.9	-63.4155	-65.0024	-64.8804	-64.6057					25.9	-57.4646	-58.136	-58.1665	-58.5632
25.95	-63.5376	-65.2771	-64.8193	-64.5142					25.95	-57.7393	-58.0444	-58.3496	-58.3496
26	-63.7207	-65.094	-64.6057	-64.3921					26	-57.7087	-57.9529	-58.2581	-58.6548
26.05	-63.5986	-65.1245	-64.7278	-64.3005					26.05	-57.6782	-58.2275	-58.1665	-58.5937
26.1	-63.4766	-64.8804	-64.7583	-64.5142					26.1	-57.5867	-58.2581	-58.1055	-58.4717
26.15	-63.446	-65.155	-64.7278	-64.6362					26.15	-57.4341	-58.0749	-58.2275	-58.4412
26.2	-63.5681	-65.2161	-64.6057	-64.5447					26.2	-57.6172	-58.0139	-58.2581	-58.6548
26.25	-63.446	-64.9109	-64.4226	-64.27					26.25	-57.6782	-58.1055	-58.2581	-58.6853
26.3	-63.4766	-65.0024	-64.6057	-64.6057					26.3	-57.5561	-58.2581	-58.1055	-58.5632
26.35	-63.2629	-65.0635	-64.7278	-64.6667					26.35	-57.5867	-58.136	-58.0749	-58.3801
26.4	-63.446	-65.033	-64.6057	-64.5752					26.4	-57.4036	-58.1665	-58.3496	-58.7463
26.45	-63.5376	-65.033	-64.5142	-64.5752					26.45	-57.5256	-57.8308	-58.3191	-58.6243
26.5	-63.446	-64.9414	-64.27	-64.6057					26.5	-57.7087	-58.0749	-58.2886	-58.5022
26.55	-63.4155	-64.6667	-64.5142	-64.4836					26.55	-57.6477	-58.136	-58.1055	-58.4412
26.6	-63.2019	-65.033	-64.6057	-64.5142					26.6	-57.5561	-58.0444	-58.2581	-58.7158
26.65	-63.5071	-65.0024	-64.4531	-64.5752					26.65	-57.4341	-57.9834	-58.4412	-58.7463
26.7	-63.5071	-64.6057	-64.331	-64.3921					26.7	-57.4341	-57.8308	-58.2886	-58.5937
26.75	-63.5071	-65.033	-64.1785	-64.5447					26.75	-57.6782	-57.9834	-58.2581	-58.3496
26.8	-63.3545	-64.7888	-64.1785	-64.4836					26.8	-57.7087	-58.0749	-58.197	-58.7769
26.85	-63.2935	-64.7583	-64.331	-64.2395					26.85	-57.5561	-58.0139	-58.136	-58.7463
26.9	-63.5071	-64.8804	-64.3616	-64.5752					26.9	-57.6172	-57.9834	-58.3801	-58.5937
26.95	-63.5681	-64.7278	-64.209	-64.4836					26.95	-57.4036	-57.7698	-58.2275	-58.4106
27	-63.5376	-64.9109	-64.1479	-64.3005					27	-57.4036	-57.8918	-58.3191	-58.6548
27.05	-63.324	-65.0024	-63.8733	-64.6057					27.05	-57.7393	-58.1055	-58.136	-58.7769
27.1	-63.3545	-64.6667	-64.1785	-64.4836					27.1	-57.6782	-57.9834	-58.1055	-58.6548
27.15	-63.5681	-65.0024	-64.3005	-64.331					27.15	-57.6782	-57.8613	-58.2581	-58.5327
27.2	-63.5681	-64.9414	-64.2395	-64.6057					27.2	-57.5561	-57.8003	-58.2275	-58.5632
27.25	-63.5986	-64.6362	-64.1479	-64.3921					27.25	-57.4951	-57.8003	-58.197	-58.8074
27.3	-63.446	-65.0024	-63.9954	-64.3921					27.3	-57.5256	-57.9529	-58.197	-58.6853
27.35	-63.324	-64.8804	-63.8733	-64.331					27.35	-57.6477	-57.9834	-57.8613	-58.6853
27.4	-63.6902	-64.7583	-64.1785	-64.2395					27.4	-57.7698	-57.8918	-58.197	-58.4717
27.45	-63.7817	-65.0024	-64.2395	-64.3005					27.45	-57.7393	-57.8918	-58.2581	-58.6548
27.5	-63.6597	-64.8193	-64.1479	-64.4226					27.5	-57.7087	-57.6782	-58.197	-58.7463
27.55	-63.5681	-64.7278	-64.0869	-64.27					27.55	-57.6477	-57.7087	-58.1055	-58.6548
27.6	-63.324	-65.0024	-64.0259	-64.1785					27.6	-57.4341	-58.0139	-58.0139	-58.5937
27.65	-63.6291	-64.9414	-63.8733	-64.4836					27.65	-57.6172	-57.9834	-57.9224	-58.5632
27.7	-63.7207	-64.7888	-64.1479	-64.3921					27.7	-57.8308	-57.8918	-58.2275	-58.7769
27.75	-63.6291	-65.2161	-64.27	-64.1174					27.75	-57.8613	-57.8308	-58.136	-58.6853
27.8	-63.6597	-64.9719	-64.209	-64.4226					27.8	-57.7087	-57.7698	-58.0139	-58.6853
27.85	-63.5071	-64.7583	-64.3005	-64.3921					27.85	-57.8003	-57.7698	-58.1055	-58.5632
27.9	-63.4155	-65.1245	-64.1479	-64.1785					27.9	-57.6782	-57.9224	-58.0139	-58.4412
27.95	-63.7207	-65.094	-63.9343	-64.27					27.95	-57.5256	-57.9529	-57.8918	-58.6548
28	-63.8123	-64.9414	-64.0564	-64.331					28	-57.6477	-57.8308	-58.0749	-58.7158
28.05	-63.8123	-65.0024	-64.3005	-64.2395					28.05	-57.8918	-57.8613	-58.197	-58.7158
28.1	-63.7817	-65.0635	-64.4531	-64.0259					28.1	-57.9529	-57.7087	-58.1665	-58.5327
28.15	-63.6597	-65.033	-64.3005	-64.3616					28.15	-57.8613	-57.5561	-58.1055	-58.4106
28.2	-63.5986	-64.9414	-64.3005	-64.331					28.2	-57.8308	-57.8308	-57.9834	-58.6853
28.25	-63.8733	-65.155	-64.1785	-64.0869					28.25	-57.8308	-57.9529	-57.8918	-58.6853
28.3	-63.9954	-65.094	-64.1174	-64.1174					28.3	-57.8308	-57.8613	-57.8918	-58.5327
28.35	-63.8733	-65.0635	-64.1174	-64.3921					28.35	-57.6172	-57.8003	-58.0749	-58.4717
28.4	-63.9038	-65.1245	-64.3616	-64.331					28.4	-57.8613	-57.8003	-58.197	-58.3801
28.45	-63.7512	-65.3076	-64.5447	-63.9954					28.45	-58.0139	-57.7087	-58.1055	-58.5327
28.5	-63.6597	-65.2161	-64.5447	-64.2395					28.5	-58.1055	-57.5256	-58.197	-58.5937
28.55	-63.8428	-65.0635	-64.5447	-64.4531					28.55	-57.9834	-57.7087	-57.9224	-58.5327
28.6	-63.9954	-65.3992	-64.4531	-64.27					28.6	-57.9834	-57.8003	-57.8613	-58.5327
28.65	-63.9343	-65.3076	-64.3921	-63.9648					28.65	-58.0139	-57.8918	-57.9529	-58.4106
28.7	-63.9648	-65.2771	-64.331	-64.27					28.7	-57.9834	-57.7698	-58.197	-58.2581
28.75	-63.9954	-65.033	-64.4531	-64.27					28.75	-57.8613	-57.7087	-58.1665	-58.5022
28.8	-63.8733	-65.3686	-64.5752	-64.2395					28.8	-57.9224	-57.6172	-58.1055	-58.5632
28.85	-63.7817	-65.3381	-64.6973	-63.8733					28.85	-58.1665	-57.5561	-58.136	-58.4717
28.9	-63.9648	-65.2466	-64.7583	-64.1479					28.9	-58.2581	-57.6477	-58.1055	-58.3801
28.95	-64.209	-65.1855	-64.6667	-64.27					28.95	-58.136	-57.8003	-57.9529	-58.2581
29	-64.1479	-65.4907	-64.7583	-64.1479					29	-58.1055	-57.8613	-57.9224	-58.2275
29.05	-64.0259	-65.3686	-64.6667	-63.8123					29.05	-58.0749	-57.8003	-58.0444	-58.5022
29.1	-64.1174	-65.2771	-64.5447	-64.0869					29.1	-58.0444	-57.7393	-58.2581	-58.3801
29.15	-63.9343	-65.2466	-64.6667	-64.1785					29.15	-58.2275	-57.7087	-58.2581	-58.3191
29.2	-63.8733	-65.6738	-64.6973	-64.1479					29.2	-58.1665	-57.6172	-58.2275	-58.3496
29.25	-63.9038	-65.6433	-64.9109	-63.7207					29.25	-58.2275	-57.5256	-58.197	-58.2886
29.3	-64.0869	-65.3381	-65.094	-63.8733					29.3	-58.0444	-57.5256	-58.2275	-58.136
29.35	-64.2395	-65.3381	-65.033	-64.0564					29.35	-58.3191	-57.7698	-58.1055	-58.2581
29.4	-64.1479	-65.6128	-65.1245	-63.9648					29.4	-58.2581	-57.8308	-58.0139	-58.4106
29.45	-64.0259	-65.4297	-65.0635	-63.8123					29.45	-58.197	-57.8003	-58.1055	-58.3496
29.5	-64.0869	-65.4907	-65.0024	-63.6291					29.5	-58.3496	-57.7087	-58.2581	-58.2275
29.55	-64.0564	-65.3381	-64.9719	-63.8733					29.55	-58.2275	-57.7393	-58.2886	-58.2275
29.6	-63.9954	-65.6128	-64.9109	-63.8123					29.6	-58.136	-57.4646	-58.4412	-58.0444
29.65	-63.9038	-65.5823	-64.9109	-63.7207					29.65	-58.3496	-57.7393	-58.3191	-58.136
29.7	-63.9954	-65.5212	-65.1855	-63.4766					29.7	-58.4106	-57.8308	-58.3801	-58.136
29.75	-64.1479	-65.3686	-65.2771	-63.7512					29.75	-58.1665	-57.7698	-58.3191	-58.2581
29.8	-64.209	-65.7043	-65.3381	-63.8428					29.8	-58.3801	-57.6477	-58.2886	-58.1665
29.85	-64.1785	-65.6738	-65.2771	-63.7207					29.85	-58.4106	-57.7087	-58.1665	-58.1665
29.9	-64.1174	-65.6738	-65.2161	-63.4766					29.9	-58.2275	-57.8003	-58.3801	-58.0749
29.95	-64.0869	-65.4297	-65.0635	-63.3545					29.95	-58.4717	-57.7698	-58.5022	-57.9529
30	-64.0564	-65.6128	-65.4602	-63.6902					30	-58.2886	-57.6172	-58.5022	-57.9224
30.05	-63.9954	-65.7959	-65.4907	-63.5071					30.05	-58.3496	-57.8613	-58.5022	-58.1055
30.1	-63.8733	-65.6738	-65.3381	-63.4155					30.1	-58.4412	-57.7698	-58.4106	-58.0749
30.15	-63.9648	-65.5517	-65.155	-63.2019					30.15	-58.1665	-57.4951	-58.2886	-58.136
30.2	-64.1479	-65.4907	-65.4602	-63.2019					30.2	-58.5327	-57.8918	-58.5937	-58.0139
30.25	-64.27	-65.7349	-65.4297	-63.3545					30.25	-58.4106	-57.7698	-58.4717	-58.0749
30.3	-64.2395	-65.7349	-65.2771	-63.2324					30.3	-58.3191	-57.5867	-58.4412	-57.8918
30.35	-64.209	-65.7043	-65.2161	-63.2629					30.35	-58.4717	-57.8613	-58.4412	-57.8918
30.4	-64.1479	-65.4602	-65.4297	-62.9883					30.4	-58.3191	-57.6477	-58.5632	-57.8613
30.45	-64.2395	-65.6738	-65.3381	-63.1103					30.45	-58.5632	-57.8003	-58.5022	-57.9529
30.5	-64.1785	-65.8569	-65.2466	-63.2935					30.5	-58.5327	-57.7087	-58.4412	-57.9834
30.55	-64.0259	-65.8264	-65.5212	-63.1103					30.55	-58.197	-57.5561	-58.6853	-58.0139
30.6	-63.9648	-65.5823	-65.3381	-63.0188					30.6	-58.5632	-57.8918	-58.6243	-57.9834
30.65	-63.9954	-65.3992	-65.4297	-62.7747					30.65	-58.5022	-57.8003	-58.4412	-58.0139
30.7	-64.1479	-65.7349	-65.5212	-62.9883					30.7	-58.3191	-57.6782	-58.6853	-57.8308
30.75	-64.3005	-65.918	-65.2771	-63.0798					30.75	-58.5937	-57.8613	-58.4717	-57.8003
30.8	-64.4531	-65.7043	-65.4602	-62.9272					30.8	-58.5022	-57.6782	-58.5632	-57.7393
30.85	-64.27	-65.5517	-65.5823	-62.8967					30.85	-58.2886	-57.8918	-58.5937	-57.7087
30.9	-64.3005	-65.3381	-65.2771	-62.7136					30.9	-58.6548	-57.8308	-58.4717	-57.7087
30.95	-64.0869	-65.5517	-65.5212	-62.7441					30.95	-58.4717	-57.6477	-58.6548	-57.9224
31	-64.2395	-65.6433	-65.4297	-62.9272					31	-58.3191	-57.8308	-58.6853	-57.9834
31.05	-64.3616	-65.5823	-65.2466	-62.9578					31.05	-58.5937	-57.7698	-58.3496	-58.0139
31.1	-64.3005	-65.4297	-65.4907	-63.0188					31.1	-58.6548	-57.8003	-58.7158	-57.7393
31.15	-64.1479	-65.2771	-65.3076	-62.8357					31.15	-58.3191	-57.7393	-58.5022	-57.8613
31.2	-64.1479	-65.4602	-65.4297	-62.6831					31.2	-58.6548	-57.6782	-58.5937	-57.8003
31.25	-64.3005	-65.5517	-65.4297	-62.8967					31.25	-58.6548	-57.7698	-58.6548	-57.6782
31.3	-64.27	-65.3381	-65.3686	-63.0798					31.3	-58.5937	-57.7393	-58.5327	-57.6782
31.35	-64.0259	-65.4297	-65.4297	-63.1103					31.35	-58.4412	-57.5867	-58.7158	-57.9224
31.4	-64.331	-65.2161	-65.3686	-62.9272					31.4	-58.7463	-57.8613	-58.6853	-57.9529
31.45	-64.1785	-65.1245	-65.3076	-62.9578					31.45	-58.6548	-57.8003	-58.3801	-57.8918
31.5	-63.9648	-65.3381	-65.4297	-62.8662					31.5	-58.4717	-57.5867	-58.8074	-57.7393
31.55	-64.331	-65.3992	-65.4907	-63.0493					31.55	-58.7463	-57.7698	-58.6548	-57.5867
31.6	-64.209	-65.3381	-65.3076	-63.2019					31.6	-58.6243	-57.7698	-58.4717	-57.9834
31.65	-63.9954	-65.2161	-65.2771	-63.2019					31.65	-58.6243	-57.6172	-58.7769	-57.8918
31.7	-64.3921	-65.033	-65.3992	-63.2324					31.7	-58.7463	-57.6172	-58.6853	-57.7393
31.75	-64.209	-65.155	-65.2771	-63.2324					31.75	-58.7158	-57.7393	-58.3801	-57.6782
31.8	-63.9954	-65.4297	-65.1245	-62.9883					31.8	-58.6548	-57.7087	-58.7463	-57.9834
31.85	-64.1479	-65.3381	-65.4602	-63.1714					31.85	-58.5022	-57.5867	-58.7463	-57.9224
31.9	-63.9954	-65.3381	-65.3076	-63.446					31.9	-58.8074	-57.8003	-58.4412	-57.6477
31.95	-64.0564	-65.1245	-65.0635	-63.446					31.95	-58.6853	-57.7393	-58.6853	-58.0444
32	-64.0259	-65.0024	-65.3686	-63.5376					32	-58.6548	-57.5561	-58.7158	-57.9224
32.05	-63.9038	-65.094	-65.3076	-63.4155					32.05	-58.6243	-57.8003	-58.4717	-57.6782
32.1	-64.209	-65.2161	-65.1855	-63.385					32.1	-58.8989	-57.6782	-58.6243	-57.9529
32.15	-64.2395	-65.155	-65.1245	-63.324					32.15	-58.6853	-57.5867	-58.5937	-57.8613
32.2	-63.9038	-65.2161	-65.3076	-63.5071					32.2	-58.6243	-57.6782	-58.5937	-57.7698
32.25	-64.209	-65.033	-65.2161	-63.7817					32.25	-58.7769	-57.7393	-58.6243	-57.9834
32.3	-64.1479	-64.9109	-64.8804	-63.6597					32.3	-58.8684	-57.5561	-58.6548	-57.8003
32.35	-63.8428	-64.8193	-65.1245	-63.6597					32.35	-58.7158	-57.4646	-58.6243	-57.8003
32.4	-64.331	-65.094	-65.1855	-63.7207					32.4	-58.5022	-57.7698	-58.4412	-57.8918
32.45	-64.1479	-65.2161	-65.155	-63.5986					32.45	-58.8074	-57.5867	-58.7158	-57.8003
32.5	-63.8123	-65.0635	-64.7583	-63.5071					32.5	-58.8074	-57.4646	-58.5632	-58.0139
32.55	-64.1174	-65.0635	-65.094	-63.6597					32.55	-58.6853	-57.5561	-58.4717	-57.9224
32.6	-64.1174	-64.9719	-65.1855	-63.9343					32.6	-58.5632	-57.6782	-58.5632	-57.6782
32.65	-64.0259	-64.8804	-65.033	-64.0259					32.65	-58.96	-57.5256	-58.7463	-58.0444
32.7	-64.0259	-64.8804	-64.8193	-63.9954					32.7	-58.8074	-57.1594	-58.5327	-57.8918
32.75	-64.1785	-64.9719	-65.2161	-63.9343					32.75	-58.6548	-57.5867	-58.2886	-57.8308
32.8	-64.1479	-65.0635	-65.155	-63.9954					32.8	-58.5327	-57.5867	-58.6243	-57.9834
32.85	-63.9648	-65.0635	-65.0024	-63.9038					32.85	-58.96	-57.4341	-58.5632	-57.9224
32.9	-64.209	-65.0635	-64.7583	-63.8123					32.9	-58.7769	-57.251	-58.4106	-57.8613
32.95	-64.1785	-65.0024	-65.094	-63.9343					32.95	-58.7158	-57.6172	-58.3496	-57.9224
33	-63.9343	-64.8804	-65.0635	-64.0564					33	-58.5937	-57.5867	-58.5937	-57.8918
33.05	-64.1479	-64.7583	-64.8498	-64.1479					33.05	-58.8074	-57.373	-58.5022	-57.9224
33.1	-64.1174	-64.9109	-64.8193	-64.0869					33.1	-58.8989	-57.3425	-58.3191	-57.9529
33.15	-64.0564	-65.033	-65.0024	-64.0564					33.15	-58.7463	-57.6172	-58.2275	-57.8918
33.2	-63.8428	-65.0635	-64.9414	-64.1479					33.2	-58.5022	-57.5561	-58.5632	-57.9529
33.25	-64.1174	-64.9719	-64.9414	-64.0869					33.25	-58.8074	-57.373	-58.4717	-57.9834
33.3	-64.1174	-64.9719	-64.6667	-64.0564					33.3	-58.8684	-57.4036	-58.2886	-57.9224
33.35	-63.9343	-64.9109	-64.9719	-63.9038					33.35	-58.7463	-57.6172	-58.2886	-57.7087
33.4	-63.8428	-64.8498	-65.0024	-64.0869					33.4	-58.6548	-57.5867	-58.5022	-58.1665
33.45	-64.1479	-64.6973	-64.9719	-64.3005					33.45	-58.7769	-57.2815	-58.4717	-57.9834
33.5	-64.0869	-64.7583	-64.7888	-64.331					33.5	-58.9294	-57.3425	-58.1665	-57.7393
33.55	-64.0259	-64.8498	-65.0024	-64.27					33.55	-58.7158	-57.5867	-58.2886	-57.9224
33.6	-63.8428	-65.0024	-65.1245	-64.3005					33.6	-58.6243	-57.4951	-58.4717	-58.0749
33.65	-64.3005	-64.9414	-65.0635	-64.27					33.65	-58.6853	-57.3425	-58.4717	-57.9224
33.7	-64.1785	-64.8193	-64.8193	-64.27					33.7	-58.8684	-57.312	-58.136	-57.7393
33.75	-63.8428	-64.8193	-64.9414	-64.27					33.75	-58.7158	-57.5867	-58.2275	-58.0444
33.8	-63.8733	-64.7888	-65.033	-64.1479					33.8	-58.7463	-57.5561	-58.4106	-58.1055
33.85	-64.1479	-64.6667	-65.0024	-64.0869					33.85	-58.5327	-57.2815	-58.3496	-57.8003
33.9	-64.0259	-64.4836	-64.8804	-64.3005					33.9	-58.7158	-57.2815	-58.1665	-57.9224
33.95	-63.8733	-64.6362	-64.8193	-64.4531					33.95	-58.7769	-57.5561	-58.1055	-58.0444
34	-63.7512	-64.7888	-65.0024	-64.4836					34	-58.6548	-57.4951	-58.3496	-58.0444
34.05	-64.0564	-64.8498	-65.094	-64.4836					34.05	-58.6548	-57.373	-58.3191	-57.7393
34.1	-63.9954	-64.7888	-65.1245	-64.5142					34.1	-58.4717	-57.0679	-58.1055	-58.0444
34.15	-63.8733	-64.8804	-64.8193	-64.5142					34.15	-58.6853	-57.4036	-57.8918	-58.0139
34.2	-63.6902	-64.7583	-64.9109	-64.4226					34.2	-58.7158	-57.5561	-58.2581	-57.9834
34.25	-63.9648	-64.6667	-65.0635	-64.1479					34.25	-58.6853	-57.4036	-58.2275	-57.8613
34.3	-64.0564	-64.8804	-64.9414	-64.4531					34.3	-58.5937	-57.2205	-58.1665	-58.197
34.35	-63.9954	-64.8498	-64.9414	-64.5752					34.35	-58.3801	-57.2815	-57.9834	-58.0749
34.4	-63.6902	-64.7278	-64.6362	-64.5447					34.4	-58.6548	-57.6172	-58.1055	-58.0749
34.45	-63.9343	-64.6057	-64.8498	-64.4531					34.45	-58.7158	-57.3425	-58.2886	-58.0139
34.5	-64.0564	-64.9719	-64.9414	-64.3005					34.5	-58.6548	-57.3425	-58.136	-58.2275
34.55	-63.9954	-64.8804	-64.8498	-64.7278					34.55	-58.5022	-57.1899	-58.0749	-58.1665
34.6	-63.7512	-64.8193	-64.7583	-64.4836					34.6	-58.3801	-57.5256	-57.9529	-58.2275
34.65	-63.6597	-64.9414	-64.5447	-64.3921					34.65	-58.7463	-57.4951	-58.2275	-58.0749
34.7	-63.9343	-64.8804	-64.6973	-64.4531					34.7	-58.7158	-57.4341	-58.136	-58.3191
34.75	-63.8123	-64.6973	-64.8498	-64.6057					34.75	-58.6853	-57.4036	-58.0749	-58.2886
34.8	-63.8428	-65.0024	-64.7278	-64.4531					34.8	-58.5632	-57.3425	-58.0444	-58.2886
34.85	-63.5376	-65.1245	-64.6362	-64.27					34.85	-58.4717	-57.5256	-57.9834	-58.197
34.9	-63.7817	-64.6667	-64.4226	-64.5142					34.9	-58.6243	-57.4341	-58.197	-58.5632
34.95	-63.9648	-65.0635	-64.6057	-64.4531					34.95	-58.6853	-57.4951	-58.0749	-58.3801
35	-63.9038	-65.0635	-64.7278	-64.3616					35	-58.5327	-57.4341	-58.1055	-58.3496
35.05	-63.6291	-64.7888	-64.6362	-64.5142					35.05	-58.6853	-57.2815	-57.9834	-58.197
35.1	-63.5681	-65.094	-64.5142	-64.3005					35.1	-58.5632	-57.5561	-57.9834	-58.5632
35.15	-63.9648	-64.8498	-64.3921	-64.2395					35.15	-58.3801	-57.6172	-58.2581	-58.5022
35.2	-63.9343	-64.8498	-64.2395	-64.4226					35.2	-58.6853	-57.5561	-58.197	-58.5632
35.25	-63.8733	-65.0635	-64.5752	-64.1174					35.25	-58.7769	-57.4036	-58.1665	-58.3191
35.3	-63.6902	-64.7888	-64.5142	-64.4836					35.3	-58.5937	-57.373	-58.0139	-58.6548
35.35	-63.5986	-65.094	-64.4226	-64.3921					35.35	-58.5937	-57.6172	-58.0139	-58.6548
35.4	-63.8733	-65.033	-64.4531	-64.1174					35.4	-58.4106	-57.6782	-58.2581	-58.7158
35.45	-63.8733	-64.8804	-64.209	-64.4836					35.45	-58.5022	-57.4951	-58.2886	-58.5327
35.5	-63.8428	-65.2161	-64.3005	-64.331					35.5	-58.6243	-57.4646	-58.197	-58.5327
35.55	-63.6902	-65.0024	-64.5447	-64.0564					35.55	-58.6243	-57.3425	-58.136	-58.7158
35.6	-63.6291	-64.9719	-64.5142	-64.3921					35.6	-58.5937	-57.6172	-58.0749	-58.7158
35.65	-63.9038	-65.2466	-64.4531	-64.209					35.65	-58.6243	-57.6782	-58.3496	-58.6548
35.7	-63.8733	-65.0635	-64.2395	-64.0259					35.7	-58.5022	-57.4951	-58.2886	-58.5327
35.75	-63.8428	-65.0635	-64.1785	-64.2395					35.75	-58.4412	-57.6477	-58.2275	-58.6853
35.8	-63.8123	-65.1855	-64.1785	-64.0869					35.8	-58.6243	-57.5256	-58.2886	-58.8684
35.85	-63.7512	-65.0024	-64.331	-63.9648					35.85	-58.7769	-57.4036	-58.1055	-58.8074
35.9	-63.8428	-65.155	-64.3616	-64.331					35.9	-58.6243	-57.6782	-58.0749	-58.5937
35.95	-63.9648	-65.3381	-64.27	-64.1785					35.95	-58.5937	-57.7393	-58.3191	-58.5327
36	-63.9648	-65.2161	-64.1785	-63.9343					36	-58.5022	-57.6477	-58.3191	-58.96
36.05	-63.9038	-65.155	-64.1174	-64.3616					36.05	-58.4717	-57.6782	-58.2581	-58.7769
36.1	-63.8123	-65.5212	-64.0564	-64.209					36.1	-58.4106	-57.4646	-58.1055	-58.8074
36.15	-63.6902	-65.4297	-64.2395	-63.8733					36.15	-58.6853	-57.4646	-58.0444	-58.6548
36.2	-63.9343	-65.1245	-64.4531	-64.0564					36.2	-58.5632	-57.7393	-58.2275	-58.7769
36.25	-64.1479	-65.4602	-64.331	-64.209					36.25	-58.6243	-57.7087	-58.4106	-58.9294
36.3	-63.9954	-65.4907	-64.3005	-64.1174					36.3	-58.4717	-57.6172	-58.2581	-58.8684
36.35	-63.9954	-65.2466	-64.27	-63.8123					36.35	-58.5937	-57.6782	-58.2581	-58.8379
36.4	-63.8123	-65.4602	-64.0259	-64.1174					36.4	-58.3191	-57.5867	-58.2886	-58.7463
36.45	-63.9038	-65.4907	-64.0564	-63.9648					36.45	-58.4106	-57.5256	-58.0749	-58.6853
36.5	-64.27	-65.3686	-64.209	-63.8428					36.5	-58.5327	-57.6477	-58.1055	-58.96
36.55	-64.27	-65.2466	-64.3921	-63.9038					36.55	-58.6243	-57.8308	-58.3191	-58.8074
36.6	-64.1174	-65.5823	-64.3005	-64.0564					36.6	-58.5327	-57.7393	-58.3801	-58.8989
36.65	-64.1174	-65.5823	-64.209	-63.9648					36.65	-58.6243	-57.7087	-58.3801	-58.7769
36.7	-64.0564	-65.2771	-64.3005	-63.7207					36.7	-58.4717	-57.5561	-58.2886	-58.5937
36.75	-64.0259	-65.5823	-64.1479	-63.9038					36.75	-58.3801	-57.5867	-58.197	-58.8379
36.8	-64.1174	-65.6738	-64.0259	-63.9648					36.8	-58.2886	-57.5256	-58.1055	-58.9905
36.85	-64.209	-65.5517	-64.3005	-63.8428					36.85	-58.4106	-57.6172	-58.2581	-58.8074
36.9	-64.2395	-65.3381	-64.4531	-63.6291					36.9	-58.4717	-57.7698	-58.3496	-58.8379
36.95	-64.1479	-65.6738	-64.5142	-63.9343					36.95	-58.5022	-57.7393	-58.3801	-58.5937
37	-64.1479	-65.6738	-64.3921	-63.8733					37	-58.4717	-57.5867	-58.2275	-58.7158
37.05	-64.0259	-65.5212	-64.331	-63.6902					37.05	-58.4106	-57.6172	-58.3191	-58.8684
37.1	-64.1479	-65.3381	-64.3616	-63.4766					37.1	-58.3496	-57.5867	-58.1665	-58.96
37.15	-64.331	-65.6738	-64.2395	-63.8733					37.15	-58.2581	-57.4646	-58.0749	-58.8684
37.2	-64.3921	-65.6433	-64.0869	-63.7512					37.2	-58.1665	-57.6172	-58.136	-58.8684
37.25	-64.3921	-65.4297	-64.1174	-63.6597					37.25	-58.2275	-57.6782	-58.2581	-58.6548
37.3	-64.4226	-65.5517	-64.27	-63.385					37.3	-58.3496	-57.7087	-58.2581	-58.7158
37.35	-64.3616	-65.7043	-64.4531	-63.9343					37.35	-58.3191	-57.7698	-58.2581	-58.96
37.4	-64.331	-65.7654	-64.331	-63.7512					37.4	-58.2581	-57.6477	-58.2886	-58.9294
37.45	-64.2395	-65.6433	-64.3005	-63.6291					37.45	-58.197	-57.5867	-58.2275	-58.7463
37.5	-64.3616	-65.5517	-64.3005	-63.5071					37.5	-58.0444	-57.5561	-58.1055	-58.8074
37.55	-64.5752	-65.8264	-64.331	-63.7817					37.55	-58.2275	-57.4951	-57.9834	-58.5937
37.6	-64.6057	-65.8264	-64.3005	-63.8733					37.6	-58.2275	-57.5561	-58.136	-58.6853
37.65	-64.5142	-65.7043	-64.0259	-63.6902					37.65	-58.197	-57.7393	-58.2581	-58.8684
37.7	-64.5447	-65.6738	-64.1479	-63.4766					37.7	-57.9834	-57.7393	-58.2886	-58.8684
37.75	-64.5447	-65.8569	-64.27	-63.5986					37.75	-58.2581	-57.7698	-58.197	-58.7769
37.8	-64.4531	-65.7654	-64.4531	-63.7512					37.8	-58.1055	-57.7087	-58.2581	-58.8074
37.85	-64.4836	-65.5517	-64.4226	-63.7512					37.85	-57.8918	-57.6172	-58.197	-58.7158
37.9	-64.6667	-65.6128	-64.331	-63.5681					37.9	-58.197	-57.4646	-58.136	-58.5632
37.95	-64.7888	-65.7959	-64.331	-63.385					37.95	-58.136	-57.7393	-57.9834	-58.5937
38	-64.8193	-65.7349	-64.3616	-63.7817					38	-57.8003	-57.7087	-58.0749	-58.8379
38.05	-64.6973	-65.7043	-64.3005	-63.7207					38.05	-58.1665	-57.7393	-58.0139	-58.7769
38.1	-64.7583	-65.5823	-64.1174	-63.7817					38.1	-58.136	-57.5561	-58.2581	-58.7158
38.15	-64.7278	-65.8569	-64.2395	-63.5071					38.15	-57.8308	-57.5867	-58.3191	-58.6853
38.2	-64.6057	-65.7654	-64.5752	-63.9038					38.2	-58.1665	-57.7698	-58.2581	-58.6853
38.25	-64.5142	-65.8264	-64.5447	-63.9648					38.25	-57.9529	-57.7393	-58.1665	-58.5022
38.3	-64.6362	-65.5212	-64.4531	-63.8733					38.3	-57.9834	-57.4036	-58.0444	-58.5632
38.35	-64.7888	-65.6738	-64.3005	-63.7207					38.35	-58.0139	-57.8308	-57.9529	-58.7463
38.4	-65.0024	-65.7654	-64.4836	-63.7207					38.4	-57.7393	-57.7087	-58.3191	-58.7463
38.45	-64.9719	-65.7043	-64.6973	-64.0259					38.45	-58.1055	-57.4646	-58.2581	-58.7158
38.5	-64.8804	-65.5212	-64.5752	-64.0259					38.5	-57.9834	-57.7087	-58.1665	-58.6548
38.55	-64.7888	-65.4907	-64.331	-63.9954					38.55	-57.8003	-57.7087	-58.0139	-58.5937
38.6	-64.8193	-65.7349	-64.6973	-63.7817					38.6	-58.0139	-57.4341	-58.3496	-58.4717
38.65	-64.8193	-65.6433	-64.6973	-63.9038					38.65	-57.8918	-57.7393	-58.1665	-58.4412
38.7	-64.6362	-65.6738	-64.5752	-64.1174					38.7	-58.0139	-57.6172	-58.1665	-58.4717
38.75	-64.4836	-65.3381	-64.7583	-64.1479					38.75	-58.0444	-57.5256	-58.0444	-58.6548
38.8	-64.5752	-65.5517	-64.7583	-64.1785					38.8	-57.6477	-57.7087	-58.3191	-58.6853
38.85	-64.6973	-65.7349	-64.6973	-64.0869					38.85	-58.0749	-57.5561	-58.136	-58.6853
38.9	-64.7888	-65.6128	-64.8498	-64.0869					38.9	-57.9529	-57.6782	-58.0749	-58.5632
38.95	-64.8193	-65.5823	-64.8498	-64.1785					38.95	-57.7393	-57.6782	-58.2275	-58.5632
39	-64.7278	-65.2161	-64.6667	-64.3005					39	-58.0749	-57.4036	-58.1665	-58.4717
39.05	-64.8193	-65.4602	-65.0024	-64.2395					39.05	-57.9529	-57.7393	-58.2581	-58.4717
39.1	-64.6057	-65.6128	-65.033	-64.209					39.1	-57.8003	-57.5256	-58.3191	-58.2581
39.15	-64.5142	-65.4602	-64.6362	-64.0259					39.15	-58.0444	-57.6477	-57.9529	-58.4106
39.2	-64.3921	-65.4297	-64.9719	-64.2395					39.2	-57.9224	-57.7087	-58.3801	-58.5937
39.25	-64.6667	-65.1855	-64.9719	-64.3616					39.25	-57.7087	-57.4036	-58.2275	-58.6548
39.3	-64.7888	-65.4602	-64.8193	-64.209					39.3	-58.0749	-57.7087	-58.1055	-58.5327
39.35	-64.6057	-65.5212	-65.0635	-64.209					39.35	-57.8918	-57.7087	-58.2581	-58.4717
39.4	-64.4836	-65.4602	-64.8193	-64.0564					39.4	-57.7087	-57.4036	-58.1665	-58.4717
39.45	-64.3616	-65.4297	-64.9719	-64.1785					39.45	-57.9834	-57.7393	-58.3496	-58.5632
39.5	-64.6667	-65.2161	-65.0635	-64.3921					39.5	-57.9834	-57.6477	-58.2886	-58.3496
39.55	-64.5752	-65.4602	-64.7583	-64.4836					39.55	-57.6477	-57.5561	-58.0139	-58.197
39.6	-64.2395	-65.6433	-65.1245	-64.3921					39.6	-57.9224	-57.7698	-58.3496	-58.2886
39.65	-64.4226	-65.4907	-65.155	-64.27					39.65	-57.9224	-57.6172	-58.1055	-58.4717
39.7	-64.4836	-65.4602	-64.7888	-64.1174					39.7	-57.8918	-57.5256	-58.3191	-58.4412
39.75	-64.331	-65.3686	-65.2771	-64.3005					39.75	-57.8003	-57.7698	-58.3191	-58.4412
39.8	-64.209	-65.2161	-65.1855	-64.3921					39.8	-57.9834	-57.5867	-58.1055	-58.3801
39.85	-64.4226	-65.4297	-64.7583	-64.331					39.85	-57.8613	-57.5561	-58.3801	-58.2886
39.9	-64.3005	-65.3686	-65.155	-64.2395					39.9	-57.6172	-57.8003	-58.3191	-58.3801
39.95	-64.3005	-65.3381	-65.155	-64.2395					39.95	-57.9529	-57.7698	-58.1055	-58.4412
40	-64.3616	-65.2771	-64.9109	-64.0869					40	-57.8003	-57.6477	-58.4106	-58.3191
40.05	-64.209	-65.0635	-65.033	-64.3005					40.05	-57.7393	-57.8918	-58.3496	-58.136
40.1	-64.27	-65.2161	-65.0024	-64.3921					40.1	-57.7393	-57.8003	-58.0444	-58.4717
40.15	-64.3616	-65.3381	-64.9719	-64.5142					40.15	-57.8918	-57.5867	-58.3801	-58.3801
40.2	-64.1174	-65.3992	-64.9414	-64.331					40.2	-57.8308	-57.9224	-58.3496	-58.1665
40.25	-64.209	-65.2771	-65.1245	-64.3005					40.25	-57.5256	-57.8613	-58.0139	-58.4717
40.3	-64.2395	-65.2466	-65.033	-64.2395					40.3	-57.9224	-57.7698	-58.3496	-58.3191
40.35	-63.9038	-64.9719	-64.9109	-64.1785					40.35	-57.8308	-57.8613	-58.197	-58.197
40.4	-64.209	-65.1855	-65.2161	-64.4531					40.4	-57.8003	-57.9224	-58.0139	-58.4412
40.45	-64.1479	-65.3381	-65.033	-64.4836					40.45	-57.7087	-57.9224	-58.2581	-58.4412
40.5	-63.8733	-65.3381	-64.8498	-64.3616					40.5	-58.0749	-57.6782	-58.197	-58.1055
40.55	-64.3005	-65.155	-64.9414	-64.3616					40.55	-57.8918	-58.0749	-58.1055	-58.4412
40.6	-64.1174	-65.155	-65.1245	-64.2395					40.6	-57.7698	-57.8918	-58.2275	-58.3191
40.65	-63.8428	-65.0024	-65.0024	-64.1174					40.65	-57.8003	-57.7087	-58.197	-58.2275
40.7	-64.2395	-64.8804	-64.6057	-64.0564					40.7	-58.0749	-57.8308	-58.1665	-58.4106
40.75	-64.0564	-65.1245	-65.033	-64.1785					40.75	-57.9834	-57.9529	-57.9834	-58.3496
40.8	-63.8733	-65.2161	-64.9109	-64.3921					40.8	-57.7393	-57.8613	-58.3191	-58.3191
40.85	-64.0869	-65.3076	-64.8498	-64.331					40.85	-57.9224	-57.6782	-58.2275	-58.4106
40.9	-63.9954	-65.2161	-64.6667	-64.3005					40.9	-58.0444	-57.9834	-58.0139	-58.136
40.95	-63.6291	-65.1245	-64.9719	-64.209					40.95	-57.9529	-57.8613	-58.136	-58.4717
41	-63.9954	-64.9719	-64.9719	-64.1785					41	-57.7393	-57.8918	-58.197	-58.4412
41.05	-63.9038	-65.0024	-64.8804	-64.0564					41.05	-58.0444	-57.8308	-58.136	-58.1665
41.1	-63.7512	-65.1855	-64.6973	-64.1174					41.1	-58.0444	-57.9834	-57.9834	-58.5022
41.15	-63.8123	-65.2771	-65.0024	-64.1785					41.15	-57.9834	-57.9834	-58.197	-58.3496
41.2	-64.0259	-65.1855	-64.9414	-64.209					41.2	-57.8308	-57.7393	-58.197	-58.1665
41.25	-63.8733	-65.2161	-64.7888	-64.1785					41.25	-57.9529	-57.8918	-58.0749	-58.5327
41.3	-63.5071	-65.155	-64.7278	-64.209					41.3	-58.1055	-57.9529	-58.1665	-58.3496
41.35	-63.9038	-65.033	-64.9414	-64.1785					41.35	-57.9224	-57.9834	-58.2275	-58.2275
41.4	-63.8428	-64.9414	-64.8193	-64.0259					41.4	-57.7393	-57.6477	-58.197	-58.4717
41.45	-63.8428	-64.9414	-64.6362	-64.0564					41.45	-57.8918	-57.9529	-57.9529	-58.4717
41.5	-63.6291	-65.2161	-64.5447	-63.9343					41.5	-58.0444	-57.8613	-58.3191	-58.136
41.55	-63.8123	-65.1855	-64.8193	-64.1479					41.55	-58.0139	-57.8613	-58.1665	-58.5632
41.6	-63.8123	-65.094	-64.6667	-64.3005					41.6	-57.8308	-57.6477	-58.1665	-58.4717
41.65	-63.5986	-65.0635	-64.6362	-64.3921					41.65	-57.7698	-57.9529	-58.0139	-58.2275
41.7	-63.8123	-65.1245	-64.3921	-64.3921					41.7	-58.1055	-57.8613	-58.3496	-58.3801
41.75	-63.8733	-65.033	-64.7278	-64.2395					41.75	-57.8918	-57.8613	-58.136	-58.3496
41.8	-63.8123	-64.7583	-64.6667	-64.2395					41.8	-57.8918	-57.6172	-58.1055	-58.2581
41.85	-63.6291	-64.8193	-64.6362	-64.3005					41.85	-57.6477	-57.9834	-58.1055	-58.2581
41.9	-63.9648	-64.9414	-64.4836	-64.1174					41.9	-58.0139	-57.8918	-58.2886	-58.3191
41.95	-63.9038	-65.033	-64.6362	-63.9954					41.95	-57.8613	-57.8613	-58.197	-58.2886
42	-63.9038	-65.1245	-64.6362	-64.0259					42	-57.8918	-57.6477	-58.0749	-58.0444
42.05	-63.7817	-64.8804	-64.5752	-64.1174					42.05	-57.6782	-57.9224	-58.0444	-58.3496
42.1	-64.0564	-64.9414	-64.3921	-64.3921					42.1	-57.8003	-57.8613	-58.2275	-58.2275
42.15	-63.9038	-64.9109	-64.5142	-64.3921					42.15	-57.9224	-57.8613	-58.3496	-58.1055
42.2	-63.9648	-64.8193	-64.5752	-64.3921					42.2	-57.8308	-57.6782	-58.136	-58.1055
42.25	-63.6902	-64.6667	-64.5142	-64.27					42.25	-57.8308	-57.8003	-58.0749	-58.3191
42.3	-63.9648	-64.6973	-64.4836	-64.3921					42.3	-57.6782	-57.8918	-58.2886	-58.1055
42.35	-64.1174	-64.9414	-64.2395	-64.4531					42.35	-57.8308	-57.8308	-58.1055	-57.9224
42.4	-64.0259	-65.1245	-64.5752	-64.27					42.4	-57.9834	-57.7393	-58.197	-58.0749
42.45	-63.8428	-64.9109	-64.6057	-64.1174					42.45	-57.8613	-57.6172	-58.0444	-58.136
42.5	-63.9954	-64.9414	-64.5752	-64.331					42.5	-57.8918	-57.8613	-58.2581	-58.0139
42.55	-64.0869	-64.8498	-64.3616	-64.4836					42.55	-57.5867	-57.8613	-58.197	-57.8613
42.6	-64.1479	-64.7278	-64.4531	-64.5142					42.6	-57.8918	-57.7698	-58.2581	-58.1665
42.65	-63.9648	-65.0024	-64.5752	-64.4531					42.65	-57.9529	-57.5256	-57.9529	-58.1055
42.7	-63.9648	-64.9109	-64.6362	-64.331					42.7	-57.8918	-57.8613	-58.2886	-57.9834
42.75	-64.27	-64.8804	-64.5447	-64.3005					42.75	-57.7393	-57.8918	-58.3191	-57.8003
42.8	-64.1174	-64.7888	-64.27	-64.5447					42.8	-57.5867	-57.8003	-58.2275	-58.136
42.85	-64.0869	-65.094	-64.4226	-64.5447					42.85	-57.8308	-57.6782	-58.1055	-57.9529
42.9	-63.8733	-65.033	-64.5447	-64.4226					42.9	-57.9224	-57.6172	-58.1665	-57.8308
42.95	-64.209	-64.7583	-64.6057	-64.4836					42.95	-57.8003	-57.8308	-58.3801	-57.8003
43	-64.27	-65.1245	-64.5142	-64.7583					43	-57.7393	-57.8308	-58.2581	-57.9834
43.05	-64.209	-65.094	-64.331	-64.6057					43.05	-57.5561	-57.7393	-58.2886	-57.9224
43.1	-64.0564	-64.7888	-64.4836	-64.3616					43.1	-57.7698	-57.5867	-58.136	-57.9224
43.15	-64.0869	-65.1245	-64.7583	-64.7278					43.15	-57.8308	-57.6782	-58.3496	-57.7393
43.2	-64.3005	-65.094	-64.7278	-64.7278					43.2	-57.7087	-57.8613	-58.3496	-58.0139
43.25	-64.209	-64.7278	-64.6057	-64.4531					43.25	-57.7087	-57.6782	-58.3801	-57.9529
43.3	-64.2395	-65.155	-64.4531	-64.6973					43.3	-57.6477	-57.6782	-58.1665	-57.8613
43.35	-64.1174	-65.0024	-64.5752	-64.6362					43.35	-57.5256	-57.5867	-58.1055	-57.6782
43.4	-64.1785	-64.8193	-64.7278	-64.3005					43.4	-57.8613	-57.6477	-58.5022	-57.9224
43.45	-64.3616	-65.094	-64.6973	-64.7278					43.45	-57.8003	-57.7393	-58.3191	-57.9224
43.5	-64.3005	-64.9414	-64.6667	-64.6667					43.5	-57.7393	-57.7087	-58.2886	-57.8308
43.55	-64.209	-65.094	-64.5447	-64.5142					43.55	-57.6477	-57.7087	-58.0749	-57.7698
43.6	-64.0259	-65.0024	-64.4226	-64.7583					43.6	-57.5256	-57.5256	-58.1665	-57.8308
43.65	-64.1785	-64.8498	-64.6973	-64.6667					43.65	-57.5867	-57.5561	-58.4412	-57.9834
43.7	-64.27	-65.2161	-64.8193	-64.6057					43.7	-57.7393	-57.7393	-58.2275	-57.8308
43.75	-64.1785	-65.1245	-64.6362	-64.7888					43.75	-57.7087	-57.7393	-58.2886	-57.7698
43.8	-64.1785	-64.9719	-64.7583	-64.6362					43.8	-57.6782	-57.7393	-58.0749	-57.6782
43.85	-63.9038	-65.2161	-64.5142	-64.8193					43.85	-57.6477	-57.5867	-58.136	-57.9224
43.9	-64.0564	-65.0024	-64.5752	-64.7888					43.9	-57.5256	-57.5256	-58.3496	-57.8003
43.95	-64.27	-65.1245	-64.7583	-64.4226					43.95	-57.4341	-57.6782	-58.2275	-57.8613
44	-64.2395	-65.1245	-64.8804	-64.8804					44	-57.7393	-57.8308	-58.197	-57.6477
44.05	-64.2395	-64.9414	-64.8193	-64.7278					44.05	-57.8003	-57.6172	-58.197	-57.8003
44.1	-63.9038	-65.155	-64.6667	-64.5142					44.1	-57.6782	-57.6477	-58.0444	-57.8918
44.15	-63.9343	-65.2466	-64.4531	-64.7278					44.15	-57.6172	-57.4951	-58.2581	-57.9224
44.2	-64.2395	-64.9719	-64.4531	-64.7888					44.2	-57.5867	-57.5256	-58.3191	-57.8613
44.25	-64.1479	-65.1245	-64.7278	-64.5752					44.25	-57.5256	-57.7698	-58.2886	-57.6477
44.3	-64.1174	-65.2466	-64.7278	-64.7278					44.3	-57.6782	-57.7393	-58.136	-57.8613
44.35	-63.9038	-65.155	-64.6667	-64.7583					44.35	-57.8308	-57.6172	-58.0749	-58.0444
44.4	-63.7512	-65.1245	-64.6362	-64.6973					44.4	-57.7698	-57.6477	-58.2581	-57.8613
44.45	-63.9648	-65.3992	-64.6057	-64.6667					44.45	-57.7698	-57.5256	-58.4106	-57.8918
44.5	-64.0869	-65.3686	-64.4226	-64.9414					44.5	-57.6172	-57.4341	-58.2886	-57.6477
44.55	-64.0259	-65.1855	-64.5447	-64.7583					44.55	-57.5561	-57.7393	-58.2275	-57.9529
44.6	-63.8733	-65.4602	-64.8193	-64.4531					44.6	-57.4341	-57.7393	-58.1665	-58.0139
44.65	-63.8428	-65.3992	-64.7888	-64.8193					44.65	-57.6172	-57.6172	-58.1055	-57.8918
44.7	-63.7207	-65.2161	-64.7278	-64.6973					44.7	-57.8003	-57.7393	-58.197	-57.7393
44.75	-63.8123	-65.3686	-64.6057	-64.6057					44.75	-57.7087	-57.6172	-58.3191	-57.7087
44.8	-63.9343	-65.4907	-64.4836	-64.6057					44.8	-57.7087	-57.4951	-58.3191	-57.9834
44.85	-63.9038	-65.3076	-64.3616	-64.7888					44.85	-57.6782	-57.6172	-58.3496	-57.9529
44.9	-63.9343	-65.2466	-64.5142	-64.7583					44.9	-57.6172	-57.8308	-58.197	-57.8308
44.95	-63.6291	-65.6128	-64.7583	-64.4531					44.95	-57.4341	-57.7087	-58.0139	-57.8613
45	-63.4766	-65.4907	-64.6973	-64.6362					45	-57.5256	-57.7698	-58.0444	-57.7393
45.05	-63.6291	-65.2771	-64.5752	-64.7278					45.05	-57.6782	-57.6477	-58.3496	-57.8003
45.1	-63.7512	-65.5517	-64.7278	-64.7278					45.1	-57.7393	-57.6477	-58.3496	-57.8918
45.15	-63.6902	-65.5517	-64.5752	-64.4226					45.15	-57.7087	-57.4951	-58.2581	-57.8613
45.2	-63.6597	-65.6128	-64.3616	-64.6667					45.2	-57.7087	-57.6782	-58.1665	-57.9224
45.25	-63.5376	-65.3686	-64.5447	-64.6362					45.25	-57.8003	-57.7393	-58.136	-57.7087
45.3	-63.5071	-65.6738	-64.7583	-64.5447					45.3	-57.6477	-57.8003	-57.9834	-57.6477
45.35	-63.4155	-65.6128	-64.8804	-64.27					45.35	-57.6172	-57.6782	-58.136	-57.8308
45.4	-63.6291	-65.5212	-64.8498	-64.6057					45.4	-57.5561	-57.8003	-58.2886	-57.9529
45.45	-63.6902	-65.5517	-64.7278	-64.4531					45.45	-57.6477	-57.6172	-58.2886	-57.8003
45.5	-63.6291	-65.7654	-64.7888	-64.3921					45.5	-57.8308	-57.4951	-58.1665	-57.8003
45.55	-63.5986	-65.6738	-64.6973	-64.2395					45.55	-57.8003	-57.6172	-58.197	-57.5867
45.6	-63.446	-65.5212	-64.5752	-64.4531					45.6	-57.7393	-57.7393	-58.0749	-57.7698
45.65	-63.3545	-65.5517	-64.5142	-64.5447					45.65	-57.8613	-57.8003	-58.0444	-57.8308
45.7	-63.2019	-65.7959	-64.7888	-64.3616					45.7	-57.6477	-57.8003	-58.0749	-57.8003
45.75	-63.385	-65.7043	-64.9719	-64.209					45.75	-57.5561	-57.7087	-58.3496	-57.8613
45.8	-63.4766	-65.6128	-64.9719	-64.4836					45.8	-57.8308	-57.7393	-58.2275	-57.8613
45.85	-63.4155	-65.7349	-64.9414	-64.4226					45.85	-57.8308	-57.6172	-58.2275	-57.5561
45.9	-63.2935	-65.7959	-64.9109	-64.3921					45.9	-57.7087	-57.5561	-58.197	-57.5561
45.95	-63.2324	-65.7959	-65.0024	-64.1479					45.95	-57.5256	-57.5561	-58.1055	-57.8918
46	-63.1409	-65.4602	-64.9109	-64.3921					46	-57.8613	-57.6172	-58.1055	-57.9529
46.05	-63.0188	-65.7349	-64.7888	-64.3616					46.05	-57.8308	-57.8003	-58.0749	-57.7393
46.1	-63.1103	-65.7654	-64.6667	-64.3005					46.1	-57.7087	-57.8308	-58.1055	-57.7698
46.15	-63.2935	-65.6738	-64.8804	-64.1174					46.15	-57.6477	-57.6782	-58.2886	-57.7698
46.2	-63.5071	-65.4297	-65.033	-64.0259					46.2	-57.9224	-57.7393	-58.2886	-57.7393
46.25	-63.324	-65.5823	-65.0024	-64.3921					46.25	-57.8918	-57.4646	-58.2275	-57.7698
46.3	-63.3545	-65.7654	-65.094	-64.27					46.3	-57.7087	-57.6172	-58.1665	-57.9529
46.35	-63.3545	-65.6738	-64.9109	-64.1174					46.35	-57.8308	-57.7393	-58.1665	-58.0139
46.4	-63.2629	-65.4907	-64.9719	-63.9343					46.4	-57.7087	-57.6172	-58.0749	-57.9834
46.45	-63.2019	-65.5823	-64.8498	-64.209					46.45	-57.8003	-57.5867	-57.9834	-57.8918
46.5	-63.0798	-65.7349	-64.7583	-64.209					46.5	-57.7393	-57.4951	-58.0139	-57.8613
46.55	-63.0493	-65.7043	-64.9109	-64.209					46.55	-57.5561	-57.8613	-58.197	-57.8003
46.6	-63.2629	-65.6738	-65.155	-64.0869					46.6	-57.9224	-57.6477	-58.197	-57.8308
46.65	-63.324	-65.4602	-65.033	-63.9954					46.65	-57.8308	-57.4036	-58.1055	-57.9529
46.7	-63.385	-65.7654	-64.9414	-64.209					46.7	-57.5561	-57.6782	-57.9529	-58.0749
46.75	-63.2935	-65.7959	-64.7583	-64.0869					46.75	-57.7698	-57.5867	-57.8613	-58.0444
46.8	-63.3545	-65.6128	-65.1855	-63.9954					46.8	-57.6782	-57.4341	-58.136	-58.1055
46.85	-63.3545	-65.4907	-65.0024	-63.8123					46.85	-57.8308	-57.6172	-58.0749	-57.9224
46.9	-63.2324	-65.5823	-64.8498	-63.9038					46.9	-57.6477	-57.6477	-57.9224	-57.9224
46.95	-63.2019	-65.7654	-64.9109	-64.0259					46.95	-57.4036	-57.373	-57.8308	-57.8613
47	-63.1714	-65.6738	-65.0635	-63.9038					47	-57.7698	-57.5867	-58.136	-58.0749
47.05	-63.2324	-65.5517	-65.033	-63.9954					47.05	-57.6477	-57.4646	-58.0139	-58.1055
47.1	-63.324	-65.4602	-64.7888	-63.7512					47.1	-57.5256	-57.373	-57.7698	-58.1665
47.15	-63.4155	-65.6738	-65.155	-63.8123					47.15	-57.6172	-57.6477	-58.0444	-58.197
47.2	-63.446	-65.7654	-65.0024	-63.9648					47.2	-57.4341	-57.373	-57.9834	-58.2581
47.25	-63.4155	-65.7349	-64.8804	-63.8428					47.25	-57.6782	-57.4341	-57.6782	-58.1055
47.3	-63.3545	-65.6128	-65.1855	-63.9038					47.3	-57.5256	-57.4036	-57.9834	-58.0749
47.35	-63.385	-65.5823	-64.9414	-63.5986					47.35	-57.312	-57.251	-58.0139	-58.1665
47.4	-63.2935	-65.7959	-64.9109	-63.5681					47.4	-57.6782	-57.4951	-57.6782	-58.0749
47.45	-63.2629	-65.7043	-65.094	-63.7512					47.45	-57.6477	-57.3425	-57.9529	-58.0749
47.5	-63.324	-65.6738	-64.7888	-63.6597					47.5	-57.251	-57.4951	-57.7393	-58.197
47.55	-63.5071	-65.4907	-65.033	-63.6291					47.55	-57.6172	-57.373	-57.8308	-58.3191
47.6	-63.5376	-65.4907	-65.033	-63.446					47.6	-57.5867	-57.0984	-57.8918	-58.3801
47.65	-63.5071	-65.6433	-64.6973	-63.324					47.65	-57.4341	-57.4646	-57.6477	-58.1665
47.7	-63.5071	-65.6128	-65.094	-63.5681					47.7	-57.5561	-57.4036	-57.8613	-58.2275
47.75	-63.4766	-65.5823	-64.9414	-63.5681					47.75	-57.5256	-57.1594	-57.8613	-58.1665
47.8	-63.6291	-65.3992	-64.7583	-63.5681					47.8	-57.4951	-57.4341	-57.7393	-58.1665
47.85	-63.6597	-65.3381	-64.9414	-63.4766					47.85	-57.5867	-57.312	-57.8918	-57.9529
47.9	-63.385	-65.5517	-64.9109	-63.3545					47.9	-57.5867	-57.2205	-57.6782	-58.1055
47.95	-63.6902	-65.7043	-64.9109	-63.4766					47.95	-57.5256	-57.5256	-57.8918	-58.2886
48	-63.7207	-65.5823	-64.9109	-63.5376					48	-57.4951	-57.251	-57.8613	-58.2886
48.05	-63.6291	-65.3992	-64.7888	-63.5071					48.05	-57.7087	-57.2205	-57.5561	-58.136
48.1	-63.6902	-65.1855	-64.9109	-63.5376					48.1	-57.5256	-57.373	-57.8613	-58.1055
48.15	-63.8733	-65.3686	-65.0024	-63.4155					48.15	-57.312	-57.312	-57.7087	-57.9529
48.2	-63.6597	-65.5517	-64.7888	-63.2629					48.2	-57.6172	-57.1289	-57.6172	-58.2581
48.25	-63.7207	-65.3992	-64.7278	-63.2935					48.25	-57.5867	-57.3425	-57.8308	-58.2275
48.3	-63.9648	-65.3381	-64.9109	-63.4766					48.3	-57.4036	-57.2815	-57.6477	-58.2275
48.35	-63.8428	-65.2466	-64.8193	-63.5681					48.35	-57.5256	-57.2205	-57.7087	-57.9834
48.4	-63.8428	-65.0635	-64.5752	-63.4766					48.4	-57.6782	-57.373	-57.8003	-58.2581
48.45	-63.8733	-65.2771	-64.8804	-63.5376					48.45	-57.6477	-57.2815	-57.6172	-58.136
48.5	-63.7512	-65.4297	-64.8804	-63.3545					48.5	-57.4036	-57.0984	-57.6477	-58.1665
48.55	-63.9648	-65.3381	-64.6667	-63.324					48.55	-57.6477	-57.373	-57.7698	-58.136
48.6	-64.0869	-65.3686	-64.9109	-63.5681					48.6	-57.6782	-57.2205	-57.6477	-58.2886
48.65	-63.5986	-65.1855	-64.8498	-63.6597					48.65	-57.6172	-57.0984	-57.6477	-58.1665
48.7	-64.0869	-65.0024	-64.8498	-63.5376					48.7	-57.4341	-57.2815	-57.8003	-58.136
48.75	-64.1174	-65.2161	-64.7888	-63.5681					48.75	-57.7698	-57.3425	-57.7087	-58.2275
48.8	-63.7512	-65.3992	-65.0635	-63.5071					48.8	-57.7087	-57.0984	-57.5561	-58.136
48.85	-64.209	-65.2466	-64.9414	-63.2629					48.85	-57.4646	-57.0374	-57.7698	-58.1055
48.9	-64.0869	-65.2161	-64.6362	-63.2935					48.9	-57.6782	-57.2815	-57.6782	-58.1665
48.95	-64.0259	-65.033	-65.0024	-63.5376					48.95	-57.8003	-57.251	-57.4951	-58.0444
49	-64.3616	-64.8804	-64.9414	-63.6291					49	-57.7087	-56.9153	-57.8613	-58.2581
49.05	-64.1174	-65.0635	-64.9414	-63.5681					49.05	-57.5256	-57.1594	-57.7087	-58.197
49.1	-64.0869	-65.2161	-64.7888	-63.5681					49.1	-57.7698	-57.2205	-57.5561	-57.8613
49.15	-64.4226	-65.2161	-65.1245	-63.5071					49.15	-57.7698	-57.1899	-57.7698	-58.2275
49.2	-64.3616	-65.0635	-65.1245	-63.5071					49.2	-57.7393	-56.8848	-57.8308	-58.136
49.25	-64.1479	-65.2161	-64.9414	-63.4155					49.25	-57.5256	-57.1899	-57.6172	-57.8918
49.3	-64.5447	-65.033	-64.9414	-63.4766					49.3	-57.8308	-57.1594	-57.4951	-58.136
49.35	-64.4836	-64.8498	-65.2161	-63.6291					49.35	-57.7087	-57.0068	-57.8613	-57.9224
49.4	-64.27	-65.0635	-65.2161	-63.7512					49.4	-57.7393	-56.9153	-57.8308	-58.1055
49.45	-64.4836	-65.2466	-65.0635	-63.6902					49.45	-57.5561	-57.0374	-57.4341	-58.0749
49.5	-64.5752	-65.2771	-65.0024	-63.6597					49.5	-57.8308	-57.0984	-57.7698	-57.9529
49.55	-64.5142	-65.033	-65.3381	-63.4766					49.55	-57.8003	-56.8237	-57.8308	-58.1665
49.6	-64.4531	-65.1245	-65.2161	-63.324					49.6	-57.7698	-56.9763	-57.7698	-58.0749
49.65	-64.8193	-64.9719	-65.0024	-63.385					49.65	-57.4951	-57.0374	-57.4341	-57.7698
49.7	-64.6362	-64.8498	-65.1855	-63.5071					49.7	-57.8003	-57.0068	-57.8918	-58.1055
49.75	-64.4226	-64.8804	-65.3381	-63.6597					49.75	-57.7698	-56.8848	-57.7698	-58.1055
49.8	-64.7278	-65.094	-65.2161	-63.6902					49.8	-57.7393	-57.0679	-57.7393	-57.8613
49.85	-64.7278	-65.1245	-65.1245	-63.7207					49.85	-57.4646	-57.0374	-57.5867	-57.9834
49.9	-64.6362	-65.1855	-65.0635	-63.6291					49.9	-57.7393	-57.0374	-57.8308	-58.0139
49.95	-64.3616	-65.094	-65.3076	-63.7512					49.95	-57.7393	-56.9153	-57.7698	-57.9834
50	-64.7583	-65.0635	-65.2161	-63.5681					50	-57.7698	-57.0984	-57.5867	-57.9224
50.05	-64.6667	-64.9414	-65.2161	-63.5986					50.05	-57.5256	-57.0374	-57.6782	-58.1055
50.1	-64.6057	-64.9414	-65.0635	-63.5986					50.1	-57.7087	-57.0068	-57.8613	-57.9529
50.15	-64.5142	-64.8804	-65.2771	-63.6597					50.15	-57.8308	-56.9458	-57.8003	-57.9224
50.2	-64.7888	-64.9719	-65.2161	-63.7817					50.2	-57.8308	-57.1594	-57.5561	-58.2275
50.25	-64.8498	-65.0635	-65.2466	-63.8733					50.25	-57.5561	-57.0679	-57.7087	-58.0444
50.3	-64.7583	-65.094	-65.0635	-63.8123					50.3	-57.5561	-57.0679	-57.8003	-57.8613
50.35	-64.6057	-64.9719	-65.3381	-63.7817					50.35	-57.7698	-56.9763	-57.7698	-58.0749
50.4	-64.8498	-65.0024	-65.2466	-63.7512					50.4	-57.7393	-57.2205	-57.5561	-58.0749
50.45	-64.9414	-64.9414	-65.1855	-63.8123					50.45	-57.6172	-57.1289	-57.7698	-57.9834
50.5	-64.8193	-64.8804	-65.0024	-63.8123					50.5	-57.4036	-57.1594	-57.8003	-57.7393
50.55	-64.6362	-64.8804	-65.1855	-63.6902					50.55	-57.6782	-56.9153	-57.8003	-58.136
50.6	-64.7888	-64.7888	-65.2466	-63.6902					50.6	-57.8918	-57.1594	-57.6172	-58.0139
50.65	-64.7583	-64.9719	-65.1855	-63.6291					50.65	-57.5867	-57.1594	-57.8308	-57.9529
50.7	-64.6362	-65.0635	-65.155	-63.8123					50.7	-57.5867	-57.251	-57.8918	-57.9224
50.75	-64.4836	-65.1855	-64.9719	-64.0564					50.75	-57.4951	-57.0068	-57.8613	-58.1665
50.8	-64.7888	-65.1245	-65.1245	-63.9648					50.8	-57.8308	-57.0984	-57.7087	-58.0139
50.85	-64.6362	-64.9719	-65.2161	-63.9038					50.85	-57.7698	-57.2815	-57.9224	-57.8308
50.9	-64.6362	-64.8193	-65.2161	-63.9343					50.9	-57.7087	-57.1899	-57.9529	-57.9834
50.95	-64.3616	-65.0635	-65.094	-63.7817					50.95	-57.5867	-57.0374	-57.9224	-58.136
51	-64.6362	-65.094	-64.8804	-63.7207					51	-57.6172	-56.9153	-57.8308	-58.0444
51.05	-64.5752	-65.0024	-65.094	-63.9343					51.05	-57.8308	-57.1899	-57.9529	-57.7087
51.1	-64.5447	-64.7583	-65.094	-63.9038					51.1	-57.8003	-57.2205	-58.0749	-58.0139
51.15	-64.331	-65.0635	-65.094	-63.9038					51.15	-57.7393	-57.0984	-58.0139	-58.0749
51.2	-64.4226	-65.033	-64.9109	-63.6597					51.2	-57.6782	-56.9458	-57.9834	-58.0444
51.25	-64.5447	-64.8804	-64.8804	-64.0564					51.25	-57.6172	-57.0068	-57.8003	-57.6782
51.3	-64.4226	-64.9109	-65.1245	-63.9954					51.3	-57.8003	-57.2815	-58.1055	-58.0139
51.35	-64.3005	-65.2161	-65.2466	-63.9038					51.35	-57.9224	-57.1594	-58.0749	-58.1055
51.4	-64.1174	-65.094	-65.1855	-63.9038					51.4	-57.9224	-57.0068	-58.0444	-57.9224
51.45	-64.3616	-65.033	-64.8498	-63.9954					51.45	-57.6782	-56.9153	-57.7393	-57.7087
51.5	-64.331	-65.155	-64.9109	-63.8733					51.5	-57.5867	-57.1899	-57.9834	-57.9529
51.55	-64.3005	-64.9719	-65.155	-63.9038					51.55	-57.7698	-57.2205	-58.136	-58.0444
51.6	-64.0869	-65.094	-65.155	-64.1174					51.6	-57.9529	-57.0984	-58.1055	-57.9224
51.65	-64.1174	-65.0635	-65.033	-63.9038					51.65	-57.7393	-57.0374	-57.9529	-57.7087
51.7	-64.331	-64.7888	-64.8498	-63.8123					51.7	-57.8003	-56.9763	-57.8308	-57.8308
51.75	-64.3005	-64.9414	-64.7278	-64.0564					51.75	-57.6172	-57.1899	-58.197	-58.0139
51.8	-64.3005	-64.9719	-64.9414	-63.8733					51.8	-57.7087	-57.1899	-58.1665	-57.9529
51.85	-63.9343	-64.6362	-65.0024	-63.9038					51.85	-57.8308	-57.0679	-58.0749	-57.7698
51.9	-64.0869	-65.033	-64.8804	-64.0564					51.9	-57.8308	-57.1594	-58.0444	-57.9224
51.95	-64.3005	-64.7888	-64.7583	-63.7512					51.95	-57.8308	-56.8848	-58.0444	-58.1665
52	-64.1479	-64.7888	-64.6973	-64.1785					52	-57.8003	-57.0984	-58.3801	-57.9529
52.05	-63.9648	-64.9109	-64.7278	-64.1174					52.05	-57.5867	-57.1899	-58.2275	-57.8308
52.1	-63.8123	-64.6973	-64.9719	-63.7512					52.1	-57.7698	-57.1289	-58.197	-57.7087
52.15	-63.9954	-64.9414	-64.9109	-64.1479					52.15	-57.8308	-57.1289	-58.2275	-58.136
52.2	-64.1479	-64.8804	-64.9109	-64.1479					52.2	-57.9529	-56.8542	-58.136	-58.0444
52.25	-63.9648	-64.5447	-64.8804	-63.9038					52.25	-57.7698	-56.9153	-58.3191	-58.0139
52.3	-63.9954	-64.9109	-64.4836	-64.1785					52.3	-57.8003	-57.2205	-58.3191	-57.7698
52.35	-63.7512	-64.7888	-64.6973	-64.1479					52.35	-57.6477	-57.1289	-58.3801	-58.0444
52.4	-63.9954	-64.4531	-64.8193	-63.8428					52.4	-57.7393	-57.0679	-58.2581	-58.0749
52.45	-64.1174	-64.7583	-64.7888	-64.209					52.45	-57.8003	-57.0068	-58.197	-58.0749
52.5	-63.9954	-64.5752	-64.8193	-64.1174					52.5	-57.8918	-56.8542	-58.2886	-57.9224
52.55	-63.9343	-64.3616	-64.6667	-63.8428					52.55	-57.7698	-57.0374	-58.4106	-57.8613
52.6	-63.7512	-64.7278	-64.4836	-64.1785					52.6	-57.8918	-57.1594	-58.3801	-58.1055
52.65	-63.7207	-64.6057	-64.5447	-64.2395					52.65	-57.6782	-57.0679	-58.2275	-58.1055
52.7	-63.8733	-64.3921	-64.6362	-63.9343					52.7	-57.5256	-57.1594	-58.136	-58.0444
52.75	-63.8733	-64.7278	-64.7888	-64.1479					52.75	-57.7087	-56.9458	-58.3496	-58.0139
52.8	-63.7817	-64.6057	-64.6973	-64.1479					52.8	-57.9529	-56.9458	-58.5022	-57.8308
52.85	-63.6902	-64.209	-64.7583	-64.0869					52.85	-57.8308	-57.1594	-58.3191	-58.136
52.9	-63.4766	-64.5447	-64.6973	-64.0869					52.9	-57.7698	-57.1899	-58.3191	-58.0749
52.95	-63.5376	-64.5752	-64.3921	-64.1785					52.95	-57.7393	-57.0374	-58.2581	-58.2275
53	-63.6902	-64.3616	-64.6667	-64.1174					53	-57.7087	-57.0984	-58.2275	-57.9224
53.05	-63.7817	-64.3005	-64.7583	-63.8733					53.05	-57.4341	-57.0068	-58.3801	-57.9224
53.1	-63.6902	-64.5142	-64.8193	-64.1479					53.1	-57.6782	-56.9458	-58.4717	-58.1665
53.15	-63.5681	-64.4531	-64.7278	-64.1785					53.15	-57.7393	-56.9763	-58.4717	-58.2275
53.2	-63.385	-64.1785	-64.7583	-64.0259					53.2	-57.9224	-57.1594	-58.4412	-58.0749
53.25	-63.5376	-64.5447	-64.6057	-63.8428					53.25	-57.6477	-57.1289	-58.2581	-58.0444
53.3	-63.7207	-64.5142	-64.5752	-64.27					53.3	-57.6782	-57.1289	-58.1055	-57.8613
53.35	-63.6291	-64.4836	-64.6057	-64.1479					53.35	-57.6477	-57.1289	-58.4412	-58.197
53.4	-63.5071	-64.4226	-64.8804	-64.0259					53.4	-57.5561	-56.9153	-58.4717	-58.197
53.45	-63.5376	-64.6667	-64.9109	-63.9954					53.45	-57.373	-56.8237	-58.3496	-58.136
53.5	-63.3545	-64.6057	-64.9414	-64.209					53.5	-57.5867	-57.0068	-58.3496	-58.136
53.55	-63.3545	-64.3616	-64.9109	-64.209					53.55	-57.6782	-57.0984	-58.2886	-58.1055
53.6	-63.5681	-64.6362	-64.7888	-63.8428					53.6	-57.7087	-57.1289	-58.1665	-58.0139
53.65	-63.5376	-64.6057	-64.7278	-63.9648					53.65	-57.6172	-57.0068	-58.197	-58.3801
53.7	-63.5986	-64.5142	-64.6057	-64.1174					53.7	-57.5256	-57.0679	-58.3801	-58.2581
53.75	-63.5681	-64.331	-64.8193	-64.0869					53.75	-57.5256	-56.9153	-58.4412	-58.2581
53.8	-63.446	-64.5447	-64.9719	-63.8428					53.8	-57.4951	-56.7627	-58.3496	-58.0749
53.85	-63.324	-64.5447	-65.0024	-63.8733					53.85	-57.312	-56.8237	-58.2886	-58.0444
53.9	-63.4155	-64.4226	-64.9719	-63.9954					53.9	-57.4341	-57.0679	-58.197	-58.136
53.95	-63.6597	-64.1785	-64.9109	-64.0564					53.95	-57.5256	-57.0068	-58.136	-58.3801
54	-63.6902	-64.6362	-64.8804	-63.7207					54	-57.5867	-56.9153	-58.197	-58.3191
54.05	-63.5681	-64.4531	-64.9109	-63.7817					54.05	-57.4646	-56.9153	-58.3191	-58.2275
54.1	-63.5986	-64.3921	-64.7888	-63.9954					54.1	-57.373	-56.9763	-58.3801	-58.1665
54.15	-63.4766	-64.3616	-64.8804	-63.9648					54.15	-57.312	-56.8542	-58.3496	-58.1055
54.2	-63.3545	-64.6362	-65.033	-63.8123					54.2	-57.5867	-56.7322	-58.2886	-58.197
54.25	-63.2935	-64.6057	-65.0635	-63.6902					54.25	-57.4036	-56.7017	-58.2275	-58.4106
54.3	-63.4766	-64.331	-65.2466	-63.8733					54.3	-57.4036	-57.0068	-58.0444	-58.3191
54.35	-63.7207	-64.3616	-65.1855	-63.8123					54.35	-57.1899	-57.0068	-58.136	-58.3191
54.4	-63.6902	-64.6667	-65.2466	-63.7207					54.4	-57.5256	-56.9153	-58.136	-58.2886
54.45	-63.6291	-64.5752	-65.2161	-63.4766					54.45	-57.4646	-56.8848	-58.2581	-58.2275
54.5	-63.6291	-64.5142	-65.2161	-63.7817					54.5	-57.1899	-56.8848	-58.197	-58.197
54.55	-63.6597	-64.27	-65.094	-63.7207					54.55	-57.4646	-56.7017	-58.1665	-58.4717
54.6	-63.6291	-64.6057	-64.9414	-63.8123					54.6	-57.5256	-56.7322	-58.136	-58.4412
54.65	-63.4155	-64.5752	-65.094	-63.4766					54.65	-57.1899	-56.8848	-58.0749	-58.3496
54.7	-63.5376	-64.4836	-65.2161	-63.6291					54.7	-57.5256	-56.9458	-57.9529	-58.2581
54.75	-63.8123	-64.3616	-65.3381	-63.7817					54.75	-57.373	-56.7627	-57.8613	-58.2886
54.8	-63.8123	-64.6973	-65.3992	-63.7512					54.8	-57.1594	-56.7017	-57.9834	-58.136
54.85	-63.7817	-64.7583	-65.3076	-63.8123					54.85	-57.4646	-56.9763	-58.136	-58.1665
54.9	-63.6902	-64.6973	-65.2161	-63.5681					54.9	-57.3425	-56.9763	-58.0749	-58.2886
54.95	-63.7207	-64.3616	-65.1855	-63.7817					54.95	-57.3425	-56.7627	-57.9834	-58.4717
55	-63.6902	-64.6057	-65.5212	-63.9038					55	-57.4341	-56.8237	-57.9529	-58.3496
55.05	-63.5681	-64.7888	-65.5517	-63.8123					55.05	-57.1899	-56.9763	-57.7393	-58.3801
55.1	-63.446	-64.7278	-65.3686	-63.7817					55.1	-57.4951	-56.9763	-57.9834	-58.2581
55.15	-63.5681	-64.5447	-65.1245	-63.6291					55.15	-57.4341	-56.8237	-58.0444	-58.2275
55.2	-63.8428	-64.3616	-65.5823	-63.9038					55.2	-57.1594	-57.0374	-57.9529	-58.0749
55.25	-63.8733	-64.6667	-65.5212	-63.9648					55.25	-57.4341	-56.8237	-57.7087	-58.197
55.3	-63.8428	-64.7278	-65.3686	-63.9343					55.3	-57.312	-56.9763	-57.9529	-58.2581
55.35	-63.8123	-64.5752	-65.3992	-63.8428					55.35	-57.373	-56.9153	-57.9529	-58.3801
55.4	-63.7207	-64.4531	-65.4297	-63.8428					55.4	-57.4341	-56.6711	-57.7087	-58.3191
55.45	-63.7817	-64.5447	-65.3992	-64.1174					55.45	-57.1594	-57.0068	-57.8918	-58.2275
55.5	-63.7207	-64.8193	-65.3686	-64.0564					55.5	-57.5256	-57.0679	-57.8918	-58.2275
55.55	-63.5376	-64.7583	-65.5517	-64.0869					55.55	-57.4341	-56.7627	-57.7698	-58.1055
55.6	-63.385	-64.6362	-65.3686	-63.9648					55.6	-57.2205	-57.0068	-57.7393	-58.0139
55.65	-63.4766	-64.4836	-65.5212	-63.9343					55.65	-57.5561	-56.8237	-57.8308	-57.9529
55.7	-63.5986	-64.7278	-65.5517	-64.209					55.7	-57.4341	-57.0679	-57.5561	-58.0749
55.75	-63.8123	-64.8804	-65.2161	-64.1785					55.75	-57.2815	-56.9763	-57.9529	-58.2886
55.8	-63.6902	-64.7278	-65.5517	-64.1785					55.8	-57.6172	-56.7627	-57.8613	-58.2886
55.85	-63.7207	-64.6667	-65.5823	-64.0869					55.85	-57.4951	-57.0679	-57.4951	-58.1665
55.9	-63.7207	-64.5142	-65.2771	-63.9038					55.9	-57.251	-57.0068	-57.9224	-58.0749
55.95	-63.385	-64.7888	-65.6128	-64.1174					55.95	-57.5867	-56.8542	-57.8308	-58.1665
56	-63.6902	-64.8804	-65.4297	-64.2395					56	-57.5561	-57.0068	-57.7698	-58.136
56.05	-63.8123	-64.8193	-65.3076	-64.1479					56.05	-57.251	-56.7627	-57.7698	-57.9834
56.1	-63.8123	-64.7583	-65.5517	-64.3616					56.1	-57.6172	-57.0984	-57.5867	-57.8308
56.15	-63.6902	-64.6667	-65.3992	-64.0869					56.15	-57.5256	-57.0068	-57.9224	-57.9834
56.2	-63.6597	-64.8804	-65.6128	-64.0259					56.2	-57.3425	-56.6711	-57.7393	-58.0444
56.25	-63.7817	-65.0024	-65.5823	-64.331					56.25	-57.6782	-57.0374	-57.5561	-58.136
56.3	-63.7207	-65.0024	-65.4602	-64.4226					56.3	-57.5561	-57.0984	-57.8308	-58.0749
56.35	-63.5681	-65.033	-65.7043	-64.3921					56.35	-57.4341	-56.6711	-57.8003	-58.0749
56.4	-63.9038	-64.9719	-65.6128	-64.2395					56.4	-57.4341	-57.0374	-57.7698	-57.9834
56.45	-63.9038	-64.8498	-65.3992	-64.0869					56.45	-57.6477	-56.9458	-57.7698	-57.6477
56.5	-63.6597	-65.0635	-65.7654	-64.1174					56.5	-57.5867	-56.7627	-57.5561	-58.0444
56.55	-64.0564	-65.1855	-65.7654	-64.27					56.55	-57.251	-57.0984	-57.9224	-58.136
56.6	-63.9038	-65.0635	-65.4297	-64.3616					56.6	-57.6782	-56.9153	-57.8308	-58.0444
56.65	-63.6597	-65.094	-65.6433	-64.209					56.65	-57.5867	-56.8542	-57.6172	-57.7393
56.7	-64.1785	-64.9109	-65.7959	-64.1785					56.7	-57.4646	-57.0984	-57.8613	-57.9834
56.75	-64.0869	-65.0024	-65.6128	-64.1174					56.75	-57.4951	-57.0068	-57.8613	-57.9529
56.8	-63.6597	-65.3992	-65.6128	-63.9648					56.8	-57.7087	-56.9153	-57.5561	-57.8308
56.85	-63.9954	-65.3381	-65.8569	-64.1174					56.85	-57.5867	-56.8542	-57.9529	-57.8003
56.9	-63.9648	-65.2771	-65.7654	-64.2395					56.9	-57.312	-57.1289	-57.8003	-57.9224
56.95	-63.8123	-65.3076	-65.6128	-64.209					56.95	-57.5561	-57.0068	-57.6782	-57.8308
57	-63.9954	-65.155	-65.8874	-64.1479					57	-57.5561	-56.8237	-57.9224	-57.6477
57.05	-63.8123	-65.3381	-65.8874	-64.0564					57.05	-57.5256	-57.0984	-57.8003	-57.8308
57.1	-63.9038	-65.4602	-65.7959	-63.8428					57.1	-57.373	-57.0679	-57.7698	-57.6477
57.15	-64.0869	-65.4602	-65.8264	-63.8123					57.15	-57.6477	-56.8848	-57.9529	-57.6477
57.2	-63.8123	-65.4602	-66.04	-64.0259					57.2	-57.5561	-57.0984	-57.8613	-57.7087
57.25	-64.0259	-65.4297	-65.8264	-64.0869					57.25	-57.4951	-56.9763	-57.8613	-57.5867
57.3	-64.0259	-65.2771	-65.5517	-63.9954					57.3	-57.4646	-57.0679	-57.8003	-57.6477
57.35	-63.7817	-65.3076	-65.8874	-63.9648					57.35	-57.6172	-56.8848	-58.1055	-57.6782
57.4	-64.1174	-65.4907	-65.8569	-63.8428					57.4	-57.5867	-57.0984	-57.9834	-57.373
57.45	-63.9343	-65.7349	-65.7654	-63.6902					57.45	-57.5256	-57.0068	-57.7393	-57.7087
57.5	-63.6902	-65.5212	-65.5823	-63.6597					57.5	-57.5561	-56.8237	-58.0139	-57.6172
57.55	-63.8428	-65.5823	-65.8874	-63.8733					57.55	-57.6172	-57.0068	-58.0444	-57.4036
57.6	-63.9343	-65.5517	-65.9485	-63.9954					57.6	-57.6477	-57.0679	-57.8613	-57.6782
57.65	-63.8123	-65.5212	-65.7654	-64.0564					57.65	-57.312	-57.0679	-57.9224	-57.4646
57.7	-63.7207	-65.5517	-65.7349	-63.7817					57.7	-57.6172	-56.8237	-58.0749	-57.5256
57.75	-63.8733	-65.6738	-66.04	-63.9038					57.75	-57.6782	-57.1594	-58.0749	-57.5561
57.8	-63.9038	-65.8264	-65.8874	-63.8123					57.8	-57.5256	-57.0984	-57.7698	-57.4341
57.85	-63.5071	-65.7043	-65.7349	-63.6902					57.85	-57.4036	-56.9763	-58.1055	-57.5256
57.9	-63.8733	-65.6738	-65.7043	-63.7817					57.9	-57.6172	-56.9763	-58.0139	-57.5561
57.95	-63.8428	-65.6738	-65.8569	-63.8123					57.95	-57.6782	-57.1594	-57.9529	-57.373
58	-63.7817	-65.5212	-65.8264	-63.9038					58	-57.5867	-57.0679	-57.8918	-57.6172
58.05	-63.6902	-65.4297	-65.6128	-63.9954					58.05	-57.4646	-56.9153	-58.1665	-57.4951
58.1	-63.7817	-65.6738	-65.6738	-63.8428					58.1	-57.5867	-56.9763	-58.136	-57.3425
58.15	-63.7817	-65.7349	-65.918	-63.8733					58.15	-57.8003	-57.251	-57.9529	-57.4951
58.2	-63.5376	-65.7959	-65.7959	-63.9038					58.2	-57.6782	-57.0679	-58.0444	-57.5256
58.25	-63.7207	-65.7349	-65.7349	-63.8123					58.25	-57.5561	-56.8542	-58.136	-57.3425
58.3	-63.7512	-65.8264	-65.6128	-63.7207					58.3	-57.5561	-57.0374	-58.0444	-57.312
58.35	-63.6291	-65.6738	-65.918	-63.6597					58.35	-57.7087	-57.1594	-57.8308	-57.4951
58.4	-63.385	-65.5517	-65.8874	-63.8428					58.4	-57.6782	-57.0679	-58.136	-57.4341
58.45	-63.7512	-65.4907	-65.7654	-63.9648					58.45	-57.6477	-56.8237	-58.1055	-57.2205
58.5	-63.6597	-65.5823	-65.7349	-63.9648					58.5	-57.4646	-57.0068	-57.9224	-57.5256
58.55	-63.6291	-65.7349	-65.979	-63.9343					58.55	-57.7698	-57.1594	-57.8613	-57.373
58.6	-63.385	-65.7349	-65.8569	-63.8123					58.6	-57.7087	-57.1289	-58.136	-57.2205
58.65	-63.8123	-65.6433	-65.8264	-63.8123					58.65	-57.6782	-56.9763	-58.1055	-57.4036
58.7	-63.7817	-65.6128	-65.6128	-63.8733					58.7	-57.4036	-57.0374	-58.0139	-57.4951
58.75	-63.6291	-65.6433	-65.918	-63.7207					58.75	-57.6477	-57.251	-57.8613	-57.3425
58.8	-63.4766	-65.3992	-65.979	-63.6291					58.8	-57.6477	-57.0984	-58.1665	-57.251
58.85	-63.8123	-65.4297	-65.9485	-63.5986					58.85	-57.6172	-56.9763	-58.0749	-57.5256
58.9	-63.7207	-65.1855	-65.6738	-63.7817					58.9	-57.4646	-56.9153	-58.0444	-57.4341
58.95	-63.6597	-65.3686	-65.7959	-63.9343					58.95	-57.251	-57.2205	-57.8613	-57.312
59	-63.4155	-65.5823	-65.979	-63.9954					59	-57.5867	-57.0374	-58.1665	-57.4646
59.05	-63.7207	-65.5823	-65.8569	-64.0259					59.05	-57.5561	-56.9763	-58.1055	-57.4951
59.1	-63.7817	-65.4602	-65.8264	-63.9343					59.1	-57.4036	-56.8848	-58.0444	-57.4951
59.15	-63.6902	-65.5212	-65.6738	-63.9648					59.15	-57.373	-57.1594	-57.8918	-57.2205
59.2	-63.446	-65.3076	-65.8264	-63.8428					59.2	-57.2815	-57.0679	-58.0749	-57.4951
59.25	-63.7512	-65.1855	-65.8874	-63.6597					59.25	-57.5561	-57.0068	-58.1055	-57.4951
59.3	-63.9343	-65.4297	-65.7654	-63.8733					59.3	-57.4341	-56.8542	-58.0444	-57.4036
59.35	-63.8733	-65.3686	-65.5823	-64.0259					59.35	-57.4951	-56.9763	-57.8918	-57.1594
59.4	-63.6597	-65.2466	-65.4907	-63.9648					59.4	-57.4036	-57.0984	-57.8613	-57.5256
59.45	-63.6597	-65.094	-65.7043	-63.9038					59.45	-57.3425	-57.0374	-58.0749	-57.4341
59.5	-63.9954	-65.3686	-65.6128	-63.7817					59.5	-57.4951	-56.9763	-58.0139	-57.4646
59.55	-63.9343	-65.2161	-65.6738	-64.1174					59.55	-57.4646	-56.7932	-57.8918	-57.2815
59.6	-63.7817	-65.0635	-65.4602	-64.0869					59.6	-57.4646	-56.9458	-57.8613	-57.6782
59.65	-63.5681	-65.2161	-65.3076	-63.9038					59.65	-57.373	-57.0374	-58.0139	-57.5256
59.7	-63.8733	-65.2161	-65.5823	-63.9648					59.7	-57.2815	-57.0374	-58.0139	-57.5256
59.75	-63.9648	-65.094	-65.6128	-64.1785					59.75	-57.5256	-56.8848	-57.9529	-57.2815
59.8	-63.9343	-65.155	-65.5212	-64.0869					59.8	-57.5561	-56.8237	-57.8308	-57.7393
59.85	-63.8123	-65.1855	-65.3076	-63.9954					59.85	-57.4646	-57.0374	-57.8613	-57.4951
59.9	-63.7817	-64.8498	-65.094	-64.1479					59.9	-57.373	-57.0068	-58.0444	-57.6172
59.95	-64.0564	-65.1245	-65.3992	-64.0869					59.95	-57.2815	-57.0984	-57.9529	-57.3425
60	-63.9343	-65.0635	-65.4297	-63.9954					60	-57.4036	-56.8542	-57.8613	-57.7393
60.05	-63.9648	-64.6667	-65.2466	-64.2395					60.05	-57.5256	-56.7322	-57.6477	-57.5867
60.1	-63.7817	-65.0024	-65.155	-64.0259					60.1	-57.4341	-57.0068	-57.8918	-57.6172
60.15	-63.9038	-64.8193	-64.8804	-64.1479					60.15	-57.4951	-57.0984	-57.9529	-57.373
60.2	-64.1785	-64.6973	-65.1245	-64.3005					60.2	-57.4036	-56.9763	-57.8613	-57.5561
60.25	-63.9954	-64.8498	-65.2466	-63.9343					60.25	-57.2205	-56.8542	-57.7393	-57.6172
60.3	-63.9648	-64.4836	-65.155	-64.2395					60.3	-57.4036	-56.7932	-57.6477	-57.5561
60.35	-63.6902	-64.7583	-65.155	-64.209					60.35	-57.5561	-57.0068	-57.8003	-57.3425
60.4	-63.9954	-64.7278	-65.0024	-63.8733					60.4	-57.4036	-57.0679	-57.8918	-57.2815
60.45	-64.1479	-64.5142	-64.8498	-64.27					60.45	-57.4951	-57.0374	-57.7087	-57.373
60.5	-64.0869	-64.8193	-65.033	-63.9648					60.5	-57.2815	-56.9153	-57.6172	-57.2815
60.55	-63.9648	-64.6057	-65.094	-63.5681					60.55	-57.251	-56.8542	-57.4951	-57.0374
60.6	-63.9343	-64.5142	-64.9109	-63.8428					60.6	-57.373	-56.8542	-57.6477	-56.8237
60.65	-63.9648	-64.6973	-64.9109	-63.5681					60.65	-57.4951	-57.0679	-57.7087	-56.8542
60.7	-64.1785	-64.5447	-64.5752	-63.3545					60.7	-57.312	-57.0679	-57.4646	-56.8237
60.75	-64.1174	-64.5447	-64.4836	-63.446					60.75	-57.5561	-57.0984	-57.373	-56.6101
60.8	-64.1785	-64.5752	-64.6057	-63.0493					60.8	-57.373	-56.8848	-57.1899	-56.2439
60.85	-64.1174	-64.5142	-64.5752	-62.8662					60.85	-57.312	-56.7322	-57.1289	-55.9998
60.9	-63.9648	-64.5142	-64.331	-62.9272					60.9	-57.3425	-56.9763	-57.1289	-56.1218
60.95	-64.209	-64.6362	-64.2395	-62.6526					60.95	-57.4951	-57.0679	-56.9763	-55.7251
61	-64.3005	-64.5142	-63.8428	-62.1338					61	-57.5867	-56.9763	-56.9458	-55.542
61.05	-64.1785	-64.4531	-63.6597	-62.3169					61.05	-57.4646	-56.9458	-56.5491	-55.0842
61.1	-64.1479	-64.7583	-63.6597	-62.0727					61.1	-57.4951	-56.8237	-56.3354	-54.9622
61.15	-63.9954	-64.5752	-63.6291	-61.4624					61.15	-57.4341	-56.6406	-56.427	-54.9316
61.2	-64.0869	-64.3005	-63.446	-61.5234					61.2	-57.2815	-56.7932	-56.366	-54.5654
61.25	-64.3005	-64.6057	-63.2324	-61.3708					61.25	-57.312	-56.8542	-56.0608	-54.3213
61.3	-64.331	-64.5447	-63.0493	-60.9436					61.3	-57.5561	-56.7932	-55.9082	-53.9856
61.35	-64.3005	-64.209	-62.6221	-60.5469					61.35	-57.7087	-56.7627	-55.542	-53.8025
61.4	-64.209	-64.3005	-62.4084	-60.6384					61.4	-57.5561	-56.488	-55.4199	-53.6194
61.45	-64.0869	-64.1785	-62.3779	-60.3638					61.45	-57.5867	-56.366	-55.2978	-53.2837
61.5	-64.2395	-64.0564	-62.2559	-59.9365					61.5	-57.4341	-56.3049	-55.2368	-53.0395
61.55	-64.3921	-63.8428	-61.9812	-59.7229					61.55	-57.4341	-56.4575	-54.9011	-52.5513
61.6	-64.3616	-64.0564	-61.7676	-59.6008					61.6	-57.3425	-56.3965	-54.779	-52.2766
61.65	-64.331	-63.9648	-61.4929	-59.3567					61.65	-57.373	-56.2134	-54.4739	-52.124
61.7	-64.209	-63.6291	-61.2488	-58.8379					61.7	-57.5867	-56.1218	-54.1687	-51.9104
61.75	-64.1174	-63.8123	-60.9436	-58.8989					61.75	-57.6782	-55.9692	-54.1687	-51.5747
61.8	-64.1479	-63.8428	-61.0046	-58.5632					61.8	-57.6172	-55.6641	-54.1992	-51.178
61.85	-64.3005	-63.5986	-60.852	-58.2886					61.85	-57.4341	-55.6946	-53.833	-50.8118
61.9	-64.4836	-63.324	-60.6384	-57.8003					61.9	-57.4646	-55.8166	-53.6194	-50.8423
61.95	-64.3005	-63.6291	-60.4858	-57.7698					61.95	-57.4341	-55.7861	-53.3447	-50.6287
62	-64.3616	-63.446	-60.2112	-57.4341					62	-57.4341	-55.5115	-53.1006	-50.2319
62.05	-64.27	-63.2019	-59.906	-57.0068					62.05	-57.373	-55.481	-52.9175	-49.8962
62.1	-64.1479	-63.0188	-59.7534	-56.5796					62.1	-57.5867	-55.3284	-52.9175	-49.4995
62.15	-64.2395	-63.1409	-59.3567	-56.5796					62.15	-57.6782	-55.1147	-52.8259	-49.1943
62.2	-64.4226	-63.0493	-59.4482	-56.2134					62.2	-57.7087	-54.9622	-52.7039	-49.1028
62.25	-64.4531	-62.8052	-59.2346	-55.8166					62.25	-57.4951	-55.0537	-52.4597	-48.8281
62.3	-64.331	-62.7441	-59.082	-55.3894					62.3	-57.4951	-55.0537	-52.2461	-48.4314
62.35	-64.4531	-62.8357	-58.8989	-55.4199					62.35	-57.4646	-54.9927	-52.0325	-48.0957
62.4	-64.3005	-62.7441	-58.6853	-54.9622					62.4	-57.5867	-54.7485	-51.8188	-47.6074
62.45	-64.1479	-62.3779	-58.5022	-54.5044					62.45	-57.8003	-54.7485	-51.7578	-47.2717
62.5	-64.1174	-62.4695	-58.1665	-54.0771					62.5	-57.5561	-54.6265	-51.7578	-47.1802
62.55	-64.27	-62.5305	-58.0139	-54.0161					62.55	-57.6782	-54.5044	-51.5747	-46.875
62.6	-64.5142	-62.4695	-57.8613	-53.5278					62.6	-57.4036	-54.2602	-51.4526	-46.3562
62.65	-64.4836	-62.1338	-57.6782	-52.948					62.65	-57.6782	-54.2908	-51.2085	-46.0815
62.7	-64.3616	-62.2253	-57.6782	-52.2461					62.7	-57.5867	-54.4739	-51.0559	-45.5017
62.75	-64.5142	-62.2559	-57.6477	-51.9714					62.75	-57.5867	-54.3518	-50.7812	-44.9829
62.8	-64.3616	-62.1643	-57.4036	-51.2085					62.8	-57.6782	-54.1992	-50.6287	-44.8608
62.85	-64.3005	-61.8896	-57.2205	-50.354					62.85	-57.6477	-54.2297	-50.6287	-44.5251
62.9	-64.1785	-62.0422	-56.9763	-49.0723					62.9	-57.5867	-54.0161	-50.5981	-44.0674
62.95	-64.4531	-62.1338	-56.7627	-47.7905					62.95	-57.6477	-53.8635	-50.4761	-43.5181
63	-64.5752	-61.9507	-56.5491	-46.0815					63	-57.8308	-54.0771	-50.293	-43.0298
63.05	-64.5142	-61.8591	-56.3049	-42.7856					63.05	-57.4646	-53.9246	-50.1709	-42.2668
63.1	-64.4531	-61.8591	-56.366	-37.8723					63.1	-57.7087	-53.9551	-50.0793	-41.7175
63.15	-64.3616	-62.0727	-56.366	-30.6702					63.15	-57.6782	-53.5583	-49.8047	-41.2903
63.2	-64.4531	-61.9812	-56.2439	-21.759					63.2	-57.4646	-53.894	-49.6826	-40.6799
63.25	-64.3921	-61.9507	-56.0303	-10.9863					63.25	-57.7698	-53.8025	-49.7131	-39.7949
63.3	-64.209	-61.7981	-55.603	0.579834					63.3	-57.7087	-53.7109	-49.7436	-38.9099
63.35	-64.0869	-62.0117	-55.603	11.7798					63.35	-57.5561	-53.6194	-49.469	-37.8113
63.4	-64.3616	-62.0422	-55.7556	21.4844					63.4	-57.7393	-53.7415	-49.2554	-36.3769
63.45	-64.4531	-61.9812	-55.5725	28.595					63.45	-57.5867	-53.6499	-49.0112	-34.729
63.5	-64.4836	-61.7981	-55.3284	32.8979					63.5	-57.7698	-53.6499	-49.1943	-32.959
63.55	-64.5447	-61.9812	-55.2673	33.8135					63.55	-57.8613	-53.7415	-49.0112	-30.5176
63.6	-64.4836	-62.1033	-55.2978	31.3721					63.6	-57.4951	-53.4668	-48.7976	-26.8555
63.65	-64.4836	-62.1033	-55.2063	25.9094					63.65	-57.7698	-53.6804	-48.5229	-21.8811
63.7	-64.3921	-62.0422	-54.9316	17.6392					63.7	-57.6477	-53.6804	-48.7976	-15.625
63.75	-64.331	-61.7981	-55.2368	7.96509					63.75	-57.7698	-53.3752	-48.584	-8.05664
63.8	-64.27	-62.1338	-55.0842	-2.89917					63.8	-57.8003	-53.5583	-48.1873	0.823975
63.85	-64.1479	-62.2559	-54.9622	-14.2212					63.85	-57.5256	-53.4973	-48.4619	10.2844
63.9	-64.209	-62.3169	-55.2368	-25.4822					63.9	-57.8308	-53.4973	-48.3704	19.8669
63.95	-64.27	-62.1643	-55.0537	-36.6516					63.95	-57.8918	-53.5889	-48.0957	28.8086
64	-64.3005	-62.1643	-54.9622	-47.1191					64	-57.5561	-53.2837	-48.2788	37.2925
64.05	-64.4226	-62.4695	-55.3894	-56.5186					64.05	-57.8613	-53.6499	-48.0041	44.5862
64.1	-64.27	-62.6221	-55.2978	-64.9109					64.1	-57.8003	-53.6194	-47.9736	50.5676
64.15	-64.2395	-62.5305	-55.4199	-72.2961					64.15	-57.5867	-53.3142	-48.0347	55.2063
64.2	-64.1785	-62.5305	-55.5725	-78.6743					64.2	-58.0139	-53.5583	-47.76	58.3801
64.25	-63.9954	-62.561	-55.481	-84.1064					64.25	-57.7698	-53.4058	-48.0347	59.9365
64.3	-64.331	-62.8662	-55.9692	-88.6841					64.3	-57.5867	-53.5889	-47.9736	59.7839
64.35	-64.2395	-62.8967	-56.1523	-92.0715					64.35	-57.9529	-53.5278	-47.76	58.136
64.4	-64.1785	-62.9578	-56.1218	-94.7876					64.4	-57.8918	-53.2532	-47.9736	55.1758
64.45	-64.0564	-62.8357	-56.6101	-96.6797					64.45	-57.5867	-53.5889	-47.8516	50.7202
64.5	-64.0259	-62.9883	-56.7932	-97.9004					64.5	-57.8613	-53.6194	-47.9431	44.9219
64.55	-64.27	-63.324	-57.0984	-98.9075					64.55	-57.8918	-53.3142	-47.9431	37.8723
64.6	-64.0564	-63.385	-57.4341	-99.3652					64.6	-57.7698	-53.6194	-47.6074	30.2124
64.65	-63.8123	-63.446	-57.6172	-99.4873					64.65	-57.7087	-53.5889	-47.9126	22.1558
64.7	-64.1785	-63.3545	-58.2275	-99.2432					64.7	-57.8918	-53.4973	-47.76	13.9465
64.75	-64.0564	-63.3545	-58.4717	-98.8769					64.75	-57.9224	-53.6194	-47.7295	5.61523
64.8	-63.7512	-63.7512	-58.6548	-98.053					64.8	-57.6172	-53.6499	-47.7295	-2.19726
64.85	-64.0259	-63.8123	-59.2041	-97.1985					64.85	-57.8918	-53.4973	-47.6074	-9.82666
64.9	-64.0564	-63.8123	-59.6619	-96.283					64.9	-57.8613	-53.8025	-47.821	-17.3645
64.95	-63.8123	-63.8428	-59.9365	-95.459					64.95	-57.6782	-53.772	-47.821	-24.1089
65	-64.1174	-63.7817	-60.4248	-94.7266					65	-57.8308	-53.5278	-47.5464	-30.1819
65.05	-64.0259	-63.9343	-61.0352	-93.75					65.05	-57.8003	-53.9246	-47.9431	-35.8276
65.1	-63.7512	-64.3005	-61.3403	-92.7429					65.1	-57.7698	-53.833	-47.8516	-41.5344
65.15	-64.0259	-64.3616	-61.7981	-91.8884					65.15	-57.6172	-53.5583	-47.7295	-46.3562
65.2	-63.9038	-64.5142	-62.5915	-90.8813					65.2	-57.8613	-53.894	-47.8821	-50.8423
65.25	-63.7512	-64.4836	-63.0188	-89.8132					65.25	-57.7393	-53.9246	-47.9431	-54.9011
65.3	-63.9343	-64.3005	-63.2629	-88.7756					65.3	-57.6782	-53.894	-47.821	-59.1431
65.35	-63.8428	-64.5447	-63.9954	-87.8601					65.35	-57.7698	-53.8025	-48.1567	-62.5
65.4	-63.8123	-64.8804	-64.5752	-87.1277					65.4	-57.8308	-54.1077	-48.0041	-65.4602
65.45	-63.9038	-64.9719	-64.8804	-86.4258					65.45	-57.7087	-54.0466	-48.0347	-68.6645
65.5	-63.5376	-64.9719	-65.155	-85.5713					65.5	-57.4951	-53.9551	-48.1567	-71.1365
65.55	-63.9343	-65.0024	-65.9485	-84.6863					65.55	-57.8613	-54.1687	-48.3398	-73.1506
65.6	-63.8123	-64.8804	-66.2842	-83.8318					65.6	-57.7698	-54.1992	-48.2483	-75.4089
65.65	-63.5681	-64.9109	-66.4368	-83.0688					65.65	-57.7087	-54.1382	-48.2483	-76.9958
65.7	-63.9038	-65.3076	-67.0166	-82.2143					65.7	-57.4341	-54.3213	-48.7061	-78.2471
65.75	-63.8123	-65.4297	-67.4133	-81.3293					65.75	-57.8613	-54.4128	-48.7061	-79.834
65.8	-63.6902	-65.4297	-67.749	-80.6885					65.8	-57.7393	-54.3518	-48.5535	-80.5359
65.85	-63.7817	-65.5823	-67.8101	-80.0476					65.85	-57.7087	-54.2602	-48.9502	-80.9936
65.9	-63.7207	-65.4602	-68.3899	-79.4983					65.9	-57.5867	-54.6875	-49.0417	-82.0618
65.95	-63.6902	-65.4297	-68.6951	-79.01					65.95	-57.8613	-54.5044	-49.0417	-82.3669
66	-63.6902	-65.6433	-68.9697	-78.3691					66	-57.7087	-54.5044	-49.2249	-82.3669
66.05	-63.8123	-65.8874	-68.9697	-77.7588					66.05	-57.6477	-54.6265	-49.3774	-82.7942
66.1	-63.6902	-66.1011	-69.3359	-77.0264					66.1	-57.5867	-54.9011	-49.53	-82.7637
66.15	-63.5071	-65.918	-69.6411	-76.5381					66.15	-57.9834	-54.7485	-49.4995	-82.428
66.2	-63.8733	-65.979	-69.7632	-75.8972					66.2	-57.7393	-54.5959	-49.8352	-82.5195
66.25	-63.7207	-65.9485	-69.8547	-75.3784					66.25	-57.6172	-54.8706	-49.9268	-82.2143
66.3	-63.5071	-65.7959	-70.282	-74.7986					66.3	-57.5561	-55.0537	-49.9878	-81.6955
66.35	-63.6902	-66.0095	-70.282	-74.3713					66.35	-57.9224	-54.9622	-50.2319	-81.5735
66.4	-63.8428	-66.1621	-70.3735	-74.0967					66.4	-57.7393	-54.8096	-50.4456	-80.9936
66.45	-63.7512	-66.1621	-70.3125	-73.7915					66.45	-57.6172	-55.2978	-50.5981	-80.4443
66.5	-63.385	-66.3452	-70.7397	-73.4558					66.5	-57.5561	-55.2978	-50.5981	-79.895
66.55	-63.7207	-66.2537	-70.8313	-73.0286					66.55	-57.9224	-55.1147	-51.0254	-79.5288
66.6	-63.5376	-66.4062	-70.8618	-72.6929					66.6	-57.7393	-55.0842	-51.0559	-78.7353
66.65	-63.446	-66.4062	-70.8618	-72.3877					66.65	-57.6782	-55.4504	-51.178	-77.8809
66.7	-63.385	-66.1926	-71.1975	-72.1741					66.7	-57.5561	-55.542	-51.1475	-77.5757
66.75	-63.5681	-66.2842	-71.1365	-71.6858					66.75	-57.8613	-55.4504	-51.6968	-76.8738
66.8	-63.5071	-66.4062	-71.1975	-71.3196					66.8	-57.8613	-55.3589	-51.6357	-76.0803
66.85	-63.4766	-66.4978	-71.1059	-70.9534					66.85	-57.7393	-55.7556	-51.8188	-75.2869
66.9	-63.324	-66.6504	-71.2891	-70.6177					66.9	-57.6172	-55.7556	-51.9714	-74.8901
66.95	-63.6902	-66.5283	-71.3196	-70.5566					66.95	-57.8613	-55.6335	-52.4597	-74.0662
67	-63.5681	-66.4978	-71.167	-70.404					67	-57.9224	-55.5115	-52.3071	-73.3337
67.05	-63.4766	-66.4673	-70.9839	-70.2515					67.05	-57.8308	-55.9692	-52.4597	-72.5403
67.1	-63.4766	-66.3452	-70.8313	-70.1294					67.1	-57.7087	-55.9387	-52.6428	-72.2656
67.15	-63.6597	-66.3757	-71.167	-69.8852					67.15	-57.7393	-55.8472	-53.1006	-71.5027
67.2	-63.5071	-66.2842	-71.1365	-69.6106					67.2	-57.9529	-55.7251	-53.0701	-70.7397
67.25	-63.446	-66.4368	-70.8923	-69.397					67.25	-57.8918	-56.0913	-53.1616	-70.0989
67.3	-63.4155	-66.6504	-70.7397	-69.2444					67.3	-57.8003	-56.1829	-53.3142	-69.7327
67.35	-63.6597	-66.7419	-70.7703	-68.9392					67.35	-57.8003	-56.1218	-53.6804	-69.1223
67.4	-63.5376	-66.7114	-70.8618	-68.634					67.4	-57.6782	-56.0608	-53.7109	-68.4509
67.45	-63.4155	-66.6504	-70.6787	-68.2678					67.45	-58.0139	-56.3354	-53.7109	-67.7795
67.5	-63.3545	-66.4673	-70.5872	-67.9626					67.5	-57.8613	-56.3965	-53.894	-67.5964
67.55	-63.6291	-66.4673	-70.343	-67.7185					67.55	-57.9224	-56.366	-54.3823	-66.925
67.6	-63.4766	-66.7725	-70.3735	-67.7185					67.6	-57.7393	-56.3049	-54.2908	-66.3757
67.65	-63.5071	-66.6504	-70.3735	-67.4438					67.65	-57.7087	-56.3354	-54.3823	-65.7654
67.7	-63.324	-66.4673	-70.282	-67.1081					67.7	-58.0139	-56.6406	-54.4128	-65.5823
67.75	-63.6291	-66.2231	-70.0073	-66.7725					67.75	-57.9529	-56.5186	-54.9316	-65.033
67.8	-63.5986	-66.6504	-69.8242	-66.3757					67.8	-57.8918	-56.5796	-54.8706	-64.4226
67.85	-63.5986	-66.5588	-70.0684	-66.4673					67.85	-57.7087	-56.4575	-55.0232	-63.8123
67.9	-63.324	-66.4368	-70.0073	-66.1316					67.9	-57.7698	-56.6711	-54.9927	-63.6597
67.95	-63.5071	-66.3757	-69.9463	-65.9485					67.95	-58.1055	-56.7627	-55.481	-63.2019
68	-63.7207	-66.6504	-69.6716	-65.5517					68	-57.8918	-56.7932	-55.5725	-62.6831
68.05	-63.5376	-66.4978	-69.519	-65.5517					68.05	-57.8308	-56.8542	-55.6641	-61.9507
68.1	-63.385	-66.3452	-69.6716	-65.3076					68.1	-57.8003	-56.6406	-55.6946	-61.7065
68.15	-63.385	-66.5588	-69.6716	-64.8498					68.15	-57.7698	-56.9153	-55.7861	-61.4319
68.2	-63.5681	-66.4673	-69.5801	-64.9109					68.2	-57.9529	-57.0374	-56.1829	-60.852
68.25	-63.5376	-66.4062	-69.3054	-64.6973					68.25	-57.9834	-57.0374	-56.2439	-60.3638
68.3	-63.5681	-66.4978	-69.0002	-64.3005					68.3	-57.8308	-56.9763	-56.366	-59.8144
68.35	-63.4766	-66.1926	-69.2139	-64.1174					68.35	-57.8308	-56.8237	-56.366	-59.5703
68.4	-63.4766	-66.4062	-69.2139	-64.0564					68.4	-57.5867	-57.1594	-56.5186	-59.1125
68.45	-63.6291	-66.3452	-69.0918	-63.6291					68.45	-57.7698	-57.2815	-56.8542	-58.7158
68.5	-63.5986	-65.979	-68.8782	-63.5681					68.5	-57.8918	-57.2815	-56.8848	-58.1665
68.55	-63.6291	-66.4368	-68.7256	-63.385					68.55	-57.8308	-57.1594	-56.9763	-57.7698
68.6	-63.385	-66.1926	-68.573	-63.0493					68.6	-57.7393	-57.0068	-56.8237	-57.4951
68.65	-63.5071	-66.2842	-68.634	-62.9272					68.65	-57.6477	-57.4036	-57.2205	-56.9763
68.7	-63.5376	-66.2537	-68.6035	-62.6526					68.7	-57.5256	-57.4951	-57.4341	-56.6406
68.75	-63.5681	-65.979	-68.512	-62.1948					68.75	-57.8613	-57.4036	-57.5256	-56.0303
68.8	-63.5681	-66.2842	-68.4204	-62.2864					68.8	-57.7698	-57.4951	-57.5561	-55.8166
68.85	-63.4155	-66.1621	-68.1763	-62.0117					68.85	-57.7393	-57.373	-57.4646	-55.542
68.9	-63.446	-65.918	-68.0237	-61.4014					68.9	-57.7698	-57.4341	-57.7698	-55.0537
68.95	-63.6291	-66.1011	-68.1152	-61.3403					68.95	-57.6172	-57.6782	-58.0444	-54.6265
69	-63.6902	-65.979	-68.0847	-61.0657					69	-57.5561	-57.6172	-57.9529	-54.0771
69.05	-63.6291	-65.5823	-67.9016	-60.4248					69.05	-57.6782	-57.7087	-58.0749	-53.9856
69.1	-63.5376	-65.918	-67.7795	-60.3943					69.1	-57.8613	-57.5867	-58.0444	-53.8025
69.15	-63.4766	-65.7959	-67.5049	-59.9976					69.15	-57.8003	-57.4951	-58.1665	-53.1921
69.2	-63.7207	-65.5517	-67.2302	-59.5703					69.2	-57.7087	-57.7393	-58.3801	-52.7954
69.25	-63.8428	-65.6433	-67.4744	-59.3262					69.25	-57.7087	-57.9224	-58.4717	-52.3682
69.3	-63.6291	-65.7043	-67.3218	-59.021					69.3	-57.4951	-57.8003	-58.5632	-52.3071
69.35	-63.446	-65.3686	-67.1081	-58.5022					69.35	-57.6172	-57.8308	-58.5937	-51.9714
69.4	-63.385	-65.5823	-67.0776	-57.9224					69.4	-57.7393	-57.7393	-58.3496	-51.5442
69.45	-63.446	-65.4602	-66.925	-57.8613					69.45	-57.8003	-57.7698	-58.7158	-51.1169
69.5	-63.7512	-65.1855	-66.6199	-57.4036					69.5	-57.6782	-57.9224	-58.9905	-50.7202
69.55	-63.5986	-65.3992	-66.7419	-56.5796					69.55	-57.8003	-58.0749	-58.8684	-50.4456
69.6	-63.5681	-65.2161	-66.7725	-56.2134					69.6	-57.6172	-57.9224	-58.8379	-50.1709
69.65	-63.5376	-65.094	-66.7419	-55.8777					69.65	-57.4951	-58.1055	-58.8684	-49.6521
69.7	-63.385	-64.9719	-66.6199	-55.2673					69.7	-57.5256	-57.9529	-58.9294	-49.3774
69.75	-63.6291	-65.155	-66.4978	-54.4739					69.75	-57.7698	-57.8613	-59.2041	-48.8281
69.8	-63.6597	-65.033	-66.2231	-53.9551					69.8	-57.8308	-58.0139	-59.2957	-48.4314
69.85	-63.6902	-64.6667	-65.979	-53.1616					69.85	-57.7087	-58.2886	-59.2041	-48.2483
69.9	-63.6902	-64.9109	-65.9485	-52.2461					69.9	-57.6782	-58.197	-59.2957	-47.9431
69.95	-63.5986	-64.8498	-66.1316	-50.8118					69.95	-57.7087	-58.2275	-59.2346	-47.4853
70	-63.385	-64.6667	-66.1621	-49.53					70	-57.6477	-58.197	-59.1736	-46.875
70.05	-63.5986	-64.5447	-65.979	-47.1191					70.05	-57.5256	-58.1665	-59.4482	-46.3562
70.1	-63.6902	-64.8498	-65.979	-43.5791					70.1	-57.6172	-58.136	-59.7229	-46.2952
70.15	-63.7207	-64.6973	-65.7959	-38.0859					70.15	-57.8308	-58.2886	-59.4788	-45.8679
70.2	-63.5681	-64.4531	-65.5212	-30.7007					70.2	-57.8308	-58.4717	-59.5703	-45.4102
70.25	-63.4766	-64.5142	-65.4297	-21.1487					70.25	-57.8003	-58.4717	-59.5398	-44.8608
70.3	-63.446	-64.6057	-65.3992	-10.2539					70.3	-57.7698	-58.3496	-59.4177	-44.4336
70.35	-63.385	-64.5142	-65.6128	0.976562					70.35	-57.7698	-58.3496	-59.5703	-43.7927
70.4	-63.5986	-64.1479	-65.3686	11.0779					70.4	-57.7393	-58.2886	-59.7229	-43.396
70.45	-63.6902	-64.4836	-65.2771	19.8364					70.45	-57.6172	-58.2886	-59.7839	-43.0908
70.5	-63.6597	-64.3616	-65.155	26.0315					70.5	-57.6172	-58.4106	-59.8755	-42.4194
70.55	-63.7512	-64.2395	-65.094	29.3274					70.55	-57.8613	-58.5632	-59.8755	-41.626
70.6	-63.5986	-64.1174	-64.9109	28.9001					70.6	-57.8918	-58.5937	-59.7229	-40.741
70.65	-63.5376	-64.3921	-64.7583	25.5737					70.65	-57.8613	-58.5937	-59.6924	-39.7034
70.7	-63.4766	-64.331	-64.6667	19.5923					70.7	-57.8613	-58.5632	-59.845	-38.8489
70.75	-63.6597	-64.1785	-64.8193	11.6272					70.75	-57.8003	-58.5327	-59.967	-37.8113
70.8	-63.6902	-64.1479	-64.8193	1.89209					70.8	-57.7698	-58.4717	-60.0891	-36.3159
70.85	-63.5986	-64.3616	-64.8193	-8.57544					70.85	-57.9834	-58.3801	-59.9976	-34.3933
70.9	-63.5986	-64.331	-64.6973	-19.2566					70.9	-57.8918	-58.4106	-60.1196	-32.196
70.95	-63.5986	-64.0869	-64.6362	-29.9072					70.95	-57.9224	-58.5937	-60.0891	-28.9001
71	-63.5071	-64.0564	-64.6362	-40.0085					71	-57.7087	-58.6853	-60.0281	-24.6582
71.05	-63.3545	-64.3005	-64.5142	-49.8962					71.05	-58.0749	-58.6243	-59.967	-19.4092
71.1	-63.5071	-64.2395	-64.3005	-58.6853					71.1	-57.9529	-58.5937	-60.0891	-12.97
71.15	-63.6902	-63.9343	-64.0869	-66.5893					71.15	-57.7393	-58.5632	-60.3027	-5.09643
71.2	-63.8123	-63.8733	-64.0869	-73.3642					71.2	-58.0444	-58.3496	-60.2722	3.41797
71.25	-63.7207	-64.1174	-64.209	-79.3152					71.25	-57.9834	-58.5632	-60.2722	12.3596
71.3	-63.6291	-64.0259	-64.27	-84.5032					71.3	-57.8613	-58.6853	-60.3332	21.0876
71.35	-63.6597	-63.9954	-64.209	-88.5315					71.35	-58.0749	-58.6243	-60.2417	29.541
71.4	-63.5986	-63.7817	-64.1479	-91.8579					71.4	-58.0139	-58.5327	-60.1807	36.8957
71.45	-63.4766	-64.1174	-64.1174	-94.0857					71.45	-57.7087	-58.3801	-59.9976	42.9993
71.5	-63.385	-64.0564	-63.9343	-95.7947					71.5	-58.0444	-58.5937	-60.3332	47.9736
71.55	-63.5376	-63.9648	-63.7817	-97.229					71.55	-57.9529	-58.5937	-60.3943	51.7883
71.6	-63.6902	-63.7207	-64.0259	-98.1445					71.6	-57.8918	-58.4717	-60.3332	54.3213
71.65	-63.7817	-64.0564	-64.1785	-98.3581					71.65	-58.0139	-58.5022	-60.3332	55.4199
71.7	-63.7207	-64.1174	-63.9648	-98.3276					71.7	-57.8003	-58.6243	-60.3332	55.0232
71.75	-63.6902	-63.9954	-63.7512	-97.7783					71.75	-58.0444	-58.5327	-60.1807	53.5583
71.8	-63.9038	-63.8123	-63.6597	-97.3816					71.8	-57.9224	-58.4106	-60.4248	50.8118
71.85	-63.8428	-63.7817	-63.8733	-97.1374					71.85	-57.7087	-58.6853	-60.3638	46.9055
71.9	-63.7817	-64.0869	-63.7817	-96.4355					71.9	-57.9224	-58.5632	-60.4553	41.687
71.95	-63.6291	-63.9954	-63.446	-95.4895					71.95	-57.8613	-58.4412	-60.2112	35.7666
72	-63.8123	-64.0259	-63.6597	-94.6045					72	-57.8613	-58.5632	-60.4858	29.0832
72.05	-63.9038	-63.6902	-63.5986	-93.6584					72.05	-57.8308	-58.4717	-60.3943	22.1863
72.1	-64.0564	-64.0869	-63.3545	-92.5293					72.1	-57.6172	-58.5327	-60.2722	14.8621
72.15	-64.1174	-64.1785	-63.5071	-91.7664					72.15	-57.9224	-58.5327	-60.4553	7.56836
72.2	-64.1174	-64.0564	-63.4155	-90.9119					72.2	-57.9224	-58.2886	-60.4248	0.427246
72.25	-64.1174	-64.0564	-63.2324	-89.9353					72.25	-57.5256	-58.6548	-60.2112	-6.40869
72.3	-64.1479	-63.9038	-63.5376	-88.9282					72.3	-57.9834	-58.3496	-60.6079	-13.0615
72.35	-64.0869	-64.209	-63.385	-87.8296					72.35	-57.7393	-58.3496	-60.3943	-19.0735
72.4	-64.0564	-64.1479	-62.9883	-86.6699					72.4	-57.5867	-58.4717	-60.2417	-24.8718
72.45	-64.0259	-64.0869	-63.3545	-85.7544					72.45	-57.9834	-58.2581	-60.5164	-30.3345
72.5	-64.1479	-64.0564	-63.2019	-85.1135					72.5	-57.8003	-58.5022	-60.4248	-35.4919
72.55	-64.3921	-63.8428	-63.1409	-84.3506					72.55	-57.5867	-58.5022	-60.3332	-40.0391
72.6	-64.3616	-64.2395	-63.2935	-83.3435					72.6	-57.9224	-58.1665	-60.4858	-44.4336
72.65	-64.331	-64.1785	-63.0188	-82.489					72.65	-57.8613	-58.4717	-60.1807	-48.3398
72.7	-64.1479	-64.1785	-63.2629	-81.7566					72.7	-57.4951	-58.2886	-60.6689	-52.0935
72.75	-64.1785	-64.0869	-63.2324	-80.8105					72.75	-57.8613	-58.3801	-60.4248	-55.3894
72.8	-64.3005	-63.9648	-62.9883	-80.0781					72.8	-57.8003	-58.4106	-60.2112	-58.5632
72.85	-64.2395	-64.209	-63.3545	-79.5288					72.85	-57.5867	-58.2275	-60.4248	-61.2488
72.9	-64.1174	-64.3616	-63.385	-78.9795					72.9	-57.8308	-58.4717	-60.4248	-63.9343
72.95	-64.2395	-64.27	-63.1714	-78.3386					72.95	-57.8308	-58.2886	-60.3638	-66.0705
73	-64.3005	-64.27	-63.446	-77.5146					73	-57.7393	-58.1665	-60.4248	-68.1457
73.05	-64.209	-64.0869	-63.4155	-76.8433					73.05	-57.6172	-58.4717	-60.0891	-70.1904
73.1	-64.2395	-64.209	-63.2629	-76.2329					73.1	-57.8308	-58.3191	-60.5774	-71.7773
73.15	-64.331	-64.4226	-63.6291	-75.531					73.15	-57.7393	-58.1055	-60.3332	-73.0591
73.2	-64.2395	-64.3921	-63.446	-75.1953					73.2	-57.5867	-58.3801	-60.1807	-74.1882
73.25	-64.1785	-64.4226	-63.324	-74.7986					73.25	-57.8918	-58.4106	-60.4248	-74.9206
73.3	-64.3921	-64.2395	-63.6291	-74.3103					73.3	-57.7393	-58.1665	-60.3943	-75.7141
73.35	-64.331	-64.0564	-63.6291	-73.8525					73.35	-57.6782	-58.3191	-60.1807	-76.416
73.4	-64.2395	-64.3921	-63.324	-73.4558					73.4	-57.7698	-58.3801	-60.5469	-76.6601
73.45	-64.3921	-64.5447	-63.6291	-72.937					73.45	-57.8613	-58.3191	-60.2722	-76.8433
73.5	-64.209	-64.5142	-63.6597	-72.3877					73.5	-57.8918	-58.2275	-60.1807	-77.1179
73.55	-64.3005	-64.4531	-63.5986	-72.0825					73.55	-57.5561	-58.5327	-60.3638	-77.24
73.6	-64.4531	-64.5142	-63.6597	-71.8994					73.6	-57.9224	-58.4106	-60.3027	-77.0874
73.65	-64.0869	-64.4226	-63.8123	-71.6247					73.65	-57.8918	-58.1665	-60.1196	-76.5686
73.7	-64.3921	-64.5752	-63.6902	-71.3196					73.7	-57.8308	-58.4717	-60.4553	-76.8127
73.75	-64.4226	-64.7278	-63.5986	-71.0144					73.75	-57.7393	-58.3801	-60.3943	-76.2939
73.8	-64.0869	-64.6057	-63.9954	-70.7397					73.8	-58.0749	-58.2886	-60.0586	-75.7751
73.85	-64.4531	-64.6667	-63.9343	-70.343					73.85	-57.8918	-58.3496	-60.3638	-75.592
73.9	-64.4226	-64.4836	-63.7817	-69.9768					73.9	-57.8308	-58.5632	-60.3332	-75.0732
73.95	-64.1785	-64.331	-63.9038	-69.6411					73.95	-57.8308	-58.3801	-60.1807	-74.4018
74	-64.5752	-64.4836	-64.1174	-69.519					74	-58.136	-58.197	-60.2112	-74.0967
74.05	-64.4531	-64.6667	-64.1479	-69.458					74.05	-57.9529	-58.5937	-60.3027	-73.5168
74.1	-64.0869	-64.6057	-63.9343	-69.3664					74.1	-57.8308	-58.4717	-60.3332	-72.6623
74.15	-64.4836	-64.5447	-64.2395	-69.1528					74.15	-57.9834	-58.4106	-60.1196	-72.4182
74.2	-64.3616	-64.4836	-64.4226	-69.0002					74.2	-58.1055	-58.3496	-60.3638	-71.7773
74.25	-64.0869	-64.4836	-64.3921	-68.7866					74.25	-58.0139	-58.5632	-60.2417	-70.9228
74.3	-64.3921	-64.3921	-64.27	-68.4814					74.3	-57.8308	-58.5632	-60.1196	-70.6482
74.35	-64.3005	-64.5447	-64.6667	-68.2983					74.35	-58.0139	-58.3496	-60.2417	-70.0073
74.4	-64.1479	-64.6973	-64.6973	-68.0237					74.4	-58.1665	-58.5022	-60.3027	-69.0613
74.45	-64.3005	-64.6057	-64.6973	-67.749					74.45	-58.0444	-58.5937	-60.2112	-68.8171
74.5	-64.4226	-64.6057	-64.6362	-67.688					74.5	-57.8003	-58.5022	-60.0281	-68.1457
74.55	-64.331	-64.6362	-64.9414	-67.5659					74.55	-58.1055	-58.1665	-60.3027	-67.2607
74.6	-64.2395	-64.3616	-64.9109	-67.4744					74.6	-58.2275	-58.5937	-60.2112	-66.8945
74.65	-64.5752	-64.27	-64.8804	-67.2913					74.65	-58.1055	-58.5327	-60.0586	-66.2842
74.7	-64.4226	-64.4836	-64.8193	-66.9861					74.7	-57.8918	-58.4717	-60.1196	-65.6738
74.75	-64.209	-64.6057	-65.1245	-66.7419					74.75	-58.0749	-58.2886	-60.2112	-65.1855
74.8	-64.3921	-64.6057	-65.0635	-66.5588					74.8	-58.197	-58.5937	-60.1501	-64.7278
74.85	-64.5447	-64.4836	-65.0635	-66.2537					74.85	-58.0444	-58.4106	-59.906	-64.0869
74.9	-64.4531	-64.6362	-64.9414	-66.04					74.9	-57.9834	-58.4106	-60.1196	-63.4155
74.95	-64.0564	-64.4836	-65.3381	-65.6433					74.95	-58.0444	-58.2275	-60.1196	-63.2324
75	-64.4531	-64.4531	-65.2466	-65.3381					75	-58.197	-58.5327	-60.0281	-62.5305
75.05	-64.5142	-64.27	-65.2466	-65.1855					75.05	-58.0749	-58.4412	-59.7839	-62.0422
75.1	-64.4226	-64.5142	-65.1855	-65.1245					75.1	-58.0139	-58.3801	-60.1196	-61.5845
75.15	-64.1479	-64.6667	-65.3686	-64.8498					75.15	-57.9529	-58.197	-59.9976	-61.2793
75.2	-64.5142	-64.6362	-65.4297	-64.6667					75.2	-58.1055	-58.4412	-59.967	-60.791
75.25	-64.5142	-64.5752	-65.4907	-64.3921					75.25	-58.0444	-58.3801	-59.6619	-60.0586
75.3	-64.5752	-64.5447	-65.2466	-64.1479					75.3	-58.1055	-58.3496	-60.0891	-59.845
75.35	-64.3005	-64.5142	-65.5212	-63.8733					75.35	-57.8613	-58.136	-59.906	-59.5398
75.4	-64.6362	-64.4531	-65.6433	-63.6291					75.4	-58.0444	-58.4412	-59.845	-59.021
75.45	-64.6057	-64.3921	-65.6128	-63.2935					75.45	-58.0749	-58.4106	-59.6619	-58.4412
75.5	-64.5752	-64.1785	-65.4602	-63.1409					75.5	-58.1665	-58.4412	-59.967	-58.3801
75.55	-64.3005	-64.4226	-65.5212	-62.8357					75.55	-57.9834	-58.1055	-59.845	-57.9224
75.6	-64.5447	-64.5447	-65.8264	-62.561					75.6	-57.8003	-58.3496	-59.7534	-57.4341
75.65	-64.5752	-64.6057	-65.6738	-62.4084					75.65	-58.0749	-58.4106	-59.5093	-57.0374
75.7	-64.5142	-64.5142	-65.6738	-62.2864					75.7	-58.0749	-58.3801	-59.8144	-56.9153
75.75	-64.2395	-64.5752	-65.5212	-62.3779					75.75	-58.1055	-58.136	-59.7839	-56.6101
75.8	-64.5142	-64.6057	-65.7959	-62.2864					75.8	-57.9529	-58.3191	-59.7839	-56.1829
75.85	-64.5752	-64.2395	-65.8264	-62.0422					75.85	-57.8003	-58.5937	-59.3872	-55.6335
75.9	-64.6057	-64.5142	-65.7959	-61.8896					75.9	-58.136	-58.4412	-59.7534	-55.6335
75.95	-64.3616	-64.5752	-65.6433	-61.7981					75.95	-58.0444	-58.3191	-59.7229	-55.3589
76	-64.4836	-64.6057	-65.5517	-61.4929					76	-57.9529	-58.197	-59.6619	-54.8706
76.05	-64.6362	-64.4531	-65.7959	-61.3403					76.05	-57.8613	-58.5022	-59.3872	-54.3213
76.1	-64.6057	-64.4226	-65.7959	-61.4014					76.1	-57.8613	-58.5327	-59.5703	-54.2908
76.15	-64.5142	-64.5752	-65.7654	-61.3098					76.15	-58.1665	-58.4412	-59.7229	-53.9856
76.2	-64.3616	-64.6057	-65.6128	-61.1267					76.2	-58.0444	-58.2886	-59.5703	-53.5583
76.25	-64.6667	-64.3616	-65.5517	-60.7605					76.25	-58.0749	-58.2886	-59.5093	-53.0701
76.3	-64.5752	-64.6973	-65.8264	-61.0657					76.3	-57.9529	-58.6243	-59.2957	-52.9785
76.35	-64.5142	-64.6362	-65.8569	-61.0046					76.35	-57.8308	-58.4106	-59.6313	-52.948
76.4	-64.27	-64.3921	-65.8874	-60.8215					76.4	-58.0444	-58.4412	-59.5398	-52.4902
76.45	-64.4531	-64.6667	-65.5517	-60.5774					76.45	-58.0749	-58.197	-59.5093	-52.1851
76.5	-64.6057	-64.6057	-65.6433	-60.73					76.5	-58.0139	-58.3801	-59.2651	-51.7883
76.55	-64.6057	-64.27	-65.8569	-60.6384					76.55	-57.9834	-58.4412	-59.4177	-51.8799
76.6	-64.4531	-64.6667	-65.8874	-60.3332					76.6	-57.7393	-58.3496	-59.4482	-51.5137
76.65	-64.2395	-64.6057	-65.7043	-60.4553					76.65	-57.8308	-58.3496	-59.3872	-51.239
76.7	-64.5447	-64.331	-65.5823	-60.2112					76.7	-58.0444	-58.1665	-59.3262	-50.7812
76.75	-64.5142	-64.5447	-65.3992	-59.9976					76.75	-58.0139	-58.2275	-59.082	-50.8728
76.8	-64.5447	-64.4226	-65.6738	-60.1501					76.8	-57.9224	-58.4412	-59.2346	-50.6592
76.85	-64.209	-64.4836	-65.7349	-59.8755					76.85	-57.8308	-58.2886	-59.3567	-50.415
76.9	-64.1174	-64.5447	-65.7043	-59.6008					76.9	-57.6782	-58.2886	-59.2346	-50.1709
76.95	-64.4226	-64.331	-65.6433	-59.7229					76.95	-57.9224	-58.0444	-59.1125	-49.9573
77	-64.27	-64.5752	-65.4907	-59.6008					77	-57.9529	-58.197	-58.8989	-49.9268
77.05	-64.27	-64.5752	-65.4602	-59.3567					77.05	-57.8918	-58.3191	-59.1431	-49.7131
77.1	-64.1479	-64.331	-65.7043	-59.2957					77.1	-57.8613	-58.197	-59.2041	-49.469
77.15	-63.9648	-64.5447	-65.6128	-59.1125					77.15	-57.8308	-58.197	-59.1431	-49.2554
77.2	-64.331	-64.3005	-65.6738	-58.9905					77.2	-57.5256	-58.1055	-58.9905	-49.1638
77.25	-64.27	-64.331	-65.6128	-59.021					77.25	-57.7087	-58.0444	-58.8379	-49.1638
77.3	-64.209	-64.4531	-65.2771	-58.7463					77.3	-57.9529	-58.1665	-58.96	-48.8586
77.35	-64.1174	-64.27	-65.4907	-58.5327					77.35	-57.8918	-58.3191	-59.1125	-48.7366
77.4	-63.9648	-64.2395	-65.6738	-58.6243					77.4	-57.8003	-58.197	-58.9905	-48.3093
77.45	-64.2395	-64.27	-65.5823	-58.4412					77.45	-57.7393	-58.2275	-58.9294	-48.3398
77.5	-64.2395	-64.0564	-65.5823	-58.2581					77.5	-57.6477	-58.1055	-58.7463	-48.3093
77.55	-64.1785	-64.209	-65.5517	-58.3496					77.55	-57.7393	-57.9529	-58.7463	-48.0957
77.6	-64.1174	-64.209	-65.3992	-58.1665					77.6	-57.7393	-58.2275	-58.8684	-47.8821
77.65	-63.8428	-64.0564	-65.5212	-57.8918					77.65	-57.8613	-58.2886	-58.8684	-47.4853
77.7	-63.9038	-64.1785	-65.6738	-58.1055					77.7	-57.8308	-58.1665	-58.8379	-47.5464
77.75	-64.0869	-64.2395	-65.7043	-57.9224					77.75	-57.8308	-58.0444	-58.6853	-47.5159
77.8	-63.9954	-64.0869	-65.5823	-57.8003					77.8	-57.6172	-58.0749	-58.4717	-47.1497
77.85	-64.0564	-63.9954	-65.6738	-57.7087					77.85	-57.5256	-58.0139	-58.6853	-47.0581
77.9	-63.9038	-64.2395	-65.6128	-57.8308					77.9	-57.6172	-58.1055	-58.8379	-46.7224
77.95	-63.7817	-64.1785	-65.2466	-57.6172					77.95	-57.9224	-58.136	-58.6548	-46.6003
78	-63.8733	-63.8428	-65.4602	-57.3425					78	-57.8613	-58.136	-58.5937	-46.6003
78.05	-64.1174	-64.1479	-65.6128	-57.5561					78.05	-57.8003	-58.136	-58.5632	-46.3867
78.1	-64.0564	-64.0869	-65.6738	-57.5867					78.1	-57.8003	-58.0139	-58.4412	-46.2036
78.15	-63.9038	-63.9038	-65.5823	-57.5256					78.15	-57.8308	-57.7698	-58.5022	-45.929
78.2	-63.8428	-64.0259	-65.4602	-57.2815					78.2	-57.6782	-57.9529	-58.5632	-45.5017
78.25	-63.6291	-64.1785	-65.3992	-57.5867					78.25	-57.4951	-58.136	-58.5022	-45.6238
78.3	-63.7512	-64.1174	-65.3076	-57.6477					78.3	-57.6782	-58.136	-58.5327	-45.3796
78.35	-63.9648	-63.9343	-65.4602	-57.4951					78.35	-57.9529	-57.9529	-58.3496	-45.0745
78.4	-63.8733	-64.1785	-65.6128	-57.3425					78.4	-57.8918	-58.0444	-58.2581	-44.7082
78.45	-63.7817	-64.0869	-65.6128	-57.7087					78.45	-57.7698	-58.0444	-58.3496	-44.4031
78.5	-63.7512	-64.0564	-65.5823	-57.6782					78.5	-57.8003	-57.8613	-58.5327	-44.1284
78.55	-63.5071	-64.0564	-65.5517	-57.7698					78.55	-57.8308	-57.9529	-58.4717	-44.0369
78.6	-63.5071	-64.331	-65.4602	-57.6172					78.6	-57.6172	-58.197	-58.3801	-43.6707
78.65	-63.6902	-64.209	-65.2161	-58.0444					78.65	-57.5561	-58.197	-58.4106	-43.3044
78.7	-63.8428	-63.8733	-65.1855	-58.197					78.7	-57.6172	-58.0139	-58.3496	-43.0908
78.75	-63.7512	-64.1479	-65.4297	-58.2886					78.75	-57.8918	-58.1055	-58.0749	-42.5415
78.8	-63.7207	-64.1479	-65.5212	-58.2275					78.8	-57.8613	-58.0444	-58.197	-42.2363
78.85	-63.5681	-64.1174	-65.4602	-58.8074					78.85	-57.8003	-57.8918	-58.3801	-42.1448
78.9	-63.446	-63.8123	-65.3992	-58.96					78.9	-57.8308	-57.7393	-58.4717	-41.7175
78.95	-63.446	-64.0869	-65.3686	-59.2346					78.95	-57.8308	-58.0444	-58.2581	-41.2598
79	-63.5376	-64.1785	-65.2466	-59.2651					79	-57.5256	-58.1665	-58.2275	-40.6494
79.05	-63.6291	-64.0564	-65.2161	-59.7839					79.05	-57.6477	-58.136	-58.2581	-40.1001
79.1	-63.5681	-63.9343	-65.0635	-60.1807					79.1	-57.9224	-57.9529	-58.1055	-39.4287
79.15	-63.5071	-64.209	-65.2161	-60.5469					79.15	-57.8918	-57.9224	-58.0444	-38.8489
79.2	-63.4766	-64.1174	-65.3381	-60.852					79.2	-57.7393	-57.9529	-58.1055	-38.2385
79.25	-63.324	-64.0869	-65.3381	-61.0046					79.25	-57.5561	-57.9529	-58.2581	-37.4451
79.3	-63.1714	-63.8123	-65.3686	-61.4929					79.3	-57.8003	-57.7698	-58.2581	-36.438
79.35	-63.3545	-64.0869	-65.3381	-61.7676					79.35	-57.9224	-57.8308	-58.0139	-35.2783
79.4	-63.4766	-64.0564	-65.2771	-62.0422					79.4	-57.7698	-58.0444	-58.0749	-33.905
79.45	-63.446	-63.9648	-65.2466	-62.1643					79.45	-57.7087	-58.1055	-57.9529	-32.2266
79.5	-63.5376	-63.8428	-65.033	-62.6221					79.5	-57.9529	-57.8918	-57.9834	-30.4565
79.55	-63.4766	-64.0259	-64.9719	-63.0493					79.55	-57.8918	-57.8918	-57.7393	-28.1677
79.6	-63.5986	-63.9343	-64.8193	-63.446					79.6	-57.6172	-57.7698	-57.9224	-25.0854
79.65	-63.446	-64.0259	-64.9414	-63.5071					79.65	-57.9224	-57.8308	-58.1055	-21.2402
79.7	-63.324	-63.7512	-65.0635	-63.7817					79.7	-57.8308	-57.9529	-58.0444	-16.449
79.75	-63.3545	-64.0259	-65.0635	-64.331					79.75	-57.8003	-57.9224	-57.9224	-10.7727
79.8	-63.446	-64.0259	-65.033	-64.6973					79.8	-57.8308	-57.8613	-57.8918	-4.18091
79.85	-63.7512	-64.0564	-64.9719	-65.094					79.85	-57.7393	-57.7087	-57.8918	2.47192
79.9	-63.6597	-63.8123	-64.8193	-65.033					79.9	-57.8918	-57.9529	-57.7393	9.42993
79.95	-63.6291	-63.8123	-64.6667	-65.4297					79.95	-57.8918	-57.8613	-57.7698	16.3269
80	-63.7207	-64.0259	-64.9109	-65.918					80	-57.5867	-57.7087	-57.8918	22.9492
80.05	-63.7207	-63.9648	-64.8804	-66.1011					80.05	-57.9224	-58.0139	-57.8613	29.0832
80.1	-63.6902	-63.7512	-64.6667	-66.3452					80.1	-57.8918	-57.7393	-57.8003	34.2102
80.15	-63.6597	-63.5986	-64.4836	-66.3757					80.15	-57.7698	-57.6782	-57.5256	38.7573
80.2	-63.6291	-63.8123	-64.8193	-66.6504					80.2	-57.8918	-57.9224	-57.8613	42.1753
80.25	-63.6597	-63.7512	-64.7583	-67.1997					80.25	-57.6172	-57.8918	-57.7698	44.7082
80.3	-63.8123	-63.6597	-64.5752	-67.3523					80.3	-57.9834	-57.4646	-57.8003	46.0815
80.35	-63.9038	-63.446	-64.6667	-67.5659					80.35	-57.9529	-57.8918	-57.5561	46.4172
80.4	-64.0564	-63.6291	-64.7583	-67.5659					80.4	-57.5867	-57.8613	-57.8003	45.7458
80.45	-64.0259	-63.7817	-64.6667	-67.7795					80.45	-57.9529	-57.7087	-57.7087	44.281
80.5	-64.0259	-63.8123	-64.6362	-68.2068					80.5	-57.7698	-57.8308	-57.5561	41.8701
80.55	-63.9954	-63.6902	-64.7583	-68.2983					80.55	-57.8613	-57.6172	-57.7087	38.7268
80.6	-64.0259	-63.4766	-64.6667	-68.4204					80.6	-57.8003	-57.8308	-57.6172	34.5764
80.65	-63.9954	-63.7207	-64.7278	-68.4509					80.65	-57.7393	-57.8308	-57.4036	29.8462
80.7	-63.8733	-63.8123	-64.8804	-68.4204					80.7	-57.8613	-57.4951	-57.8003	24.5056
80.75	-63.9038	-63.7817	-64.5447	-68.7561					80.75	-57.8918	-57.7698	-57.4036	18.9514
80.8	-64.2395	-63.6291	-64.7888	-68.8782					80.8	-57.6782	-57.6477	-57.4951	13.1531
80.85	-64.3921	-63.446	-64.9109	-68.9697					80.85	-57.7393	-57.8308	-57.5561	7.20215
80.9	-64.331	-63.7817	-64.4836	-68.9392					80.9	-57.8003	-57.8003	-57.3425	1.06811
80.95	-64.1785	-63.8428	-64.8804	-68.9392					80.95	-57.6477	-57.4951	-57.5867	-4.60815
81	-64.0259	-63.8428	-64.6667	-68.9392					81	-57.6172	-57.9529	-57.4341	-10.1624
81.05	-64.27	-63.7207	-64.6667	-69.2139					81.05	-57.7393	-57.8613	-57.373	-15.4724
81.1	-64.3921	-63.5071	-64.9414	-69.4275					81.1	-57.7393	-57.6172	-57.5561	-20.2942
81.15	-64.3616	-63.9038	-64.6973	-69.3054					81.15	-57.6782	-57.8918	-57.312	-24.8108
81.2	-64.0259	-63.9343	-64.8498	-69.3664					81.2	-57.7087	-57.7393	-57.4951	-29.1748
81.25	-64.27	-63.8428	-64.8804	-69.2139					81.25	-57.7087	-57.7393	-57.4951	-33.2336
81.3	-64.3005	-63.8123	-64.6973	-69.2749					81.3	-57.4341	-57.9224	-57.2815	-36.9568
81.35	-64.2395	-63.6902	-65.094	-69.4885					81.35	-57.8308	-57.8003	-57.4341	-40.3137
81.4	-64.1174	-63.7817	-64.9719	-69.5496					81.4	-57.7087	-57.7698	-57.312	-43.7622
81.45	-64.4531	-64.0259	-64.6973	-69.397					81.45	-57.4646	-57.8918	-57.373	-47.1191
81.5	-64.331	-63.8123	-64.9719	-69.3664					81.5	-57.7393	-57.6782	-57.373	-49.9268
81.55	-64.209	-63.8428	-64.9719	-69.2749					81.55	-57.7393	-57.6782	-57.1594	-52.5513
81.6	-64.4531	-63.7512	-64.8193	-69.1528					81.6	-57.5256	-57.8613	-57.2815	-55.0232
81.65	-64.27	-63.6597	-64.9414	-69.2444					81.65	-57.4341	-57.7698	-57.251	-57.6172
81.7	-64.2395	-63.9648	-64.9719	-69.397					81.7	-57.7698	-57.5561	-57.0679	-59.9365
81.75	-64.4531	-63.9648	-64.9414	-69.3664					81.75	-57.6477	-57.8613	-57.251	-61.7981
81.8	-64.27	-63.9343	-64.8804	-69.2749					81.8	-57.4341	-57.8308	-57.1899	-63.385
81.85	-64.3616	-63.8733	-65.1245	-69.0918					81.85	-57.5867	-57.6172	-57.0068	-65.3381
81.9	-64.4226	-63.6902	-65.0024	-68.9392					81.9	-57.6172	-57.8308	-57.2815	-66.8335
81.95	-64.1479	-63.7512	-64.9414	-68.9697					81.95	-57.5867	-57.7393	-57.1289	-67.9626
82	-64.5447	-64.0259	-65.2466	-69.1528					82	-57.312	-57.6477	-57.0068	-69.1223
82.05	-64.5142	-64.0869	-65.1855	-69.0308					82.05	-57.6782	-57.8003	-57.1289	-70.3125
82.1	-64.209	-63.9648	-65.155	-68.9392					82.1	-57.6172	-57.7698	-57.1289	-71.0754
82.15	-64.6362	-63.9038	-65.2161	-68.8476					82.15	-57.4646	-57.6477	-56.9458	-71.5942
82.2	-64.5142	-63.7817	-65.3992	-68.6951					82.2	-57.4036	-57.5867	-57.0679	-72.4182
82.25	-64.209	-63.6902	-65.3076	-68.5425					82.25	-57.7393	-57.8918	-57.1899	-72.7844
82.3	-64.6667	-63.9648	-64.9719	-68.2678					82.3	-57.6477	-57.7698	-57.1594	-73.0896
82.35	-64.6057	-63.9954	-65.3992	-68.3594					82.35	-57.373	-57.6477	-56.8237	-73.4558
82.4	-64.3616	-63.9954	-65.3381	-68.4509					82.4	-57.5561	-57.7698	-57.1899	-73.5168
82.45	-64.6667	-64.0259	-65.3076	-68.3289					82.45	-57.6477	-57.8613	-57.1289	-73.5168
82.5	-64.5752	-63.9038	-65.1855	-68.1763					82.5	-57.6477	-57.7087	-57.0068	-73.7305
82.55	-64.209	-63.7207	-65.5517	-68.1457					82.55	-57.4646	-57.6172	-57.0984	-73.3642
82.6	-64.6057	-63.8428	-65.6128	-68.0237					82.6	-57.5867	-57.8613	-57.1289	-73.2727
82.65	-64.5447	-64.0564	-65.4297	-67.8406					82.65	-57.6172	-57.8308	-57.0374	-73.2422
82.7	-64.27	-64.1174	-65.3686	-67.5049					82.7	-57.7393	-57.7393	-57.0068	-72.9065
82.75	-64.4531	-63.9343	-65.6433	-67.5354					82.75	-57.4646	-57.5867	-57.2205	-72.7539
82.8	-64.6057	-63.9038	-65.5517	-67.688					82.8	-57.7393	-57.9224	-57.1899	-72.5403
82.85	-64.4226	-63.9038	-65.3686	-67.5659					82.85	-57.7087	-57.8308	-57.0374	-72.113
82.9	-64.27	-63.6902	-65.4602	-67.4133					82.9	-57.7393	-57.6172	-57.3425	-71.8994
82.95	-64.6057	-63.7817	-65.6128	-67.3218					82.95	-57.4036	-57.8918	-57.2205	-71.4722
83	-64.4531	-63.8733	-65.5517	-67.1081					83	-57.6477	-57.9834	-57.1594	-71.1059
83.05	-64.2395	-63.9343	-65.3076	-67.0776					83.05	-57.6172	-57.8613	-57.0984	-70.6177
83.1	-64.331	-64.0259	-65.4907	-66.7114					83.1	-57.7393	-57.5561	-57.4646	-70.5566
83.15	-64.331	-63.8733	-65.6128	-66.6504					83.15	-57.4341	-57.8003	-57.251	-69.9158
83.2	-64.27	-63.9648	-65.5823	-66.5588					83.2	-57.6782	-57.8613	-57.2205	-69.2444
83.25	-63.9648	-63.9038	-65.4907	-66.6809					83.25	-57.7393	-57.8613	-57.251	-69.1528
83.3	-64.331	-63.8123	-65.4602	-66.6504					83.3	-57.8003	-57.4646	-57.4951	-68.7256
83.35	-64.2395	-63.8428	-65.7349	-66.4062					83.35	-57.5867	-57.8308	-57.312	-68.1152
83.4	-64.1174	-63.9954	-65.6433	-66.3452					83.4	-57.6477	-57.7393	-57.0679	-67.5659
83.45	-63.9343	-64.1479	-65.5517	-66.2231					83.45	-57.7698	-57.7698	-57.373	-67.4133
83.5	-64.1785	-64.1785	-65.5823	-66.1316					83.5	-57.8003	-57.4341	-57.5256	-66.803
83.55	-64.0869	-64.0869	-65.6738	-65.979					83.55	-57.6477	-57.7698	-57.312	-66.1316
83.6	-63.9343	-64.0564	-65.5517	-65.7349					83.6	-57.4646	-57.7698	-57.0984	-65.8264
83.65	-63.9038	-63.9343	-65.5212	-65.4907					83.65	-57.8308	-57.7087	-57.4341	-65.4602
83.7	-64.1785	-63.9343	-65.2466	-65.5212					83.7	-57.8308	-57.4036	-57.5867	-64.9414
83.75	-64.0869	-63.8428	-65.4602	-65.5823					83.75	-57.8003	-57.7087	-57.312	-64.1785
83.8	-63.9343	-63.9954	-65.4907	-65.6128					83.8	-57.6172	-57.8308	-57.1594	-64.0869
83.85	-63.7817	-64.1174	-65.4297	-65.6128					83.85	-57.7393	-57.7087	-57.5256	-63.6597
83.9	-64.0869	-64.27	-65.155	-65.5212					83.9	-58.0749	-57.4951	-57.4951	-63.2019
83.95	-64.0259	-64.4226	-65.1855	-65.3992					83.95	-57.8003	-57.5867	-57.373	-62.4695
84	-63.8428	-64.3005	-65.3381	-65.2771					84	-57.8308	-57.8003	-57.1594	-62.3779
84.05	-63.6291	-64.3005	-65.2771	-65.2161					84.05	-57.7087	-57.7087	-57.4951	-62.0117
84.1	-63.9648	-64.209	-65.2161	-65.094					84.1	-58.0444	-57.4646	-57.5561	-61.615
84.15	-63.9343	-64.0564	-65.094	-64.8498					84.15	-57.9834	-57.4341	-57.373	-60.9436
84.2	-63.8123	-64.4836	-65.2771	-64.9109					84.2	-58.0139	-57.7087	-57.2205	-60.9436
84.25	-63.5376	-64.4531	-65.2771	-64.9414					84.25	-57.9224	-57.5867	-57.4646	-60.4553
84.3	-63.9343	-64.3921	-65.2771	-64.9414					84.3	-57.8918	-57.4951	-57.5256	-60.1196
84.35	-63.9038	-64.3005	-65.0635	-64.7888					84.35	-58.0444	-57.3425	-57.373	-59.5093
84.4	-63.8733	-64.27	-65.0635	-64.6362					84.4	-58.2275	-57.5867	-57.251	-59.4482
84.45	-63.6902	-64.5752	-65.1855	-64.4531					84.45	-58.0749	-57.5256	-57.2815	-59.0515
84.5	-63.8123	-64.4531	-65.155	-64.6667					84.5	-58.1055	-57.5256	-57.6172	-58.6853
84.55	-63.9343	-64.2395	-65.2466	-64.6973					84.55	-57.8918	-57.4646	-57.373	-58.136
84.6	-63.8123	-64.6667	-65.033	-64.4226					84.6	-58.2581	-57.3425	-57.4341	-58.0139
84.65	-63.6291	-64.5447	-65.0024	-64.209					84.65	-58.3191	-57.5867	-57.2205	-57.8003
84.7	-63.5071	-64.331	-65.2771	-64.4836					84.7	-58.2275	-57.5561	-57.5867	-57.4036
84.75	-63.8733	-64.6057	-65.3686	-64.3921					84.75	-58.2581	-57.4951	-57.4951	-56.8237
84.8	-63.8123	-64.6362	-65.2771	-64.0869					84.8	-58.0749	-57.4341	-57.4341	-56.6711
84.85	-63.8123	-64.4226	-65.0024	-64.27					84.85	-58.197	-57.373	-57.3425	-56.5796
84.9	-63.5376	-64.6973	-64.9414	-64.1785					84.9	-58.5022	-57.6477	-57.4341	-56.0913
84.95	-63.7207	-64.6362	-65.2466	-63.8733					84.95	-58.3191	-57.4646	-57.5256	-55.6641
85	-63.9038	-64.3616	-65.2466	-64.2395					85	-58.3191	-57.5561	-57.4646	-55.3894
85.05	-63.7512	-64.7278	-65.1245	-64.1479					85.05	-58.1665	-57.3425	-57.4341	-55.4199
85.1	-63.6902	-64.6973	-64.8804	-63.8428					85.1	-58.1055	-57.373	-57.2815	-55.0537
85.15	-63.446	-64.4531	-64.6973	-64.1479					85.15	-58.3191	-57.6172	-57.4341	-54.7485
85.2	-63.6902	-64.6667	-65.0024	-64.2395					85.2	-58.3801	-57.5867	-57.5561	-54.2908
85.25	-63.7817	-64.5752	-64.9414	-63.9038					85.25	-58.2886	-57.5867	-57.5561	-54.1992
85.3	-63.5986	-64.7278	-64.9414	-64.3005					85.3	-58.3496	-57.373	-57.4951	-53.9856
85.35	-63.5376	-64.7583	-65.0024	-64.2395					85.35	-58.0749	-57.373	-57.251	-53.6499
85.4	-63.385	-64.4531	-64.7888	-64.1174					85.4	-58.1665	-57.6172	-57.5256	-53.2837
85.45	-63.5986	-64.8193	-64.8498	-64.3921					85.45	-58.2886	-57.5256	-57.6172	-52.948
85.5	-63.6902	-64.7888	-64.9414	-64.1785					85.5	-58.4106	-57.5256	-57.5867	-52.9785
85.55	-63.6291	-64.4836	-64.9414	-64.1479					85.55	-58.2275	-57.3425	-57.5561	-52.7039
85.6	-63.6291	-64.7278	-64.9109	-64.2395					85.6	-58.3191	-57.2815	-57.373	-52.3376
85.65	-63.385	-64.6667	-64.9719	-64.0564					85.65	-58.1665	-57.4341	-57.6782	-52.063
85.7	-63.4766	-64.5752	-64.7583	-64.1785					85.7	-58.1055	-57.5867	-57.6782	-51.7883
85.75	-63.6597	-64.7278	-64.7278	-64.209					85.75	-58.3191	-57.4646	-57.5561	-51.6663
85.8	-63.6597	-64.5142	-64.9719	-64.0564					85.8	-58.4106	-57.4951	-57.6477	-51.3306
85.85	-63.5986	-64.5752	-65.094	-64.0869					85.85	-58.2886	-57.2815	-57.5256	-51.1169
85.9	-63.3545	-64.7583	-64.9719	-64.0869					85.9	-58.3191	-57.251	-57.5256	-50.8118
85.95	-63.2629	-64.5447	-64.9414	-64.0869					85.95	-58.197	-57.4036	-57.7087	-50.5371
86	-63.5681	-64.5447	-64.7888	-63.8733					86	-58.0749	-57.5561	-57.7393	-50.5066
86.05	-63.5986	-64.6973	-64.8804	-64.209					86.05	-58.1055	-57.312	-57.7698	-50.2014
86.1	-63.5681	-64.6362	-65.0024	-64.1785					86.1	-58.3191	-57.3425	-57.6782	-49.8352
86.15	-63.4766	-64.4836	-65.094	-63.7207					86.15	-58.3801	-57.2205	-57.5256	-49.3774
86.2	-63.2324	-64.7278	-65.094	-64.0564					86.2	-58.3191	-57.1594	-57.7698	-49.0723
86.25	-63.4766	-64.6973	-65.1245	-63.9343					86.25	-58.197	-57.2815	-58.0139	-49.1333
86.3	-63.5376	-64.331	-65.033	-63.8123					86.3	-58.1665	-57.373	-57.7698	-48.8586
86.35	-63.5681	-64.7888	-64.8804	-63.8428					86.35	-58.0139	-57.2205	-57.7698	-48.4924
86.4	-63.5681	-64.6362	-64.8498	-64.0259					86.4	-58.136	-57.2815	-57.7393	-48.1262
86.45	-63.5376	-64.4226	-65.0635	-63.9038					86.45	-58.2581	-57.1594	-57.6477	-47.699
86.5	-63.385	-64.5752	-65.1245	-63.7207					86.5	-58.3496	-57.0679	-57.8308	-47.5769
86.55	-63.385	-64.6973	-65.1245	-63.9648					86.55	-58.2886	-57.1899	-58.0444	-47.4243
86.6	-63.5986	-64.7278	-65.155	-64.0869					86.6	-58.1665	-57.373	-57.9529	-46.9665
86.65	-63.6597	-64.3616	-65.033	-63.9954					86.65	-58.197	-57.312	-58.0444	-46.7224
86.7	-63.5986	-64.6667	-65.033	-63.9038					86.7	-58.0749	-57.312	-57.8003	-46.2341
86.75	-63.5681	-64.7583	-64.9109	-64.27					86.75	-57.9529	-57.2205	-57.5867	-45.8679
86.8	-63.2935	-64.5142	-65.1855	-64.1479					86.8	-58.0444	-57.2205	-57.8613	-45.7764
86.85	-63.3545	-64.4836	-65.3381	-64.0564					86.85	-58.1665	-57.0068	-58.0444	-45.5017
86.9	-63.6597	-64.7278	-65.3686	-63.9954					86.9	-58.2581	-57.1594	-57.8918	-45.0745
86.95	-63.6291	-64.7583	-65.2771	-64.3005					86.95	-58.1665	-57.3425	-57.9529	-44.6472
87	-63.5681	-64.4836	-65.3076	-64.1479					87	-58.0444	-57.373	-57.9224	-44.0979
87.05	-63.7207	-64.5752	-65.1245	-64.0259					87.05	-58.0444	-57.2205	-57.8003	-43.9453
87.1	-63.6291	-64.6362	-65.033	-63.9343					87.1	-58.0444	-57.2205	-57.8003	-43.7012
87.15	-63.5376	-64.6362	-65.0635	-64.331					87.15	-57.8918	-57.1594	-58.0139	-43.335
87.2	-63.446	-64.3005	-65.2466	-64.1174					87.2	-57.8918	-57.0679	-58.0749	-42.8162
87.25	-63.7207	-64.6362	-65.3686	-64.1785					87.25	-58.0749	-57.0984	-58.0749	-42.3889
87.3	-63.8428	-64.5752	-65.3992	-63.9343					87.3	-58.136	-57.2815	-57.9529	-41.7175
87.35	-63.7817	-64.5142	-65.5212	-64.3921					87.35	-58.0139	-57.3425	-58.0444	-41.2903
87.4	-63.7817	-64.3005	-65.3381	-64.3005					87.4	-57.9834	-57.4341	-57.8613	-40.9851
87.45	-63.5681	-64.5447	-65.3381	-64.1785					87.45	-57.8308	-57.2205	-57.7698	-40.4663
87.5	-63.5071	-64.4836	-65.3076	-63.9954					87.5	-57.8918	-57.2205	-57.9224	-39.7949
87.55	-63.5681	-64.4531	-65.2771	-64.331					87.55	-58.1055	-57.1289	-58.0444	-39.093
87.6	-63.6291	-64.331	-65.2466	-64.3616					87.6	-57.9834	-57.1594	-57.9834	-38.2385
87.65	-63.7512	-64.6057	-65.3686	-64.1785					87.65	-57.8308	-57.1289	-57.9529	-37.2925
87.7	-63.9038	-64.5142	-65.4297	-63.8733					87.7	-57.9529	-57.2815	-57.9224	-36.5295
87.75	-63.8428	-64.4226	-65.6128	-64.0869					87.75	-58.1055	-57.4341	-57.8613	-35.6445
87.8	-63.9038	-64.27	-65.4907	-64.1479					87.8	-58.0139	-57.4646	-57.7087	-34.2712
87.85	-63.7512	-64.5752	-65.4602	-64.1174					87.85	-57.8003	-57.251	-57.8308	-32.8064
87.9	-63.6902	-64.5447	-65.4297	-63.9954					87.9	-58.1055	-57.2815	-57.9224	-30.8533
87.95	-63.6597	-64.4226	-65.3686	-63.9343					87.95	-58.0444	-57.1289	-58.0749	-28.4119
88	-63.8428	-64.1479	-65.3686	-64.27					88	-57.8003	-57.4036	-57.9834	-25.2686
88.05	-63.8428	-64.5142	-65.094	-63.9954					88.05	-58.0444	-57.4036	-58.0444	-21.7895
88.1	-63.9343	-64.4836	-65.3076	-63.9954					88.1	-57.9224	-57.373	-57.9834	-17.1814
88.15	-63.8733	-64.4836	-65.4907	-63.8733					88.15	-57.9529	-57.1289	-57.9834	-11.5967
88.2	-63.8123	-64.209	-65.5212	-64.0259					88.2	-57.9834	-57.373	-57.8003	-5.15747
88.25	-63.8733	-64.4531	-65.5823	-64.3005					88.25	-57.8308	-57.4036	-57.9224	1.64795
88.3	-63.8123	-64.6057	-65.2771	-64.0564					88.3	-58.0139	-57.3425	-58.136	8.88061
88.35	-63.7817	-64.5752	-65.2161	-63.9038					88.35	-58.0444	-57.0984	-58.0749	15.9912
88.4	-63.7207	-64.3921	-65.4907	-63.8428					88.4	-57.7698	-57.5256	-57.9834	22.8577
88.45	-63.8733	-64.3005	-65.3686	-64.1479					88.45	-58.0749	-57.373	-57.9224	28.7781
88.5	-63.9038	-64.6057	-65.2771	-64.1174					88.5	-57.9224	-57.0984	-57.9834	34.1186
88.55	-64.0564	-64.5752	-65.1245	-64.0564					88.55	-58.0444	-57.4341	-58.1055	38.5132
88.6	-64.0259	-64.4531	-65.3686	-63.9954					88.6	-58.0139	-57.373	-58.1055	42.1448
88.65	-64.0564	-64.1479	-65.3076	-63.9954					88.65	-57.8003	-57.2205	-57.9529	44.8303
88.7	-63.9343	-64.4531	-64.9414	-64.1785					88.7	-58.1055	-57.3425	-58.1055	46.4783
88.75	-63.9648	-64.5752	-65.3686	-64.27					88.75	-58.1665	-57.1899	-58.197	47.1802
88.8	-63.9038	-64.5447	-65.3076	-64.3005					88.8	-57.8918	-57.4036	-58.0139	46.9971
88.85	-63.7817	-64.5142	-65.0635	-64.2395					88.85	-58.1665	-57.3425	-58.2581	45.6543
88.9	-63.7207	-64.27	-65.3992	-64.209					88.9	-57.9834	-57.1289	-58.1055	43.3655
88.95	-63.7512	-64.5447	-65.3076	-64.3921					88.95	-58.1055	-57.4341	-57.9834	40.0391
89	-63.8428	-64.5447	-65.033	-64.4226					89	-58.136	-57.251	-58.3496	35.8582
89.05	-64.1479	-64.5447	-65.3686	-64.4226					89.05	-58.0444	-57.312	-58.3496	31.0669
89.1	-64.0869	-64.3921	-65.2771	-64.3616					89.1	-58.0444	-57.2815	-57.9529	25.7568
89.15	-63.9648	-64.209	-65.1245	-64.1479					89.15	-58.197	-57.0984	-58.3801	20.0806
89.2	-64.0259	-64.5142	-65.2466	-64.4226					89.2	-58.0139	-57.373	-58.2886	14.0686
89.25	-63.9343	-64.5447	-65.094	-64.5447					89.25	-58.1055	-57.2205	-58.3191	7.75146
89.3	-63.9343	-64.4836	-65.2771	-64.4836					89.3	-58.197	-57.1289	-58.3801	1.70898
89.35	-64.0259	-64.4226	-65.2771	-64.4836					89.35	-58.1665	-57.3425	-58.1055	-4.11987
89.4	-64.0564	-64.209	-64.9109	-64.331					89.4	-57.9529	-57.1289	-58.4106	-9.85718
89.45	-63.9648	-64.5142	-65.2771	-64.3921					89.45	-58.2581	-57.251	-58.4412	-15.3809
89.5	-63.8123	-64.6362	-65.3992	-64.6973					89.5	-58.1665	-57.1899	-58.136	-20.5383
89.55	-64.1174	-64.6057	-65.094	-64.6667					89.55	-58.0139	-57.0374	-58.4106	-25.5127
89.6	-64.0564	-64.5447	-65.3686	-64.6362					89.6	-58.3496	-57.2815	-58.2275	-30.1208
89.65	-63.9038	-64.3005	-65.2771	-64.6057					89.65	-58.1665	-57.251	-58.4717	-34.3628
89.7	-64.0259	-64.6057	-65.2466	-64.4531					89.7	-57.9224	-56.9763	-58.4106	-38.1165
89.75	-64.1174	-64.7278	-65.4602	-64.6057					89.75	-58.2581	-57.2815	-58.0749	-41.8701
89.8	-64.0564	-64.6667	-65.3076	-64.6973					89.8	-58.1665	-57.251	-58.4106	-45.105
89.85	-63.9038	-64.7278	-65.1245	-64.7583					89.85	-58.1665	-57.1289	-58.4412	-48.3398
89.9	-64.2395	-64.4836	-65.3686	-64.7583					89.9	-58.0749	-57.1594	-58.1665	-51.4832
89.95	-64.1479	-64.5142	-65.3076	-64.5752					89.95	-58.3496	-57.1899	-58.5022	-54.2602
90	-63.9648	-64.8193	-65.094	-64.3921					90	-58.1055	-57.1899	-58.3191	-56.6711
90.05	-64.1479	-64.8498	-65.4297	-64.5752					90.05	-58.0444	-57.1289	-58.2275	-58.8989
90.1	-64.0259	-64.7888	-65.3381	-64.6973					90.1	-58.2275	-57.2205	-58.4412	-61.2793
90.15	-64.0869	-64.7888	-65.155	-64.8804					90.15	-58.2581	-57.1594	-58.4106	-63.2019
90.2	-64.1479	-64.6973	-65.4602	-64.7888					90.2	-58.136	-56.9153	-58.136	-64.8498
90.25	-63.7817	-64.8193	-65.3076	-64.8193					90.25	-58.0444	-57.2815	-58.5327	-66.4062
90.3	-64.0869	-64.9414	-65.3076	-64.7583					90.3	-58.2581	-57.0984	-58.3496	-68.0237
90.35	-64.1174	-64.9109	-65.3076	-64.6362					90.35	-58.197	-56.9763	-58.0444	-69.1223
90.4	-63.7817	-64.9109	-65.4907	-64.8498					90.4	-58.1055	-57.2815	-58.3801	-69.8852
90.45	-64.209	-64.9719	-65.3381	-65.0635					90.45	-58.136	-57.1289	-58.3496	-71.2585
90.5	-64.0564	-64.7278	-65.0635	-65.033					90.5	-58.3496	-57.0374	-58.197	-71.8384
90.55	-63.8123	-64.7278	-65.4297	-65.033					90.55	-58.136	-57.0984	-58.3801	-72.2351
90.6	-64.1174	-64.9414	-65.3381	-65.0635					90.6	-57.8918	-57.2815	-58.2886	-73.0286
90.65	-63.9648	-65.033	-65.2466	-65.0635					90.65	-58.1055	-57.1899	-58.3191	-73.4253
90.7	-63.7512	-64.8498	-65.094	-64.8804					90.7	-58.136	-56.8237	-58.3191	-73.5168
90.75	-64.0564	-64.8804	-65.3381	-65.094					90.75	-58.1055	-57.2205	-58.4106	-73.9441
90.8	-64.0259	-64.7583	-65.3076	-65.4297					90.8	-57.8003	-57.2205	-58.3496	-73.9136
90.85	-63.6597	-64.6362	-65.1245	-65.4907					90.85	-58.1055	-57.1289	-58.0749	-73.822
90.9	-64.0259	-64.7583	-65.2161	-65.3381					90.9	-58.0749	-57.0374	-58.5327	-74.1272
90.95	-63.9343	-64.9414	-65.3381	-65.4602					90.95	-57.9224	-57.2815	-58.3191	-73.822
91	-63.7512	-64.9719	-65.3686	-65.4907					91	-57.7698	-57.2815	-58.2275	-73.6694
91.05	-64.0259	-64.7888	-65.1245	-65.3992					91.05	-58.1055	-57.0679	-58.2886	-73.6389
91.1	-64.0564	-64.9414	-65.2161	-65.2466					91.1	-57.9529	-57.1289	-58.4412	-73.2727
91.15	-63.9038	-64.6973	-65.2161	-65.4602					91.15	-57.8918	-57.312	-58.3191	-72.9065
91.2	-63.9648	-64.5752	-65.2161	-65.6738					91.2	-57.6782	-57.312	-58.136	-72.7844
91.25	-64.1785	-64.6362	-64.9414	-65.6433					91.25	-57.9834	-56.9458	-58.4412	-72.3572
91.3	-64.209	-64.7888	-65.2466	-65.7043					91.3	-57.9834	-57.312	-58.3801	-71.9299
91.35	-63.8123	-64.9109	-65.1855	-65.7349					91.35	-57.8613	-57.251	-58.2581	-71.7773
91.4	-64.1174	-64.7888	-65.0024	-65.6128					91.4	-57.6172	-57.251	-58.197	-71.2585
91.45	-64.2395	-64.7583	-64.9109	-65.7043					91.45	-57.8613	-57.0984	-58.4717	-70.5872
91.5	-64.1174	-64.7583	-65.1245	-65.5517					91.5	-57.8918	-57.4036	-58.4412	-70.5872
91.55	-63.8123	-64.5752	-65.094	-65.6433					91.55	-57.8003	-57.2815	-58.1055	-69.9463
91.6	-64.209	-64.4836	-65.033	-65.8264					91.6	-57.5256	-57.2815	-58.3801	-69.397
91.65	-64.1174	-64.6667	-64.8498	-65.979					91.65	-57.7087	-57.0374	-58.4106	-69.0308
91.7	-64.0564	-64.8498	-65.033	-66.1316					91.7	-57.8308	-57.4036	-58.4412	-68.6951
91.75	-63.9954	-64.9719	-65.033	-65.918					91.75	-57.7698	-57.4036	-58.0444	-68.2068
91.8	-64.3005	-64.7888	-65.0024	-65.9485					91.8	-57.6172	-57.312	-58.4106	-67.5049
91.85	-64.2395	-64.7278	-64.8193	-66.0095					91.85	-57.5561	-57.1289	-58.3496	-67.3218
91.9	-64.0259	-64.6973	-64.9414	-65.9485					91.9	-57.8613	-57.4341	-58.3191	-66.8335
91.95	-64.0869	-64.6362	-65.094	-65.9485					91.95	-57.7393	-57.4036	-58.1055	-66.2842
92	-64.3005	-64.5142	-64.9414	-65.7654					92	-57.5867	-57.4036	-58.3801	-65.7043
92.05	-64.331	-64.3921	-64.7583	-65.7043					92.05	-57.4341	-57.0679	-58.2886	-65.6128
92.1	-64.1785	-64.5752	-64.7888	-65.9485					92.1	-57.6782	-57.3425	-58.3801	-65.155
92.15	-64.0259	-64.6973	-65.0024	-66.0705					92.15	-57.7698	-57.4341	-58.0749	-64.6667
92.2	-64.3005	-64.5752	-64.9414	-66.1926					92.2	-57.6172	-57.373	-58.3801	-64.2395
92.25	-64.27	-64.5752	-64.7888	-66.1011					92.25	-57.5561	-57.1289	-58.3496	-64.0259
92.3	-64.1479	-64.5142	-64.7583	-66.04					92.3	-57.4646	-57.312	-58.3191	-63.6597
92.35	-64.0869	-64.6057	-64.9414	-66.0705					92.35	-57.6782	-57.4646	-58.0139	-63.1714
92.4	-64.3005	-64.3616	-64.9414	-65.8874					92.4	-57.6172	-57.4036	-58.2886	-62.7747
92.45	-64.1785	-64.3005	-64.8804	-65.8264					92.45	-57.6477	-57.251	-58.3801	-62.6221
92.5	-64.1785	-64.4531	-64.7583	-65.7349					92.5	-57.4646	-57.251	-58.2886	-62.1948
92.55	-63.9343	-64.5752	-64.7278	-65.8569					92.55	-57.373	-57.4951	-58.0749	-61.615
92.6	-64.27	-64.5142	-64.9414	-65.9485					92.6	-57.5256	-57.4646	-58.2581	-61.3708
92.65	-64.3005	-64.331	-64.7583	-65.8874					92.65	-57.5867	-57.3425	-58.3496	-61.1877
92.7	-64.3005	-64.1785	-64.7888	-65.8874					92.7	-57.4951	-57.0984	-58.3801	-60.791
92.75	-64.0869	-64.3921	-64.4226	-65.6738					92.75	-57.4646	-57.4646	-58.1665	-60.3027
92.8	-64.2395	-64.331	-64.6667	-65.7959					92.8	-57.312	-57.4341	-58.136	-59.8755
92.85	-64.331	-63.9954	-64.7888	-66.0095					92.85	-57.5561	-57.3425	-58.4412	-59.8755
92.9	-64.3005	-64.2395	-64.7278	-65.8569					92.9	-57.5867	-57.2815	-58.3496	-59.5093
92.95	-64.1174	-64.209	-64.7888	-65.8264					92.95	-57.4036	-57.312	-58.3191	-59.021
93	-64.0869	-64.1479	-64.3921	-65.918					93	-57.312	-57.5561	-58.1055	-58.7158
93.05	-64.2395	-64.1479	-64.6667	-65.8264					93.05	-57.251	-57.4036	-58.3496	-58.7158
93.1	-64.1785	-64.1785	-64.7888	-65.8264					93.1	-57.5256	-57.4341	-58.4717	-58.3801
93.15	-64.3005	-63.9954	-64.7278	-65.7959					93.15	-57.5561	-57.1594	-58.3496	-58.0139
93.2	-63.8428	-64.1174	-64.7888	-65.918					93.2	-57.4341	-57.373	-58.2275	-57.5256
93.25	-64.1785	-64.0869	-64.5142	-65.7959					93.25	-57.3425	-57.5256	-58.197	-57.4951
93.3	-64.3005	-63.8123	-64.6057	-65.7043					93.3	-57.1899	-57.373	-58.5327	-57.4341
93.35	-64.27	-63.9954	-64.8804	-65.8874					93.35	-57.2815	-57.4036	-58.3801	-57.0068
93.4	-64.1479	-63.9954	-64.7583	-65.7043					93.4	-57.4036	-57.251	-58.3801	-56.6406
93.45	-63.9038	-63.5986	-64.7888	-65.7349					93.45	-57.4036	-57.2205	-58.197	-56.366
93.5	-64.1785	-64.0259	-64.5752	-65.8874					93.5	-57.4036	-57.4341	-58.3191	-56.3965
93.55	-64.3005	-63.8733	-64.4836	-65.5823					93.55	-57.312	-57.4341	-58.4106	-55.9998
93.6	-64.2395	-63.8123	-64.8193	-65.979					93.6	-57.0679	-57.4646	-58.3801	-55.8166
93.65	-64.0564	-63.9954	-64.7583	-65.8874					93.65	-57.3425	-57.312	-58.3801	-55.4199
93.7	-63.8428	-63.7207	-64.7278	-65.5517					93.7	-57.4036	-57.1899	-58.1665	-55.3894
93.75	-64.1785	-63.9648	-64.7278	-65.9485					93.75	-57.2815	-57.4951	-58.2581	-55.1758
93.8	-64.209	-63.9648	-64.5752	-65.8874					93.8	-57.2205	-57.5256	-58.4412	-54.9011
93.85	-64.1479	-63.6291	-64.6973	-65.6738					93.85	-57.1899	-57.373	-58.4106	-54.5959
93.9	-64.0564	-64.0259	-64.8804	-65.918					93.9	-57.0984	-57.373	-58.4717	-54.2908
93.95	-63.8733	-63.8733	-64.8498	-65.7959					93.95	-57.1594	-57.2205	-58.1665	-54.1687
94	-64.209	-63.6597	-64.8498	-65.6433					94	-57.312	-57.4341	-58.3191	-54.0466
94.05	-64.27	-63.9343	-64.8193	-65.979					94.05	-57.251	-57.4951	-58.5327	-53.772
94.1	-64.1174	-63.8428	-64.5142	-65.7959					94.1	-57.251	-57.4341	-58.5022	-53.4973
94.15	-64.1785	-63.6597	-64.6973	-65.6738					94.15	-57.1289	-57.4951	-58.4412	-53.1311
94.2	-64.0259	-63.9038	-64.9109	-65.918					94.2	-56.9153	-57.3425	-58.3496	-53.1921
94.25	-64.1174	-63.6902	-64.9719	-66.0095					94.25	-56.9458	-57.2205	-58.2275	-52.948
94.3	-64.27	-63.6902	-64.9719	-65.6433					94.3	-57.1594	-57.4646	-58.4717	-52.7344
94.35	-64.1785	-63.8733	-64.8804	-66.04					94.35	-57.1289	-57.6172	-58.5022	-52.3376
94.4	-64.1174	-63.7817	-64.7278	-65.918					94.4	-57.0679	-57.5256	-58.4412	-52.0935
94.45	-64.0869	-63.5681	-64.9109	-65.7654					94.45	-57.0984	-57.4646	-58.4106	-52.1545
94.5	-63.8733	-63.9343	-65.1245	-65.9485					94.5	-57.0068	-57.4036	-58.3496	-52.063
94.55	-64.1479	-63.8733	-65.1245	-65.8569					94.55	-56.8542	-57.3425	-58.2581	-51.7578
94.6	-64.209	-63.4766	-65.0024	-65.7654					94.6	-56.8237	-57.4951	-58.4717	-51.5442
94.65	-64.27	-63.8428	-65.033	-65.6738					94.65	-57.0374	-57.5561	-58.4717	-51.2085
94.7	-64.1479	-63.8428	-64.9719	-65.918					94.7	-57.1289	-57.4646	-58.4717	-51.3
94.75	-64.0259	-63.6902	-64.8193	-65.7959					94.75	-57.0374	-57.4951	-58.3191	-51.178
94.8	-63.9343	-63.7207	-64.8804	-65.4602					94.8	-57.0679	-57.5256	-58.2275	-50.9338
94.85	-64.209	-63.8733	-65.0635	-65.6433					94.85	-57.0374	-57.312	-58.3191	-50.7202
94.9	-64.27	-63.8123	-65.033	-65.8264					94.9	-57.0068	-57.312	-58.5022	-50.4456
94.95	-64.1174	-63.6597	-64.9719	-65.6128					94.95	-56.7017	-57.6172	-58.4717	-50.3845
95	-64.1479	-64.0259	-64.9414	-65.2466					95	-56.8848	-57.6477	-58.4106	-50.4456
95.05	-63.9954	-63.9648	-64.8193	-65.5517					95.05	-57.0068	-57.4951	-58.4412	-50.2624
95.1	-63.8123	-63.9038	-64.7583	-65.4907					95.1	-57.1289	-57.5256	-58.3496	-50.2319
95.15	-63.9648	-63.9038	-64.7888	-65.4297					95.15	-57.0374	-57.4341	-58.1665	-49.8352
95.2	-64.1785	-64.209	-64.9109	-65.1245					95.2	-56.8848	-57.4036	-58.4106	-49.5911
95.25	-64.1479	-64.0869	-64.9719	-65.3381					95.25	-57.0068	-57.373	-58.5022	-49.7131
95.3	-64.1785	-63.8733	-65.0024	-65.2466					95.3	-56.9763	-57.4646	-58.5022	-49.7131
95.35	-64.0564	-64.1479	-65.033	-65.094					95.35	-56.7627	-57.6477	-58.4717	-49.4385
95.4	-63.9038	-64.27	-64.7888	-64.9719					95.4	-56.7932	-57.6477	-58.4412	-49.4385
95.45	-63.8123	-64.0564	-64.6973	-65.0635					95.45	-56.9763	-57.4341	-58.197	-49.1638
95.5	-64.1174	-63.8733	-64.6057	-65.033					95.5	-57.0984	-57.4341	-58.2581	-48.8892
95.55	-64.27	-64.209	-64.6057	-64.9109					95.55	-57.0068	-57.4646	-58.4412	-48.9807
95.6	-64.1479	-64.2395	-64.7888	-64.7278					95.6	-56.9458	-57.4646	-58.6243	-49.0112
95.65	-64.0564	-64.209	-64.8193	-65.0635					95.65	-57.0374	-57.4646	-58.5327	-48.8586
95.7	-64.0564	-64.0259	-64.8193	-64.9109					95.7	-57.0374	-57.6172	-58.4412	-48.645
95.75	-63.9343	-64.3616	-64.8804	-64.9414					95.75	-56.8848	-57.6477	-58.3496	-48.4314
95.8	-63.8428	-64.3616	-64.7278	-64.6667					95.8	-57.1594	-57.7393	-58.3191	-48.1873
95.85	-63.8123	-64.2395	-64.6667	-64.9719					95.85	-57.0679	-57.5256	-58.197	-48.0957
95.9	-63.9648	-64.1785	-64.6057	-64.9109					95.9	-57.0984	-57.5561	-58.3496	-48.1262
95.95	-64.0564	-64.3921	-64.5752	-64.9414					95.95	-56.8237	-57.5256	-58.3801	-47.9431
96	-63.9343	-64.3921	-64.6057	-64.6362					96	-57.0984	-57.4341	-58.5022	-47.7295
96.05	-63.9648	-64.331	-64.6362	-64.8804					96.05	-57.0374	-57.4341	-58.4412	-47.6074
96.1	-63.9038	-64.1785	-64.7278	-64.9414					96.1	-56.9763	-57.6172	-58.3801	-47.3328
96.15	-63.8123	-64.3921	-64.7278	-64.9109					96.15	-56.9153	-57.7698	-58.3496	-46.9971
96.2	-63.6902	-64.331	-64.6057	-64.6667					96.2	-57.0374	-57.7087	-58.2886	-47.0581
96.25	-63.6597	-64.2395	-64.6362	-64.6667					96.25	-56.9458	-57.5561	-58.197	-47.0276
96.3	-63.7207	-64.0869	-64.5142	-64.9109					96.3	-56.9153	-57.4646	-58.2581	-46.9055
96.35	-63.8733	-64.3616	-64.331	-64.6973					96.35	-56.9763	-57.5867	-58.3496	-46.6003
96.4	-63.8428	-64.2395	-64.3616	-64.7583					96.4	-56.8848	-57.7698	-58.4717	-46.5393
96.45	-63.7512	-64.331	-64.209	-64.5142					96.45	-56.9458	-57.5867	-58.4106	-46.3562
96.5	-63.7207	-64.0564	-64.4226	-64.6667					96.5	-56.9458	-57.4951	-58.3801	-45.9595
96.55	-63.6291	-64.209	-64.6057	-64.7278					96.55	-56.7017	-57.6477	-58.2886	-45.929
96.6	-63.5681	-64.3005	-64.5447	-64.7583					96.6	-56.9763	-57.7698	-58.1665	-46.0205
96.65	-63.5071	-64.209	-64.4836	-64.5142					96.65	-56.9153	-57.5561	-58.3191	-45.8679
96.7	-63.5071	-63.9954	-64.1479	-64.4836					96.7	-56.7322	-57.4036	-58.4717	-45.6543
96.75	-63.6291	-64.0259	-64.4836	-64.7278					96.75	-56.8542	-57.8308	-58.2581	-45.4712
96.8	-63.7512	-64.1785	-64.5142	-64.6362					96.8	-56.7627	-57.6782	-58.3801	-45.3796
96.85	-63.9343	-64.1479	-64.27	-64.5752					96.85	-56.8848	-57.4341	-58.136	-45.1355
96.9	-63.8123	-63.9648	-64.2395	-64.3921					96.9	-56.9763	-57.7393	-58.4412	-44.7693
96.95	-63.6902	-63.8428	-64.4226	-64.5142					96.95	-56.5796	-57.7698	-58.3191	-44.6777
97	-63.7512	-64.1174	-64.3921	-64.6667					97	-56.9458	-57.6477	-58.3191	-44.6472
97.05	-63.7207	-64.0564	-64.1174	-64.6973					97.05	-56.8237	-57.6477	-58.2275	-44.6777
97.1	-63.6597	-64.1479	-64.4836	-64.6057					97.1	-56.9153	-57.6477	-58.3801	-44.3726
97.15	-63.5376	-63.8428	-64.4226	-64.3921					97.15	-56.8237	-57.8308	-58.2275	-44.0674
97.2	-63.5071	-63.8733	-64.1479	-64.4531					97.2	-56.6711	-57.7393	-58.1055	-43.9453
97.25	-63.5376	-64.1479	-64.5752	-64.7888					97.25	-56.9153	-57.4646	-58.4106	-43.6401
97.3	-63.6291	-64.0869	-64.5142	-64.6973					97.3	-56.9153	-57.8613	-58.1665	-43.335
97.35	-63.7207	-64.0259	-64.209	-64.5752					97.35	-56.6101	-57.7393	-58.136	-43.0298
97.4	-63.7207	-63.7512	-64.5752	-64.3616					97.4	-56.9458	-57.8003	-58.3191	-42.8162
97.45	-63.6902	-63.9038	-64.4836	-64.27					97.45	-56.9763	-57.8003	-58.1665	-42.7856
97.5	-63.6597	-64.1174	-64.3616	-64.5447					97.5	-56.6406	-57.5256	-58.2581	-42.6331
97.55	-63.385	-63.9954	-64.6057	-64.5752					97.55	-56.9153	-57.9834	-58.2581	-42.3279
97.6	-63.446	-63.9648	-64.331	-64.5447					97.6	-56.7932	-57.8308	-58.0444	-42.0837
97.65	-63.7207	-63.6902	-64.5447	-64.3616					97.65	-56.7017	-57.6477	-58.3496	-41.7175
97.7	-63.6291	-63.8123	-64.5752	-64.3005					97.7	-56.9763	-57.9224	-58.1055	-41.4734
97.75	-63.5376	-64.0869	-64.27	-64.4836					97.75	-56.7932	-57.7393	-58.1665	-41.0767
97.8	-63.1714	-63.8733	-64.6973	-64.5447					97.8	-56.7322	-57.8308	-58.2581	-40.7104
97.85	-63.5681	-63.9038	-64.6973	-64.4531					97.85	-56.9458	-57.8613	-57.9224	-40.1916
97.9	-63.5376	-63.7817	-64.5447	-64.4836					97.9	-56.9153	-57.6782	-58.2275	-39.9475
97.95	-63.446	-63.8733	-64.8804	-64.4226					97.95	-56.7627	-57.9834	-58.1055	-39.6423
98	-63.3545	-64.1174	-64.7888	-64.1479					98	-56.6711	-57.9224	-58.136	-39.3372
98.05	-63.5986	-63.9038	-64.6057	-64.3921					98.05	-57.0374	-57.6172	-58.2886	-38.8184
98.1	-63.5681	-63.9343	-65.033	-64.4836					98.1	-56.8542	-57.8918	-58.0749	-38.1775
98.15	-63.3545	-63.8123	-64.9414	-64.331					98.15	-56.6101	-57.9834	-58.1665	-37.3535
98.2	-63.5986	-63.8123	-64.8498	-64.3616					98.2	-57.0068	-57.8308	-58.2581	-36.7432
98.25	-63.5986	-63.9648	-65.155	-64.27					98.25	-56.9763	-57.9224	-58.1055	-36.1328
98.3	-63.4155	-63.9954	-65.0635	-64.0869					98.3	-56.7932	-57.9224	-58.2581	-35.0037
98.35	-63.8123	-63.8733	-65.0024	-64.331					98.35	-56.8237	-57.8613	-58.1665	-33.7524
98.4	-63.5986	-63.9648	-65.3686	-64.4836					98.4	-56.9458	-57.9224	-58.0139	-32.4097
98.45	-63.4766	-63.8123	-65.4297	-64.4531					98.45	-57.0068	-57.9834	-58.3496	-30.9753
98.5	-63.7207	-63.7512	-65.2161	-64.4836					98.5	-56.5796	-57.8613	-58.2275	-28.8086
98.55	-63.5986	-64.0564	-65.6433	-64.3616					98.55	-57.0068	-57.8003	-57.9529	-26.0315
98.6	-63.7512	-64.2395	-65.6128	-64.209					98.6	-56.8542	-58.0749	-58.3191	-23.3459
98.65	-63.7207	-64.0869	-65.4297	-64.3005					98.65	-56.9153	-58.0139	-58.2275	-19.4092
98.7	-63.4155	-63.9954	-65.5517	-64.5752					98.7	-56.8237	-57.7698	-57.9834	-14.2822
98.75	-63.8428	-63.9038	-65.8569	-64.5447					98.75	-57.0374	-58.136	-58.2275	-9.12476
98.8	-63.7817	-63.8733	-65.8874	-64.5142					98.8	-56.9458	-58.0444	-58.2275	-2.92969
98.85	-63.5681	-64.2395	-65.5212	-64.5447					98.85	-56.8237	-57.9224	-58.136	3.57056
98.9	-63.9343	-64.1785	-65.8264	-64.3616					98.9	-56.8542	-57.8613	-58.0749	10.0098
98.95	-63.9038	-64.1174	-65.8874	-64.2395					98.95	-56.9763	-58.197	-58.197	16.6321
99	-63.7512	-64.1479	-65.8264	-64.4226					99	-56.9153	-58.0139	-58.1055	22.583
99.05	-63.9648	-63.9954	-65.6433	-64.6057					99.05	-56.7017	-57.7698	-57.9529	28.0457
99.1	-63.9954	-63.8733	-66.04	-64.6362					99.1	-56.9458	-58.136	-58.197	33.1116
99.15	-63.8123	-64.209	-66.04	-64.5752					99.15	-56.8848	-58.136	-58.1055	36.9568
99.2	-64.0564	-64.209	-65.9485	-64.7278					99.2	-56.8542	-58.0139	-57.9529	40.1916
99.25	-64.1174	-64.27	-65.8874	-64.6057					99.25	-56.6406	-57.8613	-58.2275	42.0837
99.3	-63.7817	-64.2395	-66.0705	-64.3921					99.3	-56.9458	-58.1665	-58.1055	43.8538
99.35	-64.0564	-64.209	-66.1316	-64.4531					99.35	-56.9153	-58.1055	-58.0139	44.2505
99.4	-64.1785	-64.1174	-65.8874	-64.6667					99.4	-56.7627	-57.8918	-58.0139	43.8232
99.45	-64.0564	-64.0869	-66.1011	-64.8193					99.45	-56.7322	-58.0444	-58.2581	42.8772
99.5	-64.0259	-64.3616	-66.1316	-64.8193					99.5	-56.8848	-58.0749	-58.136	40.4663
99.55	-64.331	-64.331	-66.0095	-64.6667					99.55	-56.8848	-58.0749	-57.8613	37.9028
99.6	-64.27	-64.331	-65.7959	-64.7888					99.6	-56.8237	-57.7698	-58.136	34.3018
99.65	-63.9648	-64.331	-66.0095	-64.6973					99.65	-56.6711	-58.1055	-58.197	30.1514
99.7	-64.209	-64.27	-66.04	-64.5447					99.7	-56.7932	-58.0444	-57.9834	25.8179
99.75	-64.209	-64.1479	-66.0705	-64.5447					99.75	-56.8848	-58.0139	-57.8918	20.5994
99.8	-64.1174	-63.9343	-65.7654	-64.6973					99.8	-56.8237	-57.8308	-58.197	15.3198
99.85	-63.9954	-64.0869	-66.0705	-64.9414					99.85	-56.5796	-58.1055	-58.1055	10.0708
99.9	-64.3005	-64.331	-66.1316	-65.033					99.9	-56.8237	-58.0139	-57.8918	4.54712
[truncated: 4,027 more rows]

## Sheet: Fig 1 suppl 6b
Time (ms)	basal1	apical1	apical2	basal2				Inset	t (ms)	apical1a	basal 1a		apical1a	basal 1a
0									0			0
0.1	3.5	4.2	3.6	5.5					0.2	4.75	6.5	0.2	4.75	6.5
0.2	2.1	--	3.2	4					0.4	3.2	5.5	0.4	3.2	5.5
0.3	1.75	0.75	2.6	3.75					0.6	1.5	4.25	0.6	1.5	4.25
0.4	1.35	0.6	2.05	--					0.8	1	3.25	0.8	1	3.25
0.5	1	0.55	1.85	2.5					1	0.75	2.75	1	0.75	2.75
0.6	0.95	0.5	1.75	2					1.2	0.65	2	1.2	0.65	2
0.7	0.75	0.35	1.5	1.8					1.4	0.45	1.8	1.4	0.45	1.8
0.8	0.55	0.25	1.2	1.45					1.6	0.35	1.45	1.6	0.35	1.45
0.9	0.35	0.2	1.05	1.25					1.8	0.32	1.25	1.8	0.32	1.25
1	0.3	0.2	0.9	0.95					2	0.32	0.95	2	0.32	0.95
1.25	0.25	0.2	0.8	0.8					2.5	0.32	0.8	2.5	0.32	0.8
1.5	0.225	0.2	0.75	0.75					3	0.32	0.75	3	0.32	0.75
1.75	0.2	0.2	0.725	0.75					3.5	0.32	0.75	3.5	0.32	0.75
2	0.2	0.2	0.65	0.6					4	0.32	0.8	4	0.32	0.8
2.5	0.2	0.2	0.5	0.45					5	0.32	0.75	5	0.32	0.75
3	0.2	0.2	0.45	--					6	0.32	0.75	6	0.32	0.75
3.5	0.2	--	0.45	--
4	0.2	--	0.45	--
4.5	0.2
5	0.2
5.5	0.2
6	0.2
6.5	0.2

## Sheet: Fig 1 suppl 6c
	ramp control	10 ms	100 ms	400 ms
0	-57.1594	-56.6101	-57.3213	-57.0068
0.05	-57.1594	-56.3965	-57.2297	-57.0068
0.1	-57.1594	-56.7017	-57.2908	-57.1594
0.15	-57.0374	-56.7932	-57.4128	-57.1594
0.2	-56.9763	-56.6711	-57.4128	-56.7932
0.25	-57.3425	-56.4575	-57.4739	-57.0374
0.3	-57.312	-56.7932	-57.3213	-57.0984
0.35	-57.1899	-56.7627	-57.3823	-57.0679
0.4	-57.1594	-56.6101	-57.2908	-56.7322
0.45	-57.0679	-56.488	-57.3518	-56.8542
0.5	-57.1594	-56.7322	-57.1687	-56.9153
0.55	-57.312	-56.7627	-57.1992	-56.9763
0.6	-57.2815	-56.6711	-57.3823	-56.7932
0.65	-57.3425	-56.4575	-57.4434	-56.7627
0.7	-57.2205	-56.7017	-57.3213	-56.9153
0.75	-57.1899	-56.7627	-57.3213	-56.8542
0.8	-57.312	-56.6711	-57.1382	-56.6711
0.85	-57.4036	-56.488	-57.1992	-56.5796
0.9	-57.4646	-56.5796	-57.4739	-56.8237
0.95	-57.373	-56.7627	-57.3213	-56.7017
1	-57.312	-56.6101	-57.3213	-56.5796
1.05	-57.2205	-56.5186	-57.1687	-56.427
1.1	-57.2815	-56.3965	-57.5044	-56.6711
1.15	-57.5256	-56.6406	-57.4434	-56.6711
1.2	-57.4646	-56.5186	-57.2908	-56.5491
1.25	-57.4646	-56.5186	-57.4739	-56.3354
1.3	-57.4341	-56.3354	-57.3823	-56.3965
1.35	-57.373	-56.5491	-57.3518	-56.6101
1.4	-57.2815	-56.5491	-57.5959	-56.3965
1.45	-57.4951	-56.488	-57.4739	-56.3049
1.5	-57.6477	-56.3965	-57.2602	-56.1218
1.55	-57.6477	-56.366	-57.657	-56.488
1.6	-57.5256	-56.5796	-57.5959	-56.366
1.65	-57.5867	-56.4575	-57.4128	-56.3049
1.7	-57.5867	-56.5491	-57.6875	-56.2134
1.75	-57.3425	-56.3354	-57.5044	-56.1523
1.8	-57.5561	-56.2744	-57.5654	-56.3965
1.85	-57.7087	-56.5491	-57.5959	-56.3354
1.9	-57.8003	-56.5186	-57.4739	-56.2439
1.95	-57.6782	-56.488	-57.718	-56.2134
2	-57.6477	-56.2744	-57.6265	-56.0303
2.05	-57.6172	-56.2439	-57.3823	-56.3049
2.1	-57.5867	-56.4575	-57.718	-56.2439
2.15	-57.4951	-56.488	-57.5044	-56.3049
2.2	-57.6172	-56.427	-57.5959	-56.2134
2.25	-57.8308	-56.3049	-57.5959	-55.8777
2.3	-57.8613	-56.1523	-57.5349	-56.1523
2.35	-57.7698	-56.366	-57.5654	-56.2439
2.4	-57.7698	-56.366	-57.6265	-56.1523
2.45	-57.7698	-56.3049	-57.4128	-56.0303
2.5	-57.8003	-56.2439	-57.5654	-55.8777
2.55	-57.6782	-56.0913	-57.5349	-56.0913
2.6	-57.5561	-56.1829	-57.4434	-56.3049
2.65	-57.6782	-56.3965	-57.3823	-56.0608
2.7	-57.8918	-56.3354	-57.5654	-56.0913
2.75	-57.9529	-56.366	-57.4739	-55.9692
2.8	-57.8613	-56.1829	-57.2908	-55.9082
2.85	-57.8613	-56.0608	-57.5654	-56.0303
2.9	-57.8613	-56.2439	-57.4739	-56.2134
2.95	-57.8003	-56.427	-57.1992	-56.0608
3	-57.7393	-56.2744	-57.5654	-56.1523
3.05	-57.6477	-56.366	-57.4128	-55.9082
3.1	-57.6172	-56.2439	-57.3823	-55.9082
3.15	-57.6782	-56.0913	-57.2908	-56.0608
3.2	-57.7698	-56.1523	-57.657	-56.2134
3.25	-57.8613	-56.3354	-57.4128	-56.1218
3.3	-57.9224	-56.2744	-57.2602	-56.1829
3.35	-57.8003	-56.2439	-57.5044	-56.0913
3.4	-57.6782	-56.1829	-57.5349	-55.9692
3.45	-57.8003	-56.0303	-57.4128	-55.9998
3.5	-57.7087	-56.0303	-57.2908	-56.2439
3.55	-57.5256	-56.2439	-57.5349	-56.3049
3.6	-57.5561	-56.2439	-57.5349	-56.2134
3.65	-57.7087	-56.0913	-57.3518	-56.0913
3.7	-57.8613	-56.1829	-57.3823	-56.0608
3.75	-57.5867	-56.0913	-57.5044	-55.9998
3.8	-57.5256	-55.9692	-57.5044	-56.0608
3.85	-57.373	-55.9692	-57.1992	-56.2134
3.9	-57.6172	-56.2134	-57.4434	-56.2439
3.95	-57.5561	-56.2744	-57.4434	-56.2744
4	-57.4951	-56.1829	-57.4434	-56.3049
4.05	-57.2205	-56.0913	-57.1382	-56.1829
4.1	-57.6172	-56.0913	-57.4128	-56.0303
4.15	-57.4646	-56.0303	-57.3823	-56.0608
4.2	-57.3425	-55.8472	-57.3823	-56.2439
4.25	-57.4341	-56.0303	-57.1382	-56.2439
4.3	-57.4646	-56.1829	-57.3518	-56.2744
4.35	-57.2815	-56.2744	-57.3213	-56.2134
4.4	-57.373	-56.1829	-57.2908	-56.2744
4.45	-57.4036	-56.1218	-56.9246	-56.1523
4.5	-57.373	-56.1523	-57.3213	-56.0303
4.55	-57.4646	-56.0608	-57.1992	-55.9998
4.6	-57.4036	-55.8472	-57.2602	-56.2134
4.65	-57.1594	-55.9998	-57.0161	-56.2439
4.7	-57.5256	-56.1218	-57.0771	-56.4575
4.75	-57.373	-56.1829	-57.1992	-56.3354
4.8	-57.1899	-56.1523	-57.1382	-56.3354
4.85	-57.5256	-56.1218	-56.894	-56.2134
4.9	-57.4951	-56.1523	-56.894	-56.2134
4.95	-57.251	-56.1218	-57.0771	-56.2134
5	-57.5561	-56.0608	-57.0466	-56.1218
5.05	-57.4036	-55.9692	-56.9551	-56.1523
5.1	-57.373	-55.8777	-56.772	-56.3354
5.15	-57.4951	-55.9692	-57.0466	-56.427
5.2	-57.4646	-56.0913	-57.1077	-56.3049
5.25	-57.2815	-56.2134	-57.0161	-56.3049
5.3	-57.6782	-56.0608	-56.772	-56.1523
5.35	-57.4951	-56.1523	-56.7109	-56.2134
5.4	-57.1899	-56.0913	-57.0771	-56.4575
5.45	-57.6477	-55.8777	-56.9551	-56.3354
5.5	-57.5256	-56.0303	-56.8635	-56.3965
5.55	-57.4341	-56.2134	-56.772	-56.1523
5.6	-57.6172	-56.0303	-56.894	-56.3965
5.65	-57.6477	-56.0303	-57.0161	-56.3965
5.7	-57.5867	-55.9692	-56.833	-56.3354
5.75	-57.312	-56.2439	-56.8635	-56.2744
5.8	-57.7087	-56.0303	-56.7109	-56.5796
5.85	-57.6172	-55.9998	-56.8635	-56.427
5.9	-57.5561	-56.1523	-56.9856	-56.3354
5.95	-57.4036	-56.0913	-56.833	-56.6711
6	-57.7393	-56.0303	-56.9246	-56.5491
6.05	-57.5561	-56.0303	-56.5583	-56.427
6.1	-57.4341	-56.0913	-56.7415	-56.7017
6.15	-57.5256	-56.0303	-56.894	-56.488
6.2	-57.7393	-56.0608	-56.894	-56.7627
6.25	-57.6782	-56.0608	-56.833	-56.5796
6.3	-57.373	-55.9692	-56.7415	-56.4575
6.35	-57.5867	-56.2439	-56.5278	-56.8237
6.4	-57.7393	-56.0303	-56.833	-56.7932
6.45	-57.6782	-55.8777	-56.772	-56.5186
6.5	-57.4646	-56.3049	-56.7415	-56.8542
6.55	-57.6477	-56.1523	-56.6194	-56.6406
6.6	-57.7698	-55.9998	-56.4973	-56.8237
6.65	-57.6172	-56.1829	-56.6194	-56.7322
6.7	-57.5561	-56.0303	-56.8025	-56.6711
6.75	-57.6782	-56.2134	-56.7109	-56.9458
6.8	-57.7698	-56.1829	-56.6804	-57.0068
6.85	-57.6782	-55.9387	-56.5583	-56.6406
6.9	-57.5561	-56.3049	-56.4058	-57.0068
6.95	-57.5256	-56.2134	-56.5278	-57.0068
7	-57.8308	-55.9082	-56.7415	-56.7322
7.05	-57.5867	-56.3049	-56.6499	-57.0679
7.1	-57.6172	-56.2439	-56.6804	-57.0068
7.15	-57.4036	-55.9387	-56.4668	-56.8542
7.2	-57.7698	-56.2134	-56.3447	-57.1594
7.25	-57.6782	-56.2744	-56.4363	-56.9763
7.3	-57.7087	-56.1523	-56.6804	-56.9763
7.35	-57.373	-56.1523	-56.5889	-57.0679
7.4	-57.6172	-56.2439	-56.5583	-57.2205
7.45	-57.7087	-56.2744	-56.4973	-57.0374
7.5	-57.6477	-56.0913	-56.4973	-56.8848
7.55	-57.4951	-56.366	-56.3447	-57.2815
7.6	-57.373	-56.3049	-56.4668	-57.2205
7.65	-57.6477	-56.1829	-56.6499	-57.0679
7.7	-57.6782	-56.366	-56.5278	-57.1594
7.75	-57.5867	-56.3049	-56.4363	-57.312
7.8	-57.5561	-56.2134	-56.4668	-57.1899
7.85	-57.373	-56.1218	-56.3752	-56.9763
7.9	-57.7087	-56.5186	-56.2227	-57.373
7.95	-57.6172	-56.3354	-56.2227	-57.2815
8	-57.5256	-56.1218	-56.4363	-57.251
8.05	-57.4036	-56.2439	-56.4973	-57.1289
8.1	-57.4036	-56.427	-56.4058	-57.4036
8.15	-57.5867	-56.427	-56.4058	-57.4341
8.2	-57.4646	-56.1829	-56.4058	-57.1899
8.25	-57.4341	-56.4575	-56.3447	-57.2815
8.3	-57.373	-56.5186	-56.2227	-57.4646
8.35	-57.1594	-56.427	-56.2227	-57.4341
8.4	-57.4341	-56.1829	-56.4668	-57.312
8.45	-57.4646	-56.3965	-56.5889	-57.4341
8.5	-57.4341	-56.5186	-56.5278	-57.4951
8.55	-57.251	-56.3965	-56.4668	-57.4646
8.6	-57.0374	-56.1218	-56.5583	-57.312
8.65	-57.312	-56.5796	-56.4973	-57.4646
8.7	-57.4036	-56.5186	-56.3752	-57.5256
8.75	-57.2815	-56.3965	-56.1616	-57.5867
8.8	-57.251	-56.1523	-56.3447	-57.2815
8.85	-57.0679	-56.5186	-56.4363	-57.5256
8.9	-57.1289	-56.6101	-56.6499	-57.6477
8.95	-57.1594	-56.488	-56.5278	-57.6477
9	-57.2205	-56.1523	-56.4668	-57.4951
9.05	-57.1594	-56.4575	-56.4668	-57.5256
9.1	-57.1899	-56.5796	-56.2837	-57.7698
9.15	-56.9458	-56.5186	-56.3752	-57.7393
9.2	-56.8848	-56.3354	-56.5889	-57.5867
9.25	-57.0984	-56.3965	-56.4363	-57.5867
9.3	-57.1594	-56.6101	-56.4668	-57.8308
9.35	-56.9763	-56.427	-56.2532	-57.8308
9.4	-57.0984	-56.3965	-56.5889	-57.7393
9.45	-56.9153	-56.2744	-56.5278	-57.4951
9.5	-56.8848	-56.6406	-56.3752	-57.8003
9.55	-56.9458	-56.5796	-56.4058	-57.8613
9.6	-57.1289	-56.4575	-56.5278	-57.9834
9.65	-57.0374	-56.2744	-56.3752	-57.5867
9.7	-57.0068	-56.3965	-56.3447	-57.7393
9.75	-56.9153	-56.6406	-56.4973	-57.9834
9.8	-56.7627	-56.5186	-56.3447	-57.9224
9.85	-56.7627	-56.4575	-56.4668	-57.8003
9.9	-56.9153	-56.3354	-56.4973	-57.6782
9.95	-57.0068	-56.488	-56.1616	-58.0139
10	-56.9153	-56.5491	-56.6804	-58.0749
10.05	-56.8542	-56.5186	-56.5583	-58.0139
10.1	-56.8237	-56.427	-56.2227	-57.9224
10.15	-56.6406	-56.2744	-56.5278	-57.7393
10.2	-56.5186	-56.3965	-56.4058	-58.197
10.25	-56.6711	-56.5186	-56.4668	-58.0444
10.3	-56.8848	-56.427	-56.5278	-58.1055
10.35	-56.8542	-56.3049	-56.2227	-58.0139
10.4	-56.7322	-56.0913	-56.6499	-57.8613
10.45	-56.7627	-56.3965	-56.5889	-58.1055
10.5	-56.7017	-56.4575	-56.3447	-58.1055
10.55	-56.5491	-56.2744	-56.6499	-58.197
10.6	-56.488	-56.2134	-56.5889	-58.136
10.65	-56.488	-56.0608	-56.4973	-57.8918
10.7	-56.6711	-56.2439	-56.7109	-58.1665
10.75	-56.7017	-56.3354	-56.5889	-58.3496
10.8	-56.6711	-56.2439	-56.4973	-58.2886
10.85	-56.5186	-56.3354	-56.772	-58.1665
10.9	-56.5796	-56.2134	-56.6499	-58.1055
10.95	-56.5186	-56.0913	-56.4668	-58.1055
11	-56.4575	-56.1829	-56.6499	-58.4106
11.05	-56.3354	-56.366	-56.6499	-58.2886
11.1	-56.427	-56.1829	-56.4363	-58.3801
11.15	-56.5186	-56.1829	-56.7415	-58.2581
11.2	-56.7017	-55.9387	-56.5889	-58.2275
11.25	-56.7017	-55.9998	-56.4668	-58.2886
11.3	-56.6711	-56.2439	-56.6499	-58.5327
11.35	-56.6101	-56.1829	-56.6804	-58.4412
11.4	-56.6101	-56.0608	-56.5278	-58.5022
11.45	-56.6406	-56.0608	-56.5889	-58.3191
11.5	-56.6101	-56.0303	-56.6804	-58.1665
11.55	-56.5796	-55.8472	-56.6499	-58.3191
11.6	-56.488	-56.0303	-56.4973	-58.5022
11.65	-56.5491	-56.1523	-56.6804	-58.4412
11.7	-56.6711	-56.1218	-56.7109	-58.4106
11.75	-56.7627	-56.0303	-56.6194	-58.4717
11.8	-56.8237	-55.9082	-56.4973	-58.3496
11.85	-56.7322	-55.7861	-56.833	-58.1665
11.9	-56.7932	-55.9387	-56.6804	-58.3496
11.95	-56.6406	-55.9998	-56.6499	-58.4717
12	-56.5491	-56.0303	-56.5889	-58.4106
12.05	-56.6711	-55.9692	-56.8635	-58.3191
12.1	-56.9458	-55.9998	-56.7109	-58.1665
12.15	-56.7322	-55.8777	-56.6194	-58.2581
12.2	-56.7627	-55.6641	-56.6804	-58.1665
12.25	-56.6101	-55.8472	-56.8025	-58.2581
12.3	-56.9458	-55.9692	-56.6499	-58.4106
12.35	-56.8848	-55.9692	-56.4363	-58.3496
12.4	-56.8542	-55.9082	-56.8025	-58.3191
12.45	-56.7017	-55.9082	-56.8635	-58.2581
12.5	-57.0068	-55.9692	-56.7415	-58.2275
12.55	-56.9153	-55.8166	-56.4973	-57.9834
12.6	-56.7627	-55.6946	-56.7415	-58.1055
12.65	-57.0679	-55.8472	-56.772	-58.1055
12.7	-57.0984	-55.9692	-56.7109	-58.2275
12.75	-56.7627	-55.9692	-56.4973	-58.2581
12.8	-57.2205	-55.8777	-56.7109	-58.1665
12.85	-57.0679	-55.9082	-56.772	-58.136
12.9	-56.9153	-55.9692	-56.6499	-58.1055
12.95	-57.1899	-55.7861	-56.4363	-58.0139
13	-57.1289	-55.6335	-56.6499	-57.9224
13.05	-57.0374	-55.7861	-56.7415	-57.9529
13.1	-57.1594	-55.9692	-56.7109	-58.0749
13.15	-56.9763	-56.0303	-56.4973	-58.1665
13.2	-57.0984	-56.0303	-56.6194	-58.1665
13.25	-57.2815	-56.0913	-56.833	-57.9529
13.3	-57.0679	-56.0608	-56.6499	-57.9834
13.35	-57.2205	-55.9998	-56.5889	-58.0139
13.4	-57.2205	-55.9692	-56.4058	-57.9224
13.45	-57.0679	-55.9998	-56.8025	-57.6477
13.5	-57.3425	-55.8777	-56.7109	-57.8613
13.55	-57.2815	-55.9082	-56.6499	-58.0749
13.6	-57.1289	-56.0608	-56.4973	-58.0749
13.65	-57.312	-56.2439	-56.8025	-57.8003
13.7	-57.4341	-56.2744	-56.8635	-57.8308
13.75	-57.2815	-56.1523	-56.7109	-57.7087
13.8	-57.2815	-56.0608	-56.7415	-57.9529
13.85	-57.5256	-55.9692	-56.6194	-57.8308
13.9	-57.4341	-56.3354	-56.7109	-57.7698
13.95	-57.1594	-56.2439	-56.833	-57.6477
14	-57.5867	-56.0913	-56.833	-57.9834
14.05	-57.5867	-55.9387	-56.772	-57.8003
14.1	-57.4951	-56.2744	-56.5583	-57.6172
14.15	-57.4036	-56.1829	-56.894	-57.8308
14.2	-57.6782	-56.0303	-56.894	-57.8308
14.25	-57.6477	-56.0303	-56.894	-57.6477
14.3	-57.373	-56.2744	-56.7415	-57.7698
14.35	-57.5561	-56.0608	-56.5583	-57.7393
14.4	-57.7393	-55.9692	-56.8635	-57.5867
14.45	-57.6782	-56.2744	-56.9856	-57.7393
14.5	-57.373	-56.1829	-56.772	-57.6477
14.55	-57.7393	-55.9998	-56.772	-57.4036
14.6	-57.7393	-56.2134	-56.6194	-57.8003
14.65	-57.6477	-56.0608	-56.8025	-57.6172
14.7	-57.4646	-56.2134	-57.0161	-57.5256
14.75	-57.7393	-56.0913	-56.833	-57.5867
14.8	-57.7698	-55.9387	-56.8635	-57.4646
14.85	-57.7393	-56.2134	-56.833	-57.6172
14.9	-57.5256	-56.1829	-56.5889	-57.5561
14.95	-57.8613	-55.8777	-56.833	-57.312
15	-57.8308	-56.1829	-57.0161	-57.7087
15.05	-57.8613	-56.1523	-56.8635	-57.4646
15.1	-57.4951	-56.0303	-56.9246	-57.251
15.15	-57.8613	-56.1218	-56.8025	-57.6172
15.2	-57.8613	-55.9998	-56.7415	-57.4951
15.25	-57.9224	-56.0913	-57.0161	-57.3425
15.3	-57.6477	-56.1523	-57.0466	-57.4951
15.35	-57.8003	-55.9082	-56.9551	-57.4646
15.4	-57.9834	-56.0608	-56.894	-57.312
15.45	-57.9224	-56.0913	-56.9246	-57.5256
15.5	-57.7393	-56.0913	-56.6804	-57.373
15.55	-57.7698	-55.9082	-56.9856	-57.1899
15.6	-58.0444	-56.1218	-57.1077	-57.5867
15.65	-57.9529	-56.1218	-57.0466	-57.373
15.7	-57.8308	-55.8777	-57.0771	-57.1289
15.75	-57.6782	-56.1523	-56.9551	-57.4036
15.8	-57.9529	-56.1218	-56.833	-57.4341
15.85	-58.0749	-55.9082	-56.9246	-57.251
15.9	-57.8918	-56.1523	-57.0466	-57.1289
15.95	-57.8308	-56.0303	-57.0771	-57.4951
16	-57.8308	-56.0608	-56.9551	-57.4036
16.05	-58.0444	-55.9692	-57.0161	-57.0679
16.1	-57.9834	-56.1829	-56.9246	-57.251
16.15	-57.8918	-56.0608	-56.8635	-57.312
16.2	-57.8918	-55.8777	-56.772	-57.2205
16.25	-57.8613	-56.1523	-57.1077	-57.0068
16.3	-58.0444	-56.1523	-57.0771	-57.251
16.35	-57.9224	-56.0913	-57.1077	-57.1899
16.4	-58.0139	-55.8166	-56.9551	-57.0679
16.45	-57.8613	-56.2134	-57.0161	-56.9763
16.5	-57.7087	-56.1829	-56.894	-57.1899
16.55	-58.0139	-55.9692	-56.8025	-57.2205
16.6	-57.9529	-55.8777	-56.8635	-57.0374
16.65	-57.9834	-56.1829	-57.0771	-57.0374
16.7	-57.7393	-56.1523	-57.1382	-57.1899
16.75	-57.6477	-55.9082	-57.1382	-57.1594
16.8	-57.9834	-56.0303	-56.9856	-56.9763
16.85	-58.0139	-56.2134	-57.0771	-57.0984
16.9	-57.8613	-56.1523	-57.0466	-57.2205
16.95	-57.8003	-56.0303	-56.9246	-57.1899
17	-57.6477	-56.0303	-56.772	-56.9153
17.05	-57.8918	-56.2134	-56.894	-57.0374
17.1	-57.9529	-56.1829	-57.0161	-57.0984
17.15	-57.8613	-55.9387	-57.1077	-57.1594
17.2	-57.9224	-55.9998	-57.1077	-56.9153
17.25	-57.8613	-56.2134	-57.0161	-57.0679
17.3	-57.6172	-56.1523	-56.9551	-57.1594
17.35	-57.8613	-55.9998	-56.8025	-57.1899
17.4	-58.0444	-55.9998	-56.7109	-56.9153
17.45	-57.9834	-56.2134	-57.0466	-57.0068
17.5	-57.8308	-56.1218	-56.9856	-57.1594
17.55	-57.7698	-56.0303	-56.9856	-57.0679
17.6	-57.7393	-55.8777	-56.833	-57.0679
17.65	-57.9529	-56.1523	-56.8025	-56.8237
17.7	-58.0139	-56.2439	-57.0161	-57.1899
17.75	-57.8613	-56.0913	-57.0161	-57.0679
17.8	-57.9224	-55.8472	-56.8025	-57.0984
17.85	-57.8613	-56.0913	-57.0161	-56.9153
17.9	-57.6477	-56.2744	-56.9856	-57.0374
17.95	-57.7698	-56.0913	-56.8635	-57.1899
18	-57.9224	-56.0303	-56.8635	-57.1594
18.05	-58.0749	-55.9082	-57.0771	-56.9458
18.1	-57.7698	-56.2439	-56.9246	-56.9458
18.15	-57.8613	-56.1829	-56.9551	-57.2205
18.2	-57.7393	-56.1523	-57.1077	-57.1594
18.25	-57.6477	-56.0608	-56.9856	-57.0068
18.3	-57.6477	-55.9998	-57.0466	-56.9153
18.35	-57.9224	-56.1829	-57.0161	-57.0068
18.4	-57.9224	-56.1829	-56.8025	-57.251
18.45	-57.8613	-56.2134	-57.1992	-57.0679
18.5	-57.8003	-56.0913	-57.0161	-57.0679
18.55	-57.7087	-56.0608	-56.9856	-56.9458
18.6	-57.5867	-56.2744	-57.1077	-57.2205
18.65	-57.6477	-56.2134	-56.9856	-57.1899
18.7	-57.6172	-56.2134	-57.1687	-57.0984
18.75	-57.8003	-55.9998	-57.1077	-57.1594
18.8	-57.7698	-56.0608	-56.8635	-57.0068
18.85	-57.7698	-56.3354	-57.2908	-57.0374
18.9	-57.5561	-56.2439	-57.0466	-57.1899
18.95	-57.5561	-56.1829	-56.9246	-57.1899
19	-57.4951	-56.1218	-57.2297	-57.251
19.05	-57.4341	-56.0608	-57.1992	-57.0679
19.1	-57.4646	-56.2744	-56.894	-56.9458
19.15	-57.5867	-56.3354	-57.1687	-57.3425
19.2	-57.6782	-56.2134	-57.1382	-57.251
19.25	-57.6782	-56.3049	-56.9551	-57.1289
19.3	-57.4951	-56.0913	-57.2297	-57.0984
19.35	-57.5256	-56.1523	-57.1687	-57.0068
19.4	-57.5256	-56.3354	-56.9246	-57.1594
19.45	-57.4341	-56.366	-57.2297	-57.2205
19.5	-57.1899	-56.366	-57.1077	-57.1899
19.55	-57.2815	-56.1523	-57.0161	-57.1899
19.6	-57.4036	-56.0913	-57.1382	-57.0679
19.65	-57.4951	-56.2134	-57.1687	-56.8237
19.7	-57.4646	-56.366	-57.0771	-57.0374
19.75	-57.4951	-56.3354	-56.9246	-57.1899
19.8	-57.4341	-56.2744	-57.2297	-57.1594
19.85	-57.373	-56.366	-57.1687	-57.0679
19.9	-57.2815	-56.2134	-56.8635	-57.0374
19.95	-57.312	-56.1218	-57.1077	-56.8848
20	-57.251	-56.427	-57.1077	-56.9153
20.05	-57.2205	-56.488	-57.0771	-57.1289
20.1	-57.0984	-56.3049	-56.8635	-57.0984
20.15	-57.312	-56.3354	-57.1687	-57.0679
20.2	-57.4646	-56.2439	-57.0771	-57.0068
20.25	-57.4341	-56.1523	-57.0161	-56.9153
20.3	-57.312	-56.2439	-56.9551	-56.7627
20.35	-57.3425	-56.427	-57.1077	-56.9763
20.4	-57.1289	-56.427	-57.1077	-57.1899
20.45	-57.2815	-56.3354	-56.894	-57.0679
20.5	-57.4036	-56.3354	-57.0161	-56.9458
20.55	-57.2205	-56.1523	-57.1382	-57.0374
20.6	-57.312	-55.9692	-57.0161	-56.9458
20.65	-57.2205	-56.2134	-56.772	-56.6711
20.7	-57.312	-56.3049	-57.1077	-56.9153
20.75	-57.2815	-56.3049	-57.1382	-57.0984
20.8	-57.1899	-56.2744	-56.9856	-57.1289
20.85	-57.312	-56.3354	-56.8635	-57.0068
20.9	-57.1289	-56.2744	-57.0771	-56.9458
20.95	-57.0679	-56.1218	-57.0771	-56.9763
21	-57.1289	-55.9998	-57.1077	-56.8542
21.05	-57.1899	-56.1218	-56.8025	-56.7627
21.1	-56.9763	-56.3049	-57.0771	-56.7932
21.15	-57.0679	-56.2439	-57.1382	-56.9763
21.2	-57.1594	-56.2134	-57.0161	-57.1594
21.25	-56.8542	-56.3049	-56.9246	-56.9458
21.3	-57.0679	-56.1523	-57.0466	-56.9458
21.35	-56.9763	-56.1218	-57.1687	-57.0374
21.4	-56.7322	-55.9692	-57.1077	-56.9458
21.45	-57.0679	-55.9998	-57.0466	-56.8542
21.5	-56.8848	-56.0608	-56.9856	-56.7932
21.55	-56.7322	-56.1829	-57.1687	-56.8848
21.6	-57.0068	-56.1829	-57.0771	-57.1594
21.65	-56.8237	-56.1829	-57.0771	-57.0984
21.7	-56.6711	-56.1218	-56.833	-57.0679
21.75	-56.8848	-56.0608	-57.1687	-57.0679
21.8	-56.7932	-55.9387	-57.1077	-57.0679
21.85	-56.6711	-56.0303	-57.1687	-56.9153
21.9	-56.8237	-55.8472	-56.8025	-56.7627
21.95	-56.7627	-55.9082	-57.0161	-56.9153
22	-56.6101	-56.1218	-57.1687	-57.2205
22.05	-56.9153	-56.1218	-57.1077	-56.9458
22.1	-56.7322	-56.0303	-57.0771	-56.8848
22.15	-56.5491	-55.9998	-56.9551	-56.7932
22.2	-56.8542	-55.8166	-57.1077	-57.0679
22.25	-56.7627	-56.0608	-57.2908	-57.0068
22.3	-56.6101	-56.0913	-57.0771	-57.0068
22.35	-56.6406	-56.0303	-57.0466	-56.8237
22.4	-56.8542	-55.8166	-56.894	-57.2205
22.45	-56.8237	-56.0913	-57.2297	-57.0068
22.5	-56.5796	-56.0913	-57.1382	-56.7627
22.55	-56.7627	-56.0303	-57.0466	-57.2205
22.6	-56.8542	-55.9082	-56.9246	-57.1899
22.65	-56.8542	-56.1829	-56.8635	-56.8237
22.7	-56.6101	-56.0303	-57.0161	-57.1594
22.75	-56.8542	-55.8472	-57.1687	-57.1289
22.8	-56.8542	-56.1523	-57.0161	-56.8848
22.85	-56.7932	-56.0608	-57.0771	-57.1899
22.9	-56.5796	-55.9387	-56.7415	-57.0984
22.95	-56.9153	-56.0913	-57.0161	-57.1289
23	-56.8848	-55.9692	-57.1687	-57.1899
23.05	-56.7627	-56.1829	-57.0161	-56.9153
23.1	-56.6711	-55.9998	-56.9856	-57.2815
23.15	-56.9458	-55.7861	-56.894	-57.2815
23.2	-56.9153	-56.0913	-56.8025	-57.0984
23.25	-56.8848	-56.0913	-57.0161	-57.4036
23.3	-56.7017	-55.8166	-57.0161	-57.2815
23.35	-56.9763	-56.1218	-56.9856	-57.251
23.4	-56.9153	-55.9692	-56.9246	-57.4341
23.45	-56.8542	-55.9998	-56.7109	-57.2205
23.5	-56.6711	-56.0913	-56.7109	-57.373
23.55	-56.9763	-55.9692	-56.9551	-57.4036
23.6	-56.9763	-55.9692	-56.9856	-57.373
23.65	-56.9458	-56.1218	-56.8025	-57.4341
23.7	-56.6711	-55.9998	-56.772	-57.4951
23.75	-56.9763	-56.0303	-56.6804	-57.3425
23.8	-57.0679	-56.0913	-56.6499	-57.4036
23.85	-56.9763	-56.0303	-56.833	-57.4951
23.9	-56.7322	-55.8777	-56.8635	-57.4036
23.95	-56.7932	-56.0303	-56.7415	-57.312
24	-57.0374	-56.0303	-56.7415	-57.6477
24.05	-56.9458	-55.8472	-56.6804	-57.4341
24.1	-56.8542	-56.1523	-56.5278	-57.1594
24.15	-56.7017	-55.9692	-56.6194	-57.6172
24.2	-56.9458	-55.7556	-56.8025	-57.5561
24.25	-57.0374	-56.0303	-56.772	-57.4036
24.3	-56.8237	-55.9998	-56.7109	-57.3425
24.35	-56.7322	-55.8777	-56.6804	-57.5867
24.4	-56.6711	-55.7861	-56.6194	-57.5256
24.45	-56.9763	-56.0913	-56.4668	-57.1899
24.5	-56.8542	-55.9692	-56.4668	-57.5256
24.55	-56.8542	-55.7251	-56.7109	-57.5256
24.6	-56.7322	-55.9692	-56.772	-57.5256
24.65	-56.7322	-55.9998	-56.6194	-57.312
24.7	-56.9458	-55.9692	-56.5583	-57.5256
24.75	-56.8237	-55.6641	-56.6194	-57.5256
24.8	-56.8237	-55.9692	-56.4973	-57.4646
24.85	-56.7322	-55.9998	-56.3142	-57.4341
24.9	-56.6101	-55.8777	-56.3752	-57.6477
24.95	-56.7932	-55.7251	-56.5583	-57.5256
25	-56.8848	-55.9998	-56.6499	-57.4036
25.05	-56.7627	-55.9387	-56.6194	-57.4951
25.1	-56.6101	-55.8777	-56.4668	-57.6477
25.15	-56.5491	-55.7556	-56.4973	-57.4951
25.2	-56.8848	-56.0608	-56.4363	-57.251
25.25	-56.8542	-55.9998	-56.3752	-57.4341
25.3	-56.7627	-55.8472	-56.2837	-57.5256
25.35	-56.6101	-55.8166	-56.4058	-57.4341
25.4	-56.5491	-56.0608	-56.5889	-57.251
25.45	-56.6406	-56.0913	-56.6194	-57.4341
25.5	-56.6711	-55.8472	-56.5278	-57.373
25.55	-56.7017	-55.7251	-56.5278	-57.4036
25.6	-56.7627	-56.0608	-56.5278	-57.1899
25.65	-56.6101	-56.0303	-56.4363	-57.251
25.7	-56.3965	-55.9387	-56.2227	-57.312
25.75	-56.6711	-55.6946	-56.5583	-57.373
25.8	-56.7932	-56.0608	-56.5889	-57.1289
25.85	-56.6711	-56.0913	-56.5889	-57.1594
25.9	-56.6711	-55.9387	-56.4363	-57.312
25.95	-56.5796	-55.7556	-56.1921	-57.1899
26	-56.5186	-55.9387	-56.5583	-57.1289
26.05	-56.5186	-56.1218	-56.4668	-57.0068
26.1	-56.7322	-55.9387	-56.3752	-57.1899
26.15	-56.6406	-55.7861	-56.2837	-57.1594
26.2	-56.6406	-55.7556	-56.5278	-57.1289
26.25	-56.6101	-56.1523	-56.4058	-56.7627
26.3	-56.3965	-55.9387	-56.1921	-57.0679
26.35	-56.3965	-55.8777	-56.4668	-57.0984
26.4	-56.7017	-55.7861	-56.3752	-57.0679
26.45	-56.7017	-55.9998	-56.1921	-56.8237
26.5	-56.5491	-56.0303	-56.4363	-56.7627
26.55	-56.6101	-55.9998	-56.3752	-57.0068
26.6	-56.6101	-55.8472	-56.2227	-56.8848
26.65	-56.366	-55.7556	-56.4363	-56.9153
26.7	-56.366	-55.9998	-56.1921	-56.6406
26.75	-56.5491	-55.9998	-56.3752	-56.7932
26.8	-56.6711	-55.9387	-56.3142	-57.0068
26.85	-56.6101	-55.8777	-56.009	-56.7932
26.9	-56.488	-55.7251	-56.2532	-56.7627
26.95	-56.5796	-55.9387	-56.2837	-56.6101
27	-56.5186	-56.0303	-56.1311	-56.8237
27.05	-56.3965	-55.9387	-56.2837	-56.8542
27.1	-56.366	-55.7861	-56.0701	-56.8237
27.15	-56.5796	-55.542	-56.2227	-56.7627
27.2	-56.7627	-55.9082	-56.1006	-56.7322
27.25	-56.6406	-55.9692	-55.9175	-56.5796
27.3	-56.5491	-55.8777	-56.1921	-56.8542
27.35	-56.6101	-55.7861	-56.1616	-56.8542
27.4	-56.6406	-55.5725	-55.887	-56.7932
27.45	-56.4575	-55.8472	-56.2227	-56.7017
27.5	-56.3965	-55.9387	-56.1006	-56.5796
27.55	-56.5186	-55.8472	-55.8259	-56.7932
27.6	-56.7017	-55.8777	-56.1616	-56.9153
27.65	-56.6406	-55.7556	-56.1311	-56.7017
27.7	-56.6711	-55.7251	-55.8564	-56.6711
27.75	-56.6406	-55.8777	-56.1921	-56.5186
27.8	-56.7627	-55.9387	-56.0701	-56.6406
27.85	-56.5186	-55.9082	-56.009	-56.7932
27.9	-56.5796	-55.8166	-55.887	-56.7627
27.95	-56.488	-55.6946	-56.1921	-56.6406
28	-56.427	-55.6335	-56.0395	-56.6406
28.05	-56.5796	-55.8777	-55.887	-56.427
28.1	-56.6406	-55.8777	-56.1921	-56.4575
28.15	-56.7627	-55.7861	-56.1311	-56.7932
28.2	-56.7932	-55.7861	-56.009	-56.7932
28.25	-56.6711	-55.7556	-56.1006	-56.5796
28.3	-56.6711	-55.5725	-56.1921	-56.6406
28.35	-56.7627	-55.6946	-56.1311	-56.6711
28.4	-56.7017	-55.8166	-55.887	-56.488
28.45	-56.6406	-55.8472	-56.2837	-56.6711
28.5	-56.427	-55.6641	-56.1311	-56.8237
28.55	-56.488	-55.6335	-56.0701	-56.7627
28.6	-56.8848	-55.5115	-56.009	-56.8542
28.65	-56.7322	-55.542	-56.2532	-56.7322
28.7	-56.6406	-55.6335	-56.0701	-56.5796
28.75	-56.7322	-55.7251	-56.0395	-56.6711
28.8	-56.5186	-55.6946	-56.0701	-56.8237
28.85	-56.6406	-55.7251	-56.2227	-56.8848
28.9	-56.7932	-55.603	-56.1616	-56.8237
28.95	-56.7322	-55.542	-55.9785	-56.7932
29	-56.488	-55.4199	-56.1311	-56.7932
29.05	-56.5796	-55.6641	-56.1921	-56.7017
29.1	-56.7322	-55.6946	-56.1006	-56.5491
29.15	-56.5491	-55.7251	-55.9175	-56.7627
29.2	-56.5186	-55.6335	-56.1311	-56.9763
29.25	-56.7322	-55.603	-56.1921	-56.7932
29.3	-56.6406	-55.542	-56.009	-56.7932
29.35	-56.366	-55.4504	-55.9175	-56.8542
29.4	-56.7017	-55.3894	-56.1616	-56.8237
29.45	-56.5186	-55.6641	-56.1311	-56.6711
29.5	-56.3354	-55.603	-56.0395	-56.5796
29.55	-56.6101	-55.6946	-55.7954	-56.7627
29.6	-56.5491	-55.6641	-56.1311	-56.9458
29.65	-56.366	-55.6641	-56.2227	-56.8848
29.7	-56.6101	-55.5725	-56.1006	-56.8542
29.75	-56.3965	-55.603	-55.948	-56.9153
29.8	-56.5491	-55.2978	-56.009	-56.8542
29.85	-56.5186	-55.4199	-56.1311	-56.7932
29.9	-56.3049	-55.481	-56.0395	-56.7322
29.95	-56.5186	-55.6335	-56.009	-56.5796
30	-56.5186	-55.7251	-55.887	-56.7932
30.05	-56.2744	-55.6946	-56.1921	-56.8848
30.1	-56.6406	-55.603	-56.1006	-56.9458
30.15	-56.4575	-55.6335	-56.1311	-56.9458
30.2	-56.3965	-55.5725	-55.9785	-56.9153
30.25	-56.5491	-55.542	-56.1616	-56.8542
30.3	-56.427	-55.3894	-56.1616	-56.6711
30.35	-56.2439	-55.5725	-56.1311	-56.9458
30.4	-56.4575	-55.6335	-56.0701	-57.1594
30.45	-56.4575	-55.7251	-55.948	-56.9153
30.5	-56.4575	-55.5725	-56.1311	-56.9153
30.55	-56.3049	-55.481	-56.1921	-56.8542
30.6	-56.6711	-55.5115	-56.1311	-57.1289
30.65	-56.488	-55.7556	-56.0395	-56.9458
30.7	-56.2134	-55.6335	-55.9175	-56.8848
30.75	-56.4575	-55.5725	-56.2227	-57.0068
30.8	-56.5186	-55.542	-56.1006	-57.1289
30.85	-56.2744	-55.7861	-56.1006	-56.9763
30.9	-56.3049	-55.603	-55.9175	-57.0068
30.95	-56.488	-55.4504	-55.8564	-57.0679
31	-56.5186	-55.7861	-56.1006	-57.0374
31.05	-56.3049	-55.7556	-56.009	-57.1594
31.1	-56.366	-55.542	-55.948	-57.1289
31.15	-56.5186	-55.8777	-55.887	-56.8542
31.2	-56.5796	-55.7861	-55.7954	-57.312
31.25	-56.2439	-55.6335	-55.948	-57.1289
31.3	-56.488	-55.8472	-55.9175	-56.9763
31.35	-56.5186	-55.7861	-55.9175	-57.2815
31.4	-56.5491	-55.7251	-55.8564	-57.1289
31.45	-56.2744	-55.9998	-55.7344	-57.0679
31.5	-56.5186	-55.7251	-55.8259	-57.1899
31.55	-56.5186	-55.9692	-56.009	-57.0984
31.6	-56.5186	-55.8777	-55.887	-57.4036
31.65	-56.3049	-55.7556	-55.9175	-57.2815
31.7	-56.5186	-55.9998	-55.7344	-57.0374
31.75	-56.5186	-55.9692	-55.6428	-57.4341
31.8	-56.5186	-55.7861	-55.7954	-57.3425
31.85	-56.366	-56.0608	-55.948	-57.0984
31.9	-56.366	-55.9082	-55.8259	-57.4341
31.95	-56.6406	-55.9387	-55.8259	-57.373
32	-56.5796	-56.1523	-55.7039	-57.251
32.05	-56.366	-55.9692	-55.6733	-57.5561
32.1	-56.3354	-55.8166	-55.7344	-57.4646
32.15	-56.6101	-56.0913	-55.9785	-57.251
32.2	-56.5491	-55.9082	-55.8259	-57.5867
32.25	-56.5186	-55.8166	-55.8259	-57.4646
32.3	-56.3354	-56.1829	-55.7039	-57.4036
32.35	-56.5186	-56.0608	-55.6123	-57.6172
32.4	-56.6101	-55.7556	-55.7344	-57.6172
32.45	-56.488	-56.1523	-55.948	-57.5256
32.5	-56.488	-55.9998	-55.8564	-57.4951
32.55	-56.4575	-55.9082	-55.887	-57.7393
32.6	-56.7017	-55.9387	-55.887	-57.7393
32.65	-56.6101	-56.1218	-55.8259	-57.312
32.7	-56.5491	-56.0303	-55.6428	-57.7393
32.75	-56.366	-55.7861	-55.7954	-57.6477
32.8	-56.5186	-56.0303	-55.9175	-57.6172
32.85	-56.6711	-56.0303	-56.009	-57.4646
32.9	-56.5186	-55.9692	-55.887	-57.7698
32.95	-56.5186	-55.8472	-55.9175	-57.7393
33	-56.3354	-56.1218	-55.9175	-57.4951
33.05	-56.6101	-56.0303	-55.7954	-57.7087
33.1	-56.6101	-55.8166	-55.7039	-57.7087
33.15	-56.5491	-55.9692	-55.9175	-57.8003
33.2	-56.5491	-56.0608	-56.0701	-57.6172
33.25	-56.366	-56.0608	-56.009	-57.8003
33.3	-56.6101	-55.8166	-55.887	-57.7393
33.35	-56.7017	-56.0303	-55.9785	-57.7393
33.4	-56.6711	-56.0913	-55.948	-57.4646
33.45	-56.6711	-56.0608	-55.8259	-57.8308
33.5	-56.4575	-55.7556	-55.6733	-57.7698
33.55	-56.5491	-56.0913	-55.8564	-57.7393
33.6	-56.7932	-55.9998	-56.0395	-57.6477
33.65	-56.7322	-56.0303	-56.1311	-57.8308
33.7	-56.6406	-55.7861	-55.9785	-57.7087
33.75	-56.6101	-56.2134	-56.1006	-57.7393
33.8	-56.488	-56.0913	-56.0701	-57.6172
33.85	-56.6711	-56.0608	-55.9785	-57.8613
33.9	-56.8237	-55.8777	-55.8259	-57.7393
33.95	-56.6711	-56.1218	-55.7954	-57.7393
34	-56.7017	-56.1218	-56.009	-57.5867
34.05	-56.6101	-56.1218	-56.1616	-57.8613
34.1	-56.488	-55.8472	-55.948	-57.7698
34.15	-56.6711	-56.0608	-56.0395	-57.7393
34.2	-56.8542	-56.1829	-55.9785	-57.6477
34.25	-56.6711	-56.1218	-55.948	-57.8003
34.3	-56.7322	-55.9692	-56.1616	-57.8003
34.35	-56.5186	-55.9692	-56.0701	-57.8308
34.4	-56.4575	-56.1829	-56.009	-57.7698
34.45	-56.6101	-56.0608	-55.9785	-57.7087
34.5	-56.7627	-56.0608	-56.1616	-58.0139
34.55	-56.6101	-55.7556	-56.0701	-57.8918
34.6	-56.7017	-56.0303	-55.948	-57.7698
34.65	-56.6406	-56.0303	-56.2837	-57.5561
34.7	-56.4575	-56.0608	-56.1921	-57.8613
34.75	-56.488	-55.9082	-56.0395	-57.8613
34.8	-56.7017	-55.7556	-56.3142	-57.8613
34.85	-56.7322	-56.0608	-56.1311	-57.6782
34.9	-56.7017	-55.9692	-56.1006	-57.6172
34.95	-56.6406	-55.8777	-56.2532	-57.8918
35	-56.5796	-55.8166	-56.1616	-57.8308
35.05	-56.4575	-55.9082	-56.3752	-57.8003
35.1	-56.4575	-56.1218	-56.2837	-57.5561
35.15	-56.7017	-55.9998	-56.009	-57.7087
35.2	-56.8237	-55.8472	-56.3447	-57.8613
35.25	-56.7322	-55.7251	-56.2532	-57.7393
35.3	-56.6711	-55.9387	-56.2227	-57.7393
35.35	-56.7017	-56.0608	-56.4363	-57.6172
35.4	-56.7017	-55.8777	-56.1921	-57.6782
35.45	-56.4575	-55.9692	-56.4973	-57.8308
35.5	-56.5796	-55.8472	-56.4058	-57.7393
35.55	-56.7627	-55.8472	-56.1616	-57.8003
35.6	-56.8237	-56.0303	-56.5889	-57.6172
35.65	-56.8542	-55.9998	-56.4668	-57.5256
35.7	-56.7322	-55.9998	-56.1616	-57.6782
35.75	-56.7017	-55.8472	-56.5889	-57.7087
35.8	-56.7017	-55.7556	-56.4973	-57.6172
35.85	-56.6101	-56.0608	-56.2532	-57.5867
35.9	-56.488	-56.0913	-56.5583	-57.2815
35.95	-56.5796	-55.9998	-56.5583	-57.5561
36	-56.7627	-55.9082	-56.2532	-57.6477
36.05	-56.8848	-55.7861	-56.6499	-57.5561
36.1	-56.7627	-55.9387	-56.4973	-57.4951
36.15	-56.6406	-56.0608	-56.2532	-57.4036
36.2	-56.7932	-56.0913	-56.5889	-57.312
36.25	-56.6711	-56.0303	-56.4973	-57.4341
36.3	-56.6406	-55.9387	-56.4668	-57.5561
36.35	-56.4575	-55.8166	-56.4363	-57.5256
36.4	-56.488	-55.9387	-56.7109	-57.373
36.45	-56.5186	-56.0913	-56.5583	-57.2815
36.5	-56.7627	-56.1218	-56.3447	-57.1594
36.55	-56.7017	-55.9998	-56.7415	-57.4036
36.6	-56.7932	-56.0303	-56.7109	-57.4951
36.65	-56.7932	-55.9082	-56.5889	-57.3425
36.7	-56.7322	-55.9082	-56.4973	-57.312
36.75	-56.6711	-56.1218	-56.7109	-57.251
36.8	-56.7322	-56.2134	-56.7109	-57.0679
36.85	-56.6101	-56.0303	-56.4363	-57.0984
36.9	-56.5186	-56.0913	-56.5889	-57.2815
36.95	-56.6406	-56.0608	-56.7415	-57.4341
37	-56.8542	-55.8777	-56.7109	-57.251
37.05	-56.8542	-56.0608	-56.3142	-57.2815
37.1	-56.7932	-56.1829	-56.6804	-57.1899
37.15	-56.6406	-56.2439	-56.6804	-57.0374
37.2	-56.7017	-56.0913	-56.6499	-57.1289
37.25	-56.9153	-56.1523	-56.3752	-57.2205
37.3	-56.7932	-56.0913	-56.772	-57.312
37.35	-56.7932	-55.9998	-56.7415	-57.1899
37.4	-56.7627	-55.9387	-56.6499	-57.2205
37.45	-56.9458	-56.2134	-56.4973	-57.0984
37.5	-56.8542	-56.2744	-56.833	-57.0068
37.55	-56.6406	-56.2439	-56.7415	-56.9763
37.6	-57.0679	-56.1218	-56.6499	-57.1289
37.65	-56.9763	-56.1218	-56.5278	-57.2205
37.7	-56.7322	-56.0913	-56.8025	-57.1289
37.75	-57.0679	-56.0303	-56.7415	-57.1289
37.8	-57.0068	-55.9998	-56.7415	-57.1594
37.85	-56.7322	-56.1829	-56.4973	-57.0068
37.9	-57.1289	-56.2744	-56.833	-57.0068
37.95	-57.0068	-56.2439	-56.7415	-56.9153
38	-56.8237	-56.1523	-56.772	-57.0068
38.05	-57.2205	-56.2134	-56.4668	-57.0068
38.1	-57.0068	-56.2134	-56.772	-57.0679
38.15	-56.9763	-56.0913	-56.7415	-57.1289
38.2	-57.1899	-56.0303	-56.8025	-57.1289
38.25	-57.0679	-55.9387	-56.4668	-56.9763
38.3	-57.0679	-56.1218	-56.6804	-56.9458
38.35	-57.1289	-56.2134	-56.8025	-56.8848
38.4	-57.0068	-56.2744	-56.833	-56.8237
38.45	-57.1594	-56.1829	-56.5583	-56.7932
38.5	-57.1289	-56.2134	-56.6194	-56.9458
38.55	-57.0068	-56.2134	-56.894	-57.0679
38.6	-57.0679	-56.0913	-56.894	-57.1289
38.65	-57.1899	-55.9692	-56.772	-56.9763
38.7	-57.0984	-56.0913	-56.5889	-56.8542
38.75	-56.9763	-56.1523	-56.8635	-56.7932
38.8	-57.2815	-56.1829	-56.9551	-57.1899
38.85	-57.1899	-56.1523	-56.833	-56.8848
38.9	-56.9153	-56.0608	-56.772	-56.8848
38.95	-57.2205	-55.9387	-56.6194	-56.7627
39	-57.1899	-56.2134	-56.9246	-57.0984
39.05	-57.1594	-56.1523	-56.9246	-56.9153
39.1	-56.9763	-56.0913	-56.833	-56.6711
39.15	-57.251	-56.0303	-56.8635	-56.9763
39.2	-57.1594	-56.2744	-56.7109	-56.9458
39.25	-56.9763	-56.2134	-56.833	-56.6406
39.3	-57.1289	-55.9998	-56.9246	-56.9458
39.35	-57.1289	-56.2744	-56.8635	-56.9153
39.4	-57.0984	-56.1829	-56.833	-56.6711
39.45	-56.9458	-55.9387	-56.5278	-56.9458
39.5	-57.1594	-56.366	-56.7415	-56.8848
39.55	-57.0984	-56.2134	-56.9246	-56.6711
39.6	-57.0984	-55.9998	-56.9246	-56.9763
39.65	-56.9153	-56.2439	-56.7109	-56.7627
39.7	-57.0984	-56.1523	-56.6194	-56.7627
39.75	-57.0374	-56.1218	-56.7109	-56.8237
39.8	-57.0679	-56.2134	-56.9856	-56.7322
39.85	-56.9458	-55.9692	-56.8025	-56.8848
39.9	-57.1289	-56.366	-56.8025	-56.8848
39.95	-57.1289	-56.1829	-56.7415	-56.6406
40	-57.0068	-56.0608	-56.6499	-57.0679
40.05	-56.8848	-56.3965	-56.833	-56.7322
40.1	-57.1594	-56.2439	-56.9551	-56.6711
40.15	-57.1594	-56.1218	-56.9856	-56.8848
40.2	-56.9763	-56.3354	-56.9246	-56.8237
40.25	-56.8237	-56.2134	-56.8025	-56.6406
40.3	-56.9763	-56.2744	-56.6804	-56.7627
40.35	-57.1289	-56.427	-56.9551	-56.8237
40.4	-57.0374	-56.3049	-57.0771	-56.7627
40.45	-56.8848	-56.2744	-56.9856	-56.9153
40.5	-56.8848	-56.5491	-56.9856	-56.7322
40.55	-57.0679	-56.3965	-56.9246	-56.6406
40.6	-57.0374	-56.2439	-56.833	-57.0068
40.65	-56.9763	-56.5796	-56.833	-56.7627
40.7	-56.7932	-56.6406	-57.0161	-56.5796
40.75	-57.0679	-56.3354	-57.0161	-56.9458
40.8	-57.0374	-56.6406	-56.9551	-56.8542
40.85	-57.0984	-56.6406	-56.894	-56.7322
40.9	-56.7627	-56.5186	-56.772	-56.7932
40.95	-56.9153	-56.5186	-56.7415	-57.0068
41	-57.0679	-56.7017	-56.833	-57.0068
41.05	-57.0374	-56.6711	-56.894	-56.6711
41.1	-56.9153	-56.3965	-56.9856	-57.0068
41.15	-56.7322	-56.7322	-56.8635	-57.0068
41.2	-56.9153	-56.6101	-56.894	-56.9763
41.25	-57.1594	-56.488	-56.7415	-56.8237
41.3	-56.9458	-56.4575	-56.6194	-57.0679
41.35	-56.8237	-56.6406	-56.6499	-57.0984
41.4	-56.7017	-56.6711	-56.9551	-56.8848
41.45	-56.9458	-56.3965	-56.9551	-57.0679
41.5	-56.9458	-56.6101	-56.9246	-57.1289
41.55	-56.8848	-56.6711	-56.8635	-57.1289
41.6	-56.8542	-56.6101	-56.9246	-56.8848
41.65	-56.7017	-56.3965	-56.833	-57.1594
41.7	-56.8237	-56.6101	-56.772	-57.1289
41.75	-56.9763	-56.6101	-56.7415	-57.0679
41.8	-56.8848	-56.6406	-56.9551	-56.8542
41.85	-56.9458	-56.3965	-56.9856	-57.251
41.9	-56.6711	-56.7932	-56.9551	-57.0374
41.95	-56.7627	-56.6101	-56.9856	-57.0984
42	-56.9153	-56.6406	-56.9856	-56.9153
42.05	-57.0068	-56.3354	-56.8635	-57.1289
42.1	-56.8848	-56.7322	-56.8635	-57.0984
42.15	-56.7322	-56.7322	-56.7415	-57.0984
42.2	-56.6101	-56.7627	-56.8025	-56.8237
42.25	-56.8237	-56.427	-56.833	-57.1289
42.3	-56.9458	-56.7322	-56.9856	-57.1289
42.35	-56.9153	-56.7322	-56.9856	-57.1594
42.4	-56.9458	-56.7017	-56.9856	-56.8848
42.45	-56.7017	-56.5186	-56.8635	-57.1289
42.5	-56.6406	-56.7322	-56.7109	-57.1289
42.55	-56.7627	-56.7322	-57.0466	-57.1594
42.6	-56.7627	-56.7322	-57.0771	-57.0374
42.65	-56.8542	-56.5796	-56.9246	-57.0068
42.7	-56.7017	-56.5491	-56.6804	-57.1594
42.75	-56.5796	-56.7322	-56.9856	-57.1289
42.8	-56.4575	-56.6711	-57.0161	-57.0984
42.85	-56.5491	-56.5796	-56.833	-56.9458
42.9	-56.6406	-56.4575	-56.7415	-57.251
42.95	-56.7322	-56.5796	-57.0161	-57.251
43	-56.5491	-56.7932	-56.9246	-57.312
43.05	-56.6406	-56.6406	-56.5889	-57.0374
43.1	-56.488	-56.5796	-56.9246	-57.0984
43.15	-56.4575	-56.3965	-56.772	-57.3425
43.2	-56.488	-56.6711	-56.772	-57.251
43.25	-56.7627	-56.6406	-56.8635	-57.251
43.3	-56.6711	-56.6406	-56.6499	-57.0068
43.35	-56.6406	-56.366	-56.9246	-57.373
43.4	-56.6101	-56.427	-56.833	-57.4036
43.45	-56.5491	-56.6711	-56.5278	-57.2815
43.5	-56.366	-56.5491	-56.894	-57.2205
43.55	-56.4575	-56.5491	-56.772	-57.1289
43.6	-56.6711	-56.4575	-56.7415	-57.4341
43.65	-56.7627	-56.366	-56.772	-57.4951
43.7	-56.5796	-56.7017	-56.5583	-57.4341
43.75	-56.6406	-56.488	-56.8025	-57.4036
43.8	-56.6711	-56.5491	-56.7415	-57.2205
43.85	-56.5796	-56.366	-56.3447	-57.4341
43.9	-56.427	-56.427	-56.7109	-57.5867
43.95	-56.488	-56.5491	-56.6194	-57.4341
44	-56.6406	-56.6101	-56.4363	-57.5256
44.05	-56.7322	-56.5186	-56.6194	-57.373
44.1	-56.7322	-56.3965	-56.5583	-57.4036
44.15	-56.7017	-56.2439	-56.3447	-57.7393
44.2	-56.6101	-56.5491	-56.6804	-57.7393
44.25	-56.6101	-56.6101	-56.4973	-57.7087
44.3	-56.488	-56.488	-56.2532	-57.5867
44.35	-56.488	-56.3965	-56.5889	-57.5561
44.4	-56.5186	-56.2439	-56.6499	-57.7698
44.45	-56.5796	-56.2134	-56.2227	-57.8918
44.5	-56.7017	-56.4575	-56.5889	-57.7393
44.55	-56.7322	-56.427	-56.5278	-57.8308
44.6	-56.7322	-56.4575	-56.4363	-57.7087
44.65	-56.6406	-56.427	-56.4058	-57.7393
44.7	-56.6406	-56.2439	-56.5889	-57.8308
44.75	-56.6711	-56.2744	-56.5278	-58.0444
44.8	-56.7017	-56.488	-56.3447	-57.8918
44.85	-56.5796	-56.488	-56.5889	-57.9529
44.9	-56.4575	-56.366	-56.5583	-57.7698
44.95	-56.5796	-56.427	-56.4058	-57.6782
45	-56.7322	-56.2744	-56.5278	-57.9224
45.05	-56.8848	-56.2744	-56.5278	-58.0749
45.1	-56.9153	-56.3965	-56.4668	-57.9834
45.15	-56.8542	-56.488	-56.2837	-58.0139
45.2	-56.9153	-56.488	-56.5278	-57.9834
45.25	-56.8848	-56.4575	-56.3447	-57.8308
45.3	-56.7627	-56.4575	-56.2837	-57.7698
45.35	-56.8237	-56.2134	-56.1921	-58.136
45.4	-56.9153	-56.3049	-56.4668	-58.197
45.45	-57.0374	-56.5491	-56.3142	-58.0444
45.5	-56.9458	-56.5491	-56.2227	-58.0139
45.55	-56.8848	-56.4575	-56.2837	-57.9529
45.6	-56.8237	-56.5491	-56.4668	-57.9834
45.65	-57.0984	-56.5186	-56.1921	-57.9224
45.7	-57.0679	-56.366	-56.009	-58.0749
45.75	-56.9153	-56.2744	-56.2227	-58.2581
45.8	-57.0984	-56.4575	-56.3142	-58.197
45.85	-57.1289	-56.6406	-56.1616	-58.0749
45.9	-56.8848	-56.5491	-56.0395	-58.1665
45.95	-57.1899	-56.488	-56.2227	-58.0444
46	-57.2205	-56.5796	-56.4058	-58.0139
46.05	-56.9458	-56.5491	-56.1616	-57.8918
46.1	-57.312	-56.3965	-55.948	-58.0139
46.15	-57.1289	-56.2134	-56.1616	-58.2886
46.2	-57.312	-56.3354	-56.3142	-58.3191
46.25	-57.2205	-56.5796	-56.1616	-58.1055
46.3	-57.0374	-56.4575	-56.1006	-58.1665
46.35	-57.312	-56.5186	-56.0701	-58.0749
46.4	-57.0679	-56.3965	-56.3752	-58.1055
46.45	-57.3425	-56.488	-56.1616	-57.9834
46.5	-57.312	-56.3354	-56.0395	-57.8613
46.55	-57.2815	-56.3354	-56.0701	-58.0749
46.6	-57.4036	-56.2439	-56.3752	-58.197
46.65	-56.9763	-56.3354	-56.1616	-58.1665
46.7	-57.373	-56.3965	-56.1616	-58.0749
46.75	-57.2815	-56.4575	-56.0395	-58.0749
46.8	-57.2205	-56.488	-56.3142	-58.0139
46.85	-57.2815	-56.488	-56.2227	-57.9224
46.9	-57.1289	-56.3965	-56.1311	-57.7698
46.95	-57.373	-56.366	-56.1006	-58.0444
47	-57.3425	-56.3049	-56.1006	-58.136
47.05	-56.9763	-56.3049	-56.2532	-58.0139
47.1	-57.312	-56.3049	-56.1311	-57.8918
47.15	-57.2815	-56.366	-56.1921	-57.7393
47.2	-57.0679	-56.2744	-56.0395	-58.0749
47.25	-57.4036	-56.2744	-55.9785	-57.8613
47.3	-57.251	-55.9692	-56.2532	-57.8918
47.35	-57.0679	-56.2744	-56.1616	-57.7393
47.4	-57.373	-56.2744	-56.1616	-58.0444
47.45	-57.312	-56.1829	-55.8564	-57.9529
47.5	-57.0374	-56.0303	-56.0701	-57.7393
47.55	-57.2815	-56.3049	-56.2837	-58.1055
47.6	-57.3425	-56.2439	-56.1921	-57.9529
47.65	-57.1594	-55.9998	-56.0701	-57.6477
47.7	-57.1594	-56.3049	-55.9785	-57.9224
47.75	-57.312	-56.2744	-56.0701	-57.8918
47.8	-57.2205	-55.9998	-56.3447	-57.6477
47.85	-57.0068	-56.427	-56.1006	-57.8613
47.9	-57.3425	-56.0913	-56.1616	-57.6782
47.95	-57.2815	-56.0608	-55.9785	-57.7698
48	-57.1594	-56.3049	-56.0701	-57.7393
48.05	-57.1899	-56.1829	-56.1921	-57.5867
48.1	-57.2205	-56.1218	-56.2227	-57.8003
48.15	-57.1899	-56.1829	-56.3447	-57.7393
48.2	-57.0068	-56.0608	-56.1616	-57.5256
48.25	-57.312	-56.366	-55.948	-57.7698
48.3	-57.2205	-56.1218	-56.1921	-57.5561
48.35	-57.1899	-55.9692	-56.5278	-57.5867
48.4	-57.1594	-56.3965	-56.3447	-57.6172
48.45	-57.312	-56.3049	-56.2837	-57.5256
48.5	-57.2205	-55.9998	-56.2227	-57.5867
48.55	-57.0374	-56.2744	-56.1616	-57.5561
48.6	-57.2815	-56.2439	-56.4058	-57.4341
48.65	-57.1594	-56.0913	-56.4363	-57.6782
48.7	-57.2205	-56.1523	-56.3447	-57.5867
48.75	-57.0679	-56.0913	-56.4363	-57.4646
48.8	-57.373	-56.0913	-56.3752	-57.5561
48.85	-57.2205	-56.2439	-56.1006	-57.6172
48.9	-57.1594	-56.0913	-56.4363	-57.4951
48.95	-57.0068	-55.9692	-56.5889	-57.4951
49	-57.3425	-56.1829	-56.6194	-57.6782
49.05	-57.2205	-56.1829	-56.4668	-57.5867
49.1	-57.1594	-55.8777	-56.4973	-57.2815
49.15	-57.1594	-56.1829	-56.4668	-57.7087
49.2	-57.4341	-56.0913	-56.4058	-57.6172
49.25	-57.251	-56.0303	-56.6194	-57.4646
49.3	-57.1594	-55.9387	-56.7415	-57.4951
49.35	-57.1594	-56.1218	-56.7415	-57.6782
49.4	-57.5256	-56.0303	-56.6804	-57.6477
49.45	-57.251	-55.8472	-56.6194	-57.373
49.5	-57.2205	-56.1218	-56.5583	-57.6477
49.55	-57.0679	-55.9998	-56.5278	-57.6172
49.6	-57.4036	-55.9692	-56.772	-57.5256
49.65	-57.251	-55.7861	-56.8025	-57.4646
49.7	-57.3425	-56.0608	-56.8025	-57.6782
49.75	-57.1594	-55.9387	-56.8025	-57.6782
49.8	-57.4341	-55.8166	-56.8025	-57.4341
49.85	-57.373	-55.9082	-56.6804	-57.5256
49.9	-57.3425	-55.9998	-56.5278	-57.5256
49.95	-57.2815	-55.9692	-56.6499	-57.5256
50	-57.2815	-55.6946	-56.8025	-57.2815
50.05	-57.4341	-55.9387	-56.894	-57.6172
50.1	-57.373	-55.8777	-56.9246	-57.5256
50.15	-57.4341	-55.7861	-56.8635	-57.5561
50.2	-57.251	-55.603	-56.8635	-57.3425
50.25	-57.4341	-55.9082	-56.7109	-57.5561
50.3	-57.4341	-55.8472	-56.7415	-57.5256
50.35	-57.5256	-55.7861	-56.6804	-57.4646
50.4	-57.373	-55.603	-56.772	-57.373
50.45	-57.2205	-55.9692	-56.9246	-57.5256
50.5	-57.5561	-55.8472	-57.0466	-57.4646
50.55	-57.5256	-55.8777	-56.9551	-57.4036
50.6	-57.6172	-55.603	-57.0161	-57.2205
50.65	-57.312	-55.9082	-56.9246	-57.5256
50.7	-57.312	-55.9082	-56.8025	-57.4341
50.75	-57.7087	-55.8472	-56.833	-57.4646
50.8	-57.6172	-55.6946	-57.0466	-57.2815
50.85	-57.5561	-55.8472	-56.9856	-57.5256
50.9	-57.4646	-55.9387	-56.9856	-57.4951
50.95	-57.4036	-55.8472	-56.8635	-57.5256
51	-57.6782	-55.8472	-56.894	-57.4036
51.05	-57.6477	-55.7556	-57.0466	-57.4036
51.1	-57.6172	-55.9692	-56.9856	-57.4951
51.15	-57.5867	-55.9692	-56.894	-57.4951
51.2	-57.4341	-55.9998	-56.9856	-57.373
51.25	-57.6172	-55.8166	-57.0161	-57.2205
51.3	-57.7087	-55.8777	-56.833	-57.4646
51.35	-57.6172	-56.0303	-57.0466	-57.4646
51.4	-57.7393	-56.0608	-57.0466	-57.4646
51.45	-57.4646	-55.9998	-56.833	-57.3425
51.5	-57.5256	-55.8166	-57.0466	-57.251
51.55	-57.8613	-56.1523	-57.0466	-57.5256
51.6	-57.8613	-56.1523	-56.8635	-57.4646
51.65	-57.7393	-56.1523	-57.0466	-57.3425
51.7	-57.6782	-55.9082	-56.9551	-57.0984
51.75	-57.5561	-55.9998	-56.894	-57.3425
51.8	-57.8613	-56.2744	-56.9856	-57.4646
51.85	-57.8613	-56.1523	-56.833	-57.4036
51.9	-57.9529	-56.0608	-56.9856	-57.312
51.95	-57.9529	-55.9387	-56.9856	-57.1289
52	-57.8613	-56.0303	-56.7109	-57.373
52.05	-57.5867	-56.3049	-57.1077	-57.4341
52.1	-57.7698	-56.0913	-56.9856	-57.251
52.15	-57.9529	-56.1523	-56.894	-57.312
52.2	-58.1055	-55.9998	-57.0771	-57.1594
52.25	-57.9224	-56.0608	-56.894	-57.1899
52.3	-57.9224	-56.1523	-56.9246	-57.2815
52.35	-57.8918	-56.1829	-57.0771	-57.251
52.4	-57.8613	-56.1523	-56.9856	-57.251
52.45	-57.9224	-56.0608	-56.9551	-57.1289
52.5	-58.0444	-55.8472	-57.0466	-57.0374
52.55	-58.0749	-56.0303	-56.9551	-57.2815
52.6	-58.0749	-56.2439	-57.0466	-57.251
52.65	-57.9529	-56.0913	-57.0161	-57.1594
52.7	-57.8918	-55.9692	-57.0466	-57.0068
52.75	-57.8003	-55.8166	-56.9551	-56.9153
52.8	-57.9529	-55.8166	-57.2297	-57.0374
52.85	-58.1055	-56.0608	-57.0161	-57.0984
52.9	-58.136	-56.0303	-56.833	-57.0374
52.95	-58.0749	-55.9082	-57.1992	-56.9763
53	-58.1665	-55.9387	-57.1382	-56.8848
53.05	-58.0444	-55.8472	-56.833	-56.7322
53.1	-57.9529	-55.6641	-57.0771	-56.7627
53.15	-57.7698	-55.9082	-57.1077	-56.9763
53.2	-58.1055	-56.0608	-57.0466	-56.8848
53.25	-58.136	-55.8472	-56.8025	-56.8237
53.3	-58.1665	-55.8472	-57.1992	-56.6711
53.35	-58.0749	-55.6946	-57.1382	-56.6101
53.4	-58.136	-55.6641	-57.0771	-56.5186
53.45	-57.9529	-55.8166	-57.0161	-56.7322
53.5	-57.8613	-55.9998	-57.1687	-56.7627
53.55	-57.8918	-55.8166	-57.1687	-56.6406
53.6	-58.1665	-55.9387	-56.8025	-56.6406
53.65	-58.0139	-55.9082	-57.1077	-56.6406
53.7	-57.9834	-55.6946	-57.0771	-56.366
53.75	-57.9224	-55.603	-57.1077	-56.488
53.8	-57.8918	-55.8472	-56.9856	-56.6711
53.85	-58.0444	-55.9082	-57.1687	-56.7017
53.9	-57.9529	-55.8166	-57.1077	-56.5186
53.95	-57.8613	-55.7251	-57.1382	-56.5491
54	-57.8613	-55.7556	-57.0161	-56.5186
54.05	-57.9224	-55.6335	-57.1687	-56.366
54.1	-57.8918	-55.3894	-57.2297	-56.3049
54.15	-57.7087	-55.5725	-57.0466	-56.488
54.2	-57.9834	-55.7861	-57.0466	-56.5796
54.25	-57.8003	-55.9387	-57.1992	-56.5491
54.3	-57.7087	-55.6335	-57.0771	-56.427
54.35	-57.9224	-55.6335	-57.0771	-56.3965
54.4	-57.7393	-55.6946	-56.9856	-56.3354
54.45	-57.8308	-55.5725	-57.1687	-56.2439
54.5	-57.8003	-55.481	-57.1382	-56.2134
54.55	-57.5256	-55.5115	-57.0161	-56.3354
54.6	-57.9224	-55.6946	-56.9856	-56.4575
54.65	-57.6782	-55.7861	-57.1687	-56.4575
54.7	-57.6172	-55.542	-57.1077	-56.2744
54.75	-57.8003	-55.5115	-57.1077	-56.3354
54.8	-57.6782	-55.6335	-56.9246	-56.427
54.85	-57.7087	-55.481	-57.1382	-56.3049
54.9	-57.6477	-55.3894	-57.0771	-56.0913
54.95	-57.5256	-55.1758	-57.0771	-56.1218
55	-57.8003	-55.2978	-56.8635	-56.366
55.05	-57.6172	-55.481	-56.9551	-56.427
55.1	-57.6477	-55.481	-57.1077	-56.3965
55.15	-57.7393	-55.4504	-57.0466	-56.366
55.2	-57.5561	-55.4504	-56.9856	-56.3965
55.25	-57.7393	-55.3894	-56.7109	-56.3049
55.3	-57.6172	-55.2978	-57.0161	-56.1218
55.35	-57.4341	-55.2368	-57.0466	-56.427
55.4	-57.7393	-55.1758	-57.0771	-56.427
55.45	-57.6477	-55.4504	-56.772	-56.4575
55.5	-57.373	-55.3284	-56.9246	-56.3049
55.55	-57.7698	-55.3589	-57.1687	-56.2134
55.6	-57.6782	-55.2368	-57.0466	-56.488
55.65	-57.4341	-55.1147	-57.0161	-56.427
55.7	-57.6172	-55.3284	-56.772	-56.2134
55.75	-57.6477	-55.2673	-56.9856	-56.3965
55.8	-57.5256	-55.2368	-57.1992	-56.427
55.85	-57.4646	-55.2368	-56.9856	-56.3354
55.9	-57.6172	-55.2978	-56.9246	-56.3049
55.95	-57.5561	-55.1758	-56.772	-56.3965
56	-57.4646	-55.0842	-57.0466	-56.2134
56.05	-57.5867	-55.3894	-57.0771	-56.3965
56.1	-57.5561	-55.1453	-56.9856	-56.3354
56.15	-57.373	-55.0537	-56.9856	-56.1523
56.2	-57.6172	-55.2673	-56.8025	-56.3965
56.25	-57.4951	-55.1453	-56.894	-56.366
56.3	-57.4341	-55.0537	-57.0771	-56.1218
56.35	-57.4341	-55.2063	-56.9856	-56.3965
56.4	-57.5867	-55.0537	-56.9551	-56.2439
56.45	-57.4951	-55.1453	-56.772	-56.2744
56.5	-57.1899	-55.0537	-56.772	-56.3049
56.55	-57.5256	-54.779	-56.9551	-56.1218
56.6	-57.4646	-55.1453	-57.0161	-56.3965
56.65	-57.312	-55.0232	-56.772	-56.3965
56.7	-57.2205	-54.9011	-56.833	-56.0303
56.75	-57.4341	-55.1758	-56.6194	-56.366
56.8	-57.312	-55.0232	-56.7415	-56.2744
56.85	-57.0984	-55.0537	-56.8025	-56.0913
56.9	-57.1899	-54.9927	-56.7415	-56.3049
56.95	-57.373	-54.9011	-56.833	-56.2134
57	-57.2815	-55.1147	-56.6499	-55.9998
57.05	-56.8848	-55.1147	-56.4058	-56.3965
57.1	-57.251	-54.9316	-56.4363	-56.2439
57.15	-57.251	-55.1147	-56.7415	-55.9692
57.2	-57.1289	-55.1147	-56.6804	-56.366
57.25	-56.8542	-55.0537	-56.5889	-56.2134
57.3	-57.1899	-54.9622	-56.5278	-55.9998
57.35	-57.1594	-55.1453	-56.5278	-56.3049
57.4	-57.0984	-55.1453	-56.2837	-56.1829
57.45	-56.9458	-54.9316	-56.4668	-56.2134
57.5	-57.1594	-55.2063	-56.6499	-56.1218
57.55	-57.2205	-55.0842	-56.5889	-56.3354
57.6	-57.0679	-55.0537	-56.5583	-56.2134
57.65	-56.7932	-55.1147	-56.4363	-56.0608
57.7	-57.1594	-55.1758	-56.3752	-56.2744
57.75	-57.251	-55.0842	-56.3447	-56.2744
57.8	-57.0068	-54.9316	-56.3447	-56.1523
57.85	-56.7932	-55.3284	-56.4973	-56.1523
57.9	-57.0679	-55.1758	-56.4363	-56.2134
57.95	-57.1594	-55.0537	-56.3447	-56.2744
58	-57.0679	-55.1758	-56.4363	-55.9998
58.05	-56.7932	-55.3284	-56.2837	-56.3049
58.1	-56.9763	-55.2063	-56.1006	-56.2744
58.15	-57.251	-54.9927	-56.1616	-56.3049
58.2	-57.0374	-55.2978	-56.3142	-56.0608
58.25	-56.9458	-55.3589	-56.3447	-56.3965
58.3	-56.7322	-55.2368	-56.2837	-56.2744
58.35	-57.0984	-55.0232	-56.2532	-56.2439
58.4	-57.0374	-55.3894	-56.1921	-56.1523
58.45	-56.9763	-55.2978	-56.0701	-56.488
58.5	-56.7322	-55.2673	-55.948	-56.3049
58.55	-56.9458	-55.1453	-55.8259	-56.2439
58.6	-57.0068	-55.5115	-55.948	-56.2439
58.65	-56.8848	-55.2978	-56.0395	-56.488
58.7	-56.7932	-55.3589	-56.0395	-56.3354
58.75	-56.6711	-55.1147	-56.0395	-56.2744
58.8	-56.9153	-55.4504	-55.9785	-56.2134
58.85	-56.9153	-55.3894	-55.8259	-56.5491
58.9	-56.7932	-55.3589	-55.7954	-56.3965
58.95	-56.7322	-55.1453	-55.7039	-56.3049
59	-56.5491	-55.542	-55.6733	-56.1829
59.05	-56.8848	-55.481	-55.8564	-56.5186
59.1	-56.7627	-55.4199	-55.8564	-56.3354
59.15	-56.8237	-55.2368	-55.8564	-56.3049
59.2	-56.5796	-55.4199	-55.7954	-56.1829
59.25	-56.5186	-55.5115	-55.5513	-56.5491
59.3	-56.7017	-55.4504	-55.7649	-56.488
59.35	-56.7932	-55.3589	-55.8564	-56.488
59.4	-56.6101	-55.4199	-55.7039	-56.2744
59.45	-56.6101	-55.5725	-55.5818	-56.6101
59.5	-56.427	-55.481	-55.8259	-56.6101
59.55	-56.7932	-55.4199	-55.7649	-56.6101
59.6	-56.6711	-55.3284	-55.6123	-56.488
59.65	-56.6406	-55.481	-55.7649	-56.5186
59.7	-56.6406	-55.5725	-55.7954	-56.7627
59.75	-56.5491	-55.5115	-55.5513	-56.5796
59.8	-56.4575	-55.5115	-55.7954	-56.6711
59.85	-56.7322	-55.2978	-55.6733	-56.5491
59.9	-56.7322	-55.542	-55.4597	-56.6711
59.95	-56.7932	-55.481	-55.887	-56.7932
60	-56.6406	-55.603	-55.7039	-56.7627
60.05	-56.4575	-55.3284	-55.5818	-56.7017
60.1	-56.6711	-55.3589	-55.7344	-56.5186
60.15	-56.8542	-55.5725	-55.6123	-56.7627
60.2	-56.8237	-55.542	-55.6733	-56.8237
60.25	-56.7322	-55.5115	-55.6123	-56.7627
60.3	-56.7017	-55.3284	-55.3987	-56.7017
60.35	-56.6711	-55.4504	-55.7649	-56.5796
60.4	-56.6406	-55.6641	-55.6123	-56.7932
60.45	-56.7932	-55.481	-55.4902	-56.9458
60.5	-56.8237	-55.5115	-55.6123	-56.7932
60.55	-56.8542	-55.4199	-55.6428	-56.7322
60.6	-56.8542	-55.5115	-55.7344	-56.6406
60.65	-56.7017	-55.5725	-55.5818	-56.8542
60.7	-56.6406	-55.6335	-55.5513	-56.9458
60.75	-56.7627	-55.5725	-55.7649	-56.7932
60.8	-56.8542	-55.5115	-55.7344	-56.8848
60.85	-56.9153	-55.3894	-55.3376	-56.7322
60.9	-56.7932	-55.5115	-55.6428	-56.6711
60.95	-56.9458	-55.603	-55.6733	-56.9763
61	-56.7932	-55.603	-55.5818	-56.9763
61.05	-56.6101	-55.5725	-55.5818	-56.9763
61.1	-56.7322	-55.4504	-55.6733	-56.8542
61.15	-57.0068	-55.3589	-55.6428	-56.6711
61.2	-56.9763	-55.7251	-55.5818	-56.8848
61.25	-56.9153	-55.6641	-55.7954	-57.1289
61.3	-56.9458	-55.5725	-55.6733	-57.0068
61.35	-56.8848	-55.5115	-55.4902	-57.0068
61.4	-56.7627	-55.481	-55.887	-56.9458
61.45	-56.6711	-55.4199	-55.7344	-56.9153
61.5	-56.8542	-55.6641	-55.5818	-56.9763
61.55	-57.0374	-55.7861	-55.6428	-57.1289
61.6	-56.9458	-55.7556	-55.7649	-57.1289
61.65	-56.9153	-55.6335	-55.7039	-57.1899
61.7	-56.9153	-55.542	-55.4597	-57.0984
61.75	-56.9763	-55.5115	-55.7649	-57.0068
61.8	-56.8542	-55.7556	-55.7039	-57.0068
61.85	-56.7627	-55.9082	-55.6123	-57.1899
61.9	-56.9153	-55.8777	-55.5207	-57.2205
61.95	-57.1899	-55.7556	-55.887	-57.1289
62	-56.9458	-55.8166	-55.7344	-57.1594
62.05	-56.9458	-55.6946	-55.5818	-57.0374
62.1	-56.7627	-55.6335	-55.5818	-56.9763
62.15	-57.1289	-55.7251	-55.8564	-56.9458
62.2	-57.0984	-56.0303	-55.7039	-57.2205
62.25	-57.0374	-55.8472	-55.5513	-57.2815
62.3	-56.7932	-55.7556	-55.7039	-57.0984
62.35	-57.1899	-55.8777	-55.8259	-57.1289
62.4	-57.1289	-55.9082	-55.7039	-57.0679
62.45	-56.9153	-55.6641	-55.5513	-56.9153
62.5	-57.1594	-55.8166	-55.7649	-56.9153
62.55	-57.251	-55.9387	-55.887	-57.0679
62.6	-57.0068	-56.1523	-55.7344	-57.1899
62.65	-57.2815	-55.9692	-55.4902	-57.2815
62.7	-57.251	-55.9387	-55.8564	-57.0679
62.75	-57.0984	-55.9998	-55.8564	-57.1289
62.8	-57.3425	-56.0608	-55.8259	-57.0984
62.85	-57.251	-55.8777	-55.5513	-57.0068
62.9	-57.312	-55.8777	-55.887	-56.8848
62.95	-57.4341	-56.0608	-56.009	-57.0068
63	-57.1594	-56.2744	-55.7954	-57.2205
63.05	-57.4951	-56.2439	-55.6733	-57.2205
63.1	-57.4646	-56.1523	-55.7649	-57.0068
63.15	-57.373	-56.1829	-55.9785	-57.0679
63.2	-57.5561	-56.2744	-55.887	-57.0679
63.25	-57.373	-56.1523	-55.7649	-57.0068
63.3	-57.5867	-55.9692	-55.6428	-56.8848
63.35	-57.5867	-55.9998	-55.9785	-56.8237
63.4	-57.2205	-56.2134	-55.8259	-56.9153
63.45	-57.6172	-56.3354	-55.7954	-57.1594
63.5	-57.5561	-56.3965	-55.5207	-57.0984
63.55	-57.4341	-56.2744	-55.948	-57.0374
63.6	-57.6477	-56.366	-55.8564	-57.0984
63.65	-57.5867	-56.2744	-55.8259	-57.0068
63.7	-57.4036	-56.2439	-55.6123	-56.7932
63.75	-57.7393	-56.0608	-55.6733	-57.0984
63.8	-57.5867	-56.3965	-55.8259	-57.1594
63.85	-57.4646	-56.427	-55.7954	-57.1289
63.9	-57.5561	-56.4575	-55.7344	-56.8237
63.95	-57.6172	-56.3049	-55.7039	-57.1899
64	-57.3425	-56.2744	-55.7039	-57.1289
64.05	-57.7087	-56.488	-55.9175	-57.0374
64.1	-57.6172	-56.4575	-55.7649	-56.9153
64.15	-57.3425	-56.366	-55.887	-57.1899
64.2	-57.6782	-56.4575	-55.6428	-56.9763
64.25	-57.6477	-56.488	-55.7954	-56.9763
64.3	-57.3425	-56.488	-55.8564	-57.1594
64.35	-57.6477	-56.3049	-55.9175	-57.0679
64.4	-57.6477	-56.7017	-55.7954	-57.0068
64.45	-57.5256	-56.5186	-55.6428	-57.1289
64.5	-57.312	-56.427	-55.7039	-56.9763
64.55	-57.6477	-56.6711	-56.0395	-57.0984
64.6	-57.4646	-56.5796	-55.887	-57.0679
64.65	-57.373	-56.4575	-55.887	-56.8848
64.7	-57.4951	-56.6101	-55.8259	-57.251
64.75	-57.5867	-56.5186	-55.7649	-57.0984
64.8	-57.373	-56.7932	-55.8259	-56.9153
64.85	-57.251	-56.7017	-56.009	-57.251
64.9	-57.4951	-56.5186	-55.8564	-57.0679
64.95	-57.4951	-56.7627	-55.9175	-57.1899
65	-57.2205	-56.8848	-55.7954	-57.1289
65.05	-57.4036	-56.5186	-55.7954	-57.0374
65.1	-57.4341	-56.8237	-56.0701	-57.251
65.15	-57.4646	-56.7322	-56.1311	-57.1899
65.2	-57.1289	-56.7932	-55.9175	-56.9153
65.25	-57.5256	-56.8848	-56.009	-57.312
65.3	-57.312	-56.7017	-55.7649	-57.1594
65.35	-57.312	-56.7932	-55.948	-57.0068
65.4	-57.1289	-56.9153	-56.0701	-57.251
65.45	-57.373	-56.7932	-56.1311	-57.3425
65.5	-57.2815	-56.8848	-56.0701	-57.0068
65.55	-57.1899	-56.9153	-56.1311	-57.251
65.6	-57.0984	-56.9458	-55.8259	-57.2205
65.65	-57.373	-56.7017	-55.8259	-57.1899
65.7	-57.251	-57.0374	-56.009	-57.1289
65.75	-57.1289	-56.9763	-56.2227	-57.3425
65.8	-57.0984	-56.7627	-56.0395	-57.2815
65.85	-57.373	-57.0374	-56.1006	-57.1289
65.9	-57.2205	-56.9763	-56.0395	-57.312
65.95	-57.1289	-56.9153	-55.948	-57.312
66	-57.0374	-56.9763	-55.887	-57.1594
66.05	-57.2205	-57.1899	-56.1311	-57.312
66.1	-57.1289	-57.0679	-56.1616	-57.3425
66.15	-57.0374	-56.8237	-56.1311	-57.3425
66.2	-56.9763	-57.1594	-56.009	-57.1594
66.25	-57.1899	-57.0374	-56.0395	-57.4341
66.3	-57.0068	-57.0679	-55.8259	-57.312
66.35	-57.0068	-56.8237	-55.9175	-57.3425
66.4	-56.7932	-57.251	-55.9785	-57.251
66.45	-57.0068	-57.0679	-56.0701	-57.4646
66.5	-56.9763	-56.9763	-56.009	-57.373
66.55	-56.9153	-56.9153	-56.0395	-57.251
66.6	-56.7322	-57.1899	-55.9785	-57.3425
66.65	-56.8848	-57.0374	-55.8564	-57.5561
66.7	-56.9763	-56.7932	-55.7344	-57.4341
66.75	-56.9763	-56.9763	-55.7954	-57.1899
66.8	-56.7627	-57.251	-55.7954	-57.373
66.85	-56.7017	-57.0679	-55.948	-57.5561
66.9	-56.8542	-56.9458	-55.948	-57.4036
66.95	-56.9153	-57.0374	-56.009	-57.1594
67	-56.7627	-57.1899	-55.8564	-57.4646
67.05	-56.6711	-57.0984	-55.8564	-57.5867
67.1	-56.6711	-56.8542	-55.7649	-57.4341
67.15	-56.8848	-57.0374	-55.7039	-57.2205
67.2	-56.7627	-57.2205	-55.6123	-57.4646
67.25	-56.7627	-57.0068	-55.7344	-57.5561
67.3	-56.5491	-56.9153	-55.887	-57.5256
67.35	-56.6711	-56.8237	-55.887	-57.251
67.4	-56.8542	-57.1899	-55.7344	-57.373
67.45	-56.7932	-56.8848	-55.6123	-57.5867
67.5	-56.6711	-56.8542	-55.5818	-57.5256
67.55	-56.5491	-56.7322	-55.7344	-57.4341
67.6	-56.6406	-57.0374	-55.7649	-57.4036
67.65	-56.7932	-56.8542	-55.6428	-57.7393
67.7	-56.6711	-56.8237	-55.4292	-57.5561
67.75	-56.7017	-56.6101	-55.7039	-57.4951
67.8	-56.5796	-56.8237	-55.6428	-57.251
67.85	-56.488	-56.7627	-55.5513	-57.5867
67.9	-56.7017	-56.7932	-55.4597	-57.6172
67.95	-56.7322	-56.6406	-55.7039	-57.5867
68	-56.6711	-56.6711	-55.5513	-57.4951
68.05	-56.6406	-56.7932	-55.2766	-57.4341
68.1	-56.427	-56.7322	-55.6123	-57.6172
68.15	-56.6101	-56.5491	-55.5513	-57.4646
68.2	-56.7322	-56.5186	-55.4292	-57.4951
68.25	-56.6711	-56.6406	-55.6123	-57.3425
68.3	-56.6406	-56.7627	-55.4597	-57.4646
68.35	-56.6101	-56.5796	-55.5818	-57.5867
68.4	-56.4575	-56.6101	-55.6123	-57.5561
68.45	-56.6101	-56.3354	-55.3987	-57.4951
68.5	-56.7627	-56.5491	-55.6733	-57.312
68.55	-56.7017	-56.6101	-55.6428	-57.5256
68.6	-56.6711	-56.5796	-55.3987	-57.5867
68.65	-56.5491	-56.3965	-55.7039	-57.5867
68.7	-56.427	-56.3049	-55.4902	-57.4951
68.75	-56.5796	-56.427	-55.7344	-57.2205
68.8	-56.7322	-56.5491	-55.6123	-57.5561
68.85	-56.7322	-56.366	-55.3682	-57.6477
68.9	-56.6406	-56.427	-55.7344	-57.5256
68.95	-56.6406	-56.2134	-55.7039	-57.4341
69	-56.5491	-56.366	-55.3682	-57.373
69.05	-56.488	-56.4575	-55.6733	-57.4341
69.1	-56.6406	-56.427	-55.6428	-57.6172
69.15	-56.8237	-56.3965	-55.4597	-57.4951
69.2	-56.7017	-56.2744	-55.7649	-57.4646
69.25	-56.6711	-56.1829	-55.6733	-57.373
69.3	-56.5796	-56.488	-55.3682	-57.1899
69.35	-56.5491	-56.3965	-55.8564	-57.4951
69.4	-56.4575	-56.366	-55.6733	-57.4951
69.45	-56.6406	-56.3354	-55.5818	-57.4341
69.5	-56.7627	-56.1218	-55.7039	-57.3425
69.55	-56.7932	-56.1523	-55.8259	-57.1594
69.6	-56.6711	-56.488	-55.6123	-57.251
69.65	-56.6711	-56.488	-55.6428	-57.4341
69.7	-56.6406	-56.366	-55.8259	-57.4036
69.75	-56.5186	-56.3049	-55.7954	-57.2815
69.8	-56.5186	-56.1829	-55.4902	-57.312
69.85	-56.6101	-56.1523	-55.887	-57.1289
69.9	-56.6711	-56.427	-55.8259	-57.0068
69.95	-56.7322	-56.4575	-55.7649	-57.2205
70	-56.6406	-56.366	-55.7039	-57.373
70.05	-56.6711	-56.427	-55.9175	-57.251
70.1	-56.5796	-56.2134	-55.8259	-57.2205
70.15	-56.427	-56.1523	-55.7344	-57.1594
70.2	-56.5796	-56.3354	-55.9175	-56.9763
70.25	-56.6711	-56.366	-55.887	-57.2205
70.3	-56.7017	-56.427	-55.8564	-57.312
70.35	-56.6101	-56.3049	-55.7954	-57.2205
70.4	-56.6101	-56.366	-55.9785	-57.2205
70.45	-56.488	-56.2744	-55.948	-57.2815
70.5	-56.7322	-56.0303	-55.8564	-57.1594
70.55	-56.7017	-56.2439	-55.948	-57.0068
70.6	-56.6101	-56.3965	-56.0701	-57.1289
70.65	-56.5186	-56.366	-55.9175	-57.312
70.7	-56.7932	-56.2744	-55.887	-57.312
70.75	-56.7322	-56.3354	-56.0395	-57.1899
70.8	-56.5491	-56.2744	-56.1006	-57.2205
70.85	-56.8237	-56.1523	-56.0395	-57.2205
70.9	-56.7627	-56.1218	-55.887	-57.0984
70.95	-56.5491	-56.3354	-56.0395	-56.9763
71	-56.8542	-56.4575	-56.1921	-57.1289
71.05	-56.6711	-56.427	-56.1006	-57.312
71.1	-56.5186	-56.3049	-55.9785	-57.3425
71.15	-56.7322	-56.2744	-56.2227	-57.251
71.2	-56.6711	-56.3049	-56.2227	-57.1594
71.25	-56.7932	-56.2134	-56.1921	-57.2205
71.3	-56.7322	-56.0303	-56.009	-57.0984
71.35	-56.4575	-56.1829	-56.1311	-56.9458
71.4	-56.8237	-56.2439	-56.2532	-56.9763
71.45	-56.5796	-56.3965	-56.2532	-57.2205
71.5	-56.7017	-56.2744	-56.1311	-57.251
71.55	-56.7017	-56.2134	-56.1006	-57.312
71.6	-56.427	-56.2134	-56.3142	-57.1899
71.65	-56.7322	-56.2134	-56.3142	-57.1899
71.7	-56.6406	-56.0913	-56.2837	-57.1594
71.75	-56.5491	-56.0608	-56.1006	-57.0374
71.8	-56.7627	-55.9998	-56.3447	-57.0374
71.85	-56.5491	-56.1523	-56.4668	-57.0679
71.9	-56.5796	-56.2439	-56.3447	-57.1899
71.95	-56.7017	-56.1829	-56.3447	-57.1899
72	-56.5796	-56.1218	-56.1616	-57.1289
72.05	-56.6101	-56.1523	-56.5278	-57.1289
72.1	-56.6406	-55.9998	-56.4973	-56.8237
72.15	-56.5491	-55.9082	-56.5278	-57.0984
72.2	-56.6406	-56.1523	-56.3447	-57.1594
72.25	-56.6406	-56.1523	-56.3142	-57.1289
72.3	-56.5186	-56.0303	-56.5583	-56.8848
72.35	-56.6101	-55.9082	-56.5278	-57.0679
72.4	-56.7322	-56.0608	-56.5583	-57.1289
72.45	-56.5491	-56.0913	-56.4363	-57.0374
72.5	-56.4575	-55.9692	-56.5889	-57.0679
72.55	-56.7017	-55.8166	-56.8025	-57.1289
72.6	-56.7322	-56.0913	-56.6499	-57.0374
72.65	-56.366	-56.0303	-56.6194	-57.0679
72.7	-56.7017	-55.6641	-56.5889	-57.0984
72.75	-56.6101	-56.0608	-56.6499	-56.9153
72.8	-56.5796	-55.9387	-56.772	-57.1899
72.85	-56.5186	-55.6641	-56.7415	-57.1594
72.9	-56.7627	-56.0608	-56.7415	-56.8542
72.95	-56.6711	-55.9082	-56.6804	-57.1594
73	-56.427	-55.7861	-56.5278	-57.1594
73.05	-56.7017	-56.0303	-56.833	-57.0374
73.1	-56.6406	-55.7556	-56.833	-57.2205
73.15	-56.488	-55.9082	-56.8025	-57.0679
73.2	-56.6406	-55.8472	-56.7415	-57.2205
73.25	-56.6406	-55.7251	-56.5583	-57.251
73.3	-56.6406	-55.9692	-56.6194	-57.0068
73.35	-56.4575	-55.8777	-56.9551	-57.2815
73.4	-56.7627	-55.6641	-56.7109	-57.251
73.45	-56.6711	-55.9082	-56.7109	-57.0068
73.5	-56.488	-55.7861	-56.6194	-57.2815
73.55	-56.427	-55.6641	-56.5278	-57.1594
73.6	-56.7932	-55.8777	-56.6804	-57.0374
73.65	-56.6711	-55.7861	-56.8025	-57.251
73.7	-56.5186	-55.603	-56.7415	-57.2205
73.75	-56.488	-55.7861	-56.772	-56.9763
73.8	-56.7322	-55.7251	-56.6194	-57.373
73.85	-56.6406	-55.5725	-56.5583	-57.2205
73.9	-56.488	-55.8472	-56.5889	-56.9458
73.95	-56.5491	-55.6641	-56.894	-57.2815
74	-56.7017	-55.4504	-56.8635	-57.2205
74.05	-56.5491	-55.8472	-56.7109	-57.0984
74.1	-56.366	-55.6641	-56.7415	-57.1594
74.15	-56.5491	-55.5115	-56.7109	-57.1899
74.2	-56.7627	-55.6641	-56.4668	-57.1899
74.25	-56.6406	-55.7861	-56.772	-57.0068
74.3	-56.4575	-55.5725	-56.772	-57.2815
74.35	-56.5186	-55.4504	-56.9551	-57.251
74.4	-56.7627	-55.7251	-56.7415	-56.9763
74.45	-56.488	-55.7251	-56.7415	-57.1899
74.5	-56.4575	-55.5115	-56.6804	-57.251
74.55	-56.427	-55.603	-56.5889	-57.1289
74.6	-56.7017	-55.7556	-56.5583	-56.9458
74.65	-56.4575	-55.6335	-56.772	-57.2205
74.7	-56.4575	-55.3894	-56.8025	-57.1594
74.75	-56.3354	-55.6641	-56.833	-57.0374
74.8	-56.7017	-55.6641	-56.772	-56.9763
74.85	-56.5491	-55.5725	-56.6194	-57.251
74.9	-56.4575	-55.3894	-56.5583	-57.1899
74.95	-56.366	-55.6946	-56.5278	-56.9153
75	-56.5186	-55.5725	-56.5278	-57.0984
75.05	-56.5796	-55.5115	-56.6804	-57.251
75.1	-56.488	-55.3589	-56.6804	-57.1289
75.15	-56.3965	-55.6946	-56.7415	-56.9458
75.2	-56.3049	-55.5115	-56.6499	-57.0984
75.25	-56.5186	-55.4504	-56.6194	-57.2205
75.3	-56.5186	-55.3894	-56.4973	-57.1594
75.35	-56.427	-55.5725	-56.5278	-56.8237
75.4	-56.2744	-55.481	-56.2532	-57.1289
75.45	-56.2744	-55.3894	-56.5278	-57.1594
75.5	-56.5186	-55.2673	-56.5889	-57.1289
75.55	-56.366	-55.481	-56.7415	-56.8848
75.6	-56.3965	-55.3894	-56.5583	-57.0068
75.65	-56.1523	-55.3284	-56.5889	-57.0984
75.7	-56.3049	-55.1147	-56.4668	-57.0068
75.75	-56.488	-55.4199	-56.4058	-56.8237
75.8	-56.427	-55.3589	-56.4058	-56.9458
75.85	-56.3354	-55.3894	-56.6499	-57.0374
75.9	-56.1218	-55.0842	-56.4363	-56.9763
75.95	-56.2134	-55.3284	-56.5278	-56.8237
76	-56.4575	-55.3894	-56.3142	-56.7627
76.05	-56.3354	-55.2978	-56.6499	-57.1289
76.1	-56.3965	-55.0232	-56.4973	-56.8848
76.15	-56.2439	-55.2063	-56.5278	-56.9153
76.2	-56.2134	-55.3589	-56.4058	-56.6711
76.25	-56.3965	-55.2978	-56.6499	-56.9153
76.3	-56.488	-55.1758	-56.4363	-57.0068
76.35	-56.4575	-54.9316	-56.3752	-56.9458
76.4	-56.488	-55.2673	-56.5583	-56.9153
76.45	-56.2439	-55.3284	-56.4363	-56.8237
76.5	-56.427	-55.2063	-56.2837	-57.0374
76.55	-56.5491	-55.0842	-56.4973	-56.9153
76.6	-56.5491	-55.0842	-56.1921	-56.8848
76.65	-56.488	-55.3284	-56.4668	-56.7627
76.7	-56.488	-55.2063	-56.4058	-56.8542
76.75	-56.2439	-55.1453	-56.1616	-57.0374
76.8	-56.5186	-55.0537	-56.4058	-56.9458
76.85	-56.5796	-55.1758	-56.3142	-56.9458
76.9	-56.6711	-55.2368	-56.1616	-56.6711
76.95	-56.5491	-55.1758	-56.4058	-56.9153
77	-56.5796	-55.2063	-56.1921	-57.0984
77.05	-56.4575	-55.0842	-56.2837	-56.9763
77.1	-56.5796	-55.0232	-56.2837	-56.9763
77.15	-56.7017	-55.3284	-56.1311	-56.8237
77.2	-56.8542	-55.1147	-56.4058	-56.9153
77.25	-56.7017	-55.2673	-56.2837	-57.0984
77.3	-56.7322	-54.9927	-56.1311	-56.9763
77.35	-56.6711	-55.0232	-56.5583	-57.0068
77.4	-56.488	-55.2063	-56.3447	-56.8848
77.45	-56.6101	-55.2368	-56.1311	-56.8542
77.5	-56.8848	-55.2063	-56.4973	-57.0984
77.55	-56.8237	-55.0537	-56.4668	-57.0984
77.6	-56.7627	-54.9316	-56.0701	-57.0679
77.65	-56.7932	-55.1147	-56.4973	-57.0374
77.7	-56.7322	-55.2368	-56.4058	-56.8848
77.75	-56.5796	-55.1147	-56.1921	-57.0068
77.8	-56.6101	-55.1147	-56.4668	-57.1899
77.85	-56.7932	-55.0842	-56.4363	-57.1594
77.9	-56.9763	-54.8401	-56.3142	-57.2205
77.95	-56.9153	-55.0842	-56.4668	-57.0984
78	-56.7932	-55.2063	-56.5583	-57.0374
78.05	-56.7932	-55.1147	-56.4363	-57.1594
78.1	-56.7627	-55.1147	-56.1921	-57.312
78.15	-56.6101	-55.0537	-56.5889	-57.2205
78.2	-56.7322	-54.779	-56.4363	-57.312
78.25	-56.8542	-55.1453	-56.2227	-57.2815
78.3	-57.0374	-55.1758	-56.4668	-57.1289
78.35	-56.9153	-55.1453	-56.5889	-57.2205
78.4	-56.8848	-55.1453	-56.4363	-57.4036
78.45	-56.8848	-55.1147	-56.2532	-57.4341
78.5	-56.8542	-54.9622	-56.5889	-57.312
78.55	-56.6711	-54.9316	-56.5889	-57.373
78.6	-56.8237	-55.1758	-56.3752	-57.251
78.65	-56.9458	-55.2978	-56.3752	-57.251
78.7	-56.8542	-55.2063	-56.6194	-57.373
78.75	-56.8848	-55.2063	-56.5278	-57.5256
78.8	-56.6711	-55.1453	-56.3142	-57.4951
78.85	-56.8237	-55.0537	-56.5889	-57.4341
78.9	-56.9153	-54.9622	-56.5583	-57.4646
78.95	-56.7627	-55.2978	-56.6194	-57.373
79	-56.6101	-55.3894	-56.3447	-57.251
79.05	-56.8848	-55.3589	-56.5583	-57.4951
79.1	-56.8237	-55.3589	-56.6499	-57.5867
79.15	-56.5491	-55.2673	-56.5583	-57.4951
79.2	-56.8542	-55.2368	-56.3447	-57.4036
79.25	-56.7017	-55.1453	-56.6499	-57.5256
79.3	-56.5186	-55.2368	-56.6194	-57.4951
79.35	-56.8542	-55.4199	-56.5583	-57.3425
79.4	-56.6406	-55.5115	-56.2837	-57.2205
79.45	-56.6101	-55.481	-56.5889	-57.4036
79.5	-56.8542	-55.3589	-56.5889	-57.5867
79.55	-56.6101	-55.542	-56.5889	-57.6172
79.6	-56.8542	-55.4504	-56.3447	-57.6477
79.65	-56.7322	-55.4504	-56.5583	-57.5561
79.7	-56.5491	-55.3589	-56.6804	-57.4951
79.75	-56.8848	-55.481	-56.5889	-57.4951
79.8	-56.6711	-55.6641	-56.4668	-57.3425
79.85	-56.7932	-55.8472	-56.4668	-57.312
79.9	-56.7932	-55.8166	-56.6499	-57.4341
79.95	-56.6406	-55.7251	-56.5583	-57.4951
80	-56.8542	-55.6946	-56.4973	-57.6477
80.05	-56.7322	-55.7556	-56.3447	-57.5256
80.1	-56.7322	-55.6641	-56.5889	-57.4341
80.15	-56.9458	-55.603	-56.6499	-57.4646
80.2	-56.7322	-55.6641	-56.6194	-57.373
80.25	-56.8237	-55.8166	-56.3752	-57.251
80.3	-56.9153	-55.9387	-56.4973	-57.4646
80.35	-56.7322	-55.9082	-56.7109	-57.5256
80.4	-56.8542	-55.8472	-56.4973	-57.4951
80.45	-56.8542	-55.8472	-56.4973	-57.373
80.5	-56.7932	-55.6335	-56.2837	-57.2205
80.55	-56.9153	-55.8777	-56.6194	-57.4951
80.6	-56.9458	-56.0303	-56.5889	-57.4341
80.65	-56.7627	-55.9692	-56.5583	-57.4341
80.7	-56.8848	-55.9082	-56.4973	-57.2205
80.75	-57.0068	-55.8472	-56.3142	-57.5561
80.8	-56.8237	-56.0913	-56.5278	-57.4951
80.85	-56.7017	-55.9998	-56.5278	-57.1289
80.9	-57.0679	-55.6946	-56.4363	-57.6172
80.95	-56.9763	-56.0608	-56.4668	-57.4036
81	-56.6711	-56.0608	-56.2837	-57.251
81.05	-57.0068	-55.8777	-56.5278	-57.5256
81.1	-56.8848	-56.0608	-56.5278	-57.4341
81.15	-56.8848	-56.1218	-56.5583	-57.3425
81.2	-56.8848	-55.7556	-56.4363	-57.5256
81.25	-57.0068	-56.2134	-56.1921	-57.312
81.3	-57.0068	-55.9998	-56.3752	-57.4951
81.35	-56.7932	-55.8777	-56.5889	-57.4951
81.4	-57.0374	-56.1829	-56.4668	-57.2205
81.45	-56.9458	-56.0303	-56.4973	-57.5867
81.5	-56.8237	-55.9692	-56.3752	-57.5256
81.55	-56.9763	-56.0913	-56.2532	-57.373
81.6	-57.0374	-55.9998	-56.4973	-57.5867
81.65	-56.9763	-56.1829	-56.4973	-57.4646
81.7	-56.7322	-56.0608	-56.3752	-57.5867
81.75	-57.1289	-55.8777	-56.4363	-57.5561
81.8	-56.9763	-56.2439	-56.1921	-57.4036
81.85	-56.9458	-56.1829	-56.1921	-57.6172
81.9	-56.8848	-55.9082	-56.3142	-57.5867
81.95	-57.2205	-56.3049	-56.3447	-57.4341
82	-57.1289	-56.2134	-56.2837	-57.6477
82.05	-57.0374	-55.9692	-56.2227	-57.6477
82.1	-57.0374	-56.3049	-55.948	-57.4951
82.15	-57.3425	-56.2744	-56.0701	-57.7087
82.2	-57.0679	-56.0303	-56.1921	-57.7087
82.25	-56.9458	-56.3965	-56.2532	-57.5561
82.3	-57.0984	-56.3049	-56.1921	-57.5867
82.35	-57.2815	-56.0608	-56.2532	-57.7393
82.4	-57.1594	-56.366	-55.9785	-57.6477
82.45	-56.8848	-56.3354	-55.9785	-57.4951
82.5	-57.0679	-56.2439	-56.009	-57.8003
82.55	-57.312	-56.1218	-56.2532	-57.7087
82.6	-57.1289	-56.4575	-56.1921	-57.6782
82.65	-56.8542	-56.3965	-56.0701	-57.6477
82.7	-57.0984	-56.0303	-56.0701	-57.7698
82.75	-57.2815	-56.3354	-56.009	-57.7087
82.8	-57.1289	-56.3354	-55.8564	-57.5561
82.85	-57.0374	-56.2439	-55.9785	-57.7698
82.9	-57.0374	-56.1523	-56.1311	-57.7698
82.95	-57.2815	-56.488	-56.1616	-57.5867
83	-57.0068	-56.427	-56.009	-57.6172
83.05	-56.9458	-56.2744	-56.0395	-57.8918
83.1	-56.8848	-56.2744	-56.009	-57.7393
83.15	-57.1899	-56.488	-55.8564	-57.5256
83.2	-57.0374	-56.427	-55.7954	-57.7393
83.25	-56.9153	-56.2134	-55.9175	-57.7698
83.3	-56.8542	-56.3049	-56.0701	-57.6477
83.35	-57.0984	-56.5186	-56.1311	-57.4951
83.4	-57.1289	-56.3965	-55.9175	-57.7698
83.45	-57.0984	-56.1829	-56.009	-57.7393
83.5	-56.9458	-56.427	-55.9175	-57.7087
83.55	-56.9153	-56.5491	-55.887	-57.4341
83.6	-57.0679	-56.488	-55.7649	-57.8003
83.65	-57.0068	-56.2439	-55.7344	-57.6782
83.7	-57.0679	-56.488	-55.887	-57.6782
83.75	-56.7932	-56.5186	-56.1006	-57.5256
83.8	-56.8237	-56.5186	-55.9785	-57.8003
83.85	-57.0984	-56.2744	-55.948	-57.7393
83.9	-57.0068	-56.4575	-55.948	-57.7087
83.95	-57.0374	-56.5796	-55.8259	-57.4951
84	-56.8237	-56.5796	-55.6733	-57.8003
84.05	-56.9458	-56.3049	-55.7039	-57.7698
84.1	-57.1899	-56.4575	-55.9175	-57.6477
84.15	-57.0984	-56.7322	-55.948	-57.5256
84.2	-57.0679	-56.6406	-55.8564	-57.7087
84.25	-56.8848	-56.427	-55.7954	-57.8003
84.3	-56.9763	-56.366	-55.7039	-57.6782
84.35	-57.251	-56.7322	-56.009	-57.4951
84.4	-57.0984	-56.6101	-55.8564	-57.5561
84.45	-57.0984	-56.5796	-55.7344	-57.7087
84.5	-57.0068	-56.427	-55.7344	-57.6477
84.55	-57.0068	-56.6406	-56.009	-57.5256
84.6	-57.0984	-56.7322	-55.8564	-57.373
84.65	-57.251	-56.5491	-55.7039	-57.6782
84.7	-57.1289	-56.4575	-55.887	-57.6477
84.75	-57.0984	-56.5186	-55.8259	-57.5256
84.8	-56.9153	-56.7322	-55.7344	-57.4341
84.85	-57.0374	-56.5796	-55.8564	-57.312
84.9	-57.2815	-56.5491	-55.6733	-57.6172
84.95	-57.2205	-56.427	-55.7954	-57.4646
85	-57.1594	-56.5796	-55.7344	-57.4951
85.05	-57.0374	-56.7322	-55.5818	-57.2815
85.1	-56.9763	-56.5796	-55.8564	-57.251
85.15	-57.1289	-56.5491	-55.7954	-57.4341
85.2	-57.1594	-56.4575	-55.5513	-57.373
85.25	-57.1289	-56.488	-55.7649	-57.2815
85.3	-57.1594	-56.6711	-55.6733	-57.1289
85.35	-57.0984	-56.6406	-55.7344	-57.2815
85.4	-56.8848	-56.5491	-55.7039	-57.4646
85.45	-56.9763	-56.3354	-55.5207	-57.2205
85.5	-57.251	-56.427	-55.8259	-57.251
85.55	-57.251	-56.7017	-55.7344	-57.0068
85.6	-57.0984	-56.6406	-55.3987	-57.1289
85.65	-57.0984	-56.488	-55.7954	-57.2815
85.7	-57.0068	-56.427	-55.7039	-57.1899
85.75	-57.0068	-56.427	-55.5207	-57.1594
85.8	-57.0374	-56.7017	-55.7649	-57.0068
85.85	-57.1899	-56.6406	-55.6428	-56.9153
85.9	-57.1594	-56.5796	-55.3071	-57.1594
85.95	-57.0679	-56.6101	-55.7344	-57.1594
86	-57.0068	-56.427	-55.6733	-57.0679
86.05	-56.9153	-56.5186	-55.3376	-56.9763
86.1	-56.8237	-56.7017	-55.7344	-56.8848
86.15	-57.0374	-56.7627	-55.6733	-56.9458
86.2	-57.0984	-56.7322	-55.5513	-57.1594
86.25	-57.0984	-56.5491	-55.5818	-57.0984
86.3	-57.0374	-56.4575	-55.6733	-56.8848
86.35	-57.1289	-56.6101	-55.6123	-56.8848
86.4	-56.9763	-56.7932	-55.3987	-56.7932
86.45	-56.8848	-56.7017	-55.7344	-56.8237
86.5	-56.8542	-56.6406	-55.6733	-56.9458
86.55	-56.9458	-56.6406	-55.4902	-56.9458
86.6	-57.0374	-56.5491	-55.7039	-56.9153
86.65	-57.0679	-56.4575	-55.8564	-56.7627
86.7	-57.0068	-56.7322	-55.6733	-56.7017
86.75	-56.9763	-56.8237	-55.5207	-56.6406
86.8	-56.7627	-56.6406	-55.8564	-56.8542
86.85	-56.7627	-56.7322	-55.8259	-56.7932
86.9	-56.7017	-56.6406	-55.7039	-56.7322
86.95	-56.9458	-56.3965	-55.7649	-56.6711
87	-56.8542	-56.7017	-55.948	-56.6711
87.05	-56.8237	-56.7017	-55.8564	-56.5796
87.1	-56.7627	-56.8542	-55.5818	-56.5186
87.15	-56.6101	-56.6406	-55.9175	-56.6406
87.2	-56.7627	-56.7627	-55.948	-56.7627
87.25	-56.6711	-56.6101	-55.8564	-56.7627
87.3	-56.6101	-56.427	-55.6733	-56.7627
87.35	-56.6711	-56.5796	-55.9785	-56.5796
87.4	-56.6711	-56.7017	-56.0701	-56.7322
87.45	-56.6101	-56.7322	-56.009	-56.488
87.5	-56.5186	-56.7627	-55.7649	-56.7017
87.55	-56.7627	-56.7017	-56.009	-56.8542
87.6	-56.5491	-56.6406	-56.0395	-56.9458
87.65	-56.5491	-56.5186	-56.0395	-56.7932
87.7	-56.6101	-56.366	-55.7649	-56.8237
87.75	-56.5796	-56.488	-56.1006	-56.8542
87.8	-56.6406	-56.6711	-56.1311	-56.7627
87.85	-56.6711	-56.6101	-56.0395	-56.6101
87.9	-56.3965	-56.6406	-55.7344	-56.7322
87.95	-56.7932	-56.6406	-56.1311	-56.8848
88	-56.5796	-56.6406	-56.1616	-57.0679
88.05	-56.5796	-56.488	-56.2227	-56.9153
88.1	-56.6711	-56.5186	-56.009	-56.9458
88.15	-56.4575	-56.3965	-56.0701	-56.8848
88.2	-56.7322	-56.427	-56.2837	-56.9153
88.25	-56.6101	-56.6711	-56.1311	-56.8542
88.3	-56.5491	-56.7322	-56.1006	-56.7322
88.35	-56.7322	-56.7322	-55.9785	-56.8237
88.4	-56.488	-56.7322	-56.2837	-57.0984
88.45	-56.6406	-56.6101	-56.3142	-57.0984
88.5	-56.7017	-56.6406	-56.1921	-57.0679
88.55	-56.427	-56.6406	-56.1006	-57.0374
88.6	-56.6711	-56.6406	-56.1616	-57.1899
88.65	-56.6406	-56.427	-56.4363	-56.9153
88.7	-56.4575	-56.6711	-56.2837	-57.0679
88.75	-56.7932	-56.8848	-56.2227	-57.251
88.8	-56.6406	-56.7322	-55.9785	-57.251
88.85	-56.4575	-56.7322	-56.3142	-57.0984
88.9	-56.7932	-56.488	-56.3447	-57.0374
88.95	-56.7017	-56.5796	-56.3447	-57.312
89	-56.5491	-56.7932	-56.1921	-57.3425
89.05	-56.7017	-56.6101	-56.1006	-57.1899
89.1	-56.7932	-56.5796	-56.3447	-57.373
89.15	-56.7322	-56.6406	-56.3752	-57.2205
89.2	-56.5796	-56.7322	-56.3447	-57.251
89.25	-56.7932	-56.5796	-56.1616	-57.312
89.3	-56.7932	-56.427	-56.0701	-57.373
89.35	-56.5186	-56.7017	-56.3447	-57.251
89.4	-56.8237	-56.6406	-56.4363	-57.4646
89.45	-56.6406	-56.3965	-56.2227	-57.4036
89.5	-56.5491	-56.6711	-56.2227	-57.2205
89.55	-56.7322	-56.5491	-56.1616	-57.4951
89.6	-56.6711	-56.4575	-56.3142	-57.4951
89.65	-56.6101	-56.6101	-56.3752	-57.251
89.7	-56.5186	-56.4575	-56.2837	-57.5561
89.75	-56.8848	-56.5796	-56.3142	-57.4036
89.8	-56.7627	-56.5491	-56.1616	-57.4951
89.85	-56.5796	-56.2439	-56.0701	-57.4951
89.9	-56.6711	-56.6101	-56.2532	-57.2205
89.95	-56.7627	-56.5186	-56.2837	-57.5867
90	-56.6406	-56.366	-56.2532	-57.5561
90.05	-56.4575	-56.5796	-56.1616	-57.2205
90.1	-56.7932	-56.427	-55.9785	-57.5867
90.15	-56.7322	-56.3965	-56.009	-57.4646
90.2	-56.5186	-56.5796	-56.3447	-57.312
90.25	-56.5186	-56.3354	-56.2227	-57.6477
90.3	-56.7932	-56.3965	-56.1311	-57.4646
90.35	-56.7017	-56.488	-56.0701	-57.251
90.4	-56.488	-56.3354	-55.948	-57.5867
90.45	-56.4575	-56.3049	-55.8564	-57.5561
90.5	-56.6711	-56.3965	-56.1921	-57.2205
90.55	-56.5796	-56.3354	-56.1311	-57.5867
90.6	-56.3965	-56.2439	-56.0701	-57.5256
90.65	-56.427	-56.3965	-55.9785	-57.2815
90.7	-56.6711	-56.3049	-56.009	-57.5256
90.75	-56.5796	-56.0608	-55.8259	-57.4951
90.8	-56.3049	-56.427	-55.9785	-57.312
90.85	-56.488	-56.2439	-56.1311	-57.4036
90.9	-56.6406	-56.1218	-56.1311	-57.4951
90.95	-56.5796	-56.3049	-56.0395	-57.4036
91	-56.3965	-56.4575	-55.948	-57.1899
91.05	-56.366	-56.2439	-55.887	-57.5561
91.1	-56.6406	-56.0608	-55.887	-57.373
91.15	-56.488	-56.366	-56.0395	-57.312
91.2	-56.3965	-56.3354	-56.1006	-57.2815
91.25	-56.3354	-56.1523	-56.1921	-57.4951
91.3	-56.6711	-56.1523	-56.0701	-57.4036
91.35	-56.5186	-56.427	-56.1311	-57.1899
91.4	-56.427	-56.366	-55.9785	-57.373
91.45	-56.3049	-56.0303	-55.948	-57.4646
91.5	-56.5796	-56.2744	-55.9175	-57.312
91.55	-56.5186	-56.3354	-55.9785	-57.0984
91.6	-56.3965	-56.2744	-56.1921	-57.4036
91.65	-56.2744	-55.9692	-56.1311	-57.4036
91.7	-56.5186	-56.3354	-56.1006	-57.251
91.75	-56.6406	-56.3354	-56.009	-57.1594
91.8	-56.427	-56.2439	-56.1006	-57.373
91.85	-56.4575	-55.9387	-55.948	-57.3425
91.9	-56.3049	-56.2744	-55.8259	-57.1594
91.95	-56.5186	-56.2439	-55.948	-57.0984
92	-56.4575	-56.1829	-55.9785	-57.3425
92.05	-56.4575	-55.9692	-56.1006	-57.2815
92.1	-56.3354	-56.2134	-56.1006	-57.1594
92.15	-56.2439	-56.1829	-56.0395	-57.0374
92.2	-56.427	-56.2134	-55.9785	-57.3425
92.25	-56.3965	-55.9692	-55.948	-57.312
92.3	-56.427	-56.1523	-55.8564	-57.1899
92.35	-56.3049	-56.2134	-55.7039	-57.0984
92.4	-56.2744	-56.2439	-56.0395	-57.373
92.45	-56.427	-55.9692	-56.0701	-57.2815
92.5	-56.427	-56.1523	-55.948	-57.2205
92.55	-56.3354	-56.3049	-55.887	-57.0068
92.6	-56.1829	-56.2439	-55.7039	-57.3425
92.65	-55.9998	-55.9692	-55.9175	-57.312
92.7	-56.427	-55.9998	-55.948	-57.312
92.75	-56.3049	-56.2439	-55.9175	-57.0679
92.8	-56.1523	-56.0608	-55.7649	-57.2205
92.85	-56.1523	-56.0303	-56.0701	-57.373
92.9	-56.0913	-55.8777	-55.948	-57.312
92.95	-56.2439	-56.1218	-55.7344	-57.1899
93	-56.366	-56.2134	-56.0395	-57.0984
93.05	-56.1829	-56.0303	-56.009	-57.312
93.1	-56.3049	-55.9387	-55.8259	-57.2815
93.15	-56.1829	-55.9998	-56.0701	-57.1594
93.2	-56.0608	-56.1829	-56.1006	-57.0984
93.25	-56.3049	-56.0608	-55.7039	-57.0984
93.3	-56.427	-55.9998	-56.0701	-57.3425
93.35	-56.2439	-55.9387	-55.887	-57.2205
93.4	-56.3049	-55.9387	-55.9785	-57.1289
93.45	-56.2134	-56.1218	-56.0395	-57.0068
93.5	-56.1523	-55.9998	-55.7649	-57.1899
93.55	-56.3354	-55.9998	-56.1006	-57.2815
93.6	-56.3354	-55.7861	-56.0395	-57.251
93.65	-56.2744	-55.8166	-55.7344	-57.2205
93.7	-56.366	-56.0303	-56.1921	-57.0984
93.75	-56.2134	-55.9692	-56.0395	-57.2205
93.8	-55.9692	-55.9387	-56.0395	-57.4036
93.85	-56.3049	-55.6946	-56.0701	-57.2815
93.9	-56.5491	-55.6641	-55.9785	-57.2815
93.95	-56.3965	-55.9692	-56.1616	-57.0984
94	-56.3965	-55.9692	-56.0701	-57.251
94.05	-56.2744	-55.8472	-55.887	-57.4341
94.1	-56.3354	-55.7861	-56.2227	-57.373
94.15	-56.2134	-55.6946	-56.1616	-57.4036
94.2	-56.3965	-55.9082	-56.0701	-57.312
94.25	-56.5491	-55.8777	-56.1311	-57.2205
94.3	-56.5796	-55.7251	-56.1616	-57.4341
94.35	-56.4575	-55.7556	-56.1311	-57.5867
94.4	-56.427	-55.6641	-56.1616	-57.4951
94.45	-56.427	-55.5725	-56.3142	-57.4951
94.5	-56.2439	-55.7861	-56.2837	-57.3425
94.55	-56.366	-55.9387	-56.0395	-57.3425
94.6	-56.5186	-55.6641	-56.4363	-57.6477
94.65	-56.6406	-55.603	-56.2837	-57.6477
94.7	-56.6406	-55.542	-56.009	-57.5561
94.75	-56.6101	-55.5725	-56.3142	-57.4951
94.8	-56.5491	-55.7861	-56.2837	-57.373
94.85	-56.488	-55.7861	-56.1921	-57.3425
94.9	-56.4575	-55.6946	-56.2227	-57.5867
94.95	-56.3965	-55.7861	-56.3752	-57.5867
95	-56.5491	-55.603	-56.4058	-57.6172
95.05	-56.6711	-55.4504	-56.0395	-57.5256
95.1	-56.7627	-55.6335	-56.4363	-57.4341
95.15	-56.488	-55.8166	-56.3752	-57.3425
95.2	-56.6406	-55.7861	-56.3447	-57.5256
95.25	-56.5491	-55.7251	-56.1006	-57.6477
95.3	-56.5491	-55.6946	-56.4668	-57.6477
95.35	-56.7322	-55.6946	-56.3447	-57.5561
95.4	-56.8542	-55.542	-56.2532	-57.5867
95.45	-56.7322	-55.6335	-56.2837	-57.5256
95.5	-56.6711	-55.7861	-56.4668	-57.373
95.55	-56.7932	-55.9082	-56.4668	-57.5867
95.6	-56.8848	-55.6946	-56.2837	-57.7698
95.65	-56.7627	-55.6946	-56.3447	-57.6477
95.7	-56.7017	-55.7251	-56.4363	-57.5561
95.75	-56.9458	-55.481	-56.4363	-57.5561
95.8	-56.8542	-55.6335	-56.2837	-57.5561
95.85	-56.6101	-55.7861	-56.4058	-57.3425
95.9	-57.0984	-55.8472	-56.4668	-57.4646
95.95	-56.9458	-55.8166	-56.4058	-57.5256
96	-56.6406	-55.7556	-56.2837	-57.7087
96.05	-56.9458	-55.7251	-56.3752	-57.4951
96.1	-56.9458	-55.6335	-56.4973	-57.6172
96.15	-56.8237	-55.603	-56.4668	-57.5561
96.2	-56.9763	-55.5725	-56.2837	-57.5256
96.25	-56.6711	-55.6946	-56.3142	-57.373
96.3	-57.0374	-55.8472	-56.5889	-57.4036
96.35	-56.9458	-55.8777	-56.4973	-57.4951
96.4	-56.7322	-55.7861	-56.4668	-57.5867
96.45	-57.0068	-55.7251	-56.2837	-57.5561
96.5	-56.8542	-55.6641	-56.5583	-57.5256
96.55	-56.9458	-55.6641	-56.4973	-57.4036
96.6	-57.0068	-55.481	-56.4973	-57.4036
96.65	-56.6711	-55.481	-56.3142	-57.2815
96.7	-57.1594	-55.603	-56.6194	-57.2205
96.75	-56.9153	-55.7251	-56.5278	-57.1289
96.8	-56.8848	-55.7556	-56.5889	-57.4341
96.85	-57.0374	-55.7556	-56.3142	-57.4646
96.9	-56.9763	-55.5115	-56.4668	-57.4646
96.95	-56.9153	-55.7556	-56.6804	-57.3425
97	-57.0068	-55.5725	-56.5889	-57.2815
97.05	-56.8542	-55.3589	-56.4668	-57.0984
97.1	-57.0068	-55.5115	-56.3142	-57.312
97.15	-56.9458	-55.8166	-56.5889	-57.373
97.2	-56.8542	-55.6335	-56.7109	-57.4036
97.25	-56.8848	-55.6335	-56.5583	-57.1289
97.3	-57.0374	-55.3894	-56.5583	-57.251
97.35	-56.8237	-55.6641	-56.4058	-57.312
97.4	-56.7932	-55.6946	-56.772	-57.3425
97.45	-57.0068	-55.603	-56.6804	-57.1289
97.5	-56.9153	-55.3589	-56.6804	-57.373
97.55	-56.5796	-55.8166	-56.5278	-57.1899
97.6	-56.9153	-55.6946	-56.4668	-57.0679
97.65	-56.7932	-55.481	-56.6499	-57.3425
97.7	-56.7322	-55.6946	-56.6499	-57.312
97.75	-56.7627	-55.7251	-56.6499	-57.1594
97.8	-56.7322	-55.4199	-56.5583	-57.4036
97.85	-56.5796	-55.6946	-56.2837	-57.2205
97.9	-56.6711	-55.7556	-56.6499	-57.312
97.95	-56.8237	-55.481	-56.7415	-57.2815
98	-56.7932	-55.7251	-56.6804	-57.0068
98.05	-56.427	-55.6641	-56.6194	-57.373
98.1	-56.7932	-55.481	-56.4973	-57.2815
98.15	-56.6406	-55.7861	-56.5583	-57.0374
98.2	-56.6101	-55.6335	-56.8635	-57.3425
98.25	-56.427	-55.6335	-56.7415	-57.1899
98.3	-56.7627	-55.6641	-56.7415	-57.251
98.35	-56.7017	-55.603	-56.6804	-57.2815
98.4	-56.3965	-55.7556	-56.5583	-57.1289
98.45	-56.5796	-55.7251	-56.7109	-57.312
98.5	-56.7017	-55.4199	-56.894	-57.251
98.55	-56.5491	-55.9082	-56.772	-57.0374
98.6	-56.3965	-55.6641	-56.7415	-57.3425
98.65	-56.7017	-55.4504	-56.6804	-57.2205
98.7	-56.6101	-55.7556	-56.5583	-57.0984
98.75	-56.5796	-55.6335	-56.6499	-57.3425
98.8	-56.4575	-55.3589	-56.833	-57.373
98.85	-56.6711	-55.7861	-56.8025	-57.1289
98.9	-56.5796	-55.6641	-56.7415	-57.251
98.95	-56.5186	-55.4504	-56.6804	-57.373
99	-56.427	-55.7251	-56.6194	-57.2815
99.05	-56.6406	-55.6335	-56.5889	-57.2205
99.1	-56.6101	-55.603	-56.7415	-57.4646
99.15	-56.488	-55.6335	-56.8635	-57.4341
99.2	-56.427	-55.6641	-56.772	-57.1899
99.25	-56.6711	-55.6335	-56.7109	-57.5256
99.3	-56.6406	-55.4199	-56.6499	-57.4341
99.35	-56.5186	-55.8777	-56.4668	-57.312
99.4	-56.4575	-55.6946	-56.6194	-57.4646
99.45	-56.7017	-55.6335	-56.6499	-57.5561
99.5	-56.6406	-55.603	-56.772	-57.4646
99.55	-56.5491	-55.8777	-56.6804	-57.2815
99.6	-56.3965	-55.7251	-56.6499	-57.6782
99.65	-56.7932	-55.481	-56.5278	-57.5561
99.7	-56.7017	-55.7556	-56.4363	-57.5561
99.75	-56.6406	-55.8777	-56.3142	-57.4646
99.8	-56.4575	-55.7556	-56.4668	-57.7393
99.85	-56.7017	-55.603	-56.5583	-57.5867
99.9	-56.8542	-55.8777	-56.5278	-57.4646
[truncated: 18,274 more rows]

## Sheet: Fig. 1 suppl 6d
speed	latency											Mean	Standard Deviation													Inset												Mean	Standard Deviation
												Statistics On Rows of B"latency"[5]:F[10]	Statistics On Rows of B"latency"[5]:F[10]													Slew rate												Statistics On Rows of B[5]:F[13]	Statistics On Rows of B[5]:F[13]
0												--	--													0												--	--
0.00125												--	--													0.0022												--	--
0.0015												--	--													0.003												--	--
0.003												--	--													0.00525												--	--
0.005	60	70	65	62.5	75	66.5	6.0208					66.5	6.0208													0.00875	90	95	75	75	83.75	83.75	--					83.75	8.92679
0.01	10	15	12.5	14	17	13.7	2.63629					13.7	2.63629													0.0175	75	65	55	45	60	60	--					60	11.1803
0.025	5	2.5	5	6	7.6	5.22	1.85526					5.22	1.85526													0.05	20	25	20	30	23.75	23.75	--					23.75	4.14578
0.05	1.5	1.5	1	1.7	2	1.54	0.364692					1.54	0.364692													0.1	7.5	8.5	12	15	9.5	10.5	--					10.5	3.02076
0.1	0.25	0.2	0.25	0.3	0.5	0.3	0.11726					0.3	0.11726													0.2	6.75	7.5	9	10	--	8.3125	--					8.3125	1.46309
0.2	0.1	0.1	0.05	0.1	0.05	0.08	0.0273861					0.08	0.0273861													0.4	6.5	-	8	7.5	8	7.5	--					7.5	0.707107
																										0.5	5.7	6	7	6.5	7.5	6.54						6.54	0.730068
																										0.75	4	4.5	6	4	5.75	4.85						4.85	0.961769
																										1	3.5	4.2	5.5	3	6	4.44						4.44	1.2818
