# Supplementary material for: Intrinsic mechanical sensitivity of mammalian auditory neurons as a contributor to sound-driven neural activity
Source: eLife. 2022 Mar 10;11:e74948. doi: 10.7554/eLife.74948 (PMC8942473; doi:10.7554/eLife.74948)
Supplement: Figure 1—figure supplement 7—source data 1. [file elife-74948-fig1-figsupp7-data1.xls]

## Sheet: Fig. 1 suppl Sa
t(ms)	17a06050							24						56					Figure 1- figure supplement 7
	500 nm/50Hz							700nm/50Hz						860nm					Mouse SGN response properties to sinusoidal mechanical and current stimulation.
0	-61.9507						0	-63.8123					0	-62.561
0.05	-63.7817						0.05	-63.6902					0.05	-64.0869
0.1	-61.3403						0.1	-63.5681					0.1	-65.6128
0.15	-64.0869						0.15	-63.5071					0.15	-62.8662
0.2	-62.561						0.2	-63.4155					0.2	-65.0024
0.25	-63.7817						0.25	-63.4766					0.25	-64.6973
0.3	-63.4766						0.3	-63.7207					0.3	-62.561
0.35	-62.2559						0.35	-63.7207					0.35	-65.0024
0.4	-63.7817						0.4	-63.6597					0.4	-65.0024
0.45	-61.3403						0.45	-63.6597					0.45	-62.2559
0.5	-63.4766						0.5	-63.446					0.5	-64.6973
0.55	-61.3403						0.55	-63.385					0.55	-65.6128
0.6	-64.6973						0.6	-63.4155					0.6	-62.2559
0.65	-62.2559						0.65	-63.5681					0.65	-64.0869
0.7	-64.3921						0.7	-63.6902					0.7	-65.6128
0.75	-61.3403						0.75	-63.6902					0.75	-62.8662
0.8	-65.6128						0.8	-63.5681					0.8	-65.3076
0.85	-62.561						0.85	-63.4766					0.85	-64.3921
0.9	-63.7817						0.9	-63.385					0.9	-63.1714
0.95	-61.3403						0.95	-63.2935					0.95	-64.0869
1	-64.6973						1	-63.3545					1	-65.0024
1.05	-62.561						1.05	-63.5071					1.05	-62.2559
1.1	-65.0024						1.1	-63.5986					1.1	-64.6973
1.15	-61.6455						1.15	-63.6902					1.15	-66.2231
1.2	-65.6128						1.2	-63.5681					1.2	-62.8662
1.25	-61.9507						1.25	-63.5986					1.25	-63.7817
1.3	-65.0024						1.3	-63.446					1.3	-65.918
1.35	-61.6455						1.35	-63.324					1.35	-63.1714
1.4	-65.0024						1.4	-63.1714					1.4	-63.4766
1.45	-62.2559						1.45	-63.2324					1.45	-65.918
1.5	-64.6973						1.5	-63.385					1.5	-62.8662
1.55	-61.3403						1.55	-63.5376					1.55	-65.3076
1.6	-64.6973						1.6	-63.5681					1.6	-64.3921
1.65	-62.2559						1.65	-63.5681					1.65	-63.7817
1.7	-64.3921						1.7	-63.4766					1.7	-65.6128
1.75	-60.4248						1.75	-63.5071					1.75	-63.1714
1.8	-63.7817						1.8	-63.446					1.8	-65.6128
1.85	-62.2559						1.85	-63.4155					1.85	-62.561
1.9	-63.7817						1.9	-63.2019					1.9	-65.3076
1.95	-62.8662						1.95	-63.1103					1.95	-62.8662
2	-63.4766						2	-63.324					2	-65.0024
2.05	-63.7817						2.05	-63.4766					2.05	-63.7817
2.1	-62.561						2.1	-63.5071					2.1	-65.3076
2.15	-63.1714						2.15	-63.385					2.15	-62.8662
2.2	-62.561						2.2	-63.2935					2.2	-65.0024
2.25	-64.6973						2.25	-63.1409					2.25	-62.8662
2.3	-61.6455						2.3	-63.4155					2.3	-65.3076
2.35	-64.3921						2.35	-63.446					2.35	-63.4766
2.4	-61.9507						2.4	-63.5071					2.4	-65.6128
2.45	-65.0024						2.45	-63.0798					2.45	-62.2559
2.5	-61.0352						2.5	-63.4155					2.5	-66.8335
2.55	-64.6973						2.55	-63.4766					2.55	-62.8662
2.6	-61.6455						2.6	-63.385					2.6	-65.6128
2.65	-64.0869						2.65	-63.2935					2.65	-63.1714
2.7	-61.3403						2.7	-63.5071					2.7	-65.3076
2.75	-63.1714						2.75	-63.324					2.75	-63.7817
2.8	-62.561						2.8	-63.324					2.8	-64.6973
2.85	-63.4766						2.85	-63.5681					2.85	-64.3921
2.9	-63.4766						2.9	-63.2324					2.9	-61.9507
2.95	-62.561						2.95	-63.2935					2.95	-64.3921
3	-65.0024						3	-63.5071					3	-62.8662
3.05	-62.561						3.05	-63.1409					3.05	-65.0024
3.1	-64.3921						3.1	-63.4155					3.1	-62.2559
3.15	-61.6455						3.15	-63.4766					3.15	-65.918
3.2	-64.6973						3.2	-63.0493					3.2	-62.8662
3.25	-61.3403						3.25	-63.5376					3.25	-65.918
3.3	-63.4766						3.3	-63.3545					3.3	-62.8662
3.35	-62.561						3.35	-63.1103					3.35	-65.918
3.4	-62.8662						3.4	-63.4766					3.4	-62.561
3.45	-63.7817						3.45	-63.324					3.45	-65.6128
3.5	-62.8662						3.5	-63.2629					3.5	-62.561
3.55	-64.0869						3.55	-63.4155					3.55	-65.6128
3.6	-61.3403						3.6	-63.1714					3.6	-63.1714
3.65	-63.7817						3.65	-63.385					3.65	-66.2231
3.7	-62.2559						3.7	-63.4155					3.7	-61.9507
3.75	-62.8662						3.75	-63.0493					3.75	-65.918
3.8	-62.2559						3.8	-63.4155					3.8	-62.8662
3.85	-62.561						3.85	-63.4155					3.85	-65.0024
3.9	-64.0869						3.9	-63.1409					3.9	-63.4766
3.95	-60.73						3.95	-63.2629					3.95	-65.3076
4	-63.4766						4	-63.446					4	-65.6128
4.05	-61.0352						4.05	-63.2629					4.05	-64.6973
4.1	-62.561						4.1	-63.0493					4.1	-65.6128
4.15	-63.7817						4.15	-63.4155					4.15	-63.7817
4.2	-60.4248						4.2	-63.324					4.2	-66.2231
4.25	-62.8662						4.25	-63.0493					4.25	-62.8662
4.3	-63.7817						4.3	-63.324					4.3	-65.0024
4.35	-61.0352						4.35	-63.3545					4.35	-63.1714
4.4	-62.561						4.4	-63.2324					4.4	-65.918
4.45	-64.0869						4.45	-63.0798					4.45	-64.0869
4.5	-61.3403						4.5	-63.446					4.5	-65.0024
4.55	-62.561						4.55	-63.2629					4.55	-65.918
4.6	-63.1714						4.6	-62.9883					4.6	-64.3921
4.65	-61.3403						4.65	-63.2324					4.65	-65.918
4.7	-62.561						4.7	-63.385					4.7	-63.1714
4.75	-63.7817						4.75	-63.1103					4.75	-66.8335
4.8	-60.1196						4.8	-62.9272					4.8	-63.1714
4.85	-62.2559						4.85	-63.2324					4.85	-65.3076
4.9	-64.0869						4.9	-63.2324					4.9	-63.4766
4.95	-62.2559						4.95	-63.1103					4.95	-65.3076
5	-61.3403						5	-62.8967					5	-65.918
5.05	-63.1714						5.05	-63.2629					5.05	-64.0869
5.1	-63.1714						5.1	-63.2629					5.1	-66.2231
5.15	-60.73						5.15	-62.9883					5.15	-64.0869
5.2	-63.1714						5.2	-62.8967					5.2	-65.6128
5.25	-64.0869						5.25	-63.2324					5.25	-63.1714
5.3	-61.9507						5.3	-63.1714					5.3	-65.0024
5.35	-62.8662						5.35	-63.0188					5.35	-66.2231
5.4	-64.0869						5.4	-62.8967					5.4	-64.6973
5.45	-61.3403						5.45	-63.2324					5.45	-66.2231
5.5	-62.8662						5.5	-63.2019					5.5	-62.2559
5.55	-63.7817						5.55	-62.9578					5.55	-65.6128
5.6	-61.6455						5.6	-62.8357					5.6	-63.7817
5.65	-62.561						5.65	-63.2019					5.65	-65.0024
5.7	-64.6973						5.7	-63.1409					5.7	-65.3076
5.75	-61.3403						5.75	-63.0798					5.75	-64.6973
5.8	-62.2559						5.8	-62.7747					5.8	-66.2231
5.85	-64.3921						5.85	-63.1714					5.85	-63.4766
5.9	-62.2559						5.9	-63.2629					5.9	-65.6128
5.95	-61.3403						5.95	-63.0798					5.95	-64.3921
6	-64.3921						6	-62.7747					6	-63.7817
6.05	-61.6455						6.05	-63.0798					6.05	-66.5283
6.1	-63.1714						6.1	-63.1714					6.1	-62.561
6.15	-63.4766						6.15	-63.1103					6.15	-65.6128
6.2	-62.8662						6.2	-62.9578					6.2	-63.4766
6.25	-62.561						6.25	-62.9883					6.25	-64.3921
6.3	-63.7817						6.3	-63.2019					6.3	-65.3076
6.35	-62.561						6.35	-63.1409					6.35	-63.1714
6.4	-61.9507						6.4	-63.1103					6.4	-66.2231
6.45	-63.7817						6.45	-62.8357					6.45	-63.1714
6.5	-63.7817						6.5	-63.0493					6.5	-64.6973
6.55	-61.0352						6.55	-63.2935					6.55	-65.6128
6.6	-63.1714						6.6	-63.1714					6.6	-64.3921
6.65	-63.4766						6.65	-63.1714					6.65	-66.8335
6.7	-61.6455						6.7	-62.8662					6.7	-62.8662
6.75	-63.7817						6.75	-63.1409					6.75	-65.0024
6.8	-63.4766						6.8	-63.2324					6.8	-65.6128
6.85	-61.3403						6.85	-63.2324					6.85	-63.4766
6.9	-63.4766						6.9	-63.1103					6.9	-65.3076
6.95	-63.4766						6.95	-62.9272					6.95	-63.4766
7	-62.2559						7	-63.1409					7	-64.6973
7.05	-64.3921						7.05	-63.3545					7.05	-66.8335
7.1	-61.6455						7.1	-63.2935					7.1	-62.561
7.15	-63.4766						7.15	-63.1409					7.15	-65.0024
7.2	-62.2559						7.2	-62.8052					7.2	-65.3076
7.25	-63.1714						7.25	-63.0798					7.25	-64.0869
7.3	-64.0869						7.3	-63.324					7.3	-66.5283
7.35	-61.6455						7.35	-63.2324					7.35	-61.9507
7.4	-64.0869						7.4	-63.1714					7.4	-65.6128
7.45	-62.561						7.45	-63.0493					7.45	-65.918
7.5	-64.0869						7.5	-63.0493					7.5	-63.7817
7.55	-61.0352						7.55	-63.1714					7.55	-64.6973
7.6	-64.6973						7.6	-63.324					7.6	-65.6128
7.65	-62.561						7.65	-63.2935					7.65	-63.7817
7.7	-63.7817						7.7	-63.0798					7.7	-66.2231
7.75	-62.561						7.75	-62.8967					7.75	-63.1714
7.8	-63.1714						7.8	-62.9883					7.8	-64.6973
7.85	-62.561						7.85	-63.2629					7.85	-66.8335
7.9	-63.1714						7.9	-63.324					7.9	-63.1714
7.95	-63.1714						7.95	-63.2019					7.95	-64.6973
8	-62.561						8	-63.0798					8	-66.2231
8.05	-63.1714						8.05	-62.8662					8.05	-63.7817
8.1	-61.9507						8.1	-62.9883					8.1	-64.6973
8.15	-62.8662						8.15	-63.2629					8.15	-65.3076
8.2	-61.6455						8.2	-63.2629					8.2	-63.1714
8.25	-62.561						8.25	-63.2324					8.25	-65.918
8.3	-61.6455						8.3	-63.1714					8.3	-64.3921
8.35	-64.6973						8.35	-63.0493					8.35	-63.4766
8.4	-62.2559						8.4	-62.9272					8.4	-65.3076
8.45	-64.3921						8.45	-63.1409					8.45	-64.0869
8.5	-62.561						8.5	-63.2324					8.5	-64.0869
8.55	-63.7817						8.55	-63.2629					8.55	-65.918
8.6	-62.561						8.6	-63.2019					8.6	-64.6973
8.65	-62.2559						8.65	-63.1103					8.65	-64.6973
8.7	-62.8662						8.7	-62.9578					8.7	-65.6128
8.75	-62.8662						8.75	-62.9272					8.75	-63.7817
8.8	-62.8662						8.8	-63.1103					8.8	-64.3921
8.85	-63.1714						8.85	-63.2019					8.85	-65.918
8.9	-63.4766						8.9	-63.324					8.9	-64.3921
8.95	-63.7817						8.95	-63.1714					8.95	-63.7817
9	-62.2559						9	-63.0798					9	-66.8335
9.05	-63.4766						9.05	-62.9578					9.05	-63.4766
9.1	-62.8662						9.1	-62.8662					9.1	-63.4766
9.15	-64.0869						9.15	-62.9272					9.15	-65.6128
9.2	-61.6455						9.2	-63.1409					9.2	-65.0024
9.25	-64.6973						9.25	-63.1409					9.25	-63.4766
9.3	-62.561						9.3	-63.2935					9.3	-65.3076
9.35	-65.0024						9.35	-63.2324					9.35	-65.0024
9.4	-61.3403						9.4	-63.1103					9.4	-63.7817
9.45	-63.7817						9.45	-62.8967					9.45	-65.0024
9.5	-62.8662						9.5	-62.9578					9.5	-65.3076
9.55	-64.0869						9.55	-62.8357					9.55	-62.8662
9.6	-61.3403						9.6	-62.9578					9.6	-65.3076
9.65	-63.4766						9.65	-63.0798					9.65	-65.3076
9.7	-64.3921						9.7	-63.2324					9.7	-63.1714
9.75	-63.1714						9.75	-63.2629					9.75	-65.3076
9.8	-64.0869						9.8	-63.1103					9.8	-65.0024
9.85	-61.9507						9.85	-63.0798					9.85	-63.7817
9.9	-65.0024						9.9	-63.1103					9.9	-65.918
9.95	-62.2559						9.95	-62.9578					9.95	-62.561
10	-63.1714						10	-62.8967					10	-64.3921
10.05	-62.561						10.05	-62.8662					10.05	-65.0024
10.1	-63.7817						10.1	-63.0493					10.1	-64.3921
10.15	-64.0869						10.15	-63.2629					10.15	-65.6128
10.2	-63.1714						10.2	-63.2629					10.2	-62.8662
10.25	-64.3921						10.25	-63.2019					10.25	-66.2231
10.3	-62.2559						10.3	-63.2629					10.3	-63.4766
10.35	-65.0024						10.35	-63.2019					10.35	-65.918
10.4	-60.73						10.4	-62.9578					10.4	-62.561
10.45	-63.4766						10.45	-62.8662					10.45	-65.918
10.5	-63.4766						10.5	-63.1714					10.5	-62.8662
10.55	-63.7817						10.55	-63.324					10.55	-66.2231
10.6	-63.7817						10.6	-63.1409					10.6	-62.561
10.65	-62.2559						10.65	-63.0493					10.65	-66.5283
10.7	-65.0024						10.7	-62.9578					10.7	-63.4766
10.75	-61.3403						10.75	-63.2629					10.75	-65.6128
10.8	-64.6973						10.8	-63.2019					10.8	-63.7817
10.85	-63.1714						10.85	-63.0798					10.85	-65.3076
10.9	-63.7817						10.9	-63.0798					10.9	-65.0024
10.95	-64.0869						10.95	-63.2935					10.95	-63.4766
11	-62.561						11	-63.1103					11	-64.3921
11.05	-65.0024						11.05	-63.0188					11.05	-63.7817
11.1	-61.6455						11.1	-63.385					11.1	-66.2231
11.15	-64.3921						11.15	-63.1409					11.15	-61.9507
11.2	-62.8662						11.2	-63.0493					11.2	-65.6128
11.25	-62.561						11.25	-63.2324					11.25	-64.3921
11.3	-64.6973						11.3	-63.0798					11.3	-65.918
11.35	-62.2559						11.35	-63.2019					11.35	-63.4766
11.4	-65.0024						11.4	-63.3545					11.4	-65.6128
11.45	-61.3403						11.45	-62.9578					11.45	-64.0869
11.5	-63.7817						11.5	-63.2935					11.5	-65.6128
11.55	-64.0869						11.55	-63.2324					11.55	-64.3921
11.6	-62.8662						11.6	-63.0188					11.6	-65.6128
11.65	-64.6973						11.65	-63.3545					11.65	-65.0024
11.7	-61.3403						11.7	-63.1714					11.7	-65.3076
11.75	-64.3921						11.75	-63.0493					11.75	-63.7817
11.8	-63.4766						11.8	-63.446					11.8	-65.3076
11.85	-62.561						11.85	-63.1409					11.85	-64.3921
11.9	-65.0024						11.9	-63.2019					11.9	-65.918
11.95	-62.2559						11.95	-63.324					11.95	-63.4766
12	-64.3921						12	-63.1409					12	-65.6128
12.05	-64.0869						12.05	-63.2019					12.05	-63.4766
12.1	-62.2559						12.1	-63.324					12.1	-66.5283
12.15	-65.918						12.15	-63.2019					12.15	-63.1714
12.2	-62.561						12.2	-63.2935					12.2	-66.2231
12.25	-64.0869						12.25	-63.4155					12.25	-62.561
12.3	-63.7817						12.3	-63.2019					12.3	-65.0024
12.35	-62.561						12.35	-63.1714					12.35	-62.2559
12.4	-65.3076						12.4	-63.5071					12.4	-65.3076
12.45	-62.8662						12.45	-63.3545					12.45	-64.0869
12.5	-63.1714						12.5	-63.0493					12.5	-64.6973
12.55	-64.3921						12.55	-63.446					12.55	-65.3076
12.6	-62.561						12.6	-63.5071					12.6	-64.3921
12.65	-64.0869						12.65	-63.2324					12.65	-66.5283
12.7	-63.1714						12.7	-63.2935					12.7	-62.8662
12.75	-63.1714						12.75	-63.6597					12.75	-65.3076
12.8	-65.918						12.8	-63.446					12.8	-62.561
12.85	-61.6455						12.85	-63.1409					12.85	-65.918
12.9	-63.4766						12.9	-63.4766					12.9	-63.4766
12.95	-64.6973						12.95	-63.6597					12.95	-64.3921
13	-62.561						13	-63.4155					13	-64.6973
13.05	-63.7817						13.05	-63.2629					13.05	-64.3921
13.1	-64.0869						13.1	-63.5986					13.1	-65.3076
13.15	-63.4766						13.15	-63.5986					13.15	-62.8662
13.2	-65.3076						13.2	-63.446					13.2	-65.6128
13.25	-61.6455						13.25	-63.324					13.25	-63.4766
13.3	-63.7817						13.3	-63.6291					13.3	-65.3076
13.35	-65.6128						13.35	-63.5986					13.35	-64.0869
13.4	-63.1714						13.4	-63.385					13.4	-63.4766
13.45	-63.7817						13.45	-63.4155					13.45	-65.3076
13.5	-64.3921						13.5	-63.6597					13.5	-63.1714
13.55	-62.8662						13.55	-63.6291					13.55	-65.6128
13.6	-64.3921						13.6	-63.4155					13.6	-62.2559
13.65	-64.0869						13.65	-63.4766					13.65	-65.0024
13.7	-62.2559						13.7	-63.8123					13.7	-63.1714
13.75	-64.3921						13.75	-63.5986					13.75	-64.3921
13.8	-64.0869						13.8	-63.446					13.8	-64.6973
13.85	-62.2559						13.85	-63.5071					13.85	-62.8662
13.9	-64.6973						13.9	-63.7512					13.9	-65.6128
13.95	-63.7817						13.95	-63.6902					13.95	-62.561
14	-62.8662						14	-63.6597					14	-64.6973
14.05	-64.6973						14.05	-63.4155					14.05	-62.561
14.1	-62.2559						14.1	-63.9038					14.1	-64.3921
14.15	-63.4766						14.15	-63.7207					14.15	-65.3076
14.2	-65.0024						14.2	-63.6597					14.2	-62.561
14.25	-61.9507						14.25	-63.4766					14.25	-65.0024
14.3	-62.561						14.3	-63.8123					14.3	-62.561
14.35	-65.918						14.35	-63.8428					14.35	-65.0024
14.4	-61.9507						14.4	-63.8428					14.4	-64.3921
14.45	-62.2559						14.45	-63.5071					14.45	-62.8662
14.5	-64.3921						14.5	-63.7512					14.5	-65.918
14.55	-63.7817						14.55	-63.9343					14.55	-62.8662
14.6	-62.2559						14.6	-63.9343					14.6	-64.6973
14.65	-64.0869						14.65	-63.6291					14.65	-63.1714
14.7	-63.4766						14.7	-63.5376					14.7	-64.3921
14.75	-62.561						14.75	-63.8733					14.75	-65.918
14.8	-64.0869						14.8	-63.9954					14.8	-63.1714
14.85	-64.0869						14.85	-63.9038					14.85	-64.6973
14.9	-61.0352						14.9	-63.6902					14.9	-63.7817
14.95	-64.0869						14.95	-63.7512					14.95	-65.0024
15	-64.0869						15	-64.0259					15	-64.6973
15.05	-61.6455						15.05	-63.9954					15.05	-62.2559
15.1	-63.4766						15.1	-63.8733					15.1	-65.0024
15.15	-64.0869						15.15	-63.6597					15.15	-64.6973
15.2	-61.6455						15.2	-63.7207					15.2	-63.7817
15.25	-64.0869						15.25	-64.0259					15.25	-65.918
15.3	-63.4766						15.3	-63.9343					15.3	-62.561
15.35	-62.2559						15.35	-63.9038					15.35	-65.6128
15.4	-65.0024						15.4	-63.7817					15.4	-64.6973
15.45	-61.9507						15.45	-63.7512					15.45	-64.0869
15.5	-62.8662						15.5	-63.9038					15.5	-66.5283
15.55	-62.561						15.55	-64.0259					15.55	-64.3921
15.6	-62.561						15.6	-63.9343					15.6	-65.0024
15.65	-64.6973						15.65	-63.7512					15.65	-66.5283
15.7	-61.6455						15.7	-63.5376					15.7	-63.4766
15.75	-64.3921						15.75	-63.9343					15.75	-65.3076
15.8	-62.561						15.8	-64.0564					15.8	-64.3921
15.85	-65.0024						15.85	-63.9038					15.85	-63.1714
15.9	-61.9507						15.9	-63.9343					15.9	-65.6128
15.95	-64.3921						15.95	-63.6291					15.95	-62.8662
16	-62.561						16	-63.6597					16	-64.0869
16.05	-65.0024						16.05	-63.9954					16.05	-65.3076
16.1	-61.9507						16.1	-64.0564					16.1	-62.8662
16.15	-64.3921						16.15	-63.9648					16.15	-65.0024
16.2	-63.1714						16.2	-63.9343					16.2	-65.3076
16.25	-64.3921						16.25	-63.7207					16.25	-62.561
16.3	-63.1714						16.3	-63.8123					16.3	-65.3076
16.35	-64.0869						16.35	-64.0564					16.35	-64.0869
16.4	-62.8662						16.4	-64.1785					16.4	-63.1714
16.45	-64.3921						16.45	-63.9648					16.45	-65.6128
16.5	-63.1714						16.5	-63.9648					16.5	-64.3921
16.55	-62.2559						16.55	-63.8123					16.55	-63.7817
16.6	-64.6973						16.6	-63.8428					16.6	-65.6128
16.65	-62.2559						16.65	-64.0259					16.65	-63.1714
16.7	-63.7817						16.7	-64.1174					16.7	-64.3921
16.75	-61.9507						16.75	-64.1174					16.75	-65.6128
16.8	-64.6973						16.8	-64.1479					16.8	-62.8662
16.85	-62.561						16.85	-63.9954					16.85	-64.0869
16.9	-64.6973						16.9	-63.8733					16.9	-65.6128
16.95	-62.2559						16.95	-63.7817					16.95	-63.1714
17	-65.0024						17	-64.0564					17	-64.3921
17.05	-63.1714						17.05	-64.1785					17.05	-65.3076
17.1	-65.0024						17.1	-64.1785					17.1	-62.8662
17.15	-63.1714						17.15	-64.0564					17.15	-64.6973
17.2	-64.3921						17.2	-64.0259					17.2	-66.2231
17.25	-62.8662						17.25	-63.9038					17.25	-62.2559
17.3	-64.0869						17.3	-63.7512					17.3	-63.4766
17.35	-62.8662						17.35	-63.9648					17.35	-65.918
17.4	-65.3076						17.4	-64.1479					17.4	-62.8662
17.45	-62.561						17.45	-64.2395					17.45	-64.0869
17.5	-64.6973						17.5	-64.0869					17.5	-65.0024
17.55	-61.6455						17.55	-64.1785					17.55	-63.1714
17.6	-65.0024						17.6	-64.0869					17.6	-64.0869
17.65	-61.9507						17.65	-64.0259					17.65	-65.6128
17.7	-63.7817						17.7	-63.7817					17.7	-63.1714
17.75	-62.2559						17.75	-63.9038					17.75	-64.3921
17.8	-63.7817						17.8	-64.1174					17.8	-66.5283
17.85	-64.0869						17.85	-64.1785					17.85	-64.3921
17.9	-62.2559						17.9	-64.209					17.9	-62.8662
17.95	-64.0869						17.95	-64.0869					17.95	-65.6128
18	-62.561						18	-64.1785					18	-64.6973
18.05	-65.3076						18.05	-64.1174					18.05	-63.4766
18.1	-62.2559						18.1	-63.9648					18.1	-65.0024
18.15	-63.7817						18.15	-63.8428					18.15	-64.0869
18.2	-61.9507						18.2	-63.8733					18.2	-64.3921
18.25	-63.7817						18.25	-63.9954					18.25	-65.918
18.3	-61.9507						18.3	-64.1479					18.3	-62.2559
18.35	-63.1714						18.35	-64.2395					18.35	-65.6128
18.4	-63.7817						18.4	-64.2395					18.4	-63.7817
18.45	-62.561						18.45	-64.1785					18.45	-64.6973
18.5	-65.3076						18.5	-64.1785					18.5	-64.6973
18.55	-61.0352						18.55	-64.0259					18.55	-65.0024
18.6	-64.3921						18.6	-64.0564					18.6	-65.3076
18.65	-61.3403						18.65	-63.7817					18.65	-63.7817
18.7	-64.0869						18.7	-63.9038					18.7	-65.0024
18.75	-63.4766						18.75	-64.0259					18.75	-64.3921
18.8	-62.561						18.8	-64.209					18.8	-65.6128
18.85	-64.6973						18.85	-64.1479					18.85	-63.7817
18.9	-61.9507						18.9	-64.0869					18.9	-65.3076
18.95	-65.0024						18.95	-63.7817					18.95	-64.0869
19	-60.73						19	-64.0869					19	-65.6128
19.05	-63.7817						19.05	-64.1785					19.05	-65.0024
19.1	-62.561						19.1	-64.1479					19.1	-63.4766
19.15	-62.2559						19.15	-63.7817					19.15	-65.6128
19.2	-63.7817						19.2	-64.1174					19.2	-63.1714
19.25	-62.8662						19.25	-64.209					19.25	-64.6973
19.3	-64.6973						19.3	-63.9648					19.3	-62.2559
19.35	-61.0352						19.35	-64.0564					19.35	-66.2231
19.4	-62.8662						19.4	-64.1479					19.4	-63.1714
19.45	-64.6973						19.45	-64.0869					19.45	-65.918
19.5	-62.2559						19.5	-64.1174					19.5	-63.7817
19.55	-64.0869						19.55	-64.209					19.55	-65.918
19.6	-61.3403						19.6	-63.8428					19.6	-64.3921
19.65	-64.6973						19.65	-64.2395					19.65	-65.0024
19.7	-61.6455						19.7	-64.3005					19.7	-64.3921
19.75	-63.7817						19.75	-63.8733					19.75	-64.6973
19.8	-63.1714						19.8	-64.2395					19.8	-64.6973
19.85	-62.561						19.85	-64.27					19.85	-62.8662
19.9	-65.0024						19.9	-63.9954					19.9	-65.3076
19.95	-61.6455						19.95	-64.3005					19.95	-63.4766
20	-63.1714						20	-63.9954					20	-65.6128
20.05	-63.7817						20.05	-64.1785					20.05	-63.1714
20.1	-63.4766						20.1	-64.3005					20.1	-64.3921
20.15	-65.0024						20.15	-63.8123					20.15	-63.1714
20.2	-61.9507						20.2	-64.2395					20.2	-65.0024
20.25	-63.7817						20.25	-64.3005					20.25	-63.4766
20.3	-64.0869						20.3	-63.8733					20.3	-65.0024
20.35	-61.9507						20.35	-64.27					20.35	-64.0869
20.4	-64.0869						20.4	-64.2395					20.4	-65.0024
20.45	-61.6455						20.45	-63.8733					20.45	-65.3076
20.5	-64.3921						20.5	-64.3005					20.5	-63.7817
20.55	-64.0869						20.55	-64.1479					20.55	-65.0024
20.6	-62.561						20.6	-63.9343					20.6	-64.6973
20.65	-64.6973						20.65	-64.209					20.65	-66.5283
20.7	-62.561						20.7	-64.209					20.7	-63.7817
20.75	-63.4766						20.75	-63.8733					20.75	-65.6128
20.8	-64.3921						20.8	-64.0259					20.8	-63.7817
20.85	-61.6455						20.85	-64.209					20.85	-65.6128
20.9	-63.7817						20.9	-64.1479					20.9	-62.561
20.95	-61.6455						20.95	-63.7817					20.95	-64.3921
21	-62.2559						21	-64.1785					21	-65.0024
21.05	-65.0024						21.05	-64.209					21.05	-65.0024
21.1	-61.9507						21.1	-63.9038					21.1	-65.0024
21.15	-63.7817						21.15	-63.8733					21.15	-64.0869
21.2	-63.4766						21.2	-64.1479					21.2	-66.2231
21.25	-62.2559						21.25	-64.0869					21.25	-63.1714
21.3	-63.7817						21.3	-63.7512					21.3	-66.5283
21.35	-62.8662						21.35	-64.0564					21.35	-61.9507
21.4	-62.2559						21.4	-63.9343					21.4	-66.2231
21.45	-64.6973						21.45	-63.8428					21.45	-63.4766
21.5	-61.9507						21.5	-63.7512					21.5	-65.6128
21.55	-62.8662						21.55	-64.0259					21.55	-65.3076
21.6	-64.3921						21.6	-63.9954					21.6	-65.6128
21.65	-61.3403						21.65	-63.7817					21.65	-66.8335
21.7	-63.4766						21.7	-63.7817					21.7	-64.0869
21.75	-63.7817						21.75	-64.0564					21.75	-66.5283
21.8	-61.0352						21.8	-63.9038					21.8	-63.4766
21.85	-63.1714						21.85	-63.6902					21.85	-66.2231
21.9	-63.1714						21.9	-63.7207					21.9	-63.7817
21.95	-61.6455						21.95	-63.9954					21.95	-65.0024
22	-64.0869						22	-63.7817					22	-65.918
22.05	-62.8662						22.05	-63.6597					22.05	-63.7817
22.1	-61.3403						22.1	-63.6597					22.1	-65.918
22.15	-63.7817						22.15	-63.9038					22.15	-63.4766
22.2	-61.0352						22.2	-63.8123					22.2	-66.2231
22.25	-63.1714						22.25	-63.6291					22.25	-64.6973
22.3	-63.7817						22.3	-63.5986					22.3	-64.6973
22.35	-61.6455						22.35	-63.9648					22.35	-66.8335
22.4	-61.9507						22.4	-63.8123					22.4	-65.0024
22.45	-64.6973						22.45	-63.5986					22.45	-67.1387
22.5	-61.0352						22.5	-63.5071					22.5	-62.8662
22.55	-62.8662						22.55	-63.7817					22.55	-65.6128
22.6	-64.0869						22.6	-63.7207					22.6	-65.0024
22.65	-61.6455						22.65	-63.6291					22.65	-64.0869
22.7	-62.561						22.7	-63.446					22.7	-65.918
22.75	-65.0024						22.75	-63.7512					22.75	-63.4766
22.8	-61.6455						22.8	-63.7512					22.8	-66.2231
22.85	-62.2559						22.85	-63.6902					22.85	-63.7817
22.9	-64.0869						22.9	-63.5376					22.9	-65.3076
22.95	-61.9507						22.95	-63.5071					22.95	-65.6128
23	-62.2559						23	-63.6902					23	-64.3921
23.05	-63.1714						23.05	-63.5681					23.05	-65.918
23.1	-64.0869						23.1	-63.5986					23.1	-63.4766
23.15	-61.9507						23.15	-63.324					23.15	-65.3076
23.2	-63.7817						23.2	-63.5071					23.2	-66.2231
23.25	-62.8662						23.25	-63.6597					23.25	-64.3921
23.3	-62.561						23.3	-63.6902					23.3	-66.2231
23.35	-63.4766						23.35	-63.4766					23.35	-63.4766
23.4	-63.4766						23.4	-63.324					23.4	-65.918
23.45	-60.4248						23.45	-63.5681					23.45	-65.918
23.5	-63.7817						23.5	-63.7512					23.5	-64.0869
23.55	-64.3921						23.55	-63.6597					23.55	-65.918
23.6	-61.6455						23.6	-63.446					23.6	-64.0869
23.65	-62.2559						23.65	-63.2019					23.65	-64.6973
23.7	-62.8662						23.7	-63.5681					23.7	-65.6128
23.75	-62.561						23.75	-63.6597					23.75	-63.4766
23.8	-63.7817						23.8	-63.5681					23.8	-66.2231
23.85	-61.0352						23.85	-63.4155					23.85	-64.0869
23.9	-64.3921						23.9	-63.2019					23.9	-64.3921
23.95	-62.2559						23.95	-63.4766					23.95	-65.918
24	-63.4766						24	-63.5376					24	-63.1714
24.05	-62.2559						24.05	-63.5986					24.05	-65.6128
24.1	-63.4766						24.1	-63.5071					24.1	-66.2231
24.15	-61.6455						24.15	-63.2935					24.15	-63.4766
24.2	-62.2559						24.2	-63.2629					24.2	-65.6128
24.25	-61.3403						24.25	-63.5681					24.25	-64.3921
24.3	-63.7817						24.3	-63.6291					24.3	-65.6128
24.35	-62.8662						24.35	-63.5071					24.35	-65.6128
24.4	-63.1714						24.4	-63.3545					24.4	-63.4766
24.45	-61.9507						24.45	-63.2019					24.45	-65.6128
24.5	-63.1714						24.5	-63.324					24.5	-65.918
24.55	-61.3403						24.55	-63.5681					24.55	-63.1714
24.6	-63.1714						24.6	-63.5071					24.6	-65.3076
24.65	-61.9507						24.65	-63.446					24.65	-65.918
24.7	-63.7817						24.7	-63.4155					24.7	-63.7817
24.75	-61.6455						24.75	-63.2019					24.75	-66.2231
24.8	-64.3921						24.8	-63.324					24.8	-63.7817
24.85	-61.6455						24.85	-63.4766					24.85	-65.3076
24.9	-64.0869						24.9	-63.6291					24.9	-66.8335
24.95	-62.561						24.95	-63.5071					24.95	-63.4766
25	-63.4766						25	-63.4155					25	-64.6973
25.05	-62.2559						25.05	-63.2324					25.05	-66.8335
25.1	-63.1714						25.1	-63.1409					25.1	-63.1714
25.15	-63.1714						25.15	-63.385					25.15	-65.6128
25.2	-61.0352						25.2	-63.5681					25.2	-65.918
25.25	-63.7817						25.25	-63.4766					25.25	-62.8662
25.3	-61.9507						25.3	-63.5071					25.3	-65.3076
25.35	-63.4766						25.35	-63.3545					25.35	-66.2231
25.4	-61.0352						25.4	-63.2629					25.4	-63.1714
25.45	-63.7817						25.45	-63.1409					25.45	-65.918
25.5	-61.6455						25.5	-63.3545					25.5	-66.8335
25.55	-63.4766						25.55	-63.4766					25.55	-63.1714
25.6	-61.6455						25.6	-63.5681					25.6	-65.6128
25.65	-63.4766						25.65	-63.446					25.65	-66.8335
25.7	-61.3403						25.7	-63.385					25.7	-64.0869
25.75	-62.8662						25.75	-63.2629					25.75	-65.3076
25.8	-61.3403						25.8	-63.1714					25.8	-66.5283
25.85	-62.8662						25.85	-63.1103					25.85	-63.7817
25.9	-62.8662						25.9	-63.324					25.9	-65.918
25.95	-63.1714						25.95	-63.446					25.95	-65.6128
26	-62.8662						26	-63.5376					26	-64.0869
26.05	-61.6455						26.05	-63.3545					26.05	-65.6128
26.1	-64.3921						26.1	-63.4155					26.1	-67.4438
26.15	-61.6455						26.15	-63.2629					26.15	-64.0869
26.2	-65.0024						26.2	-63.2019					26.2	-65.3076
26.25	-61.0352						26.25	-63.1103					26.25	-66.8335
26.3	-63.4766						26.3	-63.1714					26.3	-64.3921
26.35	-61.0352						26.35	-63.4155					26.35	-64.3921
26.4	-63.1714						26.4	-63.446					26.4	-66.5283
26.45	-61.9507						26.45	-63.446					26.45	-64.0869
26.5	-63.1714						26.5	-63.324					26.5	-65.6128
26.55	-63.7817						26.55	-63.385					26.55	-66.5283
26.6	-62.561						26.6	-63.385					26.6	-64.3921
26.65	-64.0869						26.65	-63.2019					26.65	-66.5283
26.7	-60.4248						26.7	-63.0798					26.7	-65.0024
26.75	-64.6973						26.75	-63.0188					26.75	-65.0024
26.8	-61.3403						26.8	-63.1714					26.8	-66.8335
26.85	-63.1714						26.85	-63.324					26.85	-64.6973
26.9	-60.73						26.9	-63.385					26.9	-66.5283
26.95	-63.1714						26.95	-63.385					26.95	-64.3921
27	-63.7817						27	-63.324					27	-66.5283
27.05	-61.9507						27.05	-63.2324					27.05	-64.0869
27.1	-63.7817						27.1	-63.0188					27.1	-66.5283
27.15	-61.6455						27.15	-63.1103					27.15	-64.0869
27.2	-63.7817						27.2	-63.385					27.2	-66.2231
27.25	-62.2559						27.25	-63.324					27.25	-64.0869
27.3	-63.4766						27.3	-63.2935					27.3	-66.5283
27.35	-64.0869						27.35	-63.0798					27.35	-64.0869
27.4	-63.1714						27.4	-63.2324					27.4	-65.6128
27.45	-65.3076						27.45	-63.3545					27.45	-65.0024
27.5	-61.0352						27.5	-63.2019					27.5	-65.918
27.55	-64.3921						27.55	-63.0188					27.55	-65.0024
27.6	-61.9507						27.6	-63.385					27.6	-64.0869
27.65	-62.8662						27.65	-63.2935					27.65	-64.6973
27.7	-63.4766						27.7	-62.9272					27.7	-63.7817
27.75	-62.8662						27.75	-63.3545					27.75	-65.918
27.8	-64.3921						27.8	-63.2629					27.8	-63.1714
27.85	-61.9507						27.85	-62.8052					27.85	-65.918
27.9	-63.7817						27.9	-63.4155					27.9	-64.3921
27.95	-61.9507						27.95	-63.2324					27.95	-66.2231
28	-63.4766						28	-62.9883					28	-64.3921
28.05	-63.4766						28.05	-63.324					28.05	-65.6128
28.1	-62.2559						28.1	-63.2324					28.1	-65.0024
28.15	-64.3921						28.15	-63.2019					28.15	-65.918
28.2	-61.9507						28.2	-63.385					28.2	-64.6973
28.25	-63.4766						28.25	-62.8967					28.25	-65.3076
28.3	-63.4766						28.3	-63.324					28.3	-65.0024
28.35	-62.2559						28.35	-63.324					28.35	-65.918
28.4	-65.0024						28.4	-62.9883					28.4	-65.6128
28.45	-61.0352						28.45	-63.324					28.45	-65.3076
28.5	-63.7817						28.5	-63.2629					28.5	-66.2231
28.55	-63.1714						28.55	-62.9272					28.55	-65.918
28.6	-63.4766						28.6	-63.3545					28.6	-65.0024
28.65	-64.3921						28.65	-63.1714					28.65	-65.6128
28.7	-61.6455						28.7	-62.9883					28.7	-65.3076
28.75	-64.0869						28.75	-63.324					28.75	-67.4438
28.8	-63.1714						28.8	-63.2629					28.8	-64.3921
28.85	-62.561						28.85	-62.9883					28.85	-66.5283
28.9	-65.0024						28.9	-63.3545					28.9	-64.6973
28.95	-61.6455						28.95	-63.2324					28.95	-67.1387
29	-63.7817						29	-62.8967					29	-64.3921
29.05	-64.0869						29.05	-63.324					29.05	-65.918
29.1	-61.9507						29.1	-63.1714					29.1	-64.3921
29.15	-65.0024						29.15	-63.0493					29.15	-66.8335
29.2	-61.6455						29.2	-63.1409					29.2	-64.3921
29.25	-62.561						29.25	-63.324					29.25	-65.6128
29.3	-64.3921						29.3	-63.1714					29.3	-65.918
29.35	-61.6455						29.35	-62.9883					29.35	-65.3076
29.4	-64.0869						29.4	-63.2935					29.4	-66.2231
29.45	-63.7817						29.45	-63.2629					29.45	-63.7817
29.5	-62.2559						29.5	-62.8967					29.5	-67.1387
29.55	-65.0024						29.55	-63.2019					29.55	-64.0869
29.6	-60.73						29.6	-63.324					29.6	-65.3076
29.65	-63.4766						29.65	-63.1714					29.65	-65.3076
29.7	-64.0869						29.7	-62.9272					29.7	-65.6128
29.75	-62.2559						29.75	-63.2935					29.75	-65.6128
29.8	-63.7817						29.8	-63.3545					29.8	-64.0869
29.85	-63.4766						29.85	-63.1103					29.85	-66.2231
29.9	-61.3403						29.9	-63.1103					29.9	-63.4766
29.95	-64.0869						29.95	-63.385					29.95	-66.2231
30	-61.3403						30	-63.385					30	-63.1714
30.05	-62.2559						30.05	-63.0798					30.05	-65.3076
30.1	-64.0869						30.1	-63.1103					30.1	-64.6973
30.15	-61.0352						30.15	-63.2935					30.15	-65.0024
30.2	-63.1714						30.2	-63.3545					30.2	-66.2231
30.25	-64.3921						30.25	-63.0493					30.25	-63.4766
30.3	-60.4248						30.3	-63.2324					30.3	-66.8335
30.35	-63.1714						30.35	-63.2324					30.35	-62.561
30.4	-63.7817						30.4	-63.324					30.4	-65.6128
30.45	-61.6455						30.45	-63.0188					30.45	-64.0869
30.5	-62.8662						30.5	-63.1103					30.5	-65.0024
30.55	-62.561						30.55	-63.3545					30.55	-65.918
30.6	-61.9507						30.6	-63.385					30.6	-63.4766
30.65	-63.4766						30.65	-63.1103					30.65	-66.2231
30.7	-64.3921						30.7	-63.0493					30.7	-62.8662
30.75	-61.9507						30.75	-63.385					30.75	-65.6128
30.8	-64.6973						30.8	-63.3545					30.8	-64.3921
30.85	-64.0869						30.85	-63.1103					30.85	-64.3921
30.9	-61.3403						30.9	-62.9883					30.9	-65.6128
30.95	-63.7817						30.95	-63.2935					30.95	-64.0869
31	-64.0869						31	-63.385					31	-66.2231
31.05	-61.9507						31.05	-63.2324					31.05	-63.7817
31.1	-63.7817						31.1	-62.9272					31.1	-64.6973
31.15	-63.4766						31.15	-63.1409					31.15	-65.918
31.2	-62.561						31.2	-63.3545					31.2	-63.7817
31.25	-63.7817						31.25	-63.2935					31.25	-65.6128
31.3	-63.7817						31.3	-63.0188					31.3	-62.8662
31.35	-61.0352						31.35	-63.0188					31.35	-66.2231
31.4	-64.0869						31.4	-63.2629					31.4	-65.3076
31.45	-64.3921						31.45	-63.2629					31.45	-64.3921
31.5	-61.3403						31.5	-63.1409					31.5	-65.0024
31.55	-63.1714						31.55	-62.8967					31.55	-64.3921
31.6	-65.0024						31.6	-63.0188					31.6	-65.3076
31.65	-62.2559						31.65	-63.2629					31.65	-65.6128
31.7	-63.1714						31.7	-63.1714					31.7	-64.0869
31.75	-64.0869						31.75	-63.0493					31.75	-67.1387
31.8	-62.8662						31.8	-62.8967					31.8	-63.1714
31.85	-63.7817						31.85	-63.0798					31.85	-65.3076
31.9	-64.6973						31.9	-63.1714					31.9	-65.0024
31.95	-62.2559						31.95	-63.1103					31.95	-64.0869
32	-63.4766						32	-62.9578					32	-66.5283
32.05	-65.0024						32.05	-62.7136					32.05	-64.0869
32.1	-62.2559						32.1	-62.9272					32.1	-64.0869
32.15	-64.6973						32.15	-63.1409					32.15	-66.5283
32.2	-62.2559						32.2	-62.9883					32.2	-63.4766
32.25	-64.0869						32.25	-62.8967					32.25	-65.918
32.3	-61.9507						32.3	-62.6831					32.3	-65.6128
32.35	-64.3921						32.35	-62.8662					32.35	-64.3921
32.4	-64.0869						32.4	-63.1103					32.4	-67.4438
32.45	-63.7817						32.45	-63.0493					32.45	-63.7817
32.5	-64.3921						32.5	-62.9883					32.5	-65.6128
32.55	-62.8662						32.55	-62.8357					32.55	-66.5283
32.6	-64.6973						32.6	-62.6526					32.6	-64.0869
32.65	-63.4766						32.65	-62.9578					32.65	-65.3076
32.7	-64.3921						32.7	-63.0493					32.7	-64.0869
32.75	-62.8662						32.75	-62.9578					32.75	-64.3921
32.8	-64.0869						32.8	-62.8357					32.8	-67.1387
32.85	-63.7817						32.85	-62.6831					32.85	-63.4766
32.9	-62.561						32.9	-62.7136					32.9	-65.0024
32.95	-63.4766						32.95	-62.9578					32.95	-66.8335
33	-63.1714						33	-63.0493					33	-63.1714
33.05	-64.0869						33.05	-63.0188					33.05	-65.3076
33.1	-62.2559						33.1	-62.9272					33.1	-65.918
33.15	-64.6973						33.15	-62.7136					33.15	-63.4766
33.2	-62.561						33.2	-62.6526					33.2	-65.6128
33.25	-64.6973						33.25	-63.0188					33.25	-65.918
33.3	-61.9507						33.3	-63.0798					33.3	-63.7817
33.35	-65.3076						33.35	-63.0188					33.35	-65.918
33.4	-62.561						33.4	-62.8967					33.4	-65.6128
33.45	-64.0869						33.45	-62.9272					33.45	-63.7817
33.5	-63.1714						33.5	-62.6526					33.5	-66.2231
33.55	-62.8662						33.55	-62.7441					33.55	-65.0024
33.6	-63.7817						33.6	-62.9883					33.6	-64.0869
33.65	-62.8662						33.65	-63.1409					33.65	-66.5283
33.7	-63.7817						33.7	-63.0493					33.7	-63.7817
33.75	-61.6455						33.75	-62.9883					33.75	-63.7817
33.8	-64.0869						33.8	-62.8357					33.8	-65.918
33.85	-62.2559						33.85	-62.8052					33.85	-64.3921
33.9	-63.7817						33.9	-62.8357					33.9	-63.4766
33.95	-61.3403						33.95	-63.0188					33.95	-66.5283
34	-63.7817						34	-63.1409					34	-64.3921
34.05	-62.8662						34.05	-63.1103					34.05	-64.0869
34.1	-64.3921						34.1	-63.1409					34.1	-65.6128
34.15	-62.8662						34.15	-62.9883					34.15	-64.3921
34.2	-62.8662						34.2	-62.8357					34.2	-63.4766
34.25	-64.6973						34.25	-62.7136					34.25	-65.6128
34.3	-63.4766						34.3	-62.8662					34.3	-64.6973
34.35	-64.0869						34.35	-62.9578					34.35	-61.9507
34.4	-62.2559						34.4	-63.1409					34.4	-65.918
34.45	-65.0024						34.45	-63.1714					34.45	-65.3076
34.5	-61.9507						34.5	-63.1103					34.5	-63.1714
34.55	-64.6973						34.55	-63.0188					34.55	-63.7817
34.6	-61.0352						34.6	-62.9883					34.6	-66.2231
34.65	-64.3921						34.65	-62.8052					34.65	-63.1714
34.7	-62.561						34.7	-62.8967					34.7	-65.0024
34.75	-63.7817						34.75	-62.8052					34.75	-65.6128
34.8	-63.1714						34.8	-63.1103					34.8	-63.7817
34.85	-63.7817						34.85	-63.2019					34.85	-65.0024
34.9	-64.0869						34.9	-63.2629					34.9	-63.4766
34.95	-62.2559						34.95	-63.1409					34.95	-63.7817
35	-64.6973						35	-63.1103					35	-65.918
35.05	-61.6455						35.05	-63.1409					35.05	-62.8662
35.1	-65.0024						35.1	-63.0188					35.1	-65.6128
35.15	-61.9507						35.15	-62.8357					35.15	-61.9507
35.2	-63.4766						35.2	-62.8662					35.2	-65.0024
35.25	-63.7817						35.25	-63.0188					35.25	-64.0869
35.3	-62.8662						35.3	-63.2019					35.3	-64.6973
35.35	-64.3921						35.35	-63.1714					35.35	-63.4766
35.4	-61.9507						35.4	-63.1409					35.4	-65.6128
35.45	-64.6973						35.45	-63.2019					35.45	-64.0869
35.5	-62.561						35.5	-62.9883					35.5	-65.0024
35.55	-64.0869						35.55	-63.0188					35.55	-65.0024
35.6	-62.2559						35.6	-63.2629					35.6	-65.6128
35.65	-63.1714						35.65	-63.2935					35.65	-64.0869
35.7	-64.3921						35.7	-63.1103					35.7	-65.6128
35.75	-62.2559						35.75	-62.9883					35.75	-63.1714
35.8	-65.3076						35.8	-63.2935					35.8	-66.2231
35.85	-61.6455						35.85	-63.2935					35.85	-63.4766
35.9	-65.0024						35.9	-63.0798					35.9	-66.2231
35.95	-61.9507						35.95	-63.2324					35.95	-63.4766
36	-63.4766						36	-63.2324					36	-66.2231
36.05	-63.7817						36.05	-63.0798					36.05	-64.6973
36.1	-62.8662						36.1	-63.1714					36.1	-65.3076
36.15	-64.0869						36.15	-63.385					36.15	-65.3076
36.2	-61.9507						36.2	-63.1409					36.2	-65.0024
36.25	-64.0869						36.25	-63.2629					36.25	-65.6128
36.3	-62.8662						36.3	-63.324					36.3	-63.1714
36.35	-62.561						36.35	-62.9883					36.35	-65.6128
36.4	-64.3921						36.4	-63.3545					36.4	-62.8662
36.45	-62.2559						36.45	-63.385					36.45	-66.2231
36.5	-65.3076						36.5	-63.0798					36.5	-62.8662
36.55	-61.6455						36.55	-63.4155					36.55	-65.6128
36.6	-63.7817						36.6	-63.324					36.6	-63.7817
36.65	-64.0869						36.65	-63.1714					36.65	-66.5283
36.7	-62.2559						36.7	-63.5071					36.7	-62.561
36.75	-64.0869						36.75	-63.1714					36.75	-66.2231
36.8	-61.0352						36.8	-63.446					36.8	-63.4766
36.85	-65.0024						36.85	-63.3545					36.85	-65.6128
36.9	-62.8662						36.9	-63.1103					36.9	-63.1714
36.95	-62.8662						36.95	-63.4766					36.95	-65.918
37	-64.6973						37	-63.4155					37	-64.0869
37.05	-61.9507						37.05	-63.0188					37.05	-65.6128
37.1	-64.3921						37.1	-63.5071					37.1	-63.1714
37.15	-63.7817						37.15	-63.446					37.15	-64.6973
37.2	-62.8662						37.2	-63.2019					37.2	-64.0869
37.25	-65.3076						37.25	-63.4766					37.25	-64.3921
37.3	-61.3403						37.3	-63.5376					37.3	-65.0024
37.35	-64.0869						37.35	-63.2324					37.35	-64.3921
37.4	-63.7817						37.4	-63.385					37.4	-66.5283
37.45	-62.2559						37.45	-63.5376					37.45	-63.1714
37.5	-65.0024						37.5	-63.3545					37.5	-66.5283
37.55	-62.2559						37.55	-63.3545					37.55	-63.1714
37.6	-63.4766						37.6	-63.5681					37.6	-65.6128
37.65	-64.0869						37.65	-63.385					37.65	-62.561
37.7	-62.2559						37.7	-63.1409					37.7	-65.0024
37.75	-63.7817						37.75	-63.5071					37.75	-63.7817
37.8	-61.9507						37.8	-63.446					37.8	-64.3921
37.85	-61.9507						37.85	-63.2935					37.85	-65.0024
37.9	-65.918						37.9	-63.2935					37.9	-63.7817
37.95	-61.6455						37.95	-63.5681					37.95	-65.6128
38	-63.7817						38	-63.385					38	-62.8662
38.05	-63.4766						38.05	-63.1409					38.05	-65.918
38.1	-62.8662						38.1	-63.385					38.1	-63.4766
38.15	-63.7817						38.15	-63.5376					38.15	-65.0024
38.2	-63.7817						38.2	-63.3545					38.2	-63.4766
38.25	-61.9507						38.25	-63.1409					38.25	-65.3076
38.3	-65.6128						38.3	-63.5071					38.3	-66.2231
38.35	-62.2559						38.35	-63.5071					38.35	-63.7817
38.4	-63.1714						38.4	-63.1714					38.4	-65.0024
38.45	-64.6973						38.45	-63.1103					38.45	-63.7817
38.5	-62.561						38.5	-63.446					38.5	-65.6128
38.55	-63.4766						38.55	-63.446					38.55	-62.561
38.6	-63.7817						38.6	-63.1714					38.6	-64.0869
38.65	-60.73						38.65	-63.1409					38.65	-65.918
38.7	-64.6973						38.7	-63.4766					38.7	-64.0869
38.75	-64.0869						38.75	-63.4766					38.75	-65.918
38.8	-61.9507						38.8	-63.2324					38.8	-63.1714
38.85	-64.0869						38.85	-63.0798					38.85	-66.2231
38.9	-63.4766						38.9	-63.4766					38.9	-63.4766
38.95	-62.561						38.95	-63.4155					38.95	-65.3076
39	-64.0869						39	-63.1714					39	-63.7817
39.05	-63.1714						39.05	-63.0798					39.05	-64.6973
39.1	-62.561						39.1	-63.4155					39.1	-65.918
39.15	-65.0024						39.15	-63.3545					39.15	-62.8662
39.2	-62.561						39.2	-63.2324					39.2	-65.6128
39.25	-62.8662						39.25	-63.0188					39.25	-63.4766
39.3	-64.6973						39.3	-63.3545					39.3	-65.3076
39.35	-62.8662						39.35	-63.4155					39.35	-64.6973
39.4	-61.9507						39.4	-63.3545					39.4	-63.1714
39.45	-64.6973						39.45	-63.0188					39.45	-65.918
39.5	-63.1714						39.5	-63.2629					39.5	-62.561
39.55	-62.2559						39.55	-63.4155					39.55	-64.6973
39.6	-64.0869						39.6	-63.4766					39.6	-64.6973
39.65	-63.7817						39.65	-63.2019					39.65	-64.0869
39.7	-61.9507						39.7	-63.0493					39.7	-66.8335
39.75	-63.7817						39.75	-63.385					39.75	-62.2559
39.8	-63.1714						39.8	-63.446					39.8	-65.6128
39.85	-61.9507						39.85	-63.3545					39.85	-65.0024
39.9	-63.7817						39.9	-63.0798					39.9	-64.0869
39.95	-64.0869						39.95	-63.2019					39.95	-65.6128
40	-61.3403						40	-63.4155					40	-63.1714
40.05	-63.1714						40.05	-63.385					40.05	-65.3076
40.1	-64.6973						40.1	-63.2324					40.1	-64.6973
40.15	-62.2559						40.15	-63.0188					40.15	-63.7817
40.2	-63.7817						40.2	-63.2935					40.2	-65.918
40.25	-64.0869						40.25	-63.5376					40.25	-63.7817
40.3	-62.561						40.3	-63.2935					40.3	-65.0024
40.35	-63.7817						40.35	-63.2935					40.35	-65.3076
40.4	-62.561						40.4	-63.1409					40.4	-62.8662
40.45	-62.8662						40.45	-63.2935					40.45	-65.6128
40.5	-64.3921						40.5	-63.385					40.5	-63.4766
40.55	-61.3403						40.55	-63.5071					40.55	-64.6973
40.6	-64.0869						40.6	-63.3545					40.6	-65.0024
40.65	-61.9507						40.65	-63.1714					40.65	-62.8662
40.7	-64.0869						40.7	-63.1714					40.7	-65.3076
40.75	-62.561						40.75	-63.5376					40.75	-64.6973
40.8	-64.3921						40.8	-63.5681					40.8	-62.2559
40.85	-62.2559						40.85	-63.5071					40.85	-66.2231
40.9	-63.7817						40.9	-63.2629					40.9	-62.8662
40.95	-62.561						40.95	-63.2629					40.95	-64.6973
41	-63.4766						41	-63.5071					41	-65.3076
41.05	-61.9507						41.05	-63.6291					41.05	-63.1714
41.1	-63.7817						41.1	-63.5376					41.1	-65.3076
41.15	-61.9507						41.15	-63.5376					41.15	-65.0024
41.2	-63.7817						41.2	-63.2324					41.2	-63.1714
41.25	-61.3403						41.25	-63.2324					41.25	-64.6973
41.3	-64.0869						41.3	-63.5071					41.3	-63.7817
41.35	-61.6455						41.35	-63.6902					41.35	-63.4766
41.4	-65.0024						41.4	-63.5986					41.4	-65.6128
41.45	-61.6455						41.45	-63.4766					41.45	-62.8662
41.5	-64.0869						41.5	-63.2629					41.5	-64.3921
41.55	-63.4766						41.55	-63.324					41.55	-66.2231
41.6	-64.0869						41.6	-63.5376					41.6	-62.8662
41.65	-62.561						41.65	-63.6291					41.65	-64.0869
41.7	-62.561						41.7	-63.5376					41.7	-66.2231
41.75	-63.1714						41.75	-63.5681					41.75	-62.8662
41.8	-61.6455						41.8	-63.385					41.8	-65.0024
41.85	-63.4766						41.85	-63.1714					41.85	-65.0024
41.9	-60.4248						41.9	-63.2935					41.9	-63.1714
41.95	-64.3921						41.95	-63.5681					41.95	-65.0024
42	-61.6455						42	-63.6597					42	-65.6128
42.05	-64.6973						42.05	-63.5376					42.05	-62.561
42.1	-60.73						42.1	-63.4155					42.1	-66.2231
42.15	-64.3921						42.15	-63.4155					42.15	-66.2231
42.2	-62.2559						42.2	-63.2019					42.2	-63.1714
42.25	-63.7817						42.25	-63.2019					42.25	-64.6973
42.3	-61.0352						42.3	-63.5681					42.3	-65.3076
42.35	-65.3076						42.35	-63.6291					42.35	-64.0869
42.4	-61.6455						42.4	-63.5071					42.4	-65.0024
42.45	-63.4766						42.45	-63.5681					42.45	-65.6128
42.5	-61.3403						42.5	-63.385					42.5	-63.7817
42.55	-64.0869						42.55	-63.2629					42.55	-66.2231
42.6	-61.9507						42.6	-63.2324					42.6	-66.2231
42.65	-62.8662						42.65	-63.3545					42.65	-63.4766
42.7	-62.8662						42.7	-63.5071					42.7	-65.3076
42.75	-62.561						42.75	-63.6291					42.75	-66.8335
42.8	-63.7817						42.8	-63.5986					42.8	-63.1714
42.85	-62.2559						42.85	-63.5681					42.85	-65.0024
42.9	-64.0869						42.9	-63.4155					42.9	-66.8335
42.95	-61.9507						42.95	-63.3545					42.95	-63.7817
43	-65.0024						43	-63.1714					43	-64.6973
43.05	-61.3403						43.05	-63.2935					43.05	-66.5283
43.1	-63.7817						43.1	-63.385					43.1	-62.8662
43.15	-61.6455						43.15	-63.5376					43.15	-65.0024
43.2	-64.0869						43.2	-63.6291					43.2	-65.0024
43.25	-62.561						43.25	-63.5071					43.25	-62.8662
43.3	-62.8662						43.3	-63.4155					43.3	-65.918
43.35	-63.7817						43.35	-63.446					43.35	-64.0869
43.4	-62.8662						43.4	-63.4155					43.4	-64.6973
43.45	-64.0869						43.45	-63.385					43.45	-65.6128
43.5	-61.6455						43.5	-63.2324					43.5	-64.0869
43.55	-63.4766						43.55	-63.2935					43.55	-66.5283
43.6	-61.0352						43.6	-63.5376					43.6	-63.1714
43.65	-63.1714						43.65	-63.6597					43.65	-65.918
43.7	-62.8662						43.7	-63.5681					43.7	-63.1714
43.75	-62.8662						43.75	-63.5376					43.75	-66.5283
43.8	-64.0869						43.8	-63.4766					43.8	-63.4766
43.85	-60.73						43.85	-63.2629					43.85	-65.6128
43.9	-64.3921						43.9	-63.446					43.9	-63.7817
43.95	-61.6455						43.95	-63.5681					43.95	-65.918
44	-63.4766						44	-63.6291					44	-64.0869
44.05	-62.2559						44.05	-63.3545					44.05	-65.6128
44.1	-62.8662						44.1	-63.5071					44.1	-64.3921
44.15	-63.7817						44.15	-63.6597					44.15	-65.6128
44.2	-62.2559						44.2	-63.5986					44.2	-64.3921
44.25	-64.0869						44.25	-63.2629					44.25	-64.3921
44.3	-61.0352						44.3	-63.6902					44.3	-64.6973
44.35	-63.7817						44.35	-63.5986					44.35	-65.0024
44.4	-61.6455						44.4	-63.2324					44.4	-65.3076
44.45	-62.561						44.45	-63.6902					44.45	-63.1714
44.5	-63.1714						44.5	-63.6291					44.5	-64.3921
44.55	-61.6455						44.55	-63.324					44.55	-62.8662
44.6	-63.7817						44.6	-63.6902					44.6	-65.6128
44.65	-61.0352						44.65	-63.5986					44.65	-62.2559
44.7	-62.8662						44.7	-63.324					44.7	-65.3076
44.75	-62.2559						44.75	-63.6291					44.75	-63.1714
44.8	-61.9507						44.8	-63.446					44.8	-65.6128
44.85	-64.0869						44.85	-63.5986					44.85	-63.1714
44.9	-60.4248						44.9	-63.5681					44.9	-64.6973
44.95	-62.561						44.95	-63.2935					44.95	-63.4766
45	-61.3403						45	-63.6597					45	-65.0024
45.05	-62.561						45.05	-63.5681					45.05	-63.4766
45.1	-63.1714						45.1	-63.2324					45.1	-65.0024
45.15	-60.4248						45.15	-63.7207					45.15	-64.3921
45.2	-64.3921						45.2	-63.4766					45.2	-65.0024
45.25	-61.3403						45.25	-63.4766					45.25	-63.7817
45.3	-62.8662						45.3	-63.5986					45.3	-65.0024
45.35	-62.8662						45.35	-63.4155					45.35	-63.7817
45.4	-61.9507						45.4	-63.446					45.4	-65.918
45.45	-63.7817						45.45	-63.6597					45.45	-62.8662
45.5	-61.9507						45.5	-63.385					45.5	-65.3076
45.55	-62.2559						45.55	-63.385					45.55	-63.4766
45.6	-64.3921						45.6	-63.6291					45.6	-65.0024
45.65	-61.6455						45.65	-63.4766					45.65	-63.7817
45.7	-63.4766						45.7	-63.2935					45.7	-64.3921
45.75	-60.73						45.75	-63.6291					45.75	-64.0869
45.8	-62.8662						45.8	-63.5986					45.8	-64.6973
45.85	-64.3921						45.85	-63.2019					45.85	-65.0024
45.9	-60.73						45.9	-63.6597					45.9	-63.4766
45.95	-61.9507						45.95	-63.5681					45.95	-66.5283
46	-63.1714						46	-63.4155					46	-63.4766
46.05	-62.2559						46.05	-63.4155					46.05	-65.6128
46.1	-63.4766						46.1	-63.6597					46.1	-62.8662
46.15	-60.73						46.15	-63.5071					46.15	-65.6128
46.2	-63.4766						46.2	-63.2629					46.2	-62.8662
46.25	-65.0024						46.25	-63.5986					46.25	-64.3921
46.3	-60.73						46.3	-63.6291					46.3	-64.3921
46.35	-62.2559						46.35	-63.4155					46.35	-64.0869
46.4	-63.4766						46.4	-63.2935					46.4	-65.918
46.45	-62.561						46.45	-63.6902					46.45	-63.4766
46.5	-64.0869						46.5	-63.6902					46.5	-66.2231
46.55	-60.73						46.55	-63.2629					46.55	-62.8662
46.6	-63.4766						46.6	-63.446					46.6	-65.3076
46.65	-64.6973						46.65	-63.7207					46.65	-63.1714
46.7	-61.3403						46.7	-63.5986					46.7	-65.0024
46.75	-62.8662						46.75	-63.1714					46.75	-65.0024
46.8	-64.0869						46.8	-63.5376					46.8	-64.0869
46.85	-61.6455						46.85	-63.6597					46.85	-65.918
46.9	-63.4766						46.9	-63.5071					46.9	-62.8662
46.95	-63.7817						46.95	-63.2324					46.95	-65.918
47	-61.6455						47	-63.5376					47	-62.561
47.05	-64.0869						47.05	-63.7207					47.05	-64.6973
47.1	-62.561						47.1	-63.5681					47.1	-64.0869
47.15	-62.561						47.15	-63.2324					47.15	-63.7817
47.2	-64.3921						47.2	-63.5681					47.2	-65.6128
47.25	-61.9507						47.25	-63.7207					47.25	-62.561
47.3	-61.3403						47.3	-63.5681					47.3	-65.0024
47.35	-64.0869						47.35	-63.3545					47.35	-61.9507
47.4	-62.2559						47.4	-63.5071					47.4	-64.3921
47.45	-62.561						47.45	-63.7817					47.45	-65.3076
47.5	-64.0869						47.5	-63.6291					47.5	-63.4766
47.55	-61.9507						47.55	-63.4155					47.55	-66.2231
47.6	-63.1714						47.6	-63.5071					47.6	-62.2559
47.65	-64.0869						47.65	-63.8123					47.65	-65.0024
47.7	-60.73						47.7	-63.8428					47.7	-62.8662
47.75	-62.8662						47.75	-63.5071					47.75	-64.3921
47.8	-65.0024						47.8	-63.446					47.8	-64.6973
47.85	-61.9507						47.85	-63.7817					47.85	-62.8662
47.9	-61.9507						47.9	-63.7817					47.9	-64.6973
47.95	-64.0869						47.95	-63.5681					47.95	-63.4766
48	-62.561						48	-63.4155					48	-64.0869
48.05	-62.2559						48.05	-63.6597					48.05	-64.6973
48.1	-63.4766						48.1	-63.8123					48.1	-61.9507
48.15	-62.561						48.15	-63.7512					48.15	-65.3076
48.2	-62.2559						48.2	-63.5071					48.2	-62.8662
48.25	-63.4766						48.25	-63.3545					48.25	-65.3076
48.3	-63.1714						48.3	-63.8123					48.3	-64.6973
48.35	-61.3403						48.35	-63.6902					48.35	-62.561
48.4	-64.3921						48.4	-63.6597					48.4	-65.6128
48.45	-62.8662						48.45	-63.385					48.45	-62.561
48.5	-61.9507						48.5	-63.5071					48.5	-63.4766
48.55	-63.4766						48.55	-63.6902					48.55	-65.3076
48.6	-63.4766						48.6	-63.6902					48.6	-63.4766
48.65	-61.6455						48.65	-63.6291					48.65	-65.6128
48.7	-64.6973						48.7	-63.324					48.7	-62.561
48.75	-61.3403						48.75	-63.2935					48.75	-63.7817
48.8	-63.4766						48.8	-63.6291					48.8	-66.2231
48.85	-63.7817						48.85	-63.6597					48.85	-63.1714
48.9	-62.561						48.9	-63.6291					48.9	-65.0024
48.95	-64.0869						48.95	-63.2935					48.95	-65.0024
49	-61.3403						49	-63.2324					49	-63.4766
49.05	-64.0869						49.05	-63.5376					49.05	-66.2231
49.1	-61.3403						49.1	-63.6597					49.1	-63.4766
49.15	-63.4766						49.15	-63.5681					49.15	-63.4766
49.2	-60.73						49.2	-63.3545					49.2	-66.5283
49.25	-63.7817						49.25	-63.2324					49.25	-62.8662
49.3	-61.6455						49.3	-63.4155					49.3	-65.3076
49.35	-62.8662						49.35	-63.6291					49.35	-65.0024
49.4	-60.4248						49.4	-63.446					49.4	-63.7817
49.45	-64.0869						49.45	-63.5071					49.45	-65.918
49.5	-61.9507						49.5	-63.3545					49.5	-64.6973
49.55	-65.0024						49.55	-63.2935					49.55	-64.0869
49.6	-60.4248						49.6	-63.4155					49.6	-66.2231
49.65	-64.3921						49.65	-63.5376					49.65	-64.3921
49.7	-61.9507						49.7	-63.5071					49.7	-64.6973
49.75	-64.3921						49.75	-63.446					49.75	-66.2231
49.8	-61.6455						49.8	-63.2935					49.8	-63.4766
49.85	-64.3921						49.85	-63.1103					49.85	-65.6128
49.9	-63.1714						49.9	-63.2935					49.9	-65.918
49.95	-62.2559						49.95	-63.5376					49.95	-63.4766
50	-63.1714						50	-63.4766					50	-65.3076
50.05	-62.561						50.05	-63.446					50.05	-66.2231
50.1	-63.7817						50.1	-63.2629					50.1	-63.1714
50.15	-62.561						50.15	-63.1409					50.15	-65.6128
50.2	-64.6973						50.2	-63.1714					50.2	-65.0024
50.25	-62.2559						50.25	-63.3545					50.25	-64.0869
50.3	-65.3076						50.3	-63.4766					50.3	-65.6128
50.35	-61.6455						50.35	-63.385					50.35	-65.3076
50.4	-64.6973						50.4	-63.3545					50.4	-64.0869
50.45	-62.561						50.45	-63.1714					50.45	-65.918
50.5	-65.918						50.5	-63.0188					50.5	-64.6973
50.55	-61.3403						50.55	-63.2019					50.55	-63.4766
50.6	-65.0024						50.6	-63.3545					50.6	-65.0024
50.65	-62.561						50.65	-63.4155					50.65	-65.918
50.7	-65.3076						50.7	-63.4155					50.7	-63.4766
50.75	-61.6455						50.75	-63.385					50.75	-65.3076
50.8	-64.6973						50.8	-63.2324					50.8	-65.6128
50.85	-61.9507						50.85	-63.2019					50.85	-63.7817
50.9	-64.3921						50.9	-63.0493					50.9	-65.3076
50.95	-61.0352						50.95	-63.2324					50.95	-65.6128
51	-63.7817						51	-63.3545					51	-63.1714
51.05	-62.561						51.05	-63.385					51.05	-65.3076
51.1	-64.0869						51.1	-63.385					51.1	-66.2231
51.15	-63.4766						51.15	-63.385					51.15	-62.561
51.2	-62.8662						51.2	-63.2629					51.2	-65.0024
51.25	-64.6973						51.25	-63.2019					51.25	-65.6128
51.3	-63.1714						51.3	-63.0798					51.3	-63.1714
51.35	-65.0024						51.35	-63.1409					51.35	-64.3921
51.4	-62.561						51.4	-63.2324					51.4	-66.2231
51.45	-65.0024						51.45	-63.446					51.45	-62.8662
51.5	-61.9507						51.5	-63.385					51.5	-65.6128
51.55	-63.7817						51.55	-63.446					51.55	-65.3076
51.6	-62.2559						51.6	-63.324					51.6	-64.0869
51.65	-63.7817						51.65	-63.324					51.65	-67.1387
51.7	-64.0869						51.7	-63.2324					51.7	-62.8662
51.75	-62.561						51.75	-63.2324					51.75	-64.6973
51.8	-65.0024						51.8	-63.0188					51.8	-64.0869
51.85	-61.9507						51.85	-63.1409					51.85	-65.0024
51.9	-65.0024						51.9	-63.385					51.9	-65.0024
51.95	-62.2559						51.95	-63.5376					51.95	-64.0869
52	-63.7817						52	-63.385					52	-65.0024
52.05	-63.7817						52.05	-63.385					52.05	-64.6973
52.1	-63.1714						52.1	-63.2935					52.1	-65.3076
52.15	-64.6973						52.15	-63.1103					52.15	-63.7817
52.2	-61.6455						52.2	-63.2019					52.2	-64.6973
52.25	-65.0024						52.25	-63.446					52.25	-65.0024
52.3	-61.6455						52.3	-63.3545					52.3	-64.6973
52.35	-64.6973						52.35	-63.1714					52.35	-64.3921
52.4	-62.561						52.4	-63.0493					52.4	-63.4766
52.45	-63.7817						52.45	-63.4155					52.45	-65.3076
52.5	-65.0024						52.5	-63.385					52.5	-63.7817
52.55	-62.2559						52.55	-63.0188					52.55	-65.3076
52.6	-64.6973						52.6	-63.2324					52.6	-62.561
52.65	-61.6455						52.65	-63.385					52.65	-66.5283
52.7	-64.3921						52.7	-63.1409					52.7	-63.1714
52.75	-63.7817						52.75	-63.2324					52.75	-65.6128
52.8	-62.8662						52.8	-63.4155					52.8	-62.2559
52.85	-63.4766						52.85	-63.1714					52.85	-66.5283
52.9	-62.561						52.9	-63.2019					52.9	-64.6973
52.95	-65.0024						52.95	-63.324					52.95	-65.3076
53	-61.3403						53	-63.0493					53	-64.6973
53.05	-62.561						53.05	-63.2935					53.05	-64.6973
53.1	-63.7817						53.1	-63.2935					53.1	-65.918
53.15	-62.561						53.15	-62.9578					53.15	-62.8662
53.2	-65.0024						53.2	-63.4155					53.2	-65.3076
53.25	-61.9507						53.25	-63.2019					53.25	-62.8662
53.3	-64.6973						53.3	-63.0188					53.3	-65.6128
53.35	-63.4766						53.35	-63.4155					53.35	-62.8662
53.4	-62.561						53.4	-62.9578					53.4	-65.3076
53.45	-63.7817						53.45	-63.2935					53.45	-63.7817
53.5	-61.6455						53.5	-63.3545					53.5	-65.918
53.55	-64.3921						53.55	-62.9578					53.55	-62.8662
53.6	-62.561						53.6	-63.446					53.6	-65.6128
53.65	-61.6455						53.65	-63.385					53.65	-62.561
53.7	-65.3076						53.7	-62.9883					53.7	-65.6128
53.75	-61.9507						53.75	-63.4766					53.75	-62.8662
53.8	-64.6973						53.8	-63.385					53.8	-65.6128
53.85	-62.2559						53.85	-63.0188					53.85	-65.6128
53.9	-63.4766						53.9	-63.446					53.9	-64.6973
53.95	-65.3076						53.95	-63.5071					53.95	-65.0024
54	-61.6455						54	-63.0798					54	-64.0869
54.05	-63.4766						54.05	-63.446					54.05	-66.5283
54.1	-63.7817						54.1	-63.446					54.1	-63.4766
54.15	-62.561						54.15	-63.1409					54.15	-65.6128
54.2	-65.3076						54.2	-63.385					54.2	-62.561
54.25	-61.6455						54.25	-63.5376					54.25	-65.918
54.3	-64.0869						54.3	-63.2935					54.3	-62.8662
54.35	-64.6973						54.35	-63.2629					54.35	-64.3921
54.4	-61.9507						54.4	-63.5071					54.4	-64.3921
54.45	-64.3921						54.45	-63.4766					54.45	-64.6973
54.5	-63.7817						54.5	-63.1409					54.5	-65.918
54.55	-62.561						54.55	-63.446					54.55	-62.8662
54.6	-65.0024						54.6	-63.5681					54.6	-65.918
54.65	-61.0352						54.65	-63.3545					54.65	-62.8662
54.7	-63.4766						54.7	-63.2324					54.7	-65.3076
54.75	-65.6128						54.75	-63.6291					54.75	-63.4766
54.8	-61.9507						54.8	-63.5071					54.8	-64.3921
54.85	-63.4766						54.85	-63.324					54.85	-64.3921
54.9	-64.3921						54.9	-63.2935					54.9	-63.4766
54.95	-62.2559						54.95	-63.6902					54.95	-65.6128
55	-63.7817						55	-63.5376					55	-62.8662
55.05	-62.8662						55.05	-63.1714					55.05	-66.5283
55.1	-63.4766						55.1	-63.446					55.1	-63.7817
55.15	-65.0024						55.15	-63.7207					55.15	-65.6128
55.2	-61.9507						55.2	-63.5376					55.2	-62.561
55.25	-62.8662						55.25	-63.2019					55.25	-64.0869
55.3	-65.3076						55.3	-63.5376					55.3	-64.3921
55.35	-61.6455						55.35	-63.6597					55.35	-64.6973
55.4	-63.7817						55.4	-63.5376					55.4	-65.0024
55.45	-64.3921						55.45	-63.2019					55.45	-63.1714
55.5	-62.2559						55.5	-63.6597					55.5	-66.2231
55.55	-64.0869						55.55	-63.7207					55.55	-63.1714
55.6	-64.6973						55.6	-63.5376					55.6	-64.6973
55.65	-60.73						55.65	-63.2324					55.65	-64.6973
55.7	-63.7817						55.7	-63.6291					55.7	-65.0024
55.75	-64.6973						55.75	-63.7207					55.75	-66.5283
55.8	-61.9507						55.8	-63.6597					55.8	-64.0869
55.85	-63.1714						55.85	-63.2324					55.85	-65.3076
55.9	-64.0869						55.9	-63.6291					55.9	-63.4766
55.95	-61.9507						55.95	-63.8123					55.95	-65.3076
56	-63.7817						56	-63.7512					56	-65.3076
56.05	-64.6973						56.05	-63.5071					56.05	-63.7817
56.1	-61.9507						56.1	-63.5071					56.1	-66.5283
56.15	-64.0869						56.15	-63.8733					56.15	-63.7817
56.2	-64.6973						56.2	-63.7512					56.2	-65.3076
56.25	-61.3403						56.25	-63.6291					56.25	-64.6973
56.3	-63.1714						56.3	-63.4766					56.3	-64.3921
56.35	-64.6973						56.35	-63.8123					56.35	-66.8335
56.4	-61.6455						56.4	-63.8428					56.4	-62.8662
56.45	-63.1714						56.45	-63.8123					56.45	-65.3076
56.5	-64.6973						56.5	-63.5681					56.5	-65.0024
56.55	-62.2559						56.55	-63.6291					56.55	-64.6973
56.6	-62.8662						56.6	-63.9343					56.6	-66.5283
56.65	-64.3921						56.65	-63.9343					56.65	-62.8662
56.7	-62.2559						56.7	-63.7207					56.7	-65.6128
56.75	-62.561						56.75	-63.4766					56.75	-65.3076
56.8	-64.6973						56.8	-63.7817					56.8	-63.7817
56.85	-62.2559						56.85	-63.9648					56.85	-66.2231
56.9	-61.9507						56.9	-63.8428					56.9	-63.1714
56.95	-65.0024						56.95	-63.6597					56.95	-65.6128
57	-62.2559						57	-63.5376					57	-65.0024
57.05	-63.4766						57.05	-63.8733					57.05	-64.0869
57.1	-63.7817						57.1	-63.9648					57.1	-66.5283
57.15	-62.561						57.15	-63.8428					57.15	-63.1714
57.2	-65.0024						57.2	-63.8123					57.2	-64.3921
57.25	-61.6455						57.25	-63.5986					57.25	-65.6128
57.3	-64.0869						57.3	-63.9038					57.3	-63.7817
57.35	-62.2559						57.35	-64.0259					57.35	-65.6128
57.4	-64.6973						57.4	-64.1174					57.4	-63.1714
57.45	-62.561						57.45	-63.9343					57.45	-64.6973
57.5	-63.1714						57.5	-63.7207					57.5	-66.5283
57.55	-63.1714						57.55	-63.8123					57.55	-63.7817
57.6	-64.0869						57.6	-64.209					57.6	-65.6128
57.65	-62.2559						57.65	-64.0564					57.65	-65.3076
57.7	-64.0869						57.7	-64.1174					57.7	-64.0869
57.75	-62.8662						57.75	-63.9038					57.75	-65.918
57.8	-65.0024						57.8	-63.7817					57.8	-64.6973
57.85	-61.9507						57.85	-64.0259					57.85	-63.7817
57.9	-63.7817						57.9	-64.209					57.9	-65.918
57.95	-61.6455						57.95	-64.1174					57.95	-63.4766
58	-65.0024						58	-64.1479					58	-64.0869
58.05	-61.3403						58.05	-63.9648					58.05	-66.2231
58.1	-64.3921						58.1	-63.8733					58.1	-63.4766
58.15	-61.9507						58.15	-64.0869					58.15	-65.0024
58.2	-65.918						58.2	-64.331					58.2	-66.2231
58.25	-62.2559						58.25	-64.1785					58.25	-62.2559
58.3	-64.6973						58.3	-64.1479					58.3	-65.3076
58.35	-63.1714						58.35	-64.0564					58.35	-65.3076
58.4	-64.0869						58.4	-63.9648					58.4	-63.7817
58.45	-63.4766						58.45	-64.0259					58.45	-65.0024
58.5	-63.1714						58.5	-64.27					58.5	-65.3076
58.55	-64.0869						58.55	-64.3005					58.55	-63.7817
58.6	-62.2559						58.6	-64.2395					58.6	-65.3076
58.65	-64.0869						58.65	-64.27					58.65	-63.7817
58.7	-61.9507						58.7	-63.8428					58.7	-63.1714
58.75	-64.3921						58.75	-63.9954					58.75	-65.3076
58.8	-61.9507						58.8	-64.1785					58.8	-64.6973
58.85	-63.7817						58.85	-64.3921					58.85	-63.1714
58.9	-61.9507						58.9	-64.27					58.9	-64.6973
58.95	-64.3921						58.95	-64.209					58.95	-64.3921
59	-61.9507						59	-64.1479					59	-63.7817
59.05	-63.7817						59.05	-63.9954					59.05	-64.6973
59.1	-62.2559						59.1	-63.9343					59.1	-64.3921
59.15	-64.0869						59.15	-64.1174					59.15	-63.1714
59.2	-63.1714						59.2	-64.2395					59.2	-65.6128
59.25	-63.1714						59.25	-64.3005					59.25	-64.6973
59.3	-63.4766						59.3	-64.2395					59.3	-62.8662
59.35	-63.4766						59.35	-64.2395					59.35	-65.918
59.4	-64.6973						59.4	-64.1479					59.4	-65.918
59.45	-62.8662						59.45	-63.9343					59.45	-62.8662
59.5	-64.3921						59.5	-63.8733					59.5	-65.3076
59.55	-62.561						59.55	-64.0259					59.55	-66.2231
59.6	-65.6128						59.6	-64.3005					59.6	-62.8662
59.65	-61.6455						59.65	-64.27					59.65	-64.3921
59.7	-64.0869						59.7	-64.27					59.7	-65.3076
59.75	-62.561						59.75	-64.1785					59.75	-63.7817
59.8	-63.4766						59.8	-64.1785					59.8	-65.3076
59.85	-63.4766						59.85	-64.0564					59.85	-65.918
59.9	-62.561						59.9	-63.9343					59.9	-62.8662
59.95	-65.0024						59.95	-63.8428					59.95	-65.918
60	-61.9507						60	-63.9038					60	-64.0869
60.05	-65.0024						60.05	-64.0869					60.05	-65.0024
60.1	-61.9507						60.1	-64.27					60.1	-65.3076
60.15	-64.0869						60.15	-64.1785					60.15	-64.3921
60.2	-62.2559						60.2	-64.1174					60.2	-66.2231
60.25	-63.7817						60.25	-64.1479					60.25	-63.4766
60.3	-63.7817						60.3	-64.0564					60.3	-66.5283
60.35	-62.561						60.35	-63.8733					60.35	-63.7817
60.4	-65.0024						60.4	-63.8123					60.4	-66.8335
60.45	-62.2559						60.45	-64.1174					60.45	-63.4766
60.5	-63.7817						60.5	-64.1785					60.5	-66.2231
60.55	-61.9507						60.55	-64.1174					60.55	-63.4766
60.6	-63.7817						60.6	-63.8123					60.6	-66.8335
60.65	-62.8662						60.65	-63.8428					60.65	-63.7817
60.7	-62.8662						60.7	-64.1479					60.7	-66.8335
60.75	-64.0869						60.75	-64.1174					60.75	-64.6973
60.8	-61.9507						60.8	-63.8733					60.8	-66.5283
60.85	-65.3076						60.85	-63.8733					60.85	-64.3921
60.9	-61.3403						60.9	-64.1785					60.9	-65.918
60.95	-63.4766						60.95	-64.0869					60.95	-65.0024
61	-64.0869						61	-63.7512					61	-64.3921
61.05	-63.4766						61.05	-64.2395					61.05	-65.0024
61.1	-65.0024						61.1	-64.0869					61.1	-62.8662
61.15	-61.6455						61.15	-63.7817					61.15	-67.1387
61.2	-65.3076						61.2	-64.1174					61.2	-63.4766
61.25	-62.2559						61.25	-64.0869					61.25	-66.2231
61.3	-63.7817						61.3	-63.8733					61.3	-63.7817
61.35	-64.0869						61.35	-64.1479					61.35	-67.1387
61.4	-63.4766						61.4	-63.9038					61.4	-64.0869
61.45	-65.6128						61.45	-64.1174					61.45	-65.918
61.5	-62.2559						61.5	-64.1174					61.5	-63.7817
61.55	-64.0869						61.55	-63.6597					61.55	-66.2231
61.6	-63.1714						61.6	-64.1174					61.6	-64.3921
61.65	-63.7817						61.65	-64.1479					61.65	-65.6128
61.7	-65.0024						61.7	-63.8123					61.7	-64.0869
61.75	-61.9507						61.75	-64.1174					61.75	-65.918
61.8	-65.0024						61.8	-63.9954					61.8	-65.3076
61.85	-62.8662						61.85	-63.9648					61.85	-65.6128
61.9	-63.1714						61.9	-64.2395					61.9	-64.3921
61.95	-64.0869						61.95	-63.8733					61.95	-65.918
62	-62.561						62	-63.9343					62	-64.6973
62.05	-64.6973						62.05	-64.1479					62.05	-66.8335
62.1	-61.9507						62.1	-63.9343					62.1	-64.0869
62.15	-63.1714						62.15	-63.9343					62.15	-65.918
62.2	-65.0024						62.2	-64.0869					62.2	-63.4766
62.25	-61.9507						62.25	-63.9648					62.25	-65.918
62.3	-64.3921						62.3	-63.9038					62.3	-63.1714
62.35	-63.7817						62.35	-64.0869					62.35	-65.3076
62.4	-63.4766						62.4	-63.9954					62.4	-64.6973
62.45	-65.0024						62.45	-63.7817					62.45	-65.918
62.5	-62.2559						62.5	-64.1785					62.5	-64.0869
62.55	-63.1714						62.55	-64.0564					62.55	-64.3921
62.6	-64.6973						62.6	-63.7512					62.6	-66.5283
62.65	-62.8662						62.65	-64.0259					62.65	-64.3921
62.7	-64.6973						62.7	-64.0869					62.7	-66.2231
62.75	-63.1714						62.75	-63.8733					62.75	-63.1714
62.8	-64.0869						62.8	-63.7207					62.8	-66.8335
62.85	-65.3076						62.85	-64.0869					62.85	-63.4766
62.9	-61.6455						62.9	-63.9648					62.9	-66.2231
62.95	-63.4766						62.95	-63.7207					62.95	-63.1714
63	-64.6973						63	-63.8123					63	-65.918
63.05	-62.561						63.05	-64.0869					63.05	-65.3076
63.1	-64.3921						63.1	-63.8733					63.1	-65.0024
63.15	-62.8662						63.15	-63.6597					63.15	-65.3076
63.2	-63.4766						63.2	-63.9648					63.2	-64.3921
63.25	-64.3921						63.25	-63.9343					63.25	-67.1387
63.3	-61.6455						63.3	-63.8428					63.3	-64.0869
63.35	-62.561						63.35	-63.5986					63.35	-65.3076
63.4	-65.6128						63.4	-63.9954					63.4	-64.3921
63.45	-61.9507						63.45	-63.9038					63.45	-65.918
63.5	-64.0869						63.5	-63.7817					63.5	-65.3076
63.55	-65.0024						63.55	-63.7207					63.55	-63.7817
63.6	-61.3403						63.6	-63.9954					63.6	-67.1387
63.65	-64.0869						63.65	-63.9038					63.65	-63.4766
63.7	-64.0869						63.7	-63.6902					63.7	-66.2231
63.75	-62.561						63.75	-63.7207					63.75	-63.1714
63.8	-64.3921						63.8	-63.9954					63.8	-65.0024
63.85	-63.7817						63.85	-63.8733					63.85	-65.918
63.9	-62.2559						63.9	-63.6597					63.9	-64.3921
63.95	-63.7817						63.95	-63.5986					63.95	-66.5283
64	-63.1714						64	-63.8428					64	-63.1714
64.05	-62.2559						64.05	-63.8123					64.05	-66.5283
64.1	-64.6973						64.1	-63.7512					64.1	-62.8662
64.15	-61.3403						64.15	-63.5681					64.15	-65.3076
64.2	-61.9507						64.2	-63.8733					64.2	-65.3076
64.25	-64.6973						64.25	-63.8123					64.25	-64.0869
64.3	-62.561						64.3	-63.7512					64.3	-65.6128
64.35	-62.2559						64.35	-63.446					64.35	-63.4766
64.4	-64.0869						64.4	-63.7512					64.4	-65.3076
64.45	-63.4766						64.45	-63.8428					64.45	-64.0869
64.5	-62.561						64.5	-63.8428					64.5	-64.3921
64.55	-63.7817						64.55	-63.5986					64.55	-66.2231
64.6	-62.561						64.6	-63.5986					64.6	-63.4766
64.65	-62.8662						64.65	-63.7817					64.65	-64.3921
64.7	-64.3921						64.7	-63.8123					64.7	-62.8662
64.75	-63.7817						64.75	-63.6597					64.75	-64.0869
64.8	-61.6455						64.8	-63.385					64.8	-65.918
64.85	-64.6973						64.85	-63.6291					64.85	-63.7817
64.9	-64.0869						64.9	-63.8428					64.9	-65.918
64.95	-61.9507						64.95	-63.7512					64.95	-63.4766
65	-63.1714						65	-63.5071					65	-65.3076
65.05	-65.0024						65.05	-63.385					65.05	-65.6128
65.1	-62.2559						65.1	-63.6902					65.1	-63.4766
65.15	-63.7817						65.15	-63.6902					65.15	-65.918
65.2	-64.0869						65.2	-63.5681					65.2	-63.4766
65.25	-62.561						65.25	-63.4155					65.25	-64.6973
65.3	-63.7817						65.3	-63.446					65.3	-65.3076
65.35	-63.7817						65.35	-63.7207					65.35	-62.561
65.4	-62.2559						65.4	-63.5986					65.4	-64.6973
65.45	-65.3076						65.45	-63.5681					65.45	-63.7817
65.5	-62.561						65.5	-63.4155					65.5	-64.0869
65.55	-64.0869						65.55	-63.2935					65.55	-65.918
65.6	-62.8662						65.6	-63.5071					65.6	-62.8662
65.65	-63.1714						65.65	-63.5681					65.65	-65.0024
65.7	-63.7817						65.7	-63.5986					65.7	-65.0024
65.75	-62.2559						65.75	-63.3545					65.75	-62.2559
65.8	-64.3921						65.8	-63.1714					65.8	-65.0024
65.85	-62.561						65.85	-63.4155					65.85	-64.0869
65.9	-65.0024						65.9	-63.5986					65.9	-64.3921
65.95	-62.2559						65.95	-63.4766					65.95	-65.6128
66	-64.3921						66	-63.385					66	-62.561
66.05	-62.8662						66.05	-63.1714					66.05	-65.3076
66.1	-63.7817						66.1	-63.1103					66.1	-65.918
66.15	-62.561						66.15	-63.4155					66.15	-63.1714
66.2	-63.7817						66.2	-63.446					66.2	-64.6973
66.25	-64.3921						66.25	-63.4155					66.25	-65.0024
66.3	-61.9507						66.3	-63.324					66.3	-63.4766
66.35	-63.4766						66.35	-63.0798					66.35	-65.6128
66.4	-62.561						66.4	-63.1409					66.4	-62.561
66.45	-64.0869						66.45	-63.385					66.45	-64.6973
66.5	-61.3403						66.5	-63.385					66.5	-66.8335
66.55	-63.7817						66.55	-63.385					66.55	-62.8662
66.6	-61.0352						66.6	-63.2019					66.6	-63.7817
66.65	-65.3076						66.65	-63.0188					66.65	-65.918
66.7	-60.73						66.7	-63.0188					66.7	-63.1714
66.75	-65.0024						66.75	-63.2935					66.75	-64.6973
66.8	-62.8662						66.8	-63.2935					66.8	-65.0024
66.85	-64.3921						66.85	-63.2019					66.85	-62.2559
66.9	-62.8662						66.9	-63.2019					66.9	-65.6128
66.95	-63.7817						66.95	-63.1103					66.95	-65.6128
67	-63.4766						67	-62.9578					67	-62.2559
67.05	-62.8662						67.05	-62.8967					67.05	-65.6128
67.1	-63.4766						67.1	-63.2019					67.1	-65.6128
67.15	-62.561						67.15	-63.2629					67.15	-62.8662
67.2	-63.4766						67.2	-63.2019					67.2	-65.918
67.25	-62.8662						67.25	-63.1409					67.25	-65.6128
67.3	-63.4766						67.3	-63.0188					67.3	-63.4766
67.35	-63.1714						67.35	-62.8357					67.35	-65.0024
67.4	-62.8662						67.4	-62.8662					67.4	-65.6128
67.45	-64.3921						67.45	-63.0188					67.45	-63.1714
67.5	-62.561						67.5	-63.1103					67.5	-65.918
67.55	-64.0869						67.55	-63.1409					67.55	-65.3076
67.6	-63.1714						67.6	-63.1409					67.6	-62.8662
67.65	-64.0869						67.65	-63.0493					67.65	-65.3076
67.7	-62.2559						67.7	-62.8967					67.7	-66.5283
67.75	-65.0024						67.75	-62.7136					67.75	-61.9507
67.8	-61.3403						67.8	-62.8052					67.8	-64.6973
67.85	-63.7817						67.85	-62.8967					67.85	-66.2231
67.9	-61.9507						67.9	-63.0188					67.9	-63.1714
67.95	-63.4766						67.95	-63.1714					67.95	-64.6973
68	-63.1714						68	-63.0798					68	-66.2231
68.05	-62.2559						68.05	-63.0188					68.05	-63.7817
68.1	-64.3921						68.1	-62.9272					68.1	-64.6973
68.15	-62.8662						68.15	-62.9272					68.15	-65.3076
68.2	-64.0869						68.2	-62.7441					68.2	-62.561
68.25	-61.9507						68.25	-62.7136					68.25	-65.918
68.3	-65.6128						68.3	-62.7747					68.3	-65.3076
68.35	-61.9507						68.35	-62.9272					68.35	-63.7817
68.4	-63.7817						68.4	-63.1409					68.4	-66.2231
68.45	-61.0352						68.45	-63.0798					68.45	-64.0869
68.5	-64.3921						68.5	-62.9883					68.5	-65.6128
68.55	-64.0869						68.55	-63.0493					68.55	-62.2559
68.6	-62.8662						68.6	-62.9272					68.6	-65.3076
68.65	-64.0869						68.65	-62.8052					68.65	-63.7817
68.7	-61.9507						68.7	-62.7441					68.7	-65.0024
68.75	-65.0024						68.75	-62.9578					68.75	-63.4766
68.8	-61.0352						68.8	-63.2019					68.8	-65.0024
68.85	-63.7817						68.85	-63.0798					68.85	-63.7817
68.9	-62.561						68.9	-62.8967					68.9	-65.6128
68.95	-63.4766						68.95	-62.7136					68.95	-62.2559
69	-64.3921						69	-62.9578					69	-65.3076
69.05	-62.561						69.05	-63.0188					69.05	-62.8662
69.1	-65.0024						69.1	-62.9272					69.1	-65.3076
69.15	-61.6455						69.15	-62.6831					69.15	-62.8662
69.2	-63.1714						69.2	-63.1409					69.2	-65.6128
69.25	-62.8662						69.25	-63.0493					69.25	-62.561
69.3	-62.8662						69.3	-62.8357					69.3	-65.3076
69.35	-63.7817						69.35	-62.8967					69.35	-63.4766
69.4	-61.9507						69.4	-63.0188					69.4	-65.0024
69.45	-64.6973						69.45	-62.7747					69.45	-64.0869
69.5	-61.9507						69.5	-62.9578					69.5	-64.3921
69.55	-64.0869						69.55	-63.0493					69.55	-65.3076
69.6	-61.6455						69.6	-62.6831					69.6	-63.1714
69.65	-64.0869						69.65	-62.9578					69.65	-64.3921
69.7	-65.3076						69.7	-63.0188					69.7	-62.8662
69.75	-62.561						69.75	-62.5915					69.75	-65.918
69.8	-64.6973						69.8	-63.1103					69.8	-62.561
69.85	-61.9507						69.85	-62.8052					69.85	-65.918
69.9	-63.7817						69.9	-62.7441					69.9	-63.4766
69.95	-64.0869						69.95	-62.9883					69.95	-65.918
70	-62.561						70	-62.7441					70	-63.7817
70.05	-65.0024						70.05	-62.8662					70.05	-65.0024
70.1	-62.561						70.1	-62.9272					70.1	-64.0869
70.15	-64.0869						70.15	-62.5					70.15	-66.2231
70.2	-62.8662						70.2	-62.9883					70.2	-63.4766
70.25	-63.1714						70.25	-62.8967					70.25	-65.3076
70.3	-65.0024						70.3	-62.4695					70.3	-63.7817
70.35	-60.73						70.35	-62.9578					70.35	-66.8335
70.4	-63.7817						70.4	-62.8662					70.4	-63.1714
70.45	-63.4766						70.45	-62.5					70.45	-65.6128
70.5	-62.8662						70.5	-62.8967					70.5	-63.4766
70.55	-65.3076						70.55	-62.7136					70.55	-65.918
70.6	-61.3403						70.6	-62.439					70.6	-62.8662
70.65	-63.7817						70.65	-62.9272					70.65	-65.3076
70.7	-64.6973						70.7	-62.8052					70.7	-64.6973
70.75	-62.2559						70.75	-62.4084					70.75	-65.3076
70.8	-64.6973						70.8	-62.8052					70.8	-65.6128
70.85	-61.3403						70.85	-62.8357					70.85	-64.0869
70.9	-63.4766						70.9	-62.6526					70.9	-66.2231
70.95	-64.3921						70.95	-62.561					70.95	-64.0869
71	-61.6455						71	-62.9578					71	-65.918
71.05	-63.7817						71.05	-62.8052					71.05	-63.7817
71.1	-63.1714						71.1	-62.4695					71.1	-65.6128
71.15	-62.8662						71.15	-62.7747					71.15	-64.0869
71.2	-65.0024						71.2	-62.8967					71.2	-65.0024
71.25	-61.0352						71.25	-62.7136					71.25	-64.0869
71.3	-63.7817						71.3	-62.561					71.3	-65.3076
71.35	-65.0024						71.35	-62.8052					71.35	-65.6128
71.4	-61.6455						71.4	-62.8662					71.4	-63.7817
71.45	-64.3921						71.45	-62.4695					71.45	-65.918
71.5	-63.1714						71.5	-62.7747					71.5	-64.0869
71.55	-62.561						71.55	-62.8967					71.55	-66.2231
71.6	-64.3921						71.6	-62.8357					71.6	-62.8662
71.65	-60.73						71.65	-62.5					71.65	-65.0024
71.7	-62.2559						71.7	-62.8357					71.7	-65.3076
71.75	-64.3921						71.75	-62.8662					71.75	-64.6973
71.8	-61.0352						71.8	-62.7441					71.8	-65.6128
71.85	-63.1714						71.85	-62.561					71.85	-63.4766
71.9	-63.1714						71.9	-62.8662					71.9	-66.2231
71.95	-61.9507						71.95	-62.8967					71.95	-63.1714
72	-64.0869						72	-62.7441					72	-66.2231
72.05	-63.7817						72.05	-62.561					72.05	-63.7817
72.1	-61.0352						72.1	-62.8967					72.1	-65.0024
72.15	-64.0869						72.15	-62.8052					72.15	-65.3076
72.2	-63.7817						72.2	-62.7747					72.2	-64.0869
72.25	-61.6455						72.25	-62.5915					72.25	-65.6128
72.3	-63.1714						72.3	-62.8662					72.3	-63.1714
72.35	-63.7817						72.35	-62.8967					72.35	-65.6128
72.4	-62.561						72.4	-62.7441					72.4	-64.0869
72.45	-64.3921						72.45	-62.6221					72.45	-64.3921
72.5	-62.561						72.5	-62.8967					72.5	-65.6128
72.55	-63.1714						72.55	-62.8662					72.55	-63.7817
72.6	-64.6973						72.6	-62.7136					72.6	-66.5283
72.65	-62.8662						72.65	-62.561					72.65	-62.2559
72.7	-61.9507						72.7	-62.7747					72.7	-65.0024
72.75	-64.0869						72.75	-62.8662					72.75	-65.3076
72.8	-63.7817						72.8	-62.8967					72.8	-64.3921
72.85	-61.0352						72.85	-62.5305					72.85	-65.3076
72.9	-64.0869						72.9	-62.6831					72.9	-62.561
72.95	-63.4766						72.95	-62.8662					72.95	-65.3076
73	-61.6455						73	-62.8662					73	-63.1714
73.05	-63.1714						73.05	-62.7747					73.05	-64.0869
73.1	-63.7817						73.1	-62.5					73.1	-65.0024
73.15	-61.3403						73.15	-62.8052					73.15	-62.2559
73.2	-64.0869						73.2	-62.9883					73.2	-65.0024
73.25	-63.4766						73.25	-62.8357					73.25	-63.4766
73.3	-60.4248						73.3	-62.6831					73.3	-62.8662
73.35	-62.561						73.35	-62.5915					73.35	-65.0024
73.4	-63.7817						73.4	-62.9272					73.4	-62.561
73.45	-59.5093						73.45	-62.8967					73.45	-63.4766
73.5	-62.2559						73.5	-62.8052					73.5	-62.2559
73.55	-63.4766						73.55	-62.5					73.55	-63.7817
73.6	-59.8145						73.6	-62.6221					73.6	-64.3921
73.65	-61.6455						73.65	-62.9272					73.65	-61.3403
73.7	-62.2559						73.7	-62.9883					73.7	-62.2559
73.75	-60.1196						73.75	-62.8357					73.75	-62.8662
73.8	-62.8662						73.8	-62.561					73.8	-62.2559
73.85	-59.5093						73.85	-62.6526					73.85	-64.0869
73.9	-60.4248						73.9	-63.0188					73.9	-60.4248
73.95	-61.0352						73.95	-62.9272					73.95	-62.561
74	-60.73						74	-62.8357					74	-62.8662
74.05	-60.4248						74.05	-62.6831					74.05	-60.1196
74.1	-59.2041						74.1	-62.6221					74.1	-62.561
74.15	-61.3403						74.15	-62.8967					74.15	-60.4248
74.2	-58.8989						74.2	-62.9883					74.2	-61.3403
74.25	-60.1196						74.25	-63.0188					74.25	-62.561
74.3	-57.373						74.3	-62.8967					74.3	-59.2041
74.35	-60.73						74.35	-62.6526					74.35	-61.6455
74.4	-58.2886						74.4	-62.8052					74.4	-62.2559
74.45	-60.1196						74.45	-63.0798					74.45	-58.5938
74.5	-57.6782						74.5	-63.1409					74.5	-61.6455
74.55	-59.8145						74.55	-63.1409					74.55	-60.4248
74.6	-58.8989						74.6	-62.8052					74.6	-58.8989
74.65	-57.0679						74.65	-62.7441					74.65	-60.4248
74.7	-58.8989						74.7	-62.9578					74.7	-57.9834
74.75	-56.7627						74.75	-63.1409					74.75	-59.5093
74.8	-58.5938						74.8	-63.0798					74.8	-60.73
74.85	-55.542						74.85	-63.1409					74.85	-57.0679
74.9	-58.2886						74.9	-62.9272					74.9	-59.2041
74.95	-56.1523						74.95	-62.7441					74.95	-59.8145
75	-59.2041						75	-62.9578					75	-57.373
75.05	-55.8472						75.05	-63.2629					75.05	-59.2041
75.1	-57.9834						75.1	-63.1714					75.1	-59.2041
75.15	-55.8472						75.15	-63.1409					75.15	-57.0679
75.2	-57.6782						75.2	-62.9578					75.2	-58.8989
75.25	-56.7627						75.25	-62.9883					75.25	-58.2886
75.3	-55.542						75.3	-62.8967					75.3	-56.4575
75.35	-55.542						75.35	-62.9272					75.35	-58.8989
75.4	-55.2368						75.4	-63.1714					75.4	-57.6782
75.45	-56.7627						75.45	-63.2019					75.45	-56.4575
75.5	-54.9316						75.5	-63.1409					75.5	-58.2886
75.55	-55.8472						75.55	-63.0493					75.55	-57.373
75.6	-55.2368						75.6	-62.8662					75.6	-55.8472
75.65	-56.7627						75.65	-62.8357					75.65	-57.373
75.7	-54.3213						75.7	-63.0798					75.7	-56.1523
75.75	-55.2368						75.75	-63.1714					75.75	-55.2368
75.8	-54.9316						75.8	-63.1103					75.8	-57.6782
75.85	-55.542						75.85	-63.2019					75.85	-57.0679
75.9	-54.3213						75.9	-63.2019					75.9	-55.542
75.95	-54.6265						75.95	-62.9578					75.95	-57.0679
76	-56.1523						76	-62.9272					76	-57.0679
76.05	-54.9316						76.05	-62.8662					76.05	-54.9316
76.1	-55.542						76.1	-63.0493					76.1	-56.1523
76.15	-53.4058						76.15	-63.1714					76.15	-56.1523
76.2	-56.7627						76.2	-63.2629					76.2	-54.0161
76.25	-53.7109						76.25	-63.2019					76.25	-56.1523
76.3	-56.1523						76.3	-63.1714					76.3	-55.542
76.35	-52.1851						76.35	-63.0493					76.35	-53.1006
76.4	-54.9316						76.4	-62.9883					76.4	-56.1523
76.45	-53.4058						76.45	-62.8967					76.45	-55.8472
76.5	-54.3213						76.5	-62.9883					76.5	-54.0161
76.55	-52.4902						76.55	-63.0493					76.55	-55.8472
76.6	-54.0161						76.6	-63.1409					76.6	-54.6265
76.65	-54.3213						76.65	-63.2629					76.65	-54.9316
76.7	-52.4902						76.7	-63.1409					76.7	-55.8472
76.75	-54.6265						76.75	-63.1103					76.75	-53.4058
76.8	-52.1851						76.8	-63.0493					76.8	-57.0679
76.85	-54.9316						76.85	-62.9883					76.85	-52.7954
76.9	-51.5747						76.9	-62.8967					76.9	-55.8472
76.95	-54.0161						76.95	-62.7747					76.95	-52.1851
77	-51.2695						77	-62.9272					77	-55.2368
77.05	-54.3213						77.05	-63.1714					77.05	-53.1006
77.1	-52.7954						77.1	-63.1714					77.1	-55.2368
77.15	-52.1851						77.15	-63.1714					77.15	-52.4902
77.2	-54.6265						77.2	-62.9578					77.2	-55.8472
77.25	-52.1851						77.25	-62.8662					77.25	-54.0161
77.3	-54.0161						77.3	-63.1409					77.3	-55.542
77.35	-50.9644						77.35	-63.1409					77.35	-53.1006
77.4	-53.7109						77.4	-62.9578					77.4	-55.542
77.45	-52.4902						77.45	-62.8052					77.45	-53.4058
77.5	-52.4902						77.5	-63.2019					77.5	-56.1523
77.55	-53.4058						77.55	-63.1714					77.55	-52.1851
77.6	-53.1006						77.6	-62.8052					77.6	-56.7627
77.65	-54.6265						77.65	-63.1409					77.65	-54.0161
77.7	-51.5747						77.7	-63.1714					77.7	-55.2368
77.75	-54.3213						77.75	-62.8357					77.75	-53.7109
77.8	-51.5747						77.8	-63.1409					77.8	-55.2368
77.85	-53.4058						77.85	-63.1103					77.85	-55.2368
77.9	-53.1006						77.9	-62.8357					77.9	-53.1006
77.95	-51.8799						77.95	-63.2324					77.95	-54.9316
78	-54.6265						78	-63.1103					78	-53.7109
78.05	-50.9644						78.05	-62.7747					78.05	-56.1523
78.1	-54.0161						78.1	-63.2935					78.1	-53.1006
78.15	-52.1851						78.15	-63.0188					78.15	-56.4575
78.2	-53.7109						78.2	-62.9883					78.2	-53.1006
78.25	-53.7109						78.25	-63.2019					78.25	-56.7627
78.3	-52.4902						78.3	-62.8967					78.3	-53.4058
78.35	-54.3213						78.35	-63.2324					78.35	-56.1523
78.4	-51.2695						78.4	-63.2324					78.4	-53.4058
78.45	-54.0161						78.45	-62.8052					78.45	-57.0679
78.5	-53.4058						78.5	-63.2935					78.5	-54.3213
78.55	-52.4902						78.55	-63.1714					78.55	-56.1523
78.6	-54.9316						78.6	-62.8662					78.6	-54.3213
78.65	-52.1851						78.65	-63.385					78.65	-56.1523
78.7	-54.3213						78.7	-63.2019					78.7	-54.3213
78.75	-53.7109						78.75	-62.9272					78.75	-56.4575
78.8	-53.1006						78.8	-63.2935					78.8	-54.0161
78.85	-55.542						78.85	-63.2019					78.85	-56.1523
78.9	-51.8799						78.9	-62.8967					78.9	-53.7109
78.95	-54.6265						78.95	-63.324					78.95	-55.8472
79	-53.7109						79	-63.1714					79	-54.6265
79.05	-54.6265						79.05	-62.9272					79.05	-55.542
79.1	-55.542						79.1	-63.2019					79.1	-54.9316
79.15	-51.8799						79.15	-63.2935					79.15	-54.9316
79.2	-54.3213						79.2	-62.9883					79.2	-57.0679
79.25	-55.542						79.25	-63.0493					79.25	-55.8472
79.3	-54.3213						79.3	-63.3545					79.3	-56.7627
79.35	-56.7627						79.35	-63.2935					79.35	-54.3213
79.4	-52.7954						79.4	-62.8662					79.4	-57.6782
79.45	-55.8472						79.45	-63.385					79.45	-54.6265
79.5	-57.0679						79.5	-63.324					79.5	-56.4575
79.55	-53.7109						79.55	-63.2019					79.55	-54.6265
79.6	-55.8472						79.6	-63.0493					79.6	-56.4575
79.65	-54.9316						79.65	-63.3545					79.65	-55.542
79.7	-56.1523						79.7	-63.2935					79.7	-56.1523
79.75	-57.373						79.75	-63.0188					79.75	-57.373
79.8	-54.3213						79.8	-63.2019					79.8	-55.542
79.85	-56.7627						79.85	-63.385					79.85	-58.2886
79.9	-57.0679						79.9	-63.324					79.9	-55.2368
79.95	-54.9316						79.95	-62.9578					79.95	-57.6782
80	-56.4575						80	-63.324					80	-54.9316
80.05	-56.4575						80.05	-63.2935					80.05	-57.6782
80.1	-55.8472						80.1	-63.2019					80.1	-57.9834
80.15	-57.9834						80.15	-63.0798					80.15	-57.373
80.2	-54.3213						80.2	-63.3545					80.2	-57.9834
80.25	-56.7627						80.25	-63.3545					80.25	-57.0679
80.3	-58.8989						80.3	-63.2324					80.3	-59.8145
80.35	-54.6265						80.35	-63.0188					80.35	-56.1523
80.4	-57.373						80.4	-63.385					80.4	-58.5938
80.45	-58.5938						80.45	-63.324					80.45	-57.6782
80.5	-56.1523						80.5	-63.2019					80.5	-58.8989
80.55	-57.373						80.55	-63.0188					80.55	-59.5093
80.6	-59.2041						80.6	-63.4155					80.6	-57.6782
80.65	-56.7627						80.65	-63.385					80.65	-60.73
80.7	-59.2041						80.7	-63.324					80.7	-58.2886
80.75	-57.9834						80.75	-63.1409					80.75	-59.5093
80.8	-57.0679						80.8	-63.385					80.8	-57.9834
80.85	-59.2041						80.85	-63.4155					80.85	-59.8145
80.9	-58.8989						80.9	-63.2935					80.9	-61.6455
80.95	-57.0679						80.95	-63.0798					80.95	-58.2886
81	-59.5093						81	-63.2324					81	-61.3403
81.05	-59.2041						81.05	-63.4155					81.05	-58.2886
81.1	-58.2886						81.1	-63.385					81.1	-61.3403
81.15	-59.8145						81.15	-63.2324					81.15	-60.4248
81.2	-59.8145						81.2	-63.1714					81.2	-59.8145
81.25	-58.5938						81.25	-63.385					81.25	-62.2559
81.3	-60.1196						81.3	-63.385					81.3	-59.5093
81.35	-60.1196						81.35	-63.385					81.35	-61.3403
81.4	-58.8989						81.4	-63.0493					81.4	-60.1196
81.45	-60.73						81.45	-63.324					81.45	-61.0352
81.5	-60.4248						81.5	-63.4766					81.5	-63.4766
81.55	-58.5938						81.55	-63.5071					81.55	-59.5093
81.6	-60.73						81.6	-63.324					81.6	-62.2559
81.65	-62.2559						81.65	-63.0798					81.65	-61.3403
81.7	-58.8989						81.7	-63.385					81.7	-62.561
81.75	-61.6455						81.75	-63.5376					81.75	-63.7817
81.8	-61.9507						81.8	-63.4766					81.8	-61.0352
81.85	-59.5093						81.85	-63.2935					81.85	-63.1714
81.9	-61.3403						81.9	-63.0188					81.9	-62.561
81.95	-61.6455						81.95	-63.5071					81.95	-61.3403
82	-59.8145						82	-63.5376					82	-64.6973
82.05	-63.1714						82.05	-63.4766					82.05	-61.9507
82.1	-60.73						82.1	-63.2629					82.1	-63.7817
82.15	-62.2559						82.15	-63.1409					82.15	-64.3921
82.2	-62.2559						82.2	-63.446					82.2	-62.561
82.25	-61.0352						82.25	-63.5681					82.25	-64.6973
82.3	-63.4766						82.3	-63.5071					82.3	-63.1714
82.35	-60.4248						82.35	-63.3545					82.35	-63.7817
82.4	-63.1714						82.4	-63.2019					82.4	-65.3076
82.45	-61.3403						82.45	-63.2935					82.45	-63.1714
82.5	-63.4766						82.5	-63.5376					82.5	-64.6973
82.55	-61.6455						82.55	-63.4766					82.55	-65.0024
82.6	-63.7817						82.6	-63.446					82.6	-62.8662
82.65	-61.0352						82.65	-63.1714					82.65	-65.3076
82.7	-64.3921						82.7	-63.1103					82.7	-62.8662
82.75	-61.6455						82.75	-63.4155					82.75	-64.0869
82.8	-64.0869						82.8	-63.5986					82.8	-66.2231
82.85	-61.3403						82.85	-63.3545					82.85	-64.3921
82.9	-65.0024						82.9	-63.385					82.9	-66.2231
82.95	-62.8662						82.95	-63.1103					82.95	-66.8335
83	-65.6128						83	-63.2324					83	-63.7817
83.05	-62.2559						83.05	-63.324					83.05	-66.5283
83.1	-65.918						83.1	-63.5071					83.1	-67.749
83.15	-64.0869						83.15	-63.446					83.15	-64.6973
83.2	-65.0024						83.2	-63.3545					83.2	-66.5283
83.25	-64.0869						83.25	-63.1714					83.25	-66.8335
83.3	-65.0024						83.3	-63.1103					83.3	-65.918
83.35	-65.918						83.35	-63.3545					83.35	-67.4438
83.4	-64.0869						83.4	-63.446					83.4	-66.2231
83.45	-65.6128						83.45	-63.385					83.45	-65.0024
83.5	-64.3921						83.5	-63.3545					83.5	-68.9697
83.55	-66.8335						83.55	-63.2935					83.55	-66.5283
83.6	-64.0869						83.6	-63.0798					83.6	-66.8335
83.65	-66.8335						83.65	-63.0798					83.65	-67.749
83.7	-64.6973						83.7	-63.2935					83.7	-67.1387
83.75	-67.4438						83.75	-63.4155					83.75	-67.1387
83.8	-64.6973						83.8	-63.385					83.8	-69.5801
83.85	-67.1387						83.85	-63.385					83.85	-66.2231
83.9	-65.3076						83.9	-63.2019					83.9	-68.3594
83.95	-68.3594						83.95	-63.1409					83.95	-70.4956
84	-64.3921						84	-62.9883					84	-67.4438
84.05	-67.4438						84.05	-63.2019					84.05	-68.0542
84.1	-65.6128						84.1	-63.324					84.1	-70.8008
84.15	-68.9697						84.15	-63.324					84.15	-68.6646
84.2	-65.3076						84.2	-63.324					84.2	-67.749
84.25	-67.4438						84.25	-63.3545					84.25	-70.4956
84.3	-65.918						84.3	-63.1409					84.3	-69.5801
84.35	-68.0542						84.35	-63.0188					84.35	-69.2749
84.4	-67.1387						84.4	-62.9883					84.4	-70.4956
84.45	-67.4438						84.45	-63.0798					84.45	-70.1904
84.5	-68.3594						84.5	-63.2935					84.5	-68.6646
84.55	-67.749						84.55	-63.2324					84.55	-71.106
84.6	-68.9697						84.6	-63.324					84.6	-70.8008
84.65	-66.8335						84.65	-63.2935					84.65	-68.3594
84.7	-69.8853						84.7	-63.2019					84.7	-71.106
84.75	-66.5283						84.75	-63.0493					84.75	-71.7163
84.8	-68.6646						84.8	-63.0188					84.8	-68.9697
84.85	-67.4438						84.85	-62.9883					84.85	-71.7163
84.9	-69.5801						84.9	-63.0188					84.9	-71.4111
84.95	-68.6646						84.95	-63.2019					84.95	-70.8008
85	-67.4438						85	-63.3545					85	-71.4111
85.05	-70.4956						85.05	-63.2324					85.05	-70.1904
85.1	-68.3594						85.1	-63.2324					85.1	-72.3267
85.15	-70.8008						85.15	-63.1714					85.15	-71.106
85.2	-67.4438						85.2	-63.2019					85.2	-72.0215
85.25	-69.2749						85.25	-63.1714					85.25	-72.0215
85.3	-69.2749						85.3	-62.9883					85.3	-71.4111
85.35	-69.8853						85.35	-62.9578					85.35	-72.6318
85.4	-70.8008						85.4	-63.2324					85.4	-71.4111
85.45	-68.6646						85.45	-63.3545					85.45	-73.2422
85.5	-71.7163						85.5	-63.2324					85.5	-72.0215
85.55	-68.0542						85.55	-63.1103					85.55	-73.5474
85.6	-70.8008						85.6	-62.9272					85.6	-72.0215
85.65	-68.6646						85.65	-63.324					85.65	-73.2422
85.7	-70.8008						85.7	-63.2629					85.7	-72.3267
85.75	-70.4956						85.75	-63.1409					85.75	-73.5474
85.8	-69.8853						85.8	-62.9578					85.8	-72.6318
85.85	-71.4111						85.85	-63.3545					85.85	-72.3267
85.9	-69.2749						85.9	-63.2324					85.9	-73.2422
85.95	-70.8008						85.95	-62.8967					85.95	-72.3267
86	-69.2749						86	-63.2935					86	-73.5474
86.05	-70.4956						86.05	-63.324					86.05	-71.4111
86.1	-72.0215						86.1	-62.9578					86.1	-74.4629
86.15	-69.8853						86.15	-63.3545					86.15	-71.106
86.2	-72.3267						86.2	-63.385					86.2	-75.0732
86.25	-68.6646						86.25	-63.0188					86.25	-70.8008
86.3	-72.0215						86.3	-63.2935					86.3	-75.6836
86.35	-71.4111						86.35	-63.3545					86.35	-72.6318
86.4	-71.4111						86.4	-63.0188					86.4	-74.7681
86.45	-72.3267						86.45	-63.446					86.45	-73.2422
86.5	-69.2749						86.5	-63.0798					86.5	-74.4629
86.55	-72.0215						86.55	-63.0798					86.55	-74.1577
86.6	-70.8008						86.6	-63.324					86.6	-74.7681
86.65	-71.106						86.65	-62.8967					86.65	-73.8525
86.7	-72.3267						86.7	-63.2019					86.7	-74.4629
86.75	-71.4111						86.75	-63.2935					86.75	-74.1577
86.8	-73.5474						86.8	-62.8357					86.8	-74.7681
86.85	-70.1904						86.85	-63.324					86.85	-73.8525
86.9	-71.7163						86.9	-63.2324					86.9	-75.3784
86.95	-73.5474						86.95	-62.8357					86.95	-74.4629
87	-70.8008						87	-63.385					87	-76.2939
87.05	-72.937						87.05	-63.1409					87.05	-73.2422
87.1	-70.1904						87.1	-62.9272					87.1	-76.2939
87.15	-72.3267						87.15	-63.2324					87.15	-73.8525
87.2	-73.2422						87.2	-63.1409					87.2	-76.5991
87.25	-70.1904						87.25	-62.8052					87.25	-73.2422
87.3	-72.937						87.3	-63.2019					87.3	-75.6836
87.35	-72.0215						87.35	-63.1714					87.35	-74.4629
87.4	-72.3267						87.4	-62.8662					87.4	-75.9888
87.45	-73.8525						87.45	-63.1409					87.45	-73.8525
87.5	-70.4956						87.5	-63.2019					87.5	-74.7681
87.55	-73.8525						87.55	-63.0493					87.55	-76.2939
87.6	-73.2422						87.6	-62.8662					87.6	-75.3784
87.65	-71.4111						87.65	-63.2324					87.65	-76.5991
87.7	-73.5474						87.7	-63.1409					87.7	-73.8525
87.75	-72.6318						87.75	-62.7747					87.75	-77.5146
87.8	-73.2422						87.8	-63.0493					87.8	-74.7681
87.85	-74.4629						87.85	-63.1714					87.85	-75.9888
87.9	-71.7163						87.9	-63.0188					87.9	-74.7681
87.95	-73.8525						87.95	-62.8662					87.95	-75.9888
88	-73.5474						88	-63.1409					88	-77.5146
88.05	-71.106						88.05	-63.1714					88.05	-75.0732
88.1	-73.5474						88.1	-63.0188					88.1	-77.2095
88.15	-72.937						88.15	-62.9578					88.15	-74.1577
88.2	-72.937						88.2	-63.1409					88.2	-77.5146
88.25	-73.8525						88.25	-63.0798					88.25	-74.1577
88.3	-71.106						88.3	-62.8052					88.3	-76.5991
88.35	-72.6318						88.35	-62.9883					88.35	-76.5991
88.4	-75.0732						88.4	-63.1409					88.4	-75.6836
88.45	-70.8008						88.45	-63.0798					88.45	-76.9043
88.5	-73.5474						88.5	-62.7136					88.5	-74.4629
88.55	-73.5474						88.55	-62.9578					88.55	-77.2095
88.6	-71.7163						88.6	-63.1103					88.6	-74.4629
88.65	-73.2422						88.65	-63.0493					88.65	-75.9888
88.7	-73.8525						88.7	-62.6221					88.7	-75.6836
88.75	-72.0215						88.75	-63.0188					88.75	-75.6836
88.8	-74.1577						88.8	-63.1103					88.8	-77.2095
88.85	-73.2422						88.85	-63.0188					88.85	-74.7681
88.9	-72.0215						88.9	-62.7441					88.9	-76.5991
88.95	-73.5474						88.95	-62.9883					88.95	-74.7681
89	-73.5474						89	-63.1103					89	-76.5991
89.05	-72.0215						89.05	-63.0493					89.05	-75.9888
89.1	-72.6318						89.1	-62.8052					89.1	-75.0732
89.15	-74.7681						89.15	-62.8052					89.15	-77.5146
89.2	-71.106						89.2	-63.0798					89.2	-73.8525
89.25	-73.5474						89.25	-63.1103					89.25	-76.2939
89.3	-72.6318						89.3	-62.9272					89.3	-74.1577
89.35	-71.106						89.35	-62.7441					89.35	-75.3784
89.4	-73.2422						89.4	-63.0798					89.4	-76.5991
89.45	-73.2422						89.45	-63.1103					89.45	-73.8525
89.5	-71.106						89.5	-63.0798					89.5	-75.9888
89.55	-72.6318						89.55	-62.6831					89.55	-74.1577
89.6	-73.5474						89.6	-62.9883					89.6	-74.7681
89.65	-70.8008						89.65	-63.1409					89.65	-75.9888
89.7	-72.0215						89.7	-63.1714					89.7	-73.5474
89.75	-73.5474						89.75	-62.8357					89.75	-75.9888
89.8	-70.8008						89.8	-62.8662					89.8	-73.2422
89.85	-71.7163						89.85	-63.1409					89.85	-75.6836
89.9	-73.5474						89.9	-63.1714					89.9	-75.3784
89.95	-70.1904						89.95	-63.0493					89.95	-73.5474
90	-71.7163						90	-62.8052					90	-75.6836
90.05	-73.5474						90.05	-62.9272					90.05	-73.5474
90.1	-70.4956						90.1	-63.1714					90.1	-74.1577
90.15	-69.8853						90.15	-63.1103					90.15	-75.6836
90.2	-72.6318						90.2	-63.0188					90.2	-73.2422
90.25	-70.1904						90.25	-62.8052					90.25	-75.3784
90.3	-70.1904						90.3	-62.9578					90.3	-74.1577
90.35	-72.3267						90.35	-63.2324					90.35	-73.5474
90.4	-70.1904						90.4	-63.1409					90.4	-76.2939
90.45	-70.8008						90.45	-63.1103					90.45	-72.6318
90.5	-71.106						90.5	-62.8967					90.5	-74.4629
90.55	-69.5801						90.55	-62.9578					90.55	-74.1577
90.6	-72.3267						90.6	-63.2019					90.6	-73.2422
90.65	-69.2749						90.65	-63.1714					90.65	-74.7681
90.7	-71.7163						90.7	-63.2324					90.7	-72.937
90.75	-68.3594						90.75	-63.0798					90.75	-72.937
90.8	-71.4111						90.8	-62.8967					90.8	-74.7681
90.85	-68.9697						90.85	-63.1714					90.85	-71.7163
90.9	-70.4956						90.9	-63.324					90.9	-73.2422
90.95	-68.6646						90.95	-63.2935					90.95	-72.937
91	-70.8008						91	-63.1409					91	-71.4111
91.05	-68.6646						91.05	-62.9272					91.05	-73.2422
91.1	-69.8853						91.1	-63.1103					91.1	-72.937
91.15	-67.749						91.15	-63.3545					91.15	-71.106
91.2	-69.8853						91.2	-63.385					91.2	-73.8525
91.25	-67.4438						91.25	-63.3545					91.25	-71.4111
91.3	-69.8853						91.3	-63.2629					91.3	-71.4111
91.35	-67.4438						91.35	-63.1103					91.35	-72.6318
91.4	-69.8853						91.4	-63.0493					91.4	-70.1904
91.45	-68.3594						91.45	-63.324					91.45	-72.0215
91.5	-70.4956						91.5	-63.446					91.5	-72.6318
91.55	-67.1387						91.55	-63.4155					91.55	-68.6646
91.6	-69.5801						91.6	-63.324					91.6	-71.7163
91.65	-67.4438						91.65	-63.0798					91.65	-72.3267
91.7	-68.6646						91.7	-63.1409					91.7	-68.6646
91.75	-68.3594						91.75	-63.324					91.75	-70.8008
91.8	-68.6646						91.8	-63.4155					91.8	-70.8008
91.85	-68.6646						91.85	-63.5071					91.85	-68.6646
91.9	-65.918						91.9	-63.4766					91.9	-70.8008
91.95	-68.0542						91.95	-63.385					91.95	-69.8853
92	-66.2231						92	-63.1103					92	-69.2749
92.05	-68.0542						92.05	-63.1103					92.05	-70.4956
92.1	-64.6973						92.1	-63.446					92.1	-69.5801
92.15	-67.749						92.15	-63.5681					92.15	-68.0542
92.2	-65.0024						92.2	-63.5376					92.2	-69.8853
92.25	-67.1387						92.25	-63.5071					92.25	-69.5801
92.3	-64.3921						92.3	-63.446					92.3	-66.2231
92.35	-66.8335						92.35	-63.324					92.35	-69.5801
92.4	-65.0024						92.4	-63.1409					92.4	-69.2749
92.45	-66.8335						92.45	-63.2935					92.45	-67.4438
92.5	-65.3076						92.5	-63.5376					92.5	-68.3594
92.55	-65.6128						92.55	-63.6291					92.55	-69.2749
92.6	-66.2231						92.6	-63.5376					92.6	-66.5283
92.65	-65.0024						92.65	-63.4766					92.65	-67.749
92.7	-66.2231						92.7	-63.4766					92.7	-68.6646
92.75	-64.0869						92.75	-63.3545					92.75	-65.3076
92.8	-67.1387						92.8	-63.2019					92.8	-68.0542
92.85	-63.4766						92.85	-63.324					92.85	-68.9697
92.9	-66.2231						92.9	-63.5071					92.9	-65.6128
92.95	-62.561						92.95	-63.6902					92.95	-66.5283
93	-66.2231						93	-63.5986					93	-68.9697
93.05	-62.2559						93.05	-63.5986					93.05	-65.0024
93.1	-65.0024						93.1	-63.5681					93.1	-65.6128
93.15	-63.4766						93.15	-63.5376					93.15	-67.4438
93.2	-64.0869						93.2	-63.3545					93.2	-64.6973
93.25	-64.6973						93.25	-63.3545					93.25	-65.918
93.3	-62.2559						93.3	-63.2629					93.3	-66.8335
93.35	-64.3921						93.35	-63.4155					93.35	-63.7817
93.4	-61.0352						93.4	-63.5071					93.4	-66.5283
93.45	-63.1714						93.45	-63.6291					93.45	-62.561
93.5	-60.73						93.5	-63.6902					93.5	-65.6128
93.55	-62.2559						93.55	-63.6597					93.55	-62.561
93.6	-62.2559						93.6	-63.5986					93.6	-64.3921
93.65	-61.3403						93.65	-63.446					93.65	-62.8662
93.7	-63.1714						93.7	-63.324					93.7	-63.7817
93.75	-59.8145						93.75	-63.2324					93.75	-62.561
93.8	-61.9507						93.8	-63.5681					93.8	-62.8662
93.85	-59.2041						93.85	-63.5986					93.85	-62.2559
93.9	-61.0352						93.9	-63.5681					93.9	-62.8662
93.95	-59.8145						93.95	-63.385					93.95	-61.9507
94	-59.5093						94	-63.3545					94	-62.561
94.05	-60.73						94.05	-63.6291					94.05	-61.3403
94.1	-58.2886						94.1	-63.5986					94.1	-62.2559
94.15	-60.4248						94.15	-63.2629					94.15	-58.8989
94.2	-56.4575						94.2	-63.5376					94.2	-61.6455
94.25	-60.1196						94.25	-63.5986					94.25	-59.5093
94.3	-57.9834						94.3	-63.4766					94.3	-61.9507
94.35	-58.5938						94.35	-63.3545					94.35	-58.8989
94.4	-58.8989						94.4	-63.6902					94.4	-61.0352
94.45	-58.2886						94.45	-63.4766					94.45	-59.5093
94.5	-59.5093						94.5	-63.4155					94.5	-61.0352
94.55	-55.8472						94.55	-63.6597					94.55	-59.2041
94.6	-57.6782						94.6	-63.4155					94.6	-58.8989
94.65	-57.0679						94.65	-63.5071					94.65	-59.5093
94.7	-57.0679						94.7	-63.6902					94.7	-57.9834
94.75	-58.2886						94.75	-63.3545					94.75	-59.8145
94.8	-55.542						94.8	-63.7207					94.8	-57.0679
94.85	-57.6782						94.85	-63.6902					94.85	-59.2041
94.9	-55.542						94.9	-63.3545					94.9	-56.4575
94.95	-56.4575						94.95	-63.7512					94.95	-58.5938
95	-56.4575						95	-63.5376					95	-55.8472
95.05	-55.542						95.05	-63.5071					95.05	-59.2041
95.1	-57.373						95.1	-63.6902					95.1	-55.8472
95.15	-53.7109						95.15	-63.5986					95.15	-57.9834
95.2	-54.9316						95.2	-63.6597					95.2	-54.9316
95.25	-55.542						95.25	-63.6902					95.25	-58.2886
95.3	-54.9316						95.3	-63.4766					95.3	-55.2368
95.35	-56.1523						95.35	-63.6902					95.35	-56.7627
95.4	-53.1006						95.4	-63.6597					95.4	-54.3213
95.45	-54.6265						95.45	-63.5071					95.45	-56.7627
95.5	-55.2368						95.5	-63.5986					95.5	-53.7109
95.55	-53.1006						95.55	-63.8123					95.55	-55.2368
95.6	-55.542						95.6	-63.6902					95.6	-54.0161
95.65	-51.8799						95.65	-63.5376					95.65	-55.2368
95.7	-54.3213						95.7	-63.8733					95.7	-55.8472
95.75	-54.0161						95.75	-63.7817					95.75	-53.4058
95.8	-52.4902						95.8	-63.446					95.8	-54.9316
95.85	-54.6265						95.85	-63.9343					95.85	-52.7954
95.9	-52.1851						95.9	-63.8733					95.9	-55.542
95.95	-51.5747						95.95	-63.7207					95.95	-51.8799
96	-54.0161						96	-63.8123					96	-54.3213
96.05	-50.9644						96.05	-64.0259					96.05	-51.2695
96.1	-53.1006						96.1	-63.8123					96.1	-53.1006
96.15	-51.8799						96.15	-63.6902					96.15	-50.6592
96.2	-50.9644						96.2	-64.0564					96.2	-51.8799
96.25	-53.7109						96.25	-63.9038					96.25	-52.1851
96.3	-49.4385						96.3	-63.7817					96.3	-51.5747
96.35	-51.2695						96.35	-63.7512					96.35	-52.1851
96.4	-51.8799						96.4	-64.1174					96.4	-50.0488
96.45	-49.4385						96.45	-63.9954					96.45	-52.4902
96.5	-51.5747						96.5	-63.8123					96.5	-49.4385
96.55	-50.0488						96.55	-63.9648					96.55	-52.1851
96.6	-50.0488						96.6	-64.1479					96.6	-49.1333
96.65	-52.1851						96.65	-63.9954					96.65	-50.6592
96.7	-49.1333						96.7	-63.7207					96.7	-49.1333
96.75	-50.0488						96.75	-63.9954					96.75	-49.4385
96.8	-50.6592						96.8	-64.1479					96.8	-50.354
96.85	-48.5229						96.85	-64.0259					96.85	-49.1333
96.9	-49.7437						96.9	-63.7207					96.9	-51.8799
96.95	-50.6592						96.95	-64.0259					96.95	-48.2178
97	-47.6074						97	-64.1785					97	-50.0488
97.05	-50.354						97.05	-64.0869					97.05	-46.6919
97.1	-49.7437						97.1	-63.7512					97.1	-50.354
97.15	-47.9126						97.15	-64.0869					97.15	-49.1333
97.2	-49.4385						97.2	-64.1479					97.2	-47.9126
97.25	-48.8281						97.25	-64.0869					97.25	-49.4385
97.3	-48.2178						97.3	-63.8428					97.3	-47.3022
97.35	-50.6592						97.35	-63.9648					97.35	-49.7437
97.4	-47.6074						97.4	-64.209					97.4	-46.6919
97.45	-48.2178						97.45	-64.209					97.45	-48.2178
97.5	-50.6592						97.5	-63.9954					97.5	-48.2178
97.55	-46.9971						97.55	-63.9343					97.55	-47.3022
97.6	-47.6074						97.6	-64.2395					97.6	-48.8281
97.65	-49.1333						97.65	-64.3005					97.65	-45.166
97.7	-47.6074						97.7	-64.1479					97.7	-49.1333
97.75	-48.2178						97.75	-63.9038					97.75	-45.4712
97.8	-50.354						97.8	-64.209					97.8	-47.6074
97.85	-46.6919						97.85	-64.3616					97.85	-46.6919
97.9	-48.5229						97.9	-64.209					97.9	-47.9126
97.95	-50.0488						97.95	-64.0259					97.95	-48.8281
98	-47.6074						98	-63.9954					98	-46.3867
98.05	-47.6074						98.05	-64.331					98.05	-47.6074
98.1	-50.354						98.1	-64.27					98.1	-46.0815
98.15	-48.2178						98.15	-64.209					98.15	-46.9971
98.2	-48.5229						98.2	-64.1174					98.2	-47.6074
98.25	-49.7437						98.25	-64.0564					98.25	-45.166
98.3	-50.0488						98.3	-64.3005					98.3	-48.5229
98.35	-48.2178						98.35	-64.2395					98.35	-46.6919
98.4	-50.6592						98.4	-64.331					98.4	-47.3022
98.45	-49.1333						98.45	-64.0259					98.45	-48.2178
98.5	-49.4385						98.5	-64.1785					98.5	-46.0815
98.55	-51.8799						98.55	-64.3921					98.55	-49.4385
98.6	-48.8281						98.6	-64.4226					98.6	-46.9971
98.65	-48.5229						98.65	-64.2395					98.65	-47.9126
98.7	-52.7954						98.7	-64.1479					98.7	-49.1333
98.75	-48.8281						98.75	-64.0564					98.75	-46.9971
98.8	-51.2695						98.8	-64.4836					98.8	-49.4385
98.85	-49.1333						98.85	-64.3616					98.85	-47.9126
98.9	-50.9644						98.9	-64.331					98.9	-48.2178
98.95	-51.8799						98.95	-64.0564					98.95	-50.6592
99	-50.354						99	-64.0259					99	-46.9971
99.05	-51.5747						99.05	-64.27					99.05	-49.4385
99.1	-50.9644						99.1	-64.3921					99.1	-50.354
99.15	-53.7109						99.15	-64.3616					99.15	-48.8281
99.2	-50.6592						99.2	-64.209					99.2	-51.2695
99.25	-52.4902						99.25	-63.9343					99.25	-49.1333
99.3	-52.1851						99.3	-64.0564					99.3	-51.2695
99.35	-54.3213						99.35	-64.3005					99.35	-52.1851
99.4	-50.9644						99.4	-64.3616					99.4	-49.1333
99.45	-53.4058						99.45	-64.2395					99.45	-50.9644
99.5	-52.7954						99.5	-64.0564					99.5	-52.4902
99.55	-55.2368						99.55	-63.9343					99.55	-50.0488
99.6	-52.1851						99.6	-64.1174					99.6	-53.1006
99.65	-54.0161						99.65	-64.3005					99.65	-51.2695
99.7	-54.0161						99.7	-64.2395					99.7	-52.4902
99.75	-54.9316						99.75	-64.1785					99.75	-54.6265
99.8	-54.3213						99.8	-64.0869					99.8	-51.5747
99.85	-53.4058						99.85	-64.0259					99.85	-53.1006
[truncated: 63,536 more rows]

## Sheet: Fig. 1 sppl Sb
	24							8					60							10
t(ms)	500nm/100Hz						t(ms)	900nm				t(ms)	880nm						t(ms)	1micro
0	-63.8123						0	-65.3992				0	-66.8335						0	-62.5915
0.05	-63.6902						0.05	-65.5212				0.05	-65.0024						0.05	-63.0188
0.1	-63.5681						0.1	-65.7654				0.1	-67.1387						0.1	-62.9272
0.15	-63.5071						0.15	-65.7959				0.15	-65.3076						0.15	-62.7136
0.2	-63.4155						0.2	-65.7349				0.2	-68.6646						0.2	-62.5915
0.25	-63.4766						0.25	-65.6433				0.25	-65.918						0.25	-62.8967
0.3	-63.7207						0.3	-65.6128				0.3	-68.3594						0.3	-62.8357
0.35	-63.7207						0.35	-65.4602				0.35	-66.2231						0.35	-62.4084
0.4	-63.6597						0.4	-65.7043				0.4	-66.8335						0.4	-62.6221
0.45	-63.6597						0.45	-65.8569				0.45	-66.5283						0.45	-62.7441
0.5	-63.446						0.5	-65.918				0.5	-66.2231						0.5	-62.6221
0.55	-63.385						0.55	-65.7043				0.55	-67.749						0.55	-62.3474
0.6	-63.4155						0.6	-65.7959				0.6	-65.918						0.6	-62.5305
0.65	-63.5681						0.65	-65.6433				0.65	-67.1387						0.65	-62.6221
0.7	-63.6902						0.7	-65.5518				0.7	-65.6128						0.7	-62.4695
0.75	-63.6902						0.75	-65.5518				0.75	-68.0542						0.75	-62.1948
0.8	-63.5681						0.8	-65.7654				0.8	-65.3076						0.8	-62.439
0.85	-63.4766						0.85	-65.8569				0.85	-67.749						0.85	-62.5305
0.9	-63.385						0.9	-65.7959				0.9	-65.3076						0.9	-62.439
0.95	-63.2935						0.95	-65.7959				0.95	-67.749						0.95	-62.1643
1	-63.3545						1	-65.7654				1	-65.6128						1	-62.3474
1.05	-63.5071						1.05	-65.5518				1.05	-67.749						1.05	-62.3779
1.1	-63.5986						1.1	-65.4907				1.1	-67.1387						1.1	-62.2559
1.15	-63.6902						1.15	-65.5823				1.15	-67.749						1.15	-62.0117
1.2	-63.5681						1.2	-65.7349				1.2	-65.918						1.2	-62.1948
1.25	-63.5986						1.25	-65.8264				1.25	-67.1387						1.25	-62.2559
1.3	-63.446						1.3	-65.7959				1.3	-67.4438						1.3	-62.2559
1.35	-63.324						1.35	-65.7959				1.35	-66.5283						1.35	-62.0422
1.4	-63.1714						1.4	-65.6433				1.4	-67.749						1.4	-62.0422
1.45	-63.2324						1.45	-65.6738				1.45	-66.2231						1.45	-62.2559
1.5	-63.385						1.5	-65.5212				1.5	-68.3594						1.5	-62.1643
1.55	-63.5376						1.55	-65.3992				1.55	-67.1387						1.55	-61.9202
1.6	-63.5681						1.6	-65.4297				1.6	-68.0542						1.6	-61.8591
1.65	-63.5681						1.65	-65.6128				1.65	-65.6128						1.65	-62.0728
1.7	-63.4766						1.7	-65.7349				1.7	-68.6646						1.7	-62.1643
1.75	-63.5071						1.75	-65.7654				1.75	-65.3076						1.75	-62.0728
1.8	-63.446						1.8	-65.7043				1.8	-68.0542						1.8	-61.7065
1.85	-63.4155						1.85	-65.7043				1.85	-65.918						1.85	-61.8896
1.9	-63.2019						1.9	-65.7349				1.9	-68.0542						1.9	-62.1033
1.95	-63.1103						1.95	-65.5823				1.95	-65.918						1.95	-61.9812
2	-63.324						2	-65.4602				2	-67.749						2	-61.8286
2.05	-63.4766						2.05	-65.3381				2.05	-67.1387						2.05	-61.5845
2.1	-63.5071						2.1	-65.3381				2.1	-67.749						2.1	-61.8896
2.15	-63.385						2.15	-65.3992				2.15	-67.4438						2.15	-61.9812
2.2	-63.2935						2.2	-65.4907				2.2	-66.5283						2.2	-61.8896
2.25	-63.1409						2.25	-65.7349				2.25	-68.6646						2.25	-61.615
2.3	-63.4155						2.3	-65.6738				2.3	-65.3076						2.3	-61.554
2.35	-63.446						2.35	-65.6433				2.35	-68.6646						2.35	-61.8286
2.4	-63.5071						2.4	-65.6128				2.4	-65.3076						2.4	-61.8591
2.45	-63.0798						2.45	-65.5518				2.45	-67.1387						2.45	-61.7371
2.5	-63.4155						2.5	-65.6433				2.5	-65.3076						2.5	-61.676
2.55	-63.4766						2.55	-65.5518				2.55	-67.749						2.55	-61.4929
2.6	-63.385						2.6	-65.5212				2.6	-67.749						2.6	-61.676
2.65	-63.2935						2.65	-65.4602				2.65	-66.8335						2.65	-61.8286
2.7	-63.5071						2.7	-65.4297				2.7	-67.1387						2.7	-61.8286
2.75	-63.324						2.75	-65.1855				2.75	-66.5283						2.75	-61.6455
2.8	-63.324						2.8	-65.2466				2.8	-68.3594						2.8	-61.3098
2.85	-63.5681						2.85	-65.3686				2.85	-65.6128						2.85	-61.5845
2.9	-63.2324						2.9	-65.3686				2.9	-68.0542						2.9	-61.7676
2.95	-63.2935						2.95	-65.4907				2.95	-66.8335						2.95	-61.7065
3	-63.5071						3	-65.5212				3	-68.0542						3	-61.5845
3.05	-63.1409						3.05	-65.5823				3.05	-66.5283						3.05	-61.4319
3.1	-63.4155						3.1	-65.5518				3.1	-66.2231						3.1	-61.4624
3.15	-63.4766						3.15	-65.4907				3.15	-68.9697						3.15	-61.7065
3.2	-63.0493						3.2	-65.4297				3.2	-66.2231						3.2	-61.7065
3.25	-63.5376						3.25	-65.2466				3.25	-68.9697						3.25	-61.676
3.3	-63.3545						3.3	-65.155				3.3	-65.6128						3.3	-61.615
3.35	-63.1103						3.35	-65.2771				3.35	-67.749						3.35	-61.4624
3.4	-63.4766						3.4	-65.4907				3.4	-66.5283						3.4	-61.4014
3.45	-63.324						3.45	-65.4297				3.45	-66.8335						3.45	-61.676
3.5	-63.2629						3.5	-65.2771				3.5	-68.3594						3.5	-61.7065
3.55	-63.4155						3.55	-65.033				3.55	-66.2231						3.55	-61.676
3.6	-63.1714						3.6	-65.3381				3.6	-68.9697						3.6	-61.4929
3.65	-63.385						3.65	-65.4297				3.65	-65.918						3.65	-61.3708
3.7	-63.4155						3.7	-65.3686				3.7	-68.3594						3.7	-61.3403
3.75	-63.0493						3.75	-65.033				3.75	-68.0542						3.75	-61.5234
3.8	-63.4155						3.8	-65.4297				3.8	-67.4438						3.8	-61.676
3.85	-63.4155						3.85	-65.3992				3.85	-68.6646						3.85	-61.554
3.9	-63.1409						3.9	-65.033				3.9	-65.6128						3.9	-61.5845
3.95	-63.2629						3.95	-65.3992				3.95	-68.3594						3.95	-61.4319
4	-63.446						4	-65.4297				4	-66.5283						4	-61.1877
4.05	-63.2629						4.05	-65.1245				4.05	-67.4438						4.05	-61.4014
4.1	-63.0493						4.1	-65.3992				4.1	-68.9697						4.1	-61.6455
4.15	-63.4155						4.15	-65.3992				4.15	-66.5283						4.15	-61.676
4.2	-63.324						4.2	-65.033				4.2	-68.6646						4.2	-61.615
4.25	-63.0493						4.25	-65.3381				4.25	-65.3076						4.25	-61.4929
4.3	-63.324						4.3	-65.3381				4.3	-68.0542						4.3	-61.4624
4.35	-63.3545						4.35	-64.9414				4.35	-68.3594						4.35	-61.2793
4.4	-63.2324						4.4	-65.3076				4.4	-66.5283						4.4	-61.3403
4.45	-63.0798						4.45	-65.3992				4.45	-68.9697						4.45	-61.554
4.5	-63.446						4.5	-65.0635				4.5	-65.6128						4.5	-61.7065
4.55	-63.2629						4.55	-65.3381				4.55	-67.4438						4.55	-61.7065
4.6	-62.9883						4.6	-65.2771				4.6	-68.3594						4.6	-61.615
4.65	-63.2324						4.65	-65.1245				4.65	-65.918						4.65	-61.554
4.7	-63.385						4.7	-65.2466				4.7	-68.3594						4.7	-61.4929
4.75	-63.1103						4.75	-65.3381				4.75	-66.5283						4.75	-61.2793
4.8	-62.9272						4.8	-65.1245				4.8	-66.8335						4.8	-61.4319
4.85	-63.2324						4.85	-65.094				4.85	-68.9697						4.85	-61.6455
4.9	-63.2324						4.9	-65.3686				4.9	-65.918						4.9	-61.7065
4.95	-63.1103						4.95	-65.3686				4.95	-68.0542						4.95	-61.7981
5	-62.8967						5	-64.8804				5	-66.2231						5	-61.7371
5.05	-63.2629						5.05	-65.2161				5.05	-67.1387						5.05	-61.7371
5.1	-63.2629						5.1	-65.3076				5.1	-68.3594						5.1	-61.5845
5.15	-62.9883						5.15	-65.1855				5.15	-65.918						5.15	-61.4929
5.2	-62.8967						5.2	-64.9109				5.2	-67.1387						5.2	-61.4624
5.25	-63.2324						5.25	-65.3076				5.25	-68.3594						5.25	-61.5234
5.3	-63.1714						5.3	-65.2771				5.3	-65.918						5.3	-61.676
5.35	-63.0188						5.35	-65.1855				5.35	-68.0542						5.35	-61.8591
5.4	-62.8967						5.4	-65.0024				5.4	-66.5283						5.4	-61.9202
5.45	-63.2324						5.45	-65.3076				5.45	-67.1387						5.45	-61.7981
5.5	-63.2019						5.5	-65.2771				5.5	-68.6646						5.5	-61.8286
5.55	-62.9578						5.55	-65.2161				5.55	-65.6128						5.55	-61.8896
5.6	-62.8357						5.6	-65.033				5.6	-67.4438						5.6	-61.7981
5.65	-63.2019						5.65	-65.2771				5.65	-68.0542						5.65	-61.676
5.7	-63.1409						5.7	-65.3076				5.7	-66.2231						5.7	-61.5845
5.75	-63.0798						5.75	-65.155				5.75	-68.0542						5.75	-61.6455
5.8	-62.7747						5.8	-64.9414				5.8	-68.0542						5.8	-61.676
5.85	-63.1714						5.85	-65.2771				5.85	-66.2231						5.85	-61.8896
5.9	-63.2629						5.9	-65.3381				5.9	-68.3594						5.9	-61.9507
5.95	-63.0798						5.95	-65.3381				5.95	-65.6128						5.95	-62.0422
6	-62.7747						6	-65.033				6	-67.4438						6	-62.0117
6.05	-63.0798						6.05	-65.1855				6.05	-69.8853						6.05	-61.9812
6.1	-63.1714						6.1	-65.4297				6.1	-65.918						6.1	-61.8896
6.15	-63.1103						6.15	-65.3686				6.15	-66.8335						6.15	-61.9812
6.2	-62.9578						6.2	-65.1855				6.2	-68.6646						6.2	-61.8591
6.25	-62.9883						6.25	-65.0635				6.25	-65.6128						6.25	-61.7981
6.3	-63.2019						6.3	-65.4602				6.3	-68.0542						6.3	-61.615
6.35	-63.1409						6.35	-65.4602				6.35	-68.3594						6.35	-61.8591
6.4	-63.1103						6.4	-65.2771				6.4	-66.8335						6.4	-62.0117
6.45	-62.8357						6.45	-65.1245				6.45	-68.0542						6.45	-62.0728
6.5	-63.0493						6.5	-65.2466				6.5	-68.3594						6.5	-61.9202
6.55	-63.2935						6.55	-65.4602				6.55	-65.0024						6.55	-62.0728
6.6	-63.1714						6.6	-65.3992				6.6	-68.3594						6.6	-61.676
6.65	-63.1714						6.65	-65.3381				6.65	-68.6646						6.65	-61.9202
6.7	-62.8662						6.7	-65.1855				6.7	-65.6128						6.7	-62.0728
6.75	-63.1409						6.75	-65.3686				6.75	-68.0542						6.75	-62.0728
6.8	-63.2324						6.8	-65.5212				6.8	-68.6646						6.8	-61.7981
6.85	-63.2324						6.85	-65.4907				6.85	-66.2231						6.85	-61.8896
6.9	-63.1103						6.9	-65.3686				6.9	-67.4438						6.9	-62.0422
6.95	-62.9272						6.95	-65.2161				6.95	-67.749						6.95	-62.0117
7	-63.1409						7	-65.3381				7	-66.8335						7	-61.7981
7.05	-63.3545						7.05	-65.5518				7.05	-68.6646						7.05	-62.1948
7.1	-63.2935						7.1	-65.5518				7.1	-65.918						7.1	-61.9812
7.15	-63.1409						7.15	-65.4602				7.15	-67.1387						7.15	-61.8286
7.2	-62.8052						7.2	-65.1855				7.2	-68.3594						7.2	-62.1948
7.25	-63.0798						7.25	-65.3076				7.25	-67.4438						7.25	-62.0117
7.3	-63.324						7.3	-65.5823				7.3	-68.6646						7.3	-61.8286
7.35	-63.2324						7.35	-65.4907				7.35	-66.5283						7.35	-62.2253
7.4	-63.1714						7.4	-65.4297				7.4	-69.5801						7.4	-62.1338
7.45	-63.0493						7.45	-65.2771				7.45	-65.3076						7.45	-61.8896
7.5	-63.0493						7.5	-65.155				7.5	-67.749						7.5	-62.2253
7.55	-63.1714						7.55	-65.4907				7.55	-66.2231						7.55	-62.0422
7.6	-63.324						7.6	-65.5823				7.6	-68.9697						7.6	-62.1643
7.65	-63.2935						7.65	-65.4907				7.65	-65.918						7.65	-62.2559
7.7	-63.0798						7.7	-65.3686				7.7	-67.749						7.7	-61.9507
7.75	-62.8967						7.75	-65.1245				7.75	-65.3076						7.75	-62.2253
7.8	-62.9883						7.8	-65.1855				7.8	-69.2749						7.8	-62.2253
7.85	-63.2629						7.85	-65.4297				7.85	-65.918						7.85	-61.8591
7.9	-63.324						7.9	-65.5212				7.9	-68.0542						7.9	-62.1643
7.95	-63.2019						7.95	-65.4602				7.95	-66.2231						7.95	-62.2253
8	-63.0798						8	-65.1855				8	-68.3594						8	-61.9202
8.05	-62.8662						8.05	-65.155				8.05	-66.8335						8.05	-62.1033
8.1	-62.9883						8.1	-65.2161				8.1	-68.0542						8.1	-62.2253
8.15	-63.2629						8.15	-65.3686				8.15	-67.1387						8.15	-62.1033
8.2	-63.2629						8.2	-65.4297				8.2	-66.2231						8.2	-62.0117
8.25	-63.2324						8.25	-65.4602				8.25	-67.749						8.25	-62.2864
8.3	-63.1714						8.3	-65.3381				8.3	-65.6128						8.3	-62.1643
8.35	-63.0493						8.35	-65.1855				8.35	-67.1387						8.35	-61.9507
8.4	-62.9272						8.4	-65.033				8.4	-65.918						8.4	-62.2864
8.45	-63.1409						8.45	-65.2771				8.45	-67.4438						8.45	-62.1948
8.5	-63.2324						8.5	-65.4602				8.5	-66.8335						8.5	-61.9507
8.55	-63.2629						8.55	-65.4602				8.55	-66.2231						8.55	-62.1033
8.6	-63.2019						8.6	-65.3686				8.6	-66.5283						8.6	-62.2559
8.65	-63.1103						8.65	-65.3076				8.65	-65.3076						8.65	-62.1338
8.7	-62.9578						8.7	-65.2466				8.7	-67.4438						8.7	-61.8286
8.75	-62.9272						8.75	-65.0024				8.75	-65.0024						8.75	-62.2253
8.8	-63.1103						8.8	-65.3076				8.8	-67.4438						8.8	-62.1948
8.85	-63.2019						8.85	-65.3992				8.85	-65.6128						8.85	-62.0728
8.9	-63.324						8.9	-65.5823				8.9	-68.0542						8.9	-61.8591
8.95	-63.1714						8.95	-65.3992				8.95	-65.6128						8.95	-62.1948
9	-63.0798						9	-65.4602				9	-66.8335						9	-62.1338
9.05	-62.9578						9.05	-65.2771				9.05	-65.3076						9.05	-62.0117
9.1	-62.8662						9.1	-65.1855				9.1	-68.0542						9.1	-61.8286
9.15	-62.9272						9.15	-65.1855				9.15	-65.0024						9.15	-62.1948
9.2	-63.1409						9.2	-65.4297				9.2	-66.8335						9.2	-62.1338
9.25	-63.1409						9.25	-65.4907				9.25	-66.2231						9.25	-62.0728
9.3	-63.2935						9.3	-65.5518				9.3	-67.749						9.3	-61.7981
9.35	-63.2324						9.35	-65.4602				9.35	-65.918						9.35	-62.1948
9.4	-63.1103						9.4	-65.4907				9.4	-67.1387						9.4	-62.1643
9.45	-62.8967						9.45	-65.3686				9.45	-65.918						9.45	-62.0728
9.5	-62.9578						9.5	-65.2466				9.5	-68.0542						9.5	-61.7065
9.55	-62.8357						9.55	-65.2161				9.55	-65.0024						9.55	-62.1338
9.6	-62.9578						9.6	-65.3076				9.6	-67.1387						9.6	-62.1643
9.65	-63.0798						9.65	-65.4602				9.65	-65.0024						9.65	-62.0728
9.7	-63.2324						9.7	-65.5212				9.7	-67.749						9.7	-61.7371
9.75	-63.2629						9.75	-65.5518				9.75	-65.0024						9.75	-62.0422
9.8	-63.1103						9.8	-65.5518				9.8	-67.749						9.8	-62.1643
9.85	-63.0798						9.85	-65.4602				9.85	-65.0024						9.85	-62.1643
9.9	-63.1103						9.9	-65.3686				9.9	-67.749						9.9	-61.7981
9.95	-62.9578						9.95	-65.3076				9.95	-65.3076						9.95	-61.9202
10	-62.8967						10	-65.2161				10	-66.5283						10	-62.1643
10.05	-62.8662						10.05	-65.1245				10.05	-67.1387						10.05	-62.1948
10.1	-63.0493						10.1	-65.2466				10.1	-66.5283						10.1	-61.9507
10.15	-63.2629						10.15	-65.4907				10.15	-67.4438						10.15	-61.6455
10.2	-63.2629						10.2	-65.5212				10.2	-66.2231						10.2	-62.1338
10.25	-63.2019						10.25	-65.5823				10.25	-68.0542						10.25	-62.1338
10.3	-63.2629						10.3	-65.4907				10.3	-65.6128						10.3	-62.0422
10.35	-63.2019						10.35	-65.5212				10.35	-67.4438						10.35	-61.8591
10.4	-62.9578						10.4	-65.4602				10.4	-65.3076						10.4	-61.8591
10.45	-62.8662						10.45	-65.4602				10.45	-67.4438						10.45	-62.1338
10.5	-63.1714						10.5	-65.3381				10.5	-65.6128						10.5	-62.1338
10.55	-63.324						10.55	-65.3381				10.55	-67.1387						10.55	-61.9812
10.6	-63.1409						10.6	-65.3076				10.6	-65.6128						10.6	-61.8896
10.65	-63.0493						10.65	-65.1855				10.65	-67.1387						10.65	-61.9507
10.7	-62.9578						10.7	-65.2161				10.7	-68.0542						10.7	-62.1033
10.75	-63.2629						10.75	-65.4907				10.75	-66.2231						10.75	-62.0728
10.8	-63.2019						10.8	-65.4907				10.8	-67.749						10.8	-62.1033
10.85	-63.0798						10.85	-65.5823				10.85	-65.918						10.85	-61.7981
10.9	-63.0798						10.9	-65.5823				10.9	-68.0542						10.9	-61.8896
10.95	-63.2935						10.95	-65.6433				10.95	-64.6973						10.95	-62.1033
11	-63.1103						11	-65.5518				11	-67.4438						11	-62.1643
11.05	-63.0188						11.05	-65.5212				11.05	-65.6128						11.05	-62.0728
11.1	-63.385						11.1	-65.5212				11.1	-67.4438						11.1	-61.7676
11.15	-63.1409						11.15	-65.5518				11.15	-67.1387						11.15	-61.8286
11.2	-63.0493						11.2	-65.4602				11.2	-66.2231						11.2	-62.1643
11.25	-63.2324						11.25	-65.4297				11.25	-68.0542						11.25	-62.1948
11.3	-63.0798						11.3	-65.4297				11.3	-65.6128						11.3	-62.0728
11.35	-63.2019						11.35	-65.3381				11.35	-68.0542						11.35	-61.9202
11.4	-63.3545						11.4	-65.2771				11.4	-64.6973						11.4	-61.8286
11.45	-62.9578						11.45	-65.3686				11.45	-67.749						11.45	-62.0422
11.5	-63.2935						11.5	-65.4907				11.5	-64.6973						11.5	-62.1338
11.55	-63.2324						11.55	-65.6433				11.55	-66.8335						11.55	-62.0422
11.6	-63.0188						11.6	-65.7043				11.6	-66.5283						11.6	-62.0728
11.65	-63.3545						11.65	-65.5518				11.65	-65.918						11.65	-61.9202
11.7	-63.1714						11.7	-65.4297				11.7	-67.4438						11.7	-61.7371
11.75	-63.0493						11.75	-65.3381				11.75	-65.6128						11.75	-62.0422
11.8	-63.446						11.8	-65.6128				11.8	-66.5283						11.8	-62.1948
11.85	-63.1409						11.85	-65.6433				11.85	-65.3076						11.85	-62.1033
11.9	-63.2019						11.9	-65.6433				11.9	-65.918						11.9	-61.9812
11.95	-63.324						11.95	-65.3381				11.95	-66.8335						11.95	-61.7981
12	-63.1409						12	-65.6738				12	-65.3076						12	-61.7981
12.05	-63.2019						12.05	-65.7043				12.05	-68.6646						12.05	-62.0117
12.1	-63.324						12.1	-65.5823				12.1	-65.0024						12.1	-62.1338
12.15	-63.2019						12.15	-65.4907				12.15	-67.1387						12.15	-62.0117
12.2	-63.2935						12.2	-65.8569				12.2	-65.6128						12.2	-62.0422
12.25	-63.4155						12.25	-65.7043				12.25	-66.2231						12.25	-61.8896
12.3	-63.2019						12.3	-65.4297				12.3	-67.4438						12.3	-61.676
12.35	-63.1714						12.35	-65.7959				12.35	-65.3076						12.35	-61.7371
12.4	-63.5071						12.4	-65.7654				12.4	-67.749						12.4	-62.0422
12.45	-63.3545						12.45	-65.2771				12.45	-64.3921						12.45	-62.1338
12.5	-63.0493						12.5	-65.8264				12.5	-66.8335						12.5	-62.0117
12.55	-63.446						12.55	-65.8264				12.55	-67.1387						12.55	-61.9812
12.6	-63.5071						12.6	-65.3686				12.6	-65.6128						12.6	-61.8591
12.65	-63.2324						12.65	-65.8264				12.65	-67.749						12.65	-61.7981
12.7	-63.2935						12.7	-65.7349				12.7	-65.3076						12.7	-61.7371
12.75	-63.6597						12.75	-65.4297				12.75	-67.4438						12.75	-61.9507
12.8	-63.446						12.8	-65.8264				12.8	-67.1387						12.8	-62.1033
12.85	-63.1409						12.85	-65.7654				12.85	-64.3921						12.85	-62.1338
12.9	-63.4766						12.9	-65.4602				12.9	-68.0542						12.9	-62.0422
12.95	-63.6597						12.95	-65.8264				12.95	-65.918						12.95	-61.9812
13	-63.4155						13	-65.7959				13	-67.1387						13	-61.9507
13.05	-63.2629						13.05	-65.4602				13.05	-66.8335						13.05	-61.7676
13.1	-63.5986						13.1	-65.5823				13.1	-66.2231						13.1	-61.9812
13.15	-63.5986						13.15	-65.7654				13.15	-68.0542						13.15	-62.1033
13.2	-63.446						13.2	-65.6128				13.2	-64.3921						13.2	-62.1948
13.25	-63.324						13.25	-65.4602				13.25	-66.5283						13.25	-62.2864
13.3	-63.6291						13.3	-65.7349				13.3	-67.4438						13.3	-62.1948
13.35	-63.5986						13.35	-65.7654				13.35	-65.6128						13.35	-62.1033
13.4	-63.385						13.4	-65.4907				13.4	-67.749						13.4	-62.0728
13.45	-63.4155						13.45	-65.6738				13.45	-67.1387						13.45	-61.9812
13.5	-63.6597						13.5	-65.7654				13.5	-67.1387						13.5	-61.9507
13.55	-63.6291						13.55	-65.7349				13.55	-68.3594						13.55	-62.1643
13.6	-63.4155						13.6	-65.4297				13.6	-65.3076						13.6	-62.1643
13.65	-63.4766						13.65	-65.7043				13.65	-66.5283						13.65	-62.2864
13.7	-63.8123						13.7	-65.7349				13.7	-68.0542						13.7	-62.3474
13.75	-63.5986						13.75	-65.6738				13.75	-65.0024						13.75	-62.2253
13.8	-63.446						13.8	-65.3381				13.8	-66.8335						13.8	-62.2864
13.85	-63.5071						13.85	-65.7654				13.85	-67.1387						13.85	-62.2253
13.9	-63.7512						13.9	-65.7349				13.9	-65.918						13.9	-62.1643
13.95	-63.6902						13.95	-65.7654				13.95	-67.749						13.95	-61.9812
14	-63.6597						14	-65.4297				14	-65.3076						14	-61.9812
14.05	-63.4155						14.05	-65.7349				14.05	-66.2231						14.05	-62.1338
14.1	-63.9038						14.1	-65.8264				14.1	-68.3594						14.1	-62.2559
14.15	-63.7207						14.15	-65.6738				14.15	-65.3076						14.15	-62.3779
14.2	-63.6597						14.2	-65.3992				14.2	-66.5283						14.2	-62.4084
14.25	-63.4766						14.25	-65.5518				14.25	-68.0542						14.25	-62.439
14.3	-63.8123						14.3	-65.8569				14.3	-65.918						14.3	-62.2864
14.35	-63.8428						14.35	-65.7349				14.35	-67.749						14.35	-62.3779
14.4	-63.8428						14.4	-65.5212				14.4	-66.8335						14.4	-62.2864
14.45	-63.5071						14.45	-65.4297				14.45	-65.3076						14.45	-62.3169
14.5	-63.7512						14.5	-65.7349				14.5	-68.0542						14.5	-62.2559
14.55	-63.9343						14.55	-65.7043				14.55	-67.1387						14.55	-62.1033
14.6	-63.9343						14.6	-65.6738				14.6	-65.6128						14.6	-62.1643
14.65	-63.6291						14.65	-65.4907				14.65	-68.0542						14.65	-62.4695
14.7	-63.5376						14.7	-65.5518				14.7	-65.918						14.7	-62.5
14.75	-63.8733						14.75	-65.7654				14.75	-65.918						14.75	-62.561
14.8	-63.9954						14.8	-65.7654				14.8	-68.3594						14.8	-62.5915
14.85	-63.9038						14.85	-65.6433				14.85	-66.5283						14.85	-62.5
14.9	-63.6902						14.9	-65.3686				14.9	-67.1387						14.9	-62.2253
14.95	-63.7512						14.95	-65.6128				14.95	-67.749						14.95	-62.561
15	-64.0259						15	-65.8264				15	-66.2231						15	-62.6831
15.05	-63.9954						15.05	-65.6738				15.05	-66.2231						15.05	-62.7441
15.1	-63.8733						15.1	-65.5518				15.1	-68.3594						15.1	-62.4084
15.15	-63.6597						15.15	-65.4602				15.15	-65.918						15.15	-62.439
15.2	-63.7207						15.2	-65.7043				15.2	-66.2231						15.2	-62.6831
15.25	-64.0259						15.25	-65.8264				15.25	-68.0542						15.25	-62.6526
15.3	-63.9343						15.3	-65.7349				15.3	-65.6128						15.3	-62.4084
15.35	-63.9038						15.35	-65.5823				15.35	-67.4438						15.35	-62.8052
15.4	-63.7817						15.4	-65.3992				15.4	-68.3594						15.4	-62.6221
15.45	-63.7512						15.45	-65.7043				15.45	-64.6973						15.45	-62.3169
15.5	-63.9038						15.5	-65.7654				15.5	-67.749						15.5	-62.7747
15.55	-64.0259						15.55	-65.7043				15.55	-65.6128						15.55	-62.6526
15.6	-63.9343						15.6	-65.7043				15.6	-67.749						15.6	-62.2864
15.65	-63.7512						15.65	-65.4297				15.65	-67.1387						15.65	-62.8662
15.7	-63.5376						15.7	-65.5823				15.7	-66.8335						15.7	-62.6831
15.75	-63.9343						15.75	-65.7043				15.75	-68.6646						15.75	-62.4084
15.8	-64.0564						15.8	-65.7349				15.8	-67.1387						15.8	-62.7441
15.85	-63.9038						15.85	-65.7043				15.85	-67.4438						15.85	-62.7136
15.9	-63.9343						15.9	-65.5212				15.9	-66.2231						15.9	-62.5305
15.95	-63.6291						15.95	-65.3992				15.95	-68.0542						15.95	-62.7747
16	-63.6597						16	-65.7349				16	-67.1387						16	-62.5305
16.05	-63.9954						16.05	-65.8264				16.05	-67.749						16.05	-62.7136
16.1	-64.0564						16.1	-65.7654				16.1	-66.2231						16.1	-62.7747
16.15	-63.9648						16.15	-65.6738				16.15	-68.9697						16.15	-62.3779
16.2	-63.9343						16.2	-65.5823				16.2	-67.749						16.2	-62.7136
16.25	-63.7207						16.25	-65.4907				16.25	-66.8335						16.25	-62.8052
16.3	-63.8123						16.3	-65.5823				16.3	-67.1387						16.3	-62.5305
16.35	-64.0564						16.35	-65.7349				16.35	-66.8335						16.35	-62.6526
16.4	-64.1785						16.4	-65.7959				16.4	-68.3594						16.4	-62.6526
16.45	-63.9648						16.45	-65.7349				16.45	-65.3076						16.45	-62.439
16.5	-63.9648						16.5	-65.5518				16.5	-68.0542						16.5	-62.6526
16.55	-63.8123						16.55	-65.4297				16.55	-65.918						16.55	-62.7441
16.6	-63.8428						16.6	-65.6128				16.6	-68.9697						16.6	-62.6221
16.65	-64.0259						16.65	-65.7654				16.65	-66.2231						16.65	-62.5305
16.7	-64.1174						16.7	-65.7959				16.7	-67.749						16.7	-62.8662
16.75	-64.1174						16.75	-65.7349				16.75	-67.749						16.75	-62.6831
16.8	-64.1479						16.8	-65.6433				16.8	-66.8335						16.8	-62.4084
16.85	-63.9954						16.85	-65.5823				16.85	-67.4438						16.85	-62.8052
16.9	-63.8733						16.9	-65.3686				16.9	-65.918						16.9	-62.8052
16.95	-63.7817						16.95	-65.6128				16.95	-68.6646						16.95	-62.6221
17	-64.0564						17	-65.8264				17	-66.5283						17	-62.5
17.05	-64.1785						17.05	-65.8874				17.05	-68.0542						17.05	-62.8052
17.1	-64.1785						17.1	-65.7654				17.1	-65.918						17.1	-62.8357
17.15	-64.0564						17.15	-65.7959				17.15	-68.6646						17.15	-62.439
17.2	-64.0259						17.2	-65.7043				17.2	-66.5283						17.2	-62.5915
17.25	-63.9038						17.25	-65.6128				17.25	-67.4438						17.25	-62.8357
17.3	-63.7512						17.3	-65.6433				17.3	-65.918						17.3	-62.7747
17.35	-63.9648						17.35	-65.918				17.35	-67.749						17.35	-62.4084
17.4	-64.1479						17.4	-66.04				17.4	-65.918						17.4	-62.7441
17.45	-64.2395						17.45	-65.979				17.45	-66.8335						17.45	-62.8967
17.5	-64.0869						17.5	-65.9485				17.5	-67.1387						17.5	-62.8357
17.55	-64.1785						17.55	-65.8874				17.55	-67.4438						17.55	-62.5305
17.6	-64.0869						17.6	-65.8569				17.6	-66.8335						17.6	-62.8662
17.65	-64.0259						17.65	-65.7349				17.65	-67.4438						17.65	-62.8662
17.7	-63.7817						17.7	-65.8264				17.7	-66.5283						17.7	-62.7441
17.75	-63.9038						17.75	-65.918				17.75	-68.6646						17.75	-62.5
17.8	-64.1174						17.8	-66.1316				17.8	-65.918						17.8	-62.8052
17.85	-64.1785						17.85	-66.1316				17.85	-67.749						17.85	-62.9272
17.9	-64.209						17.9	-66.04				17.9	-65.3076						17.9	-62.8662
17.95	-64.0869						17.95	-66.0705				17.95	-69.2749						17.95	-62.5915
18	-64.1785						18	-66.04				18	-64.6973						18	-62.7747
18.05	-64.1174						18.05	-65.8569				18.05	-68.9697						18.05	-62.9883
18.1	-63.9648						18.1	-65.7043				18.1	-65.0024						18.1	-62.8662
18.15	-63.8428						18.15	-65.7959				18.15	-67.749						18.15	-62.5915
18.2	-63.8733						18.2	-65.918				18.2	-64.6973						18.2	-62.6831
18.25	-63.9954						18.25	-66.0095				18.25	-67.4438						18.25	-62.9578
18.3	-64.1479						18.3	-66.1316				18.3	-65.3076						18.3	-62.8967
18.35	-64.2395						18.35	-66.0705				18.35	-67.4438						18.35	-62.8052
18.4	-64.2395						18.4	-65.9485				18.4	-67.1387						18.4	-62.6221
18.45	-64.1785						18.45	-65.979				18.45	-67.1387						18.45	-62.9883
18.5	-64.1785						18.5	-65.918				18.5	-67.4438						18.5	-62.9578
18.55	-64.0259						18.55	-65.7654				18.55	-65.6128						18.55	-62.8662
18.6	-64.0564						18.6	-65.6738				18.6	-68.6646						18.6	-62.6831
18.65	-63.7817						18.65	-65.6128				18.65	-65.6128						18.65	-62.7441
18.7	-63.9038						18.7	-65.7654				18.7	-68.0542						18.7	-63.0493
18.75	-64.0259						18.75	-65.8569				18.75	-65.0024						18.75	-62.9883
18.8	-64.209						18.8	-65.918				18.8	-67.749						18.8	-62.8052
18.85	-64.1479						18.85	-65.979				18.85	-65.6128						18.85	-62.5915
18.9	-64.0869						18.9	-66.0705				18.9	-67.1387						18.9	-63.0798
18.95	-63.7817						18.95	-65.9485				18.95	-65.3076						18.95	-63.0188
19	-64.0869						19	-65.918				19	-66.8335						19	-63.0493
19.05	-64.1785						19.05	-65.979				19.05	-66.8335						19.05	-62.8357
19.1	-64.1479						19.1	-65.8874				19.1	-65.918						19.1	-62.7747
19.15	-63.7817						19.15	-65.8874				19.15	-66.8335						19.15	-63.0493
19.2	-64.1174						19.2	-65.7349				19.2	-66.2231						19.2	-62.9883
19.25	-64.209						19.25	-65.8264				19.25	-68.0542						19.25	-62.9883
19.3	-63.9648						19.3	-65.7043				19.3	-64.6973						19.3	-62.8662
19.35	-64.0564						19.35	-65.6433				19.35	-67.1387						19.35	-62.7136
19.4	-64.1479						19.4	-65.6128				19.4	-65.6128						19.4	-62.9883
19.45	-64.0869						19.45	-65.7349				19.45	-67.1387						19.45	-63.0188
19.5	-64.1174						19.5	-65.7959				19.5	-66.5283						19.5	-63.0798
19.55	-64.209						19.55	-65.8874				19.55	-65.0024						19.55	-62.8967
19.6	-63.8428						19.6	-65.8569				19.6	-68.9697						19.6	-62.6526
19.65	-64.2395						19.65	-66.0095				19.65	-65.6128						19.65	-62.9578
19.7	-64.3005						19.7	-65.9485				19.7	-68.3594						19.7	-63.2019
19.75	-63.8733						19.75	-65.918				19.75	-65.0024						19.75	-63.0188
19.8	-64.2395						19.8	-65.7959				19.8	-67.4438						19.8	-62.9578
19.85	-64.27						19.85	-65.918				19.85	-66.5283						19.85	-62.7441
19.9	-63.9954						19.9	-65.6128				19.9	-65.918						19.9	-62.8357
19.95	-64.3005						19.95	-65.6433				19.95	-67.749						19.95	-63.1409
20	-63.9954						20	-65.8264				20	-65.6128						20	-63.0493
20.05	-64.1785						20.05	-66.0095				20.05	-69.2749						20.05	-63.0188
20.1	-64.3005						20.1	-65.979				20.1	-64.3921						20.1	-62.9578
20.15	-63.8123						20.15	-65.7654				20.15	-67.1387						20.15	-62.7441
20.2	-64.2395						20.2	-65.6433				20.2	-67.1387						20.2	-62.8967
20.25	-64.3005						20.25	-66.04				20.25	-66.2231						20.25	-63.1409
20.3	-63.8733						20.3	-65.918				20.3	-68.3594						20.3	-63.2019
20.35	-64.27						20.35	-65.7349				20.35	-65.6128						20.35	-63.1409
20.4	-64.2395						20.4	-65.6433				20.4	-68.9697						20.4	-62.9578
20.45	-63.8733						20.45	-66.0705				20.45	-65.3076						20.45	-62.8052
20.5	-64.3005						20.5	-65.918				20.5	-67.1387						20.5	-62.9578
20.55	-64.1479						20.55	-65.4907				20.55	-68.0542						20.55	-63.2019
20.6	-63.9343						20.6	-65.918				20.6	-65.918						20.6	-63.2324
20.65	-64.209						20.65	-65.979				20.65	-68.0542						20.65	-63.1714
20.7	-64.209						20.7	-65.5823				20.7	-65.0024						20.7	-63.1103
20.75	-63.8733						20.75	-65.7959				20.75	-67.1387						20.75	-62.9883
20.8	-64.0259						20.8	-65.8569				20.8	-67.4438						20.8	-62.8967
20.85	-64.209						20.85	-65.6128				20.85	-65.6128						20.85	-63.0493
20.9	-64.1479						20.9	-65.8264				20.9	-67.749						20.9	-63.2324
20.95	-63.7817						20.95	-65.7959				20.95	-65.3076						20.95	-63.324
21	-64.1785						21	-65.4602				21	-67.1387						21	-63.1409
21.05	-64.209						21.05	-65.7654				21.05	-66.5283						21.05	-63.1103
21.1	-63.9038						21.1	-65.918				21.1	-66.5283						21.1	-63.0188
21.15	-63.8733						21.15	-65.4907				21.15	-67.4438						21.15	-62.9272
21.2	-64.1479						21.2	-65.7349				21.2	-65.918						21.2	-62.9578
21.25	-64.0869						21.25	-65.7349				21.25	-67.4438						21.25	-63.1714
21.3	-63.7512						21.3	-65.6128				21.3	-67.1387						21.3	-63.1714
21.35	-64.0564						21.35	-65.5212				21.35	-64.6973						21.35	-63.2019
21.4	-63.9343						21.4	-65.7654				21.4	-67.749						21.4	-63.0798
21.45	-63.8428						21.45	-65.6738				21.45	-64.6973						21.45	-62.9578
21.5	-63.7512						21.5	-65.4907				21.5	-66.8335						21.5	-62.8052
21.55	-64.0259						21.55	-65.7654				21.55	-67.1387						21.55	-62.8357
21.6	-63.9954						21.6	-65.7654				21.6	-65.3076						21.6	-62.9578
21.65	-63.7817						21.65	-65.5518				21.65	-68.0542						21.65	-63.1714
21.7	-63.7817						21.7	-65.6738				21.7	-65.6128						21.7	-63.1409
21.75	-64.0564						21.75	-65.7654				21.75	-65.918						21.75	-63.1409
21.8	-63.9038						21.8	-65.6128				21.8	-68.0542						21.8	-63.0798
21.85	-63.6902						21.85	-65.3686				21.85	-65.6128						21.85	-63.0493
21.9	-63.7207						21.9	-65.6433				21.9	-67.1387						21.9	-62.9272
21.95	-63.9954						21.95	-65.7043				21.95	-67.1387						21.95	-62.7747
22	-63.7817						22	-65.6128				22	-65.3076						22	-62.8357
22.05	-63.6597						22.05	-65.3076				22.05	-67.1387						22.05	-62.9883
22.1	-63.6597						22.1	-65.6738				22.1	-65.918						22.1	-63.1103
22.15	-63.9038						22.15	-65.7349				22.15	-65.3076						22.15	-63.1409
22.2	-63.8123						22.2	-65.6738				22.2	-67.4438						22.2	-63.0798
22.25	-63.6291						22.25	-65.3992				22.25	-65.3076						22.25	-63.0188
22.3	-63.5986						22.3	-65.6738				22.3	-66.8335						22.3	-62.9883
22.35	-63.9648						22.35	-65.7959				22.35	-67.749						22.35	-62.9272
22.4	-63.8123						22.4	-65.6738				22.4	-65.0024						22.4	-62.8052
22.45	-63.5986						22.45	-65.4602				22.45	-68.0542						22.45	-62.5915
22.5	-63.5071						22.5	-65.5212				22.5	-67.1387						22.5	-62.7136
22.55	-63.7817						22.55	-65.8569				22.55	-65.918						22.55	-62.8357
22.6	-63.7207						22.6	-65.7654				22.6	-66.2231						22.6	-62.9578
22.65	-63.6291						22.65	-65.6433				22.65	-67.4438						22.65	-62.9272
22.7	-63.446						22.7	-65.4602				22.7	-66.5283						22.7	-62.9272
22.75	-63.7512						22.75	-65.7959				22.75	-68.0542						22.75	-62.9883
22.8	-63.7512						22.8	-65.8569				22.8	-65.0024						22.8	-62.8967
22.85	-63.6902						22.85	-65.8264				22.85	-66.5283						22.85	-62.8662
22.9	-63.5376						22.9	-65.5212				22.9	-68.6646						22.9	-62.7136
22.95	-63.5071						22.95	-65.7043				22.95	-65.0024						22.95	-62.5915
23	-63.6902						23	-65.8569				23	-66.5283						23	-62.5
23.05	-63.5681						23.05	-65.8874				23.05	-67.749						23.05	-62.6831
23.1	-63.5986						23.1	-65.7349				23.1	-65.6128						23.1	-62.8052
23.15	-63.324						23.15	-65.5823				23.15	-66.8335						23.15	-62.8967
23.2	-63.5071						23.2	-65.7349				23.2	-68.0542						23.2	-62.8662
23.25	-63.6597						23.25	-65.8874				23.25	-66.5283						23.25	-62.5915
23.3	-63.6902						23.3	-65.8874				23.3	-67.749						23.3	-62.4084
23.35	-63.4766						23.35	-65.7654				23.35	-68.3594						23.35	-62.7747
23.4	-63.324						23.4	-65.5823				23.4	-65.918						23.4	-62.6831
23.45	-63.5681						23.45	-65.7654				23.45	-66.8335						23.45	-62.6526
23.5	-63.7512						23.5	-66.04				23.5	-68.9697						23.5	-62.3474
23.55	-63.6597						23.55	-65.8874				23.55	-65.3076						23.55	-62.8052
23.6	-63.446						23.6	-65.7654				23.6	-66.5283						23.6	-62.7441
23.65	-63.2019						23.65	-65.5212				23.65	-68.3594						23.65	-62.3474
23.7	-63.5681						23.7	-65.8264				23.7	-65.918						23.7	-62.561
23.75	-63.6597						23.75	-65.9485				23.75	-67.1387						23.75	-62.7136
23.8	-63.5681						23.8	-65.918				23.8	-66.5283						23.8	-62.4084
23.85	-63.4155						23.85	-65.7349				23.85	-67.1387						23.85	-62.5305
23.9	-63.2019						23.9	-65.7349				23.9	-68.0542						23.9	-62.5915
23.95	-63.4766						23.95	-65.7349				23.95	-65.6128						23.95	-62.3474
24	-63.5376						24	-65.9485				24	-68.6646						24	-62.561
24.05	-63.5986						24.05	-65.8569				24.05	-65.918						24.05	-62.6221
24.1	-63.5071						24.1	-65.979				24.1	-68.6646						24.1	-62.1643
24.15	-63.2935						24.15	-65.7959				24.15	-65.6128						24.15	-62.7441
24.2	-63.2629						24.2	-65.6128				24.2	-68.6646						24.2	-62.6526
24.25	-63.5681						24.25	-65.7349				24.25	-65.6128						24.25	-62.1948
24.3	-63.6291						24.3	-66.0705				24.3	-67.749						24.3	-62.6526
24.35	-63.5071						24.35	-65.9485				24.35	-65.3076						24.35	-62.6221
24.4	-63.3545						24.4	-65.8874				24.4	-68.0542						24.4	-62.3169
24.45	-63.2019						24.45	-65.6433				24.45	-65.918						24.45	-62.6831
24.5	-63.324						24.5	-65.5823				24.5	-68.6646						24.5	-62.5305
24.55	-63.5681						24.55	-65.7959				24.55	-65.918						24.55	-62.4084
24.6	-63.5071						24.6	-65.9485				24.6	-67.1387						24.6	-62.6831
24.65	-63.446						24.65	-65.8264				24.65	-67.4438						24.65	-62.561
24.7	-63.4155						24.7	-65.918				24.7	-67.4438						24.7	-62.5
24.75	-63.2019						24.75	-65.7959				24.75	-67.1387						24.75	-62.8357
24.8	-63.324						24.8	-65.5518				24.8	-65.918						24.8	-62.6831
24.85	-63.4766						24.85	-65.5823				24.85	-68.0542						24.85	-62.3474
24.9	-63.6291						24.9	-65.918				24.9	-65.3076						24.9	-62.7441
24.95	-63.5071						24.95	-65.9485				24.95	-68.6646						24.95	-62.7441
25	-63.4155						25	-65.7959				25	-64.6973						25	-62.439
25.05	-63.2324						25.05	-65.7654				25.05	-68.3594						25.05	-62.7136
25.1	-63.1409						25.1	-65.6433				25.1	-66.2231						25.1	-62.7441
25.15	-63.385						25.15	-65.5823				25.15	-68.0542						25.15	-62.6526
25.2	-63.5681						25.2	-65.6433				25.2	-66.5283						25.2	-62.6526
25.25	-63.4766						25.25	-65.8569				25.25	-66.2231						25.25	-62.8967
25.3	-63.5071						25.3	-65.8264				25.3	-67.749						25.3	-62.8052
25.35	-63.3545						25.35	-65.7959				25.35	-65.918						25.35	-62.4695
25.4	-63.2629						25.4	-65.7043				25.4	-68.0542						25.4	-62.8052
25.45	-63.1409						25.45	-65.5212				25.45	-65.3076						25.45	-62.8052
25.5	-63.3545						25.5	-65.4602				25.5	-68.3594						25.5	-62.7441
25.55	-63.4766						25.55	-65.5518				25.55	-65.6128						25.55	-62.5
25.6	-63.5681						25.6	-65.6738				25.6	-67.4438						25.6	-62.9272
25.65	-63.446						25.65	-65.7349				25.65	-65.3076						25.65	-62.7441
25.7	-63.385						25.7	-65.7349				25.7	-68.3594						25.7	-62.6831
25.75	-63.2629						25.75	-65.7043				25.75	-66.5283						25.75	-62.6526
25.8	-63.1714						25.8	-65.5212				25.8	-68.0542						25.8	-62.9272
25.85	-63.1103						25.85	-65.3686				25.85	-65.3076						25.85	-62.8662
25.9	-63.324						25.9	-65.2466				25.9	-69.2749						25.9	-62.6221
25.95	-63.446						25.95	-65.3381				25.95	-66.5283						25.95	-62.5915
26	-63.5376						26	-65.4297				26	-68.0542						26	-62.8967
26.05	-63.3545						26.05	-65.5823				26.05	-65.6128						26.05	-62.7747
26.1	-63.4155						26.1	-65.6433				26.1	-68.9697						26.1	-62.6526
26.15	-63.2629						26.15	-65.4297				26.15	-65.918						26.15	-62.5915
26.2	-63.2019						26.2	-65.4297				26.2	-68.0542						26.2	-62.9272
26.25	-63.1103						26.25	-65.4297				26.25	-65.0024						26.25	-62.8357
26.3	-63.1714						26.3	-65.2771				26.3	-68.9697						26.3	-62.5915
26.35	-63.4155						26.35	-65.1855				26.35	-65.0024						26.35	-62.561
26.4	-63.446						26.4	-65.1245				26.4	-68.3594						26.4	-62.8357
26.45	-63.446						26.45	-65.2771				26.45	-65.6128						26.45	-62.8052
26.5	-63.324						26.5	-65.3992				26.5	-68.3594						26.5	-62.6526
26.55	-63.385						26.55	-65.5212				26.55	-66.8335						26.55	-62.3779
26.6	-63.385						26.6	-65.4907				26.6	-67.749						26.6	-62.8357
26.65	-63.2019						26.65	-65.3992				26.65	-66.2231						26.65	-62.7747
26.7	-63.0798						26.7	-65.4297				26.7	-67.749						26.7	-62.6831
26.75	-63.0188						26.75	-65.3686				26.75	-68.9697						26.75	-62.4695
26.8	-63.1714						26.8	-65.2161				26.8	-66.2231						26.8	-62.5
26.85	-63.324						26.85	-65.155				26.85	-68.0542						26.85	-62.7441
26.9	-63.385						26.9	-65.0024				26.9	-66.5283						26.9	-62.6221
26.95	-63.385						26.95	-65.0635				26.95	-69.5801						26.95	-62.4084
27	-63.324						27	-65.155				27	-65.0024						27	-62.3474
27.05	-63.2324						27.05	-65.2466				27.05	-68.6646						27.05	-62.7441
27.1	-63.0188						27.1	-65.3686				27.1	-66.2231						27.1	-62.6831
27.15	-63.1103						27.15	-65.3076				27.15	-68.0542						27.15	-62.5915
27.2	-63.385						27.2	-65.3992				27.2	-66.2231						27.2	-62.439
27.25	-63.324						27.25	-65.2771				27.25	-67.749						27.25	-62.3779
27.3	-63.2935						27.3	-65.2161				27.3	-67.4438						27.3	-62.6831
27.35	-63.0798						27.35	-65.2771				27.35	-66.8335						27.35	-62.561
27.4	-63.2324						27.4	-65.2161				27.4	-68.0542						27.4	-62.5
27.45	-63.3545						27.45	-65.094				27.45	-66.2231						27.45	-62.2559
27.5	-63.2019						27.5	-65.033				27.5	-69.5801						27.5	-62.2864
27.55	-63.0188						27.55	-65.0024				27.55	-65.918						27.55	-62.561
27.6	-63.385						27.6	-64.9414				27.6	-68.6646						27.6	-62.5305
27.65	-63.2935						27.65	-64.8498				27.65	-65.918						27.65	-62.3779
27.7	-62.9272						27.7	-64.8804				27.7	-68.0542						27.7	-62.1948
27.75	-63.3545						27.75	-64.9719				27.75	-66.2231						27.75	-62.2559
27.8	-63.2629						27.8	-65.0635				27.8	-67.1387						27.8	-62.561
27.85	-62.8052						27.85	-65.0635				27.85	-67.4438						27.85	-62.5
27.9	-63.4155						27.9	-65.155				27.9	-66.8335						27.9	-62.3779
27.95	-63.2324						27.95	-65.2466				27.95	-68.3594						27.95	-62.2559
28	-62.9883						28	-65.2161				28	-65.6128						28	-62.1948
28.05	-63.324						28.05	-65.0635				28.05	-68.3594						28.05	-62.4695
28.1	-63.2324						28.1	-65.094				28.1	-65.6128						28.1	-62.4695
28.15	-63.2019						28.15	-65.1245				28.15	-67.4438						28.15	-62.3779
28.2	-63.385						28.2	-64.9414				28.2	-65.918						28.2	-62.3169
28.25	-62.8967						28.25	-64.7888				28.25	-66.5283						28.25	-62.1033
28.3	-63.324						28.3	-64.9719				28.3	-67.4438						28.3	-62.1338
28.35	-63.324						28.35	-65.2161				28.35	-65.6128						28.35	-62.3779
28.4	-62.9883						28.4	-65.2161				28.4	-68.9697						28.4	-62.3169
28.45	-63.324						28.45	-65.033				28.45	-65.0024						28.45	-62.2559
28.5	-63.2629						28.5	-64.7583				28.5	-67.749						28.5	-62.0117
28.55	-62.9272						28.55	-65.0635				28.55	-66.5283						28.55	-61.8896
28.6	-63.3545						28.6	-65.2466				28.6	-66.5283						28.6	-62.0728
28.65	-63.1714						28.65	-65.1245				28.65	-67.1387						28.65	-62.2559
28.7	-62.9883						28.7	-64.8498				28.7	-65.0024						28.7	-62.1643
28.75	-63.324						28.75	-65.1855				28.75	-68.6646						28.75	-62.1338
28.8	-63.2629						28.8	-65.2161				28.8	-64.6973						28.8	-61.9507
28.85	-62.9883						28.85	-64.9719				28.85	-67.1387						28.85	-61.8591
28.9	-63.3545						28.9	-64.9109				28.9	-67.1387						28.9	-62.0117
28.95	-63.2324						28.95	-65.2161				28.95	-67.4438						28.95	-62.1643
29	-62.8967						29	-65.094				29	-68.6646						29	-62.2253
29.05	-63.324						29.05	-64.9414				29.05	-65.3076						29.05	-62.1643
29.1	-63.1714						29.1	-65.2161				29.1	-67.4438						29.1	-61.9812
29.15	-63.0493						29.15	-65.1245				29.15	-65.918						29.15	-61.7676
29.2	-63.1409						29.2	-64.8804				29.2	-66.8335						29.2	-61.7371
29.25	-63.324						29.25	-65.2161				29.25	-68.0542						29.25	-62.0117
29.3	-63.1714						29.3	-65.0635				29.3	-65.3076						29.3	-62.0728
29.35	-62.9883						29.35	-64.8804				29.35	-68.6646						29.35	-62.0728
29.4	-63.2935						29.4	-65.2161				29.4	-66.8335						29.4	-62.0117
29.45	-63.2629						29.45	-65.094				29.45	-67.4438						29.45	-61.9507
29.5	-62.8967						29.5	-64.8193				29.5	-67.749						29.5	-61.7676
29.55	-63.2019						29.55	-65.3076				29.55	-65.918						29.55	-61.615
29.6	-63.324						29.6	-65.155				29.6	-68.3594						29.6	-61.8286
29.65	-63.1714						29.65	-64.7583				29.65	-66.2231						29.65	-62.0422
29.7	-62.9272						29.7	-65.1245				29.7	-67.1387						29.7	-62.0117
29.75	-63.2935						29.75	-65.155				29.75	-68.3594						29.75	-61.9202
29.8	-63.3545						29.8	-64.9414				29.8	-66.2231						29.8	-61.9202
29.85	-63.1103						29.85	-64.9719				29.85	-67.749						29.85	-61.7371
29.9	-63.1103						29.9	-65.2466				29.9	-67.4438						29.9	-61.4929
29.95	-63.385						29.95	-65.094				29.95	-66.5283						29.95	-61.554
30	-63.385						30	-64.9109				30	-68.9697						30	-61.7371
30.05	-63.0798						30.05	-65.1245				30.05	-65.3076						30.05	-61.7981
30.1	-63.1103						30.1	-65.1245				30.1	-66.8335						30.1	-61.9202
30.15	-63.2935						30.15	-65.0024				30.15	-68.6646						30.15	-61.7981
30.2	-63.3545						30.2	-64.8804				30.2	-66.8335						30.2	-61.8286
30.25	-63.0493						30.25	-65.1855				30.25	-68.0542						30.25	-61.676
30.3	-63.2324						30.3	-65.2466				30.3	-66.2231						30.3	-61.5845
30.35	-63.2324						30.35	-64.8804				30.35	-67.749						30.35	-61.4014
30.4	-63.324						30.4	-64.9109				30.4	-69.2749						30.4	-61.4624
30.45	-63.0188						30.45	-65.1855				30.45	-64.6973						30.45	-61.5845
30.5	-63.1103						30.5	-65.033				30.5	-67.749						30.5	-61.7981
30.55	-63.3545						30.55	-65.033				30.55	-67.749						30.55	-61.8286
30.6	-63.385						30.6	-64.7888				30.6	-65.6128						30.6	-61.7065
30.65	-63.1103						30.65	-65.1245				30.65	-68.6646						30.65	-61.7065
30.7	-63.0493						30.7	-65.0635				30.7	-66.8335						30.7	-61.7065
30.75	-63.385						30.75	-64.9719				30.75	-66.8335						30.75	-61.554
30.8	-63.3545						30.8	-64.7583				30.8	-68.0542						30.8	-61.554
30.85	-63.1103						30.85	-65.0024				30.85	-66.8335						30.85	-61.4319
30.9	-62.9883						30.9	-65.033				30.9	-67.4438						30.9	-61.4624
30.95	-63.2935						30.95	-65.0635				30.95	-69.2749						30.95	-61.4319
31	-63.385						31	-64.6667				31	-66.5283						31	-61.615
31.05	-63.2324						31.05	-64.8193				31.05	-67.1387						31.05	-61.7065
31.1	-62.9272						31.1	-65.0635				31.1	-68.3594						31.1	-61.7676
31.15	-63.1409						31.15	-64.9719				31.15	-66.2231						31.15	-61.7371
31.2	-63.3545						31.2	-64.8193				31.2	-67.4438						31.2	-61.615
31.25	-63.2935						31.25	-64.5447				31.25	-68.3594						31.25	-61.7371
31.3	-63.0188						31.3	-64.8498				31.3	-65.3076						31.3	-61.7676
31.35	-63.0188						31.35	-65.0024				31.35	-68.3594						31.35	-61.5234
31.4	-63.2629						31.4	-64.8804				31.4	-68.6646						31.4	-61.4624
31.45	-63.2629						31.45	-64.7583				31.45	-65.918						31.45	-61.6455
31.5	-63.1409						31.5	-64.6667				31.5	-67.4438						31.5	-61.8896
31.55	-62.8967						31.55	-64.8804				31.55	-67.749						31.55	-61.7371
31.6	-63.0188						31.6	-64.9719				31.6	-66.2231						31.6	-61.676
31.65	-63.2629						31.65	-64.9414				31.65	-68.6646						31.65	-61.3708
31.7	-63.1714						31.7	-64.6362				31.7	-67.4438						31.7	-61.676
31.75	-63.0493						31.75	-64.6057				31.75	-65.918						31.75	-61.7981
31.8	-62.8967						31.8	-64.9109				31.8	-68.9697						31.8	-61.7065
31.85	-63.0798						31.85	-64.9109				31.85	-67.749						31.85	-61.4624
31.9	-63.1714						31.9	-64.8804				31.9	-65.3076						31.9	-61.8591
31.95	-63.1103						31.95	-64.6057				31.95	-67.749						31.95	-61.7981
32	-62.9578						32	-64.5447				32	-67.4438						32	-61.5845
32.05	-62.7136						32.05	-64.8804				32.05	-66.5283						32.05	-61.7065
32.1	-62.9272						32.1	-64.9109				32.1	-68.6646						32.1	-61.8286
32.15	-63.1409						32.15	-64.7888				32.15	-65.0024						32.15	-61.554
32.2	-62.9883						32.2	-64.6973				32.2	-68.3594						32.2	-61.5845
32.25	-62.8967						32.25	-64.4531				32.25	-67.4438						32.25	-61.8591
32.3	-62.6831						32.3	-64.6362				32.3	-67.4438						32.3	-61.615
32.35	-62.8662						32.35	-64.7888				32.35	-68.0542						32.35	-61.676
32.4	-63.1103						32.4	-64.7888				32.4	-66.8335						32.4	-61.7371
32.45	-63.0493						32.45	-64.7278				32.45	-69.2749						32.45	-61.615
32.5	-62.9883						32.5	-64.6667				32.5	-66.5283						32.5	-61.7981
32.55	-62.8357						32.55	-64.5142				32.55	-68.0542						32.55	-61.7676
32.6	-62.6526						32.6	-64.8804				32.6	-66.8335						32.6	-61.3403
32.65	-62.9578						32.65	-64.8804				32.65	-68.9697						32.65	-61.9202
32.7	-63.0493						32.7	-64.7888				32.7	-66.8335						32.7	-61.7065
32.75	-62.9578						32.75	-64.7278				32.75	-68.3594						32.75	-61.5234
32.8	-62.8357						32.8	-64.5752				32.8	-66.2231						32.8	-61.7981
32.85	-62.6831						32.85	-64.5752				32.85	-68.3594						32.85	-61.7371
32.9	-62.7136						32.9	-64.7583				32.9	-66.5283						32.9	-61.6455
32.95	-62.9578						32.95	-64.7888				32.95	-67.1387						32.95	-61.8286
33	-63.0493						33	-64.8498				33	-68.3594						33	-61.676
33.05	-63.0188						33.05	-64.7888				33.05	-65.918						33.05	-61.676
33.1	-62.9272						33.1	-64.5752				33.1	-67.1387						33.1	-61.9202
33.15	-62.7136						33.15	-64.3921				33.15	-65.3076						33.15	-61.7371
33.2	-62.6526						33.2	-64.7278				33.2	-68.6646						33.2	-61.4929
33.25	-63.0188						33.25	-64.8804				33.25	-66.2231						33.25	-61.9507
33.3	-63.0798						33.3	-64.8804				33.3	-67.749						33.3	-61.8286
33.35	-63.0188						33.35	-64.8193				33.35	-66.5283						33.35	-61.5234
33.4	-62.8967						33.4	-64.8498				33.4	-67.749						33.4	-61.8591
33.45	-62.9272						33.45	-64.5752				33.45	-67.1387						33.45	-61.9202
33.5	-62.6526						33.5	-64.4836				33.5	-65.918						33.5	-61.7981
33.55	-62.7441						33.55	-64.7888				33.55	-67.4438						33.55	-61.7065
33.6	-62.9883						33.6	-65.0024				33.6	-66.5283						33.6	-61.9507
33.65	-63.1409						33.65	-64.9719				33.65	-68.9697						33.65	-61.8896
33.7	-63.0493						33.7	-64.9109				33.7	-65.6128						33.7	-61.676
33.75	-62.9883						33.75	-64.8498				33.75	-68.3594						33.75	-61.9507
33.8	-62.8357						33.8	-64.8193				33.8	-65.918						33.8	-61.9507
33.85	-62.8052						33.85	-64.6362				33.85	-68.3594						33.85	-61.7981
33.9	-62.8357						33.9	-64.7583				33.9	-66.8335						33.9	-61.676
33.95	-63.0188						33.95	-64.9109				33.95	-67.4438						33.95	-61.9507
34	-63.1409						34	-65.033				34	-67.749						34	-62.0117
34.05	-63.1103						34.05	-65.094				34.05	-67.4438						34.05	-61.7065
34.1	-63.1409						34.1	-64.8804				34.1	-66.5283						34.1	-61.7676
34.15	-62.9883						34.15	-64.8804				34.15	-66.5283						34.15	-61.9812
34.2	-62.8357						34.2	-64.7888				34.2	-67.4438						34.2	-61.9507
34.25	-62.7136						34.25	-64.7888				34.25	-66.8335						34.25	-61.7065
34.3	-62.8662						34.3	-64.7278				34.3	-66.8335						34.3	-61.9507
34.35	-62.9578						34.35	-64.9414				34.35	-67.1387						34.35	-62.0117
34.4	-63.1409						34.4	-65.0635				34.4	-66.2231						34.4	-61.9507
34.45	-63.1714						34.45	-65.1245				34.45	-67.4438						34.45	-61.7065
34.5	-63.1103						34.5	-64.9414				34.5	-67.1387						34.5	-61.9812
34.55	-63.0188						34.55	-65.0635				34.55	-66.8335						34.55	-62.1033
34.6	-62.9883						34.6	-65.0024				34.6	-65.918						34.6	-62.0422
34.65	-62.8052						34.65	-64.9109				34.65	-68.0542						34.65	-61.8286
34.7	-62.8967						34.7	-64.6667				34.7	-66.2231						34.7	-62.0117
34.75	-62.8052						34.75	-64.7583				34.75	-68.0542						34.75	-62.1338
34.8	-63.1103						34.8	-64.8804				34.8	-65.3076						34.8	-62.1033
34.85	-63.2019						34.85	-65.155				34.85	-68.3594						34.85	-61.9812
34.9	-63.2629						34.9	-65.1245				34.9	-65.918						34.9	-61.9202
34.95	-63.1409						34.95	-65.1245				34.95	-67.4438						34.95	-62.2253
35	-63.1103						35	-65.1855				35	-65.6128						35	-62.2253
35.05	-63.1409						35.05	-65.094				35.05	-68.3594						35.05	-62.0728
35.1	-63.0188						35.1	-65.033				35.1	-66.8335						35.1	-61.9507
35.15	-62.8357						35.15	-65.0024				35.15	-66.8335						35.15	-62.2864
35.2	-62.8662						35.2	-64.9719				35.2	-66.2231						35.2	-62.3169
35.25	-63.0188						35.25	-64.8193				35.25	-67.4438						35.25	-62.1643
35.3	-63.2019						35.3	-64.8804				35.3	-68.0542						35.3	-61.8896
35.35	-63.1714						35.35	-64.9719				35.35	-66.2231						35.35	-62.1948
35.4	-63.1409						35.4	-65.1855				35.4	-67.749						35.4	-62.3474
35.45	-63.2019						35.45	-65.2771				35.45	-66.2231						35.45	-62.2864
35.5	-62.9883						35.5	-65.3381				35.5	-68.3594						35.5	-62.1643
35.55	-63.0188						35.55	-65.2161				35.55	-65.3076						35.55	-62.0422
35.6	-63.2629						35.6	-65.2771				35.6	-67.4438						35.6	-62.3474
35.65	-63.2935						35.65	-65.2466				35.65	-66.2231						35.65	-62.3779
35.7	-63.1103						35.7	-65.1855				35.7	-67.749						35.7	-62.2864
35.75	-62.9883						35.75	-65.1245				35.75	-67.1387						35.75	-62.0728
35.8	-63.2935						35.8	-65.2161				35.8	-66.5283						35.8	-62.1033
35.85	-63.2935						35.85	-65.033				35.85	-68.0542						35.85	-62.4695
35.9	-63.0798						35.9	-65.155				35.9	-66.5283						35.9	-62.3474
35.95	-63.2324						35.95	-64.9719				35.95	-67.749						35.95	-62.4084
36	-63.2324						36	-65.0024				36	-65.0024						36	-62.1643
36.05	-63.0798						36.05	-65.0024				36.05	-68.9697						36.05	-62.2253
36.1	-63.1714						36.1	-65.1245				36.1	-65.6128						36.1	-62.6221
36.15	-63.385						36.15	-65.2161				36.15	-68.3594						36.15	-62.4695
36.2	-63.1409						36.2	-65.2466				36.2	-66.8335						36.2	-62.4695
36.25	-63.2629						36.25	-65.3076				36.25	-66.8335						36.25	-62.2559
36.3	-63.324						36.3	-65.5212				36.3	-68.0542						36.3	-62.2559
36.35	-62.9883						36.35	-65.3992				36.35	-66.2231						36.35	-62.561
36.4	-63.3545						36.4	-65.3992				36.4	-68.0542						36.4	-62.5305
36.45	-63.385						36.45	-65.3381				36.45	-66.2231						36.45	-62.439
36.5	-63.0798						36.5	-65.3992				36.5	-68.3594						36.5	-62.4084
36.55	-63.4155						36.55	-65.2466				36.55	-65.0024						36.55	-62.2559
36.6	-63.324						36.6	-64.9414				36.6	-67.749						36.6	-62.5305
36.65	-63.1714						36.65	-65.1855				36.65	-67.4438						36.65	-62.6526
36.7	-63.5071						36.7	-65.4602				36.7	-66.5283						36.7	-62.6221
36.75	-63.1714						36.75	-65.3686				36.75	-67.749						36.75	-62.561
36.8	-63.446						36.8	-65.3076				36.8	-65.6128						36.8	-62.3474
36.85	-63.3545						36.85	-65.094				36.85	-68.0542						36.85	-62.4084
36.9	-63.1103						36.9	-65.3381				36.9	-65.918						36.9	-62.7136
36.95	-63.4766						36.95	-65.4602				36.95	-66.2231						36.95	-62.7747
37	-63.4155						37	-65.3076				37	-67.749						37	-62.7136
37.05	-63.0188						37.05	-65.155				37.05	-66.2231						37.05	-62.561
37.1	-63.5071						37.1	-65.4602				37.1	-68.0542						37.1	-62.439
37.15	-63.446						37.15	-65.4907				37.15	-65.0024						37.15	-62.5
37.2	-63.2019						37.2	-65.1855				37.2	-68.3594						37.2	-62.6831
37.25	-63.4766						37.25	-65.3381				37.25	-66.8335						37.25	-62.8357
37.3	-63.5376						37.3	-65.5212				37.3	-67.1387						37.3	-62.7136
37.35	-63.2324						37.35	-65.3381				37.35	-68.0542						37.35	-62.7441
37.4	-63.385						37.4	-65.2771				37.4	-66.2231						37.4	-62.5915
37.45	-63.5376						37.45	-65.6433				37.45	-69.2749						37.45	-62.4084
37.5	-63.3545						37.5	-65.4297				37.5	-65.3076						37.5	-62.6831
37.55	-63.3545						37.55	-65.2466				37.55	-67.1387						37.55	-62.8967
37.6	-63.5681						37.6	-65.5518				37.6	-67.4438						37.6	-62.8052
37.65	-63.385						37.65	-65.5823				37.65	-66.2231						37.65	-62.8357
37.7	-63.1409						37.7	-65.2771				37.7	-68.6646						37.7	-62.7136
37.75	-63.5071						37.75	-65.6128				37.75	-65.3076						37.75	-62.6221
37.8	-63.446						37.8	-65.4907				37.8	-66.8335						37.8	-62.439
37.85	-63.2935						37.85	-65.3381				37.85	-67.749						37.85	-62.6221
37.9	-63.2935						37.9	-65.7043				37.9	-65.918						37.9	-62.8052
37.95	-63.5681						37.95	-65.5823				37.95	-68.6646						37.95	-62.8662
38	-63.385						38	-65.3076				38	-65.6128						38	-62.7441
38.05	-63.1409						38.05	-65.6738				38.05	-67.4438						38.05	-62.7441
38.1	-63.385						38.1	-65.6433				38.1	-68.0542						38.1	-62.6221
38.15	-63.5376						38.15	-65.3076				38.15	-65.918						38.15	-62.4695
38.2	-63.3545						38.2	-65.3992				38.2	-68.3594						38.2	-62.439
38.25	-63.1409						38.25	-65.7349				38.25	-65.918						38.25	-62.7747
38.3	-63.5071						38.3	-65.7043				38.3	-67.1387						38.3	-62.8662
38.35	-63.5071						38.35	-65.2466				38.35	-67.749						38.35	-62.8052
38.4	-63.1714						38.4	-65.5518				38.4	-65.6128						38.4	-62.6831
38.45	-63.1103						38.45	-65.6128				38.45	-66.5283						38.45	-62.5915
38.5	-63.446						38.5	-65.5518				38.5	-67.749						38.5	-62.6221
38.55	-63.446						38.55	-65.2466				38.55	-65.918						38.55	-62.4084
38.6	-63.1714						38.6	-65.6128				38.6	-68.0542						38.6	-62.439
38.65	-63.1409						38.65	-65.7043				38.65	-65.918						38.65	-62.6526
38.7	-63.4766						38.7	-65.6128				38.7	-67.749						38.7	-62.7747
38.75	-63.4766						38.75	-65.2771				38.75	-68.3594						38.75	-62.7747
38.8	-63.2324						38.8	-65.7043				38.8	-65.918						38.8	-62.7136
38.85	-63.0798						38.85	-65.7654				38.85	-66.8335						38.85	-62.7441
38.9	-63.4766						38.9	-65.7043				38.9	-68.0542						38.9	-62.6526
38.95	-63.4155						38.95	-65.3381				38.95	-66.2231						38.95	-62.5305
39	-63.1714						39	-65.6433				39	-68.3594						39	-62.4084
39.05	-63.0798						39.05	-65.8264				39.05	-65.3076						39.05	-62.2559
39.1	-63.4155						39.1	-65.8264				39.1	-67.1387						39.1	-62.5
39.15	-63.3545						39.15	-65.4297				39.15	-68.3594						39.15	-62.561
39.2	-63.2324						39.2	-65.5518				39.2	-65.6128						39.2	-62.7136
39.25	-63.0188						39.25	-65.8569				39.25	-67.4438						39.25	-62.6221
39.3	-63.3545						39.3	-65.7654				39.3	-68.3594						39.3	-62.5915
39.35	-63.4155						39.35	-65.5823				39.35	-65.6128						39.35	-62.561
39.4	-63.3545						39.4	-65.5518				39.4	-67.4438						39.4	-62.5
39.45	-63.0188						39.45	-65.7959				39.45	-68.0542						39.45	-62.4695
39.5	-63.2629						39.5	-65.8874				39.5	-65.6128						39.5	-62.3474
39.55	-63.4155						39.55	-65.7349				39.55	-68.6646						39.55	-62.2864
39.6	-63.4766						39.6	-65.5823				39.6	-67.749						39.6	-62.2559
39.65	-63.2019						39.65	-65.5212				39.65	-65.6128						39.65	-62.4084
39.7	-63.0493						39.7	-65.7349				39.7	-68.0542						39.7	-62.561
39.75	-63.385						39.75	-65.7043				39.75	-67.749						39.75	-62.5915
39.8	-63.446						39.8	-65.7043				39.8	-65.6128						39.8	-62.561
39.85	-63.3545						39.85	-65.4602				39.85	-68.3594						39.85	-62.3169
39.9	-63.0798						39.9	-65.4907				39.9	-66.5283						39.9	-62.1033
39.95	-63.2019						39.95	-65.7654				39.95	-66.8335						39.95	-62.4695
40	-63.4155						40	-65.7654				40	-67.749						40	-62.5305
40.05	-63.385						40.05	-65.7043				40.05	-67.749						40.05	-62.5
40.1	-63.2324						40.1	-65.3992				40.1	-67.1387						40.1	-62.2253
40.15	-63.0188						40.15	-65.5518				40.15	-68.3594						40.15	-62.3474
40.2	-63.2935						40.2	-65.8264				40.2	-66.8335						40.2	-62.5305
40.25	-63.5376						40.25	-65.7654				40.25	-65.918						40.25	-62.4084
40.3	-63.2935						40.3	-65.7349				40.3	-69.2749						40.3	-62.1033
40.35	-63.2935						40.35	-65.6128				40.35	-65.3076						40.35	-62.5915
40.4	-63.1409						40.4	-65.4907				40.4	-66.8335						40.4	-62.5
40.45	-63.2935						40.45	-65.7959				40.45	-68.6646						40.45	-62.1643
40.5	-63.385						40.5	-65.9485				40.5	-65.918						40.5	-62.6221
40.55	-63.5071						40.55	-65.8874				40.55	-67.749						40.55	-62.4695
40.6	-63.3545						40.6	-65.6128				40.6	-66.2231						40.6	-62.1033
40.65	-63.1714						40.65	-65.5518				40.65	-66.8335						40.65	-62.5
40.7	-63.1714						40.7	-65.7043				40.7	-67.749						40.7	-62.3779
40.75	-63.5376						40.75	-65.918				40.75	-66.8335						40.75	-62.2253
40.8	-63.5681						40.8	-65.9485				40.8	-67.4438						40.8	-62.561
40.85	-63.5071						40.85	-65.8874				40.85	-66.5283						40.85	-62.2864
40.9	-63.2629						40.9	-65.7349				40.9	-67.749						40.9	-62.2559
40.95	-63.2629						40.95	-65.7043				40.95	-66.5283						40.95	-62.561
41	-63.5071						41	-65.8569				41	-68.0542						41	-62.2864
41.05	-63.6291						41.05	-66.04				41.05	-66.2231						41.05	-62.5
41.1	-63.5376						41.1	-66.0095				41.1	-67.4438						41.1	-62.5305
41.15	-63.5376						41.15	-66.04				41.15	-66.8335						41.15	-62.1643
41.2	-63.2324						41.2	-65.8569				41.2	-66.5283						41.2	-62.561
41.25	-63.2324						41.25	-65.6433				41.25	-67.4438						41.25	-62.561
41.3	-63.5071						41.3	-65.8874				41.3	-65.6128						41.3	-62.1338
41.35	-63.6902						41.35	-66.1316				41.35	-68.0542						41.35	-62.5915
41.4	-63.5986						41.4	-66.1316				41.4	-65.0024						41.4	-62.561
41.45	-63.4766						41.45	-66.04				41.45	-68.3594						41.45	-62.1643
41.5	-63.2629						41.5	-65.979				41.5	-65.6128						41.5	-62.5
41.55	-63.324						41.55	-65.7654				41.55	-68.0542						41.55	-62.5305
41.6	-63.5376						41.6	-65.7959				41.6	-66.2231						41.6	-62.2864
41.65	-63.6291						41.65	-66.0095				41.65	-67.4438						41.65	-62.3474
41.7	-63.5376						41.7	-66.1621				41.7	-66.8335						41.7	-62.561
41.75	-63.5681						41.75	-65.979				41.75	-65.6128						41.75	-62.4084
41.8	-63.385						41.8	-66.0095				41.8	-68.0542						41.8	-62.2253
41.85	-63.1714						41.85	-65.8569				41.85	-66.2231						41.85	-62.561
41.9	-63.2935						41.9	-65.7654				41.9	-68.0542						41.9	-62.5
41.95	-63.5681						41.95	-65.7654				41.95	-66.5283						41.95	-62.2253
42	-63.6597						42	-65.9485				42	-68.6646						42	-62.5
42.05	-63.5376						42.05	-65.979				42.05	-66.5283						42.05	-62.6221
42.1	-63.4155						42.1	-66.0705				42.1	-66.8335						42.1	-62.3779
42.15	-63.4155						42.15	-65.9485				42.15	-68.0542						42.15	-62.2253
42.2	-63.2019						42.2	-66.0095				42.2	-66.2231						42.2	-62.6526
42.25	-63.2019						42.25	-65.7654				42.25	-67.4438						42.25	-62.5305
42.3	-63.5681						42.3	-65.7654				42.3	-65.3076						42.3	-62.3779
42.35	-63.6291						42.35	-65.7349				42.35	-68.0542						42.35	-62.3169
42.4	-63.5071						42.4	-65.8874				42.4	-65.6128						42.4	-62.6221
42.45	-63.5681						42.45	-66.04				42.45	-68.0542						42.45	-62.561
42.5	-63.385						42.5	-66.04				42.5	-65.3076						42.5	-62.2559
42.55	-63.2629						42.55	-66.0095				42.55	-68.9697						42.55	-62.3779
42.6	-63.2324						42.6	-65.8874				42.6	-65.6128						42.6	-62.6221
42.65	-63.3545						42.65	-65.7959				42.65	-68.3594						42.65	-62.439
42.7	-63.5071						42.7	-65.8264				42.7	-65.918						42.7	-62.1643
42.75	-63.6291						42.75	-65.6128				42.75	-68.3594						42.75	-62.3474
42.8	-63.5986						42.8	-65.6738				42.8	-65.918						42.8	-62.5915
42.85	-63.5681						42.85	-65.7349				42.85	-67.4438						42.85	-62.4695
42.9	-63.4155						42.9	-65.8874				42.9	-66.2231						42.9	-62.2253
42.95	-63.3545						42.95	-65.8874				42.95	-67.749						42.95	-62.3779
43	-63.1714						43	-65.7959				43	-67.1387						43	-62.5915
43.05	-63.2935						43.05	-65.7654				43.05	-67.1387						43.05	-62.439
43.1	-63.385						43.1	-65.7043				43.1	-67.749						43.1	-62.2253
43.15	-63.5376						43.15	-65.7043				43.15	-67.1387						43.15	-62.2559
43.2	-63.6291						43.2	-65.4907				43.2	-68.0542						43.2	-62.5
43.25	-63.5071						43.25	-65.3686				43.25	-66.5283						43.25	-62.439
43.3	-63.4155						43.3	-65.4602				43.3	-68.6646						43.3	-62.2864
43.35	-63.446						43.35	-65.5823				43.35	-65.918						43.35	-62.2253
43.4	-63.4155						43.4	-65.6128				43.4	-68.9697						43.4	-62.561
43.45	-63.385						43.45	-65.7349				43.45	-65.3076						43.45	-62.5
43.5	-63.2324						43.5	-65.7654				43.5	-68.9697						43.5	-62.3474
43.55	-63.2935						43.55	-65.7654				43.55	-65.0024						43.55	-62.1338
43.6	-63.5376						43.6	-65.6128				43.6	-68.3594						43.6	-62.439
43.65	-63.6597						43.65	-65.6128				43.65	-66.2231						43.65	-62.5915
43.7	-63.5681						43.7	-65.6433				43.7	-67.749						43.7	-62.5305
43.75	-63.5376						43.75	-65.4907				43.75	-67.1387						43.75	-62.2864
43.8	-63.4766						43.8	-65.3381				43.8	-66.8335						43.8	-62.2559
43.85	-63.2629						43.85	-65.3076				43.85	-68.0542						43.85	-62.561
43.9	-63.446						43.9	-65.3076				43.9	-66.8335						43.9	-62.439
43.95	-63.5681						43.95	-65.2771				43.95	-68.6646						43.95	-62.4695
44	-63.6291						44	-65.4297				44	-65.918						44	-62.1643
44.05	-63.3545						44.05	-65.3992				44.05	-68.6646						44.05	-62.3169
44.1	-63.5071						44.1	-65.5823				44.1	-65.0024						44.1	-62.6221
44.15	-63.6597						44.15	-65.6128				44.15	-68.3594						44.15	-62.4084
44.2	-63.5986						44.2	-65.5518				44.2	-65.3076						44.2	-62.439
44.25	-63.2629						44.25	-65.4907				44.25	-67.749						44.25	-62.1338
44.3	-63.6902						44.3	-65.5212				44.3	-66.5283						44.3	-62.3779
44.35	-63.5986						44.35	-65.5212				44.35	-68.3594						44.35	-62.5305
44.4	-63.2324						44.4	-65.4297				44.4	-68.3594						44.4	-62.6221
44.45	-63.6902						44.45	-65.4297				44.45	-66.5283						44.45	-62.439
44.5	-63.6291						44.5	-65.4907				44.5	-68.3594						44.5	-62.1948
44.55	-63.324						44.55	-65.3076				44.55	-65.3076						44.55	-62.3169
44.6	-63.6902						44.6	-65.3381				44.6	-68.6646						44.6	-62.6221
44.65	-63.5986						44.65	-65.1855				44.65	-65.918						44.65	-62.439
44.7	-63.324						44.7	-65.094				44.7	-68.0542						44.7	-62.439
44.75	-63.6291						44.75	-65.155				44.75	-67.4438						44.75	-62.1338
44.8	-63.446						44.8	-65.2466				44.8	-67.1387						44.8	-62.3169
44.85	-63.5986						44.85	-65.3381				44.85	-67.749						44.85	-62.5915
44.9	-63.5681						44.9	-65.3686				44.9	-66.2231						44.9	-62.5
44.95	-63.2935						44.95	-65.2771				44.95	-68.9697						44.95	-62.4084
45	-63.6597						45	-65.2466				45	-65.6128						45	-62.3474
45.05	-63.5681						45.05	-64.9719				45.05	-68.3594						45.05	-62.1033
45.1	-63.2324						45.1	-65.033				45.1	-66.2231						45.1	-62.3779
45.15	-63.7207						45.15	-65.3076				45.15	-67.1387						45.15	-62.4084
45.2	-63.4766						45.2	-65.2161				45.2	-69.2749						45.2	-62.4695
45.25	-63.4766						45.25	-65.033				45.25	-66.8335						45.25	-62.4084
45.3	-63.5986						45.3	-64.8498				45.3	-69.5801						45.3	-62.1643
45.35	-63.4155						45.35	-65.1855				45.35	-65.0024						45.35	-62.0422
45.4	-63.446						45.4	-65.094				45.4	-68.6646						45.4	-62.439
45.45	-63.6597						45.45	-64.8804				45.45	-66.2231						45.45	-62.5
45.5	-63.385						45.5	-64.9414				45.5	-67.4438						45.5	-62.3779
45.55	-63.385						45.55	-65.155				45.55	-68.3594						45.55	-62.3169
45.6	-63.6291						45.6	-64.9719				45.6	-66.8335						45.6	-62.2253
45.65	-63.4766						45.65	-64.8193				45.65	-68.9697						45.65	-62.1033
45.7	-63.2935						45.7	-65.0635				45.7	-66.2231						45.7	-62.2559
45.75	-63.6291						45.75	-65.0024				45.75	-67.1387						45.75	-62.4084
45.8	-63.5986						45.8	-64.6973				45.8	-68.6646						45.8	-62.4695
45.85	-63.2019						45.85	-65.0635				45.85	-66.8335						45.85	-62.3779
45.9	-63.6597						45.9	-64.9109				45.9	-68.6646						45.9	-62.3169
45.95	-63.5681						45.95	-64.6362				45.95	-65.918						45.95	-62.1033
46	-63.4155						46	-65.0635				46	-68.6646						46	-62.2253
46.05	-63.4155						46.05	-64.8804				46.05	-69.2749						46.05	-62.439
46.1	-63.6597						46.1	-64.5447				46.1	-66.8335						46.1	-62.4695
46.15	-63.5071						46.15	-65.033				46.15	-68.6646						46.15	-62.5
46.2	-63.2629						46.2	-65.0024				46.2	-65.918						46.2	-62.439
46.25	-63.5986						46.25	-64.5752				46.25	-68.3594						46.25	-62.3779
46.3	-63.6291						46.3	-64.9109				46.3	-67.4438						46.3	-62.2559
46.35	-63.4155						46.35	-64.9719				46.35	-67.1387						46.35	-62.1643
46.4	-63.2935						46.4	-64.6057				46.4	-69.5801						46.4	-62.439
46.45	-63.6902						46.45	-64.8193				46.45	-66.5283						46.45	-62.5305
46.5	-63.6902						46.5	-64.9109				46.5	-67.749						46.5	-62.4695
46.55	-63.2629						46.55	-64.9109				46.55	-67.749						46.55	-62.4695
46.6	-63.446						46.6	-64.5142				46.6	-67.4438						46.6	-62.439
46.65	-63.7207						46.65	-64.8498				46.65	-69.2749						46.65	-62.2864
46.7	-63.5986						46.7	-64.8498				46.7	-66.2231						46.7	-62.0728
46.75	-63.1714						46.75	-64.7278				46.75	-69.2749						46.75	-62.1643
46.8	-63.5376						46.8	-64.6667				46.8	-66.5283						46.8	-62.3779
46.85	-63.6597						46.85	-65.0024				46.85	-69.5801						46.85	-62.5
46.9	-63.5071						46.9	-64.8804				46.9	-65.918						46.9	-62.4695
46.95	-63.2324						46.95	-64.6057				46.95	-68.6646						46.95	-62.4695
47	-63.5376						47	-64.8498				47	-66.5283						47	-62.4695
47.05	-63.7207						47.05	-64.9719				47.05	-68.3594						47.05	-62.4084
47.1	-63.5681						47.1	-65.0024				47.1	-66.2231						47.1	-62.1643
47.15	-63.2324						47.15	-64.7278				47.15	-68.0542						47.15	-62.1033
47.2	-63.5681						47.2	-64.8193				47.2	-66.8335						47.2	-62.2253
47.25	-63.7207						47.25	-65.0635				47.25	-68.6646						47.25	-62.4695
47.3	-63.5681						47.3	-65.0024				47.3	-68.9697						47.3	-62.4084
47.35	-63.3545						47.35	-64.8498				47.35	-67.1387						47.35	-62.5
47.4	-63.5071						47.4	-64.7888				47.4	-69.2749						47.4	-62.4695
47.45	-63.7817						47.45	-65.0024				47.45	-67.1387						47.45	-62.561
47.5	-63.6291						47.5	-65.0024				47.5	-68.9697						47.5	-62.4084
47.55	-63.4155						47.55	-65.0635				47.55	-66.8335						47.55	-62.3474
47.6	-63.5071						47.6	-64.7888				47.6	-69.5801						47.6	-62.3474
47.65	-63.8123						47.65	-64.9719				47.65	-65.918						47.65	-62.1643
47.7	-63.8428						47.7	-65.155				47.7	-68.3594						47.7	-62.2253
47.75	-63.5071						47.75	-65.094				47.75	-66.8335						47.75	-62.2253
47.8	-63.446						47.8	-65.0024				47.8	-68.3594						47.8	-62.4695
47.85	-63.7817						47.85	-64.7583				47.85	-68.9697						47.85	-62.561
47.9	-63.7817						47.9	-65.155				47.9	-67.1387						47.9	-62.5
47.95	-63.5681						47.95	-65.1855				47.95	-68.6646						47.95	-62.4695
48	-63.4155						48	-65.1245				48	-66.2231						48	-62.5
48.05	-63.6597						48.05	-64.8193				48.05	-68.3594						48.05	-62.3474
48.1	-63.8123						48.1	-65.094				48.1	-68.0542						48.1	-62.2253
48.15	-63.7512						48.15	-65.2771				48.15	-67.1387						48.15	-62.3474
48.2	-63.5071						48.2	-65.2466				48.2	-68.9697						48.2	-62.5915
48.25	-63.3545						48.25	-65.094				48.25	-66.5283						48.25	-62.561
48.3	-63.8123						48.3	-64.8498				48.3	-68.0542						48.3	-62.4084
48.35	-63.6902						48.35	-65.155				48.35	-67.1387						48.35	-62.0728
48.4	-63.6597						48.4	-65.3992				48.4	-66.2231						48.4	-62.3474
48.45	-63.385						48.45	-65.1855				48.45	-69.5801						48.45	-62.5
48.5	-63.5071						48.5	-65.1245				48.5	-65.6128						48.5	-62.3169
48.55	-63.6902						48.55	-65.0024				48.55	-67.749						48.55	-61.9507
48.6	-63.6902						48.6	-65.0635				48.6	-67.749						48.6	-62.4695
48.65	-63.6291						48.65	-65.2771				48.65	-67.1387						48.65	-62.3169
48.7	-63.324						48.7	-65.2771				48.7	-68.9697						48.7	-62.0728
48.75	-63.2935						48.75	-65.3076				48.75	-65.918						48.75	-62.3169
48.8	-63.6291						48.8	-65.033				48.8	-67.4438						48.8	-62.3474
48.85	-63.6597						48.85	-65.0635				48.85	-68.6646						48.85	-62.0422
48.9	-63.6291						48.9	-65.2466				48.9	-67.4438						48.9	-62.3474
48.95	-63.2935						48.95	-65.3992				48.95	-68.6646						48.95	-62.3474
49	-63.2324						49	-65.2466				49	-66.2231						49	-61.9202
49.05	-63.5376						49.05	-65.2161				49.05	-69.5801						49.05	-62.3169
49.1	-63.6597						49.1	-64.9719				49.1	-66.8335						49.1	-62.3169
49.15	-63.5681						49.15	-65.1855				49.15	-68.9697						49.15	-61.8896
49.2	-63.3545						49.2	-65.4297				49.2	-66.5283						49.2	-62.3169
49.25	-63.2324						49.25	-65.3992				49.25	-69.5801						49.25	-62.2559
49.3	-63.4155						49.3	-65.3381				49.3	-68.0542						49.3	-62.0422
49.35	-63.6291						49.35	-65.2161				49.35	-67.749						49.35	-62.3474
49.4	-63.446						49.4	-65.0635				49.4	-66.8335						49.4	-62.1338
49.45	-63.5071						49.45	-65.3076				49.45	-67.4438						49.45	-62.2559
49.5	-63.3545						49.5	-65.3992				49.5	-68.6646						49.5	-62.4084
49.55	-63.2935						49.55	-65.4602				49.55	-66.5283						49.55	-61.9507
49.6	-63.4155						49.6	-65.3381				49.6	-69.2749						49.6	-62.2253
49.65	-63.5376						49.65	-65.3686				49.65	-67.1387						49.65	-62.3169
49.7	-63.5071						49.7	-65.094				49.7	-69.2749						49.7	-61.9202
49.75	-63.446						49.75	-65.3381				49.75	-68.0542						49.75	-62.3779
49.8	-63.2935						49.8	-65.4602				49.8	-66.5283						49.8	-62.2864
49.85	-63.1103						49.85	-65.5518				49.85	-68.6646						49.85	-61.9812
49.9	-63.2935						49.9	-65.4297				49.9	-67.1387						49.9	-62.3474
49.95	-63.5376						49.95	-65.3992				49.95	-68.9697						49.95	-62.3169
50	-63.4766						50	-65.3686				50	-66.8335						50	-62.1033
50.05	-63.446						50.05	-65.3076				50.05	-66.8335						50.05	-62.2864
50.1	-63.2629						50.1	-65.3686				50.1	-68.9697						50.1	-62.3169
50.15	-63.1409						50.15	-65.5518				50.15	-66.2231						50.15	-62.1338
50.2	-63.1714						50.2	-65.6738				50.2	-69.8853						50.2	-61.9812
50.25	-63.3545						50.25	-65.6128				50.25	-66.8335						50.25	-62.3779
50.3	-63.4766						50.3	-65.5823				50.3	-68.6646						50.3	-62.3169
50.35	-63.385						50.35	-65.3992				50.35	-68.3594						50.35	-61.9202
50.4	-63.3545						50.4	-65.3076				50.4	-66.5283						50.4	-62.0728
50.45	-63.1714						50.45	-65.3992				50.45	-69.2749						50.45	-62.3474
50.5	-63.0188						50.5	-65.5518				50.5	-67.1387						50.5	-62.1643
50.55	-63.2019						50.55	-65.6738				50.55	-68.3594						50.55	-61.9202
50.6	-63.3545						50.6	-65.7959				50.6	-67.749						50.6	-62.2864
50.65	-63.4155						50.65	-65.7043				50.65	-68.9697						50.65	-62.2559
50.7	-63.4155						50.7	-65.5823				50.7	-68.6646						50.7	-62.0728
50.75	-63.385						50.75	-65.4907				50.75	-66.5283						50.75	-62.0422
50.8	-63.2324						50.8	-65.4297				50.8	-68.0542						50.8	-62.2864
50.85	-63.2019						50.85	-65.4297				50.85	-67.1387						50.85	-62.3169
50.9	-63.0493						50.9	-65.7043				50.9	-68.6646						50.9	-62.0117
50.95	-63.2324						50.95	-65.7654				50.95	-65.6128						50.95	-62.1948
51	-63.3545						51	-65.8569				51	-68.6646						51	-62.2559
51.05	-63.385						51.05	-65.7043				51.05	-66.2231						51.05	-62.1643
51.1	-63.385						51.1	-65.6433				51.1	-68.6646						51.1	-61.8896
51.15	-63.385						51.15	-65.5823				51.15	-67.1387						51.15	-62.0728
51.2	-63.2629						51.2	-65.6128				51.2	-68.6646						51.2	-62.1338
51.25	-63.2019						51.25	-65.5212				51.25	-66.8335						51.25	-62.1033
51.3	-63.0798						51.3	-65.4907				51.3	-68.6646						51.3	-61.7371
51.35	-63.1409						51.35	-65.6128				51.35	-67.1387						51.35	-62.0728
51.4	-63.2324						51.4	-65.7959				51.4	-68.3594						51.4	-62.1643
51.45	-63.446						51.45	-65.8569				51.45	-66.8335						51.45	-62.0422
51.5	-63.385						51.5	-65.7959				51.5	-68.3594						51.5	-61.7676
51.55	-63.446						51.55	-65.7043				51.55	-66.8335						51.55	-62.0422
51.6	-63.324						51.6	-65.7959				51.6	-67.749						51.6	-62.0422
51.65	-63.324						51.65	-65.7349				51.65	-66.5283						51.65	-62.0422
51.7	-63.2324						51.7	-65.5212				51.7	-68.6646						51.7	-61.7676
51.75	-63.2324						51.75	-65.6128				51.75	-67.1387						51.75	-61.9507
51.8	-63.0188						51.8	-65.4297				51.8	-68.3594						51.8	-62.1033
51.85	-63.1409						51.85	-65.5518				51.85	-66.8335						51.85	-62.0117
51.9	-63.385						51.9	-65.6128				51.9	-68.9697						51.9	-61.8286
51.95	-63.5376						51.95	-65.8264				51.95	-66.8335						51.95	-61.7065
52	-63.385						52	-65.7349				52	-68.3594						52	-62.0728
52.05	-63.385						52.05	-65.8569				52.05	-65.918						52.05	-62.0422
52.1	-63.2935						52.1	-65.7349				52.1	-69.5801						52.1	-61.8286
52.15	-63.1103						52.15	-65.7654				52.15	-66.5283						52.15	-61.6455
52.2	-63.2019						52.2	-65.8264				52.2	-68.6646						52.2	-61.8591
52.25	-63.446						52.25	-65.7349				52.25	-65.6128						52.25	-62.0728
52.3	-63.3545						52.3	-65.7043				52.3	-69.2749						52.3	-61.9507
52.35	-63.1714						52.35	-65.6433				52.35	-66.8335						52.35	-61.7676
52.4	-63.0493						52.4	-65.5823				52.4	-68.0542						52.4	-61.7065
52.45	-63.4155						52.45	-65.5212				52.45	-65.918						52.45	-62.0117
52.5	-63.385						52.5	-65.3992				52.5	-68.9697						52.5	-61.8896
52.55	-63.0188						52.55	-65.4907				52.55	-66.5283						52.55	-61.7981
52.6	-63.2324						52.6	-65.6128				52.6	-69.2749						52.6	-61.615
52.65	-63.385						52.65	-65.5823				52.65	-65.918						52.65	-61.7676
52.7	-63.1409						52.7	-65.7043				52.7	-68.9697						52.7	-62.0422
52.75	-63.2324						52.75	-65.7959				52.75	-66.5283						52.75	-61.9507
52.8	-63.4155						52.8	-65.7959				52.8	-68.3594						52.8	-61.8591
52.85	-63.1714						52.85	-65.7654				52.85	-65.918						52.85	-61.615
52.9	-63.2019						52.9	-65.6433				52.9	-68.3594						52.9	-61.8591
52.95	-63.324						52.95	-65.7043				52.95	-66.5283						52.95	-62.0117
53	-63.0493						53	-65.7654				53	-66.8335						53	-61.9202
53.05	-63.2935						53.05	-65.7654				53.05	-66.5283						53.05	-61.7676
53.1	-63.2935						53.1	-65.5518				53.1	-68.3594						53.1	-61.676
53.15	-62.9578						53.15	-65.4602				53.15	-68.3594						53.15	-61.7371
53.2	-63.4155						53.2	-65.3381				53.2	-67.1387						53.2	-61.9812
53.25	-63.2019						53.25	-65.4297				53.25	-68.0542						53.25	-61.8286
53.3	-63.0188						53.3	-65.7043				53.3	-67.749						53.3	-61.9202
53.35	-63.4155						53.35	-65.6738				53.35	-69.2749						53.35	-61.7371
53.4	-62.9578						53.4	-65.7043				53.4	-66.2231						53.4	-61.6455
53.45	-63.2935						53.45	-65.4907				53.45	-68.3594						53.45	-61.9507
53.5	-63.3545						53.5	-65.3076				53.5	-65.918						53.5	-62.0117
53.55	-62.9578						53.55	-65.6433				53.55	-68.9697						53.55	-61.9507
53.6	-63.446						53.6	-65.6128				53.6	-65.0024						53.6	-61.8591
53.65	-63.385						53.65	-65.4602				53.65	-68.0542						53.65	-61.5845
53.7	-62.9883						53.7	-65.2466				53.7	-66.8335						53.7	-61.7981
53.75	-63.4766						53.75	-65.5518				53.75	-68.0542						53.75	-62.0728
53.8	-63.385						53.8	-65.5823				53.8	-67.1387						53.8	-62.1338
53.85	-63.0188						53.85	-65.1855				53.85	-67.749						53.85	-61.9812
53.9	-63.446						53.9	-65.5823				53.9	-69.2749						53.9	-62.0117
53.95	-63.5071						53.95	-65.4907				53.95	-65.918						53.95	-61.7371
54	-63.0798						54	-65.3076				54	-68.0542						54	-61.8896
54.05	-63.446						54.05	-65.4297				54.05	-65.6128						54.05	-62.1033
54.1	-63.446						54.1	-65.6128				54.1	-68.6646						54.1	-62.2253
54.15	-63.1409						54.15	-65.3686				54.15	-64.3921						54.15	-62.1338
54.2	-63.385						54.2	-65.3686				54.2	-67.749						54.2	-61.9812
54.25	-63.5376						54.25	-65.5518				54.25	-65.6128						54.25	-61.8591
54.3	-63.2935						54.3	-65.4297				54.3	-67.4438						54.3	-61.8591
54.35	-63.2629						54.35	-65.3992				54.35	-67.4438						54.35	-62.0728
54.4	-63.5071						54.4	-65.5823				54.4	-67.1387						54.4	-62.1338
54.45	-63.4766						54.45	-65.3992				54.45	-68.9697						54.45	-62.1033
54.5	-63.1409						54.5	-65.3686				54.5	-65.918						54.5	-62.1033
54.55	-63.446						54.55	-65.6128				54.55	-68.3594						54.55	-61.9812
54.6	-63.5681						54.6	-65.3992				54.6	-65.6128						54.6	-61.7981
54.65	-63.3545						54.65	-65.2466				54.65	-66.5283						54.65	-61.9507
54.7	-63.2324						54.7	-65.6433				54.7	-67.4438						54.7	-62.1643
54.75	-63.6291						54.75	-65.4602				54.75	-66.2231						54.75	-62.3779
54.8	-63.5071						54.8	-65.1855				54.8	-68.9697						54.8	-62.1643
54.85	-63.324						54.85	-65.5823				54.85	-64.6973						54.85	-62.1643
54.9	-63.2935						54.9	-65.6128				54.9	-67.1387						54.9	-62.0728
54.95	-63.6902						54.95	-65.4602				54.95	-66.8335						54.95	-62.0728
55	-63.5376						55	-65.3076				55	-67.4438						55	-61.8286
55.05	-63.1714						55.05	-65.7349				55.05	-67.1387						55.05	-62.1033
55.1	-63.446						55.1	-65.6433				55.1	-65.6128						55.1	-62.2253
55.15	-63.7207						55.15	-65.2771				55.15	-68.3594						55.15	-62.2864
55.2	-63.5376						55.2	-65.4602				55.2	-65.6128						55.2	-62.1643
55.25	-63.2019						55.25	-65.7349				55.25	-67.1387						55.25	-62.1948
55.3	-63.5376						55.3	-65.6433				55.3	-66.5283						55.3	-62.0728
55.35	-63.6597						55.35	-65.4297				55.35	-67.4438						55.35	-62.0422
55.4	-63.5376						55.4	-65.5823				55.4	-68.6646						55.4	-61.8286
55.45	-63.2019						55.45	-65.8264				55.45	-65.6128						55.45	-62.1033
55.5	-63.6597						55.5	-65.8569				55.5	-66.5283						55.5	-62.2559
55.55	-63.7207						55.55	-65.5212				55.55	-67.1387						55.55	-62.3474
55.6	-63.5376						55.6	-65.5823				55.6	-67.1387						55.6	-62.1643
55.65	-63.2324						55.65	-65.918				55.65	-68.6646						55.65	-62.2253
55.7	-63.6291						55.7	-65.8569				55.7	-65.0024						55.7	-62.2253
55.75	-63.7207						55.75	-65.7043				55.75	-68.6646						55.75	-62.0728
55.8	-63.6597						55.8	-65.5823				55.8	-67.1387						55.8	-61.9507
55.85	-63.2324						55.85	-65.979				55.85	-67.1387						55.85	-61.8896
55.9	-63.6291						55.9	-65.9485				55.9	-68.3594						55.9	-61.9507
55.95	-63.8123						55.95	-65.8874				55.95	-65.0024						55.95	-62.1643
56	-63.7512						56	-65.5823				56	-67.749						56	-62.1948
56.05	-63.5071						56.05	-65.8874				56.05	-67.1387						56.05	-62.2253
56.1	-63.5071						56.1	-66.0705				56.1	-66.8335						56.1	-62.1643
56.15	-63.8733						56.15	-65.9485				56.15	-68.6646						56.15	-62.1948
56.2	-63.7512						56.2	-65.7043				56.2	-66.2231						56.2	-62.1338
56.25	-63.6291						56.25	-65.7043				56.25	-66.8335						56.25	-62.0117
56.3	-63.4766						56.3	-66.1011				56.3	-68.3594						56.3	-61.9202
56.35	-63.8123						56.35	-66.0095				56.35	-65.918						56.35	-61.8591
56.4	-63.8428						56.4	-65.9485				56.4	-68.0542						56.4	-62.0422
56.45	-63.8123						56.45	-65.7654				56.45	-66.2231						56.45	-62.1643
56.5	-63.5681						56.5	-65.918				56.5	-66.2231						56.5	-62.1948
56.55	-63.6291						56.55	-66.0095				56.55	-68.0542						56.55	-62.1033
56.6	-63.9343						56.6	-66.0095				56.6	-65.918						56.6	-61.8286
56.65	-63.9343						56.65	-65.9485				56.65	-67.4438						56.65	-61.9507
56.7	-63.7207						56.7	-65.7349				56.7	-68.3594						56.7	-62.2253
56.75	-63.4766						56.75	-65.8569				56.75	-65.6128						56.75	-62.1338
56.8	-63.7817						56.8	-66.1926				56.8	-67.749						56.8	-61.9507
56.85	-63.9648						56.85	-66.0095				56.85	-65.6128						56.85	-61.9507
56.9	-63.8428						56.9	-66.0095				56.9	-66.2231						56.9	-62.0728
56.95	-63.6597						56.95	-65.7654				56.95	-68.0542						56.95	-62.0728
57	-63.5376						57	-65.8264				57	-65.0024						57	-61.8896
57.05	-63.8733						57.05	-66.1316				57.05	-67.4438						57.05	-62.1643
57.1	-63.9648						57.1	-66.0705				57.1	-65.918						57.1	-62.1643
57.15	-63.8428						57.15	-65.979				57.15	-67.1387						57.15	-61.8591
57.2	-63.8123						57.2	-65.8569				57.2	-67.4438						57.2	-62.1948
57.25	-63.5986						57.25	-65.8569				57.25	-66.2231						57.25	-62.0728
57.3	-63.9038						57.3	-66.1011				57.3	-67.749						57.3	-61.8591
57.35	-64.0259						57.35	-66.1621				57.35	-66.8335						57.35	-62.2864
57.4	-64.1174						57.4	-66.04				57.4	-68.3594						57.4	-62.1338
57.45	-63.9343						57.45	-66.04				57.45	-65.918						57.45	-62.0422
57.5	-63.7207						57.5	-65.7043				57.5	-67.4438						57.5	-62.1643
57.55	-63.8123						57.55	-65.8874				57.55	-66.8335						57.55	-61.9812
57.6	-64.209						57.6	-66.1926				57.6	-66.8335						57.6	-62.1948
57.65	-64.0564						57.65	-66.1316				57.65	-66.5283						57.65	-62.1948
57.7	-64.1174						57.7	-66.1316				57.7	-65.0024						57.7	-61.8896
57.75	-63.9038						57.75	-65.9485				57.75	-67.1387						57.75	-62.3474
57.8	-63.7817						57.8	-65.7043				57.8	-65.0024						57.8	-62.2559
57.85	-64.0259						57.85	-65.8569				57.85	-68.6646						57.85	-61.8591
57.9	-64.209						57.9	-66.1621				57.9	-65.3076						57.9	-62.3169
57.95	-64.1174						57.95	-66.1926				57.95	-67.1387						57.95	-62.1948
58	-64.1479						58	-66.0095				58	-67.1387						58	-62.0117
58.05	-63.9648						58.05	-65.918				58.05	-65.3076						58.05	-62.2864
58.1	-63.8733						58.1	-65.7654				58.1	-68.0542						58.1	-62.1643
58.15	-64.0869						58.15	-65.8264				58.15	-64.0869						58.15	-62.0117
58.2	-64.331						58.2	-65.918				58.2	-68.0542						58.2	-62.4084
58.25	-64.1785						58.25	-66.0095				58.25	-66.8335						58.25	-62.2253
58.3	-64.1479						58.3	-65.918				58.3	-65.3076						58.3	-61.8591
58.35	-64.0564						58.35	-66.0095				58.35	-66.8335						58.35	-62.3474
58.4	-63.9648						58.4	-65.7349				58.4	-65.6128						58.4	-62.2864
58.45	-64.0259						58.45	-65.6128				58.45	-68.6646						58.45	-61.9812
58.5	-64.27						58.5	-65.7654				58.5	-66.2231						58.5	-62.1948
58.55	-64.3005						58.55	-65.918				58.55	-65.918						58.55	-62.439
58.6	-64.2395						58.6	-65.9485				58.6	-67.749						58.6	-62.2559
58.65	-64.27						58.65	-65.8264				58.65	-65.0024						58.65	-62.0422
58.7	-63.8428						58.7	-65.8874				58.7	-67.749						58.7	-62.3474
58.75	-63.9954						58.75	-65.7043				58.75	-65.6128						58.75	-62.439
58.8	-64.1785						58.8	-65.5212				58.8	-68.0542						58.8	-62.1033
58.85	-64.3921						58.85	-65.5518				58.85	-67.1387						58.85	-62.2559
58.9	-64.27						58.9	-65.7349				58.9	-65.3076						58.9	-62.4695
58.95	-64.209						58.95	-65.918				58.95	-67.4438						58.95	-62.3779
59	-64.1479						59	-65.7959				59	-65.6128						59	-62.0117
59.05	-63.9954						59.05	-65.7043				59.05	-68.6646						59.05	-62.3779
59.1	-63.9343						59.1	-65.7349				59.1	-65.3076						59.1	-62.3474
59.15	-64.1174						59.15	-65.6128				59.15	-68.6646						59.15	-62.3474
59.2	-64.2395						59.2	-65.4907				59.2	-66.5283						59.2	-62.0728
59.25	-64.3005						59.25	-65.3381				59.25	-68.0542						59.25	-62.4695
59.3	-64.2395						59.3	-65.6433				59.3	-65.918						59.3	-62.3779
59.35	-64.2395						59.35	-65.7654				59.35	-67.1387						59.35	-62.1948
59.4	-64.1479						59.4	-65.7349				59.4	-67.1387						59.4	-62.1033
59.45	-63.9343						59.45	-65.7043				59.45	-68.0542						59.45	-62.4084
59.5	-63.8733						59.5	-65.7349				59.5	-66.8335						59.5	-62.3474
59.55	-64.0259						59.55	-65.7349				59.55	-66.2231						59.55	-62.2559
59.6	-64.3005						59.6	-65.5212				59.6	-68.0542						59.6	-62.2559
59.65	-64.27						59.65	-65.3381				59.65	-66.8335						59.65	-62.439
59.7	-64.27						59.7	-65.3992				59.7	-66.5283						59.7	-62.4084
59.75	-64.1785						59.75	-65.4907				59.75	-66.5283						59.75	-62.2559
59.8	-64.1785						59.8	-65.5823				59.8	-68.0542						59.8	-62.1948
59.85	-64.0564						59.85	-65.7043				59.85	-65.6128						59.85	-62.4695
59.9	-63.9343						59.9	-65.7654				59.9	-66.8335						59.9	-62.439
59.95	-63.8428						59.95	-65.7043				59.95	-65.3076						59.95	-62.3169
60	-63.9038						60	-65.6433				60	-67.4438						60	-62.2253
60.05	-64.0869						60.05	-65.5212				60.05	-65.6128						60.05	-62.5
60.1	-64.27						60.1	-65.5823				60.1	-67.4438						60.1	-62.4695
60.15	-64.1785						60.15	-65.4602				60.15	-65.918						60.15	-62.4084
60.2	-64.1174						60.2	-65.3381				60.2	-67.4438						60.2	-62.1338
60.25	-64.1479						60.25	-65.2771				60.25	-65.918						60.25	-62.3474
60.3	-64.0564						60.3	-65.3381				60.3	-67.1387						60.3	-62.561
60.35	-63.8733						60.35	-65.4907				60.35	-65.6128						60.35	-62.4695
60.4	-63.8123						60.4	-65.4907				60.4	-67.1387						60.4	-62.2864
60.45	-64.1174						60.45	-65.5823				60.45	-65.0024						60.45	-62.2559
60.5	-64.1785						60.5	-65.7043				60.5	-67.1387						60.5	-62.5
60.55	-64.1174						60.55	-65.6433				60.55	-65.0024						60.55	-62.4695
60.6	-63.8123						60.6	-65.4907				60.6	-67.1387						60.6	-62.3779
60.65	-63.8428						60.65	-65.5518				60.65	-66.2231						60.65	-62.1033
60.7	-64.1479						60.7	-65.5518				60.7	-65.918						60.7	-62.2559
60.75	-64.1174						60.75	-65.5212				60.75	-65.918						60.75	-62.5915
60.8	-63.8733						60.8	-65.3992				60.8	-66.5283						60.8	-62.4084
60.85	-63.8733						60.85	-65.3381				60.85	-67.1387						60.85	-62.2253
60.9	-64.1785						60.9	-65.2771				60.9	-65.918						60.9	-62.0422
60.95	-64.0869						60.95	-65.2466				60.95	-66.5283						60.95	-62.3474
61	-63.7512						61	-65.2466				61	-65.6128						61	-62.3779
61.05	-64.2395						61.05	-65.2466				61.05	-67.4438						61.05	-62.4084
61.1	-64.0869						61.1	-65.3381				61.1	-65.918						61.1	-62.1948
61.15	-63.7817						61.15	-65.4907				61.15	-67.4438						61.15	-62.1338
61.2	-64.1174						61.2	-65.4907				61.2	-65.3076						61.2	-62.3474
61.25	-64.0869						61.25	-65.4907				61.25	-67.749						61.25	-62.439
61.3	-63.8733						61.3	-65.5823				61.3	-65.3076						61.3	-62.3169
61.35	-64.1479						61.35	-65.5518				61.35	-67.749						61.35	-62.1643
61.4	-63.9038						61.4	-65.3992				61.4	-64.6973						61.4	-62.0422
61.45	-64.1174						61.45	-65.3686				61.45	-68.0542						61.45	-62.3474
61.5	-64.1174						61.5	-65.3381				61.5	-65.6128						61.5	-62.3779
61.55	-63.6597						61.55	-65.155				61.55	-67.1387						61.55	-62.3169
61.6	-64.1174						61.6	-65.0024				61.6	-64.0869						61.6	-62.2864
61.65	-64.1479						61.65	-65.155				61.65	-67.4438						61.65	-62.0117
61.7	-63.8123						61.7	-65.3992				61.7	-65.3076						61.7	-62.1033
61.75	-64.1174						61.75	-65.2771				61.75	-66.8335						61.75	-62.3169
61.8	-63.9954						61.8	-65.155				61.8	-65.0024						61.8	-62.3779
61.85	-63.9648						61.85	-64.9109				61.85	-66.8335						61.85	-62.2559
61.9	-64.2395						61.9	-65.2161				61.9	-67.1387						61.9	-62.1033
61.95	-63.8733						61.95	-65.2161				61.95	-65.918						61.95	-61.9812
62	-63.9343						62	-65.1245				62	-66.8335						62	-62.3169
62.05	-64.1479						62.05	-64.7278				62.05	-65.918						62.05	-62.3474
62.1	-63.9343						62.1	-65.155				62.1	-67.749						62.1	-62.2864
62.15	-63.9343						62.15	-65.155				62.15	-65.6128						62.15	-62.1948
62.2	-64.0869						62.2	-64.9109				62.2	-66.8335						62.2	-62.0422
62.25	-63.9648						62.25	-65.033				62.25	-64.6973						62.25	-62.0728
62.3	-63.9038						62.3	-65.1855				62.3	-66.8335						62.3	-62.3169
62.35	-64.0869						62.35	-64.9719				62.35	-66.2231						62.35	-62.3474
62.4	-63.9954						62.4	-64.9414				62.4	-66.8335						62.4	-62.3474
62.45	-63.7817						62.45	-65.094				62.45	-67.1387						62.45	-62.2864
62.5	-64.1785						62.5	-64.9414				62.5	-66.2231						62.5	-62.1033
62.55	-64.0564						62.55	-64.8498				62.55	-67.1387						62.55	-61.8896
62.6	-63.7512						62.6	-65.1855				62.6	-65.6128						62.6	-62.3169
62.65	-64.0259						62.65	-64.8498				62.65	-68.6646						62.65	-62.4084
62.7	-64.0869						62.7	-64.8193				62.7	-65.3076						62.7	-62.3169
62.75	-63.8733						62.75	-65.094				62.75	-67.749						62.75	-62.1948
62.8	-63.7207						62.8	-65.033				62.8	-65.6128						62.8	-62.2559
62.85	-64.0869						62.85	-64.6973				62.85	-66.5283						62.85	-62.0117
62.9	-63.9648						62.9	-65.094				62.9	-67.749						62.9	-61.9812
62.95	-63.7207						62.95	-64.9109				62.95	-65.0024						62.95	-62.1948
63	-63.8123						63	-64.6973				63	-68.0542						63	-62.439
63.05	-64.0869						63.05	-65.033				63.05	-65.3076						63.05	-62.3779
63.1	-63.8733						63.1	-65.033				63.1	-67.4438						63.1	-62.3474
63.15	-63.6597						63.15	-64.6667				63.15	-65.6128						63.15	-62.1948
63.2	-63.9648						63.2	-64.9719				63.2	-67.749						63.2	-62.1643
63.25	-63.9343						63.25	-65.0024				63.25	-67.1387						63.25	-62.0117
63.3	-63.8428						63.3	-64.7583				63.3	-65.918						63.3	-62.1338
63.35	-63.5986						63.35	-64.7278				63.35	-67.749						63.35	-62.3474
63.4	-63.9954						63.4	-65.033				63.4	-65.3076						63.4	-62.561
63.45	-63.9038						63.45	-64.9414				63.45	-67.4438						63.45	-62.3474
63.5	-63.7817						63.5	-64.6667				63.5	-66.8335						63.5	-62.3474
63.55	-63.7207						63.55	-64.7583				63.55	-66.2231						63.55	-62.2864
63.6	-63.9954						63.6	-65.0024				63.6	-67.749						63.6	-62.2559
63.65	-63.9038						63.65	-64.9414				63.65	-65.6128						63.65	-62.1033
63.7	-63.6902						63.7	-64.6362				63.7	-67.749						63.7	-62.2559
63.75	-63.7207						63.75	-64.7583				63.75	-65.6128						63.75	-62.3474
63.8	-63.9954						63.8	-65.033				63.8	-66.8335						63.8	-62.5
63.85	-63.8733						63.85	-64.9414				63.85	-68.3594						63.85	-62.561
63.9	-63.6597						63.9	-64.6973				63.9	-64.6973						63.9	-62.4084
63.95	-63.5986						63.95	-64.7583				63.95	-67.749						63.95	-62.4695
64	-63.8428						64	-64.9719				64	-64.6973						64	-62.3169
64.05	-63.8123						64.05	-64.8804				64.05	-67.1387						64.05	-62.2864
64.1	-63.7512						64.1	-64.6973				64.1	-67.4438						64.1	-62.0422
64.15	-63.5681						64.15	-64.6362				64.15	-65.3076						64.15	-62.1338
64.2	-63.8733						64.2	-64.9414				64.2	-67.749						64.2	-62.3169
64.25	-63.8123						64.25	-64.8804				64.25	-66.2231						64.25	-62.561
64.3	-63.7512						64.3	-64.7888				64.3	-66.5283						64.3	-62.439
64.35	-63.446						64.35	-64.5142				64.35	-68.0542						64.35	-62.4084
64.4	-63.7512						64.4	-64.8193				64.4	-65.0024						64.4	-62.3779
64.45	-63.8428						64.45	-64.9719				64.45	-67.1387						64.45	-62.439
64.5	-63.8428						64.5	-64.7888				64.5	-66.2231						64.5	-62.2559
64.55	-63.5986						64.55	-64.6973				64.55	-66.2231						64.55	-62.1033
64.6	-63.5986						64.6	-64.5752				64.6	-67.1387						64.6	-62.0117
64.65	-63.7817						64.65	-64.8498				64.65	-64.6973						64.65	-62.1643
64.7	-63.8123						64.7	-64.8498				64.7	-66.8335						64.7	-62.2864
64.75	-63.6597						64.75	-64.8498				64.75	-67.749						64.75	-62.3779
64.8	-63.385						64.8	-64.6362				64.8	-65.3076						64.8	-62.3169
64.85	-63.6291						64.85	-64.6362				64.85	-67.4438						64.85	-62.2253
64.9	-63.8428						64.9	-64.8498				64.9	-66.2231						64.9	-62.0422
64.95	-63.7512						64.95	-64.8498				64.95	-65.918						64.95	-62.0728
65	-63.5071						65	-64.9109				65	-67.1387						65	-62.3779
65.05	-63.385						65.05	-64.5447				65.05	-64.0869						65.05	-62.2253
65.1	-63.6902						65.1	-64.7278				65.1	-67.749						65.1	-62.0728
65.15	-63.6902						65.15	-64.9414				65.15	-67.1387						65.15	-62.0728
65.2	-63.5681						65.2	-64.9414				65.2	-65.3076						65.2	-62.3474
65.25	-63.4155						65.25	-64.7888				65.25	-66.8335						65.25	-62.2253
65.3	-63.446						65.3	-64.6057				65.3	-65.918						65.3	-61.8591
65.35	-63.7207						65.35	-64.7278				65.35	-66.8335						65.35	-62.2559
65.4	-63.5986						65.4	-65.0024				65.4	-67.4438						65.4	-62.2559
65.45	-63.5681						65.45	-64.8498				65.45	-64.0869						65.45	-61.8286
65.5	-63.4155						65.5	-64.8193				65.5	-68.0542						65.5	-62.2559
65.55	-63.2935						65.55	-64.6973				65.55	-65.3076						65.55	-62.1643
65.6	-63.5071						65.6	-64.6973				65.6	-66.8335						65.6	-61.7981
65.65	-63.5681						65.65	-64.7888				65.65	-64.3921						65.65	-62.2253
65.7	-63.5986						65.7	-64.8498				65.7	-68.0542						65.7	-62.1338
65.75	-63.3545						65.75	-64.8498				65.75	-64.6973						65.75	-61.8286
65.8	-63.1714						65.8	-64.8193				65.8	-67.4438						65.8	-62.1338
65.85	-63.4155						65.85	-64.4836				65.85	-64.6973						65.85	-61.8591
65.9	-63.5986						65.9	-64.6973				65.9	-68.0542						65.9	-61.9812
65.95	-63.4766						65.95	-64.8804				65.95	-65.6128						65.95	-62.0728
66	-63.385						66	-64.8193				66	-68.3594						66	-61.7676
66.05	-63.1714						66.05	-64.8193				66.05	-65.3076						66.05	-62.0728
66.1	-63.1103						66.1	-64.6973				66.1	-68.3594						66.1	-62.1338
66.15	-63.4155						66.15	-64.5752				66.15	-67.1387						66.15	-61.7676
66.2	-63.446						66.2	-64.7583				66.2	-65.918						66.2	-62.1033
66.25	-63.4155						66.25	-64.8804				66.25	-67.4438						66.25	-62.0422
66.3	-63.324						66.3	-64.8804				66.3	-65.3076						66.3	-61.7065
66.35	-63.0798						66.35	-64.9109				66.35	-68.6646						66.35	-62.1033
66.4	-63.1409						66.4	-64.6973				66.4	-65.3076						66.4	-61.9202
66.45	-63.385						66.45	-64.6057				66.45	-68.3594						66.45	-61.676
66.5	-63.385						66.5	-64.6362				66.5	-66.8335						66.5	-62.0728
66.55	-63.385						66.55	-64.8498				66.55	-66.2231						66.55	-62.0422
66.6	-63.2019						66.6	-64.9414				66.6	-68.0542						66.6	-61.554
66.65	-63.0188						66.65	-64.8498				66.65	-65.6128						66.65	-62.0422
66.7	-63.0188						66.7	-64.7888				66.7	-67.749						66.7	-61.9507
66.75	-63.2935						66.75	-64.6973				66.75	-65.918						66.75	-61.6455
66.8	-63.2935						66.8	-64.4531				66.8	-65.918						66.8	-61.7371
66.85	-63.2019						66.85	-64.7583				66.85	-67.1387						66.85	-61.9507
66.9	-63.2019						66.9	-64.9109				66.9	-65.918						66.9	-61.7371
66.95	-63.1103						66.95	-64.9719				66.95	-67.749						66.95	-61.554
67	-62.9578						67	-64.9109				67	-66.5283						67	-61.9202
67.05	-62.8967						67.05	-65.033				67.05	-65.918						67.05	-61.8286
67.1	-63.2019						67.1	-64.7583				67.1	-67.1387						67.1	-61.4624
67.15	-63.2629						67.15	-64.6667				67.15	-64.6973						67.15	-61.7371
67.2	-63.2019						67.2	-64.6667				67.2	-67.1387						67.2	-61.7981
67.25	-63.1409						67.25	-64.9719				67.25	-65.0024						67.25	-61.676
67.3	-63.0188						67.3	-65.0635				67.3	-68.6646						67.3	-61.5234
67.35	-62.8357						67.35	-65.0635				67.35	-66.2231						67.35	-61.7065
67.4	-62.8662						67.4	-65.033				67.4	-66.5283						67.4	-61.7065
67.45	-63.0188						67.45	-65.0024				67.45	-66.5283						67.45	-61.6455
67.5	-63.1103						67.5	-64.8498				67.5	-66.2231						67.5	-61.554
67.55	-63.1409						67.55	-64.7278				67.55	-67.1387						67.55	-61.8286
67.6	-63.1409						67.6	-64.7888				67.6	-65.3076						67.6	-61.7065
67.65	-63.0493						67.65	-65.0024				67.65	-66.2231						67.65	-61.4319
67.7	-62.8967						67.7	-65.033				67.7	-65.0024						67.7	-61.6455
67.75	-62.7136						67.75	-65.0635				67.75	-67.749						67.75	-61.7981
67.8	-62.8052						67.8	-65.033				67.8	-65.0024						67.8	-61.7065
67.85	-62.8967						67.85	-65.033				67.85	-67.749						67.85	-61.4014
67.9	-63.0188						67.9	-64.9414				67.9	-65.3076						67.9	-61.7065
67.95	-63.1714						67.95	-64.8804				67.95	-67.749						67.95	-61.7371
68	-63.0798						68	-64.7583				68	-65.6128						68	-61.7676
68.05	-63.0188						68.05	-64.7888				68.05	-68.0542						68.05	-61.4319
68.1	-62.9272						68.1	-64.9414				68.1	-65.0024						68.1	-61.6455
68.15	-62.9272						68.15	-65.0024				68.15	-68.6646						68.15	-61.7981
68.2	-62.7441						68.2	-65.2161				68.2	-64.6973						68.2	-61.7065
68.25	-62.7136						68.25	-65.155				68.25	-68.3594						68.25	-61.4624
68.3	-62.7747						68.3	-65.033				68.3	-65.3076						68.3	-61.5845
68.35	-62.9272						68.35	-65.033				68.35	-68.0542						68.35	-61.7371
68.4	-63.1409						68.4	-65.094				68.4	-65.6128						68.4	-61.7371
68.45	-63.0798						68.45	-64.9719				68.45	-67.4438						68.45	-61.4929
68.5	-62.9883						68.5	-64.8804				68.5	-64.3921						68.5	-61.554
68.55	-63.0493						68.55	-64.7888				68.55	-69.2749						68.55	-61.7981
68.6	-62.9272						68.6	-64.8498				68.6	-65.6128						68.6	-61.676
68.65	-62.8052						68.65	-65.033				68.65	-67.4438						68.65	-61.676
68.7	-62.7441						68.7	-65.033				68.7	-64.6973						68.7	-61.4929
68.75	-62.9578						68.75	-65.1245				68.75	-68.6646						68.75	-61.7981
68.8	-63.2019						68.8	-65.1855				68.8	-65.6128						68.8	-61.8286
68.85	-63.0798						68.85	-65.155				68.85	-68.3594						68.85	-61.7676
68.9	-62.8967						68.9	-65.094				68.9	-64.6973						68.9	-61.5845
68.95	-62.7136						68.95	-65.094				68.95	-68.6646						68.95	-61.6455
69	-62.9578						69	-65.155				69	-66.5283						69	-61.8896
69.05	-63.0188						69.05	-65.094				69.05	-68.6646						69.05	-61.8286
69.1	-62.9272						69.1	-65.0024				69.1	-64.6973						69.1	-61.676
69.15	-62.6831						69.15	-64.9719				69.15	-67.749						69.15	-61.5234
69.2	-63.1409						69.2	-64.9719				69.2	-65.918						69.2	-61.7065
69.25	-63.0493						69.25	-64.8804				69.25	-67.749						69.25	-61.8896
69.3	-62.8357						69.3	-64.8498				69.3	-65.918						69.3	-61.7981
69.35	-62.8967						69.35	-64.9109				69.35	-67.4438						69.35	-61.7371
69.4	-63.0188						69.4	-65.033				69.4	-66.2231						69.4	-61.554
69.45	-62.7747						69.45	-65.094				69.45	-67.1387						69.45	-61.8591
69.5	-62.9578						69.5	-65.033				69.5	-66.2231						69.5	-61.9507
69.55	-63.0493						69.55	-65.1855				69.55	-67.749						69.55	-61.9507
69.6	-62.6831						69.6	-65.2161				69.6	-67.1387						69.6	-61.7065
69.65	-62.9578						69.65	-65.1855				69.65	-67.1387						69.65	-61.6455
69.7	-63.0188						69.7	-65.0635				69.7	-68.6646						69.7	-61.9202
69.75	-62.5915						69.75	-65.155				69.75	-67.4438						69.75	-62.0728
69.8	-63.1103						69.8	-65.033				69.8	-67.749						69.8	-61.9202
69.85	-62.8052						69.85	-64.9719				69.85	-66.2231						69.85	-61.7676
69.9	-62.7441						69.9	-64.7583				69.9	-68.6646						69.9	-61.676
69.95	-62.9883						69.95	-64.9414				69.95	-66.8335						69.95	-62.0117
70	-62.7441						70	-65.155				70	-68.6646						70	-62.0728
70.05	-62.8662						70.05	-65.1855				70.05	-65.6128						70.05	-61.9507
70.1	-62.9272						70.1	-65.033				70.1	-68.9697						70.1	-62.0117
70.15	-62.5						70.15	-64.7888				70.15	-66.5283						70.15	-61.8591
70.2	-62.9883						70.2	-64.8804				70.2	-68.0542						70.2	-61.8591
70.25	-62.8967						70.25	-65.1245				70.25	-66.2231						70.25	-62.1643
70.3	-62.4695						70.3	-65.0024				70.3	-67.749						70.3	-62.1643
70.35	-62.9578						70.35	-64.7278				70.35	-67.1387						70.35	-62.2253
70.4	-62.8662						70.4	-64.9109				70.4	-68.0542						70.4	-62.0422
70.45	-62.5						70.45	-65.1245				70.45	-68.0542						70.45	-61.9202
70.5	-62.8967						70.5	-64.9414				70.5	-66.5283						70.5	-62.1643
70.55	-62.7136						70.55	-64.7583				70.55	-68.3594						70.55	-62.3169
70.6	-62.439						70.6	-65.094				70.6	-65.918						70.6	-62.2559
70.65	-62.9272						70.65	-65.1245				70.65	-69.2749						70.65	-62.2864
70.7	-62.8052						70.7	-64.6973				70.7	-66.5283						70.7	-62.2253
70.75	-62.4084						70.75	-65.1245				70.75	-67.4438						70.75	-62.1338
70.8	-62.8052						70.8	-65.094				70.8	-65.918						70.8	-62.2559
70.85	-62.8357						70.85	-64.6973				70.85	-68.3594						70.85	-62.4695
70.9	-62.6526						70.9	-65.1245				70.9	-67.4438						70.9	-62.6221
70.95	-62.561						70.95	-65.1245				70.95	-67.4438						70.95	-62.5305
71	-62.9578						71	-64.7888				71	-68.9697						71	-62.4695
71.05	-62.8052						71.05	-65.1245				71.05	-66.5283						71.05	-62.2253
71.1	-62.4695						71.1	-65.1245				71.1	-68.9697						71.1	-62.3474
71.15	-62.7747						71.15	-64.7583				71.15	-65.918						71.15	-62.5915
71.2	-62.8967						71.2	-65.0635				71.2	-68.6646						71.2	-62.6526
71.25	-62.7136						71.25	-65.094				71.25	-67.1387						71.25	-62.6221
71.3	-62.561						71.3	-64.7888				71.3	-67.4438						71.3	-62.6526
71.35	-62.8052						71.35	-64.9414				71.35	-68.3594						71.35	-62.5915
71.4	-62.8662						71.4	-65.094				71.4	-67.1387						71.4	-62.4084
71.45	-62.4695						71.45	-64.9109				71.45	-69.5801						71.45	-62.439
71.5	-62.7747						71.5	-64.7888				71.5	-65.6128						71.5	-62.7136
71.55	-62.8967						71.55	-65.1245				71.55	-68.0542						71.55	-62.8357
71.6	-62.8357						71.6	-65.033				71.6	-66.8335						71.6	-62.8357
71.65	-62.5						71.65	-64.6973				71.65	-67.749						71.65	-62.7747
71.7	-62.8357						71.7	-65.033				71.7	-69.2749						71.7	-62.8357
71.75	-62.8662						71.75	-65.0635				71.75	-65.918						71.75	-62.7136
71.8	-62.7441						71.8	-64.9414				71.8	-69.5801						71.8	-62.5915
71.85	-62.561						71.85	-64.7278				71.85	-66.8335						71.85	-62.6526
71.9	-62.8662						71.9	-65.094				71.9	-68.0542						71.9	-62.8967
71.95	-62.8967						71.95	-65.0635				71.95	-67.749						71.95	-63.0493
72	-62.7441						72	-64.9414				72	-68.0542						72	-63.0188
72.05	-62.561						72.05	-64.7278				72.05	-69.2749						72.05	-63.0493
72.1	-62.8967						72.1	-65.1245				72.1	-66.8335						72.1	-62.9883
72.15	-62.8052						72.15	-65.094				72.15	-67.749						72.15	-62.8662
72.2	-62.7747						72.2	-64.9719				72.2	-68.6646						72.2	-62.7136
72.25	-62.5915						72.25	-64.8193				72.25	-68.0542						72.25	-62.7136
72.3	-62.8662						72.3	-65.094				72.3	-69.2749						72.3	-62.9578
72.35	-62.8967						72.35	-65.2771				72.35	-65.918						72.35	-63.1409
72.4	-62.7441						72.4	-65.094				72.4	-68.6646						72.4	-63.0188
72.45	-62.6221						72.45	-64.9414				72.45	-68.0542						72.45	-63.1409
72.5	-62.8967						72.5	-65.0024				72.5	-67.4438						72.5	-63.1103
72.55	-62.8662						72.55	-65.2161				72.55	-69.5801						72.55	-63.0798
72.6	-62.7136						72.6	-65.094				72.6	-66.8335						72.6	-62.9272
72.65	-62.561						72.65	-65.033				72.65	-68.3594						72.65	-62.8662
72.7	-62.7747						72.7	-64.8804				72.7	-68.0542						72.7	-62.7441
72.75	-62.8662						72.75	-65.155				72.75	-66.8335						72.75	-62.8357
72.8	-62.8967						72.8	-65.1245				72.8	-70.1904						72.8	-62.8967
72.85	-62.5305						72.85	-65.1245				72.85	-66.2231						72.85	-63.1409
72.9	-62.6831						72.9	-64.9414				72.9	-67.1387						72.9	-63.1409
72.95	-62.8662						72.95	-64.9719				72.95	-69.5801						72.95	-63.2324
73	-62.8662						73	-65.1855				73	-66.5283						73	-63.0188
73.05	-62.7747						73.05	-65.3076				73.05	-68.3594						73.05	-63.0493
73.1	-62.5						73.1	-65.094				73.1	-66.5283						73.1	-62.8052
73.15	-62.8052						73.15	-64.8498				73.15	-66.5283						73.15	-62.9272
73.2	-62.9883						73.2	-65.0635				73.2	-68.9697						73.2	-63.0798
73.25	-62.8357						73.25	-65.3686				73.25	-65.6128						73.25	-63.2019
73.3	-62.6831						73.3	-65.2466				73.3	-67.1387						73.3	-63.1103
73.35	-62.5915						73.35	-65.1245				73.35	-68.0542						73.35	-62.9883
73.4	-62.9272						73.4	-64.8498				73.4	-65.918						73.4	-62.9883
73.45	-62.8967						73.45	-65.2161				73.45	-67.749						73.45	-63.2629
73.5	-62.8052						73.5	-65.4297				73.5	-65.918						73.5	-63.1714
73.55	-62.5						73.55	-65.2466				73.55	-65.6128						73.55	-62.8662
73.6	-62.6221						73.6	-65.2466				73.6	-68.6646						73.6	-63.2019
73.65	-62.9272						73.65	-65.033				73.65	-64.6973						73.65	-63.2019
73.7	-62.9883						73.7	-65.1245				73.7	-65.918						73.7	-62.9578
73.75	-62.8357						73.75	-65.3992				73.75	-65.3076						73.75	-63.1103
73.8	-62.561						73.8	-65.3381				73.8	-65.3076						73.8	-63.1714
73.85	-62.6526						73.85	-65.3381				73.85	-67.1387						73.85	-62.8357
73.9	-63.0188						73.9	-65.1855				73.9	-64.0869						73.9	-63.1409
73.95	-62.9272						73.95	-65.0024				73.95	-65.918						73.95	-63.1409
74	-62.8357						74	-65.3686				74	-63.7817						74	-62.7747
74.05	-62.6831						74.05	-65.3686				74.05	-65.918						74.05	-63.2324
74.1	-62.6221						74.1	-65.3992				74.1	-62.561						74.1	-63.1409
74.15	-62.8967						74.15	-65.2161				74.15	-64.6973						74.15	-62.8357
74.2	-62.9883						74.2	-65.033				74.2	-62.561						74.2	-63.2629
74.25	-63.0188						74.25	-65.155				74.25	-65.6128						74.25	-63.0188
74.3	-62.8967						74.3	-65.3992				74.3	-63.4766						74.3	-62.9272
74.35	-62.6526						74.35	-65.3686				74.35	-63.4766						74.35	-63.1714
74.4	-62.8052						74.4	-65.3076				74.4	-63.7817						74.4	-62.9883
74.45	-63.0798						74.45	-65.2771				74.45	-62.2559						74.45	-62.9578
74.5	-63.1409						74.5	-65.094				74.5	-63.4766						74.5	-63.0798
74.55	-63.1409						74.55	-65.094				74.55	-61.3403						74.55	-62.7136
74.6	-62.8052						74.6	-65.3992				74.6	-63.7817						74.6	-63.0798
74.65	-62.7441						74.65	-65.4907				74.65	-62.2559						74.65	-62.9883
74.7	-62.9578						74.7	-65.3992				74.7	-62.561						74.7	-62.6526
74.75	-63.1409						74.75	-65.3076				74.75	-62.2559						74.75	-63.0188
74.8	-63.0798						74.8	-65.0635				74.8	-60.73						74.8	-62.9883
74.85	-63.1409						74.85	-65.1245				74.85	-63.7817						74.85	-62.7441
74.9	-62.9272						74.9	-65.3992				74.9	-61.0352						74.9	-62.8662
74.95	-62.7441						74.95	-65.4297				74.95	-62.561						74.95	-63.0188
75	-62.9578						75	-65.3686				75	-60.73						75	-62.8357
75.05	-63.2629						75.05	-65.4602				75.05	-60.4248						75.05	-62.6831
75.1	-63.1714						75.1	-65.3686				75.1	-62.561						75.1	-62.9578
75.15	-63.1409						75.15	-65.155				75.15	-59.8145						75.15	-62.9883
75.2	-62.9578						75.2	-65.1855				75.2	-61.6455						75.2	-62.6221
75.25	-62.9883						75.25	-65.4907				75.25	-60.73						75.25	-62.8967
75.3	-62.8967						75.3	-65.5212				75.3	-58.8989						75.3	-62.8357
75.35	-62.9272						75.35	-65.5212				75.35	-60.73						75.35	-62.7441
75.4	-63.1714						75.4	-65.4602				75.4	-57.373						75.4	-62.6221
75.45	-63.2019						75.45	-65.4297				75.45	-61.9507						75.45	-62.8967
75.5	-63.1409						75.5	-65.3381				75.5	-59.5093						75.5	-62.7747
75.55	-63.0493						75.55	-65.2771				75.55	-59.8145						75.55	-62.6831
75.6	-62.8662						75.6	-65.3381				75.6	-59.8145						75.6	-62.8052
75.65	-62.8357						75.65	-65.5823				75.65	-58.2886						75.65	-62.8967
75.7	-63.0798						75.7	-65.5518				75.7	-60.4248						75.7	-62.7441
75.75	-63.1714						75.75	-65.5823				75.75	-57.373						75.75	-62.561
75.8	-63.1103						75.8	-65.5518				75.8	-60.1196						75.8	-62.8662
75.85	-63.2019						75.85	-65.4602				75.85	-57.373						75.85	-62.8357
75.9	-63.2019						75.9	-65.3992				75.9	-59.8145						75.9	-62.7136
75.95	-62.9578						75.95	-65.2466				75.95	-57.0679						75.95	-62.5915
76	-62.9272						76	-65.2161				76	-59.5093						76	-62.8662
76.05	-62.8662						76.05	-65.5212				76.05	-58.5938						76.05	-62.7136
76.1	-63.0493						76.1	-65.5823				76.1	-58.2886						76.1	-62.6526
76.15	-63.1714						76.15	-65.6738				76.15	-57.9834						76.15	-62.5
76.2	-63.2629						76.2	-65.5823				76.2	-57.373						76.2	-62.8357
76.25	-63.2019						76.25	-65.5823				76.25	-57.9834						76.25	-62.8052
76.3	-63.1714						76.3	-65.5212				76.3	-56.1523						76.3	-62.7441
76.35	-63.0493						76.35	-65.4602				76.35	-57.9834						76.35	-62.5
76.4	-62.9883						76.4	-65.3992				76.4	-54.9316						76.4	-62.8357
76.45	-62.8967						76.45	-65.2466				76.45	-57.373						76.45	-62.7747
76.5	-62.9883						76.5	-65.3992				76.5	-55.542						76.5	-62.6831
76.55	-63.0493						76.55	-65.5823				76.55	-56.7627						76.55	-62.4695
76.6	-63.1409						76.6	-65.6738				76.6	-54.9316						76.6	-62.8357
76.65	-63.2629						76.65	-65.6128				76.65	-57.6782						76.65	-62.8052
76.7	-63.1409						76.7	-65.6738				76.7	-54.6265						76.7	-62.6526
76.75	-63.1103						76.75	-65.6128				76.75	-56.7627						76.75	-62.439
76.8	-63.0493						76.8	-65.6128				76.8	-54.3213						76.8	-62.6526
76.85	-62.9883						76.85	-65.5518				76.85	-57.373						76.85	-62.7441
76.9	-62.8967						76.9	-65.4907				76.9	-54.0161						76.9	-62.6831
76.95	-62.7747						76.95	-65.3992				76.95	-56.1523						76.95	-62.5915
77	-62.9272						77	-65.3381				77	-53.7109						77	-62.5
77.05	-63.1714						77.05	-65.3381				77.05	-57.0679						77.05	-62.6526
77.1	-63.1714						77.1	-65.5518				77.1	-54.0161						77.1	-62.7136
77.15	-63.1714						77.15	-65.6433				77.15	-56.4575						77.15	-62.5
77.2	-62.9578						77.2	-65.6128				77.2	-53.4058						77.2	-62.3779
77.25	-62.8662						77.25	-65.7043				77.25	-56.1523						77.25	-62.561
77.3	-63.1409						77.3	-65.7959				77.3	-54.0161						77.3	-62.6831
77.35	-63.1409						77.35	-65.7349				77.35	-56.1523						77.35	-62.6526
77.4	-62.9578						77.4	-65.6433				77.4	-52.4902						77.4	-62.5
77.45	-62.8052						77.45	-65.6433				77.45	-55.542						77.45	-62.3169
77.5	-63.2019						77.5	-65.7043				77.5	-52.4902						77.5	-62.6221
77.55	-63.1714						77.55	-65.6433				77.55	-56.1523						77.55	-62.6526
77.6	-62.8052						77.6	-65.5212				77.6	-52.1851						77.6	-62.6526
77.65	-63.1409						77.65	-65.5212				77.65	-54.9316						77.65	-62.3474
77.7	-63.1714						77.7	-65.6128				77.7	-52.7954						77.7	-62.2559
77.75	-62.8357						77.75	-65.4907				77.75	-55.542						77.75	-62.6221
77.8	-63.1409						77.8	-65.3686				77.8	-52.7954						77.8	-62.6221
77.85	-63.1103						77.85	-65.4602				77.85	-54.3213						77.85	-62.5915
77.9	-62.8357						77.9	-65.5212				77.9	-53.7109						77.9	-62.2864
77.95	-63.2324						77.95	-65.6738				77.95	-54.3213						77.95	-62.2864
78	-63.1103						78	-65.6738				78	-53.4058						78	-62.439
78.05	-62.7747						78.05	-65.7349				78.05	-54.0161						78.05	-62.6221
78.1	-63.2935						78.1	-65.8569				78.1	-54.9316						78.1	-62.5
78.15	-63.0188						78.15	-65.8264				78.15	-54.3213						78.15	-62.2253
78.2	-62.9883						78.2	-65.7349				78.2	-54.9316						78.2	-62.1948
78.25	-63.2019						78.25	-65.6128				78.25	-54.0161						78.25	-62.439
78.3	-62.8967						78.3	-65.4907				78.3	-56.1523						78.3	-62.4695
78.35	-63.2324						78.35	-65.6738				78.35	-54.6265						78.35	-62.439
78.4	-63.2324						78.4	-65.7959				78.4	-55.542						78.4	-62.3474
78.45	-62.8052						78.45	-65.7654				78.45	-53.1006						78.45	-62.1948
78.5	-63.2935						78.5	-65.6738				78.5	-57.0679						78.5	-62.1338
78.55	-63.1714						78.55	-65.5518				78.55	-53.7109						78.55	-62.3474
78.6	-62.8662						78.6	-65.7654				78.6	-57.0679						78.6	-62.439
78.65	-63.385						78.65	-65.8264				78.65	-52.7954						78.65	-62.3779
78.7	-63.2019						78.7	-65.7654				78.7	-57.0679						78.7	-62.2253
78.75	-62.9272						78.75	-65.6128				78.75	-53.1006						78.75	-61.9507
78.8	-63.2935						78.8	-65.918				78.8	-55.8472						78.8	-62.1948
78.85	-63.2019						78.85	-65.8264				78.85	-54.0161						78.85	-62.3474
78.9	-62.8967						78.9	-65.5212				78.9	-56.1523						78.9	-62.3474
78.95	-63.324						78.95	-65.8264				78.95	-56.4575						78.95	-62.1948
79	-63.1714						79	-65.7959				79	-55.2368						79	-62.1338
79.05	-62.9272						79.05	-65.5518				79.05	-56.4575						79.05	-61.9507
79.1	-63.2019						79.1	-65.7959				79.1	-55.542						79.1	-61.9202
79.15	-63.2935						79.15	-65.8569				79.15	-57.9834						79.15	-62.2253
79.2	-62.9883						79.2	-65.4907				79.2	-54.3213						79.2	-62.3474
79.25	-63.0493						79.25	-65.7043				79.25	-57.9834						79.25	-62.2559
79.3	-63.3545						79.3	-65.8569				79.3	-54.9316						79.3	-62.1948
79.35	-63.2935						79.35	-65.6128				79.35	-57.6782						79.35	-62.0422
79.4	-62.8662						79.4	-65.6433				79.4	-55.2368						79.4	-61.9507
79.45	-63.385						79.45	-65.7959				79.45	-57.373						79.45	-62.1033
79.5	-63.324						79.5	-65.6128				79.5	-57.6782						79.5	-62.1948
79.55	-63.2019						79.55	-65.7349				79.55	-56.7627						79.55	-62.2253
79.6	-63.0493						79.6	-65.7043				79.6	-57.9834						79.6	-62.2253
79.65	-63.3545						79.65	-65.5518				79.65	-55.8472						79.65	-62.1948
79.7	-63.2935						79.7	-65.6128				79.7	-59.2041						79.7	-61.9507
79.75	-63.0188						79.75	-65.8264				79.75	-55.8472						79.75	-61.7371
79.8	-63.2019						79.8	-65.7349				79.8	-57.9834						79.8	-61.9812
79.85	-63.385						79.85	-65.3992				79.85	-57.6782						79.85	-62.1338
79.9	-63.324						79.9	-65.8264				79.9	-57.6782						79.9	-62.2253
79.95	-62.9578						79.95	-65.7959				79.95	-59.8145						79.95	-62.1643
80	-63.324						80	-65.5823				80	-56.4575						80	-62.1948
80.05	-63.2935						80.05	-65.4602				80.05	-59.5093						80.05	-62.0117
80.1	-63.2019						80.1	-65.8264				80.1	-58.2886						80.1	-61.9202
80.15	-63.0798						80.15	-65.7043				80.15	-58.8989						80.15	-61.8286
80.2	-63.3545						80.2	-65.4907				80.2	-58.8989						80.2	-61.8896
80.25	-63.3545						80.25	-65.5518				80.25	-57.9834						80.25	-62.0117
80.3	-63.2324						80.3	-65.7654				80.3	-61.0352						80.3	-62.1338
80.35	-63.0188						80.35	-65.6738				80.35	-57.373						80.35	-62.0728
80.4	-63.385						80.4	-65.4297				80.4	-60.1196						80.4	-62.1338
80.45	-63.324						80.45	-65.4907				80.45	-58.8989						80.45	-62.0422
80.5	-63.2019						80.5	-65.6738				80.5	-60.1196						80.5	-61.8591
80.55	-63.0188						80.55	-65.6433				80.55	-60.73						80.55	-61.7981
80.6	-63.4155						80.6	-65.3992				80.6	-58.5938						80.6	-61.7065
80.65	-63.385						80.65	-65.4602				80.65	-61.6455						80.65	-61.8591
80.7	-63.324						80.7	-65.6738				80.7	-58.8989						80.7	-61.9202
80.75	-63.1409						80.75	-65.6433				80.75	-60.73						80.75	-62.0728
80.8	-63.385						80.8	-65.4297				80.8	-61.0352						80.8	-62.1338
80.85	-63.4155						80.85	-65.2771				80.85	-59.5093						80.85	-62.1033
80.9	-63.2935						80.9	-65.6128				80.9	-62.2559						80.9	-62.0117
80.95	-63.0798						80.95	-65.5823				80.95	-59.8145						80.95	-61.9507
81	-63.2324						81	-65.4907				81	-61.3403						81	-62.0117
81.05	-63.4155						81.05	-65.155				81.05	-62.2559						81.05	-61.9202
81.1	-63.385						81.1	-65.4907				81.1	-60.1196						81.1	-61.6455
81.15	-63.2324						81.15	-65.6433				81.15	-63.4766						81.15	-61.7676
81.2	-63.1714						81.2	-65.5823				81.2	-61.0352						81.2	-61.9202
81.25	-63.385						81.25	-65.3686				81.25	-61.6455						81.25	-62.0728
81.3	-63.385						81.3	-65.2161				81.3	-63.1714						81.3	-62.0117
81.35	-63.385						81.35	-65.5823				81.35	-61.6455						81.35	-62.0422
81.4	-63.0493						81.4	-65.5518				81.4	-63.7817						81.4	-62.0117
81.45	-63.324						81.45	-65.4907				81.45	-62.561						81.45	-61.8591
81.5	-63.4766						81.5	-65.2771				81.5	-61.6455						81.5	-61.5845
81.55	-63.5071						81.55	-65.4297				81.55	-65.0024						81.55	-61.8896
81.6	-63.324						81.6	-65.5518				81.6	-62.2559						81.6	-62.0728
81.65	-63.0798						81.65	-65.5212				81.65	-63.4766						81.65	-62.0117
81.7	-63.385						81.7	-65.3992				81.7	-63.7817						81.7	-61.7981
81.75	-63.5376						81.75	-65.2161				81.75	-62.8662						81.75	-61.676
81.8	-63.4766						81.8	-65.3686				81.8	-65.3076						81.8	-62.0728
81.85	-63.2935						81.85	-65.5823				81.85	-64.3921						81.85	-62.0422
81.9	-63.0188						81.9	-65.5212				81.9	-63.1714						81.9	-61.554
81.95	-63.5071						81.95	-65.4907				81.95	-66.5283						81.95	-61.8896
82	-63.5376						82	-65.1855				82	-63.1714						82	-61.9812
82.05	-63.4766						82.05	-65.3381				82.05	-65.6128						82.05	-61.7371
82.1	-63.2629						82.1	-65.5823				82.1	-65.6128						82.1	-61.9202
82.15	-63.1409						82.15	-65.6128				82.15	-65.6128						82.15	-61.9812
82.2	-63.446						82.2	-65.4907				82.2	-67.1387						82.2	-61.8286
82.25	-63.5681						82.25	-65.2771				82.25	-64.6973						82.25	-61.9202
82.3	-63.5071						82.3	-65.1245				82.3	-67.1387						82.3	-62.1033
82.35	-63.3545						82.35	-65.4907				82.35	-65.0024						82.35	-61.7065
82.4	-63.2019						82.4	-65.6128				82.4	-68.0542						82.4	-62.0728
82.45	-63.2935						82.45	-65.4907				82.45	-65.0024						82.45	-62.0422
82.5	-63.5376						82.5	-65.4297				82.5	-68.3594						82.5	-61.6455
82.55	-63.4766						82.55	-65.2466				82.55	-65.918						82.55	-62.1033
82.6	-63.446						82.6	-65.4602				82.6	-68.9697						82.6	-61.9202
82.65	-63.1714						82.65	-65.5823				82.65	-65.3076						82.65	-61.7981
82.7	-63.1103						82.7	-65.5823				82.7	-68.3594						82.7	-62.1338
82.75	-63.4155						82.75	-65.5518				82.75	-68.0542						82.75	-61.8591
82.8	-63.5986						82.8	-65.4602				82.8	-68.6646						82.8	-61.9507
82.85	-63.3545						82.85	-65.2161				82.85	-68.0542						82.85	-62.1338
82.9	-63.385						82.9	-65.3686				82.9	-67.4438						82.9	-61.7981
82.95	-63.1103						82.95	-65.6738				82.95	-70.1904						82.95	-61.9812
83	-63.2324						83	-65.6128				83	-67.4438						83	-62.0728
83.05	-63.324						83.05	-65.4907				83.05	-69.2749						83.05	-61.7676
83.1	-63.5071						83.1	-65.4602				83.1	-68.0542						83.1	-62.1338
83.15	-63.446						83.15	-65.3076				83.15	-68.0542						83.15	-62.1338
83.2	-63.3545						83.2	-65.3381				83.2	-70.1904						83.2	-61.8286
83.25	-63.1714						83.25	-65.4297				83.25	-67.4438						83.25	-61.9812
83.3	-63.1103						83.3	-65.6738				83.3	-70.8008						83.3	-62.1643
83.35	-63.3545						83.35	-65.5518				83.35	-68.9697						83.35	-62.0117
83.4	-63.446						83.4	-65.5518				83.4	-70.1904						83.4	-61.7981
83.45	-63.385						83.45	-65.3686				83.45	-70.1904						83.45	-62.1948
83.5	-63.3545						83.5	-65.2161				83.5	-68.3594						83.5	-62.1338
83.55	-63.2935						83.55	-65.2771				83.55	-72.3267						83.55	-61.7981
83.6	-63.0798						83.6	-65.5823				83.6	-69.8853						83.6	-62.1033
83.65	-63.0798						83.65	-65.5823				83.65	-71.106						83.65	-62.1948
83.7	-63.2935						83.7	-65.4602				83.7	-70.4956						83.7	-61.9812
83.75	-63.4155						83.75	-65.5212				83.75	-69.2749						83.75	-61.8896
83.8	-63.385						83.8	-65.3992				83.8	-71.7163						83.8	-62.0422
83.85	-63.385						83.85	-65.155				83.85	-69.2749						83.85	-62.1033
83.9	-63.2019						83.9	-65.1855				83.9	-72.0215						83.9	-61.8286
83.95	-63.1409						83.95	-65.4297				83.95	-71.106						83.95	-61.9812
84	-62.9883						84	-65.4907				84	-71.7163						84	-62.0117
84.05	-63.2019						84.05	-65.5518				84.05	-72.0215						84.05	-61.9812
84.1	-63.324						84.1	-65.4297				84.1	-70.4956						84.1	-61.615
84.15	-63.324						84.15	-65.5212				84.15	-72.0215						84.15	-61.9812
84.2	-63.324						84.2	-65.3381				84.2	-70.8008						84.2	-61.9202
84.25	-63.3545						84.25	-65.2466				84.25	-72.937						84.25	-61.9812
84.3	-63.1409						84.3	-65.1245				84.3	-69.8853						84.3	-61.7065
84.35	-63.0188						84.35	-65.3686				84.35	-73.5474						84.35	-62.0117
84.4	-62.9883						84.4	-65.4297				84.4	-70.8008						84.4	-61.9507
84.45	-63.0798						84.45	-65.6128				84.45	-74.1577						84.45	-61.8896
84.5	-63.2935						84.5	-65.5212				84.5	-71.106						84.5	-61.6455
84.55	-63.2324						84.55	-65.4602				84.55	-73.8525						84.55	-62.1033
84.6	-63.324						84.6	-65.4602				84.6	-72.3267						84.6	-62.0117
84.65	-63.2935						84.65	-65.3686				84.65	-74.7681						84.65	-61.9812
84.7	-63.2019						84.7	-65.1855				84.7	-71.4111						84.7	-61.7065
84.75	-63.0493						84.75	-65.1245				84.75	-74.4629						84.75	-61.9812
84.8	-63.0188						84.8	-65.2466				84.8	-72.6318						84.8	-62.1033
84.85	-62.9883						84.85	-65.4297				84.85	-75.3784						84.85	-61.9202
84.9	-63.0188						84.9	-65.4297				84.9	-72.6318						84.9	-61.7065
84.95	-63.2019						84.95	-65.4602				84.95	-75.0732						84.95	-62.0422
85	-63.3545						85	-65.4297				85	-73.2422						85	-62.0117
85.05	-63.2324						85.05	-65.4297				85.05	-75.6836						85.05	-62.0422
85.1	-63.2324						85.1	-65.4297				85.1	-73.5474						85.1	-61.7371
85.15	-63.1714						85.15	-65.3076				85.15	-76.2939						85.15	-62.0117
85.2	-63.2019						85.2	-65.2771				85.2	-73.5474						85.2	-62.1643
85.25	-63.1714						85.25	-65.094				85.25	-76.9043						85.25	-62.0728
85.3	-62.9883						85.3	-65.094				85.3	-73.2422						85.3	-61.8591
85.35	-62.9578						85.35	-65.094				85.35	-76.2939						85.35	-61.8896
85.4	-63.2324						85.4	-65.2466				85.4	-74.1577						85.4	-62.2253
85.45	-63.3545						85.45	-65.3992				85.45	-77.5146						85.45	-62.1033
85.5	-63.2324						85.5	-65.4602				85.5	-74.1577						85.5	-62.0422
85.55	-63.1103						85.55	-65.4907				85.55	-76.9043						85.55	-61.7065
85.6	-62.9272						85.6	-65.5212				85.6	-73.8525						85.6	-62.0422
85.65	-63.324						85.65	-65.3992				85.65	-77.5146						85.65	-62.1948
85.7	-63.2629						85.7	-65.4297				85.7	-73.8525						85.7	-62.1643
85.75	-63.1409						85.75	-65.3686				85.75	-76.5991						85.75	-61.8286
85.8	-62.9578						85.8	-65.3686				85.8	-74.1577						85.8	-61.7065
85.85	-63.3545						85.85	-65.2771				85.85	-77.5146						85.85	-62.2253
85.9	-63.2324						85.9	-65.2161				85.9	-74.4629						85.9	-62.1643
85.95	-62.8967						85.95	-65.1245				85.95	-76.9043						85.95	-62.0117
86	-63.2935						86	-65.2161				86	-75.0732						86	-61.8591
86.05	-63.324						86.05	-65.0635				86.05	-77.2095						86.05	-61.8896
86.1	-62.9578						86.1	-65.0635				86.1	-75.3784						86.1	-62.1338
86.15	-63.3545						86.15	-65.1855				86.15	-77.2095						86.15	-62.0422
86.2	-63.385						86.2	-65.3381				86.2	-78.125						86.2	-61.9812
86.25	-63.0188						86.25	-65.3381				86.25	-77.2095						86.25	-61.8286
86.3	-63.2935						86.3	-65.2771				86.3	-77.5146						86.3	-61.8286
86.35	-63.3545						86.35	-65.2771				86.35	-76.2939						86.35	-61.9507
86.4	-63.0188						86.4	-65.2771				86.4	-78.7354						86.4	-62.1033
86.45	-63.446						86.45	-65.2771				86.45	-76.2939						86.45	-62.0117
86.5	-63.0798						86.5	-65.2161				86.5	-79.0405						86.5	-61.9202
86.55	-63.0798						86.55	-65.1245				86.55	-75.9888						86.55	-61.676
86.6	-63.324						86.6	-64.9719				86.6	-79.9561						86.6	-61.9507
86.65	-62.8967						86.65	-65.155				86.65	-75.6836						86.65	-62.0728
86.7	-63.2019						86.7	-65.3076				86.7	-78.4302						86.7	-62.0422
86.75	-63.2935						86.75	-65.1855				86.75	-75.6836						86.75	-62.0117
86.8	-62.8357						86.8	-65.1245				86.8	-78.7354						86.8	-61.7981
86.85	-63.324						86.85	-64.8804				86.85	-76.9043						86.85	-61.9202
86.9	-63.2324						86.9	-65.094				86.9	-79.0405						86.9	-62.0728
86.95	-62.8357						86.95	-65.2466				86.95	-78.4302						86.95	-62.1948
87	-63.385						87	-65.2161				87	-77.5146						87	-62.1033
87.05	-63.1409						87.05	-64.9109				87.05	-79.3457						87.05	-61.9507
87.1	-62.9272						87.1	-65.1245				87.1	-77.5146						87.1	-61.7371
87.15	-63.2324						87.15	-65.1245				87.15	-79.6509						87.15	-61.9202
87.2	-63.1409						87.2	-65.0024				87.2	-76.5991						87.2	-62.1948
87.25	-62.8052						87.25	-65.0635				87.25	-79.6509						87.25	-62.1338
87.3	-63.2019						87.3	-65.1855				87.3	-77.8198						87.3	-62.1033
87.35	-63.1714						87.35	-65.033				87.35	-79.0405						87.35	-62.0117
87.4	-62.8662						87.4	-64.8804				87.4	-79.0405						87.4	-61.7676
87.45	-63.1409						87.45	-65.1855				87.45	-79.0405						87.45	-61.9202
87.5	-63.2019						87.5	-64.9719				87.5	-80.2612						87.5	-62.1338
87.55	-63.0493						87.55	-64.8498				87.55	-77.5146						87.55	-62.2559
87.6	-62.8662						87.6	-65.2161				87.6	-79.9561						87.6	-62.1033
87.65	-63.2324						87.65	-65.033				87.65	-78.125						87.65	-62.0728
87.7	-63.1409						87.7	-64.8498				87.7	-79.9561						87.7	-61.9202
87.75	-62.7747						87.75	-65.1855				87.75	-77.8198						87.75	-61.8896
87.8	-63.0493						87.8	-65.0024				87.8	-79.0405						87.8	-62.0117
87.85	-63.1714						87.85	-64.8193				87.85	-80.5664						87.85	-62.1338
87.9	-63.0188						87.9	-65.033				87.9	-79.0405						87.9	-62.2253
87.95	-62.8662						87.95	-65.0024				87.95	-80.5664						87.95	-62.1643
88	-63.1409						88	-64.6973				88	-77.2095						88	-62.0728
88.05	-63.1714						88.05	-65.1245				88.05	-80.5664						88.05	-61.9812
88.1	-63.0188						88.1	-65.094				88.1	-78.4302						88.1	-61.8286
88.15	-62.9578						88.15	-64.7888				88.15	-79.6509						88.15	-61.9507
88.2	-63.1409						88.2	-65.0024				88.2	-79.9561						88.2	-62.1338
88.25	-63.0798						88.25	-65.094				88.25	-79.0405						88.25	-62.1643
88.3	-62.8052						88.3	-64.9719				88.3	-81.1768						88.3	-62.2253
88.35	-62.9883						88.35	-64.6973				88.35	-78.4302						88.35	-62.1033
88.4	-63.1409						88.4	-65.094				88.4	-79.6509						88.4	-62.0422
88.45	-63.0798						88.45	-65.033				88.45	-80.5664						88.45	-61.8591
88.5	-62.7136						88.5	-64.7888				88.5	-79.9561						88.5	-61.9507
88.55	-62.9578						88.55	-64.7278				88.55	-81.1768						88.55	-61.9507
88.6	-63.1103						88.6	-65.0635				88.6	-77.5146						88.6	-62.1643
88.65	-63.0493						88.65	-65.033				88.65	-80.5664						88.65	-62.1948
88.7	-62.6221						88.7	-64.8193				88.7	-79.9561						88.7	-62.2864
88.75	-63.0188						88.75	-64.7278				88.75	-79.3457						88.75	-62.1643
88.8	-63.1103						88.8	-65.0635				88.8	-80.8716						88.8	-62.1338
88.85	-63.0188						88.85	-64.9109				88.85	-78.4302						88.85	-62.0728
88.9	-62.7441						88.9	-64.7888				88.9	-81.4819						88.9	-62.0728
88.95	-62.9883						88.95	-64.6973				88.95	-79.3457						88.95	-61.9202
89	-63.1103						89	-64.9719				89	-79.6509						89	-62.0422
89.05	-63.0493						89.05	-64.9109				89.05	-81.1768						89.05	-62.1643
89.1	-62.8052						89.1	-64.7583				89.1	-78.7354						89.1	-62.3779
89.15	-62.8052						89.15	-64.4836				89.15	-80.5664						89.15	-62.2864
89.2	-63.0798						89.2	-64.8193				89.2	-80.2612						89.2	-62.1643
89.25	-63.1103						89.25	-64.9414				89.25	-79.0405						89.25	-62.1948
89.3	-62.9272						89.3	-64.8498				89.3	-82.0923						89.3	-62.1948
89.35	-62.7441						89.35	-64.6057				89.35	-78.4302						89.35	-62.0728
89.4	-63.0798						89.4	-64.6667				89.4	-79.9561						89.4	-61.9202
89.45	-63.1103						89.45	-64.9414				89.45	-81.1768						89.45	-61.9507
89.5	-63.0798						89.5	-64.9109				89.5	-79.0405						89.5	-62.0117
89.55	-62.6831						89.55	-64.6667				89.55	-80.5664						89.55	-62.1948
89.6	-62.9883						89.6	-64.5447				89.6	-78.4302						89.6	-62.2864
89.65	-63.1409						89.65	-64.8498				89.65	-80.2612						89.65	-62.2253
89.7	-63.1714						89.7	-64.9414				89.7	-81.4819						89.7	-62.1948
89.75	-62.8357						89.75	-64.8498				89.75	-77.5146						89.75	-62.1033
89.8	-62.8662						89.8	-64.6973				89.8	-80.8716						89.8	-61.9507
89.85	-63.1409						89.85	-64.6057				89.85	-80.8716						89.85	-61.9507
89.9	-63.1714						89.9	-64.8498				89.9	-78.125						89.9	-62.2864
89.95	-63.0493						89.95	-64.7583				89.95	-80.5664						89.95	-62.2864
90	-62.8052						90	-64.7278				90	-78.7354						90	-62.1643
90.05	-62.9272						90.05	-64.5447				90.05	-79.3457						90.05	-61.8591
90.1	-63.1714						90.1	-64.6057				90.1	-81.1768						90.1	-62.0728
90.15	-63.1103						90.15	-64.8193				90.15	-77.8198						90.15	-62.2559
90.2	-63.0188						90.2	-64.7583				90.2	-79.3457						90.2	-62.0728
90.25	-62.8052						90.25	-64.7888				90.25	-80.2612						90.25	-61.8591
90.3	-62.9578						90.3	-64.6057				90.3	-77.8198						90.3	-62.2559
90.35	-63.2324						90.35	-64.5142				90.35	-80.2612						90.35	-62.1948
90.4	-63.1409						90.4	-64.7583				90.4	-76.5991						90.4	-61.7371
90.45	-63.1103						90.45	-64.8804				90.45	-79.0405						90.45	-62.1338
90.5	-62.8967						90.5	-64.8193				90.5	-78.7354						90.5	-62.1643
90.55	-62.9578						90.55	-64.6362				90.55	-77.2095						90.55	-61.7676
90.6	-63.2019						90.6	-64.4531				90.6	-79.6509						90.6	-62.1643
90.65	-63.1714						90.65	-64.7278				90.65	-77.5146						90.65	-62.0728
90.7	-63.2324						90.7	-64.8804				90.7	-79.6509						90.7	-61.8286
90.75	-63.0798						90.75	-64.8193				90.75	-76.9043						90.75	-62.1948
90.8	-62.8967						90.8	-64.7888				90.8	-79.3457						90.8	-61.9812
90.85	-63.1714						90.85	-64.5752				90.85	-76.5991						90.85	-61.8591
90.9	-63.324						90.9	-64.6057				90.9	-79.0405						90.9	-62.1338
90.95	-63.2935						90.95	-64.8498				90.95	-76.5991						90.95	-61.8896
91	-63.1409						91	-64.9109				91	-77.5146						91	-62.0422
91.05	-62.9272						91.05	-64.9109				91.05	-76.2939						91.05	-62.0728
91.1	-63.1103						91.1	-64.8193				91.1	-77.5146						91.1	-61.8286
91.15	-63.3545						91.15	-64.6973				91.15	-76.5991						91.15	-62.0728
91.2	-63.385						91.2	-64.6973				91.2	-75.0732						91.2	-62.1643
91.25	-63.3545						91.25	-64.9719				91.25	-76.5991						91.25	-61.7981
91.3	-63.2629						91.3	-65.0635				91.3	-75.3784						91.3	-62.1643
91.35	-63.1103						91.35	-64.9719				91.35	-77.2095						91.35	-62.1338
91.4	-63.0493						91.4	-64.8804				91.4	-75.0732						91.4	-61.7981
91.45	-63.324						91.45	-64.8498				91.45	-75.6836						91.45	-62.0728
91.5	-63.446						91.5	-64.7278				91.5	-76.5991						91.5	-62.1338
91.55	-63.4155						91.55	-64.8498				91.55	-73.8525						91.55	-61.7371
91.6	-63.324						91.6	-65.0635				91.6	-76.9043						91.6	-62.0117
91.65	-63.0798						91.65	-65.033				91.65	-72.937						91.65	-62.0728
91.7	-63.1409						91.7	-65.0024				91.7	-76.5991						91.7	-61.9202
91.75	-63.324						91.75	-65.0024				91.75	-74.7681						91.75	-61.8896
91.8	-63.4155						91.8	-64.7278				91.8	-73.2422						91.8	-62.2253
91.85	-63.5071						91.85	-64.8498				91.85	-75.6836						91.85	-62.1643
91.9	-63.4766						91.9	-65.1245				91.9	-73.5474						91.9	-61.7981
91.95	-63.385						91.95	-65.155				91.95	-75.3784						91.95	-62.1033
92	-63.1103						92	-65.1245				92	-74.4629						92	-62.1643
92.05	-63.1103						92.05	-65.155				92.05	-73.5474						92.05	-62.0422
92.1	-63.446						92.1	-65.1245				92.1	-75.0732						92.1	-61.8591
92.15	-63.5681						92.15	-64.9414				92.15	-72.937						92.15	-62.2864
92.2	-63.5376						92.2	-64.8804				92.2	-74.7681						92.2	-62.2559
92.25	-63.5071						92.25	-65.0635				92.25	-72.0215						92.25	-62.0117
92.3	-63.446						92.3	-65.3381				92.3	-74.7681						92.3	-61.9812
92.35	-63.324						92.35	-65.3076				92.35	-73.5474						92.35	-62.2559
92.4	-63.1409						92.4	-65.2161				92.4	-73.8525						92.4	-62.1948
92.45	-63.2935						92.45	-65.3381				92.45	-74.1577						92.45	-61.8896
92.5	-63.5376						92.5	-65.1245				92.5	-71.7163						92.5	-62.1033
92.55	-63.6291						92.55	-65.033				92.55	-73.8525						92.55	-62.3474
92.6	-63.5376						92.6	-65.0024				92.6	-71.4111						92.6	-62.2253
92.65	-63.4766						92.65	-65.0635				92.65	-74.4629						92.65	-61.9812
92.7	-63.4766						92.7	-65.2466				92.7	-71.106						92.7	-62.1948
92.75	-63.3545						92.75	-65.2771				92.75	-74.7681						92.75	-62.3779
92.8	-63.2019						92.8	-65.3992				92.8	-70.1904						92.8	-62.2253
92.85	-63.324						92.85	-65.3381				92.85	-74.1577						92.85	-61.9812
92.9	-63.5071						92.9	-65.3686				92.9	-71.106						92.9	-62.1948
92.95	-63.6902						92.95	-65.1855				92.95	-73.2422						92.95	-62.3474
93	-63.5986						93	-65.1855				93	-70.8008						93	-62.3169
93.05	-63.5986						93.05	-65.155				93.05	-72.6318						93.05	-61.9812
93.1	-63.5681						93.1	-65.1855				93.1	-71.106						93.1	-62.1643
93.15	-63.5376						93.15	-65.3686				93.15	-72.937						93.15	-62.5
93.2	-63.3545						93.2	-65.4602				93.2	-69.8853						93.2	-62.3169
93.25	-63.3545						93.25	-65.6433				93.25	-72.3267						93.25	-62.0728
93.3	-63.2629						93.3	-65.5212				93.3	-69.5801						93.3	-62.1033
93.35	-63.4155						93.35	-65.5518				93.35	-72.0215						93.35	-62.5305
93.4	-63.5071						93.4	-65.4602				93.4	-68.9697						93.4	-62.4084
93.45	-63.6291						93.45	-65.4602				93.45	-70.8008						93.45	-62.2253
93.5	-63.6902						93.5	-65.3992				93.5	-68.9697						93.5	-62.1033
93.55	-63.6597						93.55	-65.3686				93.55	-70.8008						93.55	-62.4084
93.6	-63.5986						93.6	-65.2771				93.6	-68.0542						93.6	-62.4084
93.65	-63.446						93.65	-65.3076				93.65	-70.1904						93.65	-62.3474
93.7	-63.324						93.7	-65.4602				93.7	-67.749						93.7	-62.0422
93.75	-63.2324						93.75	-65.6433				93.75	-69.5801						93.75	-62.3779
93.8	-63.5681						93.8	-65.6738				93.8	-67.1387						93.8	-62.5915
93.85	-63.5986						93.85	-65.7349				93.85	-68.9697						93.85	-62.5
93.9	-63.5681						93.9	-65.7043				93.9	-66.2231						93.9	-62.2559
93.95	-63.385						93.95	-65.7654				93.95	-67.749						93.95	-62.2253
94	-63.3545						94	-65.7043				94	-65.6128						94	-62.5915
94.05	-63.6291						94.05	-65.6433				94.05	-67.749						94.05	-62.561
94.1	-63.5986						94.1	-65.6433				94.1	-64.6973						94.1	-62.5
94.15	-63.2629						94.15	-65.6433				94.15	-67.1387						94.15	-62.3474
94.2	-63.5376						94.2	-65.5212				94.2	-64.6973						94.2	-62.3169
94.25	-63.5986						94.25	-65.5212				94.25	-66.5283						94.25	-62.5305
94.3	-63.4766						94.3	-65.4602				94.3	-64.3921						94.3	-62.6221
94.35	-63.3545						94.35	-65.4602				94.35	-66.8335						94.35	-62.5915
94.4	-63.6902						94.4	-65.4602				94.4	-64.0869						94.4	-62.2559
94.45	-63.4766						94.45	-65.5518				94.45	-65.6128						94.45	-62.2559
94.5	-63.4155						94.5	-65.7349				94.5	-63.4766						94.5	-62.6526
94.55	-63.6597						94.55	-65.8264				94.55	-65.0024						94.55	-62.7441
94.6	-63.4155						94.6	-65.8264				94.6	-63.4766						94.6	-62.6221
94.65	-63.5071						94.65	-65.8264				94.65	-63.7817						94.65	-62.3779
94.7	-63.6902						94.7	-65.8874				94.7	-64.3921						94.7	-62.3169
94.75	-63.3545						94.75	-65.8874				94.75	-64.3921						94.75	-62.5915
94.8	-63.7207						94.8	-65.8569				94.8	-64.3921						94.8	-62.6526
94.85	-63.6902						94.85	-65.7043				94.85	-61.6455						94.85	-62.5915
94.9	-63.3545						94.9	-65.7654				94.9	-63.1714						94.9	-62.3779
94.95	-63.7512						94.95	-65.5823				94.95	-62.2559						94.95	-62.1948
95	-63.5376						95	-65.7959				95	-64.0869						95	-62.4695
95.05	-63.5071						95.05	-65.8569				95.05	-60.4248						95.05	-62.5915
95.1	-63.6902						95.1	-65.9485				95.1	-63.1714						95.1	-62.5
95.15	-63.5986						95.15	-65.7349				95.15	-60.1196						95.15	-62.5
95.2	-63.6597						95.2	-65.5212				95.2	-62.8662						95.2	-62.3474
95.25	-63.6902						95.25	-65.918				95.25	-59.8145						95.25	-62.2864
95.3	-63.4766						95.3	-65.9485				95.3	-61.3403						95.3	-62.4084
95.35	-63.6902						95.35	-65.7349				95.35	-59.2041						95.35	-62.561
95.4	-63.6597						95.4	-65.6738				95.4	-60.73						95.4	-62.5305
95.45	-63.5071						95.45	-66.0095				95.45	-60.1196						95.45	-62.4695
95.5	-63.5986						95.5	-66.0705				95.5	-59.2041						95.5	-62.2864
95.55	-63.8123						95.55	-65.6433				95.55	-60.1196						95.55	-62.1338
95.6	-63.6902						95.6	-65.918				95.6	-58.8989						95.6	-62.3779
95.65	-63.5376						95.65	-65.8874				95.65	-59.5093						95.65	-62.561
95.7	-63.8733						95.7	-65.7043				95.7	-57.0679						95.7	-62.439
95.75	-63.7817						95.75	-65.9485				95.75	-59.8145						95.75	-62.4084
95.8	-63.446						95.8	-65.918				95.8	-57.0679						95.8	-62.3779
95.85	-63.9343						95.85	-65.6128				95.85	-57.9834						95.85	-62.1948
95.9	-63.8733						95.9	-65.8874				95.9	-55.8472						95.9	-62.2864
95.95	-63.7207						95.95	-65.918				95.95	-57.6782						95.95	-62.5
96	-63.8123						96	-65.5518				96	-57.6782						96	-62.561
96.05	-64.0259						96.05	-65.8874				96.05	-56.1523						96.05	-62.561
96.1	-63.8123						96.1	-66.0705				96.1	-58.2886						96.1	-62.4695
96.15	-63.6902						96.15	-65.6738				96.15	-55.542						96.15	-62.3169
96.2	-64.0564						96.2	-65.8569				96.2	-57.6782						96.2	-62.2864
96.25	-63.9038						96.25	-65.9485				96.25	-54.3213						96.25	-62.4084
96.3	-63.7817						96.3	-65.7043				96.3	-56.1523						96.3	-62.439
96.35	-63.7512						96.35	-65.8264				96.35	-55.2368						96.35	-62.5915
96.4	-64.1174						96.4	-65.918				96.4	-55.2368						96.4	-62.5915
96.45	-63.9954						96.45	-65.7349				96.45	-55.2368						96.45	-62.439
96.5	-63.8123						96.5	-65.6128				96.5	-54.0161						96.5	-62.3169
96.55	-63.9648						96.55	-66.0095				96.55	-56.7627						96.55	-62.1643
96.6	-64.1479						96.6	-65.8569				96.6	-52.7954						96.6	-62.1338
96.65	-63.9954						96.65	-65.6128				96.65	-55.2368						96.65	-62.2559
96.7	-63.7207						96.7	-65.7959				96.7	-52.1851						96.7	-62.4084
96.75	-63.9954						96.75	-65.918				96.75	-54.3213						96.75	-62.3779
96.8	-64.1479						96.8	-65.7654				96.8	-54.3213						96.8	-62.4084
96.85	-64.0259						96.85	-65.5212				96.85	-51.8799						96.85	-62.4084
96.9	-63.7207						96.9	-65.7654				96.9	-54.0161						96.9	-62.2864
96.95	-64.0259						96.95	-65.8569				96.95	-51.5747						96.95	-62.1643
97	-64.1785						97	-65.6128				97	-53.1006						97	-62.1338
97.05	-64.0869						97.05	-65.4602				97.05	-53.1006						97.05	-62.1643
97.1	-63.7512						97.1	-65.8569				97.1	-51.8799						97.1	-62.3474
97.15	-64.0869						97.15	-65.7654				97.15	-53.7109						97.15	-62.4084
97.2	-64.1479						97.2	-65.6433				97.2	-50.9644						97.2	-62.5
97.25	-64.0869						97.25	-65.3686				97.25	-52.1851						97.25	-62.3474
97.3	-63.8428						97.3	-65.7349				97.3	-50.0488						97.3	-62.3474
97.35	-63.9648						97.35	-65.7043				97.35	-51.2695						97.35	-62.3474
97.4	-64.209						97.4	-65.6433				97.4	-52.1851						97.4	-62.2559
97.45	-64.209						97.45	-65.3076				97.45	-50.354						97.45	-62.1643
97.5	-63.9954						97.5	-65.5823				97.5	-52.1851						97.5	-62.0422
97.55	-63.9343						97.55	-65.7043				97.55	-49.7437						97.55	-62.1338
97.6	-64.2395						97.6	-65.7043				97.6	-51.2695						97.6	-62.3474
97.65	-64.3005						97.65	-65.3686				97.65	-51.5747						97.65	-62.4084
97.7	-64.1479						97.7	-65.4907				97.7	-49.1333						97.7	-62.439
97.75	-63.9038						97.75	-65.6738				97.75	-51.2695						97.75	-62.4695
97.8	-64.209						97.8	-65.6738				97.8	-49.4385						97.8	-62.4695
97.85	-64.3616						97.85	-65.5212				97.85	-50.9644						97.85	-62.439
97.9	-64.209						97.9	-65.3076				97.9	-50.9644						97.9	-62.2864
97.95	-64.0259						97.95	-65.4907				97.95	-47.3022						97.95	-62.1643
98	-63.9954						98	-65.6738				98	-50.6592						98	-62.1948
98.05	-64.331						98.05	-65.6128				98.05	-48.8281						98.05	-62.3474
98.1	-64.27						98.1	-65.3992				98.1	-49.7437						98.1	-62.4084
98.15	-64.209						98.15	-65.3076				98.15	-50.354						98.15	-62.5
98.2	-64.1174						98.2	-65.5518				98.2	-47.6074						98.2	-62.5
98.25	-64.0564						98.25	-65.4297				98.25	-50.0488						98.25	-62.3169
98.3	-64.3005						98.3	-65.3686				98.3	-48.2178						98.3	-62.1033
98.35	-64.2395						98.35	-65.2771				98.35	-47.3022						98.35	-62.4084
98.4	-64.331						98.4	-65.2466				98.4	-50.0488						98.4	-62.4084
98.45	-64.0259						98.45	-65.4907				98.45	-47.3022						98.45	-62.2253
98.5	-64.1785						98.5	-65.3992				98.5	-49.4385						98.5	-61.9507
98.55	-64.3921						98.55	-65.3992				98.55	-49.7437						98.55	-62.4695
98.6	-64.4226						98.6	-65.2161				98.6	-47.6074						98.6	-62.3474
98.65	-64.2395						98.65	-65.2161				98.65	-50.0488						98.65	-62.0728
98.7	-64.1479						98.7	-65.4297				98.7	-47.6074						98.7	-62.2559
98.75	-64.0564						98.75	-65.3992				98.75	-48.8281						98.75	-62.3779
98.8	-64.4836						98.8	-65.3686				98.8	-49.7437						98.8	-62.0422
98.85	-64.3616						98.85	-65.1855				98.85	-48.8281						98.85	-62.3474
98.9	-64.331						98.9	-65.094				98.9	-50.0488						98.9	-62.3474
98.95	-64.0564						98.95	-65.4602				98.95	-48.2178						98.95	-61.9507
99	-64.0259						99	-65.4297				99	-50.9644						99	-62.439
99.05	-64.27						99.05	-65.3686				99.05	-48.2178						99.05	-62.3474
99.1	-64.3921						99.1	-65.1855				99.1	-50.9644						99.1	-61.9507
99.15	-64.3616						99.15	-65.033				99.15	-48.2178						99.15	-62.3779
99.2	-64.209						99.2	-65.2466				99.2	-51.8799						99.2	-62.2864
99.25	-63.9343						99.25	-65.4602				99.25	-48.8281						99.25	-62.1338
99.3	-64.0564						99.3	-65.3381				99.3	-50.354						99.3	-62.2559
99.35	-64.3005						99.35	-65.4602				99.35	-50.0488						99.35	-62.0422
99.4	-64.3616						99.4	-65.2161				99.4	-50.6592						99.4	-62.1948
99.45	-64.2395						99.45	-65.1245				99.45	-50.9644						99.45	-62.3169
99.5	-64.0564						99.5	-65.3992				99.5	-49.1333						99.5	-62.0117
99.55	-63.9343						99.55	-65.5518				99.55	-51.8799						99.55	-62.3169
99.6	-64.1174						99.6	-65.4602				99.6	-50.354						99.6	-62.3474
99.65	-64.3005						99.65	-65.4297				99.65	-52.4902						99.65	-61.9812
99.7	-64.2395						99.7	-65.155				99.7	-51.5747						99.7	-62.2864
99.75	-64.1785						99.75	-65.1855				99.75	-51.2695						99.75	-62.3169
99.8	-64.0869						99.8	-65.3686				99.8	-53.1006						99.8	-61.9812
99.85	-64.0259						99.85	-65.4602				99.85	-50.354						99.85	-62.2864
[truncated: 63,536 more rows]

## Sheet: Fig 1 suppl 7c
		sf ap/s						VS											sf ap/s					vs		VS
0																										--
0.25																										--
0.5		2	1	0.5	0.1	0	4	--	0.1	-	0.04	0.1	0.16	0.02					2	1	0.5	1		0.04	-	-	-
0.6		5	10	--	0.5	0.5	8	--	0.16	0.06	--	0.15	--	--					--	20	15	10		--	0.3	0.3	0.2
0.7		10	25	7.5	14	15	20	--	0.2	0.12	0.14	0.23	0.2	0.5					10	50	12	25		0.3	0.6	0.27	0.32
0.8		16	100	20	20	75	65	--	0.26	0.18	--	0.3	0.32	--					6	15	5	50		0.15	0.4	0.12	0.5
0.9		24	250	50	27	85	115	--	0.4	0.34	0.23	0.38	0.42	0.72					4	2	1	15		0.1	0.06	0.01	0.24
1

## Sheet: Fig 1 suppl 7d
		sf ap/s						VS											sf ap/s					vs		VS
0																										--
0.25																										--
0.5		2	1	0.5	0.1	0	4	--	0.1	-	0.04	0.1	0.16	0.02					2	1	0.5	1		0.04	-	-	-
0.6		5	10	--	0.5	0.5	8	--	0.16	0.06	--	0.15	--	--					--	20	15	10		--	0.3	0.3	0.2
0.7		10	25	7.5	14	15	20	--	0.2	0.12	0.14	0.23	0.2	0.5					10	50	12	25		0.3	0.6	0.27	0.32
0.8		16	100	20	20	75	65	--	0.26	0.18	--	0.3	0.32	--					6	15	5	50		0.15	0.4	0.12	0.5
0.9		24	250	50	27	85	115	--	0.4	0.34	0.23	0.38	0.42	0.72					4	2	1	15		0.1	0.06	0.01	0.24
1

## Sheet: Fig 1 suppl 7e
t(ms)	mp (mV)			1, 10 and 100 Hz mech sti				t(ms)	mp(mV)	0.6 um	1, 10 and 100 Hz mech sti				t (ms)	mp (mV)		1, 10 and 100 Hz mech sti
0	-58.96							0	-66.1316						0	-56.9458
0.05	-58.9905							0.05	-66.04						0.05	-57.0068
0.1	-58.6548							0.1	-66.0095						0.1	-57.2815
0.15	-58.7769							0.15	-65.8569						0.15	-57.2205
0.2	-58.9294							0.2	-65.6738						0.2	-57.1289
0.25	-58.8074							0.25	-65.7959						0.25	-57.0984
0.3	-58.6548							0.3	-66.1316						0.3	-56.9458
0.35	-59.021							0.35	-66.1621						0.35	-56.9153
0.4	-58.8684							0.4	-66.1621						0.4	-57.1289
0.45	-58.6548							0.45	-65.918						0.45	-57.1899
0.5	-58.8684							0.5	-65.8264						0.5	-57.1594
0.55	-58.96							0.55	-65.7043						0.55	-57.2205
0.6	-58.8684							0.6	-65.8264						0.6	-57.0068
0.65	-58.7158							0.65	-66.0095						0.65	-56.8542
0.7	-59.082							0.7	-66.1011						0.7	-57.0373
0.75	-58.96							0.75	-66.0705						0.75	-57.1899
0.8	-58.7158							0.8	-65.9485						0.8	-57.251
0.85	-58.7158							0.85	-65.8874						0.85	-57.2205
0.9	-59.0515							0.9	-65.6433						0.9	-57.1899
0.95	-58.9294							0.95	-65.6738						0.95	-57.1594
1	-58.6853							1	-65.7959						1	-56.9153
1.05	-58.7463							1.05	-66.1316						1.05	-57.0373
1.1	-59.021							1.1	-66.04						1.1	-57.312
1.15	-58.96							1.15	-66.0705						1.15	-57.373
1.2	-58.5022							1.2	-66.0095						1.2	-57.251
1.25	-58.8074							1.25	-65.8874						1.25	-57.2815
1.3	-58.96							1.3	-65.7959						1.3	-57.1594
1.35	-58.9294							1.35	-65.6128						1.35	-56.9458
1.4	-58.5022							1.4	-65.8264						1.4	-57.0984
1.45	-58.7463							1.45	-65.8874						1.45	-57.251
1.5	-58.9905							1.5	-66.0705						1.5	-57.0679
1.55	-58.8989							1.55	-66.0705						1.55	-57.0679
1.6	-58.6548							1.6	-66.1316						1.6	-57.0984
1.65	-58.7463							1.65	-66.0705						1.65	-57.2815
1.7	-59.021							1.7	-66.1011						1.7	-57.2205
1.75	-58.9905							1.75	-65.8569						1.75	-57.0068
1.8	-58.6853							1.8	-65.7654						1.8	-57.2205
1.85	-58.6853							1.85	-65.8569						1.85	-57.2205
1.9	-59.1125							1.9	-66.0705						1.9	-57.0679
1.95	-59.0515							1.95	-66.1316						1.95	-57.1899
2	-58.7158							2	-66.1621						2	-57.373
2.05	-58.6243							2.05	-65.918						2.05	-56.9763
2.1	-58.96							2.1	-65.8264						2.1	-57.2815
2.15	-59.082							2.15	-66.1621						2.15	-57.2815
2.2	-58.8684							2.2	-66.1621						2.2	-56.9153
2.25	-58.5937							2.25	-65.918						2.25	-57.3425
2.3	-58.8989							2.3	-66.04						2.3	-57.1594
2.35	-59.082							2.35	-66.1926						2.35	-57.0373
2.4	-58.9905							2.4	-66.0095						2.4	-57.251
2.45	-58.7463							2.45	-66.1011						2.45	-56.8848
2.5	-58.6853							2.5	-66.1926						2.5	-57.251
2.55	-58.96							2.55	-65.8874						2.55	-57.1594
2.6	-59.0515							2.6	-66.2537						2.6	-57.0984
2.65	-58.8989							2.65	-66.2537						2.65	-57.251
2.7	-58.5632							2.7	-65.8264						2.7	-56.9153
2.75	-58.7158							2.75	-66.2537						2.75	-57.2815
2.8	-59.0515							2.8	-66.04						2.8	-57.373
2.85	-59.021							2.85	-65.979						2.85	-57.0068
2.9	-58.8989							2.9	-66.2537						2.9	-57.312
2.95	-58.7769							2.95	-65.7959						2.95	-57.1289
3	-58.7769							3	-66.1621						3	-57.1899
3.05	-59.082							3.05	-66.1316						3.05	-57.373
3.1	-59.0515							3.1	-65.8264						3.1	-57.0679
3.15	-59.021							3.15	-66.2537						3.15	-57.2815
3.2	-58.8379							3.2	-65.979						3.2	-57.4036
3.25	-58.8074							3.25	-66.0705						3.25	-57.0679
3.3	-59.1431							3.3	-66.2537						3.3	-57.2815
3.35	-59.1736							3.35	-66.0095						3.35	-57.2815
3.4	-59.1125							3.4	-66.1011						3.4	-57.0068
3.45	-58.8684							3.45	-66.2842						3.45	-57.2815
3.5	-58.7769							3.5	-65.918						3.5	-57.2815
3.55	-59.0515							3.55	-66.1316						3.55	-56.9458
3.6	-59.1736							3.6	-66.2537						3.6	-57.0984
3.65	-59.1125							3.65	-66.1011						3.65	-57.2815
3.7	-59.021							3.7	-66.0705						3.7	-57.0373
3.75	-58.8684							3.75	-66.2842						3.75	-57.1899
3.8	-58.9905							3.8	-66.1011						3.8	-57.312
3.85	-59.2346							3.85	-66.04						3.85	-57.251
3.9	-59.2346							3.9	-66.4062						3.9	-57.0373
3.95	-59.1125							3.95	-66.1621						3.95	-57.3425
4	-59.082							4	-65.8874						4	-57.312
4.05	-58.8379							4.05	-66.2842						4.05	-57.0984
4.1	-58.96							4.1	-66.3452						4.1	-57.4951
4.15	-59.2346							4.15	-65.979						4.15	-57.251
4.2	-59.3262							4.2	-66.0095						4.2	-57.1594
4.25	-59.1736							4.25	-66.2537						4.25	-57.1899
4.3	-59.082							4.3	-66.1316						4.3	-57.4036
4.35	-58.8989							4.35	-65.7654						4.35	-57.312
4.4	-59.021							4.4	-66.1926						4.4	-56.9153
4.45	-59.2957							4.45	-66.1011						4.45	-57.3425
4.5	-59.2346							4.5	-65.979						4.5	-57.373
4.55	-59.2346							4.55	-66.0095						4.55	-57.1594
4.6	-59.2346							4.6	-66.2537						4.6	-57.1899
4.65	-59.0515							4.65	-66.1926						4.65	-57.2815
4.7	-58.8379							4.7	-65.8264						4.7	-57.2815
4.75	-59.0515							4.75	-66.1621						4.75	-56.9458
4.8	-59.2957							4.8	-66.1316						4.8	-57.312
4.85	-59.2957							4.85	-66.0705						4.85	-57.251
4.9	-59.2651							4.9	-65.8264						4.9	-57.2205
4.95	-59.1431							4.95	-66.1926						4.95	-57.0373
5	-58.9905							5	-66.1926						5	-57.3425
5.05	-58.8074							5.05	-66.04						5.05	-57.251
5.1	-59.082							5.1	-65.8569						5.1	-57.1594
5.15	-59.2957							5.15	-66.2537						5.15	-57.1899
5.2	-59.2957							5.2	-66.1621						5.2	-57.312
5.25	-59.3262							5.25	-65.9485						5.25	-57.2815
5.3	-59.2346							5.3	-65.9485						5.3	-56.9763
5.35	-59.1125							5.35	-66.2842						5.35	-57.1899
5.4	-58.96							5.4	-66.1621						5.4	-57.3425
5.45	-58.96							5.45	-66.04						5.45	-57.2205
5.5	-59.2041							5.5	-65.918						5.5	-56.9458
5.55	-59.2957							5.55	-66.2537						5.55	-57.1899
5.6	-59.4177							5.6	-66.1926						5.6	-57.373
5.65	-59.3567							5.65	-66.0705						5.65	-57.251
5.7	-59.2957							5.7	-65.8874						5.7	-56.8848
5.75	-59.2346							5.75	-66.2537						5.75	-57.251
5.8	-59.1125							5.8	-66.2231						5.8	-57.3425
5.85	-58.9905							5.85	-66.1621						5.85	-57.2815
5.9	-58.96							5.9	-65.8874						5.9	-56.9458
5.95	-59.1431							5.95	-66.1316						5.95	-57.312
6	-59.2957							6	-66.2231						6	-57.3425
6.05	-59.3262							6.05	-66.2231						6.05	-57.2815
6.1	-59.2957							6.1	-65.9485						6.1	-57.1289
6.15	-59.2957							6.15	-65.9485						6.15	-57.1899
6.2	-59.2041							6.2	-66.2537						6.2	-57.5561
6.25	-59.021							6.25	-66.1926						6.25	-57.3425
6.3	-58.96							6.3	-65.979						6.3	-57.1594
6.35	-59.2651							6.35	-65.7349						6.35	-57.0679
6.4	-59.2957							6.4	-66.0705						6.4	-57.3425
6.45	-59.2041							6.45	-66.2231						6.45	-57.312
6.5	-59.1431							6.5	-66.1621						6.5	-57.251
6.55	-58.9905							6.55	-65.8874						6.55	-56.9763
6.6	-59.2651							6.6	-65.8264						6.6	-57.1289
6.65	-59.2957							6.65	-66.0705						6.65	-57.312
6.7	-59.1736							6.7	-66.1926						6.7	-57.3425
6.75	-59.082							6.75	-66.1621						6.75	-57.1289
6.8	-59.4177							6.8	-65.918						6.8	-56.9763
6.85	-59.2957							6.85	-65.8569						6.85	-57.312
6.9	-59.0515							6.9	-66.2231						6.9	-57.3425
6.95	-59.4177							6.95	-66.2231						6.95	-57.373
7	-59.3567							7	-66.1926						7	-57.251
7.05	-58.9294							7.05	-65.979						7.05	-57.0984
7.1	-59.4482							7.1	-65.8569						7.1	-57.373
7.15	-59.3872							7.15	-66.3147						7.15	-57.373
7.2	-58.96							7.2	-66.2842						7.2	-57.3425
7.25	-59.4177							7.25	-66.1621						7.25	-57.2205
7.3	-59.2651							7.3	-66.04						7.3	-57.1289
7.35	-59.1431							7.35	-65.918						7.35	-57.3425
7.4	-59.4788							7.4	-66.1926						7.4	-57.3425
7.45	-59.1125							7.45	-66.2537						7.45	-57.3425
7.5	-59.2041							7.5	-66.2231						7.5	-57.1289
7.55	-59.4177							7.55	-66.1926						7.55	-57.0068
7.6	-58.96							7.6	-65.9485						7.6	-57.312
7.65	-59.4177							7.65	-65.9485						7.65	-57.373
7.7	-59.3262							7.7	-66.2842						7.7	-57.3425
7.75	-59.0515							7.75	-66.3147						7.75	-57.1594
7.8	-59.4482							7.8	-66.2537						7.8	-57.0068
7.85	-59.2957							7.85	-66.0705						7.85	-57.0984
7.9	-59.082							7.9	-65.8874						7.9	-57.373
7.95	-59.5703							7.95	-66.1011						7.95	-57.312
8	-59.5093							8	-66.3147						8	-57.2205
8.05	-59.0515							8.05	-66.2842						8.05	-57.2815
8.1	-59.5703							8.1	-66.2231						8.1	-57.0679
8.15	-59.4177							8.15	-66.1316						8.15	-57.1594
8.2	-59.1431							8.2	-65.8874						8.2	-57.312
8.25	-59.4788							8.25	-66.0705						8.25	-57.3425
8.3	-59.5703							8.3	-66.3147						8.3	-57.373
8.35	-59.1736							8.35	-66.3452						8.35	-57.1594
8.4	-59.4177							8.4	-66.3147						8.4	-56.9458
8.45	-59.4177							8.45	-66.1621						8.45	-57.1594
8.5	-59.2957							8.5	-65.979						8.5	-57.3425
8.55	-59.1736							8.55	-65.8874						8.55	-57.312
8.6	-59.5703							8.6	-66.1926						8.6	-57.251
8.65	-59.5703							8.65	-66.2842						8.65	-57.2205
8.7	-59.0515							8.7	-66.3147						8.7	-56.9763
8.75	-59.3872							8.75	-66.1926						8.75	-57.0679
8.8	-59.6008							8.8	-66.2231						8.8	-57.2205
8.85	-59.4177							8.85	-66.1316						8.85	-57.251
8.9	-59.1736							8.9	-65.9485						8.9	-57.2205
8.95	-59.5398							8.95	-66.1011						8.95	-57.2815
9	-59.5703							9	-66.3757						9	-57.1594
9.05	-59.3872							9.05	-66.4062						9.05	-56.9153
9.1	-59.3872							9.1	-66.3147						9.1	-57.1594
9.15	-59.6313							9.15	-66.2537						9.15	-57.2815
9.2	-59.6313							9.2	-66.2231						9.2	-57.3425
9.25	-59.2957							9.25	-66.0095						9.25	-57.3425
9.3	-59.5093							9.3	-65.918						9.3	-57.3425
9.35	-59.7229							9.35	-66.1621						9.35	-57.2205
9.4	-59.5703							9.4	-66.3757						9.4	-57.0068
9.45	-59.4177							9.45	-66.3452						9.45	-57.0679
9.5	-59.6008							9.5	-66.2537						9.5	-57.2205
9.55	-59.6924							9.55	-66.2231						9.55	-57.3425
9.6	-59.6619							9.6	-66.1011						9.6	-57.2815
9.65	-59.2957							9.65	-66.0705						9.65	-57.251
9.7	-59.6619							9.7	-65.8874						9.7	-57.1594
9.75	-59.8144							9.75	-65.8874						9.75	-56.8542
9.8	-59.6619							9.8	-66.1621						9.8	-57.2205
9.85	-59.3262							9.85	-66.2231						9.85	-57.2815
9.9	-59.6008							9.9	-66.3452						9.9	-57.251
9.95	-59.7839							9.95	-66.1621						9.95	-57.0068
10	-59.6924							10	-66.2842						10	-57.1899
10.05	-59.3872							10.05	-66.1621						10.05	-57.2815
10.1	-59.5703							10.1	-66.0705						10.1	-57.1899
10.15	-59.7534							10.15	-65.8569						10.15	-57.0679
10.2	-59.7534							10.2	-66.0705						10.2	-57.373
10.25	-59.6313							10.25	-66.2537						10.25	-57.251
10.3	-59.5093							10.3	-66.2842						10.3	-57.0068
10.35	-59.845							10.35	-66.2231						10.35	-57.4341
10.4	-59.845							10.4	-65.8569						10.4	-57.2205
10.45	-59.7534							10.45	-66.2537						10.45	-57.1594
10.5	-59.4788							10.5	-66.3147						10.5	-57.373
10.55	-59.7839							10.55	-66.1621						10.55	-57.0068
10.6	-59.9365							10.6	-65.8874						10.6	-57.4036
10.65	-59.906							10.65	-66.3452						10.65	-57.373
10.7	-59.6924							10.7	-66.3147						10.7	-57.0373
10.75	-59.5398							10.75	-65.8264						10.75	-57.3425
10.8	-59.8755							10.8	-66.2842						10.8	-57.1594
10.85	-59.845							10.85	-66.3757						10.85	-57.251
10.9	-59.8144							10.9	-65.918						10.9	-57.2815
10.95	-59.5093							10.95	-66.3147						10.95	-56.9458
11	-59.6619							11	-66.1926						11	-57.4036
11.05	-59.9365							11.05	-66.1011						11.05	-57.0984
11.1	-59.845							11.1	-66.4062						11.1	-57.1899
11.15	-59.7534							11.15	-65.918						11.15	-57.251
11.2	-59.4177							11.2	-66.3452						11.2	-57.0068
11.25	-59.6924							11.25	-66.3147						11.25	-57.3425
11.3	-59.9365							11.3	-66.0095						11.3	-57.251
11.35	-59.906							11.35	-66.2842						11.35	-57.0679
11.4	-59.845							11.4	-66.1621						11.4	-57.373
11.45	-59.4482							11.45	-66.1926						11.45	-57.2815
11.5	-59.7839							11.5	-66.3757						11.5	-57.1289
11.55	-59.967							11.55	-66.04						11.55	-57.2815
11.6	-59.8755							11.6	-66.2537						11.6	-57.1289
11.65	-59.845							11.65	-66.3147						11.65	-57.2205
11.7	-59.6619							11.7	-65.9485						11.7	-57.312
11.75	-59.7534							11.75	-66.3452						11.75	-57.1289
11.8	-59.906							11.8	-66.3147						11.8	-57.1899
11.85	-60.0586							11.85	-65.8874						11.85	-57.3425
11.9	-59.906							11.9	-66.1926						11.9	-57.1899
11.95	-59.845							11.95	-66.3757						11.95	-57.0984
12	-59.6008							12	-65.9485						12	-57.3425
12.05	-59.8144							12.05	-66.1011						12.05	-57.312
12.1	-60.0586							12.1	-66.3452						12.1	-57.1289
12.15	-60.0281							12.15	-66.1011						12.15	-57.4341
12.2	-59.9365							12.2	-65.979						12.2	-57.312
12.25	-59.7534							12.25	-66.2842						12.25	-57.1899
12.3	-59.6313							12.3	-66.3147						12.3	-57.5256
12.35	-59.8755							12.35	-65.9485						12.35	-57.4341
12.4	-60.0281							12.4	-66.2537						12.4	-57.1899
12.45	-59.9976							12.45	-66.3147						12.45	-57.4951
12.5	-59.9365							12.5	-66.1621						12.5	-57.5867
12.55	-59.845							12.55	-66.0705						12.55	-57.3425
12.6	-59.6924							12.6	-66.3757						12.6	-57.2815
12.65	-59.7839							12.65	-66.3147						12.65	-57.5561
12.7	-59.9976							12.7	-66.0095						12.7	-57.4951
12.75	-60.1501							12.75	-66.2842						12.75	-57.1289
12.8	-60.0586							12.8	-66.3452						12.8	-57.373
12.85	-59.9365							12.85	-66.2537						12.85	-57.4341
12.9	-59.8144							12.9	-66.0095						12.9	-57.4036
12.95	-59.7839							12.95	-66.4368						12.95	-57.2205
13	-59.9976							13	-66.3147						13	-57.5256
13.05	-60.1196							13.05	-66.1621						13.05	-57.4951
13.1	-60.0891							13.1	-66.0705						13.1	-57.2815
13.15	-60.1501							13.15	-66.4673						13.15	-57.4341
13.2	-59.9976							13.2	-66.3757						13.2	-57.5256
13.25	-59.845							13.25	-66.1316						13.25	-57.5867
13.3	-59.7229							13.3	-66.0705						13.3	-57.251
13.35	-59.8755							13.35	-66.4673						13.35	-57.6477
13.4	-60.0891							13.4	-66.2842						13.4	-57.5256
13.45	-60.1807							13.45	-65.9485						13.45	-57.4646
13.5	-60.0281							13.5	-66.1316						13.5	-57.373
13.55	-59.9976							13.55	-66.3757						13.55	-57.7087
13.6	-59.9365							13.6	-66.3147						13.6	-57.5867
13.65	-59.7839							13.65	-65.9485						13.65	-57.4036
13.7	-59.7839							13.7	-66.04						13.7	-57.4646
13.75	-59.845							13.75	-66.3757						13.75	-57.6477
13.8	-60.1807							13.8	-66.1926						13.8	-57.6477
13.85	-60.2417							13.85	-65.979						13.85	-57.4036
13.9	-60.1501							13.9	-66.04						13.9	-57.5561
13.95	-60.0586							13.95	-66.3757						13.95	-57.7087
14	-60.0891							14	-66.3452						14	-57.6782
14.05	-59.9976							14.05	-66.1621						14.05	-57.4036
14.1	-59.8144							14.1	-65.8569						14.1	-57.5256
14.15	-59.906							14.15	-66.2537						14.15	-57.8003
14.2	-60.0281							14.2	-66.3147						14.2	-57.7393
14.25	-60.2112							14.25	-66.2537						14.25	-57.4951
14.3	-60.1807							14.3	-65.918						14.3	-57.4341
14.35	-60.2417							14.35	-66.2537						14.35	-57.7698
14.4	-60.2417							14.4	-66.4368						14.4	-57.8308
14.45	-60.1807							14.45	-66.3147						14.45	-57.5867
14.5	-60.0281							14.5	-66.1011						14.5	-57.4951
14.55	-59.8755							14.55	-66.0705						14.55	-57.8308
14.6	-59.9365							14.6	-66.4368						14.6	-57.8613
14.65	-60.2417							14.65	-66.4368						14.65	-57.6477
14.7	-60.3332							14.7	-66.2231						14.7	-57.4951
14.75	-60.1807							14.75	-66.1621						14.75	-57.7393
14.8	-59.845							14.8	-66.2537						14.8	-57.7393
14.85	-59.8755							14.85	-66.3757						14.85	-57.7698
14.9	-60.3027							14.9	-66.3452						14.9	-57.5561
14.95	-60.1501							14.95	-66.2231						14.95	-57.5561
15	-59.9365							15	-65.979						15	-57.8003
15.05	-59.906							15.05	-66.1011						15.05	-57.7698
15.1	-60.3332							15.1	-66.4062						15.1	-57.6782
15.15	-60.2417							15.15	-66.3757						15.15	-57.4341
15.2	-59.7839							15.2	-66.2537						15.2	-57.6782
15.25	-60.3027							15.25	-65.918						15.25	-57.8308
15.3	-60.2722							15.3	-66.1621						15.3	-57.8003
15.35	-59.906							15.35	-66.4062						15.35	-57.5561
15.4	-60.1807							15.4	-66.3452						15.4	-57.4646
15.45	-60.2722							15.45	-66.3147						15.45	-57.7393
15.5	-59.845							15.5	-66.0095						15.5	-57.8003
15.55	-60.3332							15.55	-66.04						15.55	-57.8003
15.6	-60.0891							15.6	-66.3147						15.6	-57.7393
15.65	-59.9976							15.65	-66.3757						15.65	-57.5256
15.7	-60.3332							15.7	-66.2231						15.7	-57.6477
15.75	-59.9976							15.75	-66.0095						15.75	-57.8308
15.8	-60.0586							15.8	-65.8874						15.8	-57.7698
15.85	-60.1501							15.85	-66.1011						15.85	-57.6477
15.9	-59.7534							15.9	-66.2537						15.9	-57.373
15.95	-60.3027							15.95	-66.1926						15.95	-57.5561
16	-60.1807							16	-66.1621						16	-57.7087
16.05	-59.7534							16.05	-65.979						16.05	-57.7087
16.1	-60.1807							16.1	-65.8874						16.1	-57.6782
16.15	-60.1196							16.15	-66.1011						16.15	-57.5256
16.2	-59.906							16.2	-66.2537						16.2	-57.4341
16.25	-60.2417							16.25	-66.2231						16.25	-57.7698
16.3	-60.0891							16.3	-66.1926						16.3	-57.8308
16.35	-59.9365							16.35	-66.0095						16.35	-57.7698
16.4	-60.3027							16.4	-65.8264						16.4	-57.6477
16.45	-60.1196							16.45	-66.0705						16.45	-57.5256
16.5	-59.9365							16.5	-66.2842						16.5	-57.6782
16.55	-60.3943							16.55	-66.2842						16.55	-57.7698
16.6	-60.2112							16.6	-66.2231						16.6	-57.7393
16.65	-59.8755							16.65	-66.1011						16.65	-57.8613
16.7	-60.2722							16.7	-65.8264						16.7	-57.6172
16.75	-60.3332							16.75	-65.8569						16.75	-57.4951
16.8	-59.967							16.8	-66.1926						16.8	-57.5867
16.85	-60.0586							16.85	-66.3757						16.85	-57.8003
16.9	-60.2722							16.9	-66.1926						16.9	-57.8918
16.95	-60.1501							16.95	-66.2231						16.95	-57.7698
17	-59.845							17	-66.0705						17	-57.6172
17.05	-60.2112							17.05	-65.918						17.05	-57.4951
17.1	-60.1807							17.1	-65.918						17.1	-57.4341
17.15	-59.967							17.15	-66.0705						17.15	-57.6477
17.2	-59.9976							17.2	-66.2537						17.2	-57.7393
17.25	-60.2417							17.25	-66.2231						17.25	-57.6172
17.3	-60.1196							17.3	-66.1011						17.3	-57.8003
17.35	-59.845							17.35	-66.0705						17.35	-57.6782
17.4	-60.0891							17.4	-65.8874						17.4	-57.4646
17.45	-60.2112							17.45	-65.7654						17.45	-57.4341
17.5	-60.0281							17.5	-65.918						17.5	-57.7087
17.55	-59.906							17.55	-65.979						17.55	-57.8308
17.6	-60.1196							17.6	-66.1621						17.6	-57.7698
17.65	-60.1807							17.65	-66.1926						17.65	-57.7698
17.7	-59.9365							17.7	-66.0705						17.7	-57.7087
17.75	-59.8755							17.75	-66.04						17.75	-57.5867
17.8	-60.1807							17.8	-65.918						17.8	-57.4341
17.85	-60.0586							17.85	-65.7959						17.85	-57.5561
17.9	-60.0281							17.9	-65.7654						17.9	-57.7393
17.95	-59.845							17.95	-65.8264						17.95	-57.6172
18	-60.2722							18	-65.979						18	-57.7087
18.05	-60.1807							18.05	-66.1926						18.05	-57.4646
18.1	-59.8755							18.1	-66.1316						18.1	-57.373
18.15	-59.7534							18.15	-66.0705						18.15	-57.6477
18.2	-60.1807							18.2	-66.0705						18.2	-57.6477
18.25	-60.1196							18.25	-66.0705						18.25	-57.5561
18.3	-59.845							18.3	-65.8874						18.3	-57.3425
18.35	-59.6619							18.35	-65.7959						18.35	-57.7087
18.4	-60.0891							18.4	-65.7349						18.4	-57.6782
18.45	-60.0586							18.45	-65.8874						18.45	-57.6172
18.5	-59.967							18.5	-66.0705						18.5	-57.5256
18.55	-59.6924							18.55	-66.0705						18.55	-57.8003
18.6	-60.0281							18.6	-66.04						18.6	-57.6172
18.65	-60.1807							18.65	-65.9485						18.65	-57.5561
18.7	-60.0891							18.7	-65.7654						18.7	-57.7393
18.75	-59.7839							18.75	-66.0705						18.75	-57.5867
18.8	-59.906							18.8	-66.0705						18.8	-57.6477
18.85	-60.2417							18.85	-65.9485						18.85	-57.6782
18.9	-60.0586							18.9	-65.7349						18.9	-57.4036
18.95	-59.9365							18.95	-66.1621						18.95	-57.8003
19	-59.845							19	-65.979						19	-57.6172
19.05	-60.1501							19.05	-65.7349						19.05	-57.4951
19.1	-60.1501							19.1	-66.0095						19.1	-57.6782
19.15	-60.1196							19.15	-65.9485						19.15	-57.4646
19.2	-59.9365							19.2	-65.6738						19.2	-57.7087
19.25	-59.9365							19.25	-66.1316						19.25	-57.6782
19.3	-60.2112							19.3	-65.8569						19.3	-57.4646
19.35	-60.0891							19.35	-66.0095						19.35	-57.7087
19.4	-60.1196							19.4	-66.0705						19.4	-57.4951
19.45	-59.7839							19.45	-65.5823						19.45	-57.6172
19.5	-59.9365							19.5	-66.1621						19.5	-57.6477
19.55	-60.2112							19.55	-66.0705						19.55	-57.3425
19.6	-60.0891							19.6	-65.7349						19.6	-57.7087
19.65	-60.1501							19.65	-66.0705						19.65	-57.6172
19.7	-59.7839							19.7	-65.9485						19.7	-57.4036
19.75	-59.967							19.75	-65.979						19.75	-57.6782
19.8	-60.1501							19.8	-66.1011						19.8	-57.5867
19.85	-60.1807							19.85	-65.6738						19.85	-57.4951
19.9	-60.0586							19.9	-66.1316						19.9	-57.6172
19.95	-59.906							19.95	-66.1011						19.95	-57.4341
20	-59.906							20	-65.7043						20	-57.4646
20.05	-60.3027							20.05	-66.1316						20.05	-57.6172
20.1	-60.3332							20.1	-66.1011						20.1	-57.4951
20.15	-60.1807							20.15	-65.7959						20.15	-57.4036
20.2	-60.0281							20.2	-66.1011						20.2	-57.6477
20.25	-59.967							20.25	-66.1011						20.25	-57.5256
20.3	-60.1807							20.3	-65.7959						20.3	-57.373
20.35	-60.2722							20.35	-66.1926						20.35	-57.6477
20.4	-60.1807							20.4	-66.0705						20.4	-57.5561
20.45	-60.1807							20.45	-65.8264						20.45	-57.312
20.5	-60.0281							20.5	-66.0705						20.5	-57.6172
20.55	-59.967							20.55	-66.1621						20.55	-57.5867
20.6	-60.2112							20.6	-65.8874						20.6	-57.4036
20.65	-60.3638							20.65	-65.7349						20.65	-57.6782
20.7	-60.2112							20.7	-66.1621						20.7	-57.7087
20.75	-60.2112							20.75	-65.979						20.75	-57.4646
20.8	-59.967							20.8	-65.7349						20.8	-57.4646
20.85	-59.845							20.85	-66.04						20.85	-57.7087
20.9	-60.1807							20.9	-66.04						20.9	-57.5867
20.95	-60.3027							20.95	-65.8874						20.95	-57.251
21	-60.2112							21	-65.7959						21	-57.5867
21.05	-60.1807							21.05	-66.1316						21.05	-57.5561
21.1	-60.0891							21.1	-66.0705						21.1	-57.4341
21.15	-59.8144							21.15	-65.7043						21.15	-57.373
21.2	-60.1807							21.2	-65.9485						21.2	-57.5867
21.25	-60.3332							21.25	-66.1316						21.25	-57.5561
21.3	-60.4858							21.3	-65.8569						21.3	-57.1899
21.35	-60.3332							21.35	-65.7043						21.35	-57.4951
21.4	-60.1807							21.4	-66.0095						21.4	-57.5561
21.45	-60.1501							21.45	-65.979						21.45	-57.4036
21.5	-59.9976							21.5	-65.8264						21.5	-57.312
21.55	-60.2417							21.55	-65.7959						21.55	-57.5867
21.6	-60.3027							21.6	-66.04						21.6	-57.5561
21.65	-60.3332							21.65	-65.979						21.65	-57.373
21.7	-60.3638							21.7	-65.8874						21.7	-57.4951
21.75	-60.2722							21.75	-65.7959						21.75	-57.6477
21.8	-60.0891							21.8	-66.1316						21.8	-57.5256
21.85	-59.9365							21.85	-66.0095						21.85	-57.2815
21.9	-59.9365							21.9	-65.7959						21.9	-57.4341
21.95	-60.1807							21.95	-65.7959						21.95	-57.6172
22	-60.3027							22	-66.1621						22	-57.5256
22.05	-60.2722							22.05	-66.0705						22.05	-57.2205
22.1	-60.2112							22.1	-65.8874						22.1	-57.4036
22.15	-60.2417							22.15	-65.7654						22.15	-57.5256
22.2	-60.0891							22.2	-66.1621						22.2	-57.4951
22.25	-59.967							22.25	-66.04						22.25	-57.1899
22.3	-59.8755							22.3	-65.8874						22.3	-57.312
22.35	-60.1196							22.35	-65.6738						22.35	-57.4951
22.4	-60.2417							22.4	-66.1011						22.4	-57.4951
22.45	-60.3638							22.45	-66.0705						22.45	-57.2815
22.5	-60.2417							22.5	-65.979						22.5	-57.373
22.55	-60.2722							22.55	-65.7349						22.55	-57.6172
22.6	-60.2722							22.6	-65.9485						22.6	-57.5561
22.65	-60.0586							22.65	-66.1011						22.65	-57.2815
22.7	-59.9976							22.7	-66.0705						22.7	-57.373
22.75	-59.9365							22.75	-65.8264						22.75	-57.5561
22.8	-60.1501							22.8	-65.7349						22.8	-57.5256
22.85	-60.2112							22.85	-66.1316						22.85	-57.312
22.9	-60.3638							22.9	-66.0095						22.9	-57.1899
22.95	-60.3027							22.95	-65.918						22.95	-57.4951
23	-60.2417							23	-65.6433						23	-57.4646
23.05	-60.0281							23.05	-65.8569						23.05	-57.3425
23.1	-59.967							23.1	-66.1011						23.1	-57.1289
23.15	-60.3943							23.15	-65.979						23.15	-57.251
23.2	-60.3027							23.2	-65.918						23.2	-57.4951
23.25	-60.1501							23.25	-65.6738						23.25	-57.4036
23.3	-59.8144							23.3	-65.979						23.3	-57.1594
23.35	-60.1807							23.35	-66.1011						23.35	-56.9458
23.4	-60.1807							23.4	-66.1621						23.4	-57.312
23.45	-60.0586							23.45	-65.918						23.45	-57.4036
23.5	-59.906							23.5	-65.6738						23.5	-57.3425
23.55	-60.2722							23.55	-66.0095						23.55	-57.0679
23.6	-60.1807							23.6	-66.2231						23.6	-57.0984
23.65	-59.845							23.65	-66.1011						23.65	-57.3425
23.7	-60.2722							23.7	-65.918						23.7	-57.251
23.75	-60.0281							23.75	-65.7654						23.75	-57.312
23.8	-59.9976							23.8	-66.0095						23.8	-57.1899
23.85	-60.3027							23.85	-66.2231						23.85	-57.0679
23.9	-60.0281							23.9	-66.04						23.9	-57.2815
23.95	-60.0281							23.95	-66.0705						23.95	-57.312
24	-60.2722							24	-65.7959						24	-57.373
24.05	-59.906							24.05	-65.8569						24.05	-57.1594
24.1	-60.2112							24.1	-66.1316						24.1	-57.0373
24.15	-60.2417							24.15	-66.1316						24.15	-57.312
24.2	-59.845							24.2	-66.0705						24.2	-57.4341
24.25	-60.3332							24.25	-65.8874						24.25	-57.373
24.3	-60.0586							24.3	-65.6738						24.3	-57.2205
24.35	-59.906							24.35	-65.8569						24.35	-57.0373
24.4	-60.1807							24.4	-66.1316						24.4	-57.1899
24.45	-59.9976							24.45	-66.04						24.45	-57.373
24.5	-60.0281							24.5	-66.0095						24.5	-57.3425
24.55	-60.1807							24.55	-65.8264						24.55	-57.251
24.6	-59.906							24.6	-65.6738						24.6	-57.0373
24.65	-60.0281							24.65	-65.9485						24.65	-57.0679
24.7	-60.1196							24.7	-66.1621						24.7	-57.2205
24.75	-59.9365							24.75	-66.1011						24.75	-57.4036
24.8	-59.9365							24.8	-66.0095						24.8	-57.2815
24.85	-60.1501							24.85	-65.9485						24.85	-57.312
24.9	-60.0586							24.9	-65.6738						24.9	-57.1594
24.95	-59.7839							24.95	-65.8264						24.95	-57.0373
25	-60.1501							25	-65.918						25	-57.312
25.05	-60.1501							25.05	-66.2231						25.05	-57.4341
25.1	-59.845							25.1	-66.0095						25.1	-57.373
25.15	-60.0586							25.15	-65.9485						25.15	-57.2815
25.2	-60.1807							25.2	-65.8264						25.2	-57.1289
25.25	-59.8755							25.25	-65.7349						25.25	-57.0373
25.3	-60.0281							25.3	-65.918						25.3	-57.1899
25.35	-60.1807							25.35	-66.0705						25.35	-57.4036
25.4	-60.0891							25.4	-66.0705						25.4	-57.312
25.45	-59.7534							25.45	-66.0095						25.45	-57.2815
25.5	-60.1196							25.5	-66.04						25.5	-57.251
25.55	-60.1196							25.55	-65.7959						25.55	-57.1594
25.6	-59.845							25.6	-65.6128						25.6	-56.9763
25.65	-59.7839							25.65	-65.7349						25.65	-57.1899
25.7	-60.1501							25.7	-65.918						25.7	-57.373
25.75	-60.1196							25.75	-66.04						25.75	-57.3425
25.8	-59.7229							25.8	-65.979						25.8	-57.251
25.85	-59.906							25.85	-66.04						25.85	-57.312
25.9	-60.1807							25.9	-65.979						25.9	-57.2205
25.95	-59.9365							25.95	-65.7654						25.95	-57.1289
26	-59.6619							26	-65.6738						26	-56.9763
26.05	-59.906							26.05	-65.6738						26.05	-57.2815
26.1	-60.1501							26.1	-65.8569						26.1	-57.4036
26.15	-59.9976							26.15	-66.04						26.15	-57.3425
26.2	-59.6619							26.2	-66.0095						26.2	-57.2815
26.25	-59.9365							26.25	-65.9485						26.25	-57.2205
26.3	-60.1501							26.3	-65.979						26.3	-57.0373
26.35	-59.9976							26.35	-65.9485						26.35	-57.1594
26.4	-59.6924							26.4	-65.7043						26.4	-57.3425
26.45	-60.0281							26.45	-65.6128						26.45	-57.2815
26.5	-60.1501							26.5	-65.6128						26.5	-57.2205
26.55	-60.0281							26.55	-65.7959						26.55	-57.0373
26.6	-59.6619							26.6	-65.8874						26.6	-57.312
26.65	-59.8755							26.65	-65.979						26.65	-57.2815
26.7	-60.0891							26.7	-65.979						26.7	-57.1289
26.75	-59.9976							26.75	-65.918						26.75	-57.0984
26.8	-59.6924							26.8	-65.8874						26.8	-57.373
26.85	-59.7534							26.85	-65.7654						26.85	-57.2815
26.9	-60.0891							26.9	-65.6128						26.9	-56.9153
26.95	-59.967							26.95	-65.7654						26.95	-57.373
27	-59.845							27	-65.979						27	-57.2815
27.05	-59.6619							27.05	-65.918						27.05	-56.9763
27.1	-59.967							27.1	-65.8874						27.1	-57.3425
27.15	-60.0281							27.15	-65.7349						27.15	-57.1594
27.2	-59.9365							27.2	-66.0705						27.2	-57.2205
27.25	-59.6008							27.25	-66.0705						27.25	-57.2205
27.3	-59.7839							27.3	-65.7959						27.3	-56.7932
27.35	-60.1501							27.35	-65.979						27.35	-57.251
27.4	-60.0586							27.4	-65.979						27.4	-57.1289
27.45	-59.7839							27.45	-65.7349						27.45	-56.9458
27.5	-59.6619							27.5	-66.0705						27.5	-57.1594
27.55	-60.0586							27.55	-66.04						27.55	-56.8542
27.6	-60.1196							27.6	-65.6738						27.6	-57.1899
27.65	-59.906							27.65	-66.04						27.65	-57.0984
27.7	-59.7839							27.7	-66.0095						27.7	-56.8237
27.75	-59.7229							27.75	-65.8264						27.75	-57.0679
27.8	-60.0586							27.8	-66.04						27.8	-56.9458
27.85	-59.9976							27.85	-65.8264						27.85	-56.9763
27.9	-59.8755							27.9	-66.0095						27.9	-57.0984
27.95	-59.6924							27.95	-66.1011						27.95	-56.7932
28	-59.6619							28	-65.6128						28	-57.1899
28.05	-60.0281							28.05	-65.979						28.05	-57.1594
28.1	-59.906							28.1	-65.979						28.1	-56.7627
28.15	-59.9365							28.15	-65.6738						28.15	-57.1899
28.2	-59.6313							28.2	-66.0705						28.2	-57.1289
28.25	-59.5398							28.25	-65.7959						28.25	-56.7932
28.3	-59.845							28.3	-65.8874						28.3	-57.1289
28.35	-59.9365							28.35	-66.04						28.35	-56.9458
28.4	-59.8755							28.4	-65.8264						28.4	-56.7932
28.45	-59.6619							28.45	-65.8874						28.45	-57.0679
28.5	-59.5093							28.5	-66.0705						28.5	-56.9458
28.55	-59.7229							28.55	-65.8874						28.55	-56.6101
28.6	-59.9365							28.6	-65.7349						28.6	-56.9458
28.65	-59.906							28.65	-66.1621						28.65	-56.9458
28.7	-59.7534							28.7	-65.8874						28.7	-56.6101
28.75	-59.6313							28.75	-65.7043						28.75	-56.9458
28.8	-59.5703							28.8	-66.1011						28.8	-56.8542
28.85	-59.845							28.85	-66.0705						28.85	-56.7932
28.9	-59.8144							28.9	-65.7043						28.9	-56.8542
28.95	-59.8755							28.95	-66.0705						28.95	-56.9763
29	-59.6924							29	-66.1316						29	-56.8542
29.05	-59.4482							29.05	-65.9485						29.05	-56.7017
29.1	-59.4482							29.1	-65.7959						29.1	-56.9458
29.15	-59.6924							29.15	-66.1926						29.15	-56.9153
29.2	-59.9365							29.2	-66.0705						29.2	-56.5491
29.25	-59.6924							29.25	-65.7043						29.25	-56.9153
29.3	-59.7229							29.3	-65.979						29.3	-56.8848
29.35	-59.5093							29.35	-66.1316						29.35	-56.7017
29.4	-59.3567							29.4	-66.0095						29.4	-56.5796
29.45	-59.5398							29.45	-65.6128						29.45	-56.8848
29.5	-59.8144							29.5	-66.0095						29.5	-56.7932
29.55	-59.6924							29.55	-66.0705						29.55	-56.488
29.6	-59.6008							29.6	-65.8874						29.6	-56.7627
29.65	-59.6008							29.65	-65.7043						29.65	-56.7322
29.7	-59.4482							29.7	-66.04						29.7	-56.7322
29.75	-59.3872							29.75	-66.04						29.75	-56.5186
29.8	-59.6008							29.8	-65.6738						29.8	-56.8542
29.85	-59.8144							29.85	-65.8264						29.85	-56.7322
29.9	-59.8144							29.9	-65.9485						29.9	-56.6711
29.95	-59.6619							29.95	-66.0095						29.95	-56.7017
30	-59.6008							30	-65.6738						30	-56.9763
30.05	-59.5703							30.05	-65.918						30.05	-56.8542
30.1	-59.4788							30.1	-66.0095						30.1	-56.6406
30.15	-59.4788							30.15	-65.8874						30.15	-56.9153
30.2	-59.6924							30.2	-65.6128						30.2	-56.8542
30.25	-59.7839							30.25	-65.7959						30.25	-56.8237
30.3	-59.7839							30.3	-66.0095						30.3	-56.6101
30.35	-59.6924							30.35	-65.8874						30.35	-56.8848
30.4	-59.5093							30.4	-65.6128						30.4	-56.8542
30.45	-59.5398							30.45	-65.8569						30.45	-56.7627
30.5	-59.2651							30.5	-66.0705						30.5	-56.5796
30.55	-59.3872							30.55	-65.918						30.55	-56.7932
30.6	-59.5703							30.6	-65.8569						30.6	-56.8542
30.65	-59.6924							30.65	-65.7349						30.65	-56.7627
30.7	-59.7839							30.7	-66.0095						30.7	-56.427
30.75	-59.6313							30.75	-66.0095						30.75	-56.7627
30.8	-59.6313							30.8	-65.9485						30.8	-56.7627
30.85	-59.5703							30.85	-65.6433						30.85	-56.7322
30.9	-59.5703							30.9	-65.9485						30.9	-56.427
30.95	-59.4177							30.95	-66.0705						30.95	-56.7932
31	-59.4177							31	-66.04						31	-56.8542
31.05	-59.6313							31.05	-65.7654						31.05	-56.8542
31.1	-59.8144							31.1	-65.8264						31.1	-56.6101
31.15	-59.8144							31.15	-66.1621						31.15	-56.7627
31.2	-59.7534							31.2	-66.0705						31.2	-56.8848
31.25	-59.6924							31.25	-65.9485						31.25	-56.8542
31.3	-59.5703							31.3	-65.6128						31.3	-56.7322
31.35	-59.4788							31.35	-65.979						31.35	-56.5796
31.4	-59.6619							31.4	-66.1316						31.4	-56.8237
31.45	-59.7534							31.45	-66.04						31.45	-56.7932
31.5	-59.8144							31.5	-65.8874						31.5	-56.7932
31.55	-59.5093							31.55	-65.7043						31.55	-56.6101
31.6	-59.3872							31.6	-66.04						31.6	-56.6101
31.65	-59.6924							31.65	-66.1316						31.65	-56.9458
31.7	-59.6008							31.7	-66.1011						31.7	-56.8542
31.75	-59.3567							31.75	-65.8569						31.75	-56.6711
31.8	-59.5703							31.8	-65.7043						31.8	-56.5491
31.85	-59.6313							31.85	-65.918						31.85	-56.7627
31.9	-59.4482							31.9	-66.1316						31.9	-56.9458
31.95	-59.5093							31.95	-65.979						31.95	-56.7932
32	-59.6619							32	-65.8264						32	-56.8542
32.05	-59.4788							32.05	-65.7349						32.05	-56.5796
32.1	-59.4788							32.1	-65.9485						32.1	-56.8542
32.15	-59.845							32.15	-66.1316						32.15	-56.9153
32.2	-59.4177							32.2	-65.9485						32.2	-57.0068
32.25	-59.7229							32.25	-65.979						32.25	-56.8848
32.3	-59.6924							32.3	-65.7654						32.3	-56.5491
32.35	-59.3567							32.35	-65.7959						32.35	-56.9153
32.4	-59.8755							32.4	-66.0705						32.4	-57.0068
32.45	-59.7229							32.45	-66.2231						32.45	-56.9458
32.5	-59.4788							32.5	-66.1011						32.5	-56.8542
32.55	-59.8144							32.55	-65.8569						32.55	-56.5186
32.6	-59.6313							32.6	-65.6738						32.6	-56.7932
32.65	-59.7229							32.65	-65.979						32.65	-56.9153
32.7	-59.7534							32.7	-66.1926						32.7	-56.8848
32.75	-59.3262							32.75	-66.1011						32.75	-56.8237
32.8	-59.7534							32.8	-66.0705						32.8	-56.7322
32.85	-59.6924							32.85	-65.979						32.85	-56.5796
32.9	-59.2957							32.9	-65.7959						32.9	-56.7322
32.95	-59.7229							32.95	-65.8264						32.95	-56.8237
33	-59.6619							33	-66.1316						33	-56.7322
33.05	-59.2651							33.05	-66.1621						33.05	-56.8237
33.1	-59.6924							33.1	-66.1316						33.1	-56.5186
33.15	-59.6313							33.15	-65.9485						33.15	-56.5491
33.2	-59.3567							33.2	-65.8264						33.2	-56.7627
33.25	-59.6619							33.25	-65.7959						33.25	-56.9153
33.3	-59.6619							33.3	-65.979						33.3	-56.9153
33.35	-59.4177							33.35	-66.1011						33.35	-56.7932
33.4	-59.5398							33.4	-66.0705						33.4	-56.6711
33.45	-59.7839							33.45	-66.0705						33.45	-56.6101
33.5	-59.4788							33.5	-65.8569						33.5	-56.7932
33.55	-59.3567							33.55	-65.7959						33.55	-56.8848
33.6	-59.7534							33.6	-65.7654						33.6	-56.8542
33.65	-59.6619							33.65	-65.9485						33.65	-56.8542
33.7	-59.3262							33.7	-66.1011						33.7	-56.6711
33.75	-59.5398							33.75	-66.0705						33.75	-56.5491
33.8	-59.6619							33.8	-66.0705						33.8	-56.6406
33.85	-59.6008							33.85	-65.918						33.85	-56.8542
33.9	-59.2957							33.9	-65.8264						33.9	-56.8848
33.95	-59.6619							33.95	-65.7959						33.95	-56.8848
34	-59.6008							34	-65.8569						34	-56.7932
34.05	-59.4482							34.05	-65.979						34.05	-56.6406
34.1	-59.5093							34.1	-66.2537						34.1	-56.6101
34.15	-59.6313							34.15	-66.1011						34.15	-56.6406
34.2	-59.5703							34.2	-66.04						34.2	-56.8848
34.25	-59.2346							34.25	-66.0095						34.25	-56.8848
34.3	-59.5703							34.3	-65.918						34.3	-57.0068
34.35	-59.6619							34.35	-65.7654						34.35	-56.9458
34.4	-59.4788							34.4	-65.7959						34.4	-56.8542
34.45	-59.2651							34.45	-65.979						34.45	-56.7932
34.5	-59.5398							34.5	-66.2231						34.5	-56.6406
34.55	-59.6313							34.55	-66.2842						34.55	-56.8237
34.6	-59.3872							34.6	-66.1621						34.6	-57.0068
34.65	-59.2651							34.65	-66.1926						34.65	-56.8848
34.7	-59.6008							34.7	-66.1316						34.7	-56.8848
34.75	-59.6008							34.75	-66.04						34.75	-56.7627
34.8	-59.4482							34.8	-65.8874						34.8	-56.6406
34.85	-59.2346							34.85	-65.8569						34.85	-56.8542
34.9	-59.5703							34.9	-66.04						34.9	-56.8848
34.95	-59.5703							34.95	-66.2231						34.95	-56.7932
35	-59.4788							35	-66.2537						35	-56.6711
35.05	-59.1431							35.05	-66.3147						35.05	-57.0373
35.1	-59.5398							35.1	-66.1926						35.1	-56.9153
35.15	-59.5703							35.15	-66.1926						35.15	-56.6406
35.2	-59.4177							35.2	-65.979						35.2	-56.9458
35.25	-59.2346							35.25	-65.7959						35.25	-56.9153
35.3	-59.3872							35.3	-66.0705						35.3	-56.7322
35.35	-59.5093							35.35	-66.3147						35.35	-56.9763
35.4	-59.4482							35.4	-66.2537						35.4	-57.0068
35.45	-59.2041							35.45	-65.979						35.45	-56.6101
35.5	-59.1431							35.5	-65.8874						35.5	-57.0373
35.55	-59.5093							35.55	-66.2537						35.55	-57.0068
35.6	-59.4177							35.6	-66.2231						35.6	-56.8237
35.65	-59.2957							35.65	-65.8264						35.65	-56.9763
35.7	-59.1125							35.7	-66.1926						35.7	-56.7627
35.75	-59.3262							35.75	-66.1926						35.75	-56.9458
35.8	-59.5093							35.8	-65.8874						35.8	-56.9153
35.85	-59.4177							35.85	-66.3147						35.85	-56.6101
35.9	-59.3262							35.9	-66.1316						35.9	-56.9458
35.95	-59.1125							35.95	-65.9485						35.95	-56.7322
36	-59.4177							36	-66.2537						36	-56.8237
36.05	-59.3872							36.05	-66.1011						36.05	-56.9153
36.1	-59.3872							36.1	-66.1011						36.1	-56.6101
36.15	-59.1431							36.15	-66.3147						36.15	-56.8542
36.2	-59.1736							36.2	-65.8264						36.2	-56.8848
36.25	-59.5093							36.25	-66.3147						36.25	-56.6406
36.3	-59.5398							36.3	-66.1621						36.3	-56.9153
36.35	-59.3872							36.35	-66.0095						36.35	-56.7627
36.4	-59.1431							36.4	-66.3452						36.4	-56.7627
36.45	-59.1736							36.45	-66.0705						36.45	-56.9458
36.5	-59.4788							36.5	-66.1011						36.5	-56.7017
36.55	-59.3872							36.55	-66.3147						36.55	-56.7322
36.6	-59.3872							36.6	-66.04						36.6	-56.8848
36.65	-59.1431							36.65	-66.2537						36.65	-56.7627
36.7	-59.0515							36.7	-66.3147						36.7	-56.7322
36.75	-59.3262							36.75	-65.9485						36.75	-56.8848
36.8	-59.3872							36.8	-66.2842						36.8	-56.7627
36.85	-59.2651							36.85	-66.3452						36.85	-56.6711
36.9	-59.082							36.9	-65.979						36.9	-56.9763
36.95	-58.9905							36.95	-66.1926						36.95	-56.8237
37	-59.2041							37	-66.3452						37	-56.5491
37.05	-59.4177							37.05	-66.1316						37.05	-57.0373
37.1	-59.3567							37.1	-66.0705						37.1	-56.8848
37.15	-59.4482							37.15	-66.3757						37.15	-56.5186
37.2	-59.2041							37.2	-66.2231						37.2	-56.8848
37.25	-59.0515							37.25	-65.979						37.25	-56.9458
37.3	-59.3872							37.3	-66.3147						37.3	-56.7322
37.35	-59.6008							37.35	-66.3147						37.35	-56.7627
37.4	-59.4177							37.4	-66.04						37.4	-56.8848
37.45	-59.2651							37.45	-66.1621						37.45	-56.9153
37.5	-59.1736							37.5	-66.3757						37.5	-56.6711
37.55	-59.1431							37.55	-66.1621						37.55	-56.8542
37.6	-59.3872							37.6	-65.918						37.6	-56.8542
37.65	-59.5093							37.65	-66.2537						37.65	-56.7017
37.7	-59.3872							37.7	-66.3147						37.7	-56.7627
37.75	-59.4482							37.75	-66.0095						37.75	-56.9458
37.8	-59.2041							37.8	-66.04						37.8	-56.8237
37.85	-59.0515							37.85	-66.3757						37.85	-56.5491
37.9	-59.2041							37.9	-66.3147						37.9	-56.9153
37.95	-59.3872							37.95	-65.979						37.95	-56.8542
38	-59.4482							38	-66.2537						38	-56.7017
38.05	-59.4482							38.05	-66.3452						38.05	-56.6406
38.1	-59.3262							38.1	-66.3452						38.1	-56.9458
38.15	-59.1736							38.15	-65.8569						38.15	-56.8848
38.2	-59.1431							38.2	-66.3452						38.2	-56.6101
38.25	-59.2957							38.25	-66.4062						38.25	-56.7627
38.3	-59.5703							38.3	-66.1926						38.3	-57.0679
38.35	-59.4788							38.35	-65.9485						38.35	-56.9458
38.4	-59.5398							38.4	-66.3757						38.4	-56.6711
38.45	-59.4177							38.45	-66.4673						38.45	-57.0068
38.5	-59.2957							38.5	-66.3147						38.5	-57.0984
38.55	-59.1736							38.55	-65.8874						38.55	-57.0679
38.6	-59.3262							38.6	-66.2842						38.6	-56.6406
38.65	-59.6008							38.65	-66.4368						38.65	-57.1289
38.7	-59.5093							38.7	-66.2842						38.7	-57.1594
38.75	-59.5398							38.75	-65.9485						38.75	-57.0984
38.8	-59.5398							38.8	-66.2537						38.8	-56.7627
38.85	-59.4482							38.85	-66.3757						38.85	-57.0373
38.9	-59.2346							38.9	-66.3757						38.9	-57.0679
38.95	-59.082							38.95	-65.979						38.95	-57.0068
39	-59.1736							39	-66.1011						39	-56.7932
39.05	-59.4177							39.05	-66.4368						39.05	-57.0373
39.1	-59.4788							39.1	-66.4062						39.1	-57.1289
39.15	-59.4482							39.15	-66.1316						39.15	-57.1289
39.2	-59.3872							39.2	-65.979						39.2	-56.9458
39.25	-59.4482							39.25	-66.4062						39.25	-56.9458
39.3	-59.2957							39.3	-66.3757						39.3	-57.1899
39.35	-59.2346							39.35	-66.2537						39.35	-57.251
39.4	-58.9905							39.4	-65.918						39.4	-57.0373
39.45	-59.2651							39.45	-66.2842						39.45	-56.8542
39.5	-59.3872							39.5	-66.4368						39.5	-57.2205
39.55	-59.4788							39.55	-66.4062						39.55	-57.2205
39.6	-59.5093							39.6	-66.1316						39.6	-57.2205
39.65	-59.5398							39.65	-66.1316						39.65	-56.9458
39.7	-59.3872							39.7	-66.3452						39.7	-57.0373
39.75	-59.0515							39.75	-66.4368						39.75	-57.2815
39.8	-59.4482							39.8	-66.4368						39.8	-57.1899
39.85	-59.6313							39.85	-66.3452						39.85	-56.9763
39.9	-59.5703							39.9	-66.0705						39.9	-56.8848
39.95	-59.2041							39.95	-66.4978						39.95	-57.1899
40	-59.3567							40	-66.4978						40	-57.1594
40.05	-59.5703							40.05	-66.4978						40.05	-57.1289
40.1	-59.4482							40.1	-66.2231						40.1	-56.7627
40.15	-59.021							40.15	-66.1926						40.15	-56.8542
40.2	-59.4788							40.2	-66.4978						40.2	-57.1594
40.25	-59.4482							40.25	-66.6199						40.25	-57.1289
40.3	-59.082							40.3	-66.4368						40.3	-57.0373
40.35	-59.4177							40.35	-66.2537						40.35	-56.8542
40.4	-59.4177							40.4	-66.1621						40.4	-56.9763
40.45	-59.021							40.45	-66.4368						40.45	-57.1594
40.5	-59.5398							40.5	-66.6199						40.5	-57.1289
40.55	-59.3567							40.55	-66.4978						40.55	-57.0984
40.6	-59.1736							40.6	-66.3147						40.6	-56.8848
40.65	-59.5093							40.65	-66.1926						40.65	-56.9458
40.7	-59.3262							40.7	-66.3147						40.7	-57.1594
40.75	-59.3567							40.75	-66.4978						40.75	-57.0679
40.8	-59.3872							40.8	-66.4673						40.8	-57.1594
40.85	-59.1125							40.85	-66.4978						40.85	-57.0068
40.9	-59.5703							40.9	-66.2537						40.9	-56.8237
40.95	-59.4788							40.95	-66.1621						40.95	-57.0068
41	-59.1431							41	-66.3147						41	-57.2205
41.05	-59.4788							41.05	-66.5588						41.05	-57.1289
41.1	-59.3872							41.1	-66.4978						41.1	-57.1594
41.15	-59.2651							41.15	-66.5283						41.15	-56.8542
41.2	-59.4788							41.2	-66.2842						41.2	-56.8848
41.25	-59.2957							41.25	-66.1316						41.25	-57.0984
41.3	-59.3262							41.3	-66.2537						41.3	-57.1899
41.35	-59.5093							41.35	-66.5283						41.35	-57.251
41.4	-59.3262							41.4	-66.4673						41.4	-57.0679
41.45	-59.2041							41.45	-66.4368						41.45	-57.0068
41.5	-59.4788							41.5	-66.3757						41.5	-57.0068
41.55	-59.3567							41.55	-66.2537						41.55	-57.1899
41.6	-59.2346							41.6	-66.3147						41.6	-57.2815
41.65	-59.5093							41.65	-66.4062						41.65	-57.1899
41.7	-59.4177							41.7	-66.5283						41.7	-57.2205
41.75	-59.0515							41.75	-66.4978						41.75	-57.0068
41.8	-59.5398							41.8	-66.4978						41.8	-56.8542
41.85	-59.5398							41.85	-66.2842						41.85	-57.1594
41.9	-59.2041							41.9	-66.2231						41.9	-57.312
41.95	-59.3567							41.95	-66.3452						41.95	-57.251
42	-59.5398							42	-66.4978						42	-57.2205
42.05	-59.3872							42.05	-66.6504						42.05	-57.1594
42.1	-59.1431							42.1	-66.5588						42.1	-56.9458
42.15	-59.6619							42.15	-66.5588						42.15	-56.9763
42.2	-59.6313							42.2	-66.3757						42.2	-57.0679
42.25	-59.2957							42.25	-66.2537						42.25	-57.251
42.3	-59.3262							42.3	-66.2231						42.3	-57.251
42.35	-59.6313							42.35	-66.4062						42.35	-57.251
42.4	-59.5703							42.4	-66.4673						42.4	-57.2205
42.45	-59.2041							42.45	-66.5893						42.45	-57.0373
42.5	-59.4482							42.5	-66.4673						42.5	-57.0068
42.55	-59.5703							42.55	-66.4673						42.55	-57.0373
42.6	-59.4788							42.6	-66.4062						42.6	-57.251
42.65	-59.2041							42.65	-66.2537						42.65	-57.312
42.7	-59.5398							42.7	-66.1316						42.7	-57.3425
42.75	-59.5398							42.75	-66.1926						42.75	-57.2815
42.8	-59.3872							42.8	-66.3452						42.8	-57.0984
42.85	-59.1736							42.85	-66.4368						42.85	-57.0373
42.9	-59.5703							42.9	-66.4368						42.9	-57.0679
42.95	-59.4788							42.95	-66.4062						42.95	-57.1899
43	-59.3872							43	-66.4062						43	-57.312
43.05	-59.2957							43.05	-66.3147						43.05	-57.2205
43.1	-59.6313							43.1	-66.1316						43.1	-57.1289
43.15	-59.4788							43.15	-66.1316						43.15	-56.9763
43.2	-59.4177							43.2	-66.04						43.2	-57.251
43.25	-59.2957							43.25	-66.1011						43.25	-57.1899
43.3	-59.6313							43.3	-66.2231						43.3	-57.1594
43.35	-59.6008							43.35	-66.4978						43.35	-56.9763
43.4	-59.5398							43.4	-66.3757						43.4	-57.2815
43.45	-59.3262							43.45	-66.3452						43.45	-57.251
43.5	-59.5398							43.5	-66.2842						43.5	-56.9763
43.55	-59.6313							43.55	-66.1621						43.55	-57.312
43.6	-59.5093							43.6	-66.0095						43.6	-57.312
43.65	-59.2651							43.65	-66.3147						43.65	-56.9763
43.7	-59.5398							43.7	-66.3757						43.7	-57.373
43.75	-59.6008							43.75	-66.3452						43.75	-57.312
43.8	-59.5703							43.8	-66.0705						43.8	-57.0984
43.85	-59.2957							43.85	-66.1621						43.85	-57.373
43.9	-59.3872							43.9	-66.4062						43.9	-57.2205
43.95	-59.6619							43.95	-66.2842						43.95	-57.2205
44	-59.5703							44	-66.1316						44	-57.4036
44.05	-59.3872							44.05	-66.4062						44.05	-57.0984
44.1	-59.2651							44.1	-66.2537						44.1	-57.4341
44.15	-59.5398							44.15	-66.1011						44.15	-57.3425
44.2	-59.5703							44.2	-66.4368						44.2	-57.0068
44.25	-59.6008							44.25	-66.1316						44.25	-57.373
44.3	-59.2346							44.3	-66.2537						44.3	-57.1594
44.35	-59.3872							44.35	-66.3452						44.35	-57.251
44.4	-59.6924							44.4	-65.8874						44.4	-57.373
44.45	-59.6008							44.45	-66.3757						44.45	-57.0679
44.5	-59.5703							44.5	-66.2537						44.5	-57.4036
44.55	-59.2346							44.55	-65.979						44.55	-57.251
44.6	-59.3872							44.6	-66.3452						44.6	-57.251
44.65	-59.7839							44.65	-66.1926						44.65	-57.4951
44.7	-59.7229							44.7	-66.1926						44.7	-57.2205
44.75	-59.5093							44.75	-66.3452						44.75	-57.2815
44.8	-59.2957							44.8	-65.9485						44.8	-57.4341
44.85	-59.3567							44.85	-66.3452						44.85	-57.312
44.9	-59.6619							44.9	-66.3452						44.9	-57.3425
44.95	-59.5703							44.95	-65.8874						44.95	-57.4036
45	-59.4788							45	-66.3757						45	-57.2815
45.05	-59.2957							45.05	-66.3147						45.05	-57.251
45.1	-59.2651							45.1	-65.918						45.1	-57.373
45.15	-59.6313							45.15	-66.3147						45.15	-57.1899
45.2	-59.6313							45.2	-66.3757						45.2	-57.1289
45.25	-59.5093							45.25	-65.8874						45.25	-57.3425
45.3	-59.3872							45.3	-66.3452						45.3	-57.251
45.35	-59.2041							45.35	-66.3147						45.35	-57.0679
45.4	-59.4788							45.4	-66.04						45.4	-57.3425
45.45	-59.5703							45.45	-66.2537						45.45	-57.3425
45.5	-59.6008							45.5	-66.3147						45.5	-57.0373
45.55	-59.4482							45.55	-66.1621						45.55	-57.3425
45.6	-59.1431							45.6	-66.1011						45.6	-57.2205
45.65	-59.1736							45.65	-66.4368						45.65	-57.2205
45.7	-59.5703							45.7	-66.2537						45.7	-57.1899
45.75	-59.5703							45.75	-65.9485						45.75	-57.3425
45.8	-59.5398							45.8	-66.2842						45.8	-57.2815
45.85	-59.4788							45.85	-66.3452						45.85	-57.0373
45.9	-59.2651							45.9	-66.1011						45.9	-57.4036
45.95	-59.2957							45.95	-66.04						45.95	-57.3425
46	-59.4788							46	-66.4368						46	-57.1594
46.05	-59.7229							46.05	-66.3452						46.05	-57.2205
46.1	-59.5703							46.1	-65.979						46.1	-57.4341
46.15	-59.5398							46.15	-66.1926						46.15	-57.373
46.2	-59.3872							46.2	-66.2842						46.2	-56.9458
46.25	-59.1736							46.25	-66.1621						46.25	-57.373
46.3	-59.3567							46.3	-65.8569						46.3	-57.251
46.35	-59.5703							46.35	-66.2537						46.35	-57.2205
46.4	-59.5703							46.4	-66.3147						46.4	-57.0373
46.45	-59.5703							46.45	-66.0705						46.45	-57.312
46.5	-59.4482							46.5	-65.8569						46.5	-57.373
46.55	-59.2957							46.55	-66.2537						46.55	-57.0679
46.6	-59.1736							46.6	-66.1316						46.6	-57.1899
46.65	-59.3262							46.65	-66.0705						46.65	-57.3425
46.7	-59.6008							46.7	-65.7959						46.7	-57.3425
46.75	-59.6924							46.75	-66.2231						46.75	-57.0068
46.8	-59.5093							46.8	-66.1316						46.8	-57.2205
46.85	-59.4788							46.85	-66.0705						46.85	-57.2815
46.9	-59.3872							46.9	-65.8264						46.9	-57.2815
46.95	-59.2651							46.95	-66.2231						46.95	-56.9458
47	-59.3262							47	-66.1316						47	-57.0984
47.05	-59.5398							47.05	-66.1316						47.05	-57.312
47.1	-59.6619							47.1	-65.7959						47.1	-57.251
47.15	-59.7229							47.15	-66.0705						47.15	-56.9458
47.2	-59.6924							47.2	-66.1621						47.2	-57.0984
47.25	-59.5398							47.25	-66.1011						47.25	-57.2815
47.3	-59.4482							47.3	-65.8569						47.3	-57.1899
47.35	-59.3567							47.35	-66.0095						47.35	-56.8542
47.4	-59.3262							47.4	-66.2231						47.4	-57.1594
47.45	-59.4788							47.45	-66.1926						47.45	-57.251
47.5	-59.5703							47.5	-65.9485						47.5	-57.1289
47.55	-59.6924							47.55	-65.8874						47.55	-56.9763
47.6	-59.6313							47.6	-66.1926						47.6	-56.9763
47.65	-59.7229							47.65	-66.1621						47.65	-57.312
47.7	-59.5093							47.7	-66.04						47.7	-57.2205
47.75	-59.4177							47.75	-65.8264						47.75	-57.1289
47.8	-59.2957							47.8	-66.0705						47.8	-56.9153
47.85	-59.3567							47.85	-66.1011						47.85	-57.1594
47.9	-59.5093							47.9	-66.1621						47.9	-57.251
47.95	-59.7229							47.95	-65.8874						47.95	-57.251
48	-59.6619							48	-65.8264						48	-57.0679
48.05	-59.6008							48.05	-66.1926						48.05	-57.0984
48.1	-59.3262							48.1	-66.1011						48.1	-57.3425
48.15	-59.3567							48.15	-66.0705						48.15	-57.312
48.2	-59.7534							48.2	-65.7043						48.2	-57.0984
48.25	-59.7534							48.25	-65.7959						48.25	-56.9458
48.3	-59.5093							48.3	-66.1316						48.3	-57.1899
48.35	-59.3567							48.35	-66.1316						48.35	-57.2205
48.4	-59.7534							48.4	-65.979						48.4	-57.2205
48.45	-59.6924							48.45	-65.7349						48.45	-57.0984
48.5	-59.2651							48.5	-65.8874						48.5	-56.9458
48.55	-59.7534							48.55	-66.1316						48.55	-57.2205
48.6	-59.7534							48.6	-66.0705						48.6	-57.1899
48.65	-59.3262							48.65	-65.9485						48.65	-57.251
48.7	-59.7534							48.7	-65.7959						48.7	-56.9153
48.75	-59.6924							48.75	-65.6738						48.75	-56.8542
48.8	-59.2346							48.8	-66.0095						48.8	-57.2205
48.85	-59.6619							48.85	-66.0095						48.85	-57.312
48.9	-59.5703							48.9	-66.0705						48.9	-57.2205
48.95	-59.2651							48.95	-65.8264						48.95	-57.0984
49	-59.6313							49	-65.6128						49	-56.9153
49.05	-59.3567							49.05	-65.8264						49.05	-57.312
49.1	-59.5703							49.1	-66.0705						49.1	-57.2815
49.15	-59.6008							49.15	-66.04						49.15	-57.251
49.2	-59.2041							49.2	-65.918						49.2	-57.1594
49.25	-59.7534							49.25	-65.7349						49.25	-57.0679
49.3	-59.5093							49.3	-65.6433						49.3	-57.0373
49.35	-59.3262							49.35	-65.8874						49.35	-57.2815
49.4	-59.7229							49.4	-66.0095						49.4	-57.312
49.45	-59.5093							49.45	-65.9485						49.45	-57.1594
49.5	-59.5093							49.5	-66.0095						49.5	-57.0984
49.55	-59.5703							49.55	-65.7959						49.55	-56.9458
49.6	-59.2957							49.6	-65.5518						49.6	-57.0068
49.65	-59.6313							49.65	-65.8264						49.65	-57.2205
49.7	-59.6924							49.7	-65.979						49.7	-57.1899
49.75	-59.2346							49.75	-65.979						49.75	-57.1289
49.8	-59.5398							49.8	-65.9485						49.8	-57.0068
49.85	-59.6924							49.85	-65.7654						49.85	-56.9458
49.9	-59.2651							49.9	-65.5518						49.9	-57.0984
49.95	-59.4788							49.95	-65.6738						49.95	-57.1899
50	-59.5398							50	-65.918						50	-57.251
50.05	-59.3872							50.05	-66.0095						50.05	-57.2205
50.1	-59.4177							50.1	-65.8264						50.1	-57.0984
50.15	-59.6924							50.15	-65.8569						50.15	-56.8542
50.2	-59.3567							50.2	-65.7349						50.2	-56.9458
50.25	-59.1431							50.25	-65.4602						50.25	-57.2205
50.3	-59.6008							50.3	-65.5823						50.3	-57.2205
50.35	-59.5398							50.35	-65.918						50.35	-57.0679
50.4	-59.1736							50.4	-65.9485						50.4	-57.0679
50.45	-59.3567							50.45	-65.8874						50.45	-56.9763
50.5	-59.5703							50.5	-65.8264						50.5	-56.7932
50.55	-59.3262							50.55	-65.7654						50.55	-56.9153
50.6	-59.1736							50.6	-65.6128						50.6	-57.0068
50.65	-59.5398							50.65	-65.4907						50.65	-57.0679
50.7	-59.4788							50.7	-65.6433						50.7	-57.0984
50.75	-59.2651							50.75	-65.8874						50.75	-57.0984
50.8	-59.4482							50.8	-65.979						50.8	-56.9458
50.85	-59.5703							50.85	-65.7959						50.85	-56.7932
50.9	-59.4788							50.9	-65.8264						50.9	-56.9153
50.95	-59.2651							50.95	-65.7654						50.95	-57.0068
51	-59.5703							51	-65.7654						51	-57.1594
51.05	-59.5093							51.05	-65.4907						51.05	-57.1594
51.1	-59.3262							51.1	-65.5212						51.1	-57.1594
51.15	-59.2651							51.15	-65.7349						51.15	-57.1899
51.2	-59.5703							51.2	-65.918						51.2	-56.9153
51.25	-59.5093							51.25	-65.7959						51.25	-56.8237
51.3	-59.1431							51.3	-65.7654						51.3	-57.0373
51.35	-59.2957							51.35	-65.8264						51.35	-57.2205
51.4	-59.6313							51.4	-65.7349						51.4	-57.0679
51.45	-59.3872							51.45	-65.5518						51.45	-57.0679
51.5	-59.082							51.5	-65.4602						51.5	-56.8237
51.55	-59.4177							51.55	-65.4907						51.55	-57.0984
51.6	-59.5703							51.6	-65.4907						51.6	-57.1899
51.65	-59.4177							51.65	-65.6433						51.65	-57.0373
51.7	-59.0515							51.7	-65.7349						51.7	-56.8237
51.75	-59.4482							51.75	-65.7349						51.75	-57.251
51.8	-59.6313							51.8	-65.7043						51.8	-57.1899
51.85	-59.5703							51.85	-65.6738						51.85	-56.8542
51.9	-59.2957							51.9	-65.4602						51.9	-57.0984
51.95	-59.3872							51.95	-65.3381						51.95	-57.1899
52	-59.6619							52	-65.7349						52	-56.9153
52.05	-59.5093							52.05	-65.7349						52.05	-57.2815
52.1	-59.3567							52.1	-65.6433						52.1	-57.2205
52.15	-59.3262							52.15	-65.2771						52.15	-56.8848
52.2	-59.6619							52.2	-65.7959						52.2	-57.373
52.25	-59.5093							52.25	-65.7349						52.25	-57.0984
52.3	-59.4177							52.3	-65.4907						52.3	-57.0679
52.35	-59.2651							52.35	-65.4907						52.35	-57.1899
52.4	-59.5703							52.4	-65.7349						52.4	-57.0679
52.45	-59.6313							52.45	-65.5823						52.45	-57.1594
52.5	-59.4482							52.5	-65.6433						52.5	-57.0984
52.55	-59.1431							52.55	-65.7959						52.55	-56.8542
52.6	-59.3262							52.6	-65.4907						52.6	-57.2205
52.65	-59.6924							52.65	-65.918						52.65	-57.0373
52.7	-59.5398							52.7	-65.7043						52.7	-57.0373
52.75	-59.3567							52.75	-65.3992						52.75	-57.0984
52.8	-59.2346							52.8	-65.918						52.8	-56.8237
52.85	-59.5093							52.85	-65.6433						52.85	-57.1289
52.9	-59.5703							52.9	-65.6738						52.9	-57.2205
52.95	-59.4788							52.95	-65.8874						52.95	-56.8542
53	-59.3262							53	-65.4602						53	-57.2205
53.05	-59.3262							53.05	-65.918						53.05	-57.0679
53.1	-59.5703							53.1	-65.7959						53.1	-56.8237
53.15	-59.6008							53.15	-65.3992						53.15	-57.1594
53.2	-59.5398							53.2	-65.8264						53.2	-57.0373
53.25	-59.3872							53.25	-65.7654						53.25	-56.8848
53.3	-59.3567							53.3	-65.5518						53.3	-57.1899
53.35	-59.6619							53.35	-65.7654						53.35	-57.0679
53.4	-59.7534							53.4	-65.6433						53.4	-56.9153
53.45	-59.6619							53.45	-65.5518						53.45	-57.2205
53.5	-59.3872							53.5	-65.8569						53.5	-57.1594
53.55	-59.3262							53.55	-65.5823						53.55	-56.7932
53.6	-59.6924							53.6	-65.5212						53.6	-57.2205
53.65	-59.7229							53.65	-65.7654						53.65	-57.1289
53.7	-59.6313							53.7	-65.7043						53.7	-56.9153
53.75	-59.4482							53.75	-65.3686						53.75	-57.0373
53.8	-59.1431							53.8	-65.7349						53.8	-57.1594
53.85	-59.5093							53.85	-65.7043						53.85	-57.0068
53.9	-59.7229							53.9	-65.4297						53.9	-56.9763
53.95	-59.6313							53.95	-65.6738						53.95	-57.1899
54	-59.4482							54	-65.7654						54	-57.1289
54.05	-59.3872							54.05	-65.6128						54.05	-56.8542
54.1	-59.3567							54.1	-65.5212						54.1	-57.1899
54.15	-59.6008							54.15	-65.8874						54.15	-57.0984
54.2	-59.6924							54.2	-65.7043						54.2	-56.9763
54.25	-59.7534							54.25	-65.3992						54.25	-57.0679
54.3	-59.6008							54.3	-65.7043						54.3	-57.312
54.35	-59.2957							54.35	-65.7654						54.35	-57.1594
54.4	-59.4177							54.4	-65.6433						54.4	-56.8848
54.45	-59.6924							54.45	-65.4907						54.45	-57.251
54.5	-59.7534							54.5	-65.8569						54.5	-57.2205
54.55	-59.6313							54.55	-65.7654						54.55	-57.1289
54.6	-59.5093							54.6	-65.5518						54.6	-56.8848
54.65	-59.4788							54.65	-65.5823						54.65	-57.2205
54.7	-59.3872							54.7	-65.918						54.7	-57.2205
54.75	-59.6008							54.75	-65.7349						54.75	-57.1289
54.8	-59.6619							54.8	-65.5212						54.8	-57.0068
54.85	-59.6924							54.85	-65.6433						54.85	-57.2205
54.9	-59.6619							54.9	-65.8874						54.9	-57.2815
54.95	-59.6008							54.95	-65.6433						54.95	-56.9458
55	-59.3262							55	-65.3686						55	-57.1594
55.05	-59.2957							55.05	-65.7654						55.05	-57.312
55.1	-59.6619							55.1	-65.8569						55.1	-57.312
55.15	-59.7534							55.15	-65.7349						55.15	-57.0373
55.2	-59.7229							55.2	-65.3992						55.2	-57.251
55.25	-59.5703							55.25	-65.7043						55.25	-57.3425
55.3	-59.6924							55.3	-65.8874						55.3	-57.312
55.35	-59.3567							55.35	-65.7349						55.35	-57.1594
55.4	-59.3872							55.4	-65.4907						55.4	-57.2205
55.45	-59.6008							55.45	-65.6738						55.45	-57.4341
55.5	-59.845							55.5	-65.8569						55.5	-57.4036
55.55	-59.7839							55.55	-65.8569						55.55	-57.2205
55.6	-59.6924							55.6	-65.4602						55.6	-57.312
55.65	-59.6924							55.65	-65.4602						55.65	-57.4646
55.7	-59.5703							55.7	-65.918						55.7	-57.4036
55.75	-59.5398							55.75	-65.8264						55.75	-57.312
55.8	-59.3872							55.8	-65.6433						55.8	-57.3425
55.85	-59.5398							55.85	-65.4297						55.85	-57.4951
55.9	-59.7534							55.9	-65.8874						55.9	-57.4341
55.95	-59.8144							55.95	-65.8569						55.95	-57.373
56	-59.7229							56	-65.7349						56	-57.1594
56.05	-59.6619							56.05	-65.4907						56.05	-57.4951
56.1	-59.5703							56.1	-65.8264						56.1	-57.5256
56.15	-59.4788							56.15	-65.979						56.15	-57.5256
56.2	-59.3262							56.2	-65.8874						56.2	-57.312
56.25	-59.4482							56.25	-65.6128						56.25	-57.4036
56.3	-59.6619							56.3	-65.6128						56.3	-57.6477
56.35	-59.6619							56.35	-65.8874						56.35	-57.5867
56.4	-59.6313							56.4	-65.918						56.4	-57.4951
56.45	-59.3567							56.45	-65.7959						56.45	-57.2815
56.5	-59.3872							56.5	-65.4907						56.5	-57.4951
56.55	-59.845							56.55	-65.6738						56.55	-57.5561
56.6	-59.6619							56.6	-65.918						56.6	-57.5256
56.65	-59.4482							56.65	-65.8264						56.65	-57.4036
56.7	-59.4788							56.7	-65.8264						56.7	-57.2205
56.75	-59.906							56.75	-65.5518						56.75	-57.5256
56.8	-59.7229							56.8	-65.5518						56.8	-57.5561
56.85	-59.2651							56.85	-65.918						56.85	-57.5561
56.9	-59.7534							56.9	-65.8569						56.9	-57.4036
56.95	-59.7229							56.95	-65.7959						56.95	-57.251
57	-59.4177							57	-65.5212						57	-57.6782
57.05	-59.7839							57.05	-65.5823						57.05	-57.5561
57.1	-59.6619							57.1	-65.8569						57.1	-57.5867
57.15	-59.3262							57.15	-65.918						57.15	-57.373
57.2	-59.7839							57.2	-65.9485						57.2	-57.312
57.25	-59.5703							57.25	-65.6128						57.25	-57.4951
57.3	-59.4177							57.3	-65.4907						57.3	-57.6477
57.35	-59.6924							57.35	-65.7349						57.35	-57.5561
57.4	-59.2957							57.4	-66.0095						57.4	-57.5256
57.45	-59.6924							57.45	-65.9485						57.45	-57.373
57.5	-59.7229							57.5	-65.7959						57.5	-57.4036
57.55	-59.2651							57.55	-65.6433						57.55	-57.6477
57.6	-59.8755							57.6	-65.6128						57.6	-57.5561
57.65	-59.5093							57.65	-65.9485						57.65	-57.5561
57.7	-59.5093							57.7	-65.918						57.7	-57.373
57.75	-59.6619							57.75	-65.9485						57.75	-57.1594
57.8	-59.4482							57.8	-65.8264						57.8	-57.4341
57.85	-59.7229							57.85	-65.6433						57.85	-57.4951
57.9	-59.6924							57.9	-65.7043						57.9	-57.4646
57.95	-59.4482							57.95	-66.0705						57.95	-57.4036
58	-59.7534							58	-66.0705						58	-57.2205
58.05	-59.7839							58.05	-66.0705						58.05	-57.0984
58.1	-59.2651							58.1	-65.9485						58.1	-57.312
58.15	-59.6924							58.15	-65.918						58.15	-57.4341
58.2	-59.7534							58.2	-65.7959						58.2	-57.4646
58.25	-59.3262							58.25	-65.9485						58.25	-57.4341
58.3	-59.6619							58.3	-66.1621						58.3	-57.4036
58.35	-59.6619							58.35	-66.1316						58.35	-57.1899
58.4	-59.3567							58.4	-66.1926						58.4	-57.1899
58.45	-59.4788							58.45	-65.9485						58.45	-57.4341
58.5	-59.7229							58.5	-65.8264						58.5	-57.5256
58.55	-59.4482							58.55	-65.918						58.55	-57.2815
58.6	-59.3567							58.6	-66.04						58.6	-57.373
58.65	-59.7534							58.65	-66.1621						58.65	-57.251
58.7	-59.7229							58.7	-66.1926						58.7	-57.0679
58.75	-59.2651							58.75	-66.1621						58.75	-57.0984
58.8	-59.7229							58.8	-65.979						58.8	-57.1899
58.85	-59.7839							58.85	-65.8264						58.85	-57.4341
58.9	-59.5398							58.9	-65.7959						58.9	-57.2815
58.95	-59.5093							58.95	-66.04						58.95	-57.2815
59	-59.7839							59	-66.1011						59	-57.1289
59.05	-59.7534							59.05	-66.1621						59.05	-57.0373
59.1	-59.3262							59.1	-66.0705						59.1	-56.9763
59.15	-59.7534							59.15	-66.04						59.15	-57.1899
59.2	-59.7839							59.2	-65.9485						59.2	-57.3425
59.25	-59.6008							59.25	-65.7654						59.25	-57.312
59.3	-59.5093							59.3	-65.7349						59.3	-57.4036
59.35	-59.845							59.35	-65.8569						59.35	-57.312
59.4	-59.7229							59.4	-66.2231						59.4	-57.1899
59.45	-59.5093							59.45	-66.1926						59.45	-57.0373
59.5	-59.6313							59.5	-66.1926						59.5	-57.0068
59.55	-59.906							59.55	-66.04						59.55	-57.2205
59.6	-59.7534							59.6	-66.1621						59.6	-57.312
59.65	-59.3872							59.65	-66.04						59.65	-57.4036
59.7	-59.6313							59.7	-65.8874						59.7	-57.373
59.75	-59.8144							59.75	-65.7959						59.75	-57.1594
59.8	-59.6313							59.8	-65.9485						59.8	-57.0984
59.85	-59.2346							59.85	-66.2537						59.85	-57.2815
59.9	-59.6313							59.9	-66.2842						59.9	-57.2815
59.95	-59.7534							59.95	-66.2231						59.95	-57.251
60	-59.6008							60	-66.2231						60	-57.0679
60.05	-59.2041							60.05	-66.3147						60.05	-57.3425
60.1	-59.6313							60.1	-66.1316						60.1	-57.2815
60.15	-59.6924							60.15	-65.918						60.15	-56.9458
60.2	-59.6008							60.2	-65.979						60.2	-57.312
60.25	-59.2957							60.25	-66.3757						60.25	-57.312
60.3	-59.6619							60.3	-66.3452						60.3	-56.8848
60.35	-59.7534							60.35	-66.2537						60.35	-57.4646
60.4	-59.6313							60.4	-66.0705						60.4	-57.3425
60.45	-59.3262							60.45	-66.04						60.45	-57.0068
60.5	-59.6313							60.5	-66.3757						60.5	-57.4341
60.55	-59.7839							60.55	-66.2537						60.55	-57.312
60.6	-59.6008							60.6	-65.9485						60.6	-57.312
60.65	-59.3567							60.65	-66.2537						60.65	-57.312
60.7	-59.3872							60.7	-66.2842						60.7	-57.0679
60.75	-59.6619							60.75	-66.0095						60.75	-57.4341
60.8	-59.6008							60.8	-66.3452						60.8	-57.3425
60.85	-59.3567							60.85	-66.3147						60.85	-57.1289
60.9	-59.2041							60.9	-65.8874						60.9	-57.3425
60.95	-59.4788							60.95	-66.3452						60.95	-57.1594
61	-59.7229							61	-66.2537						61	-57.312
61.05	-59.5093							61.05	-65.979						61.05	-57.3425
61.1	-59.2651							61.1	-66.4673						61.1	-56.8542
61.15	-59.2957							61.15	-66.1011						61.15	-57.2815
61.2	-59.6619							61.2	-66.1926						61.2	-57.2205
61.25	-59.5703							61.25	-66.3452						61.25	-57.0373
61.3	-59.4482							61.3	-66.0705						61.3	-57.251
61.35	-59.2346							61.35	-66.4062						61.35	-57.1289
61.4	-59.4177							61.4	-66.2537						61.4	-57.1289
61.45	-59.6619							61.45	-66.1011						61.45	-57.3425
61.5	-59.6008							61.5	-66.4368						61.5	-57.0373
61.55	-59.4788							61.55	-66.2537						61.55	-57.1899
61.6	-59.2041							61.6	-66.1926						61.6	-57.2815
61.65	-59.4177							61.65	-66.5283						61.65	-57.1289
61.7	-59.6313							61.7	-66.2231						61.7	-57.0373
61.75	-59.6313							61.75	-66.2537						61.75	-57.251
61.8	-59.4788							61.8	-66.4978						61.8	-57.1594
61.85	-59.1736							61.85	-66.2537						61.85	-56.9763
61.9	-59.3872							61.9	-66.2537						61.9	-57.2815
61.95	-59.6313							61.95	-66.4673						61.95	-57.0373
62	-59.5398							62	-66.2537						62	-56.8848
62.05	-59.4177							62.05	-66.1316						62.05	-57.2205
62.1	-59.2346							62.1	-66.5588						62.1	-57.2205
62.15	-59.2041							62.15	-66.3757						62.15	-56.8542
62.2	-59.4482							62.2	-66.0095						62.2	-57.0373
62.25	-59.5703							62.25	-66.4673						62.25	-57.1899
62.3	-59.3872							62.3	-66.4978						62.3	-56.9763
62.35	-59.2041							62.35	-66.1621						62.35	-57.0068
62.4	-59.082							62.4	-66.3452						62.4	-57.1289
62.45	-59.2346							62.45	-66.4368						62.45	-57.1594
62.5	-59.5398							62.5	-66.2537						62.5	-56.9153
62.55	-59.4482							62.55	-66.1316						62.55	-57.0984
62.6	-59.4482							62.6	-66.4978						62.6	-57.1289
62.65	-59.2041							62.65	-66.3757						62.65	-57.0984
62.7	-59.082							62.7	-65.979						62.7	-56.9763
62.75	-59.3262							62.75	-66.4062						62.75	-57.1289
62.8	-59.6008							62.8	-66.4368						62.8	-57.1289
62.85	-59.5398							62.85	-66.1011						62.85	-56.8542
62.9	-59.4482							62.9	-66.1011						62.9	-57.0373
62.95	-59.3262							62.95	-66.4673						62.95	-57.0679
63	-59.1736							63	-66.4062						63	-57.0373
63.05	-59.3567							63.05	-65.979						63.05	-56.7017
63.1	-59.4482							63.1	-66.3452						63.1	-57.0373
63.15	-59.5703							63.15	-66.4368						63.15	-57.1594
63.2	-59.4482							63.2	-66.2842						63.2	-56.9458
63.25	-59.3872							63.25	-65.979						63.25	-56.7322
63.3	-59.082							63.3	-66.4062						63.3	-57.1594
63.35	-59.1736							63.35	-66.3757						63.35	-57.0984
63.4	-59.3872							63.4	-66.1621						63.4	-56.9458
63.45	-59.5093							63.45	-66.04						63.45	-56.8542
63.5	-59.4788							63.5	-66.4673						63.5	-57.1594
63.55	-59.4177							63.55	-66.3757						63.55	-57.0984
63.6	-59.2651							63.6	-66.1316						63.6	-56.8542
63.65	-59.1736							63.65	-66.0705						63.65	-56.8848
63.7	-59.1431							63.7	-66.4368						63.7	-57.1594
63.75	-59.2957							63.75	-66.4673						63.75	-57.0068
63.8	-59.4788							63.8	-66.0705						63.8	-56.7932
63.85	-59.5703							63.85	-66.1011						63.85	-56.7627
63.9	-59.4482							63.9	-66.4368						63.9	-57.0984
63.95	-59.4177							63.95	-66.4368						63.95	-56.9763
64	-59.2651							64	-66.1011						64	-56.8848
64.05	-59.2346							64.05	-66.0095						64.05	-56.6711
64.1	-59.2346							64.1	-66.4673						64.1	-57.0068
64.15	-59.2957							64.15	-66.4062						64.15	-56.9763
64.2	-59.5398							64.2	-66.2537						64.2	-56.8237
64.25	-59.6619							64.25	-65.9485						64.25	-56.5491
64.3	-59.4788							64.3	-66.3452						64.3	-56.8237
64.35	-59.4177							64.35	-66.3452						64.35	-56.9763
64.4	-59.3567							64.4	-66.2842						64.4	-56.9153
64.45	-59.2651							64.45	-65.8874						64.45	-56.6406
64.5	-59.1736							64.5	-66.1621						64.5	-56.7017
64.55	-59.2651							64.55	-66.4062						64.55	-57.0373
64.6	-59.4788							64.6	-66.3452						64.6	-56.9458
64.65	-59.5093							64.65	-66.1316						64.65	-56.7627
64.7	-59.4177							64.7	-66.04						64.7	-56.5491
64.75	-59.2651							64.75	-66.3757						64.75	-56.9153
64.8	-59.1125							64.8	-66.3147						64.8	-57.0373
64.85	-59.4177							64.85	-66.2231						64.85	-56.8542
64.9	-59.4788							64.9	-65.979						64.9	-56.7017
64.95	-59.2957							64.95	-66.2537						64.95	-56.7017
65	-59.0515							65	-66.4062						65	-56.8542
65.05	-59.4177							65.05	-66.3757						65.05	-56.9153
65.1	-59.5093							65.1	-66.1926						65.1	-56.8237
65.15	-59.1431							65.15	-66.0095						65.15	-56.6101
65.2	-59.3872							65.2	-66.2842						65.2	-56.6711
65.25	-59.5093							65.25	-66.4062						65.25	-56.9458
65.3	-59.2957							65.3	-66.3147						65.3	-56.8848
65.35	-59.4482							65.35	-66.2537						65.35	-56.9153
65.4	-59.5398							65.4	-66.04						65.4	-56.7017
65.45	-59.1431							65.45	-66.1621						65.45	-56.7932
65.5	-59.6008							65.5	-66.3757						65.5	-57.0373
65.55	-59.6008							65.55	-66.2842						65.55	-57.0373
65.6	-59.1125							65.6	-66.2842						65.6	-57.0679
65.65	-59.5398							65.65	-65.918						65.65	-56.8848
65.7	-59.3872							65.7	-66.1621						65.7	-56.8237
65.75	-59.2651							65.75	-66.4062						65.75	-57.0373
65.8	-59.5398							65.8	-66.3757						65.8	-57.1594
65.85	-59.0515							65.85	-66.2842						65.85	-57.1594
65.9	-59.4482							65.9	-66.1011						65.9	-56.9458
65.95	-59.4482							65.95	-66.04						65.95	-56.8848
66	-59.1431							66	-66.2842						66	-56.9153
66.05	-59.5398							66.05	-66.3757						66.05	-57.1594
66.1	-59.2957							66.1	-66.2842						66.1	-57.0984
66.15	-59.3567							66.15	-66.1621						66.15	-57.0984
66.2	-59.5093							66.2	-65.979						66.2	-56.9458
66.25	-59.1736							66.25	-66.1011						66.25	-56.8848
66.3	-59.3872							66.3	-66.2537						66.3	-57.0068
66.35	-59.6008							66.35	-66.2842						66.35	-57.1899
66.4	-59.2041							66.4	-66.3147						66.4	-57.0984
66.45	-59.4788							66.45	-66.1926						66.45	-57.2205
66.5	-59.5093							66.5	-65.8874						66.5	-57.0679
66.55	-59.1736							66.55	-65.9485						66.55	-56.8848
66.6	-59.5398							66.6	-66.2537						66.6	-57.0068
66.65	-59.4788							66.65	-66.3452						66.65	-57.3425
66.7	-59.2346							66.7	-66.1926						66.7	-57.373
66.75	-59.4788							66.75	-66.1316						66.75	-57.2205
66.8	-59.5398							66.8	-66.04						66.8	-57.1899
66.85	-59.2957							66.85	-65.918						66.85	-57.1594
66.9	-59.1431							66.9	-66.1316						66.9	-56.9763
66.95	-59.5703							66.95	-66.2842						66.95	-57.1289
67	-59.4177							67	-66.3452						67	-57.312
67.05	-58.9905							67.05	-66.2537						67.05	-57.3425
67.1	-59.5398							67.1	-66.1621						67.1	-57.2815
67.15	-59.2651							67.15	-65.979						67.15	-57.1899
67.2	-59.0515							67.2	-65.9485						67.2	-57.0984
67.25	-59.2651							67.25	-66.1011						67.25	-57.0068
67.3	-59.5398							67.3	-66.3452						67.3	-57.1289
67.35	-59.2346							67.35	-66.3147						67.35	-57.2815
67.4	-59.082							67.4	-66.3147						67.4	-57.3425
67.45	-59.4482							67.45	-66.2842						67.45	-57.1594
67.5	-59.4788							67.5	-66.1011						67.5	-57.2815
67.55	-59.1125							67.55	-65.9485						67.55	-57.1899
67.6	-59.3567							67.6	-66.04						67.6	-57.0679
67.65	-59.5703							67.65	-66.2842						67.65	-57.0679
67.7	-59.4482							67.7	-66.4062						67.7	-57.3425
67.75	-59.082							67.75	-66.3147						67.75	-57.4341
67.8	-59.4482							67.8	-66.3452						67.8	-57.4036
67.85	-59.6313							67.85	-66.2842						67.85	-57.3425
67.9	-59.2346							67.9	-66.2537						67.9	-57.373
67.95	-59.1736							67.95	-66.04						67.95	-57.1899
68	-59.5093							68	-65.979						68	-57.1289
68.05	-59.5703							68.05	-66.04						68.05	-57.4036
68.1	-59.3262							68.1	-66.3452						68.1	-57.5256
68.15	-59.1736							68.15	-66.2842						68.15	-57.4036
68.2	-59.5703							68.2	-66.3147						68.2	-57.1899
68.25	-59.4482							68.25	-66.3147						68.25	-57.2815
68.3	-59.2651							68.3	-66.2842						68.3	-57.373
68.35	-59.2651							68.35	-66.1011						68.35	-57.373
68.4	-59.5398							68.4	-66.0095						68.4	-57.1899
68.45	-59.5093							68.45	-65.8874						68.45	-57.4341
68.5	-59.2346							68.5	-66.0705						68.5	-57.4036
68.55	-59.2041							68.55	-66.2842						68.55	-57.1594
68.6	-59.5093							68.6	-66.1926						68.6	-57.4341
68.65	-59.5703							68.65	-66.1621						68.65	-57.4951
68.7	-59.1736							68.7	-65.9485						68.7	-57.0984
68.75	-59.2041							68.75	-66.1621						68.75	-57.5256
68.8	-59.5398							68.8	-66.2537						68.8	-57.5561
68.85	-59.5093							68.85	-66.1926						68.85	-57.1899
68.9	-59.2957							68.9	-65.979						68.9	-57.5256
68.95	-59.1125							68.95	-66.2537						68.95	-57.4951
69	-59.5398							69	-66.1926						69	-57.373
69.05	-59.5398							69.05	-65.8874						69.05	-57.5561
69.1	-59.4788							69.1	-66.3147						69.1	-57.2205
69.15	-59.021							69.15	-66.1316						69.15	-57.5256
69.2	-59.3872							69.2	-65.8874						69.2	-57.4951
69.25	-59.5703							69.25	-66.4062						69.25	-57.1899
69.3	-59.4482							69.3	-66.1316						69.3	-57.5256
69.35	-59.1431							69.35	-66.1011						69.35	-57.2815
69.4	-59.2041							69.4	-66.1926						69.4	-57.4036
69.45	-59.5703							69.45	-65.7349						69.45	-57.4951
69.5	-59.4482							69.5	-66.3452						69.5	-57.0679
69.55	-59.2651							69.55	-66.0095						69.55	-57.4036
69.6	-59.082							69.6	-65.9485						69.6	-57.5256
69.65	-59.2957							69.65	-66.2537						69.65	-57.1899
69.7	-59.5398							69.7	-65.8264						69.7	-57.4951
69.75	-59.4788							69.75	-66.2231						69.75	-57.4036
69.8	-59.2346							69.8	-66.1621						69.8	-57.3425
69.85	-58.9905							69.85	-65.7654						69.85	-57.5867
69.9	-59.4788							69.9	-66.2231						69.9	-57.3425
69.95	-59.5398							69.95	-66.04						69.95	-57.312
70	-59.4482							70	-65.8569						70	-57.5867
70.05	-59.2957							70.05	-66.1011						70.05	-57.5256
70.1	-59.3262							70.1	-66.0095						70.1	-57.2815
70.15	-59.6008							70.15	-65.9485						70.15	-57.5561
70.2	-59.5703							70.2	-66.1926						70.2	-57.4951
70.25	-59.5093							70.25	-65.8874						70.25	-57.251
70.3	-59.3567							70.3	-65.8874						70.3	-57.5867
70.35	-59.2346							70.35	-66.1621						70.35	-57.5256
70.4	-59.4177							70.4	-66.04						70.4	-57.2815
70.45	-59.6313							70.45	-65.7349						70.45	-57.5561
70.5	-59.5703							70.5	-66.2537						70.5	-57.6172
70.55	-59.4482							70.55	-66.1316						70.55	-57.4341
70.6	-59.2651							70.6	-65.7043						70.6	-57.3425
70.65	-59.2957							70.65	-66.1011						70.65	-57.7393
70.7	-59.6008							70.7	-66.1316						70.7	-57.5561
70.75	-59.5093							70.75	-65.9485						70.75	-57.2815
70.8	-59.4482							70.8	-65.8569						70.8	-57.6172
70.85	-59.2957							70.85	-66.1621						70.85	-57.6782
70.9	-59.1431							70.9	-65.979						70.9	-57.5561
70.95	-59.5398							70.95	-65.7349						70.95	-57.4951
71	-59.6924							71	-66.0705						71	-57.7087
71.05	-59.5398							71.05	-66.04						71.05	-57.5867
71.1	-59.4177							71.1	-65.8569						71.1	-57.3425
71.15	-59.3262							71.15	-65.9485						71.15	-57.6172
71.2	-59.2957							71.2	-66.04						71.2	-57.6172
71.25	-59.5398							71.25	-65.979						71.25	-57.4951
71.3	-59.6924							71.3	-65.7043						71.3	-57.373
71.35	-59.6313							71.35	-66.04						71.35	-57.6782
71.4	-59.6619							71.4	-66.0095						71.4	-57.6172
71.45	-59.3872							71.45	-65.8569						71.45	-57.2815
71.5	-59.3567							71.5	-65.7349						71.5	-57.4341
71.55	-59.5093							71.55	-66.1316						71.55	-57.6172
71.6	-59.7229							71.6	-66.1316						71.6	-57.6172
71.65	-59.6313							71.65	-65.7959						71.65	-57.251
71.7	-59.5703							71.7	-65.7959						71.7	-57.6172
71.75	-59.5093							71.75	-66.0705						71.75	-57.6172
71.8	-59.2651							71.8	-66.0705						71.8	-57.5561
71.85	-59.3567							71.85	-65.7043						71.85	-57.1899
71.9	-59.5093							71.9	-65.8264						71.9	-57.6477
71.95	-59.6924							71.95	-66.0705						71.95	-57.6782
72	-59.6619							72	-65.979						72	-57.4951
72.05	-59.6313							72.05	-65.6738						72.05	-57.2815
72.1	-59.4177							72.1	-65.8569						72.1	-57.5867
72.15	-59.2651							72.15	-66.1316						72.15	-57.7087
72.2	-59.2957							72.2	-65.979						72.2	-57.4341
72.25	-59.5703							72.25	-65.6738						72.25	-57.312
72.3	-59.6619							72.3	-65.918						72.3	-57.5867
72.35	-59.6313							72.35	-66.1316						72.35	-57.6477
72.4	-59.6313							72.4	-66.0705						72.4	-57.5561
72.45	-59.6008							72.45	-65.7349						72.45	-57.1289
72.5	-59.4177							72.5	-65.8264						72.5	-57.4036
72.55	-59.2346							72.55	-66.1621						72.55	-57.5561
72.6	-59.3567							72.6	-66.1316						72.6	-57.4951
72.65	-59.5398							72.65	-65.9485						72.65	-57.2815
72.7	-59.5398							72.7	-65.8874						72.7	-57.2205
72.75	-59.6924							72.75	-66.1926						72.75	-57.6172
72.8	-59.5703							72.8	-66.2231						72.8	-57.4951
72.85	-59.5093							72.85	-65.979						72.85	-57.251
72.9	-59.4177							72.9	-65.7654						72.9	-57.0984
72.95	-59.2041							72.95	-66.0705						72.95	-57.4341
73	-59.4788							73	-66.2231						73	-57.4646
73.05	-59.6619							73.05	-66.0705						73.05	-57.3425
73.1	-59.5703							73.1	-65.8264						73.1	-57.251
73.15	-59.4482							73.15	-65.8874						73.15	-57.1289
73.2	-59.2041							73.2	-66.1621						73.2	-57.4036
73.25	-59.5093							73.25	-66.1011						73.25	-57.3425
73.3	-59.6619							73.3	-66.0095						73.3	-57.1594
73.35	-59.4788							73.35	-65.7349						73.35	-56.9458
73.4	-59.1736							73.4	-66.0095						73.4	-57.1289
73.45	-59.7229							73.45	-66.2231						73.45	-57.312
73.5	-59.7229							73.5	-66.1011						73.5	-57.1899
73.55	-59.1736							73.55	-65.9485						73.55	-57.0984
73.6	-59.6008							73.6	-65.7959						73.6	-56.8237
73.65	-59.7229							73.65	-66.0705						73.65	-57.0068
73.7	-59.2346							73.7	-66.2537						73.7	-57.1899
73.75	-59.6313							73.75	-66.1316						73.75	-57.0984
73.8	-59.7229							73.8	-66.1926						73.8	-57.0373
73.85	-59.3567							73.85	-65.979						73.85	-56.7932
73.9	-59.7839							73.9	-66.0705						73.9	-56.8848
73.95	-59.5398							73.95	-66.2842						73.95	-57.0679
74	-59.4177							74	-66.3452						74	-57.1289
74.05	-59.6924							74.05	-66.2231						74.05	-57.0373
74.1	-59.2957							74.1	-66.0095						74.1	-56.8848
74.15	-59.5703							74.15	-66.04						74.15	-56.7627
74.2	-59.6924							74.2	-66.4062						74.2	-56.9763
74.25	-59.2346							74.25	-66.3757						74.25	-57.0068
74.3	-59.6313							74.3	-66.2842						74.3	-57.0068
74.35	-59.4788							74.35	-66.1621						74.35	-56.8848
74.4	-59.4177							74.4	-65.979						74.4	-56.7017
74.45	-59.6008							74.45	-66.3452						74.45	-56.7627
74.5	-59.2346							74.5	-66.3452						74.5	-56.9763
74.55	-59.5703							74.55	-66.3757						74.55	-56.9153
74.6	-59.6313							74.6	-66.3757						74.6	-56.9153
74.65	-59.1431							74.65	-66.1926						74.65	-56.7627
74.7	-59.6924							74.7	-65.979						74.7	-56.6101
74.75	-59.6924							74.75	-66.4062						74.75	-56.6101
74.8	-59.1431							74.8	-66.4673						74.8	-56.8542
74.85	-59.6619							74.85	-66.4368						74.85	-56.9153
74.9	-59.6313							74.9	-66.3147						74.9	-56.7932
74.95	-59.2957							74.95	-66.1926						74.95	-56.7627
75	-59.6008							75	-66.1011						75	-56.427
75.05	-59.6619							75.05	-66.3452						75.05	-56.6406
75.1	-59.4788							75.1	-66.4978						75.1	-56.7627
75.15	-59.5703							75.15	-66.4062						75.15	-56.7627
75.2	-59.7534							75.2	-66.3452						75.2	-56.7322
75.25	-59.4482							75.25	-66.2842						75.25	-56.8237
75.3	-59.3262							75.3	-66.0095						75.3	-56.6711
75.35	-59.7229							75.35	-66.1011						75.35	-56.488
75.4	-59.6313							75.4	-66.3147						75.4	-56.427
75.45	-59.2651							75.45	-66.4978						75.45	-56.6711
75.5	-59.6313							75.5	-66.4368						75.5	-56.7017
75.55	-59.6313							75.55	-66.3757						75.55	-56.6711
75.6	-59.5093							75.6	-66.1316						75.6	-56.6711
75.65	-59.3567							75.65	-66.1316						75.65	-56.5186
75.7	-59.6619							75.7	-66.1011						75.7	-56.366
75.75	-59.6619							75.75	-66.3147						75.75	-56.3354
75.8	-59.1736							75.8	-66.3452						75.8	-56.5491
75.85	-59.5398							75.85	-66.5588						75.85	-56.6406
75.9	-59.6313							75.9	-66.4062						75.9	-56.7627
75.95	-59.5398							75.95	-66.3147						75.95	-56.6406
76	-59.2957							76	-66.1316						76	-56.5491
76.05	-59.6619							76.05	-66.04						76.05	-56.5186
76.1	-59.5703							76.1	-66.1926						76.1	-56.366
76.15	-59.4788							76.15	-66.3757						76.15	-56.488
76.2	-59.4482							76.2	-66.4062						76.2	-56.6101
76.25	-59.7229							76.25	-66.4673						76.25	-56.6711
76.3	-59.6008							76.3	-66.3757						76.3	-56.6711
76.35	-59.3262							76.35	-66.3757						76.35	-56.5796
76.4	-59.5703							76.4	-66.2231						76.4	-56.3049
76.45	-59.7534							76.45	-66.1621						76.45	-56.3965
76.5	-59.6619							76.5	-66.0705						76.5	-56.6711
76.55	-59.2346							76.55	-66.1621						76.55	-56.5186
76.6	-59.6313							76.6	-66.2537						76.6	-56.427
76.65	-59.7229							76.65	-66.4673						76.65	-56.3049
76.7	-59.6008							76.7	-66.5283						76.7	-56.5186
76.75	-59.3567							76.75	-66.3452						76.75	-56.4575
76.8	-59.5093							76.8	-66.3452						76.8	-56.2439
76.85	-59.6924							76.85	-66.1621						76.85	-56.5796
76.9	-59.6008							76.9	-66.0095						76.9	-56.488
76.95	-59.1736							76.95	-66.1926						76.95	-56.0913
77	-59.5398							77	-66.4368						77	-56.5186
77.05	-59.6924							77.05	-66.3147						77.05	-56.427
77.1	-59.6313							77.1	-66.1011						77.1	-56.1523
77.15	-59.2651							77.15	-66.0705						77.15	-56.488
77.2	-59.4482							77.2	-66.2842						77.2	-56.366
77.25	-59.7839							77.25	-66.2537						77.25	-56.3049
77.3	-59.6313							77.3	-65.9485						77.3	-56.488
77.35	-59.3872							77.35	-66.3452						77.35	-56.1218
77.4	-59.3872							77.4	-66.2231						77.4	-56.5186
77.45	-59.7534							77.45	-65.7959						77.45	-56.3354
77.5	-59.6313							77.5	-66.3757						77.5	-56.2134
77.55	-59.5703							77.55	-66.2537						77.55	-56.4575
77.6	-59.3567							77.6	-65.979						77.6	-56.1523
77.65	-59.6313							77.65	-66.2842						77.65	-56.3965
77.7	-59.7534							77.7	-66.1011						77.7	-56.3049
77.75	-59.6924							77.75	-66.2231						77.75	-56.0303
77.8	-59.4482							77.8	-66.2537						77.8	-56.3965
77.85	-59.3872							77.85	-65.8874						77.85	-56.2439
77.9	-59.7534							77.9	-66.4368						77.9	-56.2744
77.95	-59.6924							77.95	-66.1926						77.95	-56.366
78	-59.5398							78	-66.0095						78	-56.1523
78.05	-59.2957							78.05	-66.3147						78.05	-56.3965
78.1	-59.5093							78.1	-65.979						78.1	-56.2744
78.15	-59.6619							78.15	-66.2842						78.15	-55.9082
78.2	-59.5703							78.2	-66.2537						78.2	-56.4575
78.25	-59.5703							78.25	-65.8569						78.25	-56.427
78.3	-59.2651							78.3	-66.4062						78.3	-55.9998
78.35	-59.5093							78.35	-66.3452						78.35	-56.3354
78.4	-59.6619							78.4	-65.8569						78.4	-56.427
78.45	-59.6619							78.45	-66.3147						78.45	-56.1523
78.5	-59.5093							78.5	-66.3452						78.5	-56.3049
78.55	-59.2957							78.55	-65.9485						78.55	-56.3049
78.6	-59.5093							78.6	-66.3147						78.6	-56.1523
78.65	-59.6924							78.65	-66.2231						78.65	-56.2134
78.7	-59.6313							78.7	-65.9485						78.7	-56.366
78.75	-59.5093							78.75	-66.2842						78.75	-56.1218
78.8	-59.3567							78.8	-66.3147						78.8	-56.0608
78.85	-59.3567							78.85	-65.979						78.85	-56.3965
78.9	-59.6924							78.9	-66.1621						78.9	-56.2744
78.95	-59.6008							78.95	-66.3147						78.95	-55.9387
79	-59.5398							79	-66.1926						79	-56.2439
79.05	-59.4177							79.05	-65.9485						79.05	-56.366
79.1	-59.2041							79.1	-66.3452						79.1	-56.1829
79.15	-59.4788							79.15	-66.3147						79.15	-56.1523
79.2	-59.6008							79.2	-66.0095						79.2	-56.366
79.25	-59.4788							79.25	-66.2231						79.25	-56.3049
79.3	-59.4788							79.3	-66.2842						79.3	-56.0303
79.35	-59.3567							79.35	-66.1011						79.35	-56.366
79.4	-59.2041							79.4	-66.0095						79.4	-56.3354
79.45	-59.3567							79.45	-66.4368						79.45	-56.2134
79.5	-59.5703							79.5	-66.3147						79.5	-56.1218
79.55	-59.5093							79.55	-66.0095						79.55	-56.3354
79.6	-59.5093							79.6	-66.1926						79.6	-56.3049
79.65	-59.3262							79.65	-66.3757						79.65	-55.9387
79.7	-59.2651							79.7	-66.2537						79.7	-56.2134
79.75	-59.5093							79.75	-65.979						79.75	-56.3049
79.8	-59.5703							79.8	-66.2231						79.8	-56.1218
79.85	-59.5703							79.85	-66.2842						79.85	-55.9692
79.9	-59.5398							79.9	-66.1926						79.9	-56.3354
79.95	-59.4482							79.95	-66.0095						79.95	-56.2439
80	-59.2346							80	-66.4062						80	-56.2134
80.05	-59.1736							80.05	-66.2842						80.05	-56.0303
80.1	-59.5398							80.1	-66.2537						80.1	-56.427
80.15	-59.6619							80.15	-66.0705						80.15	-56.366
80.2	-59.5703							80.2	-66.4673						80.2	-56.1218
80.25	-59.6313							80.25	-66.2537						80.25	-56.1829
80.3	-59.4482							80.3	-66.1926						80.3	-56.5186
80.35	-59.2346							80.35	-66.04						80.35	-56.427
80.4	-59.2957							80.4	-66.4368						80.4	-56.2134
80.45	-59.4482							80.45	-66.3147						80.45	-56.1829
80.5	-59.6008							80.5	-66.1621						80.5	-56.4575
80.55	-59.6313							80.55	-66.04						80.55	-56.3965
80.6	-59.5703							80.6	-66.3757						80.6	-56.2134
80.65	-59.5093							80.65	-66.3757						80.65	-56.0608
80.7	-59.3872							80.7	-66.1926						80.7	-56.3965
80.75	-59.3262							80.75	-65.979						80.75	-56.2744
80.8	-59.3567							80.8	-66.2537						80.8	-56.1829
80.85	-59.5398							80.85	-66.3757						80.85	-55.9998
80.9	-59.6619							80.9	-66.2231						80.9	-56.3049
80.95	-59.7839							80.95	-65.9485						80.95	-56.3049
81	-59.6924							81	-66.1316						81	-56.1829
81.05	-59.5703							81.05	-66.4062						81.05	-55.9692
81.1	-59.5398							81.1	-66.3452						81.1	-56.2439
81.15	-59.3872							81.15	-66.04						81.15	-56.4575
81.2	-59.4177							81.2	-65.918						81.2	-56.2439
81.25	-59.5703							81.25	-66.2537						81.25	-56.0608
81.3	-59.7229							81.3	-66.2842						81.3	-56.1523
81.35	-59.6924							81.35	-66.1621						81.35	-56.3965
81.4	-59.5398							81.4	-66.0095						81.4	-56.366
81.45	-59.2651							81.45	-66.04						81.45	-56.1829
81.5	-59.6619							81.5	-66.2537						81.5	-56.0303
81.55	-59.7229							81.55	-66.1926						81.55	-56.3354
81.6	-59.6313							81.6	-66.1316						81.6	-56.488
81.65	-59.3262							81.65	-65.8874						81.65	-56.3354
81.7	-59.6313							81.7	-66.1011						81.7	-56.0913
81.75	-59.6619							81.75	-66.2231						81.75	-56.0303
81.8	-59.5093							81.8	-66.2231						81.8	-56.3354
81.85	-59.4788							81.85	-66.0705						81.85	-56.427
81.9	-59.7839							81.9	-65.7959						81.9	-56.3354
81.95	-59.5398							81.95	-66.04						81.95	-56.1218
82	-59.5398							82	-66.2231						82	-56.1829
82.05	-59.7839							82.05	-66.1926						82.05	-56.3354
82.1	-59.5703							82.1	-65.979						82.1	-56.3965
82.15	-59.6313							82.15	-65.7349						82.15	-56.366
82.2	-59.845							82.2	-65.979						82.2	-56.2744
82.25	-59.4177							82.25	-66.2231						82.25	-56.0303
82.3	-59.7839							82.3	-66.0705						82.3	-56.3049
82.35	-59.7839							82.35	-65.9485						82.35	-56.366
82.4	-59.4482							82.4	-65.7654						82.4	-56.366
82.45	-59.8144							82.45	-65.8264						82.45	-56.2439
82.5	-59.5703							82.5	-66.1316						82.5	-55.9998
82.55	-59.6619							82.55	-66.0705						82.55	-56.2744
82.6	-59.7839							82.6	-66.0705						82.6	-56.4575
82.65	-59.3567							82.65	-65.918						82.65	-56.3965
82.7	-59.7839							82.7	-65.6738						82.7	-56.2744
82.75	-59.6313							82.75	-65.8569						82.75	-56.1829
82.8	-59.3567							82.8	-66.1011						82.8	-56.1523
82.85	-59.7534							82.85	-66.1011						82.85	-56.2744
82.9	-59.6008							82.9	-66.04						82.9	-56.3965
82.95	-59.4482							82.95	-65.8264						82.95	-56.366
83	-59.7534							83	-65.6128						83	-56.2744
83.05	-59.5398							83.05	-65.8874						83.05	-56.0913
83.1	-59.5093							83.1	-66.1011						83.1	-56.0913
83.15	-59.7534							83.15	-66.04						83.15	-56.366
83.2	-59.4788							83.2	-65.9485						83.2	-56.3965
83.25	-59.5398							83.25	-65.979						83.25	-56.3965
83.3	-59.7839							83.3	-65.6738						83.3	-56.3965
83.35	-59.5703							83.35	-65.7959						83.35	-56.2134
83.4	-59.3567							83.4	-66.04						83.4	-56.2134
83.45	-59.8144							83.45	-66.1926						83.45	-56.3965
83.5	-59.7534							83.5	-66.04						83.5	-56.5796
83.55	-59.2957							83.55	-65.9485						83.55	-56.4575
83.6	-59.6924							83.6	-65.8569						83.6	-56.488
83.65	-59.6619							83.65	-65.7043						83.65	-56.427
83.7	-59.2957							83.7	-65.8874						83.7	-56.2439
83.75	-59.4177							83.75	-66.1316						83.75	-56.1523
83.8	-59.6313							83.8	-66.1926						83.8	-56.366
83.85	-59.5398							83.85	-66.1316						83.85	-56.5186
83.9	-59.2651							83.9	-66.04						83.9	-56.3965
83.95	-59.6313							83.95	-65.8569						83.95	-56.488
84	-59.6008							84	-65.8264						84	-56.2744
84.05	-59.2957							84.05	-65.7959						84.05	-56.1218
84.1	-59.5398							84.1	-66.04						84.1	-56.1829
84.15	-59.6008							84.15	-66.0705						84.15	-56.366
84.2	-59.5093							84.2	-66.0095						84.2	-56.488
84.25	-59.1736							84.25	-65.979						84.25	-56.5186
84.3	-59.6619							84.3	-65.918						84.3	-56.5491
84.35	-59.5703							84.35	-65.7959						84.35	-56.4575
84.4	-59.3567							84.4	-65.6433						84.4	-56.366
84.45	-59.3567							84.45	-65.6433						84.45	-56.2744
84.5	-59.7534							84.5	-65.8264						84.5	-56.3049
84.55	-59.6313							84.55	-66.04						84.55	-56.5186
84.6	-59.3567							84.6	-65.979						84.6	-56.5491
84.65	-59.4177							84.65	-65.918						84.65	-56.488
84.7	-59.7229							84.7	-65.9485						84.7	-56.5491
84.75	-59.6008							84.75	-65.8874						84.75	-56.2439
84.8	-59.2346							84.8	-65.8264						84.8	-56.3965
84.85	-59.4788							84.85	-65.6128						84.85	-56.5796
84.9	-59.7229							84.9	-65.7043						84.9	-56.5186
84.95	-59.5703							84.95	-65.7959						84.95	-56.2744
85	-59.1736							85	-65.9485						85	-56.366
85.05	-59.4788							85.05	-66.0095						85.05	-56.5491
85.1	-59.6008							85.1	-66.04						85.1	-56.4575
85.15	-59.4177							85.15	-65.979						85.15	-56.2439
85.2	-59.2041							85.2	-65.8264						85.2	-56.5491
85.25	-59.5398							85.25	-65.5518						85.25	-56.4575
85.3	-59.5703							85.3	-65.8569						85.3	-56.1218
85.35	-59.5398							85.35	-66.1011						85.35	-56.6101
85.4	-59.1736							85.4	-65.979						85.4	-56.488
85.45	-59.5398							85.45	-65.7959						85.45	-56.3354
85.5	-59.5398							85.5	-65.7654						85.5	-56.488
85.55	-59.5398							85.55	-66.1926						85.55	-56.4575
85.6	-59.2346							85.6	-65.979						85.6	-56.5796
85.65	-59.3262							85.65	-65.7043						85.65	-56.5186
85.7	-59.6619							85.7	-66.1011						85.7	-56.2744
85.75	-59.5703							85.75	-65.979						85.75	-56.7627
85.8	-59.3872							85.8	-65.7043						85.8	-56.5491
85.85	-59.2346							85.85	-66.1316						85.85	-56.5186
85.9	-59.5703							85.9	-65.918						85.9	-56.6711
85.95	-59.6619							85.95	-65.8569						85.95	-56.427
86	-59.5703							86	-66.0095						86	-56.6101
86.05	-59.1431							86.05	-65.6738						86.05	-56.6711
86.1	-59.4482							86.1	-66.0705						86.1	-56.3965
86.15	-59.6924							86.15	-65.9485						86.15	-56.7017
86.2	-59.6008							86.2	-65.7043						86.2	-56.5186
86.25	-59.3567							86.25	-65.979						86.25	-56.6406
86.3	-59.2346							86.3	-65.8264						86.3	-56.7627
86.35	-59.5398							86.35	-65.9485						86.35	-56.3965
86.4	-59.5703							86.4	-66.04						86.4	-56.7932
86.45	-59.5398							86.45	-65.5823						86.45	-56.7932
86.5	-59.3262							86.5	-66.0095						86.5	-56.5186
86.55	-59.2041							86.55	-65.918						86.55	-56.8542
86.6	-59.5703							86.6	-65.7043						86.6	-56.8848
86.65	-59.6313							86.65	-66.1011						86.65	-56.6101
86.7	-59.5093							86.7	-65.7654						86.7	-56.7322
86.75	-59.3262							86.75	-65.8264						86.75	-56.8848
86.8	-59.4177							86.8	-66.0705						86.8	-56.7017
86.85	-59.6619							86.85	-65.7959						86.85	-56.7932
86.9	-59.6619							86.9	-65.7043						86.9	-56.9153
86.95	-59.6313							86.95	-66.1011						86.95	-56.7627
87	-59.5703							87	-65.979						87	-56.6406
87.05	-59.3567							87.05	-65.7043						87.05	-56.9153
87.1	-59.6008							87.1	-66.0705						87.1	-56.8848
87.15	-59.7534							87.15	-65.979						87.15	-56.5491
87.2	-59.6619							87.2	-65.7043						87.2	-56.8848
87.25	-59.6313							87.25	-66.04						87.25	-56.9153
87.3	-59.3567							87.3	-66.0705						87.3	-56.7932
87.35	-59.5398							87.35	-65.7654						87.35	-56.8237
87.4	-59.7534							87.4	-65.979						87.4	-56.8848
87.45	-59.7534							87.45	-66.0705						87.45	-56.8237
87.5	-59.6619							87.5	-65.8874						87.5	-56.7322
87.55	-59.4177							87.55	-65.7654						87.55	-56.9153
87.6	-59.3567							87.6	-66.0705						87.6	-57.0068
87.65	-59.5398							87.65	-65.9485						87.65	-56.8237
87.7	-59.7229							87.7	-65.7349						87.7	-56.8237
87.75	-59.6008							87.75	-65.8569						87.75	-56.9458
87.8	-59.5398							87.8	-66.04						87.8	-56.9763
87.85	-59.4482							87.85	-65.8264						87.85	-56.6406
87.9	-59.2957							87.9	-65.5823						87.9	-56.9458
87.95	-59.5398							87.95	-66.0095						87.95	-56.9153
88	-59.6619							88	-65.8874						88	-56.8542
88.05	-59.7229							88.05	-65.7654						88.05	-56.7017
88.1	-59.5398							88.1	-65.7043						88.1	-56.9763
88.15	-59.4177							88.15	-65.979						88.15	-56.8848
88.2	-59.2651							88.2	-65.9485						88.2	-56.7322
88.25	-59.5093							88.25	-65.6433						88.25	-56.7017
88.3	-59.7229							88.3	-65.7959						88.3	-57.0373
88.35	-59.6619							88.35	-65.918						88.35	-56.9153
88.4	-59.6313							88.4	-65.918						88.4	-56.6406
88.45	-59.5703							88.45	-65.5212						88.45	-56.7017
88.5	-59.4177							88.5	-65.8264						88.5	-57.0373
88.55	-59.2651							88.55	-65.918						88.55	-56.9153
88.6	-59.4482							88.6	-65.8874						88.6	-56.7017
88.65	-59.7229							88.65	-65.5518						88.65	-56.8542
88.7	-59.6924							88.7	-65.8264						88.7	-57.0373
88.75	-59.5398							88.75	-65.9485						88.75	-57.0373
88.8	-59.5398							88.8	-65.8874						88.8	-56.6101
88.85	-59.3567							88.85	-65.6128						88.85	-56.8542
88.9	-59.1125							88.9	-65.7654						88.9	-57.0679
88.95	-59.3567							88.95	-66.0095						88.95	-57.0984
89	-59.4788							89	-65.8874						89	-56.7932
89.05	-59.6008							89.05	-65.6738						89.05	-56.7017
89.1	-59.6008							89.1	-65.7043						89.1	-57.0373
89.15	-59.5398							89.15	-66.04						89.15	-57.0068
89.2	-59.4482							89.2	-65.979						89.2	-56.9458
89.25	-59.3567							89.25	-65.8264						89.25	-56.5796
89.3	-59.2346							89.3	-65.6738						89.3	-56.9458
89.35	-59.2651							89.35	-66.0095						89.35	-57.0068
89.4	-59.4482							89.4	-66.0095						89.4	-56.9763
89.45	-59.6008							89.45	-65.8569						89.45	-56.6711
89.5	-59.7229							89.5	-65.5212						89.5	-56.8542
89.55	-59.6008							89.55	-65.918						89.55	-57.1289
89.6	-59.4788							89.6	-66.0095						89.6	-57.0984
89.65	-59.3567							89.65	-65.9485						89.65	-56.8237
89.7	-59.3567							89.7	-65.5518						89.7	-56.7932
89.75	-59.5703							89.75	-65.6738						89.75	-57.1594
89.8	-59.6008							89.8	-66.0095						89.8	-57.1289
89.85	-59.4482							89.85	-65.918						89.85	-56.9763
89.9	-59.2651							89.9	-65.8264						89.9	-56.8237
89.95	-59.4482							89.95	-65.5518						89.95	-56.9763
90	-59.5703							90	-65.8264						90	-57.0984
90.05	-59.3872							90.05	-65.979						90.05	-57.0373
90.1	-59.1125							90.1	-65.979						90.1	-56.9458
90.15	-59.5703							90.15	-65.7959						90.15	-56.7932
90.2	-59.5703							90.2	-65.5518						90.2	-56.9153
90.25	-59.0515							90.25	-65.8874						90.25	-57.1289
90.3	-59.4482							90.3	-66.1011						90.3	-57.0068
90.35	-59.5398							90.35	-65.979						90.35	-56.8848
90.4	-59.0515							90.4	-65.7349						90.4	-56.7322
90.45	-59.6313							90.45	-65.6738						90.45	-56.8848
90.5	-59.3872							90.5	-65.918						90.5	-57.0984
90.55	-59.1736							90.55	-66.0705						90.55	-57.0373
90.6	-59.5703							90.6	-66.1011						90.6	-57.1289
90.65	-59.2957							90.65	-66.0095						90.65	-56.9153
90.7	-59.2957							90.7	-65.7654						90.7	-56.8237
90.75	-59.5398							90.75	-65.7959						90.75	-57.0984
90.8	-59.1431							90.8	-66.1621						90.8	-57.2205
90.85	-59.4482							90.85	-66.1621						90.85	-57.1594
90.9	-59.4788							90.9	-66.1316						90.9	-56.9458
90.95	-59.2346							90.95	-65.7959						90.95	-56.7322
91	-59.6619							91	-65.8569						91	-56.9763
91.05	-59.3262							91.05	-66.0705						91.05	-57.1289
91.1	-59.3567							91.1	-66.2231						91.1	-57.0373
91.15	-59.4482							91.15	-66.0705						91.15	-57.0373
91.2	-59.1736							91.2	-66.04						91.2	-56.9153
91.25	-59.4788							91.25	-65.7959						91.25	-56.6711
91.3	-59.4482							91.3	-65.8569						91.3	-56.9763
91.35	-59.0515							91.35	-65.979						91.35	-57.0679
91.4	-59.4482							91.4	-66.1926						91.4	-57.0068
91.45	-59.4482							91.45	-66.0705						91.45	-57.0373
91.5	-59.1736							91.5	-66.04						91.5	-56.9763
91.55	-59.3567							91.55	-65.8874						91.55	-56.7932
91.6	-59.4177							91.6	-65.7349						91.6	-56.8848
91.65	-59.1431							91.65	-65.918						91.65	-57.1289
91.7	-59.3262							91.7	-66.1316						91.7	-57.2205
91.75	-59.5093							91.75	-66.0705						91.75	-57.1594
91.8	-59.3872							91.8	-66.0705						91.8	-57.0679
91.85	-59.2346							91.85	-65.8874						91.85	-57.0373
91.9	-59.6008							91.9	-65.6738						91.9	-56.8542
91.95	-59.4788							91.95	-65.7654						91.95	-56.9763
92	-59.1431							92	-66.04						92	-57.251
92.05	-59.5703							92.05	-66.0705						92.05	-57.2205
92.1	-59.5093							92.1	-66.1316						92.1	-57.1899
92.15	-59.3872							92.15	-65.979						92.15	-57.0984
92.2	-59.3567							92.2	-65.8874						92.2	-56.8848
92.25	-59.5703							92.25	-65.6738						92.25	-56.8848
92.3	-59.4788							92.3	-65.8569						92.3	-57.0373
92.35	-59.0515							92.35	-65.979						92.35	-57.1899
92.4	-59.4177							92.4	-66.1621						92.4	-57.1899
92.45	-59.4788							92.45	-66.04						92.45	-57.1899
92.5	-59.3872							92.5	-66.1316						92.5	-57.2205
92.55	-59.1736							92.55	-66.0095						92.55	-57.0984
92.6	-59.6008							92.6	-65.8569						92.6	-57.0068
92.65	-59.4482							92.65	-65.7349						92.65	-56.8237
92.7	-59.1125							92.7	-65.8874						92.7	-57.2205
92.75	-59.2957							92.75	-66.1011						92.75	-57.312
92.8	-59.4482							92.8	-66.1621						92.8	-57.3425
92.85	-59.4482							92.85	-66.1316						92.85	-57.251
92.9	-59.082							92.9	-66.1621						92.9	-57.251
92.95	-59.4177							92.95	-66.1011						92.95	-57.1899
93	-59.5093							93	-65.8874						93	-56.9153
93.05	-59.4788							93.05	-65.7654						93.05	-57.2815
93.1	-59.1431							93.1	-65.7959						93.1	-57.373
93.15	-59.5093							93.15	-66.0095						93.15	-57.3425
93.2	-59.5093							93.2	-66.0705						93.2	-57.0984
93.25	-59.4177							93.25	-66.1926						93.25	-57.0984
93.3	-59.1125							93.3	-66.2537						93.3	-57.373
93.35	-59.5093							93.35	-66.1316						93.35	-57.2815
93.4	-59.6008							93.4	-66.0705						93.4	-56.9763
93.45	-59.4788							93.45	-65.8874						93.45	-57.251
93.5	-59.1736							93.5	-65.8569						93.5	-57.251
93.55	-59.5093							93.55	-65.8264						93.55	-57.0373
93.6	-59.5398							93.6	-66.1316						93.6	-57.373
93.65	-59.4177							93.65	-66.0705						93.65	-57.2815
93.7	-59.1125							93.7	-66.04						93.7	-57.0373
93.75	-59.4177							93.75	-65.7959						93.75	-57.4951
93.8	-59.5093							93.8	-65.979						93.8	-57.4341
93.85	-59.4177							93.85	-66.1621						93.85	-57.1289
93.9	-59.1431							93.9	-65.918						93.9	-57.4646
93.95	-59.2346							93.95	-65.7043						93.95	-57.4036
94	-59.5398							94	-66.1926						94	-57.4646
94.05	-59.4177							94.05	-66.0095						94.05	-57.4646
94.1	-59.2957							94.1	-65.6128						94.1	-57.1594
94.15	-59.1125							94.15	-66.1926						94.15	-57.5561
94.2	-59.4482							94.2	-65.8569						94.2	-57.4341
94.25	-59.3872							94.25	-65.7959						94.25	-57.2205
94.3	-59.4788							94.3	-66.0705						94.3	-57.4951
94.35	-59.1736							94.35	-65.7654						94.35	-57.1899
94.4	-59.2651							94.4	-65.979						94.4	-57.4646
94.45	-59.5703							94.45	-66.1011						94.45	-57.4951
94.5	-59.4788							94.5	-65.6433						94.5	-57.1594
94.55	-59.3567							94.55	-66.1316						94.55	-57.4951
94.6	-59.082							94.6	-65.918						94.6	-57.4036
94.65	-59.3872							94.65	-65.8569						94.65	-57.373
94.7	-59.6008							94.7	-66.1011						94.7	-57.5256
94.75	-59.4482							94.75	-65.7349						94.75	-57.312
94.8	-59.3262							94.8	-66.1621						94.8	-57.4036
94.85	-59.0515							94.85	-66.0095						94.85	-57.5256
94.9	-59.2957							94.9	-65.6738						94.9	-57.312
94.95	-59.4177							94.95	-66.1621						94.95	-57.4341
95	-59.3872							95	-65.918						95	-57.5867
95.05	-59.1736							95.05	-65.7654						95.05	-57.4646
95.1	-58.9905							95.1	-66.04						95.1	-57.3425
95.15	-59.3262							95.15	-65.8874						95.15	-57.4951
95.2	-59.4177							95.2	-65.7959						95.2	-57.4951
95.25	-59.4177							95.25	-66.04						95.25	-57.312
95.3	-59.2041							95.3	-65.7654						95.3	-57.5561
95.35	-59.021							95.35	-65.6433						95.35	-57.4646
95.4	-59.3872							95.4	-65.918						95.4	-57.2205
95.45	-59.4482							95.45	-66.04						95.45	-57.4036
95.5	-59.3872							95.5	-65.4907						95.5	-57.4646
95.55	-59.4177							95.55	-66.0095						95.55	-57.1594
95.6	-59.1125							95.6	-65.979						95.6	-57.3425
95.65	-59.1736							95.65	-65.7043						95.65	-57.4951
95.7	-59.3567							95.7	-65.918						95.7	-57.373
95.75	-59.5093							95.75	-65.9485						95.75	-57.251
95.8	-59.4482							95.8	-65.8569						95.8	-57.4951
95.85	-59.2651							95.85	-65.7043						95.85	-57.6172
95.9	-59.082							95.9	-66.0705						95.9	-57.2205
95.95	-59.2041							95.95	-65.918						95.95	-57.4951
96	-59.4788							96	-65.6433						96	-57.5256
96.05	-59.5093							96.05	-65.8569						96.05	-57.5561
96.1	-59.3872							96.1	-66.0705						96.1	-57.3425
96.15	-59.2957							96.15	-65.8874						96.15	-57.5867
96.2	-59.021							96.2	-65.7349						96.2	-57.4951
96.25	-59.2346							96.25	-66.1621						96.25	-57.373
96.3	-59.4177							96.3	-65.979						96.3	-57.4341
96.35	-59.4482							96.35	-65.7959						96.35	-57.5256
96.4	-59.4482							96.4	-65.8874						96.4	-57.5256
96.45	-59.3872							96.45	-66.1316						96.45	-57.2205
96.5	-59.1431							96.5	-65.8874						96.5	-57.4036
96.55	-59.082							96.55	-65.7043						96.55	-57.5256
96.6	-59.3567							96.6	-65.9485						96.6	-57.4646
96.65	-59.5398							96.65	-66.1316						96.65	-57.2205
96.7	-59.4482							96.7	-65.918						96.7	-57.4951
96.75	-59.4788							96.75	-65.5823						96.75	-57.4646
96.8	-59.4177							96.8	-65.979						96.8	-57.373
96.85	-59.2957							96.85	-66.0705						96.85	-57.1899
96.9	-59.082							96.9	-65.8264						96.9	-57.6172
96.95	-59.2957							96.95	-65.5518						96.95	-57.5256
97	-59.5398							97	-66.0095						97	-57.3425
97.05	-59.6008							97.05	-66.0095						97.05	-57.251
97.1	-59.4482							97.1	-65.8874						97.1	-57.6172
97.15	-59.4482							97.15	-65.5823						97.15	-57.5561
97.2	-59.3262							97.2	-65.918						97.2	-57.4036
97.25	-59.1736							97.25	-65.979						97.25	-57.2205
97.3	-59.1125							97.3	-65.8569						97.3	-57.5256
97.35	-59.3262							97.35	-65.5823						97.35	-57.4951
97.4	-59.4788							97.4	-65.7959						97.4	-57.3425
97.45	-59.4788							97.45	-66.0095						97.45	-57.1899
97.5	-59.4788							97.5	-65.9485						97.5	-57.4341
97.55	-59.4177							97.55	-65.7043						97.55	-57.4036
97.6	-59.2957							97.6	-65.7349						97.6	-57.4036
97.65	-59.2651							97.65	-66.0705						97.65	-57.1899
97.7	-59.1125							97.7	-65.918						97.7	-57.2815
97.75	-59.2346							97.75	-65.7349						97.75	-57.5256
97.8	-59.5398							97.8	-65.6433						97.8	-57.4036
97.85	-59.6313							97.85	-66.0705						97.85	-57.2815
97.9	-59.5398							97.9	-65.9485						97.9	-57.1289
97.95	-59.5093							97.95	-65.8874						97.95	-57.4951
98	-59.3567							98	-65.6433						98	-57.4951
98.05	-59.2651							98.05	-65.8874						98.05	-57.373
98.1	-59.5703							98.1	-66.1316						98.1	-57.1594
98.15	-59.5703							98.15	-66.0095						98.15	-57.373
98.2	-59.5398							98.2	-65.8874						98.2	-57.5256
98.25	-59.2651							98.25	-65.7654						98.25	-57.373
98.3	-59.3872							98.3	-66.0705						98.3	-57.2815
98.35	-59.6008							98.35	-66.0705						98.35	-57.1899
98.4	-59.4482							98.4	-65.979						98.4	-57.4646
98.45	-59.2346							98.45	-65.8874						98.45	-57.5256
98.5	-59.6313							98.5	-65.7349						98.5	-57.4951
98.55	-59.6008							98.55	-66.0705						98.55	-57.373
98.6	-59.1431							98.6	-66.1011						98.6	-57.2205
98.65	-59.6008							98.65	-66.04						98.65	-57.4646
98.7	-59.6008							98.7	-65.8569						98.7	-57.4951
98.75	-59.2346							98.75	-65.7349						98.75	-57.4951
98.8	-59.6924							98.8	-66.04						98.8	-57.3425
98.85	-59.3872							98.85	-66.1621						98.85	-57.0984
98.9	-59.3872							98.9	-66.0095						98.9	-57.4036
98.95	-59.7229							98.95	-65.918						98.95	-57.4951
99	-59.2957							99	-65.6128						99	-57.5561
99.05	-59.6008							99.05	-65.8264						99.05	-57.373
99.1	-59.6619							99.1	-66.1011						99.1	-57.1289
99.15	-59.3262							99.15	-66.0095						99.15	-57.2205
99.2	-59.7839							99.2	-65.8874						99.2	-57.6172
99.25	-59.5398							99.25	-65.6128						99.25	-57.4951
99.3	-59.4788							99.3	-65.8264						99.3	-57.4341
99.35	-59.7839							99.35	-66.04						99.35	-57.312
99.4	-59.2651							99.4	-66.0095						99.4	-57.251
99.45	-59.6313							99.45	-65.9485						99.45	-57.4646
99.5	-59.6619							99.5	-65.8569						99.5	-57.4951
99.55	-59.3872							99.55	-65.6128						99.55	-57.4341
99.6	-59.7839							99.6	-65.7959						99.6	-57.373
99.65	-59.6924							99.65	-65.918						99.65	-57.2205
99.7	-59.1736							99.7	-66.04						99.7	-57.1594
99.75	-59.6924							99.75	-65.9485						99.75	-57.373
99.8	-59.7229							99.8	-65.7959						99.8	-57.4951
99.85	-59.2651							99.85	-65.5518						99.85	-57.3425
99.9	-59.6619							99.9	-65.7654						99.9	-57.4646
[truncated: 63,536 more rows]

## Sheet: Fig. 1 suppl 7f
t(ms)	mp (mV)		Freq 1, 10, 100, 1000 Hz using 0.2 nA current injection									13830030		Freq 1, 10, 100, 1000 Hz using 0.2 nA current injection
0	-57.5256										0	-57.5256
0.05	-57.6172										0.05	-57.6172
0.1	-57.8613										0.1	-57.8613
0.15	-57.8308										0.15	-57.8308
0.2	-57.7698										0.2	-57.7698
0.25	-57.5867										0.25	-57.5867
0.3	-57.373										0.3	-57.373
0.35	-57.6782										0.35	-57.6782
0.4	-57.8308										0.4	-57.8308
0.45	-57.7698										0.45	-57.7698
0.5	-57.6782										0.5	-57.6782
0.55	-57.5561										0.55	-57.5561
0.6	-57.3425										0.6	-57.3425
0.65	-57.5561										0.65	-57.5561
0.7	-57.6782										0.7	-57.6782
0.75	-57.7393										0.75	-57.7393
0.8	-57.8308										0.8	-57.8308
0.85	-57.6477										0.85	-57.6477
0.9	-57.4951										0.9	-57.4951
0.95	-57.373										0.95	-57.373
1	-57.7393										1	-57.7393
1.05	-57.8918										1.05	-57.8918
1.1	-57.7393										1.1	-57.7393
1.15	-57.6782										1.15	-57.6782
1.2	-57.4341										1.2	-57.4341
1.25	-57.6782										1.25	-57.6782
1.3	-57.7698										1.3	-57.7698
1.35	-57.8613										1.35	-57.8613
1.4	-57.4646										1.4	-57.4646
1.45	-57.6172										1.45	-57.6172
1.5	-57.7393										1.5	-57.7393
1.55	-57.6782										1.55	-57.6782
1.6	-57.4951										1.6	-57.4951
1.65	-57.8308										1.65	-57.8308
1.7	-57.6782										1.7	-57.6782
1.75	-57.4646										1.75	-57.4646
1.8	-57.7698										1.8	-57.7698
1.85	-57.5256										1.85	-57.5256
1.9	-57.6477										1.9	-57.6477
1.95	-57.7393										1.95	-57.7393
2	-57.2815										2	-57.2815
2.05	-57.8308										2.05	-57.8308
2.1	-57.5561										2.1	-57.5561
2.15	-57.6782										2.15	-57.6782
2.2	-57.7393										2.2	-57.7393
2.25	-57.373										2.25	-57.373
2.3	-57.8613										2.3	-57.8613
2.35	-57.4951										2.35	-57.4951
2.4	-57.5867										2.4	-57.5867
2.45	-57.8308										2.45	-57.8308
2.5	-57.4951										2.5	-57.4951
2.55	-57.7698										2.55	-57.7698
2.6	-57.4646										2.6	-57.4646
2.65	-57.7393										2.65	-57.7393
2.7	-57.7698										2.7	-57.7698
2.75	-57.373										2.75	-57.373
2.8	-57.7698										2.8	-57.7698
2.85	-57.4646										2.85	-57.4646
2.9	-57.5256										2.9	-57.5256
2.95	-57.7087										2.95	-57.7087
3	-57.2815										3	-57.2815
3.05	-57.6172										3.05	-57.6172
3.1	-57.6477										3.1	-57.6477
3.15	-57.2205										3.15	-57.2205
3.2	-57.6172										3.2	-57.6172
3.25	-57.5867										3.25	-57.5867
3.3	-57.2815										3.3	-57.2815
3.35	-57.7087										3.35	-57.7087
3.4	-57.5867										3.4	-57.5867
3.45	-57.251										3.45	-57.251
3.5	-57.7698										3.5	-57.7698
3.55	-57.7087										3.55	-57.7087
3.6	-57.2205										3.6	-57.2205
3.65	-57.8003										3.65	-57.8003
3.7	-57.6477										3.7	-57.6477
3.75	-57.251										3.75	-57.251
3.8	-57.6172										3.8	-57.6172
3.85	-57.7087										3.85	-57.7087
3.9	-57.373										3.9	-57.373
3.95	-57.5867										3.95	-57.5867
4	-57.6477										4	-57.6477
4.05	-57.4036										4.05	-57.4036
4.1	-57.4036										4.1	-57.4036
4.15	-57.7698										4.15	-57.7698
4.2	-57.4951										4.2	-57.4951
4.25	-57.2815										4.25	-57.2815
4.3	-57.6477										4.3	-57.6477
4.35	-57.6172										4.35	-57.6172
4.4	-57.1899										4.4	-57.1899
4.45	-57.4951										4.45	-57.4951
4.5	-57.5561										4.5	-57.5561
4.55	-57.4646										4.55	-57.4646
4.6	-57.3425										4.6	-57.3425
4.65	-57.6782										4.65	-57.6782
4.7	-57.5561										4.7	-57.5561
4.75	-57.3425										4.75	-57.3425
4.8	-57.6477										4.8	-57.6477
4.85	-57.6172										4.85	-57.6172
4.9	-57.373										4.9	-57.373
4.95	-57.4036										4.95	-57.4036
5	-57.7087										5	-57.7087
5.05	-57.4951										5.05	-57.4951
5.1	-57.2205										5.1	-57.2205
5.15	-57.4951										5.15	-57.4951
5.2	-57.6172										5.2	-57.6172
5.25	-57.3425										5.25	-57.3425
5.3	-57.1899										5.3	-57.1899
5.35	-57.5867										5.35	-57.5867
5.4	-57.5867										5.4	-57.5867
5.45	-57.312										5.45	-57.312
5.5	-57.2815										5.5	-57.2815
5.55	-57.5561										5.55	-57.5561
5.6	-57.6172										5.6	-57.6172
5.65	-57.2205										5.65	-57.2205
5.7	-57.4036										5.7	-57.4036
5.75	-57.6172										5.75	-57.6172
5.8	-57.6477										5.8	-57.6477
5.85	-57.2815										5.85	-57.2815
5.9	-57.4646										5.9	-57.4646
5.95	-57.6172										5.95	-57.6172
6	-57.7087										6	-57.7087
6.05	-57.312										6.05	-57.312
6.1	-57.4646										6.1	-57.4646
6.15	-57.6782										6.15	-57.6782
6.2	-57.6172										6.2	-57.6172
6.25	-57.312										6.25	-57.312
6.3	-57.4341										6.3	-57.4341
6.35	-57.7087										6.35	-57.7087
6.4	-57.6477										6.4	-57.6477
6.45	-57.4036										6.45	-57.4036
6.5	-57.312										6.5	-57.312
6.55	-57.5561										6.55	-57.5561
6.6	-57.4951										6.6	-57.4951
6.65	-57.4341										6.65	-57.4341
6.7	-57.2205										6.7	-57.2205
6.75	-57.4341										6.75	-57.4341
6.8	-57.5561										6.8	-57.5561
6.85	-57.5256										6.85	-57.5256
6.9	-57.1899										6.9	-57.1899
6.95	-57.2815										6.95	-57.2815
7	-57.5867										7	-57.5867
7.05	-57.6172										7.05	-57.6172
7.1	-57.4341										7.1	-57.4341
7.15	-57.1289										7.15	-57.1289
7.2	-57.373										7.2	-57.373
7.25	-57.6477										7.25	-57.6477
7.3	-57.5867										7.3	-57.5867
7.35	-57.373										7.35	-57.373
7.4	-57.1899										7.4	-57.1899
7.45	-57.4951										7.45	-57.4951
7.5	-57.6172										7.5	-57.6172
7.55	-57.5561										7.55	-57.5561
7.6	-57.3425										7.6	-57.3425
7.65	-57.1899										7.65	-57.1899
7.7	-57.4341										7.7	-57.4341
7.75	-57.5867										7.75	-57.5867
7.8	-57.4951										7.8	-57.4951
7.85	-57.3425										7.85	-57.3425
7.9	-57.0984										7.9	-57.0984
7.95	-57.373										7.95	-57.373
8	-57.5561										8	-57.5561
8.05	-57.373										8.05	-57.373
8.1	-57.4646										8.1	-57.4646
8.15	-57.1594										8.15	-57.1594
8.2	-57.1289										8.2	-57.1289
8.25	-57.4036										8.25	-57.4036
8.3	-57.5561										8.3	-57.5561
8.35	-57.5256										8.35	-57.5256
8.4	-57.3425										8.4	-57.3425
8.45	-57.1289										8.45	-57.1289
8.5	-57.3425										8.5	-57.3425
8.55	-57.5867										8.55	-57.5867
8.6	-57.5561										8.6	-57.5561
8.65	-57.4951										8.65	-57.4951
8.7	-57.312										8.7	-57.312
8.75	-57.2205										8.75	-57.2205
8.8	-57.1899										8.8	-57.1899
8.85	-57.4341										8.85	-57.4341
8.9	-57.5561										8.9	-57.5561
8.95	-57.373										8.95	-57.373
9	-57.3425										9	-57.3425
9.05	-57.1594										9.05	-57.1594
9.1	-57.0679										9.1	-57.0679
9.15	-57.312										9.15	-57.312
9.2	-57.4341										9.2	-57.4341
9.25	-57.312										9.25	-57.312
9.3	-57.4036										9.3	-57.4036
9.35	-57.1289										9.35	-57.1289
9.4	-57.0068										9.4	-57.0068
9.45	-57.1899										9.45	-57.1899
9.5	-57.373										9.5	-57.373
9.55	-57.3425										9.55	-57.3425
9.6	-57.1289										9.6	-57.1289
9.65	-56.9763										9.65	-56.9763
9.7	-57.312										9.7	-57.312
9.75	-57.4341										9.75	-57.4341
9.8	-57.1594										9.8	-57.1594
9.85	-57.1594										9.85	-57.1594
9.9	-57.373										9.9	-57.373
9.95	-57.2205										9.95	-57.2205
10	-57.2205										10	-57.2205
10.05	-57.373										10.05	-57.373
10.1	-57.1899										10.1	-57.1899
10.15	-57.1899										10.15	-57.1899
10.2	-57.4951										10.2	-57.4951
10.25	-56.9458										10.25	-56.9458
10.3	-57.373										10.3	-57.373
10.35	-57.2205										10.35	-57.2205
10.4	-57.1289										10.4	-57.1289
10.45	-57.373										10.45	-57.373
10.5	-56.9458										10.5	-56.9458
10.55	-57.373										10.55	-57.373
10.6	-57.1899										10.6	-57.1899
10.65	-57.2815										10.65	-57.2815
10.7	-57.4036										10.7	-57.4036
10.75	-56.8848										10.75	-56.8848
10.8	-57.4951										10.8	-57.4951
10.85	-57.1594										10.85	-57.1594
10.9	-57.4341										10.9	-57.4341
10.95	-57.373										10.95	-57.373
11	-57.1594										11	-57.1594
11.05	-57.4951										11.05	-57.4951
11.1	-57.2205										11.1	-57.2205
11.15	-57.373										11.15	-57.373
11.2	-57.4646										11.2	-57.4646
11.25	-57.0984										11.25	-57.0984
11.3	-57.4341										11.3	-57.4341
11.35	-57.4341										11.35	-57.4341
11.4	-57.1594										11.4	-57.1594
11.45	-57.5561										11.45	-57.5561
11.5	-57.3425										11.5	-57.3425
11.55	-57.1899										11.55	-57.1899
11.6	-57.5867										11.6	-57.5867
11.65	-57.2205										11.65	-57.2205
11.7	-57.3425										11.7	-57.3425
11.75	-57.4341										11.75	-57.4341
11.8	-57.2205										11.8	-57.2205
11.85	-57.312										11.85	-57.312
11.9	-57.5256										11.9	-57.5256
11.95	-57.3425										11.95	-57.3425
12	-57.1899										12	-57.1899
12.05	-57.5256										12.05	-57.5256
12.1	-57.3425										12.1	-57.3425
12.15	-57.2205										12.15	-57.2205
12.2	-57.5256										12.2	-57.5256
12.25	-57.4646										12.25	-57.4646
12.3	-57.2205										12.3	-57.2205
12.35	-57.5867										12.35	-57.5867
12.4	-57.5256										12.4	-57.5256
12.45	-57.0984										12.45	-57.0984
12.5	-57.5256										12.5	-57.5256
12.55	-57.5561										12.55	-57.5561
12.6	-57.251										12.6	-57.251
12.65	-57.4646										12.65	-57.4646
12.7	-57.4036										12.7	-57.4036
12.75	-57.251										12.75	-57.251
12.8	-57.1594										12.8	-57.1594
12.85	-57.5256										12.85	-57.5256
12.9	-57.4341										12.9	-57.4341
12.95	-57.0984										12.95	-57.0984
13	-57.4646										13	-57.4646
13.05	-57.4036										13.05	-57.4036
13.1	-57.2205										13.1	-57.2205
13.15	-57.2815										13.15	-57.2815
13.2	-57.4951										13.2	-57.4951
13.25	-57.312										13.25	-57.312
13.3	-57.1289										13.3	-57.1289
13.35	-57.4951										13.35	-57.4951
13.4	-57.4646										13.4	-57.4646
13.45	-57.2205										13.45	-57.2205
13.5	-57.312										13.5	-57.312
13.55	-57.5256										13.55	-57.5256
13.6	-57.4341										13.6	-57.4341
13.65	-57.1289										13.65	-57.1289
13.7	-57.4646										13.7	-57.4646
13.75	-57.5561										13.75	-57.5561
13.8	-57.312										13.8	-57.312
13.85	-57.0984										13.85	-57.0984
13.9	-57.4646										13.9	-57.4646
13.95	-57.4951										13.95	-57.4951
14	-57.1594										14	-57.1594
14.05	-57.1899										14.05	-57.1899
14.1	-57.4646										14.1	-57.4646
14.15	-57.4341										14.15	-57.4341
14.2	-57.1594										14.2	-57.1594
14.25	-57.2205										14.25	-57.2205
14.3	-57.5256										14.3	-57.5256
14.35	-57.4646										14.35	-57.4646
14.4	-57.251										14.4	-57.251
14.45	-57.251										14.45	-57.251
14.5	-57.5867										14.5	-57.5867
14.55	-57.5561										14.55	-57.5561
14.6	-57.312										14.6	-57.312
14.65	-57.251										14.65	-57.251
14.7	-57.6172										14.7	-57.6172
14.75	-57.5867										14.75	-57.5867
14.8	-57.4341										14.8	-57.4341
14.85	-57.2205										14.85	-57.2205
14.9	-57.5867										14.9	-57.5867
14.95	-57.6172										14.95	-57.6172
15	-57.6477										15	-57.6477
15.05	-57.1289										15.05	-57.1289
15.1	-57.5561										15.1	-57.5561
15.15	-57.6477										15.15	-57.6477
15.2	-57.5561										15.2	-57.5561
15.25	-57.312										15.25	-57.312
15.3	-57.251										15.3	-57.251
15.35	-57.5867										15.35	-57.5867
15.4	-57.6477										15.4	-57.6477
15.45	-57.4951										15.45	-57.4951
15.5	-57.1289										15.5	-57.1289
15.55	-57.373										15.55	-57.373
15.6	-57.6782										15.6	-57.6782
15.65	-57.5561										15.65	-57.5561
15.7	-57.373										15.7	-57.373
15.75	-57.2205										15.75	-57.2205
15.8	-57.6172										15.8	-57.6172
15.85	-57.6477										15.85	-57.6477
15.9	-57.5256										15.9	-57.5256
15.95	-57.3425										15.95	-57.3425
16	-57.312										16	-57.312
16.05	-57.5561										16.05	-57.5561
16.1	-57.6172										16.1	-57.6172
16.15	-57.5867										16.15	-57.5867
16.2	-57.4646										16.2	-57.4646
16.25	-57.2815										16.25	-57.2815
16.3	-57.5256										16.3	-57.5256
16.35	-57.6782										16.35	-57.6782
16.4	-57.6172										16.4	-57.6172
16.45	-57.4341										16.45	-57.4341
16.5	-57.2815										16.5	-57.2815
16.55	-57.4341										16.55	-57.4341
16.6	-57.6477										16.6	-57.6477
16.65	-57.6172										16.65	-57.6172
16.7	-57.6172										16.7	-57.6172
16.75	-57.373										16.75	-57.373
16.8	-57.2205										16.8	-57.2205
16.85	-57.6477										16.85	-57.6477
16.9	-57.7393										16.9	-57.7393
16.95	-57.6172										16.95	-57.6172
17	-57.5867										17	-57.5867
17.05	-57.4646										17.05	-57.4646
17.1	-57.2815										17.1	-57.2815
17.15	-57.5256										17.15	-57.5256
17.2	-57.7087										17.2	-57.7087
17.25	-57.6782										17.25	-57.6782
17.3	-57.6782										17.3	-57.6782
17.35	-57.4341										17.35	-57.4341
17.4	-57.2815										17.4	-57.2815
17.45	-57.4951										17.45	-57.4951
17.5	-57.6782										17.5	-57.6782
17.55	-57.7393										17.55	-57.7393
17.6	-57.7087										17.6	-57.7087
17.65	-57.5867										17.65	-57.5867
17.7	-57.4341										17.7	-57.4341
17.75	-57.4036										17.75	-57.4036
17.8	-57.6477										17.8	-57.6477
17.85	-57.6172										17.85	-57.6172
17.9	-57.5561										17.9	-57.5561
17.95	-57.4341										17.95	-57.4341
18	-57.373										18	-57.373
18.05	-57.7087										18.05	-57.7087
18.1	-57.6477										18.1	-57.6477
18.15	-57.312										18.15	-57.312
18.2	-57.5561										18.2	-57.5561
18.25	-57.6782										18.25	-57.6782
18.3	-57.4646										18.3	-57.4646
18.35	-57.5867										18.35	-57.5867
18.4	-57.6477										18.4	-57.6477
18.45	-57.2815										18.45	-57.2815
18.5	-57.7393										18.5	-57.7393
18.55	-57.7393										18.55	-57.7393
18.6	-57.3425										18.6	-57.3425
18.65	-57.8308										18.65	-57.8308
18.7	-57.5561										18.7	-57.5561
18.75	-57.6172										18.75	-57.6172
18.8	-57.7087										18.8	-57.7087
18.85	-57.312										18.85	-57.312
18.9	-57.7087										18.9	-57.7087
18.95	-57.3425										18.95	-57.3425
19	-57.7698										19	-57.7698
19.05	-57.5867										19.05	-57.5867
19.1	-57.4341										19.1	-57.4341
19.15	-57.6782										19.15	-57.6782
19.2	-57.3425										19.2	-57.3425
19.25	-57.7393										19.25	-57.7393
19.3	-57.5256										19.3	-57.5256
19.35	-57.5561										19.35	-57.5561
19.4	-57.7393										19.4	-57.7393
19.45	-57.3425										19.45	-57.3425
19.5	-57.7393										19.5	-57.7393
19.55	-57.7087										19.55	-57.7087
19.6	-57.4646										19.6	-57.4646
19.65	-57.7393										19.65	-57.7393
19.7	-57.5561										19.7	-57.5561
19.75	-57.5867										19.75	-57.5867
19.8	-57.7698										19.8	-57.7698
19.85	-57.312										19.85	-57.312
19.9	-57.5867										19.9	-57.5867
19.95	-57.7698										19.95	-57.7698
20	-57.312										20	-57.312
20.05	-57.6172										20.05	-57.6172
20.1	-57.5867										20.1	-57.5867
20.15	-57.3425										20.15	-57.3425
20.2	-57.5867										20.2	-57.5867
20.25	-57.6782										20.25	-57.6782
20.3	-57.1899										20.3	-57.1899
20.35	-57.5867										20.35	-57.5867
20.4	-57.6477										20.4	-57.6477
20.45	-57.2815										20.45	-57.2815
20.5	-57.4951										20.5	-57.4951
20.55	-57.5867										20.55	-57.5867
20.6	-57.4036										20.6	-57.4036
20.65	-57.4341										20.65	-57.4341
20.7	-57.6172										20.7	-57.6172
20.75	-57.4646										20.75	-57.4646
20.8	-57.373										20.8	-57.373
20.85	-57.7698										20.85	-57.7698
20.9	-57.5256										20.9	-57.5256
20.95	-57.251										20.95	-57.251
21	-57.7087										21	-57.7087
21.05	-57.6782										21.05	-57.6782
21.1	-57.2815										21.1	-57.2815
21.15	-57.5561										21.15	-57.5561
21.2	-57.6172										21.2	-57.6172
21.25	-57.4951										21.25	-57.4951
21.3	-57.373										21.3	-57.373
21.35	-57.6782										21.35	-57.6782
21.4	-57.5561										21.4	-57.5561
21.45	-57.1289										21.45	-57.1289
21.5	-57.6172										21.5	-57.6172
21.55	-57.5561										21.55	-57.5561
21.6	-57.312										21.6	-57.312
21.65	-57.4341										21.65	-57.4341
21.7	-57.6172										21.7	-57.6172
21.75	-57.4951										21.75	-57.4951
21.8	-57.1289										21.8	-57.1289
21.85	-57.5867										21.85	-57.5867
21.9	-57.5867										21.9	-57.5867
21.95	-57.4951										21.95	-57.4951
22	-57.251										22	-57.251
22.05	-57.7393										22.05	-57.7393
22.1	-57.6477										22.1	-57.6477
22.15	-57.4036										22.15	-57.4036
22.2	-57.4341										22.2	-57.4341
22.25	-57.7393										22.25	-57.7393
22.3	-57.6782										22.3	-57.6782
22.35	-57.1899										22.35	-57.1899
22.4	-57.5867										22.4	-57.5867
22.45	-57.7393										22.45	-57.7393
22.5	-57.5867										22.5	-57.5867
22.55	-57.251										22.55	-57.251
22.6	-57.5561										22.6	-57.5561
22.65	-57.7087										22.65	-57.7087
22.7	-57.4951										22.7	-57.4951
22.75	-57.2205										22.75	-57.2205
22.8	-57.5561										22.8	-57.5561
22.85	-57.5867										22.85	-57.5867
22.9	-57.4951										22.9	-57.4951
22.95	-57.1899										22.95	-57.1899
23	-57.5561										23	-57.5561
23.05	-57.5256										23.05	-57.5256
23.1	-57.5867										23.1	-57.5867
23.15	-57.2205										23.15	-57.2205
23.2	-57.4646										23.2	-57.4646
23.25	-57.7087										23.25	-57.7087
23.3	-57.6782										23.3	-57.6782
23.35	-57.4036										23.35	-57.4036
23.4	-57.4036										23.4	-57.4036
23.45	-57.7087										23.45	-57.7087
23.5	-57.7087										23.5	-57.7087
23.55	-57.4951										23.55	-57.4951
23.6	-57.1899										23.6	-57.1899
23.65	-57.5561										23.65	-57.5561
23.7	-57.7087										23.7	-57.7087
23.75	-57.5561										23.75	-57.5561
23.8	-57.251										23.8	-57.251
23.85	-57.312										23.85	-57.312
23.9	-57.6477										23.9	-57.6477
23.95	-57.4951										23.95	-57.4951
24	-57.4646										24	-57.4646
24.05	-57.0984										24.05	-57.0984
24.1	-57.2815										24.1	-57.2815
24.15	-57.5867										24.15	-57.5867
24.2	-57.4951										24.2	-57.4951
24.25	-57.4036										24.25	-57.4036
24.3	-57.0984										24.3	-57.0984
24.35	-57.4341										24.35	-57.4341
24.4	-57.5561										24.4	-57.5561
24.45	-57.4951										24.45	-57.4951
24.5	-57.373										24.5	-57.373
24.55	-57.1899										24.55	-57.1899
24.6	-57.373										24.6	-57.373
24.65	-57.6477										24.65	-57.6477
24.7	-57.5867										24.7	-57.5867
24.75	-57.4951										24.75	-57.4951
24.8	-57.312										24.8	-57.312
24.85	-57.2815										24.85	-57.2815
24.9	-57.5867										24.9	-57.5867
24.95	-57.6477										24.95	-57.6477
25	-57.6172										25	-57.6172
25.05	-57.3425										25.05	-57.3425
25.1	-57.2205										25.1	-57.2205
25.15	-57.4646										25.15	-57.4646
25.2	-57.6782										25.2	-57.6782
25.25	-57.7087										25.25	-57.7087
25.3	-57.6172										25.3	-57.6172
25.35	-57.4341										25.35	-57.4341
25.4	-57.3425										25.4	-57.3425
25.45	-57.6172										25.45	-57.6172
25.5	-57.7087										25.5	-57.7087
25.55	-57.7087										25.55	-57.7087
25.6	-57.7393										25.6	-57.7393
25.65	-57.5561										25.65	-57.5561
25.7	-57.4646										25.7	-57.4646
25.75	-57.5561										25.75	-57.5561
25.8	-57.8613										25.8	-57.8613
25.85	-57.8308										25.85	-57.8308
25.9	-57.7698										25.9	-57.7698
25.95	-57.7087										25.95	-57.7087
26	-57.4951										26	-57.4951
26.05	-57.6172										26.05	-57.6172
26.1	-57.7698										26.1	-57.7698
26.15	-57.8308										26.15	-57.8308
26.2	-57.8003										26.2	-57.8003
26.25	-57.5561										26.25	-57.5561
26.3	-57.5867										26.3	-57.5867
26.35	-57.8308										26.35	-57.8308
26.4	-57.7393										26.4	-57.7393
26.45	-57.4036										26.45	-57.4036
26.5	-57.6172										26.5	-57.6172
26.55	-57.7393										26.55	-57.7393
26.6	-57.4951										26.6	-57.4951
26.65	-57.6782										26.65	-57.6782
26.7	-57.7698										26.7	-57.7698
26.75	-57.3425										26.75	-57.3425
26.8	-57.7087										26.8	-57.7087
26.85	-57.8308										26.85	-57.8308
26.9	-57.4036										26.9	-57.4036
26.95	-57.8308										26.95	-57.8308
27	-57.6477										27	-57.6477
27.05	-57.7393										27.05	-57.7393
27.1	-57.8613										27.1	-57.8613
27.15	-57.4036										27.15	-57.4036
27.2	-57.9224										27.2	-57.9224
27.25	-57.7087										27.25	-57.7087
27.3	-57.8613										27.3	-57.8613
27.35	-57.8613										27.35	-57.8613
27.4	-57.6172										27.4	-57.6172
27.45	-57.9529										27.45	-57.9529
27.5	-57.5867										27.5	-57.5867
27.55	-57.9834										27.55	-57.9834
27.6	-57.7698										27.6	-57.7698
27.65	-57.6172										27.65	-57.6172
27.7	-57.8918										27.7	-57.8918
27.75	-57.4951										27.75	-57.4951
27.8	-57.8613										27.8	-57.8613
27.85	-57.8003										27.85	-57.8003
27.9	-57.6477										27.9	-57.6477
27.95	-57.9529										27.95	-57.9529
28	-57.7393										28	-57.7393
28.05	-57.7698										28.05	-57.7698
28.1	-58.0444										28.1	-58.0444
28.15	-57.5256										28.15	-57.5256
28.2	-57.9834										28.2	-57.9834
28.25	-57.9529										28.25	-57.9529
28.3	-57.5561										28.3	-57.5561
28.35	-58.0749										28.35	-58.0749
28.4	-57.9529										28.4	-57.9529
28.45	-57.5867										28.45	-57.5867
28.5	-58.1055										28.5	-58.1055
28.55	-58.136										28.55	-58.136
28.6	-57.5561										28.6	-57.5561
28.65	-57.9834										28.65	-57.9834
28.7	-57.9529										28.7	-57.9529
28.75	-57.5561										28.75	-57.5561
28.8	-57.9834										28.8	-57.9834
28.85	-57.9834										28.85	-57.9834
28.9	-57.6172										28.9	-57.6172
28.95	-57.9224										28.95	-57.9224
29	-57.9834										29	-57.9834
29.05	-57.6172										29.05	-57.6172
29.1	-57.8918										29.1	-57.8918
29.15	-57.9224										29.15	-57.9224
29.2	-57.7698										29.2	-57.7698
29.25	-57.8003										29.25	-57.8003
29.3	-58.0444										29.3	-58.0444
29.35	-57.8613										29.35	-57.8613
29.4	-57.7393										29.4	-57.7393
29.45	-58.1055										29.45	-58.1055
29.5	-58.0444										29.5	-58.0444
29.55	-57.6782										29.55	-57.6782
29.6	-58.136										29.6	-58.136
29.65	-58.136										29.65	-58.136
29.7	-57.8308										29.7	-57.8308
29.75	-58.0444										29.75	-58.0444
29.8	-58.2275										29.8	-58.2275
29.85	-58.0139										29.85	-58.0139
29.9	-57.7698										29.9	-57.7698
29.95	-58.197										29.95	-58.197
30	-58.1665										30	-58.1665
30.05	-57.8613										30.05	-57.8613
30.1	-57.9834										30.1	-57.9834
30.15	-58.1055										30.15	-58.1055
30.2	-58.0444										30.2	-58.0444
30.25	-57.8003										30.25	-57.8003
30.3	-58.136										30.3	-58.136
30.35	-58.136										30.35	-58.136
30.4	-57.9834										30.4	-57.9834
30.45	-57.9224										30.45	-57.9224
30.5	-58.197										30.5	-58.197
30.55	-58.0749										30.55	-58.0749
30.6	-57.7698										30.6	-57.7698
30.65	-58.136										30.65	-58.136
30.7	-58.197										30.7	-58.197
30.75	-58.136										30.75	-58.136
30.8	-57.8918										30.8	-57.8918
30.85	-58.2886										30.85	-58.2886
30.9	-58.1665										30.9	-58.1665
30.95	-58.0749										30.95	-58.0749
31	-57.8003										31	-57.8003
31.05	-58.2581										31.05	-58.2581
31.1	-58.2275										31.1	-58.2275
31.15	-58.0444										31.15	-58.0444
31.2	-57.8613										31.2	-57.8613
31.25	-58.197										31.25	-58.197
31.3	-58.197										31.3	-58.197
31.35	-58.0444										31.35	-58.0444
31.4	-57.7087										31.4	-57.7087
31.45	-58.197										31.45	-58.197
31.5	-58.197										31.5	-58.197
31.55	-58.0444										31.55	-58.0444
31.6	-57.7087										31.6	-57.7087
31.65	-58.1055										31.65	-58.1055
31.7	-58.136										31.7	-58.136
31.75	-58.136										31.75	-58.136
31.8	-57.7698										31.8	-57.7698
31.85	-58.0749										31.85	-58.0749
31.9	-58.3496										31.9	-58.3496
31.95	-58.2581										31.95	-58.2581
32	-58.0444										32	-58.0444
32.05	-57.9224										32.05	-57.9224
32.1	-58.2886										32.1	-58.2886
32.15	-58.2275										32.15	-58.2275
32.2	-58.1055										32.2	-58.1055
32.25	-58.0139										32.25	-58.0139
32.3	-58.136										32.3	-58.136
32.35	-58.2886										32.35	-58.2886
32.4	-58.2275										32.4	-58.2275
32.45	-58.0444										32.45	-58.0444
32.5	-57.9224										32.5	-57.9224
32.55	-58.2886										32.55	-58.2886
32.6	-58.3496										32.6	-58.3496
32.65	-58.2581										32.65	-58.2581
32.7	-58.0749										32.7	-58.0749
32.75	-58.0444										32.75	-58.0444
32.8	-58.2275										32.8	-58.2275
32.85	-58.4412										32.85	-58.4412
32.9	-58.3496										32.9	-58.3496
32.95	-58.136										32.95	-58.136
33	-57.9834										33	-57.9834
33.05	-58.2886										33.05	-58.2886
33.1	-58.5327										33.1	-58.5327
33.15	-58.4412										33.15	-58.4412
33.2	-58.2581										33.2	-58.2581
33.25	-58.0139										33.25	-58.0139
33.3	-58.2886										33.3	-58.2886
33.35	-58.5632										33.35	-58.5632
33.4	-58.4106										33.4	-58.4106
33.45	-58.3496										33.45	-58.3496
33.5	-58.197										33.5	-58.197
33.55	-58.1055										33.55	-58.1055
33.6	-58.3801										33.6	-58.3801
33.65	-58.4106										33.65	-58.4106
33.7	-58.3801										33.7	-58.3801
33.75	-58.2581										33.75	-58.2581
33.8	-58.136										33.8	-58.136
33.85	-58.0444										33.85	-58.0444
33.9	-58.3191										33.9	-58.3191
33.95	-58.4717										33.95	-58.4717
34	-58.3191										34	-58.3191
34.05	-58.3496										34.05	-58.3496
34.1	-58.136										34.1	-58.136
34.15	-58.136										34.15	-58.136
34.2	-58.2581										34.2	-58.2581
34.25	-58.4412										34.25	-58.4412
34.3	-58.4717										34.3	-58.4717
34.35	-58.4717										34.35	-58.4717
34.4	-58.3496										34.4	-58.3496
34.45	-58.0139										34.45	-58.0139
34.5	-58.4412										34.5	-58.4412
34.55	-58.5327										34.55	-58.5327
34.6	-58.5022										34.6	-58.5022
34.65	-58.1665										34.65	-58.1665
34.7	-58.2886										34.7	-58.2886
34.75	-58.6243										34.75	-58.6243
34.8	-58.5022										34.8	-58.5022
34.85	-58.0749										34.85	-58.0749
34.9	-58.5937										34.9	-58.5937
34.95	-58.5022										34.95	-58.5022
35	-58.1665										35	-58.1665
35.05	-58.5632										35.05	-58.5632
35.1	-58.5327										35.1	-58.5327
35.15	-58.1665										35.15	-58.1665
35.2	-58.6548										35.2	-58.6548
35.25	-58.3496										35.25	-58.3496
35.3	-58.3191										35.3	-58.3191
35.35	-58.4412										35.35	-58.4412
35.4	-58.136										35.4	-58.136
35.45	-58.5632										35.45	-58.5632
35.5	-58.3801										35.5	-58.3801
35.55	-58.3801										35.55	-58.3801
35.6	-58.5937										35.6	-58.5937
35.65	-58.197										35.65	-58.197
35.7	-58.6548										35.7	-58.6548
35.75	-58.3191										35.75	-58.3191
35.8	-58.6243										35.8	-58.6243
35.85	-58.6243										35.85	-58.6243
35.9	-58.2886										35.9	-58.2886
35.95	-58.6548										35.95	-58.6548
36	-58.3191										36	-58.3191
36.05	-58.7463										36.05	-58.7463
36.1	-58.5632										36.1	-58.5632
36.15	-58.3496										36.15	-58.3496
36.2	-58.6548										36.2	-58.6548
36.25	-58.4106										36.25	-58.4106
36.3	-58.6548										36.3	-58.6548
36.35	-58.6243										36.35	-58.6243
36.4	-58.197										36.4	-58.197
36.45	-58.6548										36.45	-58.6548
36.5	-58.6243										36.5	-58.6243
36.55	-58.3191										36.55	-58.3191
36.6	-58.7463										36.6	-58.7463
36.65	-58.6548										36.65	-58.6548
36.7	-58.4106										36.7	-58.4106
36.75	-58.8074										36.75	-58.8074
36.8	-58.5022										36.8	-58.5022
36.85	-58.5022										36.85	-58.5022
36.9	-58.7769										36.9	-58.7769
36.95	-58.5937										36.95	-58.5937
37	-58.5022										37	-58.5022
37.05	-58.8989										37.05	-58.8989
37.1	-58.7158										37.1	-58.7158
37.15	-58.4717										37.15	-58.4717
37.2	-58.8684										37.2	-58.8684
37.25	-58.7769										37.25	-58.7769
37.3	-58.5327										37.3	-58.5327
37.35	-58.7769										37.35	-58.7769
37.4	-58.7769										37.4	-58.7769
37.45	-58.4106										37.45	-58.4106
37.5	-58.8684										37.5	-58.8684
37.55	-58.8074										37.55	-58.8074
37.6	-58.4106										37.6	-58.4106
37.65	-58.6548										37.65	-58.6548
37.7	-58.7158										37.7	-58.7158
37.75	-58.6243										37.75	-58.6243
37.8	-58.5327										37.8	-58.5327
37.85	-58.7463										37.85	-58.7463
37.9	-58.7463										37.9	-58.7463
37.95	-58.4412										37.95	-58.4412
38	-58.8074										38	-58.8074
38.05	-58.7769										38.05	-58.7769
38.1	-58.5327										38.1	-58.5327
38.15	-58.7769										38.15	-58.7769
38.2	-58.8379										38.2	-58.8379
38.25	-58.6548										38.25	-58.6548
38.3	-58.6853										38.3	-58.6853
38.35	-59.0515										38.35	-59.0515
38.4	-58.8379										38.4	-58.8379
38.45	-58.5022										38.45	-58.5022
38.5	-58.8379										38.5	-58.8379
38.55	-58.9294										38.55	-58.9294
38.6	-58.7158										38.6	-58.7158
38.65	-58.5327										38.65	-58.5327
38.7	-58.9905										38.7	-58.9905
38.75	-58.8074										38.75	-58.8074
38.8	-58.5937										38.8	-58.5937
38.85	-58.6243										38.85	-58.6243
38.9	-58.8379										38.9	-58.8379
38.95	-58.7463										38.95	-58.7463
39	-58.4717										39	-58.4717
39.05	-58.8074										39.05	-58.8074
39.1	-58.8379										39.1	-58.8379
39.15	-58.8074										39.15	-58.8074
39.2	-58.4717										39.2	-58.4717
39.25	-58.8684										39.25	-58.8684
39.3	-58.8379										39.3	-58.8379
39.35	-58.7769										39.35	-58.7769
39.4	-58.5022										39.4	-58.5022
39.45	-58.8684										39.45	-58.8684
39.5	-58.8379										39.5	-58.8379
39.55	-58.6243										39.55	-58.6243
39.6	-58.5327										39.6	-58.5327
39.65	-58.7463										39.65	-58.7463
39.7	-58.7769										39.7	-58.7769
39.75	-58.7158										39.75	-58.7158
39.8	-58.4412										39.8	-58.4412
39.85	-58.8074										39.85	-58.8074
39.9	-58.7463										39.9	-58.7463
39.95	-58.6853										39.95	-58.6853
40	-58.3191										40	-58.3191
40.05	-58.6853										40.05	-58.6853
40.1	-58.7463										40.1	-58.7463
40.15	-58.6853										40.15	-58.6853
40.2	-58.3801										40.2	-58.3801
40.25	-58.5022										40.25	-58.5022
40.3	-58.7769										40.3	-58.7769
40.35	-58.7769										40.35	-58.7769
40.4	-58.6243										40.4	-58.6243
40.45	-58.4412										40.45	-58.4412
40.5	-58.7463										40.5	-58.7463
40.55	-58.7158										40.55	-58.7158
40.6	-58.8074										40.6	-58.8074
40.65	-58.4412										40.65	-58.4412
40.7	-58.5327										40.7	-58.5327
40.75	-58.8074										40.75	-58.8074
40.8	-58.8989										40.8	-58.8989
40.85	-58.6853										40.85	-58.6853
40.9	-58.4106										40.9	-58.4106
40.95	-58.6548										40.95	-58.6548
41	-58.8684										41	-58.8684
41.05	-58.8379										41.05	-58.8379
41.1	-58.6548										41.1	-58.6548
41.15	-58.4412										41.15	-58.4412
41.2	-58.6243										41.2	-58.6243
41.25	-58.8684										41.25	-58.8684
41.3	-58.8379										41.3	-58.8379
41.35	-58.6853										41.35	-58.6853
41.4	-58.4412										41.4	-58.4412
41.45	-58.6243										41.45	-58.6243
41.5	-58.8989										41.5	-58.8989
41.55	-58.8074										41.55	-58.8074
41.6	-58.8074										41.6	-58.8074
41.65	-58.7158										41.65	-58.7158
41.7	-58.5937										41.7	-58.5937
41.75	-58.8379										41.75	-58.8379
41.8	-58.96										41.8	-58.96
41.85	-58.9294										41.85	-58.9294
41.9	-58.8074										41.9	-58.8074
41.95	-58.5632										41.95	-58.5632
42	-58.6853										42	-58.6853
42.05	-58.96										42.05	-58.96
42.1	-59.082										42.1	-59.082
42.15	-58.8989										42.15	-58.8989
42.2	-58.6853										42.2	-58.6853
42.25	-58.5632										42.25	-58.5632
42.3	-58.6243										42.3	-58.6243
42.35	-58.8989										42.35	-58.8989
42.4	-58.96										42.4	-58.96
42.45	-58.8379										42.45	-58.8379
42.5	-58.7463										42.5	-58.7463
42.55	-58.5937										42.55	-58.5937
42.6	-58.5632										42.6	-58.5632
42.65	-58.7463										42.65	-58.7463
42.7	-58.96										42.7	-58.96
42.75	-58.8684										42.75	-58.8684
42.8	-58.7463										42.8	-58.7463
42.85	-58.4717										42.85	-58.4717
42.9	-58.7769										42.9	-58.7769
42.95	-58.96										42.95	-58.96
43	-58.8684										43	-58.8684
43.05	-58.6243										43.05	-58.6243
43.1	-58.8074										43.1	-58.8074
43.15	-59.021										43.15	-59.021
43.2	-58.7158										43.2	-58.7158
43.25	-58.6548										43.25	-58.6548
43.3	-58.9905										43.3	-58.9905
43.35	-58.7769										43.35	-58.7769
43.4	-58.5937										43.4	-58.5937
43.45	-58.96										43.45	-58.96
43.5	-58.6548										43.5	-58.6548
43.55	-58.7158										43.55	-58.7158
43.6	-58.8379										43.6	-58.8379
43.65	-58.3801										43.65	-58.3801
43.7	-58.8379										43.7	-58.8379
43.75	-58.6853										43.75	-58.6853
43.8	-58.7463										43.8	-58.7463
43.85	-58.8989										43.85	-58.8989
43.9	-58.4106										43.9	-58.4106
43.95	-58.9294										43.95	-58.9294
44	-58.6243										44	-58.6243
44.05	-58.8989										44.05	-58.8989
44.1	-58.8379										44.1	-58.8379
44.15	-58.6548										44.15	-58.6548
44.2	-58.9905										44.2	-58.9905
44.25	-58.4717										44.25	-58.4717
44.3	-58.9294										44.3	-58.9294
44.35	-58.8684										44.35	-58.8684
44.4	-58.8074										44.4	-58.8074
44.45	-58.8989										44.45	-58.8989
44.5	-58.5632										44.5	-58.5632
44.55	-58.9905										44.55	-58.9905
44.6	-58.8684										44.6	-58.8684
44.65	-58.6243										44.65	-58.6243
44.7	-58.96										44.7	-58.96
44.75	-58.7463										44.75	-58.7463
44.8	-58.8074										44.8	-58.8074
44.85	-58.8684										44.85	-58.8684
44.9	-58.6243										44.9	-58.6243
44.95	-58.96										44.95	-58.96
45	-58.8684										45	-58.8684
45.05	-58.5632										45.05	-58.5632
45.1	-58.8989										45.1	-58.8989
45.15	-58.9294										45.15	-58.9294
45.2	-58.5022										45.2	-58.5022
45.25	-58.9294										45.25	-58.9294
45.3	-58.9294										45.3	-58.9294
45.35	-58.5327										45.35	-58.5327
45.4	-59.0515										45.4	-59.0515
45.45	-58.8989										45.45	-58.8989
45.5	-58.5632										45.5	-58.5632
45.55	-58.96										45.55	-58.96
45.6	-58.96										45.6	-58.96
45.65	-58.6243										45.65	-58.6243
45.7	-58.9294										45.7	-58.9294
45.75	-59.0515										45.75	-59.0515
45.8	-58.6243										45.8	-58.6243
45.85	-58.8989										45.85	-58.8989
45.9	-58.96										45.9	-58.96
45.95	-58.6853										45.95	-58.6853
46	-58.7769										46	-58.7769
46.05	-59.021										46.05	-59.021
46.1	-58.8379										46.1	-58.8379
46.15	-58.5632										46.15	-58.5632
46.2	-58.9294										46.2	-58.9294
46.25	-58.9294										46.25	-58.9294
46.3	-58.5937										46.3	-58.5937
46.35	-58.8684										46.35	-58.8684
46.4	-58.8684										46.4	-58.8684
46.45	-58.6548										46.45	-58.6548
46.5	-58.7769										46.5	-58.7769
46.55	-58.9905										46.55	-58.9905
46.6	-58.8074										46.6	-58.8074
46.65	-58.5937										46.65	-58.5937
46.7	-58.9905										46.7	-58.9905
46.75	-58.96										46.75	-58.96
46.8	-58.5937										46.8	-58.5937
46.85	-58.8684										46.85	-58.8684
46.9	-59.082										46.9	-59.082
46.95	-58.8379										46.95	-58.8379
47	-58.6243										47	-58.6243
47.05	-59.082										47.05	-59.082
47.1	-59.021										47.1	-59.021
47.15	-58.7158										47.15	-58.7158
47.2	-58.7463										47.2	-58.7463
47.25	-59.082										47.25	-59.082
47.3	-58.96										47.3	-58.96
47.35	-58.6548										47.35	-58.6548
47.4	-58.8989										47.4	-58.8989
47.45	-58.9905										47.45	-58.9905
47.5	-58.9294										47.5	-58.9294
47.55	-58.5327										47.55	-58.5327
47.6	-58.9294										47.6	-58.9294
47.65	-58.8989										47.65	-58.8989
47.7	-58.8074										47.7	-58.8074
47.75	-58.5937										47.75	-58.5937
47.8	-58.9294										47.8	-58.9294
47.85	-58.8379										47.85	-58.8379
47.9	-58.7769										47.9	-58.7769
47.95	-58.6243										47.95	-58.6243
48	-58.9294										48	-58.9294
48.05	-58.96										48.05	-58.96
48.1	-58.8074										48.1	-58.8074
48.15	-58.6548										48.15	-58.6548
48.2	-58.8989										48.2	-58.8989
48.25	-58.9294										48.25	-58.9294
48.3	-58.8074										48.3	-58.8074
48.35	-58.6548										48.35	-58.6548
48.4	-58.8684										48.4	-58.8684
48.45	-58.9905										48.45	-58.9905
48.5	-58.8684										48.5	-58.8684
48.55	-58.5327										48.55	-58.5327
48.6	-58.8379										48.6	-58.8379
48.65	-58.9294										48.65	-58.9294
48.7	-58.9294										48.7	-58.9294
48.75	-58.6853										48.75	-58.6853
48.8	-58.6243										48.8	-58.6243
48.85	-58.8989										48.85	-58.8989
48.9	-58.8074										48.9	-58.8074
48.95	-58.8074										48.95	-58.8074
49	-58.4412										49	-58.4412
49.05	-58.8074										49.05	-58.8074
49.1	-58.8989										49.1	-58.8989
49.15	-58.9905										49.15	-58.9905
49.2	-58.7463										49.2	-58.7463
49.25	-58.5327										49.25	-58.5327
49.3	-58.8989										49.3	-58.8989
49.35	-59.0515										49.35	-59.0515
49.4	-58.96										49.4	-58.96
49.45	-58.7463										49.45	-58.7463
49.5	-58.6243										49.5	-58.6243
49.55	-58.8989										49.55	-58.8989
49.6	-59.0515										49.6	-59.0515
49.65	-58.8684										49.65	-58.8684
49.7	-58.7158										49.7	-58.7158
49.75	-58.6243										49.75	-58.6243
49.8	-58.9294										49.8	-58.9294
49.85	-59.0515										49.85	-59.0515
49.9	-58.8684										49.9	-58.8684
49.95	-58.7158										49.95	-58.7158
50	-58.4412										50	-58.4412
50.05	-58.7463										50.05	-58.7463
50.1	-59.021										50.1	-59.021
50.15	-58.8684										50.15	-58.8684
50.2	-58.8379										50.2	-58.8379
50.25	-58.6548										50.25	-58.6548
50.3	-58.6243										50.3	-58.6243
50.35	-58.8989										50.35	-58.8989
50.4	-59.0515										50.4	-59.0515
50.45	-59.021										50.45	-59.021
50.5	-58.8379										50.5	-58.8379
50.55	-58.6548										50.55	-58.6548
50.6	-58.7463										50.6	-58.7463
50.65	-59.1125										50.65	-59.1125
50.7	-58.96										50.7	-58.96
50.75	-58.96										50.75	-58.96
50.8	-58.8989										50.8	-58.8989
50.85	-58.6853										50.85	-58.6853
50.9	-58.5937										50.9	-58.5937
50.95	-58.9294										50.95	-58.9294
51	-59.021										51	-59.021
51.05	-59.0515										51.05	-59.0515
51.1	-58.8074										51.1	-58.8074
51.15	-58.5022										51.15	-58.5022
51.2	-58.7769										51.2	-58.7769
51.25	-59.021										51.25	-59.021
51.3	-58.9294										51.3	-58.9294
51.35	-58.6243										51.35	-58.6243
51.4	-58.5937										51.4	-58.5937
51.45	-58.8989										51.45	-58.8989
51.5	-58.8379										51.5	-58.8379
51.55	-58.4717										51.55	-58.4717
51.6	-58.8684										51.6	-58.8684
51.65	-58.8989										51.65	-58.8989
51.7	-58.4106										51.7	-58.4106
51.75	-58.8684										51.75	-58.8684
51.8	-58.8684										51.8	-58.8684
51.85	-58.6853										51.85	-58.6853
51.9	-58.9294										51.9	-58.9294
51.95	-58.5937										51.95	-58.5937
52	-58.8074										52	-58.8074
52.05	-58.9294										52.05	-58.9294
52.1	-58.5327										52.1	-58.5327
52.15	-58.8989										52.15	-58.8989
52.2	-58.4717										52.2	-58.4717
52.25	-58.8684										52.25	-58.8684
52.3	-58.7463										52.3	-58.7463
52.35	-58.5022										52.35	-58.5022
52.4	-58.8074										52.4	-58.8074
52.45	-58.3191										52.45	-58.3191
52.5	-58.8989										52.5	-58.8989
52.55	-58.6243										52.55	-58.6243
52.6	-58.5937										52.6	-58.5937
52.65	-58.7463										52.65	-58.7463
52.7	-58.3801										52.7	-58.3801
52.75	-58.8684										52.75	-58.8684
52.8	-58.5632										52.8	-58.5632
52.85	-58.6243										52.85	-58.6243
52.9	-58.8989										52.9	-58.8989
52.95	-58.3801										52.95	-58.3801
53	-58.8074										53	-58.8074
53.05	-58.8074										53.05	-58.8074
53.1	-58.5022										53.1	-58.5022
53.15	-58.9294										53.15	-58.9294
53.2	-58.6548										53.2	-58.6548
53.25	-58.5937										53.25	-58.5937
53.3	-58.9294										53.3	-58.9294
53.35	-58.6853										53.35	-58.6853
53.4	-58.5937										53.4	-58.5937
53.45	-58.7463										53.45	-58.7463
53.5	-58.5632										53.5	-58.5632
53.55	-58.6243										53.55	-58.6243
53.6	-58.8074										53.6	-58.8074
53.65	-58.5632										53.65	-58.5632
53.7	-58.6548										53.7	-58.6548
53.75	-58.9294										53.75	-58.9294
53.8	-58.6243										53.8	-58.6243
53.85	-58.5937										53.85	-58.5937
53.9	-58.7769										53.9	-58.7769
53.95	-58.7463										53.95	-58.7463
54	-58.5937										54	-58.5937
54.05	-58.8684										54.05	-58.8684
54.1	-58.6853										54.1	-58.6853
54.15	-58.5632										54.15	-58.5632
54.2	-58.9294										54.2	-58.9294
54.25	-58.7463										54.25	-58.7463
54.3	-58.4106										54.3	-58.4106
54.35	-58.8684										54.35	-58.8684
54.4	-58.8684										54.4	-58.8684
54.45	-58.4412										54.45	-58.4412
54.5	-58.6853										54.5	-58.6853
54.55	-58.8379										54.55	-58.8379
54.6	-58.6243										54.6	-58.6243
54.65	-58.5632										54.65	-58.5632
54.7	-58.8074										54.7	-58.8074
54.75	-58.7158										54.75	-58.7158
54.8	-58.3801										54.8	-58.3801
54.85	-58.8379										54.85	-58.8379
54.9	-58.7463										54.9	-58.7463
54.95	-58.4717										54.95	-58.4717
55	-58.5937										55	-58.5937
55.05	-58.8684										55.05	-58.8684
55.1	-58.5937										55.1	-58.5937
55.15	-58.3801										55.15	-58.3801
55.2	-58.8684										55.2	-58.8684
55.25	-58.6853										55.25	-58.6853
55.3	-58.5022										55.3	-58.5022
55.35	-58.5632										55.35	-58.5632
55.4	-58.8684										55.4	-58.8684
55.45	-58.8074										55.45	-58.8074
55.5	-58.4106										55.5	-58.4106
55.55	-58.7463										55.55	-58.7463
55.6	-58.8074										55.6	-58.8074
55.65	-58.6243										55.65	-58.6243
55.7	-58.4106										55.7	-58.4106
55.75	-58.8684										55.75	-58.8684
55.8	-58.8074										55.8	-58.8074
55.85	-58.5632										55.85	-58.5632
55.9	-58.5022										55.9	-58.5022
55.95	-58.7769										55.95	-58.7769
56	-58.8074										56	-58.8074
56.05	-58.5022										56.05	-58.5022
56.1	-58.5327										56.1	-58.5327
56.15	-58.8074										56.15	-58.8074
56.2	-58.7158										56.2	-58.7158
56.25	-58.4717										56.25	-58.4717
56.3	-58.5327										56.3	-58.5327
56.35	-58.8074										56.35	-58.8074
56.4	-58.6853										56.4	-58.6853
56.45	-58.5632										56.45	-58.5632
56.5	-58.5632										56.5	-58.5632
56.55	-58.8684										56.55	-58.8684
56.6	-58.8074										56.6	-58.8074
56.65	-58.6243										56.65	-58.6243
56.7	-58.5327										56.7	-58.5327
56.75	-58.8074										56.75	-58.8074
56.8	-58.7463										56.8	-58.7463
56.85	-58.6548										56.85	-58.6548
56.9	-58.4717										56.9	-58.4717
56.95	-58.6853										56.95	-58.6853
57	-58.8074										57	-58.8074
57.05	-58.7769										57.05	-58.7769
57.1	-58.4106										57.1	-58.4106
57.15	-58.5022										57.15	-58.5022
57.2	-58.8074										57.2	-58.8074
57.25	-58.6853										57.25	-58.6853
57.3	-58.5632										57.3	-58.5632
57.35	-58.4106										57.35	-58.4106
57.4	-58.6548										57.4	-58.6548
57.45	-58.7463										57.45	-58.7463
57.5	-58.7158										57.5	-58.7158
57.55	-58.5327										57.55	-58.5327
57.6	-58.3801										57.6	-58.3801
57.65	-58.6548										57.65	-58.6548
57.7	-58.8379										57.7	-58.8379
57.75	-58.7463										57.75	-58.7463
57.8	-58.5632										57.8	-58.5632
57.85	-58.4412										57.85	-58.4412
57.9	-58.8074										57.9	-58.8074
57.95	-58.8989										57.95	-58.8989
58	-58.7158										58	-58.7158
58.05	-58.5937										58.05	-58.5937
58.1	-58.4412										58.1	-58.4412
58.15	-58.7158										58.15	-58.7158
58.2	-58.8684										58.2	-58.8684
58.25	-58.7158										58.25	-58.7158
58.3	-58.5937										58.3	-58.5937
58.35	-58.4717										58.35	-58.4717
58.4	-58.6853										58.4	-58.6853
58.45	-58.7463										58.45	-58.7463
58.5	-58.7463										58.5	-58.7463
58.55	-58.6548										58.55	-58.6548
58.6	-58.5327										58.6	-58.5327
58.65	-58.3496										58.65	-58.3496
58.7	-58.6243										58.7	-58.6243
58.75	-58.8684										58.75	-58.8684
58.8	-58.7158										58.8	-58.7158
58.85	-58.6548										58.85	-58.6548
58.9	-58.4412										58.9	-58.4412
58.95	-58.4717										58.95	-58.4717
59	-58.7463										59	-58.7463
59.05	-58.7463										59.05	-58.7463
59.1	-58.7769										59.1	-58.7769
59.15	-58.7463										59.15	-58.7463
59.2	-58.6548										59.2	-58.6548
59.25	-58.4412										59.25	-58.4412
59.3	-58.6548										59.3	-58.6548
59.35	-58.9294										59.35	-58.9294
59.4	-58.9294										59.4	-58.9294
59.45	-58.6548										59.45	-58.6548
59.5	-58.4106										59.5	-58.4106
59.55	-58.5632										59.55	-58.5632
59.6	-58.9294										59.6	-58.9294
59.65	-58.8379										59.65	-58.8379
59.7	-58.5632										59.7	-58.5632
59.75	-58.5632										59.75	-58.5632
59.8	-58.8379										59.8	-58.8379
59.85	-58.7769										59.85	-58.7769
59.9	-58.4412										59.9	-58.4412
59.95	-58.8074										59.95	-58.8074
60	-58.8074										60	-58.8074
60.05	-58.4717										60.05	-58.4717
60.1	-58.9294										60.1	-58.9294
60.15	-58.6243										60.15	-58.6243
60.2	-58.7769										60.2	-58.7769
60.25	-58.8379										60.25	-58.8379
60.3	-58.5022										60.3	-58.5022
60.35	-58.8684										60.35	-58.8684
60.4	-58.7463										60.4	-58.7463
60.45	-58.7769										60.45	-58.7769
[truncated: 64,325 more rows]

## Sheet: Fig. 1 suppl 7g
Mech											VS										Current							VS
[truncated: 4 more rows]
