# Supplementary material for: Intrinsic mechanical sensitivity of mammalian auditory neurons as a contributor to sound-driven neural activity
Source: eLife. 2022 Mar 10;11:e74948. doi: 10.7554/eLife.74948 (PMC8942473; doi:10.7554/eLife.74948)
Supplement: Figure 1—source data 1. [file elife-74948-fig1-data1.xlsx]

## Sheet: Figure 1a
Figure 1-source data1			Data for Figure 1a, showing the effects of perfusion rate and membrane potential responses											Figure 1.
Time	Voltage													Mouse primary auditory neurons are mechanically sensitive.
0	-61.7859
10	-62.0239
20	-61.8958
30	-61.5784
40	-61.9934
50	-62.2864
60	-61.8896
70	-61.9385
80	-61.6455
90	-61.7126
100	-61.5479
110	-61.8408
120	-61.731
130	-62.0239
140	-61.8103
150	-61.5112
160	-61.3037
170	-61.4258
180	-61.4624
190	-62.2375
200	-61.5112
210	-61.3953
220	-61.8774
230	-61.853
240	-61.6394
250	-62.1521
260	-61.7493
270	-61.0474
280	-61.9385
290	-61.5112
300	-61.5356
310	-62.2681
320	-61.6882
330	-60.8154
340	-61.9202
350	-61.2305
360	-61.8958
370	-61.4014
380	-61.8652
390	-61.9568
400	-61.3953
410	-62.2864
420	-61.8713
430	-62.0178
440	-61.3647
450	-61.908
460	-62.4146
470	-61.676
480	-61.6943
490	-61.676
500	-62.2925
510	-61.8225
520	-61.5479
530	-62.2437
540	-61.8958
550	-61.5845
560	-62.0972
570	-61.5051
580	-61.4746
590	-61.792
600	-61.4197
610	-62.0422
620	-60.8826
630	-61.3098
640	-61.7676
650	-62.0789
660	-62.1033
670	-62.0117
680	-62.2009
690	-61.676
700	-61.7615
710	-61.8347
720	-61.7432
730	-61.8958
740	-62.0544
750	-62.2559
760	-61.2915
770	-62.0117
780	-61.3586
790	-62.0667
800	-62.0178
810	-61.4563
820	-61.6028
830	-62.1033
840	-61.8652
850	-61.2732
860	-62.1887
870	-60.9741
880	-61.9995
890	-62.1521
900	-61.9446
910	-61.8896
920	-61.6699
930	-61.6333
940	-61.9873
950	-62.2986
960	-62.085
970	-61.9019
980	-61.8347
990	-61.2732
1000	-62.085
1010	-61.9507
1020	-61.5967
1030	-61.6455
1040	-62.2742
1050	-62.1094
1060	-60.3699
1070	-62.2803
1080	-61.4929
1090	-62.0178
1100	-62.0239
1110	-61.6882
1120	-61.4258
1130	-61.9324
1140	-61.5479
1150	-61.6089
1160	-62.0117
1170	-61.9019
1180	-62.0239
1190	-61.8469
1200	-61.8225
1210	-61.2976
1220	-61.6333
1230	-62.0728
1240	-61.2732
1250	-61.9629
1260	-61.6089
1270	-62.323
1280	-61.8652
1290	-61.8347
1300	-61.3647
1310	-61.8164
1320	-61.3403
1330	-61.1145
1340	-61.5417
1350	-61.7798
1360	-62.0117
1370	-61.8896
1380	-61.0779
1390	-61.5601
1400	-61.6211
1410	-61.8103
1420	-61.3586
1430	-61.3953
1440	-62.3657
1450	-61.4868
1460	-62.3779
1470	-61.5723
1480	-61.6943
1490	-61.322
1500	-61.7432
1510	-61.4258
1520	-61.792
1530	-61.5479
1540	-61.7554
1550	-62.0239
1560	-62.2192
1570	-61.7981
1580	-61.9568
1590	-61.4624
1600	-61.6333
1610	-62.0056
1620	-61.4319
1630	-61.3403
1640	-61.5173
1650	-62.1826
1660	-61.6028
1670	-61.8896
1680	-61.5967
1690	-61.969
1700	-61.6821
1710	-61.1694
1720	-61.6333
1730	-62.2314
1740	-61.7004
1750	-62.5
1760	-61.3464
1770	-61.377
1780	-61.8713
1790	-61.9263
1800	-61.8713
1810	-61.8164
1820	-61.6394
1830	-61.9812
1840	-61.6272
1850	-62.0117
1860	-62.1094
1870	-61.8896
1880	-62.0056
1890	-61.7737
1900	-61.9629
1910	-61.0291
1920	-61.8896
1930	-61.7126
1940	-61.8835
1950	-61.9324
1960	-61.9324
1970	-61.7126
1980	-60.6262
1990	-61.8042
2000	-61.6455
2010	-61.7493
2020	-61.5051
2030	-62.0422
2040	-61.9324
2050	-61.8042
2060	-61.6089
2070	-61.6333
2080	-61.9751
2090	-61.8103
2100	-61.8958
2110	-61.7126
2120	-61.5051
2130	-61.9019
2140	-61.2061
2150	-61.4563
2160	-61.4075
2170	-62.4939
2180	-61.6638
2190	-61.4502
2200	-61.6638
2210	-61.261
2220	-61.853
2230	-61.6577
2240	-61.499
2250	-61.6455
2260	-61.084
2270	-61.2366
2280	-62.0544
2290	-61.4563
2300	-61.7798
2310	-61.9873
2320	-61.6272
2330	-61.7554
2340	-61.1511
2350	-62.0178
2360	-61.792
2370	-61.9019
2380	-61.8347
2390	-61.0474
2400	-62.439
2410	-62.5488
2420	-61.2183
2430	-61.9019
2440	-61.9324
2450	-62.0667
2460	-61.9507
2470	-61.7737
2480	-61.2244
2490	-62.5244
2500	-61.3892
2510	-61.5723
2520	-61.4746
2530	-61.4746
2540	-61.5417
2550	-61.6882
2560	-61.7065
2570	-61.8225
2580	-61.7554
2590	-62.1277
2600	-61.5479
2610	-61.9629
2620	-61.5295
2630	-61.4258
2640	-61.9019
2650	-62.1704
2660	-61.5234
2670	-60.8582
2680	-61.2671
2690	-61.8958
2700	-61.7676
2710	-61.5234
2720	-61.7249
2730	-61.7493
2740	-61.4258
2750	-61.5295
2760	-61.3342
2770	-61.3403
2780	-61.4746
2790	-62.0361
2800	-61.9324
2810	-61.499
2820	-61.4929
2830	-61.8591
2840	-61.676
2850	-62.1765
2860	-61.9507
2870	-61.9995
2880	-61.8103
2890	-62.0361
2900	-61.2732
2910	-61.615
2920	-61.7737
2930	-61.6394
2940	-61.3647
2950	-61.9202
2960	-61.8042
2970	-61.6455
2980	-61.7493
2990	-60.8093
3000	-61.731
3010	-61.3159
3020	-61.8164
3030	-61.792
3040	-61.9873
3050	-61.2671
3060	-61.9934
3070	-61.9751
3080	-61.8591
3090	-62.0544
3100	-62.1765
3110	-62.0911
3120	-61.8225
3130	-61.9446
3140	-61.8103
3150	-61.8958
3160	-62.2131
3170	-61.4502
3180	-62.0361
3190	-61.9812
3200	-61.9446
3210	-61.1145
3220	-61.9751
3230	-62.1216
3240	-60.8459
3250	-62.5488
3260	-61.969
3270	-61.8286
3280	-62.0483
3290	-61.6394
3300	-61.6821
3310	-62.0605
3320	-61.5845
3330	-61.4685
3340	-61.9019
3350	-61.7249
3360	-62.2986
3370	-61.7065
3380	-61.4136
3390	-61.6333
3400	-62.1216
3410	-61.6821
3420	-61.9141
3430	-61.9385
3440	-61.6333
3450	-62.0605
3460	-61.6699
3470	-61.7737
3480	-61.7249
3490	-61.9812
3500	-61.6638
3510	-62.0667
3520	-61.6638
3530	-62.1338
3540	-61.3586
3550	-61.5295
3560	-61.6577
3570	-61.5845
3580	-61.4746
3590	-61.7798
3600	-61.7065
3610	-61.676
3620	-61.3464
3630	-61.908
3640	-61.7249
3650	-61.9263
3660	-61.1755
3670	-61.9385
3680	-61.6577
3690	-61.9385
3700	-61.5295
3710	-61.3708
3720	-61.7371
3730	-61.6455
3740	-61.499
3750	-61.4868
3760	-62.1033
3770	-61.8713
3780	-61.0779
3790	-62.0911
3800	-61.9873
3810	-59.9365
3820	-62.0361
3830	-60.7666
3840	-61.1328
3850	-61.6638
3860	-61.0107
3870	-61.6699
3880	-61.8774
3890	-61.2671
3900	-62.2314
3910	-61.0352
3920	-62.1765
3930	-62.0544
3940	-61.2793
3950	-60.8948
3960	-61.9019
3970	-61.6699
3980	-61.8774
3990	-61.676
4000	-62.1216
4010	-61.0779
4020	-61.4929
4030	-61.3708
4040	-61.8103
4050	-61.8591
4060	-61.5601
4070	-61.261
4080	-62.2375
4090	-61.5417
4100	-61.7798
4110	-61.7859
4120	-61.9324
4130	-61.8469
4140	-59.8938
4150	-60.8643
4160	-61.8591
4170	-61.8774
4180	-61.3831
4190	-61.4136
4200	-61.7798
4210	-61.2122
4220	-61.6699
4230	-61.4807
4240	-61.4075
4250	-61.9263
4260	-61.2366
4270	-61.9202
4280	-61.4258
4290	-60.73
4300	-61.7004
4310	-61.9629
4320	-61.8835
4330	-60.9802
4340	-62.0605
4350	-61.5662
4360	-61.7554
4370	-62.0056
4380	-61.5845
4390	-61.676
4400	-62.3718
4410	-61.7371
4420	-61.731
4430	-61.9629
4440	-61.8774
4450	-60.8459
4460	-61.4258
4470	-61.3525
4480	-61.9385
4490	-61.7249
4500	-62.207
4510	-61.3586
4520	-61.2366
4530	-61.5967
4540	-61.9385
4550	-61.9202
4560	-61.9507
4570	-61.3647
4580	-61.3464
4590	-62.262
4600	-61.1572
4610	-62.1582
4620	-62.1277
4630	-61.3464
4640	-61.377
4650	-61.9141
4660	-61.8774
4670	-60.8887
4680	-62.03
4690	-60.8459
4700	-61.5784
4710	-61.4685
4720	-61.4868
4730	-62.6831
4740	-61.0168
4750	-61.9873
4760	-61.3525
4770	-61.9263
4780	-60.7544
4790	-61.4014
4800	-61.5601
4810	-61.6089
4820	-61.4258
4830	-62.207
4840	-61.1877
4850	-61.8164
4860	-61.4441
4870	-61.145
4880	-61.3586
4890	-62.2009
4900	-61.1816
4910	-61.5967
4920	-62.0117
4930	-61.6272
4940	-60.4614
4950	-62.3169
4960	-61.676
4970	-61.731
4980	-61.438
4990	-61.554
5000	-61.0474
5010	-61.9751
5020	-61.1877
5030	-61.8896
5040	-61.2976
5050	-62.0667
5060	-61.9995
5070	-61.9446
5080	-61.5967
5090	-61.6333
5100	-60.907
5110	-61.6394
5120	-62.2986
5130	-61.0229
5140	-61.7249
5150	-61.7065
5160	-61.6577
5170	-61.2732
5180	-61.6333
5190	-61.4929
5200	-60.8948
5210	-62.1643
5220	-60.6567
5230	-62.0483
5240	26.6418
5250	-61.8286
5260	-61.5723
5270	-61.7798
5280	-61.3831
5290	-61.8835
5300	-62.0178
5310	-61.4014
5320	-61.5723
5330	-60.9009
5340	-61.9385
5350	-61.3953
5360	-61.5723
5370	-61.4075
5380	-61.7188
5390	-61.4563
5400	-62.1277
5410	-60.5896
5420	-61.9202
5430	-62.0605
5440	-61.6638
5450	-61.8896
5460	-61.6211
5470	-61.7676
5480	-60.9131
5490	-61.9629
5500	-61.1694
5510	-61.2488
5520	-61.5784
5530	-62.0483
5540	-61.7554
5550	-62.2253
5560	-61.2305
5570	-61.6882
5580	-61.6821
5590	-61.7554
5600	-61.6333
5610	-61.5723
5620	-61.7126
5630	-80.2917
5640	-61.9446
5650	-62.1094
5660	-60.6567
5670	-61.8164
5680	-61.7737
5690	-61.3647
5700	-61.9873
5710	-61.6028
5720	-61.615
5730	-61.8225
5740	-61.5051
5750	-61.6028
5760	-61.6882
5770	-61.7737
5780	-61.0779
5790	-61.1023
5800	-61.8103
5810	-61.4075
5820	-61.7065
5830	-60.791
5840	-61.4929
5850	-62.3413
5860	-61.4319
5870	-61.8164
5880	-61.908
5890	-61.4746
5900	-61.7737
5910	-61.2183
5920	-61.5784
5930	-62.207
5940	-62.3169
5950	-61.3708
5960	-62.207
5970	-62.146
5980	-61.4624
5990	-61.4746
6000	-62.1399
6010	-61.6455
6020	-61.8713
6030	-60.9009
6040	-61.5051
6050	-62.0178
6060	-61.6333
6070	-61.7249
6080	-61.4929
6090	-61.7859
6100	-61.4502
6110	-61.7126
6120	-61.3647
6130	-61.2976
6140	-61.4075
6150	-62.0911
6160	-61.3586
6170	-61.3708
6180	-61.3403
6190	-60.9192
6200	-62.1582
6210	-61.0962
6220	-61.5601
6230	-61.4319
6240	-61.3525
6250	-61.9141
6260	-61.2427
6270	-61.8103
6280	-61.4563
6290	-61.792
6300	-62.0483
6310	-61.5112
6320	-61.5784
6330	-61.3464
6340	-61.8591
6350	-61.438
6360	-61.6028
6370	-61.7737
6380	-61.9202
6390	-61.5723
6400	-61.4014
6410	-61.4624
6420	-61.4136
6430	-61.6882
6440	-61.3586
6450	-61.5601
6460	-61.1938
6470	-61.6699
6480	-60.614
6490	-61.8408
6500	-61.676
6510	-61.4685
6520	-61.4746
6530	-61.6394
6540	-61.8286
6550	-61.7004
6560	-62.4451
6570	-61.8042
6580	-62.2192
6590	-61.5417
6600	-61.4746
6610	-60.9009
6620	-61.6821
6630	-62.085
6640	-61.4624
6650	-61.8958
6660	-61.3892
6670	-61.0291
6680	-61.3831
6690	-61.9324
6700	-61.7859
6710	-61.4929
6720	-61.6089
6730	-61.3464
6740	-61.3647
6750	-62.4023
6760	-61.7981
6770	-61.7004
6780	-62.2009
6790	-61.1572
6800	-61.9568
6810	-61.0962
6820	-61.9751
6830	-61.1938
6840	-61.7371
6850	-62.6587
6860	-61.2915
6870	-61.5295
6880	-61.3159
6890	-61.3831
6900	-60.8826
6910	-61.3403
6920	-61.5295
6930	-61.8164
6940	-82.1167
6950	-61.6821
6960	-61.4441
6970	-61.3281
6980	-61.1877
6990	-61.1023
7000	-62.1338
7010	-61.5479
7020	-61.4319
7030	-61.9507
7040	-61.2
7050	-61.3098
7060	-61.6455
7070	-61.6882
7080	-61.4502
7090	-61.9568
7100	-61.7371
7110	-61.676
7120	-61.0352
7130	-60.6934
7140	-61.9629
7150	-60.9741
7160	-61.8469
7170	-61.5417
7180	-62.2131
7190	-61.7981
7200	-61.7249
7210	-60.9558
7220	-61.6028
7230	-61.7188
7240	-60.9375
7250	-61.5845
7260	-61.4258
7270	-61.8164
7280	-61.9446
7290	-61.1816
7300	-62.2986
7310	-79.5776
7320	-61.4563
7330	-61.5845
7340	-61.7981
7350	-61.8408
7360	-60.6812
7370	-61.7126
7380	-61.3403
7390	-61.9507
7400	-61.9507
7410	-61.438
7420	-61.9019
7430	-62.0361
7440	-62.0422
7450	-62.2253
7460	-61.792
7470	-61.554
7480	-61.8164
7490	-61.7004
7500	-61.5112
7510	-62.1826
7520	-61.5845
7530	-61.6394
7540	-61.4441
7550	-62.1765
7560	-62.0483
7570	-61.7798
7580	-62.0483
7590	-61.8652
7600	-61.9019
7610	-61.4014
7620	-61.499
7630	-62.0239
7640	-59.9182
7650	-61.7798
7660	-61.2244
7670	-61.7798
7680	-60.9009
7690	-61.9446
7700	-61.2976
7710	-62.1277
7720	-61.3037
7730	-61.6333
7740	-61.6333
7750	-61.1633
7760	-61.6394
7770	-61.8408
7780	-61.1816
7790	-61.6638
7800	-61.4746
7810	-61.7004
7820	-61.2915
7830	-61.1938
7840	-61.4502
7850	-61.4624
7860	-61.2976
7870	-61.8286
7880	-61.2793
7890	-61.9141
7900	-61.4441
7910	-61.5906
7920	-61.4136
7930	-62.1033
7940	-58.9966
7950	-61.6882
7960	-61.7554
7970	-60.9436
7980	-61.6516
7990	-61.3892
8000	-61.4136
8010	-61.4746
8020	-61.6333
8030	-61.6638
8040	-61.9629
8050	-61.4441
8060	-61.9141
8070	-60.9741
8080	-61.3586
8090	-61.615
8100	-61.7004
8110	-61.4075
8120	-61.3281
8130	-60.9924
8140	-62.0972
8150	-61.6272
8160	-61.9507
8170	-60.2844
8180	-61.7676
8190	-61.8713
8200	-61.5173
8210	-61.6089
8220	-61.7188
8230	-61.8286
8240	-61.2854
8250	-62.2864
8260	-61.2244
8270	-61.5723
8280	-61.6577
8290	-62.2314
8300	-61.0535
8310	-61.7981
8320	-61.4136
8330	-61.7065
8340	-62.0605
8350	-61.6211
8360	-61.499
8370	-61.2061
8380	-61.6638
8390	-61.2122
8400	-62.3169
8410	-61.5356
8420	-61.4319
8430	-61.8713
8440	-61.5173
8450	-62.1826
8460	-61.2671
8470	-61.8774
8480	-61.8774
8490	-61.4624
8500	-62.5
8510	-61.1328
8520	-61.5051
8530	-61.4136
8540	-61.7798
8550	-61.3831
8560	-61.0474
8570	-61.5784
8580	-61.9385
8590	-61.9873
8600	-61.2793
8610	-61.792
8620	-61.3647
8630	-62.2192
8640	-61.3708
8650	-62.2009
8660	-61.4502
8670	-62.0239
8680	-61.8958
8690	-62.0544
8700	-60.5286
8710	-61.2427
8720	-61.8774
8730	-61.7249
8740	-61.7065
8750	-62.0605
8760	-61.4014
8770	-61.8835
8780	-61.7737
8790	-61.731
8800	-61.7126
8810	-61.7004
8820	-61.7004
8830	-61.7554
8840	-61.7554
8850	-61.8164
8860	-61.2183
8870	-62.1765
8880	-61.0168
8890	-61.1145
8900	-62.5
8910	-61.8835
8920	-61.6089
8930	-61.1755
8940	-61.6089
8950	-62.1643
8960	-61.0596
8970	-62.0728
8980	-61.6821
8990	-61.7188
9000	-61.6394
9010	-61.4746
9020	-61.3342
9030	-61.676
9040	-60.8032
9050	-61.5601
9060	-61.7249
9070	-62.0239
9080	-61.792
9090	-60.9314
9100	-62.1826
9110	-61.2915
9120	-60.9375
9130	-61.9385
9140	-61.4136
9150	-61.9019
9160	-61.1633
9170	-61.731
9180	-61.1511
9190	-61.2427
9200	-61.5723
9210	-61.6943
9220	-61.6211
9230	-61.6821
9240	-61.8469
9250	-61.4319
9260	-61.6333
9270	-61.731
9280	-61.969
9290	-61.3831
9300	-61.7188
9310	-61.7859
9320	-61.9324
9330	-61.0779
9340	-61.2061
9350	-61.4014
9360	-61.9263
9370	-61.969
9380	-61.3892
9390	-61.4075
9400	-62.0789
9410	-61.6638
9420	-61.2732
9430	-61.6333
9440	-61.3708
9450	-61.4685
9460	-61.3708
9470	-61.4868
9480	-62.0117
9490	-61.5173
9500	-61.5356
9510	-61.7615
9520	-61.9751
9530	-59.9731
9540	-62.4329
9550	-61.8103
9560	-61.7126
9570	-61.5479
9580	-61.2915
9590	-61.7432
9600	-61.8774
9610	-61.7432
9620	-60.6812
9630	-61.7859
9640	-61.8164
9650	-61.4258
9660	-61.9385
9670	-61.5906
9680	-60.9924
9690	-61.5906
9700	-61.377
9710	-61.9019
9720	-60.083
9730	-61.6821
9740	-61.4746
9750	-61.5906
9760	-62.0239
9770	-61.3037
9780	-61.8652
9790	-61.6943
9800	-61.6211
9810	-61.0596
9820	-61.3708
9830	-60.4492
9840	-62.4512
9850	-61.499
9860	-61.1816
9870	-62.1216
9880	-61.4929
9890	-62.2192
9900	-61.6821
9910	-61.8896
9920	-61.731
9930	-61.5906
9940	-62.0483
9950	-60.7483
9960	-60.6812
9970	-62.323
9980	-61.6516
9990	-61.3281
10000	-61.4685
10010	-61.2122
10020	-62.262
10030	-60.9558
10040	-60.9314
10050	-62.2742
10060	-61.499
10070	-61.7126
10080	-61.1084
10090	-61.5051
10100	-61.8774
10110	-61.3831
10120	-61.7737
10130	-61.5662
10140	-61.4624
10150	-61.615
10160	-61.4319
10170	-61.6455
10180	-61.7432
10190	-61.969
10200	-61.4868
10210	-61.3281
10220	-61.2122
10230	-61.2732
10240	-61.7859
10250	-61.8774
10260	-61.0535
10270	-61.3464
10280	-61.5173
10290	-61.9995
10300	-73.0957
10310	-60.675
10320	-61.1511
10330	-61.853
10340	-61.7615
10350	-61.6577
10360	-60.8826
10370	-62.0667
10380	-61.2061
10390	-61.8347
10400	-62.1338
10410	-61.3892
10420	-60.7056
10430	-62.1582
10440	-61.9263
10450	-61.9751
10460	-60.553
10470	-61.3281
10480	-61.7371
10490	-61.9019
10500	-61.9385
10510	-61.6821
10520	-61.0168
10530	-61.8835
10540	-61.7493
10550	-61.6516
10560	-61.3892
10570	-61.908
10580	-61.4441
10590	-61.9568
10600	-62.3047
10610	-61.9263
10620	-61.969
10630	-61.2549
10640	-61.5601
10650	-62.2498
10660	-61.4929
10670	-61.6638
10680	-61.7371
10690	-61.8408
10700	-61.3342
10710	-61.7371
10720	-61.4502
10730	-62.0239
10740	-61.7126
10750	-61.1206
10760	-61.499
10770	-62.0728
10780	-61.969
10790	-61.6394
10800	-61.322
10810	-61.1328
10820	-64.1235
10830	-61.8164
10840	-61.3892
10850	-61.7859
10860	-61.908
10870	-61.4624
10880	-61.3342
10890	-61.7981
10900	-61.9385
10910	-61.1206
10920	-61.6028
10930	-61.7798
10940	-61.8713
10950	-61.792
10960	-61.4929
10970	-61.9934
10980	-61.792
10990	-62.0605
11000	-61.2854
11010	-61.853
11020	-61.4136
11030	-61.5784
11040	-61.3586
11050	-62.085
11060	-61.7981
11070	-61.7798
11080	-61.5173
11090	-61.0596
11100	-61.9019
11110	-61.6638
11120	-61.908
11130	-61.3525
11140	-61.7126
11150	-61.7798
11160	-61.6577
11170	-61.4563
11180	-61.6821
11190	-61.3953
11200	-61.6211
11210	-61.4441
11220	-60.4919
11230	-61.7981
11240	-61.9202
11250	-61.4563
11260	-61.3831
11270	-62.1155
11280	-61.5417
11290	-61.3831
11300	-61.7859
11310	-60.8704
11320	-62.0056
11330	-61.4075
11340	-61.1572
11350	-62.4146
11360	-61.5906
11370	-61.9446
11380	-61.7798
11390	-61.5723
11400	-62.0972
11410	-61.3708
11420	-61.853
11430	-61.7554
11440	-61.615
11450	-61.969
11460	-61.0291
11470	-61.6516
11480	-61.8896
11490	-61.6699
11500	-61.1572
11510	-61.969
11520	-61.3586
11530	-61.4258
11540	-61.7371
11550	-61.6516
11560	-61.1694
11570	-61.5784
11580	-61.4685
11590	-61.1206
11600	-61.908
11610	-61.5967
11620	-61.084
11630	-61.8591
11640	-61.7004
11650	-60.6812
11660	-62.0483
11670	-61.4502
11680	-61.6211
11690	-61.5356
11700	-61.853
11710	-60.5713
11720	-61.8958
11730	-61.3281
11740	-61.4014
11750	-61.5784
11760	-61.1389
11770	-61.5295
11780	-61.908
11790	-61.3647
11800	-61.1572
11810	-61.5173
11820	-61.5356
11830	-61.1511
11840	-61.5173
11850	-62.2253
11860	-61.4624
11870	-62.1094
11880	-60.5469
11890	-61.8408
11900	-62.0056
11910	-61.3281
11920	-61.4319
11930	-60.7117
11940	-62.0728
11950	-62.0483
11960	-61.5845
11970	-60.5957
11980	-62.0728
11990	-61.9263
12000	-60.376
12010	-60.7056
12020	-61.554
12030	-61.4319
12040	-61.7371
12050	-61.4807
12060	-61.1633
12070	-61.377
12080	-61.6577
12090	-62.1826
12100	-60.9741
12110	-60.3149
12120	-61.853
12130	-60.675
12140	-62.0178
12150	-62.2681
12160	-60.5164
12170	-61.1816
12180	-61.7004
12190	-61.7432
12200	-60.7544
12210	-61.6455
12220	-61.0596
12230	-61.8774
12240	-60.7727
12250	-61.322
12260	-61.5967
12270	9.82666
12280	-60.5835
12290	-61.4258
12300	-60.9009
12310	-61.6272
12320	-61.3159
12330	-61.4563
12340	-61.3647
12350	-61.6333
12360	-61.4319
12370	-61.4502
12380	-61.7493
12390	-61.8103
12400	-61.3098
12410	-61.6211
12420	-61.2366
12430	-61.7065
12440	-60.1868
12450	-61.9446
12460	-40.8508
12470	-61.3953
12480	-60.9436
12490	-61.6455
12500	-61.4197
12510	-61.4685
12520	-61.2
12530	-62.1338
12540	-61.3892
12550	-62.0544
12560	-61.5601
12570	-61.3647
12580	-61.7065
12590	-60.498
12600	-61.0962
12610	-61.0718
12620	-61.1694
12630	-61.7065
12640	-61.8958
12650	-61.3098
12660	-61.2915
12670	-61.3342
12680	-61.6821
12690	-60.8826
12700	-61.3525
12710	-61.4563
12720	-61.554
12730	-61.4929
12740	-61.0413
12750	-61.3953
12760	-61.4746
12770	-60.9192
12780	-60.7849
12790	-61.4929
12800	-61.6882
12810	-61.7798
12820	-60.7422
12830	-61.6089
12840	-61.554
12850	-61.5967
12860	-61.3586
12870	-61.8408
12880	-61.0474
12890	-61.1389
12900	-61.4685
12910	-61.6577
12920	-61.2427
12930	-61.731
12940	-61.499
12950	-62.1033
12960	-61.1145
12970	-61.6516
12980	-61.5417
12990	-61.084
13000	-61.9019
13010	-61.4868
13020	-61.8408
13030	-61.7737
13040	-61.6333
13050	-62.2009
13060	-61.7981
13070	-61.7554
13080	-61.4075
13090	-61.5601
13100	-61.499
13110	-61.1206
13120	-61.7004
13130	-61.5967
13140	-61.3281
13150	-62.1155
13160	-61.8103
13170	-61.4014
13180	-61.7432
13190	-61.4563
13200	-61.4685
13210	-61.0535
13220	-61.2915
13230	-61.6028
13240	-61.9263
13250	-61.4319
13260	-61.1267
13270	-61.7554
13280	-60.5896
13290	-62.2742
13300	-62.1094
13310	-61.2244
13320	-61.8103
13330	-61.5295
13340	-61.9019
13350	-61.0107
13360	-61.4563
13370	-61.5356
13380	-61.8591
13390	-61.8164
13400	-61.6699
13410	-61.2
13420	-60.9741
13430	-61.8591
13440	-61.7249
13450	-60.2417
13460	-60.4858
13470	-61.6516
13480	-61.2488
13490	-62.2253
13500	-60.9009
13510	-61.6455
13520	-61.6943
13530	-60.675
13540	-61.6516
13550	-61.8103
13560	-61.2732
13570	-61.7981
13580	-61.9812
13590	-61.6821
13600	-61.9019
13610	-61.554
13620	-61.4075
13630	-61.1572
13640	-61.2793
13650	-61.6638
13660	-61.4563
13670	-61.261
13680	-62.0789
13690	-60.5774
13700	-62.1216
13710	-61.6272
13720	-61.2122
13730	-62.0667
13740	-61.1694
13750	-61.3281
13760	-61.7004
13770	-61.8286
13780	-61.4502
13790	-61.3892
13800	-61.8896
13810	-61.4441
13820	-60.7178
13830	-61.7188
13840	-61.7676
13850	-61.322
13860	-62.0544
13870	-60.6262
13880	-61.9202
13890	-61.8469
13900	-61.2732
13910	-60.5652
13920	-60.8398
13930	-61.4197
13940	-62.1826
13950	-61.1816
13960	-61.0413
13970	-61.3525
13980	-61.8835
13990	-61.0474
14000	-61.4746
14010	-61.6394
14020	-61.3953
14030	-60.6628
14040	-62.0422
14050	-61.7432
14060	-61.3647
14070	-61.3831
14080	-61.853
14090	-61.0474
14100	-62.1033
14110	-61.4624
14120	-60.9009
14130	-61.9263
14140	-61.6333
14150	-61.4136
14160	-60.7178
14170	-61.3831
14180	-61.6394
14190	-62.0422
14200	-61.2915
14210	-61.4807
14220	-61.676
14230	-61.2915
14240	-61.6577
14250	-61.8652
14260	-62.0911
14270	-60.8826
14280	-61.4075
14290	-61.6943
14300	-61.4929
14310	-61.2732
14320	-61.1084
14330	-61.2549
14340	-61.438
14350	-61.2915
14360	-61.4075
14370	-61.8835
14380	-61.0596
14390	-61.1328
14400	-61.6272
14410	-60.8521
14420	-61.6699
14430	-61.8774
14440	-59.1919
14450	-61.6943
14460	-61.2488
14470	-61.5051
14480	-61.3403
14490	-61.6821
14500	-61.8896
14510	-60.8826
14520	-61.8164
14530	-61.5723
14540	-61.377
14550	-59.6985
14560	-61.7432
14570	-61.4441
14580	-61.0352
14590	-62.3474
14600	-61.1511
14610	-61.8896
14620	-61.7493
14630	-60.8521
14640	-61.8042
14650	-60.9253
14660	-61.8958
14670	-61.0229
14680	-61.6577
14690	-61.2854
14700	-61.377
14710	-61.4929
14720	-61.2915
14730	-61.084
14740	-61.438
14750	-61.1023
14760	-61.5356
14770	-61.1633
14780	-61.1023
14790	-61.1938
14800	-61.5173
14810	-61.1267
14820	-61.1084
14830	-61.7859
14840	-61.4319
14850	-60.9619
14860	-61.7188
14870	-61.5234
14880	-61.2732
14890	-62.1948
14900	-60.9497
14910	-60.7788
14920	-61.6821
14930	-61.5967
14940	-61.7554
14950	-61.0046
14960	-61.438
14970	-61.4197
14980	-61.145
14990	-61.0229
15000	-62.0972
15010	-61.8164
15020	-60.7666
15030	-61.2549
15040	-61.969
15050	-61.0535
15060	-62.0544
15070	-61.4807
15080	-60.8765
15090	-61.7371
15100	-61.6272
15110	-61.8408
15120	-61.4441
15130	-61.2122
15140	-61.5784
15150	-61.1877
15160	-61.2915
15170	-61.3892
15180	-60.6384
15190	-61.5601
15200	-62.0544
15210	-60.7239
15220	-61.0291
15230	-61.731
15240	-60.7849
15250	-60.8337
15260	-61.2427
15270	-61.9385
15280	-61.5479
15290	-61.3892
15300	-61.792
15310	-61.5051
15320	-61.2122
15330	-61.3647
15340	-61.6333
15350	-61.9019
15360	-61.1206
15370	-61.8469
15380	-61.499
15390	-61.2915
15400	-61.8042
15410	-61.853
15420	-61.0901
15430	-61.4624
15440	-61.8591
15450	-61.6699
15460	-61.3403
15470	-61.0657
15480	-61.1328
15490	-61.7676
15500	-60.5713
15510	-61.8469
15520	-61.1084
15530	-61.0229
15540	-61.969
15550	-60.9192
15560	-61.4502
15570	-61.5295
15580	-60.3577
15590	-61.9446
15600	-61.1389
15610	-60.553
15620	-61.0596
15630	-61.499
15640	-61.5051
15650	-61.3098
15660	-61.1389
15670	-61.8164
15680	-61.1511
15690	-61.615
15700	-61.5234
15710	-61.1145
15720	-61.1511
15730	-61.2122
15740	-60.9741
15750	-60.6689
15760	-61.3647
15770	-60.5347
15780	-61.7859
15790	-61.4014
15800	-61.7126
15810	-61.1572
15820	-61.2915
15830	23.0469
15840	-61.2671
15850	-61.4929
15860	-60.9436
15870	-61.7493
15880	-61.5234
15890	-61.9568
15900	-61.7188
15910	-61.4136
15920	-61.6394
15930	-61.3525
15940	-60.5957
15950	-60.8765
15960	-61.554
15970	-60.6445
15980	-61.2183
15990	-61.2
16000	-61.2854
16010	-61.0352
16020	-60.9863
16030	-60.8521
16040	-61.4075
16050	-61.3403
16060	-61.8713
16070	-61.3098
16080	-61.1633
16090	-61.5295
16100	-60.9619
16110	-61.4441
16120	-61.4624
16130	-61.261
16140	-61.5112
16150	-62.1399
16160	-61.2061
16170	-61.6333
16180	-56.8237
16190	-61.2
16200	-61.4868
16210	-61.615
16220	-61.3708
16230	-61.3525
16240	-60.5713
16250	-61.5417
16260	-61.7249
16270	-61.5173
16280	-61.3831
16290	-62.1521
16300	-61.5723
16310	-61.0535
16320	-61.6272
16330	-61.7615
16340	-60.8154
16350	-61.3708
16360	-60.6079
16370	-62.146
16380	-61.2732
16390	-61.2671
16400	-61.554
16410	-61.1694
16420	-60.7117
16430	-61.6028
16440	-61.6272
16450	-61.5173
16460	-61.9263
16470	-60.6445
16480	-61.438
16490	-61.0474
16500	-60.8398
16510	-61.6577
16520	-61.3281
16530	-61.1938
16540	-61.6089
16550	-61.0535
16560	-61.2427
16570	-61.7249
16580	-61.1206
16590	-61.676
16600	-61.5784
16610	-61.5662
16620	-61.5295
16630	-61.5417
16640	-61.5845
16650	-61.5417
16660	-61.2488
16670	-60.7544
16680	-61.4563
16690	-61.5723
16700	-61.1511
16710	-60.4858
16720	-61.5417
16730	-61.4441
16740	-60.6262
16750	-60.9619
16760	-61.1877
16770	-61.0596
16780	-60.6201
16790	-61.4197
16800	-61.5479
16810	-60.8398
16820	-61.3403
16830	-61.4075
16840	-61.853
16850	-61.8347
16860	-61.5479
16870	-60.9436
16880	-61.6089
16890	-61.4685
16900	-61.8958
16910	-62.03
16920	-61.1389
16930	-60.5957
16940	-61.6394
16950	-61.4197
16960	-61.438
16970	-61.1816
16980	-61.6943
16990	-61.2366
17000	-62.0667
17010	-60.3516
17020	-61.7676
17030	-61.3342
17040	-60.5591
17050	-61.8958
17060	-60.9558
17070	-61.7004
17080	-61.3464
17090	-61.9324
17100	-61.2061
17110	-61.5662
17120	-60.6262
17130	-61.4075
17140	-61.5662
17150	-61.2183
17160	-61.4502
17170	-61.3892
17180	-64.2395
17190	-61.0413
17200	-61.7004
17210	-60.2417
17220	-61.8469
17230	-61.7859
17240	-61.6821
17250	-61.7554
17260	-61.5173
17270	-61.1938
17280	-62.1826
17290	-61.8713
17300	-61.6821
17310	-61.3464
17320	-62.0178
17330	-60.8093
17340	-61.615
17350	-61.6577
17360	-61.4136
17370	-61.2427
17380	-61.0168
17390	-60.968
17400	-60.7422
17410	-61.4563
17420	-61.4319
17430	-61.2366
17440	-62.1704
17450	-61.1084
17460	-61.6516
17470	-59.845
17480	-60.5347
17490	-60.9863
17500	-61.792
17510	-60.8398
17520	-61.499
17530	-61.1267
17540	-61.8042
17550	-61.8164
17560	-61.499
17570	-60.8948
17580	-62.3352
17590	-62.1216
17600	-61.554
17610	-61.3953
17620	-60.9863
17630	-59.4482
17640	-59.9731
17650	-60.675
17660	-61.2793
17670	-61.6821
17680	-61.4685
17690	-61.5417
17700	-80.3406
17710	-61.7615
17720	-61.2915
17730	-61.4136
17740	-61.676
17750	-61.9812
17760	-61.5356
17770	-60.8704
17780	-61.9019
17790	-61.438
17800	-61.2244
17810	-61.0657
17820	-61.7432
17830	-61.9385
17840	-61.1084
17850	-61.1511
17860	-61.3403
17870	-61.1206
17880	-61.2732
17890	-61.2671
17900	-61.0046
17910	-61.3525
17920	-61.4197
17930	-61.3342
17940	-61.0596
17950	-61.9141
17960	-61.8896
17970	-60.5042
17980	-61.6455
17990	-61.6577
18000	-61.9812
18010	-61.438
18020	-62.1033
18030	-61.1084
18040	-61.4685
18050	-61.9629
18060	-60.9558
18070	-61.6821
18080	-61.4685
18090	-62.4451
18100	-61.3708
18110	-61.7981
18120	-60.8582
18130	-61.6699
18140	-62.0972
18150	-61.1694
18160	-61.4746
18170	-61.1206
18180	-61.4563
18190	-61.7249
18200	-60.5957
18210	-61.676
18220	-61.8835
18230	-62.0789
18240	-61.3647
18250	-60.4553
18260	-61.2488
18270	-61.0779
18280	-61.5173
18290	-61.2122
18300	-61.3708
18310	-61.9507
18320	-61.9141
18330	-61.0229
18340	-61.5662
18350	-61.7188
18360	-61.5112
18370	-61.3525
18380	-61.4746
18390	-61.6394
18400	-61.792
18410	-61.1877
18420	-61.4807
18430	-60.0403
18440	-61.1633
18450	-62.1704
18460	-60.7361
18470	-61.2
18480	-61.0901
18490	-61.6272
18500	-61.3098
18510	-61.6394
18520	-61.6028
18530	-62.0117
18540	-61.5601
18550	-61.7615
18560	-61.2732
18570	-60.7971
18580	-61.3831
18590	-61.7371
18600	-61.2549
18610	-60.8704
18620	-62.0117
18630	-61.6455
18640	-61.2183
18650	-61.1877
18660	-61.145
18670	-61.3464
18680	-61.4746
18690	-61.322
18700	-61.4624
18710	-60.8093
18720	-60.9009
18730	-61.9141
18740	-61.0596
18750	-61.969
18760	-61.2305
18770	-61.438
18780	-62.0483
18790	-59.9792
18800	-60.791
18810	-60.9985
18820	-61.1206
18830	-59.9792
18840	-60.4614
18850	-62.262
18860	-61.4746
18870	-61.2732
18880	-61.4014
18890	-61.3159
18900	-61.0962
18910	-61.7554
18920	-61.322
18930	-60.6262
18940	-61.1572
18950	-61.9507
18960	-60.3088
18970	-60.6262
18980	-61.6272
18990	-61.8652
19000	-61.3831
19010	-61.3098
19020	-61.1938
19030	-61.4624
19040	-61.7981
19050	-61.5356
19060	-61.5662
19070	-61.3525
19080	-61.2854
19090	-61.6455
19100	-61.2061
19110	-61.1206
19120	-61.8469
19130	-60.9253
19140	-61.3403
19150	-61.3892
19160	-60.9558
19170	-61.1877
19180	-61.5479
19190	-61.5601
19200	-60.498
19210	-61.2732
19220	-61.8774
19230	-61.2061
19240	-61.3098
19250	-61.7065
19260	-61.1511
19270	-60.8276
19280	-60.8887
19290	-61.2915
19300	-61.499
19310	-60.5286
19320	-61.6638
19330	-80.5725
19340	-61.2366
19350	-61.1206
19360	-61.1877
19370	-61.4868
19380	-61.6272
19390	-61.261
19400	-60.9802
19410	-61.4807
19420	-61.9568
19430	-61.1877
19440	-61.3647
19450	-61.2488
19460	-61.322
19470	-61.145
19480	-61.4624
19490	-61.3403
19500	-61.1328
19510	-61.7554
19520	-61.3892
19530	-61.615
19540	-61.322
19550	-61.377
19560	-61.2366
19570	-61.7493
19580	-61.8591
19590	-61.1511
19600	-61.4868
19610	-60.1807
19620	-61.6333
19630	-61.0352
19640	-62.2925
19650	-61.1389
19660	-61.1633
19670	-61.2122
19680	-61.3159
19690	-60.7849
19700	-60.6262
19710	-61.6882
19720	-60.5408
19730	-61.2305
19740	-60.9436
19750	-61.8591
19760	-60.6934
19770	-61.9873
19780	-60.9924
19790	-61.5173
19800	-60.9985
19810	-61.0291
19820	-61.2488
19830	-61.261
19840	-62.0178
19850	-61.322
19860	-61.0535
19870	-61.1328
19880	-61.9568
19890	-61.3037
19900	-62.0544
19910	-60.321
19920	-59.1614
19930	-60.9436
19940	-61.4136
19950	-61.3525
19960	-60.9741
19970	-61.7676
[truncated: 119,557 more rows]

## Sheet: Figure 1b
Time	MP (mV)	MP (mV)					X (mV)	DV/dt			Mechanical stimulation of the cell body of Spiral ganglion neurons and the corresponding phase plot dV/dt
0	-58.5022	-58.3191					-58.3191	0.610149
0.0499878	-58.6243	-58.2886					-58.2886	-3.0507
0.100006	-58.5632	-58.6243					-58.6243	-1.82941
0.149994	-58.0444	-58.4717					-58.4717	5.79783
0.200012	-58.3801	-58.0444					-58.0444	1.21873
0.25	-58.5937	-58.3496					-58.3496	-4.88417
0.299988	-58.4412	-58.5327					-58.5327	0.303792
0.350006	-58.3191	-58.3191					-58.3191	3.6616
0.399994	-58.2275	-58.1665					-58.1665	-1.82943
0.450012	-58.7158	-58.5022					-58.5022	-3.05072
0.5	-58.5937	-58.4717					-58.4717	0.91622
0.549988	-58.4106	-58.4106					-58.4106	3.05127
0.600006	-58.1665	-58.1665					-58.1665	-1.22276
0.649994	-58.5022	-58.5327					-58.5327	-3.35799
0.700012	-58.5937	-58.5022					-58.5022	2.13633
0.75	-58.5937	-58.3191					-58.3191	3.35781
0.799988	-58.2886	-58.1665					-58.1665	-1.52454
0.850006	-58.136	-58.4717					-58.4717	-3.66105
0.899994	-58.5327	-58.5327					-58.5327	1.52508
0.950012	-58.5327	-58.3191					-58.3191	4.88289
1	-58.5022	-58.0444					-58.0444	-1.5262
1.04999	-58.136	-58.4717					-58.4717	-5.18849
1.10001	-58.4717	-58.5632					-58.5632	0.305854
1.14999	-58.6548	-58.4412					-58.4412	4.27127
1.20001	-58.5327	-58.136					-58.136	-0.917014
1.25	-58.4106	-58.5327					-58.5327	-5.18904
1.29999	-58.2581	-58.6548					-58.6548	-0.610489
1.35001	-58.4412	-58.5937					-58.5937	3.35785
1.39999	-58.5632	-58.3191					-58.3191	2.7471
1.45001	-58.5022	-58.3191					-58.3191	-2.44149
1.5	-58.4106	-58.5632					-58.5632	-2.74655
1.54999	-58.1665	-58.5937					-58.5937	1.52521
1.60001	-58.4106	-58.4106					-58.4106	4.57737
1.64999	-58.5937	-58.136					-58.136	-1.52319
1.70001	-58.5327	-58.5632					-58.5632	-5.18648
1.75	-58.5022	-58.6548					-58.6548	0
1.79999	-58.2886	-58.5632					-58.5632	3.35621
1.85001	-58.2275	-58.3191					-58.3191	2.44002
1.89999	-58.5937	-58.3191					-58.3191	-4.27029
1.95001	-58.6548	-58.7463					-58.7463	-3.05005
2	-58.5327	-58.6243					-58.6243	2.13643
2.04999	-58.3191	-58.5327					-58.5327	3.66109
2.10001	-58.1055	-58.2581					-58.2581	1.82954
2.14999	-58.5632	-58.3496					-58.3496	-4.27102
2.20001	-58.5327	-58.6853					-58.6853	-2.43947
2.25	-58.3191	-58.5937					-58.5937	2.44149
2.29999	-58.2275	-58.4412					-58.4412	2.44094
2.35001	-58.5327	-58.3496					-58.3496	-0.0007328
2.39999	-58.5632	-58.4412					-58.4412	-3.66127
2.45001	-58.1055	-58.7158					-58.7158	-1.82972
2.5	-58.6548	-58.6243					-58.6243	1.52631
2.54999	-58.4106	-58.5632					-58.5632	3.05115
2.60001	-58.2886	-58.3191					-58.3191	1.82978
2.64999	-58.5937	-58.3801					-58.3801	-3.05127
2.70001	-58.136	-58.6243					-58.6243	-2.44102
2.75	-58.4717	-58.6243					-58.6243	0.916183
2.79999	-58.2581	-58.5327					-58.5327	1.83082
2.85001	-58.3496	-58.4412					-58.4412	3.35761
2.89999	-58.4717	-58.197					-58.197	-0.607802
2.95001	-58.136	-58.5022					-58.5022	-4.88215
3	-58.4717	-58.6853					-58.6853	-1.52631
3.04999	-58.0749	-58.6548					-58.6548	2.13533
3.10001	-58.5327	-58.4717					-58.4717	3.662
3.14999	-58.1055	-58.2886					-58.2886	0.917099
3.20001	-58.5937	-58.3801					-58.3801	-3.96724
3.25	-58.2275	-58.6853					-58.6853	-2.44249
3.29999	-58.5632	-58.6243					-58.6243	0.610122
3.35001	-58.4106	-58.6243					-58.6243	1.83173
3.39999	-58.3191	-58.4412					-58.4412	3.662
3.45001	-58.5022	-58.2581					-58.2581	0.610024
3.5	-58.0749	-58.3801					-58.3801	-3.66273
3.54999	-58.5022	-58.6243					-58.6243	-2.13661
3.60001	-57.9834	-58.5937					-58.5937	-0.610489
3.64999	-58.4106	-58.6853					-58.6853	0.913901
3.70001	-58.2886	-58.5022					-58.5022	3.9667
3.75	-58.2581	-58.2886					-58.2886	1.83137
3.79999	-58.4412	-58.3191					-58.3191	-3.66072
3.85001	-58.0139	-58.6548					-58.6548	-4.57715
3.89999	-58.5022	-58.7769					-58.7769	-0.610733
3.95001	-58.3191	-58.7158					-58.7158	1.22088
4	-58.1665	-58.6548					-58.6548	2.13643
4.04999	-58.4412	-58.5022					-58.5022	3.35657
4.10001	-58.0749	-58.3191					-58.3191	0.608779
4.14999	-58.3191	-58.4412					-58.4412	-3.05176
4.20001	-58.3496	-58.6243					-58.6243	-2.74545
4.25	-57.8918	-58.7158					-58.7158	-1.22024
4.29999	-58.3496	-58.7463					-58.7463	0.609573
4.35001	-58.1665	-58.6548					-58.6548	1.831
4.39999	-58.0749	-58.5632					-58.5632	3.05151
4.45001	-58.3801	-58.3496					-58.3496	1.21896
4.5	-58.1055	-58.4412					-58.4412	-2.44149
4.54999	-58.3496	-58.5937					-58.5937	-3.05069
4.60001	-58.3801	-58.7463					-58.7463	-1.52539
4.64999	-57.9529	-58.7463					-58.7463	0
4.70001	-58.3191	-58.7463					-58.7463	0.915183
4.75	-58.4106	-58.6548					-58.6548	1.52631
4.79999	-57.8308	-58.5937					-58.5937	2.44139
4.85001	-58.4412	-58.4106					-58.4106	2.44051
4.89999	-58.3496	-58.3496					-58.3496	-1.22002
4.95001	-57.8613	-58.5327					-58.5327	-3.35657
5	-58.4106	-58.6853					-58.6853	-2.44249
5.04999	-58.3191	-58.7769					-58.7769	-0.610306
5.10001	-57.9224	-58.7463					-58.7463	0.305878
5.14999	-58.4106	-58.7463					-58.7463	0.304878
5.20001	-58.3496	-58.7158					-58.7158	2.44131
5.25	-58.1665	-58.5022					-58.5022	2.74655
5.29999	-58.4412	-58.4412					-58.4412	1.52576
5.35001	-58.2581	-58.3496					-58.3496	0.30539
5.39999	-57.9529	-58.4106					-58.4106	-3.66102
5.45001	-58.3801	-58.7158					-58.7158	-3.35584
5.5	-58.2886	-58.7463					-58.7463	0.610122
5.54999	-57.9224	-58.6548					-58.6548	0.305427
5.60001	-58.2886	-58.7158					-58.7158	0.916855
5.64999	-58.3496	-58.5632					-58.5632	3.96663
5.70001	-57.8003	-58.3191					-58.3191	-0.00146431
5.75	-58.3496	-58.5632					-58.5632	-5.4941
5.79999	-58.3496	-58.8684					-58.8684	-2.74773
5.85001	-57.9224	-58.8379					-58.8379	3.05298
5.89999	-58.3496	-58.5632					-58.5632	2.7481
5.95001	-58.2275	-58.5632					-58.5632	-3.05261
6	-57.9834	-58.8684					-58.8684	-1.52631
6.04999	-58.136	-58.7158					-58.7158	5.18684
6.10001	-58.2886	-58.3496					-58.3496	-0.308052
6.14999	-58.136	-58.7463					-58.7463	-3.35883
6.20001	-57.9834	-58.6853					-58.6853	4.27249
6.25	-58.2886	-58.3191					-58.3191	-0.305061
6.29999	-58.2581	-58.7158					-58.7158	-1.52777
6.35001	-57.8613	-58.4717					-58.4717	2.74515
6.39999	-58.3801	-58.4412					-58.4412	-2.74466
6.45001	-58.3191	-58.7463					-58.7463	0.00183023
6.5	-57.9529	-58.4412					-58.4412	0.610122
6.54999	-58.3191	-58.6853					-58.6853	-2.74637
6.60001	-58.3191	-58.7158					-58.7158	2.74834
6.64999	-58.1055	-58.4106					-58.4106	-0.302436
6.70001	-57.9834	-58.7463					-58.7463	-1.21923
6.75	-58.3801	-58.5327					-58.5327	0.915183
6.79999	-58.2886	-58.6548					-58.6548	-2.13588
6.85001	-57.8308	-58.7463					-58.7463	3.96932
6.89999	-58.197	-58.2581					-58.2581	0.613662
6.95001	-58.3801	-58.6853					-58.6853	-3.66017
7	-58.1055	-58.6243					-58.6243	3.66273
7.04999	-57.9529	-58.3191					-58.3191	-2.13332
7.10001	-58.3496	-58.8379					-58.8379	-3.35419
7.14999	-58.3496	-58.6548					-58.6548	4.57763
7.20001	-58.0444	-58.3801					-58.3801	-1.22289
7.25	-58.136	-58.7769					-58.7769	-2.13643
7.29999	-58.3496	-58.5937					-58.5937	3.96751
7.35001	-58.197	-58.3801					-58.3801	-1.2232
7.39999	-57.8918	-58.7158					-58.7158	-2.74859
7.45001	-58.2886	-58.6548					-58.6548	4.88361
7.5	-58.2275	-58.2275					-58.2275	0
7.54999	-58.0444	-58.6548					-58.6548	-4.27385
7.60001	-57.9834	-58.6548					-58.6548	3.96859
7.64999	-58.3801	-58.2581					-58.2581	0.918807
7.70001	-58.2886	-58.5632					-58.5632	-4.88115
7.75	-57.9834	-58.7463					-58.7463	-0.305061
7.79999	-58.136	-58.5937					-58.5937	3.66145
7.85001	-58.4717	-58.3801					-58.3801	-1.52832
7.89999	-58.2275	-58.7463					-58.7463	-3.35859
7.95001	-58.0444	-58.7158					-58.7158	4.57773
8	-57.9529	-58.2886					-58.2886	0.915183
8.04999	-58.4106	-58.6243					-58.6243	-3.66255
8.10001	-58.2886	-58.6548					-58.6548	1.22173
8.14999	-57.9834	-58.5022					-58.5022	3.66176
8.20001	-57.9834	-58.2886					-58.2886	-2.44277
8.25	-58.3801	-58.7463					-58.7463	-3.96779
8.29999	-58.2581	-58.6853					-58.6853	3.96578
8.35001	-58.0139	-58.3496					-58.3496	1.52393
8.39999	-57.9529	-58.5327					-58.5327	-4.88251
8.45001	-58.3801	-58.8379					-58.8379	-0.914352
8.5	-58.3801	-58.6243					-58.6243	4.27385
8.54999	-58.1665	-58.4106					-58.4106	-1.21823
8.60001	-57.9224	-58.7463					-58.7463	-3.9669
8.64999	-58.3191	-58.8074					-58.8074	1.82978
8.70001	-58.3801	-58.5632					-58.5632	4.57745
8.75	-58.2275	-58.3496					-58.3496	-1.83137
8.79999	-57.8918	-58.7463					-58.7463	-3.35804
8.85001	-58.0139	-58.6853					-58.6853	1.22
8.89999	-58.3496	-58.6243					-58.6243	3.9659
8.95001	-58.2275	-58.2886					-58.2886	-0.307075
9	-58.136	-58.6548					-58.6548	-5.4941
9.04999	-57.8308	-58.8379					-58.8379	-0.00109838
9.10001	-58.3496	-58.6548					-58.6548	5.18861
9.14999	-58.3496	-58.3191					-58.3191	-1.21783
9.20001	-58.2275	-58.7769					-58.7769	-4.88123
9.25	-58.1055	-58.8074					-58.8074	0.306061
9.29999	-57.9834	-58.7463					-58.7463	5.18629
9.35001	-58.2886	-58.2886					-58.2886	1.21683
9.39999	-58.2275	-58.6243					-58.6243	-4.27298
9.45001	-58.1665	-58.7158					-58.7158	0.30661
9.5	-57.8308	-58.5937					-58.5937	3.66273
9.54999	-58.0139	-58.3496					-58.3496	1.52585
9.60001	-58.2581	-58.4412					-58.4412	-3.66273
9.64999	-58.197	-58.7158					-58.7158	-3.05198
9.70001	-58.0749	-58.7463					-58.7463	2.74673
9.75	-57.9834	-58.4412					-58.4412	4.57792
9.79999	-57.9834	-58.2886					-58.2886	-2.74399
9.85001	-58.197	-58.7158					-58.7158	-3.96517
9.89999	-58.2581	-58.6853					-58.6853	0.914878
9.95001	-58.197	-58.6243					-58.6243	4.27249
10	-58.0139	-58.2581					-58.2581	0.611733
10.05	-57.8003	-58.5632					-58.5632	-4.882
10.1	-58.136	-58.7463					-58.7463	-1.526
10.15	-58.197	-58.7158					-58.7158	3.051
10.2	-58.197	-58.4412					-58.4412	4.577
10.25	-57.9834	-58.2581					-58.2581	-0.61
10.3	-57.6782	-58.5022					-58.5022	-3.967
10.35	-57.9834	-58.6548					-58.6548	-1.526
10.4	-58.2581	-58.6548					-58.6548	2.136
10.45	-58.197	-58.4412					-58.4412	3.357
10.5	-57.8918	-58.3191					-58.3191	-2.136
10.55	-57.8308	-58.6548					-58.6548	-4.883
10.6	-58.2581	-58.8074					-58.8074	-5.41789e-14
10.65	-58.1665	-58.6548					-58.6548	3.968
10.7	-57.6782	-58.4106					-58.4106	2.747
10.75	-58.1665	-58.3801					-58.3801	-2.442
10.8	-58.0444	-58.6548					-58.6548	-3.662
10.85	-57.7087	-58.7463					-58.7463	0.305
10.9	-58.1665	-58.6243					-58.6243	2.746
10.95	-57.9224	-58.4717					-58.4717	4.273
11	-57.9224	-58.197					-58.197	-0.915
11.05	-58.2275	-58.5632					-58.5632	-4.273
11.1	-57.7393	-58.6243					-58.6243	-0.611
11.15	-58.1665	-58.6243					-58.6243	0.306
11.2	-57.7698	-58.5937					-58.5937	3.357
11.25	-58.2886	-58.2886					-58.2886	1.831
11.3	-58.1055	-58.4106					-58.4106	-4.577
11.35	-58.136	-58.7463					-58.7463	-3.968
11.4	-58.1055	-58.8074					-58.8074	-0.306
11.45	-58.0139	-58.7769					-58.7769	3.357
11.5	-58.2275	-58.4717					-58.4717	4.578
11.55	-57.9224	-58.3191					-58.3191	-1.526
11.6	-58.2275	-58.6243					-58.6243	-3.967
11.65	-57.6477	-58.7158					-58.7158	-1.831
11.7	-58.3801	-58.8074					-58.8074	0.915
11.75	-57.8308	-58.6243					-58.6243	3.968
11.8	-58.197	-58.4106					-58.4106	1.831
11.85	-58.136	-58.4412					-58.4412	-1.526
11.9	-58.136	-58.5632					-58.5632	-2.746
11.95	-58.2581	-58.7158					-58.7158	-2.137
12	-57.8308	-58.7769					-58.7769	-0.611
12.05	-58.197	-58.7769					-58.7769	2.137
12.1	-57.8613	-58.5632					-58.5632	4.883
12.15	-58.2275	-58.2886					-58.2886	1.831
12.2	-58.1665	-58.3801					-58.3801	-3.662
12.25	-57.8613	-58.6548					-58.6548	-3.357
12.3	-58.197	-58.7158					-58.7158	-0.61
12.35	-58.0139	-58.7158					-58.7158	1.221
12.4	-58.2275	-58.5937					-58.5937	2.746
12.45	-58.2275	-58.4412					-58.4412	2.136
12.5	-57.7698	-58.3801					-58.3801	0.611
12.55	-58.3191	-58.3801					-58.3801	-2.747
12.6	-58.1665	-58.6548					-58.6548	-3.052
12.65	-57.8918	-58.6853					-58.6853	-0.915
12.7	-58.2581	-58.7463					-58.7463	-2.16493e-14
12.75	-57.8918	-58.6853					-58.6853	2.441
12.8	-58.0139	-58.5022					-58.5022	3.357
12.85	-58.197	-58.3496					-58.3496	2.136
12.9	-57.7393	-58.2886					-58.2886	-0.305
12.95	-58.1055	-58.3801					-58.3801	-3.662
13	-58.2275	-58.6548					-58.6548	-3.052
13.05	-57.8003	-58.6853					-58.6853	1.831
13.1	-58.2275	-58.4717					-58.4717	0.305
13.15	-58.1665	-58.6548					-58.6548	6.50591e-14
13.2	-57.9529	-58.4717					-58.4717	3.357
13.25	-58.3496	-58.3191					-58.3191	2.747
13.3	-58.0749	-58.197					-58.197	-0.61
13.35	-57.8003	-58.3801					-58.3801	-3.967
13.4	-58.3191	-58.5937					-58.5937	-2.442
13.45	-58.1055	-58.6243					-58.6243	-0.306
13.5	-57.8918	-58.6243					-58.6243	0.916
13.55	-58.2275	-58.5327					-58.5327	0.916
13.6	-57.9834	-58.5327					-58.5327	1.526
13.65	-57.9834	-58.3801					-58.3801	2.136
13.7	-58.2275	-58.3191					-58.3191	3.052
13.75	-58.136	-58.0749					-58.0749	0.61
13.8	-57.9224	-58.2581					-58.2581	-3.052
13.85	-58.3191	-58.3801					-58.3801	-2.746
13.9	-58.136	-58.5327					-58.5327	-1.221
13.95	-57.9224	-58.5022					-58.5022	0.305
14	-58.3496	-58.5022					-58.5022	1.831
14.05	-58.1665	-58.3191					-58.3191	3.967
14.1	-57.8918	-58.1055					-58.1055	-0.61
14.15	-58.3801	-58.3801					-58.3801	-3.357
14.2	-58.1665	-58.4412					-58.4412	0.915
14.25	-57.7087	-58.2886					-58.2886	3.663
14.3	-58.2581	-58.0749					-58.0749	-1.526
14.35	-58.2275	-58.4412					-58.4412	-3.663
14.4	-57.8918	-58.4412					-58.4412	3.357
14.45	-58.2275	-58.1055					-58.1055	1.221
14.5	-58.3496	-58.3191					-58.3191	-2.746
14.55	-58.0139	-58.3801					-58.3801	3.052
14.6	-58.136	-58.0139					-58.0139	-0.305
14.65	-58.3801	-58.4106					-58.4106	-3.662
14.7	-58.1055	-58.3801					-58.3801	3.662
14.75	-58.0139	-58.0444					-58.0444	-0.611
14.8	-58.4106	-58.4412					-58.4412	-0.611
14.85	-58.2275	-58.1055					-58.1055	1.831
14.9	-57.8003	-58.2581					-58.2581	-2.441
14.95	-58.3801	-58.3496					-58.3496	4.273
15	-58.3191	-57.8308					-57.8308	-0.61
15.05	-58.0139	-58.4106					-58.4106	-4.883
15.1	-58.1055	-58.3191					-58.3191	2.441
15.15	-58.4412	-58.1665					-58.1665	-5.41789e-14
15.2	-58.2886	-58.3191					-58.3191	1.831
15.25	-57.9834	-57.9834					-57.9834	0
15.3	-58.3801	-58.3191					-58.3191	-3.662
15.35	-58.3496	-58.3496					-58.3496	4.273
15.4	-57.9834	-57.8918					-57.8918	0.305
15.45	-58.2275	-58.3191					-58.3191	-3.663
15.5	-58.4412	-58.2581					-58.2581	3.967
15.55	-58.2275	-57.9224					-57.9224	-0.305
15.6	-57.9224	-58.2886					-58.2886	-3.662
15.65	-58.2886	-58.2886					-58.2886	3.968
15.7	-58.3496	-57.8918					-57.8918	-1.22
15.75	-58.136	-58.4106					-58.4106	-4.273
15.8	-58.1055	-58.3191					-58.3191	3.967
15.85	-58.4717	-58.0139					-58.0139	0.305
15.9	-58.3496	-58.2886					-58.2886	-3.967
15.95	-58.0139	-58.4106					-58.4106	0.611
16	-58.197	-58.2275					-58.2275	3.051
16.05	-58.4717	-58.1055					-58.1055	-1.831
16.1	-58.3801	-58.4106					-58.4106	-2.136
16.15	-57.8613	-58.3191					-58.3191	5.188
16.2	-58.2275	-57.8918					-57.8918	0
16.25	-58.4412	-58.3191					-58.3191	-4.883
16.3	-58.2886	-58.3801					-58.3801	1.831
16.35	-58.0444	-58.136					-58.136	2.441
16.4	-58.2886	-58.136					-58.136	-2.746
16.45	-58.5327	-58.4106					-58.4106	-2.441
16.5	-58.3496	-58.3801					-58.3801	4.577
16.55	-57.9834	-57.9529					-57.9529	0.61
16.6	-58.2886	-58.3191					-58.3191	-5.798
16.65	-58.4106	-58.5327					-58.5327	-1.51434e-13
16.7	-58.3801	-58.3191					-58.3191	5.798
16.75	-57.9834	-57.9529					-57.9529	-0.305
16.8	-58.1665	-58.3496					-58.3496	-4.272
16.85	-58.4106	-58.3801					-58.3801	2.136
16.9	-58.4106	-58.136					-58.136	2.746
16.95	-58.1055	-58.1055					-58.1055	-2.136
17	-58.1665	-58.3496					-58.3496	-3.051
17.05	-58.3496	-58.4106					-58.4106	2.441
17.1	-58.4106	-58.1055					-58.1055	3.051
17.15	-58.3191	-58.1055					-58.1055	-3.967
17.2	-58.0444	-58.5022					-58.5022	-3.051
17.25	-58.4106	-58.4106					-58.4106	2.747
17.3	-58.5327	-58.2275					-58.2275	3.662
17.35	-58.3801	-58.0444					-58.0444	-1.526
17.4	-58.1055	-58.3801					-58.3801	-3.662
17.45	-58.2275	-58.4106					-58.4106	2.746
17.5	-58.3496	-58.1055					-58.1055	3.357
17.55	-58.3801	-58.0749					-58.0749	-2.746
17.6	-58.1665	-58.3801					-58.3801	-2.137
17.65	-58.0139	-58.2886					-58.2886	1.831
17.7	-58.3191	-58.197					-58.197	1.526
17.75	-58.5937	-58.136					-58.136	-2.442
17.8	-58.4717	-58.4412					-58.4412	-3.052
17.85	-58.197	-58.4412					-58.4412	0.916
17.9	-58.0444	-58.3496					-58.3496	3.052
17.95	-58.4412	-58.136					-58.136	0.305
18	-58.5937	-58.3191					-58.3191	-3.357
18.05	-58.4717	-58.4717					-58.4717	-0.61
18.1	-58.2275	-58.3801					-58.3801	3.662
18.15	-58.0749	-58.1055					-58.1055	1.22
18.2	-58.3801	-58.2581					-58.2581	-3.051
18.25	-58.5022	-58.4106					-58.4106	-0.61
18.3	-58.4412	-58.3191					-58.3191	2.441
18.35	-58.2275	-58.1665					-58.1665	3.052
18.4	-58.0444	-58.0139					-58.0139	-1.221
18.45	-58.3191	-58.2886					-58.2886	-4.578
18.5	-58.5327	-58.4717					-58.4717	-0.915
18.55	-58.5022	-58.3801					-58.3801	2.747
18.6	-58.3191	-58.197					-58.197	3.662
18.65	-58.0749	-58.0139					-58.0139	-2.136
18.7	-58.2581	-58.4106					-58.4106	-4.578
18.75	-58.5327	-58.4717					-58.4717	0.915
18.8	-58.3801	-58.3191					-58.3191	3.968
18.85	-58.2581	-58.0749					-58.0749	2.442
18.9	-58.0749	-58.0749					-58.0749	-2.747
18.95	-58.4717	-58.3496					-58.3496	-3.357
19	-58.3496	-58.4106					-58.4106	0.915
19.05	-58.0444	-58.2581					-58.2581	2.746
19.1	-58.5632	-58.136					-58.136	2.137
19.15	-58.3801	-58.0444					-58.0444	-2.136
19.2	-58.0749	-58.3496					-58.3496	-3.968
19.25	-58.4717	-58.4412					-58.4412	0.915
19.3	-58.136	-58.2581					-58.2581	3.663
19.35	-58.3191	-58.0749					-58.0749	3.663
19.4	-58.3801	-57.8918					-57.8918	1.30118e-13
19.45	-57.9834	-58.0749					-58.0749	-3.052
19.5	-58.2886	-58.197					-58.197	1.22
19.55	-57.8613	-57.9529					-57.9529	3.967
19.6	-58.2886	-57.8003					-57.8003	5.188
19.65	-57.8308	-57.4341					-57.4341	3.357
19.7	-58.136	-57.4646					-57.4646	-1.831
19.75	-57.9224	-57.6172					-57.6172	-0.61
19.8	-57.8003	-57.5256					-57.5256	1.221
19.85	-57.8003	-57.4951					-57.4951	4.272
19.9	-57.5561	-57.0984					-57.0984	6.409
19.95	-57.7698	-56.8542					-56.8542	2.136
20	-57.0984	-56.8848					-56.8848	-1.221
20.05	-57.4646	-56.9763					-56.9763	0.611
20.1	-56.9153	-56.8237					-56.8237	2.746
20.15	-57.251	-56.7017					-56.7017	4.577
20.2	-56.9763	-56.366					-56.366	7.019
20.25	-56.9153	-55.9998					-55.9998	3.968
20.3	-56.9153	-55.9692					-55.9692	-1.22
20.35	-56.5491	-56.1218					-56.1218	-0.611
20.4	-56.8542	-56.0303					-56.0303	3.357
20.45	-56.3965	-55.7861					-55.7861	3.357
20.5	-56.5796	-55.6946					-55.6946	3.662
20.55	-56.488	-55.4199					-55.4199	6.104
20.6	-56.0913	-55.0842					-55.0842	2.746
20.65	-56.3049	-55.1453					-55.1453	-1.831
20.7	-55.9082	-55.2673					-55.2673	0.306
20.75	-55.8472	-55.1147					-55.1147	3.662
20.8	-55.9082	-54.9011					-54.9011	4.577
20.85	-55.4504	-54.657					-54.657	5.493
20.9	-55.7251	-54.3518					-54.3518	5.188
20.95	-55.5115	-54.1382					-54.1382	2.441
21	-55.1758	-54.1077					-54.1077	-1.221
21.05	-55.5115	-54.2603					-54.2603	-0.305
21.1	-55.1147	-54.1382					-54.1382	2.747
21.15	-55.0537	-53.9856					-53.9856	2.747
21.2	-55.2063	-53.8635					-53.8635	4.273
21.25	-54.8096	-53.5583					-53.5583	6.408
21.3	-54.8096	-53.2227					-53.2227	3.967
21.35	-54.8706	-53.1616					-53.1616	-4.34097e-14
21.4	-54.3823	-53.2227					-53.2227	-0.916
21.45	-54.6265	-53.2532					-53.2532	1.221
21.5	-54.5959	-53.1006					-53.1006	3.357
21.55	-53.9551	-52.9175					-52.9175	3.052
21.6	-54.2603	-52.7954					-52.7954	3.357
21.65	-54.1992	-52.5818					-52.5818	4.883
21.7	-53.6804	-52.3071					-52.3071	5.188
21.75	-54.1077	-52.063					-52.063	1.22
21.8	-53.9246	-52.1851					-52.1851	-0.61
21.85	-53.5583	-52.124					-52.124	0.306
21.9	-53.9856	-52.1545					-52.1545	0.915
21.95	-53.6194	-52.0325					-52.0325	2.136
22	-53.2532	-51.9409					-51.9409	3.052
22.05	-53.6804	-51.7273					-51.7273	3.662
22.1	-53.4363	-51.5747					-51.5747	4.578
22.15	-53.009	-51.2695					-51.2695	5.798
22.2	-53.3142	-50.9949					-50.9949	2.441
22.25	-53.1616	-51.0254					-51.0254	-0.61
22.3	-52.8259	-51.0559					-51.0559	-0.305
22.35	-53.1311	-51.0559					-51.0559	1.831
22.4	-53.0701	-50.8728					-50.8728	4.578
22.45	-52.5818	-50.5981					-50.5981	5.493
22.5	-52.948	-50.3235					-50.3235	0.305
22.55	-52.887	-50.5676					-50.5676	-1.221
22.6	-52.3987	-50.4456					-50.4456	3.967
22.65	-52.5207	-50.1709					-50.1709	5.188
22.7	-52.7039	-49.9268					-49.9268	0
22.75	-52.3376	-50.1709					-50.1709	0.611
22.8	-52.3682	-49.8657					-49.8657	6.104
22.85	-52.4902	-49.5605					-49.5605	0.61
22.9	-52.2156	-49.8047					-49.8047	1.22
22.95	-52.0325	-49.4385					-49.4385	4.273
23	-52.3987	-49.3774					-49.3774	0.305
23.05	-52.2156	-49.408					-49.408	3.662
23.1	-51.8188	-49.0112					-49.0112	1.221
23.15	-52.2461	-49.2859					-49.2859	-0.611
23.2	-52.3376	-49.0723					-49.0723	5.798
23.25	-51.8188	-48.7061					-48.7061	0.916
23.3	-52.0325	-48.9807					-48.9807	1.221
23.35	-52.124	-48.584					-48.584	4.272
23.4	-51.9409	-48.5535					-48.5535	2.16493e-14
23.45	-51.6968	-48.584					-48.584	5.188
23.5	-52.0019	-48.0347					-48.0347	2.747
23.55	-51.8799	-48.3093					-48.3093	0
23.6	-51.6052	-48.0347					-48.0347	6.103
23.65	-51.7883	-47.699					-47.699	2.137
23.7	-51.9104	-47.821					-47.821	1.831
23.75	-51.6357	-47.5159					-47.5159	5.188
23.8	-51.5137	-47.3022					-47.3022	0.916
23.85	-51.9409	-47.4243					-47.4243	3.662
23.9	-51.7883	-46.936					-46.936	6.103
23.95	-51.5442	-46.814					-46.814	0
24	-51.6968	-46.936					-46.936	4.273
24.05	-51.9104	-46.3867					-46.3867	9.46
24.1	-51.8494	-45.99					-45.99	1.831
24.15	-51.4526	-46.2036					-46.2036	2.136
24.2	-51.7883	-45.7764					-45.7764	9.46
24.25	-51.9409	-45.2576					-45.2576	5.188
24.3	-51.7883	-45.2576					-45.2576	4.273
24.35	-51.5442	-44.8303					-44.8303	11.292
24.4	-51.9714	-44.1284					-44.1284	9.155
24.45	-52.0325	-43.9148					-43.9148	5.188
24.5	-51.9104	-43.6096					-43.6096	12.207
24.55	-51.6663	-42.6941					-42.6941	18.005
24.6	-52.0325	-41.8091					-41.8091	14.954
24.65	-52.124	-41.1987					-41.1987	22.278
24.7	-51.8799	-39.5813					-39.5813	43.945
24.75	-51.8494	-36.8042					-36.8042	67.444
24.8	-52.1851	-32.8369					-32.8369	105.591
24.85	-52.2156	-26.2451					-26.2451	162.353
24.9	-52.0019	-16.6016					-16.6016	218.811
24.95	-52.0019	-4.36401					-4.36401	251.77
25	-52.3987	8.57544					8.57544	263.977
25.05	-52.4292	22.0337					22.0337	262.146
25.1	-52.4597	34.79					34.79	235.29
25.15	-52.2461	45.5627					45.5627	180.97
25.2	-52.6733	52.887					52.887	116.272
25.25	-52.8259	57.1899					57.1899	52.795
25.3	-52.7649	58.1665					58.1665	-10.681
25.35	-52.5207	56.1218					56.1218	-79.346
25.4	-52.7954	50.2319					50.2319	-137.329
25.45	-53.1006	42.3889					42.3889	-171.203
25.5	-53.1006	33.1116					33.1116	-193.786
25.55	-52.9175	23.0103					23.0103	-212.097
25.6	-52.887	11.9019					11.9019	-220.032
25.65	-53.3447	1.00708					1.00708	-212.708
25.7	-53.4058	-9.3689					-9.3689	-198.67
25.75	-53.4668	-18.8599					-18.8599	-187.073
25.8	-53.1311	-28.0762					-28.0762	-180.969
25.85	-53.4058	-36.9568					-36.9568	-166.626
25.9	-53.772	-44.7388					-44.7388	-147.4
25.95	-53.8635	-51.6968					-51.6968	-129.394
26	-53.772	-57.6782					-57.6782	-120.544
26.05	-53.5889	-63.7512					-63.7512	-112.61
26.1	-53.894	-68.9392					-68.9392	-92.468
26.15	-54.1992	-72.998					-72.998	-73.547
26.2	-54.1992	-76.2939					-76.2939	-59.815
26.25	-54.1077	-78.9795					-78.9795	-52.491
26.3	-54.0161	-81.543					-81.543	-42.724
26.35	-54.4128	-83.2519					-83.2519	-28.686
26.4	-54.718	-84.4116					-84.4116	-17.701
26.45	-54.779	-85.022					-85.022	-8.545
26.5	-54.6265	-85.2661					-85.2661	-8.239
26.55	-54.5349	-85.8459					-85.8459	-8.24
26.6	-55.0232	-86.0901					-86.0901	1.831
26.65	-55.2063	-85.6628					-85.6628	7.324
26.7	-55.1758	-85.3577					-85.3577	9.155
26.75	-55.1147	-84.7473					-84.7473	9.461
26.8	-54.9316	-84.4116					-84.4116	4.578
26.85	-55.1758	-84.2895					-84.2895	6.103
26.9	-55.542	-83.8013					-83.8013	10.07
26.95	-55.6641	-83.2825					-83.2825	10.682
27	-55.542	-82.7331					-82.7331	11.597
27.05	-55.5725	-82.1228					-82.1228	9.155
27.1	-55.7251	-81.8176					-81.8176	4.578
27.15	-56.0303	-81.665					-81.665	4.272
27.2	-56.0303	-81.3904					-81.3904	7.019
27.25	-55.8166	-80.9631					-80.9631	10.071
27.3	-56.0608	-80.3833					-80.3833	11.596
27.35	-56.3049	-79.8035					-79.8035	7.935
27.4	-56.1218	-79.5898					-79.5898	3.663
27.45	-56.2134	-79.4372					-79.4372	3.357
27.5	-56.5491	-79.2541					-79.2541	6.408
27.55	-56.2439	-78.7964					-78.7964	8.544
27.6	-56.6711	-78.3997					-78.3997	8.545
27.65	-56.7627	-77.9419					-77.9419	9.156
27.7	-56.6101	-77.4841					-77.4841	4.273
27.75	-57.0373	-77.5146					-77.5146	1.22
27.8	-56.7017	-77.3621					-77.3621	3.662
27.85	-57.2205	-77.1484					-77.1484	4.578
27.9	-57.0373	-76.9043					-76.9043	7.629
27.95	-57.3425	-76.3855					-76.3855	9.461
28	-57.2815	-75.9582					-75.9582	6.104
28.05	-57.1899	-75.7751					-75.7751	2.441
28.1	-57.4646	-75.7141					-75.7141	1.22
28.15	-57.1899	-75.6531					-75.6531	3.967
28.2	-57.6782	-75.3174					-75.3174	6.104
28.25	-57.1899	-75.0427					-75.0427	6.409
28.3	-57.6782	-74.6765					-74.6765	7.629
28.35	-57.4036	-74.2798					-74.2798	6.103
28.4	-57.9529	-74.0662					-74.0662	2.747
28.45	-57.6782	-74.0051					-74.0051	-0.305
28.5	-58.0139	-74.0967					-74.0967	1.526
28.55	-58.1055	-73.8525					-73.8525	6.104
28.6	-57.9529	-73.4863					-73.4863	6.408
28.65	-58.1055	-73.2117					-73.2117	6.408
28.7	-57.7087	-72.8455					-72.8455	7.325
28.75	-58.2581	-72.4792					-72.4792	3.968
28.8	-58.0749	-72.4487					-72.4487	0.305
28.85	-58.136	-72.4487					-72.4487	1.526
28.9	-58.3496	-72.2961					-72.2961	2.746
28.95	-57.9529	-72.1741					-72.1741	4.577
29	-58.5632	-71.8384					-71.8384	5.188
29.05	-58.5022	-71.6553					-71.6553	5.188
29.1	-58.197	-71.3196					-71.3196	6.104
29.15	-58.6243	-71.0449					-71.0449	3.357
29.2	-58.4717	-70.9839					-70.9839	2.136
29.25	-58.6548	-70.8313					-70.8313	0.305
29.3	-58.7463	-70.9534					-70.9534	-0.61
29.35	-58.2886	-70.8923					-70.8923	3.357
29.4	-58.8074	-70.6177					-70.6177	5.493
29.45	-58.7158	-70.343					-70.343	5.188
29.5	-58.5327	-70.0989					-70.0989	5.188
29.55	-58.8989	-69.8242					-69.8242	5.493
29.6	-58.6853	-69.5496					-69.5496	3.662
29.65	-58.7769	-69.458					-69.458	2.442
29.7	-59.0515	-69.3054					-69.3054	1.526
29.75	-58.7769	-69.3054					-69.3054	-0.916
29.8	-58.8989	-69.397					-69.397	0.915
29.85	-59.2346	-69.2139					-69.2139	3.662
29.9	-58.9294	-69.0308					-69.0308	3.663
29.95	-59.0515	-68.8476					-68.8476	3.663
30	-59.2346	-68.6645					-68.6645	4.272
30.05	-58.8989	-68.4204					-68.4204	4.577
30.1	-59.2346	-68.2068					-68.2068	4.883
30.15	-59.2957	-67.9321					-67.9321	3.357
30.2	-58.96	-67.8711					-67.8711	1.526
30.25	-59.2651	-67.7795					-67.7795	0.305
30.3	-59.3262	-67.8406					-67.8406	-0.916
30.35	-58.9905	-67.8711					-67.8711	0.916
30.4	-59.2957	-67.749					-67.749	3.052
30.45	-59.4482	-67.5659					-67.5659	3.052
30.5	-59.1431	-67.4438					-67.4438	3.052
30.55	-59.5398	-67.2607					-67.2607	4.272
30.6	-59.5093	-67.0166					-67.0166	4.882
30.65	-59.1125	-66.7725					-66.7725	3.357
30.7	-59.3872	-66.6809					-66.6809	-0.305
30.75	-59.5093	-66.803					-66.803	-0.916
30.8	-59.2957	-66.7725					-66.7725	2.747
30.85	-59.3262	-66.5283					-66.5283	6.409
30.9	-59.5703	-66.1316					-66.1316	3.357
30.95	-59.4482	-66.1926					-66.1926	-2.136
31	-59.3262	-66.3452					-66.3452	0.305
31.05	-59.6924	-66.1621					-66.1621	6.409
31.1	-59.5093	-65.7043					-65.7043	1.526
31.15	-59.3872	-66.0095					-66.0095	-1.526
31.2	-59.906	-65.8569					-65.8569	5.493
31.25	-59.7229	-65.4602					-65.4602	0.915
31.3	-59.2346	-65.7654					-65.7654	-2.441
31.35	-59.7534	-65.7043					-65.7043	6.104
31.4	-59.7839	-65.155					-65.155	1.525
31.45	-59.5703	-65.5518					-65.5518	-0.916
31.5	-59.5398	-65.2466					-65.2466	6.714
31.55	-59.7534	-64.8804					-64.8804	0
31.6	-59.6313	-65.2466					-65.2466	2.60236e-13
31.65	-59.3872	-64.8804					-64.8804	4.883
31.7	-59.967	-64.7583					-64.7583	-1.526
31.75	-59.7839	-65.033					-65.033	1.526
31.8	-59.6008	-64.6057					-64.6057	2.442
31.85	-59.8144	-64.7888					-64.7888	-2.441
31.9	-59.845	-64.8498					-64.8498	5.798
31.95	-59.6313	-64.209					-64.209	1.831
32	-59.5703	-64.6667					-64.6667	-3.357
32.05	-59.9365	-64.5447					-64.5447	6.713
32.1	-59.906	-63.9954					-63.9954	1.221
32.15	-59.5398	-64.4226					-64.4226	-3.356
32.2	-59.6619	-64.331					-64.331	6.409
32.25	-59.9976	-63.7817					-63.7817	2.441
32.3	-59.8144	-64.0869					-64.0869	-3.052
32.35	-59.4788	-64.0869					-64.0869	2.746
32.4	-59.9365	-63.8123					-63.8123	3.052
32.45	-60.0281	-63.7817					-63.7817	-2.136
32.5	-59.7839	-64.0259					-64.0259	0
32.55	-59.6313	-63.7817					-63.7817	5.493
32.6	-59.9976	-63.4766					-63.4766	-0.306
32.65	-59.9976	-63.8123					-63.8123	-1.525
32.7	-59.6924	-63.6291					-63.6291	4.883
32.75	-59.7839	-63.324					-63.324	3.051
32.8	-59.9976	-63.324					-63.324	-2.136
32.85	-59.906	-63.5376					-63.5376	-0.305
32.9	-59.6313	-63.3545					-63.3545	7.629
32.95	-59.7534	-62.7747					-62.7747	2.136
33	-60.0281	-63.1409					-63.1409	-5.188
33.05	-59.9976	-63.2935					-63.2935	-2.16938e-13
33.1	-59.7229	-63.1409					-63.1409	6.409
33.15	-59.8755	-62.6526					-62.6526	0.611
33.2	-60.0586	-63.0798					-63.0798	-4.883
33.25	-59.9976	-63.1409					-63.1409	1.526
33.3	-59.7839	-62.9272					-62.9272	5.799
33.35	-59.7839	-62.561					-62.561	-5.20473e-13
33.4	-60.0586	-62.9272					-62.9272	-3.357
33.45	-59.9976	-62.8967					-62.8967	2.136
33.5	-59.7229	-62.7136					-62.7136	4.883
33.55	-59.6619	-62.4084					-62.4084	-0.611
33.6	-60.0281	-62.7747					-62.7747	-2.747
33.65	-59.9365	-62.6831					-62.6831	1.832
33.7	-59.7839	-62.5915					-62.5915	4.272
33.75	-59.6313	-62.2559					-62.2559	0
33.8	-59.9976	-62.5915					-62.5915	-3.356
33.85	-59.967	-62.5915					-62.5915	0.915
33.9	-59.906	-62.5					-62.5	5.493
33.95	-59.6924	-62.0422					-62.0422	1.221
34	-59.7839	-62.3779					-62.3779	-4.578
34.05	-60.0281	-62.5					-62.5	0.915
34.1	-59.906	-62.2864					-62.2864	5.188
34.15	-59.6924	-61.9812					-61.9812	2.136
34.2	-59.6313	-62.0728					-62.0728	-3.052
34.25	-59.906	-62.2864					-62.2864	-0.305
34.3	-60.0586	-62.1033					-62.1033	3.662
34.35	-59.8755	-61.9202					-61.9202	3.357
34.4	-59.845	-61.7676					-61.7676	-0.61
34.45	-59.6008	-61.9812					-61.9812	-2.441
34.5	-59.967	-62.0117					-62.0117	0.305
34.55	-60.0281	-61.9507					-61.9507	3.357
34.6	-59.9976	-61.676					-61.676	2.442
34.65	-59.7839	-61.7065					-61.7065	-2.747
34.7	-59.6619	-61.9507					-61.9507	-0.916
34.75	-59.9365	-61.7981					-61.7981	3.662
34.8	-59.9365	-61.5845					-61.5845	4.578
34.85	-59.845	-61.3403					-61.3403	-0.305
34.9	-59.6924	-61.615					-61.615	-2.137
34.95	-59.6008	-61.554					-61.554	-8.65974e-14
35	-59.7839	-61.615					-61.615	2.747
35.05	-60.0586	-61.2793					-61.2793	5.188
35.1	-59.906	-61.0962					-61.0962	-1.831
35.15	-59.7534	-61.4624					-61.4624	-3.967
35.2	-59.4482	-61.4929					-61.4929	-0.305
35.25	-59.6924	-61.4929					-61.4929	4.577
35.3	-59.967	-61.0352					-61.0352	5.188
35.35	-59.7839	-60.9741					-60.9741	-2.746
35.4	-59.6313	-61.3098					-61.3098	-2.747
35.45	-59.3567	-61.2488					-61.2488	1.526
35.5	-59.6619	-61.1572					-61.1572	3.968
35.55	-59.8144	-60.852					-60.852	5.493
35.6	-59.6008	-60.6079					-60.6079	-0.916
35.65	-59.3567	-60.9436					-60.9436	-3.967
35.7	-59.8755	-61.0046					-61.0046	8.65974e-14
35.75	-59.7229	-60.9436					-60.9436	1.831
35.8	-59.3262	-60.8215					-60.8215	4.578
35.85	-59.8144	-60.4858					-60.4858	1.831
35.9	-59.5398	-60.6384					-60.6384	-2.747
35.95	-59.6008	-60.7605					-60.7605	-1.831
36	-59.6924	-60.8215					-60.8215	0.305
36.05	-59.2041	-60.73					-60.73	3.967
36.1	-59.845	-60.4248					-60.4248	4.578
36.15	-59.3872	-60.2722					-60.2722	0.61
36.2	-59.6313	-60.3638					-60.3638	-2.442
36.25	-59.6008	-60.5164					-60.5164	-0.915
36.3	-59.4177	-60.4553					-60.4553	1.832
36.35	-59.7229	-60.3332					-60.3332	3.052
36.4	-59.3262	-60.1501					-60.1501	4.272
36.45	-59.6619	-59.906					-59.906	-0.916
36.5	-59.1736	-60.2417					-60.2417	-4.883
36.55	-59.7534	-60.3943					-60.3943	0.305
36.6	-59.2957	-60.2112					-60.2112	2.442
36.65	-59.6924	-60.1501					-60.1501	2.136
36.7	-59.3567	-59.9976					-59.9976	3.051
36.75	-59.5398	-59.845					-59.845	1.221
36.8	-59.5093	-59.8755					-59.8755	-2.136
36.85	-59.2957	-60.0586					-60.0586	-2.746
36.9	-59.5093	-60.1501					-60.1501	0.61
36.95	-59.0515	-59.9976					-59.9976	1.525
37	-59.6313	-59.9976					-59.9976	2.747
37.05	-59.3567	-59.7229					-59.7229	4.273
37.1	-59.3262	-59.5703					-59.5703	-1.526
37.15	-59.4177	-59.8755					-59.8755	-4.578
37.2	-59.1431	-60.0281					-60.0281	-1.221
37.25	-59.5093	-59.9976					-59.9976	0.611
37.3	-59.2651	-59.967					-59.967	0.916
37.35	-59.2346	-59.906					-59.906	2.746
37.4	-59.3567	-59.6924					-59.6924	4.272
37.45	-59.0515	-59.4788					-59.4788	1.831
37.5	-59.4177	-59.5093					-59.5093	-1.831
37.55	-59.3262	-59.6619					-59.6619	-3.357
37.6	-58.8989	-59.845					-59.845	-0.915
37.65	-59.4482	-59.7534					-59.7534	1.526
37.7	-59.2957	-59.6924					-59.6924	2.441
37.75	-59.1125	-59.5093					-59.5093	2.136
37.8	-59.3872	-59.4788					-59.4788	3.052
37.85	-59.2346	-59.2041					-59.2041	1.831
37.9	-59.2346	-59.2957					-59.2957	-2.747
37.95	-59.3872	-59.4788					-59.4788	-3.967
38	-58.9294	-59.6924					-59.6924	-1.525
38.05	-59.3262	-59.6313					-59.6313	2.136
38.1	-59.2957	-59.4788					-59.4788	2.136
38.15	-58.8684	-59.4177					-59.4177	1.221
38.2	-59.2651	-59.3567					-59.3567	2.746
38.25	-59.2041	-59.1431					-59.1431	2.136
38.3	-58.8379	-59.1431					-59.1431	-0.305
38.35	-59.2651	-59.1736					-59.1736	-0.915
38.4	-59.1736	-59.2346					-59.2346	-3.967
38.45	-58.8074	-59.5703					-59.5703	-2.747
38.5	-59.2651	-59.5093					-59.5093	1.526
38.55	-59.2957	-59.4177					-59.4177	0.916
38.6	-58.8684	-59.4177					-59.4177	0.915
38.65	-59.2957	-59.3262					-59.3262	1.22
38.7	-59.2346	-59.2957					-59.2957	2.137
38.75	-58.7769	-59.1125					-59.1125	3.052
38.8	-59.2651	-58.9905					-58.9905	1.73195e-13
38.85	-59.1736	-59.1125					-59.1125	-2.746
38.9	-58.8074	-59.2651					-59.2651	-2.137
38.95	-59.2041	-59.3262					-59.3262	-0.916
39	-59.2041	-59.3567					-59.3567	2.747
39.05	-58.7463	-59.0515					-59.0515	4.273
39.1	-59.1736	-58.9294					-58.9294	-1.73639e-13
39.15	-59.1736	-59.0515					-59.0515	-4.273
39.2	-58.96	-59.3567					-59.3567	-2.442
39.25	-59.021	-59.2957					-59.2957	4.273
39.3	-59.1431	-58.9294					-58.9294	1.221
39.35	-58.8684	-59.1736					-59.1736	-3.663
39.4	-58.7769	-59.2957					-59.2957	1.526
39.45	-59.1736	-59.021					-59.021	2.747
39.5	-58.8684	-59.021					-59.021	-1.831
39.55	-58.6243	-59.2041					-59.2041	0.61
39.6	-59.082	-58.96					-58.96	2.441
39.65	-59.082	-58.96					-58.96	-1.525
39.7	-58.6243	-59.1125					-59.1125	1.526
39.75	-58.9905	-58.8074					-58.8074	0.305
39.8	-59.1125	-59.082					-59.082	-2.441
39.85	-58.9294	-59.0515					-59.0515	3.662
39.9	-58.7769	-58.7158					-58.7158	-1.221
39.95	-59.1125	-59.1736					-59.1736	-1.831
40	-58.9294	-58.8989					-58.8989	3.662
40.05	-58.5327	-58.8074					-58.8074	-0.611
40.1	-58.9905	-58.96					-58.96	2.137
40.15	-58.9294	-58.5937					-58.5937	0.916
40.2	-58.6243	-58.8684					-58.8684	-3.663
40.25	-58.7769	-58.96					-58.96	4.578
40.3	-58.9905	-58.4106					-58.4106	1.221
40.35	-58.8684	-58.8379					-58.8379	-4.578
40.4	-58.5327	-58.8684					-58.8684	3.052
40.45	-58.9905	-58.5327					-58.5327	0.305
40.5	-58.96	-58.8379					-58.8379	-2.747
40.55	-58.6853	-58.8074					-58.8074	4.273
40.6	-58.6548	-58.4106					-58.4106	-0.915
40.65	-58.9905	-58.8989					-58.8989	-3.357
40.7	-58.8684	-58.7463					-58.7463	5.188
40.75	-58.5937	-58.3801					-58.3801	0.915
40.8	-58.7769	-58.6548					-58.6548	-3.052
40.85	-58.8684	-58.6853					-58.6853	1.831
40.9	-58.7769	-58.4717					-58.4717	2.747
40.95	-58.3496	-58.4106					-58.4106	-2.136
41	-58.8074	-58.6853					-58.6853	-3.052
41.05	-58.8379	-58.7158					-58.7158	3.662
41.1	-58.7463	-58.3191					-58.3191	0.915
41.15	-58.4106	-58.6243					-58.6243	-3.052
41.2	-58.8074	-58.6243					-58.6243	1.221
41.25	-58.8379	-58.5022					-58.5022	2.442
41.3	-58.7463	-58.3801					-58.3801	-1.831
41.35	-58.4412	-58.6853					-58.6853	-1.831
41.4	-58.7769	-58.5632					-58.5632	5.188
41.45	-58.7769	-58.1665					-58.1665	1.22
41.5	-58.5632	-58.4412					-58.4412	-4.883
41.55	-58.3191	-58.6548					-58.6548	0.916
41.6	-58.6548	-58.3496					-58.3496	6.104
41.65	-58.7769	-58.0444					-58.0444	-1.831
41.7	-58.6548	-58.5327					-58.5327	-4.273
41.75	-58.2886	-58.4717					-58.4717	1.831
41.8	-58.6243	-58.3496					-58.3496	3.052
41.85	-58.7158	-58.1665					-58.1665	-1.526
41.9	-58.6548	-58.5022					-58.5022	-3.967
41.95	-58.3496	-58.5632					-58.5632	2.136
42	-58.3801	-58.2886					-58.2886	5.188
42.05	-58.6548	-58.0444					-58.0444	-2.441
42.1	-58.7158	-58.5327					-58.5327	-4.273
42.15	-58.4106	-58.4717					-58.4717	1.831
42.2	-58.2275	-58.3496					-58.3496	4.578
42.25	-58.5632	-58.0139					-58.0139	-0.305
42.3	-58.6243	-58.3801					-58.3801	-4.578
42.35	-58.5937	-58.4717					-58.4717	0.915
42.4	-58.3496	-58.2886					-58.2886	4.578
42.45	-58.3801	-58.0139					-58.0139	-3.90354e-13
42.5	-58.5632	-58.2886					-58.2886	-4.883
42.55	-58.5937	-58.5022					-58.5022	-1.526
42.6	-58.3496	-58.4412					-58.4412	4.883
42.65	-58.1055	-58.0139					-58.0139	1.526
42.7	-58.3191	-58.2886					-58.2886	-5.493
42.75	-58.5022	-58.5632					-58.5632	-1.831
42.8	-58.4106	-58.4717					-58.4717	3.967
42.85	-58.2886	-58.1665					-58.1665	4.273
42.9	-57.9224	-58.0444					-58.0444	-2.441
42.95	-58.2275	-58.4106					-58.4106	-4.273
43	-58.4106	-58.4717					-58.4717	1.22
43.05	-58.4717	-58.2886					-58.2886	4.883
43.1	-58.197	-57.9834					-57.9834	0.305
43.15	-57.8918	-58.2581					-58.2581	-4.883
43.2	-58.136	-58.4717					-58.4717	-1.831
43.25	-58.3496	-58.4412					-58.4412	5.188
43.3	-58.2886	-57.9529					-57.9529	2.137
43.35	-58.2275	-58.2275					-58.2275	-5.493
43.4	-57.8918	-58.5022					-58.5022	-1.526
43.45	-57.8918	-58.3801					-58.3801	3.357
43.5	-58.2581	-58.1665					-58.1665	3.357
43.55	-58.3191	-58.0444					-58.0444	-2.136
43.6	-58.2275	-58.3801					-58.3801	-3.052
43.65	-57.9834	-58.3496					-58.3496	3.052
43.7	-58.0444	-58.0749					-58.0749	3.052
43.75	-58.3496	-58.0444					-58.0444	-3.052
43.8	-58.2275	-58.3801					-58.3801	-3.662
43.85	-58.1665	-58.4106					-58.4106	1.22
43.9	-57.9529	-58.2581					-58.2581	4.882
43.95	-58.3191	-57.9224					-57.9224	-1.525
44	-58.2581	-58.4106					-58.4106	-4.272
44.05	-57.8613	-58.3496					-58.3496	1.22
44.1	-58.0749	-58.2886					-58.2886	4.272
44.15	-58.2275	-57.9224					-57.9224	1.221
44.2	-57.8613	-58.1665					-58.1665	-4.882
44.25	-58.3191	-58.4106					-58.4106	-0.61
44.3	-58.0444	-58.2275					-58.2275	3.967
44.35	-58.1055	-58.0139					-58.0139	2.136
44.4	-58.2886	-58.0139					-58.0139	-2.442
44.45	-57.8003	-58.2581					-58.2581	-4.578
44.5	-58.3191	-58.4717					-58.4717	-0.305
44.55	-57.8613	-58.2886					-58.2886	3.968
44.6	-58.2581	-58.0749					-58.0749	1.831
44.65	-57.9529	-58.1055					-58.1055	-3.663
44.7	-58.136	-58.4412					-58.4412	-4.272
44.75	-58.0139	-58.5327					-58.5327	0.306
44.8	-57.9834	-58.4106					-58.4106	3.967
44.85	-58.2275	-58.136					-58.136	3.662
44.9	-57.8918	-58.0444					-58.0444	-2.441
44.95	-58.1055	-58.3801					-58.3801	-4.883
45	-57.8308	-58.5327					-58.5327	0
45.05	-58.2275	-58.3801					-58.3801	3.357
45.1	-57.7087	-58.197					-58.197	3.052
45.15	-58.2275	-58.0749					-58.0749	-1.221
45.2	-58.0139	-58.3191					-58.3191	-3.968
45.25	-58.0139	-58.4717					-58.4717	-0.915
45.3	-58.136	-58.4106					-58.4106	0.305
45.35	-57.6782	-58.4412					-58.4412	0.61
45.4	-58.136	-58.3496					-58.3496	2.442
45.45	-57.8003	-58.197					-58.197	-0.61
45.5	-58.0139	-58.4106					-58.4106	-3.662
45.55	-58.0749	-58.5632					-58.5632	-0.916
45.6	-57.5867	-58.5022					-58.5022	1.526
45.65	-58.2275	-58.4106					-58.4106	3.357
45.7	-57.8613	-58.1665					-58.1665	3.051
45.75	-58.0139	-58.1055					-58.1055	-2.441
45.8	-58.136	-58.4106					-58.4106	-4.272
45.85	-57.7698	-58.5327					-58.5327	-0.306
45.9	-58.2275	-58.4412					-58.4412	0.61
45.95	-58.0139	-58.4717					-58.4717	0.916
46	-57.6477	-58.3496					-58.3496	3.357
46.05	-58.136	-58.136					-58.136	1.526
46.1	-57.9224	-58.197					-58.197	-2.746
46.15	-57.8613	-58.4106					-58.4106	-3.357
46.2	-58.0444	-58.5327					-58.5327	-0.611
46.25	-57.7087	-58.4717					-58.4717	0.61
46.3	-58.0749	-58.4717					-58.4717	1.831
46.35	-58.0749	-58.2886					-58.2886	3.662
46.4	-57.6477	-58.1055					-58.1055	0.916
46.45	-58.0749	-58.197					-58.197	-3.357
46.5	-58.0749	-58.4412					-58.4412	-3.052
46.55	-57.6172	-58.5022					-58.5022	-0.61
46.6	-58.136	-58.5022					-58.5022	-0.915
46.65	-58.0444	-58.5937					-58.5937	0.305
46.7	-57.6172	-58.4717					-58.4717	2.746
46.75	-58.136	-58.3191					-58.3191	3.662
46.8	-58.0749	-58.1055					-58.1055	0.61
46.85	-57.7087	-58.2581					-58.2581	-4.272
46.9	-58.0749	-58.5327					-58.5327	-3.051
46.95	-58.1055	-58.5632					-58.5632	4.32987e-14
47	-57.6477	-58.5327					-58.5327	1.22
47.05	-58.197	-58.4412					-58.4412	0.61
47.1	-58.0749	-58.4717					-58.4717	0.611
47.15	-57.8003	-58.3801					-58.3801	2.747
47.2	-58.2275	-58.197					-58.197	-0.305
47.25	-58.0749	-58.4106					-58.4106	-4.273
47.3	-57.6477	-58.6243					-58.6243	-2.747
47.35	-58.136	-58.6853					-58.6853	2.137
47.4	-58.0444	-58.4106					-58.4106	4.883
47.45	-57.7393	-58.197					-58.197	-0.916
47.5	-58.0139	-58.5022					-58.5022	-3.967
47.55	-58.0139	-58.5937					-58.5937	0.61
47.6	-57.7698	-58.4412					-58.4412	4.272
47.65	-58.0139	-58.1665					-58.1665	-1.831
47.7	-58.0749	-58.6243					-58.6243	-3.967
47.75	-57.7698	-58.5632					-58.5632	3.662
47.8	-57.9834	-58.2581					-58.2581	-0.916
47.85	-58.2275	-58.6548					-58.6548	-1.831
47.9	-57.8918	-58.4412					-58.4412	2.442
47.95	-57.7087	-58.4106					-58.4106	-3.051
48	-58.197	-58.7463					-58.7463	2.441
48.05	-58.0139	-58.1665					-58.1665	1.526
48.1	-57.6477	-58.5937					-58.5937	-4.578
48.15	-58.0749	-58.6243					-58.6243	2.441
48.2	-58.0139	-58.3496					-58.3496	-0.61
48.25	-57.7393	-58.6853					-58.6853	1.221
48.3	-57.9834	-58.2275					-58.2275	0.61
48.35	-58.1055	-58.6243					-58.6243	-4.273
48.4	-57.9224	-58.6548					-58.6548	2.442
48.45	-57.7698	-58.3801					-58.3801	-0.61
48.5	-58.197	-58.7158					-58.7158	0
48.55	-58.0444	-58.3801					-58.3801	0.61
48.6	-57.7393	-58.6548					-58.6548	-3.662
48.65	-57.9834	-58.7463					-58.7463	3.662
48.7	-58.197	-58.2886					-58.2886	-6.50147e-13
48.75	-58.0139	-58.7463					-58.7463	-2.746
48.8	-57.7087	-58.5632					-58.5632	3.662
48.85	-58.1055	-58.3801					-58.3801	-1.831
48.9	-58.1055	-58.7463					-58.7463	-1.221
48.95	-57.8613	-58.5022					-58.5022	3.357
49	-57.8613	-58.4106					-58.4106	-1.831
49.05	-58.2275	-58.6853					-58.6853	-1.221
49.1	-58.136	-58.5327					-58.5327	1.831
49.15	-57.8918	-58.5022					-58.5022	-1.831
49.2	-58.0139	-58.7158					-58.7158	-0.61
49.25	-58.197	-58.5632					-58.5632	2.441
49.3	-58.197	-58.4717					-58.4717	-2.137
49.35	-57.7087	-58.7769					-58.7769	-2.136
49.4	-58.2581	-58.6853					-58.6853	4.883
49.45	-58.197	-58.2886					-58.2886	-1.221
49.5	-57.9834	-58.8074					-58.8074	-4.272
49.55	-57.8918	-58.7158					-58.7158	5.493
49.6	-58.1055	-58.2581					-58.2581	0.915
49.65	-58.1665	-58.6243					-58.6243	-3.967
49.7	-57.9834	-58.6548					-58.6548	2.137
49.75	-57.9834	-58.4106					-58.4106	1.221
49.8	-58.3191	-58.5327					-58.5327	-3.357
49.85	-58.1665	-58.7463					-58.7463	-2.136
49.9	-58.0749	-58.7463					-58.7463	3.662
49.95	-57.8918	-58.3801					-58.3801	-0.916
50	-58.2886	-58.8379					-58.8379	-4.273
50.05	-58.2581	-58.8074					-58.8074	2.136
50.1	-58.0749	-58.6243					-58.6243	0.916
50.15	-57.7393	-58.7158					-58.7158	-1.831
50.2	-58.197	-58.8074					-58.8074	-0.305
50.25	-58.2275	-58.7463					-58.7463	3.662
50.3	-58.1665	-58.4412					-58.4412	4.33875e-13
50.35	-57.8613	-58.7463					-58.7463	-4.272
50.4	-58.1665	-58.8684					-58.8684	1.22
50.45	-58.3801	-58.6243					-58.6243	5.188
50.5	-58.136	-58.3496					-58.3496	-3.051
50.55	-58.0444	-58.9294					-58.9294	-5.188
50.6	-57.9224	-58.8684					-58.8684	3.357
50.65	-58.2581	-58.5937					-58.5937	2.441
50.7	-58.2886	-58.6243					-58.6243	-3.357
50.75	-58.0749	-58.9294					-58.9294	-3.051
50.8	-57.8613	-58.9294					-58.9294	4.882
50.85	-58.1055	-58.4412					-58.4412	2.746
50.9	-58.2581	-58.6548					-58.6548	-5.188
50.95	-58.2275	-58.96					-58.96	-1.526
51	-58.1055	-58.8074					-58.8074	4.883
51.05	-57.8918	-58.4717					-58.4717	0.305
51.1	-58.2581	-58.7769					-58.7769	-3.662
51.15	-58.2886	-58.8379					-58.8379	-0.305
51.2	-58.2581	-58.8074					-58.8074	3.662
51.25	-58.136	-58.4717					-58.4717	0.305
51.3	-57.9529	-58.7769					-58.7769	-5.188
51.35	-58.2275	-58.9905					-58.9905	-1.525
51.4	-58.2886	-58.9294					-58.9294	3.662
51.45	-58.1665	-58.6243					-58.6243	1.831
51.5	-58.0444	-58.7463					-58.7463	-3.662
51.55	-57.8308	-58.9905					-58.9905	-0.916
51.6	-58.136	-58.8379					-58.8379	3.968
51.65	-58.3191	-58.5937					-58.5937	1.526
51.7	-58.3191	-58.6853					-58.6853	-3.663
51.75	-58.1665	-58.96					-58.96	-2.136
51.8	-57.8308	-58.8989					-58.8989	1.831
51.85	-58.0749	-58.7769					-58.7769	3.967
51.9	-58.3191	-58.5022					-58.5022	-1.525
51.95	-58.2886	-58.9294					-58.9294	-4.272
52	-58.1055	-58.9294					-58.9294	0
52.05	-57.7698	-58.9294					-58.9294	2.746
52.1	-57.9834	-58.6548					-58.6548	1.525
52.15	-58.3191	-58.7769					-58.7769	-3.662
52.2	-58.197	-59.021					-59.021	-1.831
52.25	-57.8003	-58.96					-58.96	2.136
52.3	-58.0749	-58.8074					-58.8074	3.357
52.35	-58.2581	-58.6243					-58.6243	-1.22
52.4	-58.0444	-58.9294					-58.9294	-2.746
52.45	-58.0444	-58.8989					-58.8989	-0.916
52.5	-58.2581	-59.021					-59.021	1.526
52.55	-57.8613	-58.7463					-58.7463	3.662
52.6	-58.2275	-58.6548					-58.6548	-2.747
52.65	-58.1055	-59.021					-59.021	-3.967
52.7	-57.8918	-59.0515					-59.0515	0.61
52.75	-58.2275	-58.96					-58.96	3.967
52.8	-57.7393	-58.6548					-58.6548	3.357
52.85	-58.2275	-58.6243					-58.6243	-3.357
52.9	-57.8918	-58.9905					-58.9905	-2.746
52.95	-58.197	-58.8989					-58.8989	0.916
53	-58.1055	-58.8989					-58.8989	2.746
53.05	-58.136	-58.6243					-58.6243	4.272
53.1	-58.2275	-58.4717					-58.4717	-2.136
53.15	-57.9834	-58.8379					-58.8379	-4.883
53.2	-58.3191	-58.96					-58.96	0.305
53.25	-57.8918	-58.8074					-58.8074	3.052
53.3	-58.3191	-58.6548					-58.6548	3.357
53.35	-57.8003	-58.4717					-58.4717	-1.526
53.4	-58.2886	-58.8074					-58.8074	-5.188
53.45	-58.0444	-58.9905					-58.9905	-0.305
53.5	-58.1665	-58.8379					-58.8379	2.136
53.55	-58.1665	-58.7769					-58.7769	2.747
53.6	-57.9529	-58.5632					-58.5632	3.357
53.65	-58.3191	-58.4412					-58.4412	-2.137
53.7	-57.8918	-58.7769					-58.7769	-3.967
53.75	-58.3496	-58.8379					-58.8379	-0.305
53.8	-58.136	-58.8074					-58.8074	1.221
53.85	-58.0749	-58.7158					-58.7158	2.442
53.9	-58.3496	-58.5632					-58.5632	2.136
53.95	-57.8918	-58.5022					-58.5022	-1.526
54	-58.3801	-58.7158					-58.7158	-4.272
54.05	-58.1665	-58.9294					-58.9294	-0.916
54.1	-57.9224	-58.8074					-58.8074	1.525
54.15	-58.4106	-58.7769					-58.7769	2.442
54.2	-58.136	-58.5632					-58.5632	3.968
54.25	-58.197	-58.3801					-58.3801	0.305
54.3	-58.4412	-58.5327					-58.5327	-3.662
54.35	-58.0444	-58.7463					-58.7463	-2.136
54.4	-58.3801	-58.7463					-58.7463	-0.306
54.45	-58.3496	-58.7769					-58.7769	0.915
54.5	-57.9834	-58.6548					-58.6548	2.747
54.55	-58.4717	-58.5022					-58.5022	3.052
54.6	-58.2275	-58.3496					-58.3496	-0.915
54.65	-58.0444	-58.5937					-58.5937	-4.883
54.7	-58.4412	-58.8379					-58.8379	-1.526
54.75	-58.2581	-58.7463					-58.7463	1.831
54.8	-58.197	-58.6548					-58.6548	0.61
54.85	-58.4412	-58.6853					-58.6853	2.136
54.9	-58.1665	-58.4412					-58.4412	4.272
54.95	-58.3496	-58.2581					-58.2581	0.611
55	-58.4412	-58.3801					-58.3801	-3.051
55.05	-58.1055	-58.5632					-58.5632	-3.052
55.1	-58.3191	-58.6853					-58.6853	-1.221
55.15	-58.4412	-58.6853					-58.6853	1.221
55.2	-58.2581	-58.5632					-58.5632	0.916
55.25	-58.2275	-58.5937					-58.5937	0.915
55.3	-58.4106	-58.4717					-58.4717	1.831
55.35	-58.1055	-58.4106					-58.4106	1.831
55.4	-58.3191	-58.2886					-58.2886	-1.526
55.45	-58.3496	-58.5632					-58.5632	-3.662
55.5	-58.0749	-58.6548					-58.6548	-0.916
55.55	-58.136	-58.6548					-58.6548	0
55.6	-58.5327	-58.6548					-58.6548	1.831
55.65	-58.1665	-58.4717					-58.4717	3.967
55.7	-58.1665	-58.2581					-58.2581	-0.61
55.75	-58.4412	-58.5327					-58.5327	-3.967
55.8	-58.3191	-58.6548					-58.6548	-1.221
55.85	-58.1665	-58.6548					-58.6548	3.662
55.9	-58.4412	-58.2886					-58.2886	-0.305
55.95	-58.2886	-58.6853					-58.6853	-4.577
56	-58.0444	-58.7463					-58.7463	2.747
56.05	-58.4106	-58.4106					-58.4106	1.831
56.1	-58.4106	-58.5632					-58.5632	-3.052
56.15	-57.8918	-58.7158					-58.7158	2.136
56.2	-58.3801	-58.3496					-58.3496	0.915
56.25	-58.4412	-58.6243					-58.6243	-3.967
56.3	-57.9834	-58.7463					-58.7463	3.662
56.35	-58.2275	-58.2581					-58.2581	-6.93667e-13
56.4	-58.5327	-58.7463					-58.7463	-1.831
56.45	-58.2886	-58.4412					-58.4412	1.22
56.5	-58.197	-58.6243					-58.6243	-3.051
56.55	-58.4717	-58.7463					-58.7463	2.442
56.6	-58.4717	-58.3801					-58.3801	-0.916
56.65	-58.0139	-58.8379					-58.8379	-1.526
56.7	-58.4106	-58.5327					-58.5327	1.831
56.75	-58.4412	-58.6548					-58.6548	-2.442
56.8	-58.2275	-58.7769					-58.7769	3.357
56.85	-58.1665	-58.3191					-58.3191	-0.305
56.9	-58.5632	-58.8074					-58.8074	-2.441
56.95	-58.4412	-58.5632					-58.5632	3.357
57	-58.0749	-58.4717					-58.4717	-1.831
57.05	-58.4412	-58.7463					-58.7463	1.221
57.1	-58.5632	-58.3496					-58.3496	0.915
57.15	-58.3801	-58.6548					-58.6548	-3.052
57.2	-58.1665	-58.6548					-58.6548	2.442
57.25	-58.5632	-58.4106					-58.4106	-1.831
57.3	-58.5022	-58.8379					-58.8379	-3.968
57.35	-58.136	-58.8074					-58.8074	4.578
57.4	-58.3496	-58.3801					-58.3801	6.06626e-13
57.45	-58.4106	-58.8074					-58.8074	-4.273
57.5	-58.3191	-58.8074					-58.8074	4.273
57.55	-57.9834	-58.3801					-58.3801	1.221
57.6	-58.3496	-58.6853					-58.6853	-3.357
57.65	-58.4106	-58.7158					-58.7158	2.441
57.7	-58.2886	-58.4412					-58.4412	1.526
57.75	-58.136	-58.5632					-58.5632	-3.051
57.8	-58.4717	-58.7463					-58.7463	0.61
57.85	-58.4412	-58.5022					-58.5022	2.136
57.9	-58.3191	-58.5327					-58.5327	-3.662
57.95	-58.0749	-58.8684					-58.8684	-1.831
58	-58.4412	-58.7158					-58.7158	4.578
58.05	-58.4717	-58.4106					-58.4106	-0.305
58.1	-58.2886	-58.7463					-58.7463	-4.273
58.15	-58.0444	-58.8379					-58.8379	1.831
58.2	-58.5022	-58.5632					-58.5632	2.747
58.25	-58.5022	-58.5632					-58.5632	-2.137
58.3	-58.3191	-58.7769					-58.7769	0.305
58.35	-58.136	-58.5327					-58.5327	4.578
58.4	-58.4412	-58.3191					-58.3191	-2.136
58.45	-58.5937	-58.7463					-58.7463	-3.357
58.5	-58.4106	-58.6548					-58.6548	2.746
58.55	-58.0444	-58.4717					-58.4717	0.916
58.6	-58.3496	-58.5632					-58.5632	-3.357
58.65	-58.5022	-58.8074					-58.8074	-1.831
58.7	-58.4717	-58.7463					-58.7463	3.662
58.75	-58.1665	-58.4412					-58.4412	-0.306
58.8	-58.136	-58.7769					-58.7769	-3.051
58.85	-58.5022	-58.7463					-58.7463	1.832
58.9	-58.4717	-58.5937					-58.5937	3.967
58.95	-58.3496	-58.3496					-58.3496	-2.137
59	-58.1055	-58.8074					-58.8074	-4.578
59.05	-58.4412	-58.8074					-58.8074	2.442
59.1	-58.6853	-58.5632					-58.5632	3.662
59.15	-58.4717	-58.4412					-58.4412	-3.357
59.2	-58.2886	-58.8989					-58.8989	-3.357
59.25	-58.2275	-58.7769					-58.7769	3.357
59.3	-58.5022	-58.5632					-58.5632	2.442
59.35	-58.5937	-58.5327					-58.5327	-3.968
59.4	-58.4412	-58.96					-58.96	-4.273
59.45	-58.2886	-58.96					-58.96	3.663
59.5	-58.2275	-58.5937					-58.5937	3.968
59.55	-58.6548	-58.5632					-58.5632	-3.357
59.6	-58.5632	-58.9294					-58.9294	-2.137
59.65	-58.5022	-58.7769					-58.7769	3.357
59.7	-58.3801	-58.5937					-58.5937	2.442
59.75	-58.3191	-58.5327					-58.5327	-2.442
59.8	-58.5022	-58.8379					-58.8379	-3.052
59.85	-58.6243	-58.8379					-58.8379	2.136
59.9	-58.5327	-58.6243					-58.6243	3.662
59.95	-58.3191	-58.4717					-58.4717	-1.526
60	-58.3191	-58.7769					-58.7769	-4.272
60.05	-58.4717	-58.8989					-58.8989	-1.73195e-13
60.1	-58.5632	-58.7769					-58.7769	3.967
60.15	-58.5632	-58.5022					-58.5022	0.611
60.2	-58.4412	-58.7158					-58.7158	-4.578
60.25	-58.136	-58.96					-58.96	-0.611
60.3	-58.3191	-58.7769					-58.7769	3.663
60.35	-58.7158	-58.5937					-58.5937	1.526
60.4	-58.6243	-58.6243					-58.6243	-2.747
60.45	-58.4106	-58.8684					-58.8684	-2.441
60.5	-58.2581	-58.8684					-58.8684	1.221
60.55	-58.6243	-58.7463					-58.7463	3.662
60.6	-58.5937	-58.5022					-58.5022	-0.611
60.65	-58.3801	-58.8074					-58.8074	-4.883
60.7	-58.3496	-58.9905					-58.9905	-1.831
60.75	-58.6243	-58.9905					-58.9905	2.747
60.8	-58.4106	-58.7158					-58.7158	4.578
60.85	-58.5022	-58.5327					-58.5327	-2.136
60.9	-58.5632	-58.9294					-58.9294	-3.967
60.95	-58.0749	-58.9294					-58.9294	0
61	-58.6548	-58.9294					-58.9294	2.441
61.05	-58.4717	-58.6853					-58.6853	3.357
61.1	-58.4717	-58.5937					-58.5937	-2.747
61.15	-58.5327	-58.96					-58.96	-4.273
61.2	-58.3496	-59.021					-59.021	0.306
61.25	-58.6243	-58.9294					-58.9294	2.747
61.3	-58.136	-58.7463					-58.7463	2.746
61.35	-58.6548	-58.6548					-58.6548	-2.747
61.4	-58.2581	-59.021					-59.021	-3.967
61.45	-58.6243	-59.0515					-59.0515	0.61
61.5	-58.3191	-58.96					-58.96	2.746
61.55	-58.5327	-58.7769					-58.7769	4.273
61.6	-58.4106	-58.5327					-58.5327	-3.47278e-13
61.65	-58.4412	-58.7769					-58.7769	-3.967
61.7	-58.5937	-58.9294					-58.9294	-0.305
61.75	-58.1665	-58.8074					-58.8074	0.61
61.8	-58.6243	-58.8684					-58.8684	1.526
61.85	-58.136	-58.6548					-58.6548	2.441
61.9	-58.7158	-58.6243					-58.6243	-1.831
61.95	-58.4106	-58.8379					-58.8379	-4.272
62	-58.4412	-59.0515					-59.0515	-1.526
62.05	-58.5937	-58.9905					-58.9905	2.746
62.1	-58.0749	-58.7769					-58.7769	3.662
62.15	-58.5632	-58.6243					-58.6243	1.526
62.2	-58.2275	-58.6243					-58.6243	-2.136
62.25	-58.3801	-58.8379					-58.8379	-3.357
62.3	-58.5632	-58.96					-58.96	-1.73639e-13
62.35	-58.1055	-58.8379					-58.8379	1.526
62.4	-58.5632	-58.8074					-58.8074	1.526
62.45	-58.2886	-58.6853					-58.6853	2.137
62.5	-58.2886	-58.5937					-58.5937	-1.831
62.55	-58.5632	-58.8684					-58.8684	-4.578
62.6	-58.136	-59.0515					-59.0515	-1.831
62.65	-58.4717	-59.0515					-59.0515	0
62.7	-58.5022	-59.0515					-59.0515	2.746
62.75	-57.9834	-58.7769					-58.7769	3.967
62.8	-58.5632	-58.6548					-58.6548	0.611
62.85	-58.2886	-58.7158					-58.7158	-3.052
62.9	-58.0139	-58.96					-58.96	-4.273
62.95	-58.5327	-59.1431					-59.1431	-0.61
63	-58.2886	-59.021					-59.021	1.831
63.05	-58.1055	-58.96					-58.96	1.526
63.1	-58.5327	-58.8684					-58.8684	2.747
63.15	-58.197	-58.6853					-58.6853	1.221
63.2	-58.3496	-58.7463					-58.7463	-1.221
63.25	-58.3801	-58.8074					-58.8074	-3.662
63.3	-58.136	-59.1125					-59.1125	-3.357
63.35	-58.3496	-59.1431					-59.1431	0.915
63.4	-58.4717	-59.021					-59.021	1.831
63.45	-58.0444	-58.96					-58.96	1.526
63.5	-58.2886	-58.8684					-58.8684	2.747
63.55	-58.3496	-58.6853					-58.6853	2.441
63.6	-58.1055	-58.6243					-58.6243	-1.221
63.65	-58.3496	-58.8074					-58.8074	-3.662
63.7	-58.4717	-58.9905					-58.9905	-2.136
63.75	-58.0749	-59.021					-59.021	0.305
63.8	-58.3801	-58.96					-58.96	0.61
63.85	-58.5632	-58.96					-58.96	1.831
63.9	-58.0444	-58.7769					-58.7769	2.747
63.95	-58.3801	-58.6853					-58.6853	-1.22
64	-58.4717	-58.8989					-58.8989	-4.272
64.05	-58.136	-59.1125					-59.1125	-1.221
64.1	-58.2275	-59.021					-59.021	3.051
64.15	-58.4106	-58.8074					-58.8074	3.052
64.2	-58.197	-58.7158					-58.7158	-2.746
64.25	-58.136	-59.082					-59.082	-2.442
64.3	-58.5327	-58.96					-58.96	5.798
64.35	-58.2886	-58.5022					-58.5022	0.611
64.4	-58.1055	-58.8989					-58.8989	-5.493
64.45	-58.5327	-59.0515					-59.0515	3.357
64.5	-58.5937	-58.5632					-58.5632	0.61
64.55	-58.0444	-58.9905					-58.9905	-4.273
64.6	-58.5022	-58.9905					-58.9905	3.052
64.65	-58.3801	-58.6853					-58.6853	-0.61
64.7	-58.1055	-59.0515					-59.0515	-0.61
64.75	-58.3496	-58.7463					-58.7463	0.61
64.8	-58.4412	-58.9905					-58.9905	-2.747
64.85	-58.1055	-59.021					-59.021	4.578
64.9	-58.1055	-58.5327					-58.5327	-1.38822e-12
64.95	-58.4412	-59.021					-59.021	-1.221
65	-58.3496	-58.6548					-58.6548	1.831
65.05	-57.9529	-58.8379					-58.8379	-2.746
65.1	-58.4106	-58.9294					-58.9294	3.052
65.15	-58.4106	-58.5327					-58.5327	0.305
65.2	-58.136	-58.8989					-58.8989	-2.442
65.25	-58.136	-58.7769					-58.7769	0.915
65.3	-58.4106	-58.8074					-58.8074	-2.136
65.35	-58.2886	-58.9905					-58.9905	2.747
65.4	-57.8918	-58.5327					-58.5327	0.305
65.45	-58.197	-58.96					-58.96	-4.273
65.5	-58.2581	-58.96					-58.96	4.273
65.55	-58.0749	-58.5327					-58.5327	-0.305
65.6	-57.9529	-58.9905					-58.9905	-2.747
65.65	-58.3191	-58.8074					-58.8074	5.188
65.7	-58.2886	-58.4717					-58.4717	-0.915
65.75	-57.9224	-58.8989					-58.8989	-3.052
65.8	-58.197	-58.7769					-58.7769	5.188
65.85	-58.3801	-58.3801					-58.3801	-2.136
65.9	-58.2581	-58.9905					-58.9905	-4.883
65.95	-57.8613	-58.8684					-58.8684	5.799
66	-58.2275	-58.4106					-58.4106	1.526
66.05	-58.2886	-58.7158					-58.7158	-3.968
66.1	-58.136	-58.8074					-58.8074	0.915
66.15	-57.8308	-58.6243					-58.6243	1.831
66.2	-58.2886	-58.6243					-58.6243	-1.526
66.25	-58.2581	-58.7769					-58.7769	-1.526
66.3	-58.136	-58.7769					-58.7769	3.663
66.35	-57.8613	-58.4106					-58.4106	-0.61
66.4	-58.3191	-58.8379					-58.8379	-3.663
66.45	-58.3191	-58.7769					-58.7769	4.883
66.5	-58.0749	-58.3496					-58.3496	0
66.55	-57.9224	-58.7769					-58.7769	-5.798
66.6	-58.197	-58.9294					-58.9294	1.832
66.65	-58.2886	-58.5937					-58.5937	4.272
66.7	-58.1055	-58.5022					-58.5022	-3.357
66.75	-57.7087	-58.9294					-58.9294	-3.357
66.8	-58.0139	-58.8379					-58.8379	4.272
66.85	-58.2886	-58.5022					-58.5022	1.831
66.9	-58.197	-58.6548					-58.6548	-2.441
66.95	-57.8613	-58.7463					-58.7463	0.305
67	-58.0444	-58.6243					-58.6243	3.662
67.05	-58.2886	-58.3801					-58.3801	-1.831
67.1	-58.2581	-58.8074					-58.8074	-4.273
67.15	-57.9224	-58.8074					-58.8074	1.831
67.2	-57.9224	-58.6243					-58.6243	2.747
67.25	-58.2581	-58.5327					-58.5327	-2.136
67.3	-58.2886	-58.8379					-58.8379	-2.747
67.35	-58.0749	-58.8074					-58.8074	2.442
67.4	-57.8308	-58.5937					-58.5937	1.526
67.45	-58.0139	-58.6548					-58.6548	-2.442
67.5	-58.3191	-58.8379					-58.8379	-0.61
67.55	-58.197	-58.7158					-58.7158	4.578
67.6	-58.0139	-58.3801					-58.3801	2.441
67.65	-57.8003	-58.4717					-58.4717	-4.578
67.7	-58.2275	-58.8379					-58.8379	-1.526
67.75	-58.3496	-58.6243					-58.6243	5.493
67.8	-58.2275	-58.2886					-58.2886	0.611
67.85	-57.9529	-58.5632					-58.5632	-4.883
67.9	-57.9224	-58.7769					-58.7769	-1.831
67.95	-58.2275	-58.7463					-58.7463	3.968
68	-58.2275	-58.3801					-58.3801	2.136
68.05	-58.1665	-58.5327					-58.5327	-5.493
68.1	-58.0139	-58.9294					-58.9294	-1.221
68.15	-57.8003	-58.6548					-58.6548	5.188
68.2	-58.1665	-58.4106					-58.4106	3.357
68.25	-58.2581	-58.3191					-58.3191	-1.831
68.3	-58.1665	-58.5937					-58.5937	-3.052
68.35	-58.0749	-58.6243					-58.6243	1.831
68.4	-57.8613	-58.4106					-58.4106	4.273
68.45	-58.0749	-58.197					-58.197	-2.442
68.5	-58.3191	-58.6548					-58.6548	-4.578
68.55	-58.197	-58.6548					-58.6548	0.916
68.6	-58.136	-58.5632					-58.5632	3.967
68.65	-57.8613	-58.2581					-58.2581	-8.67306e-13
68.7	-57.9224	-58.5632					-58.5632	-4.577
68.75	-58.197	-58.7158					-58.7158	-1.221
68.8	-58.1665	-58.6853					-58.6853	3.052
68.85	-57.9224	-58.4106					-58.4106	3.662
68.9	-57.8918	-58.3191					-58.3191	-1.526
68.95	-58.3191	-58.5632					-58.5632	-4.272
69	-58.2275	-58.7463					-58.7463	-1.221
69.05	-57.8918	-58.6853					-58.6853	4.272
69.1	-58.2581	-58.3191					-58.3191	3.052
69.15	-58.1055	-58.3801					-58.3801	-3.662
69.2	-57.9224	-58.6853					-58.6853	-3.662
69.25	-58.2886	-58.7463					-58.7463	0.916
69.3	-57.8613	-58.5937					-58.5937	3.662
69.35	-58.136	-58.3801					-58.3801	1.22
69.4	-58.1665	-58.4717					-58.4717	-3.052
69.45	-57.9224	-58.6853					-58.6853	-1.831
69.5	-58.197	-58.6548					-58.6548	0.916
69.55	-57.6782	-58.5937					-58.5937	2.747
69.6	-58.2275	-58.3801					-58.3801	2.746
69.65	-57.9529	-58.3191					-58.3191	-2.442
69.7	-58.2886	-58.6243					-58.6243	-3.052
69.75	-57.9529	-58.6243					-58.6243	-0.61
69.8	-58.1665	-58.6853					-58.6853	1.526
69.85	-58.197	-58.4717					-58.4717	4.578
69.9	-58.0444	-58.2275					-58.2275	-0.305
69.95	-58.2886	-58.5022					-58.5022	-4.578
70	-57.8308	-58.6853					-58.6853	-1.526
70.05	-58.2581	-58.6548					-58.6548	2.136
70.1	-57.8003	-58.4717					-58.4717	3.357
70.15	-58.2581	-58.3191					-58.3191	1.221
70.2	-57.9224	-58.3496					-58.3496	-2.441
70.25	-58.1055	-58.5632					-58.5632	-3.357
70.3	-58.2886	-58.6853					-58.6853	0.61
70.35	-57.9834	-58.5022					-58.5022	2.441
70.4	-58.2275	-58.4412					-58.4412	1.831
70.45	-57.9529	-58.3191					-58.3191	1.526
70.5	-58.3496	-58.2886					-58.2886	-2.746
70.55	-58.3496	-58.5937					-58.5937	-3.662
70.6	-57.9529	-58.6548					-58.6548	-0.611
70.65	-58.3191	-58.6548					-58.6548	0.611
70.7	-58.0444	-58.5937					-58.5937	2.136
70.75	-58.197	-58.4412					-58.4412	3.051
70.8	-58.2581	-58.2886					-58.2886	-1.22
70.85	-57.8308	-58.5632					-58.5632	-3.967
70.9	-58.3191	-58.6853					-58.6853	-1.221
70.95	-58.2275	-58.6853					-58.6853	0.916
71	-58.0444	-58.5937					-58.5937	2.441
71.05	-58.4106	-58.4412					-58.4412	2.746
71.1	-58.1055	-58.3191					-58.3191	0.916
71.15	-58.197	-58.3496					-58.3496	-3.052
71.2	-58.5022	-58.6243					-58.6243	-3.662
71.25	-57.9834	-58.7158					-58.7158	-1.22
71.3	-58.2886	-58.7463					-58.7463	-0.305
71.35	-58.3801	-58.7463					-58.7463	2.136
71.4	-57.9224	-58.5327					-58.5327	3.662
71.45	-58.3801	-58.3801					-58.3801	1.526
71.5	-58.3801	-58.3801					-58.3801	-1.526
71.55	-57.9834	-58.5327					-58.5327	-3.357
71.6	-58.5022	-58.7158					-58.7158	-1.526
71.65	-58.3191	-58.6853					-58.6853	0.915
71.7	-57.9529	-58.6243					-58.6243	0
71.75	-58.4106	-58.6853					-58.6853	0.306
71.8	-58.3191	-58.5937					-58.5937	2.441
71.85	-57.9834	-58.4412					-58.4412	2.136
71.9	-58.4106	-58.3801					-58.3801	-1.831
71.95	-58.2886	-58.6243					-58.6243	-4.578
72	-57.9224	-58.8379					-58.8379	-1.526
72.05	-58.4106	-58.7769					-58.7769	1.221
72.1	-58.2275	-58.7158					-58.7158	0.306
72.15	-57.8308	-58.7463					-58.7463	1.526
72.2	-58.3191	-58.5632					-58.5632	2.746
72.25	-58.3496	-58.4717					-58.4717	0.305
72.3	-57.9224	-58.5327					-58.5327	-3.052
72.35	-58.2886	-58.7769					-58.7769	-2.442
72.4	-58.2581	-58.7769					-58.7769	1.221
72.45	-57.8918	-58.6548					-58.6548	3.968
72.5	-58.3496	-58.3801					-58.3801	-0.915
72.55	-58.3496	-58.7463					-58.7463	-4.883
72.6	-58.0139	-58.8684					-58.8684	0.61
72.65	-58.2275	-58.6853					-58.6853	2.441
72.7	-58.3191	-58.6243					-58.6243	-1.221
72.75	-58.136	-58.8074					-58.8074	0.611
72.8	-58.0749	-58.5632					-58.5632	1.221
72.85	-58.3496	-58.6853					-58.6853	-3.357
72.9	-58.2275	-58.8989					-58.8989	3.052
72.95	-57.9834	-58.3801					-58.3801	0.61
73	-58.4717	-58.8379					-58.8379	-3.968
73.05	-58.3496	-58.7769					-58.7769	3.052
73.1	-57.9834	-58.5327					-58.5327	-1.525
73.15	-58.3801	-58.9294					-58.9294	0.915
73.2	-58.3801	-58.4412					-58.4412	-0.611
73.25	-58.2275	-58.9905					-58.9905	-5.188
73.3	-58.197	-58.96					-58.96	4.578
73.35	-58.5022	-58.5327					-58.5327	1.21414e-12
73.4	-58.3191	-58.96					-58.96	-1.221
73.45	-57.8918	-58.6548					-58.6548	-0.305
73.5	-58.3191	-58.9905					-58.9905	-2.136
73.55	-58.4106	-58.8684					-58.8684	4.273
73.6	-58.136	-58.5632					-58.5632	-1.526
73.65	-58.136	-59.021					-59.021	-1.831
73.7	-58.5327	-58.7463					-58.7463	2.136
73.75	-58.3496	-58.8074					-58.8074	-2.747
73.8	-58.0444	-59.021					-59.021	2.747
73.85	-58.3801	-58.5327					-58.5327	0.61
73.9	-58.4412	-58.96					-58.96	-5.493
73.95	-58.2886	-59.082					-59.082	3.663
74	-58.0139	-58.5937					-58.5937	1.526
74.05	-58.5022	-58.9294					-58.9294	-5.188
74.1	-58.3801	-59.1125					-59.1125	2.746
74.15	-58.0444	-58.6548					-58.6548	1.831
74.2	-58.1665	-58.9294					-58.9294	-3.052
74.25	-58.4412	-58.96					-58.96	1.831
74.3	-58.3801	-58.7463					-58.7463	2.442
74.35	-57.9529	-58.7158					-58.7158	-2.747
74.4	-58.3191	-59.021					-59.021	-1.221
74.45	-58.5327	-58.8379					-58.8379	3.662
74.5	-58.2886	-58.6548					-58.6548	-3.052
74.55	-57.9834	-59.1431					-59.1431	-3.357
74.6	-58.3191	-58.9905					-58.9905	5.799
74.65	-58.4717	-58.5632					-58.5632	-1.22
74.7	-58.3496	-59.1125					-59.1125	-4.273
74.75	-57.8918	-58.9905					-58.9905	3.662
74.8	-58.2886	-58.7463					-58.7463	2.442
74.85	-58.4106	-58.7463					-58.7463	-1.831
74.9	-58.3496	-58.9294					-58.9294	-1.526
74.95	-57.9834	-58.8989					-58.8989	4.577
75	-58.2581	-58.4717					-58.4717	0
75.05	-58.5632	-58.8989					-58.8989	-3.967
75.1	-58.4106	-58.8684					-58.8684	2.441
75.15	-58.0444	-58.6548					-58.6548	1.221
75.2	-58.197	-58.7463					-58.7463	-2.441
75.25	-58.5022	-58.8989					-58.8989	-0.306
75.3	-58.4106	-58.7769					-58.7769	3.662
75.35	-58.1665	-58.5327					-58.5327	-0.305
75.4	-57.9834	-58.8074					-58.8074	-3.662
75.45	-58.3191	-58.8989					-58.8989	0.916
75.5	-58.4106	-58.7158					-58.7158	3.967
75.55	-58.2886	-58.5022					-58.5022	-2.136
75.6	-58.0444	-58.9294					-58.9294	-3.662
75.65	-58.1665	-58.8684					-58.8684	3.051
75.7	-58.5022	-58.6243					-58.6243	3.357
75.75	-58.4717	-58.5327					-58.5327	-2.136
75.8	-58.197	-58.8379					-58.8379	-3.357
75.85	-58.0749	-58.8684					-58.8684	3.052
75.9	-58.4412	-58.5327					-58.5327	3.052
75.95	-58.5327	-58.5632					-58.5632	-3.052
76	-58.3801	-58.8379					-58.8379	-3.662
76.05	-58.1665	-58.9294					-58.9294	1.831
76.1	-58.0444	-58.6548					-58.6548	2.746
76.15	-58.4412	-58.6548					-58.6548	-2.441
76.2	-58.4412	-58.8989					-58.8989	-2.136
76.25	-58.4106	-58.8684					-58.8684	4.577
76.3	-58.136	-58.4412					-58.4412	3.052
76.35	-58.2581	-58.5632					-58.5632	-3.662
76.4	-58.5022	-58.8074					-58.8074	-2.137
76.45	-58.5632	-58.7769					-58.7769	2.442
76.5	-58.5022	-58.5632					-58.5632	3.357
76.55	-58.3191	-58.4412					-58.4412	-2.442
76.6	-58.2581	-58.8074					-58.8074	-3.051
76.65	-58.5022	-58.7463					-58.7463	1.526
76.7	-58.5632	-58.6548					-58.6548	2.746
76.75	-58.4717	-58.4717					-58.4717	-0.61
76.8	-58.3496	-58.7158					-58.7158	-3.357
76.85	-58.1055	-58.8074					-58.8074	-0.305
76.9	-58.2275	-58.7463					-58.7463	4.578
76.95	-58.5022	-58.3496					-58.3496	1.526
77	-58.5632	-58.5937					-58.5937	-4.273
77.05	-58.3801	-58.7769					-58.7769	-0.916
77.1	-58.0444	-58.6853					-58.6853	2.137
77.15	-58.5022	-58.5632					-58.5632	3.967
77.2	-58.6243	-58.2886					-58.2886	-1.526
77.25	-58.4412	-58.7158					-58.7158	-4.577
77.3	-58.197	-58.7463					-58.7463	0.305
77.35	-58.5632	-58.6853					-58.6853	2.136
77.4	-58.4717	-58.5327					-58.5327	2.441
77.45	-58.1665	-58.4412					-58.4412	-2.442
77.5	-58.6853	-58.7769					-58.7769	-3.662
77.55	-58.4717	-58.8074					-58.8074	1.526
77.6	-58.3496	-58.6243					-58.6243	3.357
77.65	-58.7463	-58.4717					-58.4717	0.916
77.7	-58.3191	-58.5327					-58.5327	-3.052
77.75	-58.6853	-58.7769					-58.7769	-2.442
77.8	-58.4412	-58.7769					-58.7769	1.526
77.85	-58.7158	-58.6243					-58.6243	3.357
77.9	-58.5632	-58.4412					-58.4412	0.611
77.95	-58.5632	-58.5632					-58.5632	-4.577
78	-58.7463	-58.8989					-58.8989	-3.662
78.05	-58.3191	-58.9294					-58.9294	1.526
78.1	-58.7158	-58.7463					-58.7463	3.051
78.15	-58.1665	-58.6243					-58.6243	2.441
78.2	-58.7158	-58.5022					-58.5022	-1.22
78.25	-58.2581	-58.7463					-58.7463	-3.967
78.3	-58.7158	-58.8989					-58.8989	0
78.35	-58.4717	-58.7463					-58.7463	2.746
78.4	-58.5937	-58.6243					-58.6243	2.441
78.45	-58.5632	-58.5022					-58.5022	0
78.5	-58.4717	-58.6243					-58.6243	-3.662
78.55	-58.6853	-58.8684					-58.8684	-2.746
78.6	-58.136	-58.8989					-58.8989	-0.305
78.65	-58.6853	-58.8989					-58.8989	1.526
78.7	-58.4412	-58.7463					-58.7463	3.967
78.75	-58.5022	-58.5022					-58.5022	1.22
78.8	-58.6853	-58.6243					-58.6243	-4.578
78.85	-58.2275	-58.96					-58.96	-2.746
78.9	-58.6548	-58.8989					-58.8989	0.306
78.95	-58.5632	-58.9294					-58.9294	3.052
79	-58.5632	-58.5937					-58.5937	5.493
79.05	-58.6548	-58.3801					-58.3801	0
79.1	-58.2275	-58.5937					-58.5937	-4.578
79.15	-58.8379	-58.8379					-58.8379	-2.747
79.2	-58.6548	-58.8684					-58.8684	0.305
79.25	-58.4106	-58.8074					-58.8074	1.221
79.3	-58.7158	-58.7463					-58.7463	1.526
79.35	-58.5327	-58.6548					-58.6548	3.051
79.4	-58.5022	-58.4412					-58.4412	-6.0707e-13
79.45	-58.7158	-58.6548					-58.6548	-4.577
79.5	-58.3191	-58.8989					-58.8989	-2.441
79.55	-58.6548	-58.8989					-58.8989	0.61
79.6	-58.6853	-58.8379					-58.8379	1.831
79.65	-58.2275	-58.7158					-58.7158	3.052
79.7	-58.7158	-58.5327					-58.5327	2.441
79.75	-58.6853	-58.4717					-58.4717	0
79.8	-58.2275	-58.5327					-58.5327	-3.662
79.85	-58.7769	-58.8379					-58.8379	-3.662
79.9	-58.5327	-58.8989					-58.8989	-0.305
79.95	-58.3496	-58.8684					-58.8684	0
80	-58.6243	-58.8989					-58.8989	1.526
80.05	-58.4412	-58.7158					-58.7158	3.662
80.1	-58.3191	-58.5327					-58.5327	2.136
80.15	-58.5937	-58.5022					-58.5022	-1.526
80.2	-58.3801	-58.6853					-58.6853	-3.357
80.25	-58.3496	-58.8379					-58.8379	-2.136
80.3	-58.6853	-58.8989					-58.8989	0
80.35	-58.4717	-58.8379					-58.8379	1.73306e-13
80.4	-58.2886	-58.8989					-58.8989	1.221
80.45	-58.6853	-58.7158					-58.7158	2.441
80.5	-58.5632	-58.6548					-58.6548	2.441
80.55	-58.3191	-58.4717					-58.4717	-1.526
80.6	-58.6548	-58.8074					-58.8074	-5.188
80.65	-58.5632	-58.9905					-58.9905	-0.305
80.7	-58.2275	-58.8379					-58.8379	2.136
80.75	-58.6548	-58.7769					-58.7769	3.052
80.8	-58.5632	-58.5327					-58.5327	-0.61
80.85	-58.1665	-58.8379					-58.8379	-3.967
80.9	-58.6853	-58.9294					-58.9294	1.526
80.95	-58.6243	-58.6853					-58.6853	3.662
81	-58.2275	-58.5632					-58.5632	-2.747
81.05	-58.6548	-58.96					-58.96	-1.526
81.1	-58.6548	-58.7158					-58.7158	4.273
81.15	-58.3496	-58.5327					-58.5327	-1.526
81.2	-58.5327	-58.8684					-58.8684	-1.526
81.25	-58.6243	-58.6853					-58.6853	1.526
81.3	-58.4412	-58.7158					-58.7158	-1.831
81.35	-58.2886	-58.8684					-58.8684	2.136
81.4	-58.7158	-58.5022					-58.5022	-0.305
81.45	-58.4412	-58.8989					-58.8989	-2.441
81.5	-58.1665	-58.7463					-58.7463	2.441
81.55	-58.6548	-58.6548					-58.6548	-0.611
81.6	-58.6243	-58.8074					-58.8074	2.136
81.65	-58.2886	-58.4412					-58.4412	-0.61
81.7	-58.4717	-58.8684					-58.8684	-1.831
81.75	-58.6853	-58.6243					-58.6243	2.441
81.8	-58.5022	-58.6243					-58.6243	-1.526
81.85	-58.197	-58.7769					-58.7769	1.221
81.9	-58.7158	-58.5022					-58.5022	-1.22
81.95	-58.7463	-58.8989					-58.8989	-3.052
82	-58.2581	-58.8074					-58.8074	4.272
82.05	-58.5327	-58.4717					-58.4717	-0.915
82.1	-58.6548	-58.8989					-58.8989	-1.831
82.15	-58.5022	-58.6548					-58.6548	3.357
82.2	-58.3496	-58.5632					-58.5632	-1.526
82.25	-58.6548	-58.8074					-58.8074	0
82.3	-58.7158	-58.5632					-58.5632	2.137
82.35	-58.4717	-58.5937					-58.5937	-2.137
82.4	-58.4717	-58.7769					-58.7769	-0.306
82.45	-58.8989	-58.6243					-58.6243	3.052
82.5	-58.6853	-58.4717					-58.4717	-2.746
82.55	-58.3801	-58.8989					-58.8989	-2.441
82.6	-58.6243	-58.7158					-58.7158	4.577
82.65	-58.8379	-58.4412					-58.4412	-1.526
82.7	-58.6853	-58.8684					-58.8684	-3.357
82.75	-58.2886	-58.7769					-58.7769	3.967
82.8	-58.5327	-58.4717					-58.4717	-0.61
82.85	-58.7769	-58.8379					-58.8379	-2.746
82.9	-58.5632	-58.7463					-58.7463	4.578
82.95	-58.3496	-58.3801					-58.3801	0.305
83	-58.6548	-58.7158					-58.7158	-4.578
83.05	-58.7769	-58.8379					-58.8379	1.526
83.1	-58.7463	-58.5632					-58.5632	3.357
83.15	-58.3801	-58.5022					-58.5022	-3.662
83.2	-58.7158	-58.9294					-58.9294	-2.747
83.25	-58.8074	-58.7769					-58.7769	6.103
83.3	-58.6548	-58.3191					-58.3191	0.611
83.35	-58.3496	-58.7158					-58.7158	-4.578
83.4	-58.5937	-58.7769					-58.7769	0.61
83.45	-58.7463	-58.6548					-58.6548	3.052
83.5	-58.6853	-58.4717					-58.4717	-1.221
83.55	-58.4412	-58.7769					-58.7769	-2.746
83.6	-58.5022	-58.7463					-58.7463	4.273
83.65	-58.7769	-58.3496					-58.3496	2.136
83.7	-58.7463	-58.5327					-58.5327	-3.967
83.75	-58.5632	-58.7463					-58.7463	0
83.8	-58.3801	-58.5327					-58.5327	3.662
83.85	-58.8074	-58.3801					-58.3801	-1.831
83.9	-58.7463	-58.7158					-58.7158	-3.357
83.95	-58.6853	-58.7158					-58.7158	1.221
84	-58.4717	-58.5937					-58.5937	3.052
84.05	-58.5632	-58.4106					-58.4106	-1.832
84.1	-58.7158	-58.7769					-58.7769	-3.357
84.15	-58.7463	-58.7463					-58.7463	3.052
84.2	-58.5327	-58.4717					-58.4717	2.746
84.25	-58.3801	-58.4717					-58.4717	-2.746
84.3	-58.7158	-58.7463					-58.7463	-2.441
84.35	-58.8684	-58.7158					-58.7158	3.051
84.4	-58.8074	-58.4412					-58.4412	3.662
84.45	-58.4717	-58.3496					-58.3496	-4.882
84.5	-58.5022	-58.9294					-58.9294	-3.967
84.55	-58.7769	-58.7463					-58.7463	4.577
84.6	-58.7769	-58.4717					-58.4717	2.136
84.65	-58.7463	-58.5327					-58.5327	-3.662
84.7	-58.4717	-58.8379					-58.8379	-2.747
84.75	-58.4106	-58.8074					-58.8074	3.052
84.8	-58.7769	-58.5327					-58.5327	3.968
84.85	-58.8074	-58.4106					-58.4106	-2.442
84.9	-58.6243	-58.7769					-58.7769	-2.747
84.95	-58.4106	-58.6853					-58.6853	2.137
85	-58.4717	-58.5632					-58.5632	4.578
85.05	-58.7769	-58.2275					-58.2275	-0.916
85.1	-58.8379	-58.6548					-58.6548	-5.494
85.15	-58.7158	-58.7769					-58.7769	-0.61
85.2	-58.5937	-58.7158					-58.7158	3.663
85.25	-58.2886	-58.4106					-58.4106	2.136
85.3	-58.5632	-58.5022					-58.5022	-4.273
85.35	-58.7158	-58.8379					-58.8379	-2.747
85.4	-58.6243	-58.7769					-58.7769	3.662
85.45	-58.4717	-58.4717					-58.4717	4.578
85.5	-58.3801	-58.3191					-58.3191	-1.831
85.55	-58.6548	-58.6548					-58.6548	-3.967
85.6	-58.7158	-58.7158					-58.7158	-1.73306e-13
85.65	-58.4106	-58.6548					-58.6548	3.357
85.7	-58.6243	-58.3801					-58.3801	3.662
85.75	-58.7158	-58.2886					-58.2886	-3.662
85.8	-58.2886	-58.7463					-58.7463	-4.272
85.85	-58.7463	-58.7158					-58.7158	1.831
85.9	-58.6853	-58.5632					-58.5632	4.272
85.95	-58.3191	-58.2886					-58.2886	-0.305
86	-58.7158	-58.5937					-58.5937	-5.188
86.05	-58.3191	-58.8074					-58.8074	-0.611
86.1	-58.6853	-58.6548					-58.6548	1.831
86.15	-58.5022	-58.6243					-58.6243	3.357
86.2	-58.5632	-58.3191					-58.3191	1.221
86.25	-58.6243	-58.5022					-58.5022	-3.357
86.3	-58.3191	-58.6548					-58.6548	-1.831
86.35	-58.6243	-58.6853					-58.6853	0.916
86.4	-58.2275	-58.5632					-58.5632	2.747
86.45	-58.6548	-58.4106					-58.4106	2.136
86.5	-58.2275	-58.3496					-58.3496	-3.052
86.55	-58.7463	-58.7158					-58.7158	-4.273
86.6	-58.4412	-58.7769					-58.7769	0.305
86.65	-58.5937	-58.6853					-58.6853	2.442
86.7	-58.5327	-58.5327					-58.5327	4.272
86.75	-58.4106	-58.2581					-58.2581	-0.305
86.8	-58.5632	-58.5632					-58.5632	-5.493
86.85	-58.136	-58.8074					-58.8074	-1.526
86.9	-58.5632	-58.7158					-58.7158	0.916
86.95	-58.2275	-58.7158					-58.7158	2.441
87	-58.5632	-58.4717					-58.4717	4.577
87.05	-58.4717	-58.2581					-58.2581	-0.915
87.1	-58.3191	-58.5632					-58.5632	-5.798
87.15	-58.6548	-58.8379					-58.8379	-1.526
87.2	-58.2275	-58.7158					-58.7158	1.221
87.25	-58.5327	-58.7158					-58.7158	1.526
87.3	-58.5022	-58.5632					-58.5632	3.052
87.35	-58.197	-58.4106					-58.4106	0.915
87.4	-58.5022	-58.4717					-58.4717	-3.663
87.45	-58.2275	-58.7769					-58.7769	-2.746
87.5	-58.3191	-58.7463					-58.7463	1.221
87.55	-58.3801	-58.6548					-58.6548	1.526
87.6	-57.9529	-58.5937					-58.5937	3.357
87.65	-58.3496	-58.3191					-58.3191	2.746
87.7	-58.3191	-58.3191					-58.3191	-2.441
87.75	-57.9834	-58.5632					-58.5632	-4.272
87.8	-58.5632	-58.7463					-58.7463	-0.916
87.85	-58.3191	-58.6548					-58.6548	1.22
87.9	-58.1665	-58.6243					-58.6243	0.916
87.95	-58.4412	-58.5632					-58.5632	2.442
88	-58.2275	-58.3801					-58.3801	3.051
88.05	-58.2886	-58.2581					-58.2581	-1.221
88.1	-58.5022	-58.5022					-58.5022	-4.272
88.15	-57.9529	-58.6853					-58.6853	-2.441
88.2	-58.3191	-58.7463					-58.7463	0.305
88.25	-58.4412	-58.6548					-58.6548	1.526
88.3	-58.0444	-58.5937					-58.5937	2.747
88.35	-58.4106	-58.3801					-58.3801	3.356
88.4	-58.3801	-58.2581					-58.2581	0.915
88.45	-58.0749	-58.2886					-58.2886	-2.441
88.5	-58.4717	-58.5022					-58.5022	-3.662
88.55	-58.4717	-58.6548					-58.6548	-2.441
88.6	-58.1055	-58.7463					-58.7463	-0.61
88.65	-58.4717	-58.7158					-58.7158	2.136
88.7	-58.4717	-58.5327					-58.5327	2.441
88.75	-57.9834	-58.4717					-58.4717	2.136
88.8	-58.3496	-58.3191					-58.3191	0.611
88.85	-58.3801	-58.4106					-58.4106	-3.662
88.9	-57.9834	-58.6853					-58.6853	-3.052
88.95	-58.3496	-58.7158					-58.7158	0.916
89	-58.3801	-58.5937					-58.5937	3.662
89.05	-57.9529	-58.3496					-58.3496	2.746
89.1	-58.3496	-58.3191					-58.3191	-2.747
89.15	-58.4106	-58.6243					-58.6243	-2.136
89.2	-58.1665	-58.5327					-58.5327	2.137
89.25	-58.2581	-58.4106					-58.4106	1.831
89.3	-58.4412	-58.3496					-58.3496	-2.137
89.35	-58.2581	-58.6243					-58.6243	-1.526
89.4	-58.0139	-58.5022					-58.5022	2.442
89.45	-58.4106	-58.3801					-58.3801	-1.526
89.5	-58.2275	-58.6548					-58.6548	0.305
89.55	-57.8918	-58.3496					-58.3496	2.442
89.6	-58.5327	-58.4106					-58.4106	-2.136
89.65	-58.3801	-58.5632					-58.5632	1.525
89.7	-57.8918	-58.2581					-58.2581	-0.611
89.75	-58.3801	-58.6243					-58.6243	-2.746
89.8	-58.3496	-58.5327					-58.5327	3.968
89.85	-58.1665	-58.2275					-58.2275	-1.221
89.9	-58.0444	-58.6548					-58.6548	1.21414e-12
89.95	-58.3801	-58.2275					-58.2275	0.611
90	-58.3801	-58.5937					-58.5937	-3.357
90.05	-57.8613	-58.5632					-58.5632	2.441
90.1	-58.2886	-58.3496					-58.3496	-1.221
90.15	-58.2886	-58.6853					-58.6853	1.831
90.2	-57.9529	-58.1665					-58.1665	0.916
90.25	-58.1665	-58.5937					-58.5937	-3.967
90.3	-58.3801	-58.5632					-58.5632	4.272
90.35	-58.1665	-58.1665					-58.1665	-1.221
90.4	-57.9529	-58.6853					-58.6853	-2.136
90.45	-58.2886	-58.3801					-58.3801	3.967
90.5	-58.2581	-58.2886					-58.2886	-4.273
90.55	-58.0749	-58.8074					-58.8074	-1.22
90.6	-58.0749	-58.4106					-58.4106	4.273
90.65	-58.2886	-58.3801					-58.3801	-2.442
90.7	-58.2275	-58.6548					-58.6548	-0.916
90.75	-57.8918	-58.4717					-58.4717	2.136
90.8	-58.136	-58.4412					-58.4412	-1.22
90.85	-58.2581	-58.5937					-58.5937	0.306
90.9	-58.136	-58.4106					-58.4106	3.051
90.95	-57.8308	-58.2886					-58.2886	-1.831
91	-58.197	-58.5937					-58.5937	-2.441
91.05	-58.3191	-58.5327					-58.5327	4.272
91.1	-58.2275	-58.1665					-58.1665	-0.305
91.15	-57.8308	-58.5632					-58.5632	-4.883
91.2	-58.2581	-58.6548					-58.6548	4.883
91.25	-58.2581	-58.0749					-58.0749	1.526
91.3	-58.136	-58.5022					-58.5022	-5.188
91.35	-57.8308	-58.5937					-58.5937	1.221
91.4	-58.197	-58.3801					-58.3801	1.525
91.45	-58.1665	-58.4412					-58.4412	-2.442
91.5	-58.0139	-58.6243					-58.6243	-0.61
91.55	-57.8308	-58.5022					-58.5022	4.578
91.6	-58.1665	-58.1665					-58.1665	9.54348e-13
91.65	-58.136	-58.5022					-58.5022	-4.272
91.7	-58.0749	-58.5937					-58.5937	2.747
91.75	-57.8308	-58.2275					-58.2275	3.662
91.8	-58.197	-58.2275					-58.2275	-4.273
91.85	-58.2886	-58.6548					-58.6548	-2.747
91.9	-58.136	-58.5022					-58.5022	5.188
91.95	-57.8918	-58.136					-58.136	-0.61
92	-57.9834	-58.5632					-58.5632	-4.883
92.05	-58.3191	-58.6243					-58.6243	0.305
92.1	-58.1665	-58.5327					-58.5327	3.662
92.15	-57.9224	-58.2581					-58.2581	-1.526
92.2	-57.9224	-58.6853					-58.6853	-4.272
92.25	-58.2581	-58.6853					-58.6853	4.272
92.3	-58.2581	-58.2581					-58.2581	2.747
92.35	-58.197	-58.4106					-58.4106	-3.967
92.4	-57.9834	-58.6548					-58.6548	-1.221
92.45	-58.0444	-58.5327					-58.5327	3.967
92.5	-58.4717	-58.2581					-58.2581	0.915
92.55	-58.3801	-58.4412					-58.4412	-3.662
92.6	-58.2581	-58.6243					-58.6243	-1.525
92.65	-57.9529	-58.5937					-58.5937	3.052
92.7	-58.197	-58.3191					-58.3191	-0.306
92.75	-58.3496	-58.6243					-58.6243	-3.052
92.8	-58.2581	-58.6243					-58.6243	0.916
92.85	-58.136	-58.5327					-58.5327	3.357
92.9	-57.9224	-58.2886					-58.2886	0.915
92.95	-58.197	-58.4412					-58.4412	-4.577
93	-58.4106	-58.7463					-58.7463	-1.525
93.05	-58.3801	-58.5937					-58.5937	5.188
93.1	-58.0749	-58.2275					-58.2275	1.22
93.15	-57.9834	-58.4717					-58.4717	-4.273
93.2	-58.3191	-58.6548					-58.6548	-1.526
93.25	-58.4717	-58.6243					-58.6243	3.357
93.3	-58.3496	-58.3191					-58.3191	2.442
93.35	-58.1665	-58.3801					-58.3801	-3.967
93.4	-57.9529	-58.7158					-58.7158	-2.442
93.45	-58.0749	-58.6243					-58.6243	2.441
93.5	-58.3801	-58.4717					-58.4717	3.052
93.55	-58.3801	-58.3191					-58.3191	-0.61
93.6	-58.3191	-58.5327					-58.5327	-3.967
93.65	-58.136	-58.7158					-58.7158	5.20473e-13
93.7	-58.197	-58.5327					-58.5327	4.883
93.75	-58.4106	-58.2275					-58.2275	0.915
93.8	-58.4412	-58.4412					-58.4412	-4.883
93.85	-58.2886	-58.7158					-58.7158	-2.746
93.9	-58.1665	-58.7158					-58.7158	1.831
93.95	-58.5632	-58.5327					-58.5327	3.662
94	-58.4717	-58.3496					-58.3496	-0.61
94.05	-58.0139	-58.5937					-58.5937	-2.747
94.1	-58.5632	-58.6243					-58.6243	-0.611
94.15	-58.4717	-58.6548					-58.6548	0.611
94.2	-58.0749	-58.5632					-58.5632	4.883
94.25	-58.5022	-58.1665					-58.1665	-0.611
94.3	-58.3496	-58.6243					-58.6243	-4.883
94.35	-58.4412	-58.6548					-58.6548	0.916
94.4	-58.4412	-58.5327					-58.5327	2.136
94.45	-58.2275	-58.4412					-58.4412	2.441
94.5	-58.6853	-58.2886					-58.2886	-1.831
94.55	-58.1055	-58.6243					-58.6243	-3.967
94.6	-58.5937	-58.6853					-58.6853	-1.22
94.65	-58.136	-58.7463					-58.7463	1.526
94.7	-58.6243	-58.5327					-58.5327	4.272
94.75	-58.2886	-58.3191					-58.3191	-0.61
94.8	-58.5327	-58.5937					-58.5937	-4.883
94.85	-58.4106	-58.8074					-58.8074	-1.221
94.9	-58.3801	-58.7158					-58.7158	1.526
94.95	-58.6243	-58.6548					-58.6548	3.052
95	-58.197	-58.4106					-58.4106	3.357
95.05	-58.5022	-58.3191					-58.3191	-3.357
95.1	-58.1055	-58.7463					-58.7463	-3.967
95.15	-58.6853	-58.7158					-58.7158	0.61
95.2	-58.3496	-58.6853					-58.6853	1.831
95.25	-58.5022	-58.5327					-58.5327	3.052
95.3	-58.5022	-58.3801					-58.3801	-1.221
95.35	-58.3801	-58.6548					-58.6548	-3.662
95.4	-58.5632	-58.7463					-58.7463	-0.915
95.45	-58.0749	-58.7463					-58.7463	0.61
95.5	-58.5327	-58.6853					-58.6853	1.526
95.55	-58.3801	-58.5937					-58.5937	3.357
95.6	-58.2581	-58.3496					-58.3496	0.915
95.65	-58.5632	-58.5022					-58.5022	-3.052
95.7	-58.1665	-58.6548					-58.6548	-2.747
95.75	-58.5022	-58.7769					-58.7769	0
95.8	-58.6548	-58.6548					-58.6548	1.221
95.85	-58.1665	-58.6548					-58.6548	2.747
95.9	-58.5937	-58.3801					-58.3801	0.305
95.95	-58.3801	-58.6243					-58.6243	-4.273
96	-58.2886	-58.8074					-58.8074	-3.051
96.05	-58.6243	-58.9294					-58.9294	0.305
96.1	-58.2886	-58.7769					-58.7769	1.22
96.15	-58.4106	-58.8074					-58.8074	1.526
96.2	-58.4412	-58.6243					-58.6243	4.578
96.25	-58.0444	-58.3496					-58.3496	1.831
96.3	-58.5327	-58.4412					-58.4412	-3.357
96.35	-58.4412	-58.6853					-58.6853	-4.882
96.4	-58.0139	-58.9294					-58.9294	-0.916
96.45	-58.5022	-58.7769					-58.7769	1.525
96.5	-58.5327	-58.7769					-58.7769	2.137
96.55	-58.0444	-58.5632					-58.5632	3.052
96.6	-58.5327	-58.4717					-58.4717	0.305
96.65	-58.3801	-58.5327					-58.5327	-1.22
96.7	-58.1665	-58.5937					-58.5937	-3.662
96.75	-58.5937	-58.8989					-58.8989	-3.663
96.8	-58.2886	-58.96					-58.96	1.22
96.85	-58.1665	-58.7769					-58.7769	1.831
96.9	-58.5937	-58.7769					-58.7769	1.526
96.95	-58.3191	-58.6243					-58.6243	2.137
97	-58.197	-58.5632					-58.5632	1.831
97.05	-58.5632	-58.4412					-58.4412	0
97.1	-58.4106	-58.5632					-58.5632	-3.662
97.15	-58.3191	-58.8074					-58.8074	-2.747
97.2	-58.5632	-58.8379					-58.8379	-0.915
97.25	-58.3801	-58.8989					-58.8989	1.526
97.3	-58.2275	-58.6853					-58.6853	4.883
97.35	-58.5937	-58.4106					-58.4106	0.305
97.4	-58.5022	-58.6548					-58.6548	-4.883
97.45	-58.0444	-58.8989					-58.8989	-1.221
97.5	-58.5327	-58.7769					-58.7769	3.967
97.55	-58.4106	-58.5022					-58.5022	1.832
97.6	-58.0444	-58.5937					-58.5937	-1.526
97.65	-58.5022	-58.6548					-58.6548	1.73639e-13
97.7	-58.4412	-58.5937					-58.5937	0.916
97.75	-58.1665	-58.5632					-58.5632	-1.221
97.8	-58.4717	-58.7158					-58.7158	0.61
97.85	-58.4717	-58.5022					-58.5022	-0.305
97.9	-58.3191	-58.7463					-58.7463	-3.357
97.95	-58.3496	-58.8379					-58.8379	4.272
98	-58.5937	-58.3191					-58.3191	-0.305
98.05	-58.4106	-58.8684					-58.8684	-4.578
98.1	-58.1055	-58.7769					-58.7769	2.747
98.15	-58.5327	-58.5937					-58.5937	0.611
98.2	-58.5327	-58.7158					-58.7158	3.051
98.25	-58.0749	-58.2886					-58.2886	-0.305
98.3	-58.4412	-58.7463					-58.7463	-3.662
98.35	-58.5327	-58.6548					-58.6548	2.746
98.4	-58.3801	-58.4717					-58.4717	-1.221
98.45	-58.3191	-58.7769					-58.7769	1.221
98.5	-58.5937	-58.3496					-58.3496	0
98.55	-58.4717	-58.7769					-58.7769	-3.357
98.6	-58.1665	-58.6853					-58.6853	3.663
98.65	-58.5937	-58.4106					-58.4106	-1.221
98.7	-58.5327	-58.8074					-58.8074	-1.526
98.75	-58.2886	-58.5632					-58.5632	2.137
98.8	-58.197	-58.5937					-58.5937	-2.137
98.85	-58.5937	-58.7769					-58.7769	1.22
98.9	-58.4717	-58.4717					-58.4717	0.916
98.95	-58.1665	-58.6853					-58.6853	-3.052
99	-58.3801	-58.7769					-58.7769	1.526
99.05	-58.5937	-58.5327					-58.5327	1.526
99.1	-58.5022	-58.6243					-58.6243	-1.526
99.15	-58.1665	-58.6853					-58.6853	0.611
99.2	-58.5632	-58.5632					-58.5632	0.61
99.25	-58.5632	-58.6243					-58.6243	-2.747
99.3	-58.3496	-58.8379					-58.8379	0
99.35	-58.136	-58.6243					-58.6243	3.662
99.4	-58.5632	-58.4717					-58.4717	-2.746
99.45	-58.4717	-58.8989					-58.8989	-2.441
99.5	-58.2581	-58.7158					-58.7158	5.798
99.55	-58.3191	-58.3191					-58.3191	-1.221
99.6	-58.5632	-58.8379					-58.8379	-4.272
99.65	-58.5327	-58.7463					-58.7463	2.747
99.7	-58.3496	-58.5632					-58.5632	1.22
99.75	-58.2581	-58.6243					-58.6243	-2.137
99.8	-58.5327	-58.7769					-58.7769	-0.61
99.85	-58.5632	-58.6853					-58.6853	3.357
99.9	-58.3496	-58.4412					-58.4412	-1.526
[truncated: 3,002 more rows]

## Sheet: Figure 1c
Time (ms)	AP high	AP mid	AP sub		mV	DV/Dt				Mechanical stimulation of the cell body of Spiral ganglion neurons and the corresponding phase plot dV/dt			dendrites	of spiral ganglion neurons and the corresponding phase plots
0	-58.1665	-58.1055	-57.4341		-58.1665	-3.05181
0.0500031	-58.3191	-57.5867	-58.0444		-58.3191	3.05183
0.100006	-57.8613	-58.0749	-57.5867		-57.8613	-1.22266
0.149994	-58.4412	-57.6477	-57.9834		-58.4412	-1.52765
0.199997	-58.0139	-58.136	-57.8003		-58.0139	0.915945
0.25	-58.3496	-57.6477	-58.0749		-58.3496	-0.915945
0.300003	-58.1055	-58.197	-57.8003		-58.1055	0.304982
0.350006	-58.3191	-57.8308	-58.0139		-58.3191	-1.52573
0.399994	-58.2581	-58.136	-57.8308		-58.2581	1.22111
0.449997	-58.197	-57.8613	-57.9834		-58.197	-0.609963
0.5	-58.3191	-58.0139	-57.8918		-58.3191	0.609963
0.550003	-58.136	-57.9529	-57.9529		-58.136	-0.609963
0.600006	-58.3801	-57.9224	-57.8308		-58.3801	0.000732
0.649994	-58.136	-58.0444	-57.8613		-58.136	-0.610231
0.699997	-58.4412	-57.7698	-58.0139		-58.4412	1.22093
0.75	-58.0139	-58.0444	-57.8918		-58.0139	0.915945
0.800003	-58.3496	-57.6782	-58.0444		-58.3496	0
0.850006	-58.0139	-58.1055	-57.7087		-58.0139	-0.917227
0.899994	-58.4412	-57.6172	-58.1055		-58.4412	0.608681
0.949997	-57.9529	-58.136	-57.6477		-57.9529	0.610963
1	-58.3801	-57.9224	-58.0749		-58.3801	-2.13574
1.05	-58.1665	-58.0139	-57.7393		-58.1665	0.000427
1.10001	-58.3801	-57.9834	-58.0139		-58.3801	-1.83045
1.14999	-58.3496	-57.6782	-57.8918		-58.3496	2.44069
1.2	-58.136	-58.0444	-57.9224		-58.136	-0.916427
1.25	-58.4412	-57.5867	-58.1665		-58.4412	1.221
1.3	-58.0139	-58.0749	-57.6172		-58.0139	0.000854
1.35001	-58.4412	-58.0444	-58.2581		-58.4412	-1.82917
1.39999	-58.197	-57.6477	-57.8918		-58.197	2.13804
1.45	-58.2275	-58.1665	-58.1055		-58.2275	-1.52594
1.5	-58.3496	-57.8613	-58.1665		-58.3496	2.136
1.55	-58.0139	-58.0139	-57.8308		-58.0139	-0.915146
1.60001	-58.4412	-58.1055	-58.2275		-58.4412	-0.60768
1.64999	-58.0749	-57.7698	-57.8003		-58.0749	2.74865
1.7	-58.1665	-58.3191	-58.0749		-58.1665	-2.74682
1.75	-58.3496	-57.9529	-58.1055		-58.3496	2.441
1.8	-57.9224	-57.9224	-57.6782		-57.9224	0.000854
1.85001	-58.3496	-58.136	-58.1665		-58.3496	-3.96602
1.89999	-58.3191	-57.7393	-57.8308		-58.3191	3.05157
1.95	-58.0444	-58.1665	-57.9529		-58.0444	-0.000549
2	-58.3191	-58.1055	-58.197		-58.3191	0.305
2.05	-58.0139	-57.7393	-57.6477		-58.0139	0.305549
2.10001	-58.2886	-58.2275	-58.1665		-58.2886	-2.74645
2.14999	-58.2886	-58.0139	-58.0444		-58.2886	3.96721
2.2	-57.8918	-57.9224	-58.0139		-57.8918	-0.915793
2.25	-58.3801	-58.2275	-58.2581		-58.3801	-2.442
2.3	-58.136	-57.8613	-57.8003		-58.136	3.66176
2.35001	-58.0139	-58.197	-58.1055		-58.0139	-2.13759
2.39999	-58.3496	-58.1665	-58.2275		-58.3496	0.302924
2.45	-57.9834	-57.7698	-57.7087		-57.9834	1.22027
2.5	-58.2275	-58.1665	-58.2275		-58.2275	-3.967
2.55	-58.3801	-58.1665	-58.0139		-58.3801	2.44021
2.60001	-57.9834	-57.8003	-57.8613		-57.9834	1.21811
2.64999	-58.2581	-58.1665	-58.3191		-58.2581	-3.05304
2.7	-58.2886	-58.0139	-57.8613		-58.2886	3.05206
2.75	-57.9529	-57.9224	-58.0139		-57.9529	-1.22
2.8	-58.4106	-58.1665	-58.2275		-58.4106	-3.35724
2.85001	-58.2886	-57.9224	-57.8003		-58.2886	4.88322
2.89999	-57.9224	-57.9224	-58.2581		-57.9224	-0.302741
2.95	-58.3191	-58.3191	-58.1665		-58.3191	-3.35621
3	-58.2581	-58.1055	-57.7087		-58.2581	2.442
3.05	-58.0749	-58.0139	-58.2275		-58.0749	-0.914451
3.10001	-58.3496	-58.197	-58.1055		-58.3496	-0.609596
3.14999	-58.136	-57.8308	-57.8308		-58.136	1.83192
3.2	-58.1665	-58.0749	-58.197		-58.1665	-3.35694
3.25	-58.4717	-58.136	-57.8613		-58.4717	1.221
3.3	-58.0444	-57.8918	-57.8613		-58.0444	2.44237
3.35001	-58.2275	-57.8918	-58.136		-58.2275	-3.66237
3.39999	-58.4106	-58.1665	-57.9224		-58.4106	1.82954
3.45	-58.0444	-57.9224	-57.8918		-58.0444	2.13527
3.5	-58.197	-58.0139	-58.197		-58.197	-3.052
3.55	-58.3496	-58.197	-57.9834		-58.3496	1.22045
3.60001	-58.0749	-57.9529	-57.9834		-58.0749	1.52496
3.64999	-58.197	-58.0444	-58.197		-58.197	-2.74718
3.7	-58.3496	-58.1665	-57.8308		-58.3496	0.915305
3.75	-58.1055	-57.8918	-57.9529		-58.1055	1.221
3.8	-58.2275	-57.9224	-58.197		-58.2275	-3.35657
3.85001	-58.4412	-58.2275	-57.8003		-58.4412	0.00128246
3.89999	-58.2275	-58.0444	-57.8918		-58.2275	3.35761
3.95	-58.1055	-57.8003	-58.136		-58.1055	-2.13724
4	-58.4412	-58.1665	-57.8613		-58.4412	-1.22
4.05	-58.2275	-58.1055	-57.9224		-58.2275	3.96763
4.10001	-58.0444	-57.6782	-58.1055		-58.0444	-1.83283
4.14999	-58.4106	-58.1665	-57.9224		-58.4106	-1.52789
4.2	-58.197	-58.197	-57.9224		-58.197	4.57657
4.25	-57.9529	-57.8308	-58.0749		-57.9529	-1.831
4.3	-58.3801	-58.197	-57.9834		-58.3801	-3.96706
4.35001	-58.3496	-58.0749	-57.8003		-58.3496	3.9684
4.39999	-57.9834	-57.8308	-58.1055		-57.9834	-0.913619
4.45	-58.4412	-57.9529	-58.0444		-58.4412	-3.96608
4.5	-58.3801	-58.1055	-57.6477		-58.3801	2.747
4.55	-58.1665	-57.9529	-58.1055		-58.1665	1.83106
4.60001	-58.197	-57.6782	-58.1055		-58.197	-1.83155
4.64999	-58.3496	-58.0444	-57.6477		-58.3496	-0.000916
4.7	-58.197	-58.1665	-58.1055		-58.197	3.35669
4.75	-58.0139	-57.6477	-58.1055		-58.0139	-2.747
4.8	-58.4717	-57.9834	-57.8918		-58.4717	-2.74737
4.85001	-58.2886	-58.1665	-58.0139		-58.2886	5.80022
4.89999	-57.8918	-57.9834	-58.1055		-57.8918	-1.21737
4.95	-58.4106	-57.8613	-57.9529		-58.4106	-4.27196
5	-58.3191	-58.1665	-57.7393		-58.3191	2.441
5.05	-58.1665	-58.136	-58.1055		-58.1665	1.83094
5.10001	-58.136	-57.7087	-58.136		-58.136	-2.74828
5.14999	-58.4412	-58.0139	-57.6172		-58.4412	-2.1374
5.2	-58.3496	-58.1665	-57.8918		-58.3496	5.18782
5.25	-57.9224	-58.0444	-58.1665		-57.9224	-0.61
5.3	-58.4106	-57.7087	-57.8918		-58.4106	-5.18794
5.35001	-58.4412	-58.1665	-57.7698		-58.4412	3.0524
5.39999	-58.1055	-58.136	-58.197		-58.1055	3.0534
5.45	-58.136	-57.8613	-58.1055		-58.136	-3.05094
5.5	-58.4106	-57.8613	-57.7698		-58.4106	-1.526
5.55	-58.2886	-58.2275	-58.0444		-58.2886	4.57633
5.60001	-57.9529	-58.0749	-58.136		-57.9529	0.303107
5.64999	-58.2581	-57.7393	-57.9224		-58.2581	-4.88386
5.7	-58.4412	-57.9834	-57.7698		-58.4412	0.306366
5.75	-58.2275	-58.1665	-58.136		-58.2275	4.273
5.8	-58.0139	-58.0444	-58.0139		-58.0139	-1.22033
5.85001	-58.3496	-57.7087	-57.7698		-58.3496	-2.74608
5.89999	-58.2886	-58.0139	-58.0139		-58.2886	2.13594
5.95	-58.136	-58.0749	-58.197		-58.136	2.44169
6	-58.0444	-58.0444	-58.0444		-58.0444	-2.441
6.05	-58.3801	-57.6477	-57.6782		-58.3801	-3.05206
6.10001	-58.3496	-57.9529	-58.197		-58.3496	3.66328
6.14999	-58.0139	-58.0444	-58.2581		-58.0139	3.96822
6.2	-57.9529	-58.0139	-57.9834		-57.9529	-3.96712
6.25	-58.4106	-57.7087	-57.8003		-58.4106	-3.357
6.3	-58.2886	-57.9224	-58.1055		-58.2886	3.35657
6.35001	-58.0749	-58.1055	-58.1665		-58.0749	2.74682
6.39999	-58.0139	-57.9529	-57.9834		-58.0139	-3.96684
6.45	-58.4717	-57.6477	-57.7087		-58.4717	-3.96608
6.5	-58.4106	-57.8918	-58.136		-58.4106	3.968
6.55	-58.0749	-58.136	-58.1665		-58.0749	4.27182
6.60001	-57.9834	-57.9834	-57.9529		-57.9834	-3.05377
6.64999	-58.3801	-57.7087	-57.8003		-58.3801	-3.66365
6.7	-58.3496	-57.8613	-58.136		-58.3496	3.05194
6.75	-58.0749	-58.136	-58.2275		-58.0749	3.662
6.8	-57.9834	-58.1055	-58.1055		-57.9834	-1.52551
6.85001	-58.2275	-57.8613	-57.8308		-58.2275	-3.662
6.89999	-58.3496	-57.8003	-58.1665		-58.3496	0.609145
6.95	-58.1665	-58.0749	-58.1665		-58.1665	4.57763
7	-57.8918	-58.0749	-58.1055		-57.8918	0.916
7.05	-58.0749	-58.0139	-57.8003		-58.0749	-5.18733
7.10001	-58.4106	-57.6477	-58.0749		-58.4106	-1.83072
7.14999	-58.2581	-57.8918	-58.1665		-58.2581	4.27206
7.2	-57.9834	-58.0139	-58.1665		-57.9834	2.44145
7.25	-58.0139	-58.0139	-57.8308		-58.0139	-3.357
7.3	-58.3191	-57.8613	-58.0139		-58.3191	-2.44212
7.35001	-58.2581	-57.6172	-58.3191		-58.2581	1.52624
7.39999	-58.1665	-57.9224	-58.2581		-58.1665	5.18751
7.45	-57.7393	-58.0139	-58.1055		-57.7393	2.13515
7.5	-57.9529	-58.0749	-57.8308		-57.9529	-5.188
7.55	-58.2581	-57.8308	-58.197		-58.2581	-2.13618
7.60001	-58.1665	-57.7087	-58.3496		-58.1665	2.74755
7.64999	-57.9834	-58.0749	-58.1055		-57.9834	3.35743
7.7	-57.8308	-58.0139	-57.8308		-57.8308	-2.74731
7.75	-58.2581	-57.7087	-58.0444		-58.2581	-3.967
7.8	-58.2275	-57.7698	-58.1665		-58.2275	1.83169
7.85001	-58.0749	-57.9834	-58.1055		-58.0749	4.88304
7.89999	-57.7393	-57.7087	-57.8003		-57.7393	-1.82962
7.95	-58.2581	-57.5867	-58.3191		-58.2581	-5.18696
8	-58.2581	-57.9224	-58.1665		-58.2581	3.663
8.05	-57.8918	-57.7087	-57.9834		-57.8918	1.83237
8.10001	-58.0749	-57.7393	-58.3801		-58.0749	-2.747
8.14999	-58.1665	-57.9224	-57.9529		-58.1665	4.2706
8.2	-57.6477	-57.4646	-58.2581		-57.6477	0.303963
8.25	-58.136	-57.9834	-58.2275		-58.136	-3.662
8.3	-58.0139	-57.5867	-57.9529		-58.0139	2.74669
8.35001	-57.8613	-57.9529	-58.3191		-57.8613	-1.83265
8.39999	-58.197	-57.8003	-57.8003		-58.197	1.21774
8.45	-57.7393	-57.8613	-58.2581		-57.7393	-0.611915
8.5	-58.2581	-57.8308	-57.8308		-58.2581	-0.305
8.55	-57.7698	-57.6172	-58.2886		-57.7698	0.611854
8.60001	-58.197	-57.9529	-57.8918		-58.197	-1.21792
8.64999	-57.8918	-57.5561	-58.3191		-57.8918	0.00183157
8.7	-58.197	-57.8918	-57.9529		-58.197	-0.91539
8.75	-57.9834	-57.373	-58.4412		-57.9834	1.221
8.8	-58.0749	-58.0139	-58.0444		-58.0749	-0.305122
8.85001	-58.0139	-57.4951	-58.3191		-58.0139	0.609878
8.89999	-58.0139	-57.9224	-58.1055		-58.0139	-0.915817
8.95	-58.1055	-57.4646	-58.3801		-58.1055	1.52618
9	-57.8613	-58.0139	-58.136		-57.8613	-0.915
9.05	-58.197	-57.5867	-58.2581		-58.197	-0.000671
9.10001	-57.8613	-57.9224	-58.197		-57.8613	0.913352
9.14999	-58.1055	-57.6782	-58.1665		-58.1055	1.52423
9.2	-57.7087	-57.7393	-58.3191		-57.7087	-1.22079
9.25	-58.2275	-57.7698	-58.0139		-58.2275	0.305
9.3	-57.6782	-57.4951	-58.3191		-57.6782	0.610976
9.35001	-58.1665	-57.8308	-57.9529		-58.1665	-1.52368
9.39999	-57.8308	-57.3425	-58.4412		-57.8308	1.22277
9.45	-58.0444	-58.0139	-57.9529		-58.0444	-2.13557
9.5	-58.0444	-57.6782	-58.3191		-58.0444	1.526
9.55	-57.8918	-57.6782	-58.2886		-57.8918	-0.610573
9.60001	-58.1055	-57.8308	-58.136		-58.1055	1.22177
9.64999	-57.7698	-57.4341	-58.3801		-57.7698	-1.82862
9.7	-58.2886	-57.9834	-57.8308		-58.2886	-2.74496
9.75	-58.0444	-57.6172	-58.3496		-58.0444	2.442
9.8	-58.0444	-57.7393	-58.0444		-58.0444	-0.915817
9.85001	-58.136	-57.8613	-58.2275		-58.136	2.44253
9.89999	-57.8003	-57.4036	-58.2581		-57.8003	-1.82862
9.95	-58.3191	-57.9224	-57.8003		-58.3191	-1.82996
10	-57.9834	-57.6172	-58.4717		-57.9834	3.357
10.05	-57.9834	-57.5256	-58.136		-57.9834	-2.441
10.1	-58.2275	-57.8308	-58.1665		-58.2275	3.052
10.15	-57.6782	-57.4951	-58.3496		-57.6782	-0.611
10.2	-58.2886	-57.8613	-57.9834		-58.2886	-4.273
10.25	-58.1055	-57.8308	-58.3801		-58.1055	4.578
10.3	-57.8308	-57.5561	-58.2581		-57.8308	-1.526
10.35	-58.2581	-57.9529	-58.0749		-58.2581	-0.916
10.4	-57.9224	-57.7087	-58.3191		-57.9224	1.526
10.45	-58.1055	-57.6172	-57.8613		-58.1055	-2.746
10.5	-58.197	-57.8918	-58.3191		-58.197	3.052
10.55	-57.8003	-57.5256	-58.3801		-57.8003	-1.221
10.6	-58.3191	-57.8308	-57.9224		-58.3191	-2.746
10.65	-58.0749	-57.8308	-58.4717		-58.0749	4.578
10.7	-57.8613	-57.4036	-58.197		-57.8613	-1.221
10.75	-58.197	-57.9529	-58.1665		-58.197	-0.916
10.8	-57.9529	-57.8308	-58.4106		-57.9529	2.136
10.85	-57.9834	-57.5561	-58.0749		-57.9834	-2.441
10.9	-58.197	-58.0139	-58.3496		-58.197	2.441
10.95	-57.7393	-57.8918	-58.4106		-57.7393	1.63e-13
11	-58.197	-57.6782	-57.8918		-58.197	-4.882
11.05	-58.2275	-58.0139	-58.4717		-58.2275	4.883
11.1	-57.7087	-57.7087	-58.2275		-57.7087	-0.916
11.15	-58.3191	-57.8003	-58.0444		-58.3191	-5.188
11.2	-58.2275	-58.0444	-58.4106		-58.2275	3.967
11.25	-57.9224	-57.7698	-58.0749		-57.9224	-0.306
11.3	-58.2581	-57.8613	-58.2581		-58.2581	-1.525
11.35	-58.0749	-57.9529	-58.4106		-58.0749	3.052
11.4	-57.9529	-57.6172	-58.0139		-57.9529	-1.832
11.45	-58.2581	-57.8613	-58.2581		-58.2581	-0.61
11.5	-58.0139	-57.9834	-58.5022		-58.0139	3.357
11.55	-57.9224	-57.6477	-58.0749		-57.9224	-2.136
11.6	-58.2275	-58.0139	-58.3801		-58.2275	-1.525
11.65	-58.0749	-58.0749	-58.3496		-58.0749	1.831
11.7	-58.0444	-57.6782	-57.8918		-58.0444	-1.526
11.75	-58.2275	-57.9529	-58.3801		-58.2275	0
11.8	-58.0444	-58.0444	-58.3801		-58.0444	1.526
11.85	-58.0749	-57.6782	-58.0139		-58.0749	-3.052
11.9	-58.3496	-58.0139	-58.3496		-58.3496	0.61
11.95	-58.0139	-57.9834	-58.3496		-58.0139	3.052
12	-58.0444	-57.6782	-57.9834		-58.0444	-2.747
12.05	-58.2886	-57.9834	-58.4717		-58.2886	8.66e-14
12.1	-58.0444	-58.0444	-58.3801		-58.0444	1.831
12.15	-58.1055	-57.7393	-57.9224		-58.1055	-2.747
12.2	-58.3191	-57.8918	-58.4717		-58.3191	-0.61
12.25	-58.1665	-58.1055	-58.3801		-58.1665	2.442
12.3	-58.0749	-57.9834	-57.8918		-58.0749	-1.831
12.35	-58.3496	-57.8003	-58.3496		-58.3496	-0.611
12.4	-58.136	-58.0749	-58.2886		-58.136	3.967
12.45	-57.9529	-57.9224	-57.8918		-57.9529	-2.746
12.5	-58.4106	-57.5867	-58.2886		-58.4106	-3.052
12.55	-58.2581	-58.0749	-58.2886		-58.2581	6.713
12.6	-57.7393	-58.0139	-58.0139		-57.7393	1.832
12.65	-58.0749	-57.5867	-58.2886		-58.0749	-3.662
12.7	-58.1055	-57.9834	-58.2275		-58.1055	5.188
12.75	-57.5561	-58.0444	-58.0444		-57.5561	2.747
12.8	-57.8308	-57.7393	-58.197		-57.8308	-2.442
12.85	-57.8003	-57.8613	-58.3801		-57.8003	3.967
12.9	-57.4341	-58.197	-58.1055		-57.4341	3.357
12.95	-57.4646	-58.0749	-57.9224		-57.4646	-1.526
13	-57.5867	-57.7087	-58.2886		-57.5867	1.526
13.05	-57.312	-58.0444	-58.1055		-57.312	6.714
13.1	-56.9153	-58.0444	-57.8308		-56.9153	0.305
13.15	-57.2815	-57.7698	-58.2581		-57.2815	-1.831
13.2	-57.0984	-58.0139	-58.197		-57.0984	6.714
13.25	-56.6101	-58.1055	-57.8613		-56.6101	4.273
13.3	-56.6711	-57.7698	-58.197		-56.6711	-0.916
13.35	-56.7017	-57.7698	-58.136		-56.7017	4.272
13.4	-56.2439	-58.0444	-58.0139		-56.2439	5.799
13.45	-56.1218	-57.9224	-58.0139		-56.1218	-0.61
13.5	-56.3049	-57.4646	-58.3496		-56.3049	0.915
13.55	-56.0303	-57.7698	-58.1055		-56.0303	7.019
13.6	-55.603	-57.8918	-57.7393		-55.603	2.747
13.65	-55.7556	-57.5561	-58.1665		-55.7556	-0.916
13.7	-55.6946	-57.1594	-58.1055		-55.6946	4.272
13.75	-55.3284	-57.5561	-57.8613		-55.3284	5.493
13.8	-55.1453	-57.4036	-57.8003		-55.1453	-6.51e-14
13.85	-55.3284	-57.1594	-58.0139		-55.3284	-0.305
13.9	-55.1758	-56.9153	-58.0444		-55.1758	5.799
13.95	-54.7485	-57.1289	-57.5256		-54.7485	5.493
14	-54.6265	-57.1289	-57.8613		-54.6265	-0.611
14.05	-54.8096	-56.5796	-57.8613		-54.8096	0.916
14.1	-54.5349	-56.6711	-57.6782		-54.5349	8.24
14.15	-53.9856	-56.8237	-57.4951		-53.9856	3.662
14.2	-54.1687	-56.7322	-57.7087		-54.1687	-2.441
14.25	-54.2297	-56.3354	-57.6477		-54.2297	2.136
14.3	-53.9551	-56.3049	-57.2815		-53.9551	7.019
14.35	-53.5278	-56.3965	-57.251		-53.5278	1.831
14.4	-53.772	-56.2439	-57.4951		-53.772	-1.831
14.45	-53.7109	-55.7861	-57.3425		-53.7109	3.662
14.5	-53.4058	-56.0608	-56.8848		-53.4058	6.714
14.55	-53.0395	-56.0608	-57.251		-53.0395	1.831
14.6	-53.2227	-55.7556	-57.251		-53.2227	-0.306
14.65	-53.0701	-55.3894	-57.0679		-53.0701	3.357
14.7	-52.887	-55.542	-56.7017		-52.887	5.494
14.75	-52.5207	-55.603	-56.9153		-52.5207	1.221
14.8	-52.7649	-55.481	-57.0373		-52.7649	-0.611
14.85	-52.5818	-55.1453	-56.7627		-52.5818	3.967
14.9	-52.3682	-55.0842	-56.3965		-52.3682	6.409
14.95	-51.9409	-55.2063	-56.6711		-51.9409	1.526
15	-52.2156	-55.0232	-56.7322		-52.2156	-2.747
15.05	-52.2156	-54.6875	-56.6101		-52.2156	2.442
15.1	-51.9714	-54.4128	-56.0913		-51.9714	5.493
15.15	-51.6663	-54.7485	-56.3354		-51.6663	3.662
15.2	-51.6052	-54.5959	-56.5491		-51.6052	-0.61
15.25	-51.7273	-54.3823	-56.366		-51.7273	0.61
15.3	-51.5442	-53.9856	-55.9692		-51.5442	5.798
15.35	-51.1475	-54.1687	-56.0303		-51.1475	4.578
15.4	-51.0864	-54.2603	-56.3049		-51.0864	-1.525
15.45	-51.3	-54.0466	-56.1829		-51.3	-7.59e-14
15.5	-51.0864	-53.772	-55.8472		-51.0864	3.967
15.55	-50.9033	-53.6194	-55.6946		-50.9033	5.798
15.6	-50.5066	-53.7415	-55.9692		-50.5066	1.526
15.65	-50.7507	-53.5889	-55.8472		-50.7507	-3.357
15.7	-50.8423	-53.4058	-55.6641		-50.8423	1.22
15.75	-50.6287	-53.009	-55.3284		-50.6287	5.493
15.8	-50.293	-53.1006	-55.5115		-50.293	4.578
15.85	-50.1709	-53.1921	-55.8777		-50.1709	-0.305
15.9	-50.3235	-52.948	-55.542		-50.3235	-0.915
15.95	-50.2624	-52.7649	-55.2368		-50.2624	3.052
16	-50.0183	-52.5207	-55.2368		-50.0183	6.103
16.05	-49.6521	-52.7954	-55.5115		-49.6521	1.831
16.1	-49.8352	-52.6123	-55.4199		-49.8352	-2.136
16.15	-49.8657	-52.2461	-54.9011		-49.8657	1.221
16.2	-49.7131	-52.4597	-55.0537		-49.7131	6.409
16.25	-49.2248	-52.3682	-55.1147		-49.2248	1.831
16.3	-49.53	-52.0019	-54.6265		-49.53	-2.442
16.35	-49.469	-52.0325	-54.9011		-49.469	5.188
16.4	-49.0112	-52.0019	-54.9316		-49.0112	2.747
16.45	-49.1943	-51.5442	-54.3823		-49.1943	-1.831
16.5	-49.1943	-51.8188	-54.8401		-49.1943	5.188
16.55	-48.6755	-51.4221	-54.5349		-48.6755	1.831
16.6	-49.0112	-51.5137	-54.5044		-49.0112	-0.611
16.65	-48.7366	-51.5137	-54.5959		-48.7366	4.272
16.7	-48.584	-51.178	-54.1382		-48.584	0
16.75	-48.7366	-51.4221	-54.5349		-48.7366	4.578
16.8	-48.1262	-50.8728	-53.9551		-48.1262	2.747
16.85	-48.4619	-51.2695	-54.2908		-48.4619	2.441
16.9	-47.8821	-50.5981	-53.7415		-47.8821	1.831
16.95	-48.2788	-51.0559	-54.1382		-48.2788	2.136
17	-47.6685	-50.5066	-53.6194		-47.6685	1.831
17.05	-48.0957	-50.9033	-54.0161		-48.0957	2.137
17.1	-47.4548	-50.354	-53.4058		-47.4548	4.578
17.15	-47.6379	-50.6897	-53.8635		-47.6379	2.136
17.2	-47.2412	-50.293	-53.4363		-47.2412	2.746
17.25	-47.3633	-50.5066	-53.772		-47.3633	3.357
17.3	-46.9055	-50.2014	-53.3447		-46.9055	3.662
17.35	-46.9971	-50.2624	-53.6804		-46.9971	3.052
17.4	-46.6003	-50.0793	-53.4058		-46.6003	5.493
17.45	-46.4478	-50.0488	-53.3752		-46.4478	3.051
17.5	-46.2952	-50.1099	-53.1616		-46.2952	5.494
17.55	-45.8984	-49.6216	-53.1921		-45.8984	3.968
17.6	-45.8984	-49.8657	-53.0701		-45.8984	5.493
17.65	-45.3491	-49.3774	-52.7344		-45.3491	3.662
17.7	-45.5322	-49.7436	-52.887		-45.5322	5.493
17.75	-44.7998	-49.469	-52.3987		-44.7998	7.324
17.8	-44.7998	-49.2554	-52.887		-44.7998	6.104
17.85	-44.1894	-49.3774	-52.4902		-44.1894	7.935
17.9	-44.0063	-48.7976	-52.6428		-44.0063	6.713
17.95	-43.5181	-49.1943	-52.4902		-43.5181	12.817
18	-42.7246	-48.8586	-52.3376		-42.7246	12.513
18.05	-42.2668	-48.9197	-52.5513		-42.2668	18.31
18.1	-40.8936	-49.0112	-51.9104		-40.8936	19.836
18.15	-40.2832	-48.4314	-52.3682		-40.2832	26.246
18.2	-38.269	-48.7366	-52.0935		-38.269	51.88
18.25	-35.0952	-48.4009	-51.9714		-35.0952	81.482
18.3	-30.1208	-48.4009	-52.1545		-30.1208	133.362
18.35	-21.759	-48.4924	-51.5442		-21.759	183.715
18.4	-11.7493	-47.9736	-51.9409		-11.7493	227.966
18.45	1.0376	-48.2788	-51.7578		1.0376	266.724
18.5	14.9231	-48.0652	-51.4832		14.9231	267.334
18.55	27.771	-47.8516	-51.6968		27.771	250.854
18.6	40.0085	-48.0652	-51.2695		40.0085	215.454
18.65	49.3164	-47.5769	-51.5442		49.3164	156.556
18.7	55.6641	-47.8516	-51.5137		55.6641	97.961
18.75	59.1125	-47.9126	-50.9949		59.1125	23.498
18.8	58.0139	-47.3938	-51.3611		58.0139	-47.912
18.85	54.3213	-47.76	-51.0559		54.3213	-97.046
18.9	48.3093	-47.5159	-51.1169		48.3093	-150.452
18.95	39.2761	-47.3328	-51.239		39.2761	-188.598
19	29.4495	-47.5464	-50.6592		29.4495	-203.247
19.05	18.9514	-47.1802	-51.0559		18.9514	-216.98
19.1	7.75146	-47.1802	-50.9033		7.75146	-216.064
19.15	-2.65503	-47.1802	-50.6592		-2.65503	-205.689
19.2	-12.8174	-46.7529	-50.9949		-12.8174	-199.89
19.25	-22.644	-47.0276	-50.6897		-22.644	-184.631
19.3	-31.2805	-46.9055	-50.8728		-31.2805	-168.457
19.35	-39.4897	-46.3867	-51.0559		-39.4897	-158.081
19.4	-47.0886	-46.875	-50.4761		-47.0886	-140.992
19.45	-53.5889	-46.6003	-50.9338		-53.5889	-125.427
19.5	-59.6313	-46.1121	-50.9033		-59.6313	-115.661
19.55	-65.155	-46.3562	-50.4456		-65.155	-99.183
19.6	-69.5496	-46.0815	-50.9338		-69.5496	-84.839
19.65	-73.6389	-45.7153	-50.6897		-73.6389	-75.073
19.7	-77.0569	-45.929	-50.4456		-77.0569	-57.983
19.75	-79.4372	-45.4102	-50.8118		-79.4372	-43.64
19.8	-81.4209	-45.105	-50.5066		-81.4209	-37.842
19.85	-83.2214	-45.227	-50.5371		-83.2214	-27.466
19.9	-84.1675	-44.7388	-50.6897		-84.1675	-13.428
19.95	-84.5642	-44.4336	-50.5066		-84.5642	-11.596
20	-85.3271	-44.3726	-50.6897		-85.3271	-8.24
20.05	-85.3882	-43.9148	-50.7202		-85.3882	3.967
20.1	-84.9304	-43.5486	-50.3235		-84.9304	1.221
20.15	-85.2661	-43.3044	-50.6592		-85.2661	0.61
20.2	-84.8694	-42.572	-50.6897		-84.8694	9.46
20.25	-84.3201	-41.8701	-50.2624		-84.3201	7.935
20.3	-84.0759	-41.3513	-50.6592		-84.0759	3.663
20.35	-83.9538	-39.8865	-50.6287		-83.9538	7.324
20.4	-83.3435	-38.147	-50.2624		-83.3435	14.038
20.45	-82.55	-35.4919	-50.7202		-82.55	6.714
20.5	-82.6721	-30.3955	-50.7202		-82.6721	2.746
20.55	-82.2754	-22.6746	-50.354		-82.2754	11.902
20.6	-81.4819	-12.7563	-50.8423		-81.4819	11.597
20.65	-81.1157	-0.183105	-50.9033		-81.1157	4.272
20.7	-81.0547	13.3362	-50.354		-81.0547	6.409
20.75	-80.4748	26.2756	-50.8423		-80.4748	12.512
20.8	-79.8035	38.3911	-50.9644		-79.8035	6.408
20.85	-79.834	48.4009	-50.5371		-79.834	3.052
20.9	-79.4983	54.9316	-50.8728		-79.4983	7.63
20.95	-79.071	58.197	-50.9338		-79.071	8.545
21	-78.6438	58.3191	-50.5981		-78.6438	4.272
21.05	-78.6438	55.2978	-50.8423		-78.6438	4.273
21.1	-78.2165	48.8586	-51.0559		-78.2165	10.071
21.15	-77.6367	40.7715	-50.8728		-77.6367	4.882
21.2	-77.7283	31.4331	-50.9338		-77.7283	1.526
21.25	-77.4841	20.5078	-51.3611		-77.4841	7.325
21.3	-76.9958	9.64355	-51.178		-76.9958	10.071
21.35	-76.477	-1.0376	-50.9033		-76.477	3.662
21.4	-76.6296	-11.1084	-51.4832		-76.6296	0.915
21.45	-76.3855	-21.1182	-51.3916		-76.3855	7.629
21.5	-75.8667	-30.0598	-51.0559		-75.8667	8.85
21.55	-75.5005	-38.0554	-51.5442		-75.5005	2.136
21.6	-75.6531	-45.6238	-51.5442		-75.6531	2.442
21.65	-75.2563	-52.7954	-51.3		-75.2563	9.766
21.7	-74.6765	-58.7769	-51.6357		-74.6765	6.408
21.75	-74.6155	-63.9038	-51.8799		-74.6155	-0.305
21.8	-74.707	-68.7866	-51.7883		-74.707	2.442
21.85	-74.3713	-73.1506	-51.6663		-74.3713	9.765
21.9	-73.7305	-76.3245	-52.2766		-73.7305	5.188
21.95	-73.8525	-78.7048	-52.3376		-73.8525	-0.61
22	-73.7915	-81.1462	-52.0019		-73.7915	3.967
22.05	-73.4558	-82.9468	-52.4292		-73.4558	9.46
22.1	-72.8455	-83.9844	-52.7039		-72.8455	4.272
22.15	-73.0286	-84.4116	-52.5513		-73.0286	-1.3e-13
22.2	-72.8455	-85.0525	-52.5818		-72.8455	4.273
22.25	-72.6013	-85.5713	-52.9785		-72.6013	7.63
22.3	-72.0825	-85.5713	-53.0395		-72.0825	3.052
22.35	-72.2961	-85.083	-52.7954		-72.2961	-0.61
22.4	-72.1435	-84.7473	-53.2227		-72.1435	3.051
22.45	-71.991	-84.7168	-53.5583		-71.991	7.324
22.5	-71.4111	-84.4726	-53.4668		-71.4111	4.883
22.55	-71.5027	-83.9538	-53.4058		-71.5027	-1.831
22.6	-71.5942	-83.3435	-53.894		-71.5942	1.831
22.65	-71.3196	-83.1299	-54.0161		-71.3196	7.324
22.7	-70.8618	-82.8857	-53.9551		-70.8618	4.883
22.75	-70.8313	-82.428	-54.0771		-70.8313	0.305
22.8	-70.8313	-81.8787	-54.5044		-70.8313	1.526
22.85	-70.6787	-81.2378	-54.5959		-70.6787	6.104
22.9	-70.2209	-81.1768	-54.3518		-70.2209	6.103
22.95	-70.0684	-80.9631	-54.5349		-70.0684	0
23	-70.2209	-80.4748	-54.9011		-70.2209	1.221
23.05	-69.9463	-79.9255	-54.9622		-69.9463	4.882
23.1	-69.7327	-79.4372	-54.7485		-69.7327	5.799
23.15	-69.3664	-79.4067	-54.9316		-69.3664	2.137
23.2	-69.519	-79.1931	-55.4504		-69.519	-1.832
23.25	-69.5496	-78.7964	-55.4199		-69.5496	2.136
23.3	-69.3054	-78.3386	-55.2368		-69.3054	6.714
23.35	-68.8782	-77.9114	-55.542		-68.8782	5.188
23.4	-68.7866	-77.9419	-55.9387		-68.7866	0.306
23.45	-68.8476	-77.7588	-55.9692		-68.8476	1.526
23.5	-68.634	-77.4536	-55.7861		-68.634	4.272
23.55	-68.4204	-76.9958	-55.8777		-68.4204	5.798
23.6	-68.0542	-76.5991	-56.3354		-68.0542	2.441
23.65	-68.1763	-76.5686	-56.427		-68.1763	-1.526
23.7	-68.2068	-76.4465	-56.2439		-68.2068	1.221
23.75	-68.0542	-76.1413	-56.1829		-68.0542	3.967
23.8	-67.8101	-75.7446	-56.6406		-67.8101	6.104
23.85	-67.4438	-75.2869	-56.8237		-67.4438	1.526
23.9	-67.6575	-75.2869	-56.6711		-67.6575	-3.052
23.95	-67.749	-75.3174	-56.5186		-67.749	1.221
24	-67.5354	-74.9817	-56.9458		-67.5354	4.883
24.05	-67.2607	-74.646	-57.2815		-67.2607	6.104
24.1	-66.925	-74.2187	-57.312		-66.925	2.136
24.15	-67.0471	-74.1577	-56.9763		-67.0471	-1.831
24.2	-67.1081	-74.1882	-57.0679		-67.1081	0.915
24.25	-66.9556	-73.822	-57.4646		-66.9556	4.577
24.3	-66.6504	-73.5168	-57.5256		-66.6504	5.188
24.35	-66.4368	-72.998	-57.4036		-66.4368	-0.61
24.4	-66.7114	-73.0591	-57.251		-66.7114	-2.441
24.45	-66.6809	-73.0591	-57.7087		-66.6809	2.136
24.5	-66.4978	-72.6929	-57.8918		-66.4978	5.798
24.55	-66.1011	-72.1741	-57.5256		-66.1011	4.273
24.6	-66.0705	-72.5098	-57.8613		-66.0705	-1.831
24.65	-66.2842	-72.2961	-58.0444		-66.2842	-0.611
24.7	-66.1316	-71.6553	-57.7393		-66.1316	8.24
24.75	-65.4602	-71.9604	-58.1665		-65.4602	3.357
24.8	-65.7959	-71.7468	-58.136		-65.7959	-3.052
24.85	-65.7654	-71.3196	-57.8613		-65.7654	6.409
24.9	-65.155	-71.3806	-58.3191		-65.155	1.526
24.95	-65.6128	-70.7703	-57.9529		-65.6128	-1.221
25	-65.2771	-71.0754	-58.4106		-65.2771	2.747
25.05	-65.3381	-70.6787	-58.1665		-65.3381	-1.221
25.1	-65.3992	-70.5261	-58.4106		-65.3992	5.493
25.15	-64.7888	-70.4651	-58.4106		-64.7888	2.442
25.2	-65.155	-69.9463	-58.5327		-65.155	0.915
25.25	-64.6973	-70.282	-58.5022		-64.6973	1.831
25.3	-64.9719	-69.6716	-58.5327		-64.9719	0
25.35	-64.6973	-70.0073	-58.7158		-64.6973	2.136
25.4	-64.7583	-69.4885	-58.5937		-64.7583	1.221
25.45	-64.5752	-69.7327	-58.8379		-64.5752	0.916
25.5	-64.6667	-69.458	-58.5327		-64.6667	0.305
25.55	-64.5447	-69.397	-58.8684		-64.5447	3.357
25.6	-64.331	-69.2444	-58.5632		-64.331	0.611
25.65	-64.4836	-68.9087	-58.8989		-64.4836	3.051
25.7	-64.0259	-69.0308	-58.5327		-64.0259	0.915
25.75	-64.3921	-68.512	-58.9294		-64.3921	2.136
25.8	-63.8123	-68.7256	-58.5937		-63.8123	2.442
25.85	-64.1479	-68.2373	-59.082		-64.1479	2.38e-13
25.9	-63.8123	-68.573	-58.5632		-63.8123	0.915
25.95	-64.0564	-68.4204	-59.1736		-64.0564	0
26	-63.8123	-68.0542	-58.9294		-63.8123	3.662
26.05	-63.6902	-68.2373	-59.1431		-63.6902	0.611
26.1	-63.7512	-67.8406	-59.1431		-63.7512	3.357
26.15	-63.3545	-68.1457	-58.8684		-63.3545	0.61
26.2	-63.6902	-67.8711	-59.1431		-63.6902	0
26.25	-63.3545	-67.5354	-58.6853		-63.3545	1.831
26.3	-63.5071	-67.7185	-59.2651		-63.5071	-2.136
26.35	-63.5681	-67.2913	-59.021		-63.5681	3.968
26.4	-63.1103	-67.4744	-58.9905		-63.1103	1.831
26.45	-63.385	-67.4133	-59.2346		-63.385	0.61
26.5	-63.0493	-66.8335	-58.8989		-63.0493	2.441
26.55	-63.1409	-67.4438	-59.3567		-63.1409	-0.916
26.6	-63.1409	-67.1081	-59.082		-63.1409	5.188
26.65	-62.6221	-66.7419	-59.2957		-62.6221	0.916
26.7	-63.0493	-67.1081	-59.4482		-63.0493	-0.915
26.75	-62.7136	-66.6809	-58.96		-62.7136	5.493
26.8	-62.5	-66.7419	-59.4482		-62.5	-0.305
26.85	-62.7441	-66.7725	-59.2651		-62.7441	0.916
26.9	-62.4084	-66.2842	-59.1736		-62.4084	1.22
26.95	-62.6221	-66.5588	-59.4482		-62.6221	-2.442
27	-62.6526	-66.4368	-58.9905		-62.6526	4.578
27.05	-62.1643	-65.979	-59.4482		-62.1643	0.305
27.1	-62.6221	-66.3452	-59.4482		-62.6221	-3.052
27.15	-62.4695	-66.1621	-59.1431		-62.4695	4.883
27.2	-62.1338	-65.8264	-59.5398		-62.1338	0.305
27.25	-62.439	-66.1621	-59.2957		-62.439	0.305
27.3	-62.1033	-65.918	-59.4482		-62.1033	3.662
27.35	-62.0728	-65.6738	-59.6619		-62.0728	-0.61
27.4	-62.1643	-66.0095	-59.1125		-62.1643	2.137
27.45	-61.8591	-65.7959	-59.5703		-61.8591	0.915
27.5	-62.0728	-65.4602	-59.5093		-62.0728	-2.137
27.55	-62.0728	-65.7349	-59.1736		-62.0728	4.883
27.6	-61.5845	-65.4602	-59.6619		-61.5845	-0.61
27.65	-62.1338	-65.2771	-59.3872		-62.1338	-4.883
27.7	-62.0728	-65.5518	-59.3872		-62.0728	6.714
27.75	-61.4624	-65.0635	-59.6924		-61.4624	0.916
27.8	-61.9812	-65.094	-59.3262		-61.9812	-3.967
27.85	-61.8591	-65.3686	-59.5703		-61.8591	5.798
27.9	-61.4014	-65.033	-59.6008		-61.4014	-0.305
27.95	-61.8896	-64.9414	-59.2041		-61.8896	-1.831
28	-61.5845	-65.094	-59.7229		-61.5845	6.408
28.05	-61.2488	-64.9109	-59.6008		-61.2488	-0.915
28.1	-61.676	-64.7888	-59.1736		-61.676	-2.136
28.15	-61.4624	-64.9109	-59.6619		-61.4624	5.493
28.2	-61.1267	-64.6362	-59.4482		-61.1267	0
28.25	-61.4624	-64.4836	-59.2957		-61.4624	-2.747
28.3	-61.4014	-64.7278	-59.6008		-61.4014	3.662
28.35	-61.0962	-64.4836	-59.4788		-61.0962	-0.61
28.4	-61.4624	-64.209	-59.3567		-61.4624	-2.136
28.45	-61.3098	-64.5447	-59.6619		-61.3098	4.883
28.5	-60.9741	-64.4531	-59.4788		-60.9741	-0.61
28.55	-61.3708	-63.9648	-59.3872		-61.3708	-2.442
28.6	-61.2183	-64.3616	-59.7839		-61.2183	6.103
28.65	-60.7605	-64.3005	-59.5398		-60.7605	3.25e-13
28.7	-61.2183	-63.9038	-59.4177		-61.2183	-3.662
28.75	-61.1267	-64.2395	-59.6924		-61.1267	5.188
28.8	-60.6995	-64.0869	-59.4788		-60.6995	0.61
28.85	-61.0657	-63.7207	-59.3872		-61.0657	-3.662
28.9	-61.0657	-63.9038	-59.6619		-61.0657	4.273
28.95	-60.6384	-64.0259	-59.4177		-60.6384	0.916
29	-60.9741	-63.7207	-59.2651		-60.9741	-3.357
29.05	-60.9741	-63.5986	-59.7534		-60.9741	2.746
29.1	-60.6995	-63.8428	-59.4788		-60.6995	2.441
29.15	-60.73	-63.8428	-59.2957		-60.73	-2.441
29.2	-60.9436	-63.2629	-59.6924		-60.9436	1.221
29.25	-60.6079	-63.6902	-59.5093		-60.6079	4.883
29.3	-60.4553	-63.6597	-59.2346		-60.4553	-1.831
29.35	-60.791	-63.3545	-59.6313		-60.791	-2.136
29.4	-60.6689	-63.4766	-59.5398		-60.6689	5.493
29.45	-60.2417	-63.5986	-59.1125		-60.2417	0
29.5	-60.6689	-63.2629	-59.5093		-60.6689	-3.357
29.55	-60.5774	-62.9883	-59.6008		-60.5774	3.967
29.6	-60.2722	-63.3545	-59.1736		-60.2722	1.221
29.65	-60.4553	-63.2324	-59.3567		-60.4553	-1.831
29.7	-60.4553	-62.8662	-59.5093		-60.4553	0.915
29.75	-60.3638	-62.9578	-59.2651		-60.3638	3.052
29.8	-60.1501	-63.1714	-59.2041		-60.1501	-1.22
29.85	-60.4858	-63.0188	-59.5398		-60.4858	-2.137
29.9	-60.3638	-62.6221	-59.4482		-60.3638	6.103
29.95	-59.8755	-62.9578	-59.2041		-59.8755	2.137
30	-60.1501	-63.0493	-59.5398		-60.1501	-4.272
30.05	-60.3027	-62.8052	-59.4482		-60.3027	1.22
30.1	-60.0281	-62.5	-59.1431		-60.0281	4.272
30.15	-59.8755	-62.8357	-59.1736		-59.8755	-1.22
30.2	-60.1501	-62.8052	-59.4788		-60.1501	-3.357
30.25	-60.2112	-62.4084	-59.1736		-60.2112	2.441
30.3	-59.906	-62.6526	-58.9294		-59.906	2.442
30.35	-59.967	-62.6221	-59.5093		-59.967	-2.136
30.4	-60.1196	-62.561	-59.3567		-60.1196	-0.916
30.45	-60.0586	-62.1338	-59.021		-60.0586	4.577
30.5	-59.6619	-62.4084	-59.2346		-59.6619	0.916
30.55	-59.967	-62.5	-59.4788		-59.967	-2.746
30.6	-59.9365	-62.4084	-59.2651		-59.9365	2.441
30.65	-59.7229	-62.0728	-58.9294		-59.7229	4.272
30.7	-59.5093	-62.4084	-59.2957		-59.5093	-2.136
30.75	-59.9365	-62.3169	-59.2651		-59.9365	-2.746
30.8	-59.7839	-62.1643	-59.021		-59.7839	3.662
30.85	-59.5703	-61.9202	-59.021		-59.5703	1.22
30.9	-59.6619	-62.1643	-59.2651		-59.6619	-3.662
30.95	-59.9365	-62.2253	-59.1736		-59.9365	-1.22
31	-59.7839	-61.9202	-58.8989		-59.7839	4.272
31.05	-59.5093	-61.5845	-59.0515		-59.5093	1.831
31.1	-59.6008	-61.9812	-59.2651		-59.6008	-4.272
31.15	-59.9365	-62.0117	-59.1125		-59.9365	-1.221
31.2	-59.7229	-61.9202	-58.8074		-59.7229	5.798
31.25	-59.3567	-61.5234	-59.1431		-59.3567	3.357
31.3	-59.3872	-61.8286	-59.2346		-59.3872	-3.357
31.35	-59.6924	-62.0728	-59.0515		-59.6924	-2.441
31.4	-59.6313	-61.7676	-58.7769		-59.6313	3.662
31.45	-59.3262	-61.4014	-59.021		-59.3262	3.662
31.5	-59.2651	-61.4624	-59.1431		-59.2651	-3.662
31.55	-59.6924	-61.676	-58.9294		-59.6924	-3.052
31.6	-59.5703	-61.7065	-58.5327		-59.5703	3.967
31.65	-59.2957	-61.4014	-58.96		-59.2957	3.052
31.7	-59.2651	-61.1267	-59.0515		-59.2651	-2.441
31.75	-59.5398	-61.554	-59.021		-59.5398	-2.747
31.8	-59.5398	-61.4624	-58.5937		-59.5398	1.831
31.85	-59.3567	-61.4014	-58.9294		-59.3567	5.493
31.9	-58.9905	-61.1267	-59.1431		-58.9905	0.916
31.95	-59.2651	-61.2488	-58.9905		-59.2651	-4.272
32	-59.4177	-61.554	-58.6853		-59.4177	-1.221
32.05	-59.3872	-61.4014	-58.8074		-59.3872	3.967
32.1	-59.021	-61.1877	-59.082		-59.021	3.357
32.15	-59.0515	-60.9741	-59.021		-59.0515	-3.662
32.2	-59.3872	-61.2183	-58.7463		-59.3872	-3.357
32.25	-59.3872	-61.3708	-58.5632		-59.3872	2.747
32.3	-59.1125	-61.2183	-58.9905		-59.1125	5.188
32.35	-58.8684	-60.9741	-59.021		-58.8684	-0.306
32.4	-59.1431	-60.9131	-58.8989		-59.1431	-5.188
32.45	-59.3872	-61.0962	-58.5937		-59.3872	-0.61
32.5	-59.2041	-61.1572	-58.8684		-59.2041	5.188
32.55	-58.8684	-61.0962	-59.2041		-58.8684	4.272
32.6	-58.7769	-60.9131	-59.021		-58.7769	-2.747
32.65	-59.1431	-60.8826	-58.8074		-59.1431	-4.577
32.7	-59.2346	-61.1267	-58.7769		-59.2346	0.306
32.75	-59.1125	-61.0352	-59.082		-59.1125	4.883
32.8	-58.7463	-60.6689	-58.96		-58.7463	1.831
32.85	-58.9294	-60.8826	-58.6243		-58.9294	-4.273
32.9	-59.1736	-60.9436	-58.8684		-59.1736	-1.221
32.95	-59.0515	-60.6384	-59.021		-59.0515	4.578
33	-58.7158	-60.6995	-58.6548		-58.7158	0
33.05	-59.0515	-60.791	-58.9905		-59.0515	-3.967
33.1	-59.1125	-60.3332	-58.9905		-59.1125	4.578
33.15	-58.5937	-60.791	-58.7158		-58.5937	1.525
33.2	-58.96	-60.6384	-59.1431		-58.96	-3.357
33.25	-58.9294	-60.6384	-58.7158		-58.9294	3.357
33.3	-58.6243	-60.8215	-59.1125		-58.6243	-0.611
33.35	-58.9905	-60.2417	-58.8989		-58.9905	0.916
33.4	-58.5327	-60.7605	-58.8989		-58.5327	0.611
33.45	-58.9294	-60.1501	-58.9905		-58.9294	-1.831
33.5	-58.7158	-60.6995	-58.6548		-58.7158	0.61
33.55	-58.8684	-60.2417	-58.9294		-58.8684	-0.611
33.6	-58.7769	-60.5469	-58.6548		-58.7769	0.915
33.65	-58.7769	-60.2417	-58.8989		-58.7769	-1.22
33.7	-58.8989	-60.4553	-58.5022		-58.8989	0.611
33.75	-58.7158	-60.2112	-58.8989		-58.7158	0.61
33.8	-58.8379	-60.3332	-58.5327		-58.8379	2.136
33.85	-58.5022	-60.3027	-58.9294		-58.5022	-0.61
33.9	-58.8989	-60.2112	-58.3191		-58.8989	0.305
33.95	-58.4717	-60.4248	-58.8684		-58.4717	0.305
34	-58.8684	-59.9976	-58.3801		-58.8684	0.305
34.05	-58.4412	-60.3027	-58.9294		-58.4412	0.305
34.1	-58.8379	-59.845	-58.3496		-58.8379	0.306
34.15	-58.4106	-60.3027	-58.7769		-58.4106	-0.305
34.2	-58.8684	-59.906	-58.4717		-58.8684	-0.611
34.25	-58.4717	-60.2112	-58.8074		-58.4717	0.305
34.3	-58.8379	-59.967	-58.6243		-58.8379	-2.441
34.35	-58.7158	-59.906	-58.5022		-58.7158	0.61
34.4	-58.7769	-60.0891	-58.7463		-58.7769	-0.611
34.45	-58.7769	-59.5093	-58.4412		-58.7769	4.578
34.5	-58.3191	-59.9976	-58.8989		-58.3191	-0.915
34.55	-58.8684	-59.7839	-58.3496		-58.8684	-0.915
34.6	-58.4106	-59.7534	-58.8074		-58.4106	0.305
34.65	-58.8379	-59.8755	-58.6548		-58.8379	-2.442
34.7	-58.6548	-59.4482	-58.5937		-58.6548	3.357
34.75	-58.5022	-59.906	-58.7769		-58.5022	-1.221
34.8	-58.7769	-59.6619	-58.2581		-58.7769	1.831
34.85	-58.3191	-59.6313	-58.7463		-58.3191	-6.5e-13
34.9	-58.7769	-59.7534	-58.5022		-58.7769	-2.746
34.95	-58.5937	-59.2957	-58.5327		-58.5937	2.747
35	-58.5022	-59.7534	-58.6243		-58.5022	-2.442
35.05	-58.8379	-59.6619	-58.197		-58.8379	2.441
35.1	-58.2581	-59.3872	-58.8379		-58.2581	0.916
35.15	-58.7463	-59.6313	-58.5937		-58.7463	-4.882
35.2	-58.7463	-59.4788	-58.4717		-58.7463	3.967
35.25	-58.3496	-59.5703	-58.6853		-58.3496	0.61
35.3	-58.6853	-59.6008	-58.2275		-58.6853	0.305
35.35	-58.3191	-59.2346	-58.7463		-58.3191	1.526
35.4	-58.5327	-59.6924	-58.5022		-58.5327	-3.357
35.45	-58.6548	-59.5398	-58.2275		-58.6548	3.052
35.5	-58.2275	-59.1736	-58.6243		-58.2275	0
35.55	-58.6548	-59.5703	-58.2886		-58.6548	-2.747
35.6	-58.5022	-59.2651	-58.4412		-58.5022	2.747
35.65	-58.3801	-59.2346	-58.5022		-58.3801	-3.052
35.7	-58.8074	-59.5398	-58.0444		-58.8074	0.305
35.75	-58.3496	-59.082	-58.6243		-58.3496	3.052
35.8	-58.5022	-59.2957	-58.4717		-58.5022	-3.052
35.85	-58.6548	-59.4177	-58.136		-58.6548	2.441
35.9	-58.2581	-59.021	-58.5632		-58.2581	0.611
35.95	-58.5937	-59.3567	-58.3191		-58.5937	-2.746
36	-58.5327	-59.3872	-58.4717		-58.5327	5.188
36.05	-58.0749	-58.96	-58.5022		-58.0749	-0.305
36.1	-58.5632	-59.4482	-58.0444		-58.5632	-3.968
36.15	-58.4717	-59.2651	-58.4412		-58.4717	5.188
36.2	-58.0444	-58.8684	-58.3496		-58.0444	-0.915
36.25	-58.5632	-59.3262	-57.9529		-58.5632	-3.968
36.3	-58.4412	-59.1431	-58.4106		-58.4412	2.746
36.35	-58.2886	-58.8989	-58.2886		-58.2886	-0.61
36.4	-58.5022	-59.3262	-58.0139		-58.5022	-0.915
36.45	-58.3801	-59.021	-58.4106		-58.3801	1.831
36.5	-58.3191	-58.96	-58.136		-58.3191	-2.136
36.55	-58.5937	-59.2651	-58.0749		-58.5937	0.305
36.6	-58.2886	-59.1431	-58.4412		-58.2886	3.051
36.65	-58.2886	-58.9294	-58.1665		-58.2886	-1.526
36.7	-58.4412	-59.3567	-58.0444		-58.4412	-0.305
36.75	-58.3191	-59.1736	-58.2275		-58.3191	0.611
36.8	-58.3801	-58.8989	-57.9834		-58.3801	-2.441
36.85	-58.5632	-59.2957	-57.9834		-58.5632	0.915
36.9	-58.2886	-59.1125	-58.2275		-58.2886	1.22
36.95	-58.4412	-58.8379	-57.8613		-58.4412	-4.577
37	-58.7463	-59.2346	-57.9529		-58.7463	0.916
37.05	-58.3496	-59.082	-58.197		-58.3496	3.967
37.1	-58.3496	-58.6548	-57.9224		-58.3496	-2.136
37.15	-58.5632	-59.2041	-57.9834		-58.5632	0.61
37.2	-58.2886	-59.082	-58.1665		-58.2886	2.441
37.25	-58.3191	-58.6548	-57.9224		-58.3191	-2.441
37.3	-58.5327	-59.0515	-58.0749		-58.5327	0.305
37.35	-58.2886	-59.1125	-58.136		-58.2886	3.357
37.4	-58.197	-58.8074	-57.8613		-58.197	-3.051
37.45	-58.5937	-58.9905	-57.8918		-58.5937	-3.052
37.5	-58.5022	-59.082	-58.1055		-58.5022	3.662
37.55	-58.2275	-58.8074	-57.8918		-58.2275	-1.221
37.6	-58.6243	-58.7158	-57.7393		-58.6243	-4.578
37.65	-58.6853	-59.1736	-58.1055		-58.6853	4.883
37.7	-58.136	-58.8684	-57.9529		-58.136	0.916
37.75	-58.5937	-58.5632	-57.6477		-58.5937	-4.577
37.8	-58.5937	-59.082	-58.0444		-58.5937	3.051
37.85	-58.2886	-58.96	-58.0139		-58.2886	1.22
37.9	-58.4717	-58.6243	-57.6782		-58.4717	-2.441
37.95	-58.5327	-58.8684	-58.136		-58.5327	1.221
38	-58.3496	-59.0515	-58.0444		-58.3496	2.746
38.05	-58.2581	-58.8989	-57.6782		-58.2581	-2.136
38.1	-58.5632	-58.6548	-57.9529		-58.5632	-2.136
38.15	-58.4717	-58.9905	-57.9834		-58.4717	3.967
38.2	-58.1665	-58.9294	-57.7393		-58.1665	-1.22
38.25	-58.5937	-58.5022	-57.7393		-58.5937	-4.578
38.3	-58.6243	-58.8379	-57.9834		-58.6243	2.746
38.35	-58.3191	-58.8989	-57.8918		-58.3191	3.052
38.4	-58.3191	-58.6853	-57.5561		-58.3191	-2.746
38.45	-58.5937	-58.6243	-58.0139		-58.5937	-0.915
38.5	-58.4106	-58.9294	-58.0444		-58.4106	4.577
38.55	-58.136	-58.8379	-57.6477		-58.136	-1.221
38.6	-58.5327	-58.5327	-57.9834		-58.5327	-4.272
38.65	-58.5632	-58.7769	-57.9834		-58.5632	1.526
38.7	-58.3801	-59.082	-57.8003		-58.3801	2.136
38.75	-58.3496	-58.7769	-57.5867		-58.3496	-2.442
38.8	-58.6243	-58.3496	-57.9834		-58.6243	-1.221
38.85	-58.4717	-58.8379	-58.0444		-58.4717	3.662
38.9	-58.2581	-58.8074	-57.6477		-58.2581	-1.526
38.95	-58.6243	-58.6548	-57.8308		-58.6243	-3.662
39	-58.6243	-58.3191	-58.0749		-58.6243	1.831
39.05	-58.4412	-58.7769	-57.9224		-58.4412	4.273
39.1	-58.197	-58.8379	-57.6172		-58.197	-1.22
39.15	-58.5632	-58.5632	-57.9834		-58.5632	-5.188
39.2	-58.7158	-58.4412	-58.0749		-58.7158	1.831
39.25	-58.3801	-58.8074	-57.8918		-58.3801	4.883
39.3	-58.2275	-58.8379	-57.7087		-58.2275	-3.052
39.35	-58.6853	-58.5632	-58.0749		-58.6853	-3.662
39.4	-58.5937	-58.4412	-58.0749		-58.5937	2.747
39.45	-58.4106	-58.7463	-57.7087		-58.4106	2.441
39.5	-58.3496	-58.7463	-57.7393		-58.3496	-3.052
39.55	-58.7158	-58.4717	-58.1055		-58.7158	-3.357
39.6	-58.6853	-58.4106	-57.9529		-58.6853	4.883
39.65	-58.2275	-58.7158	-57.7393		-58.2275	3.052
39.7	-58.3801	-58.7463	-57.9224		-58.3801	-4.273
39.75	-58.6548	-58.5937	-58.1055		-58.6548	-2.136
39.8	-58.5937	-58.3496	-58.0749		-58.5937	3.357
39.85	-58.3191	-58.7158	-57.7087		-58.3191	3.356
39.9	-58.2581	-58.6853	-57.9834		-58.2581	-2.441
39.95	-58.5632	-58.6853	-58.1665		-58.5632	-3.051
40	-58.5632	-58.4106	-58.0139		-58.5632	2.441
40.05	-58.3191	-58.5632	-57.7393		-58.3191	3.967
40.1	-58.1665	-58.7769	-57.7698		-58.1665	-2.441
40.15	-58.5632	-58.6243	-58.1665		-58.5632	-4.578
40.2	-58.6243	-58.3191	-58.0139		-58.6243	1.831
40.25	-58.3801	-58.5022	-57.7393		-58.3801	5.799
40.3	-58.0444	-58.7463	-57.8003		-58.0444	-0.916
40.35	-58.4717	-58.6548	-58.1665		-58.4717	-5.493
40.4	-58.5937	-58.5632	-58.0749		-58.5937	-0.305
40.45	-58.5022	-58.2275	-57.8308		-58.5022	3.967
40.5	-58.197	-58.5937	-57.8003		-58.197	2.747
40.55	-58.2275	-58.7463	-58.136		-58.2275	-2.442
40.6	-58.4412	-58.7463	-58.1055		-58.4412	-2.747
40.65	-58.5022	-58.4717	-58.0139		-58.5022	1.526
40.7	-58.2886	-58.3191	-57.7087		-58.2886	4.883
40.75	-58.0139	-58.6548	-57.9529		-58.0139	-0.915
40.8	-58.3801	-58.6243	-58.2275		-58.3801	-5.798
40.85	-58.5937	-58.5022	-58.1055		-58.5937	-1.221
40.9	-58.5022	-58.4106	-57.8918		-58.5022	4.577
40.95	-58.136	-58.5022	-57.8918		-58.136	3.357
41	-58.1665	-58.6548	-58.197		-58.1665	-3.357
41.05	-58.4717	-58.6853	-58.136		-58.4717	-3.052
41.1	-58.4717	-58.197	-57.9529		-58.4717	0.916
41.15	-58.3801	-58.5022	-57.9529		-58.3801	5.188
41.2	-57.9529	-58.6853	-58.2581		-57.9529	0.305
41.25	-58.3496	-58.3496	-57.9834		-58.3496	-3.662
41.3	-58.3191	-58.5327	-57.8003		-58.3191	2.136
41.35	-58.136	-58.5937	-58.1665		-58.136	0.916
41.4	-58.2275	-58.2275	-57.9224		-58.2275	-2.746
41.45	-58.4106	-58.6548	-57.9224		-58.4106	0.61
41.5	-58.1665	-58.5937	-58.1055		-58.1665	0.305
41.55	-58.3801	-58.3496	-57.5256		-58.3801	-3.052
41.6	-58.4717	-58.5937	-58.2275		-58.4717	3.662
41.65	-58.0139	-58.0444	-57.7698		-58.0139	-0.305
41.7	-58.5022	-58.6853	-58.0749		-58.5022	-1.831
41.75	-58.197	-58.2275	-57.9224		-58.197	0
41.8	-58.5022	-58.7158	-58.0139		-58.5022	-0.611
41.85	-58.2581	-58.3801	-58.0749		-58.2581	2.747
41.9	-58.2275	-58.6548	-57.8613		-58.2275	-1.831
41.95	-58.4412	-58.5632	-58.1055		-58.4412	3.04e-13
42	-58.2275	-58.5632	-57.8308		-58.2275	-0.61
42.05	-58.5022	-58.5632	-58.0749		-58.5022	0.915
42.1	-58.136	-58.4412	-57.7698		-58.136	-0.915
42.15	-58.5937	-58.6243	-58.0749		-58.5937	-0.305
42.2	-58.1665	-58.4412	-57.6477		-58.1665	1.22
42.25	-58.4717	-58.6853	-58.0749		-58.4717	0.61
42.3	-58.1055	-58.2275	-57.6477		-58.1055	-1.22
42.35	-58.5937	-58.6548	-57.9834		-58.5937	6.94e-13
42.4	-58.1055	-58.197	-57.6782		-58.1055	-0.306
42.45	-58.6243	-58.7463	-58.1665		-58.6243	0.611
42.5	-58.0444	-58.2275	-57.6782		-58.0444	0.611
42.55	-58.5632	-58.7463	-58.0749		-58.5632	-2.747
42.6	-58.3191	-58.5022	-57.8308		-58.3191	0.61
42.65	-58.5022	-58.4717	-58.1055		-58.5022	-1.831
42.7	-58.5022	-58.6243	-57.9529		-58.5022	2.747
42.75	-58.2275	-58.197	-57.8918		-58.2275	-1.831
42.8	-58.6853	-58.6243	-58.0749		-58.6853	0.61
42.85	-58.1665	-58.3496	-57.6477		-58.1665	0.305
42.9	-58.6548	-58.5327	-58.2275		-58.6548	-1.831
42.95	-58.3496	-58.5022	-57.8613		-58.3496	0.611
43	-58.5937	-58.197	-58.1665		-58.5937	-2.441
43.05	-58.5937	-58.5937	-58.136		-58.5937	3.662
43.1	-58.2275	-58.2275	-57.8613		-58.2275	-0.306
43.15	-58.6243	-58.5632	-58.2886		-58.6243	-0.916
43.2	-58.3191	-58.5937	-57.7698		-58.3191	1.221
43.25	-58.5022	-58.2886	-58.2275		-58.5022	-2.746
43.3	-58.5937	-58.6853	-58.1665		-58.5937	3.052
43.35	-58.197	-58.3801	-57.8918		-58.197	-0.611
43.4	-58.6548	-58.4717	-58.2275		-58.6548	-2.747
43.45	-58.4717	-58.5937	-57.8308		-58.4717	0.916
43.5	-58.5632	-58.197	-58.1055		-58.5632	-1.526
43.55	-58.6243	-58.5937	-58.1665		-58.6243	3.662
43.6	-58.197	-58.5022	-57.7698		-58.197	-0.915
43.65	-58.7158	-58.2275	-58.2581		-58.7158	-4.883
43.7	-58.6853	-58.6548	-57.9529		-58.6853	3.662
43.75	-58.3496	-58.3191	-58.197		-58.3496	-0.61
43.8	-58.7463	-58.4412	-58.3496		-58.7463	-0.61
43.85	-58.4106	-58.6548	-57.7087		-58.4106	1.22
43.9	-58.6243	-58.3191	-58.2581		-58.6243	-3.357
43.95	-58.7463	-58.5632	-58.1055		-58.7463	3.662
44	-58.2581	-58.5937	-57.9529		-58.2581	0.305
44.05	-58.7158	-58.136	-58.3191		-58.7158	-5.493
44.1	-58.8074	-58.6548	-58.0444		-58.8074	3.052
44.15	-58.4106	-58.5632	-58.0749		-58.4106	-0.305
44.2	-58.8379	-58.197	-58.3191		-58.8379	-2.137
44.25	-58.6243	-58.5937	-57.8918		-58.6243	2.136
44.3	-58.6243	-58.3801	-58.4412		-58.6243	-2.136
44.35	-58.8379	-58.2886	-58.2886		-58.8379	1.221
44.4	-58.5022	-58.5937	-57.9529		-58.5022	1.526
44.45	-58.6853	-58.3191	-58.5022		-58.6853	-3.052
44.5	-58.8074	-58.5327	-58.1665		-58.8074	3.662
44.55	-58.3191	-58.5937	-58.0749		-58.3191	0.611
44.6	-58.7463	-58.2275	-58.5022		-58.7463	-4.578
44.65	-58.7769	-58.4412	-58.197		-58.7769	4.577
44.7	-58.2886	-58.6243	-58.2581		-58.2886	-0.305
44.75	-58.8074	-58.197	-58.3801		-58.8074	-4.577
44.8	-58.7463	-58.5022	-57.8918		-58.7463	5.188
44.85	-58.2886	-58.5632	-58.3496		-58.2886	-0.611
44.9	-58.8074	-58.136	-58.4106		-58.8074	-4.883
44.95	-58.7769	-58.4717	-57.9834		-58.7769	4.273
45	-58.3801	-58.5022	-58.3801		-58.3801	-0.305
45.05	-58.8074	-58.2275	-58.4717		-58.8074	-3.357
45.1	-58.7158	-58.5022	-58.0749		-58.7158	4.578
45.15	-58.3496	-58.6243	-58.4106		-58.3496	-0.305
45.2	-58.7463	-58.3191	-58.3801		-58.7463	-3.967
45.25	-58.7463	-58.4717	-58.0139		-58.7463	3.662
45.3	-58.3801	-58.6548	-58.4717		-58.3801	5.2e-13
45.35	-58.7463	-58.3496	-58.4106		-58.7463	-3.968
45.4	-58.7769	-58.4717	-58.0139		-58.7769	4.577
45.45	-58.2886	-58.6243	-58.4106		-58.2886	0.306
45.5	-58.7463	-58.3496	-58.4106		-58.7463	-4.272
45.55	-58.7158	-58.2581	-58.0139		-58.7158	4.272
45.6	-58.3191	-58.6243	-58.4106		-58.3191	-1.221
45.65	-58.8379	-58.3801	-58.3801		-58.8379	-4.578
45.7	-58.7769	-58.1665	-58.136		-58.7769	5.188
45.75	-58.3191	-58.6243	-58.5022		-58.3191	1.526
45.8	-58.6243	-58.5632	-58.5022		-58.6243	-3.052
45.85	-58.6243	-58.2581	-58.136		-58.6243	2.747
45.9	-58.3496	-58.5937	-58.4106		-58.3496	0.916
45.95	-58.5327	-58.5937	-58.5022		-58.5327	-2.747
46	-58.6243	-58.1665	-58.1055		-58.6243	-0.61
46.05	-58.5937	-58.5327	-58.2886		-58.5937	2.137
46.1	-58.4106	-58.6243	-58.4412		-58.4106	-0.611
46.15	-58.6548	-58.2886	-58.2886		-58.6548	-2.137
46.2	-58.6243	-58.2581	-58.2275		-58.6243	3.662
46.25	-58.2886	-58.6243	-58.4717		-58.2886	-1.22
46.3	-58.7463	-58.4412	-58.3496		-58.7463	-3.051
46.35	-58.5937	-58.1665	-58.197		-58.5937	4.272
46.4	-58.3191	-58.6548	-58.6243		-58.3191	0.61
46.45	-58.5327	-58.6548	-58.5022		-58.5327	-3.662
46.5	-58.6853	-58.3496	-58.136		-58.6853	0.915
46.55	-58.4412	-58.4106	-58.5022		-58.4412	3.662
46.6	-58.3191	-58.6853	-58.4717		-58.3191	-2.136
46.65	-58.6548	-58.5632	-58.197		-58.6548	-3.662
46.7	-58.6853	-58.2886	-58.197		-58.6853	3.967
46.75	-58.2581	-58.7158	-58.4106		-58.2581	0.916
46.8	-58.5937	-58.5937	-58.3191		-58.5937	-4.272
46.85	-58.6853	-58.3496	-58.0444		-58.6853	0.915
46.9	-58.5022	-58.4106	-58.4412		-58.5022	2.747
46.95	-58.4106	-58.6853	-58.3801		-58.4106	-1.526
47	-58.6548	-58.5937	-58.197		-58.6548	-2.442
47.05	-58.6548	-58.2581	-58.4106		-58.6548	2.747
47.1	-58.3801	-58.6548	-58.5327		-58.3801	0.611
47.15	-58.5937	-58.7158	-58.4106		-58.5937	-3.052
47.2	-58.6853	-58.5022	-58.0444		-58.6853	0.305
47.25	-58.5632	-58.3191	-58.5632		-58.5632	3.967
47.3	-58.2886	-58.7463	-58.5937		-58.2886	-0.611
47.35	-58.6243	-58.7769	-58.197		-58.6243	-2.746
47.4	-58.5632	-58.5022	-58.197		-58.5632	1.831
47.45	-58.4412	-58.3496	-58.5632		-58.4412	2.441
47.5	-58.3191	-58.7769	-58.4412		-58.3191	-3.662
47.55	-58.8074	-58.6853	-58.136		-58.8074	-4.272
47.6	-58.7463	-58.3496	-58.3801		-58.7463	4.883
47.65	-58.3191	-58.3496	-58.5937		-58.3191	2.441
47.7	-58.5022	-58.7158	-58.4717		-58.5022	-3.967
47.75	-58.7158	-58.7463	-58.0749		-58.7158	-1.831
47.8	-58.6853	-58.4412	-58.4717		-58.6853	3.357
47.85	-58.3801	-58.4412	-58.5327		-58.3801	2.747
47.9	-58.4106	-58.7769	-58.3191		-58.4106	-3.052
47.95	-58.6853	-58.6853	-58.0444		-58.6853	-2.747
48	-58.6853	-58.5632	-58.4412		-58.6853	3.967
48.05	-58.2886	-58.3801	-58.3801		-58.2886	1.831
48.1	-58.5022	-58.6853	-58.2581		-58.5022	-4.577
48.15	-58.7463	-58.7158	-58.136		-58.7463	-2.136
48.2	-58.7158	-58.4412	-58.4717		-58.7158	2.746
48.25	-58.4717	-58.3191	-58.3496		-58.4717	2.746
48.3	-58.4412	-58.6853	-58.3191		-58.4412	-2.441
48.35	-58.7158	-58.7158	-58.0139		-58.7158	-2.441
48.4	-58.6853	-58.7158	-58.4106		-58.6853	3.357
48.45	-58.3801	-58.2886	-58.4106		-58.3801	3.662
48.5	-58.3191	-58.5632	-58.3496		-58.3191	-2.136
48.55	-58.5937	-58.7769	-58.0749		-58.5937	-2.136
48.6	-58.5327	-58.7463	-58.2886		-58.5327	0.915
48.65	-58.5022	-58.5022	-58.3801		-58.5022	3.357
48.7	-58.197	-58.3801	-58.3801		-58.197	0.61
48.75	-58.4412	-58.6548	-57.9834		-58.4412	-4.578
48.8	-58.6548	-58.6853	-58.2581		-58.6548	-1.831
48.85	-58.6243	-58.5022	-58.3496		-58.6243	2.442
48.9	-58.4106	-58.2581	-58.2275		-58.4106	3.662
48.95	-58.2581	-58.4412	-58.1055		-58.2581	-1.526
49	-58.5632	-58.6853	-58.0749		-58.5632	-3.356
49.05	-58.5937	-58.7463	-58.4412		-58.5937	1.831
49.1	-58.3801	-58.5327	-58.3801		-58.3801	4.577
49.15	-58.136	-58.2581	-58.3801		-58.136	3.47e-13
49.2	-58.3801	-58.6243	-58.1665		-58.3801	-3.662
49.25	-58.5022	-58.8074	-58.3191		-58.5022	-2.136
49.3	-58.5937	-58.7158	-58.5022		-58.5937	2.136
49.35	-58.2886	-58.3496	-58.4106		-58.2886	4.577
49.4	-58.136	-58.4717	-58.0749		-58.136	-2.136
49.45	-58.5022	-58.7463	-58.2581		-58.5022	-4.883
49.5	-58.6243	-58.5937	-58.4717		-58.6243	-0.61
49.55	-58.5632	-58.2886	-58.197		-58.5632	4.883
49.6	-58.136	-58.7463	-58.1665		-58.136	-0.611
49.65	-58.6243	-58.5632	-58.4412		-58.6243	-4.883
49.7	-58.6243	-58.4106	-58.1665		-58.6243	4.578
49.75	-58.1665	-58.7158	-58.2581		-58.1665	-0.305
49.8	-58.6548	-58.3801	-58.5632		-58.6548	-4.578
49.85	-58.6243	-58.6548	-58.136		-58.6243	5.493
49.9	-58.1055	-58.7158	-58.4717		-58.1055	-0.915
49.95	-58.7158	-58.5022	-58.2275		-58.7158	-3.051
50	-58.4106	-58.7463	-58.4717		-58.4106	1.831
50.05	-58.5327	-58.3496	-58.4412		-58.5327	-2.747
50.1	-58.6853	-58.8379	-58.2886		-58.6853	1.831
50.15	-58.3496	-58.2886	-58.4717		-58.3496	-0.61
50.2	-58.7463	-58.8074	-58.136		-58.7463	0.915
50.25	-58.2581	-58.3191	-58.5022		-58.2581	-0.306
50.3	-58.7769	-58.7158	-58.1055		-58.7769	-0.915
50.35	-58.3496	-58.4717	-58.5327		-58.3496	0.611
50.4	-58.7158	-58.7158	-58.0139		-58.7158	0.305
50.45	-58.3191	-58.5632	-58.5632		-58.3191	-0.305
50.5	-58.7463	-58.6853	-58.136		-58.7463	-0.61
50.55	-58.3801	-58.6853	-58.4717		-58.3801	-0.306
50.6	-58.7769	-58.6548	-58.0749		-58.7769	-0.916
50.65	-58.4717	-58.6853	-58.5632		-58.4717	1.221
50.7	-58.6548	-58.4412	-58.0139		-58.6548	-1.526
50.75	-58.6243	-58.6853	-58.5327		-58.6243	0
50.8	-58.6548	-58.2886	-57.9529		-58.6548	-1.22
50.85	-58.7463	-58.7769	-58.4717		-58.7463	1.221
50.9	-58.5327	-58.2581	-58.197		-58.5327	3.03e-13
50.95	-58.7463	-58.7769	-58.3191		-58.7463	1.526
51	-58.3801	-58.5937	-58.3496		-58.3801	-0.306
51.05	-58.7769	-58.5327	-58.1055		-58.7769	0.915
51.1	-58.2886	-58.6548	-58.5022		-58.2886	-0.305
51.15	-58.8074	-58.2886	-58.1055		-58.8074	-1.831
51.2	-58.4717	-58.8379	-58.4412		-58.4717	1.831
51.25	-58.6243	-58.5327	-58.1665		-58.6243	-2.746
51.3	-58.7463	-58.6853	-58.4106		-58.7463	2.747
51.35	-58.3496	-58.6243	-58.4412		-58.3496	-0.611
51.4	-58.8074	-58.2886	-58.0444		-58.8074	-2.441
51.45	-58.5937	-58.7158	-58.4412		-58.5937	-3.04e-13
51.5	-58.8074	-58.4412	-58.0444		-58.8074	-0.916
51.55	-58.6853	-58.5327	-58.4106		-58.6853	2.442
51.6	-58.5632	-58.5937	-58.2886		-58.5632	-0.916
51.65	-58.7769	-58.2275	-58.0749		-58.7769	2.746
51.7	-58.2886	-58.6853	-58.3496		-58.2886	-1.22
51.75	-58.8989	-58.4412	-58.0139		-58.8989	-2.136
51.8	-58.5022	-58.4412	-58.4412		-58.5022	3.662
51.85	-58.5327	-58.6548	-58.2886		-58.5327	-3.052
51.9	-58.8074	-58.2886	-58.0139		-58.8074	1.831
51.95	-58.3496	-58.5327	-58.3496		-58.3496	0.305
52	-58.7769	-58.5022	-58.136		-58.7769	-0.61
52.05	-58.4106	-58.1055	-58.2886		-58.4106	-0.61
52.1	-58.8379	-58.5937	-58.3496		-58.8379	-3.968
52.15	-58.8074	-58.4106	-57.8308		-58.8074	3.662
52.2	-58.4717	-58.1665	-58.4106		-58.4717	-0.305
52.25	-58.8379	-58.4412	-58.1665		-58.8379	0
52.3	-58.4717	-58.1665	-58.1055		-58.4717	0.305
52.35	-58.8074	-58.4412	-58.3496		-58.8074	-3.052
52.4	-58.7769	-58.4412	-58.0444		-58.7769	3.052
52.45	-58.5022	-58.136	-58.3801		-58.5022	-0.61
52.5	-58.8379	-58.5327	-58.3496		-58.8379	0
52.55	-58.5022	-58.5632	-57.8918		-58.5022	0.916
52.6	-58.7463	-57.9834	-58.4717		-58.7463	-3.662
52.65	-58.8684	-58.5327	-58.3191		-58.8684	4.272
52.7	-58.3191	-58.3801	-58.0749		-58.3191	-0.61
52.75	-58.9294	-58.136	-58.3801		-58.9294	-3.967
52.8	-58.7158	-58.5632	-58.0444		-58.7158	2.441
52.85	-58.6853	-58.3496	-58.136		-58.6853	-2.136
52.9	-58.9294	-58.2275	-58.3191		-58.9294	2.136
52.95	-58.4717	-58.5937	-57.9529		-58.4717	0.61
53	-58.8684	-58.3191	-58.2581		-58.8684	-3.662
53.05	-58.8379	-58.2581	-58.3496		-58.8379	5.493
53.1	-58.3191	-58.5937	-57.9529		-58.3191	-0.61
53.15	-58.8989	-58.3191	-58.2886		-58.8989	-3.967
53.2	-58.7158	-58.4412	-58.2886		-58.7158	3.662
53.25	-58.5327	-58.5632	-57.8918		-58.5327	-1.526
53.3	-58.8684	-58.2275	-58.2886		-58.8684	-0.61
53.35	-58.5937	-58.3801	-58.2886		-58.5937	0.61
53.4	-58.8074	-58.4412	-57.8613		-58.8074	-4.578
53.45	-59.0515	-58.1665	-58.2275		-59.0515	3.052
53.5	-58.5022	-58.2275	-58.2275		-58.5022	1.526
53.55	-58.8989	-58.4106	-57.8308		-58.8989	-3.967
53.6	-58.8989	-58.2581	-58.2581		-58.8989	3.967
53.65	-58.5022	-58.197	-58.0749		-58.5022	0.305
53.7	-58.8684	-58.4717	-57.9529		-58.8684	-3.052
53.75	-58.8074	-58.197	-58.4412		-58.8074	4.578
53.8	-58.4106	-58.197	-58.1055		-58.4106	-1.831
53.85	-58.9905	-58.4412	-57.8613		-58.9905	-3.663
53.9	-58.7769	-58.197	-58.3496		-58.7769	5.493
53.95	-58.4412	-58.0444	-58.0749		-58.4412	-2.136
54	-58.9905	-58.4717	-57.9224		-58.9905	-3.967
54.05	-58.8379	-58.3191	-58.2275		-58.8379	3.662
54.1	-58.6243	-57.8918	-58.0749		-58.6243	-0.305
54.15	-58.8684	-58.3801	-57.8003		-58.8684	-1.526
54.2	-58.7769	-58.136	-58.2275		-58.7769	3.052
54.25	-58.5632	-57.9529	-58.1665		-58.5632	-2.136
54.3	-58.9905	-58.2581	-57.7698		-58.9905	-2.137
54.35	-58.7769	-58.3191	-58.3191		-58.7769	4.578
54.4	-58.5327	-58.1665	-58.2275		-58.5327	-0.305
54.45	-58.8074	-58.136	-57.7393		-58.8074	-2.442
54.5	-58.7769	-58.4717	-58.1665		-58.7769	3.662
54.55	-58.4412	-58.2581	-58.2886		-58.4412	-1.831
54.6	-58.96	-57.9224	-57.8613		-58.96	-4.577
54.65	-58.8989	-58.4412	-58.0444		-58.8989	4.883
54.7	-58.4717	-58.4106	-58.2275		-58.4717	-0.916
54.75	-58.9905	-58.0444	-57.9224		-58.9905	-3.967
54.8	-58.8684	-58.3191	-57.8003		-58.8684	4.578
54.85	-58.5327	-58.3496	-58.136		-58.5327	-0.305
54.9	-58.8989	-58.2886	-58.1055		-58.8989	-3.662
54.95	-58.8989	-58.136	-57.7087		-58.8989	2.441
55	-58.6548	-58.4717	-58.2275		-58.6548	2.441
55.05	-58.6548	-58.4412	-58.2581		-58.6548	-2.746
55.1	-58.9294	-58.136	-57.8613		-58.9294	-0.61
55.15	-58.7158	-58.5327	-57.9834		-58.7158	3.662
55.2	-58.5632	-58.5937	-58.2275		-58.5632	-1.526
55.25	-58.8684	-58.4106	-58.0139		-58.8684	-2.747
55.3	-58.8379	-58.197	-57.7698		-58.8379	3.662
55.35	-58.5022	-58.6243	-58.136		-58.5022	-0.305
55.4	-58.8684	-58.6853	-58.136		-58.8684	-3.662
55.45	-58.8684	-58.3191	-57.7393		-58.8684	3.052
55.5	-58.5632	-58.2886	-58.0444		-58.5632	1.526
55.55	-58.7158	-58.6853	-58.2275		-58.7158	-3.968
55.6	-58.96	-58.5937	-58.0444		-58.96	3.47e-13
55.65	-58.7158	-58.2275	-57.8003		-58.7158	6.104
55.7	-58.3496	-58.5022	-58.2581		-58.3496	-0.916
55.75	-58.8074	-58.8684	-58.1665		-58.8074	-4.273
55.8	-58.7769	-58.5937	-57.8918		-58.7769	3.052
55.85	-58.5022	-58.2275	-57.8918		-58.5022	1.832
55.9	-58.5937	-58.5632	-58.2275		-58.5937	-3.052
55.95	-58.8074	-58.6548	-58.1665		-58.8074	-2.137
56	-58.8074	-58.5937	-57.7698		-58.8074	3.357
56.05	-58.4717	-58.2581	-57.8613		-58.4717	0.611
56.1	-58.7463	-58.5327	-58.1665		-58.7463	-3.052
56.15	-58.7769	-58.5937	-58.0139		-58.7769	1.22
56.2	-58.6243	-58.5632	-57.6782		-58.6243	2.137
56.25	-58.5632	-58.2275	-57.9529		-58.5632	-2.746
56.3	-58.8989	-58.7158	-58.1665		-58.8989	-2.747
56.35	-58.8379	-58.6853	-58.0139		-58.8379	3.967
56.4	-58.5022	-58.6853	-57.6477		-58.5022	1.831
56.45	-58.6548	-58.4106	-58.136		-58.6548	-3.357
56.5	-58.8379	-58.6243	-58.136		-58.8379	-0.61
56.55	-58.7158	-58.7158	-57.9529		-58.7158	3.967
56.6	-58.4412	-58.6548	-57.6782		-58.4412	-1.221
56.65	-58.8379	-58.3496	-58.0139		-58.8379	-4.272
56.7	-58.8684	-58.5022	-58.0139		-58.8684	1.526
56.75	-58.6853	-58.7769	-57.9529		-58.6853	3.357
56.8	-58.5327	-58.5937	-57.6477		-58.5327	-1.526
56.85	-58.8379	-58.5632	-57.9529		-58.8379	-3.662
56.9	-58.8989	-58.3191	-58.1055		-58.8989	1.221
56.95	-58.7158	-58.7463	-58.1665		-58.7158	4.272
57	-58.4717	-58.7463	-57.8613		-58.4717	-0.305
57.05	-58.7463	-58.8074	-57.9224		-58.7463	-3.357
57.1	-58.8074	-58.4106	-58.197		-58.8074	8.68e-14
57.15	-58.7463	-58.6548	-58.197		-58.7463	4.273
57.2	-58.3801	-58.8074	-57.9834		-58.3801	0.305
57.25	-58.7158	-58.8379	-57.8613		-58.7158	-5.799
57.3	-58.96	-58.5632	-58.136		-58.96	-0.305
57.35	-58.7463	-58.4412	-58.197		-58.7463	5.494
57.4	-58.4106	-58.6548	-57.9834		-58.4106	0.915
57.45	-58.6548	-58.7463	-57.8003		-58.6548	-5.188
57.5	-58.9294	-58.7463	-58.1055		-58.9294	-1.526
57.55	-58.8074	-58.4412	-58.2275		-58.8074	3.967
57.6	-58.5327	-58.5632	-58.2275		-58.5327	3.662
57.65	-58.4412	-58.8074	-57.8308		-58.4412	-1.831
57.7	-58.7158	-58.8074	-57.9529		-58.7158	-2.441
57.75	-58.6853	-58.5937	-58.2886		-58.6853	2.441
57.8	-58.4717	-58.6243	-58.197		-58.4717	2.747
57.85	-58.4106	-58.8989	-57.8003		-58.4106	-1.831
57.9	-58.6548	-58.7158	-58.1665		-58.6548	-3.357
57.95	-58.7463	-58.4717	-58.1665		-58.7463	3.662
58	-58.2886	-58.8684	-57.7393		-58.2886	-0.306
58.05	-58.7769	-58.5022	-58.136		-58.7769	-3.967
58.1	-58.6853	-58.5937	-58.136		-58.6853	3.968
58.15	-58.3801	-58.8074	-57.7698		-58.3801	-1.831
58.2	-58.8684	-58.3191	-58.136		-58.8684	-0.916
58.25	-58.4717	-58.8989	-57.8918		-58.4717	2.136
58.3	-58.6548	-58.5327	-58.2275		-58.6548	-2.441
58.35	-58.7158	-58.8989	-57.9834		-58.7158	2.747
58.4	-58.3801	-58.7158	-57.9834		-58.3801	-0.916
58.45	-58.8074	-58.6853	-58.197		-58.8074	0.915
58.5	-58.2886	-58.8379	-57.8918		-58.2886	0.916
58.55	-58.7158	-58.6243	-58.1665		-58.7158	-0.61
58.6	-58.3496	-58.9294	-57.8918		-58.3496	-0.305
58.65	-58.7463	-58.5022	-58.0749		-58.7463	1.221
58.7	-58.2275	-58.8684	-57.7393		-58.2275	-0.611
58.75	-58.8074	-58.3496	-58.136		-58.8074	-0.611
58.8	-58.2886	-58.8379	-57.7698		-58.2886	-0.305
58.85	-58.8379	-58.3191	-58.1055		-58.8379	2.137
58.9	-58.0749	-58.7769	-57.8003		-58.0749	0.916
58.95	-58.7463	-58.2581	-58.197		-58.7463	-2.137
59	-58.2886	-58.8684	-57.6782		-58.2886	1.22
59.05	-58.6243	-58.5327	-58.1665		-58.6243	0.305
59.1	-58.2581	-58.7769	-57.7393		-58.2581	-0.61
59.15	-58.6853	-58.5632	-58.2581		-58.6853	-0.305
59.2	-58.2886	-58.6853	-57.8613		-58.2886	-1.221
59.25	-58.8074	-58.7769	-58.1055		-58.8074	-2.136
59.3	-58.5022	-58.4106	-57.9834		-58.5022	1.831
59.35	-58.6243	-58.7463	-57.9529		-58.6243	-1.831
59.4	-58.6853	-58.2275	-58.0749		-58.6853	0.916
59.45	-58.5327	-58.7769	-57.7698		-58.5327	-1.221
59.5	-58.8074	-58.6243	-58.0749		-58.8074	2.136
59.55	-58.3191	-58.5937	-57.7698		-58.3191	0.611
59.6	-58.7463	-58.6853	-58.2275		-58.7463	0.305
59.65	-58.2886	-58.3496	-57.9834		-58.2886	6.5e-13
59.7	-58.7463	-58.8989	-57.9529		-58.7463	-2.136
59.75	-58.5022	-58.5937	-58.2275		-58.5022	2.441
59.8	-58.5022	-58.6243	-57.7698		-58.5022	-1.221
59.85	-58.6243	-58.7769	-58.197		-58.6243	1.831
59.9	-58.3191	-58.4106	-57.9529		-58.3191	-0.915
59.95	-58.7158	-58.8684	-57.9224		-58.7158	-1.526
60	-58.4717	-58.6243	-58.1665		-58.4717	0.915
60.05	-58.6243	-58.4717	-57.7087		-58.6243	-2.746
60.1	-58.7463	-58.8074	-58.2581		-58.7463	1.526
60.15	-58.4717	-58.4412	-57.9529		-58.4717	0.305
60.2	-58.7158	-58.7463	-58.0749		-58.7158	1.221
60.25	-58.3496	-58.7769	-58.2275		-58.3496	0
60.3	-58.7158	-58.5022	-57.6782		-58.7158	-3.357
60.35	-58.6853	-58.9294	-58.3191		-58.6853	3.662
60.4	-58.3496	-58.7158	-58.1665		-58.3496	-0.61
60.45	-58.7463	-58.6548	-58.0444		-58.7463	-0.305
60.5	-58.3801	-58.8989	-58.3191		-58.3801	0.915
60.55	-58.6548	-58.6243	-57.9529		-58.6548	-2.442
60.6	-58.6243	-58.8074	-58.1665		-58.6243	3.967
60.65	-58.2581	-58.8684	-58.2275		-58.2581	-1.22
60.7	-58.7463	-58.5022	-57.8003		-58.7463	-2.136
60.75	-58.4717	-58.8989	-58.3191		-58.4717	1.831
60.8	-58.5632	-58.8684	-58.1055		-58.5632	-1.831
60.85	-58.6548	-58.4412	-58.1055		-58.6548	2.136
60.9	-58.3496	-58.8989	-58.3496		-58.3496	-0.61
60.95	-58.7158	-58.8379	-58.0749		-58.7158	-3.662
61	-58.7158	-58.6243	-58.2275		-58.7158	3.967
61.05	-58.3191	-58.96	-58.4106		-58.3191	5.64e-13
61.1	-58.7158	-58.7158	-58.0139		-58.7158	-1.221
61.15	-58.4412	-58.7463	-58.3801		-58.4412	1.221
61.2	-58.5937	-59.0515	-58.3191		-58.5937	-2.441
61.25	-58.6853	-58.6853	-57.8918		-58.6853	2.746
61.3	-58.3191	-58.7463	-58.3801		-58.3191	5.2e-13
61.35	-58.6853	-58.96	-58.2886		-58.6853	-4.272
61.4	-58.7463	-58.6548	-58.0444		-58.7463	3.662
61.45	-58.3191	-58.8989	-58.3801		-58.3191	0.305
61.5	-58.7158	-58.9905	-58.197		-58.7158	-3.052
61.55	-58.6243	-58.6243	-58.136		-58.6243	3.357
61.6	-58.3801	-58.96	-58.4106		-58.3801	-1.831
61.65	-58.8074	-58.9905	-58.197		-58.8074	-0.611
61.7	-58.4412	-58.6548	-58.2581		-58.4412	3.662
61.75	-58.4412	-58.96	-58.4106		-58.4412	-2.136
61.8	-58.6548	-59.1431	-58.0749		-58.6548	0.916
61.85	-58.3496	-58.7463	-58.2275		-58.3496	1.221
61.9	-58.5327	-58.96	-58.4412		-58.5327	-3.662
61.95	-58.7158	-59.021	-58.0444		-58.7158	3.052
62	-58.2275	-58.8379	-58.3801		-58.2275	0.61
62.05	-58.6548	-58.9905	-58.3496		-58.6548	-4.273
62.1	-58.6548	-59.082	-57.9834		-58.6548	4.883
62.15	-58.1665	-58.8074	-58.3191		-58.1665	0.305
62.2	-58.6243	-58.8074	-58.4717		-58.6243	-5.188
62.25	-58.6853	-59.0515	-58.1665		-58.6853	3.357
62.3	-58.2886	-58.8684	-58.3191		-58.2886	0.305
62.35	-58.6548	-58.7769	-58.5327		-58.6548	-3.357
62.4	-58.6243	-59.082	-58.2886		-58.6243	4.883
62.45	-58.1665	-59.1125	-58.2581		-58.1665	-6.5e-13
62.5	-58.6243	-58.7158	-58.5022		-58.6243	-4.272
62.55	-58.5937	-59.082	-58.2581		-58.5937	3.662
62.6	-58.2581	-59.1125	-58.197		-58.2581	-0.306
62.65	-58.6243	-58.6853	-58.5327		-58.6243	-4.577
62.7	-58.7158	-59.1125	-58.3191		-58.7158	3.968
62.75	-58.2275	-59.0515	-58.0444		-58.2275	1.526
62.8	-58.5632	-58.7769	-58.5937		-58.5632	-3.662
62.85	-58.5937	-58.8379	-58.3496		-58.5937	2.441
62.9	-58.3191	-59.0515	-58.1055		-58.3191	0.305
62.95	-58.5632	-58.8684	-58.4717		-58.5632	-3.052
63	-58.6243	-58.6548	-58.5327		-58.6243	2.746
63.05	-58.2886	-59.021	-58.2275		-58.2886	2.442
63.1	-58.3801	-59.082	-58.4412		-58.3801	-2.746
63.15	-58.5632	-58.7158	-58.5022		-58.5632	-2.6e-13
63.2	-58.3801	-58.9294	-58.197		-58.3801	2.746
63.25	-58.2886	-59.2041	-58.2581		-58.2886	-1.831
63.3	-58.5632	-58.96	-58.5632		-58.5632	-3.051
63.35	-58.5937	-58.8379	-58.3801		-58.5937	3.357
63.4	-58.2275	-59.2346	-57.9834		-58.2275	-0.306
63.45	-58.6243	-59.1431	-58.4412		-58.6243	-4.273
63.5	-58.6548	-58.7463	-58.4717		-58.6548	3.662
63.55	-58.2581	-59.021	-58.1055		-58.2581	1.221
63.6	-58.5327	-59.1736	-58.3801		-58.5327	-3.662
63.65	-58.6243	-58.9905	-58.5327		-58.6243	2.746
63.7	-58.2581	-58.6853	-58.3801		-58.2581	3.052
63.75	-58.3191	-59.1736	-58.0444		-58.3191	-3.662
63.8	-58.6243	-59.1736	-58.5937		-58.6243	-1.221
63.85	-58.4412	-58.8684	-58.4717		-58.4412	5.188
63.9	-58.1055	-58.8684	-58.0444		-58.1055	-1.525
63.95	-58.5937	-59.2651	-58.2886		-58.5937	-5.493
64	-58.6548	-59.082	-58.4106		-58.6548	3.356
64.05	-58.2581	-58.8379	-58.197		-58.2581	3.052
64.1	-58.3496	-58.8684	-57.9529		-58.3496	-3.662
64.15	-58.6243	-59.1125	-58.3191		-58.6243	-1.526
64.2	-58.5022	-59.0515	-58.3801		-58.5022	4.273
64.25	-58.197	-58.7158	-58.197		-58.197	-0.61
64.3	-58.5632	-58.8989	-58.1055		-58.5632	-2.747
64.35	-58.4717	-59.1736	-58.5022		-58.4717	3.051
64.4	-58.2581	-59.1125	-58.3496		-58.2581	2.136
64.45	-58.2581	-58.7769	-58.0749		-58.2581	-3.356
64.5	-58.5937	-58.96	-58.2275		-58.5937	-2.136
64.55	-58.4717	-59.1736	-58.4412		-58.4717	4.272
64.6	-58.1665	-59.1431	-58.3801		-58.1665	0.611
64.65	-58.4106	-58.7463	-58.0139		-58.4106	-4.578
64.7	-58.6243	-58.9294	-58.1665		-58.6243	-0.306
64.75	-58.4412	-59.1125	-58.4717		-58.4412	5.494
64.8	-58.0749	-59.0515	-58.3801		-58.0749	0
64.85	-58.4412	-58.7769	-58.0444		-58.4412	-4.578
64.9	-58.5327	-58.7769	-58.2275		-58.5327	1.221
64.95	-58.3191	-59.1125	-58.5327		-58.3191	5.188
65	-58.0139	-59.0515	-58.4412		-58.0139	-0.61
65.05	-58.3801	-58.96	-58.0139		-58.3801	-4.578
65.1	-58.4717	-58.8379	-58.1055		-58.4717	1.22
65.15	-58.2581	-59.0515	-58.4106		-58.2581	4.883
65.2	-57.9834	-59.0515	-58.2886		-57.9834	-1.831
65.25	-58.4412	-58.9905	-58.0749		-58.4412	-5.188
65.3	-58.5022	-58.6243	-58.0139		-58.5022	0.916
65.35	-58.3496	-58.8684	-58.3191		-58.3496	5.188
65.4	-57.9834	-59.082	-58.3496		-57.9834	-0.916
65.45	-58.4412	-59.021	-57.9834		-58.4412	-5.188
65.5	-58.5022	-58.8684	-57.9529		-58.5022	0.306
65.55	-58.4106	-58.6548	-58.3191		-58.4106	3.967
65.6	-58.1055	-59.082	-58.3801		-58.1055	0.305
65.65	-58.3801	-59.082	-58.3191		-58.3801	-4.272
65.7	-58.5327	-59.082	-57.8308		-58.5327	-0.305
65.75	-58.4106	-58.8379	-58.1665		-58.4106	3.967
65.8	-58.136	-58.7769	-58.4106		-58.136	2.136
65.85	-58.197	-59.1125	-58.3191		-58.197	-4.272
65.9	-58.5632	-59.082	-58.1055		-58.5632	-3.357
65.95	-58.5327	-58.8684	-57.9529		-58.5327	1.831
66	-58.3801	-58.7158	-58.2275		-58.3801	3.052
66.05	-58.2275	-59.1125	-58.2581		-58.2275	-1.221
66.1	-58.5022	-59.021	-58.0139		-58.5022	-3.662
66.15	-58.5937	-58.8379	-57.9224		-58.5937	1.221
66.2	-58.3801	-58.8684	-58.3191		-58.3801	2.441
66.25	-58.3496	-59.1125	-58.197		-58.3496	-1.221
66.3	-58.5022	-58.8379	-57.8918		-58.5022	0.305
66.35	-58.3191	-58.96	-58.2275		-58.3191	2.747
66.4	-58.2275	-59.1736	-58.136		-58.2275	-2.746
66.45	-58.5937	-58.5937	-57.9834		-58.5937	-0.306
66.5	-58.2581	-59.2041	-58.2581		-58.2581	2.136
66.55	-58.3801	-58.96	-57.8003		-58.3801	-3.051
66.6	-58.5632	-58.9294	-58.2275		-58.5632	2.136
66.65	-58.1665	-59.1431	-57.8918		-58.1665	0.305
66.7	-58.5327	-58.7463	-58.197		-58.5327	0.916
66.75	-58.0749	-59.082	-58.1055		-58.0749	-1.221
66.8	-58.6548	-58.5937	-58.0444		-58.6548	-1.832
66.85	-58.2581	-59.082	-58.1665		-58.2581	0.916
66.9	-58.5632	-58.6243	-58.0444		-58.5632	0.611
66.95	-58.197	-59.082	-58.3496		-58.197	0.61
67	-58.5022	-58.7463	-57.8613		-58.5022	0.305
67.05	-58.1665	-59.2041	-58.2581		-58.1665	-0.61
67.1	-58.5632	-58.7158	-57.8613		-58.5632	-0.916
67.15	-58.2581	-59.1736	-58.2886		-58.2581	0.915
67.2	-58.4717	-58.8989	-57.8918		-58.4717	-0.915
67.25	-58.3496	-59.082	-58.1665		-58.3496	0
67.3	-58.4717	-58.9294	-57.6782		-58.4717	0.305
67.35	-58.3191	-58.96	-58.1665		-58.3191	-0.305
67.4	-58.5022	-58.9905	-57.6477		-58.5022	5.2e-13
67.45	-58.3191	-58.8074	-58.197		-58.3191	0.305
67.5	-58.4717	-59.082	-57.7698		-58.4717	0
67.55	-58.3191	-58.6243	-58.3191		-58.3191	1.831
67.6	-58.2886	-59.1125	-57.9834		-58.2886	-0.915
67.65	-58.4106	-58.8074	-58.1055		-58.4106	2.137
67.7	-58.0749	-59.2041	-58.1055		-58.0749	-0.306
67.75	-58.4412	-58.8989	-57.9224		-58.4412	1.22
67.8	-57.9529	-58.8989	-58.197		-57.9529	0.306
67.85	-58.4106	-59.2041	-57.8003		-58.4106	-1.22
67.9	-58.0749	-58.6243	-58.197		-58.0749	-0.306
67.95	-58.4412	-59.2041	-57.8308		-58.4412	-1.526
68	-58.2275	-58.7769	-58.136		-58.2275	0.611
68.05	-58.3801	-58.8989	-58.136		-58.3801	-2.442
68.1	-58.4717	-59.021	-57.8613		-58.4717	1.831
68.15	-58.197	-58.5937	-58.197		-58.197	-0.915
68.2	-58.5632	-59.1431	-57.9224		-58.5632	2.136
68.25	-57.9834	-58.8379	-58.2886		-57.9834	0.915
68.3	-58.4717	-58.8684	-58.0444		-58.4717	-3.357
68.35	-58.3191	-59.1125	-57.9224		-58.3191	3.052
68.4	-58.1665	-58.6548	-58.2275		-58.1665	-0.915
68.45	-58.4106	-59.0515	-57.8613		-58.4106	3.052
68.5	-57.8613	-58.9905	-58.1665		-57.8613	-0.916
68.55	-58.5022	-58.6853	-58.1665		-58.5022	-3.662
68.6	-58.2275	-59.0515	-57.7698		-58.2275	3.357
68.65	-58.1665	-58.7463	-58.2275		-58.1665	-1.221
68.7	-58.3496	-58.7769	-57.9224		-58.3496	2.136
68.75	-57.9529	-58.9905	-58.0749		-57.9529	-1.831
68.8	-58.5327	-58.5632	-58.136		-58.5327	-3.052
68.85	-58.2581	-58.8684	-57.7698		-58.2581	3.967
68.9	-58.136	-58.8379	-58.3191		-58.136	-1.831
68.95	-58.4412	-58.5632	-58.0444		-58.4412	1.831
69	-57.9529	-59.082	-57.8613		-57.9529	0.611
69.05	-58.3801	-58.8379	-58.2581		-58.3801	-3.052
69.1	-58.2581	-58.6853	-57.8613		-58.2581	4.577
69.15	-57.9224	-58.96	-58.136		-57.9224	-1.831
69.2	-58.4412	-58.7463	-58.136		-58.4412	-2.441
69.25	-58.1665	-58.8379	-57.6782		-58.1665	2.137
69.3	-58.2275	-58.9294	-58.136		-58.2275	-2.136
69.35	-58.3801	-58.6548	-58.0139		-58.3801	2.746
69.4	-57.9529	-58.9294	-57.8003		-57.9529	-1.831
69.45	-58.5632	-58.9905	-58.136		-58.5632	-3.662
69.5	-58.3191	-58.5327	-57.9529		-58.3191	6.103
69.55	-57.9529	-58.8684	-57.9224		-57.9529	-1.526
69.6	-58.4717	-59.0515	-58.1665		-58.4717	-2.136
69.65	-58.1665	-58.5022	-57.7698		-58.1665	2.136
69.7	-58.2581	-59.0515	-58.0444		-58.2581	-1.831
69.75	-58.3496	-58.9294	-58.1665		-58.3496	3.052
69.8	-57.9529	-58.5937	-57.6477		-57.9529	-0.61
69.85	-58.4106	-59.082	-58.0749		-58.4106	-4.272
69.9	-58.3801	-58.9294	-57.9529		-58.3801	4.272
69.95	-57.9834	-58.4717	-57.5256		-57.9834	-0.305
70	-58.4106	-58.9905	-58.136		-58.4106	-4.272
70.05	-58.4106	-58.8074	-57.9529		-58.4106	3.051
70.1	-58.1055	-58.5632	-57.5867		-58.1055	-1.221
70.15	-58.5327	-59.021	-58.1055		-58.5327	-0.915
70.2	-58.197	-58.8379	-57.9224		-58.197	3.357
70.25	-58.197	-58.6548	-57.5561		-58.197	-2.442
70.3	-58.4412	-58.9294	-58.0139		-58.4412	0.61
70.35	-58.136	-58.8989	-57.8613		-58.136	1.831
70.4	-58.2581	-58.4412	-57.5561		-58.2581	-2.136
70.45	-58.3496	-59.0515	-58.0444		-58.3496	1.526
70.5	-58.1055	-58.9294	-57.7087		-58.1055	1.221
70.55	-58.2275	-58.4412	-57.4951		-58.2275	-2.441
70.6	-58.3496	-58.8989	-57.9224		-58.3496	1.22
70.65	-58.1055	-58.8379	-57.8003		-58.1055	-0.61
70.7	-58.4106	-58.5632	-57.5561		-58.4106	-4.577
70.75	-58.5632	-58.8379	-58.0139		-58.5632	3.967
70.8	-58.0139	-58.8379	-58.0139		-58.0139	2.441
70.85	-58.3191	-58.5327	-57.5867		-58.3191	-4.273
70.9	-58.4412	-58.7463	-58.0444		-58.4412	2.747
70.95	-58.0444	-58.9294	-57.9529		-58.0444	0.611
71	-58.3801	-58.7463	-57.6172		-58.3801	-3.968
71.05	-58.4412	-58.5632	-57.9834		-58.4412	3.662
71.1	-58.0139	-58.96	-57.9529		-58.0139	0.916
71.15	-58.3496	-58.9294	-57.4951		-58.3496	-3.967
71.2	-58.4106	-58.4106	-57.7698		-58.4106	1.831
71.25	-58.1665	-58.7463	-57.8918		-58.1665	1.525
71.3	-58.2581	-58.8074	-57.6172		-58.2581	-3.357
71.35	-58.5022	-58.5632	-57.6477		-58.5022	-0.61
71.4	-58.3191	-58.6243	-57.8308		-58.3191	3.052
71.45	-58.197	-58.8989	-57.8003		-58.197	-1.526
71.5	-58.4717	-58.6548	-57.6172		-58.4717	-1.526
71.55	-58.3496	-58.5022	-57.9224		-58.3496	3.052
71.6	-58.1665	-58.96	-57.8003		-58.1665	-2.441
71.65	-58.5937	-58.8684	-57.4341		-58.5937	-2.441
71.7	-58.4106	-58.5022	-57.8613		-58.4106	6.408
71.75	-57.9529	-58.6548	-57.8613		-57.9529	-1.221
71.8	-58.5327	-58.9905	-57.5561		-58.5327	-4.883
71.85	-58.4412	-58.6853	-57.6172		-58.4412	3.967
71.9	-58.136	-58.3496	-57.9224		-58.136	-8.68e-13
71.95	-58.4412	-58.7769	-57.7393		-58.4412	-4.272
72	-58.5632	-58.7158	-57.4036		-58.5632	0
72.05	-58.4412	-58.5022	-57.8613		-58.4412	4.272
72.1	-58.136	-58.4717	-57.8918		-58.136	-1.525
72.15	-58.5937	-58.7769	-57.5561		-58.5937	-3.052
72.2	-58.4412	-58.7463	-57.6172		-58.4412	5.493
72.25	-58.0444	-58.4106	-57.9834		-58.0444	-0.305
72.3	-58.4717	-58.6548	-57.8003		-58.4717	-3.968
72.35	-58.4412	-58.8379	-57.4341		-58.4412	3.052
72.4	-58.1665	-58.7769	-57.8613		-58.1665	2.747
72.45	-58.1665	-58.4412	-57.7087		-58.1665	-3.357
72.5	-58.5022	-58.7463	-57.5256		-58.5022	-2.136
72.55	-58.3801	-58.7463	-57.4951		-58.3801	4.578
72.6	-58.0444	-58.5937	-57.8308		-58.0444	-1.221
72.65	-58.5022	-58.2886	-57.8308		-58.5022	-5.188
72.7	-58.5632	-58.7769	-57.4341		-58.5632	2.441
72.75	-58.2581	-58.7158	-57.6172		-58.2581	4.272
72.8	-58.136	-58.5632	-57.8613		-58.136	-3.051
72.85	-58.5632	-58.3801	-57.7087		-58.5632	-4.577
72.9	-58.5937	-58.8074	-57.4036		-58.5937	3.967
72.95	-58.1665	-58.8379	-57.7393		-58.1665	3.356
73	-58.2581	-58.5632	-57.8003		-58.2581	-3.052
73.05	-58.4717	-58.4717	-57.6782		-58.4717	-1.22
73.1	-58.3801	-58.8989	-57.251		-58.3801	4.273
73.15	-58.0444	-58.8379	-57.6782		-58.0444	0.305
73.2	-58.3496	-58.7463	-57.6782		-58.3496	-3.662
73.25	-58.4106	-58.4412	-57.6172		-58.4106	-0.305
73.3	-58.3801	-58.7769	-57.2815		-58.3801	3.967
73.35	-58.0139	-58.9294	-57.6172		-58.0139	0.305
73.4	-58.3496	-58.8074	-57.8308		-58.3496	-4.883
73.45	-58.5022	-58.4412	-57.6782		-58.5022	0.61
73.5	-58.2886	-58.7158	-57.3425		-58.2886	3.967
73.55	-58.1055	-58.8989	-57.6477		-58.1055	-1.22
73.6	-58.4106	-58.8684	-57.8308		-58.4106	-2.746
73.65	-58.3801	-58.6548	-57.7698		-58.3801	2.136
73.7	-58.197	-58.5327	-57.3425		-58.197	3.967
73.75	-57.9834	-58.96	-57.5256		-57.9834	-1.221
73.8	-58.3191	-58.8684	-57.8613		-58.3191	-3.967
73.85	-58.3801	-58.7769	-57.6172		-58.3801	1.221
73.9	-58.197	-58.5327	-57.5867		-58.197	3.662
73.95	-58.0139	-58.6243	-57.4036		-58.0139	-1.526
74	-58.3496	-58.96	-57.7393		-58.3496	-3.967
74.05	-58.4106	-58.8074	-57.7698		-58.4106	-0.305
74.1	-58.3801	-58.5327	-57.6477		-58.3801	3.051
74.15	-58.1055	-58.4106	-57.312		-58.1055	0.915
74.2	-58.2886	-58.7158	-57.6782		-58.2886	-3.051
74.25	-58.4106	-58.9294	-57.8308		-58.4106	-0.305
74.3	-58.3191	-58.7769	-57.7698		-58.3191	2.136
74.35	-58.197	-58.5937	-57.4341		-58.197	2.442
74.4	-58.0749	-58.7769	-57.5256		-58.0749	-2.747
74.45	-58.4717	-58.8989	-57.7698		-58.4717	-2.747
74.5	-58.3496	-58.7158	-57.6172		-58.3496	4.883
74.55	-57.9834	-58.4717	-57.2815		-57.9834	1.526
74.6	-58.197	-58.9294	-57.6782		-58.197	-4.272
74.65	-58.4106	-58.8074	-57.5561		-58.4106	0.305
74.7	-58.1665	-58.5022	-57.251		-58.1665	2.746
74.75	-58.136	-58.8684	-57.7393		-58.136	-2.747
74.8	-58.4412	-58.5937	-57.5561		-58.4412	0.916
74.85	-58.0444	-58.8074	-57.5561		-58.0444	0.916
74.9	-58.3496	-58.8074	-57.7698		-58.3496	-3.052
74.95	-58.3496	-58.5022	-57.2815		-58.3496	2.441
75	-58.1055	-58.8684	-57.6477		-58.1055	0.305
75.05	-58.3191	-58.5022	-57.251		-58.3191	2.137
75.1	-57.8918	-58.8684	-57.7698		-57.8918	1.21e-12
75.15	-58.3191	-58.3801	-57.312		-58.3191	0.61
75.2	-57.8308	-58.8684	-57.7087		-57.8308	-0.915
75.25	-58.4106	-58.4717	-57.4036		-58.4106	-1.526
75.3	-57.9834	-58.7769	-57.6172		-57.9834	0
75.35	-58.4106	-58.5022	-57.4951		-58.4106	0.61
75.4	-57.9224	-58.7158	-57.6477		-57.9224	0.305
75.45	-58.3801	-58.6853	-57.5561		-58.3801	-0.915
75.5	-58.0139	-58.7158	-57.6477		-58.0139	0
75.55	-58.3801	-58.6853	-57.6782		-58.3801	0.305
75.6	-57.9834	-58.5632	-57.6477		-57.9834	0.61
75.65	-58.3191	-58.8074	-57.5561		-58.3191	-0.61
75.7	-58.0444	-58.5327	-57.4951		-58.0444	-0.305
75.75	-58.3496	-58.7158	-57.6477		-58.3496	-0.305
75.8	-58.0749	-58.3801	-57.4036		-58.0749	1.526
75.85	-58.197	-58.8989	-57.7087		-58.197	-3.47e-13
75.9	-58.0749	-58.3496	-57.312		-58.0749	-3.47e-13
75.95	-58.197	-58.8379	-57.6782		-58.197	-1.221
76	-58.197	-58.4717	-57.312		-58.197	1.831
76.05	-58.0139	-58.6243	-57.8003		-58.0139	-1.221
76.1	-58.3191	-58.6853	-57.5256		-58.3191	0.61
76.15	-57.9529	-58.2886	-57.7087		-57.9529	0.916
76.2	-58.2275	-58.7463	-57.8308		-58.2275	0.916
76.25	-57.8613	-58.3191	-57.4951		-57.8613	-0.611
76.3	-58.2886	-58.7158	-57.8308		-58.2886	-1.221
76.35	-57.9834	-58.7158	-57.4036		-57.9834	1.526
76.4	-58.136	-58.2886	-57.8308		-58.136	-2.136
76.45	-58.197	-58.7769	-57.7087		-58.197	3.357
76.5	-57.8003	-58.3191	-57.6172		-57.8003	-0.916
76.55	-58.2886	-58.7158	-57.8003		-58.2886	-0.305
76.6	-57.8308	-58.6548	-57.312		-57.8308	0.916
76.65	-58.197	-58.1665	-57.8918		-58.197	-2.136
76.7	-58.0444	-58.6853	-57.6172		-58.0444	2.441
76.75	-57.9529	-58.4412	-57.4951		-57.9529	-1.831
76.8	-58.2275	-58.3801	-57.7087		-58.2275	2.747
76.85	-57.6782	-58.5632	-57.4951		-57.6782	0.915
76.9	-58.136	-58.1665	-57.8613		-58.136	-3.052
76.95	-57.9834	-58.7158	-57.7087		-57.9834	1.831
77	-57.9529	-58.5937	-57.4036		-57.9529	-1.526
77.05	-58.136	-58.2275	-57.8613		-58.136	3.052
77.1	-57.6477	-58.6548	-57.5256		-57.6477	1.39e-12
77.15	-58.136	-58.3801	-57.6477		-58.136	-4.272
77.2	-58.0749	-58.4717	-57.7393		-58.0749	3.357
77.25	-57.8003	-58.5937	-57.2815		-57.8003	-0.916
77.3	-58.1665	-58.1665	-57.8918		-58.1665	-0.305
77.35	-57.8308	-58.5937	-57.6782		-57.8308	-0.305
77.4	-58.197	-58.5632	-57.4951		-58.197	-3.357
77.45	-58.1665	-58.0749	-57.7698		-58.1665	4.577
77.5	-57.7393	-58.6548	-57.6477		-57.7393	0.305
77.55	-58.136	-58.4106	-57.7393		-58.136	-2.441
77.6	-57.9834	-58.2886	-57.7698		-57.9834	1.831
77.65	-57.9529	-58.7158	-57.4036		-57.9529	-2.441
77.7	-58.2275	-58.4106	-57.8613		-58.2275	1.526
77.75	-57.8003	-58.2275	-57.7393		-57.8003	1.22
77.8	-58.1055	-58.5937	-57.4951		-58.1055	-4.272
77.85	-58.2275	-58.3801	-57.8613		-58.2275	3.662
77.9	-57.7393	-58.2886	-57.6477		-57.7393	-1.39e-12
77.95	-58.2275	-58.4717	-57.5256		-58.2275	-3.051
78	-58.0444	-58.2886	-57.8308		-58.0444	1.526
78.05	-58.0749	-58.4106	-57.5561		-58.0749	-3.357
78.1	-58.3801	-58.4717	-57.6782		-58.3801	1.525
78.15	-57.9224	-58.1665	-57.8918		-57.9224	2.441
78.2	-58.136	-58.4106	-57.6172		-58.136	-2.746
78.25	-58.197	-58.5937	-57.7087		-58.197	3.357
78.3	-57.8003	-58.197	-57.8308		-57.8003	-1.221
78.35	-58.3191	-58.3801	-57.4646		-58.3191	-4.272
78.4	-58.2275	-58.5327	-57.8613		-58.2275	5.188
78.45	-57.8003	-58.1665	-57.9224		-57.8003	-0.916
78.5	-58.3191	-58.4412	-57.373		-58.3191	-3.662
78.55	-58.1665	-58.4717	-57.8003		-58.1665	5.188
78.6	-57.8003	-58.0444	-57.8613		-57.8003	-1.831
78.65	-58.3496	-58.3191	-57.4036		-58.3496	-3.967
78.7	-58.197	-58.3801	-57.8613		-58.197	3.357
78.75	-58.0139	-58.1055	-57.8918		-58.0139	-1.831
78.8	-58.3801	-58.197	-57.4951		-58.3801	-0.916
78.85	-58.1055	-58.3801	-58.0139		-58.1055	3.052
78.9	-58.0749	-58.2275	-57.8918		-58.0749	-2.441
78.95	-58.3496	-58.1665	-57.4646		-58.3496	-0.916
79	-58.1665	-58.4412	-57.8918		-58.1665	2.136
79.05	-58.136	-58.2581	-57.8613		-58.136	-1.221
79.1	-58.2886	-58.0444	-57.4646		-58.2886	-0.61
79.15	-58.197	-58.4106	-57.8613		-58.197	1.526
79.2	-58.136	-58.2886	-57.8918		-58.136	-1.831
79.25	-58.3801	-57.8613	-57.5867		-58.3801	-0.61
79.3	-58.197	-58.2581	-57.8003		-58.197	2.441
79.35	-58.136	-58.2275	-57.8918		-58.136	-3.052
79.4	-58.5022	-57.8918	-57.7087		-58.5022	-0.61
79.45	-58.197	-58.2275	-57.8003		-58.197	3.967
79.5	-58.1055	-58.2581	-57.9834		-58.1055	-2.442
79.55	-58.4412	-58.1665	-57.7393		-58.4412	-1.526
79.6	-58.2581	-58.0139	-57.5867		-58.2581	3.357
79.65	-58.1055	-58.2886	-57.9834		-58.1055	-2.136
79.7	-58.4717	-58.2275	-57.8308		-58.4717	-1.831
79.75	-58.2886	-57.9224	-57.4646		-58.2886	5.188
79.8	-57.9529	-58.3191	-57.8918		-57.9529	-2.136
79.85	-58.5022	-58.2581	-57.8613		-58.5022	-3.967
79.9	-58.3496	-57.8918	-57.4646		-58.3496	4.273
79.95	-58.0749	-58.0139	-57.7087		-58.0749	-0.305
80	-58.3801	-58.2275	-57.8308		-58.3801	-4.273
80.05	-58.5022	-58.0444	-57.6172		-58.5022	3.357
80.1	-58.0444	-57.8308	-57.6477		-58.0444	3.357
80.15	-58.1665	-58.2581	-58.0139		-58.1665	-4.273
80.2	-58.4717	-58.2581	-57.8308		-58.4717	0
80.25	-58.1665	-58.0139	-57.4036		-58.1665	3.968
80.3	-58.0749	-57.9529	-57.8918		-58.0749	-2.747
80.35	-58.4412	-58.3496	-57.8308		-58.4412	-2.442
80.4	-58.3191	-58.2275	-57.6172		-58.3191	3.663
80.45	-58.0749	-57.8918	-57.6172		-58.0749	-1.221
80.5	-58.4412	-58.197	-57.8308		-58.4412	-3.968
80.55	-58.4717	-58.2275	-57.8918		-58.4717	2.442
80.6	-58.197	-58.0749	-57.4341		-58.197	2.136
80.65	-58.2581	-57.7393	-57.8308		-58.2581	-4.578
80.7	-58.6548	-58.2886	-57.8918		-58.6548	-1.831
80.75	-58.4412	-58.2581	-57.8003		-58.4412	6.104
80.8	-58.0444	-58.0749	-57.5561		-58.0444	-0.61
80.85	-58.5022	-58.0139	-57.9224		-58.5022	-3.662
80.9	-58.4106	-58.3801	-57.9224		-58.4106	2.136
80.95	-58.2886	-58.2581	-57.6477		-58.2886	2.441
81	-58.1665	-58.0749	-57.7087		-58.1665	-2.136
81.05	-58.5022	-58.0749	-58.0139		-58.5022	-3.052
81.1	-58.4717	-58.4106	-57.8308		-58.4717	3.662
81.15	-58.136	-58.2886	-57.5561		-58.136	1.526
81.2	-58.3191	-58.0139	-57.8003		-58.3191	-4.272
81.25	-58.5632	-58.0139	-57.9834		-58.5632	-0.61
81.3	-58.3801	-58.2886	-57.8308		-58.3801	4.883
81.35	-58.0749	-58.2886	-57.5867		-58.0749	-0.611
81.4	-58.4412	-58.1055	-57.9834		-58.4412	-4.273
81.45	-58.5022	-57.9834	-58.0749		-58.5022	0.611
81.5	-58.3801	-58.3801	-57.9224		-58.3801	3.357
81.55	-58.1665	-58.2581	-57.6172		-58.1665	-2.136
81.6	-58.5937	-58.0444	-57.9834		-58.5937	-3.357
81.65	-58.5022	-57.8308	-58.1055		-58.5022	3.356
81.7	-58.2581	-58.3801	-57.9529		-58.2581	2.747
81.75	-58.2275	-58.2886	-57.5867		-58.2275	-3.356
81.8	-58.5937	-58.1665	-57.9224		-58.5937	-3.357
81.85	-58.5632	-57.8613	-58.1055		-58.5632	3.051
81.9	-58.2886	-58.136	-58.0444		-58.2886	2.746
81.95	-58.2886	-58.2581	-57.7698		-58.2886	-3.967
82	-58.6853	-58.2275	-57.8918		-58.6853	-2.136
82.05	-58.5022	-57.9834	-58.1665		-58.5022	3.357
82.1	-58.3496	-57.9529	-58.1665		-58.3496	1.831
82.15	-58.3191	-58.4106	-57.8308		-58.3191	-3.357
82.2	-58.6853	-58.2581	-57.8308		-58.6853	-2.441
82.25	-58.5632	-58.197	-58.1665		-58.5632	2.747
82.3	-58.4106	-57.8918	-58.136		-58.4106	4.577
82.35	-58.1055	-58.197	-58.0139		-58.1055	-1.221
82.4	-58.5327	-58.4717	-57.6477		-58.5327	-4.577
82.45	-58.5632	-58.3191	-58.0139		-58.5632	0.61
82.5	-58.4717	-58.0749	-58.136		-58.4717	4.272
82.55	-58.136	-57.8918	-58.1665		-58.136	-0.305
82.6	-58.5022	-58.197	-57.8308		-58.5022	-5.188
82.65	-58.6548	-58.2581	-57.8613		-58.6548	-1.221
82.7	-58.6243	-58.1055	-58.3191		-58.6243	3.052
82.75	-58.3496	-57.8613	-58.2581		-58.3496	0.916
82.8	-58.5327	-58.3801	-57.9529		-58.5327	-4.273
82.85	-58.7769	-58.2886	-58.0139		-58.7769	-0.61
82.9	-58.5937	-57.9224	-58.2886		-58.5937	5.799
82.95	-58.197	-58.3191	-58.0749		-58.197	-0.916
83	-58.6853	-58.4106	-58.0444		-58.6853	-4.883
83.05	-58.6853	-57.9529	-58.2886		-58.6853	4.883
83.1	-58.197	-58.4412	-57.8613		-58.197	1.39e-12
83.15	-58.6853	-58.1665	-58.136		-58.6853	-3.052
83.2	-58.5022	-58.1665	-58.197		-58.5022	2.136
83.25	-58.4717	-58.3496	-57.8003		-58.4717	-3.052
83.3	-58.8074	-58.0139	-58.197		-58.8074	3.357
83.35	-58.136	-58.4106	-57.8918		-58.136	1.526
83.4	-58.6548	-57.8613	-58.3801		-58.6548	-2.136
83.45	-58.3496	-58.4717	-57.8918		-58.3496	-0.915
83.5	-58.7463	-58.0139	-58.4106		-58.7463	-0.61
83.55	-58.4106	-58.4412	-57.9834		-58.4106	1.22
83.6	-58.6243	-58.197	-58.3191		-58.6243	0.61
83.65	-58.3496	-58.4717	-58.1055		-58.3496	-7.81e-13
83.7	-58.6243	-58.3191	-58.2581		-58.6243	-0.61
83.75	-58.4106	-58.3496	-58.0749		-58.4106	0.306
83.8	-58.5937	-58.2581	-58.2886		-58.5937	-0.306
83.85	-58.4412	-58.2886	-58.0749		-58.4412	-0.611
83.9	-58.6548	-58.2886	-58.2581		-58.6548	-1.22
83.95	-58.5632	-58.2581	-58.1055		-58.5632	0.611
84	-58.5937	-58.3801	-58.2581		-58.5937	0.305
84.05	-58.5327	-58.0444	-58.3191		-58.5327	0.305
84.1	-58.5632	-58.4717	-58.0444		-58.5632	-8.67e-14
84.15	-58.5327	-57.9529	-58.2886		-58.5327	0.305
84.2	-58.5327	-58.4106	-58.0749		-58.5327	0
84.25	-58.5327	-58.1055	-58.4106		-58.5327	1.526
84.3	-58.3801	-58.4412	-57.8613		-58.3801	-0.61
84.35	-58.5937	-58.3496	-58.2886		-58.5937	0.915
84.4	-58.2886	-58.197	-57.8918		-58.2886	-8.67e-13
84.45	-58.5937	-58.4106	-58.3191		-58.5937	1.526
84.5	-58.136	-57.9529	-58.2886		-58.136	-1.221
84.55	-58.7158	-58.3801	-58.136		-58.7158	-2.746
84.6	-58.4106	-58.197	-58.3191		-58.4106	2.136
84.65	-58.5022	-58.2886	-57.9224		-58.5022	-1.221
84.7	-58.5327	-58.4106	-58.4106		-58.5327	1.221
84.75	-58.3801	-58.0139	-58.1665		-58.3801	-2.442
84.8	-58.7769	-58.4106	-58.2581		-58.7769	2.441
84.85	-58.136	-58.2275	-58.4412		-58.136	1.832
84.9	-58.5937	-58.2581	-58.0139		-58.5937	-1.831
84.95	-58.3191	-58.5022	-58.4106		-58.3191	0.61
85	-58.5327	-58.1055	-58.0444		-58.5327	-3.357
85.05	-58.6548	-58.4106	-58.197		-58.6548	3.662
85.1	-58.1665	-58.2581	-58.2886		-58.1665	0.305
85.15	-58.6243	-58.136	-57.8308		-58.6243	-2.136
85.2	-58.3801	-58.3801	-58.3801		-58.3801	-0.305
85.25	-58.6548	-58.0749	-58.0749		-58.6548	-2.442
85.3	-58.6243	-58.3191	-58.3191		-58.6243	4.273
85.35	-58.2275	-58.3191	-58.3801		-58.2275	-0.61
85.4	-58.6853	-57.9224	-57.8613		-58.6853	-1.831
85.45	-58.4106	-58.3496	-58.4106		-58.4106	1.526
85.5	-58.5327	-58.2275	-58.3496		-58.5327	-2.442
85.55	-58.6548	-58.0749	-58.1665		-58.6548	3.357
85.6	-58.197	-58.5022	-58.4106		-58.197	0.305
85.65	-58.6243	-58.1665	-58.0749		-58.6243	-1.526
85.7	-58.3496	-58.2886	-58.2886		-58.3496	2.137
85.75	-58.4106	-58.3801	-58.3801		-58.4106	-1.831
85.8	-58.5327	-57.9224	-58.0444		-58.5327	1.525
85.85	-58.2581	-58.3496	-58.4717		-58.2581	-1.221
85.9	-58.6548	-58.4106	-58.2886		-58.6548	-2.746
85.95	-58.5327	-57.9834	-58.136		-58.5327	3.357
86	-58.3191	-58.3496	-58.5327		-58.3191	-1.831
86.05	-58.7158	-58.2275	-58.2581		-58.7158	-1.221
86.1	-58.4412	-58.0749	-58.3496		-58.4412	1.831
86.15	-58.5327	-58.5327	-58.5937		-58.5327	-1.831
86.2	-58.6243	-58.2275	-58.2275		-58.6243	3.052
86.25	-58.2275	-58.2581	-58.4412		-58.2275	0
86.3	-58.6243	-58.5937	-58.4717		-58.6243	-3.662
86.35	-58.5937	-58.2275	-58.0139		-58.5937	4.273
86.4	-58.197	-58.3191	-58.5022		-58.197	-1.13e-12
86.45	-58.5937	-58.5327	-58.4412		-58.5937	-2.747
86.5	-58.4717	-58.197	-58.0444		-58.4717	1.831
86.55	-58.4106	-58.3191	-58.4412		-58.4106	-1.526
86.6	-58.6243	-58.4717	-58.3496		-58.6243	-6.08e-13
86.65	-58.4106	-58.197	-58.0749		-58.4106	0.611
86.7	-58.5632	-58.3191	-58.4106		-58.5632	-3.052
86.75	-58.7158	-58.5327	-58.2886		-58.7158	2.441
86.8	-58.3191	-58.2886	-58.0749		-58.3191	1.526
86.85	-58.5632	-58.3191	-58.5022		-58.5632	-2.746
86.9	-58.5937	-58.5632	-58.1055		-58.5937	3.662
86.95	-58.197	-58.3801	-58.0139		-58.197	-0.306
87	-58.6243	-58.2275	-58.3191		-58.6243	-3.662
87.05	-58.5632	-58.5632	-58.0749		-58.5632	4.273
87.1	-58.197	-58.4106	-57.9834		-58.197	-1.831
87.15	-58.7463	-58.3191	-58.2581		-58.7463	-3.357
87.2	-58.5327	-58.5937	-57.9834		-58.5327	4.882
87.25	-58.2581	-58.3801	-57.9834		-58.2581	-2.442
87.3	-58.7769	-58.1665	-58.2275		-58.7769	-3.662
87.35	-58.6243	-58.5937	-58.0139		-58.6243	4.273
87.4	-58.3496	-58.4717	-57.9529		-58.3496	-0.915
87.45	-58.7158	-58.197	-58.3801		-58.7158	-1.526
87.5	-58.5022	-58.5632	-58.136		-58.5022	3.967
87.55	-58.3191	-58.5632	-57.8308		-58.3191	-1.831
87.6	-58.6853	-58.2275	-58.2886		-58.6853	-2.136
87.65	-58.5327	-58.5632	-58.136		-58.5327	4.578
87.7	-58.2275	-58.5632	-57.7698		-58.2275	-1.526
87.75	-58.6853	-58.2886	-58.2581		-58.6853	-4.883
87.8	-58.7158	-58.5022	-58.1055		-58.7158	4.272
87.85	-58.2581	-58.6548	-57.6477		-58.2581	1.3e-12
87.9	-58.7158	-58.3496	-58.2275		-58.7158	-4.272
87.95	-58.6853	-58.3496	-58.1055		-58.6853	3.662
88	-58.3496	-58.6853	-57.7698		-58.3496	-0.61
88.05	-58.7463	-58.4412	-58.0139		-58.7463	-2.747
88.1	-58.6243	-58.2275	-58.136		-58.6243	3.967
88.15	-58.3496	-58.6853	-58.0139		-58.3496	-0.305
88.2	-58.6548	-58.6548	-57.8613		-58.6548	-3.357
88.25	-58.6853	-58.2886	-58.2275		-58.6853	1.831
88.3	-58.4717	-58.6243	-58.0749		-58.4717	2.136
88.35	-58.4717	-58.7463	-57.6477		-58.4717	-1.831
88.4	-58.6548	-58.4717	-58.197		-58.6548	-1.526
88.45	-58.6243	-58.5937	-58.0749		-58.6243	3.052
88.5	-58.3496	-58.8379	-57.7393		-58.3496	-2.136
88.55	-58.8379	-58.6243	-57.9224		-58.8379	-3.662
88.6	-58.7158	-58.3496	-58.1055		-58.7158	4.273
88.65	-58.4106	-58.7769	-57.9834		-58.4106	-1.526
88.7	-58.8684	-58.6853	-57.6782		-58.8684	-4.273
88.75	-58.8379	-58.2886	-58.197		-58.8379	4.272
88.8	-58.4412	-58.5937	-58.136		-58.4412	2.136
88.85	-58.6243	-58.8074	-57.7393		-58.6243	-3.662
88.9	-58.8074	-58.6853	-57.9529		-58.8074	-0.61
88.95	-58.6853	-58.3496	-58.136		-58.6853	3.968
89	-58.4106	-58.8074	-57.9834		-58.4106	-1.221
89.05	-58.8074	-58.7769	-57.6477		-58.8074	-4.273
89.1	-58.8379	-58.5327	-58.0749		-58.8379	3.357
89.15	-58.4717	-58.5632	-57.9529		-58.4717	2.136
89.2	-58.6243	-58.8074	-57.8003		-58.6243	-3.357
89.25	-58.8074	-58.6853	-57.7087		-58.8074	-0.915
89.3	-58.7158	-58.3191	-58.0139		-58.7158	2.747
89.35	-58.5327	-58.6548	-57.8918		-58.5327	-1.526
89.4	-58.8684	-58.8074	-57.6782		-58.8684	-3.052
89.45	-58.8379	-58.6243	-57.8918		-58.8379	2.747
89.5	-58.5937	-58.4106	-58.0139		-58.5937	2.747
89.55	-58.5632	-58.7769	-58.0139		-58.5632	-3.663
89.6	-58.96	-58.8074	-57.5867		-58.96	-2.747
89.65	-58.8379	-58.7158	-57.9529		-58.8379	4.883
89.7	-58.4717	-58.3801	-57.9834		-58.4717	0.305
89.75	-58.8074	-58.8684	-57.8613		-58.8074	-3.967
89.8	-58.8684	-58.7769	-57.4341		-58.8684	0
89.85	-58.8074	-58.6243	-57.8918		-58.8074	3.357
89.9	-58.5327	-58.2886	-58.0444		-58.5327	-1.526
89.95	-58.96	-58.6548	-57.8613		-58.96	-4.578
90	-58.9905	-58.7158	-57.4341		-58.9905	1.526
90.05	-58.8074	-58.5937	-57.9224		-58.8074	4.273
90.1	-58.5632	-58.2886	-57.9529		-58.5632	-0.915
90.15	-58.8989	-58.7158	-57.8003		-58.8989	-3.968
90.2	-58.96	-58.8074	-57.5256		-58.96	1.22
90.25	-58.7769	-58.6243	-57.8918		-58.7769	4.273
90.3	-58.5327	-58.4106	-58.1055		-58.5327	-1.22
90.35	-58.8989	-58.6243	-57.9224		-58.8989	-4.273
90.4	-58.96	-58.8074	-57.5561		-58.96	1.22
90.45	-58.7769	-58.7463	-57.7393		-58.7769	4.578
90.5	-58.5022	-58.3496	-57.9529		-58.5022	-1.22
90.55	-58.8989	-58.3496	-57.8613		-58.8989	-5.188
90.6	-59.021	-58.7158	-57.6477		-59.021	-0.611
90.65	-58.96	-58.6853	-57.4341		-58.96	5.188
90.7	-58.5022	-58.5937	-57.9529		-58.5022	1.221
90.75	-58.8379	-58.2275	-57.8308		-58.8379	-4.578
90.8	-58.96	-58.6548	-57.7393		-58.96	0
90.85	-58.8379	-58.8074	-57.4341		-58.8379	3.968
90.9	-58.5632	-58.7158	-57.6782		-58.5632	2.136
90.95	-58.6243	-58.4412	-57.9529		-58.6243	-3.662
91	-58.9294	-58.5937	-57.7698		-58.9294	-3.357
91.05	-58.96	-58.8379	-57.4036		-58.96	3.051
91.1	-58.6243	-58.7463	-57.6477		-58.6243	3.968
91.15	-58.5632	-58.2886	-57.7698		-58.5632	-3.051
91.2	-58.9294	-58.6243	-57.5867		-58.9294	-3.052
91.25	-58.8684	-58.6548	-57.373		-58.8684	3.967
91.3	-58.5327	-58.2275	-57.8308		-58.5327	0
91.35	-58.8684	-58.6853	-57.7087		-58.8684	-3.052
91.4	-58.8379	-58.5632	-57.5256		-58.8379	4.272
91.45	-58.4412	-58.4717	-57.8003		-58.4412	-0.61
91.5	-58.8989	-58.7769	-57.4036		-58.8989	-4.577
91.55	-58.8989	-58.2581	-57.8308		-58.8989	3.052
91.6	-58.5937	-58.7769	-57.7087		-58.5937	0.61
91.65	-58.8379	-58.5022	-57.5867		-58.8379	1.525
91.7	-58.4412	-58.7463	-57.7393		-58.4412	-1.221
91.75	-58.96	-58.5327	-57.3425		-58.96	0
91.8	-58.4412	-58.6243	-57.7698		-58.4412	0.611
91.85	-58.8989	-58.5632	-57.251		-58.8989	-2.136
91.9	-58.6548	-58.4717	-57.7698		-58.6548	-0.305
91.95	-58.9294	-58.6853	-57.2815		-58.9294	0.916
92	-58.5632	-58.4412	-57.8308		-58.5632	0.915
92.05	-58.8379	-58.6548	-57.3425		-58.8379	-0.916
92.1	-58.6548	-58.5022	-57.7698		-58.6548	0.916
92.15	-58.7463	-58.7463	-57.2815		-58.7463	-0.61
92.2	-58.7158	-58.3496	-57.8613		-58.7158	0.305
92.25	-58.7158	-58.6548	-57.3425		-58.7158	1.221
92.3	-58.5937	-58.3801	-57.8003		-58.5937	-0.916
92.35	-58.8074	-58.6243	-57.373		-58.8074	-0.611
92.4	-58.6548	-58.2886	-57.7393		-58.6548	1.526
92.45	-58.6548	-58.6853	-57.5256		-58.6548	0
92.5	-58.6548	-58.1665	-57.7393		-58.6548	-0.61
92.55	-58.7158	-58.6853	-57.6172		-58.7158	-1.831
92.6	-58.8379	-58.4717	-57.5256		-58.8379	2.441
92.65	-58.4717	-58.6243	-57.8308		-58.4717	-0.305
92.7	-58.8684	-58.5632	-57.4646		-58.8684	0.916
92.75	-58.3801	-58.3801	-57.7698		-58.3801	1.221
92.8	-58.7463	-58.6243	-57.4036		-58.7463	0.61
92.85	-58.3191	-58.136	-57.8918		-58.3191	0.61
92.9	-58.6853	-58.7158	-57.6782		-58.6853	-0.915
92.95	-58.4106	-58.5632	-57.6782		-58.4106	0.305
93	-58.6548	-58.5937	-57.7698		-58.6548	-1.831
93.05	-58.5937	-58.6548	-57.312		-58.5937	3.052
93.1	-58.3496	-58.197	-57.7698		-58.3496	-0.916
93.15	-58.6853	-58.7463	-57.4341		-58.6853	1.221
93.2	-58.2275	-58.3496	-57.7393		-58.2275	-1.526
93.25	-58.8379	-58.5022	-57.7087		-58.8379	-2.747
93.3	-58.5022	-58.6243	-57.373		-58.5022	2.747
93.35	-58.5632	-58.197	-57.9224		-58.5632	-2.136
93.4	-58.7158	-58.7158	-57.5561		-58.7158	2.746
93.45	-58.2886	-58.5327	-57.7393		-58.2886	-0.611
93.5	-58.7769	-58.5022	-57.8003		-58.7769	-0.915
93.55	-58.3801	-58.7158	-57.3425		-58.3801	2.442
93.6	-58.5327	-58.3496	-57.8308		-58.5327	-2.442
93.65	-58.6243	-58.8074	-57.5867		-58.6243	3.052
93.7	-58.2275	-58.6243	-57.5256		-58.2275	-0.915
93.75	-58.7158	-58.3496	-57.7698		-58.7158	-2.442
93.8	-58.4717	-58.7463	-57.2815		-58.4717	1.526
93.85	-58.5632	-58.4412	-57.7393		-58.5632	-1.831
93.9	-58.6548	-58.5937	-57.6477		-58.6548	3.967
93.95	-58.1665	-58.7158	-57.4646		-58.1665	-0.61
94	-58.7158	-58.1665	-57.8308		-58.7158	-3.662
94.05	-58.5327	-58.8074	-57.5256		-58.5327	3.357
94.1	-58.3801	-58.6548	-57.6172		-58.3801	-0.916
94.15	-58.6243	-58.2886	-57.8308		-58.6243	1.526
94.2	-58.2275	-58.7463	-57.312		-58.2275	1.526
94.25	-58.4717	-58.6243	-57.8003		-58.4717	-4.273
94.3	-58.6548	-58.5327	-57.7087		-58.6548	2.442
94.35	-58.2275	-58.8074	-57.312		-58.2275	0.305
94.4	-58.6243	-58.4106	-57.8308		-58.6243	-2.137
94.45	-58.4412	-58.6243	-57.6477		-58.4412	2.137
94.5	-58.4106	-58.7463	-57.4646		-58.4106	-2.746
94.55	-58.7158	-58.2886	-57.6477		-58.7158	2.441
94.6	-58.1665	-58.6853	-57.5561		-58.1665	1.831
94.65	-58.5327	-58.5327	-57.6477		-58.5327	-4.272
94.7	-58.5937	-58.3496	-57.7698		-58.5937	3.357
94.75	-58.197	-58.7463	-57.4036		-58.197	-0.916
94.8	-58.6853	-58.5632	-57.7393		-58.6853	-2.747
94.85	-58.4717	-58.2581	-57.8003		-58.4717	4.578
94.9	-58.2275	-58.7158	-57.312		-58.2275	-1.526
94.95	-58.6243	-58.6243	-57.8003		-58.6243	-1.526
95	-58.3801	-58.3496	-57.7087		-58.3801	2.442
95.05	-58.3801	-58.7463	-57.312		-58.3801	-2.442
95.1	-58.6243	-58.4412	-57.7698		-58.6243	-6.94e-13
95.15	-58.3801	-58.3496	-57.6172		-58.3801	0.306
95.2	-58.5937	-58.6853	-57.2815		-58.5937	-1.831
95.25	-58.5632	-58.5327	-57.9224		-58.5632	2.441
95.3	-58.3496	-58.3191	-57.7393		-58.3496	-0.916
95.35	-58.6548	-58.8074	-57.3425		-58.6548	-2.441
95.4	-58.5937	-58.5937	-57.8003		-58.5937	4.273
95.45	-58.2275	-58.3496	-57.7087		-58.2275	-0.306
95.5	-58.6243	-58.7769	-57.4646		-58.6243	-3.052
95.55	-58.5327	-58.5632	-57.8308		-58.5327	4.883
95.6	-58.136	-58.4717	-57.6782		-58.136	-0.61
95.65	-58.5937	-58.7769	-57.3425		-58.5937	-5.188
95.7	-58.6548	-58.5937	-57.8003		-58.6548	4.272
95.75	-58.1665	-58.3496	-57.7698		-58.1665	-0.305
95.8	-58.6853	-58.7158	-57.2815		-58.6853	-5.188
95.85	-58.6853	-58.6243	-57.7393		-58.6853	5.493
95.9	-58.136	-58.3496	-57.7393		-58.136	0.61
95.95	-58.6243	-58.6853	-57.251		-58.6243	-5.798
96	-58.7158	-58.6853	-57.6782		-58.7158	3.052
96.05	-58.3191	-58.3191	-57.7393		-58.3191	0.915
96.1	-58.6243	-58.6243	-57.373		-58.6243	-3.357
96.15	-58.6548	-58.7158	-57.8003		-58.6548	4.883
96.2	-58.136	-58.4106	-57.7698		-58.136	1.221
96.25	-58.5327	-58.6548	-57.4951		-58.5327	-4.272
96.3	-58.5632	-58.6548	-57.5256		-58.5632	3.052
96.35	-58.2275	-58.4717	-57.7087		-58.2275	1.526
96.4	-58.4106	-58.4412	-57.5561		-58.4106	-3.968
96.45	-58.6243	-58.7158	-57.373		-58.6243	0.915
96.5	-58.3191	-58.6243	-57.7393		-58.3191	3.662
96.55	-58.2581	-58.2275	-57.6782		-58.2581	-2.746
96.6	-58.5937	-58.6243	-57.251		-58.5937	-1.22
96.65	-58.3801	-58.7158	-57.6782		-58.3801	3.662
96.7	-58.2275	-58.3496	-57.7087		-58.2275	-2.136
96.75	-58.5937	-58.5327	-57.4646		-58.5937	-2.137
96.8	-58.4412	-58.6548	-57.5561		-58.4412	5.188
96.85	-58.0749	-58.5632	-57.7087		-58.0749	-0.61
96.9	-58.5022	-58.3191	-57.5561		-58.5022	-3.663
96.95	-58.4412	-58.6853	-57.251		-58.4412	3.662
97	-58.136	-58.5937	-57.7087		-58.136	0
97.05	-58.4412	-58.2581	-57.6477		-58.4412	-4.272
97.1	-58.5632	-58.3496	-57.2815		-58.5632	0.306
97.15	-58.4106	-58.7158	-57.4036		-58.4106	4.577
97.2	-58.1055	-58.3801	-57.7087		-58.1055	-1.526
97.25	-58.5632	-58.1055	-57.5256		-58.5632	-3.967
97.3	-58.5022	-58.5937	-57.251		-58.5022	3.967
97.35	-58.1665	-58.4717	-57.7087		-58.1665	1.221
97.4	-58.3801	-58.2886	-57.7087		-58.3801	-3.052
97.45	-58.4717	-58.1665	-57.5561		-58.4717	0.915
97.5	-58.2886	-58.5632	-57.373		-58.2886	3.357
97.55	-58.136	-58.5632	-57.7698		-58.136	-2.441
97.6	-58.5327	-58.136	-57.7087		-58.5327	-2.746
97.65	-58.4106	-58.197	-57.2815		-58.4106	3.357
97.7	-58.197	-58.5022	-57.5867		-58.197	-0.306
97.75	-58.4412	-58.3191	-57.6782		-58.4412	-3.662
97.8	-58.5632	-58.1055	-57.5561		-58.5632	0.611
97.85	-58.3801	-58.2886	-57.2815		-58.3801	4.272
97.9	-58.136	-58.3801	-57.5256		-58.136	-2.136
97.95	-58.5937	-58.3801	-57.7393		-58.5937	-4.272
98	-58.5632	-57.9834	-57.6172		-58.5632	3.051
98.05	-58.2886	-58.2886	-57.251		-58.2886	3.967
98.1	-58.1665	-58.4412	-57.7698		-58.1665	-2.136
98.15	-58.5022	-58.3496	-57.6477		-58.5022	-3.052
98.2	-58.4717	-58.0444	-57.5561		-58.4717	3.052
98.25	-58.197	-58.197	-57.2815		-58.197	2.136
98.3	-58.2581	-58.4412	-57.6477		-58.2581	-3.662
98.35	-58.5632	-58.3496	-57.7698		-58.5632	-2.441
98.4	-58.5022	-58.0139	-57.5867		-58.5022	3.051
98.45	-58.2581	-58.2275	-57.2205		-58.2581	2.136
98.5	-58.2886	-58.4412	-57.6782		-58.2886	-3.662
98.55	-58.6243	-58.3191	-57.7393		-58.6243	-2.136
98.6	-58.5022	-58.1055	-57.6477		-58.5022	3.968
98.65	-58.2275	-58.0444	-57.3425		-58.2275	3.052
98.7	-58.197	-58.4106	-57.6782		-58.197	-2.442
98.75	-58.4717	-58.3496	-57.8918		-58.4717	-2.442
98.8	-58.4412	-58.2275	-57.8308		-58.4412	2.136
98.85	-58.2581	-58.1055	-57.4646		-58.2581	2.747
98.9	-58.1665	-58.2886	-57.4951		-58.1665	-2.136
98.95	-58.4717	-58.4106	-57.8308		-58.4717	-2.747
99	-58.4412	-58.3496	-57.8003		-58.4412	1.831
99.05	-58.2886	-58.0444	-57.5867		-58.2886	3.663
99.1	-58.0749	-58.1665	-57.312		-58.0749	-1.831
99.15	-58.4717	-58.4412	-57.7393		-58.4717	-4.273
99.2	-58.5022	-58.3801	-57.8918		-58.5022	0.611
99.25	-58.4106	-58.2275	-57.8003		-58.4106	3.357
99.3	-58.1665	-58.0444	-57.5256		-58.1665	0.915
99.35	-58.3191	-58.4412	-57.6782		-58.3191	-4.272
99.4	-58.5937	-58.4106	-58.0139		-58.5937	-2.136
99.45	-58.5327	-58.2275	-57.8308		-58.5327	4.577
99.5	-58.136	-58.2581	-57.4341		-58.136	1.831
99.55	-58.3496	-58.4717	-57.9529		-58.3496	-3.357
99.6	-58.4717	-58.2581	-57.8918		-58.4717	0.61
99.65	-58.2886	-58.2886	-57.5256		-58.2886	2.442
99.7	-58.2275	-58.4412	-57.8918		-58.2275	-2.136
99.75	-58.5022	-58.1055	-57.8308		-58.5022	-1.221
99.8	-58.3496	-58.4412	-57.5561		-58.3496	1.831
99.85	-58.3191	-58.2886	-57.9834		-58.3191	-2.441
99.9	-58.5937	-58.197	-57.5561		-58.5937	1.831
[truncated: 602 more rows]

## Sheet: Figure 1d
Time	Current Apical SGN (mV)		pA)							Mechanically evoked current traces elicited from a SGN from the apical aspects of the cochlea (in pA)
0	-2.29707	-0.230942	-1.6496	2.24345	2.89504	-4.90756	2.07849	-0.952644
0.05	-0.771187	0.684586	-0.123718	-2.02901	-1.37742	-4.2972	0.552612	1.18359
0.1	2.58575	-2.97752	1.40216	1.02275	-1.68259	-1.24544	3.29919	-0.342293
0.15	-1.07636	-1.75682	3.23321	-1.11348	3.20022	-1.8558	0.247437	-0.342293
0.2	-0.771187	-2.67235	1.40216	-1.11348	-1.68259	-4.2972	3.29919	0.573235
0.25	1.9754	-2.67235	-0.123718	1.32793	-1.37742	-4.2972	-1.58362	2.40429
0.3	1.36504	0.37941	0.486633	0.107224	2.58987	-3.99203	2.38367	-1.86817
0.35	-1.07636	-2.97752	1.09699	3.46416	-0.461891	-2.77132	-0.973267	-0.952644
0.4	1.36504	-1.45165	2.92804	-1.41865	-1.07224	-1.8558	-0.973267	1.18359
0.45	4.11163	0.074234	3.23321	1.02275	1.36916	-3.38168	0.247437	0.87841
0.5	-0.160835	-1.14647	0.181458	-1.11348	-1.37742	-3.68685	-0.057739	-2.47852
0.55	1.05987	0.989761	-0.428894	-1.72383	-1.68259	-3.0765	3.60437	-2.17335
0.6	3.80645	-0.841293	-0.123718	1.02275	1.67434	-0.940269	-0.668091	1.79394
0.65	3.50127	-2.062	-1.6496	-2.33418	-1.07224	1.19596	2.99402	-0.037117
0.7	-0.160835	2.51564	-0.428894	1.93828	-1.37742	-1.24544	-0.057739	-1.25782
0.75	0.449516	-2.67235	-0.123718	-2.33418	-0.461891	-2.46615	0.247437	-1.86817
0.8	2.89092	-1.45165	-2.56513	-1.72383	0.453636	-1.8558	1.77331	2.09911
0.85	-1.07636	0.684586	-4.091	1.02275	-1.07224	-0.635094	-0.668091	-0.037117
0.9	-1.38154	-2.36717	-3.17548	-0.808304	0.14846	0.890785	1.77331	-1.86817
0.95	0.144341	-1.75682	-1.6496	3.46416	1.67434	-0.329918	0.247437	0.268059
1	1.05987	-1.14647	1.09699	-0.808304	-1.37742	-3.0765	-0.057739	3.62499
1.05	-1.99189	-2.36717	-1.6496	0.107224	-0.156715	-2.77132	3.29919	1.18359
1.1	-1.68671	-0.230942	-2.8703	1.02275	1.97951	-2.16097	-0.973267	-0.037117
1.15	1.9754	-2.36717	-1.34442	-0.808304	-1.07224	-0.329918	1.16296	0.268059
1.2	0.754692	-3.89305	2.92804	2.85381	-1.07224	0.890785	2.07849	3.31982
1.25	-1.07636	0.074234	-0.428894	-2.33418	2.58987	-1.24544	-0.973267	-0.647469
1.3	-1.07636	-2.97752	-1.34442	0.107224	-1.98777	-2.46615	1.77331	-1.563
1.35	1.9754	-3.89305	0.791809	0.717575	-2.9033	-2.77132	-0.668091	-0.647469
1.4	-0.771187	0.074234	0.486633	-2.02901	0.453636	-3.68685	-0.057739	1.79394
1.45	-2.29707	-4.80858	0.791809	1.32793	-0.461891	-1.8558	1.77331	-0.952644
1.5	-0.771187	-2.97752	2.92804	-2.33418	-2.59812	0.585609	-2.19397	-2.47852
1.55	1.67022	0.074234	1.09699	-1.41865	-0.461891	-2.77132	-1.88879	-1.86817
1.6	-1.38154	-2.67235	0.486633	1.6331	1.67434	-4.90756	1.77331	0.87841
1.65	-1.99189	-2.062	3.23321	-1.72383	-1.68259	-3.68685	-2.80432	-0.342293
1.7	-0.771187	0.989761	-0.428894	0.717575	-0.767067	-0.635094	-0.973267	-1.563
1.75	1.05987	-2.062	1.40216	-0.808304	1.36916	-1.24544	2.38367	-1.86817
1.8	-1.99189	-1.45165	0.791809	-1.41865	0.453636	-2.46615	-0.668091	0.268059
1.85	-2.29707	1.29494	-0.123718	2.24345	-1.07224	-0.635094	0.552612	0.573235
1.9	-1.07636	-2.062	0.791809	-0.808304	0.14846	3.33219	2.38367	-1.86817
1.95	1.05987	-1.45165	-2.8703	0.412399	1.97951	1.19596	-0.362915	-2.47852
2	-1.68671	0.684586	1.09699	1.6331	-2.29295	0.585609	1.16296	-0.037117
2.05	-1.68671	-4.19823	-4.39618	-1.11348	-1.07224	3.63737	0.857788	1.79394
2.1	-0.466011	-2.97752	-1.6496	2.24345	1.36916	-0.329918	-1.88879	-1.25782
2.15	1.67022	0.684586	-2.8703	0.107224	0.453636	1.19596	-0.362915	-2.7837
2.2	0.754692	-3.89305	-2.56513	0.412399	-2.29295	2.41666	0.857788	-1.563
2.25	-1.38154	-3.58787	-0.428894	3.76933	0.14846	-1.8558	-0.668091	0.268059
2.3	-1.07636	0.684586	-1.6496	-1.11348	3.20022	0.585609	1.16296	-0.342293
2.35	1.67022	-2.062	2.92804	1.02275	-0.156715	-2.77132	1.77331	-3.39405
2.4	1.67022	-1.45165	-2.25995	4.68486	0.453636	-1.8558	-0.668091	-3.08887
2.45	-1.68671	2.51564	0.181458	0.107224	1.97951	-1.24544	1.77331	-1.563
2.5	-0.466011	-0.536118	-1.34442	1.02275	3.50539	-3.0765	1.46814	0.268059
2.55	-0.160835	-0.230942	-1.95477	1.93828	-0.156715	1.50114	-1.27844	0.268059
2.6	1.67022	2.21046	0.791809	0.107224	0.14846	-2.16097	1.16296	-0.952644
2.65	-0.160835	0.684586	-2.25995	1.6331	1.67434	-0.635094	2.07849	-1.25782
2.7	-2.90742	-1.75682	1.09699	1.6331	1.97951	-2.16097	-2.19397	-0.037117
2.75	-1.68671	-0.230942	-2.25995	1.32793	-0.767067	-1.24544	-0.362915	3.62499
2.8	0.754692	1.90529	-2.56513	4.37968	-1.07224	0.280434	3.90955	1.18359
2.85	1.36504	-2.062	1.70734	1.6331	0.453636	-1.55062	-0.668091	-0.952644
2.9	0.144341	-0.230942	-2.25995	0.107224	1.97951	2.72184	0.552612	-0.342293
2.95	-0.771187	2.21046	-1.34442	4.68486	-1.37742	-1.24544	2.99402	-0.037117
3	0.144341	-0.230942	-0.123718	0.107224	-2.29295	2.11149	-0.362915	2.40429
3.05	1.9754	-1.14647	-0.428894	-0.808304	-0.461891	0.280434	-0.668091	1.18359
3.1	1.9754	1.90529	2.31769	2.54863	1.06399	-0.940269	2.07849	-1.86817
3.15	-1.38154	0.989761	0.486633	-1.11348	-1.68259	2.41666	-0.362915	-1.563
3.2	-1.99189	-2.67235	-0.123718	-1.72383	-1.98777	-1.55062	-1.58362	-2.17335
3.25	-1.68671	-0.841293	2.31769	1.93828	-1.07224	0.280434	0.857788	-1.86817
3.3	0.449516	0.684586	-0.73407	-1.41865	1.36916	-1.55062	0.857788	0.268059
3.35	0.449516	-1.14647	-1.34442	-1.11348	-2.29295	-2.46615	-1.88879	-3.39405
3.4	-1.68671	-1.14647	1.70734	3.15898	-2.29295	1.50114	-0.668091	-4.91993
3.45	-1.68671	1.29494	-2.56513	-0.808304	-1.68259	-2.16097	2.38367	-4.0044
3.5	1.05987	-0.536118	-1.95477	-1.11348	1.36916	-2.16097	-0.973267	-3.08887
3.55	1.9754	-1.14647	2.01251	2.85381	-1.68259	0.890785	-0.668091	-0.342293
3.6	0.449516	0.989761	-2.8703	-1.11348	-3.20847	-0.940269	2.68884	-0.647469
3.65	-0.160835	3.12599	-2.25995	-0.503128	-1.68259	0.890785	1.77331	-2.7837
3.7	3.1961	-0.841293	1.40216	1.6331	1.67434	-0.635094	-0.057739	-3.08887
3.75	1.05987	-0.536118	-1.6496	-2.02901	0.758812	-1.55062	1.46814	-1.563
3.8	0.754692	1.90529	-1.95477	-1.11348	-1.37742	1.50114	2.99402	0.268059
3.85	3.1961	1.60011	2.92804	1.6331	-1.68259	-0.024742	-0.362915	1.48876
3.9	-0.771187	-2.67235	-0.428894	-1.11348	-0.156715	-0.940269	0.247437	0.87841
3.95	0.144341	-2.062	-0.123718	-1.11348	-0.156715	3.63737	2.07849	-1.25782
4	3.50127	1.60011	3.23321	1.93828	-2.59812	-0.329918	0.247437	-2.17335
4.05	-1.07636	-0.536118	-1.6496	0.717575	-3.20847	0.890785	-1.58362	-2.17335
4.1	2.28057	-1.75682	-0.73407	-0.503128	1.06399	4.5529	0.552612	-2.17335
4.15	-1.07636	0.074234	2.62286	-0.197952	-3.51365	1.19596	1.46814	-0.647469
4.2	0.144341	3.73634	-0.73407	1.32793	-2.9033	1.80631	-0.973267	0.573235
4.25	0.754692	1.29494	-0.73407	-0.808304	0.453636	6.07877	-1.27844	-2.47852
4.3	-1.07636	0.684586	2.31769	1.6331	-3.51365	3.02702	0.552612	-4.0044
4.35	2.28057	1.29494	0.181458	3.46416	0.14846	2.72184	0.857788	-2.17335
4.4	-1.07636	3.12599	-0.73407	1.32793	0.453636	5.46842	-2.19397	0.268059
4.45	3.50127	-1.14647	1.09699	1.93828	-1.98777	1.19596	-2.19397	0.87841
4.5	-0.771187	-1.45165	-0.428894	5.29521	1.67434	1.19596	2.38367	-2.47852
4.55	3.1961	0.074234	-1.03925	1.6331	-2.29295	3.33219	-1.27844	-0.647469
4.6	-1.38154	3.12599	0.181458	0.717575	0.453636	-0.329918	-2.49915	2.40429
4.65	1.36504	-0.536118	1.09699	1.02275	-1.98777	-0.024742	-0.973267	2.40429
4.7	-0.160835	-0.230942	-1.95477	3.15898	-1.07224	2.11149	1.77331	1.18359
4.75	1.05987	0.37941	-0.73407	-1.11348	-1.98777	-0.024742	-0.668091	3.31982
4.8	1.9754	2.51564	2.31769	0.412399	-2.59812	-1.8558	-0.668091	3.31982
4.85	-0.771187	-0.536118	-2.8703	3.46416	-0.461891	-0.024742	-0.973267	1.79394
4.9	2.28057	-1.14647	-1.95477	0.107224	-1.98777	-0.024742	2.38367	3.93017
4.95	-1.99189	-0.841293	2.01251	-0.808304	0.758812	-3.38168	-0.668091	0.573235
5	1.9754	0.989761	-0.123718	1.6331	-0.767067	-3.0765	-1.58362	-0.037117
5.05	-2.29707	-1.75682	-2.25995	1.93828	2.89504	-0.940269	0.247437	3.93017
5.1	-0.771187	-3.58787	0.181458	-0.808304	-0.767067	-3.99203	2.99402	-0.952644
5.15	-1.99189	-2.67235	3.23321	-0.197952	2.28469	-3.38168	-0.057739	2.70946
5.2	-1.99189	0.074234	-0.428894	1.32793	-0.461891	-0.635094	-0.057739	-0.952644
5.25	0.449516	-0.230942	-0.123718	-1.41865	2.89504	-2.16097	-0.057739	-0.647469
5.3	-2.90742	-2.062	3.53839	-1.72383	-2.29295	-2.77132	2.68884	0.573235
5.35	0.754692	-2.062	2.01251	0.717575	2.28469	0.890785	-1.27844	-1.86817
5.4	-3.21259	0.074234	1.40216	-2.94453	-0.767067	0.585609	-1.27844	2.40429
5.45	-1.99189	1.29494	2.62286	-1.72383	2.58987	-1.55062	-0.973267	-2.47852
5.5	0.144341	-0.841293	3.53839	-1.41865	-1.68259	-0.940269	0.857788	-0.037117
5.55	-3.51777	-1.14647	0.181458	-2.63936	1.36916	2.72184	0.247437	-2.47852
5.6	-1.07636	-0.536118	1.40216	1.6331	-0.461891	-0.329918	-0.973267	-2.47852
5.65	-1.38154	1.29494	4.75909	-3.24971	0.14846	-2.46615	-1.27844	-0.342293
5.7	-1.99189	0.074234	2.01251	1.02275	0.14846	-0.635094	0.857788	-3.39405
5.75	0.754692	-1.45165	1.09699	-1.72383	-0.767067	1.50114	2.68884	1.18359
5.8	-2.60224	-1.45165	1.70734	-0.197952	2.89504	-2.77132	-0.057739	-3.08887
5.85	-0.466011	1.29494	4.75909	-2.02901	-0.156715	-2.46615	-0.057739	-0.647469
5.9	0.449516	-2.97752	-0.123718	1.02275	2.58987	-0.329918	1.16296	0.573235
5.95	-1.38154	-2.36717	0.181458	-1.41865	-0.767067	0.280434	3.90955	-1.25782
6	1.05987	-0.841293	1.40216	1.02275	-0.156715	-3.99203	2.07849	2.70946
6.05	1.05987	-3.89305	3.53839	0.107224	0.453636	-2.77132	-0.668091	-1.25782
6.1	0.449516	-1.45165	-0.428894	5.29521	-0.767067	-0.329918	0.857788	-0.342293
6.15	2.89092	-2.062	1.40216	3.15898	1.67434	-0.024742	2.99402	1.48876
6.2	-0.160835	-3.58787	3.84357	8.34697	-2.59812	-3.0765	5.43543	-0.952644
6.25	0.754692	0.37941	5.06427	3.46416	-1.37742	-2.16097	2.68884	1.48876
6.3	3.50127	-2.67235	1.70734	8.95732	-0.767067	0.585609	1.16296	0.573235
6.35	-1.07636	0.989761	2.01251	3.15898	-2.9033	-1.24544	1.77331	-0.342293
6.4	-0.160835	-2.97752	3.84357	4.37968	1.67434	-2.16097	2.99402	2.70946
6.45	1.67022	-1.14647	4.45392	1.02275	-0.156715	-3.38168	3.29919	0.268059
6.5	-1.68671	-2.062	0.791809	2.24345	0.14846	-0.024742	-0.973267	-0.952644
6.55	1.05987	-1.45165	0.791809	1.02275	0.758812	-1.24544	-0.057739	3.01464
6.6	0.449516	-1.14647	1.40216	-0.503128	-1.07224	-3.68685	-0.057739	-1.25782
6.65	-1.38154	-2.67235	2.01251	0.412399	3.81057	-2.46615	1.77331	-0.952644
6.7	0.754692	-0.230942	0.181458	-1.41865	-0.461891	0.280434	1.16296	2.09911
6.75	0.449516	-1.75682	-0.428894	0.412399	0.14846	-0.635094	-0.057739	-2.47852
6.8	-1.38154	1.60011	1.40216	-1.11348	1.36916	-1.8558	-0.057739	-2.7837
6.85	1.67022	-1.75682	3.23321	0.107224	-0.461891	-0.635094	0.857788	0.573235
6.9	-1.38154	1.60011	0.486633	-2.02901	2.28469	1.80631	1.77331	-3.08887
6.95	-2.90742	-1.45165	-1.6496	0.717575	0.14846	1.19596	2.99402	-2.17335
7	-0.466011	2.21046	-0.428894	-2.02901	-0.156715	-0.635094	0.552612	1.18359
7.05	-3.51777	-1.75682	2.01251	-0.503128	4.11575	-0.329918	-0.362915	-2.47852
7.1	-2.29707	2.82082	-1.6496	-1.41865	-0.767067	2.41666	-0.362915	-2.7837
7.15	0.754692	-1.45165	-2.25995	0.107224	0.758812	2.41666	0.552612	1.48876
7.2	-1.07636	2.21046	-2.25995	-2.02901	1.36916	-0.635094	2.07849	-3.69923
7.25	-1.68671	-2.67235	1.09699	-1.72383	-1.07224	-0.329918	-0.668091	-3.39405
7.3	2.28057	0.074234	0.486633	-2.33418	1.06399	0.280434	-2.19397	0.87841
7.35	0.754692	-1.75682	-1.95477	-1.72383	0.758812	2.11149	-2.49915	-3.69923
7.4	-1.07636	-0.230942	-1.03925	-0.197952	-1.37742	-1.24544	-0.057739	-4.0044
7.45	1.9754	0.989761	-0.123718	-2.02901	3.20022	-1.55062	-1.58362	-0.647469
7.5	-0.466011	-0.230942	2.01251	2.24345	-1.68259	-2.16097	-2.19397	-1.86817
7.55	-0.771187	2.51564	-1.34442	-0.808304	-0.156715	0.280434	-0.362915	-3.08887
7.6	1.05987	-0.536118	-2.25995	4.07451	2.58987	-0.024742	-0.362915	-0.647469
7.65	1.05987	1.90529	-1.95477	-0.808304	-0.767067	-1.24544	-1.58362	0.573235
7.7	-1.07636	-1.14647	0.486633	3.46416	1.36916	-1.8558	0.247437	-1.563
7.75	-0.466011	0.074234	1.40216	-0.503128	2.28469	-0.940269	-0.668091	0.268059
7.8	0.754692	0.989761	-2.56513	1.32793	-0.767067	2.11149	-1.88879	3.62499
7.85	-2.90742	-0.841293	-2.25995	0.107224	1.36916	0.280434	2.68884	-0.037117
7.9	-1.68671	2.21046	-1.6496	-0.197952	0.758812	-2.16097	-2.49915	0.87841
7.95	1.67022	-1.45165	0.791809	1.02275	-0.461891	-0.635094	0.247437	4.23534
8	-2.90742	0.989761	-0.428894	-1.11348	3.20022	1.19596	-0.057739	1.18359
8.05	-3.21259	0.989761	-1.95477	2.85381	-0.156715	3.33219	-0.668091	-0.037117
8.1	0.449516	-0.536118	-0.73407	-1.41865	-1.98777	-0.940269	2.68884	2.09911
8.15	-1.99189	3.43117	-1.34442	1.93828	1.67434	-0.635094	-0.057739	2.40429
8.2	-0.771187	-1.14647	1.09699	-0.808304	-1.68259	-1.24544	2.68884	0.573235
8.25	1.05987	0.989761	0.181458	0.107224	-2.59812	1.50114	-0.973267	0.87841
8.3	0.754692	0.074234	-1.6496	-0.197952	1.36916	2.41666	1.16296	3.93017
8.35	0.144341	-1.75682	-1.95477	-1.11348	-2.29295	-0.635094	-1.88879	-0.037117
8.4	2.28057	3.43117	-1.03925	2.85381	-2.9033	-1.8558	-0.057739	1.48876
8.45	3.80645	-2.062	1.09699	0.107224	0.14846	-1.24544	-0.973267	3.62499
8.5	-0.160835	-0.841293	1.70734	3.76933	-3.51365	0.280434	-0.973267	2.09911
8.55	-0.160835	0.684586	-1.03925	0.107224	-3.20847	1.19596	1.77331	0.87841
8.6	2.89092	-1.45165	-0.73407	1.02275	0.453636	-0.635094	-2.49915	2.09911
8.65	0.144341	1.60011	-1.03925	1.02275	-3.20847	-1.8558	1.77331	4.54052
8.7	-1.07636	-1.14647	0.181458	-0.808304	-3.51365	-0.635094	-1.58362	-0.037117
8.75	1.67022	-1.45165	3.23321	2.54863	1.67434	-0.635094	1.46814	0.87841
8.8	1.67022	2.21046	1.40216	-1.41865	-2.29295	2.41666	-3.41467	2.70946
8.85	0.144341	-1.14647	-1.03925	2.24345	-2.29295	1.50114	-1.58362	2.09911
8.9	-0.466011	1.29494	-0.123718	-0.808304	1.36916	-1.24544	-0.362915	-1.563
8.95	3.1961	0.684586	-0.428894	-0.808304	-0.767067	-0.329918	-1.27844	-2.17335
9	1.67022	-0.536118	1.09699	1.93828	-0.461891	-1.55062	1.77331	0.87841
9.05	0.449516	2.82082	2.62286	-0.503128	1.97951	0.585609	-1.27844	-0.342293
9.1	0.449516	0.074234	0.791809	2.54863	-0.156715	1.80631	1.77331	-2.47852
9.15	3.50127	-0.536118	-0.428894	-1.72383	-1.07224	-0.024742	-0.668091	-0.952644
9.2	-0.160835	4.04152	0.486633	-0.808304	1.97951	-1.55062	-1.58362	2.09911
9.25	-0.466011	-0.230942	0.181458	0.717575	2.89504	-0.940269	1.46814	-0.037117
9.3	0.449516	0.684586	2.01251	-1.41865	-0.156715	-0.329918	-3.1095	-0.952644
9.35	0.449516	1.60011	2.01251	2.54863	1.97951	0.890785	-0.668091	-0.342293
9.4	-3.21259	-2.062	-0.428894	-1.72383	3.81057	2.41666	-0.668091	2.40429
9.45	-2.60224	0.074234	-0.428894	-0.808304	0.453636	1.19596	-1.27844	-1.563
9.5	-1.38154	0.989761	0.791809	0.107224	0.453636	-0.635094	2.99402	-2.47852
9.55	-0.466011	-1.14647	1.09699	-1.41865	3.81057	-0.940269	0.247437	-0.952644
9.6	-2.29707	0.989761	-1.6496	2.85381	0.14846	-0.329918	0.857788	1.48876
9.65	-0.771187	0.37941	-1.03925	-2.02901	-0.461891	0.585609	3.60437	-1.25782
9.7	3.1961	-0.230942	2.01251	-0.197952	1.36916	1.80631	0.247437	-1.25782
9.75	0.754692	1.60011	-2.56513	0.412399	-1.07224	2.11149	0.857788	-0.647469
9.8	0.144341	-1.45165	-0.428894	-2.63936	-2.29295	-1.24544	2.68884	3.31982
9.85	0.144341	-2.67235	2.62286	1.02275	-1.37742	-1.55062	-1.58362	-0.342293
9.9	3.50127	0.989761	-1.34442	-2.94453	0.453636	-0.940269	2.07849	-1.25782
9.95	1.05987	-2.062	2.01251	-1.41865	-3.81882	0.585609	0.552612	-0.037117
10	-0.771187	-2.67235	-0.123718	-0.503128	-2.9033	2.41666	-0.668091	1.79394
10.05	-0.160835	1.60011	-0.123718	-2.33418	0.453636	0.280434	2.38367	-0.037117
10.1	1.67022	-1.14647	2.01251	1.93828	-1.68259	1.50114	-0.973267	-0.952644
10.15	-1.07636	-0.536118	-1.34442	0.412399	-2.9033	3.02702	-0.668091	-0.952644
10.2	-2.90742	3.73634	2.92804	-0.503128	-1.07224	5.16325	2.68884	1.48876
10.25	-0.466011	-0.230942	0.181458	3.76933	0.758812	1.50114	-1.27844	1.79394
10.3	1.05987	-0.841293	0.486633	0.412399	-1.37742	1.80631	-0.973267	-0.647469
10.35	0.754692	3.43117	1.70734	1.02275	-2.29295	4.5529	4.5199	-1.25782
10.4	-2.29707	-1.45165	1.40216	1.93828	2.28469	0.585609	-0.668091	-0.037117
10.45	-1.99189	-0.841293	5.36945	-1.72383	0.14846	-0.329918	0.552612	3.01464
10.5	0.449516	3.43117	2.01251	0.107224	-1.37742	2.11149	3.60437	-0.037117
10.55	1.67022	-0.230942	4.75909	-1.11348	-1.37742	-1.55062	-0.668091	-1.25782
10.6	-0.771187	-0.841293	1.09699	-1.72383	1.67434	0.585609	0.552612	-1.25782
10.65	-1.99189	2.82082	3.23321	2.24345	-0.767067	-1.55062	3.29919	0.87841
10.7	-0.160835	0.074234	3.84357	-3.24971	-0.767067	-1.55062	-0.973267	1.48876
10.75	3.1961	-0.536118	1.40216	-2.02901	0.453636	3.33219	0.247437	-2.17335
10.8	0.754692	2.82082	5.36945	0.717575	1.97951	-0.024742	3.29919	-1.563
10.85	-1.07636	1.29494	0.486633	-3.55489	-1.37742	2.41666	-0.362915	-0.647469
10.9	-0.160835	0.37941	2.92804	-1.72383	-1.37742	-0.940269	-0.362915	2.09911
10.95	1.05987	2.82082	0.486633	-1.72383	-0.156715	0.280434	2.07849	0.573235
11	2.58575	3.12599	-0.428894	-2.02901	0.14846	0.280434	-2.19397	-1.25782
11.05	-0.466011	-1.14647	2.01251	-0.503128	-3.20847	-1.8558	-1.27844	-0.037117
11.1	-0.466011	0.074234	-1.95477	-1.41865	-1.98777	1.80631	1.46814	1.79394
11.15	-0.160835	2.82082	-0.428894	-0.808304	-0.156715	-2.77132	-2.49915	5.15087
11.2	1.05987	-0.536118	-0.73407	1.32793	-0.156715	0.890785	-0.668091	1.79394
11.25	1.67022	-0.536118	-0.73407	-0.808304	-2.59812	-1.55062	2.07849	-0.952644
11.3	-0.466011	2.82082	2.62286	-1.41865	-1.68259	0.585609	-2.49915	-0.342293
11.35	-1.07636	0.684586	-0.73407	2.24345	1.36916	2.41666	-3.1095	-0.037117
11.4	-1.38154	0.074234	-0.123718	-0.808304	-0.461891	0.280434	0.552612	0.573235
11.45	1.05987	1.60011	3.84357	-0.808304	-2.59812	5.16325	-1.58362	0.268059
11.5	2.58575	0.989761	0.486633	3.46416	-2.59812	1.50114	-2.49915	-1.86817
11.55	-0.160835	-0.536118	1.09699	-0.197952	-1.68259	1.80631	0.552612	-1.563
11.6	-0.466011	-0.230942	4.75909	0.412399	-2.29295	4.24772	0.552612	-1.25782
11.65	-0.160835	2.51564	0.486633	4.37968	-5.3447	1.19596	-0.973267	0.268059
11.7	1.67022	-0.841293	1.70734	1.02275	-4.42918	2.11149	0.247437	1.48876
11.75	1.9754	-0.841293	3.84357	1.32793	-1.98777	0.280434	2.68884	-1.25782
11.8	-0.466011	2.82082	-0.123718	5.29521	-1.07224	-0.940269	-0.668091	-2.17335
11.85	-1.07636	1.60011	0.486633	2.24345	-3.81882	2.72184	-0.362915	-1.25782
11.9	1.05987	-0.841293	1.40216	1.32793	-2.59812	-2.46615	3.60437	0.268059
11.95	1.67022	0.074234	-0.73407	5.60039	-1.07224	-2.46615	-0.973267	3.01464
12	-1.07636	3.43117	0.181458	2.54863	0.453636	0.890785	-0.668091	0.87841
12.05	-0.771187	0.074234	1.40216	2.24345	-1.37742	-2.46615	0.857788	-0.952644
12.1	1.67022	-0.230942	-1.34442	4.68486	-2.9033	-1.55062	1.46814	-1.25782
12.15	-1.07636	1.60011	0.181458	2.24345	-2.59812	1.19596	-1.58362	-0.037117
12.2	-0.160835	1.60011	1.70734	1.93828	0.453636	-0.329918	-0.057739	1.18359
12.25	1.05987	-0.841293	-1.6496	3.46416	-1.98777	1.19596	4.21472	3.01464
12.3	-1.68671	-2.062	0.791809	2.54863	-3.81882	2.11149	0.552612	0.573235
12.35	2.89092	0.37941	2.62286	0.107224	-4.42918	-0.329918	1.16296	-2.17335
12.4	-1.07636	-0.841293	-1.6496	3.76933	-1.37742	0.890785	2.68884	-1.86817
12.45	0.144341	-2.36717	-0.123718	3.76933	-5.03953	2.11149	4.5199	-2.47852
12.5	0.449516	-1.45165	3.53839	1.32793	-5.03953	-1.8558	1.46814	-1.25782
12.55	-0.466011	1.29494	0.181458	1.32793	-1.37742	-0.635094	2.07849	1.79394
12.6	3.50127	-1.45165	1.40216	3.46416	-4.124	0.890785	5.7406	0.268059
12.65	-0.771187	-1.14647	4.45392	-0.503128	-3.81882	-1.55062	1.77331	-1.86817
12.7	2.58575	-0.230942	0.486633	0.107224	0.14846	-0.329918	2.38367	-1.563
12.75	-2.90742	2.82082	0.791809	4.07451	-2.59812	1.50114	3.60437	-0.037117
12.8	-0.160835	-0.536118	3.23321	1.02275	-0.461891	-1.24544	5.7406	2.40429
12.85	-2.29707	-0.841293	1.09699	0.717575	-1.68259	-0.024742	2.38367	-1.86817
12.9	-0.771187	0.684586	0.181458	1.93828	-1.98777	2.41666	1.77331	-0.952644
12.95	-1.07636	2.21046	1.09699	1.6331	0.453636	-0.940269	3.60437	1.79394
13	-1.68671	-1.75682	1.70734	-0.808304	-1.37742	-1.24544	2.38367	1.79394
13.05	0.754692	-0.841293	-1.34442	-0.503128	1.97951	3.33219	-0.362915	0.268059
13.1	-2.29707	1.29494	-0.123718	3.15898	-1.98777	-0.940269	0.552612	2.70946
13.15	0.754692	2.21046	2.92804	-0.503128	1.36916	-1.8558	2.99402	1.79394
13.2	-1.99189	-0.230942	0.181458	-1.11348	-2.59812	0.585609	1.77331	0.268059
13.25	2.89092	-0.536118	-0.428894	1.32793	1.97951	-1.24544	-0.973267	2.40429
13.3	-1.68671	0.989761	2.62286	0.412399	-3.20847	-1.55062	0.857788	-2.17335
13.35	0.144341	1.90529	1.09699	-1.72383	0.758812	0.280434	2.99402	-2.47852
13.4	-1.07636	-0.230942	-0.123718	-1.72383	-2.9033	0.585609	0.857788	-0.037117
13.45	-0.466011	-0.536118	0.791809	2.24345	-0.461891	-2.46615	-0.057739	-3.08887
13.5	-0.466011	-0.230942	1.70734	-2.02901	-3.81882	-0.024742	0.247437	-1.563
13.55	-2.29707	2.82082	-2.25995	-2.33418	-1.07224	3.33219	3.29919	-2.7837
13.6	1.36504	1.29494	-1.6496	1.32793	-2.9033	-0.940269	1.46814	-1.563
13.65	-1.68671	-0.536118	2.01251	-1.72383	-2.9033	-0.940269	-0.973267	0.87841
13.7	0.754692	-0.841293	-1.03925	-0.503128	-4.42918	2.11149	-0.362915	-1.25782
13.75	0.754692	1.60011	-1.95477	3.46416	-3.81882	0.890785	3.29919	3.31982
13.8	-0.466011	1.90529	0.181458	-0.808304	-2.29295	-1.55062	2.38367	0.573235
13.85	4.11163	-1.14647	2.01251	0.412399	-2.9033	-0.635094	-0.668091	2.40429
13.9	-0.771187	-0.536118	-1.03925	0.717575	-0.461891	1.80631	-0.057739	0.573235
13.95	0.144341	0.074234	-0.123718	-0.808304	-3.20847	-2.46615	1.77331	-0.037117
14	-0.160835	2.21046	2.62286	1.93828	1.67434	-2.16097	2.38367	3.31982
14.05	-2.29707	-0.536118	1.70734	-1.41865	-2.59812	0.585609	-1.27844	0.87841
14.1	1.67022	-1.45165	-1.03925	2.54863	1.67434	-0.329918	-0.362915	3.31982
14.15	-3.51777	-0.536118	0.791809	-1.41865	-1.07224	-2.16097	1.16296	0.573235
14.2	-1.99189	-0.841293	3.23321	1.02275	0.453636	-0.940269	3.29919	-0.952644
14.25	1.36504	-2.36717	0.791809	-2.63936	0.758812	1.80631	0.247437	2.09911
14.3	-1.07636	-0.536118	-0.428894	1.32793	0.14846	-2.16097	-1.58362	-0.647469
14.35	0.754692	0.074234	0.486633	-2.63936	3.50539	-1.8558	-0.668091	2.70946
14.4	-0.160835	-2.36717	2.92804	1.32793	-1.07224	0.280434	0.247437	-0.342293
14.45	-1.07636	1.90529	0.791809	-3.55489	0.758812	1.80631	0.857788	-0.342293
14.5	1.9754	-2.062	-0.428894	2.24345	-0.767067	-2.16097	-2.49915	3.62499
14.55	-2.60224	-0.536118	1.09699	-1.72383	-2.29295	-0.940269	-1.27844	-1.25782
14.6	-1.99189	0.37941	3.23321	1.93828	1.67434	2.72184	0.552612	0.573235
14.65	0.449516	-1.75682	0.181458	-2.02901	-2.29295	1.19596	2.07849	3.62499
14.7	-1.99189	3.43117	-0.123718	0.717575	0.14846	-0.635094	-0.362915	-0.037117
14.75	-0.160835	-1.45165	2.62286	-1.72383	-2.29295	1.19596	-1.58362	1.18359
14.8	2.28057	3.12599	4.14874	-0.503128	-2.9033	4.5529	0.552612	1.18359
14.85	-1.38154	-0.841293	0.791809	-1.41865	1.36916	-0.329918	2.07849	0.573235
14.9	1.9754	1.29494	1.70734	-1.41865	-1.68259	-1.24544	3.60437	3.31982
14.95	2.58575	-0.230942	2.62286	0.717575	0.453636	-0.635094	-0.057739	0.87841
15	-0.160835	1.29494	4.45392	-0.197952	-0.767067	1.80631	-2.19397	-0.952644
15.05	1.9754	0.074234	1.40216	1.93828	-1.37742	1.9754	-3.71985	-0.952644
15.1	0.449516	0.37941	1.40216	0.107224	2.28469	0.449516	-5.5509	-4.61475
15.15	-1.07636	0.074234	1.09699	3.76933	-3.20847	-1.07636	5.7406	2.70946
15.2	1.05987	0.37941	3.53839	-0.808304	-3.81882	1.05987	2.38367	-0.342293
15.25	-1.07636	-0.230942	0.486633	1.32793	-6.87058	-1.07636	1.77331	-0.342293
15.3	-0.466011	-1.45165	-1.6496	-1.99189	-4.42918	-0.466011	3.60437	3.62499
15.35	3.1961	0.074234	-1.95477	2.89092	-3.81882	3.1961	2.38367	-1.25782
15.4	-0.771187	-1.14647	-1.07636	-1.68671	-2.29295	-0.771187	-0.362915	0.573235
15.45	-1.38154	0.37941	-0.771187	0.144341	-2.9033	-1.38154	0.552612	3.62499
15.5	2.58575	-1.45165	1.9754	-1.07636	-0.461891	2.58575	2.99402	-0.037117
15.55	-1.38154	2.82082	1.36504	-0.466011	-3.20847	-1.38154	1.77331	1.18359
15.6	-2.60224	-1.75682	-1.07636	-0.466011	1.67434	-2.60224	-0.973267	1.18359
15.65	0.449516	3.12599	1.36504	-2.29707	-2.59812	0.449516	0.857788	0.573235
15.7	-1.99189	-2.97752	4.11163	1.36504	1.67434	-1.99189	2.99402	3.31982
15.75	-1.68671	-1.14647	-0.160835	-1.68671	-1.07224	-1.68671	0.857788	0.87841
15.8	1.05987	-1.07636	1.05987	0.754692	0.453636	1.05987	-0.057739	-0.952644
15.85	-1.38154	-0.771187	3.80645	0.754692	0.758812	-1.38154	0.247437	-0.952644
15.9	-2.29707	1.9754	3.50127	-0.466011	0.14846	-2.29707	3.29919	-1.8558
15.95	0.449516	1.36504	-0.160835	4.11163	3.50539	0.449516	1.46814	0.280434
16	-1.99189	-1.07636	0.449516	-0.771187	-1.07224	-1.99189	-0.973267	1.80631
16.05	-2.29707	1.36504	2.89092	0.144341	0.758812	-2.29707	-0.362915	-2.16097
16.1	-0.466011	4.11163	-1.07636	-0.160835	-0.767067	-0.466011	3.29919	-0.940269
16.15	-0.771187	-0.160835	-1.38154	-2.29707	-2.29295	2.58575	2.38367	2.72184
16.2	-2.29707	1.05987	0.144341	1.67022	1.67434	-1.38154	-0.668091	1.19596
16.25	-1.07636	3.80645	1.05987	-3.51777	-2.29295	-2.60224	-0.057739	-0.635094
16.3	0.449516	3.50127	-1.99189	-1.99189	0.14846	0.449516	1.77331	1.19596
16.35	-1.99189	-0.160835	-1.68671	1.36504	-2.29295	-1.99189	2.38367	4.5529
16.4	-0.771187	0.449516	1.9754	-1.07636	-2.9033	-1.68671	5.7406	-0.329918
16.45	0.449516	2.89092	0.754692	-1.99189	1.36916	1.05987	2.38367	-1.24544
16.5	-2.90742	-1.07636	-1.07636	2.89092	-1.68259	-1.38154	1.77331	-0.635094
16.55	-1.68671	-1.38154	-1.07636	-1.68671	0.453636	-2.29707	3.60437	1.80631
16.6	0.754692	0.144341	1.9754	0.144341	-0.767067	0.449516	2.38367	1.9754
16.65	-1.99189	1.05987	-0.771187	-1.07636	-1.37742	-1.99189	-0.362915	2.89092
16.7	-1.99189	-1.99189	-2.29707	-0.466011	2.28469	-2.29707	0.552612	-1.68671
16.75	-0.160835	-1.68671	-0.771187	-0.466011	-3.20847	-0.466011	2.99402	0.144341
16.8	-0.160835	1.9754	1.67022	-2.29707	-3.81882	1.9754	1.77331	-1.07636
16.85	-2.29707	0.754692	-1.38154	1.36504	-1.68671	0.754692	-0.973267	-0.466011
16.9	-1.38154	-1.07636	-1.99189	-1.68671	-1.68671	-1.07636	0.857788	-0.466011
16.95	2.28057	-1.07636	-0.771187	0.754692	-0.466011	-1.07636	2.99402	-2.29707
17	-1.38154	1.9754	1.05987	0.754692	1.67022	1.9754	0.857788	2.89092
17.05	-1.38154	-0.771187	-1.99189	-0.466011	0.754692	-0.771187	-0.057739	-1.68671
17.1	1.36504	-2.29707	-2.29707	4.11163	-1.38154	-2.29707	0.247437	0.144341
17.15	-0.771187	-0.771187	-1.07636	-0.771187	-1.07636	-0.771187	3.29919	-1.07636
17.2	0.144341	1.67022	1.05987	0.144341	0.754692	1.67022	1.46814	-0.466011
17.25	1.05987	-1.38154	-1.68671	-0.160835	-5.75469	-1.38154	-0.973267	-0.466011
17.3	2.89092	-1.99189	-1.68671	-2.29707	-7.46601	-1.99189	-0.362915	-2.29707
17.35	-0.771187	-0.771187	-0.466011	1.67022	-8.11163	-0.771187	3.29919	-146.216
17.4	-0.160835	1.05987	1.67022	-3.51777	-10.653	-10.0599	2.38367	-149.573
17.45	1.05987	-1.99189	0.754692	-1.99189	-10.1443	-10.9919	-0.668091	-151.404
17.5	-0.160835	-2.29707	-1.38154	1.36504	-20.1608	-20.2971	-30.0577	-159.644
17.55	-2.29707	-1.07636	-1.07636	-1.07636	-20.2971	-70.0764	-40.9856	-164.222
17.6	-1.38154	1.05987	1.67022	-1.99189	-30.6702	-93.1034	-50.3837	-167.884
17.65	2.28057	-1.68671	1.67022	2.89092	-56.9194	-92.7982	-191.403	-171.546
17.7	-1.68671	-1.68671	-1.68671	-1.68671	-53.2573	-96.1551	-194.455	-181.006
17.75	-0.466011	-0.466011	-0.466011	0.144341	-56.6142	-100.428	-202.084	-188.636
17.8	0.144341	1.67022	-0.160835	-1.07636	-54.7832	-103.174	-204.831	-194.129
17.85	2.89092	0.754692	1.67022	-0.466011	-52.9521	-104.7	-212.46	-199.317
17.9	-0.466011	-1.38154	-0.160835	-0.466011	-54.7832	-106.226	-218.564	-209.693
17.95	0.754692	-1.07636	-2.90742	-2.29707	-56.6142	-106.531	-220.089	-218.543
18	1.67022	1.67022	-1.68671	1.36504	-54.7832	-112.635	-229.55	-223.731
18.05	3.50127	1.67022	0.754692	-1.68671	-54.7832	-116.907	-234.128	-227.393
18.1	1.67022	-1.68671	1.36504	0.754692	-59.3608	-119.348	-235.043	-238.074
18.15	0.449516	-0.466011	0.144341	0.754692	-61.497	-122.095	-244.198	-246.009
18.2	2.28057	-0.160835	-0.771187	-0.466011	-58.1401	-124.536	-246.029	-252.723
18.25	2.89092	1.67022	0.144341	4.11163	-61.497	-125.452	-248.166	-256.385
18.3	-1.38154	-0.160835	1.9754	-0.771187	-63.3281	-130.335	-253.964	-263.404
18.35	-1.38154	-2.90742	1.9754	0.144341	-63.0229	-136.133	-253.354	-271.033
18.4	0.144341	-1.68671	-1.38154	-0.160835	-63.0229	-139.795	-254.574	-274.085
18.45	0.754692	0.754692	-1.99189	-2.29707	-67.2954	-140.711	-258.847	-274.39
18.5	-2.90742	1.36504	-1.68671	1.67022	-67.2954	-145.594	-259.152	-274.085
18.55	-2.60224	0.144341	0.449516	-3.51777	-66.0747	-149.866	-259.152	-278.357
18.6	-2.29707	-0.771187	0.449516	-1.99189	-69.4316	-151.697	-261.593	-280.188
18.65	-0.771187	0.144341	-1.68671	1.36504	-70.3471	-151.392	-260.983	-280.188
18.7	-3.51777	1.9754	-1.68671	-1.07636	-69.1264	-155.97	-262.204	-278.663
18.75	-4.12812	1.9754	1.05987	-2.63936	-69.1264	-154.749	-264.035	-282.935
18.8	-2.29707	-1.38154	1.9754	0.412399	-73.0937	-152.918	-261.899	-286.292
18.85	-0.160835	-1.99189	-4.39618	-2.33418	-70.9575	-156.58	-264.035	-287.513
18.9	-1.38154	-1.68671	-3.17548	-3.24971	-68.2109	-153.528	-266.781	-288.428
18.95	-2.29707	0.449516	-1.6496	1.6331	-70.042	-155.664	-267.392	-288.733
19	-1.68671	0.449516	-2.8703	-1.72383	-72.1782	-156.58	-269.833	-293.921
19.05	1.05987	-1.68671	1.40216	-0.503128	-69.7368	-154.749	-274.106	-296.058
19.1	-0.771187	-1.68671	-2.56513	2.24345	-67.9057	-159.937	-275.021	-297.583
19.15	-1.68671	1.05987	0.486633	-0.808304	-71.2627	-158.106	-275.937	-298.499
19.2	-2.29707	1.9754	-2.56513	1.6331	-72.4834	-162.378	-279.904	-297.583
19.25	-0.771187	-2.062	-1.95477	1.02275	-70.9575	-163.599	-279.294	-301.856
19.3	-1.07636	-0.841293	0.791809	-0.503128	-68.8213	-161.463	-278.683	-303.382
19.35	-4.4333	3.73634	-2.8703	1.32793	-72.7886	-165.43	-282.345	-303.992
19.4	-4.4333	0.684586	0.181458	-0.503128	-72.7886	-162.683	-281.43	-303.992
19.45	-3.21259	0.684586	-2.56513	-2.02901	-71.873	-168.177	-278.683	-301.856
19.5	-0.466011	4.65187	-3.17548	0.412399	-71.873	-168.482	-282.651	-304.603
19.55	-1.07636	2.51564	-0.73407	-1.11348	-75.8403	-169.092	-283.871	-306.739
19.6	-3.82294	1.29494	-4.39618	-2.33418	-76.7558	-170.923	-278.683	-307.959
19.65	-2.90742	2.21046	-2.25995	2.24345	-76.4507	-166.346	-281.125	-307.044
19.7	-1.38154	3.12599	-1.03925	-0.197952	-75.23	-170.923	-279.294	-305.823
19.75	0.449516	0.37941	-3.78583	-0.197952	-80.1128	-168.482	-275.937	-305.213
19.8	-1.68671	0.684586	-1.34442	4.99004	-82.8594	-169.092	-275.021	-307.654
19.85	-3.21259	3.12599	-1.95477	-0.808304	-81.9438	-169.702	-274.716	-306.128
19.9	-3.21259	-1.45165	-2.25995	-0.503128	-81.9438	-167.566	-272.58	-303.687
19.95	-1.07636	-0.841293	0.486633	2.54863	-86.8266	-171.534	-271.969	-301.856
20	0.449516	0.684586	-1.34442	-0.503128	-88.6577	-170.618	-276.242	-299.415
20.05	-2.90742	0.37941	-2.25995	0.107224	-88.6577	-169.092	-276.852	-301.551
20.1	-3.51777	-2.36717	2.62286	2.85381	-85.9111	-171.839	-273.8	-303.992
20.15	-2.29707	-1.75682	-1.34442	-1.72383	-89.8784	-169.092	-279.294	-304.908
20.2	1.05987	2.82082	-2.25995	-0.503128	-91.7095	-169.397	-280.514	-304.603
20.25	-1.38154	-1.14647	1.70734	2.85381	-90.7939	-169.702	-278.683	-304.297
20.3	-2.29707	-0.841293	-2.8703	-1.72383	-87.437	-168.177	-279.294	-303.077
20.35	0.754692	1.29494	-1.95477	-1.41865	-88.0473	-170.618	-283.871	-304.603
20.4	1.9754	0.989761	1.09699	2.54863	-92.625	-170.008	-284.482	-307.959
20.45	-1.68671	-0.841293	-2.8703	-0.808304	-91.7095	-166.651	-281.125	-307.959
20.5	-0.771187	-1.45165	-2.25995	-1.41865	-91.0991	-169.397	-285.092	-307.654
20.55	1.36504	2.82082	0.791809	0.717575	-89.268	-170.008	-286.618	-305.518
20.6	-1.99189	1.60011	-4.091	-0.808304	-92.9302	-165.125	-285.397	-303.382
20.65	1.05987	-0.230942	-4.39618	-2.33418	-93.2353	-168.787	-284.787	-303.992
20.7	-2.29707	0.989761	0.181458	-0.503128	-91.0991	-169.092	-287.228	-305.213
20.75	-1.68671	4.04152	-3.48065	-0.197952	-91.7095	-166.651	-287.228	-305.823
20.8	0.754692	0.989761	-4.091	-1.72383	-94.1509	-171.534	-283.871	-303.992
20.85	-2.29707	0.684586	-1.34442	1.02275	-92.9302	-172.449	-285.397	-303.687
20.9	1.67022	1.29494	-2.8703	2.54863	-92.9302	-171.228	-285.397	-302.466
20.95	-1.99189	3.73634	-2.8703	-0.808304	-94.456	-175.196	-283.871	-299.72
21	-0.160835	0.989761	-0.428894	-0.503128	-91.4043	-177.332	-280.514	-302.161
21.05	-2.60224	1.60011	-1.03925	2.24345	-96.2871	-176.722	-282.651	-302.161
21.1	-1.68671	2.51564	-1.95477	-0.808304	-96.2871	-178.858	-283.566	-300.33
21.15	-1.99189	4.65187	-0.123718	-0.808304	-94.1509	-181.604	-282.04	-296.668
21.2	-2.90742	0.074234	1.40216	1.6331	-96.8974	-179.773	-282.345	-297.889
21.25	-0.160835	0.989761	-3.17548	0.412399	-93.2353	-179.163	-286.313	-299.415
21.3	-2.60224	2.82082	-1.34442	-0.808304	-98.4233	-182.52	-287.228	-297.583
21.35	0.754692	3.43117	1.40216	0.412399	-93.2353	-181.91	-286.923	-297.278
21.4	-2.29707	0.074234	-3.17548	1.6331	-97.2026	-178.858	-287.533	-301.856
21.45	0.449516	-0.841293	-3.78583	-2.02901	-95.0664	-181.604	-291.195	-301.551
21.5	-3.21259	1.90529	-0.123718	-2.02901	-97.2026	-180.689	-291.195	-300.025
21.55	-1.68671	3.12599	-2.56513	1.02275	-94.7612	-176.416	-289.364	-302.771
21.6	-2.90742	2.21046	-2.56513	-2.02901	-95.9819	-178.858	-288.144	-299.415
21.65	-1.38154	2.51564	-1.03925	-1.41865	-94.456	-176.722	-289.975	-297.889
21.7	-1.38154	3.12599	-0.73407	0.412399	-95.3716	-174.28	-289.059	-298.804
21.75	-2.90742	4.95705	-2.25995	1.6331	-94.7612	-173.975	-286.007	-293.311
21.8	1.36504	3.43117	-1.03925	-0.808304	-94.7612	-174.89	-283.871	-295.447
21.85	-1.99189	1.90529	1.70734	-0.197952	-95.3716	-174.585	-286.618	-292.09
21.9	0.754692	1.90529	-1.34442	4.37968	-94.456	-171.228	-286.923	-292.701
21.95	-0.160835	4.04152	-0.428894	0.107224	-95.3716	-175.806	-286.923	-292.09
22	0.449516	4.3467	0.791809	0.412399	-92.3198	-175.806	-284.176	-288.428
22.05	3.50127	2.21046	0.181458	3.46416	-93.5405	-172.449	-289.67	-289.954
22.1	1.36504	2.51564	-1.95477	-0.808304	-90.1836	-173.059	-291.501	-286.902
22.15	2.89092	3.73634	-1.34442	1.02275	-94.1509	-173.67	-290.28	-290.87
22.2	1.67022	5.87257	3.23321	-0.197952	-89.268	-172.449	-287.228	-287.818
22.25	1.05987	2.82082	-0.73407	-0.197952	-92.9302	-168.482	-290.585	-287.818
22.3	4.4168	1.60011	-1.03925	3.76933	-90.4887	-171.228	-291.195	-289.649
22.35	-0.771187	2.21046	1.09699	-0.503128	-93.2353	-171.228	-289.059	-285.682
22.4	0.754692	5.26222	1.40216	3.15898	-91.7095	-169.397	-285.702	-291.175
22.45	-0.160835	2.82082	-1.6496	-0.808304	-90.7939	-169.092	-283.261	-288.123
22.5	-1.38154	2.82082	-1.34442	2.85381	-93.5405	-171.534	-284.787	-288.733
22.55	1.36504	4.04152	2.01251	-0.808304	-89.8784	-171.228	-282.04	-289.344
22.6	-2.29707	4.04152	1.40216	3.15898	-94.456	-169.397	-280.514	-285.987
22.65	-1.68671	1.60011	-1.03925	-2.02901	-90.7939	-172.144	-278.073	-289.344
22.7	1.36504	3.12599	-0.123718	2.85381	-93.2353	-173.059	-280.209	-285.987
22.75	-2.60224	1.90529	3.23321	-0.808304	-92.625	-172.449	-283.566	-287.208
22.8	-0.771187	-0.230942	1.09699	2.85381	-90.4887	-169.702	-284.482	-286.597
22.85	-0.160835	3.73634	0.181458	-0.808304	-93.8457	-173.059	-285.397	-282.325
22.9	-2.90742	-0.536118	0.791809	2.85381	-90.4887	-172.754	-285.092	-285.376
22.95	-0.771187	2.51564	3.84357	-0.197952	-95.6767	-170.008	-290.28	-285.376
23	-1.07636	-0.230942	0.486633	1.93828	-94.456	-166.956	-291.806	-283.24
23.05	-2.90742	0.074234	1.40216	0.412399	-92.625	-170.313	-291.501	-286.292
23.1	0.754692	0.684586	2.01251	0.717575	-95.9819	-169.397	-290.28	-285.376
23.15	-0.771187	0.684586	4.14874	1.6331	-93.5405	-167.261	-288.754	-284.156
23.2	-2.29707	2.82082	1.09699	0.107224	-97.5078	-164.82	-290.28	-286.902
23.25	1.67022	0.37941	0.791809	3.15898	-96.5923	-169.397	-290.89	-284.461
23.3	-3.21259	4.95705	2.31769	0.717575	-94.456	-169.092	-289.975	-282.935
23.35	-2.29707	1.90529	4.14874	4.68486	-98.4233	-167.566	-286.923	-285.376
23.4	-0.160835	6.48292	1.70734	1.32793	-96.2871	-168.177	-282.956	-282.325
23.45	-3.21259	1.29494	0.486633	3.76933	-98.4233	-173.365	-283.871	-282.02
23.5	-1.68671	5.26222	2.01251	0.717575	-98.4233	-174.89	-284.176	-282.02
23.55	2.58575	0.37941	3.23321	4.37968	-94.456	-173.059	-281.43	-279.883
23.6	-1.68671	4.65187	0.791809	0.107224	-98.1181	-171.839	-278.378	-279.883
23.65	-0.466011	-1.14647	-0.428894	3.15898	-95.6767	-174.89	-275.326	-282.63
23.7	4.4168	2.51564	-1.03925	-0.197952	-94.7612	-173.67	-276.547	-280.494
23.75	0.754692	-1.45165	0.791809	5.29521	-94.456	-171.839	-278.683	-279.578
23.8	1.05987	1.90529	1.40216	0.717575	-91.7095	-169.397	-277.157	-282.935
23.85	4.4168	-3.58787	-0.73407	3.76933	-93.5405	-171.839	-276.242	-281.104
23.9	0.144341	-0.536118	-0.73407	0.412399	-93.2353	-172.449	-275.326	-279.883
23.95	0.754692	-1.45165	0.181458	2.85381	-90.1836	-172.144	-276.242	-282.325
24	4.11163	-1.45165	1.70734	1.6331	-96.2871	-169.702	-278.683	-282.325
24.05	0.144341	0.074234	-0.428894	2.85381	-95.6767	-169.702	-277.157	-278.663
24.1	-0.466011	-1.45165	-1.34442	1.93828	-94.1509	-173.975	-274.411	-281.714
24.15	3.80645	3.73634	-1.03925	2.54863	-97.813	-173.365	-275.937	-280.188
24.2	0.449516	0.074234	1.70734	4.37968	-96.2871	-173.059	-277.157	-275
24.25	-0.160835	3.73634	1.40216	3.46416	-97.2026	-170.008	-274.716	-276.832
24.3	3.1961	0.074234	-0.428894	6.51591	-97.2026	-173.059	-272.58	-274.39
24.35	-0.466011	1.29494	0.791809	3.46416	-93.2353	-173.059	-275.021	-270.423
24.4	0.144341	1.90529	0.791809	8.04179	-96.5923	-171.839	-272.58	-272.559
24.45	1.9754	0.684586	3.53839	3.46416	-95.6767	-169.702	-273.495	-274.085
24.5	1.36504	3.43117	2.01251	6.51591	-92.3198	-168.482	-274.106	-273.169
24.55	0.144341	-0.230942	0.181458	3.15898	-95.3716	-170.618	-271.054	-272.559
24.6	1.67022	2.51564	-0.428894	4.68486	-94.456	-171.228	-273.495	-277.442
24.65	2.58575	0.989761	0.181458	3.76933	-91.0991	-170.618	-270.138	-276.526
24.7	0.144341	0.074234	2.01251	1.6331	-94.7612	-169.092	-270.443	-275.916
24.75	1.05987	3.73634	-0.428894	3.76933	-92.0146	-168.177	-269.223	-279.578
24.8	4.11163	-0.230942	-2.56513	1.02275	-88.6577	-170.008	-267.087	-277.747
24.85	-0.466011	1.29494	-1.95477	4.07451	-92.0146	-169.092	-268.612	-276.526
24.9	0.144341	0.074234	-0.428894	0.107224	-88.6577	-168.482	-263.73	-275.306
24.95	2.28057	-0.536118	2.92804	2.85381	-86.8266	-166.04	-267.087	-276.832
25	-0.466011	4.3467	0.486633	1.02275	-90.1836	-166.651	-261.899	-274.695
25.05	-1.38154	0.37941	-0.428894	2.54863	-89.5732	-168.787	-265.255	-272.254
25.1	0.144341	1.29494	-0.73407	5.29521	-89.268	-168.787	-260.678	-274.695
25.15	0.754692	1.29494	0.791809	2.85381	-91.7095	-169.702	-261.288	-273.78
25.2	-1.68671	0.989761	0.791809	6.82109	-91.0991	-167.566	-261.288	-271.644
25.25	-0.771187	4.04152	0.181458	2.54863	-90.7939	-166.651	-260.373	-271.644
25.3	2.89092	0.074234	-3.78583	5.29521	-94.456	-168.177	-263.424	-273.78
25.35	-1.38154	1.29494	-2.8703	2.54863	-92.3198	-170.313	-260.373	-271.033
25.4	-0.466011	3.12599	-1.34442	2.54863	-90.7939	-169.092	-266.476	-268.287
25.45	1.36504	1.29494	-0.73407	4.99004	-93.8457	-167.261	-262.814	-271.033
25.5	0.144341	3.43117	2.31769	1.93828	-92.9302	-165.735	-267.697	-269.812
25.55	-1.99189	2.21046	1.09699	4.68486	-91.0991	-167.566	-264.95	-267.066
25.6	-1.07636	0.989761	-0.123718	1.32793	-94.7612	-169.702	-264.34	-264.319
25.65	2.28057	4.65187	-1.03925	3.46416	-93.5405	-169.092	-264.34	-266.761
25.7	-1.99189	0.37941	-0.73407	4.07451	-92.625	-168.482	-257.931	-265.54
25.75	-3.21259	-0.230942	0.486633	2.24345	-96.2871	-166.956	-262.814	-263.709
25.8	-1.38154	2.82082	0.791809	6.51591	-95.6767	-165.43	-258.847	-263.099
25.85	-0.771187	-0.841293	-1.6496	2.54863	-92.0146	-166.04	-260.068	-265.845
25.9	-4.12812	0.074234	-4.39618	4.37968	-97.2026	-167.261	-260.678	-264.93
25.95	-3.82294	-0.536118	-2.56513	3.15898	-95.6767	-166.651	-257.321	-262.488
26	-0.771187	-2.36717	-1.95477	2.85381	-92.625	-165.735	-260.983	-263.404
26.05	-0.160835	0.989761	-0.123718	5.60039	-95.6767	-163.599	-259.457	-265.235
26.1	-2.60224	-0.536118	-1.34442	1.6331	-95.9819	-160.547	-258.847	-264.319
26.15	-0.160835	-1.14647	-2.56513	5.29521	-93.5405	-160.547	-260.373	-260.657
26.2	1.9754	1.90529	-0.428894	4.07451	-93.5405	-163.294	-257.931	-262.183
26.25	1.67022	-0.230942	2.62286	2.54863	-95.3716	-163.599	-260.983	-263.099
26.3	0.449516	-0.230942	-1.34442	6.82109	-93.2353	-163.294	-260.983	-263.709
26.35	0.449516	4.65187	-1.6496	3.15898	-91.0991	-162.378	-256.711	-262.183
26.4	3.1961	-0.230942	2.92804	3.76933	-92.9302	-162.683	-260.068	-262.488
26.45	1.67022	0.37941	-1.34442	3.46416	-91.4043	-160.852	-259.457	-265.54
26.5	0.144341	3.73634	-1.03925	1.32793	-87.437	-162.989	-255.185	-265.845
26.55	-0.771187	-0.230942	2.92804	5.60039	-89.268	-164.82	-257.626	-264.625
26.6	2.28057	0.684586	-1.6496	0.107224	-89.8784	-165.125	-256.1	-263.709
26.65	0.144341	3.43117	1.40216	1.32793	-88.0473	-164.82	-254.88	-266.761
26.7	-1.99189	-0.230942	-1.03925	3.46416	-87.7422	-162.989	-257.016	-267.371
26.75	-1.38154	1.29494	-1.6496	1.32793	-90.4887	-166.651	-255.185	-267.066
26.8	0.449516	2.82082	2.62286	4.07451	-90.1836	-167.566	-256.711	-264.93
26.85	0.754692	-1.14647	-1.34442	1.32793	-86.5215	-165.125	-259.457	-268.897
26.9	-1.99189	-0.230942	0.486633	1.6331	-88.9629	-164.209	-256.711	-269.812
26.95	-1.99189	2.21046	-3.48065	6.21074	-91.0991	-165.43	-259.152	-269.507
27	-0.160835	-2.062	-1.6496	2.24345	-88.3525	-163.294	-259.152	-267.066
27.05	1.05987	-0.841293	-1.6496	4.37968	-87.437	-160.852	-257.321	-268.592
27.1	-1.99189	3.12599	-3.48065	5.29521	-90.4887	-163.294	-259.762	-269.202
27.15	-1.07636	-0.230942	1.09699	4.07451	-90.1836	-160.547	-261.593	-268.897
27.2	0.144341	0.989761	-2.25995	6.51591	-86.2163	-160.852	-257.931	-265.54
27.25	1.9754	4.95705	1.70734	3.46416	-86.8266	-163.294	-260.983	-262.488
27.3	-0.160835	1.29494	-3.17548	2.85381	-88.9629	-159.632	-260.373	-263.404
27.35	-0.771187	2.51564	-3.17548	7.12627	-87.7422	-165.125	-256.405	-263.099
27.4	-0.466011	6.48292	-2.56513	2.85381	-84.3852	-164.82	-258.236	-262.183
27.45	2.89092	3.12599	-5.00653	1.6331	-87.7422	-166.651	-258.236	-258.216
27.5	1.9754	2.21046	-0.428894	5.29521	-87.1318	-168.787	-254.88	-256.995
27.55	0.144341	5.87257	-5.92206	1.32793	-85.6059	-164.209	-257.016	-260.047
27.6	-1.07636	3.43117	-1.6496	4.37968	-83.4697	-169.092	-256.1	-259.437
27.65	0.144341	2.21046	-1.6496	4.37968	-86.5215	-165.735	-252.133	-257.605
27.7	3.1961	4.3467	-2.8703	1.93828	-85.3008	-168.482	-254.574	-253.638
27.75	-0.466011	3.73634	1.40216	4.07451	-82.8594	-166.346	-253.964	-253.943
27.8	-2.60224	2.51564	-2.25995	3.15898	-81.6386	-165.735	-250.912	-256.08
27.85	-1.99189	2.51564	-1.03925	2.54863	-83.1645	-167.871	-250.607	-254.859
27.9	-0.466011	4.95705	-0.123718	4.99004	-82.8594	-163.904	-251.828	-252.417
27.95	1.67022	0.989761	-2.8703	3.46416	-80.4179	-167.871	-248.471	-249.061
28	-1.68671	1.90529	-0.73407	1.93828	-81.0283	-164.82	-245.724	-248.755
28.05	-1.99189	4.3467	-1.03925	4.68486	-82.8594	-166.651	-247.555	-249.366
28.1	-0.771187	1.29494	-1.03925	2.54863	-82.5542	-166.346	-245.419	-249.366
28.15	1.05987	2.21046	2.92804	1.32793	-81.9438	-160.852	-242.367	-248.145
28.2	3.1961	3.12599	-1.34442	5.29521	-80.7231	-163.904	-246.335	-247.84
28.25	0.754692	3.73634	-1.03925	2.24345	-84.3852	-161.158	-245.419	-246.924
28.3	-0.771187	0.37941	3.23321	0.412399	-82.8594	-162.073	-242.978	-249.061
28.35	-0.160835	0.989761	-1.95477	4.68486	-81.9438	-162.073	-248.166	-251.197
28.4	2.89092	3.73634	-0.73407	1.02275	-79.1972	-157.801	-249.386	-250.586
28.45	3.50127	-0.230942	2.31769	1.6331	-82.5542	-163.294	-248.471	-249.671
28.5	0.449516	-0.536118	-1.6496	3.15898	-83.1645	-163.599	-249.692	-247.229
28.55	1.05987	1.29494	-0.428894	1.02275	-82.8594	-160.547	-253.048	-247.229
28.6	1.67022	1.60011	2.01251	1.02275	-81.0283	-162.989	-251.217	-249.366
28.65	1.05987	0.074234	-1.6496	4.07451	-81.3335	-162.989	-248.471	-247.84
28.7	-1.38154	0.684586	0.486633	0.717575	-84.0801	-161.768	-251.217	-247.229
28.75	1.05987	4.65187	4.14874	1.02275	-82.249	-163.904	-250.912	-244.178
28.8	1.9754	0.684586	-0.123718	4.37968	-79.8076	-160.547	-246.64	-241.126
28.85	-1.68671	1.60011	1.09699	2.54863	-77.9765	-158.716	-248.166	-241.126
28.9	-0.466011	1.29494	5.67462	1.6331	-79.1972	-160.547	-249.386	-242.042
28.95	0.449516	2.21046	0.486633	3.46416	-78.2817	-158.411	-247.25	-241.126
29	-1.99189	-0.536118	1.40216	3.76933	-75.5351	-158.106	-244.809	-239.6
29.05	1.36504	-0.841293	4.45392	1.93828	-75.5351	-159.632	-248.471	-238.99
29.1	-2.60224	0.074234	0.791809	3.46416	-77.6714	-156.275	-246.945	-235.938
29.15	-0.160835	0.37941	0.181458	4.99004	-77.061	-156.275	-243.893	-235.022
29.2	0.144341	-1.75682	3.84357	1.02275	-74.9248	-157.495	-246.029	-237.159
29.25	-0.771187	-1.14647	0.181458	2.54863	-80.7231	-155.664	-248.776	-237.769
29.3	1.9754	1.90529	0.181458	6.21074	-79.1972	-154.749	-247.25	-237.769
29.35	-0.771187	-0.536118	3.23321	2.54863	-78.2817	-157.801	-244.504	-236.243
29.4	3.50127	-1.45165	0.181458	2.54863	-81.0283	-155.359	-248.471	-234.717
29.45	0.144341	-0.841293	-0.428894	5.29521	-80.1128	-154.749	-248.166	-236.854
29.5	4.11163	2.82082	0.791809	4.37968	-83.1645	-156.885	-246.64	-237.769
29.55	-0.160835	0.684586	1.09699	1.32793	-80.7231	-157.19	-244.504	-235.022
29.6	4.11163	-0.536118	-1.34442	3.46416	-81.6386	-154.749	-248.776	-231.971
29.65	-0.771187	0.684586	-1.03925	5.60039	-83.1645	-158.716	-247.25	-235.328
29.7	0.449516	4.65187	0.791809	1.93828	-79.5024	-157.801	-244.809	-233.497
29.75	-1.07636	1.29494	-2.8703	1.6331	-81.9438	-154.749	-244.809	-229.834
29.8	-0.160835	0.074234	-2.25995	4.68486	-75.8403	-159.327	-247.555	-232.276
29.85	1.05987	1.29494	0.791809	1.93828	-79.1972	-158.716	-246.64	-233.497
29.9	-1.99189	4.65187	-1.34442	1.32793	-75.8403	-155.664	-241.147	-230.14
29.95	1.67022	2.21046	-0.73407	2.54863	-79.8076	-157.801	-241.757	-235.328
30	-0.771187	-0.230942	1.09699	3.76933	-76.1455	-158.716	-243.588	-234.107
30.05	2.58575	0.37941	0.791809	0.717575	-79.8076	-157.19	-243.283	-230.75
30.1	-1.99189	2.51564	-1.34442	0.717575	-77.3662	-155.97	-239.01	-232.276
30.15	0.144341	1.90529	0.791809	4.37968	-81.0283	-159.021	-241.147	-228.309
30.2	-1.38154	-0.841293	3.53839	1.32793	-78.2817	-158.716	-242.978	-232.276
30.25	-1.07636	0.684586	-0.73407	-0.197952	-82.249	-156.58	-242.062	-230.14
30.3	2.28057	2.51564	-0.73407	3.15898	-80.1128	-160.242	-239.621	-230.14
30.35	-1.38154	3.12599	2.31769	1.6331	-81.9438	-160.242	-238.705	-231.36
30.4	1.9754	0.684586	1.70734	1.32793	-78.8921	-158.411	-240.841	-226.478
30.45	-1.07636	1.29494	-0.428894	4.68486	-79.1972	-158.106	-240.536	-232.581
30.5	-1.68671	1.29494	0.486633	1.6331	-78.2817	-158.106	-237.79	-229.529
30.55	1.36504	4.04152	2.92804	2.85381	-76.7558	-155.054	-237.179	-232.581
30.6	-1.68671	3.12599	-0.123718	2.85381	-77.9765	-152.002	-239.621	-231.666
30.65	0.754692	0.684586	0.791809	1.6331	-73.7041	-154.444	-239.316	-228.309
30.7	-0.160835	2.21046	0.791809	4.99004	-75.8403	-153.223	-237.484	-231.666
30.75	-1.68671	4.04152	2.62286	1.6331	-73.3989	-151.697	-235.043	-228.003
30.8	3.1961	1.60011	-0.428894	5.60039	-77.9765	-151.697	-239.01	-231.055
30.85	-0.466011	-0.230942	0.486633	1.6331	-75.23	-155.664	-240.841	-229.529
30.9	1.36504	1.29494	2.01251	6.51591	-77.061	-155.054	-240.841	-227.088
30.95	2.28057	2.21046	1.70734	1.93828	-78.2817	-152.918	-238.4	-230.14
31	-0.771187	-0.536118	-0.123718	5.90556	-74.6196	-155.97	-239.926	-227.393
31.05	2.89092	2.21046	0.486633	1.32793	-77.9765	-155.664	-242.367	-229.834
31.1	1.67022	1.90529	3.53839	5.90556	-75.23	-154.139	-241.757	-230.14
31.15	0.754692	0.684586	0.486633	1.93828	-78.8921	-149.866	-240.536	-226.783
31.2	4.72198	3.73634	0.181458	5.29521	-77.9765	-151.392	-236.874	-229.224
31.25	-0.160835	-0.230942	-0.428894	1.6331	-76.7558	-149.256	-239.01	-228.919
31.3	0.754692	4.3467	1.70734	3.76933	-78.2817	-146.509	-239.316	-224.952
31.35	2.58575	0.074234	-1.34442	2.24345	-75.23	-145.594	-238.705	-228.919
31.4	-1.07636	1.60011	-2.8703	3.15898	-79.1972	-147.119	-235.348	-226.478
31.45	1.05987	1.90529	-1.03925	4.07451	-77.061	-148.34	-231.991	-222.815
31.5	2.58575	1.90529	1.40216	3.15898	-75.5351	-146.509	-234.128	-226.478
31.55	0.754692	3.73634	-0.428894	5.90556	-78.5869	-149.561	-234.128	-226.172
31.6	1.67022	0.684586	-2.25995	4.68486	-74.0093	-152.613	-234.128	-225.257
31.65	1.67022	3.12599	-0.73407	8.65215	-76.1455	-152.613	-232.602	-227.393
31.7	0.144341	0.074234	2.62286	5.60039	-75.23	-148.951	-232.602	-225.867
31.75	3.80645	2.82082	-0.123718	8.95732	-72.4834	-149.866	-235.959	-224.036
31.8	-0.466011	0.074234	-1.03925	4.99004	-75.5351	-151.087	-236.569	-225.257
31.85	-1.68671	3.12599	-0.428894	8.04179	-74.6196	-149.866	-236.874	-222.51
31.9	2.89092	-0.230942	3.53839	3.15898	-75.8403	-146.814	-235.348	-219.153
31.95	-0.466011	3.43117	2.01251	7.12627	-76.1455	-145.288	-233.517	-220.679
32	0.144341	-1.14647	-0.428894	1.93828	-74.9248	-147.119	-234.738	-218.543
32.05	3.80645	2.51564	0.486633	4.99004	-76.7558	-146.509	-235.043	-214.271
32.1	1.67022	-1.14647	1.70734	0.717575	-75.23	-145.594	-234.433	-216.407
32.15	1.05987	1.60011	3.23321	5.60039	-72.7886	-143.763	-232.297	-214.271
32.2	5.02715	-2.062	-0.73407	1.02275	-75.8403	-146.204	-229.245	-212.134
32.25	1.67022	0.684586	-0.428894	4.99004	-73.0937	-147.425	-231.076	-214.271
32.3	0.754692	-2.062	-1.03925	1.93828	-73.3989	-147.425	-232.907	-212.745
32.35	5.6375	0.074234	1.09699	3.46416	-74.0093	-145.594	-231.991	-209.998
32.4	1.67022	0.684586	0.486633	2.85381	-70.6523	-148.34	-229.245	-212.134
32.45	0.754692	-1.45165	-1.95477	3.76933	-73.7041	-148.645	-229.855	-210.914
32.5	4.4168	1.60011	0.486633	3.15898	-70.9575	-148.645	-230.771	-207.862
32.55	1.05987	-1.14647	2.01251	2.24345	-67.9057	-146.204	-229.245	-207.862
32.6	0.754692	2.51564	4.75909	4.37968	-72.1782	-146.509	-227.414	-210.303
32.65	2.28057	-0.841293	1.09699	1.6331	-69.4316	-147.73	-229.55	-209.998
32.7	0.144341	-0.230942	0.791809	4.68486	-67.6006	-148.035	-227.109	-206.336
32.75	0.144341	0.989761	1.40216	1.93828	-68.8213	-145.288	-226.193	-209.693
32.8	1.9754	0.37941	2.62286	5.60039	-66.0747	-141.016	-226.803	-209.388
32.85	0.449516	5.26222	3.53839	0.412399	-66.685	-142.542	-221.615	-204.81
32.9	-1.68671	0.37941	-0.123718	2.24345	-69.1264	-142.542	-222.226	-207.557
32.95	0.754692	3.12599	-0.123718	0.412399	-66.3799	-141.321	-220.7	-207.557
33	0.754692	1.60011	-1.03925	1.32793	-69.7368	-137.659	-217.648	-206.031
33.05	-3.21259	0.989761	0.181458	3.15898	-70.6523	-137.049	-219.479	-204.2
33.1	-1.38154	4.65187	1.70734	0.717575	-67.9057	-139.795	-216.122	-207.862
33.15	0.144341	-0.841293	-1.6496	4.37968	-72.1782	-139.795	-220.7	-206.336
33.2	-1.99189	2.21046	-2.8703	0.412399	-70.9575	-141.016	-220.089	-203.589
33.25	-2.29707	2.51564	-1.6496	5.60039	-67.6006	-140.406	-222.226	-207.251
33.3	1.9754	-0.536118	0.791809	1.32793	-71.873	-140.711	-223.446	-208.167
33.35	-2.29707	1.60011	2.92804	4.07451	-71.873	-145.288	-221.921	-205.42
33.4	-1.38154	-1.45165	-0.123718	3.76933	-68.8213	-147.119	-225.888	-202.674
33.45	1.05987	-0.841293	-0.428894	3.15898	-74.0093	-145.899	-222.531	-206.946
33.5	0.449516	1.29494	0.486633	6.51591	-72.7886	-143.457	-225.277	-206.336
33.55	-2.29707	-1.75682	1.40216	1.6331	-67.6006	-143.152	-221.615	-202.063
33.6	-0.771187	0.37941	3.53839	5.60039	-71.5678	-143.763	-227.109	-205.115
33.65	1.9754	-0.841293	2.62286	2.54863	-70.042	-142.542	-224.362	-207.251
33.7	-2.60224	-1.75682	-0.428894	4.07451	-65.7695	-139.185	-224.972	-206.641
33.75	-1.38154	2.51564	1.09699	4.68486	-68.2109	-137.659	-226.803	-203.895
33.8	2.28057	-2.062	1.70734	3.76933	-66.685	-135.218	-224.667	-206.946
33.85	0.754692	0.074234	2.92804	8.34697	-61.497	-137.049	-228.024	-208.472
33.9	-1.38154	2.21046	4.75909	4.07451	-66.0747	-139.49	-224.057	-208.472
33.95	-0.466011	-1.45165	2.92804	6.82109	-64.854	-139.49	-226.498	-206.031
34	3.50127	1.60011	1.09699	4.68486	-60.8867	-139.49	-226.193	-209.998
34.05	0.144341	0.684586	0.486633	4.07451	-63.0229	-137.659	-223.141	-210.303
34.1	-0.466011	-0.536118	0.791809	6.21074	-64.5488	-137.964	-224.362	-209.388
34.15	1.67022	1.60011	2.31769	1.6331	-61.8022	-140.1	-219.784	-207.251
34.2	1.36504	-0.536118	2.92804	4.37968	-63.6333	-140.1	-223.141	-210.303
34.25	-0.160835	-0.536118	0.181458	2.85381	-64.5488	-139.185	-223.141	-209.388
34.3	0.144341	3.43117	-1.03925	2.54863	-64.854	-137.354	-219.784	-208.167
34.35	4.72198	-1.45165	-0.428894	4.68486	-64.5488	-135.828	-223.752	-205.115
34.4	1.05987	-0.230942	0.181458	0.717575	-67.2954	-135.218	-222.836	-207.557
34.45	1.36504	3.12599	1.70734	2.85381	-66.3799	-137.049	-222.836	-206.946
34.5	2.28057	-1.45165	-1.34442	1.6331	-65.1592	-137.659	-226.193	-206.031
34.55	4.11163	0.684586	0.181458	1.93828	-69.1264	-135.523	-224.667	-205.115
34.6	1.05987	1.90529	3.23321	4.99004	-67.2954	-136.744	-227.414	-207.557
34.65	0.754692	-0.536118	0.791809	1.32793	-63.3281	-135.218	-228.94	-206.946
34.7	1.05987	3.12599	0.791809	4.68486	-66.685	-134.607	-224.972	-206.336
34.75	1.9754	2.51564	2.92804	3.46416	-66.0747	-136.438	-229.245	-202.674
34.8	-1.07636	1.60011	1.40216	1.93828	-63.3281	-139.49	-228.329	-204.2
34.85	-1.07636	3.12599	2.01251	5.60039	-63.3281	-138.575	-225.277	-203.895
34.9	0.754692	2.21046	5.67462	1.93828	-66.0747	-137.049	-228.634	-203.589
34.95	1.67022	1.29494	1.70734	3.76933	-65.4643	-136.133	-225.583	-200.232
35	-1.68671	1.60011	3.23321	3.15898	-62.7178	-134.607	-221.615	-201.453
35.05	-0.466011	0.074234	2.62286	0.717575	-67.6006	-137.964	-225.277	-202.063
35.1	0.754692	-0.536118	-0.123718	6.21074	-66.0747	-136.744	-221.615	-200.538
35.15	1.36504	2.82082	3.23321	2.54863	-63.9385	-135.828	-218.258	-199.622
35.2	-1.68671	1.29494	-0.73407	2.85381	-64.854	-136.133	-221.31	-197.486
35.25	-0.466011	0.684586	2.31769	6.82109	-65.4643	-140.1	-220.089	-200.843
35.3	1.05987	4.3467	-0.73407	2.24345	-64.854	-139.185	-216.733	-201.453
35.35	2.89092	1.90529	-0.428894	4.99004	-62.4126	-136.744	-221.31	-201.453
35.4	-0.466011	0.37941	2.62286	4.07451	-65.1592	-139.795	-219.174	-198.401
35.45	-0.466011	0.989761	0.181458	3.76933	-64.2436	-138.575	-218.258	-198.707
35.5	1.05987	0.37941	4.14874	5.90556	-62.7178	-136.133	-221.615	-200.232
35.55	4.11163	-1.75682	-1.03925	3.46416	-63.0229	-137.964	-219.784	-199.927
35.6	1.67022	-0.230942	1.70734	3.76933	-66.0747	-135.218	-217.953	-199.927
35.65	-0.160835	0.684586	1.40216	6.82109	-66.0747	-136.438	-221.005	-196.265
35.7	0.144341	-2.36717	1.70734	2.85381	-63.0229	-136.438	-221.005	-199.317
35.75	3.50127	-0.536118	3.23321	4.07451	-64.2436	-131.861	-218.869	-201.453
35.8	0.449516	1.90529	1.40216	4.99004	-65.4643	-135.828	-224.057	-201.453
35.85	-1.38154	-1.14647	5.67462	2.54863	-64.854	-133.692	-224.057	-199.927
35.9	-0.771187	-0.536118	1.40216	4.07451	-60.8867	-134.302	-221.31	-195.96
35.95	0.144341	2.82082	1.70734	5.29521	-64.854	-132.776	-226.193	-198.401
36	1.9754	-0.230942	2.62286	2.54863	-65.1592	-129.724	-223.446	-200.232
36.05	-1.07636	-1.14647	1.70734	4.68486	-64.2436	-132.471	-220.395	-199.012
36.1	-1.38154	2.51564	4.45392	2.54863	-61.1919	-128.504	-223.141	-198.401
36.15	-0.466011	-0.230942	0.181458	2.54863	-64.2436	-132.471	-222.531	-195.044
36.2	0.144341	-0.536118	0.791809	4.99004	-64.2436	-132.166	-218.258	-197.791
36.25	0.754692	0.37941	2.92804	2.24345	-62.4126	-133.081	-220.7	-199.927
36.3	-1.68671	1.60011	-0.73407	2.24345	-59.666	-135.523	-222.836	-198.096
36.35	-1.68671	0.684586	1.09699	4.99004	-62.7178	-132.471	-221.615	-197.486
36.4	-0.160835	1.90529	-0.73407	1.02275	-63.0229	-137.049	-222.531	-196.57
36.45	3.1961	3.43117	-1.03925	1.6331	-61.8022	-135.218	-225.888	-193.519
36.5	1.9754	-0.230942	1.09699	4.37968	-59.0556	-135.218	-225.277	-195.655
36.55	-0.160835	0.37941	-2.56513	0.717575	-63.0229	-137.049	-222.836	-195.655
36.6	1.05987	3.43117	-3.17548	1.02275	-65.1592	-132.776	-226.803	-195.655
36.65	1.05987	0.37941	1.40216	5.60039	-64.5488	-135.523	-226.193	-195.655
36.7	3.50127	-0.841293	-2.8703	0.717575	-62.1074	-136.744	-221.921	-193.213
36.75	1.67022	-1.14647	-0.73407	1.93828	-65.1592	-131.25	-224.057	-194.129
36.8	-0.160835	2.21046	2.31769	4.37968	-66.0747	-135.218	-222.836	-195.655
36.85	-1.38154	-0.841293	-1.03925	1.02275	-63.9385	-133.387	-221.005	-195.655
36.9	0.449516	0.074234	-0.123718	0.717575	-59.666	-132.776	-217.953	-194.129
36.95	-0.466011	1.29494	4.14874	4.37968	-60.2763	-135.218	-222.531	-192.908
37	-2.60224	0.989761	-0.73407	0.412399	-62.1074	-134.302	-221.31	-190.772
37.05	-1.07636	0.074234	0.486633	-0.197952	-60.8867	-133.692	-217.648	-193.213
37.1	0.144341	-0.230942	3.23321	2.85381	-60.2763	-136.438	-219.784	-195.96
37.15	-1.99189	3.12599	-1.34442	-0.503128	-59.0556	-133.997	-221.005	-196.57
37.2	-0.160835	-0.841293	-0.428894	0.717575	-61.8022	-133.081	-219.174	-196.875
37.25	0.754692	-0.230942	2.31769	4.99004	-63.0229	-134.607	-216.427	-196.265
37.3	-1.07636	0.989761	-0.73407	1.6331	-61.8022	-132.776	-219.784	-194.434
37.35	2.58575	2.82082	-0.428894	1.02275	-60.5815	-132.166	-220.7	-194.739
37.4	-1.07636	0.684586	2.01251	2.85381	-64.854	-134.607	-217.038	-195.655
37.45	-0.771187	-0.230942	-0.73407	3.76933	-65.1592	-130.945	-218.258	-196.265
37.5	-0.160835	2.51564	0.791809	1.02275	-61.8022	-130.335	-218.869	-194.434
37.55	-1.99189	3.43117	5.9798	3.15898	-65.7695	-132.471	-217.343	-194.434
37.6	1.9754	0.074234	1.40216	3.46416	-66.685	-131.861	-214.291	-191.993
37.65	-0.771187	0.684586	0.486633	1.02275	-63.6333	-129.419	-216.427	-192.298
37.7	2.58575	2.21046	3.53839	1.32793	-68.2109	-133.387	-216.733	-194.739
37.75	-0.771187	1.29494	0.486633	4.68486	-65.1592	-133.692	-214.291	-195.044
37.8	1.9754	-1.75682	0.791809	1.02275	-66.685	-129.419	-212.155	-194.739
37.85	1.36504	-1.14647	2.01251	1.02275	-67.2954	-132.471	-215.512	-192.298
37.9	1.36504	0.989761	2.01251	3.46416	-62.7178	-130.64	-216.733	-195.35
37.95	0.449516	1.60011	0.181458	1.93828	-65.7695	-127.588	-215.512	-195.96
38	0.754692	-2.062	2.01251	0.412399	-60.5815	-127.893	-214.596	-194.129
38.05	1.9754	-1.14647	2.92804	2.24345	-64.2436	-126.368	-218.564	-191.077
38.1	-0.771187	1.90529	-0.123718	4.37968	-61.497	-123.926	-217.648	-193.213
38.15	1.67022	1.29494	0.486633	0.107224	-63.6333	-124.231	-216.122	-191.077
38.2	-1.68671	-0.841293	3.23321	-0.503128	-61.497	-126.062	-214.291	-187.11
38.25	2.28057	-1.45165	-1.34442	3.15898	-62.4126	-123.621	-217.038	-188.941
38.3	-3.21259	0.37941	-1.34442	1.02275	-63.0229	-120.874	-214.901	-185.889
38.35	-0.771187	2.21046	1.40216	-1.41865	-63.3281	-125.757	-213.376	-187.11
38.4	-1.99189	-0.841293	0.181458	0.717575	-63.9385	-124.842	-211.239	-187.11
38.45	-1.68671	-0.230942	-1.6496	3.15898	-62.4126	-122.705	-213.376	-182.837
38.5	1.05987	0.989761	0.486633	0.107224	-64.2436	-124.536	-213.681	-187.11
38.55	-1.07636	3.12599	3.23321	0.717575	-61.1919	-126.062	-211.85	-185.279
38.6	2.58575	0.074234	-0.123718	4.37968	-62.7178	-124.231	-210.019	-186.5
38.65	-0.466011	0.074234	-0.428894	1.02275	-59.9712	-123.011	-212.155	-185.889
38.7	0.144341	-0.230942	2.62286	1.93828	-63.9385	-126.978	-213.376	-182.837
38.75	1.05987	1.90529	-0.123718	5.90556	-59.666	-125.452	-211.545	-185.279
38.8	-2.29707	2.51564	-1.34442	1.32793	-61.8022	-123.011	-208.188	-181.006
38.85	0.449516	-0.841293	0.181458	4.07451	-57.8349	-125.452	-209.103	-184.974
38.9	-1.99189	-0.841293	2.92804	2.85381	-61.8022	-125.452	-210.934	-183.448
38.95	-2.60224	0.684586	-0.428894	1.6331	-57.5298	-124.536	-210.324	-183.753
39	1.05987	1.90529	0.486633	4.07451	-59.0556	-122.4	-208.188	-184.058
39.05	-2.29707	-1.14647	2.92804	1.32793	-58.1401	-126.062	-206.662	-180.091
39.1	-1.38154	-1.45165	1.70734	7.12627	-56.3091	-123.926	-209.103	-184.363
39.15	-1.99189	0.684586	-0.73407	2.85381	-58.4453	-123.621	-207.577	-181.312
39.2	-3.82294	1.60011	0.486633	7.43144	-53.8677	-123.926	-205.746	-182.227
39.25	1.67022	-1.14647	4.45392	2.85381	-59.0556	-127.283	-202.389	-182.227
39.3	-2.90742	1.29494	-0.428894	7.12627	-56.0039	-126.978	-202.084	-177.039
39.35	-1.38154	1.90529	-0.123718	3.15898	-57.8349	-124.231	-203.305	-181.312
39.4	1.67022	-1.45165	2.01251	6.51591	-58.1401	-126.062	-201.474	-178.26
39.45	-0.771187	1.90529	4.45392	2.24345	-54.1728	-127.588	-201.169	-176.429
39.5	0.449516	-0.230942	0.486633	5.29521	-57.8349	-125.757	-199.032	-177.039
39.55	1.9754	-0.536118	-0.123718	1.6331	-56.3091	-121.79	-200.863	-175.208
39.6	0.449516	0.684586	1.40216	4.99004	-57.8349	-124.536	-203	-176.429
39.65	1.67022	-1.45165	3.84357	2.24345	-57.8349	-126.673	-202.694	-175.513
39.7	0.449516	2.82082	0.181458	3.46416	-55.0884	-125.757	-203.61	-172.767
39.75	-1.07636	-1.45165	0.486633	2.24345	-59.666	-123.011	-202.389	-177.039
39.8	1.9754	1.90529	1.40216	2.85381	-57.8349	-125.757	-203.915	-177.649
39.85	-1.99189	-1.14647	4.14874	3.15898	-58.7505	-127.893	-205.746	-173.682
39.9	-2.60224	0.989761	1.09699	2.24345	-60.2763	-126.673	-206.051	-177.649
39.95	1.67022	-0.841293	0.486633	4.68486	-56.6142	-124.231	-203.61	-177.955
40	-3.82294	0.684586	1.09699	1.02275	-61.497	-127.588	-200.253	-173.682
40.05	-2.60224	-0.536118	3.23321	4.99004	-60.2763	-130.03	-199.643	-177.344
40.1	2.28057	1.29494	0.181458	1.6331	-59.3608	-128.809	-201.779	-175.818
40.15	-2.29707	0.989761	-1.03925	6.51591	-59.9712	-124.842	-202.084	-173.377
40.2	-1.99189	1.29494	0.181458	3.15898	-57.8349	-127.588	-199.338	-176.429
40.25	0.754692	0.989761	2.62286	5.60039	-59.3608	-129.724	-198.117	-175.818
40.3	-1.99189	0.37941	-1.34442	2.85381	-59.3608	-128.199	-198.117	-170.63
40.35	-0.771187	2.82082	-2.25995	7.12627	-54.478	-125.757	-200.863	-175.208
40.4	1.36504	-0.536118	-2.56513	4.37968	-59.0556	-125.452	-202.084	-175.208
40.45	-1.68671	1.29494	1.09699	6.51591	-56.6142	-127.588	-201.169	-172.461
40.5	-0.771187	-1.45165	0.791809	4.07451	-55.3935	-126.368	-199.032	-175.208
40.55	2.28057	3.12599	-1.95477	5.29521	-56.9194	-123.926	-196.591	-176.124
40.6	-2.29707	-1.14647	-1.34442	4.99004	-55.3935	-121.485	-198.422	-174.903
40.65	-1.99189	2.51564	0.486633	4.99004	-56.3091	-124.842	-198.422	-176.429
40.7	0.754692	-1.75682	2.01251	5.29521	-56.6142	-125.147	-197.201	-178.26
40.75	-2.90742	3.43117	-1.34442	2.85381	-52.6469	-123.316	-195.981	-177.039
40.8	-2.60224	-0.230942	-0.73407	5.60039	-56.6142	-119.348	-197.201	-176.124
40.85	0.754692	0.37941	-1.03925	3.46416	-56.0039	-119.348	-196.896	-179.48
40.9	-3.82294	2.21046	2.92804	5.29521	-51.1211	-122.095	-193.844	-177.039
40.95	-2.90742	0.37941	1.40216	3.15898	-55.3935	-121.485	-192.929	-173.987
41	0.754692	5.26222	-1.6496	5.60039	-53.8677	-119.043	-193.539	-178.87
41.05	-1.99189	1.29494	1.09699	1.32793	-51.4262	-116.297	-190.182	-177.039
41.1	-1.07636	3.43117	2.01251	2.54863	-55.3935	-118.128	-189.877	-172.156
41.15	1.05987	0.684586	4.45392	1.93828	-52.3418	-119.043	-191.098	-174.903
41.2	-0.160835	0.989761	1.40216	1.93828	-51.1211	-117.517	-186.52	-174.598
41.25	-1.68671	3.12599	0.486633	3.76933	-54.478	-115.686	-190.182	-172.461
41.3	-0.160835	-0.230942	0.791809	1.02275	-52.9521	-114.771	-189.267	-171.851
41.35	1.36504	2.82082	1.70734	4.37968	-54.1728	-116.907	-191.098	-173.987
41.4	-1.07636	-0.230942	3.53839	1.02275	-54.7832	-118.433	-192.624	-172.767
41.45	-1.07636	0.989761	-0.123718	4.07451	-53.5625	-117.212	-189.267	-170.936
41.5	1.36504	1.60011	-0.73407	2.24345	-54.478	-117.823	-193.539	-173.987
41.55	-1.99189	-0.536118	-0.428894	2.85381	-55.3935	-115.381	-188.962	-173.682
41.6	-0.771187	4.04152	0.791809	3.76933	-53.2573	-119.043	-193.539	-171.851
41.65	2.28057	0.37941	2.01251	2.24345	-55.6987	-120.264	-190.487	-173.377
41.7	1.36504	0.37941	0.791809	6.51591	-56.3091	-119.654	-191.708	-175.513
41.75	-0.466011	3.43117	-1.03925	2.24345	-53.8677	-120.264	-190.487	-175.208
41.8	1.05987	0.37941	-0.123718	4.68486	-56.6142	-117.823	-189.877	-171.241
41.85	2.58575	2.51564	0.486633	1.93828	-57.8349	-117.823	-190.487	-175.818
41.9	-2.29707	0.989761	2.31769	2.54863	-56.6142	-119.959	-186.825	-176.429
41.95	-1.68671	-0.536118	1.70734	3.46416	-57.5298	-119.959	-189.572	-174.292
42	1.9754	3.12599	-0.73407	1.6331	-58.7505	-118.738	-185.299	-173.072
42.05	-1.38154	0.37941	-1.6496	5.90556	-57.2246	-115.686	-188.656	-176.734
42.1	-2.29707	1.60011	-1.03925	1.93828	-57.5298	-114.466	-184.994	-174.598
42.15	-0.771187	4.65187	1.70734	4.07451	-59.0556	-116.602	-186.215	-172.767
42.2	0.144341	1.60011	3.23321	2.85381	-57.2246	-118.128	-186.52	-173.682
42.25	-2.90742	4.65187	0.181458	2.54863	-55.3935	-117.212	-184.384	-176.124
42.3	-2.60224	4.04152	-1.95477	5.60039	-59.666	-118.433	-185.605	-174.903
42.35	0.754692	1.60011	-1.34442	1.02275	-57.8349	-116.907	-183.468	-172.461
42.4	-0.771187	6.48292	-1.03925	3.15898	-55.3935	-115.992	-187.13	-173.987
42.45	-1.68671	2.21046	-0.428894	2.24345	-58.4453	-117.823	-186.825	-174.292
42.5	-0.771187	2.21046	1.70734	1.32793	-58.4453	-119.348	-183.468	-174.598
42.55	1.36504	4.65187	-0.123718	5.29521	-54.7832	-118.128	-187.741	-169.715
42.6	-1.99189	0.37941	-1.03925	1.02275	-56.9194	-117.823	-185.605	-172.156
42.65	-1.68671	2.21046	-0.73407	3.46416	-56.9194	-115.992	-188.351	-172.461
42.7	-0.771187	2.82082	0.791809	2.85381	-53.8677	-113.855	-190.487	-172.767
42.75	-0.160835	-0.230942	3.53839	2.54863	-56.0039	-114.466	-186.52	-169.41
42.8	-2.90742	0.989761	-0.73407	6.21074	-55.6987	-116.297	-190.487	-171.241
42.85	-1.38154	1.29494	-1.34442	1.93828	-54.478	-114.466	-191.098	-172.767
42.9	1.05987	0.074234	0.486633	3.15898	-53.8677	-114.16	-188.046	-172.461
42.95	0.754692	3.12599	0.486633	2.24345	-56.9194	-112.329	-192.318	-169.41
43	-2.29707	0.37941	-2.56513	0.107224	-55.0884	-111.414	-189.267	-170.936
43.05	-2.29707	1.29494	-1.03925	3.46416	-50.8159	-110.498	-191.098	-173.072
43.1	0.754692	5.26222	1.40216	-0.197952	-54.7832	-112.635	-191.403	-173.377
43.15	0.144341	1.29494	-1.34442	-0.197952	-54.1728	-113.55	-188.656	-170.63
43.2	-3.21259	0.989761	0.486633	1.6331	-52.3418	-113.55	-189.877	-171.241
43.25	-1.99189	4.95705	1.40216	-1.41865	-51.7314	-114.466	-191.403	-174.598
43.3	0.144341	0.684586	0.791809	2.54863	-53.5625	-111.719	-188.046	-174.903
43.35	-0.160835	1.29494	4.45392	0.717575	-52.0366	-112.329	-190.182	-173.987
43.4	-3.82294	2.51564	0.486633	0.412399	-48.6797	-116.297	-190.487	-173.682
43.45	-2.29707	-0.230942	1.70734	4.37968	-52.0366	-115.381	-186.215	-176.429
43.5	-0.160835	-0.230942	1.09699	0.107224	-52.0366	-112.329	-188.962	-175.513
43.55	-0.160835	2.21046	0.181458	2.54863	-51.1211	-114.466	-188.351	-175.513
43.6	-1.99189	-2.062	4.14874	3.76933	-49.5952	-115.076	-184.384	-170.936
43.65	-1.99189	-1.45165	-0.73407	2.24345	-52.6469	-112.024	-188.351	-171.241
43.7	0.449516	2.82082	1.40216	5.60039	-53.8677	-110.804	-188.046	-171.241
43.75	1.9754	-1.14647	-1.03925	3.15898	-51.7314	-112.94	-184.079	-169.104
43.8	-1.07636	-0.536118	0.181458	3.15898	-53.8677	-110.498	-188.656	-166.358
43.85	-0.771187	3.73634	1.40216	6.21074	-54.1728	-112.94	-188.046	-164.222
43.9	-0.466011	0.37941	-1.34442	3.15898	-53.5625	-114.771	-185.299	-166.053
43.95	1.9754	1.29494	2.01251	3.15898	-50.2055	-112.329	-190.182	-166.663
44	0.144341	4.04152	-1.34442	5.29521	-54.478	-116.907	-189.267	-166.663
44.05	-1.07636	1.90529	2.01251	0.717575	-53.5625	-115.076	-187.436	-163.611
44.1	-0.466011	0.989761	0.181458	2.85381	-52.6469	-115.686	-191.098	-163.306
44.15	2.28057	4.04152	0.181458	2.85381	-51.4262	-117.212	-189.877	-166.663
44.2	2.58575	3.12599	3.53839	1.93828	-53.5625	-112.635	-185.605	-166.968
44.25	0.449516	1.90529	-0.123718	3.46416	-54.478	-117.212	-188.351	-166.053
44.3	0.754692	3.43117	3.23321	2.24345	-52.6469	-115.992	-187.436	-164.527
44.35	1.05987	3.73634	0.181458	2.54863	-51.1211	-116.297	-183.468	-163.611
44.4	3.80645	1.29494	-1.03925	4.99004	-54.478	-116.907	-185.299	-166.968
44.45	2.58575	1.60011	3.23321	1.02275	-53.2573	-114.16	-185.299	-167.579
44.5	0.449516	5.87257	-1.95477	1.6331	-52.0366	-115.686	-182.858	-166.053
44.55	1.05987	1.29494	-0.428894	4.37968	-49.9004	-111.414	-183.468	-163.611
44.6	0.449516	1.29494	0.486633	1.32793	-53.5625	-114.771	-184.689	-162.391
44.65	3.1961	4.95705	-1.6496	1.93828	-51.4262	-111.719	-182.553	-163.917
44.7	1.36504	0.37941	0.791809	6.51591	-49.5952	-110.804	-182.248	-164.527
44.75	-0.466011	0.989761	-0.73407	3.15898	-47.459	-112.635	-184.994	-164.222
44.8	0.449516	2.51564	-1.95477	3.46416	-50.2055	-108.057	-184.079	-164.527
44.85	0.754692	2.82082	1.09699	8.04179	-49.5952	-112.024	-181.637	-163.917
44.9	1.67022	0.684586	-0.73407	2.85381	-47.7641	-111.719	-185.299	-165.748
44.95	0.754692	2.21046	-1.34442	2.85381	-46.2383	-112.024	-187.436	-168.494
45	-0.466011	6.17775	3.23321	7.12627	-48.3745	-113.55	-183.774	-169.104
45.05	-0.771187	1.60011	0.791809	2.54863	-47.7641	-110.498	-186.52	-169.41
45.1	-0.771187	2.21046	1.70734	1.93828	-47.1538	-113.855	-186.52	-167.579
45.15	1.05987	3.43117	4.75909	5.90556	-44.102	-113.855	-185.605	-165.748
45.2	-2.29707	4.04152	1.70734	1.93828	-46.2383	-109.583	-183.774	-168.494
45.25	-2.90742	1.29494	1.09699	2.24345	-48.3745	-113.55	-185.605	-167.884
45.3	-1.68671	1.90529	4.45392	3.46416	-48.0693	-113.245	-183.468	-166.968
45.35	-0.466011	5.26222	2.31769	1.93828	-45.6279	-109.278	-179.501	-166.053
45.4	-1.99189	0.989761	0.181458	1.32793	-44.4072	-113.55	-181.332	-164.832
45.45	-1.99189	1.29494	4.14874	4.07451	-48.3745	-112.024	-179.196	-163.001
45.5	-0.466011	0.989761	0.181458	3.15898	-49.29	-108.972	-177.67	-166.968
45.55	-3.21259	3.43117	0.181458	1.32793	-48.3745	-112.94	-176.144	-168.189
45.6	-0.160835	-0.536118	2.31769	4.68486	-46.2383	-112.024	-177.975	-167.884
45.65	-1.07636	0.684586	-0.428894	6.21074	-48.9848	-109.278	-177.365	-167.579
45.7	-1.99189	4.04152	-1.03925	3.46416	-49.9004	-113.245	-174.008	-164.832
45.75	1.9754	1.29494	1.40216	4.37968	-48.3745	-110.804	-176.144	-162.696
45.8	0.144341	0.989761	0.791809	7.12627	-46.5434	-109.278	-176.755	-163.917
45.85	3.50127	1.29494	-1.6496	3.76933	-51.7314	-112.329	-176.144	-167.273
45.9	0.144341	4.04152	1.40216	4.07451	-49.5952	-111.414	-173.398	-166.968
45.95	1.9754	0.684586	1.70734	6.82109	-46.2383	-108.667	-175.534	-166.053
46	1.9754	-0.230942	-0.73407	3.76933	-49.9004	-112.635	-177.06	-166.053
46.05	1.9754	0.989761	0.181458	2.24345	-46.8486	-111.719	-176.449	-163.611
46.1	2.89092	3.73634	4.14874	3.15898	-46.8486	-108.362	-175.534	-167.884
46.15	1.36504	0.684586	-0.428894	3.15898	-47.1538	-112.94	-180.111	-167.884
46.2	3.80645	0.074234	0.791809	0.412399	-42.5761	-112.94	-180.417	-166.663
46.25	0.754692	1.60011	4.45392	1.32793	-46.8486	-109.278	-179.501	-162.696
46.3	4.72198	3.43117	1.09699	4.07451	-42.8813	-112.329	-179.501	-165.748
46.35	-0.160835	0.37941	0.486633	1.02275	-46.8486	-113.55	-182.248	-165.137
46.4	3.50127	0.684586	3.53839	1.32793	-45.0176	-111.719	-181.943	-160.254
46.45	-0.466011	1.60011	1.70734	4.07451	-45.9331	-110.804	-177.975	-162.391
46.5	1.36504	4.95705	-1.03925	4.99004	-45.9331	-113.855	-178.28	-160.56
46.55	-0.771187	0.684586	0.486633	0.717575	-45.6279	-113.245	-180.111	-156.287
46.6	0.144341	-0.230942	2.92804	1.93828	-47.1538	-110.498	-178.586	-159.339
46.65	1.05987	0.989761	-1.03925	5.90556	-44.102	-112.635	-174.313	-157.813
46.7	-1.38154	2.51564	-1.03925	2.54863	-47.7641	-112.329	-175.534	-155.677
46.75	2.28057	-0.536118	2.62286	2.54863	-43.7969	-109.278	-177.365	-158.118
46.8	-2.60224	-1.75682	0.486633	4.07451	-45.9331	-110.498	-175.229	-155.677
46.85	0.449516	-1.45165	-1.6496	4.99004	-42.271	-111.719	-172.482	-158.729
46.9	-1.07636	0.684586	-0.123718	1.6331	-46.2383	-108.667	-171.261	-160.254
46.95	-0.160835	1.60011	2.92804	2.85381	-41.9658	-107.752	-173.703	-157.813
47	1.05987	-1.75682	0.486633	5.60039	-45.0176	-111.414	-172.482	-160.56
47.05	-0.160835	0.074234	-0.428894	1.32793	-41.6606	-109.583	-172.482	-158.118
47.1	3.1961	1.90529	2.31769	2.85381	-47.459	-106.531	-169.735	-162.085
47.15	-1.38154	4.04152	1.70734	5.60039	-43.7969	-108.667	-172.482	-160.254
47.2	0.449516	1.90529	-0.73407	1.32793	-47.1538	-109.278	-171.261	-158.423
47.25	2.28057	0.684586	0.181458	6.21074	-46.2383	-106.226	-171.261	-159.034
47.3	-1.68671	1.29494	3.23321	3.15898	-47.7641	-104.09	-167.599	-154.456
47.35	1.05987	4.3467	-1.03925	4.68486	-48.9848	-107.447	-169.43	-156.897
47.4	-1.68671	1.29494	-1.34442	4.68486	-45.6279	-107.141	-170.041	-152.93
47.45	-0.771187	0.074234	-0.123718	2.85381	-48.3745	-103.479	-168.82	-153.235
47.5	2.28057	0.989761	1.09699	5.90556	-44.4072	-103.785	-166.073	-152.93
47.55	-1.68671	2.51564	-1.95477	3.46416	-48.9848	-106.531	-164.547	-148.658
47.6	0.449516	-2.36717	-1.34442	5.60039	-45.6279	-104.7	-167.294	-151.404
47.65	1.9754	-2.062	0.181458	3.15898	-45.3227	-102.564	-167.294	-148.963
47.7	-0.466011	0.989761	1.09699	5.60039	-45.9331	-104.7	-165.768	-149.268
47.75	2.58575	-2.36717	-1.95477	3.46416	-42.271	-104.395	-163.937	-151.404
47.8	0.144341	-0.230942	-1.03925	5.29521	-46.5434	-103.174	-165.463	-148.963
47.85	-1.07636	0.074234	0.181458	2.54863	-43.7969	-101.038	-166.989	-152.93
47.9	4.11163	0.074234	0.486633	2.54863	-44.102	-103.479	-165.463	-154.456
47.95	-0.771187	3.43117	-3.17548	2.85381	-45.6279	-102.564	-163.022	-152.015
48	-1.68671	-0.841293	-1.34442	1.32793	-40.1347	-101.038	-160.58	-157.508
48.05	1.9754	3.12599	-0.428894	2.85381	-43.7969	-98.9017	-160.885	-157.508
48.1	-2.29707	-2.062	0.486633	1.32793	-41.9658	-102.869	-162.106	-155.677
48.15	-0.466011	1.29494	-2.8703	4.37968	-42.5761	-101.648	-160.275	-159.034
48.2	0.449516	-0.841293	-2.56513	2.54863	-43.1865	-100.122	-157.528	-158.118
48.25	-1.38154	0.684586	-1.03925	4.68486	-39.2192	-100.733	-155.392	-154.456
48.3	0.754692	0.37941	1.40216	0.107224	-42.5761	-103.785	-158.749	-158.118
48.35	0.754692	0.37941	-1.95477	4.68486	-40.7451	-104.7	-159.054	-155.677
48.4	-1.38154	2.21046	-1.95477	0.412399	-39.5244	-102.259	-157.223	-153.235
48.45	0.449516	0.074234	-0.428894	4.07451	-42.271	-102.259	-155.697	-157.203
48.5	0.754692	1.90529	3.23321	0.107224	-38.3037	-105.005	-154.782	-155.066
48.55	-0.160835	0.37941	-1.03925	4.99004	-41.6606	-103.785	-156.918	-153.846
48.6	2.28057	3.12599	-1.03925	1.02275	-41.6606	-102.869	-158.749	-158.423
48.65	-0.771187	-1.14647	-0.428894	4.37968	-37.3882	-101.343	-158.749	-158.118
48.7	-1.07636	2.82082	2.62286	0.412399	-41.9658	-104.395	-158.749	-154.151
48.75	3.1961	-0.230942	1.40216	4.37968	-40.4399	-104.395	-156.003	-158.118
48.8	-0.466011	2.51564	-1.6496	1.32793	-40.1347	-103.785	-156.613	-158.423
48.85	-0.466011	-1.14647	-1.03925	4.99004	-42.5761	-100.733	-159.97	-153.846
48.9	2.28057	2.82082	0.181458	0.412399	-40.4399	-102.259	-160.58	-157.203
48.95	-0.466011	0.684586	2.01251	3.46416	-41.9658	-101.953	-161.191	-156.592
49	0.144341	2.51564	0.181458	1.32793	-42.5761	-101.038	-159.054	-152.93
49.05	3.50127	1.60011	0.181458	2.85381	-38.914	-97.0706	-160.885	-153.846
49.1	0.144341	1.60011	1.09699	1.02275	-42.5761	-96.4603	-161.191	-155.066
49.15	-0.466011	4.04152	2.92804	1.6331	-42.271	-99.8172	-160.58	-152.93
49.2	3.1961	1.60011	3.23321	3.76933	-38.3037	-99.512	-156.613	-152.32
49.25	-0.771187	4.95705	-0.428894	1.6331	-41.6606	-98.5965	-159.665	-155.677
49.3	-1.07636	0.989761	0.181458	3.76933	-40.7451	-97.3758	-158.139	-154.151
49.35	0.449516	2.21046	1.09699	0.107224	-37.9985	-100.428	-155.087	-150.489
49.4	0.144341	2.51564	3.84357	3.46416	-41.9658	-101.953	-159.665	-154.761
49.45	-1.68671	2.51564	2.31769	-1.41865	-40.1347	-101.343	-158.139	-153.541
49.5	-0.466011	4.95705	-0.428894	0.717575	-40.4399	-101.038	-156.918	-151.404
49.55	0.449516	1.60011	0.791809	-2.02901	-42.271	-99.2069	-159.665	-154.456
49.6	-2.90742	4.3467	-0.428894	-0.197952	-39.8296	-101.343	-156.613	-157.203
49.65	-1.68671	2.82082	2.31769	1.32793	-40.7451	-102.564	-160.58	-156.592
49.7	-0.160835	1.60011	2.01251	-0.503128	-41.3554	-101.343	-160.58	-155.677
49.75	-3.21259	4.95705	-0.73407	3.15898	-39.2192	-99.8172	-162.106	-158.423
49.8	-1.68671	0.684586	-1.03925	-0.503128	-40.1347	-97.9862	-163.937	-157.203
49.85	1.9754	2.82082	-1.6496	4.07451	-41.0503	-101.343	-159.97	-154.151
49.9	-1.68671	3.12599	0.486633	0.412399	-38.914	-102.564	-162.716	-153.846
49.95	-2.60224	0.684586	2.31769	3.15898	-39.5244	-101.953	-159.359	-155.066
50	1.05987	5.87257	-0.428894	3.76933	-40.7451	-99.2069	-162.106	-152.32
50.05	-0.466011	0.37941	-2.25995	2.54863	-38.6089	-98.2913	-160.275	-150.489
50.1	-2.29707	-0.230942	-1.03925	6.21074	-40.7451	-99.512	-160.275	-155.066
50.15	-1.07636	2.51564	1.09699	1.32793	-40.4399	-99.8172	-159.054	-155.066
50.2	1.05987	-2.062	1.70734	4.07451	-38.3037	-100.428	-156.308	-154.151
50.25	-1.68671	0.989761	2.01251	1.93828	-39.2192	-100.122	-158.139	-156.287
50.3	-1.38154	-0.536118	-1.34442	1.93828	-40.4399	-97.9862	-152.646	-158.729
50.35	2.28057	-0.536118	-0.73407	3.46416	-37.083	-102.259	-154.782	-157.508
50.4	0.754692	3.43117	1.09699	0.412399	-37.6933	-105.005	-152.646	-154.761
50.45	0.449516	-0.230942	1.70734	5.29521	-39.5244	-105.005	-156.003	-156.897
50.5	1.36504	1.29494	4.45392	-0.197952	-37.6933	-104.395	-153.866	-157.813
50.55	1.67022	3.43117	3.23321	1.6331	-38.3037	-102.564	-153.866	-156.897
50.6	-0.466011	0.684586	1.40216	1.02275	-41.0503	-99.2069	-155.697	-152.32
50.65	0.144341	1.60011	0.181458	0.412399	-40.1347	-100.428	-153.256	-155.677
50.7	1.67022	2.51564	0.791809	4.99004	-40.1347	-101.343	-156.918	-155.372
50.75	-0.771187	-0.536118	1.70734	0.107224	-44.102	-99.2069	-156.613	-155.066
50.8	-1.07636	3.12599	2.31769	2.24345	-43.1865	-99.2069	-157.834	-151.709
50.85	1.05987	0.989761	-0.123718	2.24345	-39.5244	-95.5448	-160.885	-155.372
50.9	2.28057	0.074234	-2.25995	1.32793	-44.102	-94.9344	-159.359	-155.066
50.95	-0.466011	3.73634	-1.34442	4.68486	-43.7969	-97.9862	-161.496	-154.151
51	-0.771187	-0.230942	-1.95477	1.32793	-40.4399	-98.5965	-161.801	-150.794
51.05	1.36504	0.37941	0.181458	2.54863	-42.271	-98.5965	-157.223	-153.235
51.1	1.36504	4.3467	-1.95477	3.46416	-44.4072	-98.5965	-161.191	-153.235
51.15	-2.29707	-0.841293	-2.56513	2.24345	-42.8813	-97.681	-157.834	-150.794
51.2	-2.29707	-0.230942	-2.25995	4.99004	-41.6606	-95.8499	-154.782	-147.437
51.25	0.449516	3.43117	1.09699	1.32793	-44.7124	-98.2913	-156.003	-148.963
51.3	-0.160835	-0.536118	-2.25995	3.15898	-43.1865	-99.2069	-152.035	-149.573
51.35	-3.21259	0.989761	-1.6496	3.46416	-39.5244	-97.9862	-150.509	-148.353
51.4	-1.99189	3.73634	2.92804	1.02275	-43.4917	-99.512	-150.204	-144.69
51.45	0.449516	0.074234	-0.73407	4.07451	-41.6606	-97.3758	-148.373	-146.521
51.5	-1.38154	2.82082	-0.428894	2.24345	-38.6089	-95.8499	-150.815	-148.963
51.55	-2.29707	3.73634	2.92804	1.93828	-38.6089	-97.3758	-151.12	-149.878
51.6	-1.99189	0.37941	-0.73407	4.68486	-41.0503	-101.038	-148.373	-148.353
51.65	1.9754	2.21046	1.40216	0.412399	-39.2192	-100.122	-153.256	-148.963
51.7	-0.466011	3.12599	1.09699	3.76933	-37.083	-99.2069	-153.866	-152.625
51.75	-2.60224	0.074234	-0.428894	3.76933	-41.3554	-96.7655	-148.984	-153.541
51.8	-2.90742	0.37941	4.14874	2.24345	-41.3554	-99.512	-152.035	-154.761
51.85	0.449516	2.51564	-1.03925	5.60039	-38.914	-100.122	-152.34	-152.32
51.9	-1.68671	-0.230942	0.486633	2.24345	-39.8296	-98.5965	-146.542	-154.456
51.95	-4.12812	1.60011	-1.6496	3.15898	-42.5761	-96.1551	-151.425	-155.677
52	-2.60224	3.43117	-1.34442	7.73662	-41.3554	-100.122	-149.899	-154.456
52.05	-0.771187	-1.14647	0.486633	4.07451	-38.914	-98.2913	-145.932	-152.015
52.1	-0.160835	0.37941	-2.8703	5.60039	-41.0503	-96.1551	-150.509	-149.268
52.15	-2.29707	1.60011	2.01251	7.43144	-43.7969	-98.9017	-151.12	-152.32
52.2	-3.21259	-2.67235	-2.56513	5.29521	-42.271	-97.681	-147.763	-149.878
52.25	-1.38154	-1.75682	0.181458	6.51591	-40.4399	-97.681	-153.561	-147.132
52.3	0.144341	0.37941	-1.34442	6.51591	-44.4072	-98.5965	-154.477	-143.165
52.35	-2.60224	-2.67235	-1.95477	4.99004	-44.7124	-94.9344	-151.425	-143.775
52.4	-2.90742	-2.67235	0.181458	7.73662	-42.5761	-99.8172	-157.834	-145.606
52.45	-1.07636	0.684586	-2.25995	4.37968	-41.3554	-99.2069	-157.834	-144.08
52.5	1.36504	-2.062	1.09699	3.46416	-43.1865	-97.681	-154.782	-144.385
52.55	-0.466011	-2.062	-2.8703	7.12627	-42.5761	-99.8172	-157.834	-142.859
52.6	-4.12812	1.60011	-1.95477	3.46416	-39.8296	-94.6292	-157.528	-143.47
52.65	-2.60224	0.37941	1.09699	2.85381	-39.2192	-100.122	-154.172	-145.606
52.7	-0.160835	-1.45165	-2.25995	6.21074	-41.6606	-97.681	-155.697	-144.08
52.75	0.754692	-1.14647	-0.73407	2.24345	-40.7451	-98.2913	-156.003	-143.165
52.8	-1.68671	1.60011	-1.6496	2.54863	-39.5244	-99.512	-152.951	-140.418
52.85	-1.99189	-3.2827	-1.6496	5.29521	-38.914	-96.4603	-152.34	-140.113
52.9	-0.160835	-2.97752	2.31769	1.02275	-41.9658	-99.8172	-153.866	-142.249
52.95	2.28057	0.684586	-2.25995	2.85381	-41.3554	-95.8499	-151.73	-142.554
53	1.36504	-1.75682	-1.34442	5.90556	-39.2192	-96.7655	-148.678	-142.859
53.05	-1.38154	-3.58787	1.40216	2.24345	-38.6089	-97.681	-150.815	-141.028
53.1	-1.07636	-1.45165	-1.6496	4.68486	-40.4399	-94.3241	-148.984	-140.113
53.15	0.144341	-0.230942	-0.123718	5.60039	-40.7451	-97.681	-146.542	-142.249
53.2	1.9754	-3.89305	0.791809	2.54863	-39.2192	-95.5448	-148.678	-145.301
53.25	1.05987	-3.2827	-1.03925	4.07451	-38.3037	-95.8499	-148.068	-144.996
53.3	-1.99189	1.29494	1.09699	5.29521	-41.6606	-97.681	-145.321	-144.385
53.35	-0.771187	-2.062	1.70734	1.93828	-41.0503	-93.7137	-145.932	-143.775
53.4	0.144341	-1.75682	-0.428894	3.46416	-41.0503	-96.7655	-146.542	-144.385
53.45	2.58575	-0.536118	1.70734	6.51591	-37.3882	-95.8499	-144.406	-146.827
53.5	0.754692	1.90529	0.791809	2.54863	-40.1347	-93.1034	-141.354	-147.132
53.55	-1.07636	-1.75682	-0.123718	2.54863	-39.5244	-96.1551	-145.321	-146.521
53.6	0.449516	-0.841293	3.23321	7.12627	-38.3037	-94.6292	-143.49	-145.911
53.65	2.28057	2.21046	0.791809	2.85381	-36.1675	-92.1878	-139.523	-144.08
53.7	-1.38154	-0.230942	0.181458	2.85381	-34.9468	-95.8499	-141.049	-141.944
53.75	-0.466011	-2.062	2.62286	6.51591	-37.9985	-94.9344	-142.575	-143.47
53.8	2.89092	-2.062	-0.123718	4.07451	-37.9985	-91.8827	-142.27	-144.08
53.85	-1.38154	1.60011	-0.123718	3.46416	-37.3882	-95.2396	-139.523	-142.554
53.9	0.144341	-1.75682	0.486633	7.12627	-35.5571	-94.9344	-145.016	-143.165
53.95	3.50127	-1.75682	-0.123718	4.99004	-39.5244	-92.1878	-145.321	-140.723
54	-0.771187	-0.230942	-2.25995	2.85381	-39.5244	-94.9344	-143.49	-139.197
54.05	1.67022	2.21046	-1.6496	5.29521	-38.3037	-93.1034	-144.101	-141.639
54.1	-1.38154	-0.841293	-0.428894	5.29521	-37.9985	-91.5775	-146.237	-143.47
54.15	-1.07636	-0.536118	-3.48065	2.54863	-38.6089	-95.5448	-144.406	-143.165
54.2	1.67022	1.29494	-1.95477	2.54863	-37.6933	-94.6292	-141.659	-142.554
54.25	-0.160835	3.12599	-1.03925	5.29521	-36.1675	-90.0516	-142.27	-141.944
54.3	4.11163	0.074234	-3.17548	2.24345	-39.2192	-94.0189	-142.575	-139.197
54.35	-0.160835	0.074234	-1.34442	1.93828	-35.2519	-93.4085	-140.133	-139.502
54.4	3.50127	1.60011	1.40216	5.60039	-36.7778	-89.7464	-136.776	-141.028
54.45	0.754692	4.3467	-2.56513	4.37968	-36.7778	-93.4085	-139.828	-140.113
54.5	2.28057	0.684586	-2.8703	3.15898	-34.0312	-93.1034	-139.218	-138.282
54.55	1.36504	1.60011	1.40216	3.76933	-38.914	-92.7982	-137.997	-136.146
54.6	1.9754	2.82082	-1.03925	4.68486	-34.6416	-93.4085	-136.166	-139.197
54.65	1.67022	6.48292	-1.6496	3.15898	-37.9985	-94.9344	-139.218	-139.197
54.7	0.144341	2.51564	0.791809	4.37968	-36.7778	-93.1034	-137.082	-135.535
54.75	2.89092	1.60011	0.791809	7.12627	-37.9985	-91.5775	-136.471	-137.977
54.8	1.05987	1.90529	-1.6496	4.99004	-36.7778	-94.6292	-133.42	-137.977
54.85	4.72198	3.43117	-1.03925	4.37968	-37.083	-92.7982	-135.861	-135.23
54.9	-0.771187	1.29494	2.31769	6.21074	-39.5244	-90.6619	-134.335	-137.977
54.95	3.1961	-0.841293	-1.6496	8.34697	-37.6933	-93.4085	-130.978	-138.282
55	0.144341	0.37941	-1.03925	5.90556	-40.4399	-94.6292	-127.621	-135.23
55.05	1.05987	4.04152	2.01251	5.29521	-37.6933	-93.1034	-129.757	-137.977
55.1	1.05987	2.82082	0.486633	9.56767	-40.7451	-92.493	-130.368	-137.061
55.15	0.144341	-0.536118	-0.73407	8.65215	-37.083	-96.7655	-128.537	-139.197
55.2	3.1961	0.074234	0.486633	5.90556	-39.5244	-95.2396	-126.706	-139.502
55.25	-0.160835	1.90529	2.62286	6.82109	-35.2519	-93.1034	-130.978	-135.535
55.3	2.28057	3.73634	-2.25995	7.43144	-39.8296	-95.2396	-132.504	-139.808
55.35	1.05987	0.074234	-0.73407	4.99004	-35.2519	-94.3241	-132.504	-135.535
55.4	-0.160835	-1.14647	1.70734	4.99004	-40.4399	-92.1878	-130.673	-137.061
55.45	2.89092	-0.230942	-0.123718	4.99004	-36.4726	-91.5775	-132.504	-135.23
55.5	-0.466011	1.60011	-2.25995	3.76933	-40.4399	-94.6292	-135.556	-134.009
55.55	-0.466011	2.21046	-1.03925	7.73662	-37.6933	-93.1034	-135.556	-135.84
55.6	0.754692	-0.536118	3.23321	3.15898	-38.3037	-90.0516	-134.335	-131.263
55.65	-0.160835	-0.230942	-1.03925	6.21074	-36.4726	-92.493	-133.114	-135.535
55.7	3.1961	0.37941	-1.03925	3.76933	-33.4209	-93.1034	-137.082	-133.399
55.75	-1.07636	2.21046	0.791809	4.99004	-34.9468	-91.8827	-137.082	-133.399
55.8	-0.771187	-2.062	2.31769	3.46416	-30.6743	-89.7464	-137.387	-134.925
55.85	3.1961	-0.841293	-1.03925	4.37968	-35.8623	-93.4085	-134.64	-130.042
55.9	-0.160835	3.12599	-1.03925	4.37968	-31.895	-90.9671	-135.251	-134.62
55.95	2.28057	0.074234	0.791809	5.60039	-33.7261	-89.7464	-138.608	-132.483
56	1.05987	0.074234	1.70734	4.68486	-33.7261	-88.5257	-137.692	-132.483
56.05	0.449516	4.04152	-1.34442	5.60039	-29.1484	-91.2723	-138.302	-133.704
56.1	2.89092	0.37941	-1.6496	3.76933	-33.1157	-90.0516	-135.251	-130.347
56.15	-0.771187	0.684586	2.01251	5.60039	-31.2846	-87.6102	-138.302	-134.62
56.2	-0.771187	1.60011	2.31769	2.85381	-34.0312	-87.9154	-138.608	-134.009
56.25	2.28057	-0.536118	-0.73407	5.29521	-32.8105	-90.0516	-137.692	-130.958
56.3	-1.07636	3.73634	-1.03925	1.32793	-30.0639	-90.9671	-136.471	-134.009
56.35	1.36504	-0.536118	1.09699	5.29521	-32.8105	-88.2205	-134.945	-133.399
56.4	2.89092	2.51564	1.09699	1.6331	-29.4536	-88.2205	-136.166	-130.652
56.45	0.449516	0.074234	-2.56513	4.68486	-30.6743	-91.2723	-137.387	-134.009
56.5	1.36504	0.684586	-2.8703	2.54863	-30.9795	-91.5775	-136.776	-132.789
56.55	2.28057	-0.841293	-1.03925	6.21074	-26.707	-89.4412	-136.471	-131.873
56.6	-1.07636	-0.230942	-1.6496	2.24345	-31.5898	-88.2205	-133.725	-134.925
56.65	1.36504	0.37941	-3.48065	5.29521	-30.9795	-91.8827	-136.166	-132.483
56.7	1.05987	-0.230942	-2.8703	2.24345	-30.3691	-92.1878	-139.523	-130.958
56.75	-0.160835	1.60011	-1.34442	4.99004	-30.9795	-90.0516	-140.133	-134.009
56.8	1.05987	0.37941	-0.123718	2.24345	-28.8432	-90.0516	-138.302	-130.652
56.85	1.05987	1.90529	-2.8703	3.46416	-31.5898	-94.0189	-136.776	-130.347
56.9	0.449516	0.074234	-1.95477	0.717575	-30.9795	-94.9344	-136.471	-133.094
56.95	2.89092	1.90529	-1.34442	2.54863	-27.6225	-92.7982	-138.302	-130.652
57	0.449516	-0.536118	1.70734	1.02275	-32.8105	-91.5775	-138.302	-129.126
57.05	-1.07636	1.90529	-1.34442	3.46416	-29.7588	-93.1034	-136.776	-131.873
57.1	0.144341	-1.14647	-3.17548	1.02275	-29.7588	-94.6292	-134.335	-130.042
57.15	-0.771187	2.82082	-3.48065	3.46416	-31.5898	-93.1034	-131.589	-126.075
57.2	-2.29707	-1.45165	-0.123718	1.02275	-28.8432	-89.4412	-134.335	-131.873
57.25	0.144341	1.90529	-1.34442	4.37968	-32.2002	-89.7464	-135.861	-130.958
57.3	-0.466011	-1.75682	-4.091	0.717575	-32.2002	-91.2723	-135.251	-127.295
57.35	-0.466011	1.29494	-3.17548	6.21074	-29.7588	-90.9671	-134.335	-130.347
57.4	0.754692	0.074234	-1.34442	2.85381	-34.3364	-88.5257	-132.809	-130.652
57.45	-0.466011	-0.536118	2.62286	4.68486	-34.3364	-86.9998	-136.166	-127.601
57.5	-1.38154	1.90529	0.181458	2.54863	-31.895	-90.9671	-135.861	-128.821
57.55	-0.160835	-1.45165	-1.03925	4.37968	-35.2519	-91.5775	-133.42	-130.042
57.6	0.449516	3.12599	-0.73407	3.46416	-34.9468	-90.9671	-136.776	-127.601
57.65	-2.90742	-1.14647	1.09699	2.85381	-33.7261	-89.1361	-137.082	-127.295
57.7	-1.38154	0.37941	2.92804	4.68486	-37.6933	-89.1361	-133.42	-129.432
57.75	0.754692	-0.536118	-0.123718	2.85381	-34.6416	-91.8827	-137.082	-129.432
57.8	-2.90742	-1.14647	-1.34442	8.04179	-35.8623	-91.2723	-135.861	-126.99
57.85	-2.29707	1.90529	-1.34442	3.76933	-38.3037	-90.9671	-131.894	-131.263
57.9	1.05987	-4.19823	0.181458	6.82109	-34.9468	-89.1361	-133.42	-131.873
57.95	-2.60224	-2.062	0.791809	3.15898	-36.4726	-88.5257	-129.757	-130.652
58	-1.38154	-2.67235	-2.8703	5.29521	-36.1675	-89.7464	-132.809	-133.094
58.05	1.36504	-3.58787	-3.48065	5.29521	-34.6416	-89.4412	-130.673	-136.146
58.1	-1.68671	0.989761	-2.25995	2.54863	-36.7778	-88.8309	-129.452	-135.535
58.15	-1.07636	-2.67235	-0.73407	5.29521	-37.083	-87.305	-131.589	-134.314
58.2	1.9754	0.074234	-0.123718	1.93828	-33.4209	-85.474	-127.316	-137.366
58.25	1.9754	0.989761	-2.56513	5.29521	-36.4726	-88.2205	-132.504	-138.587
58.3	-0.160835	-1.75682	-1.6496	1.93828	-37.083	-89.1361	-128.842	-134.314
58.35	1.05987	2.21046	-1.34442	2.85381	-32.5053	-88.5257	-131.283	-136.146
58.4	5.02715	-1.14647	-1.03925	3.15898	-35.8623	-88.5257	-130.673	-137.977
58.45	-0.160835	0.074234	0.181458	1.6331	-37.9985	-86.0843	-130.368	-136.146
58.5	-0.771187	1.29494	-1.34442	5.60039	-34.3364	-88.8309	-130.673	-133.704
58.55	2.28057	-0.841293	-3.17548	0.717575	-37.083	-90.6619	-129.147	-135.535
58.6	0.754692	1.90529	-3.48065	4.37968	-37.083	-89.7464	-131.589	-135.23
58.65	-0.771187	1.60011	-2.56513	3.15898	-33.7261	-88.8309	-128.537	-134.009
58.7	-0.466011	0.989761	-1.03925	1.6331	-34.6416	-87.305	-131.589	-133.399
58.75	1.36504	4.04152	0.486633	3.15898	-34.9468	-86.9998	-128.842	-136.451
58.8	-1.68671	0.074234	-1.34442	1.02275	-32.5053	-89.7464	-132.809	-133.399
58.85	-1.68671	0.074234	-3.17548	5.60039	-32.5053	-89.4412	-130.673	-130.347
58.9	0.754692	3.43117	-2.56513	1.6331	-34.3364	-89.7464	-128.842	-131.263
58.95	0.754692	-1.45165	-1.95477	3.15898	-32.5053	-89.4412	-131.283	-132.178
59	-0.160835	0.989761	-0.123718	4.37968	-31.5898	-88.5257	-126.401	-130.652
59.05	0.449516	1.90529	-0.123718	3.46416	-34.0312	-87.305	-130.978	-126.685
59.1	3.1961	0.074234	-1.95477	6.82109	-34.3364	-89.1361	-127.621	-129.432
59.15	-1.07636	1.60011	-2.8703	3.15898	-30.9795	-90.3568	-127.011	-131.568
59.2	-1.68671	-0.841293	-1.6496	4.99004	-34.9468	-88.2205	-127.926	-130.958
59.25	0.754692	-0.536118	-1.03925	4.07451	-35.2519	-87.6102	-124.569	-129.126
59.3	1.36504	2.82082	-0.123718	4.07451	-33.1157	-86.0843	-128.537	-132.789
59.35	-2.60224	-2.062	0.486633	7.12627	-37.6933	-84.2533	-126.401	-133.704
59.4	-1.99189	-2.062	-2.8703	2.54863	-36.4726	-86.3895	-123.044	-133.399
59.45	0.449516	1.60011	-2.56513	3.46416	-34.6416	-87.9154	-126.706	-129.432
59.5	0.754692	-1.45165	-0.73407	3.76933	-35.8623	-86.6947	-124.569	-133.704
59.55	-3.51777	-0.536118	-1.34442	1.6331	-36.4726	-86.6947	-125.79	-135.535
59.6	-1.68671	2.82082	-4.091	4.37968	-34.3364	-85.7791	-126.706	-134.314
59.65	1.05987	-2.062	-3.17548	1.32793	-31.5898	-83.9481	-125.485	-132.789
59.7	1.05987	0.684586	-0.123718	1.6331	-35.8623	-83.0326	-129.757	-133.704
59.75	-1.38154	3.43117	-3.17548	4.37968	-35.2519	-85.7791	-127.926	-135.23
59.8	-0.771187	-0.536118	-1.03925	1.32793	-33.4209	-87.6102	-124.264	-134.009
59.85	1.9754	0.684586	2.31769	4.07451	-35.2519	-86.3895	-127.621	-130.652
59.9	1.9754	2.82082	-1.03925	3.46416	-35.8623	-84.8636	-126.401	-130.347
59.95	-2.29707	-0.230942	2.31769	2.85381	-35.5571	-81.5067	-122.128	-133.704
60	-1.07636	0.684586	1.09699	6.51591	-33.7261	-81.8119	-126.706	-134.314
60.05	0.754692	2.82082	0.181458	1.93828	-35.8623	-83.6429	-125.485	-132.789
60.1	1.05987	-0.230942	1.70734	3.76933	-34.6416	-80.5911	-123.959	-131.263
60.15	-2.29707	0.684586	-3.17548	5.90556	-32.8105	-79.3704	-127.926	-135.84
60.2	-1.38154	2.51564	-0.73407	2.54863	-34.3364	-79.9808	-126.706	-137.671
60.25	0.144341	-1.75682	-3.78583	4.68486	-35.5571	-83.3377	-125.485	-136.146
60.3	1.36504	-0.536118	-3.78583	3.15898	-34.6416	-82.7274	-128.537	-134.62
60.35	-1.38154	2.21046	-0.428894	3.76933	-31.5898	-80.5911	-127.926	-135.84
60.4	-1.38154	-1.75682	-3.17548	7.73662	-35.8623	-85.474	-126.706	-138.282
60.45	-0.160835	-0.841293	1.70734	2.24345	-34.6416	-84.2533	-129.757	-137.977
60.5	2.28057	2.82082	-3.78583	3.15898	-34.3364	-83.3377	-129.147	-137.061
60.55	-1.07636	-1.14647	0.181458	6.51591	-33.4209	-85.474	-127.011	-134.62
60.6	-2.29707	-1.45165	-1.03925	1.6331	-36.7778	-83.3377	-130.063	-137.366
60.65	-2.60224	2.51564	0.181458	1.93828	-36.4726	-84.5584	-127.621	-137.977
60.7	0.449516	-0.536118	2.31769	2.54863	-34.0312	-87.6102	-127.011	-137.977
60.75	-0.160835	0.074234	0.486633	-0.197952	-34.6416	-84.5584	-129.452	-136.451
60.8	-3.21259	2.82082	2.92804	1.32793	-36.4726	-88.2205	-127.011	-134.925
60.85	-2.29707	0.074234	-0.123718	0.412399	-36.4726	-86.6947	-126.095	-136.451
60.9	0.144341	-1.75682	0.791809	-1.11348	-32.2002	-89.7464	-129.757	-137.366
60.95	2.28057	0.989761	2.62286	2.24345	-32.8105	-89.7464	-128.537	-135.84
61	-1.38154	1.60011	-0.73407	1.6331	-35.8623	-88.2205	-124.264	-132.178
61.05	-2.60224	-1.75682	2.62286	0.412399	-34.6416	-90.3568	-127.926	-129.126
61.1	-0.160835	0.074234	-0.428894	4.07451	-31.5898	-85.7791	-127.621	-130.652
61.15	1.9754	2.51564	-1.03925	1.6331	-31.5898	-88.8309	-124.569	-131.263
61.2	2.58575	-1.14647	2.62286	1.6331	-34.6416	-86.0843	-127.316	-130.652
61.25	-0.160835	-0.841293	-1.6496	4.37968	-34.0312	-85.1688	-125.79	-128.516
61.3	-0.160835	2.51564	-0.428894	1.02275	-33.1157	-85.474	-122.738	-126.685
61.35	0.144341	0.074234	1.09699	0.717575	-32.2002	-79.9808	-125.18	-127.906
61.4	1.9754	-0.536118	-3.78583	5.60039	-35.2519	-83.0326	-126.095	-131.568
61.45	3.1961	-0.230942	-0.73407	2.54863	-34.3364	-80.286	-123.654	-130.652
61.5	0.449516	0.684586	-0.73407	1.93828	-31.895	-80.5911	-122.738	-130.652
61.55	-1.38154	-2.36717	-1.95477	6.21074	-30.0639	-81.2015	-126.095	-130.652
61.6	-0.771187	-1.14647	-0.73407	3.15898	-34.0312	-77.2342	-125.18	-129.737
61.65	-0.466011	0.37941	-0.73407	3.76933	-34.3364	-80.5911	-121.518	-131.568
61.7	1.05987	-1.75682	-1.03925	5.60039	-32.5053	-79.3704	-126.706	-133.399
61.75	-1.38154	-2.97752	0.791809	2.54863	-30.0639	-76.929	-126.401	-133.399
61.8	-0.771187	-1.75682	0.181458	2.24345	-33.7261	-79.9808	-123.959	-132.789
61.85	0.754692	0.074234	-2.25995	4.37968	-33.4209	-78.1497	-126.095	-131.263
61.9	3.50127	-4.5034	0.486633	2.54863	-32.5053	-79.0653	-127.621	-130.347
61.95	0.144341	-3.89305	-1.34442	0.717575	-28.5381	-81.8119	-126.401	-133.704
62	-0.160835	-1.14647	-3.17548	3.15898	-28.8432	-80.8963	-125.18	-133.399
62.05	1.36504	-2.67235	-0.428894	2.54863	-30.3691	-83.3377	-127.621	-132.483
62.1	-0.466011	-5.11375	-0.73407	1.32793	-29.4536	-85.7791	-127.926	-130.958
62.15	-1.07636	-3.89305	-1.95477	2.54863	-27.3174	-84.2533	-125.485	-127.601
62.2	0.754692	-0.841293	-0.428894	3.15898	-24.5708	-84.8636	-127.316	-126.685
62.25	-2.60224	-3.58787	0.181458	1.02275	-28.8432	-86.0843	-127.011	-128.821
62.3	-2.29707	-4.5034	-2.25995	1.93828	-29.1484	-83.3377	-125.18	-128.516
62.35	0.449516	-3.2827	-0.73407	4.07451	-27.0122	-84.2533	-122.128	-128.211
62.4	-2.29707	-0.230942	-0.428894	0.412399	-26.0967	-83.9481	-125.79	-126.99
62.45	2.28057	-3.2827	-2.8703	1.02275	-29.1484	-81.5067	-125.485	-127.601
62.5	-1.68671	-3.2827	-1.6496	4.07451	-29.4536	-81.5067	-123.654	-125.159
62.55	0.449516	-1.14647	1.40216	0.717575	-25.4863	-82.117	-123.959	-127.906
62.6	0.449516	1.60011	-2.25995	1.93828	-30.9795	-80.5911	-127.621	-129.737
62.65	-0.771187	-1.14647	-2.8703	3.76933	-31.2846	-79.0653	-127.621	-129.126
62.7	1.05987	-1.45165	1.09699	4.99004	-29.4536	-81.5067	-126.401	-127.906
62.75	-1.68671	0.684586	-1.6496	2.85381	-32.8105	-80.286	-127.621	-124.854
62.8	1.36504	2.21046	-1.95477	4.99004	-31.2846	-77.5394	-130.368	-124.549
62.85	-3.21259	-0.536118	0.181458	8.04179	-32.5053	-81.2015	-128.537	-126.38
62.9	0.144341	0.074234	-1.03925	4.37968	-32.8105	-79.9808	-123.959	-125.77
62.95	-3.82294	0.989761	-1.95477	3.15898	-30.9795	-76.3187	-126.095	-122.107
63	-1.38154	3.43117	-0.428894	4.68486	-33.7261	-80.286	-125.485	-126.075
63.05	-3.21259	-0.536118	1.40216	4.68486	-29.4536	-79.0653	-123.044	-126.685
63.1	-2.60224	0.074234	-2.25995	2.54863	-33.4209	-76.6239	-118.161	-124.244
63.15	-1.99189	0.37941	-2.25995	3.15898	-29.4536	-78.1497	-121.213	-128.211
63.2	-1.07636	2.82082	2.31769	5.60039	-33.1157	-80.5911	-121.823	-127.601
63.25	1.36504	-0.230942	-2.56513	2.54863	-29.7588	-78.1497	-121.213	-125.77
63.3	-0.160835	-2.062	-1.6496	2.85381	-33.7261	-77.2342	-118.161	-129.432
63.35	3.1961	-2.36717	-0.428894	4.37968	-30.9795	-79.9808	-122.433	-129.126
63.4	-1.68671	-0.841293	0.181458	4.99004	-32.5053	-79.6756	-123.959	-126.38
63.45	1.67022	-0.841293	-2.56513	1.93828	-30.6743	-74.7928	-123.044	-128.516
63.5	-0.466011	-3.89305	-2.8703	3.46416	-31.895	-77.8446	-122.433	-125.77
63.55	0.144341	-3.2827	2.01251	7.12627	-30.9795	-78.4549	-124.875	-126.99
63.6	1.9754	-1.45165	-1.95477	1.93828	-30.0639	-76.3187	-127.316	-126.38
63.65	-0.466011	0.684586	-3.48065	2.54863	-30.6743	-76.0135	-128.842	-124.244
63.7	4.4168	-2.36717	-1.34442	5.60039	-30.0639	-79.3704	-126.095	-127.601
63.75	-1.38154	-2.062	0.181458	2.24345	-31.895	-77.5394	-127.621	-124.244
63.8	0.754692	-1.75682	-2.56513	0.412399	-29.4536	-76.0135	-130.673	-128.211
63.85	0.754692	0.684586	-1.95477	3.15898	-31.5898	-78.7601	-131.283	-126.685
63.9	-1.99189	0.989761	0.486633	0.412399	-27.6225	-78.7601	-130.063	-127.601
63.95	1.67022	-1.75682	-1.03925	4.07451	-32.8105	-77.8446	-127.926	-129.126
64	-1.99189	-2.062	-2.25995	0.107224	-30.0639	-78.1497	-130.673	-124.244
64.05	-0.466011	-0.230942	-0.73407	1.32793	-33.1157	-80.5911	-129.452	-128.211
64.1	1.67022	-0.536118	2.31769	2.24345	-30.9795	-79.9808	-126.706	-124.244
64.15	-1.68671	-2.062	-0.428894	2.54863	-30.9795	-77.5394	-122.128	-124.854
64.2	0.449516	-2.062	-1.34442	4.07451	-30.9795	-80.8963	-124.264	-124.549
64.25	1.05987	1.29494	-0.428894	2.54863	-26.4018	-82.117	-125.485	-120.582
64.3	0.144341	-3.2827	1.70734	3.46416	-29.4536	-80.5911	-123.349	-124.549
64.35	3.50127	-1.14647	-1.03925	2.54863	-27.6225	-78.4549	-120.602	-123.633
64.4	0.144341	0.37941	-0.73407	2.24345	-28.2329	-81.8119	-118.161	-123.938
64.45	-0.771187	-2.97752	-0.123718	1.32793	-28.8432	-82.7274	-121.518	-126.38
64.5	2.89092	0.684586	2.31769	2.24345	-26.0967	-80.8963	-121.518	-123.328
64.55	-1.38154	-0.536118	-1.6496	2.54863	-31.2846	-77.8446	-121.213	-126.685
64.6	1.05987	-0.230942	-1.03925	1.93828	-29.7588	-79.3704	-118.466	-127.601
64.65	1.67022	1.90529	-0.123718	2.85381	-32.5053	-78.1497	-116.94	-123.023
64.7	-0.160835	0.684586	2.31769	0.412399	-33.4209	-75.4032	-119.992	-126.99
64.75	1.9754	4.95705	-1.6496	4.37968	-30.6743	-72.6566	-119.381	-127.295
64.8	0.449516	-0.230942	-1.6496	1.6331	-35.8623	-76.0135	-118.771	-124.244
64.85	-0.466011	3.12599	-0.73407	3.15898	-33.4209	-76.3187	-116.33	-127.295
64.9	3.1961	-1.14647	2.01251	0.107224	-34.3364	-76.3187	-116.94	-126.99
64.95	-0.771187	2.51564	-1.34442	4.68486	-35.8623	-74.1825	-120.602	-123.633
65	-1.99189	0.074234	-2.56513	0.717575	-32.5053	-77.5394	-120.907	-128.211
65.05	1.05987	0.684586	-1.95477	3.76933	-37.3882	-78.7601	-122.128	-126.075
65.1	-3.21259	-1.14647	0.791809	0.107224	-36.4726	-77.8446	-122.128	-123.328
65.15	-3.21259	-0.536118	-0.73407	3.46416	-35.2519	-74.1825	-121.823	-126.38
65.2	-1.07636	-1.45165	-1.6496	0.107224	-37.6933	-76.6239	-123.654	-125.464
65.25	-4.12812	-2.36717	-0.428894	4.07451	-35.5571	-77.8446	-125.18	-122.413
65.3	-2.29707	-0.841293	1.40216	1.02275	-37.9985	-77.2342	-124.875	-124.244
65.35	1.05987	-2.67235	2.01251	4.37968	-39.2192	-74.1825	-124.875	-123.938
65.4	-2.90742	0.684586	-1.95477	1.93828	-35.8623	-75.7083	-122.128	-121.497
65.45	-2.29707	-2.062	-0.73407	6.51591	-39.8296	-77.5394	-124.264	-124.549
65.5	1.05987	1.60011	-0.73407	1.93828	-37.3882	-77.2342	-125.485	-125.464
65.55	-2.60224	-1.75682	0.791809	5.90556	-34.3364	-76.0135	-124.569	-123.023
65.6	-1.38154	2.21046	-1.95477	2.54863	-37.3882	-75.7083	-123.349	-125.159
65.65	1.67022	-3.2827	-3.17548	6.21074	-34.6416	-79.0653	-120.297	-127.295
65.7	-2.29707	-0.841293	-3.48065	1.6331	-34.3364	-79.3704	-123.349	-126.685
65.75	-0.771187	-3.58787	-2.56513	3.46416	-35.2519	-79.3704	-125.79	-125.77
65.8	2.28057	-2.36717	0.486633	2.54863	-32.5053	-77.5394	-124.875	-131.263
65.85	-1.99189	0.074234	-2.25995	1.93828	-36.7778	-79.3704	-123.959	-129.737
65.9	-1.38154	-1.75682	-1.95477	2.85381	-36.1675	-82.7274	-128.232	-127.295
65.95	1.9754	1.90529	-2.56513	1.02275	-30.9795	-80.5911	-128.537	-130.958
66	-1.68671	-0.536118	-0.123718	4.68486	-35.8623	-79.0653	-124.875	-130.958
66.05	-3.51777	1.90529	1.09699	1.32793	-34.9468	-76.3187	-127.621	-128.821
66.1	-0.160835	0.684586	-1.03925	4.68486	-30.6743	-79.3704	-126.095	-128.211
66.15	-1.99189	0.37941	-1.03925	-0.503128	-34.6416	-80.286	-123.959	-129.126
66.2	-2.90742	3.12599	-1.34442	3.46416	-32.5053	-79.0653	-126.401	-127.295
66.25	-0.771187	-1.45165	0.791809	2.85381	-31.2846	-78.1497	-121.213	-124.854
66.3	-1.99189	-0.230942	2.92804	2.54863	-35.5571	-77.8446	-124.875	-128.821
66.35	-2.60224	-0.841293	0.181458	4.99004	-34.0312	-81.8119	-124.264	-128.211
66.4	-0.466011	-0.841293	-1.34442	1.32793	-32.8105	-81.8119	-123.654	-124.854
66.45	0.144341	2.82082	-0.428894	5.60039	-37.083	-80.5911	-126.095	-127.295
66.5	-2.90742	-2.062	0.486633	2.24345	-35.5571	-78.7601	-121.823	-127.601
66.55	-1.68671	0.37941	2.01251	3.46416	-34.3364	-76.0135	-127.011	-126.38
66.6	1.67022	0.989761	-0.428894	2.85381	-36.7778	-76.3187	-123.654	-123.938
66.65	-1.99189	0.074234	-2.25995	1.6331	-35.5571	-76.6239	-126.401	-127.906
66.7	-0.466011	3.43117	-0.428894	5.60039	-35.2519	-75.098	-123.654	-128.211
66.75	2.89092	0.074234	0.181458	0.107224	-35.8623	-73.5721	-124.264	-126.075
66.8	0.754692	1.60011	1.70734	2.24345	-33.7261	-72.3514	-125.18	-126.38
66.85	1.05987	4.95705	2.01251	3.15898	-31.5898	-74.1825	-122.433	-128.821
66.9	1.67022	1.60011	-0.73407	0.717575	-34.3364	-75.7083	-124.875	-128.516
66.95	1.67022	3.73634	-1.03925	2.85381	-32.2002	-76.6239	-120.907	-124.244
67	-0.771187	3.73634	-1.03925	0.107224	-30.3691	-76.6239	-125.18	-126.685
67.05	-1.07636	2.51564	0.791809	0.717575	-31.895	-73.5721	-121.518	-126.99
67.1	1.36504	5.5674	2.01251	4.68486	-31.895	-75.4032	-123.044	-126.38
67.15	-2.29707	2.51564	0.791809	0.107224	-29.7588	-78.1497	-122.433	-122.413
67.2	-1.99189	1.29494	-1.03925	1.02275	-33.4209	-79.0653	-121.518	-125.77
67.25	-0.466011	5.5674	-2.8703	4.99004	-33.1157	-76.929	-123.349	-125.159
67.3	-0.160835	1.90529	-2.8703	1.93828	-30.6743	-74.4876	-118.771	-122.413
67.35	-3.21259	1.90529	-1.95477	3.15898	-34.0312	-72.9618	-122.433	-120.887
67.4	-2.29707	4.04152	-1.03925	4.07451	-34.0312	-72.6566	-121.518	-123.633
67.45	1.9754	0.074234	-1.6496	2.24345	-30.6743	-73.8773	-119.687	-123.328
67.5	-0.771187	2.21046	-4.091	5.29521	-34.0312	-74.1825	-119.992	-122.413
67.55	-0.771187	1.90529	-4.091	4.37968	-35.2519	-74.1825	-115.414	-122.107
67.6	1.05987	0.684586	-3.17548	3.15898	-32.5053	-73.2669	-116.33	-124.854
67.65	4.11163	3.43117	-2.25995	6.21074	-32.5053	-72.3514	-116.025	-125.77
67.7	-0.160835	1.60011	-0.73407	2.85381	-34.9468	-72.6566	-112.057	-126.685
67.75	-0.160835	0.37941	-4.70136	3.15898	-33.1157	-76.6239	-114.193	-124.854
67.8	1.05987	2.82082	-5.31171	5.90556	-29.7588	-77.8446	-112.057	-128.211
67.85	1.36504	0.989761	-4.70136	1.32793	-32.5053	-78.4549	-112.668	-128.211
67.9	-1.38154	0.684586	-1.95477	2.85381	-32.5053	-79.0653	-115.719	-126.99
67.95	-1.99189	3.43117	-5.31171	4.07451	-28.5381	-77.2342	-114.499	-125.464
68	0.754692	1.29494	-4.091	-0.503128	-33.4209	-75.7083	-116.635	-127.906
68.05	1.36504	0.989761	0.791809	1.6331	-31.895	-78.1497	-117.856	-129.126
68.1	-2.29707	5.5674	-2.56513	2.54863	-28.8432	-79.6756	-115.109	-128.821
68.15	-1.38154	1.29494	-1.95477	0.412399	-29.7588	-78.7601	-116.33	-125.77
68.2	1.05987	1.60011	2.62286	1.6331	-32.5053	-78.4549	-115.414	-127.601
68.25	1.05987	4.95705	-1.34442	2.24345	-31.895	-77.2342	-111.447	-127.601
68.3	-1.38154	1.90529	-0.73407	1.02275	-28.5381	-74.4876	-114.804	-126.685
68.35	-1.68671	2.21046	-0.428894	3.15898	-33.1157	-77.8446	-113.278	-123.328
68.4	1.05987	4.65187	-0.73407	1.6331	-33.1157	-78.7601	-108.395	-121.802
68.45	1.05987	0.684586	2.92804	0.717575	-31.5898	-78.1497	-112.668	-123.938
68.5	-1.07636	1.29494	-2.25995	3.46416	-30.9795	-74.7928	-113.278	-123.023
68.55	-1.38154	4.95705	0.486633	1.32793	-34.6416	-79.6756	-110.837	-123.023
68.6	1.05987	0.074234	-0.428894	1.32793	-34.0312	-79.0653	-115.109	-120.276
68.65	0.144341	0.989761	-1.03925	4.68486	-29.7588	-77.5394	-114.499	-122.107
68.7	-1.68671	4.04152	1.09699	2.24345	-32.2002	-78.1497	-111.142	-123.633
68.75	-1.38154	1.90529	-2.25995	2.54863	-34.0312	-78.7601	-115.414	-123.023
68.8	0.144341	0.684586	2.31769	6.51591	-32.2002	-76.0135	-115.109	-120.887
68.85	2.89092	4.04152	-2.25995	3.15898	-29.1484	-77.5394	-112.362	-118.14
68.9	-0.466011	2.82082	-1.95477	2.85381	-32.5053	-78.7601	-117.55	-120.887
68.95	-0.466011	2.21046	-1.95477	6.21074	-32.8105	-73.5721	-117.55	-119.971
69	0.754692	4.04152	-2.8703	2.54863	-31.2846	-78.4549	-114.499	-119.971
69.05	2.58575	4.04152	0.486633	1.32793	-30.6743	-77.2342	-118.161	-116.919
69.1	0.754692	0.989761	-4.091	4.07451	-33.4209	-76.6239	-118.466	-116.309
69.15	-1.38154	3.12599	-0.123718	1.93828	-32.8105	-78.4549	-115.719	-120.887
69.2	-1.99189	4.95705	-3.17548	1.32793	-30.9795	-74.1825	-118.771	-121.802
69.25	0.144341	0.989761	-1.6496	2.85381	-30.6743	-79.6756	-118.771	-120.887
69.3	1.67022	1.29494	0.791809	1.93828	-32.2002	-76.929	-117.55	-119.361
69.35	-2.29707	5.5674	-2.56513	1.6331	-31.5898	-77.8446	-118.466	-119.056
69.4	-1.68671	2.21046	0.181458	3.76933	-30.0639	-79.0653	-118.466	-121.497
69.45	-1.68671	1.90529	-0.428894	3.76933	-28.2329	-74.7928	-116.025	-122.107
69.5	0.754692	4.04152	-1.03925	1.32793	-30.6743	-79.3704	-114.804	-119.666
69.55	0.754692	3.12599	2.01251	2.24345	-31.2846	-75.4032	-116.94	-118.14
69.6	-2.29707	1.90529	-2.25995	4.07451	-30.3691	-76.929	-116.94	-116.614
69.65	-1.99189	1.90529	-1.6496	0.412399	-30.9795	-77.2342	-114.193	-118.445
69.7	-0.771187	4.3467	1.09699	1.32793	-33.4209	-74.4876	-118.466	-120.582
69.75	0.754692	0.989761	-4.091	4.68486	-32.8105	-77.8446	-117.856	-120.276
69.8	-1.07636	0.989761	-2.56513	1.32793	-30.3691	-75.7083	-113.278	-120.887
69.85	-3.21259	4.3467	-0.123718	1.6331	-29.7588	-76.6239	-116.94	-118.14
69.9	-3.21259	1.29494	-3.78583	4.07451	-32.5053	-78.1497	-116.33	-116.919
69.95	-1.99189	1.90529	-2.25995	1.32793	-31.5898	-74.4876	-114.193	-120.582
70	-0.160835	2.21046	-2.25995	1.32793	-30.6743	-77.5394	-114.804	-120.887
70.05	-3.82294	4.65187	-2.56513	3.46416	-27.6225	-76.0135	-117.245	-120.276
70.1	-4.73847	0.37941	-1.03925	3.76933	-30.9795	-72.3514	-117.245	-119.056
70.15	-3.51777	0.074234	-1.34442	1.32793	-31.2846	-75.098	-115.719	-118.14
70.2	-0.771187	3.12599	-1.6496	3.76933	-30.0639	-73.2669	-121.518	-119.361
70.25	-2.60224	3.43117	0.181458	6.21074	-27.9277	-71.1307	-121.823	-122.718
70.3	-4.12812	0.989761	0.181458	1.93828	-28.8432	-75.098	-120.907	-124.854
70.35	-1.99189	1.90529	-1.34442	1.93828	-32.5053	-73.5721	-121.823	-124.244
70.4	0.449516	4.65187	-0.73407	5.60039	-31.895	-72.6566	-124.875	-123.938
70.45	-3.51777	1.90529	-0.73407	4.07451	-31.5898	-76.3187	-123.654	-123.633
70.5	-1.07636	-0.536118	-3.17548	1.32793	-28.8432	-75.4032	-119.687	-123.023
70.55	0.754692	0.684586	-1.6496	3.15898	-31.895	-75.7083	-123.044	-123.633
70.6	-1.07636	2.21046	-1.03925	5.29521	-32.2002	-77.8446	-122.128	-124.854
70.65	2.58575	-0.841293	-3.78583	1.6331	-30.6743	-76.3187	-120.297	-124.854
70.7	-0.466011	-2.67235	-1.03925	1.02275	-28.2329	-75.7083	-119.992	-123.938
70.75	-0.466011	-1.75682	0.181458	3.76933	-30.3691	-79.0653	-122.433	-122.107
70.8	0.754692	0.989761	-3.48065	3.76933	-30.0639	-78.1497	-122.128	-119.971
70.85	-1.38154	-2.67235	-2.56513	2.24345	-27.3174	-74.7928	-118.466	-122.107
70.9	1.67022	-2.062	1.40216	2.85381	-31.5898	-77.8446	-118.466	-124.854
70.95	-2.90742	-0.841293	-2.25995	4.99004	-31.2846	-76.929	-119.992	-125.464
71	-0.160835	1.60011	-2.25995	4.68486	-29.1484	-72.9618	-119.076	-125.159
71.05	-2.90742	-1.14647	1.40216	2.85381	-33.4209	-76.929	-113.583	-123.328
71.1	-1.99189	0.074234	-1.95477	2.85381	-30.9795	-76.6239	-115.719	-123.023
71.15	-1.38154	0.37941	-0.73407	5.60039	-33.1157	-74.4876	-116.025	-124.244
71.2	-1.38154	2.82082	1.09699	1.6331	-31.5898	-75.7083	-113.583	-123.633
71.25	0.449516	-0.841293	0.181458	2.24345	-29.7588	-75.4032	-110.226	-122.107
71.3	-2.29707	-0.536118	-1.95477	2.24345	-32.2002	-74.1825	-113.278	-120.582
71.35	0.754692	0.684586	0.486633	4.37968	-27.9277	-74.4876	-113.888	-122.413
71.4	-2.29707	3.12599	1.40216	0.107224	-32.5053	-77.8446	-113.583	-121.192
71.45	1.67022	0.074234	-1.95477	0.107224	-27.9277	-75.7083	-111.752	-117.53
71.5	-1.99189	0.074234	-0.428894	2.85381	-33.4209	-73.5721	-114.804	-122.107
71.55	1.67022	-1.45165	2.62286	3.15898	-29.1484	-77.5394	-114.804	-121.802
71.6	0.144341	1.90529	-0.428894	-0.197952	-31.895	-77.5394	-115.109	-120.276
71.65	1.67022	0.989761	-1.03925	0.717575	-29.7588	-73.2669	-112.668	-123.328
71.7	2.89092	-1.14647	1.40216	3.46416	-31.895	-75.098	-114.804	-121.802
71.75	0.449516	-0.841293	2.92804	4.37968	-31.895	-76.6239	-115.109	-123.328
71.8	3.80645	0.074234	-0.123718	1.32793	-32.2002	-74.4876	-114.499	-123.938
71.85	0.144341	3.12599	0.791809	1.6331	-32.5053	-72.9618	-112.362	-120.276
71.9	1.9754	-0.536118	3.53839	3.15898	-31.5898	-75.7083	-115.109	-124.244
71.95	-0.771187	-1.45165	1.40216	1.93828	-33.1157	-76.0135	-118.466	-120.582
72	-1.07636	-0.230942	1.70734	-0.197952	-29.7588	-73.5721	-116.94	-122.718
72.05	2.28057	1.90529	2.92804	2.85381	-32.2002	-75.7083	-116.33	-121.497
72.1	-1.07636	0.37941	3.53839	2.24345	-28.2329	-77.2342	-114.804	-119.971
72.15	0.754692	-2.36717	-0.123718	1.02275	-30.6743	-75.7083	-117.245	-122.413
72.2	-0.160835	-2.062	0.181458	3.15898	-27.6225	-73.5721	-116.635	-117.225
72.25	-0.771187	-0.841293	3.23321	0.717575	-30.3691	-77.5394	-116.94	-122.107
72.3	2.89092	1.60011	0.181458	1.6331	-27.0122	-77.2342	-115.109	-119.056
72.35	-1.07636	-1.14647	-1.03925	2.85381	-29.7588	-75.4032	-117.245	-119.056
72.4	-0.160835	-1.75682	0.181458	-0.503128	-28.8432	-74.7928	-118.771	-119.666
72.45	1.67022	0.37941	3.53839	3.46416	-27.3174	-78.1497	-118.771	-115.699
72.5	-1.38154	0.684586	-0.428894	-0.503128	-28.2329	-76.0135	-115.414	-119.361
72.55	1.36504	-2.67235	-1.03925	3.46416	-25.1811	-73.2669	-113.888	-116.614
72.6	-1.68671	-3.2827	0.791809	-0.503128	-29.4536	-75.4032	-116.33	-119.361
72.65	-1.99189	-0.230942	2.92804	2.54863	-27.0122	-78.1497	-116.025	-120.582
72.7	2.89092	-3.89305	-1.34442	-1.11348	-29.1484	-76.6239	-114.193	-116.004
72.75	-1.68671	-1.75682	-0.123718	2.54863	-30.3691	-73.8773	-112.668	-120.887
72.8	-1.38154	-2.062	0.791809	0.412399	-27.0122	-76.6239	-111.752	-120.276
72.85	0.144341	-3.89305	2.62286	3.46416	-31.2846	-77.2342	-113.888	-118.445
72.9	-3.82294	1.60011	-1.95477	1.02275	-28.8432	-75.7083	-113.888	-120.887
72.95	-1.07636	-2.36717	-2.56513	3.76933	-30.3691	-71.1307	-113.583	-119.971
73	-2.60224	0.989761	0.181458	1.6331	-31.2846	-73.8773	-111.447	-119.971
73.05	-3.82294	-1.45165	2.31769	2.85381	-25.7915	-73.8773	-113.583	-121.192
73.1	-0.771187	0.37941	-1.03925	1.02275	-30.3691	-72.9618	-117.55	-118.75
73.15	-2.29707	0.684586	0.181458	3.76933	-27.6225	-69.91	-118.466	-120.582
73.2	-2.90742	-0.230942	1.70734	0.717575	-28.5381	-70.5203	-118.771	-122.107
73.25	0.754692	2.51564	5.36945	3.46416	-29.4536	-72.9618	-116.635	-118.14
73.3	-1.99189	-0.841293	2.31769	-0.808304	-24.5708	-72.9618	-117.245	-120.276
73.35	-1.68671	3.43117	1.09699	3.46416	-29.4536	-69.6048	-119.687	-121.192
73.4	1.05987	0.37941	2.62286	0.717575	-27.9277	-70.8255	-117.55	-118.14
73.45	-2.60224	3.43117	5.67462	2.24345	-26.707	-74.4876	-116.635	-120.276
73.5	-1.68671	1.29494	3.53839	0.717575	-29.4536	-73.5721	-113.888	-119.361
73.55	1.9754	4.3467	0.181458	2.24345	-26.4018	-71.4359	-112.362	-115.699
73.6	-3.21259	0.989761	1.09699	1.32793	-29.4536	-69.91	-113.278	-118.14
73.65	-2.29707	3.43117	2.92804	1.02275	-30.0639	-73.2669	-113.583	-117.835
73.7	2.28057	-0.230942	3.23321	3.46416	-25.4863	-73.2669	-112.362	-115.699
73.75	-1.07636	3.43117	-1.03925	0.717575	-30.3691	-72.0462	-111.142	-116.004
73.8	-0.466011	0.37941	-1.03925	4.68486	-30.3691	-70.8255	-109.616	-118.445
73.85	3.50127	2.21046	1.09699	2.24345	-27.9277	-73.8773	-110.531	-116.004
73.9	-0.160835	-0.536118	3.53839	5.90556	-29.7588	-76.0135	-114.499	-116.004
73.95	0.144341	1.29494	0.791809	1.32793	-28.5381	-76.0135	-114.804	-118.75
74	4.72198	1.29494	-0.73407	2.85381	-28.5381	-73.8773	-114.499	-119.056
74.05	-0.466011	-0.841293	0.486633	1.32793	-30.3691	-73.8773	-113.278	-116.614
74.1	0.144341	2.51564	2.92804	-0.197952	-25.7915	-75.7083	-116.33	-120.276
74.15	2.89092	-0.230942	3.23321	2.85381	-28.2329	-75.4032	-117.856	-120.582
74.2	-0.771187	3.12599	0.486633	0.107224	-28.8432	-74.4876	-116.025	-117.835
74.25	-2.29707	-1.14647	0.486633	4.37968	-25.4863	-71.7411	-117.245	-121.802
74.3	1.05987	0.684586	1.40216	-1.11348	-28.2329	-73.2669	-118.771	-121.497
74.35	-1.68671	0.989761	3.23321	2.54863	-27.3174	-75.098	-117.55	-120.276
74.4	-2.29707	0.074234	2.01251	2.54863	-23.6553	-74.7928	-118.771	-121.497
74.45	-0.771187	3.12599	-1.34442	1.93828	-27.3174	-75.098	-119.381	-123.023
74.5	-1.99189	0.074234	-1.03925	4.68486	-26.4018	-74.1825	-116.025	-121.192
74.55	-1.99189	2.82082	-0.428894	1.93828	-23.3501	-76.3187	-120.602	-118.75
74.6	-0.466011	1.90529	1.40216	4.99004	-26.707	-77.8446	-117.245	-122.107
74.65	0.449516	0.684586	1.09699	1.6331	-26.0967	-77.5394	-114.804	-122.107
74.7	-2.60224	3.43117	-1.6496	2.24345	-23.3501	-76.6239	-117.55	-118.14
74.75	-1.07636	-0.536118	-1.03925	4.68486	-27.3174	-74.1825	-113.888	-119.971
74.8	1.9754	1.60011	-1.34442	0.717575	-26.4018	-73.8773	-118.466	-119.361
74.85	-1.07636	1.60011	0.791809	4.68486	-25.7915	-75.7083	-115.414	-118.75
74.9	-1.38154	-0.230942	2.01251	0.717575	-29.1484	-75.098	-117.856	-114.783
74.95	3.1961	2.51564	-1.03925	0.717575	-28.5381	-74.4876	-115.414	-118.14
75	0.449516	0.989761	-1.03925	3.46416	-27.0122	-72.3514	-117.245	-117.835
75.05	-0.466011	1.60011	-1.34442	0.717575	-29.7588	-71.4359	-117.55	-116.614
75.1	0.754692	3.73634	0.791809	3.46416	-29.4536	-73.5721	-114.499	-117.53
75.15	1.9754	0.37941	2.62286	-0.197952	-27.3174	-74.7928	-116.94	-118.14
75.2	-1.38154	3.73634	0.486633	0.717575	-29.7588	-73.8773	-115.109	-116.614
75.25	-0.771187	2.51564	-0.123718	4.07451	-28.5381	-73.5721	-119.076	-112.647
75.3	1.9754	1.90529	0.181458	-0.197952	-26.4018	-71.7411	-115.719	-116.614
75.35	-1.38154	6.48292	0.486633	2.85381	-30.0639	-72.9618	-118.771	-114.783
75.4	-2.29707	2.21046	1.70734	0.412399	-28.5381	-76.3187	-118.466	-114.478
75.45	-1.38154	3.43117	3.23321	1.02275	-25.1811	-76.0135	-117.856	-114.478
75.5	0.449516	5.87257	0.791809	4.68486	-29.7588	-74.7928	-118.161	-118.75
75.55	-3.21259	0.989761	-0.123718	0.412399	-28.8432	-75.098	-114.499	-119.056
75.6	-2.90742	2.21046	1.09699	2.54863	-25.4863	-73.2669	-119.687	-117.225
75.65	0.144341	1.90529	0.486633	3.46416	-28.2329	-74.7928	-118.771	-118.445
75.7	-1.07636	0.074234	2.01251	2.54863	-28.8432	-76.929	-119.687	-120.887
75.75	-1.68671	1.29494	3.23321	4.68486	-25.1811	-76.929	-119.992	-119.666
75.8	-1.38154	0.074234	0.486633	1.6331	-27.6225	-76.0135	-116.635	-116.614
75.85	2.58575	-0.536118	-1.6496	-0.197952	-27.3174	-73.5721	-120.297	-116.919
75.9	-0.160835	2.21046	-1.03925	2.85381	-24.5708	-71.4359	-118.161	-118.75
75.95	0.144341	-1.45165	-0.428894	-0.503128	-25.7915	-72.0462	-115.719	-116.004
76	2.28057	-2.36717	1.40216	1.6331	-26.0967	-73.8773	-115.109	-112.037
76.05	3.1961	2.21046	1.09699	1.93828	-25.4863	-75.4032	-112.057	-111.121
76.1	0.754692	-2.062	-1.95477	1.32793	-24.5708	-74.7928	-115.414	-111.731
76.15	-0.160835	-0.841293	0.181458	4.07451	-28.5381	-74.7928	-114.804	-110.816
76.2	2.89092	1.60011	2.62286	0.717575	-27.9277	-74.4876	-112.668	-107.764
76.25	2.89092	-1.45165	0.486633	0.412399	-24.5708	-73.8773	-118.771	-108.68
76.3	0.754692	0.074234	-1.03925	4.68486	-27.6225	-75.7083	-116.635	-111.121
76.35	0.144341	1.60011	1.40216	0.107224	-27.6225	-77.2342	-115.109	-112.037
76.4	2.28057	-1.75682	2.92804	-0.197952	-25.1811	-78.4549	-117.55	-110.206
76.45	3.1961	-0.230942	0.181458	2.24345	-23.9604	-78.4549	-115.414	-109.595
76.5	-1.38154	1.90529	2.01251	-0.808304	-25.4863	-76.6239	-116.025	-113.563
76.55	-0.466011	-0.841293	-0.123718	0.412399	-24.2656	-73.8773	-114.804	-115.088
76.6	0.754692	0.684586	-1.03925	1.02275	-19.3828	-75.7083	-110.837	-114.478
76.65	1.05987	2.21046	2.01251	-1.41865	-23.6553	-77.2342	-113.888	-113.563
76.7	-1.99189	-1.14647	-3.48065	0.717575	-23.6553	-76.929	-113.888	-117.225
76.75	-1.38154	0.684586	-1.03925	0.412399	-23.6553	-76.0135	-110.226	-118.75
76.8	0.144341	0.989761	0.486633	-1.11348	-24.2656	-74.7928	-112.057	-118.75
76.85	0.754692	-1.45165	-0.73407	1.32793	-27.9277	-78.7601	-112.057	-116.004
76.9	-1.99189	0.37941	2.31769	-0.197952	-27.3174	-76.929	-108.09	-115.394
76.95	-1.07636	0.989761	-1.03925	0.412399	-25.7915	-75.098	-112.057	-117.225
77	0.449516	-1.45165	2.31769	2.54863	-27.6225	-76.929	-110.531	-115.699
77.05	3.1961	-0.230942	0.181458	-0.808304	-27.3174	-76.929	-106.869	-113.257
77.1	-0.160835	3.12599	-0.73407	-0.197952	-26.707	-75.098	-110.531	-109.9
77.15	0.449516	-0.841293	2.01251	1.6331	-24.5708	-76.3187	-110.226	-113.868
77.2	0.144341	-0.536118	-0.123718	0.717575	-27.9277	-76.0135	-108.395	-114.783
77.25	2.28057	2.82082	3.84357	-0.503128	-28.5381	-71.4359	-111.752	-115.394
77.3	0.754692	-1.45165	-0.428894	2.24345	-26.707	-76.929	-113.278	-114.173
77.35	-0.771187	-0.841293	0.791809	1.6331	-25.7915	-75.098	-108.7	-114.173
77.4	-0.160835	2.21046	0.181458	0.717575	-29.4536	-73.5721	-112.362	-117.225
77.45	1.36504	-1.14647	-1.03925	1.93828	-29.7588	-76.0135	-112.057	-116.919
77.5	3.80645	-1.75682	2.92804	1.93828	-27.3174	-72.9618	-109.311	-116.309
77.55	0.449516	0.989761	-1.95477	0.412399	-26.0967	-76.929	-111.142	-113.868
77.6	0.144341	0.074234	-0.123718	3.15898	-30.0639	-75.098	-109.921	-113.257
77.65	0.449516	-2.36717	0.181458	2.24345	-29.1484	-76.3187	-107.785	-115.088
77.7	3.50127	-0.230942	0.486633	1.93828	-27.0122	-76.929	-108.395	-116.614
77.75	2.28057	1.90529	4.14874	2.85381	-26.4018	-72.6566	-109.616	-117.225
77.8	-0.771187	-1.14647	-0.123718	5.60039	-29.1484	-75.4032	-108.09	-116.309
77.85	0.144341	-1.14647	0.791809	2.85381	-27.0122	-72.0462	-105.954	-115.394
77.9	0.449516	3.43117	4.14874	4.07451	-26.0967	-74.7928	-109.311	-117.835
77.95	2.89092	1.60011	-0.123718	5.90556	-25.7915	-72.9618	-108.7	-118.445
78	1.36504	0.989761	2.62286	2.54863	-30.0639	-70.2152	-106.869	-117.53
78.05	-1.38154	1.60011	3.84357	2.54863	-29.7588	-73.2669	-111.142	-116.309
78.1	-1.38154	1.90529	2.01251	6.82109	-27.6225	-68.9945	-110.226	-113.868
78.15	-0.466011	0.684586	3.53839	1.6331	-25.4863	-72.9618	-107.785	-115.394
78.2	1.9754	2.51564	1.70734	1.93828	-27.9277	-71.4359	-111.752	-118.14
78.25	-0.466011	5.87257	0.791809	4.37968	-27.6225	-69.2996	-111.752	-116.614
78.3	-1.99189	1.29494	3.53839	1.93828	-27.0122	-72.0462	-109.921	-116.004
78.35	-1.38154	2.51564	-0.123718	0.412399	-23.6553	-70.5203	-110.226	-113.868
78.4	0.144341	3.73634	-1.03925	2.54863	-25.7915	-71.1307	-111.447	-112.952
78.45	1.9754	4.04152	2.31769	4.37968	-26.707	-73.2669	-110.531	-116.004
78.5	-0.466011	0.684586	-0.123718	0.412399	-26.707	-70.8255	-107.785	-117.835
78.55	-0.160835	0.989761	-0.123718	1.02275	-23.6553	-74.4876	-112.057	-117.225
78.6	1.36504	4.95705	2.62286	5.29521	-23.9604	-74.4876	-112.973	-116.919
78.65	2.89092	2.51564	0.181458	2.54863	-26.707	-71.4359	-109.616	-115.699
78.7	-2.29707	0.684586	-0.123718	1.6331	-26.0967	-75.7083	-111.752	-112.647
78.75	-0.160835	1.29494	2.31769	4.07451	-25.4863	-75.098	-114.804	-115.699
78.8	2.28057	4.04152	-0.73407	5.29521	-23.9604	-70.2152	-114.804	-116.614
78.85	-2.29707	1.90529	-1.03925	2.54863	-27.0122	-73.5721	-112.668	-116.614
78.9	-1.68671	0.074234	1.70734	4.07451	-27.9277	-72.9618	-115.719	-116.614
78.95	-0.466011	2.82082	0.181458	6.51591	-26.707	-68.9945	-115.719	-114.478
79	-1.07636	3.43117	-2.25995	3.15898	-24.5708	-71.4359	-112.362	-112.342
79.05	2.89092	0.684586	-0.428894	2.54863	-27.9277	-71.4359	-111.752	-114.173
79.1	-1.38154	0.37941	1.09699	4.07451	-28.8432	-67.1634	-113.278	-116.004
79.15	0.449516	2.51564	-1.95477	4.99004	-25.1811	-71.1307	-111.752	-115.699
79.2	-0.466011	2.82082	-1.34442	1.02275	-26.4018	-71.4359	-109.005	-113.868
79.25	-0.771187	-0.536118	2.92804	1.93828	-27.3174	-68.3841	-111.752	-113.257
79.3	0.144341	0.37941	-1.03925	3.76933	-25.4863	-70.2152	-113.583	-110.206
79.35	-1.99189	1.60011	0.791809	2.54863	-26.4018	-72.3514	-112.362	-111.121
79.4	1.67022	1.60011	3.23321	0.107224	-26.0967	-71.4359	-109.311	-113.257
79.45	-2.60224	0.074234	0.791809	2.24345	-22.4345	-72.3514	-112.668	-114.173
79.5	0.449516	0.074234	-0.123718	4.07451	-25.7915	-74.7928	-112.057	-112.342
79.55	-1.99189	2.51564	2.62286	2.24345	-22.4345	-73.5721	-110.837	-111.426
79.6	1.67022	2.82082	2.31769	1.02275	-24.2656	-71.4359	-109.005	-115.394
79.65	-0.466011	-1.14647	0.486633	2.54863	-23.3501	-73.5721	-113.888	-115.088
79.7	0.449516	0.074234	1.70734	5.29521	-22.7397	-72.6566	-112.668	-112.037
79.75	0.754692	1.60011	3.84357	1.93828	-24.876	-69.2996	-110.531	-114.173
79.8	0.144341	2.21046	0.486633	1.6331	-22.7397	-74.4876	-108.09	-114.173
79.85	2.89092	-0.536118	-0.73407	2.24345	-24.2656	-73.2669	-111.142	-110.511
79.9	0.144341	-0.536118	3.23321	5.60039	-22.4345	-70.2152	-109.311	-113.257
79.95	4.4168	-0.230942	0.486633	1.6331	-25.4863	-72.3514	-106.564	-112.952
80	0.754692	2.51564	-0.428894	1.93828	-20.2983	-74.1825	-105.038	-110.511
80.05	3.80645	-0.536118	-0.428894	2.85381	-25.7915	-72.3514	-108.7	-113.868
80.1	-0.160835	-1.45165	1.09699	4.99004	-22.1294	-70.8255	-108.395	-112.342
80.15	0.754692	-1.14647	-1.6496	1.93828	-26.4018	-74.4876	-108.09	-114.783
80.2	0.754692	1.29494	-1.95477	1.02275	-22.1294	-74.1825	-106.259	-114.783
80.25	-1.38154	0.989761	0.791809	2.85381	-26.4018	-70.5203	-111.447	-111.731
80.3	2.89092	-1.14647	-1.03925	2.85381	-24.5708	-72.6566	-110.837	-116.004
80.35	-2.60224	-0.536118	-1.34442	0.107224	-26.4018	-72.9618	-109.921	-112.647
80.4	-0.160835	0.37941	0.486633	0.412399	-24.2656	-71.7411	-107.48	-114.783
80.45	-2.29707	3.43117	3.23321	3.15898	-25.7915	-70.5203	-110.837	-114.173
80.5	-2.29707	1.29494	-0.73407	0.717575	-25.7915	-73.5721	-112.973	-112.952
80.55	1.05987	0.074234	0.791809	3.15898	-24.5708	-72.3514	-112.362	-115.394
80.6	-2.90742	0.989761	1.40216	2.24345	-27.6225	-69.6048	-111.447	-110.511
80.65	0.144341	3.12599	2.01251	0.107224	-23.6553	-70.5203	-112.057	-115.699
80.7	0.144341	1.90529	-0.73407	5.29521	-27.6225	-71.7411	-116.025	-113.563
80.75	-1.68671	-0.536118	-1.34442	0.412399	-24.5708	-70.8255	-115.109	-114.173
80.8	1.67022	0.37941	1.09699	2.85381	-27.9277	-69.6048	-112.973	-116.004
80.85	-1.07636	4.3467	1.09699	-1.11348	-25.7915	-72.9618	-110.837	-111.121
80.9	-1.07636	0.37941	-2.25995	1.6331	-24.876	-72.9618	-110.837	-115.088
80.95	1.9754	0.989761	-1.6496	0.717575	-26.707	-72.0462	-111.447	-113.563
81	-2.60224	3.73634	1.09699	1.32793	-23.3501	-71.1307	-109.311	-114.173
81.05	-1.07636	0.074234	0.486633	-0.503128	-26.707	-73.5721	-106.564	-114.783
81.1	0.754692	0.989761	-1.95477	-1.11348	-25.1811	-72.6566	-106.869	-112.647
81.15	-1.38154	2.51564	-1.6496	-0.503128	-27.0122	-70.5203	-110.531	-115.699
81.2	1.67022	0.074234	1.70734	-0.503128	-29.4536	-69.91	-110.837	-116.004
81.25	-0.466011	3.12599	-1.34442	-0.808304	-24.876	-72.6566	-110.531	-111.731
81.3	0.144341	0.684586	-2.56513	-0.808304	-30.6743	-70.8255	-110.531	-114.783
81.35	4.72198	2.51564	-2.56513	0.107224	-29.1484	-68.3841	-109.921	-114.173
81.4	-1.07636	2.21046	0.791809	0.107224	-29.1484	-68.9945	-113.278	-110.511
81.45	-0.771187	1.29494	0.181458	-0.197952	-31.2846	-71.4359	-112.973	-114.173
81.5	2.89092	2.51564	-1.95477	-0.503128	-26.0967	-71.1307	-112.362	-113.257
81.55	-1.68671	0.684586	-0.428894	-0.197952	-30.0639	-68.0789	-108.7	-110.816
81.6	-1.07636	3.12599	2.31769	0.107224	-29.1484	-68.0789	-106.869	-114.478
81.65	1.05987	-0.230942	2.31769	-1.41865	-27.3174	-70.8255	-109.921	-111.731
81.7	-1.38154	4.04152	-0.428894	-1.11348	-29.1484	-70.2152	-110.531	-109.9
81.75	0.449516	0.37941	0.486633	-1.11348	-25.1811	-68.0789	-109.921	-113.868
81.8	0.449516	5.26222	1.70734	-0.808304	-29.4536	-66.2479	-107.785	-112.647
81.85	-1.07636	0.684586	3.84357	0.107224	-30.0639	-69.91	-106.869	-109.29
81.9	0.449516	5.26222	1.09699	-0.503128	-26.707	-69.6048	-110.226	-112.037
81.95	0.449516	0.989761	-0.428894	2.54863	-30.9795	-67.7738	-110.837	-111.121
82	-1.38154	4.95705	0.181458	1.02275	-29.1484	-65.9427	-111.142	-107.459
82.05	0.449516	0.989761	3.84357	5.90556	-29.1484	-70.2152	-108.7	-111.731
82.1	-0.160835	2.82082	1.70734	1.93828	-31.895	-70.2152	-106.564	-111.426
82.15	-1.07636	0.989761	-1.6496	5.29521	-30.0639	-69.6048	-108.09	-108.68
82.2	1.67022	2.21046	-1.03925	0.717575	-31.2846	-67.1634	-109.616	-111.426
82.25	-0.160835	1.90529	1.09699	2.85381	-32.8105	-69.2996	-109.311	-111.731
82.3	-1.07636	0.989761	2.62286	-0.808304	-28.5381	-72.3514	-106.564	-110.816
82.35	0.754692	4.65187	-1.34442	-0.197952	-31.895	-72.3514	-105.649	-111.426
82.4	0.144341	1.29494	-1.34442	1.6331	-30.9795	-70.5203	-108.7	-114.173
82.45	-1.99189	5.5674	0.486633	-0.503128	-26.4018	-69.6048	-109.921	-112.952
82.5	0.144341	0.989761	2.31769	2.85381	-29.4536	-73.2669	-108.7	-110.816
82.55	0.754692	3.12599	3.23321	-0.808304	-27.3174	-74.1825	-108.7	-116.309
82.6	-1.99189	2.21046	0.181458	1.93828	-24.2656	-73.2669	-111.142	-116.309
82.65	-0.771187	0.989761	0.486633	0.412399	-27.3174	-70.5203	-108.09	-113.563
82.7	0.754692	4.04152	2.01251	-0.197952	-24.5708	-72.0462	-106.564	-116.919
82.75	-1.38154	-0.841293	2.92804	2.24345	-23.9604	-74.4876	-109.311	-117.53
82.8	0.449516	2.51564	2.62286	-0.197952	-25.4863	-74.1825	-105.649	-115.394
82.85	1.67022	0.684586	-0.428894	3.15898	-23.6553	-73.5721	-106.869	-115.394
82.9	-1.38154	-0.536118	-1.03925	-0.503128	-24.876	-71.7411	-108.09	-117.53
82.95	0.144341	4.04152	-0.428894	0.107224	-25.1811	-73.2669	-104.733	-114.783
83	3.1961	0.37941	1.40216	1.02275	-21.8242	-74.1825	-108.09	-112.342
83.05	-0.160835	3.43117	2.31769	-0.197952	-25.4863	-73.8773	-104.123	-116.004
83.1	-0.466011	1.29494	-0.123718	4.68486	-26.0967	-73.2669	-107.48	-116.004
83.15	1.67022	0.37941	0.181458	-0.503128	-22.7397	-71.4359	-105.649	-113.563
83.2	-0.466011	4.95705	-0.73407	0.717575	-24.876	-72.3514	-106.259	-113.868
83.25	-1.38154	0.37941	1.09699	1.6331	-27.0122	-73.5721	-108.395	-115.394
83.3	-1.07636	1.29494	2.31769	1.02275	-23.9604	-75.4032	-105.038	-114.173
83.35	0.144341	1.29494	0.181458	3.46416	-27.0122	-75.4032	-109.005	-110.511
83.4	-3.21259	0.37941	-2.25995	1.02275	-27.6225	-73.8773	-105.343	-113.868
83.45	-2.29707	2.51564	-1.6496	1.6331	-26.0967	-72.9618	-109.921	-114.783
83.5	-0.466011	-0.536118	-1.03925	2.24345	-27.6225	-75.098	-107.48	-112.952
83.55	-3.82294	0.074234	1.09699	1.02275	-27.0122	-76.0135	-109.616	-110.816
83.6	-2.90742	3.43117	1.09699	3.46416	-24.2656	-74.1825	-110.531	-114.783
83.65	-0.771187	0.37941	-0.73407	0.717575	-26.4018	-72.0462	-109.005	-114.478
83.7	-2.29707	0.989761	-1.34442	1.02275	-27.0122	-68.9945	-110.837	-112.037
83.75	-3.21259	2.21046	-0.123718	2.85381	-24.5708	-71.1307	-106.259	-112.342
83.8	-1.68671	0.074234	0.486633	-0.503128	-25.4863	-72.9618	-111.752	-114.173
83.85	1.67022	2.82082	2.92804	3.15898	-26.0967	-72.3514	-109.005	-114.173
83.9	-1.99189	1.90529	3.84357	1.32793	-24.876	-71.7411	-110.226	-110.511
83.95	-1.99189	0.074234	1.09699	1.93828	-23.3501	-71.1307	-110.837	-111.731
84	0.144341	4.95705	0.486633	5.29521	-25.4863	-69.6048	-107.174	-112.647
84.05	-0.160835	0.989761	-0.123718	1.02275	-22.7397	-71.7411	-111.142	-110.206
84.1	-1.68671	0.989761	-1.6496	2.85381	-21.2138	-74.4876	-109.005	-105.323
84.15	-0.160835	4.04152	0.791809	3.76933	-24.2656	-74.7928	-109.616	-108.68
84.2	2.58575	0.37941	2.31769	1.32793	-23.3501	-75.098	-109.005	-109.29
84.25	0.449516	2.82082	-1.95477	4.07451	-19.9931	-73.5721	-105.649	-108.68
84.3	1.05987	4.04152	-2.56513	0.107224	-25.1811	-72.0462	-109.921	-106.543
84.35	1.05987	1.29494	-1.6496	0.107224	-24.876	-72.9618	-108.395	-108.68
84.4	2.89092	2.82082	-0.428894	2.85381	-21.519	-75.098	-107.174	-110.511
84.45	-1.07636	4.95705	1.40216	-1.11348	-23.3501	-74.1825	-110.837	-110.206
84.5	-1.99189	1.90529	-1.34442	-0.197952	-25.1811	-73.2669	-108.395	-108.68
84.55	-1.07636	3.12599	-0.428894	2.24345	-23.0449	-71.7411	-109.005	-111.121
84.6	-0.771187	3.12599	1.70734	-1.72383	-21.8242	-69.6048	-109.616	-113.868
84.65	-2.90742	1.29494	1.09699	0.412399	-23.9604	-68.3841	-107.174	-114.173
84.7	-1.99189	2.21046	-0.428894	1.93828	-23.0449	-71.4359	-109.311	-112.952
84.75	0.449516	2.51564	2.01251	-0.197952	-19.3828	-72.0462	-109.311	-112.952
84.8	-0.466011	0.684586	1.70734	2.85381	-23.3501	-72.6566	-105.649	-116.309
84.85	-1.38154	2.82082	0.181458	0.107224	-23.6553	-72.9618	-109.005	-116.309
84.9	-1.99189	1.90529	4.14874	0.717575	-21.519	-71.1307	-110.226	-114.478
84.95	1.05987	-0.230942	1.09699	4.99004	-20.9087	-70.5203	-105.038	-112.952
85	0.754692	0.989761	1.70734	-0.197952	-23.6553	-74.4876	-109.311	-114.173
85.05	-1.68671	0.684586	3.84357	0.107224	-21.8242	-74.4876	-107.48	-113.563
85.1	-1.38154	-0.841293	-0.428894	2.54863	-19.688	-72.6566	-104.428	-112.952
85.15	0.754692	1.60011	2.62286	-0.503128	-22.7397	-69.6048	-107.48	-109.595
85.2	0.754692	0.684586	-0.123718	-0.503128	-24.2656	-74.1825	-105.343	-110.511
85.25	-1.99189	0.37941	0.791809	2.54863	-22.4345	-72.6566	-101.681	-112.037
85.3	-1.68671	3.73634	0.791809	-1.41865	-21.2138	-69.6048	-105.954	-111.426
85.35	1.05987	3.73634	-1.34442	-0.503128	-25.7915	-71.1307	-105.343	-110.816
85.4	-0.160835	0.989761	2.92804	3.15898	-26.0967	-72.6566	-102.902	-108.375
85.45	-1.68671	2.51564	-1.34442	-1.72383	-23.3501	-70.8255	-106.869	-110.511
85.5	-1.68671	4.65187	1.40216	-0.808304	-22.7397	-72.9618	-107.785	-112.037
85.55	0.754692	1.29494	-1.6496	1.93828	-25.1811	-72.9618	-103.818	-112.342
85.6	2.28057	1.29494	0.791809	-2.02901	-25.1811	-68.3841	-106.869	-108.985
85.65	-0.771187	5.26222	0.791809	-2.33418	-22.7397	-73.2669	-104.733	-107.459
85.7	-1.07636	0.074234	-0.73407	0.717575	-23.9604	-71.1307	-100.461	-111.121
85.75	-1.38154	1.90529	2.92804	-2.02901	-25.7915	-68.9945	-103.818	-113.257
85.8	0.754692	4.04152	-1.34442	-1.11348	-24.876	-69.91	-101.376	-114.478
85.85	-0.466011	0.989761	0.486633	1.6331	-21.2138	-68.9945	-96.1881	-112.647
85.9	-1.07636	0.989761	-0.123718	-2.63936	-23.0449	-72.3514	-101.376	-111.731
85.95	-0.466011	2.51564	-1.03925	-1.11348	-24.2656	-71.1307	-102.292	-114.783
86	1.05987	3.12599	2.31769	3.46416	-23.0449	-70.8255	-98.0192	-115.394
86.05	2.89092	0.074234	-0.73407	0.107224	-20.2983	-72.6566	-100.155	-113.257
86.1	0.144341	1.90529	0.791809	2.24345	-22.7397	-69.2996	-101.376	-111.731
86.15	-0.466011	4.65187	2.01251	5.90556	-24.2656	-71.7411	-99.8502	-108.68
86.2	0.144341	0.684586	0.181458	4.68486	-24.876	-69.6048	-99.545	-109.595
86.25	1.36504	0.074234	3.84357	4.68486	-22.7397	-71.1307	-102.292	-111.121
86.3	2.28057	3.73634	2.92804	6.82109	-25.1811	-72.0462	-101.071	-109.29
86.35	-0.466011	1.90529	1.40216	5.60039	-27.3174	-67.1634	-98.6295	-107.764
86.4	-0.466011	0.684586	4.45392	2.85381	-27.6225	-70.8255	-101.986	-105.628
86.45	-0.160835	1.60011	2.01251	4.37968	-25.7915	-68.6893	-100.766	-105.323
86.5	1.67022	2.82082	1.40216	3.76933	-27.3174	-70.2152	-97.1036	-108.069
86.55	2.89092	-0.230942	5.36945	0.412399	-29.7588	-71.4359	-100.766	-108.375
86.6	0.449516	0.37941	0.486633	0.107224	-30.0639	-66.8582	-101.071	-109.9
86.65	-0.466011	3.12599	1.09699	2.24345	-28.2329	-72.3514	-99.545	-109.595
86.7	0.144341	0.989761	4.14874	-2.94453	-27.3174	-71.4359	-99.545	-107.154
86.75	2.58575	0.684586	-0.73407	-2.63936	-30.3691	-69.2996	-102.902	-108.985
86.8	1.36504	2.21046	-0.123718	0.717575	-27.9277	-72.3514	-102.597	-112.647
86.85	-1.38154	4.65187	2.31769	-0.808304	-25.7915	-70.5203	-98.6295	-112.342
86.9	-1.38154	0.989761	-0.73407	-2.63936	-24.5708	-69.91	-102.292	-111.731
86.95	2.28057	0.989761	0.791809	-1.41865	-27.0122	-73.2669	-102.292	-110.511
87	-0.771187	2.21046	2.92804	1.6331	-27.6225	-72.3514	-99.8502	-108.985
87.05	-1.38154	2.51564	-0.73407	-1.41865	-27.9277	-71.4359	-99.8502	-109.595
87.1	1.67022	-1.45165	-0.123718	-0.503128	-25.1811	-75.098	-102.597	-111.426
87.15	-1.07636	-0.230942	3.84357	2.54863	-25.4863	-72.3514	-104.428	-111.426
87.2	0.144341	3.43117	-1.03925	0.717575	-27.6225	-70.2152	-101.986	-111.426
87.25	2.89092	1.60011	-0.428894	1.02275	-27.9277	-72.9618	-107.48	-110.206
87.3	-1.07636	0.074234	2.92804	2.24345	-25.4863	-70.5203	-108.7	-108.68
87.35	0.449516	0.989761	-1.03925	4.99004	-23.9604	-69.2996	-109.005	-105.628
87.4	0.449516	4.3467	-1.6496	1.02275	-27.6225	-70.5203	-107.785	-106.849
87.45	0.144341	3.12599	2.31769	2.54863	-27.0122	-69.2996	-112.973	-109.9
87.5	3.1961	1.60011	-1.03925	3.76933	-25.1811	-66.8582	-113.278	-108.985
87.55	-0.466011	2.82082	-1.6496	2.24345	-28.5381	-70.5203	-110.837	-108.375
87.6	3.50127	5.87257	1.70734	0.107224	-27.0122	-68.9945	-112.057	-107.154
87.65	-0.466011	3.43117	-0.73407	0.412399	-25.1811	-65.6375	-113.278	-106.238
87.7	0.144341	1.90529	-0.428894	3.46416	-27.6225	-69.91	-112.362	-108.985
87.75	-1.38154	2.21046	2.01251	-0.197952	-24.2656	-68.9945	-108.7	-111.121
87.8	-1.38154	4.95705	3.23321	-1.11348	-26.4018	-66.5531	-111.142	-111.426
87.85	-0.771187	2.21046	-0.123718	1.32793	-26.0967	-69.91	-111.752	-109.9
87.9	-2.60224	0.074234	1.09699	4.07451	-23.9604	-70.5203	-110.837	-110.816
87.95	-0.771187	0.989761	3.84357	0.107224	-26.0967	-69.6048	-107.785	-112.647
88	-1.99189	3.43117	0.486633	-0.197952	-22.1294	-69.6048	-109.311	-111.426
88.05	2.28057	3.12599	0.181458	2.24345	-25.7915	-71.7411	-111.752	-108.375
88.1	-2.60224	0.989761	3.53839	4.68486	-23.3501	-71.4359	-110.226	-111.121
88.15	1.05987	1.29494	0.486633	1.02275	-26.0967	-69.6048	-108.09	-108.985
88.2	-1.99189	2.82082	-0.123718	1.32793	-23.6553	-72.6566	-110.531	-105.323
88.25	0.449516	4.95705	0.791809	2.24345	-27.0122	-72.3514	-111.752	-109.595
88.3	-0.160835	0.989761	2.62286	4.07451	-25.7915	-69.91	-111.447	-108.375
88.35	-1.07636	0.989761	-0.73407	1.93828	-27.6225	-72.6566	-107.785	-109.29
88.4	0.754692	1.29494	-0.123718	1.32793	-26.4018	-74.1825	-108.395	-109.9
88.45	-1.07636	4.65187	3.23321	3.15898	-26.4018	-72.6566	-110.226	-106.238
88.5	2.89092	2.21046	0.181458	3.15898	-27.0122	-71.1307	-108.395	-112.037
88.55	-1.68671	0.37941	-0.123718	0.107224	-25.1811	-74.7928	-106.259	-109.9
88.6	-0.160835	1.29494	0.181458	-1.11348	-25.1811	-74.4876	-104.733	-109.595
88.65	1.05987	3.43117	0.791809	2.24345	-23.0449	-70.8255	-108.09	-110.511
88.7	0.754692	3.12599	-2.56513	-0.197952	-25.4863	-70.5203	-106.564	-107.154
88.75	4.4168	-0.230942	-1.34442	-0.808304	-22.1294	-72.9618	-106.259	-110.816
88.8	-0.160835	-0.536118	0.791809	2.54863	-25.7915	-71.1307	-102.597	-107.154
88.85	1.9754	0.37941	0.791809	-2.02901	-21.2138	-68.0789	-107.174	-109.595
88.9	2.28057	2.82082	-0.428894	1.02275	-24.876	-71.1307	-107.174	-109.29
88.95	-0.466011	1.90529	1.40216	1.02275	-22.7397	-69.6048	-105.649	-107.154
89	1.9754	-0.841293	5.67462	-0.503128	-25.1811	-67.7738	-103.512	-108.375
89.05	0.754692	0.989761	2.92804	3.76933	-23.6553	-65.3324	-104.123	-104.102
89.1	0.449516	3.73634	2.92804	-0.808304	-22.7397	-67.1634	-107.48	-109.595
89.15	4.11163	2.21046	3.84357	3.76933	-26.707	-66.2479	-106.259	-108.069
89.2	-0.771187	0.074234	5.36945	0.107224	-23.0449	-63.8065	-106.869	-108.069
89.25	0.449516	2.51564	1.09699	3.15898	-27.6225	-63.5013	-105.343	-110.816
89.3	1.9754	2.82082	0.791809	0.717575	-26.0967	-65.9427	-107.48	-108.985
89.35	0.449516	1.29494	2.01251	2.85381	-27.9277	-65.0272	-110.226	-113.868
89.4	3.1961	4.3467	3.23321	1.93828	-28.2329	-63.8065	-108.7	-114.783
89.45	0.449516	1.60011	1.09699	2.54863	-23.0449	-66.8582	-108.395	-111.426
89.5	0.754692	2.21046	0.791809	1.6331	-26.707	-68.3841	-105.649	-115.394
89.55	4.11163	4.95705	2.62286	2.85381	-24.5708	-68.9945	-108.09	-113.563
89.6	-0.771187	0.989761	3.53839	1.6331	-26.707	-68.3841	-109.311	-112.342
89.65	0.449516	4.04152	0.791809	1.32793	-26.707	-70.2152	-106.564	-113.563
89.7	4.11163	1.60011	0.791809	0.107224	-22.4345	-72.0462	-106.564	-110.206
89.75	0.449516	3.43117	2.01251	1.6331	-26.0967	-71.7411	-104.733	-110.816
89.8	0.754692	0.989761	3.23321	0.107224	-23.9604	-69.91	-106.564	-111.121
89.85	2.89092	1.90529	-0.428894	1.32793	-24.5708	-71.7411	-107.48	-107.764
89.9	0.144341	1.29494	-0.123718	-0.503128	-24.2656	-73.2669	-106.564	-108.68
89.95	1.67022	1.29494	1.09699	2.24345	-20.2983	-72.0462	-105.038	-110.816
90	1.67022	2.82082	4.75909	0.717575	-25.4863	-68.6893	-100.766	-109.29
90.05	-1.07636	0.684586	2.31769	0.412399	-23.0449	-68.6893	-102.292	-110.816
90.1	1.67022	2.82082	2.62286	-0.808304	-22.4345	-70.2152	-105.954	-113.563
90.15	2.28057	1.29494	3.84357	0.717575	-24.5708	-67.7738	-105.343	-112.037
90.2	0.144341	3.43117	5.9798	1.32793	-22.4345	-65.6375	-105.038	-114.173
90.25	2.58575	-0.536118	3.84357	0.717575	-24.2656	-65.3324	-104.428	-116.004
90.3	2.58575	4.65187	2.01251	2.24345	-24.876	-68.0789	-104.428	-113.563
90.35	0.754692	0.989761	1.70734	-0.503128	-21.8242	-67.4686	-108.09	-113.257
90.4	3.50127	4.65187	3.84357	3.46416	-27.0122	-67.4686	-109.921	-114.478
90.45	2.28057	-0.841293	3.53839	0.717575	-26.4018	-65.6375	-109.616	-113.257
90.5	-0.466011	2.82082	0.181458	4.99004	-24.5708	-68.0789	-108.7	-110.206
90.55	1.36504	-0.841293	-0.428894	0.107224	-27.9277	-69.6048	-107.48	-112.952
90.6	0.449516	0.989761	1.09699	4.07451	-27.3174	-68.0789	-110.531	-112.952
90.65	-2.60224	0.074234	3.53839	1.32793	-27.3174	-67.1634	-112.362	-110.206
90.7	-0.771187	0.074234	0.181458	1.6331	-28.5381	-65.6375	-111.752	-113.563
90.75	-1.38154	2.21046	-1.03925	3.15898	-25.1811	-68.6893	-109.921	-113.257
90.8	-3.82294	0.37941	-0.123718	0.412399	-28.2329	-68.6893	-110.837	-110.511
90.85	-2.90742	4.95705	2.01251	4.37968	-28.5381	-68.0789	-112.057	-112.647
90.9	-1.68671	1.29494	3.23321	-0.503128	-24.5708	-65.0272	-109.921	-111.426
90.95	-4.12812	3.43117	-0.428894	2.54863	-28.8432	-66.2479	-108.7	-108.68
91	-2.90742	2.21046	-0.73407	0.717575	-27.9277	-67.4686	-110.837	-110.511
91.05	-1.07636	1.90529	0.181458	0.107224	-25.1811	-65.9427	-106.869	-112.342
91.1	-4.4333	4.04152	2.62286	2.54863	-28.2329	-66.2479	-107.174	-108.985
91.15	-2.60224	-0.230942	3.84357	0.412399	-27.0122	-62.5858	-108.395	-107.764
91.2	1.9754	3.12599	1.09699	4.37968	-24.5708	-64.4168	-104.123	-111.426
91.25	-2.29707	-0.841293	1.09699	0.412399	-28.8432	-66.8582	-107.785	-110.816
91.3	-2.29707	-0.230942	1.40216	2.85381	-27.3174	-68.0789	-106.564	-106.543
91.35	-0.160835	2.82082	3.23321	3.46416	-24.2656	-68.3841	-105.343	-108.985
91.4	-1.68671	-1.14647	4.14874	1.6331	-27.3174	-65.3324	-107.48	-109.9
91.45	-3.21259	1.90529	2.01251	5.60039	-25.4863	-67.1634	-103.207	-108.375
91.5	-1.68671	-0.230942	0.486633	2.24345	-24.5708	-69.2996	-107.48	-108.069
91.55	-0.771187	-2.062	1.40216	3.15898	-26.707	-69.6048	-103.818	-111.121
91.6	-3.82294	3.12599	2.62286	4.37968	-24.2656	-68.3841	-108.395	-110.511
91.65	-1.68671	-0.536118	3.23321	2.54863	-24.876	-66.5531	-107.174	-108.985
91.7	1.05987	1.29494	0.791809	6.51591	-26.707	-65.6375	-109.921	-110.511
91.75	-2.90742	1.60011	-0.428894	1.32793	-24.876	-67.7738	-110.226	-112.037
91.8	-1.99189	1.29494	-0.123718	2.85381	-24.876	-68.9945	-110.531	-110.511
91.85	0.754692	4.95705	0.181458	3.15898	-27.6225	-68.6893	-111.752	-108.68
91.9	-1.07636	2.51564	2.92804	1.02275	-26.4018	-67.4686	-108.7	-111.426
91.95	-2.90742	3.43117	2.62286	4.68486	-25.1811	-65.9427	-112.973	-110.206
92	-1.07636	5.26222	-0.428894	1.32793	-26.707	-66.8582	-108.395	-107.459
92.05	1.05987	1.60011	-1.34442	3.46416	-26.707	-69.91	-111.447	-106.849
92.1	-3.51777	3.73634	0.791809	5.29521	-23.6553	-69.2996	-108.7	-108.68
92.15	-2.90742	4.04152	2.01251	2.54863	-27.3174	-69.6048	-108.7	-107.154
92.2	0.449516	1.60011	5.36945	6.82109	-25.4863	-66.8582	-110.226	-104.102
92.25	0.449516	5.26222	3.53839	2.85381	-22.4345	-64.722	-106.259	-106.543
92.3	-2.29707	2.82082	1.70734	2.85381	-26.4018	-65.6375	-109.616	-108.375
92.35	-1.07636	1.90529	1.70734	5.60039	-26.707	-68.6893	-106.259	-107.154
92.4	1.9754	5.26222	3.23321	1.32793	-22.7397	-68.6893	-108.09	-104.407
92.45	1.05987	0.684586	2.62286	2.24345	-26.4018	-65.9427	-107.48	-107.764
92.5	0.449516	0.684586	4.75909	2.54863	-27.6225	-64.722	-102.902	-109.595
92.55	1.36504	2.51564	4.14874	0.412399	-25.1811	-62.5858	-106.869	-110.206
92.6	2.58575	-1.45165	1.40216	3.46416	-25.4863	-61.6703	-103.512	-105.933
92.65	-0.466011	1.29494	-0.73407	1.6331	-27.3174	-63.8065	-103.207	-110.206
92.7	0.449516	3.12599	-1.6496	1.32793	-26.4018	-64.722	-103.207	-112.647
92.75	1.36504	0.989761	1.70734	6.21074	-23.9604	-64.4168	-100.461	-111.121
92.8	1.67022	2.82082	0.181458	0.717575	-28.2329	-65.3324	-101.376	-108.68
92.85	-1.38154	4.3467	-2.8703	1.93828	-26.707	-64.722	-102.902	-110.816
92.9	-0.771187	2.82082	-2.56513	4.99004	-24.2656	-63.1961	-98.0192	-113.257
92.95	1.36504	4.3467	1.09699	1.32793	-27.0122	-65.0272	-102.292	-112.952
93	0.144341	3.12599	-1.95477	2.54863	-27.3174	-67.1634	-101.071	-109.9
93.05	-0.466011	1.60011	-1.6496	1.6331	-25.1811	-67.4686	-100.461	-111.426
93.1	-0.160835	3.73634	2.62286	1.6331	-24.5708	-66.8582	-103.818	-113.868
93.15	1.9754	1.60011	-1.34442	4.07451	-27.6225	-66.5531	-101.071	-113.257
93.2	0.754692	0.684586	-1.03925	0.717575	-27.6225	-66.2479	-101.071	-110.511
93.25	-0.771187	3.73634	2.01251	0.717575	-23.9604	-65.0272	-104.123	-109.595
93.3	0.144341	2.21046	-1.34442	4.07451	-27.3174	-68.3841	-101.376	-111.121
93.35	3.1961	1.29494	0.486633	-0.503128	-28.2329	-68.0789	-102.597	-109.595
93.4	1.67022	3.73634	0.791809	0.107224	-26.0967	-68.3841	-103.207	-108.68
93.45	-0.160835	2.82082	-0.428894	2.85381	-24.2656	-64.4168	-102.597	-105.018
93.5	1.05987	1.60011	2.62286	-1.41865	-27.0122	-67.4686	-103.207	-106.543
93.55	2.28057	3.43117	-0.73407	-0.503128	-26.707	-66.8582	-105.343	-108.375
93.6	2.89092	3.12599	2.01251	3.15898	-23.3501	-65.3324	-101.681	-108.375
93.65	-1.07636	0.989761	-1.03925	-1.41865	-24.2656	-64.4168	-104.123	-107.764
93.7	-0.466011	3.73634	-1.95477	0.717575	-23.6553	-65.6375	-105.343	-106.849
93.75	1.05987	3.43117	-0.123718	3.46416	-22.1294	-64.1117	-103.207	-112.037
93.8	1.36504	0.989761	-2.56513	1.02275	-19.9931	-63.8065	-105.954	-113.257
93.85	-1.07636	1.90529	0.791809	1.32793	-23.0449	-66.2479	-107.174	-112.647
93.9	-2.60224	3.43117	-4.091	4.07451	-22.7397	-64.4168	-105.649	-110.816
93.95	-0.160835	1.29494	-2.25995	0.717575	-21.8242	-67.1634	-109.616	-111.731
94	0.144341	1.29494	-2.56513	0.717575	-20.9087	-67.4686	-110.226	-114.173
94.05	-0.466011	4.65187	-2.25995	2.24345	-25.1811	-65.0272	-109.311	-111.731
94.1	-1.99189	0.37941	0.791809	-2.33418	-25.4863	-69.2996	-111.752	-112.037
94.15	-1.07636	0.684586	-2.25995	-2.02901	-23.9604	-65.0272	-113.278	-108.985
94.2	0.144341	3.43117	1.09699	1.93828	-23.9604	-66.8582	-110.837	-110.206
94.25	1.36504	0.074234	-2.25995	-2.33418	-26.707	-66.8582	-111.142	-112.037
94.3	-1.07636	0.074234	-2.25995	-1.11348	-26.4018	-63.5013	-112.973	-111.121
94.35	-1.68671	2.82082	1.40216	3.46416	-23.6553	-65.0272	-110.531	-110.206
94.4	-1.38154	2.21046	-2.8703	-0.197952	-24.2656	-61.3651	-108.09	-107.459
94.45	0.449516	-1.14647	-0.123718	0.412399	-27.0122	-65.6375	-109.921	-105.628
94.5	1.67022	0.37941	0.791809	3.76933	-26.0967	-64.4168	-107.785	-106.543
94.55	-0.466011	2.21046	-1.6496	1.32793	-23.6553	-63.1961	-104.733	-106.238
94.6	-0.771187	-0.841293	2.01251	1.02275	-23.3501	-64.722	-108.7	-105.933
94.65	1.05987	-0.536118	-1.34442	3.15898	-26.707	-61.9754	-107.785	-104.407
94.7	3.1961	2.51564	-1.34442	0.717575	-25.4863	-66.5531	-103.207	-102.576
94.75	3.1961	0.989761	0.791809	0.107224	-23.9604	-63.8065	-107.785	-106.238
94.8	0.144341	1.60011	-3.48065	1.6331	-22.4345	-65.0272	-106.564	-108.069
94.85	-0.771187	2.82082	-2.8703	3.15898	-26.0967	-67.4686	-103.512	-108.375
94.9	0.144341	4.3467	0.791809	0.412399	-26.4018	-62.2806	-104.123	-107.459
94.95	2.89092	1.90529	-2.25995	1.32793	-25.1811	-67.4686	-105.954	-105.933
95	2.28057	2.51564	-0.73407	4.99004	-22.1294	-66.2479	-104.733	-107.764
95.05	-1.07636	4.95705	2.92804	2.24345	-23.9604	-63.5013	-102.597	-110.816
95.1	0.144341	2.82082	-0.73407	1.32793	-25.1811	-67.4686	-106.869	-110.206
95.15	2.89092	1.60011	-0.73407	4.37968	-23.3501	-65.6375	-107.785	-110.206
95.2	4.11163	1.90529	3.23321	4.68486	-21.519	-64.722	-105.649	-108.68
95.25	0.449516	3.12599	0.486633	2.85381	-21.2138	-66.2479	-106.564	-107.764
95.3	0.144341	-0.230942	2.01251	4.37968	-24.2656	-64.722	-108.09	-108.985
95.35	1.36504	-1.14647	4.75909	6.21074	-23.0449	-64.722	-107.174	-110.816
95.4	-0.771187	0.684586	0.791809	1.6331	-22.7397	-66.2479	-106.564	-112.037
95.45	-2.60224	0.684586	0.486633	1.93828	-19.9931	-62.5858	-108.7	-111.121
95.5	0.144341	-2.67235	4.45392	4.68486	-23.6553	-64.4168	-107.48	-110.511
95.55	-2.90742	-1.14647	0.181458	1.93828	-23.6553	-65.9427	-103.818	-107.764
95.6	-3.21259	2.21046	-0.73407	0.717575	-24.2656	-62.891	-104.123	-107.764
95.65	0.144341	-0.230942	2.92804	2.24345	-21.8242	-65.0272	-103.818	-109.29
95.7	-3.21259	-1.45165	0.181458	5.60039	-25.4863	-65.6375	-101.376	-109.9
95.75	-0.160835	-0.841293	-0.428894	0.412399	-26.0967	-64.1117	-96.4933	-108.375
95.8	-1.99189	3.43117	1.40216	1.6331	-25.1811	-65.9427	-98.6295	-108.375
95.85	-1.07636	0.37941	0.181458	3.46416	-24.5708	-67.4686	-98.0192	-108.68
95.9	-0.466011	-0.230942	-0.73407	4.37968	-27.3174	-66.5531	-96.7985	-107.459
95.95	-1.38154	0.684586	0.791809	-0.197952	-26.4018	-67.1634	-96.4933	-109.29
96	1.9754	4.65187	0.791809	0.107224	-25.1811	-69.2996	-101.071	-111.121
96.05	-1.68671	1.60011	-1.95477	2.85381	-27.0122	-67.4686	-101.681	-110.511
96.1	1.9754	1.29494	1.40216	0.107224	-23.6553	-65.6375	-99.545	-107.459
96.15	-3.51777	2.51564	2.92804	-1.72383	-27.9277	-69.2996	-100.155	-105.323
96.2	1.67022	4.65187	-0.73407	0.412399	-25.1811	-69.2996	-103.512	-108.985
96.25	-2.60224	2.51564	-0.73407	3.46416	-24.876	-65.6375	-103.207	-107.459
96.3	0.144341	1.60011	1.40216	0.412399	-27.6225	-68.6893	-98.6295	-105.628
96.35	-1.99189	1.60011	-1.34442	0.412399	-23.6553	-69.2996	-100.461	-106.849
96.4	-1.07636	4.3467	-1.6496	2.54863	-27.0122	-66.2479	-103.207	-107.764
96.45	-0.466011	1.60011	-0.123718	4.37968	-22.7397	-68.3841	-101.681	-105.628
96.5	-1.99189	0.074234	-0.73407	1.93828	-27.3174	-69.6048	-99.8502	-108.069
96.55	1.05987	-0.536118	-3.17548	1.32793	-23.6553	-70.2152	-101.986	-107.459
96.6	-0.466011	1.29494	-2.25995	2.54863	-27.3174	-70.5203	-103.818	-103.187
96.65	1.67022	1.90529	0.181458	4.37968	-24.2656	-73.8773	-104.123	-105.018
96.7	-1.99189	-0.841293	-2.56513	1.32793	-27.9277	-74.1825	-102.902	-103.492
96.75	0.449516	-0.536118	-2.56513	1.93828	-26.0967	-71.7411	-105.343	-101.966
96.8	-1.99189	1.29494	0.181458	2.85381	-27.6225	-75.7083	-107.48	-102.271
96.85	-1.99189	3.43117	0.181458	4.68486	-26.0967	-75.098	-107.785	-97.6934
96.9	0.754692	0.684586	-1.6496	0.412399	-27.9277	-72.3514	-105.038	-102.881
96.95	-4.12812	0.074234	-1.34442	1.32793	-28.2329	-72.9618	-105.343	-101.355
97	1.05987	0.074234	2.62286	3.15898	-28.5381	-75.4032	-107.785	-101.355
97.05	-2.29707	1.90529	-1.34442	1.32793	-28.5381	-72.6566	-108.7	-104.102
97.1	-0.466011	2.82082	-1.95477	1.93828	-25.1811	-67.7738	-105.649	-101.966
97.15	-0.466011	-0.230942	0.486633	4.99004	-27.3174	-70.8255	-103.207	-106.543
97.2	-1.99189	0.074234	1.40216	0.107224	-24.2656	-70.8255	-105.954	-104.407
97.25	2.28057	1.29494	-2.56513	1.6331	-27.3174	-68.9945	-105.954	-106.849
97.3	-1.38154	3.43117	-2.56513	4.37968	-22.7397	-67.7738	-105.649	-106.849
97.35	-0.771187	0.37941	-0.123718	1.02275	-27.9277	-70.8255	-101.071	-103.797
97.4	1.36504	-1.14647	0.791809	4.07451	-25.1811	-71.7411	-104.733	-106.238
97.45	-1.68671	0.989761	-1.95477	-0.503128	-27.0122	-68.9945	-107.785	-103.187
97.5	0.449516	2.51564	-0.73407	2.54863	-27.0122	-71.1307	-106.869	-106.849
97.55	-0.160835	-0.536118	-0.123718	0.412399	-24.2656	-73.2669	-104.733	-105.933
97.6	-1.38154	-0.536118	0.791809	1.32793	-27.3174	-73.8773	-103.207	-103.797
97.65	1.9754	2.51564	-2.25995	1.6331	-22.7397	-70.2152	-106.259	-106.238
97.7	-2.60224	-0.536118	-2.56513	0.717575	-26.0967	-73.2669	-106.869	-104.102
97.75	-2.29707	1.29494	0.791809	1.32793	-24.876	-73.5721	-107.48	-105.933
97.8	-0.160835	0.074234	-1.03925	1.32793	-23.9604	-72.9618	-104.428	-106.543
97.85	-3.82294	-2.062	-2.8703	1.02275	-24.876	-69.6048	-104.123	-101.05
97.9	-1.68671	2.82082	-2.8703	0.412399	-20.9087	-71.7411	-108.09	-106.543
97.95	-1.07636	-1.45165	-1.03925	1.93828	-24.876	-70.5203	-107.48	-106.849
98	-4.12812	2.21046	-1.95477	1.6331	-24.2656	-69.6048	-105.954	-103.797
98.05	-0.160835	0.37941	-4.70136	1.02275	-22.4345	-66.2479	-102.292	-107.764
98.1	-1.38154	0.989761	-4.091	-0.197952	-23.6553	-69.2996	-102.597	-106.238
98.15	-2.60224	3.12599	-2.25995	1.6331	-21.2138	-68.3841	-104.123	-104.102
98.2	0.449516	2.21046	-1.34442	0.107224	-23.0449	-67.1634	-103.207	-107.459
98.25	-2.60224	4.04152	-4.39618	1.32793	-23.3501	-65.3324	-101.986	-104.712
98.3	-2.29707	1.90529	-4.39618	1.02275	-21.2138	-67.7738	-100.155	-103.492
98.35	0.449516	5.26222	-1.95477	2.85381	-25.4863	-68.0789	-101.986	-107.154
98.4	-3.51777	1.90529	-1.03925	2.54863	-23.6553	-67.4686	-104.733	-106.543
98.45	-3.51777	3.73634	-4.70136	3.76933	-24.5708	-65.9427	-105.343	-104.407
98.5	0.144341	0.37941	-4.70136	1.6331	-26.4018	-68.3841	-105.649	-107.459
98.55	-2.60224	4.3467	-4.70136	3.76933	-22.4345	-68.9945	-103.512	-105.933
98.6	-1.68671	-0.536118	-2.25995	1.02275	-27.3174	-67.7738	-101.681	-103.797
98.65	1.05987	2.82082	-3.48065	3.46416	-27.9277	-65.6375	-104.123	-106.849
98.7	-2.60224	-1.45165	-4.70136	-0.197952	-23.9604	-66.2479	-103.818	-104.712
98.75	-0.160835	3.43117	-5.61688	4.07451	-27.9277	-67.1634	-103.512	-102.271
98.8	2.89092	1.29494	-2.56513	-0.808304	-26.4018	-66.5531	-102.292	-107.764
98.85	-0.160835	2.21046	-1.95477	3.15898	-26.707	-65.0272	-99.8502	-106.543
98.9	1.05987	0.989761	-4.091	0.107224	-27.6225	-65.3324	-101.681	-102.881
98.95	4.11163	0.989761	-4.39618	1.02275	-24.5708	-67.7738	-104.123	-105.933
99	0.144341	4.04152	-4.091	2.24345	-27.0122	-68.6893	-104.733	-105.933
99.05	0.144341	0.684586	-0.123718	1.02275	-27.9277	-68.9945	-102.902	-102.271
99.1	3.50127	4.95705	-0.73407	5.29521	-24.5708	-66.5531	-104.123	-104.102
99.15	0.449516	-0.230942	-2.56513	1.6331	-28.2329	-67.7738	-108.09	-104.102
99.2	0.449516	2.21046	-1.6496	6.51591	-27.6225	-69.6048	-107.174	-103.187
99.25	3.50127	1.60011	0.791809	3.46416	-25.4863	-68.9945	-103.818	-102.881
99.3	-0.466011	0.37941	2.62286	3.15898	-28.8432	-68.0789	-108.395	-103.492
99.35	1.67022	3.73634	0.486633	3.46416	-26.707	-66.2479	-108.7	-102.576
99.4	5.94268	0.37941	-1.6496	2.24345	-24.5708	-69.2996	-106.869	-100.745
99.45	1.67022	3.73634	-1.03925	6.82109	-28.2329	-70.2152	-109.921	-105.933
99.5	2.58575	-0.230942	-0.73407	1.6331	-26.707	-69.6048	-107.48	-104.102
99.55	4.4168	0.37941	1.70734	3.76933	-27.0122	-67.1634	-108.7	-101.661
99.6	1.36504	4.04152	-0.123718	2.54863	-29.7588	-65.6375	-109.005	-104.712
99.65	1.05987	0.37941	-2.25995	2.24345	-28.8432	-67.1634	-105.038	-104.407
99.7	2.58575	4.04152	-1.95477	5.60039	-29.7588	-68.6893	-108.09	-101.966
99.75	2.28057	1.29494	-1.34442	1.02275	-30.0639	-67.1634	-104.123	-100.44
99.8	0.754692	1.90529	-0.73407	2.24345	-28.2329	-65.6375	-108.09	-102.576
99.85	2.58575	4.65187	-1.95477	1.32793	-28.8432	-63.8065	-106.259	-102.271
99.9	3.80645	0.37941	-3.48065	0.717575	-30.3691	-67.1634	-104.428	-98.6089
[truncated: 3,161 more rows]

## Sheet: Figure 1e
Figure 1-source data 5 apical	Apical			Curve fit			Steady-state displacement response plots fitted with a one-state Boltzmann function									Figure 1-source data 6 base	Base								Po	X
Disp (um)	mean	se		Apex X	Po		Data for apical (left) and basal (right)									Disp(um)	mean	sem =15							0	0.0377373
0	0.00852	5.0176e-06		0	0.00537717											0	0.03691	0							0.001001	0.037754
0.141	0.0129	3.54025e-05		0.001001	0.0054385											0.141	0.08205	0.0120385							0.002002	0.0377711
0.285	0.16719	2.18089e-05		0.002002	0.00550059											0.285	0.26636	0.0130668							0.003003	0.0377885
0.427	0.49039	2.93764e-05		0.003003	0.00556345											0.427	0.79323	0.0110691							0.004004	0.0378062
0.568	0.8673	5.56516e-05		0.004004	0.00562709											0.568	1	0.0113359							0.00500501	0.0378243
0.71	1	0.0344919		0.00500501	0.00569152											0.71	0.9983	0.05058							0.00600601	0.0378428
0.852	0.994039	0.0545089		0.00600601	0.00575675											0.852	1	0.113057							0.00700701	0.0378616
1	1	0		0.00700701	0.00582279											1	1	0.10551							0.00800801	0.0378809
				0.00800801	0.00588965																				0.00900901	0.0379005
				0.00900901	0.00595734																				0.01001	0.0379205
				0.01001	0.00602587																				0.011011	0.0379409
				0.011011	0.00609525																				0.012012	0.0379617
				0.012012	0.00616548																				0.013013	0.037983
				0.013013	0.00623659																				0.014014	0.0380046
				0.014014	0.00630858																				0.015015	0.0380267
				0.015015	0.00638146																				0.016016	0.0380493
				0.016016	0.00645525																				0.017017	0.0380723
				0.017017	0.00652995																				0.018018	0.0380958
				0.018018	0.00660557																				0.019019	0.0381197
				0.019019	0.00668213																				0.02002	0.0381442
				0.02002	0.00675964																				0.021021	0.0381691
				0.021021	0.00683811																				0.022022	0.0381945
				0.022022	0.00691755																				0.023023	0.0382205
				0.023023	0.00699797																				0.024024	0.0382469
				0.024024	0.00707939																				0.025025	0.0382739
				0.025025	0.00716181																				0.026026	0.0383015
				0.026026	0.00724526																				0.027027	0.0383295
				0.027027	0.00732974																				0.028028	0.0383582
				0.028028	0.00741526																				0.029029	0.0383875
				0.029029	0.00750184																				0.03003	0.0384173
				0.03003	0.00758949																				0.031031	0.0384477
				0.031031	0.00767822																				0.032032	0.0384788
				0.032032	0.00776805																				0.033033	0.0385104
				0.033033	0.00785899																				0.034034	0.0385427
				0.034034	0.00795106																				0.035035	0.0385757
				0.035035	0.00804426																				0.036036	0.0386093
				0.036036	0.00813861																				0.037037	0.0386436
				0.037037	0.00823412																				0.038038	0.0386786
				0.038038	0.00833082																				0.039039	0.0387143
				0.039039	0.00842871																				0.04004	0.0387507
				0.04004	0.0085278																				0.041041	0.0387879
				0.041041	0.00862812																				0.042042	0.0388258
				0.042042	0.00872968																				0.043043	0.0388644
				0.043043	0.00883249																				0.044044	0.0389039
				0.044044	0.00893657																				0.045045	0.0389441
				0.045045	0.00904193																				0.046046	0.0389852
				0.046046	0.00914858																				0.047047	0.039027
				0.047047	0.00925656																				0.048048	0.0390697
				0.048048	0.00936586																				0.049049	0.0391133
				0.049049	0.00947651																				0.0500501	0.0391578
				0.0500501	0.00958852																				0.0510511	0.0392031
				0.0510511	0.00970191																				0.0520521	0.0392494
				0.0520521	0.00981669																				0.0530531	0.0392966
				0.0530531	0.00993289																				0.0540541	0.0393447
				0.0540541	0.0100505																				0.0550551	0.0393938
				0.0550551	0.0101696																				0.0560561	0.0394439
				0.0560561	0.0102901																				0.0570571	0.039495
				0.0570571	0.0104121																				0.0580581	0.0395471
				0.0580581	0.0105357																				0.0590591	0.0396003
				0.0590591	0.0106607																				0.0600601	0.0396546
				0.0600601	0.0107873																				0.0610611	0.0397099
				0.0610611	0.0109154																				0.0620621	0.0397663
				0.0620621	0.0110451																				0.0630631	0.0398239
				0.0630631	0.0111764																				0.0640641	0.0398827
				0.0640641	0.0113093																				0.0650651	0.0399426
				0.0650651	0.0114438																				0.0660661	0.0400037
				0.0660661	0.01158																				0.0670671	0.0400661
				0.0670671	0.0117179																				0.0680681	0.0401297
				0.0680681	0.0118574																				0.0690691	0.0401946
				0.0690691	0.0119987																				0.0700701	0.0402608
				0.0700701	0.0121416																				0.0710711	0.0403283
				0.0710711	0.0122864																				0.0720721	0.0403972
				0.0720721	0.0124329																				0.0730731	0.0404674
				0.0730731	0.0125812																				0.0740741	0.0405391
				0.0740741	0.0127313																				0.0750751	0.0406122
				0.0750751	0.0128833																				0.0760761	0.0406868
				0.0760761	0.0130371																				0.0770771	0.0407628
				0.0770771	0.0131927																				0.0780781	0.0408404
				0.0780781	0.0133503																				0.0790791	0.0409196
				0.0790791	0.0135099																				0.0800801	0.0410003
				0.0800801	0.0136713																				0.0810811	0.0410827
				0.0810811	0.0138348																				0.0820821	0.0411667
				0.0820821	0.0140002																				0.0830831	0.0412524
				0.0830831	0.0141676																				0.0840841	0.0413398
				0.0840841	0.0143371																				0.0850851	0.0414289
				0.0850851	0.0145087																				0.0860861	0.0415199
				0.0860861	0.0146823																				0.0870871	0.0416126
				0.0870871	0.0148581																				0.0880881	0.0417072
				0.0880881	0.015036																				0.0890891	0.0418038
				0.0890891	0.0152161																				0.0900901	0.0419022
				0.0900901	0.0153983																				0.0910911	0.0420026
				0.0910911	0.0155828																				0.0920921	0.042105
				0.0920921	0.0157695																				0.0930931	0.0422095
				0.0930931	0.0159585																				0.0940941	0.0423161
				0.0940941	0.0161498																				0.0950951	0.0424248
				0.0950951	0.0163434																				0.0960961	0.0425357
				0.0960961	0.0165394																				0.0970971	0.0426487
				0.0970971	0.0167377																				0.0980981	0.0427641
				0.0980981	0.0169385																				0.0990991	0.0428817
				0.0990991	0.0171416																				0.1001	0.0430017
				0.1001	0.0173473																				0.101101	0.0431241
				0.101101	0.0175554																				0.102102	0.0432489
				0.102102	0.0177661																				0.103103	0.0433763
				0.103103	0.0179793																				0.104104	0.0435061
				0.104104	0.0181951																				0.105105	0.0436386
				0.105105	0.0184135																				0.106106	0.0437737
				0.106106	0.0186345																				0.107107	0.0439115
				0.107107	0.0188582																				0.108108	0.044052
				0.108108	0.0190846																				0.109109	0.0441953
				0.109109	0.0193138																				0.11011	0.0443415
				0.11011	0.0195457																				0.111111	0.0444906
				0.111111	0.0197804																				0.112112	0.0446427
				0.112112	0.0200179																				0.113113	0.0447978
				0.113113	0.0202583																				0.114114	0.0449559
				0.114114	0.0205016																				0.115115	0.0451172
				0.115115	0.0207478																				0.116116	0.0452818
				0.116116	0.020997																				0.117117	0.0454496
				0.117117	0.0212492																				0.118118	0.0456207
				0.118118	0.0215044																				0.119119	0.0457952
				0.119119	0.0217627																				0.12012	0.0459732
				0.12012	0.0220241																				0.121121	0.0461547
				0.121121	0.0222886																				0.122122	0.0463398
				0.122122	0.0225563																				0.123123	0.0465286
				0.123123	0.0228272																				0.124124	0.0467211
				0.124124	0.0231013																				0.125125	0.0469175
				0.125125	0.0233787																				0.126126	0.0471177
				0.126126	0.0236595																				0.127127	0.0473219
				0.127127	0.0239436																				0.128128	0.0475301
				0.128128	0.0242311																				0.129129	0.0477424
				0.129129	0.024522																				0.13013	0.047959
				0.13013	0.0248164																				0.131131	0.0481798
				0.131131	0.0251143																				0.132132	0.048405
				0.132132	0.0254158																				0.133133	0.0486346
				0.133133	0.0257208																				0.134134	0.0488687
				0.134134	0.0260295																				0.135135	0.0491075
				0.135135	0.0263419																				0.136136	0.049351
				0.136136	0.026658																				0.137137	0.0495992
				0.137137	0.0269778																				0.138138	0.0498524
				0.138138	0.0273014																				0.139139	0.0501105
				0.139139	0.0276289																				0.14014	0.0503737
				0.14014	0.0279603																				0.141	0.0506039
				0.141	0.028248																				0.141141	0.0506421
				0.141141	0.0282956																				0.142142	0.0509157
				0.142142	0.0286348																				0.143143	0.0511948
				0.143143	0.0289781																				0.144144	0.0514792
				0.144144	0.0293254																				0.145145	0.0517693
				0.145145	0.0296768																				0.146146	0.0520651
				0.146146	0.0300324																				0.147147	0.0523666
				0.147147	0.0303922																				0.148148	0.0526741
				0.148148	0.0307562																				0.149149	0.0529875
				0.149149	0.0311245																				0.15015	0.0533071
				0.15015	0.0314972																				0.151151	0.0536329
				0.151151	0.0318742																				0.152152	0.0539651
				0.152152	0.0322557																				0.153153	0.0543037
				0.153153	0.0326416																				0.154154	0.054649
				0.154154	0.0330321																				0.155155	0.055001
				0.155155	0.0334271																				0.156156	0.0553598
				0.156156	0.0338268																				0.157157	0.0557256
				0.157157	0.0342312																				0.158158	0.0560985
				0.158158	0.0346403																				0.159159	0.0564786
				0.159159	0.0350541																				0.16016	0.0568662
				0.16016	0.0354728																				0.161161	0.0572612
				0.161161	0.0358964																				0.162162	0.0576638
				0.162162	0.0363249																				0.163163	0.0580743
				0.163163	0.0367584																				0.164164	0.0584927
				0.164164	0.037197																				0.165165	0.0589192
				0.165165	0.0376406																				0.166166	0.0593538
				0.166166	0.0380894																				0.167167	0.0597969
				0.167167	0.0385434																				0.168168	0.0602485
				0.168168	0.0390027																				0.169169	0.0607088
				0.169169	0.0394672																				0.17017	0.0611779
				0.17017	0.0399372																				0.171171	0.0616561
				0.171171	0.0404125																				0.172172	0.0621434
				0.172172	0.0408934																				0.173173	0.06264
				0.173173	0.0413798																				0.174174	0.0631461
				0.174174	0.0418718																				0.175175	0.0636619
				0.175175	0.0423695																				0.176176	0.0641876
				0.176176	0.0428729																				0.177177	0.0647232
				0.177177	0.043382																				0.178178	0.0652691
				0.178178	0.043897																				0.179179	0.0658254
				0.179179	0.0444179																				0.18018	0.0663922
				0.18018	0.0449448																				0.181181	0.0669698
				0.181181	0.0454777																				0.182182	0.0675583
				0.182182	0.0460167																				0.183183	0.0681579
				0.183183	0.0465618																				0.184184	0.0687689
				0.184184	0.0471131																				0.185185	0.0693914
				0.185185	0.0476707																				0.186186	0.0700257
				0.186186	0.0482346																				0.187187	0.0706719
				0.187187	0.0488049																				0.188188	0.0713302
				0.188188	0.0493817																				0.189189	0.0720009
				0.189189	0.049965																				0.19019	0.0726841
				0.19019	0.0505549																				0.191191	0.0733801
				0.191191	0.0511514																				0.192192	0.0740891
				0.192192	0.0517547																				0.193193	0.0748114
				0.193193	0.0523648																				0.194194	0.0755471
				0.194194	0.0529817																				0.195195	0.0762964
				0.195195	0.0536056																				0.196196	0.0770597
				0.196196	0.0542364																				0.197197	0.0778371
				0.197197	0.0548743																				0.198198	0.0786289
				0.198198	0.0555194																				0.199199	0.0794352
				0.199199	0.0561716																				0.2002	0.0802565
				0.2002	0.0568311																				0.201201	0.0810928
				0.201201	0.057498																				0.202202	0.0819445
				0.202202	0.0581723																				0.203203	0.0828117
				0.203203	0.058854																				0.204204	0.0836949
				0.204204	0.0595433																				0.205205	0.0845941
				0.205205	0.0602402																				0.206206	0.0855097
				0.206206	0.0609449																				0.207207	0.0864419
				0.207207	0.0616573																				0.208208	0.087391
				0.208208	0.0623775																				0.209209	0.0883573
				0.209209	0.0631057																				0.21021	0.089341
				0.21021	0.0638418																				0.211211	0.0903425
				0.211211	0.064586																				0.212212	0.0913619
				0.212212	0.0653384																				0.213213	0.0923996
				0.213213	0.066099																				0.214214	0.0934558
				0.214214	0.0668678																				0.215215	0.0945308
				0.215215	0.067645																				0.216216	0.095625
				0.216216	0.0684307																				0.217217	0.0967385
				0.217217	0.0692249																				0.218218	0.0978718
				0.218218	0.0700277																				0.219219	0.099025
				0.219219	0.0708391																				0.22022	0.100199
				0.22022	0.0716593																				0.221221	0.101393
				0.221221	0.0724883																				0.222222	0.102608
				0.222222	0.0733262																				0.223223	0.103844
				0.223223	0.0741731																				0.224224	0.105102
				0.224224	0.0750291																				0.225225	0.106381
				0.225225	0.0758942																				0.226226	0.107683
				0.226226	0.0767685																				0.227227	0.109007
				0.227227	0.0776521																				0.228228	0.110353
				0.228228	0.0785451																				0.229229	0.111723
				0.229229	0.0794476																				0.23023	0.113116
				0.23023	0.0803596																				0.231231	0.114533
				0.231231	0.0812812																				0.232232	0.115974
				0.232232	0.0822125																				0.233233	0.117439
				0.233233	0.0831535																				0.234234	0.118929
				0.234234	0.0841045																				0.235235	0.120444
				0.235235	0.0850653																				0.236236	0.121984
				0.236236	0.0860362																				0.237237	0.123549
				0.237237	0.0870172																				0.238238	0.125141
				0.238238	0.0880083																				0.239239	0.126758
				0.239239	0.0890098																				0.24024	0.128403
				0.24024	0.0900215																				0.241241	0.130074
				0.241241	0.0910437																				0.242242	0.131772
				0.242242	0.0920764																				0.243243	0.133498
				0.243243	0.0931197																				0.244244	0.135252
				0.244244	0.0941736																				0.245245	0.137034
				0.245245	0.0952383																				0.246246	0.138844
				0.246246	0.0963138																				0.247247	0.140683
				0.247247	0.0974003																				0.248248	0.142552
				0.248248	0.0984977																				0.249249	0.144449
				0.249249	0.0996062																				0.25025	0.146377
				0.25025	0.100726																				0.251251	0.148334
				0.251251	0.101857																				0.252252	0.150322
				0.252252	0.102999																				0.253253	0.152341
				0.253253	0.104153																				0.254254	0.15439
				0.254254	0.105318																				0.255255	0.156471
				0.255255	0.106494																				0.256256	0.158583
				0.256256	0.107683																				0.257257	0.160727
				0.257257	0.108883																				0.258258	0.162904
				0.258258	0.110094																				0.259259	0.165112
				0.259259	0.111318																				0.26026	0.167354
				0.26026	0.112554																				0.261261	0.169628
				0.261261	0.113801																				0.262262	0.171935
				0.262262	0.115061																				0.263263	0.174276
				0.263263	0.116333																				0.264264	0.176651
				0.264264	0.117617																				0.265265	0.17906
				0.265265	0.118914																				0.266266	0.181503
				0.266266	0.120223																				0.267267	0.18398
				0.267267	0.121545																				0.268268	0.186492
				0.268268	0.122879																				0.269269	0.189039
				0.269269	0.124225																				0.27027	0.191621
				0.27027	0.125585																				0.271271	0.194239
				0.271271	0.126957																				0.272272	0.196892
				0.272272	0.128342																				0.273273	0.199581
				0.273273	0.12974																				0.274274	0.202305
				0.274274	0.131152																				0.275275	0.205066
				0.275275	0.132576																				0.276276	0.207863
				0.276276	0.134013																				0.277277	0.210696
				0.277277	0.135464																				0.278278	0.213565
				0.278278	0.136928																				0.279279	0.216472
				0.279279	0.138405																				0.28028	0.219415
				0.28028	0.139896																				0.281281	0.222394
				0.281281	0.1414																				0.282282	0.225411
				0.282282	0.142918																				0.283283	0.228465
				0.283283	0.144449																				0.284284	0.231556
				0.284284	0.145994																				0.285	0.233788
				0.285	0.147107																				0.285285	0.234683
				0.285285	0.147553																				0.286286	0.237848
				0.286286	0.149126																				0.287287	0.24105
				0.287287	0.150712																				0.288288	0.244289
				0.288288	0.152313																				0.289289	0.247566
				0.289289	0.153927																				0.29029	0.250879
				0.29029	0.155556																				0.291291	0.25423
				0.291291	0.157199																				0.292292	0.257617
				0.292292	0.158856																				0.293293	0.261042
				0.293293	0.160527																				0.294294	0.264503
				0.294294	0.162212																				0.295295	0.268001
				0.295295	0.163912																				0.296296	0.271536
				0.296296	0.165626																				0.297297	0.275107
				0.297297	0.167355																				0.298298	0.278714
				0.298298	0.169098																				0.299299	0.282358
				0.299299	0.170855																				0.3003	0.286037
				0.3003	0.172627																				0.301301	0.289752
				0.301301	0.174414																				0.302302	0.293503
				0.302302	0.176215																				0.303303	0.297289
				0.303303	0.178031																				0.304304	0.30111
				0.304304	0.179862																				0.305305	0.304965
				0.305305	0.181708																				0.306306	0.308855
				0.306306	0.183568																				0.307307	0.312779
				0.307307	0.185443																				0.308308	0.316737
				0.308308	0.187333																				0.309309	0.320728
				0.309309	0.189238																				0.31031	0.324752
				0.31031	0.191158																				0.311311	0.328809
				0.311311	0.193093																				0.312312	0.332897
				0.312312	0.195043																				0.313313	0.337018
				0.313313	0.197008																				0.314314	0.341169
				0.314314	0.198987																				0.315315	0.345351
				0.315315	0.200982																				0.316316	0.349564
				0.316316	0.202992																				0.317317	0.353806
				0.317317	0.205017																				0.318318	0.358077
				0.318318	0.207057																				0.319319	0.362377
				0.319319	0.209112																				0.32032	0.366705
				0.32032	0.211182																				0.321321	0.37106
				0.321321	0.213267																				0.322322	0.375442
				0.322322	0.215367																				0.323323	0.37985
				0.323323	0.217482																				0.324324	0.384283
				0.324324	0.219613																				0.325325	0.388742
				0.325325	0.221758																				0.326326	0.393224
				0.326326	0.223919																				0.327327	0.39773
				0.327327	0.226094																				0.328328	0.402258
				0.328328	0.228285																				0.329329	0.406809
				0.329329	0.230491																				0.33033	0.41138
				0.33033	0.232711																				0.331331	0.415972
				0.331331	0.234947																				0.332332	0.420584
				0.332332	0.237198																				0.333333	0.425215
				0.333333	0.239463																				0.334334	0.429863
				0.334334	0.241744																				0.335335	0.434528
				0.335335	0.244039																				0.336336	0.43921
				0.336336	0.246349																				0.337337	0.443908
				0.337337	0.248674																				0.338338	0.44862
				0.338338	0.251014																				0.339339	0.453345
				0.339339	0.253369																				0.34034	0.458084
				0.34034	0.255738																				0.341341	0.462834
				0.341341	0.258122																				0.342342	0.467595
				0.342342	0.26052																				0.343343	0.472367
				0.343343	0.262933																				0.344344	0.477147
				0.344344	0.265361																				0.345345	0.481936
				0.345345	0.267802																				0.346346	0.486732
				0.346346	0.270259																				0.347347	0.491534
				0.347347	0.272729																				0.348348	0.496342
				0.348348	0.275214																				0.349349	0.501154
				0.349349	0.277713																				0.35035	0.50597
				0.35035	0.280226																				0.351351	0.510788
				0.351351	0.282753																				0.352352	0.515607
				0.352352	0.285293																				0.353353	0.520428
				0.353353	0.287848																				0.354354	0.525248
				0.354354	0.290417																				0.355355	0.530066
				0.355355	0.292999																				0.356356	0.534882
				0.356356	0.295594																				0.357357	0.539695
				0.357357	0.298203																				0.358358	0.544504
				0.358358	0.300826																				0.359359	0.549307
				0.359359	0.303462																				0.36036	0.554104
				0.36036	0.30611																				0.361361	0.558894
				0.361361	0.308772																				0.362362	0.563677
				0.362362	0.311447																				0.363363	0.56845
				0.363363	0.314135																				0.364364	0.573213
				0.364364	0.316835																				0.365365	0.577965
				0.365365	0.319548																				0.366366	0.582706
				0.366366	0.322274																				0.367367	0.587434
				0.367367	0.325012																				0.368368	0.592148
				0.368368	0.327762																				0.369369	0.596848
				0.369369	0.330524																				0.37037	0.601533
				0.37037	0.333298																				0.371371	0.606202
				0.371371	0.336084																				0.372372	0.610853
				0.372372	0.338881																				0.373373	0.615487
				0.373373	0.34169																				0.374374	0.620102
				0.374374	0.344511																				0.375375	0.624698
				0.375375	0.347342																				0.376376	0.629273
				0.376376	0.350185																				0.377377	0.633827
				0.377377	0.353038																				0.378378	0.63836
				0.378378	0.355903																				0.379379	0.64287
				0.379379	0.358777																				0.38038	0.647357
				0.38038	0.361663																				0.381381	0.651819
				0.381381	0.364558																				0.382382	0.656258
				0.382382	0.367464																				0.383383	0.66067
				0.383383	0.370379																				0.384384	0.665057
				0.384384	0.373304																				0.385385	0.669417
				0.385385	0.376239																				0.386386	0.67375
				0.386386	0.379183																				0.387387	0.678055
				0.387387	0.382136																				0.388388	0.682331
				0.388388	0.385099																				0.389389	0.686579
				0.389389	0.38807																				0.39039	0.690796
				0.39039	0.391049																				0.391391	0.694984
				0.391391	0.394037																				0.392392	0.699141
				0.392392	0.397034																				0.393393	0.703267
				0.393393	0.400038																				0.394394	0.707362
				0.394394	0.40305																				0.395395	0.711424
				0.395395	0.40607																				0.396396	0.715454
				0.396396	0.409097																				0.397397	0.719451
				0.397397	0.412131																				0.398398	0.723415
				0.398398	0.415172																				0.399399	0.727345
				0.399399	0.418221																				0.4004	0.731241
				0.4004	0.421275																				0.401401	0.735103
				0.401401	0.424336																				0.402402	0.73893
				0.402402	0.427403																				0.403403	0.742722
				0.403403	0.430476																				0.404404	0.74648
				0.404404	0.433555																				0.405405	0.750201
				0.405405	0.436639																				0.406406	0.753887
				0.406406	0.439728																				0.407407	0.757537
				0.407407	0.442822																				0.408408	0.761151
				0.408408	0.445921																				0.409409	0.764729
				0.409409	0.449025																				0.41041	0.76827
				0.41041	0.452133																				0.411411	0.771775
				0.411411	0.455245																				0.412412	0.775243
				0.412412	0.458361																				0.413413	0.778674
				0.413413	0.46148																				0.414414	0.782068
				0.414414	0.464603																				0.415415	0.785425
				0.415415	0.467729																				0.416416	0.788746
				0.416416	0.470858																				0.417417	0.792029
				0.417417	0.473989																				0.418418	0.795275
				0.418418	0.477123																				0.419419	0.798483
				0.419419	0.480259																				0.42042	0.801655
				0.42042	0.483397																				0.421421	0.80479
				0.421421	0.486537																				0.422422	0.807887
				0.422422	0.489678																				0.423423	0.810947
				0.423423	0.49282																				0.424424	0.813971
				0.427	0.504054																				0.425425	0.816957
				0.43043	0.51483																				0.426426	0.819907
				0.431431	0.517973																				0.427	0.82158
				0.432432	0.521116																				0.427427	0.82282
				0.433433	0.524257																				0.428428	0.825696
				0.434434	0.527396																				0.429429	0.828536
				0.435435	0.530534																				0.43043	0.831339
				0.436436	0.53367																				0.431431	0.834106
				0.437437	0.536804																				0.432432	0.836838
				0.438438	0.539935																				0.433433	0.839533
				0.439439	0.543063																				0.434434	0.842192
				0.44044	0.546189																				0.435435	0.844816
				0.441441	0.549311																				0.436436	0.847405
				0.442442	0.55243																				0.437437	0.849958
				0.443443	0.555546																				0.438438	0.852476
				0.444444	0.558657																				0.439439	0.85496
				0.445445	0.561765																				0.44044	0.857409
				0.446446	0.564868																				0.441441	0.859824
				0.447447	0.567966																				0.442442	0.862205
				0.448448	0.57106																				0.443443	0.864552
				0.449449	0.574149																				0.444444	0.866866
				0.45045	0.577232																				0.445445	0.869146
				0.451451	0.58031																				0.446446	0.871393
				0.452452	0.583383																				0.447447	0.873608
				0.453453	0.586449																				0.448448	0.87579
				0.454454	0.589509																				0.449449	0.87794
				0.455455	0.592563																				0.45045	0.880058
				0.456456	0.59561																				0.451451	0.882145
				0.457457	0.598651																				0.452452	0.8842
				0.458458	0.601684																				0.453453	0.886224
				0.459459	0.604711																				0.454454	0.888217
				0.46046	0.607729																				0.455455	0.89018
				0.461461	0.610741																				0.456456	0.892113
				0.462462	0.613744																				0.457457	0.894016
				0.463463	0.616739																				0.458458	0.89589
				0.464464	0.619726																				0.459459	0.897734
				0.465465	0.622705																				0.46046	0.89955
				0.466466	0.625675																				0.461461	0.901337
				0.467467	0.628636																				0.462462	0.903096
				0.468468	0.631589																				0.463463	0.904827
				0.469469	0.634532																				0.464464	0.90653
				0.47047	0.637465																				0.465465	0.908206
				0.471471	0.640389																				0.466466	0.909855
				0.472472	0.643304																				0.467467	0.911478
				0.473473	0.646208																				0.468468	0.913074
				0.474474	0.649103																				0.469469	0.914644
				0.475475	0.651987																				0.47047	0.916189
				0.476476	0.65486																				0.471471	0.917708
				0.477477	0.657723																				0.472472	0.919202
				0.478478	0.660576																				0.473473	0.920672
				0.479479	0.663417																				0.474474	0.922117
				0.48048	0.666247																				0.475475	0.923538
				0.481481	0.669066																				0.476476	0.924936
				0.482482	0.671874																				0.477477	0.92631
				0.483483	0.67467																				0.478478	0.927661
				0.484484	0.677455																				0.479479	0.928989
				0.485485	0.680227																				0.48048	0.930294
				0.486486	0.682988																				0.481481	0.931578
				0.487487	0.685737																				0.482482	0.932839
				0.488488	0.688473																				0.483483	0.93408
				0.489489	0.691197																				0.484484	0.935298
				0.49049	0.693909																				0.485485	0.936496
				0.491491	0.696608																				0.486486	0.937673
				0.492492	0.699294																				0.487487	0.93883
				0.493493	0.701968																				0.488488	0.939967
				0.494494	0.704628																				0.489489	0.941084
				0.495495	0.707276																				0.49049	0.942182
				0.496496	0.70991																				0.491491	0.943261
				0.497497	0.712531																				0.492492	0.94432
				0.498498	0.715138																				0.493493	0.945361
				0.499499	0.717732																				0.494494	0.946384
				0.500501	0.720313																				0.495495	0.947389
				0.501502	0.72288																				0.496496	0.948375
				0.502503	0.725433																				0.497497	0.949345
				0.503504	0.727972																				0.498498	0.950297
				0.504505	0.730498																				0.499499	0.951232
				0.505506	0.733009																				0.500501	0.952151
				0.506507	0.735506																				0.501502	0.953053
				0.507508	0.737989																				0.502503	0.953939
				0.508509	0.740458																				0.503504	0.954809
				0.50951	0.742913																				0.504505	0.955664
				0.510511	0.745353																				0.505506	0.956503
				0.511512	0.747779																				0.506507	0.957327
				0.512513	0.75019																				0.507508	0.958136
				0.513514	0.752587																				0.508509	0.95893
				0.514515	0.754969																				0.50951	0.95971
				0.515516	0.757337																				0.510511	0.960476
				0.516517	0.759689																				0.511512	0.961228
				0.517518	0.762028																				0.512513	0.961966
				0.518519	0.764351																				0.513514	0.962691
				0.51952	0.766659																				0.514515	0.963402
				0.520521	0.768953																				0.515516	0.964101
				0.521522	0.771232																				0.516517	0.964786
				0.522523	0.773496																				0.517518	0.965459
				0.523524	0.775745																				0.518519	0.96612
				0.524525	0.777979																				0.51952	0.966768
				0.525526	0.780198																				0.520521	0.967404
				0.526527	0.782402																				0.521522	0.968029
				0.527528	0.78459																				0.522523	0.968642
				0.528529	0.786764																				0.523524	0.969244
				0.52953	0.788923																				0.524525	0.969834
				0.530531	0.791067																				0.525526	0.970414
				0.531532	0.793196																				0.526527	0.970983
				0.532533	0.795309																				0.527528	0.971541
				0.533534	0.797408																				0.528529	0.972088
				0.534535	0.799491																				0.52953	0.972626
				0.535536	0.80156																				0.530531	0.973153
				0.536537	0.803613																				0.531532	0.973671
				0.537538	0.805651																				0.532533	0.974179
				0.538539	0.807674																				0.533534	0.974677
				0.53954	0.809682																				0.534535	0.975166
[truncated: 463 more rows]

## Sheet: Figure 1f
Traces inset																						IV raw data
[truncated: 6,009 more rows]

## Sheet: Figure 1g
Time	Control	washout			Time	gmtx4 (1 uM)				Effects of GsMTx4 on SGN activity and recovery after washout
[truncated: 10,322 more rows]

[truncated: 1 more sheets: Figure 1h]
