# Supplementary material for: Intrinsic mechanical sensitivity of mammalian auditory neurons as a contributor to sound-driven neural activity
Source: eLife. 2022 Mar 10;11:e74948. doi: 10.7554/eLife.74948 (PMC8942473; doi:10.7554/eLife.74948)
Supplement: Figure 2—figure supplement 1—source data 1. [file elife-74948-fig2-figsupp1-data1.xls]

## Sheet: Figure 2-supplement data 1
	control	GsMtx4									control	GsMtx4					control	GsMtx4				Effects of 1 uM GsMTx4 on dual (current/mech) stimulation								Figure 2- figure supplement 1
		MS-C										MS-C						MS-C												GsMTx4 reduced facilitation and spike timing after dual current injection and mechanical stimulation.
	13909025	13909027									13909025	13909027					13909025	13909027
0	-63.9954	-57.3425			-41.9922					0	-63.9954	-57.3425			-41.9922	0	-63.9954	-57.3425			-41.9922
0.05	-63.8428	-57.1899			-41.6565					0.05	-63.8428	-57.1899			-41.6565	0.05	-63.8428	-57.1899			-41.6565
0.1	-63.8123	-57.1289			-41.1987					0.1	-63.8123	-57.1289			-41.1987	0.1	-63.8123	-57.1289			-41.1987
0.15	-64.0564	-56.9763			-40.8325					0.15	-64.0564	-56.9763			-40.8325	0.15	-64.0564	-56.9763			-40.8325
0.2	-63.9343	-57.2815			-40.7715					0.2	-63.9343	-57.2815			-40.7715	0.2	-63.9343	-57.2815			-40.7715
0.25	-63.7817	-57.312			-40.5579					0.25	-63.7817	-57.312			-40.5579	0.25	-63.7817	-57.312			-40.5579
0.3	-63.7817	-57.2815			-40.2527					0.3	-63.7817	-57.2815			-40.2527	0.3	-63.7817	-57.2815			-40.2527
0.35	-64.0564	-57.1594			-39.8254					0.35	-64.0564	-57.1594			-39.8254	0.35	-64.0564	-57.1594			-39.8254
0.4	-63.9343	-57.0984			-39.4287					0.4	-63.9343	-57.0984			-39.4287	0.4	-63.9343	-57.0984			-39.4287
0.45	-63.9038	-57.0068			-39.3982					0.45	-63.9038	-57.0068			-39.3982	0.45	-63.9038	-57.0068			-39.3982
0.5	-63.8123	-57.0679			-39.1846					0.5	-63.8123	-57.0679			-39.1846	0.5	-63.8123	-57.0679			-39.1846
0.55	-64.1479	-57.312			-38.8184					0.55	-64.1479	-57.312			-38.8184	0.55	-64.1479	-57.312			-38.8184
0.6	-63.9954	-57.3425			-38.3301					0.6	-63.9954	-57.3425			-38.3301	0.6	-63.9954	-57.3425			-38.3301
0.65	-63.9038	-57.251			-37.9639					0.65	-63.9038	-57.251			-37.9639	0.65	-63.9038	-57.251			-37.9639
0.7	-63.8428	-57.312			-37.5671					0.7	-63.8428	-57.312			-37.5671	0.7	-63.8428	-57.312			-37.5671
0.75	-64.209	-57.1594			-37.323					0.75	-64.209	-57.1594			-37.323	0.75	-64.209	-57.1594			-37.323
0.8	-64.0869	-57.0068			-36.6821					0.8	-64.0869	-57.0068			-36.6821	0.8	-64.0869	-57.0068			-36.6821
0.85	-64.0259	-57.251			-36.1938					0.85	-64.0259	-57.251			-36.1938	0.85	-64.0259	-57.251			-36.1938
0.9	-63.9038	-57.4341			-35.4004					0.9	-63.9038	-57.4341			-35.4004	0.9	-63.9038	-57.4341			-35.4004
0.95	-64.1479	-57.312			-34.5459					0.95	-64.1479	-57.312			-34.5459	0.95	-64.1479	-57.312			-34.5459
1	-64.1785	-57.2205			-33.8135					1	-64.1785	-57.2205			-33.8135	1	-64.1785	-57.2205			-33.8135
1.05	-64.0564	-57.2815			-33.0505					1.05	-64.0564	-57.2815			-33.0505	1.05	-64.0564	-57.2815			-33.0505
1.1	-63.7207	-57.1289			-31.7383					1.1	-63.7207	-57.1289			-31.7383	1.1	-63.7207	-57.1289			-31.7383
1.15	-64.0564	-57.0984			-30.365					1.15	-64.0564	-57.0984			-30.365	1.15	-64.0564	-57.0984			-30.365
1.2	-64.1785	-57.1289			-28.7476					1.2	-64.1785	-57.1289			-28.7476	1.2	-64.1785	-57.1289			-28.7476
1.25	-64.0869	-57.312			-26.886					1.25	-64.0869	-57.312			-26.886	1.25	-64.0869	-57.312			-26.886
1.3	-63.9038	-57.312			-25.0854					1.3	-63.9038	-57.312			-25.0854	1.3	-63.9038	-57.312			-25.0854
1.35	-63.8428	-57.1289			-23.1934					1.35	-63.8428	-57.1289			-23.1934	1.35	-63.8428	-57.1289			-23.1934
1.4	-64.1174	-57.0984			-20.9656					1.4	-64.1174	-57.0984			-20.9656	1.4	-64.1174	-57.0984			-20.9656
1.45	-64.0869	-56.9458			-18.6462					1.45	-64.0869	-56.9458			-18.6462	1.45	-64.0869	-56.9458			-18.6462
1.5	-63.9343	-57.1289			-16.2659					1.5	-63.9343	-57.1289			-16.2659	1.5	-63.9343	-57.1289			-16.2659
1.55	-63.7207	-57.2205			-13.7634					1.55	-63.7207	-57.2205			-13.7634	1.55	-63.7207	-57.2205			-13.7634
1.6	-64.0564	-57.1289			-11.1084					1.6	-64.0564	-57.1289			-11.1084	1.6	-64.0564	-57.1289			-11.1084
1.65	-64.1174	-56.9763			-8.81958					1.65	-64.1174	-56.9763			-8.81958	1.65	-64.1174	-56.9763			-8.81958
1.7	-63.9954	-57.0068			-6.53076					1.7	-63.9954	-57.0068			-6.53076	1.7	-63.9954	-57.0068			-6.53076
1.75	-63.9648	-57.1899			-4.08936					1.75	-63.9648	-57.1899			-4.08936	1.75	-63.9648	-57.1899			-4.08936
1.8	-63.8123	-57.1289			-1.83106					1.8	-63.8123	-57.1289			-1.83106	1.8	-63.8123	-57.1289			-1.83106
1.85	-64.0869	-56.9153			0.396728					1.85	-64.0869	-56.9153			0.396728	1.85	-64.0869	-56.9153			0.396728
1.9	-64.0564	-57.2815			2.38037					1.9	-64.0564	-57.2815			2.38037	1.9	-64.0564	-57.2815			2.38037
1.95	-63.9343	-57.1289			4.30298					1.95	-63.9343	-57.1289			4.30298	1.95	-63.9343	-57.1289			4.30298
2	-63.9648	-57.0374			5.7373					2	-63.9648	-57.0374			5.7373	2	-63.9648	-57.0374			5.7373
2.05	-63.8733	-57.2205			7.04956					2.05	-63.8733	-57.2205			7.04956	2.05	-63.8733	-57.2205			7.04956
2.1	-63.9954	-56.9458			8.23974					2.1	-63.9954	-56.9458			8.23974	2.1	-63.9954	-56.9458			8.23974
2.15	-64.0564	-57.2205			9.39941					2.15	-64.0564	-57.2205			9.39941	2.15	-64.0564	-57.2205			9.39941
2.2	-64.0259	-57.0984			10.376					2.2	-64.0259	-57.0984			10.376	2.2	-64.0259	-57.0984			10.376
2.25	-63.9343	-56.9153			11.261					2.25	-63.9343	-56.9153			11.261	2.25	-63.9343	-56.9153			11.261
2.3	-63.7512	-57.2205			11.9629					2.3	-63.7512	-57.2205			11.9629	2.3	-63.7512	-57.2205			11.9629
2.35	-63.9343	-56.9763			12.3901					2.35	-63.9343	-56.9763			12.3901	2.35	-63.9343	-56.9763			12.3901
2.4	-63.9954	-57.251			12.6953					2.4	-63.9954	-57.251			12.6953	2.4	-63.9954	-57.251			12.6953
2.45	-63.9038	-57.0374			12.8479					2.45	-63.9038	-57.0374			12.8479	2.45	-63.9038	-57.0374			12.8479
2.5	-63.9343	-56.9458			13.0615					2.5	-63.9343	-56.9458			13.0615	2.5	-63.9343	-56.9458			13.0615
2.55	-63.6597	-57.0984			13.1836					2.55	-63.6597	-57.0984			13.1836	2.55	-63.6597	-57.0984			13.1836
2.6	-63.8123	-56.9763			13.1226					2.6	-63.8123	-56.9763			13.1226	2.6	-63.8123	-56.9763			13.1226
2.65	-64.0869	-57.1899			13.1836					2.65	-64.0869	-57.1899			13.1836	2.65	-64.0869	-57.1899			13.1836
2.7	-63.9648	-57.0679			13.0615					2.7	-63.9648	-57.0679			13.0615	2.7	-63.9648	-57.0679			13.0615
2.75	-63.9343	-57.0068			12.6343					2.75	-63.9343	-57.0068			12.6343	2.75	-63.9343	-57.0068			12.6343
2.8	-63.8733	-57.1594			11.9934					2.8	-63.8733	-57.1594			11.9934	2.8	-63.8733	-57.1594			11.9934
2.85	-63.8123	-57.0068			11.5662					2.85	-63.8123	-57.0068			11.5662	2.85	-63.8123	-57.0068			11.5662
2.9	-64.0259	-57.1899			11.1389					2.9	-64.0259	-57.1899			11.1389	2.9	-64.0259	-57.1899			11.1389
2.95	-64.1479	-57.2205			10.498					2.95	-64.1479	-57.2205			10.498	2.95	-64.1479	-57.2205			10.498
3	-64.0259	-56.9153			10.0708					3	-64.0259	-56.9153			10.0708	3	-64.0259	-56.9153			10.0708
3.05	-64.0564	-57.251			9.00268					3.05	-64.0564	-57.251			9.00268	3.05	-64.0564	-57.251			9.00268
3.1	-63.9343	-57.1899			8.42285					3.1	-63.9343	-57.1899			8.42285	3.1	-63.9343	-57.1899			8.42285
3.15	-63.6902	-56.9763			7.65991					3.15	-63.6902	-56.9763			7.65991	3.15	-63.6902	-56.9763			7.65991
3.2	-63.9648	-57.3425			6.65283					3.2	-63.9648	-57.3425			6.65283	3.2	-63.9648	-57.3425			6.65283
3.25	-64.1479	-57.1594			5.7373					3.25	-64.1479	-57.1594			5.7373	3.25	-64.1479	-57.1594			5.7373
3.3	-64.0259	-56.9763			4.91333					3.3	-64.0259	-56.9763			4.91333	3.3	-64.0259	-56.9763			4.91333
3.35	-63.9954	-57.251			3.93677					3.35	-63.9954	-57.251			3.93677	3.35	-63.9954	-57.251			3.93677
3.4	-63.9038	-57.1899			2.86865					3.4	-63.9038	-57.1899			2.86865	3.4	-63.9038	-57.1899			2.86865
3.45	-63.8428	-56.9458			2.16675					3.45	-63.8428	-56.9458			2.16675	3.45	-63.8428	-56.9458			2.16675
3.5	-63.8733	-57.1899			0.88501					3.5	-63.8733	-57.1899			0.88501	3.5	-63.8733	-57.1899			0.88501
3.55	-64.0564	-57.0984			-0.030518					3.55	-64.0564	-57.0984			-0.030518	3.55	-64.0564	-57.0984			-0.030518
3.6	-64.0564	-56.7932			-0.854492					3.6	-64.0564	-56.7932			-0.854492	3.6	-64.0564	-56.7932			-0.854492
3.65	-63.8733	-57.1594			-2.19726					3.65	-63.8733	-57.1594			-2.19726	3.65	-63.8733	-57.1594			-2.19726
3.7	-63.9954	-57.0068			-2.99072					3.7	-63.9954	-57.0068			-2.99072	3.7	-63.9954	-57.0068			-2.99072
3.75	-63.8733	-56.8848			-4.39453					3.75	-63.8733	-56.8848			-4.39453	3.75	-63.8733	-56.8848			-4.39453
3.8	-63.7512	-57.0679			-5.34058					3.8	-63.7512	-57.0679			-5.34058	3.8	-63.7512	-57.0679			-5.34058
3.85	-63.8428	-56.9763			-6.34766					3.85	-63.8428	-56.9763			-6.34766	3.85	-63.8428	-56.9763			-6.34766
3.9	-64.1479	-56.9763			-7.59888					3.9	-64.1479	-56.9763			-7.59888	3.9	-64.1479	-56.9763			-7.59888
3.95	-64.0259	-56.9763			-8.5144					3.95	-64.0259	-56.9763			-8.5144	3.95	-64.0259	-56.9763			-8.5144
4	-63.8733	-57.0984			-9.94873					4	-63.8733	-57.0984			-9.94873	4	-63.8733	-57.0984			-9.94873
4.05	-63.9648	-56.9153			-10.8032					4.05	-63.9648	-56.9153			-10.8032	4.05	-63.9648	-56.9153			-10.8032
4.1	-63.9648	-56.7322			-11.7187					4.1	-63.9648	-56.7322			-11.7187	4.1	-63.9648	-56.7322			-11.7187
4.15	-63.7512	-57.0679			-12.8479					4.15	-63.7512	-57.0679			-12.8479	4.15	-63.7512	-57.0679			-12.8479
4.2	-63.7817	-57.0374			-13.7939					4.2	-63.7817	-57.0374			-13.7939	4.2	-63.7817	-57.0374			-13.7939
4.25	-63.9648	-56.7627			-15.0146					4.25	-63.9648	-56.7627			-15.0146	4.25	-63.9648	-56.7627			-15.0146
4.3	-64.1174	-56.9458			-15.8997					4.3	-64.1174	-56.9458			-15.8997	4.3	-64.1174	-56.9458			-15.8997
4.35	-64.0259	-56.9458			-16.6626					4.35	-64.0259	-56.9458			-16.6626	4.35	-64.0259	-56.9458			-16.6626
4.4	-63.9648	-56.8542			-17.9443					4.4	-63.9648	-56.8542			-17.9443	4.4	-63.9648	-56.8542			-17.9443
4.45	-63.9343	-56.7627			-18.7683					4.45	-63.9343	-56.7627			-18.7683	4.45	-63.9343	-56.7627			-18.7683
4.5	-63.8733	-56.9153			-19.5007					4.5	-63.8733	-56.9153			-19.5007	4.5	-63.8733	-56.9153			-19.5007
4.55	-63.7817	-56.8237			-20.6909					4.55	-63.7817	-56.8237			-20.6909	4.55	-63.7817	-56.8237			-20.6909
4.6	-64.0259	-56.7017			-21.5454					4.6	-64.0259	-56.7017			-21.5454	4.6	-64.0259	-56.7017			-21.5454
4.65	-64.0564	-56.7932			-22.3999					4.65	-64.0564	-56.7932			-22.3999	4.65	-64.0564	-56.7932			-22.3999
4.7	-64.0259	-56.8237			-23.4375					4.7	-64.0259	-56.8237			-23.4375	4.7	-64.0259	-56.8237			-23.4375
4.75	-63.8428	-56.6101			-24.1394					4.75	-63.8428	-56.6101			-24.1394	4.75	-63.8428	-56.6101			-24.1394
4.8	-63.8428	-56.5186			-24.9634					4.8	-63.8428	-56.5186			-24.9634	4.8	-63.8428	-56.5186			-24.9634
4.85	-64.0564	-56.8848			-25.9094					4.85	-64.0564	-56.8848			-25.9094	4.85	-64.0564	-56.8848			-25.9094
4.9	-63.9954	-56.7627			-26.7334					4.9	-63.9954	-56.7627			-26.7334	4.9	-63.9954	-56.7627			-26.7334
4.95	-63.7817	-56.6406			-27.3132					4.95	-63.7817	-56.6406			-27.3132	4.95	-63.7817	-56.6406			-27.3132
5	-64.0564	-56.5796			-28.4119					5	-64.0564	-56.5796			-28.4119	5	-64.0564	-56.5796			-28.4119
5.05	-64.0259	-56.9153			-29.1748					5.05	-64.0259	-56.9153			-29.1748	5.05	-64.0259	-56.9153			-29.1748
5.1	-63.8123	-56.7322			-29.6326					5.1	-63.8123	-56.7322			-29.6326	5.1	-63.8123	-56.7322			-29.6326
5.15	-64.1785	-56.5491			-30.7617					5.15	-64.1785	-56.5491			-30.7617	5.15	-64.1785	-56.5491			-30.7617
5.2	-64.0869	-56.7322			-31.4636					5.2	-64.0869	-56.7322			-31.4636	5.2	-64.0869	-56.7322			-31.4636
5.25	-63.7512	-56.8542			-32.1045					5.25	-63.7512	-56.8542			-32.1045	5.25	-63.7512	-56.8542			-32.1045
5.3	-64.1174	-56.8237			-33.0505					5.3	-64.1174	-56.8237			-33.0505	5.3	-64.1174	-56.8237			-33.0505
5.35	-63.9648	-56.366			-33.7524					5.35	-63.9648	-56.366			-33.7524	5.35	-63.9648	-56.366			-33.7524
5.4	-64.0259	-56.7322			-34.4238					5.4	-64.0259	-56.7322			-34.4238	5.4	-64.0259	-56.7322			-34.4238
5.45	-64.0564	-56.7627			-35.1257					5.45	-64.0564	-56.7627			-35.1257	5.45	-64.0564	-56.7627			-35.1257
5.5	-63.6902	-56.6406			-36.1023					5.5	-63.6902	-56.6406			-36.1023	5.5	-63.6902	-56.6406			-36.1023
5.55	-64.1174	-56.4575			-36.6211					5.55	-64.1174	-56.4575			-36.6211	5.55	-64.1174	-56.4575			-36.6211
5.6	-63.9038	-56.7017			-37.1094					5.6	-63.9038	-56.7017			-37.1094	5.6	-63.9038	-56.7017			-37.1094
5.65	-63.9954	-56.7017			-38.0554					5.65	-63.9954	-56.7017			-38.0554	5.65	-63.9954	-56.7017			-38.0554
5.7	-63.9343	-56.6101			-38.6352					5.7	-63.9343	-56.6101			-38.6352	5.7	-63.9343	-56.6101			-38.6352
5.75	-63.7207	-56.427			-39.1235					5.75	-63.7207	-56.427			-39.1235	5.75	-63.7207	-56.427			-39.1235
5.8	-64.0564	-56.6406			-39.6728					5.8	-64.0564	-56.6406			-39.6728	5.8	-64.0564	-56.6406			-39.6728
5.85	-63.9343	-56.6101			-40.5579					5.85	-63.9343	-56.6101			-40.5579	5.85	-63.9343	-56.6101			-40.5579
5.9	-63.9648	-56.5491			-41.0461					5.9	-63.9648	-56.5491			-41.0461	5.9	-63.9648	-56.5491			-41.0461
5.95	-63.9648	-56.3354			-41.4734					5.95	-63.9648	-56.3354			-41.4734	5.95	-63.9648	-56.3354			-41.4734
6	-63.7817	-56.5796			-42.2058					6	-63.7817	-56.5796			-42.2058	6	-63.7817	-56.5796			-42.2058
6.05	-63.9954	-56.5186			-42.7551					6.05	-63.9954	-56.5186			-42.7551	6.05	-63.9954	-56.5186			-42.7551
6.1	-63.9954	-56.5796			-43.1824					6.1	-63.9954	-56.5796			-43.1824	6.1	-63.9954	-56.5796			-43.1824
6.15	-63.7817	-56.3049			-43.5486					6.15	-63.7817	-56.3049			-43.5486	6.15	-63.7817	-56.3049			-43.5486
6.2	-64.1785	-56.427			-44.342					6.2	-64.1785	-56.427			-44.342	6.2	-64.1785	-56.427			-44.342
6.25	-63.9343	-56.5186			-44.6167					6.25	-63.9343	-56.5186			-44.6167	6.25	-63.9343	-56.5186			-44.6167
6.3	-63.9343	-56.5186			-45.0745					6.3	-63.9343	-56.5186			-45.0745	6.3	-63.9343	-56.5186			-45.0745
6.35	-64.0259	-56.366			-45.4102					6.35	-64.0259	-56.366			-45.4102	6.35	-64.0259	-56.366			-45.4102
6.4	-63.9954	-56.2439			-46.0205					6.4	-63.9954	-56.2439			-46.0205	6.4	-63.9954	-56.2439			-46.0205
6.45	-64.0259	-56.5186			-46.2952					6.45	-64.0259	-56.5186			-46.2952	6.45	-64.0259	-56.5186			-46.2952
6.5	-64.0259	-56.488			-46.5393					6.5	-64.0259	-56.488			-46.5393	6.5	-64.0259	-56.488			-46.5393
6.55	-63.9038	-56.3965			-46.9971					6.55	-63.9038	-56.3965			-46.9971	6.55	-63.9038	-56.3965			-46.9971
6.6	-63.9038	-56.1523			-47.3938					6.6	-63.9038	-56.1523			-47.3938	6.6	-63.9038	-56.1523			-47.3938
6.65	-64.0869	-56.427			-47.5769					6.65	-64.0869	-56.427			-47.5769	6.65	-64.0869	-56.427			-47.5769
6.7	-63.9343	-56.5186			-47.6379					6.7	-63.9343	-56.5186			-47.6379	6.7	-63.9343	-56.5186			-47.6379
6.75	-63.8428	-56.427			-48.0957					6.75	-63.8428	-56.427			-48.0957	6.75	-63.8428	-56.427			-48.0957
6.8	-64.0259	-56.1829			-48.3704					6.8	-64.0259	-56.1829			-48.3704	6.8	-64.0259	-56.1829			-48.3704
6.85	-63.9954	-56.1218			-48.4619					6.85	-63.9954	-56.1218			-48.4619	6.85	-63.9954	-56.1218			-48.4619
6.9	-63.7512	-56.3965			-48.5229					6.9	-63.7512	-56.3965			-48.5229	6.9	-63.7512	-56.3965			-48.5229
6.95	-64.0259	-56.3354			-48.9807					6.95	-64.0259	-56.3354			-48.9807	6.95	-64.0259	-56.3354			-48.9807
7	-63.9343	-56.3965			-49.1638					7	-63.9343	-56.3965			-49.1638	7	-63.9343	-56.3965			-49.1638
7.05	-63.6902	-56.1523			-49.2859					7.05	-63.6902	-56.1523			-49.2859	7.05	-63.6902	-56.1523			-49.2859
7.1	-64.0564	-56.1523			-49.1943					7.1	-64.0564	-56.1523			-49.1943	7.1	-64.0564	-56.1523			-49.1943
7.15	-63.9343	-56.3965			-49.5605					7.15	-63.9343	-56.3965			-49.5605	7.15	-63.9343	-56.3965			-49.5605
7.2	-63.8428	-56.2744			-49.7742					7.2	-63.8428	-56.2744			-49.7742	7.2	-63.8428	-56.2744			-49.7742
7.25	-64.0259	-56.2134			-49.8047					7.25	-64.0259	-56.2134			-49.8047	7.25	-64.0259	-56.2134			-49.8047
7.3	-64.0869	-56.0913			-49.6521					7.3	-64.0869	-56.0913			-49.6521	7.3	-64.0869	-56.0913			-49.6521
7.35	-63.9038	-56.1218			-49.8657					7.35	-63.9038	-56.1218			-49.8657	7.35	-63.9038	-56.1218			-49.8657
7.4	-63.6902	-56.366			-50.1404					7.4	-63.6902	-56.366			-50.1404	7.4	-63.6902	-56.366			-50.1404
7.45	-64.0869	-56.2439			-50.0183					7.45	-64.0869	-56.2439			-50.0183	7.45	-64.0869	-56.2439			-50.0183
7.5	-64.0259	-56.1829			-49.9573					7.5	-64.0259	-56.1829			-49.9573	7.5	-64.0259	-56.1829			-49.9573
7.55	-63.6902	-56.2439			-49.9573					7.55	-63.6902	-56.2439			-49.9573	7.55	-63.6902	-56.2439			-49.9573
7.6	-63.9648	-56.0913								7.6	-63.9648	-56.0913				7.6	-63.9648	-56.0913
7.65	-64.0259	-56.2744								7.65	-64.0259	-56.2744				7.65	-64.0259	-56.2744
7.7	-63.9648	-56.3049								7.7	-63.9648	-56.3049				7.7	-63.9648	-56.3049
7.75	-63.7512	-56.2439								7.75	-63.7512	-56.2439				7.75	-63.7512	-56.2439
7.8	-63.9343	-56.3354								7.8	-63.9343	-56.3354				7.8	-63.9343	-56.3354
7.85	-63.9343	-55.9387								7.85	-63.9343	-55.9387				7.85	-63.9343	-55.9387
7.9	-63.7817	-56.1523								7.9	-63.7817	-56.1523				7.9	-63.7817	-56.1523
7.95	-63.8428	-56.366								7.95	-63.8428	-56.366				7.95	-63.8428	-56.366
8	-63.9038	-56.1829								8	-63.9038	-56.1829				8	-63.9038	-56.1829
8.05	-63.9648	-56.2439								8.05	-63.9648	-56.2439				8.05	-63.9648	-56.2439
8.1	-63.7512	-56.1218								8.1	-63.7512	-56.1218				8.1	-63.7512	-56.1218
8.15	-64.0259	-55.9692								8.15	-64.0259	-55.9692				8.15	-64.0259	-55.9692
8.2	-63.9343	-56.2439								8.2	-63.9343	-56.2439				8.2	-63.9343	-56.2439
8.25	-63.7512	-56.3965								8.25	-63.7512	-56.3965				8.25	-63.7512	-56.3965
8.3	-63.7817	-56.2134								8.3	-63.7817	-56.2134				8.3	-63.7817	-56.2134
8.35	-63.9954	-56.2134								8.35	-63.9954	-56.2134				8.35	-63.9954	-56.2134
8.4	-63.8733	-56.1829								8.4	-63.8733	-56.1829				8.4	-63.8733	-56.1829
8.45	-63.7817	-56.0303								8.45	-63.7817	-56.0303				8.45	-63.7817	-56.0303
8.5	-63.7512	-56.2134								8.5	-63.7512	-56.2134				8.5	-63.7512	-56.2134
8.55	-64.0564	-56.427								8.55	-64.0564	-56.427				8.55	-64.0564	-56.427
8.6	-63.7817	-56.488								8.6	-63.7817	-56.488				8.6	-63.7817	-56.488
8.65	-63.7207	-56.427								8.65	-63.7207	-56.427				8.65	-63.7207	-56.427
8.7	-63.7817	-56.3049								8.7	-63.7817	-56.3049				8.7	-63.7817	-56.3049
8.75	-63.9648	-56.1829								8.75	-63.9648	-56.1829				8.75	-63.9648	-56.1829
8.8	-63.8733	-56.2744								8.8	-63.8733	-56.2744				8.8	-63.8733	-56.2744
8.85	-63.6597	-56.5796								8.85	-63.6597	-56.5796				8.85	-63.6597	-56.5796
8.9	-63.7512	-56.3965								8.9	-63.7512	-56.3965				8.9	-63.7512	-56.3965
8.95	-63.9343	-56.3354								8.95	-63.9343	-56.3354				8.95	-63.9343	-56.3354
9	-63.7817	-56.4575								9	-63.7817	-56.4575				9	-63.7817	-56.4575
9.05	-63.6291	-56.366								9.05	-63.6291	-56.366				9.05	-63.6291	-56.366
9.1	-63.5376	-56.2439								9.1	-63.5376	-56.2439				9.1	-63.5376	-56.2439
9.15	-63.8123	-56.2439								9.15	-63.8123	-56.2439				9.15	-63.8123	-56.2439
9.2	-63.7817	-56.488								9.2	-63.7817	-56.488				9.2	-63.7817	-56.488
9.25	-63.6597	-56.488								9.25	-63.6597	-56.488				9.25	-63.6597	-56.488
9.3	-63.4766	-56.427								9.3	-63.4766	-56.427				9.3	-63.4766	-56.427
9.35	-63.8733	-56.366								9.35	-63.8733	-56.366				9.35	-63.8733	-56.366
9.4	-63.8123	-56.3049								9.4	-63.8123	-56.3049				9.4	-63.8123	-56.3049
9.45	-63.7207	-56.3049								9.45	-63.7207	-56.3049				9.45	-63.7207	-56.3049
9.5	-63.5376	-56.2134								9.5	-63.5376	-56.2134				9.5	-63.5376	-56.2134
9.55	-63.7512	-56.366								9.55	-63.7512	-56.366				9.55	-63.7512	-56.366
9.6	-63.8733	-56.427								9.6	-63.8733	-56.427				9.6	-63.8733	-56.427
9.65	-63.8123	-56.5186								9.65	-63.8123	-56.5186				9.65	-63.8123	-56.5186
9.7	-63.6902	-56.427								9.7	-63.6902	-56.427				9.7	-63.6902	-56.427
9.75	-63.5986	-56.3965								9.75	-63.5986	-56.3965				9.75	-63.5986	-56.3965
9.8	-63.9343	-56.2134								9.8	-63.9343	-56.2134				9.8	-63.9343	-56.2134
9.85	-63.8428	-56.5491								9.85	-63.8428	-56.5491				9.85	-63.8428	-56.5491
9.9	-63.6902	-56.5186								9.9	-63.6902	-56.5186				9.9	-63.6902	-56.5186
9.95	-63.5681	-56.488								9.95	-63.5681	-56.488				9.95	-63.5681	-56.488
10	-63.7207	-56.3354								10	-63.7207	-56.3354				10	-63.7207	-56.3354
10.05	-63.8123	-56.6711								10.05	-63.8123	-56.6711				10.05	-63.8123	-56.6711
10.1	-63.6902	-56.5491								10.1	-63.6902	-56.5491				10.1	-63.6902	-56.5491
10.15	-63.7207	-56.2744								10.15	-63.7207	-56.2744				10.15	-63.7207	-56.2744
10.2	-63.5071	-56.6406								10.2	-63.5071	-56.6406				10.2	-63.5071	-56.6406
10.25	-63.7512	-56.5796								10.25	-63.7512	-56.5796				10.25	-63.7512	-56.5796
10.3	-63.8123	-56.2439								10.3	-63.8123	-56.2439				10.3	-63.8123	-56.2439
10.35	-63.7512	-56.6406								10.35	-63.7512	-56.6406				10.35	-63.7512	-56.6406
10.4	-63.6902	-56.4575								10.4	-63.6902	-56.4575				10.4	-63.6902	-56.4575
10.45	-63.4155	-56.427								10.45	-63.4155	-56.427				10.45	-63.4155	-56.427
10.5	-63.7207	-56.5186								10.5	-63.7207	-56.5186				10.5	-63.7207	-56.5186
10.55	-63.8123	-56.427								10.55	-63.8123	-56.427				10.55	-63.8123	-56.427
10.6	-63.8123	-56.6101								10.6	-63.8123	-56.6101				10.6	-63.8123	-56.6101
10.65	-63.7512	-56.488								10.65	-63.7512	-56.488				10.65	-63.7512	-56.488
10.7	-63.5986	-56.4575								10.7	-63.5986	-56.4575				10.7	-63.5986	-56.4575
10.75	-63.6597	-56.5491								10.75	-63.6597	-56.5491				10.75	-63.6597	-56.5491
10.8	-63.9648	-56.3049								10.8	-63.9648	-56.3049				10.8	-63.9648	-56.3049
10.85	-63.9038	-56.6711								10.85	-63.9038	-56.6711				10.85	-63.9038	-56.6711
10.9	-63.8123	-56.5186								10.9	-63.8123	-56.5186				10.9	-63.8123	-56.5186
10.95	-63.7207	-56.6406								10.95	-63.7207	-56.6406				10.95	-63.7207	-56.6406
11	-63.5986	-56.5491								11	-63.5986	-56.5491				11	-63.5986	-56.5491
11.05	-63.8733	-56.366								11.05	-63.8733	-56.366				11.05	-63.8733	-56.366
11.1	-63.8733	-56.7627								11.1	-63.8733	-56.7627				11.1	-63.8733	-56.7627
11.15	-63.7817	-56.6101								11.15	-63.7817	-56.6101				11.15	-63.7817	-56.6101
11.2	-63.7817	-56.488								11.2	-63.7817	-56.488				11.2	-63.7817	-56.488
11.25	-63.5681	-56.6406								11.25	-63.5681	-56.6406				11.25	-63.5681	-56.6406
11.3	-63.7207	-56.5186								11.3	-63.7207	-56.5186				11.3	-63.7207	-56.5186
11.35	-63.8428	-56.6406								11.35	-63.8428	-56.6406				11.35	-63.8428	-56.6406
11.4	-63.8428	-56.5491								11.4	-63.8428	-56.5491				11.4	-63.8428	-56.5491
11.45	-63.7817	-56.3354								11.45	-63.7817	-56.3354				11.45	-63.7817	-56.3354
11.5	-63.7512	-56.7017								11.5	-63.7512	-56.7017				11.5	-63.7512	-56.7017
11.55	-63.6902	-56.4575								11.55	-63.6902	-56.4575				11.55	-63.6902	-56.4575
11.6	-63.5986	-56.3049								11.6	-63.5986	-56.3049				11.6	-63.5986	-56.3049
11.65	-63.9343	-56.6101								11.65	-63.9343	-56.6101				11.65	-63.9343	-56.6101
11.7	-63.9343	-56.5186								11.7	-63.9343	-56.5186				11.7	-63.9343	-56.5186
11.75	-63.7512	-56.366								11.75	-63.7512	-56.366				11.75	-63.7512	-56.366
11.8	-63.8428	-56.5491								11.8	-63.8428	-56.5491				11.8	-63.8428	-56.5491
11.85	-63.7512	-56.5491								11.85	-63.7512	-56.5491				11.85	-63.7512	-56.5491
11.9	-63.6597	-56.3049								11.9	-63.6597	-56.3049				11.9	-63.6597	-56.3049
11.95	-63.7817	-56.6406								11.95	-63.7817	-56.6406				11.95	-63.7817	-56.6406
12	-63.9038	-56.6406								12	-63.9038	-56.6406				12	-63.9038	-56.6406
12.05	-63.9038	-56.3354								12.05	-63.9038	-56.3354				12.05	-63.9038	-56.3354
12.1	-63.8733	-56.488								12.1	-63.8733	-56.488				12.1	-63.8733	-56.488
12.15	-63.7512	-56.5796								12.15	-63.7512	-56.5796				12.15	-63.7512	-56.5796
12.2	-63.6291	-56.4575								12.2	-63.6291	-56.4575				12.2	-63.6291	-56.4575
12.25	-63.5986	-56.3354								12.25	-63.5986	-56.3354				12.25	-63.5986	-56.3354
12.3	-63.8123	-56.6406								12.3	-63.8123	-56.6406				12.3	-63.8123	-56.6406
12.35	-63.9038	-56.6101								12.35	-63.9038	-56.6101				12.35	-63.9038	-56.6101
12.4	-63.8428	-56.2439								12.4	-63.8428	-56.2439				12.4	-63.8428	-56.2439
12.45	-63.8428	-56.5796								12.45	-63.8428	-56.5796				12.45	-63.8428	-56.5796
12.5	-63.8123	-56.427								12.5	-63.8123	-56.427				12.5	-63.8123	-56.427
12.55	-63.6597	-56.427								12.55	-63.6597	-56.427				12.55	-63.6597	-56.427
12.6	-63.6597	-56.5186								12.6	-63.6597	-56.5186				12.6	-63.6597	-56.5186
12.65	-63.6902	-56.6101								12.65	-63.6902	-56.6101				12.65	-63.6902	-56.6101
12.7	-63.8733	-56.488								12.7	-63.8733	-56.488				12.7	-63.8733	-56.488
12.75	-63.9954	-56.3049								12.75	-63.9954	-56.3049				12.75	-63.9954	-56.3049
12.8	-63.8428	-56.6406								12.8	-63.8428	-56.6406				12.8	-63.8428	-56.6406
12.85	-63.8428	-56.5796								12.85	-63.8428	-56.5796				12.85	-63.8428	-56.5796
12.9	-63.9038	-56.366								12.9	-63.9038	-56.366				12.9	-63.9038	-56.366
12.95	-63.6902	-56.5491								12.95	-63.6902	-56.5491				12.95	-63.6902	-56.5491
13	-63.7817	-56.7017								13	-63.7817	-56.7017				13	-63.7817	-56.7017
13.05	-63.9648	-56.6406								13.05	-63.9648	-56.6406				13.05	-63.9648	-56.6406
13.1	-63.8123	-56.3354								13.1	-63.8123	-56.3354				13.1	-63.8123	-56.3354
13.15	-63.9038	-56.7017								13.15	-63.9038	-56.7017				13.15	-63.9038	-56.7017
13.2	-63.6291	-56.6406								13.2	-63.6291	-56.6406				13.2	-63.6291	-56.6406
13.25	-63.9954	-56.5796								13.25	-63.9954	-56.5796				13.25	-63.9954	-56.5796
13.3	-63.8428	-56.488								13.3	-63.8428	-56.488				13.3	-63.8428	-56.488
13.35	-63.5986	-56.7017								13.35	-63.5986	-56.7017				13.35	-63.5986	-56.7017
13.4	-63.8733	-56.6711								13.4	-63.8733	-56.6711				13.4	-63.8733	-56.6711
13.45	-63.7817	-56.4575								13.45	-63.7817	-56.4575				13.45	-63.7817	-56.4575
13.5	-63.5071	-56.6101								13.5	-63.5071	-56.6101				13.5	-63.5071	-56.6101
13.55	-63.8123	-56.6711								13.55	-63.8123	-56.6711				13.55	-63.8123	-56.6711
13.6	-63.8123	-56.6406								13.6	-63.8123	-56.6406				13.6	-63.8123	-56.6406
13.65	-63.7207	-56.366								13.65	-63.7207	-56.366				13.65	-63.7207	-56.366
13.7	-63.7817	-56.7627								13.7	-63.7817	-56.7627				13.7	-63.7817	-56.7627
13.75	-63.6902	-56.6406								13.75	-63.6902	-56.6406				13.75	-63.6902	-56.6406
13.8	-63.9343	-56.5796								13.8	-63.9343	-56.5796				13.8	-63.9343	-56.5796
13.85	-63.8428	-56.488								13.85	-63.8428	-56.488				13.85	-63.8428	-56.488
13.9	-63.6597	-56.7932								13.9	-63.6597	-56.7932				13.9	-63.6597	-56.7932
13.95	-63.9343	-56.7322								13.95	-63.9343	-56.7322				13.95	-63.9343	-56.7322
14	-63.7207	-56.5796								14	-63.7207	-56.5796				14	-63.7207	-56.5796
14.05	-63.8428	-56.4575								14.05	-63.8428	-56.4575				14.05	-63.8428	-56.4575
14.1	-63.9648	-56.8542								14.1	-63.9648	-56.8542				14.1	-63.9648	-56.8542
14.15	-63.7512	-56.7322								14.15	-63.7512	-56.7322				14.15	-63.7512	-56.7322
14.2	-63.9343	-56.7017								14.2	-63.9343	-56.7017				14.2	-63.9343	-56.7017
14.25	-63.6902	-56.6101								14.25	-63.6902	-56.6101				14.25	-63.6902	-56.6101
14.3	-63.9343	-56.8848								14.3	-63.9343	-56.8848				14.3	-63.9343	-56.8848
14.35	-63.9343	-56.7322								14.35	-63.9343	-56.7322				14.35	-63.9343	-56.7322
14.4	-63.6597	-56.7017								14.4	-63.6597	-56.7017				14.4	-63.6597	-56.7017
14.45	-63.9648	-56.5796								14.45	-63.9648	-56.5796				14.45	-63.9648	-56.5796
14.5	-63.7817	-56.8542								14.5	-63.7817	-56.8542				14.5	-63.7817	-56.8542
14.55	-63.7207	-56.7627								14.55	-63.7207	-56.7627				14.55	-63.7207	-56.7627
14.6	-63.9038	-56.7017								14.6	-63.9038	-56.7017				14.6	-63.9038	-56.7017
14.65	-63.8428	-56.6101								14.65	-63.8428	-56.6101				14.65	-63.8428	-56.6101
14.7	-63.7207	-56.6711								14.7	-63.7207	-56.6711				14.7	-63.7207	-56.6711
14.75	-63.9343	-56.8848								14.75	-63.9343	-56.8848				14.75	-63.9343	-56.8848
14.8	-63.9038	-56.6406								14.8	-63.9038	-56.6406				14.8	-63.9038	-56.6406
14.85	-63.8123	-56.7017								14.85	-63.8123	-56.7017				14.85	-63.8123	-56.7017
14.9	-63.9343	-56.5186								14.9	-63.9343	-56.5186				14.9	-63.9343	-56.5186
14.95	-63.8733	-56.8237								14.95	-63.8733	-56.8237				14.95	-63.8733	-56.8237
15	-63.8428	-56.8237								15	-63.8428	-56.8237				15	-63.8428	-56.8237
15.05	-64.0564	-56.7627								15.05	-64.0564	-56.7627				15.05	-64.0564	-56.7627
15.1	-63.8428	-56.7017								15.1	-63.8428	-56.7017				15.1	-63.8428	-56.7017
15.15	-63.8428	-56.7017								15.15	-63.8428	-56.7017				15.15	-63.8428	-56.7017
15.2	-64.0869	-56.9458								15.2	-64.0869	-56.9458				15.2	-64.0869	-56.9458
15.25	-63.9954	-56.8848								15.25	-63.9954	-56.8848				15.25	-63.9954	-56.8848
15.3	-63.6902	-56.9153								15.3	-63.6902	-56.9153				15.3	-63.6902	-56.9153
15.35	-63.9954	-56.7322								15.35	-63.9954	-56.7322				15.35	-63.9954	-56.7322
15.4	-63.9954	-56.8542								15.4	-63.9954	-56.8542				15.4	-63.9954	-56.8542
15.45	-63.8428	-56.9763								15.45	-63.8428	-56.9763				15.45	-63.8428	-56.9763
15.5	-63.8733	-56.9153								15.5	-63.8733	-56.9153				15.5	-63.8733	-56.9153
15.55	-63.9648	-56.8848								15.55	-63.9648	-56.8848				15.55	-63.9648	-56.8848
15.6	-63.8733	-56.5796								15.6	-63.8733	-56.5796				15.6	-63.8733	-56.5796
15.65	-63.7512	-56.7932								15.65	-63.7512	-56.7932				15.65	-63.7512	-56.7932
15.7	-64.0869	-57.0374								15.7	-64.0869	-57.0374				15.7	-64.0869	-57.0374
15.75	-63.9343	-56.9153								15.75	-63.9343	-56.9153				15.75	-63.9343	-56.9153
15.8	-63.6597	-56.8848								15.8	-63.6597	-56.8848				15.8	-63.6597	-56.8848
15.85	-64.0259	-56.6101								15.85	-64.0259	-56.6101				15.85	-64.0259	-56.6101
15.9	-64.0259	-56.7932								15.9	-64.0259	-56.7932				15.9	-64.0259	-56.7932
15.95	-63.9648	-57.0068								15.95	-63.9648	-57.0068				15.95	-63.9648	-57.0068
16	-63.7207	-56.9458								16	-63.7207	-56.9458				16	-63.7207	-56.9458
16.05	-64.209	-56.8848								16.05	-64.209	-56.8848				16.05	-64.209	-56.8848
16.1	-63.9954	-56.7627								16.1	-63.9954	-56.7627				16.1	-63.9954	-56.7627
16.15	-63.8733	-56.8237								16.15	-63.8733	-56.8237				16.15	-63.8733	-56.8237
16.2	-63.9648	-57.0068								16.2	-63.9648	-57.0068				16.2	-63.9648	-57.0068
16.25	-64.1479	-56.9763								16.25	-64.1479	-56.9763				16.25	-64.1479	-56.9763
16.3	-64.1174	-56.9458								16.3	-64.1174	-56.9458				16.3	-64.1174	-56.9458
16.35	-63.7817	-56.9153								16.35	-63.7817	-56.9153				16.35	-63.7817	-56.9153
16.4	-64.0564	-56.7932								16.4	-64.0564	-56.7932				16.4	-64.0564	-56.7932
16.45	-64.1174	-56.8848								16.45	-64.1174	-56.8848				16.45	-64.1174	-56.8848
16.5	-64.0564	-57.0374								16.5	-64.0564	-57.0374				16.5	-64.0564	-57.0374
16.55	-63.8428	-57.0374								16.55	-63.8428	-57.0374				16.55	-63.8428	-57.0374
16.6	-64.1479	-57.0374								16.6	-64.1479	-57.0374				16.6	-64.1479	-57.0374
16.65	-64.0564	-56.9458								16.65	-64.0564	-56.9458				16.65	-64.0564	-56.9458
16.7	-63.9343	-56.7627								16.7	-63.9343	-56.7627				16.7	-63.9343	-56.7627
16.75	-63.8733	-56.8848								16.75	-63.8733	-56.8848				16.75	-63.8733	-56.8848
16.8	-64.1785	-57.0679								16.8	-64.1785	-57.0679				16.8	-64.1785	-57.0679
16.85	-64.0259	-56.9763								16.85	-64.0259	-56.9763				16.85	-64.0259	-56.9763
16.9	-63.9648	-57.0374								16.9	-63.9648	-57.0374				16.9	-63.9648	-57.0374
16.95	-63.9954	-56.9763								16.95	-63.9954	-56.9763				16.95	-63.9954	-56.9763
17	-64.209	-56.7627								17	-64.209	-56.7627				17	-64.209	-56.7627
17.05	-64.0259	-56.8237								17.05	-64.0259	-56.8237				17.05	-64.0259	-56.8237
17.1	-64.1479	-57.0068								17.1	-64.1479	-57.0068				17.1	-64.1479	-57.0068
17.15	-63.9954	-57.0679								17.15	-63.9954	-57.0679				17.15	-63.9954	-57.0679
17.2	-64.209	-57.0068								17.2	-64.209	-57.0068				17.2	-64.209	-57.0068
17.25	-64.0869	-56.9458								17.25	-64.0869	-56.9458				17.25	-64.0869	-56.9458
17.3	-64.0869	-56.8542								17.3	-64.0869	-56.8542				17.3	-64.0869	-56.8542
17.35	-63.9343	-56.7322								17.35	-63.9343	-56.7322				17.35	-63.9343	-56.7322
17.4	-64.1479	-56.9763								17.4	-64.1479	-56.9763				17.4	-64.1479	-56.9763
17.45	-64.1479	-57.0984								17.45	-64.1479	-57.0984				17.45	-64.1479	-57.0984
17.5	-64.0259	-57.0374								17.5	-64.0259	-57.0374				17.5	-64.0259	-57.0374
17.55	-63.9343	-56.9763								17.55	-63.9343	-56.9763				17.55	-63.9343	-56.9763
17.6	-64.1479	-57.0679								17.6	-64.1479	-57.0679				17.6	-64.1479	-57.0679
17.65	-64.0564	-57.0068								17.65	-64.0564	-57.0068				17.65	-64.0564	-57.0068
17.7	-64.0564	-56.8542								17.7	-64.0564	-56.8542				17.7	-64.0564	-56.8542
17.75	-63.9038	-56.8237								17.75	-63.9038	-56.8237				17.75	-63.9038	-56.8237
17.8	-63.9648	-57.0374								17.8	-63.9648	-57.0374				17.8	-63.9648	-57.0374
17.85	-64.1479	-57.1289								17.85	-64.1479	-57.1289				17.85	-64.1479	-57.1289
17.9	-64.0564	-57.0679								17.9	-64.0564	-57.0679				17.9	-64.0564	-57.0679
17.95	-63.9648	-56.9458								17.95	-63.9648	-56.9458				17.95	-63.9648	-56.9458
18	-63.9038	-56.9153								18	-63.9038	-56.9153				18	-63.9038	-56.9153
18.05	-64.0869	-56.7627								18.05	-64.0869	-56.7627				18.05	-64.0869	-56.7627
18.1	-64.0259	-56.9458								18.1	-64.0259	-56.9458				18.1	-64.0259	-56.9458
18.15	-64.0869	-57.0068								18.15	-64.0869	-57.0068				18.15	-64.0869	-57.0068
18.2	-63.8123	-56.9458								18.2	-63.8123	-56.9458				18.2	-63.8123	-56.9458
18.25	-63.9648	-56.9458								18.25	-63.9648	-56.9458				18.25	-63.9648	-56.9458
18.3	-64.2395	-56.7627								18.3	-64.2395	-56.7627				18.3	-64.2395	-56.7627
18.35	-64.0869	-57.0679								18.35	-64.0869	-57.0679				18.35	-64.0869	-57.0679
18.4	-64.0259	-56.9153								18.4	-64.0259	-56.9153				18.4	-64.0259	-56.9153
18.45	-63.8123	-56.8237								18.45	-63.8123	-56.8237				18.45	-63.8123	-56.8237
18.5	-63.9343	-57.0679								18.5	-63.9343	-57.0679				18.5	-63.9343	-57.0679
18.55	-64.1785	-57.0068								18.55	-64.1785	-57.0068				18.55	-64.1785	-57.0068
18.6	-64.0564	-56.7627								18.6	-64.0564	-56.7627				18.6	-64.0564	-56.7627
18.65	-63.9648	-57.1289								18.65	-63.9648	-57.1289				18.65	-63.9648	-57.1289
18.7	-63.7817	-57.0679								18.7	-63.7817	-57.0679				18.7	-63.7817	-57.0679
18.75	-63.9648	-56.7627								18.75	-63.9648	-56.7627				18.75	-63.9648	-56.7627
18.8	-64.0564	-57.1289								18.8	-64.0564	-57.1289				18.8	-64.0564	-57.1289
18.85	-63.9954	-56.9763								18.85	-63.9954	-56.9763				18.85	-63.9954	-56.9763
18.9	-63.8733	-57.1899								18.9	-63.8733	-57.1899				18.9	-63.8733	-57.1899
18.95	-63.7512	-57.0374								18.95	-63.7512	-57.0374				18.95	-63.7512	-57.0374
19	-63.8428	-56.8542								19	-63.8428	-56.8542				19	-63.8428	-56.8542
19.05	-64.0564	-57.1289								19.05	-64.0564	-57.1289				19.05	-64.0564	-57.1289
19.1	-63.9954	-56.9458								19.1	-63.9954	-56.9458				19.1	-63.9954	-56.9458
19.15	-63.9343	-57.0984								19.15	-63.9343	-57.0984				19.15	-63.9343	-57.0984
19.2	-63.7512	-57.0679								19.2	-63.7512	-57.0679				19.2	-63.7512	-57.0679
19.25	-63.6291	-56.9153								19.25	-63.6291	-56.9153				19.25	-63.6291	-56.9153
19.3	-63.9648	-57.1289								19.3	-63.9648	-57.1289				19.3	-63.9648	-57.1289
19.35	-63.9954	-56.9458								19.35	-63.9954	-56.9458				19.35	-63.9954	-56.9458
19.4	-63.9954	-57.1289								19.4	-63.9954	-57.1289				19.4	-63.9954	-57.1289
19.45	-63.9343	-57.1289								19.45	-63.9343	-57.1289				19.45	-63.9343	-57.1289
19.5	-63.7207	-56.9153								19.5	-63.7207	-56.9153				19.5	-63.7207	-56.9153
19.55	-63.7817	-57.1594								19.55	-63.7817	-57.1594				19.55	-63.7817	-57.1594
19.6	-64.0869	-57.0984								19.6	-64.0869	-57.0984				19.6	-64.0869	-57.0984
19.65	-64.0564	-56.9153								19.65	-64.0564	-56.9153				19.65	-64.0564	-56.9153
19.7	-63.9343	-57.312								19.7	-63.9343	-57.312				19.7	-63.9343	-57.312
19.75	-63.9343	-57.0679								19.75	-63.9343	-57.0679				19.75	-63.9343	-57.0679
19.8	-63.8428	-57.0679								19.8	-63.8428	-57.0679				19.8	-63.8428	-57.0679
19.85	-63.7817	-57.2205								19.85	-63.7817	-57.2205				19.85	-63.7817	-57.2205
19.9	-63.9343	-57.1594								19.9	-63.9343	-57.1594				19.9	-63.9343	-57.1594
19.95	-63.9648	-57.1899								19.95	-63.9648	-57.1899				19.95	-63.9648	-57.1899
20	-63.9648	-57.2205								20	-63.9648	-57.2205				20	-63.9648	-57.2205
20.05	-63.9343	-57.1289								20.05	-63.9343	-57.1289				20.05	-63.9343	-57.1289
20.1	-63.9343	-57.2815								20.1	-63.9343	-57.2815				20.1	-63.9343	-57.2815
20.15	-63.6902	-57.373								20.15	-63.6902	-57.373				20.15	-63.6902	-57.373
20.2	-63.8428	-57.1289								20.2	-63.8428	-57.1289				20.2	-63.8428	-57.1289
20.25	-64.0259	-57.0679								20.25	-64.0259	-57.0679				20.25	-64.0259	-57.0679
20.3	-63.9648	-57.4341								20.3	-63.9648	-57.4341				20.3	-63.9648	-57.4341
20.35	-63.9343	-57.251								20.35	-63.9343	-57.251				20.35	-63.9343	-57.251
20.4	-63.9038	-57.0984								20.4	-63.9038	-57.0984				20.4	-63.9038	-57.0984
20.45	-63.9648	-57.373								20.45	-63.9648	-57.373				20.45	-63.9648	-57.373
20.5	-63.7817	-57.373								20.5	-63.7817	-57.373				20.5	-63.7817	-57.373
20.55	-63.9343	-57.1289								20.55	-63.9343	-57.1289				20.55	-63.9343	-57.1289
20.6	-64.0259	-57.4951								20.6	-64.0259	-57.4951				20.6	-64.0259	-57.4951
20.65	-64.1785	-57.373								20.65	-64.1785	-57.373				20.65	-64.1785	-57.373
20.7	-63.9954	-57.312								20.7	-63.9954	-57.312				20.7	-63.9954	-57.312
20.75	-64.0869	-57.4341								20.75	-64.0869	-57.4341				20.75	-64.0869	-57.4341
20.8	-63.9648	-57.5561								20.8	-63.9648	-57.5561				20.8	-63.9648	-57.5561
20.85	-63.8733	-57.4646								20.85	-63.8733	-57.4646				20.85	-63.8733	-57.4646
20.9	-63.8428	-57.251								20.9	-63.8428	-57.251				20.9	-63.8428	-57.251
20.95	-64.0259	-57.6782								20.95	-64.0259	-57.6782				20.95	-64.0259	-57.6782
21	-64.1479	-57.5867								21	-64.1479	-57.5867				21	-64.1479	-57.5867
21.05	-64.1479	-57.4036								21.05	-64.1479	-57.4036				21.05	-64.1479	-57.4036
21.1	-63.9954	-57.5256								21.1	-63.9954	-57.5256				21.1	-63.9954	-57.5256
21.15	-64.0564	-57.6172								21.15	-64.0564	-57.6172				21.15	-64.0564	-57.6172
21.2	-63.8733	-57.5867								21.2	-63.8733	-57.5867				21.2	-63.8733	-57.5867
21.25	-63.8733	-57.2815								21.25	-63.8733	-57.2815				21.25	-63.8733	-57.2815
21.3	-64.0869	-57.6172								21.3	-64.0869	-57.6172				21.3	-64.0869	-57.6172
21.35	-64.1479	-57.4951								21.35	-64.1479	-57.4951				21.35	-64.1479	-57.4951
21.4	-63.9954	-57.5256								21.4	-63.9954	-57.5256				21.4	-63.9954	-57.5256
21.45	-63.8123	-57.4036								21.45	-63.8123	-57.4036				21.45	-63.8123	-57.4036
21.5	-63.9954	-57.6477								21.5	-63.9954	-57.6477				21.5	-63.9954	-57.6477
21.55	-64.0869	-57.5256								21.55	-64.0869	-57.5256				21.55	-64.0869	-57.5256
21.6	-63.9954	-57.4036								21.6	-63.9954	-57.4036				21.6	-63.9954	-57.4036
21.65	-63.8123	-57.6172								21.65	-63.8123	-57.6172				21.65	-63.8123	-57.6172
21.7	-64.2395	-57.5867								21.7	-64.2395	-57.5867				21.7	-64.2395	-57.5867
21.75	-64.0869	-57.5256								21.75	-64.0869	-57.5256				21.75	-64.0869	-57.5256
21.8	-63.8428	-57.373								21.8	-63.8428	-57.373				21.8	-63.8428	-57.373
21.85	-64.0869	-57.7087								21.85	-64.0869	-57.7087				21.85	-64.0869	-57.7087
21.9	-64.0259	-57.5867								21.9	-64.0259	-57.5867				21.9	-64.0259	-57.5867
21.95	-63.9648	-57.5867								21.95	-63.9648	-57.5867				21.95	-63.9648	-57.5867
22	-63.9648	-57.4036								22	-63.9648	-57.4036				22	-63.9648	-57.4036
22.05	-63.7512	-57.7393								22.05	-63.7512	-57.7393				22.05	-63.7512	-57.7393
22.1	-64.0869	-57.6782								22.1	-64.0869	-57.6782				22.1	-64.0869	-57.6782
22.15	-64.0259	-57.6782								22.15	-64.0259	-57.6782				22.15	-64.0259	-57.6782
22.2	-63.8428	-57.5561								22.2	-63.8428	-57.5561				22.2	-63.8428	-57.5561
22.25	-63.9954	-57.8308								22.25	-63.9954	-57.8308				22.25	-63.9954	-57.8308
22.3	-63.7817	-57.7393								22.3	-63.7817	-57.7393				22.3	-63.7817	-57.7393
22.35	-64.0869	-57.6782								22.35	-64.0869	-57.6782				22.35	-64.0869	-57.6782
22.4	-63.9954	-57.4951								22.4	-63.9954	-57.4951				22.4	-63.9954	-57.4951
22.45	-63.7817	-57.8613								22.45	-63.7817	-57.8613				22.45	-63.7817	-57.8613
22.5	-63.9648	-57.7087								22.5	-63.9648	-57.7087				22.5	-63.9648	-57.7087
22.55	-63.8428	-57.5867								22.55	-63.8428	-57.5867				22.55	-63.8428	-57.5867
22.6	-64.0869	-57.4646								22.6	-64.0869	-57.4646				22.6	-64.0869	-57.4646
22.65	-63.9954	-57.7698								22.65	-63.9954	-57.7698				22.65	-63.9954	-57.7698
22.7	-63.7512	-57.7698								22.7	-63.7512	-57.7698				22.7	-63.7512	-57.7698
22.75	-64.209	-57.7393								22.75	-64.209	-57.7393				22.75	-64.209	-57.7393
22.8	-63.9648	-57.5256								22.8	-63.9648	-57.5256				22.8	-63.9648	-57.5256
22.85	-63.9038	-57.7393								22.85	-63.9038	-57.7393				22.85	-63.9038	-57.7393
22.9	-64.0564	-57.8003								22.9	-64.0564	-57.8003				22.9	-64.0564	-57.8003
22.95	-63.9648	-57.7393								22.95	-63.9648	-57.7393				22.95	-63.9648	-57.7393
23	-64.0869	-57.6477								23	-64.0869	-57.6477				23	-64.0869	-57.6477
23.05	-64.0564	-57.5561								23.05	-64.0564	-57.5561				23.05	-64.0564	-57.5561
23.1	-63.8733	-57.8308								23.1	-63.8733	-57.8308				23.1	-63.8733	-57.8308
23.15	-63.9954	-57.7393								23.15	-63.9954	-57.7393				23.15	-63.9954	-57.7393
23.2	-64.0869	-57.7087								23.2	-64.0869	-57.7087				23.2	-64.0869	-57.7087
23.25	-63.8428	-57.5867								23.25	-63.8428	-57.5867				23.25	-63.8428	-57.5867
23.3	-63.8428	-57.7087								23.3	-63.8428	-57.7087				23.3	-63.8428	-57.7087
23.35	-64.0259	-57.7698								23.35	-64.0259	-57.7698				23.35	-64.0259	-57.7698
23.4	-63.9954	-57.7393								23.4	-63.9954	-57.7393				23.4	-63.9954	-57.7393
23.45	-63.8733	-57.6782								23.45	-63.8733	-57.6782				23.45	-63.8733	-57.6782
23.5	-64.0564	-57.4646								23.5	-64.0564	-57.4646				23.5	-64.0564	-57.4646
23.55	-63.9343	-57.7698								23.55	-63.9343	-57.7698				23.55	-63.9343	-57.7698
23.6	-63.7512	-57.6477								23.6	-63.7512	-57.6477				23.6	-63.7512	-57.6477
23.65	-64.1479	-57.7087								23.65	-64.1479	-57.7087				23.65	-64.1479	-57.7087
23.7	-63.9648	-57.5561								23.7	-63.9648	-57.5561				23.7	-63.9648	-57.5561
23.75	-63.7207	-57.5256								23.75	-63.7207	-57.5256				23.75	-63.7207	-57.5256
23.8	-64.1174	-57.6477								23.8	-64.1174	-57.6477				23.8	-64.1174	-57.6477
23.85	-63.9954	-57.6172								23.85	-63.9954	-57.6172				23.85	-63.9954	-57.6172
23.9	-63.9954	-57.6782								23.9	-63.9954	-57.6782				23.9	-63.9954	-57.6782
23.95	-63.9648	-57.5561								23.95	-63.9648	-57.5561				23.95	-63.9648	-57.5561
24	-64.1479	-57.4341								24	-64.1479	-57.4341				24	-64.1479	-57.4341
24.05	-64.1174	-57.7393								24.05	-64.1174	-57.7393				24.05	-64.1174	-57.7393
24.1	-63.6902	-57.8003								24.1	-63.6902	-57.8003				24.1	-63.6902	-57.8003
24.15	-64.1174	-57.7087								24.15	-64.1174	-57.7087				24.15	-64.1174	-57.7087
24.2	-63.9954	-57.6172								24.2	-63.9954	-57.6172				24.2	-63.9954	-57.6172
24.25	-63.9038	-57.5256								24.25	-63.9038	-57.5256				24.25	-63.9038	-57.5256
24.3	-63.9038	-57.7087								24.3	-63.9038	-57.7087				24.3	-63.9038	-57.7087
24.35	-64.0564	-57.8308								24.35	-64.0564	-57.8308				24.35	-64.0564	-57.8308
24.4	-64.0259	-57.7087								24.4	-64.0259	-57.7087				24.4	-64.0259	-57.7087
24.45	-63.6902	-57.6477								24.45	-63.6902	-57.6477				24.45	-63.6902	-57.6477
24.5	-63.9954	-57.6477								24.5	-63.9954	-57.6477				24.5	-63.9954	-57.6477
24.55	-63.9648	-57.5256								24.55	-63.9648	-57.5256				24.55	-63.9648	-57.5256
24.6	-63.9038	-57.7087								24.6	-63.9038	-57.7087				24.6	-63.9038	-57.7087
24.65	-63.7817	-57.7087								24.65	-63.7817	-57.7087				24.65	-63.7817	-57.7087
24.7	-64.0869	-57.6477								24.7	-64.0869	-57.6477				24.7	-64.0869	-57.6477
24.75	-63.9343	-57.5561								24.75	-63.9343	-57.5561				24.75	-63.9343	-57.5561
24.8	-63.8428	-57.4341								24.8	-63.8428	-57.4341				24.8	-63.8428	-57.4341
24.85	-64.0259	-57.4646								24.85	-64.0259	-57.4646				24.85	-64.0259	-57.4646
24.9	-64.1174	-57.6477								24.9	-64.1174	-57.6477				24.9	-64.1174	-57.6477
24.95	-64.0564	-57.8003								24.95	-64.0564	-57.8003				24.95	-64.0564	-57.8003
25	-63.8428	-57.6477								25	-63.8428	-57.6477				25	-63.8428	-57.6477
25.05	-64.0869	-57.6172								25.05	-64.0869	-57.6172				25.05	-64.0869	-57.6172
25.1	-64.0869	-57.4951								25.1	-64.0869	-57.4951				25.1	-64.0869	-57.4951
25.15	-63.9954	-57.4341								25.15	-63.9954	-57.4341				25.15	-63.9954	-57.4341
25.2	-63.8428	-57.6782								25.2	-63.8428	-57.6782				25.2	-63.8428	-57.6782
25.25	-64.0564	-57.8003								25.25	-64.0564	-57.8003				25.25	-64.0564	-57.8003
25.3	-64.0869	-57.6782								25.3	-64.0869	-57.6782				25.3	-64.0869	-57.6782
25.35	-63.9343	-57.6477								25.35	-63.9343	-57.6477				25.35	-63.9343	-57.6477
25.4	-63.6902	-57.6477								25.4	-63.6902	-57.6477				25.4	-63.6902	-57.6477
25.45	-64.1174	-57.373								25.45	-64.1174	-57.373				25.45	-64.1174	-57.373
25.5	-64.0869	-57.5256								25.5	-64.0869	-57.5256				25.5	-64.0869	-57.5256
25.55	-63.9954	-57.6782								25.55	-63.9954	-57.6782				25.55	-63.9954	-57.6782
25.6	-63.6902	-57.7087								25.6	-63.6902	-57.7087				25.6	-63.6902	-57.7087
25.65	-63.9343	-57.5867								25.65	-63.9343	-57.5867				25.65	-63.9343	-57.5867
25.7	-64.0869	-57.6172								25.7	-64.0869	-57.6172				25.7	-64.0869	-57.6172
25.75	-64.0259	-57.5256								25.75	-64.0259	-57.5256				25.75	-64.0259	-57.5256
25.8	-63.7207	-57.373								25.8	-63.7207	-57.373				25.8	-63.7207	-57.373
25.85	-63.9343	-57.4036								25.85	-63.9343	-57.4036				25.85	-63.9343	-57.4036
25.9	-64.1174	-57.5867								25.9	-64.1174	-57.5867				25.9	-64.1174	-57.5867
25.95	-63.9954	-57.6172								25.95	-63.9954	-57.6172				25.95	-63.9954	-57.6172
26	-63.9038	-57.5867								26	-63.9038	-57.5867				26	-63.9038	-57.5867
26.05	-63.8123	-57.6172								26.05	-63.8123	-57.6172				26.05	-63.8123	-57.6172
26.1	-64.1785	-57.5256								26.1	-64.1785	-57.5256				26.1	-64.1785	-57.5256
26.15	-64.0564	-57.373								26.15	-64.0564	-57.373				26.15	-64.0564	-57.373
26.2	-63.9343	-57.3425								26.2	-63.9343	-57.3425				26.2	-63.9343	-57.3425
26.25	-63.7207	-57.373								26.25	-63.7207	-57.373				26.25	-63.7207	-57.373
26.3	-64.0259	-57.6477								26.3	-64.0259	-57.6477				26.3	-64.0259	-57.6477
26.35	-64.1785	-57.5561								26.35	-64.1785	-57.5561				26.35	-64.1785	-57.5561
26.4	-63.9648	-57.5561								26.4	-63.9648	-57.5561				26.4	-63.9648	-57.5561
26.45	-63.9038	-57.4951								26.45	-63.9038	-57.4951				26.45	-63.9038	-57.4951
26.5	-63.7817	-57.373								26.5	-63.7817	-57.373				26.5	-63.7817	-57.373
26.55	-64.0869	-57.6477								26.55	-64.0869	-57.6477				26.55	-64.0869	-57.6477
26.6	-64.0259	-57.5867								26.6	-64.0259	-57.5867				26.6	-64.0259	-57.5867
26.65	-63.9648	-57.5867								26.65	-63.9648	-57.5867				26.65	-63.9648	-57.5867
26.7	-63.7817	-57.4036								26.7	-63.7817	-57.4036				26.7	-63.7817	-57.4036
26.75	-63.9343	-57.6477								26.75	-63.9343	-57.6477				26.75	-63.9343	-57.6477
26.8	-64.1479	-57.6477								26.8	-64.1479	-57.6477				26.8	-64.1479	-57.6477
26.85	-64.0259	-57.3425								26.85	-64.0259	-57.3425				26.85	-64.0259	-57.3425
26.9	-63.9648	-57.6477								26.9	-63.9648	-57.6477				26.9	-63.9648	-57.6477
26.95	-63.9343	-57.4951								26.95	-63.9343	-57.4951				26.95	-63.9343	-57.4951
27	-63.9954	-57.4646								27	-63.9954	-57.4646				27	-63.9954	-57.4646
27.05	-64.2395	-57.5867								27.05	-64.2395	-57.5867				27.05	-64.2395	-57.5867
27.1	-64.0259	-57.4646								27.1	-64.0259	-57.4646				27.1	-64.0259	-57.4646
27.15	-64.209	-57.5561								27.15	-64.209	-57.5561				27.15	-64.209	-57.5561
27.2	-63.9343	-57.4646								27.2	-63.9343	-57.4646				27.2	-63.9343	-57.4646
27.25	-63.9954	-57.4036								27.25	-63.9954	-57.4036				27.25	-63.9954	-57.4036
27.3	-64.27	-57.5256								27.3	-64.27	-57.5256				27.3	-64.27	-57.5256
27.35	-64.3005	-57.4036								27.35	-64.3005	-57.4036				27.35	-64.3005	-57.4036
27.4	-64.209	-57.6172								27.4	-64.209	-57.6172				27.4	-64.209	-57.6172
27.45	-64.0259	-57.5561								27.45	-64.0259	-57.5561				27.45	-64.0259	-57.5561
27.5	-63.9038	-57.4341								27.5	-63.9038	-57.4341				27.5	-63.9038	-57.4341
27.55	-64.209	-57.5867								27.55	-64.209	-57.5867				27.55	-64.209	-57.5867
27.6	-64.331	-57.3425								27.6	-64.331	-57.3425				27.6	-64.331	-57.3425
27.65	-64.1174	-57.6782								27.65	-64.1174	-57.6782				27.65	-64.1174	-57.6782
27.7	-64.0564	-57.5561								27.7	-64.0564	-57.5561				27.7	-64.0564	-57.5561
27.75	-63.9648	-57.2815								27.75	-63.9648	-57.2815				27.75	-63.9648	-57.2815
27.8	-64.0564	-57.5867								27.8	-64.0564	-57.5867				27.8	-64.0564	-57.5867
27.85	-64.1785	-57.4341								27.85	-64.1785	-57.4341				27.85	-64.1785	-57.4341
27.9	-64.0869	-57.5867								27.9	-64.0869	-57.5867				27.9	-64.0869	-57.5867
27.95	-64.0259	-57.4646								27.95	-64.0259	-57.4646				27.95	-64.0259	-57.4646
28	-64.0869	-57.2205								28	-64.0869	-57.2205				28	-64.0869	-57.2205
28.05	-63.9038	-57.5561								28.05	-63.9038	-57.5561				28.05	-63.9038	-57.5561
28.1	-64.0564	-57.4951								28.1	-64.0564	-57.4951				28.1	-64.0564	-57.4951
28.15	-64.1785	-57.2815								28.15	-64.1785	-57.2815				28.15	-64.1785	-57.2815
28.2	-64.209	-57.5867								28.2	-64.209	-57.5867				28.2	-64.209	-57.5867
28.25	-64.1479	-57.4341								28.25	-64.1479	-57.4341				28.25	-64.1479	-57.4341
28.3	-64.0564	-57.2205								28.3	-64.0564	-57.2205				28.3	-64.0564	-57.2205
28.35	-63.9038	-57.5256								28.35	-63.9038	-57.5256				28.35	-63.9038	-57.5256
28.4	-64.0564	-57.4951								28.4	-64.0564	-57.4951				28.4	-64.0564	-57.4951
28.45	-64.209	-57.1289								28.45	-64.209	-57.1289				28.45	-64.209	-57.1289
28.5	-64.0869	-57.5867								28.5	-64.0869	-57.5867				28.5	-64.0869	-57.5867
28.55	-64.0869	-57.4036								28.55	-64.0869	-57.4036				28.55	-64.0869	-57.4036
28.6	-64.0564	-57.1594								28.6	-64.0564	-57.1594				28.6	-64.0564	-57.1594
28.65	-64.0259	-57.4341								28.65	-64.0259	-57.4341				28.65	-64.0259	-57.4341
28.7	-63.8123	-57.4341								28.7	-63.8123	-57.4341				28.7	-63.8123	-57.4341
28.75	-63.9648	-57.3425								28.75	-63.9648	-57.3425				28.75	-63.9648	-57.3425
28.8	-64.1479	-57.2815								28.8	-64.1479	-57.2815				28.8	-64.1479	-57.2815
28.85	-64.1174	-57.4341								28.85	-64.1174	-57.4341				28.85	-64.1174	-57.4341
28.9	-63.9954	-57.373								28.9	-63.9954	-57.373				28.9	-63.9954	-57.373
28.95	-64.0564	-57.2205								28.95	-64.0564	-57.2205				28.95	-64.0564	-57.2205
29	-63.9038	-57.4036								29	-63.9038	-57.4036				29	-63.9038	-57.4036
29.05	-63.8428	-57.312								29.05	-63.8428	-57.312				29.05	-63.8428	-57.312
29.1	-63.8123	-57.0679								29.1	-63.8123	-57.0679				29.1	-63.8123	-57.0679
29.15	-63.9954	-57.373								29.15	-63.9954	-57.373				29.15	-63.9954	-57.373
29.2	-64.0564	-57.2815								29.2	-64.0564	-57.2815				29.2	-64.0564	-57.2815
29.25	-64.1174	-57.1899								29.25	-64.1174	-57.1899				29.25	-64.1174	-57.1899
29.3	-64.0564	-57.1899								29.3	-64.0564	-57.1899				29.3	-64.0564	-57.1899
29.35	-63.9648	-57.3425								29.35	-63.9648	-57.3425				29.35	-63.9648	-57.3425
29.4	-63.9343	-57.312								29.4	-63.9343	-57.312				29.4	-63.9343	-57.312
29.45	-63.8428	-57.0679								29.45	-63.8428	-57.0679				29.45	-63.8428	-57.0679
29.5	-63.9343	-57.373								29.5	-63.9343	-57.373				29.5	-63.9343	-57.373
29.55	-64.1174	-57.312								29.55	-64.1174	-57.312				29.55	-64.1174	-57.312
29.6	-64.0564	-57.1899								29.6	-64.0564	-57.1899				29.6	-64.0564	-57.1899
29.65	-64.0259	-57.1289								29.65	-64.0259	-57.1289				29.65	-64.0259	-57.1289
29.7	-63.9648	-57.4036								29.7	-63.9648	-57.4036				29.7	-63.9648	-57.4036
29.75	-63.6902	-57.373								29.75	-63.6902	-57.373				29.75	-63.6902	-57.373
29.8	-63.9648	-57.1594								29.8	-63.9648	-57.1594				29.8	-63.9648	-57.1594
29.85	-63.9954	-57.312								29.85	-63.9954	-57.312				29.85	-63.9954	-57.312
29.9	-63.9038	-57.373								29.9	-63.9038	-57.373				29.9	-63.9038	-57.373
29.95	-63.7817	-57.3425								29.95	-63.7817	-57.3425				29.95	-63.7817	-57.3425
30	-64.0564	-57.1594								30	-64.0564	-57.1594				30	-64.0564	-57.1594
30.05	-63.9343	-57.373								30.05	-63.9343	-57.373				30.05	-63.9343	-57.373
30.1	-63.7817	-57.312								30.1	-63.7817	-57.312				30.1	-63.7817	-57.312
30.15	-64.0869	-57.312								30.15	-64.0869	-57.312				30.15	-64.0869	-57.312
30.2	-63.9343	-57.1899								30.2	-63.9343	-57.1899				30.2	-63.9343	-57.1899
30.25	-63.8428	-57.4646								30.25	-63.8428	-57.4646				30.25	-63.8428	-57.4646
30.3	-63.9954	-57.251								30.3	-63.9954	-57.251				30.3	-63.9954	-57.251
30.35	-63.7512	-57.1899								30.35	-63.7512	-57.1899				30.35	-63.7512	-57.1899
30.4	-64.1174	-57.0984								30.4	-64.1174	-57.0984				30.4	-64.1174	-57.0984
30.45	-63.9954	-57.3425								30.45	-63.9954	-57.3425				30.45	-63.9954	-57.3425
30.5	-63.9343	-57.251								30.5	-63.9343	-57.251				30.5	-63.9343	-57.251
30.55	-64.1174	-57.0984								30.55	-64.1174	-57.0984				30.55	-64.1174	-57.0984
30.6	-63.9343	-57.1899								30.6	-63.9343	-57.1899				30.6	-63.9343	-57.1899
30.65	-64.0869	-57.312								30.65	-64.0869	-57.312				30.65	-64.0869	-57.312
30.7	-64.0259	-57.1594								30.7	-64.0259	-57.1594				30.7	-64.0259	-57.1594
30.75	-63.9038	-57.1289								30.75	-63.9038	-57.1289				30.75	-63.9038	-57.1289
30.8	-64.0869	-57.1899								30.8	-64.0869	-57.1899				30.8	-64.0869	-57.1899
30.85	-63.9648	-57.373								30.85	-63.9648	-57.373				30.85	-63.9648	-57.373
30.9	-64.1174	-57.1594								30.9	-64.1174	-57.1594				30.9	-64.1174	-57.1594
30.95	-64.0259	-57.0984								30.95	-64.0259	-57.0984				30.95	-64.0259	-57.0984
31	-63.7512	-57.0984								31	-63.7512	-57.0984				31	-63.7512	-57.0984
31.05	-64.1174	-57.4036								31.05	-64.1174	-57.4036				31.05	-64.1174	-57.4036
31.1	-63.9954	-57.1899								31.1	-63.9954	-57.1899				31.1	-63.9954	-57.1899
31.15	-63.8428	-57.2205								31.15	-63.8428	-57.2205				31.15	-63.8428	-57.2205
31.2	-64.1174	-57.0374								31.2	-64.1174	-57.0374				31.2	-64.1174	-57.0374
31.25	-63.8428	-57.3425								31.25	-63.8428	-57.3425				31.25	-63.8428	-57.3425
31.3	-63.9038	-57.2815								31.3	-63.9038	-57.2815				31.3	-63.9038	-57.2815
31.35	-63.9954	-57.251								31.35	-63.9954	-57.251				31.35	-63.9954	-57.251
31.4	-63.9038	-57.0068								31.4	-63.9038	-57.0068				31.4	-63.9038	-57.0068
31.45	-64.0259	-57.0984								31.45	-64.0259	-57.0984				31.45	-64.0259	-57.0984
31.5	-63.9954	-57.3425								31.5	-63.9954	-57.3425				31.5	-63.9954	-57.3425
31.55	-63.9648	-57.1289								31.55	-63.9648	-57.1289				31.55	-63.9648	-57.1289
31.6	-63.9343	-57.1899								31.6	-63.9343	-57.1899				31.6	-63.9343	-57.1899
31.65	-64.0259	-57.0068								31.65	-64.0259	-57.0068				31.65	-64.0259	-57.0068
31.7	-63.9648	-57.2205								31.7	-63.9648	-57.2205				31.7	-63.9648	-57.2205
31.75	-63.9343	-57.251								31.75	-63.9343	-57.251				31.75	-63.9343	-57.251
31.8	-64.209	-57.2205								31.8	-64.209	-57.2205				31.8	-64.209	-57.2205
31.85	-64.0259	-57.1899								31.85	-64.0259	-57.1899				31.85	-64.0259	-57.1899
31.9	-63.7817	-57.0679								31.9	-63.7817	-57.0679				31.9	-63.7817	-57.0679
31.95	-64.1479	-57.2815								31.95	-64.1479	-57.2815				31.95	-64.1479	-57.2815
32	-64.1174	-57.312								32	-64.1174	-57.312				32	-64.1174	-57.312
32.05	-63.8428	-57.3425								32.05	-63.8428	-57.3425				32.05	-63.8428	-57.3425
32.1	-63.9648	-57.1289								32.1	-63.9648	-57.1289				32.1	-63.9648	-57.1289
32.15	-64.0564	-57.0374								32.15	-64.0564	-57.0374				32.15	-64.0564	-57.0374
32.2	-63.9343	-57.312								32.2	-63.9343	-57.312				32.2	-63.9343	-57.312
32.25	-63.9038	-57.251								32.25	-63.9038	-57.251				32.25	-63.9038	-57.251
32.3	-64.0869	-57.251								32.3	-64.0869	-57.251				32.3	-64.0869	-57.251
32.35	-63.9343	-57.0374								32.35	-63.9343	-57.0374				32.35	-63.9343	-57.0374
32.4	-63.7512	-57.0374								32.4	-63.7512	-57.0374				32.4	-63.7512	-57.0374
32.45	-64.0259	-57.312								32.45	-64.0259	-57.312				32.45	-64.0259	-57.312
32.5	-63.8733	-57.312								32.5	-63.8733	-57.312				32.5	-63.8733	-57.312
32.55	-63.8123	-57.2205								32.55	-63.8123	-57.2205				32.55	-63.8123	-57.2205
32.6	-63.9038	-57.0679								32.6	-63.9038	-57.0679				32.6	-63.9038	-57.0679
32.65	-64.1174	-57.0374								32.65	-64.1174	-57.0374				32.65	-64.1174	-57.0374
32.7	-63.9954	-57.1899								32.7	-63.9954	-57.1899				32.7	-63.9954	-57.1899
32.75	-63.7817	-57.2205								32.75	-63.7817	-57.2205				32.75	-63.7817	-57.2205
32.8	-64.1174	-57.2205								32.8	-64.1174	-57.2205				32.8	-64.1174	-57.2205
32.85	-64.1479	-57.0984								32.85	-64.1479	-57.0984				32.85	-64.1479	-57.0984
32.9	-63.9038	-57.0679								32.9	-63.9038	-57.0679				32.9	-63.9038	-57.0679
32.95	-63.7817	-57.1289								32.95	-63.7817	-57.1289				32.95	-63.7817	-57.1289
33	-64.0869	-57.251								33	-64.0869	-57.251				33	-64.0869	-57.251
33.05	-64.0564	-57.2205								33.05	-64.0564	-57.2205				33.05	-64.0564	-57.2205
33.1	-63.8123	-57.312								33.1	-63.8123	-57.312				33.1	-63.8123	-57.312
33.15	-63.8123	-57.1899								33.15	-63.8123	-57.1899				33.15	-63.8123	-57.1899
33.2	-64.1479	-57.0374								33.2	-64.1479	-57.0374				33.2	-64.1479	-57.0374
33.25	-63.9954	-57.1594								33.25	-63.9954	-57.1594				33.25	-63.9954	-57.1594
33.3	-63.8428	-57.373								33.3	-63.8428	-57.373				33.3	-63.8428	-57.373
33.35	-63.8428	-57.4341								33.35	-63.8428	-57.4341				33.35	-63.8428	-57.4341
33.4	-64.0564	-57.2815								33.4	-64.0564	-57.2815				33.4	-64.0564	-57.2815
33.45	-63.9648	-57.2815								33.45	-63.9648	-57.2815				33.45	-63.9648	-57.2815
33.5	-63.8428	-57.1289								33.5	-63.8428	-57.1289				33.5	-63.8428	-57.1289
33.55	-63.9038	-57.2205								33.55	-63.9038	-57.2205				33.55	-63.9038	-57.2205
33.6	-63.9954	-57.373								33.6	-63.9954	-57.373				33.6	-63.9954	-57.373
33.65	-63.9648	-57.4036								33.65	-63.9648	-57.4036				33.65	-63.9648	-57.4036
33.7	-63.7817	-57.312								33.7	-63.7817	-57.312				33.7	-63.7817	-57.312
33.75	-63.8428	-57.4036								33.75	-63.8428	-57.4036				33.75	-63.8428	-57.4036
33.8	-64.0564	-57.251								33.8	-64.0564	-57.251				33.8	-64.0564	-57.251
33.85	-64.0564	-57.0984								33.85	-64.0564	-57.0984				33.85	-64.0564	-57.0984
33.9	-63.7512	-57.251								33.9	-63.7512	-57.251				33.9	-63.7512	-57.251
33.95	-63.8428	-57.4036								33.95	-63.8428	-57.4036				33.95	-63.8428	-57.4036
34	-64.0869	-57.4341								34	-64.0869	-57.4341				34	-64.0869	-57.4341
34.05	-63.9954	-57.3425								34.05	-63.9954	-57.3425				34.05	-63.9954	-57.3425
34.1	-63.9038	-57.4341								34.1	-63.9038	-57.4341				34.1	-63.9038	-57.4341
34.15	-63.6902	-57.312								34.15	-63.6902	-57.312				34.15	-63.6902	-57.312
34.2	-63.9954	-57.251								34.2	-63.9954	-57.251				34.2	-63.9954	-57.251
34.25	-63.8733	-57.251								34.25	-63.8733	-57.251				34.25	-63.8733	-57.251
34.3	-63.9038	-57.4646								34.3	-63.9038	-57.4646				34.3	-63.9038	-57.4646
34.35	-63.6597	-57.6172								34.35	-63.6597	-57.6172				34.35	-63.6597	-57.6172
34.4	-63.9038	-57.5867								34.4	-63.9038	-57.5867				34.4	-63.9038	-57.5867
34.45	-63.9648	-57.373								34.45	-63.9648	-57.373				34.45	-63.9648	-57.373
34.5	-63.9038	-57.4036								34.5	-63.9038	-57.4036				34.5	-63.9038	-57.4036
34.55	-63.6597	-57.373								34.55	-63.6597	-57.373				34.55	-63.6597	-57.373
34.6	-63.7207	-57.1594								34.6	-63.7207	-57.1594				34.6	-63.7207	-57.1594
34.65	-63.8733	-57.251								34.65	-63.8733	-57.251				34.65	-63.8733	-57.251
34.7	-63.8733	-57.4951								34.7	-63.8733	-57.4951				34.7	-63.8733	-57.4951
34.75	-63.8123	-57.4646								34.75	-63.8123	-57.4646				34.75	-63.8123	-57.4646
34.8	-63.5681	-57.4341								34.8	-63.5681	-57.4341				34.8	-63.5681	-57.4341
34.85	-63.8733	-57.2205								34.85	-63.8733	-57.2205				34.85	-63.8733	-57.2205
34.9	-63.9648	-57.1594								34.9	-63.9648	-57.1594				34.9	-63.9648	-57.1594
34.95	-63.9038	-57.4646								34.95	-63.9038	-57.4646				34.95	-63.9038	-57.4646
35	-63.7512	-57.3425								35	-63.7512	-57.3425				35	-63.7512	-57.3425
35.05	-63.5986	-57.1899								35.05	-63.5986	-57.1899				35.05	-63.5986	-57.1899
35.1	-63.9954	-57.312								35.1	-63.9954	-57.312				35.1	-63.9954	-57.312
35.15	-63.9343	-57.312								35.15	-63.9343	-57.312				35.15	-63.9343	-57.312
35.2	-63.8733	-57.2815								35.2	-63.8733	-57.2815				35.2	-63.8733	-57.2815
35.25	-63.7817	-57.312								35.25	-63.7817	-57.312				35.25	-63.7817	-57.312
35.3	-63.6902	-57.3425								35.3	-63.6902	-57.3425				35.3	-63.6902	-57.3425
35.35	-63.9954	-57.1289								35.35	-63.9954	-57.1289				35.35	-63.9954	-57.1289
35.4	-63.9343	-57.4646								35.4	-63.9343	-57.4646				35.4	-63.9343	-57.4646
35.45	-63.8123	-57.2815								35.45	-63.8123	-57.2815				35.45	-63.8123	-57.2815
35.5	-63.7512	-57.0679								35.5	-63.7512	-57.0679				35.5	-63.7512	-57.0679
35.55	-63.5681	-57.312								35.55	-63.5681	-57.312				35.55	-63.5681	-57.312
35.6	-63.8428	-57.0984								35.6	-63.8428	-57.0984				35.6	-63.8428	-57.0984
35.65	-63.8123	-57.4646								35.65	-63.8123	-57.4646				35.65	-63.8123	-57.4646
35.7	-63.8428	-57.312								35.7	-63.8428	-57.312				35.7	-63.8428	-57.312
35.75	-63.8123	-57.0679								35.75	-63.8123	-57.0679				35.75	-63.8123	-57.0679
35.8	-63.6291	-57.251								35.8	-63.6291	-57.251				35.8	-63.6291	-57.251
35.85	-63.8123	-56.9763								35.85	-63.8123	-56.9763				35.85	-63.8123	-56.9763
35.9	-63.9038	-57.3425								35.9	-63.9038	-57.3425				35.9	-63.9038	-57.3425
35.95	-63.9038	-57.1899								35.95	-63.9038	-57.1899				35.95	-63.9038	-57.1899
36	-63.8733	-57.0068								36	-63.8733	-57.0068				36	-63.8733	-57.0068
36.05	-63.7817	-57.1899								36.05	-63.7817	-57.1899				36.05	-63.7817	-57.1899
36.1	-63.6902	-57.1289								36.1	-63.6902	-57.1289				36.1	-63.6902	-57.1289
36.15	-63.9038	-57.1899								36.15	-63.9038	-57.1899				36.15	-63.9038	-57.1899
36.2	-64.0564	-57.0984								36.2	-64.0564	-57.0984				36.2	-64.0564	-57.0984
36.25	-63.9038	-56.9458								36.25	-63.9038	-56.9458				36.25	-63.9038	-56.9458
36.3	-63.9648	-57.2205								36.3	-63.9648	-57.2205				36.3	-63.9648	-57.2205
36.35	-63.8428	-57.1899								36.35	-63.8428	-57.1899				36.35	-63.8428	-57.1899
36.4	-63.8733	-56.8848								36.4	-63.8733	-56.8848				36.4	-63.8733	-56.8848
36.45	-63.9343	-57.312								36.45	-63.9343	-57.312				36.45	-63.9343	-57.312
36.5	-64.0259	-57.2205								36.5	-64.0259	-57.2205				36.5	-64.0259	-57.2205
36.55	-63.9954	-56.9153								36.55	-63.9954	-56.9153				36.55	-63.9954	-56.9153
36.6	-63.9648	-57.373								36.6	-63.9648	-57.373				36.6	-63.9648	-57.373
36.65	-63.9038	-57.1594								36.65	-63.9038	-57.1594				36.65	-63.9038	-57.1594
36.7	-63.7512	-57.0068								36.7	-63.7512	-57.0068				36.7	-63.7512	-57.0068
36.75	-63.7817	-57.1899								36.75	-63.7817	-57.1899				36.75	-63.7817	-57.1899
36.8	-64.0259	-57.2205								36.8	-64.0259	-57.2205				36.8	-64.0259	-57.2205
36.85	-64.0564	-56.9763								36.85	-64.0564	-56.9763				36.85	-64.0564	-56.9763
36.9	-63.9343	-57.251								36.9	-63.9343	-57.251				36.9	-63.9343	-57.251
36.95	-63.9343	-57.1594								36.95	-63.9343	-57.1594				36.95	-63.9343	-57.1594
37	-63.8428	-56.8542								37	-63.8428	-56.8542				37	-63.8428	-56.8542
37.05	-63.8123	-57.1899								37.05	-63.8123	-57.1899				37.05	-63.8123	-57.1899
37.1	-63.8428	-57.1289								37.1	-63.8428	-57.1289				37.1	-63.8428	-57.1289
37.15	-64.1174	-57.0679								37.15	-64.1174	-57.0679				37.15	-64.1174	-57.0679
37.2	-64.1479	-56.9763								37.2	-64.1479	-56.9763				37.2	-64.1479	-56.9763
37.25	-64.0869	-57.1594								37.25	-64.0869	-57.1594				37.25	-64.0869	-57.1594
37.3	-63.9954	-57.1594								37.3	-63.9954	-57.1594				37.3	-63.9954	-57.1594
37.35	-64.0259	-56.9153								37.35	-64.0259	-56.9153				37.35	-64.0259	-56.9153
37.4	-63.9038	-57.2205								37.4	-63.9038	-57.2205				37.4	-63.9038	-57.2205
37.45	-63.9648	-57.0984								37.45	-63.9648	-57.0984				37.45	-63.9648	-57.0984
37.5	-63.9954	-57.0679								37.5	-63.9954	-57.0679				37.5	-63.9954	-57.0679
37.55	-64.1174	-57.1594								37.55	-64.1174	-57.1594				37.55	-64.1174	-57.1594
37.6	-64.1174	-57.1594								37.6	-64.1174	-57.1594				37.6	-64.1174	-57.1594
37.65	-63.9954	-57.1594								37.65	-63.9954	-57.1594				37.65	-63.9954	-57.1594
37.7	-64.0259	-56.9153								37.7	-64.0259	-56.9153				37.7	-64.0259	-56.9153
37.75	-63.9343	-57.3425								37.75	-63.9343	-57.3425				37.75	-63.9343	-57.3425
37.8	-63.7512	-57.1289								37.8	-63.7512	-57.1289				37.8	-63.7512	-57.1289
37.85	-63.9343	-57.0068								37.85	-63.9343	-57.0068				37.85	-63.9343	-57.0068
37.9	-64.1174	-57.0374								37.9	-64.1174	-57.0374				37.9	-64.1174	-57.0374
37.95	-63.9954	-57.2205								37.95	-63.9954	-57.2205				37.95	-63.9954	-57.2205
38	-63.9954	-57.1289								38	-63.9954	-57.1289				38	-63.9954	-57.1289
38.05	-63.9038	-56.7932								38.05	-63.9038	-56.7932				38.05	-63.9038	-56.7932
38.1	-63.8733	-57.2205								38.1	-63.8733	-57.2205				38.1	-63.8733	-57.2205
38.15	-64.0869	-57.1594								38.15	-64.0869	-57.1594				38.15	-64.0869	-57.1594
38.2	-63.9038	-57.0984								38.2	-63.9038	-57.0984				38.2	-63.9038	-57.0984
38.25	-63.8733	-56.8542								38.25	-63.8733	-56.8542				38.25	-63.8733	-56.8542
38.3	-64.0564	-57.1594								38.3	-64.0564	-57.1594				38.3	-64.0564	-57.1594
38.35	-64.0869	-57.0679								38.35	-64.0869	-57.0679				38.35	-64.0869	-57.0679
38.4	-63.9038	-57.0068								38.4	-63.9038	-57.0068				38.4	-63.9038	-57.0068
38.45	-63.9954	-56.9458								38.45	-63.9954	-56.9458				38.45	-63.9954	-56.9458
38.5	-64.0564	-57.1289								38.5	-64.0564	-57.1289				38.5	-64.0564	-57.1289
38.55	-63.8428	-57.1899								38.55	-63.8428	-57.1899				38.55	-63.8428	-57.1899
38.6	-64.0259	-57.0374								38.6	-64.0259	-57.0374				38.6	-64.0259	-57.0374
38.65	-64.0259	-56.9763								38.65	-64.0259	-56.9763				38.65	-64.0259	-56.9763
38.7	-63.8123	-57.251								38.7	-63.8123	-57.251				38.7	-63.8123	-57.251
38.75	-64.0869	-57.1594								38.75	-64.0869	-57.1594				38.75	-64.0869	-57.1594
38.8	-63.8123	-57.0374								38.8	-63.8123	-57.0374				38.8	-63.8123	-57.0374
38.85	-64.0259	-56.9763								38.85	-64.0259	-56.9763				38.85	-64.0259	-56.9763
38.9	-63.9954	-57.1899								38.9	-63.9954	-57.1899				38.9	-63.9954	-57.1899
38.95	-63.7512	-57.0984								38.95	-63.7512	-57.0984				38.95	-63.7512	-57.0984
39	-64.0564	-57.0679								39	-64.0564	-57.0679				39	-64.0564	-57.0679
39.05	-63.8733	-56.9763								39.05	-63.8733	-56.9763				39.05	-63.8733	-56.9763
39.1	-64.0564	-57.2205								39.1	-64.0564	-57.2205				39.1	-64.0564	-57.2205
39.15	-64.0259	-57.0984								39.15	-64.0259	-57.0984				39.15	-64.0259	-57.0984
39.2	-63.6902	-57.0679								39.2	-63.6902	-57.0679				39.2	-63.6902	-57.0679
39.25	-64.0259	-56.9153								39.25	-64.0259	-56.9153				39.25	-64.0259	-56.9153
39.3	-63.9038	-57.0984								39.3	-63.9038	-57.0984				39.3	-63.9038	-57.0984
39.35	-63.9648	-57.0679								39.35	-63.9648	-57.0679				39.35	-63.9648	-57.0679
39.4	-63.9954	-57.0374								39.4	-63.9954	-57.0374				39.4	-63.9954	-57.0374
39.45	-63.6597	-56.8848								39.45	-63.6597	-56.8848				39.45	-63.6597	-56.8848
39.5	-64.0564	-57.0984								39.5	-64.0564	-57.0984				39.5	-64.0564	-57.0984
39.55	-64.0869	-57.1594								39.55	-64.0869	-57.1594				39.55	-64.0869	-57.1594
39.6	-63.6597	-57.1594								39.6	-63.6597	-57.1594				39.6	-63.6597	-57.1594
39.65	-64.0869	-56.9458								39.65	-64.0869	-56.9458				39.65	-64.0869	-56.9458
39.7	-63.9954	-56.9763								39.7	-63.9954	-56.9763				39.7	-63.9954	-56.9763
39.75	-63.6597	-57.2205								39.75	-63.6597	-57.2205				39.75	-63.6597	-57.2205
39.8	-63.9954	-57.1899								39.8	-63.9954	-57.1899				39.8	-63.9954	-57.1899
39.85	-63.9038	-57.0374								39.85	-63.9038	-57.0374				39.85	-63.9038	-57.0374
39.9	-63.6902	-56.8542								39.9	-63.6902	-56.8542				39.9	-63.6902	-56.8542
39.95	-63.9343	-57.0984								39.95	-63.9343	-57.0984				39.95	-63.9343	-57.0984
40	-63.9343	-57.1899								40	-63.9343	-57.1899				40	-63.9343	-57.1899
40.05	-63.6597	-57.1899								40.05	-63.6597	-57.1899				40.05	-63.6597	-57.1899
40.1	-63.9038	-56.9763								40.1	-63.9038	-56.9763				40.1	-63.9038	-56.9763
40.15	-63.8428	-56.8237								40.15	-63.8428	-56.8237				40.15	-63.8428	-56.8237
40.2	-63.6902	-57.0679								40.2	-63.6902	-57.0679				40.2	-63.6902	-57.0679
40.25	-63.8733	-57.1289								40.25	-63.8733	-57.1289				40.25	-63.8733	-57.1289
40.3	-63.9038	-56.9763								40.3	-63.9038	-56.9763				40.3	-63.9038	-56.9763
40.35	-63.9343	-56.8542								40.35	-63.9343	-56.8542				40.35	-63.9343	-56.8542
40.4	-63.7207	-56.7627								40.4	-63.7207	-56.7627				40.4	-63.7207	-56.7627
40.45	-64.0869	-57.0374								40.45	-64.0869	-57.0374				40.45	-64.0869	-57.0374
40.5	-63.9038	-56.9763								40.5	-63.9038	-56.9763				40.5	-63.9038	-56.9763
40.55	-63.7207	-56.8848								40.55	-63.7207	-56.8848				40.55	-63.7207	-56.8848
40.6	-63.9954	-56.7627								40.6	-63.9954	-56.7627				40.6	-63.9954	-56.7627
40.65	-63.9343	-56.7017								40.65	-63.9343	-56.7017				40.65	-63.9343	-56.7017
40.7	-63.8428	-56.8542								40.7	-63.8428	-56.8542				40.7	-63.8428	-56.8542
40.75	-63.9343	-56.9763								40.75	-63.9343	-56.9763				40.75	-63.9343	-56.9763
40.8	-64.0564	-56.8237								40.8	-64.0564	-56.8237				40.8	-64.0564	-56.8237
40.85	-63.8733	-56.9153								40.85	-63.8733	-56.9153				40.85	-63.8733	-56.9153
40.9	-63.5986	-56.6406								40.9	-63.5986	-56.6406				40.9	-63.5986	-56.6406
40.95	-64.0564	-56.7932								40.95	-64.0564	-56.7932				40.95	-64.0564	-56.7932
41	-63.9648	-57.0068								41	-63.9648	-57.0068				41	-63.9648	-57.0068
41.05	-63.8123	-56.9153								41.05	-63.8123	-56.9153				41.05	-63.8123	-56.9153
41.1	-63.7817	-56.9458								41.1	-63.7817	-56.9458				41.1	-63.7817	-56.9458
41.15	-64.0564	-56.7322								41.15	-64.0564	-56.7322				41.15	-64.0564	-56.7322
41.2	-63.8733	-56.6406								41.2	-63.8733	-56.6406				41.2	-63.8733	-56.6406
41.25	-63.6597	-56.9153								41.25	-63.6597	-56.9153				41.25	-63.6597	-56.9153
41.3	-63.9343	-56.9763								41.3	-63.9343	-56.9763				41.3	-63.9343	-56.9763
41.35	-63.8428	-56.7932								41.35	-63.8428	-56.7932				41.35	-63.8428	-56.7932
41.4	-63.9038	-56.8848								41.4	-63.9038	-56.8848				41.4	-63.9038	-56.8848
41.45	-63.7817	-56.7627								41.45	-63.7817	-56.7627				41.45	-63.7817	-56.7627
41.5	-64.0259	-56.6711								41.5	-64.0259	-56.6711				41.5	-64.0259	-56.6711
41.55	-63.8733	-56.8542								41.55	-63.8733	-56.8542				41.55	-63.8733	-56.8542
41.6	-63.9648	-56.9763								41.6	-63.9648	-56.9763				41.6	-63.9648	-56.9763
41.65	-63.7817	-56.7932								41.65	-63.7817	-56.7932				41.65	-63.7817	-56.7932
41.7	-63.9648	-56.8542								41.7	-63.9648	-56.8542				41.7	-63.9648	-56.8542
41.75	-63.9343	-56.7627								41.75	-63.9343	-56.7627				41.75	-63.9343	-56.7627
41.8	-63.8123	-56.6406								41.8	-63.8123	-56.6406				41.8	-63.8123	-56.6406
41.85	-63.8123	-56.6101								41.85	-63.8123	-56.6101				41.85	-63.8123	-56.6101
41.9	-63.9038	-56.8848								41.9	-63.9038	-56.8848				41.9	-63.9038	-56.8848
41.95	-63.8733	-56.8542								41.95	-63.8733	-56.8542				41.95	-63.8733	-56.8542
42	-63.7207	-56.8237								42	-63.7207	-56.8237				42	-63.7207	-56.8237
42.05	-63.7817	-56.7322								42.05	-63.7817	-56.7322				42.05	-63.7817	-56.7322
42.1	-63.9648	-56.7017								42.1	-63.9648	-56.7017				42.1	-63.9648	-56.7017
42.15	-63.8733	-56.5491								42.15	-63.8733	-56.5491				42.15	-63.8733	-56.5491
42.2	-63.7817	-56.6406								42.2	-63.7817	-56.6406				42.2	-63.7817	-56.6406
42.25	-63.7207	-56.8237								42.25	-63.7207	-56.8237				42.25	-63.7207	-56.8237
42.3	-63.9648	-56.8848								42.3	-63.9648	-56.8848				42.3	-63.9648	-56.8848
42.35	-63.8428	-56.7627								42.35	-63.8428	-56.7627				42.35	-63.8428	-56.7627
42.4	-63.7207	-56.7627								42.4	-63.7207	-56.7627				42.4	-63.7207	-56.7627
42.45	-63.6597	-56.6711								42.45	-63.6597	-56.6711				42.45	-63.6597	-56.6711
42.5	-63.9648	-56.5491								42.5	-63.9648	-56.5491				42.5	-63.9648	-56.5491
42.55	-63.8733	-56.6101								42.55	-63.8733	-56.6101				42.55	-63.8733	-56.6101
42.6	-63.8123	-56.7627								42.6	-63.8123	-56.7627				42.6	-63.8123	-56.7627
42.65	-63.6902	-56.7932								42.65	-63.6902	-56.7932				42.65	-63.6902	-56.7932
42.7	-63.9343	-56.7627								42.7	-63.9343	-56.7627				42.7	-63.9343	-56.7627
42.75	-63.8733	-56.7017								42.75	-63.8733	-56.7017				42.75	-63.8733	-56.7017
42.8	-63.9038	-56.8237								42.8	-63.9038	-56.8237				42.8	-63.9038	-56.8237
42.85	-63.8123	-56.6711								42.85	-63.8123	-56.6711				42.85	-63.8123	-56.6711
42.9	-63.8733	-56.4575								42.9	-63.8733	-56.4575				42.9	-63.8733	-56.4575
42.95	-63.9954	-56.7017								42.95	-63.9954	-56.7017				42.95	-63.9954	-56.7017
43	-63.9038	-56.8848								43	-63.9038	-56.8848				43	-63.9038	-56.8848
43.05	-63.9038	-56.7932								43.05	-63.9038	-56.7932				43.05	-63.9038	-56.7932
43.1	-63.7817	-56.6711								43.1	-63.7817	-56.6711				43.1	-63.7817	-56.6711
43.15	-63.9038	-56.7627								43.15	-63.9038	-56.7627				43.15	-63.9038	-56.7627
43.2	-63.9954	-56.6406								43.2	-63.9954	-56.6406				43.2	-63.9954	-56.6406
43.25	-64.0564	-56.8542								43.25	-64.0564	-56.8542				43.25	-64.0564	-56.8542
43.3	-63.8428	-56.8848								43.3	-63.8428	-56.8848				43.3	-63.8428	-56.8848
43.35	-63.6902	-56.7017								43.35	-63.6902	-56.7017				43.35	-63.6902	-56.7017
43.4	-63.9954	-56.8542								43.4	-63.9954	-56.8542				43.4	-63.9954	-56.8542
43.45	-63.9648	-56.9153								43.45	-63.9648	-56.9153				43.45	-63.9648	-56.9153
43.5	-64.0259	-56.7017								43.5	-64.0259	-56.7017				43.5	-64.0259	-56.7017
43.55	-63.8733	-56.7322								43.55	-63.8733	-56.7322				43.55	-63.8733	-56.7322
43.6	-63.7817	-56.9153								43.6	-63.7817	-56.9153				43.6	-63.7817	-56.9153
43.65	-64.0564	-56.7017								43.65	-64.0564	-56.7017				43.65	-64.0564	-56.7017
43.7	-64.2395	-56.8848								43.7	-64.2395	-56.8848				43.7	-64.2395	-56.8848
43.75	-64.0869	-56.8848								43.75	-64.0869	-56.8848				43.75	-64.0869	-56.8848
43.8	-63.9648	-56.6101								43.8	-63.9648	-56.6101				43.8	-63.9648	-56.6101
43.85	-63.8123	-56.9763								43.85	-63.8123	-56.9763				43.85	-63.8123	-56.9763
43.9	-64.1479	-56.7627								43.9	-64.1479	-56.7627				43.9	-64.1479	-56.7627
43.95	-64.1785	-56.8542								43.95	-64.1785	-56.8542				43.95	-64.1785	-56.8542
44	-64.0259	-56.8848								44	-64.0259	-56.8848				44	-64.0259	-56.8848
44.05	-63.9648	-56.7017								44.05	-63.9648	-56.7017				44.05	-63.9648	-56.7017
44.1	-63.8428	-57.0068								44.1	-63.8428	-57.0068				44.1	-63.8428	-57.0068
44.15	-64.1174	-56.8542								44.15	-64.1174	-56.8542				44.15	-64.1174	-56.8542
44.2	-64.1174	-57.0374								44.2	-64.1174	-57.0374				44.2	-64.1174	-57.0374
44.25	-64.0259	-56.9458								44.25	-64.0259	-56.9458				44.25	-64.0259	-56.9458
44.3	-64.0869	-56.6711								44.3	-64.0869	-56.6711				44.3	-64.0869	-56.6711
44.35	-63.9038	-57.0068								44.35	-63.9038	-57.0068				44.35	-63.9038	-57.0068
44.4	-63.9038	-56.8237								44.4	-63.9038	-56.8237				44.4	-63.9038	-56.8237
44.45	-63.9954	-56.9763								44.45	-63.9954	-56.9763				44.45	-63.9954	-56.9763
44.5	-64.0869	-56.9153								44.5	-64.0869	-56.9153				44.5	-64.0869	-56.9153
44.55	-64.0564	-56.6711								44.55	-64.0564	-56.6711				44.55	-64.0564	-56.6711
44.6	-64.0259	-57.0679								44.6	-64.0259	-57.0679				44.6	-64.0259	-57.0679
44.65	-63.8428	-57.0068								44.65	-63.8428	-57.0068				44.65	-63.8428	-57.0068
44.7	-63.8733	-56.7322								44.7	-63.8733	-56.7322				44.7	-63.8733	-56.7322
44.75	-64.1479	-56.9763								44.75	-64.1479	-56.9763				44.75	-64.1479	-56.9763
44.8	-64.1785	-56.9763								44.8	-64.1785	-56.9763				44.8	-64.1785	-56.9763
44.85	-64.0259	-56.7017								44.85	-64.0259	-56.7017				44.85	-64.0259	-56.7017
44.9	-64.1174	-57.0374								44.9	-64.1174	-57.0374				44.9	-64.1174	-57.0374
44.95	-64.0564	-56.9153								44.95	-64.0564	-56.9153				44.95	-64.0564	-56.9153
45	-63.9038	-56.6101								45	-63.9038	-56.6101				45	-63.9038	-56.6101
45.05	-64.1174	-57.0679								45.05	-64.1174	-57.0679				45.05	-64.1174	-57.0679
45.1	-64.2395	-56.9153								45.1	-64.2395	-56.9153				45.1	-64.2395	-56.9153
45.15	-64.27	-56.6711								45.15	-64.27	-56.6711				45.15	-64.27	-56.6711
45.2	-64.1785	-57.0068								45.2	-64.1785	-57.0068				45.2	-64.1785	-57.0068
45.25	-64.0259	-56.9458								45.25	-64.0259	-56.9458				45.25	-64.0259	-56.9458
45.3	-63.9954	-56.7932								45.3	-63.9954	-56.7932				45.3	-63.9954	-56.7932
45.35	-64.0259	-57.0068								45.35	-64.0259	-57.0068				45.35	-64.0259	-57.0068
45.4	-64.2395	-57.0068								45.4	-64.2395	-57.0068				45.4	-64.2395	-57.0068
45.45	-64.2395	-57.0068								45.45	-64.2395	-57.0068				45.45	-64.2395	-57.0068
45.5	-64.1479	-56.8848								45.5	-64.1479	-56.8848				45.5	-64.1479	-56.8848
45.55	-64.1479	-57.0984								45.55	-64.1479	-57.0984				45.55	-64.1479	-57.0984
45.6	-64.0564	-57.0374								45.6	-64.0564	-57.0374				45.6	-64.0564	-57.0374
45.65	-63.9343	-56.7932								45.65	-63.9343	-56.7932				45.65	-63.9343	-56.7932
45.7	-63.9648	-57.1899								45.7	-63.9648	-57.1899				45.7	-63.9648	-57.1899
45.75	-64.0869	-57.0068								45.75	-64.0869	-57.0068				45.75	-64.0869	-57.0068
45.8	-64.3005	-56.8848								45.8	-64.3005	-56.8848				45.8	-64.3005	-56.8848
45.85	-64.1479	-56.9763								45.85	-64.1479	-56.9763				45.85	-64.1479	-56.9763
45.9	-64.1479	-57.0679								45.9	-64.1479	-57.0679				45.9	-64.1479	-57.0679
45.95	-64.1174	-57.0068								45.95	-64.1174	-57.0068				45.95	-64.1174	-57.0068
46	-64.0869	-56.7932								46	-64.0869	-56.7932				46	-64.0869	-56.7932
46.05	-64.0259	-57.1289								46.05	-64.0259	-57.1289				46.05	-64.0259	-57.1289
46.1	-63.9648	-57.0679								46.1	-63.9648	-57.0679				46.1	-63.9648	-57.0679
46.15	-64.1479	-56.9458								46.15	-64.1479	-56.9458				46.15	-64.1479	-56.9458
46.2	-64.209	-56.9458								46.2	-64.209	-56.9458				46.2	-64.209	-56.9458
46.25	-64.1785	-57.0679								46.25	-64.1785	-57.0679				46.25	-64.1785	-57.0679
46.3	-64.1479	-56.9763								46.3	-64.1479	-56.9763				46.3	-64.1479	-56.9763
46.35	-64.0869	-56.8237								46.35	-64.0869	-56.8237				46.35	-64.0869	-56.8237
46.4	-63.9954	-57.0679								46.4	-63.9954	-57.0679				46.4	-63.9954	-57.0679
46.45	-64.3005	-56.9458								46.45	-64.3005	-56.9458				46.45	-64.3005	-56.9458
46.5	-64.0869	-57.0984								46.5	-64.0869	-57.0984				46.5	-64.0869	-57.0984
46.55	-63.9648	-56.7932								46.55	-63.9648	-56.7932				46.55	-63.9648	-56.7932
46.6	-64.0564	-57.0679								46.6	-64.0564	-57.0679				46.6	-64.0564	-57.0679
46.65	-64.1785	-57.0679								46.65	-64.1785	-57.0679				46.65	-64.1785	-57.0679
46.7	-64.1174	-56.9153								46.7	-64.1174	-56.9153				46.7	-64.1174	-56.9153
46.75	-63.9038	-56.9763								46.75	-63.9038	-56.9763				46.75	-63.9038	-56.9763
46.8	-64.1479	-57.0984								46.8	-64.1479	-57.0984				46.8	-64.1479	-57.0984
46.85	-64.0259	-57.0068								46.85	-64.0259	-57.0068				46.85	-64.0259	-57.0068
46.9	-63.9954	-56.8542								46.9	-63.9954	-56.8542				46.9	-63.9954	-56.8542
46.95	-64.0869	-56.9763								46.95	-64.0869	-56.9763				46.95	-64.0869	-56.9763
47	-63.8428	-57.0068								47	-63.8428	-57.0068				47	-63.8428	-57.0068
47.05	-64.27	-56.9153								47.05	-64.27	-56.9153				47.05	-64.27	-56.9153
47.1	-64.1174	-56.7322								47.1	-64.1174	-56.7322				47.1	-64.1174	-56.7322
47.15	-63.8733	-56.8542								47.15	-63.8733	-56.8542				47.15	-63.8733	-56.8542
47.2	-64.1479	-57.0374								47.2	-64.1479	-57.0374				47.2	-64.1479	-57.0374
47.25	-63.9648	-56.9153								47.25	-63.9648	-56.9153				47.25	-63.9648	-56.9153
47.3	-64.209	-56.6101								47.3	-64.209	-56.6101				47.3	-64.209	-56.6101
47.35	-64.1479	-56.8542								47.35	-64.1479	-56.8542				47.35	-64.1479	-56.8542
47.4	-63.9343	-57.0068								47.4	-63.9343	-57.0068				47.4	-63.9343	-57.0068
47.45	-64.1785	-56.9458								47.45	-64.1785	-56.9458				47.45	-64.1785	-56.9458
47.5	-63.9954	-56.7932								47.5	-63.9954	-56.7932				47.5	-63.9954	-56.7932
47.55	-64.1479	-56.8542								47.55	-64.1479	-56.8542				47.55	-64.1479	-56.8542
47.6	-64.0869	-57.1289								47.6	-64.0869	-57.1289				47.6	-64.0869	-57.1289
47.65	-63.9343	-56.9458								47.65	-63.9343	-56.9458				47.65	-63.9343	-56.9458
47.7	-64.2395	-56.8542								47.7	-64.2395	-56.8542				47.7	-64.2395	-56.8542
47.75	-63.9954	-56.8237								47.75	-63.9954	-56.8237				47.75	-63.9954	-56.8237
47.8	-63.9648	-57.0679								47.8	-63.9648	-57.0679				47.8	-63.9648	-57.0679
47.85	-64.1174	-56.9153								47.85	-64.1174	-56.9153				47.85	-64.1174	-56.9153
47.9	-63.9038	-56.9458								47.9	-63.9038	-56.9458				47.9	-63.9038	-56.9458
47.95	-64.1785	-56.7932								47.95	-64.1785	-56.7932				47.95	-64.1785	-56.7932
48	-64.0259	-57.0374								48	-64.0259	-57.0374				48	-64.0259	-57.0374
48.05	-63.8428	-57.0374								48.05	-63.8428	-57.0374				48.05	-63.8428	-57.0374
48.1	-64.1785	-56.9153								48.1	-64.1785	-56.9153				48.1	-64.1785	-56.9153
48.15	-64.0564	-56.9458								48.15	-64.0564	-56.9458				48.15	-64.0564	-56.9458
48.2	-63.9038	-56.7627								48.2	-63.9038	-56.7627				48.2	-63.9038	-56.7627
48.25	-64.0564	-57.1594								48.25	-64.0564	-57.1594				48.25	-64.0564	-57.1594
48.3	-64.1479	-56.9458								48.3	-64.1479	-56.9458				48.3	-64.1479	-56.9458
48.35	-64.0564	-56.9763								48.35	-64.0564	-56.9763				48.35	-64.0564	-56.9763
48.4	-64.0869	-56.8848								48.4	-64.0869	-56.8848				48.4	-64.0869	-56.8848
48.45	-64.1174	-56.9153								48.45	-64.1174	-56.9153				48.45	-64.1174	-56.9153
48.5	-64.0259	-57.0984								48.5	-64.0259	-57.0984				48.5	-64.0259	-57.0984
48.55	-64.0259	-57.0374								48.55	-64.0259	-57.0374				48.55	-64.0259	-57.0374
48.6	-64.1174	-57.0984								48.6	-64.1174	-57.0984				48.6	-64.1174	-57.0984
48.65	-64.0564	-56.8542								48.65	-64.0564	-56.8542				48.65	-64.0564	-56.8542
48.7	-63.8428	-56.9763								48.7	-63.8428	-56.9763				48.7	-63.8428	-56.9763
48.75	-64.209	-57.1899								48.75	-64.209	-57.1899				48.75	-64.209	-57.1899
48.8	-64.0259	-57.1289								48.8	-64.0259	-57.1289				48.8	-64.0259	-57.1289
48.85	-63.8428	-57.0984								48.85	-63.8428	-57.0984				48.85	-63.8428	-57.0984
48.9	-64.0869	-56.9763								48.9	-64.0869	-56.9763				48.9	-64.0869	-56.9763
48.95	-64.0564	-57.0374								48.95	-64.0564	-57.0374				48.95	-64.0564	-57.0374
49	-64.0564	-57.251								49	-64.0564	-57.251				49	-64.0564	-57.251
49.05	-63.9038	-57.1899								49.05	-63.9038	-57.1899				49.05	-63.9038	-57.1899
49.1	-64.0869	-57.0984								49.1	-64.0869	-57.0984				49.1	-64.0869	-57.0984
49.15	-64.0564	-57.0374								49.15	-64.0564	-57.0374				49.15	-64.0564	-57.0374
49.2	-63.8428	-56.9458								49.2	-63.8428	-56.9458				49.2	-63.8428	-56.9458
49.25	-64.1174	-57.1899								49.25	-64.1174	-57.1899				49.25	-64.1174	-57.1899
49.3	-64.0564	-57.251								49.3	-64.0564	-57.251				49.3	-64.0564	-57.251
49.35	-64.1174	-57.1594								49.35	-64.1174	-57.1594				49.35	-64.1174	-57.1594
49.4	-63.9648	-57.0984								49.4	-63.9648	-57.0984				49.4	-63.9648	-57.0984
49.45	-64.209	-56.8848								49.45	-64.209	-56.8848				49.45	-64.209	-56.8848
49.5	-64.1174	-57.0679								49.5	-64.1174	-57.0679				49.5	-64.1174	-57.0679
49.55	-63.9343	-57.1899								49.55	-63.9343	-57.1899				49.55	-63.9343	-57.1899
49.6	-64.1479	-57.0984								49.6	-64.1479	-57.0984				49.6	-64.1479	-57.0984
49.65	-64.1785	-57.1899								49.65	-64.1785	-57.1899				49.65	-64.1785	-57.1899
49.7	-64.1174	-57.0984								49.7	-64.1174	-57.0984				49.7	-64.1174	-57.0984
49.75	-63.9648	-56.9153								49.75	-63.9648	-56.9153				49.75	-63.9648	-56.9153
49.8	-64.2395	-57.0679								49.8	-64.2395	-57.0679				49.8	-64.2395	-57.0679
49.85	-64.1174	-57.2815								49.85	-64.1174	-57.2815				49.85	-64.1174	-57.2815
49.9	-64.0259	-57.1899								49.9	-64.0259	-57.1899				49.9	-64.0259	-57.1899
49.95	-63.9038	-57.1594								49.95	-63.9038	-57.1594				49.95	-63.9038	-57.1594
50	-64.1785	-57.1899								50	-64.1785	-57.1899				50	-64.1785	-57.1899
50.05	-64.1479	-57.0679								50.05	-64.1479	-57.0679				50.05	-64.1479	-57.0679
50.1	-63.9954	-57.0984								50.1	-63.9954	-57.0984				50.1	-63.9954	-57.0984
50.15	-63.9038	-57.251								50.15	-63.9038	-57.251				50.15	-63.9038	-57.251
50.2	-64.1785	-57.2815								50.2	-64.1785	-57.2815				50.2	-64.1785	-57.2815
50.25	-64.0259	-57.251								50.25	-64.0259	-57.251				50.25	-64.0259	-57.251
50.3	-63.9648	-57.1899								50.3	-63.9648	-57.1899				50.3	-63.9648	-57.1899
50.35	-63.9343	-57.0679								50.35	-63.9343	-57.0679				50.35	-63.9343	-57.0679
50.4	-64.1785	-56.8848								50.4	-64.1785	-56.8848				50.4	-64.1785	-56.8848
50.45	-63.9954	-57.0984								50.45	-63.9954	-57.0984				50.45	-63.9954	-57.0984
50.5	-63.8733	-57.2205								50.5	-63.8733	-57.2205				50.5	-63.8733	-57.2205
50.55	-63.9038	-57.1899								50.55	-63.9038	-57.1899				50.55	-63.9038	-57.1899
50.6	-64.1785	-57.0984								50.6	-64.1785	-57.0984				50.6	-64.1785	-57.0984
50.65	-63.9954	-57.0984								50.65	-63.9954	-57.0984				50.65	-63.9954	-57.0984
50.7	-63.9038	-57.0679								50.7	-63.9038	-57.0679				50.7	-63.9038	-57.0679
50.75	-63.8123	-57.0068								50.75	-63.8123	-57.0068				50.75	-63.8123	-57.0068
50.8	-64.1785	-57.0068								50.8	-64.1785	-57.0068				50.8	-64.1785	-57.0068
50.85	-64.0869	-57.1594								50.85	-64.0869	-57.1594				50.85	-64.0869	-57.1594
50.9	-63.9343	-57.312								50.9	-63.9343	-57.312				50.9	-63.9343	-57.312
50.95	-63.6902	-57.1594								50.95	-63.6902	-57.1594				50.95	-63.6902	-57.1594
51	-63.9954	-57.0984								51	-63.9954	-57.0984				51	-63.9954	-57.0984
51.05	-63.9954	-57.0984								51.05	-63.9954	-57.0984				51.05	-63.9954	-57.0984
51.1	-63.9343	-57.0984								51.1	-63.9343	-57.0984				51.1	-63.9343	-57.0984
51.15	-63.6597	-57.0374								51.15	-63.6597	-57.0374				51.15	-63.6597	-57.0374
51.2	-63.8123	-57.0679								51.2	-63.8123	-57.0679				51.2	-63.8123	-57.0679
51.25	-64.0564	-57.1899								51.25	-64.0564	-57.1899				51.25	-64.0564	-57.1899
51.3	-63.9343	-57.312								51.3	-63.9343	-57.312				51.3	-63.9343	-57.312
51.35	-63.8428	-57.2205								51.35	-63.8428	-57.2205				51.35	-63.8428	-57.2205
51.4	-63.6597	-57.1594								51.4	-63.6597	-57.1594				51.4	-63.6597	-57.1594
51.45	-64.0869	-57.0374								51.45	-64.0869	-57.0374				51.45	-64.0869	-57.0374
51.5	-63.9343	-57.0984								51.5	-63.9343	-57.0984				51.5	-63.9343	-57.0984
51.55	-63.8733	-57.2815								51.55	-63.8733	-57.2815				51.55	-63.8733	-57.2815
51.6	-63.8123	-57.2205								51.6	-63.8123	-57.2205				51.6	-63.8123	-57.2205
51.65	-63.8123	-57.0679								51.65	-63.8123	-57.0679				51.65	-63.8123	-57.0679
51.7	-64.0564	-57.0374								51.7	-64.0564	-57.0374				51.7	-64.0564	-57.0374
51.75	-63.9954	-57.3425								51.75	-63.9954	-57.3425				51.75	-63.9954	-57.3425
51.8	-63.9648	-57.2205								51.8	-63.9648	-57.2205				51.8	-63.9648	-57.2205
51.85	-63.6902	-57.0068								51.85	-63.6902	-57.0068				51.85	-63.6902	-57.0068
51.9	-63.8123	-57.1899								51.9	-63.8123	-57.1899				51.9	-63.8123	-57.1899
51.95	-64.0259	-57.251								51.95	-64.0259	-57.251				51.95	-64.0259	-57.251
52	-63.8733	-57.0984								52	-63.8733	-57.0984				52	-63.8733	-57.0984
52.05	-63.9038	-57.2205								52.05	-63.9038	-57.2205				52.05	-63.9038	-57.2205
52.1	-63.6597	-57.1899								52.1	-63.6597	-57.1899				52.1	-63.6597	-57.1899
52.15	-63.8428	-57.4341								52.15	-63.8428	-57.4341				52.15	-63.8428	-57.4341
52.2	-63.9343	-57.2815								52.2	-63.9343	-57.2815				52.2	-63.9343	-57.2815
52.25	-63.8123	-57.0068								52.25	-63.8123	-57.0068				52.25	-63.8123	-57.0068
52.3	-63.8123	-57.4036								52.3	-63.8123	-57.4036				52.3	-63.8123	-57.4036
52.35	-63.6902	-57.1899								52.35	-63.6902	-57.1899				52.35	-63.6902	-57.1899
52.4	-63.6291	-57.4341								52.4	-63.6291	-57.4341				52.4	-63.6291	-57.4341
52.45	-63.8733	-57.251								52.45	-63.8733	-57.251				52.45	-63.8733	-57.251
52.5	-63.8733	-57.0068								52.5	-63.8733	-57.0068				52.5	-63.8733	-57.0068
52.55	-63.7817	-57.373								52.55	-63.7817	-57.373				52.55	-63.7817	-57.373
52.6	-63.7817	-57.1899								52.6	-63.7817	-57.1899				52.6	-63.7817	-57.1899
52.65	-63.5681	-57.312								52.65	-63.5681	-57.312				52.65	-63.5681	-57.312
52.7	-63.7817	-57.2815								52.7	-63.7817	-57.2815				52.7	-63.7817	-57.2815
52.75	-63.9648	-57.0068								52.75	-63.9648	-57.0068				52.75	-63.9648	-57.0068
52.8	-63.7817	-57.3425								52.8	-63.7817	-57.3425				52.8	-63.7817	-57.3425
52.85	-63.7817	-57.251								52.85	-63.7817	-57.251				52.85	-63.7817	-57.251
52.9	-63.6902	-57.0374								52.9	-63.6902	-57.0374				52.9	-63.6902	-57.0374
52.95	-63.5376	-57.312								52.95	-63.5376	-57.312				52.95	-63.5376	-57.312
53	-63.6902	-57.2815								53	-63.6902	-57.2815				53	-63.6902	-57.2815
53.05	-63.8428	-57.1899								53.05	-63.8428	-57.1899				53.05	-63.8428	-57.1899
53.1	-63.7512	-57.4036								53.1	-63.7512	-57.4036				53.1	-63.7512	-57.4036
53.15	-63.7512	-57.312								53.15	-63.7512	-57.312				53.15	-63.7512	-57.312
53.2	-63.6291	-57.4036								53.2	-63.6291	-57.4036				53.2	-63.6291	-57.4036
53.25	-63.2935	-57.4646								53.25	-63.2935	-57.4646				53.25	-63.2935	-57.4646
53.3	-63.5986	-57.373								53.3	-63.5986	-57.373				53.3	-63.5986	-57.373
53.35	-63.7512	-57.2815								53.35	-63.7512	-57.2815				53.35	-63.7512	-57.2815
53.4	-63.7512	-57.4951								53.4	-63.7512	-57.4951				53.4	-63.7512	-57.4951
53.45	-63.6597	-57.4036								53.45	-63.6597	-57.4036				53.45	-63.6597	-57.4036
53.5	-63.5681	-57.1899								53.5	-63.5681	-57.1899				53.5	-63.5681	-57.1899
53.55	-63.5681	-57.4951								53.55	-63.5681	-57.4951				53.55	-63.5681	-57.4951
53.6	-63.385	-57.4341								53.6	-63.385	-57.4341				53.6	-63.385	-57.4341
53.65	-63.5986	-57.2205								53.65	-63.5986	-57.2205				53.65	-63.5986	-57.2205
53.7	-63.6291	-57.4646								53.7	-63.6291	-57.4646				53.7	-63.6291	-57.4646
53.75	-63.6902	-57.312								53.75	-63.6902	-57.312				53.75	-63.6902	-57.312
53.8	-63.5986	-57.251								53.8	-63.5986	-57.251				53.8	-63.5986	-57.251
53.85	-63.5681	-57.373								53.85	-63.5681	-57.373				53.85	-63.5681	-57.373
53.9	-63.4766	-57.4341								53.9	-63.4766	-57.4341				53.9	-63.4766	-57.4341
53.95	-63.4155	-57.312								53.95	-63.4155	-57.312				53.95	-63.4155	-57.312
54	-63.5681	-57.2205								54	-63.5681	-57.2205				54	-63.5681	-57.2205
54.05	-63.6597	-57.5867								54.05	-63.6597	-57.5867				54.05	-63.6597	-57.5867
54.1	-63.6902	-57.3425								54.1	-63.6902	-57.3425				54.1	-63.6902	-57.3425
54.15	-63.5986	-57.2205								54.15	-63.5986	-57.2205				54.15	-63.5986	-57.2205
54.2	-63.6902	-57.4646								54.2	-63.6902	-57.4646				54.2	-63.6902	-57.4646
54.25	-63.5376	-57.4951								54.25	-63.5376	-57.4951				54.25	-63.5376	-57.4951
54.3	-63.324	-57.4036								54.3	-63.324	-57.4036				54.3	-63.324	-57.4036
54.35	-63.5071	-57.251								54.35	-63.5071	-57.251				54.35	-63.5071	-57.251
54.4	-63.5986	-57.5561								54.4	-63.5986	-57.5561				54.4	-63.5986	-57.5561
54.45	-63.8123	-57.4951								54.45	-63.8123	-57.4951				54.45	-63.8123	-57.4951
54.5	-63.5986	-57.312								54.5	-63.5986	-57.312				54.5	-63.5986	-57.312
54.55	-63.5681	-57.4036								54.55	-63.5681	-57.4036				54.55	-63.5681	-57.4036
54.6	-63.5071	-57.5256								54.6	-63.5071	-57.5256				54.6	-63.5071	-57.5256
54.65	-63.4155	-57.4951								54.65	-63.4155	-57.4951				54.65	-63.4155	-57.4951
54.7	-63.5681	-57.3425								54.7	-63.5681	-57.3425				54.7	-63.5681	-57.3425
54.75	-63.6291	-57.4951								54.75	-63.6291	-57.4951				54.75	-63.6291	-57.4951
54.8	-63.7817	-57.373								54.8	-63.7817	-57.373				54.8	-63.7817	-57.373
54.85	-63.5376	-57.4036								54.85	-63.5376	-57.4036				54.85	-63.5376	-57.4036
54.9	-63.6291	-57.2815								54.9	-63.6291	-57.2815				54.9	-63.6291	-57.2815
54.95	-63.7817	-57.6782								54.95	-63.7817	-57.6782				54.95	-63.7817	-57.6782
55	-63.6902	-57.4646								55	-63.6902	-57.4646				55	-63.6902	-57.4646
55.05	-63.4766	-57.373								55.05	-63.4766	-57.373				55.05	-63.4766	-57.373
55.1	-63.7207	-57.3425								55.1	-63.7207	-57.3425				55.1	-63.7207	-57.3425
55.15	-63.5681	-57.6477								55.15	-63.5681	-57.6477				55.15	-63.5681	-57.6477
55.2	-63.5681	-57.5256								55.2	-63.5681	-57.5256				55.2	-63.5681	-57.5256
55.25	-63.6902	-57.373								55.25	-63.6902	-57.373				55.25	-63.6902	-57.373
55.3	-63.5376	-57.4951								55.3	-63.5376	-57.4951				55.3	-63.5376	-57.4951
55.35	-63.6902	-57.6782								55.35	-63.6902	-57.6782				55.35	-63.6902	-57.6782
55.4	-63.6597	-57.5867								55.4	-63.6597	-57.5867				55.4	-63.6597	-57.5867
55.45	-63.385	-57.4646								55.45	-63.385	-57.4646				55.45	-63.385	-57.4646
55.5	-63.6902	-57.4646								55.5	-63.6902	-57.4646				55.5	-63.6902	-57.4646
55.55	-63.5071	-57.7087								55.55	-63.5071	-57.7087				55.55	-63.5071	-57.7087
55.6	-63.6902	-57.5867								55.6	-63.6902	-57.5867				55.6	-63.6902	-57.5867
55.65	-63.7207	-57.5867								55.65	-63.7207	-57.5867				55.65	-63.7207	-57.5867
55.7	-63.5071	-57.4646								55.7	-63.5071	-57.4646				55.7	-63.5071	-57.4646
55.75	-63.6902	-57.7698								55.75	-63.6902	-57.7698				55.75	-63.6902	-57.7698
55.8	-63.5376	-57.5561								55.8	-63.5376	-57.5561				55.8	-63.5376	-57.5561
55.85	-63.8123	-57.5256								55.85	-63.8123	-57.5256				55.85	-63.8123	-57.5256
55.9	-63.6902	-57.373								55.9	-63.6902	-57.373				55.9	-63.6902	-57.373
55.95	-63.5071	-57.6477								55.95	-63.5071	-57.6477				55.95	-63.5071	-57.6477
56	-63.6902	-57.6477								56	-63.6902	-57.6477				56	-63.6902	-57.6477
56.05	-63.6291	-57.5256								56.05	-63.6291	-57.5256				56.05	-63.6291	-57.5256
56.1	-63.6597	-57.4036								56.1	-63.6597	-57.4036				56.1	-63.6597	-57.4036
56.15	-63.6291	-57.5256								56.15	-63.6291	-57.5256				56.15	-63.6291	-57.5256
56.2	-63.5071	-57.7393								56.2	-63.5071	-57.7393				56.2	-63.5071	-57.7393
56.25	-63.7207	-57.5867								56.25	-63.7207	-57.5867				56.25	-63.7207	-57.5867
56.3	-63.7817	-57.4951								56.3	-63.7817	-57.4951				56.3	-63.7817	-57.4951
56.35	-63.4766	-57.4341								56.35	-63.4766	-57.4341				56.35	-63.4766	-57.4341
56.4	-63.7817	-57.6172								56.4	-63.7817	-57.6172				56.4	-63.7817	-57.6172
56.45	-63.7207	-57.6172								56.45	-63.7207	-57.6172				56.45	-63.7207	-57.6172
56.5	-63.324	-57.6782								56.5	-63.324	-57.6782				56.5	-63.324	-57.6782
56.55	-63.7512	-57.5256								56.55	-63.7512	-57.5256				56.55	-63.7512	-57.5256
56.6	-63.5071	-57.4036								56.6	-63.5071	-57.4036				56.6	-63.5071	-57.4036
56.65	-63.385	-57.6172								56.65	-63.385	-57.6172				56.65	-63.385	-57.6172
56.7	-63.7207	-57.5256								56.7	-63.7207	-57.5256				56.7	-63.7207	-57.5256
56.75	-63.5986	-57.5867								56.75	-63.5986	-57.5867				56.75	-63.5986	-57.5867
56.8	-63.385	-57.312								56.8	-63.385	-57.312				56.8	-63.385	-57.312
56.85	-63.6291	-57.373								56.85	-63.6291	-57.373				56.85	-63.6291	-57.373
56.9	-63.6597	-57.6477								56.9	-63.6597	-57.6477				56.9	-63.6597	-57.6477
56.95	-63.5376	-57.5561								56.95	-63.5376	-57.5561				56.95	-63.5376	-57.5561
57	-63.5376	-57.4646								57	-63.5376	-57.4646				57	-63.5376	-57.4646
57.05	-63.5986	-57.2815								57.05	-63.5986	-57.2815				57.05	-63.5986	-57.2815
57.1	-63.6597	-57.312								57.1	-63.6597	-57.312				57.1	-63.6597	-57.312
57.15	-63.5071	-57.4951								57.15	-63.5071	-57.4951				57.15	-63.5071	-57.4951
57.2	-63.7512	-57.373								57.2	-63.7512	-57.373				57.2	-63.7512	-57.373
57.25	-63.5681	-57.4036								57.25	-63.5681	-57.4036				57.25	-63.5681	-57.4036
57.3	-63.446	-57.251								57.3	-63.446	-57.251				57.3	-63.446	-57.251
57.35	-63.7817	-57.1594								57.35	-63.7817	-57.1594				57.35	-63.7817	-57.1594
57.4	-63.6291	-57.4036								57.4	-63.6291	-57.4036				57.4	-63.6291	-57.4036
57.45	-63.446	-57.4646								57.45	-63.446	-57.4646				57.45	-63.446	-57.4646
57.5	-63.5681	-57.312								57.5	-63.5681	-57.312				57.5	-63.5681	-57.312
57.55	-63.6597	-57.2205								57.55	-63.6597	-57.2205				57.55	-63.6597	-57.2205
57.6	-63.5681	-57.2205								57.6	-63.5681	-57.2205				57.6	-63.5681	-57.2205
57.65	-63.324	-57.373								57.65	-63.324	-57.373				57.65	-63.324	-57.373
57.7	-63.6291	-57.4341								57.7	-63.6291	-57.4341				57.7	-63.6291	-57.4341
57.75	-63.5376	-57.4036								57.75	-63.5376	-57.4036				57.75	-63.5376	-57.4036
57.8	-63.5376	-57.4341								57.8	-63.5376	-57.4341				57.8	-63.5376	-57.4341
57.85	-63.385	-57.373								57.85	-63.385	-57.373				57.85	-63.385	-57.373
57.9	-63.5986	-57.0984								57.9	-63.5986	-57.0984				57.9	-63.5986	-57.0984
57.95	-63.5681	-57.373								57.95	-63.5681	-57.373				57.95	-63.5681	-57.373
58	-63.324	-57.4951								58	-63.324	-57.4951				58	-63.324	-57.4951
58.05	-63.6291	-57.3425								58.05	-63.6291	-57.3425				58.05	-63.6291	-57.3425
58.1	-63.5376	-57.4341								58.1	-63.5376	-57.4341				58.1	-63.5376	-57.4341
58.15	-63.6902	-57.251								58.15	-63.6902	-57.251				58.15	-63.6902	-57.251
58.2	-63.4155	-57.0679								58.2	-63.4155	-57.0679				58.2	-63.4155	-57.0679
58.25	-63.7207	-57.1899								58.25	-63.7207	-57.1899				58.25	-63.7207	-57.1899
58.3	-63.6291	-57.4036								58.3	-63.6291	-57.4036				58.3	-63.6291	-57.4036
58.35	-63.5681	-57.3425								58.35	-63.5681	-57.3425				58.35	-63.5681	-57.3425
58.4	-63.6291	-57.251								58.4	-63.6291	-57.251				58.4	-63.6291	-57.251
58.45	-63.6902	-57.2815								58.45	-63.6902	-57.2815				58.45	-63.6902	-57.2815
58.5	-63.5681	-57.1899								58.5	-63.5681	-57.1899				58.5	-63.5681	-57.1899
58.55	-63.5071	-57.0679								58.55	-63.5071	-57.0679				58.55	-63.5071	-57.0679
58.6	-63.5986	-57.251								58.6	-63.5986	-57.251				58.6	-63.5986	-57.251
58.65	-63.7207	-57.3425								58.65	-63.7207	-57.3425				58.65	-63.7207	-57.3425
58.7	-63.6597	-57.4036								58.7	-63.6597	-57.4036				58.7	-63.6597	-57.4036
58.75	-63.4155	-57.2815								58.75	-63.4155	-57.2815				58.75	-63.4155	-57.2815
58.8	-63.446	-57.2815								58.8	-63.446	-57.2815				58.8	-63.446	-57.2815
58.85	-63.7512	-57.1899								58.85	-63.7512	-57.1899				58.85	-63.7512	-57.1899
58.9	-63.5376	-57.1899								58.9	-63.5376	-57.1899				58.9	-63.5376	-57.1899
58.95	-63.4766	-57.251								58.95	-63.4766	-57.251				58.95	-63.4766	-57.251
59	-63.5071	-57.4341								59	-63.5071	-57.4341				59	-63.5071	-57.4341
59.05	-63.6291	-57.4646								59.05	-63.6291	-57.4646				59.05	-63.6291	-57.4646
59.1	-63.5376	-57.3425								59.1	-63.5376	-57.3425				59.1	-63.5376	-57.3425
59.15	-63.5071	-57.373								59.15	-63.5071	-57.373				59.15	-63.5071	-57.373
59.2	-63.4766	-57.3425								59.2	-63.4766	-57.3425				59.2	-63.4766	-57.3425
59.25	-63.6902	-57.0984								59.25	-63.6902	-57.0984				59.25	-63.6902	-57.0984
59.3	-63.5986	-57.1289								59.3	-63.5986	-57.1289				59.3	-63.5986	-57.1289
59.35	-63.4766	-57.2815								59.35	-63.4766	-57.2815				59.35	-63.4766	-57.2815
59.4	-63.4155	-57.4341								59.4	-63.4155	-57.4341				59.4	-63.4155	-57.4341
59.45	-63.8123	-57.4341								59.45	-63.8123	-57.4341				59.45	-63.8123	-57.4341
59.5	-63.5986	-57.312								59.5	-63.5986	-57.312				59.5	-63.5986	-57.312
59.55	-63.5986	-57.3425								59.55	-63.5986	-57.3425				59.55	-63.5986	-57.3425
59.6	-63.446	-57.312								59.6	-63.446	-57.312				59.6	-63.446	-57.312
59.65	-63.5986	-57.0374								59.65	-63.5986	-57.0374				59.65	-63.5986	-57.0374
59.7	-63.6597	-57.2815								59.7	-63.6597	-57.2815				59.7	-63.6597	-57.2815
59.75	-63.6597	-57.4036								59.75	-63.6597	-57.4036				59.75	-63.6597	-57.4036
59.8	-63.5071	-57.3425								59.8	-63.5071	-57.3425				59.8	-63.5071	-57.3425
59.85	-63.4766	-57.1899								59.85	-63.4766	-57.1899				59.85	-63.4766	-57.1899
59.9	-63.6597	-57.2815								59.9	-63.6597	-57.2815				59.9	-63.6597	-57.2815
59.95	-63.6597	-57.5256								59.95	-63.6597	-57.5256				59.95	-63.6597	-57.5256
60	-63.5986	-57.373								60	-63.5986	-57.373				60	-63.5986	-57.373
60.05	-63.4766	-57.2205								60.05	-63.4766	-57.2205				60.05	-63.4766	-57.2205
60.1	-63.5071	-57.373								60.1	-63.5071	-57.373				60.1	-63.5071	-57.373
60.15	-63.6902	-57.5256								60.15	-63.6902	-57.5256				60.15	-63.6902	-57.5256
60.2	-63.5681	-57.312								60.2	-63.5681	-57.312				60.2	-63.5681	-57.312
60.25	-63.6291	-57.2815								60.25	-63.6291	-57.2815				60.25	-63.6291	-57.2815
60.3	-63.4155	-57.4341								60.3	-63.4155	-57.4341				60.3	-63.4155	-57.4341
60.35	-63.4766	-57.373								60.35	-63.4766	-57.373				60.35	-63.4766	-57.373
60.4	-63.6902	-57.4646								60.4	-63.6902	-57.4646				60.4	-63.6902	-57.4646
60.45	-63.6902	-57.4036								60.45	-63.6902	-57.4036				60.45	-63.6902	-57.4036
60.5	-63.6291	-57.2815								60.5	-63.6291	-57.2815				60.5	-63.6291	-57.2815
60.55	-63.446	-57.4646								60.55	-63.446	-57.4646				60.55	-63.446	-57.4646
60.6	-63.5986	-57.3425								60.6	-63.5986	-57.3425				60.6	-63.5986	-57.3425
60.65	-63.7512	-57.4036								60.65	-63.7512	-57.4036				60.65	-63.7512	-57.4036
60.7	-63.7512	-57.4036								60.7	-63.7512	-57.4036				60.7	-63.7512	-57.4036
60.75	-63.6291	-57.1289								60.75	-63.6291	-57.1289				60.75	-63.6291	-57.1289
60.8	-63.5681	-57.5256								60.8	-63.5681	-57.5256				60.8	-63.5681	-57.5256
60.85	-63.5376	-57.312								60.85	-63.5376	-57.312				60.85	-63.5376	-57.312
60.9	-63.8123	-57.4341								60.9	-63.8123	-57.4341				60.9	-63.8123	-57.4341
60.95	-63.7512	-57.4951								60.95	-63.7512	-57.4951				60.95	-63.7512	-57.4951
61	-63.6597	-57.1594								61	-63.6597	-57.1594				61	-63.6597	-57.1594
61.05	-63.6902	-57.5256								61.05	-63.6902	-57.5256				61.05	-63.6902	-57.5256
61.1	-63.4155	-57.373								61.1	-63.4155	-57.373				61.1	-63.4155	-57.373
61.15	-63.5986	-57.3425								61.15	-63.5986	-57.3425				61.15	-63.5986	-57.3425
61.2	-63.7512	-57.4646								61.2	-63.7512	-57.4646				61.2	-63.7512	-57.4646
61.25	-63.6291	-57.2815								61.25	-63.6291	-57.2815				61.25	-63.6291	-57.2815
61.3	-63.7512	-57.4341								61.3	-63.7512	-57.4341				61.3	-63.7512	-57.4341
61.35	-63.5071	-57.4646								61.35	-63.5071	-57.4646				61.35	-63.5071	-57.4646
61.4	-63.324	-57.312								61.4	-63.324	-57.312				61.4	-63.324	-57.312
61.45	-63.6597	-57.4951								61.45	-63.6597	-57.4951				61.45	-63.6597	-57.4951
61.5	-63.8123	-57.4341								61.5	-63.8123	-57.4341				61.5	-63.8123	-57.4341
61.55	-63.7512	-57.2205								61.55	-63.7512	-57.2205				61.55	-63.7512	-57.2205
61.6	-63.7512	-57.4646								61.6	-63.7512	-57.4646				61.6	-63.7512	-57.4646
61.65	-63.6597	-57.4646								61.65	-63.6597	-57.4646				61.65	-63.6597	-57.4646
61.7	-63.5681	-57.312								61.7	-63.5681	-57.312				61.7	-63.5681	-57.312
61.75	-63.6291	-57.4341								61.75	-63.6291	-57.4341				61.75	-63.6291	-57.4341
61.8	-63.8123	-57.4036								61.8	-63.8123	-57.4036				61.8	-63.8123	-57.4036
61.85	-63.7207	-57.3425								61.85	-63.7207	-57.3425				61.85	-63.7207	-57.3425
61.9	-63.6597	-57.312								61.9	-63.6597	-57.312				61.9	-63.6597	-57.312
61.95	-63.5681	-57.4646								61.95	-63.5681	-57.4646				61.95	-63.5681	-57.4646
62	-63.5681	-57.4646								62	-63.5681	-57.4646				62	-63.5681	-57.4646
62.05	-63.4766	-57.251								62.05	-63.4766	-57.251				62.05	-63.4766	-57.251
62.1	-63.7207	-57.5867								62.1	-63.7207	-57.5867				62.1	-63.7207	-57.5867
62.15	-63.7512	-57.4951								62.15	-63.7512	-57.4951				62.15	-63.7512	-57.4951
62.2	-63.6597	-57.312								62.2	-63.6597	-57.312				62.2	-63.6597	-57.312
62.25	-63.5681	-57.5256								62.25	-63.5681	-57.5256				62.25	-63.5681	-57.5256
62.3	-63.6291	-57.4646								62.3	-63.6291	-57.4646				62.3	-63.6291	-57.4646
62.35	-63.5986	-57.4036								62.35	-63.5986	-57.4036				62.35	-63.5986	-57.4036
62.4	-63.446	-57.4341								62.4	-63.446	-57.4341				62.4	-63.446	-57.4341
62.45	-63.6597	-57.6172								62.45	-63.6597	-57.6172				62.45	-63.6597	-57.6172
62.5	-63.7207	-57.4646								62.5	-63.7207	-57.4646				62.5	-63.7207	-57.4646
62.55	-63.7817	-57.2815								62.55	-63.7817	-57.2815				62.55	-63.7817	-57.2815
62.6	-63.6902	-57.5256								62.6	-63.6902	-57.5256				62.6	-63.6902	-57.5256
62.65	-63.6597	-57.4646								62.65	-63.6597	-57.4646				62.65	-63.6597	-57.4646
62.7	-63.6291	-57.4036								62.7	-63.6291	-57.4036				62.7	-63.6291	-57.4036
62.75	-63.5071	-57.312								62.75	-63.5071	-57.312				62.75	-63.5071	-57.312
62.8	-63.5986	-57.5867								62.8	-63.5986	-57.5867				62.8	-63.5986	-57.5867
62.85	-63.7817	-57.4646								62.85	-63.7817	-57.4646				62.85	-63.7817	-57.4646
62.9	-63.8428	-57.2815								62.9	-63.8428	-57.2815				62.9	-63.8428	-57.2815
62.95	-63.7512	-57.4036								62.95	-63.7512	-57.4036				62.95	-63.7512	-57.4036
63	-63.7207	-57.373								63	-63.7207	-57.373				63	-63.7207	-57.373
63.05	-63.5071	-57.4341								63.05	-63.5071	-57.4341				63.05	-63.5071	-57.4341
63.1	-63.6902	-57.1899								63.1	-63.6902	-57.1899				63.1	-63.6902	-57.1899
63.15	-63.8733	-57.4646								63.15	-63.8733	-57.4646				63.15	-63.8733	-57.4646
63.2	-63.7207	-57.4646								63.2	-63.7207	-57.4646				63.2	-63.7207	-57.4646
63.25	-63.385	-57.4036								63.25	-63.385	-57.4036				63.25	-63.385	-57.4036
63.3	-63.7512	-57.2815								63.3	-63.7512	-57.2815				63.3	-63.7512	-57.2815
63.35	-63.6597	-57.4646								63.35	-63.6597	-57.4646				63.35	-63.6597	-57.4646
63.4	-63.5071	-57.4036								63.4	-63.5071	-57.4036				63.4	-63.5071	-57.4036
63.45	-63.7207	-57.312								63.45	-63.7207	-57.312				63.45	-63.7207	-57.312
63.5	-63.6902	-57.2815								63.5	-63.6902	-57.2815				63.5	-63.6902	-57.2815
63.55	-63.4155	-57.4646								63.55	-63.4155	-57.4646				63.55	-63.4155	-57.4646
63.6	-63.8733	-57.312								63.6	-63.8733	-57.312				63.6	-63.8733	-57.312
63.65	-63.5986	-57.251								63.65	-63.5986	-57.251				63.65	-63.5986	-57.251
63.7	-63.5071	-57.312								63.7	-63.5071	-57.312				63.7	-63.5071	-57.312
63.75	-63.7512	-57.373								63.75	-63.7512	-57.373				63.75	-63.7512	-57.373
63.8	-63.5986	-57.312								63.8	-63.5986	-57.312				63.8	-63.5986	-57.312
63.85	-63.7817	-57.2205								63.85	-63.7817	-57.2205				63.85	-63.7817	-57.2205
63.9	-63.6902	-57.1594								63.9	-63.6902	-57.1594				63.9	-63.6902	-57.1594
63.95	-63.5071	-57.373								63.95	-63.5071	-57.373				63.95	-63.5071	-57.373
64	-63.7512	-57.312								64	-63.7512	-57.312				64	-63.7512	-57.312
64.05	-63.5071	-57.0984								64.05	-63.5071	-57.0984				64.05	-63.5071	-57.0984
64.1	-63.7512	-57.0984								64.1	-63.7512	-57.0984				64.1	-63.7512	-57.0984
64.15	-63.6291	-57.373								64.15	-63.6291	-57.373				64.15	-63.6291	-57.373
64.2	-63.5376	-57.251								64.2	-63.5376	-57.251				64.2	-63.5376	-57.251
64.25	-63.7512	-57.2205								64.25	-63.7512	-57.2205				64.25	-63.7512	-57.2205
64.3	-63.385	-57.0374								64.3	-63.385	-57.0374				64.3	-63.385	-57.0374
64.35	-63.6597	-57.312								64.35	-63.6597	-57.312				64.35	-63.6597	-57.312
64.4	-63.5986	-57.251								64.4	-63.5986	-57.251				64.4	-63.5986	-57.251
64.45	-63.4155	-57.251								64.45	-63.4155	-57.251				64.45	-63.4155	-57.251
64.5	-63.6902	-57.0984								64.5	-63.6902	-57.0984				64.5	-63.6902	-57.0984
64.55	-63.5071	-57.2205								64.55	-63.5071	-57.2205				64.55	-63.5071	-57.2205
64.6	-63.4155	-57.3425								64.6	-63.4155	-57.3425				64.6	-63.4155	-57.3425
64.65	-63.6597	-57.1899								64.65	-63.6597	-57.1899				64.65	-63.6597	-57.1899
64.7	-63.5071	-57.1899								64.7	-63.5071	-57.1899				64.7	-63.5071	-57.1899
64.75	-63.5071	-57.0374								64.75	-63.5071	-57.0374				64.75	-63.5071	-57.0374
64.8	-63.6291	-57.2815								64.8	-63.6291	-57.2815				64.8	-63.6291	-57.2815
64.85	-63.5681	-57.251								64.85	-63.5681	-57.251				64.85	-63.5681	-57.251
64.9	-63.5986	-57.312								64.9	-63.5986	-57.312				64.9	-63.5986	-57.312
64.95	-63.6902	-57.1594								64.95	-63.6902	-57.1594				64.95	-63.6902	-57.1594
65	-63.5376	-57.0679								65	-63.5376	-57.0679				65	-63.5376	-57.0679
65.05	-63.5376	-57.251								65.05	-63.5376	-57.251				65.05	-63.5376	-57.251
65.1	-63.7207	-57.2205								65.1	-63.7207	-57.2205				65.1	-63.7207	-57.2205
65.15	-63.5071	-57.2815								65.15	-63.5071	-57.2815				65.15	-63.5071	-57.2815
65.2	-63.385	-57.1289								65.2	-63.385	-57.1289				65.2	-63.385	-57.1289
65.25	-63.6902	-57.0679								65.25	-63.6902	-57.0679				65.25	-63.6902	-57.0679
65.3	-63.6291	-57.251								65.3	-63.6291	-57.251				65.3	-63.6291	-57.251
65.35	-63.3545	-57.312								65.35	-63.3545	-57.312				65.35	-63.3545	-57.312
65.4	-63.5986	-57.2205								65.4	-63.5986	-57.2205				65.4	-63.5986	-57.2205
65.45	-63.5986	-57.0679								65.45	-63.5986	-57.0679				65.45	-63.5986	-57.0679
65.5	-63.4155	-57.0984								65.5	-63.4155	-57.0984				65.5	-63.4155	-57.0984
65.55	-63.5986	-57.312								65.55	-63.5986	-57.312				65.55	-63.5986	-57.312
65.6	-63.5681	-57.3425								65.6	-63.5681	-57.3425				65.6	-63.5681	-57.3425
65.65	-63.446	-57.2205								65.65	-63.446	-57.2205				65.65	-63.446	-57.2205
65.7	-63.5071	-57.1594								65.7	-63.5071	-57.1594				65.7	-63.5071	-57.1594
65.75	-63.6291	-57.0679								65.75	-63.6291	-57.0679				65.75	-63.6291	-57.0679
65.8	-63.5986	-57.251								65.8	-63.5986	-57.251				65.8	-63.5986	-57.251
65.85	-63.385	-57.2815								65.85	-63.385	-57.2815				65.85	-63.385	-57.2815
65.9	-63.7512	-57.2205								65.9	-63.7512	-57.2205				65.9	-63.7512	-57.2205
65.95	-63.6902	-57.2205								65.95	-63.6902	-57.2205				65.95	-63.6902	-57.2205
66	-63.5071	-57.0374								66	-63.5071	-57.0374				66	-63.5071	-57.0374
66.05	-63.4766	-57.0984								66.05	-63.4766	-57.0984				66.05	-63.4766	-57.0984
66.1	-63.7512	-57.2815								66.1	-63.7512	-57.2815				66.1	-63.7512	-57.2815
66.15	-63.6597	-57.251								66.15	-63.6597	-57.251				66.15	-63.6597	-57.251
66.2	-63.324	-57.2205								66.2	-63.324	-57.2205				66.2	-63.324	-57.2205
66.25	-63.7512	-57.1594								66.25	-63.7512	-57.1594				66.25	-63.7512	-57.1594
66.3	-63.7207	-56.9458								66.3	-63.7207	-56.9458				66.3	-63.7207	-56.9458
66.35	-63.5986	-57.0374								66.35	-63.5986	-57.0374				66.35	-63.5986	-57.0374
66.4	-63.4766	-57.373								66.4	-63.4766	-57.373				66.4	-63.4766	-57.373
66.45	-63.7512	-57.1594								66.45	-63.7512	-57.1594				66.45	-63.7512	-57.1594
66.5	-63.6902	-57.2815								66.5	-63.6902	-57.2815				66.5	-63.6902	-57.2815
66.55	-63.446	-57.1289								66.55	-63.446	-57.1289				66.55	-63.446	-57.1289
66.6	-63.6291	-57.0679								66.6	-63.6291	-57.0679				66.6	-63.6291	-57.0679
66.65	-63.6597	-57.0984								66.65	-63.6597	-57.0984				66.65	-63.6597	-57.0984
66.7	-63.6597	-57.2815								66.7	-63.6597	-57.2815				66.7	-63.6597	-57.2815
66.75	-63.385	-57.312								66.75	-63.385	-57.312				66.75	-63.385	-57.312
66.8	-63.7512	-57.2205								66.8	-63.7512	-57.2205				66.8	-63.7512	-57.2205
66.85	-63.6902	-57.2815								66.85	-63.6902	-57.2815				66.85	-63.6902	-57.2815
66.9	-63.5986	-57.1594								66.9	-63.5986	-57.1594				66.9	-63.5986	-57.1594
66.95	-63.5681	-57.0984								66.95	-63.5681	-57.0984				66.95	-63.5681	-57.0984
67	-63.7817	-57.1594								67	-63.7817	-57.1594				67	-63.7817	-57.1594
67.05	-63.7817	-57.312								67.05	-63.7817	-57.312				67.05	-63.7817	-57.312
67.1	-63.6291	-57.3425								67.1	-63.6291	-57.3425				67.1	-63.6291	-57.3425
67.15	-63.4766	-57.1289								67.15	-63.4766	-57.1289				67.15	-63.4766	-57.1289
67.2	-63.9038	-57.2205								67.2	-63.9038	-57.2205				67.2	-63.9038	-57.2205
67.25	-63.7512	-57.1289								67.25	-63.7512	-57.1289				67.25	-63.7512	-57.1289
67.3	-63.7512	-57.0374								67.3	-63.7512	-57.0374				67.3	-63.7512	-57.0374
67.35	-63.5681	-56.9458								67.35	-63.5681	-56.9458				67.35	-63.5681	-56.9458
67.4	-63.8428	-57.2815								67.4	-63.8428	-57.2815				67.4	-63.8428	-57.2815
67.45	-63.7512	-57.4036								67.45	-63.7512	-57.4036				67.45	-63.7512	-57.4036
67.5	-63.6902	-57.1899								67.5	-63.6902	-57.1899				67.5	-63.6902	-57.1899
67.55	-63.4766	-57.1594								67.55	-63.4766	-57.1594				67.55	-63.4766	-57.1594
67.6	-63.7512	-57.1899								67.6	-63.7512	-57.1899				67.6	-63.7512	-57.1899
67.65	-63.8428	-57.2205								67.65	-63.8428	-57.2205				67.65	-63.8428	-57.2205
67.7	-63.7512	-56.9763								67.7	-63.7512	-56.9763				67.7	-63.7512	-56.9763
67.75	-63.5376	-57.0984								67.75	-63.5376	-57.0984				67.75	-63.5376	-57.0984
67.8	-63.5681	-57.312								67.8	-63.5681	-57.312				67.8	-63.5681	-57.312
67.85	-63.7817	-57.3425								67.85	-63.7817	-57.3425				67.85	-63.7817	-57.3425
67.9	-63.7512	-57.312								67.9	-63.7512	-57.312				67.9	-63.7512	-57.312
67.95	-63.6291	-57.2205								67.95	-63.6291	-57.2205				67.95	-63.6291	-57.2205
68	-63.5376	-57.251								68	-63.5376	-57.251				68	-63.5376	-57.251
68.05	-63.7817	-57.1594								68.05	-63.7817	-57.1594				68.05	-63.7817	-57.1594
68.1	-63.7817	-57.0984								68.1	-63.7817	-57.0984				68.1	-63.7817	-57.0984
68.15	-63.6597	-57.251								68.15	-63.6597	-57.251				68.15	-63.6597	-57.251
68.2	-63.6291	-57.251								68.2	-63.6291	-57.251				68.2	-63.6291	-57.251
68.25	-63.5986	-57.1594								68.25	-63.5986	-57.1594				68.25	-63.5986	-57.1594
68.3	-63.7817	-56.9458								68.3	-63.7817	-56.9458				68.3	-63.7817	-56.9458
68.35	-63.8123	-57.2205								68.35	-63.8123	-57.2205				68.35	-63.8123	-57.2205
68.4	-63.7207	-57.1594								68.4	-63.7207	-57.1594				68.4	-63.7207	-57.1594
68.45	-63.4766	-56.9763								68.45	-63.4766	-56.9763				68.45	-63.4766	-56.9763
68.5	-63.7207	-57.1899								68.5	-63.7207	-57.1899				68.5	-63.7207	-57.1899
68.55	-63.8123	-57.251								68.55	-63.8123	-57.251				68.55	-63.8123	-57.251
68.6	-63.7817	-57.0374								68.6	-63.7817	-57.0374				68.6	-63.7817	-57.0374
68.65	-63.5986	-57.1899								68.65	-63.5986	-57.1899				68.65	-63.5986	-57.1899
68.7	-63.4155	-57.2205								68.7	-63.4155	-57.2205				68.7	-63.4155	-57.2205
68.75	-63.6597	-56.9458								68.75	-63.6597	-56.9458				68.75	-63.6597	-56.9458
68.8	-63.7207	-57.312								68.8	-63.7207	-57.312				68.8	-63.7207	-57.312
68.85	-63.5986	-57.0374								68.85	-63.5986	-57.0374				68.85	-63.5986	-57.0374
68.9	-63.5681	-57.2205								68.9	-63.5681	-57.2205				68.9	-63.5681	-57.2205
68.95	-63.4155	-57.1899								68.95	-63.4155	-57.1899				68.95	-63.4155	-57.1899
69	-63.5071	-56.9153								69	-63.5071	-56.9153				69	-63.5071	-56.9153
69.05	-63.7817	-57.312								69.05	-63.7817	-57.312				69.05	-63.7817	-57.312
69.1	-63.5681	-57.1289								69.1	-63.5681	-57.1289				69.1	-63.5681	-57.1289
69.15	-63.5681	-57.1899								69.15	-63.5681	-57.1899				69.15	-63.5681	-57.1899
69.2	-63.4155	-57.0679								69.2	-63.4155	-57.0679				69.2	-63.4155	-57.0679
69.25	-63.5376	-56.9458								69.25	-63.5376	-56.9458				69.25	-63.5376	-56.9458
69.3	-63.8123	-57.251								69.3	-63.8123	-57.251				69.3	-63.8123	-57.251
69.35	-63.6291	-57.0679								69.35	-63.6291	-57.0679				69.35	-63.6291	-57.0679
69.4	-63.6902	-57.0374								69.4	-63.6902	-57.0374				69.4	-63.6902	-57.0374
69.45	-63.6291	-57.0374								69.45	-63.6291	-57.0374				69.45	-63.6291	-57.0374
69.5	-63.5071	-56.9458								69.5	-63.5071	-56.9458				69.5	-63.5071	-56.9458
69.55	-63.6597	-57.1899								69.55	-63.6597	-57.1899				69.55	-63.6597	-57.1899
69.6	-63.7207	-57.0984								69.6	-63.7207	-57.0984				69.6	-63.7207	-57.0984
69.65	-63.6597	-56.7932								69.65	-63.6597	-56.7932				69.65	-63.6597	-56.7932
69.7	-63.6902	-57.0984								69.7	-63.6902	-57.0984				69.7	-63.6902	-57.0984
69.75	-63.5376	-57.0984								69.75	-63.5376	-57.0984				69.75	-63.5376	-57.0984
69.8	-63.446	-56.8237								69.8	-63.446	-56.8237				69.8	-63.446	-56.8237
69.85	-63.6597	-57.1899								69.85	-63.6597	-57.1899				69.85	-63.6597	-57.1899
69.9	-63.7817	-57.0374								69.9	-63.7817	-57.0374				69.9	-63.7817	-57.0374
69.95	-63.6597	-56.9153								69.95	-63.6597	-56.9153				69.95	-63.6597	-56.9153
70	-63.6291	-57.1594								70	-63.6291	-57.1594				70	-63.6291	-57.1594
70.05	-63.5681	-57.0984								70.05	-63.5681	-57.0984				70.05	-63.5681	-57.0984
70.1	-63.4155	-56.8848								70.1	-63.4155	-56.8848				70.1	-63.4155	-56.8848
70.15	-63.6597	-57.1899								70.15	-63.6597	-57.1899				70.15	-63.6597	-57.1899
70.2	-63.7817	-57.1594								70.2	-63.7817	-57.1594				70.2	-63.7817	-57.1594
70.25	-63.6597	-56.9763								70.25	-63.6597	-56.9763				70.25	-63.6597	-56.9763
70.3	-63.7207	-57.0679								70.3	-63.7207	-57.0679				70.3	-63.7207	-57.0679
70.35	-63.6291	-57.2205								70.35	-63.6291	-57.2205				70.35	-63.6291	-57.2205
70.4	-63.4766	-57.0984								70.4	-63.4766	-57.0984				70.4	-63.4766	-57.0984
70.45	-63.5071	-56.9458								70.45	-63.5071	-56.9458				70.45	-63.5071	-56.9458
70.5	-63.7207	-57.1899								70.5	-63.7207	-57.1899				70.5	-63.7207	-57.1899
70.55	-63.8123	-57.1594								70.55	-63.8123	-57.1594				70.55	-63.8123	-57.1594
70.6	-63.7207	-56.8237								70.6	-63.7207	-56.8237				70.6	-63.7207	-56.8237
70.65	-63.6597	-57.1594								70.65	-63.6597	-57.1594				70.65	-63.6597	-57.1594
70.7	-63.5986	-57.0984								70.7	-63.5986	-57.0984				70.7	-63.5986	-57.0984
70.75	-63.4766	-56.9763								70.75	-63.4766	-56.9763				70.75	-63.4766	-56.9763
70.8	-63.385	-57.0984								70.8	-63.385	-57.0984				70.8	-63.385	-57.0984
70.85	-63.5986	-57.1899								70.85	-63.5986	-57.1899				70.85	-63.5986	-57.1899
70.9	-63.7512	-57.0679								70.9	-63.7512	-57.0679				70.9	-63.7512	-57.0679
70.95	-63.5986	-56.9153								70.95	-63.5986	-56.9153				70.95	-63.5986	-56.9153
71	-63.5986	-57.2815								71	-63.5986	-57.2815				71	-63.5986	-57.2815
71.05	-63.5986	-57.1289								71.05	-63.5986	-57.1289				71.05	-63.5986	-57.1289
71.1	-63.5071	-57.0374								71.1	-63.5071	-57.0374				71.1	-63.5071	-57.0374
71.15	-63.4766	-56.9763								71.15	-63.4766	-56.9763				71.15	-63.4766	-56.9763
71.2	-63.5376	-57.251								71.2	-63.5376	-57.251				71.2	-63.5376	-57.251
71.25	-63.6902	-57.1899								71.25	-63.6902	-57.1899				71.25	-63.6902	-57.1899
71.3	-63.7207	-56.8848								71.3	-63.7207	-56.8848				71.3	-63.7207	-56.8848
71.35	-63.7512	-57.0984								71.35	-63.7512	-57.0984				71.35	-63.7512	-57.0984
71.4	-63.6597	-57.2205								71.4	-63.6597	-57.2205				71.4	-63.6597	-57.2205
71.45	-63.5376	-57.2205								71.45	-63.5376	-57.2205				71.45	-63.5376	-57.2205
71.5	-63.8428	-56.8848								71.5	-63.8428	-56.8848				71.5	-63.8428	-56.8848
71.55	-63.7512	-57.1289								71.55	-63.7512	-57.1289				71.55	-63.7512	-57.1289
71.6	-63.6291	-57.0679								71.6	-63.6291	-57.0679				71.6	-63.6291	-57.0679
71.65	-63.6597	-57.0068								71.65	-63.6597	-57.0068				71.65	-63.6597	-57.0068
71.7	-63.8123	-56.9763								71.7	-63.8123	-56.9763				71.7	-63.8123	-56.9763
71.75	-63.6597	-57.251								71.75	-63.6597	-57.251				71.75	-63.6597	-57.251
71.8	-63.7207	-57.0984								71.8	-63.7207	-57.0984				71.8	-63.7207	-57.0984
71.85	-63.7207	-57.0374								71.85	-63.7207	-57.0374				71.85	-63.7207	-57.0374
71.9	-63.5681	-57.0068								71.9	-63.5681	-57.0068				71.9	-63.5681	-57.0068
71.95	-63.8428	-57.2815								71.95	-63.8428	-57.2815				71.95	-63.8428	-57.2815
72	-63.6902	-57.0984								72	-63.6902	-57.0984				72	-63.6902	-57.0984
72.05	-63.4766	-57.0679								72.05	-63.4766	-57.0679				72.05	-63.4766	-57.0679
72.1	-63.7512	-56.9458								72.1	-63.7512	-56.9458				72.1	-63.7512	-56.9458
72.15	-63.5986	-57.2815								72.15	-63.5986	-57.2815				72.15	-63.5986	-57.2815
72.2	-63.7817	-57.0374								72.2	-63.7817	-57.0374				72.2	-63.7817	-57.0374
72.25	-63.8123	-57.1289								72.25	-63.8123	-57.1289				72.25	-63.8123	-57.1289
72.3	-63.5986	-56.9763								72.3	-63.5986	-56.9763				72.3	-63.5986	-56.9763
72.35	-63.7207	-57.251								72.35	-63.7207	-57.251				72.35	-63.7207	-57.251
72.4	-63.6291	-57.2205								72.4	-63.6291	-57.2205				72.4	-63.6291	-57.2205
72.45	-63.8123	-57.0984								72.45	-63.8123	-57.0984				72.45	-63.8123	-57.0984
72.5	-63.8123	-57.0374								72.5	-63.8123	-57.0374				72.5	-63.8123	-57.0374
72.55	-63.6291	-57.1594								72.55	-63.6291	-57.1594				72.55	-63.6291	-57.1594
72.6	-63.9954	-57.2205								72.6	-63.9954	-57.2205				72.6	-63.9954	-57.2205
72.65	-63.7207	-57.2205								72.65	-63.7207	-57.2205				72.65	-63.7207	-57.2205
72.7	-63.9343	-57.0068								72.7	-63.9343	-57.0068				72.7	-63.9343	-57.0068
72.75	-63.9038	-57.0374								72.75	-63.9038	-57.0374				72.75	-63.9038	-57.0374
72.8	-63.6902	-57.1899								72.8	-63.6902	-57.1899				72.8	-63.6902	-57.1899
72.85	-63.9954	-57.1899								72.85	-63.9954	-57.1899				72.85	-63.9954	-57.1899
72.9	-63.8123	-57.0679								72.9	-63.8123	-57.0679				72.9	-63.8123	-57.0679
72.95	-63.7512	-56.8848								72.95	-63.7512	-56.8848				72.95	-63.7512	-56.8848
73	-63.9038	-57.2205								73	-63.9038	-57.2205				73	-63.9038	-57.2205
73.05	-63.8428	-57.2205								73.05	-63.8428	-57.2205				73.05	-63.8428	-57.2205
73.1	-63.9038	-57.1594								73.1	-63.9038	-57.1594				73.1	-63.9038	-57.1594
73.15	-63.9648	-57.0679								73.15	-63.9648	-57.0679				73.15	-63.9648	-57.0679
73.2	-63.8123	-57.0374								73.2	-63.8123	-57.0374				73.2	-63.8123	-57.0374
73.25	-63.8733	-57.1899								73.25	-63.8733	-57.1899				73.25	-63.8733	-57.1899
73.3	-63.9343	-57.1594								73.3	-63.9343	-57.1594				73.3	-63.9343	-57.1594
73.35	-63.7512	-57.0984								73.35	-63.7512	-57.0984				73.35	-63.7512	-57.0984
73.4	-63.8733	-56.8542								73.4	-63.8733	-56.8542				73.4	-63.8733	-56.8542
73.45	-63.9038	-57.0068								73.45	-63.9038	-57.0068				73.45	-63.9038	-57.0068
73.5	-63.8123	-57.2815								73.5	-63.8123	-57.2815				73.5	-63.8123	-57.2815
73.55	-63.7512	-57.0984								73.55	-63.7512	-57.0984				73.55	-63.7512	-57.0984
73.6	-63.8733	-57.0679								73.6	-63.8733	-57.0679				73.6	-63.8733	-57.0679
73.65	-63.9038	-56.9153								73.65	-63.9038	-56.9153				73.65	-63.9038	-56.9153
73.7	-63.7207	-57.1289								73.7	-63.7207	-57.1289				73.7	-63.7207	-57.1289
73.75	-63.9954	-57.2205								73.75	-63.9954	-57.2205				73.75	-63.9954	-57.2205
73.8	-63.8733	-57.0679								73.8	-63.8733	-57.0679				73.8	-63.8733	-57.0679
73.85	-63.6902	-57.0374								73.85	-63.6902	-57.0374				73.85	-63.6902	-57.0374
73.9	-63.9954	-56.8848								73.9	-63.9954	-56.8848				73.9	-63.9954	-56.8848
73.95	-63.9038	-56.9458								73.95	-63.9038	-56.9458				73.95	-63.9038	-56.9458
74	-63.7207	-57.1289								74	-63.7207	-57.1289				74	-63.7207	-57.1289
74.05	-63.9343	-57.0068								74.05	-63.9343	-57.0068				74.05	-63.9343	-57.0068
74.1	-63.9343	-56.9763								74.1	-63.9343	-56.9763				74.1	-63.9343	-56.9763
74.15	-63.7207	-56.9458								74.15	-63.7207	-56.9458				74.15	-63.7207	-56.9458
74.2	-63.6291	-56.7322								74.2	-63.6291	-56.7322				74.2	-63.6291	-56.7322
74.25	-64.0259	-57.0679								74.25	-64.0259	-57.0679				74.25	-64.0259	-57.0679
74.3	-63.9343	-56.9763								74.3	-63.9343	-56.9763				74.3	-63.9343	-56.9763
74.35	-63.5986	-57.0679								74.35	-63.5986	-57.0679				74.35	-63.5986	-57.0679
74.4	-63.9038	-56.9763								74.4	-63.9038	-56.9763				74.4	-63.9038	-56.9763
74.45	-63.9038	-56.8542								74.45	-63.9038	-56.8542				74.45	-63.9038	-56.8542
74.5	-63.7512	-56.9153								74.5	-63.7512	-56.9153				74.5	-63.7512	-56.9153
74.55	-63.7512	-57.1899								74.55	-63.7512	-57.1899				74.55	-63.7512	-57.1899
74.6	-63.9954	-57.1594								74.6	-63.9954	-57.1594				74.6	-63.9954	-57.1594
74.65	-63.9038	-57.0374								74.65	-63.9038	-57.0374				74.65	-63.9038	-57.0374
74.7	-63.6902	-57.0068								74.7	-63.6902	-57.0068				74.7	-63.6902	-57.0068
74.75	-63.9038	-57.0068								74.75	-63.9038	-57.0068				74.75	-63.9038	-57.0068
74.8	-63.9648	-56.9458								74.8	-63.9648	-56.9458				74.8	-63.9648	-56.9458
74.85	-63.8123	-57.1289								74.85	-63.8123	-57.1289				74.85	-63.8123	-57.1289
74.9	-63.8123	-57.1289								74.9	-63.8123	-57.1289				74.9	-63.8123	-57.1289
74.95	-63.9954	-57.0984								74.95	-63.9954	-57.0984				74.95	-63.9954	-57.0984
75	-63.8428	-57.0984								75	-63.8428	-57.0984				75	-63.8428	-57.0984
75.05	-63.7817	-57.0984								75.05	-63.7817	-57.0984				75.05	-63.7817	-57.0984
75.1	-63.8123	-56.8237								75.1	-63.8123	-56.8237				75.1	-63.8123	-56.8237
75.15	-63.9648	-57.0068								75.15	-63.9648	-57.0068				75.15	-63.9648	-57.0068
75.2	-63.8428	-57.1594								75.2	-63.8428	-57.1594				75.2	-63.8428	-57.1594
75.25	-63.5071	-57.2205								75.25	-63.5071	-57.2205				75.25	-63.5071	-57.2205
75.3	-63.8123	-57.0984								75.3	-63.8123	-57.0984				75.3	-63.8123	-57.0984
75.35	-63.8733	-57.0068								75.35	-63.8733	-57.0068				75.35	-63.8733	-57.0068
75.4	-63.8123	-57.0679								75.4	-63.8123	-57.0679				75.4	-63.8123	-57.0679
75.45	-63.5681	-56.8848								75.45	-63.5681	-56.8848				75.45	-63.5681	-56.8848
75.5	-63.8123	-57.0679								75.5	-63.8123	-57.0679				75.5	-63.8123	-57.0679
75.55	-63.7817	-57.0984								75.55	-63.7817	-57.0984				75.55	-63.7817	-57.0984
75.6	-63.8428	-57.2205								75.6	-63.8428	-57.2205				75.6	-63.8428	-57.2205
75.65	-63.5376	-57.0984								75.65	-63.5376	-57.0984				75.65	-63.5376	-57.0984
75.7	-63.7817	-57.0068								75.7	-63.7817	-57.0068				75.7	-63.7817	-57.0068
75.75	-63.8733	-56.9153								75.75	-63.8733	-56.9153				75.75	-63.8733	-56.9153
75.8	-63.7817	-56.8542								75.8	-63.7817	-56.8542				75.8	-63.7817	-56.8542
75.85	-63.5986	-56.9458								75.85	-63.5986	-56.9458				75.85	-63.5986	-56.9458
75.9	-63.7817	-57.0068								75.9	-63.7817	-57.0068				75.9	-63.7817	-57.0068
75.95	-63.9038	-57.0679								75.95	-63.9038	-57.0679				75.95	-63.9038	-57.0679
76	-63.7817	-57.0679								76	-63.7817	-57.0679				76	-63.7817	-57.0679
76.05	-63.6291	-57.0068								76.05	-63.6291	-57.0068				76.05	-63.6291	-57.0068
76.1	-63.6902	-56.9763								76.1	-63.6902	-56.9763				76.1	-63.6902	-56.9763
76.15	-63.9648	-56.8542								76.15	-63.9648	-56.8542				76.15	-63.9648	-56.8542
76.2	-63.8733	-56.7932								76.2	-63.8733	-56.7932				76.2	-63.8733	-56.7932
76.25	-63.6902	-56.8848								76.25	-63.6902	-56.8848				76.25	-63.6902	-56.8848
76.3	-63.5681	-57.0068								76.3	-63.5681	-57.0068				76.3	-63.5681	-57.0068
76.35	-63.9343	-57.0068								76.35	-63.9343	-57.0068				76.35	-63.9343	-57.0068
76.4	-63.7817	-56.9458								76.4	-63.7817	-56.9458				76.4	-63.7817	-56.9458
76.45	-63.7817	-56.9458								76.45	-63.7817	-56.9458				76.45	-63.7817	-56.9458
76.5	-63.5376	-56.7322								76.5	-63.5376	-56.7322				76.5	-63.5376	-56.7322
76.55	-63.8123	-57.0374								76.55	-63.8123	-57.0374				76.55	-63.8123	-57.0374
76.6	-63.9038	-57.0679								76.6	-63.9038	-57.0679				76.6	-63.9038	-57.0679
76.65	-63.8123	-57.1594								76.65	-63.8123	-57.1594				76.65	-63.8123	-57.1594
76.7	-63.5986	-56.7627								76.7	-63.5986	-56.7627				76.7	-63.5986	-56.7627
76.75	-63.5376	-57.1289								76.75	-63.5376	-57.1289				76.75	-63.5376	-57.1289
76.8	-63.9343	-57.0374								76.8	-63.9343	-57.0374				76.8	-63.9343	-57.0374
76.85	-63.8428	-56.7627								76.85	-63.8428	-56.7627				76.85	-63.8428	-56.7627
76.9	-63.8428	-57.1594								76.9	-63.8428	-57.1594				76.9	-63.8428	-57.1594
76.95	-63.6597	-56.9763								76.95	-63.6597	-56.9763				76.95	-63.6597	-56.9763
77	-63.6902	-56.8237								77	-63.6902	-56.8237				77	-63.6902	-56.8237
77.05	-63.9343	-57.1899								77.05	-63.9343	-57.1899				77.05	-63.9343	-57.1899
77.1	-63.7817	-56.9458								77.1	-63.7817	-56.9458				77.1	-63.7817	-56.9458
77.15	-63.8123	-57.0374								77.15	-63.8123	-57.0374				77.15	-63.8123	-57.0374
77.2	-63.7817	-56.9763								77.2	-63.7817	-56.9763				77.2	-63.7817	-56.9763
77.25	-63.7817	-56.7932								77.25	-63.7817	-56.7932				77.25	-63.7817	-56.7932
77.3	-63.8123	-57.0984								77.3	-63.8123	-57.0984				77.3	-63.8123	-57.0984
77.35	-63.7817	-57.0068								77.35	-63.7817	-57.0068				77.35	-63.7817	-57.0068
77.4	-63.8123	-56.9153								77.4	-63.8123	-56.9153				77.4	-63.8123	-56.9153
77.45	-63.5681	-57.0679								77.45	-63.5681	-57.0679				77.45	-63.5681	-57.0679
77.5	-63.5986	-56.8542								77.5	-63.5986	-56.8542				77.5	-63.5986	-56.8542
77.55	-63.8123	-57.1594								77.55	-63.8123	-57.1594				77.55	-63.8123	-57.1594
77.6	-63.7207	-57.0068								77.6	-63.7207	-57.0068				77.6	-63.7207	-57.0068
77.65	-63.7512	-57.0374								77.65	-63.7512	-57.0374				77.65	-63.7512	-57.0374
77.7	-63.6291	-57.0984								77.7	-63.6291	-57.0984				77.7	-63.6291	-57.0984
77.75	-63.5376	-56.8542								77.75	-63.5376	-56.8542				77.75	-63.5376	-56.8542
77.8	-63.7512	-57.2205								77.8	-63.7512	-57.2205				77.8	-63.7512	-57.2205
77.85	-63.8428	-57.0679								77.85	-63.8428	-57.0679				77.85	-63.8428	-57.0679
77.9	-63.7512	-56.9153								77.9	-63.7512	-56.9153				77.9	-63.7512	-56.9153
77.95	-63.7207	-57.2815								77.95	-63.7207	-57.2815				77.95	-63.7207	-57.2815
78	-63.5681	-57.0679								78	-63.5681	-57.0679				78	-63.5681	-57.0679
78.05	-63.6902	-56.8542								78.05	-63.6902	-56.8542				78.05	-63.6902	-56.8542
78.1	-63.8733	-57.251								78.1	-63.8733	-57.251				78.1	-63.8733	-57.251
78.15	-63.8123	-57.0374								78.15	-63.8123	-57.0374				78.15	-63.8123	-57.0374
78.2	-63.7512	-56.9763								78.2	-63.7512	-56.9763				78.2	-63.7512	-56.9763
78.25	-63.7512	-57.1289								78.25	-63.7512	-57.1289				78.25	-63.7512	-57.1289
78.3	-63.6291	-57.0679								78.3	-63.6291	-57.0679				78.3	-63.6291	-57.0679
78.35	-63.7207	-56.8542								78.35	-63.7207	-56.8542				78.35	-63.7207	-56.8542
78.4	-63.8733	-57.251								78.4	-63.8733	-57.251				78.4	-63.8733	-57.251
78.45	-63.8733	-57.0068								78.45	-63.8733	-57.0068				78.45	-63.8733	-57.0068
78.5	-63.7817	-56.7017								78.5	-63.7817	-56.7017				78.5	-63.7817	-56.7017
78.55	-63.6597	-57.1289								78.55	-63.6597	-57.1289				78.55	-63.6597	-57.1289
78.6	-63.5986	-57.0374								78.6	-63.5986	-57.0374				78.6	-63.5986	-57.0374
78.65	-63.6597	-56.8237								78.65	-63.6597	-56.8237				78.65	-63.6597	-56.8237
78.7	-63.8123	-57.0374								78.7	-63.8123	-57.0374				78.7	-63.8123	-57.0374
78.75	-63.8428	-57.0984								78.75	-63.8428	-57.0984				78.75	-63.8428	-57.0984
78.8	-63.6597	-56.9458								78.8	-63.6597	-56.9458				78.8	-63.6597	-56.9458
78.85	-63.7512	-56.9763								78.85	-63.7512	-56.9763				78.85	-63.7512	-56.9763
78.9	-63.6902	-57.0679								78.9	-63.6902	-57.0679				78.9	-63.6902	-57.0679
78.95	-63.5681	-57.0679								78.95	-63.5681	-57.0679				78.95	-63.5681	-57.0679
79	-63.6291	-56.8542								79	-63.6291	-56.8542				79	-63.6291	-56.8542
79.05	-63.7512	-57.1289								79.05	-63.7512	-57.1289				79.05	-63.7512	-57.1289
79.1	-63.8428	-57.0374								79.1	-63.8428	-57.0374				79.1	-63.8428	-57.0374
79.15	-63.7817	-56.9763								79.15	-63.7817	-56.9763				79.15	-63.7817	-56.9763
79.2	-63.6291	-57.0374								79.2	-63.6291	-57.0374				79.2	-63.6291	-57.0374
79.25	-63.6291	-57.0679								79.25	-63.6291	-57.0679				79.25	-63.6291	-57.0679
79.3	-63.5071	-57.0374								79.3	-63.5071	-57.0374				79.3	-63.5071	-57.0374
79.35	-63.5681	-56.8237								79.35	-63.5681	-56.8237				79.35	-63.5681	-56.8237
79.4	-63.7207	-57.1289								79.4	-63.7207	-57.1289				79.4	-63.7207	-57.1289
79.45	-63.7512	-57.0679								79.45	-63.7512	-57.0679				79.45	-63.7512	-57.0679
79.5	-63.6291	-56.9458								79.5	-63.6291	-56.9458				79.5	-63.6291	-56.9458
79.55	-63.6597	-56.9153								79.55	-63.6597	-56.9153				79.55	-63.6597	-56.9153
79.6	-63.4766	-57.1899								79.6	-63.4766	-57.1899				79.6	-63.4766	-57.1899
79.65	-63.4766	-57.1289								79.65	-63.4766	-57.1289				79.65	-63.4766	-57.1289
79.7	-63.7207	-56.9153								79.7	-63.7207	-56.9153				79.7	-63.7207	-56.9153
79.75	-63.6291	-57.1289								79.75	-63.6291	-57.1289				79.75	-63.6291	-57.1289
79.8	-63.5986	-57.1594								79.8	-63.5986	-57.1594				79.8	-63.5986	-57.1594
79.85	-63.2935	-57.0679								79.85	-63.2935	-57.0679				79.85	-63.2935	-57.0679
79.9	-63.5681	-56.8237								79.9	-63.5681	-56.8237				79.9	-63.5681	-56.8237
79.95	-63.5681	-57.1289								79.95	-63.5681	-57.1289				79.95	-63.5681	-57.1289
80	-63.4766	-57.1289								80	-63.4766	-57.1289				80	-63.4766	-57.1289
80.05	-63.446	-57.0068								80.05	-63.446	-57.0068				80.05	-63.446	-57.0068
80.1	-63.5986	-56.7627								80.1	-63.5986	-56.7627				80.1	-63.5986	-56.7627
80.15	-63.4766	-57.1289								80.15	-63.4766	-57.1289				80.15	-63.4766	-57.1289
80.2	-63.4766	-57.0984								80.2	-63.4766	-57.0984				80.2	-63.4766	-57.0984
80.25	-63.5681	-57.0068								80.25	-63.5681	-57.0068				80.25	-63.5681	-57.0068
80.3	-63.324	-56.8542								80.3	-63.324	-56.8542				80.3	-63.324	-56.8542
80.35	-63.7512	-57.1289								80.35	-63.7512	-57.1289				80.35	-63.7512	-57.1289
80.4	-63.5681	-57.0679								80.4	-63.5681	-57.0679				80.4	-63.5681	-57.0679
80.45	-63.385	-57.0068								80.45	-63.385	-57.0068				80.45	-63.385	-57.0068
80.5	-63.5681	-56.8542								80.5	-63.5681	-56.8542				80.5	-63.5681	-56.8542
80.55	-63.446	-57.1289								80.55	-63.446	-57.1289				80.55	-63.446	-57.1289
80.6	-63.6597	-57.0068								80.6	-63.6597	-57.0068				80.6	-63.6597	-57.0068
80.65	-63.5376	-56.9458								80.65	-63.5376	-56.9458				80.65	-63.5376	-56.9458
80.7	-63.4155	-56.8237								80.7	-63.4155	-56.8237				80.7	-63.4155	-56.8237
80.75	-63.5376	-57.1594								80.75	-63.5376	-57.1594				80.75	-63.5376	-57.1594
80.8	-63.324	-57.0374								80.8	-63.324	-57.0374				80.8	-63.324	-57.0374
80.85	-63.6291	-57.0679								80.85	-63.6291	-57.0679				80.85	-63.6291	-57.0679
80.9	-63.4155	-56.7932								80.9	-63.4155	-56.7932				80.9	-63.4155	-56.7932
80.95	-63.446	-57.0068								80.95	-63.446	-57.0068				80.95	-63.446	-57.0068
81	-63.446	-57.0374								81	-63.446	-57.0374				81	-63.446	-57.0374
81.05	-63.2935	-57.1289								81.05	-63.2935	-57.1289				81.05	-63.2935	-57.1289
81.1	-63.5986	-56.9458								81.1	-63.5986	-56.9458				81.1	-63.5986	-56.9458
81.15	-63.4155	-56.9153								81.15	-63.4155	-56.9153				81.15	-63.4155	-56.9153
81.2	-63.3545	-57.1289								81.2	-63.3545	-57.1289				81.2	-63.3545	-57.1289
81.25	-63.5376	-57.0374								81.25	-63.5376	-57.0374				81.25	-63.5376	-57.0374
81.3	-63.446	-57.0068								81.3	-63.446	-57.0068				81.3	-63.446	-57.0068
81.35	-63.324	-56.7932								81.35	-63.324	-56.7932				81.35	-63.324	-56.7932
81.4	-63.5986	-56.9458								81.4	-63.5986	-56.9458				81.4	-63.5986	-56.9458
81.45	-63.385	-57.1899								81.45	-63.385	-57.1899				81.45	-63.385	-57.1899
81.5	-63.385	-57.0679								81.5	-63.385	-57.0679				81.5	-63.385	-57.0679
81.55	-63.446	-56.8848								81.55	-63.446	-56.8848				81.55	-63.446	-56.8848
81.6	-63.4155	-56.7627								81.6	-63.4155	-56.7627				81.6	-63.4155	-56.7627
81.65	-63.446	-57.1594								81.65	-63.446	-57.1594				81.65	-63.446	-57.1594
81.7	-63.4766	-57.0984								81.7	-63.4766	-57.0984				81.7	-63.4766	-57.0984
81.75	-63.446	-57.0984								81.75	-63.446	-57.0984				81.75	-63.446	-57.0984
81.8	-63.324	-56.8848								81.8	-63.324	-56.8848				81.8	-63.324	-56.8848
81.85	-63.5071	-56.8848								81.85	-63.5071	-56.8848				81.85	-63.5071	-56.8848
81.9	-63.3545	-57.1594								81.9	-63.3545	-57.1594				81.9	-63.3545	-57.1594
81.95	-63.2019	-57.0374								81.95	-63.2019	-57.0374				81.95	-63.2019	-57.0374
82	-63.5376	-57.0374								82	-63.5376	-57.0374				82	-63.5376	-57.0374
82.05	-63.446	-56.9763								82.05	-63.446	-56.9763				82.05	-63.446	-56.9763
82.1	-63.2324	-56.9153								82.1	-63.2324	-56.9153				82.1	-63.2324	-56.9153
82.15	-63.4766	-57.1594								82.15	-63.4766	-57.1594				82.15	-63.4766	-57.1594
82.2	-63.4155	-57.0984								82.2	-63.4155	-57.0984				82.2	-63.4155	-57.0984
82.25	-63.2324	-57.0679								82.25	-63.2324	-57.0679				82.25	-63.2324	-57.0679
82.3	-63.385	-57.0679								82.3	-63.385	-57.0679				82.3	-63.385	-57.0679
82.35	-63.4766	-57.0068								82.35	-63.4766	-57.0068				82.35	-63.4766	-57.0068
82.4	-63.385	-57.0984								82.4	-63.385	-57.0984				82.4	-63.385	-57.0984
82.45	-63.3545	-57.2205								82.45	-63.3545	-57.2205				82.45	-63.3545	-57.2205
82.5	-63.5681	-57.1899								82.5	-63.5681	-57.1899				82.5	-63.5681	-57.1899
82.55	-63.446	-57.1289								82.55	-63.446	-57.1289				82.55	-63.446	-57.1289
82.6	-63.2019	-56.9153								82.6	-63.2019	-56.9153				82.6	-63.2019	-56.9153
82.65	-63.5986	-56.9763								82.65	-63.5986	-56.9763				82.65	-63.5986	-56.9763
82.7	-63.5071	-57.2815								82.7	-63.5071	-57.2815				82.7	-63.5071	-57.2815
82.75	-63.324	-57.1899								82.75	-63.324	-57.1899				82.75	-63.324	-57.1899
82.8	-63.3545	-57.1899								82.8	-63.3545	-57.1899				82.8	-63.3545	-57.1899
82.85	-63.5986	-57.0679								82.85	-63.5986	-57.0679				82.85	-63.5986	-57.0679
82.9	-63.5376	-56.8848								82.9	-63.5376	-56.8848				82.9	-63.5376	-56.8848
82.95	-63.2019	-57.0679								82.95	-63.2019	-57.0679				82.95	-63.2019	-57.0679
83	-63.446	-57.251								83	-63.446	-57.251				83	-63.446	-57.251
83.05	-63.4766	-57.1594								83.05	-63.4766	-57.1594				83.05	-63.4766	-57.1594
83.1	-63.324	-57.0984								83.1	-63.324	-57.0984				83.1	-63.324	-57.0984
83.15	-63.2935	-57.0984								83.15	-63.2935	-57.0984				83.15	-63.2935	-57.0984
83.2	-63.5071	-56.9153								83.2	-63.5071	-56.9153				83.2	-63.5071	-56.9153
83.25	-63.5071	-57.0374								83.25	-63.5071	-57.0374				83.25	-63.5071	-57.0374
83.3	-63.2629	-57.1899								83.3	-63.2629	-57.1899				83.3	-63.2629	-57.1899
83.35	-63.385	-57.312								83.35	-63.385	-57.312				83.35	-63.385	-57.312
83.4	-63.5376	-57.1899								83.4	-63.5376	-57.1899				83.4	-63.5376	-57.1899
83.45	-63.4155	-57.1289								83.45	-63.4155	-57.1289				83.45	-63.4155	-57.1289
83.5	-63.1714	-57.0374								83.5	-63.1714	-57.0374				83.5	-63.1714	-57.0374
83.55	-63.5071	-56.9763								83.55	-63.5071	-56.9763				83.55	-63.5071	-56.9763
83.6	-63.446	-57.1289								83.6	-63.446	-57.1289				83.6	-63.446	-57.1289
83.65	-63.4155	-57.312								83.65	-63.4155	-57.312				83.65	-63.4155	-57.312
83.7	-63.2935	-57.1594								83.7	-63.2935	-57.1594				83.7	-63.2935	-57.1594
83.75	-63.6291	-57.0984								83.75	-63.6291	-57.0984				83.75	-63.6291	-57.0984
83.8	-63.4155	-57.1289								83.8	-63.4155	-57.1289				83.8	-63.4155	-57.1289
83.85	-63.385	-56.9763								83.85	-63.385	-56.9763				83.85	-63.385	-56.9763
83.9	-63.2019	-56.8237								83.9	-63.2019	-56.8237				83.9	-63.2019	-56.8237
83.95	-63.5376	-57.0374								83.95	-63.5376	-57.0374				83.95	-63.5376	-57.0374
84	-63.4155	-57.1899								84	-63.4155	-57.1899				84	-63.4155	-57.1899
84.05	-63.3545	-57.1289								84.05	-63.3545	-57.1289				84.05	-63.3545	-57.1289
84.1	-63.1409	-57.0068								84.1	-63.1409	-57.0068				84.1	-63.1409	-57.0068
84.15	-63.5376	-57.0068								84.15	-63.5376	-57.0068				84.15	-63.5376	-57.0068
84.2	-63.385	-56.9763								84.2	-63.385	-56.9763				84.2	-63.385	-56.9763
84.25	-63.2935	-56.7932								84.25	-63.2935	-56.7932				84.25	-63.2935	-56.7932
84.3	-63.0493	-56.8237								84.3	-63.0493	-56.8237				84.3	-63.0493	-56.8237
84.35	-63.3545	-56.9153								84.35	-63.3545	-56.9153				84.35	-63.3545	-56.9153
84.4	-63.385	-57.1289								84.4	-63.385	-57.1289				84.4	-63.385	-57.1289
84.45	-63.3545	-57.0984								84.45	-63.3545	-57.0984				84.45	-63.3545	-57.0984
84.5	-63.0798	-57.0374								84.5	-63.0798	-57.0374				84.5	-63.0798	-57.0374
84.55	-63.385	-57.0068								84.55	-63.385	-57.0068				84.55	-63.385	-57.0068
84.6	-63.4155	-56.9763								84.6	-63.4155	-56.9763				84.6	-63.4155	-56.9763
84.65	-63.3545	-56.8848								84.65	-63.3545	-56.8848				84.65	-63.3545	-56.8848
84.7	-63.1714	-56.8237								84.7	-63.1714	-56.8237				84.7	-63.1714	-56.8237
84.75	-63.2324	-57.0374								84.75	-63.2324	-57.0374				84.75	-63.2324	-57.0374
84.8	-63.5376	-57.0984								84.8	-63.5376	-57.0984				84.8	-63.5376	-57.0984
84.85	-63.324	-57.0679								84.85	-63.324	-57.0679				84.85	-63.324	-57.0679
84.9	-63.324	-56.7322								84.9	-63.324	-56.7322				84.9	-63.324	-56.7322
84.95	-63.1409	-56.8237								84.95	-63.1409	-56.8237				84.95	-63.1409	-56.8237
85	-63.4155	-56.9763								85	-63.4155	-56.9763				85	-63.4155	-56.9763
85.05	-63.324	-56.8848								85.05	-63.324	-56.8848				85.05	-63.324	-56.8848
85.1	-63.385	-56.5796								85.1	-63.385	-56.5796				85.1	-63.385	-56.5796
85.15	-63.2324	-56.8542								85.15	-63.2324	-56.8542				85.15	-63.2324	-56.8542
85.2	-63.1409	-56.7627								85.2	-63.1409	-56.7627				85.2	-63.1409	-56.7627
85.25	-63.385	-56.5796								85.25	-63.385	-56.5796				85.25	-63.385	-56.5796
85.3	-63.2935	-56.8848								85.3	-63.2935	-56.8848				85.3	-63.2935	-56.8848
85.35	-63.2935	-56.6711								85.35	-63.2935	-56.6711				85.35	-63.2935	-56.6711
85.4	-63.1103	-56.5491								85.4	-63.1103	-56.5491				85.4	-63.1103	-56.5491
85.45	-63.1103	-56.9153								85.45	-63.1103	-56.9153				85.45	-63.1103	-56.9153
85.5	-63.324	-56.6406								85.5	-63.324	-56.6406				85.5	-63.324	-56.6406
85.55	-63.2629	-56.8542								85.55	-63.2629	-56.8542				85.55	-63.2629	-56.8542
85.6	-63.324	-56.7017								85.6	-63.324	-56.7017				85.6	-63.324	-56.7017
85.65	-63.1714	-56.6406								85.65	-63.1714	-56.6406				85.65	-63.1714	-56.6406
85.7	-63.1714	-56.8237								85.7	-63.1714	-56.8237				85.7	-63.1714	-56.8237
85.75	-63.324	-56.6101								85.75	-63.324	-56.6101				85.75	-63.324	-56.6101
85.8	-63.385	-56.8237								85.8	-63.385	-56.8237				85.8	-63.385	-56.8237
85.85	-63.2629	-56.7627								85.85	-63.2629	-56.7627				85.85	-63.2629	-56.7627
85.9	-63.2019	-56.6101								85.9	-63.2019	-56.6101				85.9	-63.2019	-56.6101
85.95	-63.0798	-56.7627								85.95	-63.0798	-56.7627				85.95	-63.0798	-56.7627
86	-63.385	-56.5491								86	-63.385	-56.5491				86	-63.385	-56.5491
86.05	-63.385	-56.6711								86.05	-63.385	-56.6711				86.05	-63.385	-56.6711
86.1	-63.2019	-56.7322								86.1	-63.2019	-56.7322				86.1	-63.2019	-56.7322
86.15	-63.1714	-56.4575								86.15	-63.1714	-56.4575				86.15	-63.1714	-56.4575
86.2	-62.9578	-56.7017								86.2	-62.9578	-56.7017				86.2	-62.9578	-56.7017
86.25	-63.1409	-56.7322								86.25	-63.1409	-56.7322				86.25	-63.1409	-56.7322
86.3	-63.2935	-56.427								86.3	-63.2935	-56.427				86.3	-63.2935	-56.427
86.35	-63.1714	-56.7627								86.35	-63.1714	-56.7627				86.35	-63.1714	-56.7627
86.4	-63.2019	-56.6711								86.4	-63.2019	-56.6711				86.4	-63.2019	-56.6711
86.45	-63.2019	-56.366								86.45	-63.2019	-56.366				86.45	-63.2019	-56.366
86.5	-62.9578	-56.8542								86.5	-62.9578	-56.8542				86.5	-62.9578	-56.8542
86.55	-63.1103	-56.6711								86.55	-63.1103	-56.6711				86.55	-63.1103	-56.6711
86.6	-63.2324	-56.488								86.6	-63.2324	-56.488				86.6	-63.2324	-56.488
86.65	-63.2324	-56.7627								86.65	-63.2324	-56.7627				86.65	-63.2324	-56.7627
86.7	-63.2019	-56.7932								86.7	-63.2019	-56.7932				86.7	-63.2019	-56.7932
86.75	-63.2019	-56.3965								86.75	-63.2019	-56.3965				86.75	-63.2019	-56.3965
86.8	-63.0188	-56.7627								86.8	-63.0188	-56.7627				86.8	-63.0188	-56.7627
86.85	-63.2324	-56.6406								86.85	-63.2324	-56.6406				86.85	-63.2324	-56.6406
86.9	-63.324	-56.6406								86.9	-63.324	-56.6406				86.9	-63.324	-56.6406
86.95	-63.2629	-56.7322								86.95	-63.2629	-56.7322				86.95	-63.2629	-56.7322
87	-63.2324	-56.7322								87	-63.2324	-56.7322				87	-63.2324	-56.7322
87.05	-63.2935	-56.7017								87.05	-63.2935	-56.7017				87.05	-63.2935	-56.7017
87.1	-63.1409	-56.5796								87.1	-63.1409	-56.5796				87.1	-63.1409	-56.5796
87.15	-63.1714	-56.8542								87.15	-63.1714	-56.8542				87.15	-63.1714	-56.8542
87.2	-63.385	-56.7017								87.2	-63.385	-56.7017				87.2	-63.385	-56.7017
87.25	-63.4155	-56.427								87.25	-63.4155	-56.427				87.25	-63.4155	-56.427
87.3	-63.3545	-56.8542								87.3	-63.3545	-56.8542				87.3	-63.3545	-56.8542
87.35	-63.3545	-56.7932								87.35	-63.3545	-56.7932				87.35	-63.3545	-56.7932
87.4	-63.2324	-56.6406								87.4	-63.2324	-56.6406				87.4	-63.2324	-56.6406
87.45	-63.2324	-56.6711								87.45	-63.2324	-56.6711				87.45	-63.2324	-56.6711
87.5	-63.2324	-56.8848								87.5	-63.2324	-56.8848				87.5	-63.2324	-56.8848
87.55	-63.2935	-56.7627								87.55	-63.2935	-56.7627				87.55	-63.2935	-56.7627
87.6	-63.324	-56.5491								87.6	-63.324	-56.5491				87.6	-63.324	-56.5491
87.65	-63.324	-56.8542								87.65	-63.324	-56.8542				87.65	-63.324	-56.8542
87.7	-63.3545	-56.7627								87.7	-63.3545	-56.7627				87.7	-63.3545	-56.7627
87.75	-63.2629	-56.7932								87.75	-63.2629	-56.7932				87.75	-63.2629	-56.7932
87.8	-63.2019	-56.6406								87.8	-63.2019	-56.6406				87.8	-63.2019	-56.6406
87.85	-62.9883	-56.9153								87.85	-62.9883	-56.9153				87.85	-62.9883	-56.9153
87.9	-63.324	-56.8542								87.9	-63.324	-56.8542				87.9	-63.324	-56.8542
87.95	-63.385	-56.7627								87.95	-63.385	-56.7627				87.95	-63.385	-56.7627
88	-63.324	-56.8848								88	-63.324	-56.8848				88	-63.324	-56.8848
88.05	-63.324	-57.0068								88.05	-63.324	-57.0068				88.05	-63.324	-57.0068
88.1	-63.1714	-56.8542								88.1	-63.1714	-56.8542				88.1	-63.1714	-56.8542
88.15	-63.3545	-56.6406								88.15	-63.3545	-56.6406				88.15	-63.3545	-56.6406
88.2	-63.4155	-56.9153								88.2	-63.4155	-56.9153				88.2	-63.4155	-56.9153
88.25	-63.385	-56.8848								88.25	-63.385	-56.8848				88.25	-63.385	-56.8848
88.3	-63.1103	-56.8542								88.3	-63.1103	-56.8542				88.3	-63.1103	-56.8542
88.35	-63.4155	-56.6711								88.35	-63.4155	-56.6711				88.35	-63.4155	-56.6711
88.4	-63.3545	-56.8848								88.4	-63.3545	-56.8848				88.4	-63.3545	-56.8848
88.45	-63.0798	-56.9458								88.45	-63.0798	-56.9458				88.45	-63.0798	-56.9458
88.5	-63.385	-56.7932								88.5	-63.385	-56.7932				88.5	-63.385	-56.7932
88.55	-63.3545	-56.5491								88.55	-63.3545	-56.5491				88.55	-63.3545	-56.5491
88.6	-63.1714	-56.9763								88.6	-63.1714	-56.9763				88.6	-63.1714	-56.9763
88.65	-63.3545	-56.9153								88.65	-63.3545	-56.9153				88.65	-63.3545	-56.9153
88.7	-63.2324	-56.7932								88.7	-63.2324	-56.7932				88.7	-63.2324	-56.7932
88.75	-63.385	-56.5796								88.75	-63.385	-56.5796				88.75	-63.385	-56.5796
88.8	-63.324	-56.8848								88.8	-63.324	-56.8848				88.8	-63.324	-56.8848
88.85	-63.0798	-56.7932								88.85	-63.0798	-56.7932				88.85	-63.0798	-56.7932
88.9	-63.324	-56.8848								88.9	-63.324	-56.8848				88.9	-63.324	-56.8848
88.95	-63.2019	-56.5491								88.95	-63.2019	-56.5491				88.95	-63.2019	-56.5491
89	-63.385	-56.8848								89	-63.385	-56.8848				89	-63.385	-56.8848
89.05	-63.2935	-56.9153								89.05	-63.2935	-56.9153				89.05	-63.2935	-56.9153
89.1	-63.0493	-56.7932								89.1	-63.0493	-56.7932				89.1	-63.0493	-56.7932
89.15	-63.446	-56.6711								89.15	-63.446	-56.6711				89.15	-63.446	-56.6711
89.2	-63.1409	-56.7017								89.2	-63.1409	-56.7017				89.2	-63.1409	-56.7017
89.25	-63.4155	-57.0068								89.25	-63.4155	-57.0068				89.25	-63.4155	-57.0068
89.3	-63.324	-56.7017								89.3	-63.324	-56.7017				89.3	-63.324	-56.7017
89.35	-63.1409	-56.6711								89.35	-63.1409	-56.6711				89.35	-63.1409	-56.6711
89.4	-63.385	-56.5186								89.4	-63.385	-56.5186				89.4	-63.385	-56.5186
89.45	-63.1714	-56.7932								89.45	-63.1714	-56.7932				89.45	-63.1714	-56.7932
89.5	-63.324	-56.8237								89.5	-63.324	-56.8237				89.5	-63.324	-56.8237
89.55	-63.324	-56.7932								89.55	-63.324	-56.7932				89.55	-63.324	-56.7932
89.6	-63.0798	-56.6101								89.6	-63.0798	-56.6101				89.6	-63.0798	-56.6101
89.65	-63.4155	-56.7017								89.65	-63.4155	-56.7017				89.65	-63.4155	-56.7017
89.7	-63.2629	-56.9458								89.7	-63.2629	-56.9458				89.7	-63.2629	-56.9458
89.75	-63.1103	-56.7627								89.75	-63.1103	-56.7627				89.75	-63.1103	-56.7627
89.8	-63.4155	-56.7932								89.8	-63.4155	-56.7932				89.8	-63.4155	-56.7932
89.85	-63.2935	-56.7322								89.85	-63.2935	-56.7322				89.85	-63.2935	-56.7322
89.9	-63.0798	-56.8237								89.9	-63.0798	-56.8237				89.9	-63.0798	-56.8237
89.95	-63.2935	-56.9763								89.95	-63.2935	-56.9763				89.95	-63.2935	-56.9763
90	-63.2629	-56.8542								90	-63.2629	-56.8542				90	-63.2629	-56.8542
90.05	-63.1103	-56.8542								90.05	-63.1103	-56.8542				90.05	-63.1103	-56.8542
90.1	-63.3545	-56.6406								90.1	-63.3545	-56.6406				90.1	-63.3545	-56.6406
90.15	-63.2935	-56.9153								90.15	-63.2935	-56.9153				90.15	-63.2935	-56.9153
90.2	-63.2019	-56.8542								90.2	-63.2019	-56.8542				90.2	-63.2019	-56.8542
90.25	-63.446	-56.9763								90.25	-63.446	-56.9763				90.25	-63.446	-56.9763
90.3	-63.385	-56.8848								90.3	-63.385	-56.8848				90.3	-63.385	-56.8848
90.35	-63.0493	-56.6101								90.35	-63.0493	-56.6101				90.35	-63.0493	-56.6101
90.4	-63.5071	-56.8848								90.4	-63.5071	-56.8848				90.4	-63.5071	-56.8848
90.45	-63.385	-57.0679								90.45	-63.385	-57.0679				90.45	-63.385	-57.0679
90.5	-63.2324	-56.8542								90.5	-63.2324	-56.8542				90.5	-63.2324	-56.8542
90.55	-63.446	-56.7627								90.55	-63.446	-56.7627				90.55	-63.446	-56.7627
90.6	-63.385	-56.5186								90.6	-63.385	-56.5186				90.6	-63.385	-56.5186
90.65	-63.2629	-56.7627								90.65	-63.2629	-56.7627				90.65	-63.2629	-56.7627
90.7	-63.2019	-56.9458								90.7	-63.2019	-56.9458				90.7	-63.2019	-56.9458
90.75	-63.446	-56.8542								90.75	-63.446	-56.8542				90.75	-63.446	-56.8542
90.8	-63.324	-56.7322								90.8	-63.324	-56.7322				90.8	-63.324	-56.7322
90.85	-63.1409	-56.7017								90.85	-63.1409	-56.7017				90.85	-63.1409	-56.7017
90.9	-63.4766	-56.5796								90.9	-63.4766	-56.5796				90.9	-63.4766	-56.5796
90.95	-63.2935	-56.7627								90.95	-63.2935	-56.7627				90.95	-63.2935	-56.7627
91	-63.1103	-56.8848								91	-63.1103	-56.8848				91	-63.1103	-56.8848
91.05	-63.324	-56.8542								91.05	-63.324	-56.8542				91.05	-63.324	-56.8542
91.1	-63.2935	-56.8848								91.1	-63.2935	-56.8848				91.1	-63.2935	-56.8848
91.15	-63.2629	-56.7627								91.15	-63.2629	-56.7627				91.15	-63.2629	-56.7627
91.2	-63.1103	-56.6711								91.2	-63.1103	-56.6711				91.2	-63.1103	-56.6711
91.25	-63.446	-56.9153								91.25	-63.446	-56.9153				91.25	-63.446	-56.9153
91.3	-63.2935	-56.9763								91.3	-63.2935	-56.9763				91.3	-63.2935	-56.9763
91.35	-63.1409	-56.9153								91.35	-63.1409	-56.9153				91.35	-63.1409	-56.9153
91.4	-63.385	-56.7932								91.4	-63.385	-56.7932				91.4	-63.385	-56.7932
91.45	-63.385	-56.7322								91.45	-63.385	-56.7322				91.45	-63.385	-56.7322
91.5	-63.2935	-56.6406								91.5	-63.2935	-56.6406				91.5	-63.2935	-56.6406
91.55	-63.0493	-56.7932								91.55	-63.0493	-56.7932				91.55	-63.0493	-56.7932
91.6	-63.3545	-56.8848								91.6	-63.3545	-56.8848				91.6	-63.3545	-56.8848
91.65	-63.324	-56.8237								91.65	-63.324	-56.8237				91.65	-63.324	-56.8237
91.7	-63.1714	-56.8237								91.7	-63.1714	-56.8237				91.7	-63.1714	-56.8237
91.75	-63.2324	-56.7017								91.75	-63.2324	-56.7017				91.75	-63.2324	-56.7017
91.8	-63.3545	-56.6101								91.8	-63.3545	-56.6101				91.8	-63.3545	-56.6101
91.85	-63.324	-56.5491								91.85	-63.324	-56.5491				91.85	-63.324	-56.5491
91.9	-63.0188	-56.7932								91.9	-63.0188	-56.7932				91.9	-63.0188	-56.7932
91.95	-63.2324	-56.9458								91.95	-63.2324	-56.9458				91.95	-63.2324	-56.9458
92	-63.2019	-56.7932								92	-63.2019	-56.7932				92	-63.2019	-56.7932
92.05	-63.2324	-56.7932								92.05	-63.2324	-56.7932				92.05	-63.2324	-56.7932
92.1	-63.0188	-56.6101								92.1	-63.0188	-56.6101				92.1	-63.0188	-56.6101
92.15	-63.324	-56.6711								92.15	-63.324	-56.6711				92.15	-63.324	-56.6711
92.2	-63.2629	-56.5186								92.2	-63.2629	-56.5186				92.2	-63.2629	-56.5186
92.25	-63.1103	-56.6711								92.25	-63.1103	-56.6711				92.25	-63.1103	-56.6711
92.3	-63.0798	-56.8542								92.3	-63.0798	-56.8542				92.3	-63.0798	-56.8542
92.35	-63.324	-56.8848								92.35	-63.324	-56.8848				92.35	-63.324	-56.8848
92.4	-63.2935	-56.7627								92.4	-63.2935	-56.7627				92.4	-63.2935	-56.7627
92.45	-63.2324	-56.7932								92.45	-63.2324	-56.7932				92.45	-63.2324	-56.7932
92.5	-63.0798	-56.7322								92.5	-63.0798	-56.7322				92.5	-63.0798	-56.7322
92.55	-63.385	-56.7017								92.55	-63.385	-56.7017				92.55	-63.385	-56.7017
92.6	-63.2935	-56.7932								92.6	-63.2935	-56.7932				92.6	-63.2935	-56.7932
92.65	-63.2629	-56.7627								92.65	-63.2629	-56.7627				92.65	-63.2629	-56.7627
92.7	-63.0798	-56.8848								92.7	-63.0798	-56.8848				92.7	-63.0798	-56.8848
92.75	-63.446	-56.9763								92.75	-63.446	-56.9763				92.75	-63.446	-56.9763
92.8	-63.324	-56.9153								92.8	-63.324	-56.9153				92.8	-63.324	-56.9153
92.85	-63.2629	-56.8542								92.85	-63.2629	-56.8542				92.85	-63.2629	-56.8542
92.9	-63.1409	-56.7017								92.9	-63.1409	-56.7017				92.9	-63.1409	-56.7017
92.95	-63.2935	-56.7322								92.95	-63.2935	-56.7322				92.95	-63.2935	-56.7322
93	-63.3545	-56.6711								93	-63.3545	-56.6711				93	-63.3545	-56.6711
93.05	-63.2019	-56.9458								93.05	-63.2019	-56.9458				93.05	-63.2019	-56.9458
93.1	-63.1409	-56.9458								93.1	-63.1409	-56.9458				93.1	-63.1409	-56.9458
93.15	-63.1409	-56.9458								93.15	-63.1409	-56.9458				93.15	-63.1409	-56.9458
93.2	-63.446	-56.7932								93.2	-63.446	-56.7932				93.2	-63.446	-56.7932
93.25	-63.324	-56.7932								93.25	-63.324	-56.7932				93.25	-63.324	-56.7932
93.3	-63.2629	-57.0374								93.3	-63.2629	-57.0374				93.3	-63.2629	-57.0374
93.35	-63.1103	-57.0068								93.35	-63.1103	-57.0068				93.35	-63.1103	-57.0068
93.4	-63.4155	-56.8237								93.4	-63.4155	-56.8237				93.4	-63.4155	-56.8237
93.45	-63.385	-57.0679								93.45	-63.385	-57.0679				93.45	-63.385	-57.0679
93.5	-63.385	-57.0068								93.5	-63.385	-57.0068				93.5	-63.385	-57.0068
93.55	-63.385	-56.7932								93.55	-63.385	-56.7932				93.55	-63.385	-56.7932
93.6	-63.2324	-57.1289								93.6	-63.2324	-57.1289				93.6	-63.2324	-57.1289
93.65	-63.446	-57.0984								93.65	-63.446	-57.0984				93.65	-63.446	-57.0984
93.7	-63.385	-56.8237								93.7	-63.385	-56.8237				93.7	-63.385	-56.8237
93.75	-63.385	-57.0679								93.75	-63.385	-57.0679				93.75	-63.385	-57.0679
93.8	-63.2324	-56.9458								93.8	-63.2324	-56.9458				93.8	-63.2324	-56.9458
93.85	-63.2324	-57.0068								93.85	-63.2324	-57.0068				93.85	-63.2324	-57.0068
93.9	-63.4766	-57.0068								93.9	-63.4766	-57.0068				93.9	-63.4766	-57.0068
93.95	-63.4155	-56.6711								93.95	-63.4155	-56.6711				93.95	-63.4155	-56.6711
94	-63.446	-57.0679								94	-63.446	-57.0679				94	-63.446	-57.0679
94.05	-63.1409	-56.8848								94.05	-63.1409	-56.8848				94.05	-63.1409	-56.8848
94.1	-63.2629	-56.9763								94.1	-63.2629	-56.9763				94.1	-63.2629	-56.9763
94.15	-63.4766	-56.9458								94.15	-63.4766	-56.9458				94.15	-63.4766	-56.9458
94.2	-63.3545	-56.7017								94.2	-63.3545	-56.7017				94.2	-63.3545	-56.7017
94.25	-63.324	-57.0984								94.25	-63.324	-57.0984				94.25	-63.324	-57.0984
94.3	-63.2324	-56.9763								94.3	-63.2324	-56.9763				94.3	-63.2324	-56.9763
94.35	-63.1714	-56.7932								94.35	-63.1714	-56.7932				94.35	-63.1714	-56.7932
94.4	-63.4766	-56.9763								94.4	-63.4766	-56.9763				94.4	-63.4766	-56.9763
94.45	-63.385	-56.8848								94.45	-63.385	-56.8848				94.45	-63.385	-56.8848
94.5	-63.4155	-57.0679								94.5	-63.4155	-57.0679				94.5	-63.4155	-57.0679
94.55	-63.2019	-57.0374								94.55	-63.2019	-57.0374				94.55	-63.2019	-57.0374
94.6	-63.2019	-56.7932								94.6	-63.2019	-56.7932				94.6	-63.2019	-56.7932
94.65	-63.3545	-57.1594								94.65	-63.3545	-57.1594				94.65	-63.3545	-57.1594
94.7	-63.4766	-57.0679								94.7	-63.4766	-57.0679				94.7	-63.4766	-57.0679
94.75	-63.324	-56.7322								94.75	-63.324	-56.7322				94.75	-63.324	-56.7322
94.8	-63.385	-57.1289								94.8	-63.385	-57.1289				94.8	-63.385	-57.1289
94.85	-63.2935	-57.0679								94.85	-63.2935	-57.0679				94.85	-63.2935	-57.0679
94.9	-63.2324	-56.8542								94.9	-63.2324	-56.8542				94.9	-63.2324	-56.8542
94.95	-63.446	-57.0984								94.95	-63.446	-57.0984				94.95	-63.446	-57.0984
95	-63.5071	-57.0068								95	-63.5071	-57.0068				95	-63.5071	-57.0068
95.05	-63.446	-56.8848								95.05	-63.446	-56.8848				95.05	-63.446	-56.8848
95.1	-63.2935	-57.0984								95.1	-63.2935	-57.0984				95.1	-63.2935	-57.0984
95.15	-63.1409	-57.0068								95.15	-63.1409	-57.0068				95.15	-63.1409	-57.0068
95.2	-63.2629	-56.8542								95.2	-63.2629	-56.8542				95.2	-63.2629	-56.8542
95.25	-63.446	-57.0374								95.25	-63.446	-57.0374				95.25	-63.446	-57.0374
95.3	-63.4155	-57.0984								95.3	-63.4155	-57.0984				95.3	-63.4155	-57.0984
95.35	-63.324	-57.0068								95.35	-63.324	-57.0068				95.35	-63.324	-57.0068
95.4	-63.385	-56.9153								95.4	-63.385	-56.9153				95.4	-63.385	-56.9153
95.45	-63.324	-57.1899								95.45	-63.324	-57.1899				95.45	-63.324	-57.1899
95.5	-63.2324	-57.1899								95.5	-63.2324	-57.1899				95.5	-63.2324	-57.1899
95.55	-63.3545	-56.8542								95.55	-63.3545	-56.8542				95.55	-63.3545	-56.8542
95.6	-63.446	-57.251								95.6	-63.446	-57.251				95.6	-63.446	-57.251
95.65	-63.4766	-57.0374								95.65	-63.4766	-57.0374				95.65	-63.4766	-57.0374
95.7	-63.385	-57.0679								95.7	-63.385	-57.0679				95.7	-63.385	-57.0679
95.75	-63.3545	-57.0984								95.75	-63.3545	-57.0984				95.75	-63.3545	-57.0984
95.8	-63.2324	-57.1899								95.8	-63.2324	-57.1899				95.8	-63.2324	-57.1899
95.85	-63.2324	-57.1594								95.85	-63.2324	-57.1594				95.85	-63.2324	-57.1594
95.9	-63.3545	-56.9763								95.9	-63.3545	-56.9763				95.9	-63.3545	-56.9763
95.95	-63.4766	-57.2815								95.95	-63.4766	-57.2815				95.95	-63.4766	-57.2815
96	-63.446	-57.1289								96	-63.446	-57.1289				96	-63.446	-57.1289
96.05	-63.446	-57.0068								96.05	-63.446	-57.0068				96.05	-63.446	-57.0068
96.1	-63.4766	-57.0679								96.1	-63.4766	-57.0679				96.1	-63.4766	-57.0679
96.15	-63.2019	-57.2815								96.15	-63.2019	-57.2815				96.15	-63.2019	-57.2815
96.2	-63.1103	-57.2205								96.2	-63.1103	-57.2205				96.2	-63.1103	-57.2205
96.25	-63.385	-56.9458								96.25	-63.385	-56.9458				96.25	-63.385	-56.9458
96.3	-63.4155	-57.1289								96.3	-63.4155	-57.1289				96.3	-63.4155	-57.1289
96.35	-63.385	-57.1594								96.35	-63.385	-57.1594				96.35	-63.385	-57.1594
96.4	-63.2629	-57.1289								96.4	-63.2629	-57.1289				96.4	-63.2629	-57.1289
96.45	-63.1103	-56.8237								96.45	-63.1103	-56.8237				96.45	-63.1103	-56.8237
96.5	-63.4766	-57.1899								96.5	-63.4766	-57.1899				96.5	-63.4766	-57.1899
96.55	-63.4155	-57.0984								96.55	-63.4155	-57.0984				96.55	-63.4155	-57.0984
96.6	-63.1409	-57.0984								96.6	-63.1409	-57.0984				96.6	-63.1409	-57.0984
96.65	-63.2935	-56.9763								96.65	-63.2935	-56.9763				96.65	-63.2935	-56.9763
96.7	-63.385	-57.2205								96.7	-63.385	-57.2205				96.7	-63.385	-57.2205
96.75	-63.2935	-57.1899								96.75	-63.2935	-57.1899				96.75	-63.2935	-57.1899
96.8	-63.3545	-57.0984								96.8	-63.3545	-57.0984				96.8	-63.3545	-57.0984
96.85	-63.2935	-57.0374								96.85	-63.2935	-57.0374				96.85	-63.2935	-57.0374
96.9	-63.2629	-57.251								96.9	-63.2629	-57.251				96.9	-63.2629	-57.251
96.95	-63.446	-57.2205								96.95	-63.446	-57.2205				96.95	-63.446	-57.2205
97	-63.385	-57.1289								97	-63.385	-57.1289				97	-63.385	-57.1289
97.05	-63.1714	-57.0068								97.05	-63.1714	-57.0068				97.05	-63.1714	-57.0068
97.1	-63.5071	-57.2205								97.1	-63.5071	-57.2205				97.1	-63.5071	-57.2205
97.15	-63.324	-57.2205								97.15	-63.324	-57.2205				97.15	-63.324	-57.2205
97.2	-63.385	-57.1899								97.2	-63.385	-57.1899				97.2	-63.385	-57.1899
97.25	-63.446	-56.9763								97.25	-63.446	-56.9763				97.25	-63.446	-56.9763
97.3	-63.2019	-57.2205								97.3	-63.2019	-57.2205				97.3	-63.2019	-57.2205
97.35	-63.5071	-57.2205								97.35	-63.5071	-57.2205				97.35	-63.5071	-57.2205
97.4	-63.2935	-57.0984								97.4	-63.2935	-57.0984				97.4	-63.2935	-57.0984
97.45	-63.4766	-57.0068								97.45	-63.4766	-57.0068				97.45	-63.4766	-57.0068
97.5	-63.3545	-57.2205								97.5	-63.3545	-57.2205				97.5	-63.3545	-57.2205
97.55	-63.1714	-57.3425								97.55	-63.1714	-57.3425				97.55	-63.1714	-57.3425
97.6	-63.446	-57.2815								97.6	-63.446	-57.2815				97.6	-63.446	-57.2815
97.65	-63.1103	-57.1289								97.65	-63.1103	-57.1289				97.65	-63.1103	-57.1289
97.7	-63.446	-57.1594								97.7	-63.446	-57.1594				97.7	-63.446	-57.1594
97.75	-63.446	-57.3425								97.75	-63.446	-57.3425				97.75	-63.446	-57.3425
97.8	-63.1409	-57.373								97.8	-63.1409	-57.373				97.8	-63.1409	-57.373
97.85	-63.446	-57.2205								97.85	-63.446	-57.2205				97.85	-63.446	-57.2205
97.9	-63.324	-57.1899								97.9	-63.324	-57.1899				97.9	-63.324	-57.1899
97.95	-63.4155	-57.3425								97.95	-63.4155	-57.3425				97.95	-63.4155	-57.3425
98	-63.446	-57.4646								98	-63.446	-57.4646				98	-63.446	-57.4646
98.05	-63.3545	-57.3425								98.05	-63.3545	-57.3425				98.05	-63.3545	-57.3425
98.1	-63.4766	-57.1899								98.1	-63.4766	-57.1899				98.1	-63.4766	-57.1899
98.15	-63.4155	-57.251								98.15	-63.4155	-57.251				98.15	-63.4155	-57.251
98.2	-63.2324	-57.5561								98.2	-63.2324	-57.5561				98.2	-63.2324	-57.5561
98.25	-63.446	-57.4036								98.25	-63.446	-57.4036				98.25	-63.446	-57.4036
98.3	-63.385	-57.3425								98.3	-63.385	-57.3425				98.3	-63.385	-57.3425
98.35	-63.2935	-57.2205								98.35	-63.2935	-57.2205				98.35	-63.2935	-57.2205
98.4	-63.446	-57.373								98.4	-63.446	-57.373				98.4	-63.446	-57.373
98.45	-63.385	-57.6172								98.45	-63.385	-57.6172				98.45	-63.385	-57.6172
98.5	-63.2019	-57.4036								98.5	-63.2019	-57.4036				98.5	-63.2019	-57.4036
98.55	-63.5376	-57.373								98.55	-63.5376	-57.373				98.55	-63.5376	-57.373
98.6	-63.4155	-57.251								98.6	-63.4155	-57.251				98.6	-63.4155	-57.251
98.65	-63.3545	-57.373								98.65	-63.3545	-57.373				98.65	-63.3545	-57.373
98.7	-63.3545	-57.6172								98.7	-63.3545	-57.6172				98.7	-63.3545	-57.6172
98.75	-63.446	-57.4951								98.75	-63.446	-57.4951				98.75	-63.446	-57.4951
98.8	-63.385	-57.4341								98.8	-63.385	-57.4341				98.8	-63.385	-57.4341
98.85	-63.2935	-57.2815								98.85	-63.2935	-57.2815				98.85	-63.2935	-57.2815
98.9	-63.5681	-57.4036								98.9	-63.5681	-57.4036				98.9	-63.5681	-57.4036
98.95	-63.4155	-57.5867								98.95	-63.4155	-57.5867				98.95	-63.4155	-57.5867
99	-63.2629	-57.4951								99	-63.2629	-57.4951				99	-63.2629	-57.4951
99.05	-63.5986	-57.5561								99.05	-63.5986	-57.5561				99.05	-63.5986	-57.5561
99.1	-63.446	-57.4036								99.1	-63.446	-57.4036				99.1	-63.446	-57.4036
99.15	-63.324	-57.2815								99.15	-63.324	-57.2815				99.15	-63.324	-57.2815
99.2	-63.4766	-57.5867								99.2	-63.4766	-57.5867				99.2	-63.4766	-57.5867
99.25	-63.4766	-57.7087								99.25	-63.4766	-57.7087				99.25	-63.4766	-57.7087
99.3	-63.3545	-57.5867								99.3	-63.3545	-57.5867				99.3	-63.3545	-57.5867
99.35	-63.2629	-57.5561								99.35	-63.2629	-57.5561				99.35	-63.2629	-57.5561
99.4	-63.5986	-57.4036								99.4	-63.5986	-57.4036				99.4	-63.5986	-57.4036
99.45	-63.5071	-57.4646								99.45	-63.5071	-57.4646				99.45	-63.5071	-57.4646
99.5	-63.2324	-57.7087								99.5	-63.2324	-57.7087				99.5	-63.2324	-57.7087
99.55	-63.5071	-57.6477								99.55	-63.5071	-57.6477				99.55	-63.5071	-57.6477
99.6	-63.446	-57.6172								99.6	-63.446	-57.6172				99.6	-63.446	-57.6172
99.65	-63.385	-57.5867								99.65	-63.385	-57.5867				99.65	-63.385	-57.5867
99.7	-63.2629	-57.4341								99.7	-63.2629	-57.4341				99.7	-63.2629	-57.4341
99.75	-63.5071	-57.4036								99.75	-63.5071	-57.4036				99.75	-63.5071	-57.4036
99.8	-63.446	-57.6477								99.8	-63.446	-57.6477				99.8	-63.446	-57.6477
[truncated: 63,536 more rows]
