# Supplementary material for: Intrinsic mechanical sensitivity of mammalian auditory neurons as a contributor to sound-driven neural activity
Source: eLife. 2022 Mar 10;11:e74948. doi: 10.7554/eLife.74948 (PMC8942473; doi:10.7554/eLife.74948)
Supplement: Figure 2—source data 1. [file elife-74948-fig2-data1.xlsx]

## Sheet: Figure 2b upper panel
Time	MP (mV)	Upper panel			Time	AP (mV)	Lower panel				Sinewave stimulation of SGNs using either displacement before/ displacement overlap with current and vice versa)
0	-55.535				0	-67.2084
0.05	-55.304				0.05	-67.7156
0.1	-54.9017				0.1	-67.9474					Figure 2.
0.15	-54.7932				0.15	-67.9671					Mechanical stimulation of SGN cell-body increased sensitivity to current injection and affected phase locking. a,
0.2	-55.1668				0.2	-67.9303
0.25	-55.3483				0.25	-67.7121
0.3	-54.9093				0.3	-67.5711
0.35	-54.6877				0.35	-67.5304
0.4	-54.9722				0.4	-67.3446
0.45	-55.0095				0.45	-67.5337
0.5	-54.556				0.5	-67.9277
0.55	-54.1971				0.55	-68.0006
0.6	-54.5254				0.6	-68.0018
0.65	-55.1284				0.65	-67.8074
0.7	-55.1869				0.7	-67.4814
0.75	-54.7787				0.75	-67.5209
0.8	-54.7				0.8	-67.4337
0.85	-55.1855				0.85	-67.165
0.9	-55.4622				0.9	-67.4885
0.95	-54.9951				0.95	-67.7322
1	-54.5339				1	-67.5091
1.05	-54.7484				1.05	-67.6426
1.1	-55.1011				1.1	-67.7965
1.15	-54.8693				1.15	-67.5905
1.2	-54.3378				1.2	-67.6748
1.25	-54.4298				1.25	-67.7897
1.3	-55.0265				1.3	-67.5183
1.35	-55.2113				1.35	-67.4533
1.4	-54.8863				1.4	-67.5715
1.45	-54.8815				1.45	-67.4342
1.5	-55.2767				1.5	-67.3891
1.55	-55.1893				1.55	-67.4011
1.6	-54.7074				1.6	-67.2724
1.65	-54.7003				1.65	-67.3983
1.7	-54.9333				1.7	-67.6476
1.75	-54.9584				1.75	-67.3431
1.8	-55.0554				1.8	-66.9687
1.85	-54.9867				1.85	-67.2707
1.9	-54.6428				1.9	-67.4707
1.95	-54.7044				1.95	-67.3715
2	-54.9895				2	-67.6202
2.05	-55.0689				2.05	-67.5711
2.1	-54.9876				2.1	-67.039
2.15	-54.9002				2.15	-67.1183
2.2	-54.9397				2.2	-67.6971
2.25	-54.953				2.25	-67.6766
2.3	-55.0479				2.3	-67.2408
2.35	-55.1395				2.35	-67.4079
2.4	-55.1833				2.4	-67.6799
2.45	-55.0262				2.45	-67.2775
2.5	-54.7094				2.5	-67.1131
2.55	-54.677				2.55	-67.5177
2.6	-54.6574				2.6	-67.5855
2.65	-54.5257				2.65	-67.3418
2.7	-54.363				2.7	-67.5061
2.75	-54.403				2.75	-67.703
2.8	-54.6744				2.8	-67.4757
2.85	-55.0802				2.85	-67.4615
2.9	-55.2426				2.9	-67.8238
2.95	-55.1648				2.95	-67.7751
3	-55.1066				3	-67.3574
3.05	-55.1173				3.05	-67.4497
3.1	-55.1001				3.1	-67.8333
3.15	-54.9147				3.15	-67.7159
3.2	-54.8641				3.2	-67.3956
3.25	-54.8766				3.25	-67.7048
3.3	-54.8712				3.3	-67.9764
3.35	-54.8392				3.35	-67.5184
3.4	-54.9509				3.4	-67.2873
3.45	-55.1113				3.45	-67.5678
3.5	-54.9929				3.5	-67.6215
3.55	-54.856				3.55	-67.4716
3.6	-54.8132				3.6	-67.4786
3.65	-54.984				3.65	-67.4618
3.7	-55.029				3.7	-67.5958
3.75	-54.8486				3.75	-67.6117
3.8	-54.955				3.8	-67.3071
3.85	-54.9619				3.85	-67.3817
3.9	-54.8487				3.9	-67.5925
3.95	-54.9334				3.95	-67.6325
4	-54.9198				4	-67.5943
4.05	-54.9592				4.05	-67.5024
4.1	-54.8176				4.1	-67.5785
4.15	-54.5422				4.15	-67.6823
4.2	-54.83				4.2	-67.7447
4.25	-55.0922				4.25	-67.6589
4.3	-55.0957				4.3	-67.4683
4.35	-55.216				4.35	-67.2341
4.4	-55.0626				4.4	-67.1726
4.45	-54.9422				4.45	-67.3894
4.5	-55.1958				4.5	-67.6951
4.55	-55.2898				4.55	-67.7054
4.6	-55.2743				4.6	-67.5643
4.65	-55.0481				4.65	-67.6233
4.7	-54.6994				4.7	-67.6651
4.75	-54.9088				4.75	-67.5296
4.8	-55.0628				4.8	-67.4591
4.85	-54.8408				4.85	-67.6053
4.9	-54.9516				4.9	-67.7344
4.95	-54.9487				4.95	-67.8076
5	-54.7427				5	-67.9749
5.05	-54.8998				5.05	-68.0734
5.1	-54.9861				5.1	-68.0226
5.15	-54.8479				5.15	-68.1017
5.2	-54.7644				5.2	-68.2694
5.25	-54.6474				5.25	-68.2357
5.3	-54.6324				5.3	-67.993
5.35	-54.7621				5.35	-67.8291
5.4	-54.7576				5.4	-67.7134
5.45	-54.8729				5.45	-67.5854
5.5	-55.1141				5.5	-67.262
5.55	-55.0208				5.55	-67.1115
5.6	-54.91				5.6	-67.2548
5.65	-54.8548				5.65	-67.4823
5.7	-54.5614				5.7	-67.7022
5.75	-54.4434				5.75	-67.8106
5.8	-54.572				5.8	-67.6526
5.85	-54.6311				5.85	-67.3295
5.9	-54.6936				5.9	-67.4862
5.95	-54.7028				5.95	-67.7944
6	-54.4098				6	-67.7612
6.05	-54.1679				6.05	-67.5962
6.1	-54.1979				6.1	-67.4888
6.15	-54.1894				6.15	-67.5336
6.2	-54.2801				6.2	-67.5489
6.25	-54.4852				6.25	-67.5201
6.3	-54.3031				6.3	-67.4129
6.35	-54.0577				6.35	-67.3021
6.4	-54.3384				6.4	-67.2443
6.45	-54.5224				6.45	-67.1576
6.5	-54.4085				6.5	-67.4152
6.55	-54.5408				6.55	-67.798
6.6	-54.4276				6.6	-67.8339
6.65	-53.9093				6.65	-67.7325
6.7	-53.9317				6.7	-67.6827
6.75	-54.2571				6.75	-67.8214
6.8	-54.1693				6.8	-67.8783
6.85	-54.1839				6.85	-67.6921
6.9	-54.4417				6.9	-67.5237
6.95	-54.4073				6.95	-67.3424
7	-54.315				7	-67.3521
7.05	-54.5283				7.05	-67.5406
7.1	-54.5197				7.1	-67.6766
7.15	-54.2108				7.15	-67.5497
7.2	-54.3201				7.2	-67.2051
7.25	-54.5815				7.25	-67.1981
7.3	-54.3738				7.3	-67.2359
7.35	-54.1083				7.35	-67.0089
7.4	-54.0843				7.4	-67.183
7.45	-53.9338				7.45	-67.5107
7.5	-53.8091				7.5	-67.5321
7.55	-54.2546				7.55	-67.4449
7.6	-54.7338				7.6	-67.4929
7.65	-54.5848				7.65	-67.8897
7.7	-54.3441				7.7	-68.0603
7.75	-54.4768				7.75	-67.8121
7.8	-54.4291				7.8	-67.7435
7.85	-54.0216				7.85	-67.7824
7.9	-53.896				7.9	-67.7852
7.95	-54.1109				7.95	-67.626
8	-54.0751				8	-67.4054
8.05	-53.8375				8.05	-67.5781
8.1	-53.9635				8.1	-67.5647
8.15	-54.2914				8.15	-67.2725
8.2	-54.2611				8.2	-67.4066
8.25	-54.0477				8.25	-67.6573
8.3	-54.1657				8.3	-67.8398
8.35	-54.411				8.35	-68.0083
8.4	-54.2119				8.4	-67.934
8.45	-53.7969				8.45	-67.8537
8.5	-53.9426				8.5	-67.6052
8.55	-54.3616				8.55	-67.3009
8.6	-54.215				8.6	-67.4607
8.65	-53.9727				8.65	-67.489
8.7	-54.4316				8.7	-67.1445
8.75	-54.952				8.75	-67.2493
8.8	-54.6374				8.8	-67.4942
8.85	-54.005				8.85	-67.393
8.9	-54.1711				8.9	-67.5085
8.95	-54.7513				8.95	-67.6685
9	-54.5531				9	-67.6021
9.05	-53.7529				9.05	-67.7415
9.1	-53.6211				9.1	-67.8354
9.15	-54.3534				9.15	-67.8164
9.2	-54.827				9.2	-67.9878
9.25	-54.5258				9.25	-68.0408
9.3	-54.3078				9.3	-68.0209
9.35	-54.7017				9.35	-68.1205
9.4	-54.8688				9.4	-67.9119
9.45	-54.3294				9.45	-67.5932
9.5	-53.8119				9.5	-67.7369
9.55	-53.9703				9.55	-67.8556
9.6	-54.4289				9.6	-67.6818
9.65	-54.565				9.65	-67.8054
9.7	-54.2416				9.7	-67.8364
9.75	-54.1395				9.75	-67.5479
9.8	-54.6445				9.8	-67.5885
9.85	-54.982				9.85	-67.5946
9.9	-54.7061				9.9	-67.4016
9.95	-54.512				9.95	-67.5642
10	-54.6251				10	-67.6409
10.05	-54.5152				10.05	-67.4521
10.1	-54.3631				10.1	-67.6203
10.15	-54.3849				10.15	-67.848
10.2	-54.2663				10.2	-67.6244
10.25	-54.2048				10.25	-67.4612
10.3	-54.2506				10.3	-67.6201
10.35	-54.281				10.35	-67.3301
10.4	-54.3768				10.4	-66.8907
10.45	-54.3812				10.45	-67.2009
10.5	-54.3967				10.5	-67.3676
10.55	-54.4714				10.55	-66.9971
10.6	-54.5788				10.6	-67.1983
10.65	-54.6091				10.65	-67.6531
10.7	-54.3668				10.7	-67.4966
10.75	-54.0917				10.75	-67.319
10.8	-53.9193				10.8	-67.6712
10.85	-54.1087				10.85	-67.8683
10.9	-54.5336				10.9	-67.6312
10.95	-54.848				10.95	-67.7104
11	-54.8497				11	-68.1087
11.05	-54.6084				11.05	-68.0548
11.1	-54.5122				11.1	-67.6572
11.15	-54.6107				11.15	-67.5452
11.2	-54.5451				11.2	-67.4405
11.25	-54.378				11.25	-67.1506
11.3	-54.4223				11.3	-67.3284
11.35	-54.3473				11.35	-67.8087
11.4	-54.2961				11.4	-67.7204
11.45	-54.486				11.45	-67.2784
11.5	-54.753				11.5	-67.4271
11.55	-54.7557				11.55	-67.7631
11.6	-54.5936				11.6	-67.6561
11.65	-54.51				11.65	-67.5791
11.7	-54.394				11.7	-67.6074
11.75	-54.2317				11.75	-67.4333
11.8	-54.1597				11.8	-67.4108
11.85	-54.4468				11.85	-67.5725
11.9	-54.5525				11.9	-67.451
11.95	-54.5306				11.95	-67.2823
12	-54.9007				12	-67.4935
12.05	-55.0702				12.05	-67.7063
12.1	-54.9138				12.1	-67.8765
12.15	-54.5793				12.15	-67.9684
12.2	-54.3104				12.2	-67.7859
12.25	-54.4958				12.25	-67.8121
12.3	-54.477				12.3	-68.0133
12.35	-54.276				12.35	-68.0847
12.4	-54.3073				12.4	-67.9367
12.45	-54.2507				12.45	-67.6276
12.5	-54.3458				12.5	-67.4713
12.55	-54.503				12.55	-67.5215
12.6	-54.4725				12.6	-67.4924
12.65	-54.5652				12.65	-67.0891
12.7	-54.3665				12.7	-66.8341
12.75	-54.0066				12.75	-66.9915
12.8	-54.1853				12.8	-67.1777
12.85	-54.3068				12.85	-67.1149
12.9	-54.2275				12.9	-67.1695
12.95	-54.2858				12.95	-67.2917
13	-54.2282				13	-67.3007
13.05	-54.446				13.05	-67.3588
13.1	-54.8753				13.1	-67.5994
13.15	-54.9682				13.15	-67.7483
13.2	-54.9497				13.2	-67.694
13.25	-54.5861				13.25	-67.5612
13.3	-54.0671				13.3	-67.5385
13.35	-54.1775				13.35	-67.4426
13.4	-54.2127				13.4	-67.2282
13.45	-54.0155				13.45	-67.2531
13.5	-54.2945				13.5	-67.661
13.55	-54.3836				13.55	-67.901
13.6	-54.0682				13.6	-67.9127
13.65	-54.1036				13.65	-67.9344
13.7	-54.1377				13.7	-67.9589
13.75	-53.9749				13.75	-68.023
13.8	-53.9478				13.8	-68.0619
13.85	-53.9146				13.85	-68.0335
13.9	-53.9076				13.9	-67.8514
13.95	-53.972				13.95	-67.646
14	-53.9343				14	-67.5167
14.05	-53.9246				14.05	-67.6883
14.1	-54.0177				14.1	-67.7982
14.15	-54.0065				14.15	-67.5645
14.2	-54.1685				14.2	-67.4001
14.25	-54.5207				14.25	-67.3982
14.3	-54.3943				14.3	-67.5473
14.35	-54.0504				14.35	-67.6853
14.4	-54.0803				14.4	-67.7261
14.45	-54.1117				14.45	-67.6014
14.5	-54.0399				14.5	-67.2932
14.55	-54.2235				14.55	-67.1842
14.6	-54.3348				14.6	-67.2952
14.65	-54.3204				14.65	-67.5785
14.7	-54.4748				14.7	-67.6127
14.75	-54.456				14.75	-67.3501
14.8	-54.2663				14.8	-67.2666
14.85	-54.3978				14.85	-67.1637
14.9	-54.3358				14.9	-67.1814
14.95	-53.9556				14.95	-67.303
15	-54.0362				15	-67.2873
15.05	-54.2145				15.05	-67.2544
15.1	-54.0016				15.1	-67.1487
15.15	-53.9761				15.15	-67.2411
15.2	-54.1426				15.2	-67.4377
15.25	-54.0589				15.25	-67.4873
15.3	-54.1072				15.3	-67.6179
15.35	-54.493				15.35	-67.7323
15.4	-54.4444				15.4	-67.8073
15.45	-53.9298				15.45	-67.6378
15.5	-53.8744				15.5	-67.4083
15.55	-54.1376				15.55	-67.601
15.6	-54.0321				15.6	-67.7034
15.65	-53.9941				15.65	-67.6481
15.7	-54.3547				15.7	-67.6171
15.75	-54.3557				15.75	-67.3811
15.8	-54.0029				15.8	-67.3116
15.85	-54.0948				15.85	-67.3747
15.9	-54.3433				15.9	-67.4705
15.95	-54.0994				15.95	-67.7322
16	-53.7801				16	-67.8553
16.05	-53.9271				16.05	-68.0109
16.1	-54.0016				16.1	-68.063
16.15	-53.7063				16.15	-67.754
16.2	-53.8117				16.2	-67.6588
16.25	-54.2944				16.25	-67.6504
16.3	-54.1824				16.3	-67.5957
16.35	-53.6782				16.35	-67.6471
16.4	-53.8503				16.4	-67.5766
16.45	-54.2802				16.45	-67.7129
16.5	-54.0168				16.5	-67.7781
16.55	-53.6605				16.55	-67.4375
16.6	-53.9454				16.6	-67.4082
16.65	-54.1675				16.65	-67.537
16.7	-53.759				16.7	-67.4892
16.75	-53.6159				16.75	-67.6137
16.8	-54.2193				16.8	-67.7315
16.85	-54.5608				16.85	-67.7772
16.9	-54.099				16.9	-67.8589
16.95	-53.8037				16.95	-67.8624
17	-54.3078				17	-67.9162
17.05	-54.6008				17.05	-67.8411
17.1	-54.1391				17.1	-67.3904
17.15	-53.7526				17.15	-67.131
17.2	-54.016				17.2	-67.2117
17.25	-54.3511				17.25	-67.3624
17.3	-54.1451				17.3	-67.6228
17.35	-53.7882				17.35	-67.7258
17.4	-53.8534				17.4	-67.6723
17.45	-54.0973				17.45	-67.925
17.5	-54.0052				17.5	-67.9957
17.55	-53.6722				17.55	-67.6088
17.6	-53.6264				17.6	-67.5276
17.65	-54.0296				17.65	-67.5268
17.7	-54.3318				17.7	-67.285
17.75	-54.0653				17.75	-67.5062
17.8	-53.8011				17.8	-67.8609
17.85	-54.142				17.85	-67.6949
17.9	-54.6185				17.9	-67.6248
17.95	-54.5557				17.95	-67.7499
18	-54.0399				18	-67.6876
18.05	-53.9858				18.05	-67.7671
18.1	-54.3697				18.1	-67.8813
18.15	-54.2284				18.15	-67.7152
18.2	-53.8765				18.2	-67.6439
18.25	-54.1401				18.25	-67.79
18.3	-54.4704				18.3	-67.7575
18.35	-54.4121				18.35	-67.6879
18.4	-54.4258				18.4	-67.8415
18.45	-54.5076				18.45	-67.7693
18.5	-54.371				18.5	-67.6224
18.55	-54.2747				18.55	-67.9474
18.6	-54.1591				18.6	-68.0224
18.65	-54.0328				18.65	-67.5775
18.7	-54.2231				18.7	-67.5759
18.75	-54.4779				18.75	-67.9198
18.8	-54.5871				18.8	-67.6854
18.85	-54.3666				18.85	-67.2744
18.9	-53.9873				18.9	-67.4199
18.95	-53.8516				18.95	-67.5442
19	-53.8044				19	-67.3814
19.05	-53.8518				19.05	-67.6046
19.1	-53.8473				19.1	-67.9713
19.15	-54.0295				19.15	-67.8038
19.2	-54.3692				19.2	-67.5244
19.25	-54.5123				19.25	-67.7315
19.3	-54.6189				19.3	-67.8778
19.35	-54.8178				19.35	-67.6221
19.4	-54.8934				19.4	-67.6476
19.45	-54.7716				19.45	-67.8934
19.5	-54.646				19.5	-67.7709
19.55	-54.4428				19.55	-67.615
19.6	-54.2006				19.6	-67.8589
19.65	-53.8162				19.65	-67.956
19.7	-53.6206				19.7	-67.6194
19.75	-53.8488				19.75	-67.5087
19.8	-54.1698				19.8	-67.8884
19.85	-54.2895				19.85	-67.9667
19.9	-54.2954				19.9	-67.6219
19.95	-54.1491				19.95	-67.6502
20	-53.9152				20	-67.8233
20.05	-53.9411				20.05	-67.6581
20.1	-54.0697				20.1	-67.6065
20.15	-54.191				20.15	-67.8326
20.2	-54.1419				20.2	-67.8355
20.25	-54.0609				20.25	-67.7328
20.3	-54.0346				20.3	-67.698
20.35	-53.8406				20.35	-67.5132
20.4	-53.9945				20.4	-67.5978
20.45	-54.2842				20.45	-67.8151
20.5	-54.2905				20.5	-67.5882
20.55	-54.4514				20.55	-67.2394
20.6	-54.663				20.6	-67.1615
20.65	-54.7963				20.65	-67.4743
20.7	-54.6262				20.7	-67.7038
20.75	-54.0859				20.75	-67.7706
20.8	-53.9786				20.8	-67.8552
20.85	-54.0151				20.85	-67.7922
20.9	-53.7909				20.9	-67.7261
20.95	-53.9999				20.95	-67.6506
21	-54.2456				21	-67.62
21.05	-54.0904				21.05	-67.5225
21.1	-53.984				21.1	-67.429
21.15	-53.96				21.15	-67.4841
21.2	-54.1338				21.2	-67.6674
21.25	-54.2201				21.25	-67.6231
21.3	-53.9096				21.3	-67.4338
21.35	-53.8809				21.35	-67.3601
21.4	-54.0481				21.4	-67.3753
21.45	-53.975				21.45	-67.3523
21.5	-54.1425				21.5	-67.3721
21.55	-54.3273				21.55	-67.4197
21.6	-54.2877				21.6	-67.3776
21.65	-54.4735				21.65	-67.3088
21.7	-54.509				21.7	-67.4804
21.75	-54.4421				21.75	-67.7694
21.8	-54.5768				21.8	-67.8709
21.85	-54.3617				21.85	-67.7124
21.9	-54.0069				21.9	-67.6287
21.95	-53.986				21.95	-67.6819
22	-53.9924				22	-67.6709
22.05	-54.1232				22.05	-67.5738
22.1	-54.2787				22.1	-67.3662
22.15	-54.1048				22.15	-67.3704
22.2	-54.0366				22.2	-67.5082
22.25	-54.0725				22.25	-67.8372
22.3	-54.1055				22.3	-68.0502
22.35	-54.3373				22.35	-67.901
22.4	-54.2799				22.4	-67.6179
22.45	-54.0352				22.45	-67.4306
22.5	-54.2583				22.5	-67.4299
22.55	-54.4705				22.55	-67.4072
22.6	-54.3518				22.6	-67.5138
22.65	-54.5895				22.65	-67.6638
22.7	-54.87				22.7	-67.6699
22.75	-54.5589				22.75	-67.3831
22.8	-54.2921				22.8	-66.8841
22.85	-54.2174				22.85	-66.9413
22.9	-53.9201				22.9	-67.4489
22.95	-53.892				22.95	-67.8258
23	-54.1839				23	-67.9147
23.05	-54.3038				23.05	-67.7739
23.1	-54.4637				23.1	-67.672
23.15	-54.9165				23.15	-67.5522
23.2	-54.9994				23.2	-67.5528
23.25	-54.6269				23.25	-67.6269
23.3	-54.533				23.3	-67.4995
23.35	-54.5005				23.35	-67.5126
23.4	-54.3097				23.4	-67.7271
23.45	-54.4247				23.45	-67.9202
23.5	-54.498				23.5	-67.7584
23.55	-54.236				23.55	-67.3402
23.6	-54.1923				23.6	-67.3782
23.65	-54.3506				23.65	-67.5595
23.7	-54.3155				23.7	-67.5325
23.75	-54.3065				23.75	-67.4829
23.8	-54.467				23.8	-67.3473
23.85	-54.3161				23.85	-67.3449
23.9	-53.9909				23.9	-67.4064
23.95	-54.0625				23.95	-67.4978
24	-54.0189				24	-67.6452
24.05	-53.6281				24.05	-67.5002
24.1	-53.6307				24.1	-67.4701
24.15	-54.0252				24.15	-67.6349
24.2	-54.0389				24.2	-67.627
24.25	-53.792				24.25	-67.6314
24.3	-53.9957				24.3	-67.5531
24.35	-54.1592				24.35	-67.5766
24.4	-53.729				24.4	-67.6786
24.45	-53.6327				24.45	-67.4757
24.5	-54.2307				24.5	-67.5414
24.55	-54.2722				24.55	-67.6679
24.6	-53.6689				24.6	-67.4654
24.65	-53.6149				24.65	-67.4848
24.7	-54.0949				24.7	-67.5381
24.75	-54.1783				24.75	-67.4352
24.8	-53.8359				24.8	-67.2891
24.85	-53.9434				24.85	-67.0848
24.9	-54.3056				24.9	-67.3273
24.95	-54.1311				24.95	-67.6541
25	-53.8056				25	-67.4805
25.05	-54.0109				25.05	-67.4237
25.1	-54.2366				25.1	-67.5292
25.15	-53.8955				25.15	-67.5712
25.2	-53.5386				25.2	-67.7086
25.25	-53.8519				25.25	-67.4556
25.3	-54.3282				25.3	-66.9868
25.35	-54.238				25.35	-67.1422
25.4	-53.9026				25.4	-67.4909
25.45	-54.0491				25.45	-67.6783
25.5	-54.4351				25.5	-67.872
25.55	-54.4123				25.55	-67.7237
25.6	-54.037				25.6	-67.512
25.65	-53.9383				25.65	-67.7658
25.7	-54.4094				25.7	-67.9313
25.75	-54.7938				25.75	-67.8504
25.8	-54.5184				25.8	-67.8773
25.85	-54.3279				25.85	-67.8575
25.9	-54.6697				25.9	-67.8531
25.95	-54.8637				25.95	-67.9731
26	-54.4343				26	-67.8213
26.05	-53.9164				26.05	-67.6299
26.1	-54.2177				26.1	-67.7868
26.15	-54.8777				26.15	-67.6453
26.2	-54.7758				26.2	-67.3242
26.25	-54.2892				26.25	-67.4605
26.3	-54.4061				26.3	-67.4262
26.35	-54.8616				26.35	-67.2978
26.4	-54.8612				26.4	-67.7073
26.45	-54.4208				26.45	-67.8866
26.5	-54.4382				26.5	-67.5298
26.55	-54.857				26.55	-67.4595
26.6	-54.6718				26.6	-67.5085
26.65	-54.2372				26.65	-67.3979
26.7	-54.4208				26.7	-67.6842
26.75	-54.4337				26.75	-67.9721
26.8	-54.1672				26.8	-67.6056
26.85	-54.3828				26.85	-67.2325
26.9	-54.4571				26.9	-67.2484
26.95	-54.2201				26.95	-67.1473
27	-54.2529				27	-67.0948
27.05	-54.3234				27.05	-67.5494
27.1	-54.446				27.1	-67.7529
27.15	-54.5665				27.15	-67.4477
27.2	-54.6215				27.2	-67.4861
27.25	-54.6292				27.25	-67.7525
27.3	-54.369				27.3	-67.6589
27.35	-54.3477				27.35	-67.4748
27.4	-54.5231				27.4	-67.6764
27.45	-54.5412				27.45	-67.6684
27.5	-54.5955				27.5	-67.2075
27.55	-54.8742				27.55	-67.261
27.6	-55.0802				27.6	-67.7945
27.65	-54.855				27.65	-67.8129
27.7	-54.395				27.7	-67.6052
27.75	-54.1008				27.75	-67.817
27.8	-54.177				27.8	-67.8352
27.85	-54.219				27.85	-67.3896
27.9	-54.1618				27.9	-67.3671
27.95	-54.0786				27.95	-67.708
28	-54.0372				28	-67.503
28.05	-53.9767				28.05	-67.1248
28.1	-54.056				28.1	-67.504
28.15	-54.2431				28.15	-68.0457
28.2	-54.3052				28.2	-67.887
28.25	-54.113				28.25	-67.4749
28.3	-53.8695				28.3	-67.5975
28.35	-53.901				28.35	-67.7858
28.4	-53.8902				28.4	-67.4594
28.45	-53.9557				28.45	-67.3535
28.5	-54.0267				28.5	-67.482
28.55	-53.8135				28.55	-67.2697
28.6	-53.6467				28.6	-67.2739
28.65	-53.639				28.65	-67.5524
28.7	-53.9233				28.7	-67.6427
28.75	-54.0495				28.75	-67.6442
28.8	-53.7566				28.8	-67.5491
28.85	-53.8527				28.85	-67.5498
28.9	-54.1124				28.9	-67.5863
28.95	-53.9835				28.95	-67.2849
29	-53.7323				29	-66.9378
29.05	-53.5047				29.05	-66.9816
29.1	-53.6073				29.1	-67.3536
29.15	-53.7497				29.15	-67.4662
29.2	-53.766				29.2	-67.57
29.25	-54.1425				29.25	-67.999
29.3	-54.2414				29.3	-68.2718
29.35	-53.8285				29.35	-68.1794
29.4	-53.7715				29.4	-67.9994
29.45	-53.9353				29.45	-67.9142
29.5	-53.937				29.5	-67.7858
29.55	-53.8917				29.55	-67.6921
29.6	-53.7482				29.6	-67.6749
29.65	-53.8346				29.65	-67.7433
29.7	-54.0143				29.7	-67.6594
29.75	-53.9488				29.75	-67.4126
29.8	-53.9329				29.8	-67.2798
29.85	-53.8019				29.85	-67.4532
29.9	-53.5029				29.9	-67.4546
29.95	-53.7102				29.95	-67.3488
30	-53.9999				30	-67.4422
30.05	-53.9507				30.05	-67.6114
30.1	-54.1736				30.1	-67.4772
30.15	-54.3124				30.15	-67.3473
30.2	-54.06				30.2	-67.4196
30.25	-54.0211				30.25	-67.4323
30.3	-53.9689				30.3	-67.2702
30.35	-53.8675				30.35	-67.4197
30.4	-54.0941				30.4	-67.845
30.45	-54.1962				30.45	-68.0797
30.5	-54.1551				30.5	-67.8567
30.55	-54.2376				30.55	-67.5435
30.6	-54.0557				30.6	-67.4306
30.65	-53.8883				30.65	-67.2758
30.7	-54.0674				30.7	-67.1408
30.75	-53.9758				30.75	-66.9823
30.8	-53.8004				30.8	-67.0406
30.85	-54.0688				30.85	-67.2605
30.9	-54.1734				30.9	-67.3843
30.95	-53.9917				30.95	-67.4204
31	-54.0527				31	-67.367
31.05	-54.0114				31.05	-67.4886
31.1	-53.8296				31.1	-67.6724
31.15	-53.8946				31.15	-67.8645
31.2	-53.8704				31.2	-67.8324
31.25	-53.7296				31.25	-67.4308
31.3	-53.9118				31.3	-67.4009
31.35	-53.9086				31.35	-67.6257
31.4	-53.7459				31.4	-67.6068
31.45	-53.9975				31.45	-67.3404
31.5	-53.9281				31.5	-67.0626
31.55	-53.4845				31.55	-66.9696
31.6	-53.6098				31.6	-66.9297
31.65	-53.8963				31.65	-67.2288
31.7	-53.7643				31.7	-67.5792
31.75	-53.7339				31.75	-67.5149
31.8	-54.0835				31.8	-67.5371
31.85	-54.1172				31.85	-67.6981
31.9	-53.8111				31.9	-67.9476
31.95	-53.9826				31.95	-68.0055
32	-54.2149				32	-67.7276
32.05	-53.7976				32.05	-67.7814
32.1	-53.5056				32.1	-67.9838
32.15	-53.7097				32.15	-67.9781
32.2	-53.6168				32.2	-67.6945
32.25	-53.4821				32.25	-67.2938
32.3	-53.8817				32.3	-67.2822
32.35	-53.994				32.35	-67.2776
32.4	-53.5153				32.4	-67.2241
32.45	-53.3163				32.45	-67.3046
32.5	-53.5267				32.5	-67.3237
32.55	-53.5694				32.55	-67.5279
32.6	-53.4737				32.6	-67.7165
32.65	-53.7577				32.65	-67.8615
32.7	-54.1108				32.7	-68.2295
32.75	-53.9581				32.75	-68.2529
32.8	-53.7883				32.8	-68.1077
32.85	-54.2208				32.85	-68.091
32.9	-54.4952				32.9	-67.7631
32.95	-53.9877				32.95	-67.4436
33	-53.5755				33	-67.2236
33.05	-53.8398				33.05	-67.2173
33.1	-54.0764				33.1	-67.5868
33.15	-53.9309				33.15	-67.6993
33.2	-54.164				33.2	-67.6398
33.25	-54.6868				33.25	-67.7176
33.3	-54.5018				33.3	-67.6793
33.35	-53.9048				33.35	-67.7875
33.4	-54.0011				33.4	-67.9342
33.45	-54.3831				33.45	-67.6846
33.5	-54.1747				33.5	-67.6587
33.55	-53.6339				33.55	-67.7722
33.6	-53.6594				33.6	-67.609
33.65	-54.0817				33.65	-67.6203
33.7	-53.8229				33.7	-67.5053
33.75	-53.2211				33.75	-67.2942
33.8	-53.5022				33.8	-67.5336
33.85	-54.2884				33.85	-67.6744
33.9	-54.4651				33.9	-67.5671
33.95	-54.1256				33.95	-67.7
34	-54.2195				34	-67.7452
34.05	-54.6556				34.05	-67.6632
34.1	-54.5347				34.1	-67.861
34.15	-53.8717				34.15	-67.8355
34.2	-53.514				34.2	-67.6025
34.25	-53.758				34.25	-67.83
34.3	-54.146				34.3	-68.1004
34.35	-54.0854				34.35	-68.1616
34.4	-53.5849				34.4	-68.2342
34.45	-53.6018				34.45	-67.831
34.5	-54.2765				34.5	-67.4651
34.55	-54.6577				34.55	-67.8133
34.6	-54.2667				34.6	-67.93
34.65	-53.6891				34.65	-67.59
34.7	-53.7567				34.7	-67.631
34.75	-54.0865				34.75	-67.7012
34.8	-53.94				34.8	-67.4999
34.85	-53.8505				34.85	-67.5791
34.9	-54.3018				34.9	-67.6862
34.95	-54.4595				34.95	-67.5133
35	-54.2144				35	-67.6983
35.05	-54.4352				35.05	-68.0659
35.1	-54.6641				35.1	-67.9624
35.15	-54.4352				35.15	-67.8126
35.2	-54.2984				35.2	-67.8656
35.25	-54.2288				35.25	-67.7311
35.3	-54.2295				35.3	-67.496
35.35	-54.3515				35.35	-67.4265
35.4	-54.3883				35.4	-67.2079
35.45	-54.4982				35.45	-67.0347
35.5	-54.4389				35.5	-67.4687
35.55	-54.2241				35.55	-67.8755
35.6	-54.116				35.6	-67.7318
35.65	-54.0391				35.65	-67.6662
35.7	-54.1807				35.7	-67.9589
35.75	-54.3145				35.75	-67.9823
35.8	-54.5234				35.8	-67.8709
35.85	-54.8273				35.85	-68.1324
35.9	-55.0182				35.9	-68.1703
35.95	-55.1086				35.95	-67.6613
36	-55.0978				36	-67.5571
36.05	-55.0189				36.05	-68.0385
36.1	-54.8401				36.1	-68.104
36.15	-54.7108				36.15	-67.6951
36.2	-54.6268				36.2	-67.692
36.25	-54.5986				36.25	-68.007
36.3	-54.42				36.3	-67.9134
36.35	-54.2388				36.35	-67.81
36.4	-54.2258				36.4	-68.2738
36.45	-54.3955				36.45	-68.5092
36.5	-54.511				36.5	-68.0625
36.55	-54.5667				36.55	-67.7589
36.6	-54.5605				36.6	-67.9646
36.65	-54.537				36.65	-67.8863
36.7	-54.7632				36.7	-67.4455
36.75	-54.8795				36.75	-67.588
36.8	-54.7287				36.8	-67.8957
36.85	-54.2736				36.85	-67.6152
36.9	-54.0073				36.9	-67.4294
36.95	-54.3788				36.95	-67.5266
37	-54.6432				37	-67.5581
37.05	-54.6579				37.05	-67.6163
37.1	-54.5223				37.1	-67.5234
37.15	-54.2209				37.15	-67.3678
37.2	-54.2877				37.2	-67.3799
37.25	-54.5369				37.25	-67.4305
37.3	-54.6846				37.3	-67.6679
37.35	-54.5768				37.35	-67.9422
37.4	-54.108				37.4	-68.0631
37.45	-53.9099				37.45	-67.9893
37.5	-54.0008				37.5	-67.9775
37.55	-54.0125				37.55	-68.106
37.6	-54.234				37.6	-67.9851
37.65	-54.3444				37.65	-67.7161
37.7	-54.2036				37.7	-67.6509
37.75	-54.2026				37.75	-67.7272
37.8	-54.2607				37.8	-67.4563
37.85	-54.3772				37.85	-67.1667
37.9	-54.404				37.9	-67.1926
37.95	-54.0492				37.95	-67.3298
38	-53.8898				38	-67.3199
38.05	-54.078				38.05	-67.2881
38.1	-54.2038				38.1	-67.3005
38.15	-54.4643				38.15	-67.435
38.2	-54.5838				38.2	-67.5914
38.25	-54.3702				38.25	-67.6941
38.3	-54.3969				38.3	-67.7122
38.35	-54.3841				38.35	-67.6659
38.4	-54.2429				38.4	-67.3948
38.45	-54.3992				38.45	-67.1473
38.5	-54.4308				38.5	-67.2394
38.55	-54.3555				38.55	-67.5126
38.6	-54.5122				38.6	-67.7617
38.65	-54.4857				38.65	-68.0239
38.7	-54.4193				38.7	-68.1418
38.75	-54.58				38.75	-68.0408
38.8	-54.5135				38.8	-67.9295
38.85	-54.3099				38.85	-67.7587
38.9	-54.3039				38.9	-67.5742
38.95	-54.2608				38.95	-67.4838
39	-54.1955				39	-67.8045
39.05	-54.308				39.05	-68.1668
39.1	-54.3965				39.1	-68.2307
39.15	-54.5451				39.15	-68.0459
39.2	-54.7596				39.2	-67.7633
39.25	-54.6544				39.25	-67.6644
39.3	-54.4922				39.3	-67.5631
39.35	-54.5487				39.35	-67.6049
39.4	-54.3905				39.4	-67.7131
39.45	-54.3361				39.45	-67.6883
39.5	-54.7505				39.5	-67.5914
39.55	-54.8712				39.55	-67.4878
39.6	-54.6946				39.6	-67.7522
39.65	-54.7586				39.65	-68.013
39.7	-54.6712				39.7	-68.1422
39.75	-54.5385				39.75	-68.2372
39.8	-54.7969				39.8	-68.0889
39.85	-54.7847				39.85	-67.9771
39.9	-54.4161				39.9	-67.8395
39.95	-54.5117				39.95	-67.7874
40	-54.7245				40	-67.7837
40.05	-54.4983				40.05	-67.48
40.1	-54.4131				40.1	-67.4121
40.15	-54.5671				40.15	-67.6703
40.2	-54.3824				40.2	-68.0209
40.25	-54.167				40.25	-68.1705
40.3	-54.572				40.3	-67.9691
40.35	-55.0119				40.35	-67.9824
40.4	-55.0549				40.4	-68.0961
40.45	-55.1305				40.45	-68.1052
40.5	-54.9112				40.5	-68.057
40.55	-54.4574				40.55	-67.8749
40.6	-54.6134				40.6	-67.8919
40.65	-55.0236				40.65	-67.8605
40.7	-54.8197				40.7	-67.757
40.75	-54.477				40.75	-67.8826
40.8	-54.7569				40.8	-67.8489
40.85	-55.072				40.85	-67.7482
40.9	-54.8735				40.9	-67.6751
40.95	-54.8301				40.95	-67.5795
41	-55.1604				41	-67.5837
41.05	-54.9484				41.05	-67.4753
41.1	-54.3636				41.1	-67.5899
41.15	-54.4792				41.15	-67.8236
41.2	-54.9309				41.2	-67.7393
41.25	-54.8756				41.25	-67.843
41.3	-54.6443				41.3	-67.9767
41.35	-54.9379				41.35	-67.7339
41.4	-55.2551				41.4	-67.5667
41.45	-54.9625				41.45	-67.5708
41.5	-54.7366				41.5	-67.6066
41.55	-55.0425				41.55	-67.5153
41.6	-55.0759				41.6	-67.1906
41.65	-54.5381				41.65	-67.1943
41.7	-54.2646				41.7	-67.3368
41.75	-54.6188				41.75	-67.1525
41.8	-54.8931				41.8	-67.3212
41.85	-54.6236				41.85	-67.5935
41.9	-54.3017				41.9	-67.561
41.95	-54.6528				41.95	-67.7585
42	-55.2294				42	-67.9282
42.05	-55.2074				42.05	-67.8746
42.1	-54.8448				42.1	-67.9303
42.15	-54.7255				42.15	-67.7896
42.2	-54.8077				42.2	-67.7035
42.25	-54.6199				42.25	-67.9552
42.3	-54.2941				42.3	-67.8037
42.35	-54.4924				42.35	-67.4437
42.4	-54.9483				42.4	-67.4938
42.45	-54.7135				42.45	-67.3886
42.5	-54.0868				42.5	-67.0684
42.55	-54.3128				42.55	-67.1166
42.6	-55.2295				42.6	-67.3089
42.65	-55.4891				42.65	-67.5228
42.7	-54.7246				42.7	-67.8246
42.75	-54.1606				42.75	-67.8447
42.8	-54.5853				42.8	-67.8169
42.85	-55.1886				42.85	-67.9597
42.9	-55.0735				42.9	-67.8375
42.95	-54.5405				42.95	-67.687
43	-54.4443				43	-67.8611
43.05	-54.8675				43.05	-67.7228
43.1	-55.0158				43.1	-67.4376
43.15	-54.732				43.15	-67.6948
43.2	-54.6995				43.2	-67.8405
43.25	-54.802				43.25	-67.5327
43.3	-54.5848				43.3	-67.5328
43.35	-54.4593				43.35	-67.6317
43.4	-54.7132				43.4	-67.4856
43.45	-54.8929				43.45	-67.6446
43.5	-55.0109				43.5	-67.9119
43.55	-55.0861				43.55	-67.831
43.6	-54.9189				43.6	-67.7995
43.65	-54.9638				43.65	-68.0827
43.7	-55.0805				43.7	-68.1281
43.75	-54.8535				43.75	-67.8677
43.8	-54.5055				43.8	-67.8242
43.85	-54.323				43.85	-67.6134
43.9	-54.5754				43.9	-67.2346
43.95	-54.7427				43.95	-67.3852
44	-54.7711				44	-67.6351
44.05	-54.8763				44.05	-67.4473
44.1	-54.823				44.1	-67.2895
44.15	-54.7419				44.15	-67.5026
44.2	-54.6106				44.2	-67.5775
44.25	-54.5257				44.25	-67.5358
44.3	-54.4012				44.3	-67.9847
44.35	-54.2574				44.35	-68.3009
44.4	-54.2101				44.4	-67.8681
44.45	-54.4464				44.45	-67.5141
44.5	-54.7565				44.5	-67.7634
44.55	-55.0926				44.55	-67.7768
44.6	-55.3978				44.6	-67.3563
44.65	-55.3428				44.65	-67.4242
44.7	-55.1272				44.7	-67.8315
44.75	-55.0876				44.75	-67.6146
44.8	-55.122				44.8	-67.166
44.85	-54.9361				44.85	-67.5148
44.9	-54.927				44.9	-68.0487
44.95	-55.0824				44.95	-67.8612
45	-55.1407				45	-67.7264
45.05	-54.9132				45.05	-68.1006
45.1	-54.6054				45.1	-68.0646
45.15	-54.6574				45.15	-67.6435
45.2	-54.7411				45.2	-67.737
45.25	-54.7124				45.25	-67.938
45.3	-54.7149				45.3	-67.8283
45.35	-54.7422				45.35	-67.811
45.4	-54.5957				45.4	-67.8554
45.45	-54.2867				45.45	-67.8408
45.5	-54.4113				45.5	-67.6057
45.55	-54.638				45.55	-67.2299
45.6	-54.5837				45.6	-67.1932
45.65	-54.8666				45.65	-67.3684
45.7	-55.079				45.7	-67.523
45.75	-54.8495				45.75	-67.623
45.8	-54.6499				45.8	-67.8066
45.85	-54.4903				45.85	-68.0113
45.9	-54.53				45.9	-68.0284
45.95	-54.5551				45.95	-67.8934
46	-54.3558				46	-67.6511
46.05	-54.3876				46.05	-67.5577
46.1	-54.359				46.1	-67.4683
46.15	-54.2236				46.15	-67.4114
46.2	-54.6245				46.2	-67.4153
46.25	-54.982				46.25	-67.3013
46.3	-54.8649				46.3	-66.9728
46.35	-54.7692				46.35	-66.7044
46.4	-54.6354				46.4	-66.6577
46.45	-54.6371				46.45	-66.7174
46.5	-54.8866				46.5	-66.7984
46.55	-54.9274				46.55	-67.0189
46.6	-54.8245				46.6	-67.2318
46.65	-54.7445				46.65	-67.425
46.7	-54.4917				46.7	-67.5895
46.75	-54.4276				46.75	-67.6659
46.8	-54.5526				46.8	-67.6114
46.85	-54.4473				46.85	-67.5231
46.9	-54.3852				46.9	-67.5269
46.95	-54.3375				46.95	-67.7091
47	-54.2308				47	-67.7531
47.05	-54.4153				47.05	-67.5696
47.1	-54.4314				47.1	-67.3663
47.15	-54.1267				47.15	-67.2133
47.2	-54.1464				47.2	-67.1337
47.25	-54.1033				47.25	-66.9865
47.3	-53.8918				47.3	-66.9428
47.35	-54.1461				47.35	-67.0568
47.4	-54.3358				47.4	-67.4075
47.45	-54.2038				47.45	-67.7941
47.5	-54.3896				47.5	-68.1088
47.55	-54.5157				47.55	-68.0808
47.6	-54.3744				47.6	-67.6287
47.65	-54.5623				47.65	-67.3826
47.7	-54.5432				47.7	-67.426
47.75	-54.0772				47.75	-67.6216
47.8	-54.1633				47.8	-67.548
47.85	-54.562				47.85	-67.3401
47.9	-54.5227				47.9	-67.4381
47.95	-54.4307				47.95	-67.4352
48	-54.2531				48	-67.4687
48.05	-53.8869				48.05	-67.5651
48.1	-53.9379				48.1	-67.558
48.15	-54.1249				48.15	-67.5142
48.2	-53.883				48.2	-67.4703
48.25	-53.7242				48.25	-67.7558
48.3	-54.0882				48.3	-67.9722
48.35	-54.3361				48.35	-67.8211
48.4	-54.359				48.4	-67.5437
48.45	-54.6816				48.45	-67.4254
48.5	-54.6997				48.5	-67.661
48.55	-54.125				48.55	-67.6353
48.6	-54.0851				48.6	-67.4917
48.65	-54.5255				48.65	-67.6226
48.7	-54.3511				48.7	-67.5831
48.75	-53.9784				48.75	-67.547
48.8	-54.0972				48.8	-67.5895
48.85	-54.1307				48.85	-67.5739
48.9	-54.0341				48.9	-67.5316
48.95	-54.4605				48.95	-67.4142
49	-54.9705				49	-67.6321
49.05	-54.7123				49.05	-67.8369
49.1	-54.2141				49.1	-67.7141
49.15	-54.2216				49.15	-67.8483
49.2	-54.1821				49.2	-67.9866
49.25	-53.8318				49.25	-67.9291
49.3	-53.9247				49.3	-67.7601
49.35	-54.2538				49.35	-67.5027
49.4	-54.1078				49.4	-67.5758
49.45	-53.9414				49.45	-67.5376
49.5	-54.3727				49.5	-67.1538
49.55	-54.6566				49.55	-67.0289
49.6	-54.1981				49.6	-67.14
49.65	-53.9082				49.65	-67.3766
49.7	-54.1865				49.7	-67.6412
49.75	-54.2162				49.75	-67.694
49.8	-53.8098				49.8	-67.7418
49.85	-53.8534				49.85	-67.6926
49.9	-54.3504				49.9	-67.5529
49.95	-54.2046				49.95	-67.6861
50	-53.5493				50	-67.7182
50.05	-53.5382				50.05	-67.6592
50.1	-54.0664				50.1	-67.7851
50.15	-54.1018				50.15	-67.7145
50.2	-53.5589				50.2	-67.5935
50.25	-53.4291				50.25	-67.504
50.3	-53.8575				50.3	-67.4573
50.35	-53.8962				50.35	-67.7265
50.4	-53.5741				50.4	-67.6455
50.45	-53.7863				50.45	-67.1796
50.5	-54.2949				50.5	-67.3172
50.55	-54.2909				50.55	-67.5118
50.6	-53.834				50.6	-67.3907
50.65	-53.6182				50.65	-67.5663
50.7	-53.8034				50.7	-67.665
50.75	-53.8189				50.75	-67.5384
50.8	-53.4752				50.8	-67.7616
50.85	-53.4415				50.85	-67.9803
50.9	-53.9509				50.9	-67.9247
50.95	-54.3809				50.95	-67.894
51	-54.2143				51	-67.5644
51.05	-53.6393				51.05	-67.2078
51.1	-53.5392				51.1	-67.4237
51.15	-53.9865				51.15	-67.5227
51.2	-54.1602				51.2	-67.3715
51.25	-53.6737				51.25	-67.4906
51.3	-53.2009				51.3	-67.4474
51.35	-53.4617				51.35	-67.3403
51.4	-53.8555				51.4	-67.7355
51.45	-53.5875				51.45	-67.9049
51.5	-53.2662				51.5	-67.4622
51.55	-53.558				51.55	-67.3523
51.6	-53.7382				51.6	-67.5372
51.65	-53.6029				51.65	-67.4532
51.7	-53.8101				51.7	-67.475
51.75	-53.954				51.75	-67.5204
51.8	-53.584				51.8	-67.2363
51.85	-53.3068				51.85	-67.1675
51.9	-53.2072				51.9	-67.495
51.95	-53.1616				51.95	-67.4337
52	-53.2559				52	-67.2322
52.05	-53.3776				52.05	-67.6243
52.1	-53.7111				52.1	-67.9377
52.15	-53.9303				52.15	-67.8374
52.2	-53.773				52.2	-68.0286
52.25	-53.5709				52.25	-68.1725
52.3	-53.4231				52.3	-67.7728
52.35	-53.355				52.35	-67.543
52.4	-53.182				52.4	-67.7205
52.45	-53.2454				52.45	-67.6046
52.5	-53.5878				52.5	-67.2842
52.55	-53.8154				52.55	-67.5544
52.6	-53.839				52.6	-67.8977
52.65	-53.7658				52.65	-67.4995
52.7	-53.5835				52.7	-67.2062
52.75	-53.377				52.75	-67.4739
52.8	-53.4049				52.8	-67.4458
52.85	-53.3465				52.85	-67.0767
52.9	-53.1607				52.9	-67.3587
52.95	-53.0831				52.95	-67.867
53	-53.2047				53	-67.5948
53.05	-53.3386				53.05	-67.2293
53.1	-53.5626				53.1	-67.6074
53.15	-53.842				53.15	-67.872
53.2	-54.0716				53.2	-67.5619
53.25	-53.9919				53.25	-67.4359
53.3	-53.619				53.3	-67.7038
53.35	-53.3832				53.35	-67.7716
53.4	-53.3542				53.4	-67.592
53.45	-53.5278				53.45	-67.7084
53.5	-53.4667				53.5	-67.6992
53.55	-53.2929				53.55	-67.3855
53.6	-53.2982				53.6	-67.4292
53.65	-53.2957				53.65	-67.5734
53.7	-53.4861				53.7	-67.5874
53.75	-53.5753				53.75	-67.7987
53.8	-53.3537				53.8	-67.9322
53.85	-53.1549				53.85	-67.9063
53.9	-53.0841				53.9	-67.8663
53.95	-53.3771				53.95	-67.6815
54	-53.51				54	-67.454
54.05	-53.1985				54.05	-67.3478
54.1	-53.2306				54.1	-67.5458
54.15	-53.4394				54.15	-67.72
54.2	-53.4525				54.2	-67.6776
54.25	-53.5177				54.25	-67.6901
54.3	-53.6195				54.3	-67.9039
54.35	-53.8123				54.35	-68.0877
54.4	-53.8117				54.4	-68.0924
54.45	-53.5979				54.45	-68.0452
54.5	-53.736				54.5	-67.9069
54.55	-53.7228				54.55	-67.8869
54.6	-53.3707				54.6	-68.0086
54.65	-53.3768				54.65	-68.1173
54.7	-53.4426				54.7	-67.9592
54.75	-53.3276				54.75	-67.7552
54.8	-53.4084				54.8	-67.8334
54.85	-53.4406				54.85	-68.0267
54.9	-53.3028				54.9	-67.9296
54.95	-53.1323				54.95	-67.653
55	-53.067				55	-67.381
55.05	-53.4339				55.05	-67.3663
55.1	-53.6206				55.1	-67.404
55.15	-53.2902				55.15	-67.3835
55.2	-53.2983				55.2	-67.4265
55.25	-53.4585				55.25	-67.6198
55.3	-53.4293				55.3	-67.6698
55.35	-53.7342				55.35	-67.6631
55.4	-53.9777				55.4	-67.799
55.45	-53.7517				55.45	-67.973
55.5	-53.619				55.5	-68.0678
55.55	-53.5294				55.55	-68.063
55.6	-53.3995				55.6	-67.9775
55.65	-53.4295				55.65	-67.7758
55.7	-53.2231				55.7	-67.5541
55.75	-52.9659				55.75	-67.3983
55.8	-53.1982				55.8	-67.5832
55.85	-53.3467				55.85	-67.7132
55.9	-53.2953				55.9	-67.6208
55.95	-53.5781				55.95	-67.6884
56	-53.7028				56	-67.7842
56.05	-53.4404				56.05	-68.0119
56.1	-53.4854				56.1	-68.2363
56.15	-53.4447				56.15	-68.3772
56.2	-53.0381				56.2	-68.2616
56.25	-53.0895				56.25	-67.8705
56.3	-53.3439				56.3	-67.9282
56.35	-53.3491				56.35	-68.1127
56.4	-53.6659				56.4	-67.9467
56.45	-53.876				56.45	-67.6049
56.5	-53.4833				56.5	-67.4152
56.55	-53.2827				56.55	-67.7067
56.6	-53.4078				56.6	-67.8132
56.65	-53.337				56.65	-67.6871
56.7	-53.3024				56.7	-67.6478
56.75	-53.451				56.75	-67.4829
56.8	-53.4057				56.8	-67.5715
56.85	-53.3188				56.85	-67.8425
56.9	-53.5147				56.9	-68.0539
56.95	-53.4676				56.95	-67.9992
57	-53.1735				57	-67.7303
57.05	-53.3986				57.05	-67.8982
57.1	-53.4647				57.1	-68.0207
57.15	-52.7755				57.15	-67.7792
57.2	-52.406				57.2	-67.5461
57.25	-52.6876				57.25	-67.3923
57.3	-52.7723				57.3	-67.5548
57.35	-52.7983				57.35	-67.5801
57.4	-53.2717				57.4	-67.3269
57.45	-53.5568				57.45	-67.3736
57.5	-53.2841				57.5	-67.6043
57.55	-53.164				57.55	-67.9139
57.6	-53.3791				57.6	-68.0879
57.65	-53.2573				57.65	-67.8877
57.7	-52.8765				57.7	-67.7637
57.75	-53.03				57.75	-67.7306
57.8	-53.4707				57.8	-67.6943
57.85	-53.3973				57.85	-67.838
57.9	-53.235				57.9	-67.9779
57.95	-53.5648				57.95	-68.0323
58	-53.5666				58	-68.0226
58.05	-52.9731				58.05	-67.8065
58.1	-52.9572				58.1	-67.6951
58.15	-53.5538				58.15	-67.6783
58.2	-53.4289				58.2	-67.5676
58.25	-52.5182				58.25	-67.6559
58.3	-52.2871				58.3	-67.729
58.35	-52.8017				58.35	-67.8587
58.4	-52.9074				58.4	-68.0934
58.45	-52.7839				58.45	-67.8916
58.5	-53.2712				58.5	-67.6833
58.55	-53.9144				58.55	-67.7675
58.6	-53.7899				58.6	-67.8176
58.65	-53.2955				58.65	-67.8928
58.7	-53.3762				58.7	-67.6034
58.75	-53.684				58.75	-67.143
58.8	-53.409				58.8	-67.4026
58.85	-52.9405				58.85	-67.7139
58.9	-53.1464				58.9	-67.5379
58.95	-53.6507				58.95	-67.6118
59	-53.7236				59	-67.6436
59.05	-53.4182				59.05	-67.3701
59.1	-53.34				59.1	-67.6377
59.15	-53.7272				59.15	-67.898
59.2	-54.0187				59.2	-67.573
59.25	-53.7016				59.25	-67.4688
59.3	-53.3055				59.3	-67.5166
59.35	-53.5373				59.35	-67.5335
59.4	-53.8845				59.4	-67.8726
59.45	-53.562				59.45	-67.9772
59.5	-53.081				59.5	-67.7032
59.55	-53.4373				59.55	-67.7425
59.6	-54.2915				59.6	-67.6768
59.65	-54.4372				59.65	-67.197
59.7	-53.7489				59.7	-67.1782
59.75	-53.4113				59.75	-67.5315
59.8	-53.886				59.8	-67.4927
59.85	-54.122				59.85	-67.514
59.9	-53.7264				59.9	-67.7075
59.95	-53.5719				59.95	-67.4917
60	-53.8408				60	-67.3144
60.05	-53.8634				60.05	-67.6579
60.1	-53.7592				60.1	-67.8593
60.15	-53.7877				60.15	-67.7185
60.2	-53.5643				60.2	-67.8108
60.25	-53.3958				60.25	-67.8394
60.3	-53.5182				60.3	-67.6718
60.35	-53.6987				60.35	-67.8252
60.4	-53.8557				60.4	-67.8853
60.45	-53.8109				60.45	-67.5263
60.5	-53.8144				60.5	-67.311
60.55	-53.8687				60.55	-67.4028
60.6	-53.7214				60.6	-67.3116
60.65	-53.4888				60.65	-67.1588
60.7	-53.298				60.7	-67.5099
60.75	-53.2418				60.75	-67.7555
60.8	-53.1367				60.8	-67.4145
60.85	-53.1933				60.85	-67.3992
60.9	-53.4833				60.9	-67.8387
60.95	-53.8552				60.95	-67.9394
61	-54.0796				61	-67.7512
61.05	-54.0025				61.05	-67.7602
61.1	-53.7628				61.1	-67.693
61.15	-53.5075				61.15	-67.3259
61.2	-53.4193				61.2	-67.345
61.25	-53.5091				61.25	-67.7981
61.3	-53.5428				61.3	-67.6765
61.35	-53.2244				61.35	-67.1595
61.4	-53.0564				61.4	-67.3205
61.45	-53.2774				61.45	-67.8307
61.5	-53.6546				61.5	-67.7234
61.55	-53.8589				61.55	-67.3756
61.6	-53.9054				61.6	-67.6449
61.65	-53.8457				61.65	-67.9372
61.7	-53.5161				61.7	-67.6736
61.75	-53.1665				61.75	-67.52
61.8	-53.0279				61.8	-67.7541
61.85	-53.2088				61.85	-67.7722
61.9	-53.2845				61.9	-67.6871
61.95	-53.2314				61.95	-67.9841
62	-53.3658				62	-68.231
62.05	-53.4425				62.05	-68.0123
62.1	-53.5632				62.1	-67.6175
62.15	-53.5369				62.15	-67.4734
62.2	-53.2226				62.2	-67.6855
62.25	-53.2179				62.25	-67.6901
62.3	-53.4091				62.3	-67.6527
62.35	-53.5663				62.35	-67.8085
62.4	-53.6499				62.4	-67.7454
62.45	-53.3788				62.45	-67.4922
62.5	-53.2953				62.5	-67.3796
62.55	-53.4057				62.55	-67.5916
62.6	-53.2377				62.6	-67.5776
62.65	-53.385				62.65	-67.2533
62.7	-53.6461				62.7	-67.1544
62.75	-53.5631				62.75	-67.4567
62.8	-53.5538				62.8	-67.7482
62.85	-53.6398				62.85	-67.8108
62.9	-53.8157				62.9	-67.7136
62.95	-54.007				62.95	-67.6153
63	-53.8978				63	-67.6508
63.05	-53.8031				63.05	-67.8411
63.1	-53.719				63.1	-67.9973
63.15	-53.44				63.15	-67.99
63.2	-53.4518				63.2	-68.0299
63.25	-53.555				63.25	-68.0966
63.3	-53.3101				63.3	-68.1833
63.35	-53.2417				63.35	-68.2548
63.4	-53.3802				63.4	-68.2659
63.45	-53.5527				63.45	-68.3708
63.5	-54.0107				63.5	-68.403
63.55	-54.1377				63.55	-68.1316
63.6	-53.9375				63.6	-67.7772
63.65	-54.1207				63.65	-67.5252
63.7	-54.239				63.7	-67.4978
63.75	-54.1887				63.75	-67.3802
63.8	-54.2931				63.8	-67.2628
63.85	-54.0861				63.85	-67.3054
63.9	-53.8235				63.9	-67.5806
63.95	-53.9721				63.95	-67.7862
64	-54.0742				64	-67.8438
64.05	-54.0696				64.05	-67.9128
64.1	-54.1061				64.1	-67.8201
64.15	-54.0049				64.15	-67.7991
64.2	-53.9061				64.2	-67.9405
64.25	-53.8817				64.25	-68.1897
64.3	-53.7497				64.3	-68.1735
64.35	-53.737				64.35	-67.8721
64.4	-53.8625				64.4	-67.6424
64.45	-53.7256				64.45	-67.4679
64.5	-53.622				64.5	-67.429
64.55	-54.0675				64.55	-67.4665
64.6	-54.2829				64.6	-67.584
64.65	-53.9346				64.65	-67.5952
64.7	-53.9358				64.7	-67.4932
64.75	-53.9843				64.75	-67.7504
64.8	-53.6974				64.8	-68.0941
64.85	-53.7904				64.85	-68.1602
64.9	-53.8821				64.9	-68.0227
64.95	-53.427				64.95	-67.9258
65	-53.285				65	-68.131
65.05	-53.746				65.05	-68.146
65.1	-54.0346				65.1	-67.8335
65.15	-53.9592				65.15	-67.5373
65.2	-53.8143				65.2	-67.3868
65.25	-53.5381				65.25	-67.4405
65.3	-53.3843				65.3	-67.3761
65.35	-53.7137				65.35	-67.3809
65.4	-53.9715				65.4	-67.547
65.45	-53.7598				65.45	-67.5487
65.5	-53.726				65.5	-67.7127
65.55	-53.9423				65.55	-67.8394
65.6	-53.8055				65.6	-67.6937
65.65	-53.6507				65.65	-67.5786
65.7	-53.9328				65.7	-67.5888
65.75	-53.9108				65.75	-67.8592
65.8	-53.4895				65.8	-67.9379
65.85	-53.6593				65.85	-67.5797
65.9	-54.0164				65.9	-67.5566
65.95	-53.7549				65.95	-67.8229
66	-53.4738				66	-67.9009
66.05	-53.8195				66.05	-67.7188
66.1	-54.1713				66.1	-67.4705
66.15	-53.9791				66.15	-67.6427
66.2	-53.8135				66.2	-67.735
66.25	-53.8448				66.25	-67.5719
66.3	-53.423				66.3	-67.7032
66.35	-52.8007				66.35	-67.9009
66.4	-53.0177				66.4	-68.0326
66.45	-53.6903				66.45	-68.1102
66.5	-53.7915				66.5	-68.0181
66.55	-53.4672				66.55	-68.0347
66.6	-53.3787				66.6	-67.8097
66.65	-53.5331				66.65	-67.3503
66.7	-53.4755				66.7	-67.4224
66.75	-53.2382				66.75	-67.4506
66.8	-53.3679				66.8	-67.1822
66.85	-53.5853				66.85	-67.3266
66.9	-53.4266				66.9	-67.673
66.95	-53.1952				66.95	-67.8416
67	-53.3096				67	-67.8273
67.05	-53.532				67.05	-67.5365
67.1	-53.3471				67.1	-67.4545
67.15	-52.886				67.15	-67.6795
67.2	-52.9475				67.2	-67.7403
67.25	-53.5774				67.25	-67.8883
67.3	-53.8771				67.3	-68.0184
67.35	-53.4407				67.35	-67.9007
67.4	-53.1017				67.4	-68.108
67.45	-53.4359				67.45	-68.3004
67.5	-53.7597				67.5	-68.0362
67.55	-53.4729				67.55	-67.9096
67.6	-53.2134				67.6	-67.841
67.65	-53.577				67.65	-67.5918
67.7	-54.0123				67.7	-67.534
67.75	-53.8195				67.75	-67.4186
67.8	-53.3411				67.8	-67.0609
67.85	-53.4532				67.85	-67.1091
67.9	-53.9673				67.9	-67.4654
67.95	-54.0067				67.95	-67.6856
68	-53.3838				68	-68.011
68.05	-52.9294				68.05	-68.2092
68.1	-53.254				68.1	-67.8854
68.15	-53.5683				68.15	-67.6628
68.2	-53.4004				68.2	-67.7657
68.25	-53.4501				68.25	-67.5502
68.3	-53.8266				68.3	-67.2508
68.35	-53.8804				68.35	-67.469
68.4	-53.7326				68.4	-67.6106
68.45	-53.8069				68.45	-67.4733
68.5	-53.7713				68.5	-67.8267
68.55	-53.6066				68.55	-68.2067
68.6	-53.4979				68.6	-67.957
68.65	-53.3203				68.65	-67.726
68.7	-53.4768				68.7	-67.7196
68.75	-53.9097				68.75	-67.557
68.8	-54.069				68.8	-67.3735
68.85	-53.8196				68.85	-67.3349
68.9	-53.6042				68.9	-67.2357
68.95	-53.6062				68.95	-67.1568
69	-53.4554				69	-67.318
69.05	-53.4554				69.05	-67.2239
69.1	-53.7012				69.1	-66.9186
69.15	-53.8811				69.15	-67.1575
69.2	-53.8969				69.2	-67.5826
69.25	-53.9458				69.25	-67.4638
69.3	-53.9762				69.3	-67.1836
69.35	-53.5962				69.35	-67.4651
69.4	-53.2322				69.4	-67.7119
69.45	-53.2809				69.45	-67.4184
69.5	-53.6075				69.5	-67.3537
69.55	-53.6299				69.55	-67.7535
69.6	-53.2895				69.6	-67.7779
69.65	-53.0181				69.65	-67.4437
69.7	-53.0845				69.7	-67.5792
69.75	-53.2963				69.75	-67.7848
69.8	-53.6489				69.8	-67.2862
69.85	-54.0019				69.85	-66.7468
69.9	-53.9317				69.9	-67.0769
69.95	-53.5943				69.95	-67.4313
70	-53.3742				70	-67.2026
70.05	-53.5474				70.05	-67.2918
70.1	-53.6796				70.1	-67.7516
70.15	-53.6046				70.15	-67.7074
70.2	-53.3096				70.2	-67.3602
70.25	-52.8802				70.25	-67.3688
70.3	-53.0161				70.3	-67.5644
70.35	-53.3815				70.35	-67.7622
70.4	-53.4978				70.4	-67.8541
70.45	-53.3038				70.45	-67.7
70.5	-52.9593				70.5	-67.7093
70.55	-53.1395				70.55	-67.7352
70.6	-53.4587				70.6	-67.6966
70.65	-53.3829				70.65	-67.6798
70.7	-53.4027				70.7	-67.4954
70.75	-53.3447				70.75	-67.3244
70.8	-53.1561				70.8	-67.2296
70.85	-53.1693				70.85	-67.1213
70.9	-53.2316				70.9	-66.9865
70.95	-53.5178				70.95	-67.1623
71	-53.6802				71	-67.4172
71.05	-53.3127				71.05	-67.3434
71.1	-53.2122				71.1	-67.2856
71.15	-53.3289				71.15	-67.527
71.2	-53.1778				71.2	-67.8721
71.25	-53.3419				71.25	-67.9482
71.3	-53.5517				71.3	-67.9112
71.35	-53.3954				71.35	-67.987
71.4	-53.3925				71.4	-68.0079
71.45	-53.4478				71.45	-67.7241
71.5	-53.4323				71.5	-67.4699
71.55	-53.5229				71.55	-67.4059
71.6	-53.444				71.6	-67.3895
71.65	-53.4481				71.65	-67.1953
71.7	-53.5836				71.7	-67.0677
71.75	-53.3114				71.75	-67.1033
71.8	-53.2232				71.8	-67.1975
71.85	-53.331				71.85	-67.1467
71.9	-53.1807				71.9	-67.0646
71.95	-53.3661				71.95	-67.0192
72	-53.6435				72	-67.0967
72.05	-53.5492				72.05	-67.0641
72.1	-53.4386				72.1	-67.1065
72.15	-53.2236				72.15	-67.2267
72.2	-53.1353				72.2	-67.1565
72.25	-53.537				72.25	-66.8813
72.3	-53.6147				72.3	-66.5886
72.35	-53.2486				72.35	-66.4521
72.4	-53.2393				72.4	-66.2751
72.45	-53.221				72.45	-66.1248
72.5	-53.1382				72.5	-65.9905
72.55	-53.6499				72.55	-65.8674
72.6	-53.9571				72.6	-65.5599
72.65	-53.4998				72.65	-65.0958
72.7	-53.1635				72.7	-64.8088
72.75	-52.9836				72.75	-64.584
72.8	-52.6989				72.8	-64.4733
72.85	-52.7646				72.85	-64.2971
72.9	-52.9896				72.9	-63.9814
72.95	-53.0605				72.95	-63.5743
73	-53.2412				73	-62.9599
73.05	-53.2657				73.05	-62.6882
73.1	-52.9619				73.1	-62.695
73.15	-53.0776				73.15	-62.4882
73.2	-53.4792				73.2	-62.0119
73.25	-53.229				73.25	-61.4718
73.3	-52.6835				73.3	-61.3064
73.35	-52.5657				73.35	-61.1916
73.4	-52.2465				73.4	-60.9093
73.45	-51.8655				73.45	-60.6667
73.5	-52.2345				73.5	-60.4284
73.55	-52.4065				73.55	-60.3736
73.6	-51.9696				73.6	-60.3308
73.65	-51.9714				73.65	-60.2608
73.7	-52.2627				73.7	-60.0079
73.75	-52.024				73.75	-59.4593
73.8	-51.5178				73.8	-59.3054
73.85	-51.3582				73.85	-59.261
73.9	-51.1883				73.9	-58.8913
73.95	-50.8515				73.95	-58.472
74	-51.0915				74	-58.1354
74.05	-51.5185				74.05	-58.193
74.1	-51.2385				74.1	-58.1307
74.15	-50.93				74.15	-57.6152
74.2	-51.2855				74.2	-57.1762
74.25	-51.5115				74.25	-56.8288
74.3	-51.1768				74.3	-56.8141
74.35	-50.8983				74.35	-56.938
74.4	-50.8892				74.4	-56.8542
74.45	-50.7083				74.45	-56.8341
74.5	-50.3268				74.5	-56.6457
74.55	-50.2954				74.55	-56.4499
74.6	-50.4289				74.6	-56.445
74.65	-50.1936				74.65	-56.1872
74.7	-50.0525				74.7	-55.9938
74.75	-50.5123				74.75	-55.9328
74.8	-50.7135				74.8	-55.7894
74.85	-50.0465				74.85	-55.7878
74.9	-49.527				74.9	-55.7667
74.95	-49.8174				74.95	-55.6941
75	-50.0907				75	-55.7411
75.05	-49.7785				75.05	-55.743
75.1	-49.6387				75.1	-55.8372
75.15	-49.8993				75.15	-55.8905
75.2	-49.7112				75.2	-55.5954
75.25	-49.0623				75.25	-55.3824
75.3	-49.0264				75.3	-55.3705
75.35	-49.7358				75.35	-55.477
75.4	-49.945				75.4	-55.6682
75.45	-49.2564				75.45	-55.5323
75.5	-48.8998				75.5	-55.363
75.55	-49.3588				75.55	-55.7058
75.6	-49.6694				75.6	-55.8155
75.65	-49.3768				75.65	-55.624
75.7	-49.1292				75.7	-55.859
75.75	-49.4294				75.75	-56.1319
75.8	-49.7327				75.8	-56.2626
75.85	-49.4207				75.85	-56.6189
75.9	-48.971				75.9	-56.8344
75.95	-49.0558				75.95	-56.8897
76	-49.3365				76	-57.196
76.05	-49.187				76.05	-57.3315
76.1	-48.6323				76.1	-57.36
76.15	-48.4064				76.15	-57.638
76.2	-48.9604				76.2	-57.6535
76.25	-49.4597				76.25	-57.77
76.3	-48.9967				76.3	-58.4658
76.35	-48.3258				76.35	-58.8265
76.4	-48.5099				76.4	-58.7635
76.45	-49.0062				76.45	-58.9968
76.5	-48.8582				76.5	-59.2729
76.55	-48.3718				76.55	-59.4878
76.6	-48.3173				76.6	-60.1339
76.65	-48.287				76.65	-60.705
76.7	-48.063				76.7	-60.7427
76.75	-48.2739				76.75	-60.9711
76.8	-48.509				76.8	-61.3785
76.85	-48.3188				76.85	-61.5254
76.9	-48.2195				76.9	-61.8192
76.95	-48.2173				76.95	-62.1483
77	-48.267				77	-62.2183
77.05	-48.2558				77.05	-62.5154
77.1	-48.0143				77.1	-63.1083
77.15	-47.9444				77.15	-63.3519
77.2	-47.9812				77.2	-63.4923
77.25	-47.976				77.25	-64.11
77.3	-48.0384				77.3	-64.6218
77.35	-48.3278				77.35	-64.7817
77.4	-48.5505				77.4	-65.2954
77.45	-48.2873				77.45	-65.9224
77.5	-47.8507				77.5	-66.0856
77.55	-47.4577				77.55	-66.3424
77.6	-47.3038				77.6	-67.1356
77.65	-47.2466				77.65	-67.5844
77.7	-47.3286				77.7	-67.3685
77.75	-47.5173				77.75	-67.5266
77.8	-47.7687				77.8	-68.1954
77.85	-48.0435				77.85	-68.396
77.9	-48.1188				77.9	-68.3825
77.95	-47.8913				77.95	-69.0012
78	-47.5389				78	-69.6351
78.05	-47.4956				78.05	-69.7672
78.1	-47.5227				78.1	-70.1181
78.15	-47.2536				78.15	-70.9637
78.2	-46.981				78.2	-71.3764
78.25	-47.2527				78.25	-71.1777
78.3	-47.7089				78.3	-71.3426
78.35	-48.0102				78.35	-71.9291
78.4	-48.1655				78.4	-72.1349
78.45	-48.0847				78.45	-72.1272
78.5	-47.8895				78.5	-72.6111
78.55	-47.6414				78.55	-73.0262
78.6	-47.7602				78.6	-72.9787
78.65	-48.0414				78.65	-73.1936
78.7	-48.0136				78.7	-73.5621
78.75	-47.9795				78.75	-73.7815
78.8	-47.9879				78.8	-73.8788
78.85	-48.0444				78.85	-73.9183
78.9	-48.0739				78.9	-74.3665
78.95	-47.9766				78.95	-74.8975
79	-48.0743				79	-75.2414
79.05	-48.0936				79.05	-75.5866
79.1	-47.8543				79.1	-75.788
79.15	-47.7388				79.15	-75.8145
79.2	-47.674				79.2	-75.7063
79.25	-47.6384				79.25	-75.7401
79.3	-47.5884				79.3	-75.9244
79.35	-47.6188				79.35	-76.1058
79.4	-47.9155				79.4	-76.1842
79.45	-48.0686				79.45	-76.4178
79.5	-48.1144				79.5	-76.7841
79.55	-48.1701				79.55	-77.0431
79.6	-47.9456				79.6	-77.1905
79.65	-47.668				79.65	-77.3726
79.7	-47.5851				79.7	-77.6623
79.75	-47.7865				79.75	-77.9793
79.8	-47.9807				79.8	-78.1372
79.85	-48.0271				79.85	-78.2007
79.9	-48.3308				79.9	-78.2839
79.95	-48.5048				79.95	-78.2203
80	-48.4373				80	-78.2851
80.05	-48.4307				80.05	-78.4892
80.1	-48.3881				80.1	-78.5122
80.15	-48.4687				80.15	-78.3116
80.2	-48.3844				80.2	-78.2359
80.25	-48.2109				80.25	-78.2719
80.3	-48.4817				80.3	-78.3038
80.35	-48.7002				80.35	-78.3116
80.4	-48.7498				80.4	-78.4691
80.45	-48.8148				80.45	-78.668
80.5	-48.6108				80.5	-78.932
80.55	-48.5671				80.55	-79.0326
80.6	-48.7748				80.6	-78.8645
80.65	-48.9208				80.65	-78.5641
80.7	-49.1092				80.7	-78.3118
80.75	-48.9277				80.75	-78.3294
80.8	-48.6236				80.8	-78.3385
80.85	-48.7597				80.85	-78.4809
80.9	-48.6905				80.9	-78.5003
80.95	-48.4928				80.95	-78.3203
81	-48.6731				81	-78.1599
81.05	-48.7693				81.05	-77.8091
81.1	-48.8529				81.1	-77.6068
81.15	-49.168				81.15	-77.524
81.2	-49.2651				81.2	-77.4378
81.25	-49.2092				81.25	-77.388
81.3	-49.2381				81.3	-77.2803
81.35	-49.193				81.35	-77.4377
81.4	-49.2921				81.4	-77.5066
81.45	-49.4985				81.45	-77.2197
81.5	-49.3922				81.5	-76.825
81.55	-49.2429				81.55	-76.5589
81.6	-49.3569				81.6	-76.6217
81.65	-49.3367				81.65	-76.4741
81.7	-49.2795				81.7	-76.1507
81.75	-49.6182				81.75	-75.9212
81.8	-49.6574				81.8	-75.5055
81.85	-49.2151				81.85	-75.344
81.9	-49.332				81.9	-75.3432
81.95	-49.7111				81.95	-75.2463
82	-49.6583				82	-75.0475
82.05	-49.9121				82.05	-74.7286
82.1	-50.4196				82.1	-74.8166
82.15	-50.4446				82.15	-74.7775
82.2	-50.4662				82.2	-74.2508
82.25	-50.7413				82.25	-73.9521
82.3	-50.7656				82.3	-73.8179
82.35	-50.6547				82.35	-73.65
82.4	-50.8523				82.4	-73.1711
82.45	-50.9205				82.45	-72.5945
82.5	-50.6867				82.5	-72.5337
82.55	-50.8798				82.55	-72.3431
82.6	-51.3435				82.6	-71.9063
82.65	-51.4217				82.65	-71.7043
82.7	-51.3773				82.7	-71.3782
82.75	-51.5754				82.75	-71.0226
82.8	-51.5882				82.8	-70.6726
82.85	-51.3654				82.85	-70.2563
82.9	-51.5053				82.9	-70.0482
82.95	-51.6657				82.95	-69.7166
83	-51.3458				83	-69.2926
83.05	-51.2113				83.05	-68.9687
83.1	-51.6655				83.1	-68.4165
83.15	-52.1095				83.15	-67.9836
83.2	-52.0854				83.2	-67.7117
83.25	-51.9765				83.25	-67.2627
83.3	-51.9592				83.3	-66.8099
83.35	-51.6771				83.35	-66.1398
83.4	-51.4209				83.4	-65.4971
83.45	-51.6784				83.45	-65.4163
83.5	-51.8749				83.5	-65.3199
83.55	-51.5277				83.55	-65.0201
83.6	-51.3172				83.6	-64.635
83.65	-51.903				83.65	-63.9041
83.7	-52.5894				83.7	-63.4104
83.75	-52.6153				83.75	-63.2773
83.8	-52.4474				83.8	-63.1754
83.85	-52.7203				83.85	-63.2498
83.9	-53.0432				83.9	-62.9878
83.95	-52.9642				83.95	-62.3988
84	-52.8626				84	-62.1702
84.05	-53.2971				84.05	-61.7747
84.1	-53.7919				84.1	-61.1464
84.15	-53.599				84.15	-61.0174
84.2	-53.2707				84.2	-60.9767
84.25	-53.6465				84.25	-60.6496
84.3	-54.2227				84.3	-60.5918
84.35	-54.1551				84.35	-60.4615
84.4	-53.7367				84.4	-59.9468
84.45	-53.9632				84.45	-59.8134
84.5	-54.7488				84.5	-59.7598
84.55	-54.9284				84.55	-59.4138
84.6	-54.5247				84.6	-59.2902
84.65	-54.6811				84.65	-59.0226
84.7	-55.1955				84.7	-58.6392
84.75	-55.1473				84.75	-58.7197
84.8	-54.8882				84.8	-58.5555
84.85	-55.2585				84.85	-57.872
84.9	-55.5572				84.9	-57.7053
84.95	-55.1197				84.95	-57.8804
85	-54.7935				85	-57.6048
85.05	-54.9203				85.05	-57.4411
85.1	-55.0086				85.1	-57.5905
85.15	-55.2147				85.15	-57.3807
85.2	-55.3802				85.2	-57.1275
85.25	-55.2561				85.25	-57.3113
85.3	-55.2939				85.3	-57.3971
85.35	-55.5094				85.35	-57.2293
85.4	-55.7198				85.4	-57.2188
85.45	-55.7159				85.45	-57.0136
85.5	-55.5302				85.5	-56.6276
85.55	-55.4585				85.55	-56.7175
85.6	-55.3941				85.6	-56.8023
85.65	-55.212				85.65	-56.4674
85.7	-55.1707				85.7	-56.3955
85.75	-55.4253				85.75	-56.6309
85.8	-55.4654				85.8	-56.6623
85.85	-55.456				85.85	-56.6128
85.9	-55.7193				85.9	-56.9384
85.95	-56.1023				85.95	-57.2187
86	-56.3032				86	-57.1124
86.05	-56.2728				86.05	-57.1672
86.1	-56.3348				86.1	-57.3466
86.15	-56.4282				86.15	-57.1116
86.2	-56.2938				86.2	-56.9363
86.25	-56.038				86.25	-57.4082
86.3	-56.0494				86.3	-57.727
86.35	-56.1823				86.35	-57.3606
86.4	-56.2089				86.4	-57.2688
86.45	-56.1238				86.45	-57.888
86.5	-56.2864				86.5	-58.2433
86.55	-56.4558				86.55	-58.1314
86.6	-56.4762				86.6	-58.4603
86.65	-56.5651				86.65	-58.9647
86.7	-56.8307				86.7	-58.9837
86.75	-56.8774				86.75	-59.0311
86.8	-56.6341				86.8	-59.5234
86.85	-56.5179				86.85	-59.8153
86.9	-56.4017				86.9	-59.9292
86.95	-56.5408				86.95	-60.3249
87	-56.8935				87	-60.6942
87.05	-57.1395				87.05	-60.9791
87.1	-57.1781				87.1	-61.0762
87.15	-56.8769				87.15	-61.1655
87.2	-56.9173				87.2	-61.8342
87.25	-57.2277				87.25	-62.4044
87.3	-57.1776				87.3	-62.5318
87.35	-57.0197				87.35	-62.7087
87.4	-56.9792				87.4	-63.0824
87.45	-57.1301				87.45	-63.5513
87.5	-57.3302				87.5	-63.9669
87.55	-57.4878				87.55	-64.478
87.6	-57.8815				87.6	-64.9198
87.65	-57.9474				87.65	-65.2939
87.7	-57.3914				87.7	-65.675
87.75	-57.0918				87.75	-66.0795
87.8	-57.2344				87.8	-66.3942
87.85	-57.559				87.85	-66.5556
87.9	-57.8378				87.9	-66.8281
87.95	-57.9359				87.95	-67.2393
88	-58.0394				88	-67.4948
88.05	-58.0173				88.05	-67.5092
88.1	-57.896				88.1	-67.7027
88.15	-58.0016				88.15	-68.1673
88.2	-58.0985				88.2	-68.7236
88.25	-58.0456				88.25	-69.282
88.3	-57.9506				88.3	-69.7611
88.35	-57.7881				88.35	-70.0552
88.4	-57.8438				88.4	-70.3405
88.45	-57.9895				88.45	-70.7774
88.5	-58.0369				88.5	-71.2437
88.55	-58.2497				88.55	-71.4159
88.6	-58.3166				88.6	-71.3618
88.65	-58.1529				88.65	-71.2485
88.7	-58.198				88.7	-71.3553
88.75	-58.1399				88.75	-71.5582
88.8	-57.8148				88.8	-71.7588
88.85	-57.6836				88.85	-72.0055
88.9	-57.6585				88.9	-72.5214
88.95	-57.5761				88.95	-72.947
89	-57.5659				89	-73.1698
89.05	-57.4895				89.05	-73.3451
89.1	-57.5509				89.1	-73.2705
89.15	-57.7973				89.15	-73.3217
89.2	-57.8764				89.2	-73.6403
89.25	-57.9579				89.25	-74.2158
89.3	-57.837				89.3	-74.6552
89.35	-57.4164				89.35	-74.7069
89.4	-57.533				89.4	-74.7814
89.45	-57.8008				89.45	-74.9908
89.5	-57.4917				89.5	-75.3408
89.55	-57.4518				89.55	-75.4301
89.6	-57.8026				89.6	-75.286
89.65	-57.8401				89.65	-75.3582
89.7	-57.9569				89.7	-75.4593
89.75	-58.112				89.75	-75.78
89.8	-57.8732				89.8	-76.173
89.85	-57.7347				89.85	-76.316
89.9	-57.5657				89.9	-76.3498
89.95	-57.145				89.95	-76.3325
90	-57.1178				90	-76.5362
90.05	-57.3636				90.05	-76.7001
90.1	-57.3763				90.1	-76.6716
90.15	-57.3896				90.15	-76.9127
90.2	-57.5025				90.2	-77.2782
90.25	-57.2921				90.25	-77.4858
90.3	-57.0209				90.3	-77.251
90.35	-57.1086				90.35	-76.792
90.4	-56.9926				90.4	-76.7913
90.45	-56.6701				90.45	-76.9171
90.5	-56.8741				90.5	-77.0065
90.55	-57.027				90.55	-77.0049
90.6	-56.5541				90.6	-76.8452
90.65	-56.4611				90.65	-77.0875
90.7	-56.8404				90.7	-77.3483
90.75	-56.6706				90.75	-77.278
90.8	-56.4014				90.8	-77.1155
90.85	-56.6926				90.85	-76.8115
90.9	-56.7361				90.9	-76.7687
90.95	-56.3228				90.95	-76.7948
91	-56.2001				91	-76.537
91.05	-56.0624				91.05	-76.3881
91.1	-55.5827				91.1	-76.2811
91.15	-55.5095				91.15	-76.296
91.2	-56.0285				91.2	-76.5173
91.25	-56.1944				91.25	-76.3518
91.3	-55.8536				91.3	-76.0345
91.35	-55.8288				91.35	-75.9125
91.4	-55.9098				91.4	-75.7489
91.45	-55.5677				91.45	-75.7992
91.5	-55.1734				91.5	-75.6877
91.55	-55.1932				91.55	-75.2337
91.6	-55.2246				91.6	-75.1107
91.65	-54.9968				91.65	-75.0405
91.7	-55.0504				91.7	-74.8001
91.75	-55.4072				91.75	-74.664
91.8	-55.3423				91.8	-74.3859
91.85	-54.8832				91.85	-74.1995
91.9	-54.8455				91.9	-74.276
91.95	-55.0775				91.95	-73.9564
92	-54.9173				92	-73.5774
92.05	-54.6606				92.05	-73.4628
92.1	-54.8379				92.1	-73.1894
92.15	-54.981				92.15	-73.1185
92.2	-54.5324				92.2	-73.1767
92.25	-54.1333				92.25	-72.7686
92.3	-54.4963				92.3	-72.3157
92.35	-54.9419				92.35	-72.1387
92.4	-54.6804				92.4	-72.0065
92.45	-54.167				92.45	-72.1038
92.5	-54.3333				92.5	-72.0216
92.55	-54.8104				92.55	-71.3131
92.6	-54.6657				92.6	-70.7668
92.65	-54.2078				92.65	-70.5331
92.7	-54.2235				92.7	-69.9691
92.75	-54.5048				92.75	-69.5884
92.8	-54.37				92.8	-69.5597
92.85	-53.8713				92.85	-69.1445
92.9	-53.8488				92.9	-68.5302
92.95	-54.3151				92.95	-68.1436
93	-54.3189				93	-67.6695
93.05	-53.7361				93.05	-67.1791
93.1	-53.558				93.1	-66.97
93.15	-53.7898				93.15	-66.6018
93.2	-53.6817				93.2	-66.1056
93.25	-53.4695				93.25	-65.9545
93.3	-53.706				93.3	-65.5891
93.35	-53.9053				93.35	-64.9701
93.4	-53.7432				93.4	-64.8302
93.45	-53.6197				93.45	-64.5789
93.5	-53.2665				93.5	-63.8209
93.55	-52.7761				93.55	-63.4796
93.6	-52.6585				93.6	-63.5388
93.65	-52.7215				93.65	-63.1536
93.7	-52.8405				93.7	-62.7522
93.75	-52.8151				93.75	-62.7028
93.8	-52.6943				93.8	-62.315
93.85	-52.5277				93.85	-61.9197
93.9	-52.2304				93.9	-62.1455
93.95	-52.071				93.95	-62.0815
94	-52.0322				94	-61.1701
94.05	-52.0468				94.05	-60.4316
94.1	-51.8959				94.1	-60.2621
94.15	-51.8426				94.15	-60.0349
94.2	-51.9925				94.2	-59.77
94.25	-52.0495				94.25	-59.7714
94.3	-52.0137				94.3	-59.6212
94.35	-51.9305				94.35	-59.1327
94.4	-51.7672				94.4	-58.9429
94.45	-51.7064				94.45	-59.0816
94.5	-51.7914				94.5	-58.8837
94.55	-51.7252				94.55	-58.4714
94.6	-51.42				94.6	-58.4277
94.65	-51.0076				94.65	-58.2838
94.7	-50.8833				94.7	-57.7585
94.75	-50.9107				94.75	-57.5203
94.8	-50.8535				94.8	-57.6645
94.85	-50.7641				94.85	-57.4834
94.9	-50.9055				94.9	-56.9345
94.95	-51.0391				94.95	-56.7609
95	-51.1941				95	-56.755
95.05	-51.2162				95.05	-56.417
95.1	-51.0481				95.1	-56.288
95.15	-50.8494				95.15	-56.5041
95.2	-50.5062				95.2	-56.4314
95.25	-50.2016				95.25	-56.1903
95.3	-50.0028				95.3	-56.1158
95.35	-50.0604				95.35	-56.0411
95.4	-50.1713				95.4	-56.2093
95.45	-50.0409				95.45	-56.4493
95.5	-49.901				95.5	-56.2302
95.55	-49.8759				95.55	-55.894
95.6	-50.0764				95.6	-55.865
95.65	-50.0709				95.65	-56.2095
95.7	-49.6713				95.7	-56.4524
95.75	-49.5071				95.75	-56.3651
95.8	-49.5544				95.8	-56.3745
95.85	-49.5573				95.85	-56.4642
95.9	-49.2999				95.9	-56.282
95.95	-49.0969				95.95	-55.9824
96	-49.5216				96	-56.0948
96.05	-49.6554				96.05	-56.325
96.1	-49.2224				96.1	-56.4715
96.15	-49.0719				96.15	-56.633
96.2	-49.0793				96.2	-56.8823
96.25	-49.0151				96.25	-56.9701
96.3	-48.7387				96.3	-56.9778
96.35	-48.3564				96.35	-57.1253
96.4	-48.5438				96.4	-57.4541
96.45	-48.7359				96.45	-57.689
96.5	-48.5699				96.5	-57.7484
96.55	-48.7194				96.55	-57.8284
96.6	-48.7826				96.6	-58.0895
96.65	-48.6139				96.65	-58.3329
96.7	-48.6625				96.7	-58.4946
96.75	-48.6847				96.75	-58.7806
96.8	-48.6802				96.8	-59.2069
96.85	-48.4269				96.85	-59.633
96.9	-48.0435				96.9	-60.1827
96.95	-48.1891				96.95	-60.7423
97	-48.2942				97	-61.1085
97.05	-48.1488				97.05	-61.3903
97.1	-48.2514				97.1	-61.7505
97.15	-48.1133				97.15	-62.0529
97.2	-47.7709				97.2	-62.0062
97.25	-47.7601				97.25	-61.8477
97.3	-47.7797				97.3	-61.9152
97.35	-47.7781				97.35	-62.57
97.4	-47.9005				97.4	-63.3405
97.45	-47.8576				97.45	-63.7892
97.5	-47.8402				97.5	-63.9611
97.55	-47.8317				97.55	-64.0733
97.6	-47.7176				97.6	-64.3819
97.65	-47.8768				97.65	-64.8281
97.7	-47.9818				97.7	-65.5198
97.75	-47.7076				97.75	-66.003
97.8	-47.6279				97.8	-66.2852
97.85	-47.5801				97.85	-66.6618
97.9	-47.184				97.9	-67.0286
97.95	-47.1706				97.95	-67.5869
98	-47.3562				98	-67.9818
98.05	-47.2304				98.05	-68.3234
98.1	-47.4091				98.1	-68.8135
98.15	-47.6432				98.15	-69.0394
98.2	-47.4611				98.2	-69.2469
98.25	-47.405				98.25	-69.4458
98.3	-47.313				98.3	-69.605
98.35	-47.098				98.35	-69.733
98.4	-47.4879				98.4	-69.9079
98.45	-47.864				98.45	-70.5055
98.5	-47.6862				98.5	-70.973
98.55	-47.7052				98.55	-71.1388
98.6	-47.6223				98.6	-71.3401
98.65	-47.1249				98.65	-71.5978
98.7	-47.0948				98.7	-72.1717
98.75	-47.485				98.75	-72.5728
98.8	-47.4207				98.8	-72.7284
98.85	-47.1001				98.85	-73.1098
98.9	-47.2646				98.9	-73.3905
98.95	-47.455				98.95	-73.5533
99	-47.3124				99	-73.6245
99.05	-47.4878				99.05	-73.6946
99.1	-47.7408				99.1	-74.0247
99.15	-47.636				99.15	-74.2817
99.2	-47.7606				99.2	-74.5109
99.25	-47.9436				99.25	-74.6766
99.3	-47.5358				99.3	-74.646
99.35	-47.119				99.35	-75.0587
99.4	-47.1155				99.4	-75.6204
99.45	-46.9638				99.45	-75.7287
99.5	-46.7791				99.5	-75.845
99.55	-47.1582				99.55	-76.0263
99.6	-47.7216				99.6	-76.0912
99.65	-47.7821				99.65	-76.0652
99.7	-47.6496				99.7	-75.9428
99.75	-47.8967				99.75	-76.1513
99.8	-48.0325				99.8	-76.4163
99.85	-47.7413				99.85	-76.3197
99.9	-47.7601				99.9	-76.4703
[truncated: 49,613 more rows]

## Sheet: Figure 2c
displacement (nm)		n=5		n=4		n=5		n=4
0	0	0	0	0	0	0	0	0								0	0
12	0	0	0	0	0	0	0	0							qs'	0.01	12
30	0	0	0	0	0	0	0	0								0.025	30
60	0	0	0.28	0.087	0	0	0	0								0.05	60
90	0	0	0.5	0.041	0	0	0	0								0.075	90
120	0.115	0.06	0.71	0.071	0	0	0	0								0.1	120
150	0.7	0.041	0.88	0.075	0	0	0	0								0.125	150
180	0.84	0.052	0.901	0.059	0.32	0.051	0	0								0.15	180
210	0.919	0.037	0.936	0.048	0.61	0.045	0.11	0.072								0.175	210
240	0.928	0.074	0.935	0.026	0.73	0.069	0.53	0.011								0.2	240
270	0.948	0.0201	0.952	0.044	0.852	0.103	0.741	0.057								0.225	270
300	0.947	0.022	0.955	0.0204	0.895	0.036	0.801	0.103								0.25	300
330	0.9645	0.0206	0.958	0.019	0.911	0.004	0.878	0.077								0.275	330
360	0.967	0.0307	0.973	0.036	0.948	0.021	0.928	0.062								0.3	360
420	0.971	0.01	0.937	0.0081	0.937	0.033	0.957	0.068								0.35	420
480	0.982	0.009	1	0.047	0.941	0.037	0.973	0.051								0.4	480
540	0.972	0.006	0.985	0.005	0.952	0.046	0.981	0.022								0.45	540
600	1	0.002	1	0.004	1	0.005	1	0.007								0.5	600

## Sheet: Figure 2d
Current	0	0	0	0	0	0	0	0						0	0.000616306	0.00195056	-0.0117939	-0.0154358		Extent of pre-current priming on the effects of displacement						fits were generated with a sigmoidal function
0.01	0	0	0	0	0	0	0	0						0.00025025	0.000908293	0.00196438	-0.0117838	-0.0154355
0.02	0.19	0.063	0.061	0.035	0	0	0	0						0.000500501	0.001379	0.00200026	-0.0117579	-0.015434
0.05	0.32	0.0701	0.22	0.0703	0	0.025	0.14	0.052						0.000750751	0.00195345	0.00205564	-0.0117181	-0.0154313
0.1	0.59	0.05	0.4779	0.0603	0.307	0.0488	0.395	0.037						0.001001	0.00260744	0.00212931	-0.0116655	-0.0154269
0.12	0.73	0.061	0.67	0.0311	0.448	0.0331	0.544	0.046						0.00125125	0.00332751	0.00222045	-0.0116006	-0.0154209
0.15	0.87	0.058	0.755	0.0409	0.567	0.027	0.658	0.033						0.0015015	0.00410481	0.00232846	-0.0115239	-0.015413
0.2	1	0.0401	0.94	0.08	0.736	0.071	0.823	0.047						0.00175175	0.00493296	0.00245288	-0.0114358	-0.0154032
0.25	1	0.036	1	0.031	0.98	0.131	1	0.058						0.002002	0.00580707	0.0025933	-0.0113366	-0.0153912
														0.00225225	0.00672327	0.0027494	-0.0112264	-0.0153772
Current	Response													0.0025025	0.00767836	0.00292086	-0.0111056	-0.0153609
														0.00275275	0.00866967	0.00310745	-0.0109743	-0.0153422
														0.003003	0.00969488	0.00330892	-0.0108327	-0.0153212
														0.00325325	0.010752	0.00352506	-0.010681	-0.0152977
														0.0035035	0.0118393	0.00375568	-0.0105193	-0.0152717
														0.00375375	0.0129552	0.0040006	-0.0103476	-0.0152431
														0.004004	0.0140984	0.00425964	-0.0101663	-0.0152118
														0.00425425	0.0152674	0.00453266	-0.00997525	-0.0151778
														0.0045045	0.0164613	0.00481951	-0.00977469	-0.0151411
														0.00475475	0.0176788	0.00512004	-0.0095647	-0.0151015
														0.00500501	0.0189192	0.00543412	-0.00934537	-0.0150591
														0.00525526	0.0201814	0.00576163	-0.00911678	-0.0150138
														0.00550551	0.0214645	0.00610244	-0.00887902	-0.0149655
														0.00575576	0.022768	0.00645643	-0.00863218	-0.0149142
														0.00600601	0.0240909	0.0068235	-0.00837632	-0.0148598
														0.00625626	0.0254327	0.00720353	-0.00811152	-0.0148024
														0.00650651	0.0267926	0.00759642	-0.00783786	-0.0147418
														0.00675676	0.0281701	0.00800207	-0.0075554	-0.0146781
														0.00700701	0.0295645	0.00842038	-0.00726421	-0.0146111
														0.00725726	0.0309754	0.00885125	-0.00696435	-0.0145409
														0.00750751	0.0324022	0.00929458	-0.00665589	-0.0144675
														0.00775776	0.0338444	0.00975029	-0.00633888	-0.0143906
														0.00800801	0.0353016	0.0102183	-0.00601339	-0.0143105
														0.00825826	0.0367732	0.0106985	-0.00567947	-0.0142269
														0.00850851	0.0382589	0.0111908	-0.00533718	-0.0141399
														0.00875876	0.0397583	0.0116951	-0.00498657	-0.0140495
														0.00900901	0.0412708	0.0122114	-0.0046277	-0.0139556
														0.00925926	0.0427962	0.0127395	-0.00426061	-0.0138581
														0.00950951	0.0443341	0.0132794	-0.00388537	-0.0137571
														0.00975976	0.0458842	0.013831	-0.00350201	-0.0136525
														0.01	0.0473833	0.0143714	-0.0031264	-0.0135487
														0.01001	0.047446	0.0143942	-0.00311059	-0.0135443
														0.0102603	0.0490193	0.0149689	-0.00271116	-0.0134325
														0.0105105	0.0506037	0.0155551	-0.00230376	-0.013317
														0.0107608	0.0521989	0.0161527	-0.00188844	-0.0131978
														0.011011	0.0538047	0.0167616	-0.00146524	-0.0130749
														0.0112613	0.0554207	0.0173818	-0.00103422	-0.0129482
														0.0115115	0.0570467	0.0180131	-0.000595416	-0.0128178
														0.0117618	0.0586823	0.0186554	-0.00014887	-0.0126836
														0.012012	0.0603274	0.0193088	0.000305373	-0.0125455
														0.0122623	0.0619816	0.0199732	0.00076727	-0.0124036
														0.0125125	0.0636447	0.0206484	0.00123678	-0.0122578
														0.0127628	0.0653165	0.0213344	0.00171386	-0.0121082
														0.013013	0.0669968	0.0220311	0.00219846	-0.0119546
														0.0132633	0.0686852	0.0227385	0.00269056	-0.011797
														0.0135135	0.0703817	0.0234565	0.0031901	-0.0116355
														0.0137638	0.0720858	0.024185	0.00369704	-0.0114701
														0.014014	0.0737976	0.0249239	0.00421136	-0.0113006
														0.0142643	0.0755167	0.0256732	0.004733	-0.0111271
														0.0145145	0.0772429	0.0264329	0.00526193	-0.0109495
														0.0147648	0.0789761	0.0272027	0.0057981	-0.0107679
														0.015015	0.080716	0.0279827	0.00634149	-0.0105821
														0.0152653	0.0824625	0.0287729	0.00689206	-0.0103923
														0.0155155	0.0842153	0.0295731	0.00744975	-0.0101983
														0.0157658	0.0859744	0.0303832	0.00801455	-0.0100002
														0.016016	0.0877395	0.0312032	0.0085864	-0.00979796
														0.0162663	0.0895105	0.0320331	0.00916527	-0.00959151
														0.0165165	0.0912871	0.0328728	0.00975113	-0.00938085
														0.0167668	0.0930692	0.0337221	0.0103439	-0.00916598
														0.017017	0.0948568	0.0345811	0.0109437	-0.00894687
														0.0172673	0.0966495	0.0354496	0.0115503	-0.00872351
														0.0175175	0.0984473	0.0363277	0.0121637	-0.00849587
														0.0177678	0.10025	0.0372152	0.0127839	-0.00826396
														0.018018	0.102057	0.038112	0.013411	-0.00802774
														0.0182683	0.103869	0.0390182	0.0140447	-0.0077872
														0.0185185	0.105686	0.0399336	0.0146851	-0.00754233
														0.0187688	0.107507	0.0408582	0.0153322	-0.00729312
														0.019019	0.109332	0.0417918	0.015986	-0.00703954
														0.0192693	0.111161	0.0427346	0.0166463	-0.00678158
														0.0195195	0.112994	0.0436863	0.0173132	-0.00651924
														0.0197698	0.114831	0.0446469	0.0179866	-0.00625249
														0.02	0.116524	0.0455385	0.0186118	-0.00600318
														0.02002	0.116671	0.0456163	0.0186664	-0.00598132
														0.0202703	0.118515	0.0465946	0.0193528	-0.00570572
														0.0205205	0.120363	0.0475816	0.0200455	-0.00542568
														0.0207708	0.122213	0.0485772	0.0207447	-0.00514118
														0.021021	0.124067	0.0495814	0.0214502	-0.0048522
														0.0212713	0.125924	0.0505941	0.022162	-0.00455875
														0.0215215	0.127784	0.0516153	0.0228801	-0.0042608
														0.0217718	0.129647	0.0526449	0.0236044	-0.00395835
														0.022022	0.131513	0.0536829	0.024335	-0.00365137
														0.0222723	0.133381	0.0547291	0.0250717	-0.00333987
														0.0225225	0.135252	0.0557835	0.0258146	-0.00302383
														0.0227728	0.137125	0.056846	0.0265636	-0.00270324
														0.023023	0.139001	0.0579166	0.0273186	-0.00237809
														0.0232733	0.140879	0.0589953	0.0280798	-0.00204837
														0.0235235	0.142759	0.0600819	0.0288469	-0.00171407
														0.0237738	0.144641	0.0611764	0.02962	-0.00137517
														0.024024	0.146525	0.0622787	0.0303991	-0.00103168
														0.0242743	0.14841	0.0633888	0.0311841	-0.000683575
														0.0245245	0.150298	0.0645066	0.0319749	-0.000330854
														0.0247748	0.152187	0.065632	0.0327716	2.64952e-05
														0.025025	0.154078	0.066765	0.0335742	0.00038848
														0.0252753	0.15597	0.0679055	0.0343825	0.000755108
														0.0255255	0.157864	0.0690534	0.0351966	0.00112639
														0.0257758	0.159759	0.0702088	0.0360163	0.00150233
														0.026026	0.161656	0.0713714	0.0368418	0.00188294
														0.0262763	0.163553	0.0725414	0.0376729	0.00226822
														0.0265265	0.165452	0.0737185	0.0385097	0.00265818
														0.0267768	0.167352	0.0749028	0.039352	0.00305283
														0.027027	0.169252	0.0760941	0.0401999	0.00345218
														0.0272773	0.171154	0.0772925	0.0410533	0.00385623
														0.0275275	0.173056	0.0784978	0.0419122	0.00426499
														0.0277778	0.174959	0.07971	0.0427766	0.00467846
														0.028028	0.176863	0.0809291	0.0436464	0.00509665
														0.0282783	0.178767	0.0821549	0.0445216	0.00551956
														0.0285285	0.180672	0.0833874	0.0454021	0.00594721
														0.0287788	0.182577	0.0846266	0.046288	0.00637959
														0.029029	0.184482	0.0858723	0.0471792	0.00681671
														0.0292793	0.186388	0.0871246	0.0480756	0.00725858
														0.0312813	0.201639	0.0883833	0.0489773	0.00770519
														0.0315315	0.203545	0.0896485	0.0498842	0.00815656
														0.0317818	0.20545	0.09092	0.0507963	0.00861269
														0.032032	0.207355	0.0921977	0.0517135	0.00907358
														0.0322823	0.20926	0.0934817	0.0526359	0.00953923
														0.0325325	0.211165	0.0947719	0.0535633	0.0100097
														0.0327828	0.213069	0.0960681	0.0544957	0.0104848
														0.033033	0.214972	0.0973704	0.0554332	0.0109648
														0.0332833	0.216875	0.0986787	0.0563756	0.0114496
														0.0335335	0.218777	0.0999929	0.0573231	0.0119391
														0.0337838	0.220678	0.101313	0.0582754	0.0124334
														0.034034	0.222579	0.102639	0.0592326	0.0129325
														0.0342843	0.224479	0.103971	0.0601947	0.0134364
														0.0345345	0.226378	0.105308	0.0611616	0.013945
														0.0347848	0.228276	0.106651	0.0621333	0.0144585
														0.035035	0.230173	0.107999	0.0631098	0.0149767
														0.0352853	0.232069	0.109353	0.064091	0.0154998
														0.0355355	0.233964	0.110713	0.065077	0.0160276
														0.0357858	0.235858	0.112078	0.0660676	0.0165602
														0.036036	0.237751	0.113448	0.0670628	0.0170976
														0.0362863	0.239643	0.114823	0.0680627	0.0176399
														0.0365365	0.241534	0.116204	0.0690671	0.0181869
														0.0367868	0.243423	0.11759	0.0700761	0.0187387
														0.037037	0.245311	0.118981	0.0710896	0.0192953
														0.0372873	0.247198	0.120377	0.0721076	0.0198566
														0.0375375	0.249084	0.121778	0.0731301	0.0204228
														0.0377878	0.250968	0.123184	0.074157	0.0209938
														0.038038	0.252851	0.124595	0.0751883	0.0215696
														0.0382883	0.254732	0.126011	0.076224	0.0221501
														0.0385385	0.256612	0.127431	0.077264	0.0227355
														0.0387888	0.25849	0.128856	0.0783083	0.0233256
														0.039039	0.260367	0.130286	0.0793569	0.0239205
														0.0392893	0.262242	0.13172	0.0804097	0.0245202
														0.0395395	0.264115	0.133159	0.0814668	0.0251247
														0.0397898	0.265987	0.134603	0.0825281	0.0257339
														0.04004	0.267857	0.136051	0.0835935	0.0263479
														0.0402903	0.269725	0.137503	0.084663	0.0269667
														0.0405405	0.271592	0.138959	0.0857367	0.0275903
														0.0407908	0.273457	0.14042	0.0868144	0.0282186
														0.041041	0.27532	0.141885	0.0878962	0.0288517
														0.0412913	0.277181	0.143355	0.0889819	0.0294896
														0.0415415	0.279041	0.144828	0.0900717	0.0301322
														0.0417918	0.280898	0.146305	0.0911654	0.0307796
														0.042042	0.282753	0.147787	0.092263	0.0314317
														0.0422923	0.284607	0.149272	0.0933645	0.0320886
														0.0425425	0.286459	0.150761	0.0944699	0.0327502
														0.0427928	0.288308	0.152254	0.0955791	0.0334165
														0.043043	0.290156	0.153751	0.0966922	0.0340876
														0.0432933	0.292001	0.155252	0.097809	0.0347633
														0.0435435	0.293845	0.156756	0.0989295	0.0354439
														0.0437938	0.295686	0.158264	0.100054	0.0361291
														0.044044	0.297525	0.159775	0.101182	0.036819
														0.0442943	0.299362	0.16129	0.102313	0.0375137
														0.0445445	0.301197	0.162809	0.103449	0.038213
														0.0447948	0.303029	0.164331	0.104587	0.038917
														0.045045	0.30486	0.165856	0.10573	0.0396257
														0.0452953	0.306688	0.167385	0.106876	0.0403391
														0.0455455	0.308514	0.168917	0.108025	0.0410572
														0.0457958	0.310337	0.170452	0.109178	0.0417799
														0.046046	0.312159	0.17199	0.110335	0.0425073
														0.0462963	0.313977	0.173531	0.111495	0.0432393
														0.0465465	0.315794	0.175076	0.112658	0.043976
														0.0467968	0.317608	0.176623	0.113825	0.0447174
														0.047047	0.31942	0.178174	0.114995	0.0454633
														0.0472973	0.321229	0.179727	0.116168	0.0462139
														0.0475475	0.323036	0.181283	0.117345	0.0469691
														0.0477978	0.324841	0.182842	0.118524	0.0477289
														0.048048	0.326643	0.184404	0.119708	0.0484933
														0.0482983	0.328443	0.185969	0.120894	0.0492623
														0.0485485	0.33024	0.187536	0.122083	0.0500359
														0.0487988	0.332034	0.189106	0.123276	0.050814
														0.049049	0.333826	0.190679	0.124472	0.0515967
														0.0492993	0.335616	0.192254	0.125671	0.052384
														0.0495495	0.337403	0.193831	0.126873	0.0531758
														0.0497998	0.339187	0.195411	0.128078	0.0539722
														0.05	0.340613	0.196994	0.129286	0.0547731
														0.0500501	0.340969	0.198578	0.130497	0.0555785
														0.0503003	0.342748	0.200165	0.13171	0.0563884
														0.0505506	0.344524	0.201755	0.132927	0.0572028
														0.0508008	0.346298	0.203346	0.134147	0.0580217
														0.0510511	0.348069	0.20494	0.13537	0.0588451
														0.0513013	0.349838	0.206536	0.136595	0.0596729
														0.0515516	0.351604	0.207814	0.137578	0.0603384
														0.0518018	0.353367	0.208134	0.137824	0.0605052
														0.0520521	0.355127	0.209734	0.139055	0.061342
														0.0523023	0.356885	0.211336	0.140289	0.0621832
														0.0525526	0.35864	0.21294	0.141525	0.0630288
														0.0528028	0.360392	0.214545	0.142765	0.0638788
														0.0530531	0.362142	0.216153	0.144007	0.0647333
														0.0533033	0.363889	0.217763	0.145252	0.0655921
														0.0535536	0.365633	0.219374	0.146499	0.0664553
														0.0538038	0.367374	0.220987	0.147749	0.0673229
														0.0540541	0.369112	0.222602	0.149001	0.0681948
														0.0543043	0.370848	0.224218	0.150257	0.0690711
														0.0545546	0.372581	0.225836	0.151514	0.0699518
														0.0548048	0.37431	0.227455	0.152774	0.0708367
														0.0550551	0.376038	0.229077	0.154037	0.071726
														0.0553053	0.377762	0.230699	0.155302	0.0726195
														0.0555556	0.379483	0.232323	0.15657	0.0735174
														0.0558058	0.381202	0.233948	0.15784	0.0744195
														0.0560561	0.382917	0.235575	0.159112	0.0753259
														0.0563063	0.38463	0.237203	0.160387	0.0762365
														0.0565566	0.38634	0.238833	0.161664	0.0771513
														0.0568068	0.388047	0.240463	0.162943	0.0780704
														0.0570571	0.389751	0.242095	0.164225	0.0789937
														0.0573073	0.391452	0.243728	0.165509	0.0799212
														0.0575576	0.39315	0.245362	0.166795	0.0808529
														0.0578078	0.394846	0.246997	0.168083	0.0817887
														0.0580581	0.396538	0.248634	0.169374	0.0827287
														0.0583083	0.398227	0.250271	0.170666	0.0836728
														0.0585586	0.399914	0.251909	0.171961	0.0846211
														0.0588088	0.401597	0.253548	0.173258	0.0855735
														0.0590591	0.403278	0.255188	0.174557	0.0865299
														0.0593093	0.404955	0.256829	0.175858	0.0874905
														0.0595596	0.40663	0.258471	0.177161	0.0884551
														0.0598098	0.408301	0.260114	0.178466	0.0894238
														0.0600601	0.40997	0.261757	0.179773	0.0903965
														0.0603103	0.411636	0.263401	0.181082	0.0913732
														0.0605606	0.413298	0.265045	0.182393	0.092354
														0.0608108	0.414958	0.266691	0.183706	0.0933387
														0.0610611	0.416615	0.268337	0.185021	0.0943275
														0.0613113	0.418268	0.269983	0.186337	0.0953201
														0.0615616	0.419919	0.27163	0.187656	0.0963168
														0.0618118	0.421566	0.273278	0.188976	0.0973174
														0.0620621	0.423211	0.274926	0.190298	0.0983219
														0.0623123	0.424852	0.276574	0.191622	0.0993303
														0.0625626	0.426491	0.278223	0.192947	0.100343
														0.0628128	0.428126	0.279872	0.194275	0.101359
														0.0630631	0.429759	0.281522	0.195604	0.102379
														0.0633133	0.431388	0.283172	0.196935	0.103403
														0.0635636	0.433014	0.284822	0.198267	0.10443
														0.0638138	0.434637	0.286472	0.199601	0.105462
														0.0640641	0.436258	0.288123	0.200937	0.106497
														0.0643143	0.437875	0.289773	0.202274	0.107536
														0.0645646	0.439489	0.302981	0.203612	0.108579
														0.0648148	0.4411	0.304632	0.204953	0.109625
														0.0650651	0.442708	0.306283	0.206295	0.110676
														0.0653153	0.444313	0.307933	0.207638	0.11173
														0.0655656	0.445915	0.309584	0.208983	0.112787
														0.0658158	0.447513	0.311234	0.210329	0.113849
														0.0660661	0.449109	0.312883	0.211677	0.114914
														0.0663163	0.450702	0.314533	0.213026	0.115982
														0.0665666	0.452291	0.316182	0.214376	0.117055
														0.0668168	0.453878	0.317831	0.215728	0.118131
														0.0670671	0.455461	0.31948	0.217081	0.11921
														0.0673173	0.457041	0.321128	0.218436	0.120293
														0.0675676	0.458618	0.322776	0.219792	0.12138
														0.0678178	0.460193	0.324423	0.221149	0.12247
														0.0680681	0.461764	0.32607	0.222507	0.123564
														0.0683183	0.463332	0.327716	0.223867	0.124661
														0.0685686	0.464897	0.329362	0.225228	0.125761
														0.0688188	0.466458	0.331007	0.22659	0.126866
														0.0690691	0.468017	0.332651	0.227953	0.127973
														0.0693193	0.469573	0.334295	0.229317	0.129084
														0.0695696	0.471125	0.335939	0.230683	0.130199
														0.0698198	0.472675	0.337581	0.232049	0.131316
														0.0700701	0.474221	0.339223	0.233417	0.132438
														0.0703203	0.475764	0.340865	0.234786	0.133562
														0.0705706	0.477305	0.342505	0.236156	0.13469
														0.0708208	0.478842	0.344145	0.237526	0.135821
														0.0710711	0.480376	0.345784	0.238898	0.136956
														0.0713213	0.481907	0.347422	0.240271	0.138093
														0.0715716	0.483435	0.34906	0.241645	0.139234
														0.0718218	0.484959	0.350696	0.24302	0.140379
														0.0720721	0.486481	0.352332	0.244396	0.141526
														0.0723223	0.488	0.353967	0.245772	0.142677
														0.0725726	0.489515	0.355601	0.24715	0.143831
														0.0728228	0.491028	0.357233	0.248528	0.144988
														0.0730731	0.492537	0.358865	0.249907	0.146148
														0.0733233	0.494044	0.360496	0.251287	0.147312
														0.0735736	0.495547	0.362126	0.252668	0.148478
														0.0738238	0.497047	0.363755	0.25405	0.149648
														0.0740741	0.498544	0.365383	0.255433	0.15082
														0.0743243	0.500038	0.36701	0.256816	0.151996
														0.0745746	0.501529	0.368635	0.2582	0.153175
														0.0748248	0.503017	0.37026	0.259584	0.154357
														0.0750751	0.504502	0.371883	0.26097	0.155541
														0.0753253	0.505984	0.373505	0.262356	0.156729
														0.0755756	0.507462	0.375126	0.263743	0.15792
														0.0758258	0.508938	0.376746	0.26513	0.159114
														0.0760761	0.510411	0.378365	0.266518	0.16031
														0.0763263	0.51188	0.379982	0.267907	0.16151
														0.0765766	0.513347	0.381598	0.269296	0.162712
														0.0768268	0.51481	0.383213	0.270686	0.163917
														0.0770771	0.516271	0.384827	0.272076	0.165125
														0.0773273	0.517728	0.386439	0.273467	0.166336
														0.0775776	0.519182	0.38805	0.274858	0.16755
														0.0778278	0.520634	0.389659	0.27625	0.168766
														0.0780781	0.522082	0.391267	0.277643	0.169986
														0.0783283	0.523527	0.392874	0.279036	0.171208
														0.0785786	0.524969	0.394479	0.280429	0.172432
														0.0788288	0.526408	0.396083	0.281823	0.17366
														0.0790791	0.527844	0.397686	0.283217	0.17489
														0.0793293	0.529278	0.399287	0.284611	0.176123
														0.0795796	0.530708	0.400886	0.286006	0.177358
														0.0798298	0.532135	0.402484	0.287402	0.178596
														0.0800801	0.533559	0.404081	0.288797	0.179837
														0.0803303	0.53498	0.405676	0.290193	0.18108
														0.0805806	0.536398	0.407269	0.29159	0.182326
														0.0808308	0.537813	0.408861	0.292986	0.183574
														0.0810811	0.539225	0.410451	0.294383	0.184825
														0.0813313	0.540634	0.41204	0.29578	0.186079
														0.0815816	0.54204	0.413627	0.297178	0.187335
														0.0818318	0.543443	0.415212	0.298575	0.188593
														0.0820821	0.544843	0.416796	0.299973	0.189854
														0.0823323	0.54624	0.418378	0.301371	0.191117
														0.0825826	0.547634	0.419959	0.30277	0.192383
														0.0828328	0.549025	0.421537	0.304168	0.193651
														0.0830831	0.550413	0.423114	0.305567	0.194921
														0.0833333	0.551798	0.42469	0.306965	0.196194
														0.0835836	0.553181	0.426263	0.308364	0.197469
														0.0838338	0.55456	0.427835	0.309763	0.198746
														0.0840841	0.555936	0.429405	0.311162	0.200026
														0.0843343	0.557309	0.430974	0.312561	0.201308
														0.0845846	0.55868	0.43254	0.323755	0.202592
														0.0848348	0.560047	0.434105	0.325154	0.203878
														0.0850851	0.561412	0.435668	0.326553	0.205167
														0.0853353	0.562773	0.437229	0.327952	0.206457
														0.0855856	0.564132	0.438788	0.329351	0.20775
														0.0858358	0.565487	0.440346	0.33075	0.209045
														0.0860861	0.56684	0.441901	0.332148	0.210343
														0.0863363	0.56819	0.443455	0.333547	0.211642
														0.0865866	0.569537	0.445007	0.334945	0.212943
														0.0868368	0.570881	0.446556	0.336343	0.214247
														0.0870871	0.572222	0.448104	0.337741	0.215552
														0.0873373	0.57356	0.44965	0.339139	0.21686
														0.0875876	0.574895	0.451194	0.340537	0.218169
														0.0878378	0.576228	0.452737	0.341934	0.219481
														0.0880881	0.577557	0.454277	0.343331	0.220794
														0.0883383	0.578884	0.455815	0.344728	0.22211
														0.0885886	0.580208	0.457351	0.346125	0.223427
														0.0888388	0.581529	0.458885	0.347521	0.224746
														0.0890891	0.582847	0.460418	0.348917	0.226067
														0.0893393	0.584162	0.461948	0.350313	0.22739
														0.0895896	0.585474	0.463476	0.351708	0.228715
														0.0898398	0.586783	0.465002	0.353103	0.230042
														0.0900901	0.58809	0.466526	0.354498	0.23137
														0.0903403	0.589393	0.468048	0.355892	0.2327
														0.0905906	0.590694	0.469568	0.357286	0.234032
														0.0908408	0.591992	0.471086	0.35868	0.235366
														0.0910911	0.593287	0.472602	0.360073	0.236701
														0.0913413	0.59458	0.474115	0.361466	0.238038
														0.0915916	0.595869	0.475627	0.362858	0.239377
														0.0918418	0.597156	0.477136	0.36425	0.240718
														0.0920921	0.59844	0.478644	0.365642	0.24206
														0.0923423	0.599721	0.480149	0.367033	0.243403
														0.0925926	0.600999	0.481652	0.368424	0.244749
														0.0928428	0.602275	0.483153	0.369814	0.246096
														0.0930931	0.603547	0.484652	0.371204	0.247444
														0.0933433	0.604817	0.486148	0.372593	0.248794
														0.0935936	0.606084	0.487643	0.373981	0.250146
														0.0938438	0.607348	0.489135	0.37537	0.251499
														0.0940941	0.60861	0.490625	0.376757	0.252853
														0.0943443	0.609869	0.492113	0.378144	0.254209
														0.0945946	0.611125	0.493598	0.379531	0.255567
														0.0948448	0.612378	0.495082	0.380917	0.256925
														0.0950951	0.613628	0.496563	0.382302	0.258286
														0.0953453	0.614876	0.498042	0.383687	0.259647
														0.0955956	0.616121	0.499519	0.385071	0.26101
														0.0958458	0.617363	0.500993	0.386455	0.262375
														0.0960961	0.618603	0.502465	0.387838	0.26374
														0.0963463	0.619839	0.503935	0.38922	0.265107
														0.0965966	0.621073	0.505403	0.390602	0.266476
														0.0968468	0.622305	0.506868	0.391983	0.267845
														0.0970971	0.623533	0.508332	0.393363	0.269216
														0.0973473	0.624759	0.509792	0.394743	0.270588
														0.0975976	0.625982	0.511251	0.396122	0.271961
														0.0978478	0.627203	0.512707	0.3975	0.273336
														0.0980981	0.62842	0.514161	0.398878	0.274711
														0.0983483	0.629635	0.515613	0.400255	0.276088
														0.0985986	0.630848	0.517062	0.401631	0.277466
														0.0988488	0.632058	0.518509	0.403006	0.278845
														0.0990991	0.633265	0.519954	0.404381	0.280225
														0.0993493	0.634469	0.521396	0.405755	0.281606
														0.0995996	0.635671	0.522836	0.407128	0.282988
														0.0998498	0.63687	0.524274	0.4085	0.284372
														0.1	0.637588	0.525135	0.409323	0.285756
														0.1001	0.638066	0.525709	0.409872	0.287141
														0.10035	0.63926	0.527142	0.411243	0.288527
														0.100601	0.640451	0.528573	0.412613	0.289915
														0.100851	0.64164	0.530001	0.413982	0.291303
														0.101101	0.642825	0.531427	0.41535	0.292692
														0.101351	0.644009	0.532851	0.416718	0.294082
														0.101602	0.645189	0.534272	0.418085	0.294916
														0.101852	0.646367	0.53569	0.419451	0.295473
														0.102102	0.647543	0.537107	0.420816	0.296864
														0.102352	0.648715	0.538521	0.42218	0.298257
														0.102603	0.649886	0.539932	0.423543	0.299651
														0.102853	0.651053	0.541342	0.424906	0.301045
														0.103103	0.652218	0.542748	0.426267	0.30244
														0.103353	0.653381	0.544153	0.427628	0.303836
														0.103604	0.65454	0.545555	0.428987	0.305232
														0.103854	0.655698	0.546954	0.430346	0.30663
														0.104104	0.656852	0.548351	0.431704	0.308028
														0.104354	0.658005	0.549746	0.433061	0.309427
														0.104605	0.659154	0.551138	0.434417	0.310826
														0.104855	0.660301	0.552528	0.435772	0.312226
														0.105105	0.661446	0.553916	0.437126	0.313627
														0.105355	0.662588	0.555301	0.438479	0.315028
														0.105606	0.663727	0.556683	0.439831	0.31643
														0.105856	0.664864	0.558064	0.441183	0.317833
														0.106106	0.665998	0.559441	0.442533	0.319236
														0.106356	0.66713	0.560816	0.443882	0.32064
														0.106607	0.668259	0.562189	0.44523	0.322044
														0.106857	0.669386	0.56356	0.446577	0.323449
														0.107107	0.670511	0.564927	0.447923	0.324855
														0.107357	0.671633	0.566293	0.449269	0.326261
														0.107608	0.672752	0.567656	0.450613	0.327667
														0.107858	0.673869	0.569016	0.451956	0.329074
														0.108108	0.674983	0.570375	0.453298	0.330481
														0.108358	0.676095	0.57173	0.454639	0.331889
														0.108609	0.677205	0.573083	0.455978	0.333297
														0.108859	0.678312	0.574434	0.457317	0.334705
														0.109109	0.679416	0.575782	0.458655	0.336114
														0.109359	0.680518	0.577128	0.459992	0.337523
														0.10961	0.681618	0.578471	0.461327	0.338933
														0.10986	0.682715	0.579812	0.462662	0.340343
														0.11011	0.68381	0.58115	0.463995	0.341753
														0.11036	0.684902	0.582486	0.465327	0.343164
														0.110611	0.685992	0.583819	0.466658	0.344574
														0.110861	0.68708	0.58515	0.467988	0.345985
														0.111111	0.688165	0.586479	0.469317	0.347397
														0.111361	0.689247	0.587804	0.470645	0.348808
														0.111612	0.690328	0.589128	0.471971	0.35022
														0.111862	0.691406	0.590449	0.473297	0.351632
														0.112112	0.692481	0.591767	0.474621	0.353044
														0.112362	0.693554	0.593083	0.475944	0.354456
														0.112613	0.694625	0.594397	0.477266	0.355868
														0.112863	0.695693	0.595708	0.478587	0.357281
														0.113113	0.696759	0.597016	0.479906	0.358694
														0.113363	0.697823	0.598322	0.481224	0.360106
														0.113614	0.698884	0.599626	0.482542	0.361519
														0.113864	0.699943	0.600927	0.483858	0.372823
														0.114114	0.701	0.602225	0.485172	0.374236
														0.114364	0.702054	0.603521	0.486486	0.375648
														0.114615	0.703106	0.604815	0.487798	0.377061
														0.114865	0.704155	0.606106	0.489109	0.378474
														0.115115	0.705203	0.607394	0.490419	0.379886
														0.115365	0.706248	0.60868	0.491728	0.381298
														0.115616	0.70729	0.609964	0.493035	0.382711
														0.115866	0.70833	0.611245	0.494341	0.384123
														0.116116	0.709368	0.612524	0.495646	0.385535
														0.116366	0.710404	0.6138	0.49695	0.386946
														0.116617	0.711438	0.615073	0.498252	0.388358
														0.116867	0.712469	0.616344	0.499553	0.389769
														0.117117	0.713498	0.617613	0.500853	0.39118
														0.117367	0.714524	0.618879	0.502152	0.392591
														0.117618	0.715548	0.620143	0.503449	0.394001
														0.117868	0.71657	0.621404	0.504745	0.395412
														0.118118	0.71759	0.622663	0.50604	0.396822
														0.118368	0.718608	0.623919	0.507333	0.398231
														0.118619	0.719623	0.625172	0.508625	0.399641
														0.118869	0.720636	0.626424	0.509916	0.40105
														0.119119	0.721647	0.627672	0.511205	0.402458
														0.119369	0.722655	0.628918	0.512493	0.403867
														0.11962	0.723662	0.630162	0.51378	0.405274
														0.11987	0.724666	0.631403	0.515066	0.406682
														0.12	0.725187	0.632048	0.515734	0.407414
														0.12012	0.725668	0.632642	0.51635	0.408089
														0.12037	0.726667	0.633878	0.517633	0.409496
														0.120621	0.727665	0.635112	0.518914	0.410902
														0.120871	0.72866	0.636344	0.520194	0.412308
														0.121121	0.729653	0.637572	0.521473	0.413713
														0.121371	0.730644	0.638799	0.522751	0.415118
														0.121622	0.731633	0.640023	0.524027	0.416523
														0.121872	0.732619	0.641244	0.525301	0.417927
														0.122122	0.733604	0.642463	0.526575	0.41933
														0.122372	0.734586	0.643679	0.527847	0.420733
														0.122623	0.735566	0.644893	0.529117	0.422136
														0.122873	0.736544	0.646105	0.530387	0.423538
														0.123123	0.737519	0.647314	0.531654	0.424939
														0.123373	0.738493	0.64852	0.532921	0.42634
														0.123624	0.739464	0.649724	0.534186	0.42774
														0.123874	0.740434	0.650926	0.53545	0.42914
														0.124124	0.741401	0.652125	0.536712	0.430539
														0.124374	0.742366	0.653322	0.537973	0.431937
														0.124625	0.743329	0.654516	0.539232	0.433335
														0.124875	0.744289	0.655708	0.54049	0.434732
														0.125125	0.745248	0.656897	0.541747	0.436128
														0.125375	0.746205	0.658084	0.543002	0.437524
														0.125626	0.747159	0.659269	0.544256	0.438919
														0.125876	0.748112	0.660451	0.545509	0.440314
														0.126126	0.749062	0.66163	0.54676	0.441707
														0.126376	0.75001	0.662807	0.548009	0.4431
														0.126627	0.750956	0.663982	0.549257	0.444493
														0.126877	0.7519	0.665154	0.550504	0.445884
														0.127127	0.752842	0.666324	0.551749	0.447275
														0.127377	0.753782	0.667491	0.552993	0.448665
														0.127628	0.75472	0.668656	0.554235	0.450054
														0.127878	0.755656	0.669818	0.555476	0.451443
														0.128128	0.756589	0.670978	0.556716	0.452831
														0.128378	0.757521	0.672136	0.557954	0.454218
														0.128629	0.758451	0.673291	0.55919	0.455604
														0.128879	0.759378	0.674444	0.560425	0.456989
														0.129129	0.760304	0.675594	0.561659	0.458373
														0.129379	0.761227	0.676742	0.562891	0.459757
														0.12963	0.762149	0.677888	0.564122	0.46114
														0.12988	0.763069	0.679031	0.565351	0.462522
														0.13013	0.763986	0.680171	0.566579	0.463903
														0.13038	0.764902	0.68131	0.567805	0.465283
														0.130631	0.765815	0.682445	0.56903	0.466662
														0.130881	0.766727	0.683579	0.570253	0.46804
														0.131131	0.767636	0.68471	0.571475	0.469418
														0.131381	0.768544	0.685838	0.572695	0.470794
														0.131632	0.769449	0.686965	0.573914	0.47217
														0.131882	0.770353	0.688089	0.575131	0.473544
														0.132132	0.771254	0.68921	0.576347	0.474918
														0.132382	0.772154	0.690329	0.577561	0.476291
														0.132633	0.773052	0.691446	0.578774	0.477662
														0.132883	0.773948	0.69256	0.579985	0.479033
														0.133133	0.774841	0.693672	0.581195	0.480403
														0.133383	0.775733	0.694781	0.582404	0.481771
														0.133634	0.776623	0.695889	0.58361	0.483139
														0.133884	0.777511	0.696993	0.584816	0.484506
														0.134134	0.778397	0.698096	0.58602	0.485871
														0.134384	0.779281	0.699196	0.587222	0.487236
														0.134635	0.780164	0.700294	0.588423	0.488599
														0.134885	0.781044	0.701389	0.589622	0.489962
														0.135135	0.781922	0.702482	0.59082	0.491323
														0.135385	0.782799	0.703573	0.592016	0.492683
														0.135636	0.783673	0.704661	0.59321	0.494043
														0.135886	0.784546	0.705747	0.594404	0.495401
														0.136136	0.785417	0.70683	0.595595	0.496758
														0.136386	0.786286	0.707912	0.596785	0.498114
														0.136637	0.787153	0.708991	0.597974	0.499468
														0.136887	0.788018	0.710067	0.599161	0.500822
														0.137137	0.788881	0.711141	0.600346	0.502174
														0.137387	0.789742	0.712213	0.60153	0.503526
														0.137638	0.790602	0.713283	0.602713	0.504876
														0.137888	0.79146	0.71435	0.603893	0.506225
														0.138138	0.792316	0.715415	0.605073	0.507573
														0.138388	0.793169	0.716478	0.606251	0.508919
														0.138639	0.794022	0.717538	0.607427	0.510265
														0.138889	0.794872	0.718596	0.608601	0.511609
														0.139139	0.79572	0.719652	0.609775	0.512952
														0.139389	0.796567	0.720705	0.610946	0.514294
														0.13964	0.797412	0.721756	0.612116	0.515634
														0.13989	0.798255	0.722805	0.613285	0.516973
														0.14014	0.799096	0.723852	0.614452	0.518311
														0.14039	0.799935	0.724896	0.615617	0.519648
														0.140641	0.800773	0.725938	0.616781	0.520984
														0.140891	0.801609	0.726978	0.617943	0.522318
														0.141141	0.802443	0.728015	0.619104	0.523651
														0.141391	0.803275	0.72905	0.620263	0.524983
														0.141642	0.804105	0.730083	0.62142	0.526313
														0.141892	0.804934	0.731114	0.622576	0.527643
														0.142142	0.805761	0.732142	0.623731	0.528971
														0.142392	0.806586	0.733168	0.624884	0.530297
														0.142643	0.807409	0.734192	0.626035	0.531622
														0.142893	0.80823	0.735214	0.627185	0.532946
														0.143143	0.80905	0.736233	0.628333	0.534269
														0.143393	0.809868	0.73725	0.629479	0.53559
														0.143644	0.810684	0.738265	0.630625	0.53691
														0.143894	0.811499	0.739277	0.631768	0.538229
														0.144144	0.812312	0.740288	0.63291	0.539546
														0.144394	0.813123	0.741296	0.63405	0.540862
														0.144645	0.813932	0.742302	0.635189	0.542176
														0.144895	0.814739	0.743306	0.636326	0.543489
														0.145145	0.815545	0.744307	0.637462	0.544801
														0.145395	0.816349	0.745306	0.638596	0.546111
														0.145646	0.817152	0.746303	0.639728	0.54742
														0.145896	0.817952	0.747298	0.640859	0.548728
														0.146146	0.818751	0.748291	0.641988	0.550034
														0.146396	0.819548	0.749281	0.643116	0.551339
														0.146647	0.820344	0.75027	0.644242	0.552642
														0.146897	0.821138	0.751256	0.645367	0.553944
														0.147147	0.82193	0.75224	0.64649	0.555244
														0.147397	0.822721	0.753221	0.647611	0.556543
														0.147648	0.823509	0.754201	0.648731	0.557841
														0.147898	0.824296	0.755178	0.649849	0.559137
														0.148148	0.825082	0.756153	0.650966	0.560431
														0.148398	0.825866	0.757126	0.652081	0.561724
														0.148649	0.826648	0.758097	0.653195	0.563016
														0.148899	0.827428	0.759066	0.654306	0.564306
														0.149149	0.828207	0.760032	0.655417	0.565595
														0.149399	0.828984	0.760997	0.656526	0.566882
														0.14965	0.82976	0.761959	0.657633	0.568168
														0.1499	0.830534	0.762919	0.658738	0.569452
														0.15	0.830843	0.763302	0.65918	0.569966
														0.15015	0.831306	0.763877	0.659842	0.570735
														0.1504	0.832076	0.764833	0.660945	0.572016
														0.150651	0.832845	0.765786	0.662046	0.573296
														0.150901	0.833613	0.766738	0.663145	0.574574
														0.151151	0.834378	0.767687	0.664243	0.575851
														0.151401	0.835143	0.768635	0.665339	0.577126
														0.151652	0.835905	0.76958	0.666433	0.5784
														0.151902	0.836666	0.770523	0.667526	0.579672
														0.152152	0.837425	0.771464	0.668617	0.580942
														0.152402	0.838183	0.772403	0.669707	0.582211
														0.152653	0.838939	0.773339	0.670795	0.583479
														0.152903	0.839693	0.774274	0.671882	0.584745
														0.153153	0.840446	0.775207	0.672967	0.586009
														0.153403	0.841198	0.776137	0.67405	0.587272
														0.153654	0.841947	0.777065	0.675132	0.588533
														0.153904	0.842695	0.777992	0.676212	0.589793
														0.154154	0.843442	0.778916	0.677291	0.591051
														0.154404	0.844187	0.779838	0.678368	0.592307
														0.154655	0.84493	0.780758	0.679443	0.593562
														0.154905	0.845672	0.781676	0.680517	0.594816
														0.155155	0.846413	0.782592	0.68159	0.596067
														0.155405	0.847151	0.783506	0.68266	0.597317
														0.155656	0.847889	0.784418	0.68373	0.598566
														0.155906	0.848624	0.785328	0.684797	0.599813
														0.156156	0.849358	0.786235	0.685863	0.601058
														0.156406	0.850091	0.787141	0.686927	0.602302
														0.156657	0.850822	0.788045	0.68799	0.603544
														0.156907	0.851552	0.788946	0.689052	0.604784
														0.157157	0.85228	0.789846	0.690111	0.606023
														0.157407	0.853006	0.790744	0.691169	0.60726
														0.157658	0.853731	0.791639	0.692226	0.608496
														0.157908	0.854455	0.792533	0.693281	0.609729
														0.158158	0.855177	0.793424	0.694334	0.610962
														0.158408	0.855897	0.794314	0.695386	0.612192
														0.158659	0.856616	0.795201	0.696436	0.613421
														0.158909	0.857333	0.796087	0.697484	0.614649
														0.159159	0.858049	0.79697	0.698532	0.615874
														0.159409	0.858764	0.797852	0.699577	0.617098
														0.15966	0.859477	0.798732	0.700621	0.61832
														0.15991	0.860188	0.799609	0.701663	0.619541
														0.16016	0.860898	0.800485	0.702704	0.62076
														0.16041	0.861607	0.801358	0.703743	0.621977
														0.160661	0.862314	0.80223	0.70478	0.623193
														0.160911	0.86302	0.8031	0.705816	0.624407
														0.161161	0.863724	0.803967	0.706851	0.625619
														0.161411	0.864426	0.804833	0.707884	0.62683
														0.161662	0.865128	0.805697	0.708915	0.628039
														0.161912	0.865827	0.806559	0.709945	0.629246
														0.162162	0.866526	0.807419	0.710973	0.630451
														0.162412	0.867223	0.808277	0.711999	0.631655
														0.162663	0.867918	0.809133	0.713024	0.632857
														0.162913	0.868612	0.809987	0.714048	0.634058
														0.163163	0.869305	0.810839	0.71507	0.635256
														0.163413	0.869996	0.811689	0.71609	0.636453
														0.163664	0.870685	0.812538	0.717109	0.637649
														0.163914	0.871374	0.813384	0.718126	0.638842
														0.164164	0.872061	0.814229	0.719141	0.640034
														0.164414	0.872746	0.815071	0.720155	0.641224
														0.164665	0.87343	0.815912	0.721168	0.642413
														0.164915	0.874113	0.816751	0.722179	0.643599
														0.165165	0.874794	0.817588	0.723188	0.644784
														0.165415	0.875474	0.818423	0.724196	0.645968
														0.165666	0.876152	0.819256	0.725202	0.647149
														0.165916	0.876829	0.820087	0.726207	0.648329
														0.166166	0.877505	0.820916	0.72721	0.649507
														0.166416	0.878179	0.821744	0.728211	0.650683
														0.166667	0.878852	0.822569	0.729211	0.651858
														0.166917	0.879524	0.823393	0.73021	0.653031
														0.167167	0.880194	0.824215	0.731207	0.654202
														0.167417	0.880863	0.825035	0.732202	0.655371
														0.167668	0.88153	0.825853	0.733196	0.656539
														0.167918	0.882196	0.826669	0.734188	0.657705
														0.168168	0.882861	0.827484	0.735179	0.658869
														0.168418	0.883524	0.828296	0.736168	0.660031
														0.168669	0.884186	0.829107	0.737155	0.661192
														0.168919	0.884847	0.829916	0.738141	0.662351
														0.169169	0.885506	0.830723	0.739126	0.663508
														0.169419	0.886164	0.831529	0.740109	0.664663
														0.16967	0.88682	0.832332	0.74109	0.665817
														0.16992	0.887476	0.833134	0.74207	0.666969
														0.17017	0.88813	0.833933	0.743048	0.668119
														0.17042	0.888782	0.834732	0.744025	0.669267
														0.170671	0.889433	0.835528	0.745	0.670414
														0.170921	0.890083	0.836322	0.745974	0.671559
														0.171171	0.890732	0.837115	0.746946	0.672702
														0.171421	0.891379	0.837906	0.747917	0.673843
														0.171672	0.892025	0.838695	0.748886	0.674982
														0.171922	0.89267	0.839482	0.749853	0.67612
														0.172172	0.893313	0.840267	0.750819	0.677256
														0.172422	0.893955	0.841051	0.751784	0.67839
														0.172673	0.894596	0.841833	0.752747	0.679523
														0.172923	0.895236	0.842613	0.753708	0.680653
														0.173173	0.895874	0.843391	0.754668	0.681782
														0.173423	0.896511	0.844168	0.755626	0.682909
														0.173674	0.897146	0.844943	0.756583	0.684034
														0.173924	0.89778	0.845716	0.757539	0.685158
														0.174174	0.898413	0.846487	0.758492	0.68628
														0.174424	0.899045	0.847257	0.759445	0.6874
														0.174675	0.899676	0.848025	0.760396	0.688518
														0.174925	0.900305	0.848791	0.761345	0.689634
														0.175175	0.900933	0.849555	0.762293	0.690749
														0.175425	0.90156	0.850318	0.763239	0.691861
														0.175676	0.902185	0.851079	0.764183	0.692972
														0.175926	0.902809	0.851838	0.765127	0.694082
														0.176176	0.903432	0.852595	0.766068	0.695189
														0.176426	0.904054	0.853351	0.767009	0.696295
														0.176677	0.904674	0.854105	0.767947	0.697399
														0.176927	0.905293	0.854858	0.768884	0.698501
														0.177177	0.905911	0.855608	0.76982	0.699601
														0.177427	0.906528	0.856357	0.770754	0.7007
														0.177678	0.907143	0.857105	0.771687	0.701796
														0.177928	0.907758	0.85785	0.772618	0.702891
														0.178178	0.908371	0.858594	0.773548	0.703984
														0.178428	0.908982	0.859336	0.774476	0.705076
														0.178679	0.909593	0.860077	0.775402	0.706165
														0.178929	0.910202	0.860816	0.776328	0.707253
														0.179179	0.91081	0.861553	0.777251	0.708339
														0.179429	0.911417	0.862288	0.778173	0.709423
														0.17968	0.912023	0.863022	0.779094	0.710506
														0.17993	0.912627	0.863754	0.780013	0.711586
														0.18018	0.913231	0.864485	0.780931	0.712665
														0.18043	0.913833	0.865214	0.781847	0.713742
														0.180681	0.914433	0.865941	0.782762	0.714817
														0.180931	0.915033	0.866667	0.783675	0.715891
														0.181181	0.915632	0.867391	0.784587	0.716962
														0.181431	0.916229	0.868113	0.785497	0.718032
														0.181682	0.916825	0.868834	0.786406	0.7191
														0.181932	0.91742	0.869553	0.787313	0.720166
														0.182182	0.918014	0.87027	0.788219	0.721231
														0.182432	0.918606	0.870986	0.789124	0.722293
														0.182683	0.919198	0.8717	0.790027	0.723354
														0.182933	0.919788	0.872413	0.790928	0.724413
														0.183183	0.920377	0.873124	0.791828	0.725471
														0.183433	0.920965	0.873833	0.792727	0.726526
														0.183684	0.921552	0.874541	0.793624	0.72758
														0.183934	0.922137	0.875247	0.794519	0.728632
														0.184184	0.922722	0.875952	0.795413	0.729682
														0.184434	0.923305	0.876655	0.796306	0.73073
														0.184685	0.923887	0.877356	0.797197	0.731777
														0.184935	0.924468	0.878056	0.798087	0.732821
														0.185185	0.925048	0.878754	0.798975	0.733864
														0.185435	0.925626	0.879451	0.799862	0.734905
														0.185686	0.926204	0.880146	0.800747	0.735945
														0.185936	0.92678	0.88084	0.801631	0.736982
														0.186186	0.927356	0.881532	0.802514	0.738018
														0.186436	0.92793	0.882222	0.803395	0.739052
														0.186687	0.928503	0.882911	0.804274	0.740084
														0.186937	0.929075	0.883599	0.805153	0.741115
														0.187187	0.929645	0.884284	0.806029	0.742143
														0.187437	0.930215	0.884969	0.806905	0.74317
														0.187688	0.930784	0.885651	0.807778	0.744195
														0.187938	0.931351	0.886332	0.808651	0.745219
														0.188188	0.931917	0.887012	0.809522	0.74624
														0.188438	0.932483	0.88769	0.810391	0.74726
														0.188689	0.933047	0.888367	0.811259	0.748278
														0.188939	0.93361	0.889042	0.812126	0.749294
														0.189189	0.934172	0.889715	0.812991	0.750308
														0.189439	0.934732	0.890387	0.813855	0.751321
														0.18969	0.935292	0.891058	0.814717	0.752332
														0.18994	0.935851	0.891727	0.815578	0.753341
														0.19019	0.936408	0.892394	0.816438	0.754348
														0.19044	0.936965	0.89306	0.817296	0.755353
														0.190691	0.93752	0.893725	0.818153	0.756357
														0.190941	0.938074	0.894388	0.819008	0.757359
														0.191191	0.938627	0.895049	0.819862	0.758359
														0.191441	0.93918	0.89571	0.820714	0.759357
														0.191692	0.939731	0.896368	0.821565	0.760354
														0.191942	0.940281	0.897025	0.822415	0.761349
														0.192192	0.94083	0.897681	0.823263	0.762342
														0.192442	0.941377	0.898335	0.82411	0.763333
														0.192693	0.941924	0.898988	0.824955	0.764323
														0.192943	0.94247	0.899639	0.825799	0.76531
														0.193193	0.943015	0.900289	0.826642	0.766296
														0.193443	0.943558	0.900937	0.827483	0.76728
														0.193694	0.944101	0.901584	0.828323	0.768263
														0.193944	0.944642	0.902229	0.829161	0.769244
														0.194194	0.945183	0.902873	0.829998	0.770222
														0.194444	0.945722	0.903516	0.830834	0.7712
														0.194695	0.946261	0.904157	0.831668	0.772175
														0.194945	0.946798	0.904796	0.832501	0.773149
														0.195195	0.947334	0.905435	0.833333	0.774121
														0.195445	0.94787	0.906071	0.834163	0.775091
														0.195696	0.948404	0.906707	0.834991	0.776059
														0.195946	0.948937	0.907341	0.835819	0.777026
														0.196196	0.949469	0.907973	0.836645	0.77799
														0.196446	0.950001	0.908604	0.837469	0.778954
														0.196697	0.950531	0.909234	0.838292	0.779915
														0.196947	0.95106	0.909862	0.839114	0.780874
														0.197197	0.951588	0.910489	0.839935	0.781832
														0.197447	0.952115	0.911115	0.840754	0.782788
														0.197698	0.952641	0.911739	0.841571	0.783743
														0.197948	0.953166	0.912362	0.842388	0.784695
														0.198198	0.953691	0.912983	0.843203	0.785646
														0.198448	0.954214	0.913603	0.844016	0.786595
														0.198699	0.954736	0.914221	0.844829	0.787543
														0.198949	0.955257	0.914839	0.84564	0.788488
														0.199199	0.955777	0.915454	0.846449	0.789432
														0.199449	0.956296	0.916069	0.847257	0.790375
														0.1997	0.956814	0.916682	0.848064	0.791315
														0.19995	0.957331	0.917294	0.84887	0.792254
														0.2	0.957435	0.917416	0.849031	0.792441
														0.2002	0.957848	0.917904	0.849674	0.793191
														0.20045	0.958363	0.918513	0.850477	0.794126
														0.200701	0.958877	0.919121	0.851278	0.79506
														0.200951	0.95939	0.919727	0.852078	0.795991
														0.201201	0.959902	0.920332	0.852877	0.796921
														0.201451	0.960414	0.920935	0.853675	0.79785
														0.201702	0.960924	0.921538	0.854471	0.798776
														0.201952	0.961433	0.922138	0.855265	0.799701
														0.202202	0.961942	0.922738	0.856059	0.800625
														0.202452	0.962449	0.923336	0.856851	0.801546
														0.202703	0.962956	0.923933	0.857642	0.802466
														0.202953	0.963461	0.924529	0.858431	0.803384
														0.203203	0.963966	0.925123	0.859219	0.8043
														0.203453	0.964469	0.925716	0.860006	0.805215
														0.203704	0.964972	0.926308	0.860792	0.806128
														0.203954	0.965474	0.926898	0.861576	0.807039
														0.204204	0.965974	0.927487	0.862359	0.807949
														0.204454	0.966474	0.928075	0.86314	0.808856
														0.204705	0.966973	0.928661	0.86392	0.809763
														0.204955	0.967471	0.929246	0.864699	0.810667
														0.205205	0.967968	0.92983	0.865477	0.81157
														0.205455	0.968464	0.930412	0.866253	0.812471
														0.205706	0.968959	0.930994	0.867028	0.81337
														0.205956	0.969453	0.931574	0.867802	0.814268
														0.206206	0.969946	0.932152	0.868574	0.815164
														0.206456	0.970439	0.93273	0.869345	0.816058
														0.206707	0.97093	0.933306	0.870115	0.816951
														0.206957	0.971421	0.933881	0.870884	0.817841
														0.207207	0.97191	0.934454	0.871651	0.818731
														0.207457	0.972399	0.935026	0.872417	0.819618
														0.207708	0.972887	0.935598	0.873181	0.820504
														0.207958	0.973373	0.936167	0.873945	0.821388
														0.208208	0.973859	0.936736	0.874707	0.822271
														0.208458	0.974344	0.937303	0.875467	0.823152
														0.208709	0.974828	0.937869	0.876227	0.824031
														0.208959	0.975312	0.938434	0.876985	0.824908
														0.209209	0.975794	0.938997	0.877742	0.825784
														0.209459	0.976275	0.93956	0.878498	0.826658
														0.20971	0.976756	0.940121	0.879252	0.827531
														0.20996	0.977235	0.940681	0.880005	0.828402
														0.21021	0.977714	0.941239	0.880757	0.829271
														0.21046	0.978192	0.941797	0.881507	0.830138
														0.210711	0.978669	0.942353	0.882257	0.831004
														0.210961	0.979145	0.942908	0.883005	0.831868
														0.211211	0.97962	0.943461	0.883751	0.832731
														0.211461	0.980094	0.944014	0.884497	0.833592
														0.211712	0.980568	0.944565	0.885241	0.834451
														0.211962	0.98104	0.945115	0.885984	0.835309
														0.212212	0.981512	0.945664	0.886726	0.836165
														0.212462	0.981983	0.946212	0.887466	0.837019
														0.212713	0.982453	0.946758	0.888206	0.837872
														0.212963	0.982922	0.947303	0.888944	0.838723
														0.213213	0.98339	0.947847	0.88968	0.839572
														0.213463	0.983857	0.94839	0.890416	0.84042
														0.213714	0.984323	0.948932	0.89115	0.841266
														0.213964	0.984789	0.949472	0.891883	0.842111
														0.214214	0.985254	0.950012	0.892615	0.842954
														0.214464	0.985718	0.95055	0.893345	0.843795
														0.214715	0.986181	0.951087	0.894074	0.844635
														0.214965	0.986643	0.951622	0.894803	0.845473
														0.215215	0.987104	0.952157	0.895529	0.846309
														0.215465	0.987565	0.952691	0.896255	0.847144
														0.215716	0.988024	0.953223	0.896979	0.847977
														0.215966	0.988483	0.953754	0.897702	0.848809
														0.216216	0.988941	0.954284	0.898424	0.849639
														0.216466	0.989398	0.954813	0.899145	0.850467
														0.216717	0.989854	0.95534	0.899864	0.851294
														0.216967	0.99031	0.955867	0.900583	0.852119
														0.217217	0.990764	0.956392	0.9013	0.852943
														0.217467	0.991218	0.956916	0.902016	0.853765
														0.217718	0.991671	0.957439	0.90273	0.854585
														0.217968	0.992123	0.957961	0.903444	0.855404
														0.218218	0.992574	0.958482	0.904156	0.856221
														0.218468	0.993025	0.959002	0.904867	0.857037
														0.218719	0.993474	0.95952	0.905577	0.857851
														0.218969	0.993923	0.960038	0.906285	0.858663
														0.219219	0.994371	0.960554	0.906993	0.859474
														0.219469	0.994818	0.961069	0.907699	0.860284
														0.21972	0.995265	0.961583	0.908404	0.861091
														0.21997	0.99571	0.962096	0.909108	0.861897
														0.22022	0.996155	0.962608	0.90981	0.862702
														0.22047	0.996599	0.963119	0.910512	0.863505
														0.220721	0.997042	0.963628	0.911212	0.864306
														0.220971	0.997484	0.964137	0.911911	0.865106
														0.221221	0.997926	0.964644	0.912609	0.865905
														0.221471	0.998367	0.96515	0.913305	0.866701
														0.221722	0.998806	0.965656	0.914001	0.867497
														0.221972	0.999246	0.96616	0.914695	0.86829
														0.222222	0.999684	0.966663	0.915388	0.869082
														0.222472	1.00012	0.967165	0.91608	0.869873
														0.222723	1.00056	0.967665	0.916771	0.870662
														0.222973	1.00099	0.968165	0.917461	0.871449
														0.223223	1.00143	0.968664	0.918149	0.872235
														0.223473	1.00186	0.969161	0.918836	0.873019
														0.223724	1.0023	0.969658	0.919522	0.873802
														0.223974	1.00273	0.970153	0.920207	0.874584
														0.224224	1.00316	0.970648	0.920891	0.875363
														0.224474	1.00359	0.971141	0.921574	0.876141
														0.224725	1.00402	0.971633	0.922255	0.876918
														0.224975	1.00445	0.972125	0.922936	0.877693
														0.225225	1.00488	0.972615	0.923615	0.878467
														0.225475	1.00531	0.973104	0.924293	0.879239
														0.225726	1.00574	0.973592	0.92497	0.88001
														0.225976	1.00616	0.974079	0.925645	0.880779
														0.226226	1.00659	0.974565	0.92632	0.881546
														0.226476	1.00702	0.97505	0.926993	0.882312
														0.226727	1.00744	0.975533	0.927666	0.883077
														0.226977	1.00786	0.976016	0.928337	0.88384
														0.227227	1.00829	0.976498	0.929007	0.884601
														0.227477	1.00871	0.976979	0.929676	0.885361
														0.227728	1.00913	0.977459	0.930344	0.88612
														0.227978	1.00955	0.977937	0.93101	0.886877
														0.228228	1.00997	0.978415	0.931676	0.887632
														0.228478	1.01039	0.978891	0.93234	0.888386
														0.228729	1.01081	0.979367	0.933003	0.889139
														0.228979	1.01123	0.979842	0.933665	0.88989
														0.229229	1.01164	0.980315	0.934326	0.890639
														0.229479	1.01206	0.980788	0.934986	0.891387
														0.22973	1.01247	0.981259	0.935645	0.892134
														0.22998	1.01289	0.98173	0.936303	0.892879
														0.23023	1.0133	0.982199	0.936959	0.893623
														0.23048	1.01372	0.982668	0.937614	0.894365
														0.230731	1.01413	0.983136	0.938269	0.895105
														0.230981	1.01454	0.983602	0.938922	0.895845
														0.231231	1.01495	0.984068	0.939574	0.896582
														0.231481	1.01536	0.984532	0.940225	0.897319
														0.231732	1.01577	0.984996	0.940875	0.898054
														0.231982	1.01618	0.985458	0.941524	0.898787
														0.232232	1.01659	0.98592	0.942171	0.899519
														0.232482	1.01699	0.986381	0.942818	0.900249
														0.232733	1.0174	0.98684	0.943463	0.900978
														0.232983	1.01781	0.987299	0.944108	0.901706
														0.233233	1.01821	0.987757	0.944751	0.902432
														0.233483	1.01862	0.988213	0.945393	0.903156
														0.233734	1.01902	0.988669	0.946034	0.90388
														0.233984	1.01942	0.989124	0.946674	0.904601
														0.234234	1.01983	0.989578	0.947313	0.905322
														0.234484	1.02023	0.99003	0.947951	0.906041
														0.234735	1.02063	0.990482	0.948588	0.906758
														0.234985	1.02103	0.990933	0.949224	0.907474
														0.235235	1.02143	0.991383	0.949858	0.908189
														0.235485	1.02183	0.991832	0.950492	0.908902
														0.235736	1.02222	0.99228	0.951124	0.909614
														0.235986	1.02262	0.992727	0.951756	0.910324
														0.236236	1.02302	0.993174	0.952386	0.911033
														0.236486	1.02341	0.993619	0.953015	0.91174
														0.236737	1.02381	0.994063	0.953643	0.912446
														0.236987	1.0242	0.994506	0.954271	0.913151
														0.237237	1.0246	0.994949	0.954897	0.913854
														0.237487	1.02499	0.99539	0.955522	0.914556
														0.237738	1.02538	0.995831	0.956146	0.915257
														0.237988	1.02578	0.99627	0.956769	0.915956
														0.238238	1.02617	0.996709	0.95739	0.916653
														0.238488	1.02656	0.997147	0.958011	0.91735
														0.238739	1.02695	0.997584	0.958631	0.918045
														0.238989	1.02734	0.99802	0.95925	0.918738
														0.239239	1.02773	0.998455	0.959867	0.91943
														0.239489	1.02811	0.998889	0.960484	0.920121
														0.23974	1.0285	0.999322	0.9611	0.92081
														0.23999	1.02889	0.999754	0.961714	0.921498
														0.24024	1.02927	1.00019	0.962328	0.922185
														0.24049	1.02966	1.00062	0.96294	0.92287
														0.240741	1.03004	1.00105	0.963551	0.923554
														0.240991	1.03043	1.00147	0.964162	0.924236
														0.241241	1.03081	1.0019	0.964771	0.924917
														0.241491	1.03119	1.00233	0.96538	0.925597
														0.241742	1.03157	1.00275	0.965987	0.926275
														0.241992	1.03195	1.00318	0.966593	0.926952
														0.242242	1.03233	1.0036	0.967198	0.927628
														0.242492	1.03271	1.00403	0.967803	0.928302
														0.242743	1.03309	1.00445	0.968406	0.928975
														0.242993	1.03347	1.00487	0.969008	0.929647
														0.243243	1.03385	1.00529	0.969609	0.930317
														0.243493	1.03423	1.00571	0.970209	0.930986
														0.243744	1.0346	1.00613	0.970808	0.931653
														0.243994	1.03498	1.00655	0.971407	0.932319
														0.244244	1.03536	1.00697	0.972004	0.932984
														0.244494	1.03573	1.00738	0.9726	0.933648
														0.244745	1.0361	1.0078	0.973195	0.93431
														0.244995	1.03648	1.00821	0.973789	0.934971
														0.245245	1.03685	1.00863	0.974382	0.93563
														0.245495	1.03722	1.00904	0.974974	0.936289
														0.245746	1.03759	1.00945	0.975565	0.936946
														0.245996	1.03796	1.00986	0.976155	0.937601
														0.246246	1.03833	1.01027	0.976744	0.938255
														0.246496	1.0387	1.01068	0.977333	0.938908
														0.246747	1.03907	1.01109	0.97792	0.93956
														0.246997	1.03944	1.0115	0.978506	0.94021
														0.247247	1.03981	1.0119	0.979091	0.940859
														0.247497	1.04018	1.01231	0.979675	0.941507
														0.247748	1.04054	1.01272	0.980258	0.942153
														0.247998	1.04091	1.01312	0.980841	0.942798
														0.248248	1.04127	1.01352	0.981422	0.943442
														0.248498	1.04164	1.01393	0.982002	0.944085
														0.248749	1.042	1.01433	0.982581	0.944726
														0.248999	1.04236	1.01473	0.983159	0.945366
														0.249249	1.04273	1.01513	0.983737	0.946004
														0.249499	1.04309	1.01553	0.984313	0.946642
														0.24975	1.04345	1.01593	0.984888	0.947278
														0.25	1.04381	1.01632	0.985463	0.947912

## Sheet: Figure 2e
I(nA)	disp (um)	disp (um)	disp (um)	disp (um)	disp (um)			current	disp(nm)											Extent of shift of displaceme and current
0	0.24	0.255	0.235	0.26	0.25			0	252.867				0	0.138	0.152	0.145	0.158	0.147
0.05	0.205	0.185	0.21	0.175	0.195			0.00012012	252.688				0.1	0.121	0.101	0.113	0.13	0.124
0.075	0.14	0.145	0.13	0.142	0.135			0.00024024	252.509				0.15	0.091	0.076	0.085	0.1	0.082
0.1	0.09	0.11	0.1	0.095	0.105			0.00036036	252.33				0.175	0.054	0.06	0.07	0.065	0.061
0.12	0.075	0.08	0.07	0.0775	0.085			0.00048048	252.151				0.2	0.042	0.051	0.036	0.047	0.038
								0.000600601	251.972				--	--
								0.000720721	251.793
								0.000840841	251.613
								0.000960961	251.434
								0.00108108	251.255
								0.0012012	251.076
								0.00132132	250.897
								0.00144144	250.718
								0.00156156	250.539
								0.00168168	250.36
								0.0018018	250.181
								0.00192192	250.002
								0.00204204	249.823
								0.00216216	249.644
								0.00228228	249.464
								0.0024024	249.285
								0.00252252	249.106
								0.00264264	248.927
								0.00276276	248.748
								0.00288288	248.569
								0.003003	248.39
								0.00312312	248.211
								0.00324324	248.032
								0.00336336	247.853
								0.00348348	247.674
								0.0036036	247.495
								0.00372372	247.316
								0.00384384	247.136
								0.00396396	246.957
								0.00408408	246.778
								0.0042042	246.599
								0.00432432	246.42
								0.00444444	246.241
								0.00456456	246.062
								0.00468468	245.883
								0.0048048	245.704
								0.00492492	245.525
								0.00504505	245.346
								0.00516517	245.167
								0.00528529	244.988
								0.00540541	244.808
								0.00552553	244.629
								0.00564565	244.45
								0.00576577	244.271
								0.00588589	244.092
								0.00600601	243.913
								0.00612613	243.734
								0.00624625	243.555
								0.00636637	243.376
								0.00648649	243.197
								0.00660661	243.018
								0.00672673	242.839
								0.00684685	242.66
								0.00696697	242.48
								0.00708709	242.301
								0.00720721	242.122
								0.00732733	241.943
								0.00744745	241.764
								0.00756757	241.585
								0.00768769	241.406
								0.00780781	241.227
								0.00792793	241.048
								0.00804805	240.869
								0.00816817	240.69
								0.00828829	240.511
								0.00840841	240.332
								0.00852853	240.152
								0.00864865	239.973
								0.00876877	239.794
								0.00888889	239.615
								0.00900901	239.436
								0.00912913	239.257
								0.00924925	239.078
								0.00936937	238.899
								0.00948949	238.72
								0.00960961	238.541
								0.00972973	238.362
								0.00984985	238.183
								0.00996997	238.003
								0.0100901	237.824
								0.0102102	237.645
								0.0103303	237.466
								0.0104505	237.287
								0.0105706	237.108
								0.0106907	236.929
								0.0108108	236.75
								0.0109309	236.571
								0.0110511	236.392
								0.0111712	236.213
								0.0112913	236.034
								0.0114114	235.855
								0.0115315	235.675
								0.0116517	235.496
								0.0117718	235.317
								0.0118919	235.138
								0.012012	234.959
								0.0121321	234.78
								0.0122523	234.601
								0.0123724	234.422
								0.0124925	234.243
								0.0126126	234.064
								0.0127327	233.885
								0.0128529	233.706
								0.012973	233.527
								0.0130931	233.347
								0.0132132	233.168
								0.0133333	232.989
								0.0134535	232.81
								0.0135736	232.631
								0.0136937	232.452
								0.0138138	232.273
								0.0139339	232.094
								0.0140541	231.915
								0.0141742	231.736
								0.0142943	231.557
								0.0144144	231.378
								0.0145345	231.199
								0.0146547	231.019
								0.0147748	230.84
								0.0148949	230.661
								0.015015	230.482
								0.0151351	230.303
								0.0152553	230.124
								0.0153754	229.945
								0.0154955	229.766
								0.0156156	229.587
								0.0157357	229.408
								0.0158559	229.229
								0.015976	229.05
								0.0160961	228.87
								0.0162162	228.691
								0.0163363	228.512
								0.0164565	228.333
								0.0165766	228.154
								0.0166967	227.975
								0.0168168	227.796
								0.0169369	227.617
								0.0170571	227.438
								0.0171772	227.259
								0.0172973	227.08
								0.0174174	226.901
								0.0175375	226.722
								0.0176577	226.542
								0.0177778	226.363
								0.0178979	226.184
								0.018018	226.005
								0.0181381	225.826
								0.0182583	225.647
								0.0183784	225.468
								0.0184985	225.289
								0.0186186	225.11
								0.0187387	224.931
								0.0188589	224.752
								0.018979	224.573
								0.0190991	224.394
								0.0192192	224.214
								0.0193393	224.035
								0.0194595	223.856
								0.0195796	223.677
								0.0196997	223.498
								0.0198198	223.319
								0.0199399	223.14
								0.0200601	222.961
								0.0201802	222.782
								0.0203003	222.603
								0.0204204	222.424
								0.0205405	222.245
								0.0206607	222.066
								0.0207808	221.886
								0.0209009	221.707
								0.021021	221.528
								0.0211411	221.349
								0.0212613	221.17
								0.0213814	220.991
								0.0215015	220.812
								0.0216216	220.633
								0.0217417	220.454
								0.0218619	220.275
								0.021982	220.096
								0.0221021	219.917
								0.0222222	219.738
								0.0223423	219.558
								0.0224625	219.379
								0.0225826	219.2
								0.0227027	219.021
								0.0228228	218.842
								0.0229429	218.663
								0.0230631	218.484
								0.0231832	218.305
								0.0233033	218.126
								0.0234234	217.947
								0.0235435	217.768
								0.0236637	217.589
								0.0237838	217.409
								0.0239039	217.23
								0.024024	217.051
								0.0241441	216.872
								0.0242643	216.693
								0.0243844	216.514
								0.0245045	216.335
								0.0246246	216.156
								0.0247447	215.977
								0.0248649	215.798
								0.024985	215.619
								0.0251051	215.44
								0.0252252	215.261
								0.0253453	215.081
								0.0254655	214.902
								0.0255856	214.723
								0.0257057	214.544
								0.0258258	214.365
								0.0259459	214.186
								0.0260661	214.007
								0.0261862	213.828
								0.0263063	213.649
								0.0264264	213.47
								0.0265465	213.291
								0.0266667	213.112
								0.0267868	212.933
								0.0269069	212.753
								0.027027	212.574
								0.0271471	212.395
								0.0272673	212.216
								0.0273874	212.037
								0.0275075	211.858
								0.0276276	211.679
								0.0277477	211.5
								0.0278679	211.321
								0.027988	211.142
								0.0281081	210.963
								0.0282282	210.784
								0.0283483	210.605
								0.0284685	210.425
								0.0285886	210.246
								0.0287087	210.067
								0.0288288	209.888
								0.0289489	209.709
								0.0290691	209.53
								0.0291892	209.351
								0.0293093	209.172
								0.0294294	208.993
								0.0295495	208.814
								0.0296697	208.635
								0.0297898	208.456
								0.0299099	208.277
								0.03003	208.097
								0.0301502	207.918
								0.0302703	207.739
								0.0303904	207.56
								0.0305105	207.381
								0.0306306	207.202
								0.0307508	207.023
								0.0308709	206.844
								0.030991	206.665
								0.0311111	206.486
								0.0312312	206.307
								0.0313514	206.128
								0.0314715	205.948
								0.0315916	205.769
								0.0317117	205.59
								0.0318318	205.411
								0.031952	205.232
								0.0320721	205.053
								0.0321922	204.874
								0.0323123	204.695
								0.0324324	204.516
								0.0325526	204.337
								0.0326727	204.158
								0.0327928	203.979
								0.0329129	203.8
								0.033033	203.62
								0.0331532	203.441
								0.0332733	203.262
								0.0333934	203.083
								0.0335135	202.904
								0.0336336	202.725
								0.0337538	202.546
								0.0338739	202.367
								0.033994	202.188
								0.0341141	202.009
								0.0342342	201.83
								0.0343544	201.651
								0.0344745	201.472
								0.0345946	201.292
								0.0347147	201.113
								0.0348348	200.934
								0.034955	200.755
								0.0350751	200.576
								0.0351952	200.397
								0.0353153	200.218
								0.0354354	200.039
								0.0355556	199.86
								0.0356757	199.681
								0.0357958	199.502
								0.0359159	199.323
								0.036036	199.144
								0.0361562	198.964
								0.0362763	198.785
								0.0363964	198.606
								0.0365165	198.427
								0.0366366	198.248
								0.0367568	198.069
								0.0368769	197.89
								0.036997	197.711
								0.0371171	197.532
								0.0372372	197.353
								0.0373574	197.174
								0.0374775	196.995
								0.0375976	196.816
								0.0377177	196.636
								0.0378378	196.457
								0.037958	196.278
								0.0380781	196.099
								0.0381982	195.92
								0.0383183	195.741
								0.0384384	195.562
								0.0385586	195.383
								0.0386787	195.204
								0.0387988	195.025
								0.0389189	194.846
								0.039039	194.667
								0.0391592	194.487
								0.0392793	194.308
								0.0393994	194.129
								0.0395195	193.95
								0.0396396	193.771
								0.0397598	193.592
								0.0398799	193.413
								0.04	193.234
								0.0401201	193.055
								0.0402402	192.876
								0.0403604	192.697
								0.0404805	192.518
								0.0406006	192.339
								0.0407207	192.159
								0.0408408	191.98
								0.040961	191.801
								0.0410811	191.622
								0.0412012	191.443
								0.0413213	191.264
								0.0414414	191.085
								0.0415616	190.906
								0.0416817	190.727
								0.0418018	190.548
								0.0419219	190.369
								0.042042	190.19
								0.0421622	190.011
								0.0422823	189.831
								0.0424024	189.652
								0.0425225	189.473
								0.0426426	189.294
								0.0427628	189.115
								0.0428829	188.936
								0.043003	188.757
								0.0431231	188.578
								0.0432432	188.399
								0.0433634	188.22
								0.0434835	188.041
								0.0436036	187.862
								0.0437237	187.683
								0.0438438	187.503
								0.043964	187.324
								0.0440841	187.145
								0.0442042	186.966
								0.0443243	186.787
								0.0444444	186.608
								0.0445646	186.429
								0.0446847	186.25
								0.0448048	186.071
								0.0449249	185.892
								0.045045	185.713
								0.0451652	185.534
								0.0452853	185.355
								0.0454054	185.175
								0.0455255	184.996
								0.0456456	184.817
								0.0457658	184.638
								0.0458859	184.459
								0.046006	184.28
								0.0461261	184.101
								0.0462462	183.922
								0.0463664	183.743
								0.0464865	183.564
								0.0466066	183.385
								0.0467267	183.206
								0.0468468	183.026
								0.046967	182.847
								0.0470871	182.668
								0.0472072	182.489
								0.0473273	182.31
								0.0474474	182.131
								0.0475676	181.952
								0.0476877	181.773
								0.0478078	181.594
								0.0479279	181.415
								0.048048	181.236
								0.0481682	181.057
								0.0482883	180.878
								0.0484084	180.698
								0.0485285	180.519
								0.0486486	180.34
								0.0487688	180.161
								0.0488889	179.982
								0.049009	179.803
								0.0491291	179.624
								0.0492492	179.445
								0.0493694	179.266
								0.0494895	179.087
								0.0496096	178.908
								0.0497297	178.729
								0.0498498	178.55
								0.04997	178.37
								0.0500901	178.191
								0.0502102	178.012
								0.0503303	177.833
								0.0504505	177.654
								0.0505706	177.475
								0.0506907	177.296
								0.0508108	177.117
								0.0509309	176.938
								0.0510511	176.759
								0.0511712	176.58
								0.0512913	176.401
								0.0514114	176.222
								0.0515315	176.042
								0.0516517	175.863
								0.0517718	175.684
								0.0518919	175.505
								0.052012	175.326
								0.0521321	175.147
								0.0522523	174.968
								0.0523724	174.789
								0.0524925	174.61
								0.0526126	174.431
								0.0527327	174.252
								0.0528529	174.073
								0.052973	173.894
								0.0530931	173.714
								0.0532132	173.535
								0.0533333	173.356
								0.0534535	173.177
								0.0535736	172.998
								0.0536937	172.819
								0.0538138	172.64
								0.0539339	172.461
								0.0540541	172.282
								0.0541742	172.103
								0.0542943	171.924
								0.0544144	171.745
								0.0545345	171.565
								0.0546547	171.386
								0.0547748	171.207
								0.0548949	171.028
								0.055015	170.849
								0.0551351	170.67
								0.0552553	170.491
								0.0553754	170.312
								0.0554955	170.133
								0.0556156	169.954
								0.0557357	169.775
								0.0558559	169.596
								0.055976	169.417
								0.0560961	169.237
								0.0562162	169.058
								0.0563363	168.879
								0.0564565	168.7
								0.0565766	168.521
								0.0566967	168.342
								0.0568168	168.163
								0.0569369	167.984
								0.0570571	167.805
								0.0571772	167.626
								0.0572973	167.447
								0.0574174	167.268
								0.0575375	167.089
								0.0576577	166.909
								0.0577778	166.73
								0.0578979	166.551
								0.058018	166.372
								0.0581381	166.193
								0.0582583	166.014
								0.0583784	165.835
								0.0584985	165.656
								0.0586186	165.477
								0.0587387	165.298
								0.0588589	165.119
								0.058979	164.94
								0.0590991	164.761
								0.0592192	164.581
								0.0593393	164.402
								0.0594595	164.223
								0.0595796	164.044
								0.0596997	163.865
								0.0598198	163.686
								0.0599399	163.507
								0.0600601	163.328
								0.0601802	163.149
								0.0603003	162.97
								0.0604204	162.791
								0.0605405	162.612
								0.0606607	162.433
								0.0607808	162.253
								0.0609009	162.074
								0.061021	161.895
								0.0611411	161.716
								0.0612613	161.537
								0.0613814	161.358
								0.0615015	161.179
								0.0616216	161
								0.0617417	160.821
								0.0618619	160.642
								0.061982	160.463
								0.0621021	160.284
								0.0622222	160.104
								0.0623423	159.925
								0.0624625	159.746
								0.0625826	159.567
								0.0627027	159.388
								0.0628228	159.209
								0.0629429	159.03
								0.0630631	158.851
								0.0631832	158.672
								0.0633033	158.493
								0.0634234	158.314
								0.0635435	158.135
								0.0636637	157.956
								0.0637838	157.776
								0.0639039	157.597
								0.064024	157.418
								0.0641441	157.239
								0.0642643	157.06
								0.0643844	156.881
								0.0645045	156.702
								0.0646246	156.523
								0.0647447	156.344
								0.0648649	156.165
								0.064985	155.986
								0.0651051	155.807
								0.0652252	155.628
								0.0653453	155.448
								0.0654655	155.269
								0.0655856	155.09
								0.0657057	154.911
								0.0658258	154.732
								0.0659459	154.553
								0.0660661	154.374
								0.0661862	154.195
								0.0663063	154.016
								0.0664264	153.837
								0.0665465	153.658
								0.0666667	153.479
								0.0667868	153.3
								0.0669069	153.12
								0.067027	152.941
								0.0671471	152.762
								0.0672673	152.583
								0.0673874	152.404
								0.0675075	152.225
								0.0676276	152.046
								0.0677477	151.867
								0.0678679	151.688
								0.067988	151.509
								0.0681081	151.33
								0.0682282	151.151
								0.0683483	150.971
								0.0684685	150.792
								0.0685886	150.613
								0.0687087	150.434
								0.0688288	150.255
								0.0689489	150.076
								0.0690691	149.897
								0.0691892	149.718
								0.0693093	149.539
								0.0694294	149.36
								0.0695495	149.181
								0.0696697	149.002
								0.0697898	148.823
								0.0699099	148.643
								0.07003	148.464
								0.0701502	148.285
								0.0702703	148.106
								0.0703904	147.927
								0.0705105	147.748
								0.0706306	147.569
								0.0707508	147.39
								0.0708709	147.211
								0.070991	147.032
								0.0711111	146.853
								0.0712312	146.674
								0.0713514	146.495
								0.0714715	146.315
								0.0715916	146.136
								0.0717117	145.957
								0.0718318	145.778
								0.071952	145.599
								0.0720721	145.42
								0.0721922	145.241
								0.0723123	145.062
								0.0724324	144.883
								0.0725526	144.704
								0.0726727	144.525
								0.0727928	144.346
								0.0729129	144.167
								0.073033	143.987
								0.0731532	143.808
								0.0732733	143.629
								0.0733934	143.45
								0.0735135	143.271
								0.0736336	143.092
								0.0737538	142.913
								0.0738739	142.734
								0.073994	142.555
								0.0741141	142.376
								0.0742342	142.197
								0.0743544	142.018
								0.0744745	141.839
								0.0745946	141.659
								0.0747147	141.48
								0.0748348	141.301
								0.074955	141.122
								0.0750751	140.943
								0.0751952	140.764
								0.0753153	140.585
								0.0754354	140.406
								0.0755556	140.227
								0.0756757	140.048
								0.0757958	139.869
								0.0759159	139.69
								0.076036	139.51
								0.0761562	139.331
								0.0762763	139.152
								0.0763964	138.973
								0.0765165	138.794
								0.0766366	138.615
								0.0767568	138.436
								0.0768769	138.257
								0.076997	138.078
								0.0771171	137.899
								0.0772372	137.72
								0.0773574	137.541
								0.0774775	137.362
								0.0775976	137.182
								0.0777177	137.003
								0.0778378	136.824
								0.077958	136.645
								0.0780781	136.466
								0.0781982	136.287
								0.0783183	136.108
								0.0784384	135.929
								0.0785586	135.75
								0.0786787	135.571
								0.0787988	135.392
								0.0789189	135.213
								0.079039	135.034
								0.0791592	134.854
								0.0792793	134.675
								0.0793994	134.496
								0.0795195	134.317
								0.0796396	134.138
								0.0797598	133.959
								0.0798799	133.78
								0.08	133.601
								0.0801201	133.422
								0.0802402	133.243
								0.0803604	133.064
								0.0804805	132.885
								0.0806006	132.706
								0.0807207	132.526
								0.0808408	132.347
								0.080961	132.168
								0.0810811	131.989
								0.0812012	131.81
								0.0813213	131.631
								0.0814414	131.452
								0.0815616	131.273
								0.0816817	131.094
								0.0818018	130.915
								0.0819219	130.736
								0.082042	130.557
								0.0821622	130.378
								0.0822823	130.198
								0.0824024	130.019
								0.0825225	129.84
								0.0826426	129.661
								0.0827628	129.482
								0.0828829	129.303
								0.083003	129.124
								0.0831231	128.945
								0.0832432	128.766
								0.0833634	128.587
								0.0834835	128.408
								0.0836036	128.229
								0.0837237	128.049
								0.0838438	127.87
								0.083964	127.691
								0.0840841	127.512
								0.0842042	127.333
								0.0843243	127.154
								0.0844444	126.975
								0.0845646	126.796
								0.0846847	126.617
								0.0848048	126.438
								0.0849249	126.259
								0.085045	126.08
								0.0851652	125.901
								0.0852853	125.721
								0.0854054	125.542
								0.0855255	125.363
								0.0856456	125.184
								0.0857658	125.005
								0.0858859	124.826
								0.086006	124.647
								0.0861261	124.468
								0.0862462	124.289
								0.0863664	124.11
								0.0864865	123.931
								0.0866066	123.752
								0.0867267	123.573
								0.0868468	123.393
								0.086967	123.214
								0.0870871	123.035
								0.0872072	122.856
								0.0873273	122.677
								0.0874474	122.498
								0.0875676	122.319
								0.0876877	122.14
								0.0878078	121.961
								0.0879279	121.782
								0.088048	121.603
								0.0881682	121.424
								0.0882883	121.245
								0.0884084	121.065
								0.0885285	120.886
								0.0886486	120.707
								0.0887688	120.528
								0.0888889	120.349
								0.089009	120.17
								0.0891291	119.991
								0.0892492	119.812
								0.0893694	119.633
								0.0894895	119.454
								0.0896096	119.275
								0.0897297	119.096
								0.0898498	118.917
								0.08997	118.737
								0.0900901	118.558
								0.0902102	118.379
								0.0903303	118.2
								0.0904505	118.021
								0.0905706	117.842
								0.0906907	117.663
								0.0908108	117.484
								0.0909309	117.305
								0.0910511	117.126
								0.0911712	116.947
								0.0912913	116.768
								0.0914114	116.588
								0.0915315	116.409
								0.0916517	116.23
								0.0917718	116.051
								0.0918919	115.872
								0.092012	115.693
								0.0921321	115.514
								0.0922523	115.335
								0.0923724	115.156
								0.0924925	114.977
								0.0926126	114.798
								0.0927327	114.619
								0.0928529	114.44
								0.092973	114.26
								0.0930931	114.081
								0.0932132	113.902
								0.0933333	113.723
								0.0934535	113.544
								0.0935736	113.365
								0.0936937	113.186
								0.0938138	113.007
								0.0939339	112.828
								0.0940541	112.649
								0.0941742	112.47
								0.0942943	112.291
								0.0944144	112.112
								0.0945345	111.932
								0.0946547	111.753
								0.0947748	111.574
								0.0948949	111.395
								0.095015	111.216
								0.0951351	111.037
								0.0952553	110.858
								0.0953754	110.679
								0.0954955	110.5
								0.0956156	110.321
								0.0957357	110.142
								0.0958559	109.963
								0.095976	109.784
								0.0960961	109.604
								0.0962162	109.425
								0.0963363	109.246
								0.0964565	109.067
								0.0965766	108.888
								0.0966967	108.709
								0.0968168	108.53
								0.0969369	108.351
								0.0970571	108.172
								0.0971772	107.993
								0.0972973	107.814
								0.0974174	107.635
								0.0975375	107.456
								0.0976577	107.276
								0.0977778	107.097
								0.0978979	106.918
								0.098018	106.739
								0.0981381	106.56
								0.0982583	106.381
								0.0983784	106.202
								0.0984985	106.023
								0.0986186	105.844
								0.0987387	105.665
								0.0988589	105.486
								0.098979	105.307
								0.0990991	105.127
								0.0992192	104.948
								0.0993393	104.769
								0.0994595	104.59
								0.0995796	104.411
								0.0996997	104.232
								0.0998198	104.053
								0.0999399	103.874
								0.10006	103.695
								0.10018	103.516
								0.1003	103.337
								0.10042	103.158
								0.100541	102.979
								0.100661	102.799
								0.100781	102.62
								0.100901	102.441
								0.101021	102.262
								0.101141	102.083
								0.101261	101.904
								0.101381	101.725
								0.101502	101.546
								0.101622	101.367
								0.101742	101.188
								0.101862	101.009
								0.101982	100.83
								0.102102	100.651
								0.102222	100.471
								0.102342	100.292
								0.102462	100.113
								0.102583	99.9342
								0.102703	99.7551
								0.102823	99.5761
								0.102943	99.397
								0.103063	99.2179
								0.103183	99.0388
								0.103303	98.8598
								0.103423	98.6807
								0.103544	98.5016
								0.103664	98.3225
								0.103784	98.1434
								0.103904	97.9644
								0.104024	97.7853
								0.104144	97.6062
								0.104264	97.4271
								0.104384	97.2481
								0.104505	97.069
								0.104625	96.8899
								0.104745	96.7108
								0.104865	96.5317
								0.104985	96.3527
								0.105105	96.1736
								0.105225	95.9945
								0.105345	95.8154
								0.105465	95.6363
								0.105586	95.4573
								0.105706	95.2782
								0.105826	95.0991
								0.105946	94.92
								0.106066	94.741
								0.106186	94.5619
								0.106306	94.3828
								0.106426	94.2037
								0.106547	94.0246
								0.106667	93.8456
								0.106787	93.6665
								0.106907	93.4874
								0.107027	93.3083
								0.107147	93.1293
								0.107267	92.9502
								0.107387	92.7711
								0.107508	92.592
								0.107628	92.4129
								0.107748	92.2339
								0.107868	92.0548
								0.107988	91.8757
								0.108108	91.6966
								0.108228	91.5175
								0.108348	91.3385
								0.108468	91.1594
								0.108589	90.9803
								0.108709	90.8012
								0.108829	90.6222
								0.108949	90.4431
								0.109069	90.264
								0.109189	90.0849
								0.109309	89.9058
								0.109429	89.7268
								0.10955	89.5477
								0.10967	89.3686
								0.10979	89.1895
								0.10991	89.0105
								0.11003	88.8314
								0.11015	88.6523
								0.11027	88.4732
								0.11039	88.2941
								0.110511	88.1151
								0.110631	87.936
								0.110751	87.7569
								0.110871	87.5778
								0.110991	87.3988
								0.111111	87.2197
								0.111231	87.0406
								0.111351	86.8615
								0.111471	86.6824
								0.111592	86.5034
								0.111712	86.3243
								0.111832	86.1452
								0.111952	85.9661
								0.112072	85.787
								0.112192	85.608
								0.112312	85.4289
								0.112432	85.2498
								0.112553	85.0707
								0.112673	84.8917
								0.112793	84.7126
								0.112913	84.5335
								0.113033	84.3544
								0.113153	84.1753
								0.113273	83.9963
								0.113393	83.8172
								0.113514	83.6381
								0.113634	83.459
								0.113754	83.28
								0.113874	83.1009
								0.113994	82.9218
								0.114114	82.7427
								0.114234	82.5636
								0.114354	82.3846
								0.114474	82.2055
								0.114595	82.0264
								0.114715	81.8473
								0.114835	81.6683
								0.114955	81.4892
								0.115075	81.3101
								0.115195	81.131
								0.115315	80.9519
								0.115435	80.7729
								0.115556	80.5938
								0.115676	80.4147
								0.115796	80.2356
								0.115916	80.0565
								0.116036	79.8775
								0.116156	79.6984
								0.116276	79.5193
								0.116396	79.3402
								0.116517	79.1612
								0.116637	78.9821
								0.116757	78.803
								0.116877	78.6239
								0.116997	78.4448
								0.117117	78.2658
								0.117237	78.0867
								0.117357	77.9076
								0.117477	77.7285
								0.117598	77.5495
								0.117718	77.3704
								0.117838	77.1913
								0.117958	77.0122
								0.118078	76.8331
								0.118198	76.6541
								0.118318	76.475
								0.118438	76.2959
								0.118559	76.1168
								0.118679	75.9377
								0.118799	75.7587
								0.118919	75.5796
								0.119039	75.4005
								0.119159	75.2214
								0.119279	75.0424
								0.119399	74.8633
								0.11952	74.6842
								0.11964	74.5051
								0.11976	74.326
								0.11988	74.147
								0.12	73.9679

## Sheet: Figure 2g
	Control	lower						Current (0.2 nA) preceding displacement			lacement (0.3 um)		C= current ms= displacement
	C-ms	C-ms
0	-63.5376	-57.5561
0.05	-63.7512	-57.4951
0.1	-63.5681	-57.5867
0.15	-63.5376	-57.6172
0.2	-63.446	-57.5561
0.25	-63.6291	-57.4036
0.3	-63.6291	-57.8003
0.35	-63.5681	-57.5867
0.4	-63.5071	-57.373
0.45	-63.4155	-57.6477
0.5	-63.6902	-57.6172
0.55	-63.6291	-57.4951
0.6	-63.5986	-57.3425
0.65	-63.446	-57.6172
0.7	-63.4766	-57.4646
0.75	-63.6902	-57.3425
0.8	-63.5681	-57.4036
0.85	-63.5071	-57.4646
0.9	-63.3545	-57.4951
0.95	-63.5071	-57.1899
1	-63.6902	-57.4646
1.05	-63.5071	-57.4036
1.1	-63.5071	-57.4951
1.15	-63.2935	-57.251
1.2	-63.4155	-57.5561
1.25	-63.6597	-57.4646
1.3	-63.5376	-57.4341
1.35	-63.5376	-57.3425
1.4	-63.2629	-57.5867
1.45	-63.4155	-57.3425
1.5	-63.5986	-57.4036
1.55	-63.6597	-57.2205
1.6	-63.5071	-57.5256
1.65	-63.4766	-57.4341
1.7	-63.446	-57.373
1.75	-63.4766	-57.2205
1.8	-63.6291	-57.4951
1.85	-63.4766	-57.373
1.9	-63.5376	-57.312
1.95	-63.324	-57.1289
2	-63.2935	-57.4341
2.05	-63.4766	-57.4036
2.1	-63.5681	-57.3425
2.15	-63.4766	-57.312
2.2	-63.4155	-57.373
2.25	-63.385	-57.5561
2.3	-63.2935	-57.4036
2.35	-63.4155	-57.373
2.4	-63.5071	-57.1594
2.45	-63.5376	-57.4951
2.5	-63.5376	-57.4341
2.55	-63.5376	-57.4646
2.6	-63.385	-57.2205
2.65	-63.3545	-57.2815
2.7	-63.5681	-57.4646
2.75	-63.6597	-57.4036
2.8	-63.5071	-57.373
2.85	-63.5071	-57.1899
2.9	-63.4766	-57.4036
2.95	-63.4766	-57.4951
3	-63.324	-57.4036
3.05	-63.4766	-57.373
3.1	-63.6597	-57.0984
3.15	-63.5681	-57.373
3.2	-63.4766	-57.5867
3.25	-63.5071	-57.4341
3.3	-63.446	-57.3425
3.35	-63.2935	-57.1289
3.4	-63.2629	-57.373
3.45	-63.446	-57.5561
3.5	-63.5071	-57.4036
3.55	-63.6291	-57.4646
3.6	-63.4766	-57.2815
3.65	-63.5071	-57.312
3.7	-63.2629	-57.5256
3.75	-63.5986	-57.5561
3.8	-63.6597	-57.4646
3.85	-63.5681	-57.3425
3.9	-63.4155	-57.1594
3.95	-63.5681	-57.373
4	-63.7207	-57.5256
4.05	-63.5681	-57.4341
4.1	-63.2935	-57.4951
4.15	-63.7512	-57.2815
4.2	-63.4766	-57.1899
4.25	-63.3545	-57.4341
4.3	-63.5376	-57.5256
4.35	-63.385	-57.4341
4.4	-63.5681	-57.312
4.45	-63.5681	-57.4036
4.5	-63.2324	-57.1899
4.55	-63.5681	-57.2205
4.6	-63.385	-57.4951
4.65	-63.5681	-57.6172
4.7	-63.5376	-57.4036
4.75	-63.2324	-57.4036
4.8	-63.6291	-57.4036
4.85	-63.4155	-57.2815
4.9	-63.5986	-57.4036
4.95	-63.5376	-57.5867
5	-63.3545	-57.5867
5.05	-63.6597	-57.4646
5.1	-63.385	-57.4036
5.15	-63.446	-57.4341
5.2	-63.6291	-57.2205
5.25	-63.4766	-57.3425
5.3	-63.5376	-57.4036
5.35	-63.4155	-57.6172
5.4	-63.2324	-57.4951
5.45	-63.5071	-57.373
5.5	-63.5376	-57.5561
5.55	-63.2324	-57.4646
5.6	-63.5071	-57.2815
5.65	-63.5071	-57.312
5.7	-63.324	-57.5561
5.75	-63.4766	-57.6477
5.8	-63.446	-57.4951
5.85	-63.4766	-57.5256
5.9	-63.4766	-57.373
5.95	-63.5071	-57.4036
6	-63.446	-57.5561
6.05	-63.2629	-57.5256
6.1	-63.6291	-57.4646
6.15	-63.446	-57.3425
6.2	-63.2324	-57.6172
6.25	-63.5681	-57.4341
6.3	-63.5681	-57.2205
6.35	-63.2935	-57.6172
6.4	-63.3545	-57.5867
6.45	-63.5376	-57.251
6.5	-63.5071	-57.5867
6.55	-63.2629	-57.5256
6.6	-63.5071	-57.5256
6.65	-63.4155	-57.5561
6.7	-63.385	-57.312
6.75	-63.4155	-57.7698
6.8	-63.5376	-57.5256
6.85	-63.4766	-57.5256
6.9	-63.2629	-57.6172
6.95	-63.5071	-57.4036
7	-63.4766	-57.7698
7.05	-63.385	-57.5561
7.1	-63.324	-57.5256
7.15	-63.5986	-57.7087
7.2	-63.4766	-57.4036
7.25	-63.4155	-57.7087
7.3	-63.385	-57.5867
7.35	-63.5681	-57.373
7.4	-63.4155	-57.7087
7.45	-63.2324	-57.6477
7.5	-63.4155	-57.4646
7.55	-63.446	-57.7393
7.6	-63.324	-57.6477
7.65	-63.1714	-57.5561
7.7	-63.3545	-57.7393
7.75	-63.4155	-57.6172
7.8	-63.4155	-57.5867
7.85	-63.1409	-57.7698
7.9	-63.2935	-57.7087
7.95	-63.5071	-57.5561
8	-63.385	-57.8308
8.05	-63.1714	-57.8308
8.1	-63.2629	-57.4341
8.15	-63.5071	-57.8613
8.2	-63.385	-57.7393
8.25	-63.2629	-57.6782
8.3	-63.2019	-57.7393
8.35	-63.4155	-57.7393
8.4	-63.385	-57.7393
8.45	-63.2629	-57.6172
8.5	-63.1714	-57.9224
8.55	-63.4155	-57.8003
8.6	-63.385	-57.5561
8.65	-63.2629	-57.8918
8.7	-63.1714	-57.8613
8.75	-63.2019	-57.8003
8.8	-63.3545	-57.6172
8.85	-63.2629	-58.0749
8.9	-63.2324	-57.9224
8.95	-63.0188	-57.8003
9	-63.324	-57.8308
9.05	-63.324	-58.0444
9.1	-63.324	-57.9529
9.15	-63.2324	-57.7393
9.2	-63.1714	-58.0139
9.25	-63.4155	-57.9834
9.3	-63.385	-57.9529
9.35	-63.2935	-57.7698
9.4	-63.2324	-58.1055
9.45	-63.1409	-57.9834
9.5	-63.2935	-57.8918
9.55	-63.385	-57.8918
9.6	-63.324	-58.0444
9.65	-63.2629	-58.0139
9.7	-63.0493	-57.8613
9.75	-63.2935	-57.8308
9.8	-63.3545	-58.0749
9.85	-63.2935	-57.9834
9.9	-63.2935	-57.9529
9.95	-62.9883	-57.8613
10	-63.1409	-58.1665
10.05	-63.385	-58.0444
10.1	-63.4155	-58.0139
10.15	-63.324	-57.9834
10.2	-63.2324	-58.1665
10.25	-63.1103	-58.0749
10.3	-63.2935	-58.0749
10.35	-63.4766	-57.8918
10.4	-63.3545	-58.197
10.45	-63.446	-58.0749
10.5	-63.324	-58.1055
10.55	-63.0493	-57.8308
10.6	-63.324	-57.9224
10.65	-63.446	-58.0139
10.7	-63.4155	-58.0139
10.75	-63.2935	-57.8918
10.8	-63.2629	-57.8308
10.85	-63.1714	-58.0749
10.9	-63.0798	-58.0139
10.95	-63.2629	-58.0749
11	-63.3545	-57.8613
11.05	-63.2935	-57.9224
11.1	-63.2629	-58.0749
11.15	-63.2324	-58.0444
11.2	-63.1409	-58.1055
11.25	-63.1409	-57.8613
11.3	-63.385	-58.0444
11.35	-63.4155	-58.197
11.4	-63.446	-58.136
11.45	-63.324	-57.9529
11.5	-63.4155	-57.8308
11.55	-63.2629	-58.0749
11.6	-63.1103	-58.1665
11.65	-63.2629	-57.9834
11.7	-63.4766	-57.9834
11.75	-63.4766	-57.8918
11.8	-63.3545	-57.8918
11.85	-63.4155	-58.136
11.9	-63.3545	-58.0139
11.95	-63.2629	-58.0139
12	-63.2935	-57.8918
12.05	-63.4155	-57.7393
12.1	-63.4155	-57.9529
12.15	-63.2935	-58.0749
12.2	-63.1103	-58.0749
12.25	-63.4155	-58.0139
12.3	-63.446	-57.9529
12.35	-63.2324	-57.8308
12.4	-63.324	-58.136
12.45	-63.385	-58.136
12.5	-63.2935	-58.0139
12.55	-63.2935	-58.0749
12.6	-63.446	-57.9224
12.65	-63.1714	-57.8613
12.7	-63.385	-57.9834
12.75	-63.385	-58.1055
12.8	-63.1714	-58.0139
12.85	-63.3545	-57.9529
12.9	-63.2324	-57.8308
12.95	-63.3545	-57.7087
13	-63.4155	-57.7698
13.05	-63.0188	-57.9834
13.1	-63.4155	-57.9834
13.15	-63.2019	-57.8918
13.2	-63.2935	-57.9224
13.25	-63.2935	-57.8918
13.3	-63.0493	-57.7698
13.35	-63.4155	-57.7393
13.4	-63.2935	-57.8918
13.45	-63.2019	-58.0749
13.5	-63.324	-58.0444
13.55	-63.2019	-57.9834
13.6	-63.446	-57.9224
13.65	-63.3545	-57.8308
13.7	-63.1714	-57.7393
13.75	-63.4766	-57.8003
13.8	-63.5071	-57.9529
13.85	-63.2629	-57.9834
13.9	-63.446	-57.9529
13.95	-63.385	-57.8613
14	-63.2324	-57.8308
14.05	-63.5986	-57.7698
14.1	-63.385	-57.6782
14.15	-63.2324	-57.9224
14.2	-63.4155	-57.8918
14.25	-63.446	-57.8308
14.3	-63.324	-57.8918
14.35	-63.2629	-57.6172
14.4	-63.5986	-57.9529
14.45	-63.4766	-57.8613
14.5	-63.1103	-57.8613
14.55	-63.5376	-57.9224
14.6	-63.385	-57.9224
14.65	-63.385	-57.8003
14.7	-63.3545	-58.0139
14.75	-63.5071	-57.9529
14.8	-63.385	-57.7087
14.85	-63.3545	-58.0444
14.9	-63.6902	-57.9834
14.95	-63.446	-57.8918
15	-63.2935	-57.9529
15.05	-63.5071	-57.7698
15.1	-63.5986	-58.0749
15.15	-63.446	-57.9224
15.2	-63.2324	-57.9224
15.25	-63.5986	-58.0139
15.3	-63.5376	-57.7393
15.35	-63.446	-58.1665
15.4	-63.385	-57.9529
15.45	-63.6291	-57.9834
15.5	-63.5071	-58.0444
15.55	-63.324	-57.8308
15.6	-63.4155	-58.1665
15.65	-63.5681	-58.0139
15.7	-63.446	-58.0139
15.75	-63.2935	-58.0749
15.8	-63.5071	-58.0139
15.85	-63.5376	-58.0749
15.9	-63.4766	-58.0444
15.95	-63.385	-57.8003
16	-63.5376	-58.2275
16.05	-63.5681	-58.1055
16.1	-63.5376	-57.7393
16.15	-63.3545	-58.197
16.2	-63.5681	-58.0444
16.25	-63.6291	-57.8003
16.3	-63.5376	-58.1665
16.35	-63.324	-58.0444
16.4	-63.5681	-57.8918
16.45	-63.5986	-58.2275
16.5	-63.5986	-58.136
16.55	-63.3545	-57.9834
16.6	-63.4766	-58.2275
16.65	-63.6597	-58.197
16.7	-63.5071	-58.1055
16.75	-63.4766	-58.0749
16.8	-63.3545	-58.3496
16.85	-63.5986	-58.2275
16.9	-63.5376	-57.9224
16.95	-63.6291	-58.3496
17	-63.2935	-58.3496
17.05	-63.5986	-58.1055
17.1	-63.6902	-58.2275
17.15	-63.5986	-58.2886
17.2	-63.5376	-58.136
17.25	-63.385	-58.0444
17.3	-63.6291	-58.3191
17.35	-63.6902	-58.197
17.4	-63.5986	-57.9834
17.45	-63.4155	-58.2886
17.5	-63.385	-58.2275
17.55	-63.7207	-58.136
17.6	-63.5681	-58.0444
17.65	-63.5986	-58.3191
17.7	-63.324	-58.197
17.75	-63.4155	-57.9834
17.8	-63.6291	-58.1665
17.85	-63.5986	-58.3496
17.9	-63.5376	-58.2886
17.95	-63.4155	-57.9529
18	-63.446	-58.3191
18.05	-63.5681	-58.2275
18.1	-63.6902	-58.197
18.15	-63.5376	-57.9529
18.2	-63.5681	-58.2886
18.25	-63.385	-58.2886
18.3	-63.5986	-58.1055
18.35	-63.6902	-58.0749
18.4	-63.5986	-58.2886
18.45	-63.6291	-58.2275
18.5	-63.4766	-58.1665
18.55	-63.324	-58.136
18.6	-63.5986	-58.3801
18.65	-63.7207	-58.3191
18.7	-63.5681	-58.2581
18.75	-63.5681	-58.0749
18.8	-63.385	-58.3801
18.85	-63.446	-58.2275
18.9	-63.6597	-58.3191
18.95	-63.5681	-58.197
19	-63.5681	-58.4412
19.05	-63.5986	-58.3496
19.1	-63.4766	-58.4106
19.15	-63.446	-58.1665
19.2	-63.5071	-58.3496
19.25	-63.7512	-58.4412
19.3	-63.7207	-58.4412
19.35	-63.5376	-58.2886
19.4	-63.5986	-58.2581
19.45	-63.5681	-58.4412
19.5	-63.4766	-58.4412
19.55	-63.5681	-58.3191
19.6	-63.6597	-58.1665
19.65	-63.7207	-58.3191
19.7	-63.6291	-58.4106
19.75	-63.5986	-58.3801
19.8	-63.4766	-58.2886
19.85	-63.446	-58.2275
19.9	-63.446	-58.4106
19.95	-63.6597	-58.5327
20	-63.6902	-58.4106
20.05	-63.5986	-58.2581
20.1	-63.6291	-58.2581
20.15	-63.5986	-58.5632
20.2	-63.5071	-58.5022
20.25	-63.385	-58.4717
20.3	-63.6597	-58.3191
20.35	-63.7207	-58.2275
20.4	-63.6291	-58.5632
20.45	-63.6291	-58.4717
20.5	-63.5071	-58.4412
20.55	-63.7817	-58.3801
20.6	-63.6902	-58.2275
20.65	-63.6291	-58.4106
20.7	-63.4766	-58.4717
20.75	-63.7817	-58.3496
20.8	-63.6291	-58.4412
20.85	-63.446	-58.3801
20.9	-63.7207	-58.197
20.95	-63.5376	-58.3801
21	-63.6597	-58.5327
21.05	-63.6291	-58.4412
21.1	-63.3545	-58.3191
21.15	-63.7207	-58.1665
21.2	-63.5986	-58.3191
21.25	-63.5986	-58.5022
21.3	-63.6597	-58.5022
21.35	-63.4766	-58.4717
21.4	-63.7512	-58.3801
21.45	-63.6291	-58.3496
21.5	-63.6597	-58.136
21.55	-63.7817	-58.3801
21.6	-63.4766	-58.4717
21.65	-63.8428	-58.4106
21.7	-63.7207	-58.3801
21.75	-63.5071	-58.3191
21.8	-63.8428	-58.1665
21.85	-63.5681	-58.197
21.9	-63.6597	-58.4717
21.95	-63.7817	-58.4106
22	-63.5986	-58.3191
22.05	-63.7512	-58.4106
22.1	-63.6291	-58.2275
22.15	-63.5071	-58.197
22.2	-63.7512	-58.136
22.25	-63.6902	-58.3801
22.3	-63.5681	-58.4106
22.35	-63.7512	-58.3496
22.4	-63.7817	-58.3191
22.45	-63.5986	-58.2886
22.5	-63.7512	-58.1665
22.55	-63.8123	-58.2581
22.6	-63.7207	-58.4106
22.65	-63.6291	-58.3496
22.7	-63.8428	-58.136
22.75	-63.8123	-58.1055
22.8	-63.5986	-58.2275
22.85	-63.9343	-58.136
22.9	-63.7817	-57.8918
22.95	-63.6291	-58.2886
23	-63.7817	-58.0749
23.05	-63.8428	-57.8308
23.1	-63.7207	-58.136
23.15	-63.5071	-58.0139
23.2	-63.8428	-58.0139
23.25	-63.7817	-58.0444
23.3	-63.5986	-57.8613
23.35	-63.6902	-58.1055
23.4	-63.7512	-57.9529
23.45	-63.7512	-58.0444
23.5	-63.5986	-58.1055
23.55	-63.9038	-57.8003
23.6	-63.6902	-58.0749
23.65	-63.7817	-57.8918
23.7	-63.7207	-58.1055
23.75	-63.9648	-58.1665
23.8	-63.8733	-57.7698
23.85	-63.5986	-58.1055
23.9	-63.9343	-57.8918
23.95	-63.8123	-58.0444
24	-63.7817	-57.9224
24.05	-63.5986	-57.5561
24.1	-63.9648	-58.0139
24.15	-63.7817	-57.9529
24.2	-63.7512	-57.7393
24.25	-63.6291	-57.9834
24.3	-63.9038	-57.8918
24.35	-63.8733	-57.8308
24.4	-63.7817	-58.0139
24.45	-63.6291	-57.8613
24.5	-63.9648	-57.8003
24.55	-63.8123	-58.0444
24.6	-63.7207	-57.8613
24.65	-63.5376	-57.8308
24.7	-63.9038	-58.0444
24.75	-63.8428	-57.9834
24.8	-63.8123	-57.8613
24.85	-63.6291	-58.0139
24.9	-63.9343	-57.9834
24.95	-63.9343	-57.8308
25	-63.9038	-58.0749
25.05	-63.6902	-57.9529
25.1	-63.8733	-57.6477
25.15	-63.9954	-58.0444
25.2	-63.8428	-57.9224
25.25	-63.7207	-57.8613
25.3	-63.6902	-57.8613
25.35	-63.9648	-57.9834
25.4	-63.8733	-57.9529
25.45	-63.8733	-57.7393
25.5	-63.7207	-58.0139
25.55	-63.7817	-57.8918
25.6	-63.9954	-57.6782
25.65	-63.8123	-57.9224
25.7	-63.8428	-57.9834
25.75	-63.7817	-57.8918
25.8	-63.8733	-57.8308
25.85	-63.9954	-58.136
25.9	-63.9648	-57.9529
25.95	-63.9343	-57.7393
26	-63.7207	-58.0444
26.05	-63.9648	-58.0749
26.1	-64.0259	-57.8918
26.15	-63.9954	-57.7698
26.2	-64.0259	-58.1055
26.25	-63.7512	-57.9834
26.3	-63.9648	-57.8918
26.35	-64.0869	-57.7393
26.4	-63.9648	-58.0139
26.45	-63.9343	-57.9224
26.5	-63.7817	-57.7393
26.55	-63.8733	-57.8918
26.6	-64.0869	-57.9834
26.65	-64.0564	-57.9529
26.7	-63.9648	-57.7393
26.75	-63.8733	-57.9834
26.8	-63.7817	-57.9529
26.85	-63.9954	-57.9529
26.9	-64.0869	-57.6782
26.95	-63.9343	-57.9224
27	-64.1174	-57.9224
27.05	-63.9038	-57.8613
27.1	-63.7817	-57.8003
27.15	-64.0259	-57.8613
27.2	-64.2395	-57.9529
27.25	-64.1174	-57.9224
27.3	-64.0259	-57.7393
27.35	-64.0259	-57.8613
27.4	-63.9343	-57.9224
27.45	-64.0869	-57.9224
27.5	-64.209	-57.7698
27.55	-64.1785	-57.7393
27.6	-64.1174	-57.9224
27.65	-64.0869	-57.8003
27.7	-64.0869	-57.8003
27.75	-63.9038	-57.5867
27.8	-64.1174	-57.9224
27.85	-64.2395	-57.8613
27.9	-64.2395	-57.8613
27.95	-64.0869	-57.7087
28	-64.1174	-57.7087
28.05	-64.0869	-57.9529
28.1	-63.9343	-57.8613
28.15	-64.0564	-57.8918
28.2	-64.209	-57.6172
28.25	-64.331	-57.7698
28.3	-64.209	-57.8918
28.35	-64.1479	-57.7698
28.4	-64.209	-57.7393
28.45	-64.0259	-57.4341
28.5	-63.9954	-57.7087
28.55	-64.1479	-57.8003
28.6	-64.27	-57.6782
28.65	-64.1479	-57.6172
28.7	-64.27	-57.4036
28.75	-63.9954	-57.5561
28.8	-64.0564	-57.7087
28.85	-64.3005	-57.6477
28.9	-64.1785	-57.6477
28.95	-64.0259	-57.4951
29	-64.1479	-57.4036
29.05	-64.209	-57.7087
29.1	-64.209	-57.6782
29.15	-64.1479	-57.5867
29.2	-64.27	-57.5256
29.25	-64.0564	-57.2815
29.3	-64.331	-57.4341
29.35	-64.3005	-57.6477
29.4	-63.9648	-57.4951
29.45	-64.3921	-57.4646
29.5	-64.3005	-57.312
29.55	-64.2395	-57.251
29.6	-64.2395	-57.4646
29.65	-64.0259	-57.5561
29.7	-64.3921	-57.4036
29.75	-64.1785	-57.4341
29.8	-64.1479	-57.3425
29.85	-64.1479	-57.1899
29.9	-64.0564	-57.4036
29.95	-64.27	-57.5561
30	-64.209	-57.6477
30.05	-63.9648	-57.4646
30.1	-64.2395	-57.4951
30.15	-64.1174	-57.4341
30.2	-64.0869	-57.373
30.25	-64.209	-57.5561
30.3	-64.1174	-57.6172
30.35	-64.2395	-57.5561
30.4	-64.2395	-57.4951
30.45	-64.1174	-57.4951
30.5	-64.1785	-57.4036
30.55	-64.3005	-57.2815
30.6	-64.209	-57.4646
30.65	-64.1479	-57.5867
30.7	-64.2395	-57.5561
30.75	-64.27	-57.4646
30.8	-64.0564	-57.4951
30.85	-64.3005	-57.373
30.9	-64.1785	-57.4036
30.95	-63.9954	-57.4951
31	-64.27	-57.373
31.05	-64.27	-57.373
31.1	-64.0259	-57.312
31.15	-64.209	-57.5256
31.2	-64.3005	-57.4646
31.25	-64.209	-57.251
31.3	-64.0869	-57.6172
31.35	-64.331	-57.4646
31.4	-64.2395	-57.2815
31.45	-64.0259	-57.5867
31.5	-64.27	-57.5561
31.55	-64.3005	-57.373
31.6	-64.1785	-57.5256
31.65	-63.9954	-57.1899
31.7	-64.27	-57.5256
31.75	-64.1785	-57.3425
31.8	-64.1785	-57.4341
31.85	-64.2395	-57.4341
31.9	-64.3005	-57.1594
31.95	-64.1785	-57.4951
32	-63.9648	-57.251
32.05	-64.2395	-57.4646
32.1	-64.2395	-57.4646
32.15	-64.1479	-57.2205
32.2	-63.9343	-57.4341
32.25	-64.27	-57.251
32.3	-64.1479	-57.6782
32.35	-64.1479	-57.4951
32.4	-63.9954	-57.2815
32.45	-64.4226	-57.5867
32.5	-64.1785	-57.4341
32.55	-64.0869	-57.4036
32.6	-63.9648	-57.4036
32.65	-64.3005	-57.3425
32.7	-64.1785	-57.4341
32.75	-64.0259	-57.4341
32.8	-63.9648	-57.2815
32.85	-64.3616	-57.312
32.9	-64.209	-57.4341
32.95	-64.1479	-57.2205
33	-63.9038	-57.4036
33.05	-64.2395	-57.2815
33.1	-64.1479	-57.251
33.15	-64.1785	-57.373
33.2	-63.8733	-57.4341
33.25	-64.0869	-57.3425
33.3	-64.2395	-57.2205
33.35	-64.1785	-57.4951
33.4	-63.9038	-57.373
33.45	-63.9343	-57.1594
33.5	-64.27	-57.5256
33.55	-64.1174	-57.4341
33.6	-63.9954	-57.2205
33.65	-63.8428	-57.373
33.7	-64.1479	-57.312
33.75	-64.209	-57.2815
33.8	-64.0259	-57.4036
33.85	-63.9648	-57.3425
33.9	-63.9038	-57.251
33.95	-64.1785	-57.1899
34	-64.0564	-57.4341
34.05	-63.9954	-57.3425
34.1	-63.9343	-57.0679
34.15	-63.8428	-57.373
34.2	-64.0564	-57.2815
34.25	-64.0564	-57.251
34.3	-64.0259	-57.1289
34.35	-63.9038	-57.373
34.4	-63.8428	-57.3425
34.45	-63.9954	-57.1289
34.5	-63.9954	-57.312
34.55	-64.0259	-57.312
34.6	-63.8428	-57.373
34.65	-63.8123	-57.0679
34.7	-64.0259	-57.4341
34.75	-64.1785	-57.251
34.8	-64.0259	-57.2205
34.85	-64.0259	-57.251
34.9	-63.9038	-57.373
34.95	-63.9038	-57.251
35	-64.1785	-57.2205
35.05	-64.0564	-57.1899
35.1	-64.0259	-57.373
35.15	-64.0259	-57.2815
35.2	-63.9343	-57.0984
35.25	-63.8733	-57.2205
35.3	-64.0869	-57.2815
35.35	-64.1174	-57.2205
35.4	-64.0564	-57.0679
35.45	-64.0259	-57.2205
35.5	-63.9038	-57.312
35.55	-63.8428	-57.3425
35.6	-64.0564	-57.1289
35.65	-64.1479	-57.312
35.7	-64.0259	-57.373
35.75	-63.9954	-57.312
35.8	-64.0564	-57.1899
35.85	-63.7817	-57.1899
35.9	-63.9648	-57.4951
35.95	-64.1785	-57.251
36	-64.209	-57.1594
36.05	-64.0869	-57.1594
36.1	-64.0869	-57.4341
36.15	-63.9648	-57.2815
36.2	-63.9038	-57.251
36.25	-63.9954	-57.1594
36.3	-64.0259	-57.251
36.35	-64.1785	-57.4036
36.4	-64.1174	-57.2815
36.45	-64.0869	-57.2815
36.5	-64.0869	-57.1289
36.55	-63.9954	-57.4646
36.6	-63.8428	-57.4341
36.65	-63.9648	-57.3425
36.7	-64.1785	-57.312
36.75	-64.1785	-57.1899
36.8	-64.0564	-57.4341
36.85	-64.1479	-57.4341
36.9	-64.1785	-57.4646
36.95	-64.0564	-57.373
37	-63.9343	-57.1594
37.05	-64.2395	-57.5256
37.1	-64.3005	-57.4646
37.15	-64.1785	-57.5256
37.2	-63.9648	-57.373
37.25	-64.1174	-57.2205
37.3	-64.27	-57.4951
37.35	-64.1174	-57.4951
37.4	-63.9648	-57.4341
37.45	-64.3005	-57.373
37.5	-64.1785	-57.251
37.55	-64.0259	-57.4036
37.6	-64.1479	-57.5561
37.65	-64.0869	-57.4341
37.7	-64.1479	-57.4341
37.75	-64.209	-57.4036
37.8	-63.8733	-57.1594
37.85	-64.1785	-57.4951
37.9	-64.1174	-57.5561
37.95	-64.2395	-57.5256
38	-64.1479	-57.4646
38.05	-63.8428	-57.3425
38.1	-64.27	-57.2205
38.15	-64.1479	-57.6172
38.2	-64.1479	-57.6172
38.25	-64.1479	-57.4951
38.3	-63.9038	-57.4951
38.35	-64.331	-57.4341
38.4	-64.1479	-57.3425
38.45	-63.9954	-57.4341
38.5	-64.331	-57.5256
38.55	-64.0869	-57.5867
38.6	-64.0259	-57.4646
38.65	-64.1174	-57.4341
38.7	-63.9954	-57.4036
38.75	-64.0869	-57.251
38.8	-64.1174	-57.4646
38.85	-63.9038	-57.6172
38.9	-63.9954	-57.5256
38.95	-64.0564	-57.4341
39	-63.9954	-57.5561
39.05	-63.9648	-57.373
39.1	-64.0564	-57.251
39.15	-63.9954	-57.4646
39.2	-63.9038	-57.6172
39.25	-64.1785	-57.5867
39.3	-64.0259	-57.312
39.35	-63.8428	-57.4036
39.4	-64.1785	-57.6782
39.45	-64.0259	-57.6477
39.5	-63.8428	-57.373
39.55	-64.0564	-57.5256
39.6	-64.209	-57.5561
39.65	-63.9954	-57.4951
39.7	-63.8733	-57.6172
39.75	-64.209	-57.5256
39.8	-64.0564	-57.3425
39.85	-63.8733	-57.7087
39.9	-64.0259	-57.5867
39.95	-64.0564	-57.4341
40	-63.9343	-57.5867
40.05	-63.8428	-57.373
40.1	-64.1174	-57.7393
40.15	-64.0259	-57.5561
40.2	-63.9038	-57.4646
40.25	-63.9954	-57.6477
40.3	-64.1174	-57.3425
40.35	-64.0259	-57.7393
40.4	-63.8428	-57.6477
40.45	-64.1479	-57.7087
40.5	-63.9343	-57.7087
40.55	-63.9343	-57.4036
40.6	-63.7817	-57.6477
40.65	-64.1479	-57.5867
40.7	-63.9343	-57.6782
40.75	-63.8733	-57.6782
40.8	-63.8428	-57.4036
40.85	-64.1174	-57.7698
40.9	-63.9648	-57.6477
40.95	-63.9038	-57.4646
41	-63.7817	-57.8003
41.05	-64.0869	-57.6782
41.1	-64.0259	-57.4951
41.15	-63.8123	-57.8308
41.2	-63.7817	-57.7393
41.25	-64.1174	-57.5561
41.3	-63.9648	-57.9224
41.35	-63.9648	-57.8308
41.4	-63.7512	-57.4341
41.45	-64.1785	-57.8918
41.5	-63.9954	-57.8308
41.55	-63.9954	-57.6172
41.6	-63.8428	-57.8918
41.65	-64.1174	-57.7393
41.7	-64.209	-57.7087
41.75	-64.1174	-57.8003
41.8	-63.9038	-57.8613
41.85	-63.9343	-57.7087
41.9	-64.1785	-57.6172
41.95	-63.9954	-57.8918
42	-63.9038	-57.7698
42.05	-63.7817	-57.5867
42.1	-63.9648	-57.8308
42.15	-64.1174	-57.8918
42.2	-63.9954	-57.5867
42.25	-63.9038	-57.8613
42.3	-63.7817	-57.8003
42.35	-64.1174	-57.8308
42.4	-64.0564	-57.5867
42.45	-64.0564	-57.9529
42.5	-63.9954	-57.8613
42.55	-63.9038	-57.6477
42.6	-64.1785	-57.8918
42.65	-64.0869	-57.8918
42.7	-64.209	-57.7393
42.75	-64.0869	-57.5867
42.8	-63.8733	-57.8918
42.85	-64.0869	-57.8308
42.9	-64.209	-57.6172
42.95	-64.1479	-57.7393
43	-63.9648	-57.8308
43.05	-63.9343	-57.7698
43.1	-64.1479	-57.4646
43.15	-64.209	-57.6172
43.2	-64.0564	-57.7698
43.25	-64.0564	-57.7087
43.3	-63.9343	-57.4951
43.35	-63.9648	-57.7698
43.4	-64.1785	-57.8308
43.45	-64.1479	-57.6782
43.5	-64.0259	-57.5561
43.55	-64.0259	-57.8308
43.6	-63.8123	-57.8003
43.65	-63.9648	-57.7698
43.7	-64.1785	-57.4341
43.75	-64.1785	-57.7698
43.8	-64.1174	-57.8003
43.85	-64.0259	-57.7393
43.9	-63.8733	-57.4341
43.95	-63.9343	-57.7393
44	-64.1785	-57.7393
44.05	-64.1785	-57.7087
44.1	-64.0564	-57.4951
44.15	-64.1785	-57.6172
44.2	-63.9648	-57.7698
44.25	-63.9038	-57.7393
44.3	-63.9343	-57.6172
44.35	-64.1785	-57.5867
44.4	-64.1479	-57.8308
44.45	-64.1479	-57.6477
44.5	-64.0564	-57.6172
44.55	-63.9343	-57.373
44.6	-63.9038	-57.6782
44.65	-64.0259	-57.8003
44.7	-64.1479	-57.8003
44.75	-64.1785	-57.5256
44.8	-64.1785	-57.4036
44.85	-64.1174	-57.7698
44.9	-64.0564	-57.7087
44.95	-63.9648	-57.5561
45	-63.9648	-57.4646
45.05	-64.1174	-57.5867
45.1	-64.0869	-57.7698
45.15	-64.2395	-57.5867
45.2	-64.1174	-57.4951
45.25	-64.1479	-57.4646
45.3	-63.9648	-57.5256
45.35	-63.9038	-57.6782
45.4	-64.1785	-57.5561
45.45	-64.1479	-57.5561
45.5	-64.0564	-57.4341
45.55	-63.8733	-57.4646
45.6	-64.0869	-57.6477
45.65	-64.1174	-57.6172
45.7	-63.9954	-57.7393
45.75	-63.9954	-57.5867
45.8	-64.0869	-57.373
45.85	-64.0869	-57.7087
45.9	-63.9038	-57.8308
45.95	-64.0259	-57.6172
46	-63.9038	-57.5561
46.05	-64.1174	-57.4951
46.1	-64.0869	-57.4951
46.15	-63.7512	-57.7393
46.2	-64.0869	-57.7393
46.25	-63.9343	-57.6172
46.3	-64.1785	-57.6172
46.35	-63.9954	-57.4646
46.4	-63.7207	-57.5256
46.45	-64.0259	-57.6782
46.5	-63.8123	-57.7393
46.55	-64.0259	-57.7087
46.6	-63.9954	-57.7087
46.65	-63.7207	-57.5867
46.7	-64.0259	-57.5256
46.75	-63.9648	-57.7087
46.8	-63.9038	-57.8308
46.85	-63.9648	-57.8003
46.9	-63.9038	-57.8308
46.95	-64.0259	-57.8003
47	-64.0259	-57.8003
47.05	-63.8123	-57.5867
47.1	-64.1785	-57.7698
47.15	-64.0259	-57.9529
47.2	-63.7512	-57.8918
47.25	-64.0564	-57.8308
47.3	-64.0259	-57.8308
47.35	-63.8733	-57.9224
47.4	-63.9038	-57.7087
47.45	-63.9954	-57.9224
47.5	-63.9038	-57.9529
47.55	-63.8733	-57.9224
47.6	-63.9954	-57.9529
47.65	-63.8428	-57.7698
47.7	-63.6291	-57.9224
47.75	-64.0564	-58.0139
47.8	-63.9343	-58.0139
47.85	-63.7512	-57.8003
47.9	-63.9648	-58.0749
47.95	-63.9343	-57.9834
48	-63.8123	-57.7087
48.05	-63.7512	-58.1665
48.1	-64.0869	-57.9834
48.15	-64.0869	-57.8308
48.2	-63.7817	-57.9834
48.25	-63.9648	-57.8918
48.3	-64.0259	-58.1055
48.35	-63.9343	-57.9834
48.4	-63.8733	-57.8308
48.45	-63.9954	-58.0749
48.5	-63.9954	-57.8308
48.55	-63.7512	-58.1055
48.6	-63.9648	-57.9529
48.65	-63.9343	-57.9834
48.7	-63.8428	-58.0139
48.75	-63.6597	-57.7087
48.8	-63.9648	-58.0444
48.85	-63.9038	-57.9834
48.9	-63.7817	-57.9834
48.95	-63.7207	-58.0444
49	-64.0259	-57.6477
49.05	-63.8428	-58.136
49.1	-63.7512	-57.9834
49.15	-63.7207	-57.8613
49.2	-64.1479	-58.1055
49.25	-63.9038	-57.9834
49.3	-63.8733	-57.9224
49.35	-63.8123	-57.9834
49.4	-64.0869	-57.9529
49.45	-63.9954	-57.9834
49.5	-63.7817	-58.1055
49.55	-63.6902	-57.8308
49.6	-64.0259	-57.9224
49.65	-63.9648	-57.9834
49.7	-63.8123	-57.9834
49.75	-63.6597	-57.8613
49.8	-63.9954	-58.0749
49.85	-63.9038	-57.8918
49.9	-63.8733	-57.9224
49.95	-63.5376	-58.1055
50	-63.8428	-58.0749
50.05	-63.9038	-57.8003
50.1	-63.8733	-58.1665
50.15	-63.6902	-58.136
50.2	-63.7207	-57.8308
50.25	-63.9954	-58.1665
50.3	-63.8428	-58.197
50.35	-63.8123	-58.0444
50.4	-63.6291	-58.0139
50.45	-63.9648	-58.197
50.5	-64.0564	-58.136
50.55	-63.8428	-57.9224
50.6	-63.7817	-58.136
50.65	-63.6902	-58.1055
50.7	-64.0259	-58.0444
50.75	-63.8733	-58.0749
50.8	-63.8428	-58.2581
50.85	-63.7512	-58.0444
50.9	-63.5986	-57.8613
50.95	-63.8428	-58.1665
51	-63.8123	-58.1055
51.05	-63.7512	-58.0139
51.1	-63.5681	-57.9834
51.15	-63.5681	-58.2581
51.2	-63.7817	-58.136
51.25	-63.7817	-57.9224
51.3	-63.7512	-58.1665
51.35	-63.6902	-58.2886
51.4	-63.446	-58.1665
51.45	-63.6902	-57.9529
51.5	-63.9343	-58.2886
51.55	-63.7512	-58.1665
51.6	-63.6597	-58.1665
51.65	-63.5071	-58.0139
51.7	-63.6291	-58.2581
51.75	-63.8733	-58.2275
51.8	-63.7817	-58.0444
51.85	-63.7512	-58.0749
51.9	-63.6291	-58.2886
51.95	-63.5681	-58.2581
52	-63.5376	-58.0139
52.05	-63.7207	-58.0139
52.1	-63.7817	-58.197
52.15	-63.6597	-58.197
52.2	-63.6902	-58.1665
52.25	-63.4155	-58.0749
52.3	-63.5071	-58.3496
52.35	-63.6902	-58.197
52.4	-63.7512	-58.2581
52.45	-63.6597	-58.0749
52.5	-63.6291	-58.3496
52.55	-63.6291	-58.3496
52.6	-63.3545	-58.3496
52.65	-63.5986	-58.136
52.7	-63.6902	-58.2275
52.75	-63.8123	-58.4106
52.8	-63.6902	-58.3801
52.85	-63.6902	-58.2581
52.9	-63.6291	-58.1055
52.95	-63.5376	-58.4106
53	-63.5986	-58.4106
53.05	-63.7512	-58.3191
53.1	-63.8428	-58.1665
53.15	-63.8123	-58.2275
53.2	-63.7817	-58.5022
53.25	-63.6902	-58.3801
53.3	-63.6291	-58.4412
53.35	-63.5681	-58.136
53.4	-63.5986	-58.3496
53.45	-63.7512	-58.6243
53.5	-63.8123	-58.4412
53.55	-63.7207	-58.4106
53.6	-63.8123	-58.2581
53.65	-63.6902	-58.5022
53.7	-63.5071	-58.6548
53.75	-63.6902	-58.4412
53.8	-63.9648	-58.4412
53.85	-63.8123	-58.2886
53.9	-63.6597	-58.3801
53.95	-63.7207	-58.6243
54	-63.8733	-58.4106
54.05	-63.8123	-58.4717
54.1	-63.5376	-58.3801
54.15	-63.8733	-58.2581
54.2	-63.6597	-58.4412
54.25	-63.6597	-58.5022
54.3	-63.6902	-58.4106
54.35	-63.5071	-58.4106
54.4	-63.7512	-58.3496
54.45	-63.7207	-58.3191
54.5	-63.4766	-58.5937
54.55	-63.7207	-58.5022
54.6	-63.5071	-58.4106
54.65	-63.7817	-58.3496
54.7	-63.6597	-58.3801
54.75	-63.5681	-58.3801
54.8	-63.6902	-58.5327
54.85	-63.5681	-58.5327
54.9	-63.8428	-58.4717
54.95	-63.7207	-58.4412
55	-63.5376	-58.197
55.05	-63.7512	-58.136
55.1	-63.5376	-58.4106
55.15	-63.6291	-58.4412
55.2	-63.5986	-58.3191
55.25	-63.385	-58.3801
55.3	-63.7512	-58.2275
55.35	-63.5986	-58.136
55.4	-63.324	-58.1055
55.45	-63.6597	-58.2275
55.5	-63.5681	-58.3496
55.55	-63.324	-58.4106
55.6	-63.6597	-58.2581
55.65	-63.5071	-58.2581
55.7	-63.2935	-58.197
55.75	-63.6291	-58.1665
55.8	-63.446	-58.3191
55.85	-63.1409	-58.3801
55.9	-63.6597	-58.2886
55.95	-63.4766	-58.2886
56	-63.324	-58.1665
56.05	-63.5071	-58.3191
56.1	-63.5071	-58.2886
56.15	-63.4155	-58.197
56.2	-63.2324	-58.136
56.25	-63.4766	-58.2886
56.3	-63.446	-58.1665
56.35	-63.2629	-58.1055
56.4	-63.4766	-58.2886
56.45	-63.385	-58.1055
56.5	-63.385	-58.136
56.55	-63.385	-58.197
56.6	-63.4766	-57.9834
56.65	-63.324	-58.2581
56.7	-63.1714	-58.0444
56.75	-63.5071	-58.2275
56.8	-63.3545	-58.197
56.85	-63.2324	-57.9834
56.9	-63.324	-58.2275
56.95	-63.4766	-58.0444
57	-63.324	-58.2275
57.05	-63.1103	-58.197
57.1	-63.446	-57.9529
57.15	-63.446	-58.136
57.2	-63.3545	-58.0139
57.25	-63.2324	-58.197
57.3	-63.5071	-58.1665
57.35	-63.4155	-57.8308
57.4	-63.324	-58.136
57.45	-63.2629	-57.9834
57.5	-63.4766	-58.0139
57.55	-63.446	-58.0139
57.6	-63.1714	-57.9529
57.65	-63.324	-58.0749
57.7	-63.4155	-58.1055
57.75	-63.324	-57.9529
57.8	-63.1103	-58.0749
57.85	-63.324	-58.136
57.9	-63.4155	-57.9224
57.95	-63.3545	-58.0444
58	-63.2019	-58.0749
58.05	-63.324	-58.0444
58.1	-63.446	-57.9834
58.15	-63.2935	-58.0444
58.2	-63.2324	-58.0749
58.25	-63.385	-57.8613
58.3	-63.4155	-58.2275
58.35	-63.324	-58.0444
58.4	-63.324	-57.7698
58.45	-63.2629	-58.1665
58.5	-63.385	-58.0444
58.55	-63.2324	-57.8003
58.6	-63.2629	-58.0139
58.65	-63.0493	-57.9529
58.7	-63.385	-57.8613
58.75	-63.2935	-57.8613
58.8	-63.2629	-58.0749
58.85	-63.1714	-57.9834
58.9	-63.2019	-57.7698
58.95	-63.385	-58.0444
59	-63.324	-57.9224
59.05	-63.2629	-57.8918
59.1	-63.0798	-57.9224
59.15	-63.2019	-58.1055
59.2	-63.2935	-57.8918
59.25	-63.324	-57.6477
59.3	-63.2935	-58.0749
59.35	-63.1103	-58.0139
59.4	-63.2629	-57.8003
59.45	-63.4155	-57.7393
59.5	-63.324	-58.0139
59.55	-63.2324	-57.9224
59.6	-63.0493	-57.7698
59.65	-63.2935	-57.8003
59.7	-63.446	-58.0139
59.75	-63.2629	-57.8918
59.8	-63.2324	-57.6782
59.85	-63.1103	-57.8308
59.9	-63.2629	-57.8918
59.95	-63.385	-57.8613
60	-63.2629	-57.5867
60.05	-63.2935	-57.8918
60.1	-63.2324	-57.8613
60.15	-63.0493	-57.8918
60.2	-63.324	-57.6477
60.25	-63.2935	-57.9529
60.3	-63.324	-57.8918
60.35	-63.324	-57.8613
60.4	-63.1409	-57.6477
60.45	-63.1714	-57.8308
60.5	-63.385	-57.8918
60.55	-63.385	-57.9529
60.6	-63.324	-57.7087
60.65	-63.324	-57.8003
60.7	-63.2324	-57.8613
60.75	-63.1409	-57.8918
60.8	-63.2935	-57.6782
60.85	-63.2935	-57.7393
60.9	-63.324	-57.9224
60.95	-63.2324	-57.8003
61	-63.2324	-57.7393
61.05	-62.9578	-57.5867
61.1	-63.1409	-57.8613
61.15	-63.324	-57.8308
61.2	-63.385	-57.8003
61.25	-63.2629	-57.6782
61.3	-63.2629	-57.5867
61.35	-63.2935	-57.8613
61.4	-63.0798	-57.7698
61.45	-63.1409	-57.8003
61.5	-63.385	-57.5256
61.55	-63.446	-57.7698
61.6	-63.3545	-57.8918
61.65	-63.2935	-57.7698
61.7	-63.324	-57.6782
61.75	-63.1714	-57.4646
61.8	-63.2019	-57.7393
61.85	-63.2629	-57.8308
61.9	-63.4155	-57.7087
61.95	-63.385	-57.6782
62	-63.3545	-57.4951
62.05	-63.2629	-57.5867
62.1	-63.1409	-57.7393
62.15	-63.4155	-57.6172
62.2	-63.324	-57.5867
62.25	-63.2324	-57.5256
62.3	-63.1409	-57.4951
62.35	-63.446	-57.6477
62.4	-63.3545	-57.6172
62.45	-62.9883	-57.6782
62.5	-63.385	-57.5561
62.55	-63.3545	-57.4341
62.6	-63.1714	-57.5561
62.65	-63.4155	-57.7087
62.7	-63.2629	-57.7087
62.75	-63.3545	-57.5561
62.8	-63.4155	-57.4646
62.85	-63.1103	-57.373
62.9	-63.4766	-57.4951
62.95	-63.324	-57.6477
63	-63.4155	-57.5561
63.05	-63.4155	-57.5256
63.1	-63.1409	-57.4341
63.15	-63.446	-57.373
63.2	-63.2324	-57.373
63.25	-63.3545	-57.5867
63.3	-63.324	-57.5867
63.35	-63.0188	-57.4341
63.4	-63.4155	-57.4951
63.45	-63.4155	-57.312
63.5	-63.2324	-57.312
63.55	-63.446	-57.4341
63.6	-63.2019	-57.6477
63.65	-63.5071	-57.5867
63.7	-63.3545	-57.5867
63.75	-63.0798	-57.5867
63.8	-63.4155	-57.4951
63.85	-63.4155	-57.3425
63.9	-63.2324	-57.4341
63.95	-63.4766	-57.6782
64	-63.3545	-57.6477
64.05	-63.2629	-57.5561
64.1	-63.446	-57.5867
64.15	-63.3545	-57.4646
64.2	-63.1409	-57.251
64.25	-63.4155	-57.5256
64.3	-63.2935	-57.5867
64.35	-63.2629	-57.5561
64.4	-63.0798	-57.2815
64.45	-63.4766	-57.5256
64.5	-63.385	-57.4951
64.55	-63.1409	-57.5867
64.6	-63.4766	-57.4646
64.65	-63.2935	-57.6477
64.7	-63.2629	-57.4951
64.75	-63.4155	-57.5561
64.8	-63.446	-57.6172
64.85	-63.324	-57.4341
64.9	-63.2935	-57.7087
64.95	-63.6291	-57.6477
65	-63.385	-57.4951
65.05	-63.4155	-57.5867
65.1	-63.5681	-57.4646
65.15	-63.5071	-57.7393
65.2	-63.3545	-57.6477
65.25	-63.2935	-57.5561
65.3	-63.6291	-57.5867
65.35	-63.5681	-57.312
65.4	-63.3545	-57.6782
65.45	-63.446	-57.5867
65.5	-63.6291	-57.5561
65.55	-63.5681	-57.5867
65.6	-63.2324	-57.4036
65.65	-63.6597	-57.6782
65.7	-63.5376	-57.5867
65.75	-63.5071	-57.4036
65.8	-63.2629	-57.7698
65.85	-63.7512	-57.6172
65.9	-63.5681	-57.5256
65.95	-63.5681	-57.7087
66	-63.4155	-57.6172
66.05	-63.7207	-57.6477
66.1	-63.5681	-57.6477
66.15	-63.5681	-57.6172
66.2	-63.5376	-57.5561
66.25	-63.7207	-57.7087
66.3	-63.6597	-57.5256
66.35	-63.5986	-57.5867
66.4	-63.5681	-57.7087
66.45	-63.7512	-57.6172
66.5	-63.6902	-57.5867
66.55	-63.6597	-57.7393
66.6	-63.4155	-57.6477
66.65	-63.8428	-57.4951
66.7	-63.6597	-57.7698
66.75	-63.6902	-57.6782
66.8	-63.4766	-57.4341
66.85	-63.6902	-57.7698
66.9	-63.7817	-57.6782
66.95	-63.6902	-57.5256
67	-63.6902	-57.5561
67.05	-63.5986	-57.8308
67.1	-63.7512	-57.8003
67.15	-63.7207	-57.312
67.2	-63.7817	-57.7087
67.25	-63.6597	-57.5561
67.3	-63.6902	-57.5256
67.35	-63.7817	-57.5256
67.4	-63.8123	-57.6477
67.45	-63.6291	-57.6172
67.5	-63.5071	-57.312
67.55	-63.7817	-57.6477
67.6	-63.7512	-57.6172
67.65	-63.6902	-57.4951
67.7	-63.5681	-57.4646
67.75	-63.4766	-57.6782
67.8	-63.8123	-57.6172
67.85	-63.7207	-57.3425
67.9	-63.6902	-57.6477
67.95	-63.5681	-57.5867
68	-63.4766	-57.5256
68.05	-63.8123	-57.4036
68.1	-63.7817	-57.6172
68.15	-63.6902	-57.6477
68.2	-63.6291	-57.5256
68.25	-63.6597	-57.2815
68.3	-63.8733	-57.6172
68.35	-63.8428	-57.6477
68.4	-63.8123	-57.4951
68.45	-63.7512	-57.312
68.5	-63.7207	-57.6477
68.55	-63.6597	-57.5561
68.6	-63.8428	-57.4951
68.65	-63.8123	-57.312
68.7	-63.7817	-57.5867
68.75	-63.7512	-57.4951
68.8	-63.5681	-57.5256
68.85	-63.6902	-57.251
68.9	-63.9343	-57.5256
68.95	-63.9038	-57.5867
69	-63.9038	-57.5867
69.05	-63.7817	-57.312
69.1	-63.7817	-57.5256
69.15	-63.7817	-57.7698
69.2	-63.9954	-57.6782
69.25	-64.0259	-57.4341
69.3	-63.9954	-57.4341
69.35	-64.0259	-57.7087
69.4	-63.8733	-57.6477
69.45	-63.8428	-57.5867
69.5	-63.9648	-57.3425
69.55	-64.0564	-57.5561
69.6	-63.9954	-57.6782
69.65	-63.9038	-57.5256
69.7	-63.9954	-57.4646
69.75	-63.8733	-57.312
69.8	-63.6902	-57.6477
69.85	-63.8123	-57.7087
69.9	-64.0259	-57.6477
69.95	-64.0259	-57.5256
70	-63.9343	-57.5561
70.05	-63.9343	-57.7393
70.1	-63.9038	-57.7393
70.15	-63.9648	-57.6782
70.2	-63.7817	-57.6782
70.25	-63.9648	-57.6477
70.3	-64.0869	-57.8003
70.35	-64.1174	-57.8003
70.4	-64.0259	-57.8613
70.45	-63.8123	-57.7087
70.5	-63.9648	-57.4646
70.55	-64.1785	-57.8003
70.6	-64.0869	-57.9224
70.65	-63.7512	-57.8003
70.7	-64.0564	-57.7698
70.75	-64.0564	-57.5867
70.8	-63.9343	-57.7087
70.85	-64.1479	-57.8003
70.9	-64.0564	-57.8308
70.95	-63.8123	-57.7087
71	-64.0869	-57.6782
71.05	-64.0259	-57.5561
71.1	-63.9954	-57.7087
71.15	-63.9954	-57.8918
71.2	-63.8123	-57.8003
71.25	-64.1174	-57.8003
71.3	-63.9954	-57.8003
71.35	-63.9038	-57.6477
71.4	-64.0869	-57.6782
71.45	-63.8428	-57.9529
71.5	-64.1174	-57.9529
71.55	-63.9648	-57.8003
71.6	-64.0259	-57.8308
71.65	-63.9954	-57.7087
71.7	-63.6902	-57.6172
71.75	-64.0869	-57.7698
71.8	-63.9343	-57.9224
71.85	-63.9954	-57.9224
71.9	-63.9343	-57.8308
71.95	-63.7512	-57.8308
72	-63.9954	-57.6172
72.05	-63.9038	-57.5561
72.1	-63.6902	-57.7087
72.15	-63.9954	-57.8918
72.2	-63.9038	-57.8918
72.25	-63.6597	-57.8003
72.3	-63.9343	-57.8613
72.35	-63.9038	-57.7698
72.4	-63.5986	-57.6477
72.45	-63.9954	-57.6477
72.5	-63.8733	-57.9529
72.55	-63.6597	-57.8918
72.6	-63.9038	-57.7698
72.65	-63.9343	-57.7698
72.7	-63.7207	-57.7393
72.75	-63.8733	-57.9834
72.8	-63.9648	-57.8308
72.85	-63.8428	-57.6477
72.9	-63.7512	-57.8918
72.95	-63.8428	-57.8308
73	-63.8733	-57.5561
73.05	-63.6291	-57.8308
73.1	-63.9038	-57.8003
73.15	-63.8428	-57.5256
73.2	-63.5681	-57.8918
73.25	-63.7817	-57.7393
73.3	-63.8123	-57.7393
73.35	-63.7207	-57.8308
73.4	-63.6291	-57.6172
73.45	-63.8123	-57.8918
73.5	-63.8733	-57.7393
73.55	-63.5681	-57.8918
73.6	-63.8733	-57.8613
73.65	-63.7817	-57.5561
73.7	-63.8123	-57.8918
73.75	-63.6291	-57.8003
73.8	-63.8428	-57.9529
73.85	-63.8123	-57.8308
73.9	-63.6597	-57.6172
73.95	-63.8428	-57.9834
74	-63.8733	-57.8308
74.05	-63.7817	-57.7393
74.1	-63.5376	-57.8308
74.15	-63.8733	-57.8003
74.2	-63.8123	-57.8308
74.25	-63.7207	-57.9529
74.3	-63.5681	-57.7087
74.35	-63.8733	-57.8613
74.4	-63.7817	-57.8918
74.45	-63.6902	-57.6782
74.5	-63.6902	-57.9834
74.55	-63.9648	-57.9529
74.6	-63.8733	-57.8918
74.65	-63.7207	-58.0139
74.7	-63.7207	-57.9834
74.75	-64.0869	-57.8308
74.8	-63.9343	-57.9529
74.85	-63.7207	-58.1665
74.9	-63.7817	-57.9224
74.95	-64.0259	-57.8308
75	-63.9038	-58.1055
75.05	-63.7817	-58.0139
75.1	-63.7207	-57.8308
75.15	-64.0564	-58.1055
75.2	-63.9648	-58.136
75.25	-63.8733	-57.8918
75.3	-63.6291	-58.0444
75.35	-63.9343	-58.0749
75.4	-63.9343	-57.9529
75.45	-63.9038	-57.8003
75.5	-63.5986	-58.136
75.55	-63.8428	-58.0444
75.6	-64.0564	-57.8003
75.65	-63.9648	-58.1055
75.7	-63.8123	-58.1055
75.75	-63.7207	-58.0749
75.8	-64.0564	-57.8918
75.85	-64.1174	-58.2581
75.9	-63.9648	-58.1665
75.95	-63.9648	-58.0139
76	-63.8733	-58.0749
76.05	-64.1479	-58.2275
76.1	-64.0259	-58.197
76.15	-63.9648	-57.9224
76.2	-63.8428	-58.1665
76.25	-63.9648	-58.2886
76.3	-64.1174	-58.1665
76.35	-64.0564	-57.9834
76.4	-64.0564	-58.2275
76.45	-63.9038	-58.197
76.5	-63.8733	-58.1665
76.55	-64.1174	-58.0749
76.6	-64.1174	-58.3496
76.65	-64.0564	-58.2275
76.7	-63.9648	-58.197
76.75	-63.9038	-58.0444
76.8	-64.1174	-58.3191
76.85	-64.1785	-58.3191
76.9	-64.0564	-58.2275
76.95	-63.9954	-58.136
77	-63.8733	-58.3191
77.05	-64.1174	-58.2886
77.1	-64.2395	-58.3191
77.15	-64.0869	-58.0444
77.2	-64.1785	-58.3496
77.25	-64.0259	-58.3191
77.3	-63.9038	-58.3496
77.35	-64.1479	-58.1665
77.4	-64.1785	-58.3191
77.45	-64.2395	-58.3496
77.5	-64.1785	-58.2886
77.55	-64.0869	-58.136
77.6	-63.8733	-58.197
77.65	-64.0869	-58.2581
77.7	-64.1785	-58.2581
77.75	-64.1785	-58.2275
77.8	-64.0869	-58.0444
77.85	-64.0869	-58.2275
77.9	-64.0564	-58.2581
77.95	-63.9343	-58.2581
78	-64.1174	-58.136
78.05	-64.1785	-58.0444
78.1	-64.209	-58.2581
78.15	-64.1785	-58.3191
78.2	-64.1174	-58.3191
78.25	-64.0259	-58.1665
78.3	-64.0564	-57.9529
78.35	-64.209	-58.2275
78.4	-64.209	-58.3191
78.45	-64.2395	-58.197
78.5	-64.209	-58.136
78.55	-64.1785	-58.0139
78.6	-63.9343	-58.197
78.65	-63.9343	-58.2886
78.7	-64.1785	-58.1055
78.75	-64.1479	-58.0139
78.8	-64.0869	-57.9834
78.85	-63.8428	-57.9834
78.9	-64.0259	-58.197
78.95	-64.1479	-58.1055
79	-64.0564	-58.0749
79.05	-63.9038	-57.9529
79.1	-64.1479	-57.8613
79.15	-64.1479	-58.0139
79.2	-63.8123	-58.2275
79.25	-64.1785	-58.1055
79.3	-64.0564	-58.0444
79.35	-64.0869	-57.9529
79.4	-64.1174	-57.9224
79.45	-63.8733	-58.1055
79.5	-64.2395	-58.136
79.55	-64.1174	-58.0139
79.6	-64.0564	-58.0749
79.65	-64.1174	-57.9529
79.7	-63.8123	-57.7393
79.75	-64.209	-57.9834
79.8	-64.0259	-58.197
79.85	-64.0869	-58.0749
79.9	-64.0259	-58.0749
79.95	-63.8123	-58.0749
80	-64.0869	-57.8613
80.05	-63.9954	-57.9529
80.1	-63.9648	-58.136
80.15	-63.9343	-58.136
80.2	-63.9038	-58.136
80.25	-64.1174	-58.136
80.3	-64.0869	-58.1055
80.35	-63.7512	-57.8918
80.4	-64.2395	-57.8003
80.45	-64.0564	-58.0444
80.5	-63.8733	-58.2581
80.55	-64.1174	-58.1055
80.6	-64.0259	-58.0749
80.65	-63.9038	-58.136
80.7	-64.209	-58.0139
80.75	-64.0869	-57.8918
80.8	-63.8123	-57.8918
80.85	-64.3005	-58.136
80.9	-64.0869	-58.136
80.95	-63.8123	-58.0444
81	-64.209	-57.7698
81.05	-64.0869	-57.9224
81.1	-63.8733	-58.1055
81.15	-64.0869	-58.0139
81.2	-64.0259	-57.7698
81.25	-64.0564	-58.1055
81.3	-63.9954	-58.136
81.35	-64.2395	-57.8003
81.4	-64.0869	-58.1665
81.45	-63.9954	-58.0444
81.5	-64.3005	-57.9834
81.55	-64.1479	-58.1055
81.6	-63.9954	-57.9224
81.65	-64.27	-58.1055
81.7	-64.3005	-58.136
81.75	-64.0564	-57.8613
81.8	-63.9648	-57.9529
81.85	-64.2395	-57.7393
81.9	-64.2395	-58.1055
81.95	-63.9038	-58.0444
82	-64.0869	-57.9529
82.05	-64.209	-57.9834
82.1	-64.1174	-57.8003
82.15	-63.9648	-58.1055
82.2	-64.3005	-57.9529
82.25	-64.1785	-57.8308
82.3	-64.0869	-58.0444
82.35	-64.1479	-57.9834
82.4	-64.331	-57.9834
82.45	-64.2395	-58.0139
82.5	-64.0564	-57.8308
82.55	-64.27	-58.1665
82.6	-64.2395	-58.0749
82.65	-64.209	-57.8003
82.7	-63.9648	-58.1665
82.75	-64.331	-58.0139
82.8	-64.1479	-57.8613
82.85	-64.1479	-58.1665
82.9	-63.9343	-57.9834
82.95	-64.209	-57.7698
83	-64.1174	-58.0139
83.05	-64.0259	-57.9834
83.1	-63.8428	-57.7393
83.15	-64.209	-57.9529
83.2	-64.1479	-57.9529
83.25	-64.0259	-57.9224
83.3	-63.8428	-57.8308
83.35	-64.1785	-57.9834
83.4	-64.1174	-58.0139
83.45	-64.0259	-57.7087
83.5	-63.8428	-58.0139
83.55	-64.1479	-57.9529
83.6	-64.27	-57.8918
83.65	-64.1785	-57.9529
83.7	-63.9648	-57.9529
83.75	-64.0869	-57.8918
83.8	-64.27	-57.7698
83.85	-64.0259	-58.136
83.9	-64.1174	-57.8918
83.95	-63.9648	-57.7087
84	-64.2395	-57.9834
84.05	-64.1785	-57.9529
84.1	-64.1174	-57.8613
84.15	-63.9954	-57.6477
84.2	-63.9648	-57.9834
84.25	-64.1785	-57.8613
84.3	-64.0564	-57.8003
84.35	-63.9954	-57.7698
84.4	-63.8733	-57.9834
84.45	-63.9648	-57.9529
84.5	-64.1785	-57.7087
84.55	-63.9954	-57.8613
84.6	-64.0869	-57.9834
84.65	-63.8733	-57.9224
84.7	-63.9954	-57.6782
84.75	-64.1785	-57.8613
84.8	-64.1174	-57.8613
84.85	-64.0869	-57.8613
84.9	-63.9343	-57.6172
84.95	-63.9343	-57.9224
85	-64.2395	-57.8613
85.05	-64.1479	-57.7698
85.1	-64.0564	-57.6172
85.15	-64.0259	-57.8613
85.2	-63.9648	-57.8613
85.25	-64.1479	-57.8613
85.3	-64.209	-57.5561
85.35	-64.0564	-57.8308
85.4	-64.1174	-57.8613
85.45	-64.0869	-57.7393
85.5	-63.9954	-57.6782
85.55	-64.2395	-57.7393
85.6	-64.209	-57.8613
85.65	-64.1174	-57.7698
85.7	-64.0564	-57.7393
85.75	-64.0259	-57.6477
85.8	-64.0259	-57.8308
85.85	-64.331	-57.7393
85.9	-64.2395	-57.7393
85.95	-64.1174	-57.6172
86	-64.0869	-57.7087
86.05	-63.9954	-57.8308
86.1	-63.9648	-57.8003
86.15	-64.1479	-57.6477
86.2	-64.2395	-57.5561
86.25	-64.1785	-57.7698
86.3	-64.209	-57.8003
86.35	-64.0259	-57.7087
86.4	-63.8428	-57.5867
86.45	-63.9343	-57.5561
86.5	-64.0869	-57.7698
86.55	-64.1785	-57.6477
86.6	-64.0564	-57.6782
86.65	-63.9648	-57.4951
86.7	-64.0259	-57.6172
86.75	-63.9648	-57.8918
86.8	-63.8733	-57.7393
86.85	-63.9954	-57.7393
86.9	-64.3005	-57.6172
86.95	-64.1174	-57.5867
87	-64.1785	-57.8308
87.05	-63.9648	-57.6782
87.1	-63.9343	-57.7087
87.15	-64.2395	-57.6172
87.2	-64.1479	-57.373
87.25	-64.0564	-57.6477
87.3	-63.9954	-57.6782
87.35	-64.2395	-57.5867
87.4	-64.1174	-57.5561
87.45	-63.8428	-57.4951
87.5	-64.2395	-57.312
87.55	-64.0564	-57.4951
87.6	-63.8733	-57.6477
87.65	-64.0564	-57.4951
87.7	-63.9343	-57.4036
87.75	-64.1174	-57.3425
87.8	-64.1174	-57.312
87.85	-63.8733	-57.5256
87.9	-64.1785	-57.5561
87.95	-64.0259	-57.4341
88	-64.1479	-57.5256
88.05	-64.1174	-57.3425
88.1	-63.9038	-57.1594
88.15	-64.209	-57.373
88.2	-63.9648	-57.5867
88.25	-64.1174	-57.4951
88.3	-64.0869	-57.4646
88.35	-64.0564	-57.373
88.4	-64.209	-57.2815
88.45	-63.9038	-57.1899
88.5	-64.209	-57.3425
88.55	-64.1174	-57.4646
88.6	-63.8123	-57.4951
88.65	-64.1785	-57.312
88.7	-64.0259	-57.373
88.75	-63.9038	-57.2205
88.8	-64.1174	-57.1289
88.85	-63.9648	-57.312
88.9	-63.9648	-57.4646
88.95	-64.0259	-57.5561
89	-64.0564	-57.373
89.05	-63.9343	-57.4646
89.1	-64.1174	-57.3425
89.15	-63.9648	-57.2815
89.2	-64.0869	-57.251
89.25	-64.209	-57.5561
89.3	-63.9648	-57.5561
89.35	-63.9038	-57.4646
89.4	-64.1479	-57.2205
89.45	-64.1479	-57.4951
89.5	-63.8123	-57.4951
89.55	-64.209	-57.3425
89.6	-64.1785	-57.3425
89.65	-63.7817	-57.5867
89.7	-64.1479	-57.3425
89.75	-64.0259	-57.4646
89.8	-63.9038	-57.373
89.85	-63.9954	-57.251
89.9	-64.0869	-57.5256
89.95	-63.9343	-57.4646
90	-63.7817	-57.2815
90.05	-64.1174	-57.4341
90.1	-64.0564	-57.2205
90.15	-63.8123	-57.4951
90.2	-63.9954	-57.4341
90.25	-64.1174	-57.2815
90.3	-63.9648	-57.4341
90.35	-63.8123	-57.1594
90.4	-64.1479	-57.5256
90.45	-64.0259	-57.4036
90.5	-63.7817	-57.373
90.55	-64.0259	-57.4036
90.6	-63.9343	-57.0984
90.65	-63.9343	-57.4646
90.7	-63.8428	-57.4341
90.75	-64.0564	-57.1899
90.8	-63.9038	-57.4646
90.85	-63.8428	-57.312
90.9	-63.9038	-57.0984
90.95	-64.0869	-57.4341
91	-63.9038	-57.3425
91.05	-63.6291	-57.1289
91.1	-63.8733	-57.373
91.15	-63.9648	-57.2815
91.2	-63.8733	-57.0374
91.25	-63.6291	-57.3425
91.3	-63.9648	-57.251
91.35	-63.9038	-57.1594
91.4	-63.8428	-57.4341
91.45	-63.6291	-57.3425
91.5	-64.0564	-57.0984
91.55	-63.8123	-57.4341
91.6	-63.7207	-57.373
91.65	-63.5376	-57.251
91.7	-64.0259	-57.2815
91.75	-63.9954	-57.5256
91.8	-63.7817	-57.373
91.85	-63.5681	-57.1289
91.9	-63.9648	-57.5256
91.95	-63.9038	-57.4036
92	-63.8428	-57.2205
92.05	-63.5376	-57.3425
92.1	-63.7817	-57.312
92.15	-63.9038	-57.2815
92.2	-63.8123	-57.1899
92.25	-63.7512	-57.4646
92.3	-63.6902	-57.4646
92.35	-63.9648	-57.0679
92.4	-63.9038	-57.4646
92.45	-63.7817	-57.373
92.5	-63.6902	-57.312
92.55	-63.8428	-57.1289
92.6	-64.0259	-57.4036
92.65	-63.9038	-57.2815
92.7	-63.8428	-57.2205
92.75	-63.6902	-57.1594
92.8	-63.9648	-57.4036
92.85	-63.9038	-57.373
92.9	-63.8428	-57.2205
92.95	-63.8123	-57.312
93	-63.6597	-57.4036
93.05	-63.8733	-57.251
93.1	-63.9038	-57.1289
93.15	-63.9038	-57.251
93.2	-63.6902	-57.312
93.25	-63.6291	-57.2205
93.3	-63.8733	-57.0374
93.35	-63.8733	-57.2205
93.4	-63.8428	-57.312
93.45	-63.7207	-57.312
93.5	-63.5376	-57.0984
93.55	-63.8123	-57.251
93.6	-63.9038	-57.3425
93.65	-63.7817	-57.4036
93.7	-63.8123	-57.1594
93.75	-63.5986	-57.1594
93.8	-63.7512	-57.4036
93.85	-63.9038	-57.373
93.9	-63.8123	-57.2815
93.95	-63.8733	-57.0374
94	-63.7207	-57.373
94.05	-63.6597	-57.3425
94.1	-63.7512	-57.2205
94.15	-63.8733	-57.0068
94.2	-63.8123	-57.2205
94.25	-63.8428	-57.4036
94.3	-63.7207	-57.2205
94.35	-63.446	-57.1594
94.4	-63.6291	-56.9153
94.45	-63.9038	-57.312
94.5	-63.8733	-57.2205
94.55	-63.8428	-57.2815
94.6	-63.6902	-57.0068
94.65	-63.7817	-57.0374
94.7	-63.6291	-57.251
94.75	-63.7512	-57.1289
94.8	-63.9648	-57.1289
94.85	-63.8733	-56.9153
94.9	-63.8733	-57.0984
94.95	-63.7817	-57.2815
95	-63.6597	-57.0068
95.05	-63.6597	-57.1594
95.1	-63.8428	-56.9763
95.15	-63.9038	-57.0068
95.2	-63.7512	-57.1594
95.25	-63.7512	-57.1289
95.3	-63.6597	-57.0984
95.35	-63.4766	-56.9763
95.4	-63.6902	-56.9153
95.45	-63.8123	-57.1594
95.5	-63.7207	-57.1289
95.55	-63.5986	-57.1289
95.6	-63.5681	-57.0984
95.65	-63.7817	-56.8542
95.7	-63.8123	-56.9763
95.75	-63.5071	-57.251
95.8	-63.8123	-57.1289
95.85	-63.6902	-57.1594
95.9	-63.6291	-57.0374
95.95	-63.8733	-56.9458
96	-63.6291	-57.1289
96.05	-63.8428	-57.251
96.1	-63.8428	-57.1594
96.15	-63.5376	-57.1289
96.2	-63.8733	-57.1594
96.25	-63.6597	-56.9458
96.3	-63.7817	-56.8848
96.35	-63.7817	-57.2205
96.4	-63.4766	-57.1594
96.45	-63.7817	-57.0984
96.5	-63.6291	-57.0374
96.55	-63.7207	-57.0068
96.6	-63.7512	-56.7932
96.65	-63.446	-56.9763
96.7	-63.6902	-57.1594
96.75	-63.6291	-57.1899
96.8	-63.8123	-57.1899
96.85	-63.6597	-57.0679
96.9	-63.385	-56.9763
96.95	-63.8733	-56.8542
97	-63.6902	-57.0068
97.05	-63.5681	-57.1594
97.1	-63.8428	-57.1899
97.15	-63.6291	-57.1289
97.2	-63.6597	-57.0679
97.25	-63.7512	-57.1899
97.3	-63.6597	-57.0374
97.35	-63.7207	-56.8848
97.4	-63.8123	-57.0679
97.45	-63.5986	-57.1899
97.5	-63.5681	-57.2205
97.55	-63.7817	-57.1594
97.6	-63.5986	-57.0984
97.65	-63.6597	-56.9763
97.7	-63.7817	-57.3425
97.75	-63.6902	-57.2205
97.8	-63.5376	-57.0984
97.85	-63.7817	-57.1594
97.9	-63.7512	-57.3425
97.95	-63.4155	-57.251
98	-63.9038	-57.0679
98.05	-63.8123	-57.4646
98.1	-63.5376	-57.2815
98.15	-63.7512	-57.1899
98.2	-63.8428	-57.2815
98.25	-63.7207	-57.0679
98.3	-63.5681	-57.4036
98.35	-63.9038	-57.2815
98.4	-63.7512	-57.2205
98.45	-63.4766	-57.312
98.5	-63.7817	-57.0679
98.55	-63.6291	-57.373
98.6	-63.6291	-57.251
98.65	-63.6597	-57.2815
98.7	-63.7817	-57.3425
98.75	-63.6597	-57.0679
98.8	-63.4766	-57.4341
98.85	-63.7207	-57.2815
98.9	-63.6597	-57.1594
98.95	-63.6291	-57.3425
99	-63.5376	-57.1899
99.05	-63.7817	-57.2815
99.1	-63.7207	-57.4036
99.15	-63.4766	-57.0374
99.2	-63.6597	-57.4646
99.25	-63.8428	-57.3425
99.3	-63.7207	-57.0679
99.35	-63.5071	-57.5256
99.4	-63.7817	-57.4036
99.45	-63.7207	-57.0984
99.5	-63.6597	-57.4951
99.55	-63.385	-57.4036
99.6	-63.6597	-57.0374
99.65	-63.6902	-57.4646
99.7	-63.5681	-57.373
99.75	-63.5071	-57.1289
99.8	-63.6597	-57.4951
99.85	-63.5986	-57.251
[truncated: 204,453+ more rows]

## Sheet: Figure 2f
	Neurites							Reverse of g as in h
	sinusoids
	c-ms	ms-c
0	-49.3164	-45.105
0.05	-49.469	-45.4712
0.1	-49.7131	-45.4102
0.15	-49.5605	-45.3186
0.2	-49.3164	-45.0745
0.25	-49.4385	-45.2881
0.3	-49.7131	-45.5322
0.35	-49.53	-45.3796
0.4	-49.3469	-45.227
0.45	-49.3164	-45.105
0.5	-49.5911	-45.5017
0.55	-49.5911	-45.5627
0.6	-49.4995	-45.4712
0.65	-49.1943	-45.2881
0.7	-49.4385	-45.166
0.75	-49.5605	-45.5017
0.8	-49.5911	-45.4712
0.85	-49.3164	-45.5017
0.9	-49.1638	-45.2881
0.95	-49.5605	-45.166
1	-49.6521	-45.3491
1.05	-49.469	-45.6543
1.1	-49.3469	-45.5017
1.15	-49.2554	-45.2881
1.2	-49.53	-45.1355
1.25	-49.4385	-45.4407
1.3	-49.3469	-45.6848
1.35	-49.1638	-45.5017
1.4	-49.1028	-45.3796
1.45	-49.408	-45.2881
1.5	-49.53	-45.4407
1.55	-49.469	-45.6238
1.6	-49.1333	-45.6238
1.65	-49.0723	-45.6238
1.7	-49.4385	-45.5017
1.75	-49.4995	-45.227
1.8	-49.4995	-45.4407
1.85	-49.2859	-45.6238
1.9	-49.1333	-45.7458
1.95	-49.3164	-45.5322
2	-49.469	-45.4407
2.05	-49.4385	-45.3491
2.1	-49.3774	-45.4102
2.15	-49.2859	-45.6238
2.2	-49.1028	-45.6543
2.25	-49.3774	-45.6543
2.3	-49.53	-45.5322
2.35	-49.53	-45.4407
2.4	-49.3774	-45.227
2.45	-49.2554	-45.5017
2.5	-49.1333	-45.7458
2.55	-49.3774	-45.7153
2.6	-49.4995	-45.6543
2.65	-49.53	-45.5627
2.7	-49.3774	-45.4407
2.75	-49.3164	-45.4407
2.8	-49.0112	-45.5627
2.85	-49.2554	-45.7153
2.9	-49.4385	-45.8069
2.95	-49.53	-45.7764
3	-49.408	-45.6848
3.05	-49.3469	-45.5933
3.1	-49.2554	-45.4712
3.15	-49.0723	-45.4712
3.2	-49.2554	-45.5627
3.25	-49.408	-45.6848
3.3	-49.408	-45.8374
3.35	-49.3774	-45.8069
3.4	-49.2859	-45.7153
3.45	-49.1028	-45.5933
3.5	-48.9502	-45.6238
3.55	-48.9807	-45.5322
3.6	-49.1638	-45.4407
3.65	-49.2859	-45.5627
3.7	-49.2249	-45.8984
3.75	-49.1943	-45.8984
3.8	-49.1333	-45.8069
3.85	-48.9807	-45.8069
3.9	-48.7976	-45.7764
3.95	-48.8281	-45.6848
4	-48.9197	-45.5322
4.05	-49.0417	-45.4102
4.1	-49.1638	-45.4712
4.15	-49.1638	-45.5933
4.2	-49.1028	-45.6543
4.25	-48.9807	-45.8069
4.3	-48.9502	-45.8374
4.35	-48.8586	-45.7153
4.4	-48.7671	-45.7764
4.45	-48.7976	-45.6543
4.5	-48.8892	-45.6238
4.55	-49.1028	-45.4712
4.6	-49.1028	-45.5627
4.65	-49.0417	-45.7153
4.7	-49.0112	-45.7458
4.75	-49.0112	-45.7458
4.8	-49.0112	-45.6238
4.85	-48.8892	-45.5017
4.9	-48.8281	-45.6848
4.95	-48.7061	-45.6848
5	-48.6145	-45.4407
5.05	-48.7061	-45.4712
5.1	-48.8281	-45.6848
5.15	-48.9502	-45.5933
5.2	-49.0417	-45.2576
5.25	-49.1638	-45.7153
5.3	-49.0417	-45.6238
5.35	-48.9502	-45.4407
5.4	-48.9197	-45.7458
5.45	-48.9197	-45.5627
5.5	-48.8281	-45.3491
5.55	-48.7976	-45.7458
5.6	-48.7976	-45.5017
5.65	-48.7976	-45.4712
5.7	-48.6755	-45.6238
5.75	-48.5535	-45.4712
5.8	-48.645	-45.6543
5.85	-48.6145	-45.6848
5.9	-48.7671	-45.2881
5.95	-48.7976	-45.7458
6	-49.0112	-45.7764
6.05	-49.0417	-45.227
6.1	-49.0112	-45.7764
6.15	-48.8892	-45.7458
6.2	-48.9502	-45.4102
6.25	-48.7976	-45.7764
6.3	-48.6755	-45.7764
6.35	-48.7671	-45.5322
6.4	-49.1638	-45.7153
6.45	-49.0112	-45.7764
6.5	-48.8281	-45.5627
6.55	-48.6145	-45.4712
6.6	-48.9807	-45.8069
6.65	-49.1028	-45.7764
6.7	-48.8586	-45.2576
6.75	-48.645	-45.6238
6.8	-49.0417	-45.7153
6.85	-49.0417	-45.6238
6.9	-48.6755	-45.3796
6.95	-48.9197	-45.6848
7	-49.1028	-45.7153
7.05	-48.7671	-45.4712
7.1	-48.8281	-45.4102
7.15	-48.9807	-45.7153
7.2	-48.7976	-45.6848
7.25	-48.8281	-45.3186
7.3	-49.0112	-45.4407
7.35	-48.7671	-45.6848
7.4	-48.8281	-45.7153
7.45	-49.0723	-45.4102
7.5	-48.8892	-45.5017
7.55	-48.7061	-45.7153
7.6	-49.0417	-45.7458
7.65	-48.9197	-45.4407
7.7	-48.6145	-45.4407
7.75	-49.0417	-45.6848
7.8	-48.9502	-45.6848
7.85	-48.6755	-45.4712
7.9	-48.9807	-45.3186
7.95	-49.0112	-45.7458
8	-48.7976	-45.6543
8.05	-48.6755	-45.5933
8.1	-49.0723	-45.2881
8.15	-49.0112	-45.6543
8.2	-48.8281	-45.7458
8.25	-48.8586	-45.6543
8.3	-49.1638	-45.2881
8.35	-49.0723	-45.4102
8.4	-48.7671	-45.7458
8.45	-48.8281	-45.6238
8.5	-49.1943	-45.4407
8.55	-49.1028	-45.1965
8.6	-48.8892	-45.5017
8.65	-48.7366	-45.5627
8.7	-49.1333	-45.5627
8.75	-49.0723	-45.1965
8.8	-48.9197	-45.2576
8.85	-48.7061	-45.5627
8.9	-48.9807	-45.5627
8.95	-49.0723	-45.4712
9	-48.9807	-45.1355
9.05	-48.7976	-45.227
9.1	-48.7366	-45.5322
9.15	-49.0417	-45.5017
9.2	-48.9807	-45.3796
9.25	-48.9197	-45.3186
9.3	-48.6145	-45.105
9.35	-48.8892	-45.4407
9.4	-49.0417	-45.4712
9.45	-49.0112	-45.5322
9.5	-48.7671	-45.3491
9.55	-48.6145	-45.105
9.6	-48.7976	-45.3186
9.65	-48.8892	-45.6238
9.7	-48.8586	-45.5627
9.75	-48.8281	-45.3796
9.8	-48.5229	-45.227
9.85	-48.7366	-45.1965
9.9	-49.0417	-45.4712
9.95	-48.9502	-45.5017
10	-48.7366	-45.4712
10.05	-48.4619	-45.4407
10.1	-48.7671	-45.3186
10.15	-48.9807	-45.105
10.2	-48.8892	-45.4102
10.25	-48.7061	-45.5627
10.3	-48.7061	-45.4712
10.35	-48.6145	-45.3491
10.4	-48.8586	-45.2576
10.45	-48.9502	-45.0439
10.5	-48.8586	-45.227
10.55	-48.7671	-45.5017
10.6	-48.5229	-45.4407
10.65	-48.6145	-45.4102
10.7	-48.8892	-45.227
10.75	-48.9807	-45.1965
10.8	-48.8281	-45.0439
10.85	-48.7366	-45.227
10.9	-48.5535	-45.4407
10.95	-48.6145	-45.4712
11	-48.7366	-45.3796
11.05	-48.8281	-45.3796
11.1	-48.8281	-45.2576
11.15	-48.7671	-45.105
11.2	-48.6145	-45.1355
11.25	-48.4924	-45.2881
11.3	-48.645	-45.5933
11.35	-48.8586	-45.5322
11.4	-48.9197	-45.4712
11.45	-48.8586	-45.4102
11.5	-48.7671	-45.3796
11.55	-48.645	-45.227
11.6	-48.645	-45.1965
11.65	-48.6755	-45.3186
11.7	-48.8586	-45.6543
11.75	-49.0112	-45.7458
11.8	-48.9197	-45.5627
11.85	-48.8892	-45.5933
11.9	-48.6755	-45.7153
11.95	-48.6755	-45.5627
12	-48.645	-45.4102
12.05	-48.8586	-45.2881
12.1	-48.9807	-45.3796
12.15	-49.1028	-45.5627
12.2	-49.0112	-45.6238
12.25	-48.9807	-45.7458
12.3	-48.9197	-45.7153
12.35	-48.9502	-45.6238
12.4	-48.7366	-45.6238
12.45	-48.7671	-45.6238
12.5	-49.1028	-45.5017
12.55	-49.2249	-45.4712
12.6	-49.2554	-45.3491
12.65	-49.1333	-45.227
12.7	-49.1638	-45.4407
12.75	-49.1333	-45.6238
12.8	-49.0723	-45.8069
12.85	-48.8892	-45.6848
12.9	-48.8281	-45.6543
12.95	-49.0112	-45.4407
13	-49.1333	-45.4102
13.05	-49.1943	-45.5322
13.1	-49.2859	-45.6848
13.15	-49.3164	-45.6238
13.2	-49.1638	-45.5017
13.25	-49.1638	-45.3491
13.3	-49.1028	-45.6543
13.35	-49.0723	-45.7153
13.4	-48.9502	-45.3186
13.45	-48.7976	-45.5933
13.5	-48.7976	-45.6238
13.55	-48.9502	-45.5322
13.6	-49.0417	-45.5933
13.65	-49.1638	-45.6543
13.7	-49.1333	-45.5322
13.75	-49.1638	-45.7153
13.8	-49.2249	-45.8374
13.85	-49.2249	-45.3491
13.9	-49.1638	-45.6848
13.95	-49.1333	-45.7153
14	-49.2554	-45.3491
14.05	-49.1028	-45.7764
14.1	-49.0723	-45.6543
14.15	-49.0417	-45.3796
14.2	-49.0723	-45.8374
14.25	-49.0112	-45.5017
14.3	-48.9807	-45.5017
14.35	-48.9502	-45.8374
14.4	-49.1333	-45.5933
14.45	-49.3164	-45.5322
14.5	-49.3164	-45.7764
14.55	-49.3469	-45.5627
14.6	-49.2859	-45.4407
14.65	-49.1638	-45.7153
14.7	-48.9197	-45.5627
14.75	-49.0723	-45.3491
14.8	-49.469	-45.8374
14.85	-49.3774	-45.6543
14.9	-49.1638	-45.2576
14.95	-49.0112	-45.6848
15	-49.469	-45.6543
15.05	-49.469	-45.4102
15.1	-49.2249	-45.3186
15.15	-49.1638	-45.6543
15.2	-49.4995	-45.5322
15.25	-49.4385	-45.3186
15.3	-49.0112	-45.4712
15.35	-49.4995	-45.6543
15.4	-49.469	-45.5627
15.45	-49.1028	-45.166
15.5	-49.4995	-45.5017
15.55	-49.469	-45.5017
15.6	-49.1028	-45.5322
15.65	-49.469	-45.105
15.7	-49.53	-45.5933
15.75	-49.1638	-45.5627
15.8	-49.4385	-45.6238
15.85	-49.5605	-45.2881
15.9	-49.3164	-45.7153
15.95	-49.3774	-45.5627
16	-49.469	-45.6238
16.05	-49.4385	-45.1965
16.1	-49.1638	-45.6543
16.15	-49.5911	-45.7153
16.2	-49.4385	-45.6238
16.25	-49.2249	-45.3491
16.3	-49.408	-45.5627
16.35	-49.6826	-45.7153
16.4	-49.408	-45.6848
16.45	-49.2249	-45.4102
16.5	-49.6216	-45.4407
16.55	-49.6521	-45.6848
16.6	-49.4995	-45.6238
16.65	-49.3469	-45.3796
16.7	-49.5605	-45.2576
16.75	-49.6216	-45.5933
16.8	-49.5605	-45.6848
16.85	-49.3469	-45.4712
16.9	-49.6216	-45.227
16.95	-49.7742	-45.3796
17	-49.7131	-45.6238
17.05	-49.53	-45.5627
17.1	-49.4995	-45.5017
17.15	-49.7742	-45.105
17.2	-49.7131	-45.3796
17.25	-49.5911	-45.6238
17.3	-49.3469	-45.5933
17.35	-49.6216	-45.3186
17.4	-49.7742	-45.1355
17.45	-49.6826	-45.5017
17.5	-49.3774	-45.5627
17.55	-49.3164	-45.4712
17.6	-49.5911	-45.2576
17.65	-49.6826	-45.1965
17.7	-49.6216	-45.3186
17.75	-49.3164	-45.6238
17.8	-49.3469	-45.4102
17.85	-49.6521	-45.5322
17.9	-49.5911	-45.227
17.95	-49.5605	-45.3186
18	-49.2859	-45.5627
18.05	-49.2249	-45.5933
18.1	-49.5605	-45.5933
18.15	-49.5605	-45.3491
18.2	-49.4995	-45.2881
18.25	-49.2554	-45.4712
18.3	-49.2249	-45.6848
18.35	-49.469	-45.6543
18.4	-49.5605	-45.6543
18.45	-49.53	-45.4712
18.5	-49.4385	-45.3186
18.55	-49.1943	-45.4712
18.6	-49.2859	-45.6543
18.65	-49.53	-45.5933
18.7	-49.5911	-45.5933
18.75	-49.4995	-45.5017
18.8	-49.3164	-45.166
18.85	-49.0417	-45.4102
18.9	-49.3774	-45.6238
18.95	-49.6216	-45.6543
19	-49.53	-45.5322
19.05	-49.469	-45.5322
19.1	-49.3164	-45.3796
19.15	-49.1943	-45.166
19.2	-49.2249	-45.2881
19.25	-49.469	-45.5017
19.3	-49.5911	-45.5627
19.35	-49.4995	-45.5017
19.4	-49.3774	-45.3796
19.45	-49.1638	-45.2576
19.5	-49.1638	-45.1355
19.55	-49.3164	-45.1965
19.6	-49.469	-45.4102
19.65	-49.469	-45.4102
19.7	-49.4995	-45.5627
19.75	-49.2859	-45.5017
19.8	-49.1638	-45.4102
19.85	-49.0417	-45.1965
19.9	-49.1943	-45.166
19.95	-49.4385	-45.227
20	-49.4995	-45.3491
20.05	-49.3164	-45.3796
20.1	-49.3164	-45.4712
20.15	-49.2249	-45.5017
20.2	-49.1638	-45.3796
20.25	-49.0723	-45.3796
20.3	-49.2249	-45.2881
20.35	-49.469	-45.1965
20.4	-49.408	-45.0439
20.45	-49.3774	-45.3186
20.5	-49.3774	-45.5322
20.55	-49.3164	-45.5933
20.6	-49.2859	-45.5322
20.65	-49.1333	-45.5627
20.7	-49.1333	-45.5322
20.75	-49.4385	-45.5017
20.8	-49.53	-45.3491
20.85	-49.469	-45.3186
20.9	-49.469	-45.2576
20.95	-49.53	-45.227
21	-49.4995	-45.3186
21.05	-49.3774	-45.4102
21.1	-49.2859	-45.6238
21.15	-49.1638	-45.6238
21.2	-49.1943	-45.5017
21.25	-49.2249	-45.4407
21.3	-49.408	-45.3491
21.35	-49.5911	-45.1965
21.4	-49.53	-45.5017
21.45	-49.4995	-45.6238
21.5	-49.4385	-45.4712
21.55	-49.4995	-45.1965
21.6	-49.469	-45.3491
21.65	-49.2554	-45.5322
21.7	-49.1638	-45.4102
21.75	-49.2249	-45.166
21.8	-49.0723	-45.5933
21.85	-49.1333	-45.4407
21.9	-49.1943	-45.166
21.95	-49.3469	-45.5933
22	-49.4385	-45.5017
22.05	-49.469	-45.1355
22.1	-49.408	-45.5627
22.15	-49.4995	-45.6543
22.2	-49.4385	-45.166
22.25	-49.4385	-45.5933
22.3	-49.3164	-45.4712
22.35	-49.3469	-45.227
22.4	-49.3164	-45.6543
22.45	-49.2554	-45.3186
22.5	-49.2249	-45.4102
22.55	-49.1333	-45.5627
22.6	-49.1943	-45.3796
22.65	-49.0417	-45.4407
22.7	-49.0112	-45.6238
22.75	-49.0723	-45.2576
22.8	-49.2859	-45.5933
22.85	-49.3469	-45.5322
22.9	-49.3774	-45.2881
22.95	-49.3774	-45.4712
23	-49.3164	-45.5627
23.05	-49.2554	-45.3796
23.1	-49.0112	-45.2576
23.15	-49.408	-45.5627
23.2	-49.408	-45.4102
23.25	-49.3469	-45.166
23.3	-48.8892	-45.5017
23.35	-49.3164	-45.4102
23.4	-49.3774	-45.1965
23.45	-49.2554	-45.227
23.5	-48.9502	-45.4407
23.55	-49.2859	-45.3491
23.6	-49.3469	-45.105
23.65	-49.0112	-45.4102
23.7	-49.1943	-45.4712
23.75	-49.2859	-45.3186
23.8	-49.0723	-45.166
23.85	-49.1333	-45.5322
23.9	-49.3164	-45.5017
23.95	-49.1028	-45.3491
24	-49.0112	-45.2576
24.05	-49.3469	-45.5933
24.1	-49.2249	-45.5017
24.15	-48.8892	-45.3796
24.2	-49.3164	-45.3186
24.25	-49.2554	-45.5933
24.3	-48.8892	-45.6238
24.35	-49.2554	-45.4712
24.4	-49.1943	-45.3186
24.45	-49.0723	-45.6543
24.5	-49.1028	-45.6238
24.55	-49.3164	-45.5627
24.6	-49.1638	-45.2576
24.65	-48.9502	-45.5627
24.7	-49.2249	-45.7153
24.75	-49.3774	-45.6543
24.8	-49.1943	-45.3491
24.85	-48.9502	-45.4712
24.9	-49.2859	-45.7458
24.95	-49.3774	-45.8069
25	-49.1943	-45.6238
25.05	-49.0723	-45.3796
25.1	-49.2554	-45.7153
25.15	-49.3774	-45.7764
25.2	-49.2859	-45.7764
25.25	-49.0417	-45.4407
25.3	-49.0417	-45.5627
25.35	-49.2249	-45.8679
25.4	-49.2554	-45.8374
25.45	-49.1638	-45.6543
25.5	-48.8892	-45.4407
25.55	-49.1333	-45.5933
25.6	-49.2859	-45.8679
25.65	-49.2249	-45.8069
25.7	-49.0723	-45.7458
25.75	-48.9197	-45.4712
25.8	-49.1638	-45.6848
25.85	-49.2859	-45.99
25.9	-49.1943	-45.8679
25.95	-48.9807	-45.7458
26	-48.8586	-45.5017
26.05	-49.1943	-45.8679
26.1	-49.2249	-46.051
26.15	-49.1638	-46.051
26.2	-48.8892	-45.929
26.25	-48.7366	-45.8374
26.3	-49.1638	-45.6238
26.35	-49.1943	-45.9595
26.4	-49.1333	-46.051
26.45	-48.9197	-46.051
26.5	-48.8586	-45.929
26.55	-48.9807	-45.7153
26.6	-49.2554	-45.8069
26.65	-49.0723	-46.1121
26.7	-49.2554	-46.1731
26.75	-48.9807	-46.0205
26.8	-48.9502	-45.99
26.85	-49.1333	-45.7764
26.9	-49.3469	-45.7764
26.95	-49.2554	-45.99
27	-49.1028	-46.0815
27.05	-48.9807	-46.051
27.1	-49.0112	-45.99
27.15	-49.3469	-45.7764
27.2	-49.3469	-45.5933
27.25	-49.2554	-45.8069
27.3	-49.2554	-45.99
27.35	-49.1638	-45.9595
27.4	-49.0112	-45.929
27.45	-49.2859	-45.8679
27.5	-49.4385	-45.7458
27.55	-49.3774	-45.5933
27.6	-49.3164	-45.8069
27.65	-49.2554	-45.9595
27.7	-49.0723	-45.9595
27.75	-49.0723	-45.929
27.8	-49.2249	-45.8984
27.85	-49.408	-45.6848
27.9	-49.3469	-45.6238
27.95	-49.2249	-45.6848
28	-49.2554	-45.8679
28.05	-49.0112	-45.99
28.1	-48.9807	-46.0205
28.15	-49.1638	-45.99
28.2	-49.3774	-45.8984
28.25	-49.3469	-45.7458
28.3	-49.2554	-45.8374
28.35	-49.3164	-45.7153
28.4	-49.1943	-45.7458
28.45	-49.0723	-45.9595
28.5	-48.9807	-46.0815
28.55	-49.1943	-46.1121
28.6	-49.469	-45.9595
28.65	-49.408	-45.929
28.7	-49.4385	-45.8984
28.75	-49.4385	-45.8679
28.8	-49.3774	-45.6848
28.85	-49.2249	-45.6848
28.9	-49.0723	-45.8069
28.95	-49.1638	-46.0205
29	-49.2554	-46.1121
29.05	-49.4385	-46.1426
29.1	-49.53	-46.0815
29.15	-49.5605	-46.0815
29.2	-49.5605	-46.0205
29.25	-49.469	-45.9595
29.3	-49.53	-45.99
29.35	-49.408	-45.7153
29.4	-49.4385	-45.6848
29.45	-49.1943	-45.8069
29.5	-49.2554	-46.0205
29.55	-49.3164	-46.051
29.6	-49.5911	-45.99
29.65	-49.6521	-45.8984
29.7	-49.6521	-45.7153
29.75	-49.7742	-45.8069
29.8	-49.6521	-46.0815
29.85	-49.5911	-45.99
29.9	-49.6216	-45.8679
29.95	-49.6216	-45.7764
30	-49.4995	-46.1426
30.05	-49.4995	-46.051
30.1	-49.3774	-45.6848
30.15	-49.4385	-46.0815
30.2	-49.408	-46.051
30.25	-49.4995	-45.7153
30.3	-49.5605	-45.929
30.35	-49.5911	-46.0205
30.4	-49.7131	-45.6848
30.45	-49.8047	-46.0205
30.5	-49.8352	-46.0205
30.55	-49.7436	-45.6543
30.6	-49.8047	-46.1426
30.65	-49.7742	-45.99
30.7	-49.7436	-45.7458
30.75	-49.7131	-46.2341
30.8	-49.8352	-45.9595
30.85	-49.7742	-45.9595
30.9	-49.8047	-46.1121
30.95	-49.6521	-45.8984
31	-49.7436	-46.051
31.05	-49.4995	-46.1426
31.1	-49.6216	-45.8679
31.15	-49.6216	-46.1121
31.2	-49.9268	-46.2036
31.25	-49.9878	-45.8984
31.3	-49.9878	-46.051
31.35	-49.8962	-46.2036
31.4	-49.8657	-45.929
31.45	-49.6826	-45.929
31.5	-49.8657	-46.1426
31.55	-49.9573	-46.051
31.6	-49.9268	-45.7458
31.65	-49.6216	-46.2036
31.7	-49.7742	-46.1121
31.75	-50.0488	-45.7764
31.8	-49.9573	-45.99
31.85	-49.5911	-46.2036
31.9	-49.8962	-45.99
31.95	-49.9573	-45.7153
32	-49.6521	-46.2036
32.05	-49.8047	-46.1731
32.1	-49.8962	-45.929
32.15	-49.7436	-45.8069
32.2	-49.6521	-46.2341
32.25	-49.9268	-46.2036
32.3	-49.8047	-45.8374
32.35	-49.53	-45.8984
32.4	-49.9573	-46.2341
32.45	-49.8962	-46.1121
32.5	-49.4995	-45.8984
32.55	-49.8657	-46.0205
32.6	-49.8962	-46.3562
32.65	-49.6826	-46.2341
32.7	-49.8352	-45.929
32.75	-50.0488	-45.9595
32.8	-49.8047	-46.3867
32.85	-49.6216	-46.2341
32.9	-50.0488	-45.9595
32.95	-49.9878	-45.99
33	-49.7436	-46.2952
33.05	-49.7131	-46.2341
33.1	-50.0183	-45.929
33.15	-50.0183	-45.8374
33.2	-49.6826	-46.2341
33.25	-49.7436	-46.2341
33.3	-50.0488	-46.0205
33.35	-49.9573	-45.6848
33.4	-49.8352	-46.1121
33.45	-49.7131	-46.1426
33.5	-50.0183	-46.0815
33.55	-50.0793	-45.8679
33.6	-49.9878	-45.8374
33.65	-49.6826	-46.1426
33.7	-49.8352	-46.051
33.75	-50.1099	-45.929
33.8	-50.0183	-45.5933
33.85	-49.9878	-45.8984
33.9	-49.8047	-46.0815
33.95	-49.8962	-46.0205
34	-50.2014	-45.7458
34.05	-50.1709	-45.6543
34.1	-49.9573	-45.929
34.15	-49.6826	-46.0815
34.2	-50.0183	-45.8374
34.25	-50.1709	-45.8069
34.3	-50.1099	-45.5933
34.35	-49.9573	-45.7458
34.4	-49.7436	-45.8984
34.45	-50.0183	-45.8984
34.5	-50.0793	-45.8069
34.55	-50.1404	-45.5322
34.6	-49.9268	-45.7153
34.65	-49.7436	-45.99
34.7	-49.8352	-45.8679
34.75	-50.1709	-45.8069
34.8	-50.0488	-45.5933
34.85	-49.9878	-45.5627
34.9	-49.8962	-45.8374
34.95	-49.7436	-45.9595
35	-49.9878	-45.929
35.05	-50.1099	-45.7458
35.1	-50.1099	-45.5627
35.15	-49.9573	-45.5017
35.2	-49.7742	-45.8679
35.25	-49.6826	-45.929
35.3	-50.0183	-45.8984
35.35	-50.1404	-45.7458
35.4	-49.9268	-45.5933
35.45	-49.9268	-45.6238
35.5	-49.8352	-45.8069
35.55	-49.7436	-45.929
35.6	-49.9573	-45.8984
35.65	-50.1099	-45.8374
35.7	-50.0488	-45.7458
35.75	-50.0793	-45.5322
35.8	-49.8352	-45.6238
35.85	-49.6521	-45.929
35.9	-49.7742	-45.99
35.95	-49.9878	-45.8984
36	-49.9878	-45.8984
36.05	-49.9573	-45.7153
36.1	-49.9573	-45.5627
36.15	-49.8657	-45.6543
36.2	-49.5911	-45.8374
36.25	-49.6216	-45.8984
36.3	-49.8962	-45.9595
36.35	-49.9573	-45.929
36.4	-49.8657	-45.8069
36.45	-49.8657	-45.6543
36.5	-49.7742	-45.6848
36.55	-49.6216	-45.7458
36.6	-49.53	-45.8374
36.65	-49.5605	-45.99
36.7	-49.8047	-45.99
36.75	-49.8657	-45.8984
36.8	-49.8352	-45.8679
36.85	-49.8352	-45.7458
36.9	-49.7131	-45.6543
36.95	-49.6216	-45.6238
37	-49.469	-45.6238
37.05	-49.3469	-45.8984
37.1	-49.5605	-45.9595
37.15	-49.7131	-46.0205
37.2	-49.8352	-45.8679
37.25	-49.7436	-45.8984
37.3	-49.7436	-45.7764
37.35	-49.7742	-45.8069
37.4	-49.7131	-45.5627
37.45	-49.6521	-45.5933
37.5	-49.408	-45.6238
37.55	-49.469	-45.8374
37.6	-49.5605	-45.8374
37.65	-49.6216	-45.99
37.7	-49.8352	-45.99
37.75	-49.8657	-45.8679
37.8	-49.8962	-45.8679
37.85	-49.7742	-45.7153
37.9	-49.8657	-45.5017
37.95	-49.7436	-45.5933
38	-49.7131	-45.929
38.05	-49.53	-45.8374
38.1	-49.4995	-45.7153
38.15	-49.4385	-45.5017
38.2	-49.469	-45.5627
38.25	-49.4385	-45.7764
38.3	-49.5605	-45.6848
38.35	-49.6826	-45.4102
38.4	-49.7742	-45.7153
38.45	-49.7131	-45.6848
38.5	-49.8047	-45.4712
38.55	-49.8047	-45.5627
38.6	-49.6216	-45.6848
38.65	-49.6216	-45.4102
38.7	-49.6826	-45.4712
38.75	-49.6216	-45.6543
38.8	-49.5605	-45.3796
38.85	-49.5911	-45.5933
38.9	-49.4385	-45.5627
38.95	-49.53	-45.2881
39	-49.4995	-45.5933
39.05	-49.5605	-45.5627
39.1	-49.4385	-45.2576
39.15	-49.3774	-45.6848
39.2	-49.469	-45.5322
39.25	-49.408	-45.3491
39.3	-49.4995	-45.6848
39.35	-49.53	-45.4407
39.4	-49.8047	-45.5322
39.45	-49.9268	-45.5933
39.5	-49.8352	-45.4407
39.55	-49.7436	-45.4407
39.6	-49.7436	-45.6543
39.65	-49.6826	-45.3796
39.7	-49.5605	-45.3491
39.75	-49.8047	-45.5933
39.8	-49.9878	-45.4712
39.85	-49.8657	-45.1965
39.9	-49.5605	-45.5627
39.95	-49.7436	-45.5627
40	-49.9878	-45.166
40.05	-49.9268	-45.4102
40.1	-49.53	-45.4712
40.15	-49.9878	-45.2881
40.2	-49.9268	-45.1355
40.25	-49.7131	-45.4712
40.3	-49.7436	-45.3491
40.35	-50.0183	-45.0439
40.4	-49.7131	-45.227
40.45	-49.7131	-45.5017
40.5	-49.9878	-45.3491
40.55	-49.7131	-45.0745
40.6	-49.6521	-45.3491
40.65	-49.9268	-45.4407
40.7	-49.7742	-45.3491
40.75	-49.6216	-44.9829
40.8	-50.0183	-45.3491
40.85	-49.8352	-45.5322
40.9	-49.5911	-45.3186
40.95	-49.9878	-45.0134
41	-49.8657	-45.3796
41.05	-49.53	-45.4407
41.1	-49.9573	-45.3796
41.15	-49.8352	-45.105
41.2	-49.6216	-45.3491
41.25	-49.6826	-45.5017
41.3	-49.9573	-45.4102
41.35	-49.8352	-45.105
41.4	-49.4995	-45.1965
41.45	-49.8962	-45.4712
41.5	-49.9878	-45.4102
41.55	-49.8352	-45.1965
41.6	-49.4995	-45.1355
41.65	-49.8962	-45.4407
41.7	-50.0793	-45.3491
41.75	-49.8657	-45.2576
41.8	-49.5911	-44.9829
41.85	-49.9268	-45.2576
41.9	-50.0793	-45.4102
41.95	-49.9573	-45.3186
42	-49.6826	-45.1355
42.05	-49.7742	-44.9829
42.1	-50.0793	-45.2576
42.15	-49.9878	-45.3186
42.2	-49.9268	-45.1965
42.25	-49.6216	-44.9829
42.3	-50.0488	-44.9524
42.35	-50.0488	-45.166
42.4	-50.0183	-45.1355
42.45	-49.6826	-45.1965
42.5	-49.8352	-44.8303
42.55	-50.0793	-44.8608
42.6	-50.0793	-45.105
42.65	-49.9878	-45.166
42.7	-49.5911	-45.0745
42.75	-49.8657	-44.8303
42.8	-50.0488	-44.7388
42.85	-49.9878	-45.105
42.9	-49.8657	-45.166
42.95	-49.6521	-45.0439
43	-49.8047	-44.8303
43.05	-50.0488	-44.7082
43.1	-50.0488	-44.9524
43.15	-49.8962	-45.105
43.2	-49.7436	-45.0439
43.25	-49.7436	-45.0134
43.3	-50.1404	-44.8303
43.35	-50.0793	-44.6777
43.4	-49.9878	-44.8914
43.45	-49.7436	-45.0439
43.5	-49.8047	-44.9829
43.55	-50.1099	-44.8303
43.6	-50.2014	-44.7082
43.65	-50.0793	-44.5557
43.7	-50.0793	-44.8303
43.75	-49.9268	-44.9219
43.8	-49.9268	-44.8608
43.85	-50.1709	-44.8608
43.9	-50.3845	-44.6472
43.95	-50.2624	-44.4641
44	-50.0793	-44.6472
44.05	-49.9573	-44.8914
44.1	-50.0183	-44.8914
44.15	-50.3845	-44.9219
44.2	-50.293	-44.7082
44.25	-50.2624	-44.5862
44.3	-50.2014	-44.4336
44.35	-50.0488	-44.6472
44.4	-49.9268	-44.7388
44.45	-50.2624	-44.8608
44.5	-50.4456	-44.7693
44.55	-50.3235	-44.7082
44.6	-50.3235	-44.5862
44.65	-50.1404	-44.4031
44.7	-50.1099	-44.4641
44.75	-50.0183	-44.6472
44.8	-50.293	-44.7388
44.85	-50.3845	-44.7693
44.9	-50.3845	-44.8914
44.95	-50.3235	-44.7998
45	-50.293	-44.5862
45.05	-50.1709	-44.5251
45.1	-50.0183	-44.4946
45.15	-50.2624	-44.6167
45.2	-50.4761	-44.7388
45.25	-50.4761	-44.8303
45.3	-50.4456	-44.8608
45.35	-50.5066	-44.7998
45.4	-50.4456	-44.7082
45.45	-50.3235	-44.6472
45.5	-50.0488	-44.5251
45.55	-50.293	-44.4031
45.6	-50.4456	-44.281
45.65	-50.5981	-44.4946
45.7	-50.5371	-44.6777
45.75	-50.6592	-44.7388
45.8	-50.6287	-44.6472
45.85	-50.4761	-44.6472
45.9	-50.3235	-44.6167
45.95	-50.3845	-44.6777
46	-50.293	-44.4336
46.05	-50.415	-44.342
46.1	-50.5676	-44.281
46.15	-50.7202	-44.2505
46.2	-50.8118	-44.5251
46.25	-50.6897	-44.5251
46.3	-50.5981	-44.4641
46.35	-50.6592	-44.3726
46.4	-50.5676	-44.1894
46.45	-50.4761	-44.22
46.5	-50.293	-44.5251
46.55	-50.3235	-44.4641
46.6	-50.4456	-44.1589
46.65	-50.4761	-44.3115
46.7	-50.6287	-44.4946
46.75	-50.6897	-44.3726
46.8	-50.7812	-44.1894
46.85	-50.7812	-44.5557
46.9	-50.6897	-44.342
46.95	-50.6592	-44.22
47	-50.6897	-44.6472
47.05	-50.6897	-44.4031
47.1	-50.5981	-44.1894
47.15	-50.5371	-44.6472
47.2	-50.415	-44.342
47.25	-50.4456	-44.3115
47.3	-50.293	-44.4641
47.35	-50.3235	-44.1894
47.4	-50.4456	-44.5862
47.45	-50.4456	-44.4641
47.5	-50.5981	-44.22
47.55	-50.6287	-44.5862
47.6	-50.7812	-44.4641
47.65	-50.7507	-44.22
47.7	-50.7812	-44.6472
47.75	-50.6592	-44.4031
47.8	-50.7202	-44.3115
47.85	-50.6592	-44.5251
47.9	-50.4761	-44.342
47.95	-50.2319	-44.3115
48	-50.5066	-44.5862
48.05	-50.6592	-44.3726
48.1	-50.6897	-44.1589
48.15	-50.5676	-44.5557
48.2	-50.4456	-44.5251
48.25	-50.5676	-44.1284
48.3	-50.7812	-44.4336
48.35	-50.6592	-44.4641
48.4	-50.3235	-44.2505
48.45	-50.7202	-44.281
48.5	-50.6897	-44.5557
48.55	-50.5066	-44.4641
48.6	-50.4456	-44.0979
48.65	-50.7812	-44.4641
48.7	-50.6287	-44.4641
48.75	-50.3845	-44.342
48.8	-50.6897	-44.22
48.85	-50.5981	-44.5251
48.9	-50.2319	-44.4946
48.95	-50.6897	-44.22
49	-50.6287	-44.342
49.05	-50.2014	-44.5251
49.1	-50.6287	-44.4946
49.15	-50.5066	-44.1589
49.2	-50.2014	-44.4336
49.25	-50.6287	-44.4946
49.3	-50.5371	-44.4641
49.35	-50.2319	-44.1589
49.4	-50.5066	-44.4336
49.45	-50.5981	-44.6472
49.5	-50.4456	-44.4641
49.55	-50.2624	-44.22
49.6	-50.5371	-44.3726
49.65	-50.5371	-44.6472
49.7	-50.354	-44.5862
49.75	-50.3845	-44.3115
49.8	-50.5066	-44.4031
49.85	-50.5676	-44.6167
49.9	-50.2319	-44.5862
49.95	-50.415	-44.4031
50	-50.5371	-44.3115
50.05	-50.5981	-44.6777
50.1	-50.2014	-44.6167
50.15	-50.4456	-44.5251
50.2	-50.5371	-44.281
50.25	-50.5676	-44.4946
50.3	-50.415	-44.6777
50.35	-50.354	-44.6167
50.4	-50.6287	-44.4031
50.45	-50.6592	-44.342
50.5	-50.4761	-44.6472
50.55	-50.1404	-44.5862
50.6	-50.5371	-44.5557
50.65	-50.6287	-44.281
50.7	-50.6287	-44.4031
50.75	-50.2624	-44.6472
50.8	-50.354	-44.6167
50.85	-50.6897	-44.6167
50.9	-50.5981	-44.342
50.95	-50.5371	-44.4031
51	-50.1709	-44.6777
51.05	-50.5371	-44.7082
51.1	-50.6897	-44.6167
51.15	-50.6897	-44.4336
51.2	-50.4456	-44.4336
51.25	-50.3235	-44.8914
51.3	-50.5981	-44.8914
51.35	-50.7812	-44.7082
51.4	-50.6287	-44.6167
51.45	-50.5371	-44.5251
51.5	-50.293	-44.8608
51.55	-50.5371	-44.8608
51.6	-50.7507	-44.8914
51.65	-50.6897	-44.7693
51.7	-50.6592	-44.5862
51.75	-50.3235	-44.7082
51.8	-50.354	-44.9524
51.85	-50.6287	-45.0134
51.9	-50.8118	-45.0134
51.95	-50.7202	-44.7998
52	-50.4761	-44.6472
52.05	-50.3235	-44.7998
52.1	-50.5981	-45.0439
52.15	-50.7812	-45.0439
52.2	-50.7812	-44.9829
52.25	-50.6897	-44.9219
52.3	-50.5981	-44.6777
52.35	-50.415	-44.7082
52.4	-50.5371	-44.9829
52.45	-50.7812	-45.0745
52.5	-50.9033	-45.0134
52.55	-50.7507	-45.0439
52.6	-50.6287	-44.7998
52.65	-50.4761	-44.7082
52.7	-50.5371	-44.8303
52.75	-50.8118	-45.0439
52.8	-50.8423	-45.1355
52.85	-50.7202	-45.0439
52.9	-50.7202	-44.9829
52.95	-50.4761	-44.8914
53	-50.3845	-44.6777
53.05	-50.5371	-44.6472
53.1	-50.8118	-44.9219
53.15	-50.7202	-45.0745
53.2	-50.6897	-45.105
53.25	-50.6592	-44.9829
53.3	-50.5676	-44.9829
53.35	-50.415	-44.9524
53.4	-50.4456	-44.7388
53.45	-50.7202	-44.7082
53.5	-50.7507	-45.0745
53.55	-50.7812	-45.166
53.6	-50.6592	-45.166
53.65	-50.5981	-45.166
53.7	-50.4456	-45.227
53.75	-50.354	-45.227
53.8	-50.3845	-45.0134
53.85	-50.5371	-44.9829
53.9	-50.5676	-44.9829
53.95	-50.7812	-45.0134
54	-50.6592	-45.166
54.05	-50.6592	-45.2881
54.1	-50.5371	-45.4102
54.15	-50.4456	-45.3186
54.2	-50.354	-45.227
54.25	-50.354	-45.227
54.3	-50.3845	-45.1355
54.35	-50.7202	-45.0134
54.4	-50.7812	-44.9524
54.45	-50.6897	-44.9829
54.5	-50.6897	-45.227
54.55	-50.5981	-45.2881
54.6	-50.6287	-45.227
54.65	-50.5066	-45.0745
54.7	-50.4456	-44.9829
54.75	-50.354	-44.9219
54.8	-50.3845	-45.3186
54.85	-50.4456	-45.227
54.9	-50.5981	-45.0439
54.95	-50.7507	-44.8914
55	-50.7812	-45.3186
55.05	-50.7202	-45.1965
55.1	-50.6897	-44.7998
55.15	-50.7202	-45.1965
55.2	-50.6287	-45.227
55.25	-50.6592	-44.7998
55.3	-50.5676	-45.0745
55.35	-50.5371	-45.227
55.4	-50.4456	-44.8608
55.45	-50.415	-45.1355
55.5	-50.354	-45.166
55.55	-50.4761	-44.7388
55.6	-50.5676	-45.166
55.65	-50.5981	-45.0745
55.7	-50.6592	-44.7693
55.75	-50.7202	-45.227
55.8	-50.8118	-45.0439
55.85	-50.8423	-44.8914
55.9	-50.8118	-45.105
55.95	-50.7507	-44.9524
56	-50.8118	-45.1355
56.05	-50.8118	-45.1355
56.1	-50.6897	-44.7693
56.15	-50.5371	-45.1965
56.2	-50.6287	-45.166
56.25	-50.6592	-44.7388
56.3	-50.8118	-45.105
56.35	-50.8423	-45.1965
56.4	-50.9338	-44.8914
56.45	-50.7202	-45.0439
56.5	-50.5981	-45.1355
56.55	-50.9644	-45.0439
56.6	-50.9338	-44.8303
56.65	-50.7812	-45.166
56.7	-50.6287	-45.105
56.75	-51.0559	-44.7693
56.8	-50.9338	-45.105
56.85	-50.6592	-45.166
56.9	-50.9644	-44.9829
56.95	-51.0254	-44.7693
57	-50.5981	-45.227
57.05	-50.8423	-45.105
57.1	-50.9338	-44.7693
57.15	-50.7202	-44.9829
57.2	-50.8728	-45.2881
57.25	-50.9949	-45.1355
57.3	-50.7202	-44.8303
57.35	-50.7812	-45.1355
57.4	-50.9644	-45.3186
57.45	-50.7812	-45.1355
57.5	-50.8728	-44.8608
57.55	-51.0254	-45.1355
57.6	-50.8423	-45.3491
57.65	-50.8423	-45.166
57.7	-51.178	-44.8914
57.75	-50.9949	-45.2576
57.8	-50.6897	-45.2881
57.85	-51.1169	-45.227
57.9	-51.0864	-44.9219
57.95	-50.7812	-45.1965
58	-50.8423	-45.3186
58.05	-51.1169	-45.2881
58.1	-50.9644	-44.7998
58.15	-50.7202	-45.1965
58.2	-50.9949	-45.3186
58.25	-51.0864	-45.2576
58.3	-50.8728	-44.8914
58.35	-50.6592	-45.1355
58.4	-50.9949	-45.4102
58.45	-51.0254	-45.2576
58.5	-50.8728	-45.0745
58.55	-50.5676	-44.8914
58.6	-50.9949	-45.2576
58.65	-50.9949	-45.3186
58.7	-50.9033	-45.1965
58.75	-50.6287	-44.8303
58.8	-50.9033	-45.0134
58.85	-51.0864	-45.227
58.9	-50.9338	-45.227
58.95	-50.5676	-45.0745
59	-50.6287	-44.7082
59.05	-50.9338	-45.0134
59.1	-50.9338	-45.2576
59.15	-50.6592	-45.1355
59.2	-50.4761	-44.9219
59.25	-50.8423	-44.8608
59.3	-50.9033	-45.0745
59.35	-50.7812	-45.2576
59.4	-50.6287	-45.105
59.45	-50.5371	-45.105
59.5	-50.8423	-44.7998
59.55	-50.8423	-44.9524
59.6	-50.7202	-45.1355
59.65	-50.415	-45.2576
59.7	-50.5066	-45.0745
59.75	-50.8728	-44.7388
59.8	-50.7812	-44.8608
59.85	-50.7202	-45.227
59.9	-50.5066	-45.1965
59.95	-50.5371	-45.105
60	-50.7812	-44.9829
60.05	-50.7507	-44.8303
60.1	-50.8423	-45.0439
60.15	-50.5676	-45.1355
60.2	-50.4456	-45.1355
60.25	-50.6897	-45.0134
60.3	-50.9033	-44.9829
60.35	-50.7812	-44.7388
60.4	-50.5676	-44.9524
60.45	-50.415	-45.166
60.5	-50.6897	-45.1355
60.55	-50.8118	-45.105
60.6	-50.7812	-44.9219
60.65	-50.7812	-44.7998
60.7	-50.6287	-44.8303
60.75	-50.4761	-45.0439
60.8	-50.6897	-45.1965
60.85	-50.8118	-45.1355
60.9	-50.7507	-45.0745
60.95	-50.8118	-44.9219
61	-50.5676	-44.7693
61.05	-50.3845	-44.8914
61.1	-50.5981	-45.1355
61.15	-50.9338	-45.166
61.2	-50.8118	-45.105
61.25	-50.7812	-45.0134
61.3	-50.6897	-44.9829
61.35	-50.4761	-44.7693
61.4	-50.5066	-44.7388
61.45	-50.6897	-44.8608
61.5	-50.8728	-45.1355
61.55	-50.8423	-45.166
61.6	-50.7812	-45.0439
61.65	-50.7202	-44.9524
61.7	-50.5066	-44.9829
61.75	-50.5371	-44.7998
61.8	-50.6897	-44.7693
61.85	-50.8423	-44.8303
61.9	-50.8423	-45.105
61.95	-50.8728	-45.166
62	-50.6897	-45.105
62.05	-50.5981	-45.0439
62.1	-50.4456	-45.0439
62.15	-50.5066	-44.9524
62.2	-50.6592	-44.8303
62.25	-50.8118	-44.7082
62.3	-50.8118	-44.8608
62.35	-50.8118	-44.9829
62.4	-50.7507	-45.0439
62.45	-50.5981	-45.0745
62.5	-50.4761	-45.0439
62.55	-50.4761	-45.0745
62.6	-50.5676	-45.0134
62.65	-50.7202	-44.9524
62.7	-50.7812	-44.8914
62.75	-50.8118	-44.6472
62.8	-50.8728	-44.7693
62.85	-50.6897	-44.9219
62.9	-50.7507	-45.105
62.95	-50.5981	-45.0439
63	-50.5676	-44.9829
63.05	-50.354	-44.7388
63.1	-50.5066	-44.7693
63.15	-50.6287	-45.1355
63.2	-50.8118	-45.0439
63.25	-50.8118	-44.7388
63.3	-50.8118	-44.7998
63.35	-50.8423	-45.0745
63.4	-50.7812	-44.9524
63.45	-50.7812	-44.6167
63.5	-50.6897	-45.105
63.55	-50.6287	-45.0745
63.6	-50.4761	-44.6777
63.65	-50.5066	-45.227
63.7	-50.354	-45.0439
63.75	-50.4456	-44.7998
63.8	-50.5981	-45.1965
63.85	-50.7812	-45.0439
63.9	-50.8118	-44.9219
63.95	-50.8423	-45.3491
64	-50.9033	-45.0439
64.05	-50.8728	-45.1355
64.1	-50.7507	-45.2576
64.15	-50.7812	-44.9829
64.2	-50.8423	-45.4102
64.25	-50.8728	-45.2881
64.3	-50.7507	-45.0134
64.35	-50.5981	-45.3796
64.4	-50.6897	-45.2881
64.45	-50.6592	-45.0439
64.5	-50.6287	-45.4407
64.55	-50.8423	-45.2576
64.6	-51.0254	-45.1355
64.65	-50.9338	-45.4407
64.7	-50.7507	-45.227
64.75	-50.4761	-45.105
64.8	-50.8118	-45.4712
64.85	-51.0254	-45.4102
64.9	-50.9033	-45.0134
64.95	-50.7202	-45.5017
65	-50.7507	-45.4407
65.05	-50.9644	-45.1965
65.1	-50.8118	-45.2576
65.15	-50.5066	-45.5017
65.2	-50.9033	-45.2881
65.25	-50.8728	-45.166
65.3	-50.5066	-45.4712
65.35	-50.7812	-45.5017
65.4	-50.8728	-45.2576
65.45	-50.6287	-45.2881
65.5	-50.6897	-45.5627
65.55	-50.8728	-45.4407
65.6	-50.7202	-45.227
65.65	-50.6592	-45.4712
65.7	-50.9338	-45.5627
65.75	-50.6592	-45.4102
65.8	-50.5981	-45.3491
65.85	-50.8728	-45.6848
65.9	-50.6897	-45.5322
65.95	-50.5676	-45.4102
66	-50.8118	-45.3491
66.05	-50.7507	-45.7458
66.1	-50.4456	-45.5933
66.15	-50.8118	-45.5017
66.2	-50.8118	-45.3186
66.25	-50.6287	-45.7153
66.3	-50.7202	-45.5933
66.35	-50.9033	-45.5933
66.4	-50.6897	-45.4407
66.45	-50.5676	-45.7458
66.5	-50.9033	-45.6543
66.55	-50.8423	-45.5322
66.6	-50.7202	-45.2576
66.65	-50.5676	-45.6848
66.7	-50.9644	-45.7153
66.75	-50.9033	-45.6238
66.8	-50.8118	-45.5017
66.85	-50.5981	-45.5017
66.9	-50.9949	-45.7153
66.95	-50.9644	-45.5933
67	-50.8423	-45.4712
67.05	-50.5981	-45.2881
67.1	-50.9949	-45.6848
67.15	-50.9949	-45.6848
67.2	-50.9644	-45.6238
67.25	-50.7812	-45.3491
67.3	-50.8728	-45.5627
67.35	-51.0864	-45.7153
67.4	-51.0864	-45.6543
67.45	-50.8728	-45.5017
67.5	-50.6287	-45.3491
67.55	-50.9949	-45.5322
67.6	-51.0254	-45.6848
67.65	-50.9949	-45.7153
67.7	-50.7507	-45.5627
67.75	-50.7812	-45.2576
67.8	-51.0559	-45.5017
67.85	-50.9949	-45.8069
67.9	-50.9338	-45.6543
67.95	-50.5981	-45.5322
68	-50.8118	-45.2576
68.05	-50.9949	-45.5322
68.1	-51.0254	-45.7153
68.15	-50.9644	-45.6238
68.2	-50.6287	-45.6238
68.25	-50.8118	-45.6238
68.3	-51.1169	-45.4712
68.35	-51.0559	-45.7153
68.4	-50.9949	-45.8374
68.45	-50.6592	-45.7458
68.5	-50.8118	-45.6848
68.55	-51.1169	-45.4102
68.6	-51.178	-45.5933
68.65	-51.0254	-45.8069
68.7	-50.9644	-45.8374
68.75	-50.7812	-45.7764
68.8	-50.9644	-45.5933
68.85	-51.178	-45.4712
68.9	-51.2085	-45.5627
68.95	-51.1475	-45.8374
69	-50.9644	-45.8679
69.05	-50.9033	-45.8069
69.1	-51.2085	-45.6848
69.15	-51.2085	-45.5322
69.2	-51.1169	-45.5017
69.25	-51.1475	-45.7458
69.3	-50.9338	-45.8374
69.35	-50.8423	-45.8679
69.4	-51.0559	-45.7764
69.45	-51.239	-45.6238
69.5	-51.2085	-45.4407
69.55	-51.1169	-45.5017
69.6	-50.9644	-45.6543
69.65	-50.7202	-45.7764
69.7	-50.8118	-45.8069
69.75	-51.0254	-45.8069
69.8	-51.178	-45.6543
69.85	-50.9644	-45.5933
69.9	-51.0254	-45.4712
69.95	-50.8423	-45.6238
70	-50.7812	-45.8069
70.05	-50.6897	-45.8984
70.1	-51.0254	-45.9595
70.15	-51.1169	-45.8679
70.2	-51.0254	-45.8374
70.25	-50.9644	-45.6848
70.3	-50.8118	-45.6848
70.35	-50.8118	-45.6848
70.4	-50.6897	-45.8679
70.45	-50.7812	-45.9595
70.5	-50.9949	-46.0815
70.55	-51.1169	-46.0815
70.6	-51.0559	-45.9595
70.65	-50.9644	-45.99
70.7	-50.9644	-45.8984
70.75	-50.9033	-45.8374
70.8	-50.7202	-45.6543
70.85	-50.6592	-45.8069
70.9	-50.8728	-46.0205
70.95	-50.9949	-46.1121
71	-51.178	-46.0815
71.05	-51.0254	-46.0205
71.1	-51.1169	-46.051
71.15	-51.1169	-45.9595
71.2	-51.0254	-45.8374
71.25	-50.8423	-45.7153
71.3	-50.7812	-46.051
71.35	-50.8118	-46.1731
71.4	-50.9644	-46.1426
71.45	-51.0559	-45.8069
71.5	-51.0864	-45.7764
71.55	-51.2085	-46.0815
71.6	-51.178	-46.0815
71.65	-51.0254	-45.7458
71.7	-51.0559	-45.8069
71.75	-51.0254	-46.0815
71.8	-50.9033	-45.929
71.85	-50.8728	-45.7153
71.9	-50.6592	-46.051
71.95	-50.7202	-46.051
72	-50.7507	-45.7458
72.05	-50.8728	-46.1426
72.1	-50.9338	-45.8374
72.15	-51.0254	-45.8069
72.2	-51.0559	-46.1121
72.25	-51.0254	-45.8374
72.3	-50.9644	-45.929
72.35	-50.9033	-46.1121
72.4	-50.8728	-45.6848
72.45	-50.9338	-46.0205
72.5	-50.8423	-46.0815
72.55	-50.7202	-45.6848
72.6	-50.7507	-46.2036
72.65	-50.6897	-45.8679
72.7	-50.5676	-45.8374
72.75	-50.5371	-46.1121
72.8	-50.8423	-45.99
72.85	-50.9338	-45.7764
72.9	-51.0864	-46.0815
72.95	-50.8728	-45.8679
73	-50.9033	-45.8984
73.05	-50.6592	-46.0205
73.1	-50.8118	-45.8984
73.15	-51.0254	-45.5933
73.2	-51.0254	-46.0815
73.25	-50.7812	-46.0205
73.3	-50.7202	-45.6238
73.35	-51.1169	-45.9595
73.4	-50.9949	-46.0205
73.45	-50.6897	-45.8069
73.5	-50.9033	-45.7458
73.55	-50.9949	-46.051
73.6	-50.8118	-45.99
73.65	-50.9033	-45.6238
73.7	-50.9949	-45.8984
73.75	-50.8728	-45.929
73.8	-50.7507	-45.7458
73.85	-51.0559	-45.6238
73.9	-50.8423	-45.9595
73.95	-50.7202	-45.8984
74	-50.9949	-45.7764
74.05	-50.7507	-45.6848
74.1	-50.7507	-45.9595
74.15	-51.0864	-45.99
74.2	-50.7812	-45.7764
74.25	-50.6897	-45.7458
74.3	-51.0254	-46.0815
74.35	-50.8728	-45.99
74.4	-50.5371	-45.7458
74.45	-50.9949	-45.8069
74.5	-50.9033	-46.051
74.55	-50.5981	-46.0815
74.6	-50.8728	-45.8679
74.65	-50.9338	-45.8679
74.7	-50.7202	-46.0815
74.75	-50.5981	-46.051
74.8	-50.9338	-45.8679
74.85	-50.9644	-45.8374
74.9	-50.6287	-46.051
74.95	-50.6897	-46.051
75	-50.9033	-45.929
75.05	-50.9033	-45.7153
75.1	-50.5981	-46.0205
75.15	-50.7202	-46.0815
75.2	-50.9033	-46.051
75.25	-50.9033	-45.8069
75.3	-50.5371	-45.8374
75.35	-50.5981	-46.0815
75.4	-50.9033	-46.051
75.45	-50.8118	-45.8069
75.5	-50.6287	-45.5933
75.55	-50.4761	-45.9595
75.6	-50.8423	-46.051
75.65	-50.7812	-45.9595
75.7	-50.6592	-45.7153
75.75	-50.3235	-45.6543
75.8	-50.6592	-45.9595
75.85	-50.7812	-45.99
75.9	-50.6592	-45.8984
75.95	-50.415	-45.6238
76	-50.354	-45.6848
76.05	-50.7202	-45.99
76.1	-50.6287	-45.9595
76.15	-50.5981	-45.8374
76.2	-50.1709	-45.5933
76.25	-50.5066	-45.6238
76.3	-50.6592	-45.8984
76.35	-50.6287	-45.8679
76.4	-50.354	-45.8374
76.45	-50.1709	-45.7153
76.5	-50.5066	-45.5627
76.55	-50.6897	-45.7458
76.6	-50.5981	-45.8984
76.65	-50.354	-45.8679
76.7	-50.2319	-45.8374
76.75	-50.4456	-45.5627
76.8	-50.6592	-45.5933
76.85	-50.5371	-45.8679
76.9	-50.5066	-45.99
76.95	-50.2624	-45.8679
77	-50.5066	-45.7764
77.05	-50.6592	-45.6238
77.1	-50.6897	-45.6238
77.15	-50.5676	-45.8679
77.2	-50.354	-45.8984
77.25	-50.293	-45.8679
77.3	-50.6897	-45.8069
77.35	-50.7507	-45.6848
77.4	-50.5981	-45.5627
77.45	-50.4456	-45.7458
77.5	-50.354	-45.8679
77.55	-50.4456	-45.8984
77.6	-50.5676	-45.7458
77.65	-50.5981	-45.6543
77.7	-50.5676	-45.5627
77.75	-50.4456	-45.5933
77.8	-50.293	-45.7458
77.85	-50.2624	-45.8069
77.9	-50.5066	-45.8679
77.95	-50.5676	-45.7764
78	-50.5371	-45.6238
78.05	-50.3845	-45.5627
78.1	-50.3235	-45.5322
78.15	-50.1404	-45.6543
78.2	-50.3845	-45.7153
78.25	-50.4761	-45.7764
78.3	-50.5371	-45.8374
78.35	-50.415	-45.8374
78.4	-50.5371	-45.6543
78.45	-50.2014	-45.5322
78.5	-49.9878	-45.4712
78.55	-50.354	-45.5933
78.6	-50.5981	-45.7458
78.65	-50.5371	-45.8069
78.7	-50.415	-45.8679
78.75	-50.5066	-45.8069
78.8	-50.3235	-45.7153
78.85	-50.1404	-45.6543
78.9	-50.0488	-45.5933
78.95	-50.3235	-45.4102
79	-50.4761	-45.4102
79.05	-50.5066	-45.5017
79.1	-50.4761	-45.7458
79.15	-50.4761	-45.7764
79.2	-50.4761	-45.6543
79.25	-50.2624	-45.6848
79.3	-50.1404	-45.6848
79.35	-50.2319	-45.5322
79.4	-50.4456	-45.3491
79.45	-50.415	-45.3186
79.5	-50.5981	-45.3796
79.55	-50.5676	-45.5933
79.6	-50.5371	-45.6848
79.65	-50.415	-45.5627
79.7	-50.293	-45.4102
79.75	-50.2624	-45.166
79.8	-50.1404	-45.5322
79.85	-50.2014	-45.5322
79.9	-50.3235	-45.4407
79.95	-50.4761	-45.166
80	-50.6287	-45.5933
80.05	-50.5371	-45.5322
80.1	-50.4761	-45.2576
80.15	-50.5066	-45.4712
80.2	-50.415	-45.5017
80.25	-50.354	-45.3491
80.3	-50.2014	-45.4407
80.35	-50.2014	-45.6848
80.4	-50.0793	-45.2576
80.45	-50.1709	-45.5322
80.5	-50.2319	-45.5933
80.55	-50.293	-45.2881
80.6	-50.4761	-45.6848
80.65	-50.5066	-45.5322
80.7	-50.4761	-45.2576
80.75	-50.4456	-45.7458
80.8	-50.5981	-45.4712
80.85	-50.4456	-45.4102
80.9	-50.4761	-45.6848
80.95	-50.4456	-45.2576
81	-50.415	-45.6238
81.05	-50.2624	-45.5322
81.1	-50.1709	-45.2576
81.15	-50.2014	-45.7153
81.2	-50.4456	-45.6238
81.25	-50.5981	-45.166
81.3	-50.5066	-45.6543
81.35	-50.4456	-45.5933
81.4	-50.2624	-45.2881
81.45	-50.2014	-45.4712
81.5	-50.5066	-45.5627
81.55	-50.5066	-45.3186
81.6	-50.354	-45.3186
81.65	-50.1709	-45.5322
81.7	-50.4761	-45.3491
81.75	-50.5371	-45.105
81.8	-50.293	-45.4102
81.85	-50.293	-45.3796
81.9	-50.5066	-45.0439
81.95	-50.354	-45.1965
82	-50.2014	-45.4407
82.05	-50.5371	-45.2881
82.1	-50.3845	-44.9829
82.15	-50.0793	-45.2576
82.2	-50.5066	-45.227
82.25	-50.354	-45.0745
82.3	-50.1404	-44.9524
82.35	-50.4456	-45.2881
82.4	-50.2624	-45.3186
82.45	-50.0488	-45.0134
82.5	-50.415	-44.9829
82.55	-50.2319	-45.227
82.6	-49.8657	-45.2881
82.65	-50.3845	-44.9829
82.7	-50.3235	-45.0745
82.75	-49.8352	-45.2576
82.8	-50.2624	-45.166
82.85	-50.3845	-44.9219
82.9	-50.0488	-44.9829
82.95	-50.1404	-45.1965
83	-50.354	-45.227
83.05	-50.293	-44.8303
83.1	-49.8352	-44.9829
83.15	-50.3235	-45.227
83.2	-50.3235	-45.1965
83.25	-50.1709	-44.8914
83.3	-49.9878	-44.8608
83.35	-50.2624	-45.227
83.4	-50.2014	-45.0745
83.45	-50.1404	-44.9829
83.5	-49.9878	-44.6777
83.55	-50.354	-45.0439
83.6	-50.293	-45.1965
83.65	-50.1099	-45.0134
83.7	-49.9878	-44.7998
83.75	-50.2014	-44.7693
83.8	-50.2014	-45.1965
83.85	-50.0793	-45.0745
83.9	-49.8657	-44.8914
83.95	-50.0793	-44.7082
84	-50.2624	-44.9524
84.05	-50.2014	-45.0745
84.1	-49.9268	-45.105
84.15	-49.9573	-44.8303
84.2	-50.2014	-44.7082
84.25	-50.1709	-45.105
84.3	-50.0183	-45.1965
84.35	-49.7436	-45.0439
84.4	-50.0183	-44.7998
84.45	-50.1709	-44.8303
84.5	-50.0793	-45.1355
84.55	-49.9268	-45.166
84.6	-49.8352	-45.0439
84.65	-50.0488	-45.0134
84.7	-50.1709	-44.8303
84.75	-50.1099	-45.0745
84.8	-49.8962	-45.1965
84.85	-49.8352	-45.2576
84.9	-50.2319	-45.0439
84.95	-50.1404	-44.7998
85	-50.0183	-44.8914
85.05	-49.8657	-45.2576
85.1	-49.8047	-45.3186
85.15	-50.0793	-45.105
85.2	-50.2319	-45.0439
85.25	-50.0488	-44.8608
85.3	-49.9573	-45.105
85.35	-49.7436	-45.2881
85.4	-50.0183	-45.2576
85.45	-50.1404	-45.2576
85.5	-50.1404	-45.0745
85.55	-50.0793	-44.8608
85.6	-49.7742	-45.1355
85.65	-49.8352	-45.2881
85.7	-50.1709	-45.2881
85.75	-50.2319	-45.3186
85.8	-50.0488	-45.105
85.85	-49.9878	-45.105
85.9	-49.8047	-45.0134
85.95	-49.8352	-45.2881
86	-50.0183	-45.3186
86.05	-50.1709	-45.2881
86.1	-50.0793	-45.227
86.15	-49.9573	-45.1965
86.2	-49.6826	-45.0439
86.25	-49.7742	-45.0745
86.3	-49.9878	-45.3186
86.35	-50.0488	-45.5017
86.4	-50.0183	-45.4712
86.45	-49.8962	-45.3491
86.5	-49.8352	-45.3796
86.55	-49.5605	-45.227
86.6	-49.7742	-45.0745
86.65	-49.8962	-45.1965
86.7	-49.9573	-45.5322
86.75	-49.8962	-45.5322
86.8	-49.8657	-45.4407
86.85	-49.7436	-45.3796
86.9	-49.53	-45.4712
86.95	-49.6521	-45.3186
87	-49.8352	-45.166
87.05	-49.9573	-45.1355
87.1	-49.9268	-45.3796
87.15	-49.9268	-45.5017
87.2	-49.8962	-45.5322
87.25	-49.6826	-45.5017
87.3	-49.5605	-45.4712
87.35	-49.6521	-45.4102
87.4	-49.8657	-45.3491
87.45	-49.9268	-45.2881
87.5	-50.0183	-45.166
87.55	-49.9268	-45.1965
87.6	-49.9268	-45.4407
87.65	-49.8047	-45.5627
87.7	-49.6826	-45.6238
87.75	-49.5605	-45.5322
87.8	-49.8047	-45.4712
87.85	-49.8047	-45.2881
87.9	-50.0183	-45.1965
87.95	-49.9878	-45.1965
88	-49.9573	-45.4712
88.05	-49.7742	-45.5322
88.1	-49.8047	-45.4102
88.15	-49.7742	-45.0439
88.2	-49.6216	-45.3796
88.25	-49.5911	-45.4712
88.3	-49.53	-45.3186
88.35	-49.6216	-45.0439
88.4	-49.6521	-45.4712
88.45	-49.8047	-45.4102
88.5	-49.7742	-45.0745
88.55	-49.8047	-45.4102
88.6	-49.7436	-45.4102
88.65	-49.6826	-45.0134
88.7	-49.6521	-45.3796
88.75	-49.5911	-45.4712
88.8	-49.5911	-45.0439
88.85	-49.469	-45.5017
88.9	-49.3164	-45.3796
88.95	-49.3164	-45.166
89	-49.4385	-45.5627
89.05	-49.4385	-45.3186
89.1	-49.5605	-45.3491
89.15	-49.5911	-45.5017
89.2	-49.7436	-45.1355
89.25	-49.7742	-45.4102
89.3	-49.7436	-45.5322
89.35	-49.6521	-45.1355
89.4	-49.6521	-45.5627
89.45	-49.6216	-45.4407
89.5	-49.53	-45.0745
89.55	-49.3469	-45.5322
89.6	-49.5911	-45.4712
89.65	-49.8047	-45.0439
89.7	-49.7131	-45.4102
89.75	-49.6826	-45.5017
89.8	-49.3469	-45.166
89.85	-49.5605	-45.3491
89.9	-49.6826	-45.4712
89.95	-49.7131	-45.3186
90	-49.3774	-45.1965
90.05	-49.5911	-45.5017
90.1	-49.6826	-45.4102
90.15	-49.53	-45.0439
90.2	-49.3774	-45.2881
90.25	-49.7131	-45.3796
90.3	-49.5911	-45.2881
90.35	-49.3164	-44.9524
90.4	-49.7131	-45.4712
90.45	-49.6216	-45.4407
90.5	-49.2859	-45.1355
90.55	-49.6826	-45.1355
90.6	-49.6521	-45.5017
90.65	-49.2249	-45.4102
90.7	-49.6826	-45.1965
90.75	-49.6216	-45.2576
90.8	-49.1638	-45.5322
90.85	-49.6826	-45.4712
90.9	-49.5911	-45.105
90.95	-49.2554	-45.3186
91	-49.6216	-45.5933
91.05	-49.6521	-45.3491
91.1	-49.2249	-45.0439
91.15	-49.5605	-45.3186
91.2	-49.5605	-45.4712
91.25	-49.469	-45.3796
91.3	-49.3774	-45.105
91.35	-49.6826	-45.3186
91.4	-49.5605	-45.5017
91.45	-49.2859	-45.4407
91.5	-49.5605	-45.1965
91.55	-49.6216	-45.1355
91.6	-49.5605	-45.5627
91.65	-49.2859	-45.4102
91.7	-49.6521	-45.166
91.75	-49.6216	-45.0745
91.8	-49.4995	-45.3796
91.85	-49.2859	-45.3491
91.9	-49.7742	-45.2881
91.95	-49.5605	-44.9524
92	-49.53	-45.1355
92.05	-49.1943	-45.3491
92.1	-49.53	-45.3186
92.15	-49.5911	-45.1355
92.2	-49.4995	-44.8303
92.25	-49.2249	-45.3186
92.3	-49.3469	-45.3796
92.35	-49.5911	-45.2881
92.4	-49.469	-45.0134
92.45	-49.2554	-45.0134
92.5	-49.2249	-45.2881
92.55	-49.6216	-45.3186
92.6	-49.4385	-45.227
92.65	-49.4385	-45.0745
92.7	-49.1028	-45.0134
92.75	-49.3774	-45.2576
92.8	-49.469	-45.2881
92.85	-49.3164	-45.3186
92.9	-49.2859	-45.105
92.95	-49.0723	-44.9219
93	-49.3774	-45.1965
93.05	-49.408	-45.4407
93.1	-49.408	-45.2881
93.15	-49.1943	-45.166
93.2	-49.0417	-44.8914
93.25	-49.3164	-45.105
93.3	-49.53	-45.3796
93.35	-49.3164	-45.2576
93.4	-49.1943	-45.227
93.45	-49.0723	-45.0745
93.5	-49.469	-44.9829
93.55	-49.53	-45.1355
93.6	-49.469	-45.3796
93.65	-49.2249	-45.2881
93.7	-49.0417	-45.2881
93.75	-49.3774	-45.0134
93.8	-49.4385	-44.9219
93.85	-49.408	-45.105
93.9	-49.4385	-45.3491
93.95	-49.2249	-45.2576
94	-49.1028	-45.2576
94.05	-49.408	-45.1355
94.1	-49.53	-45.0439
94.15	-49.469	-44.9829
94.2	-49.2554	-45.227
94.25	-49.1638	-45.3186
94.3	-49.1638	-45.2576
94.35	-49.469	-45.2881
94.4	-49.4995	-45.1355
94.45	-49.3774	-45.0745
94.5	-49.3469	-45.0745
94.55	-49.1028	-45.3186
94.6	-49.1333	-45.4102
94.65	-49.3774	-45.2881
94.7	-49.4995	-45.3186
94.75	-49.3469	-45.227
94.8	-49.408	-45.0745
94.85	-49.1638	-44.9829
94.9	-49.0417	-45.0745
94.95	-49.1333	-45.3186
95	-49.408	-45.3796
95.05	-49.3774	-45.2881
95.1	-49.3164	-45.3491
95.15	-49.3469	-45.2881
95.2	-49.1638	-45.1355
95.25	-49.0417	-45.0439
95.3	-49.0112	-45.1355
95.35	-49.3469	-45.166
95.4	-49.469	-45.3186
95.45	-49.2554	-45.4102
95.5	-49.3469	-45.5017
95.55	-49.2859	-45.4712
95.6	-49.1943	-45.4102
95.65	-48.9502	-45.3796
95.7	-49.1333	-45.2576
95.75	-49.3469	-45.2576
95.8	-49.469	-45.166
95.85	-49.408	-45.3491
95.9	-49.3774	-45.4712
95.95	-49.3164	-45.6848
96	-49.2554	-45.6238
96.05	-49.1028	-45.5322
96.1	-49.1333	-45.5627
96.15	-49.2249	-45.4407
96.2	-49.3774	-45.227
96.25	-49.469	-45.3491
96.3	-49.4995	-45.6543
96.35	-49.3774	-45.6543
96.4	-49.4385	-45.6238
96.45	-49.3774	-45.2576
96.5	-49.2554	-45.4102
96.55	-49.1943	-45.7153
96.6	-49.1028	-45.6238
96.65	-49.2554	-45.1965
96.7	-49.2249	-45.5017
96.75	-49.408	-45.5933
96.8	-49.4385	-45.3796
96.85	-49.5911	-45.4407
96.9	-49.3774	-45.5933
96.95	-49.4385	-45.4102
97	-49.4385	-45.4407
97.05	-49.408	-45.5933
97.1	-49.3164	-45.227
97.15	-49.2554	-45.6238
97.2	-49.2249	-45.5933
97.25	-49.1333	-45.2576
97.3	-49.2249	-45.5933
97.35	-49.2249	-45.6238
97.4	-49.3774	-45.3796
97.45	-49.4995	-45.7153
97.5	-49.53	-45.4712
97.55	-49.4385	-45.5933
97.6	-49.5911	-45.6848
97.65	-49.469	-45.2881
97.7	-49.4385	-45.6543
97.75	-49.4385	-45.7458
97.8	-49.4385	-45.2881
97.85	-49.2554	-45.6238
97.9	-49.2859	-45.5933
97.95	-49.4385	-45.3491
98	-49.53	-45.5933
98.05	-49.5911	-45.5322
98.1	-49.2859	-45.3796
98.15	-49.1638	-45.4102
98.2	-49.4385	-45.6543
98.25	-49.4995	-45.4102
98.3	-49.2554	-45.2576
98.35	-49.1028	-45.6238
98.4	-49.4995	-45.5017
98.45	-49.4995	-45.1965
98.5	-49.0723	-45.4407
98.55	-49.3469	-45.5322
98.6	-49.4995	-45.4712
98.65	-49.2554	-45.166
98.7	-49.1943	-45.5017
98.75	-49.53	-45.4712
98.8	-49.2554	-45.227
98.85	-49.1638	-45.3186
98.9	-49.469	-45.5627
98.95	-49.1028	-45.4407
99	-49.1333	-45.2881
99.05	-49.4385	-45.3796
99.1	-49.2554	-45.5933
99.15	-49.0417	-45.4712
99.2	-49.469	-45.166
99.25	-49.1943	-45.4712
99.3	-49.1638	-45.6238
99.35	-49.4995	-45.5017
99.4	-49.3164	-45.2576
99.45	-49.0417	-45.6238
99.5	-49.4385	-45.6543
99.55	-49.408	-45.5627
99.6	-49.2249	-45.2881
99.65	-49.2554	-45.5017
99.7	-49.5605	-45.5933
99.75	-49.3469	-45.6238
99.8	-48.9807	-45.3186
[truncated: 204,453+ more rows]

## Sheet: Figure 2h
	Upper	Lower				Reverse of g where disp precedes current
	C-ms	C-ms
Time	V(mV)
0	-63.5376	-57.5561
0.05	-63.7512	-57.4951
0.1	-63.5681	-57.5867
0.15	-63.5376	-57.6172
0.2	-63.446	-57.5561
0.25	-63.6291	-57.4036
0.3	-63.6291	-57.8003
0.35	-63.5681	-57.5867
0.4	-63.5071	-57.373
0.45	-63.4155	-57.6477
0.5	-63.6902	-57.6172
0.55	-63.6291	-57.4951
0.6	-63.5986	-57.3425
0.65	-63.446	-57.6172
0.7	-63.4766	-57.4646
0.75	-63.6902	-57.3425
0.8	-63.5681	-57.4036
0.85	-63.5071	-57.4646
0.9	-63.3545	-57.4951
0.95	-63.5071	-57.1899
1	-63.6902	-57.4646
1.05	-63.5071	-57.4036
1.1	-63.5071	-57.4951
1.15	-63.2935	-57.251
1.2	-63.4155	-57.5561
1.25	-63.6597	-57.4646
1.3	-63.5376	-57.4341
1.35	-63.5376	-57.3425
1.4	-63.2629	-57.5867
1.45	-63.4155	-57.3425
1.5	-63.5986	-57.4036
1.55	-63.6597	-57.2205
1.6	-63.5071	-57.5256
1.65	-63.4766	-57.4341
1.7	-63.446	-57.373
1.75	-63.4766	-57.2205
1.8	-63.6291	-57.4951
1.85	-63.4766	-57.373
1.9	-63.5376	-57.312
1.95	-63.324	-57.1289
2	-63.2935	-57.4341
2.05	-63.4766	-57.4036
2.1	-63.5681	-57.3425
2.15	-63.4766	-57.312
2.2	-63.4155	-57.373
2.25	-63.385	-57.5561
2.3	-63.2935	-57.4036
2.35	-63.4155	-57.373
2.4	-63.5071	-57.1594
2.45	-63.5376	-57.4951
2.5	-63.5376	-57.4341
2.55	-63.5376	-57.4646
2.6	-63.385	-57.2205
2.65	-63.3545	-57.2815
2.7	-63.5681	-57.4646
2.75	-63.6597	-57.4036
2.8	-63.5071	-57.373
2.85	-63.5071	-57.1899
2.9	-63.4766	-57.4036
2.95	-63.4766	-57.4951
3	-63.324	-57.4036
3.05	-63.4766	-57.373
3.1	-63.6597	-57.0984
3.15	-63.5681	-57.373
3.2	-63.4766	-57.5867
3.25	-63.5071	-57.4341
3.3	-63.446	-57.3425
3.35	-63.2935	-57.1289
3.4	-63.2629	-57.373
3.45	-63.446	-57.5561
3.5	-63.5071	-57.4036
3.55	-63.6291	-57.4646
3.6	-63.4766	-57.2815
3.65	-63.5071	-57.312
3.7	-63.2629	-57.5256
3.75	-63.5986	-57.5561
3.8	-63.6597	-57.4646
3.85	-63.5681	-57.3425
3.9	-63.4155	-57.1594
3.95	-63.5681	-57.373
4	-63.7207	-57.5256
4.05	-63.5681	-57.4341
4.1	-63.2935	-57.4951
4.15	-63.7512	-57.2815
4.2	-63.4766	-57.1899
4.25	-63.3545	-57.4341
4.3	-63.5376	-57.5256
4.35	-63.385	-57.4341
4.4	-63.5681	-57.312
4.45	-63.5681	-57.4036
4.5	-63.2324	-57.1899
4.55	-63.5681	-57.2205
4.6	-63.385	-57.4951
4.65	-63.5681	-57.6172
4.7	-63.5376	-57.4036
4.75	-63.2324	-57.4036
4.8	-63.6291	-57.4036
4.85	-63.4155	-57.2815
4.9	-63.5986	-57.4036
4.95	-63.5376	-57.5867
5	-63.3545	-57.5867
5.05	-63.6597	-57.4646
5.1	-63.385	-57.4036
5.15	-63.446	-57.4341
5.2	-63.6291	-57.2205
5.25	-63.4766	-57.3425
5.3	-63.5376	-57.4036
5.35	-63.4155	-57.6172
5.4	-63.2324	-57.4951
5.45	-63.5071	-57.373
5.5	-63.5376	-57.5561
5.55	-63.2324	-57.4646
5.6	-63.5071	-57.2815
5.65	-63.5071	-57.312
5.7	-63.324	-57.5561
5.75	-63.4766	-57.6477
5.8	-63.446	-57.4951
5.85	-63.4766	-57.5256
5.9	-63.4766	-57.373
5.95	-63.5071	-57.4036
6	-63.446	-57.5561
6.05	-63.2629	-57.5256
6.1	-63.6291	-57.4646
6.15	-63.446	-57.3425
6.2	-63.2324	-57.6172
6.25	-63.5681	-57.4341
6.3	-63.5681	-57.2205
6.35	-63.2935	-57.6172
6.4	-63.3545	-57.5867
6.45	-63.5376	-57.251
6.5	-63.5071	-57.5867
6.55	-63.2629	-57.5256
6.6	-63.5071	-57.5256
6.65	-63.4155	-57.5561
6.7	-63.385	-57.312
6.75	-63.4155	-57.7698
6.8	-63.5376	-57.5256
6.85	-63.4766	-57.5256
6.9	-63.2629	-57.6172
6.95	-63.5071	-57.4036
7	-63.4766	-57.7698
7.05	-63.385	-57.5561
7.1	-63.324	-57.5256
7.15	-63.5986	-57.7087
7.2	-63.4766	-57.4036
7.25	-63.4155	-57.7087
7.3	-63.385	-57.5867
7.35	-63.5681	-57.373
7.4	-63.4155	-57.7087
7.45	-63.2324	-57.6477
7.5	-63.4155	-57.4646
7.55	-63.446	-57.7393
7.6	-63.324	-57.6477
7.65	-63.1714	-57.5561
7.7	-63.3545	-57.7393
7.75	-63.4155	-57.6172
7.8	-63.4155	-57.5867
7.85	-63.1409	-57.7698
7.9	-63.2935	-57.7087
7.95	-63.5071	-57.5561
8	-63.385	-57.8308
8.05	-63.1714	-57.8308
8.1	-63.2629	-57.4341
8.15	-63.5071	-57.8613
8.2	-63.385	-57.7393
8.25	-63.2629	-57.6782
8.3	-63.2019	-57.7393
8.35	-63.4155	-57.7393
8.4	-63.385	-57.7393
8.45	-63.2629	-57.6172
8.5	-63.1714	-57.9224
8.55	-63.4155	-57.8003
8.6	-63.385	-57.5561
8.65	-63.2629	-57.8918
8.7	-63.1714	-57.8613
8.75	-63.2019	-57.8003
8.8	-63.3545	-57.6172
8.85	-63.2629	-58.0749
8.9	-63.2324	-57.9224
8.95	-63.0188	-57.8003
9	-63.324	-57.8308
9.05	-63.324	-58.0444
9.1	-63.324	-57.9529
9.15	-63.2324	-57.7393
9.2	-63.1714	-58.0139
9.25	-63.4155	-57.9834
9.3	-63.385	-57.9529
9.35	-63.2935	-57.7698
9.4	-63.2324	-58.1055
9.45	-63.1409	-57.9834
9.5	-63.2935	-57.8918
9.55	-63.385	-57.8918
9.6	-63.324	-58.0444
9.65	-63.2629	-58.0139
9.7	-63.0493	-57.8613
9.75	-63.2935	-57.8308
9.8	-63.3545	-58.0749
9.85	-63.2935	-57.9834
9.9	-63.2935	-57.9529
9.95	-62.9883	-57.8613
10	-63.1409	-58.1665
10.05	-63.385	-58.0444
10.1	-63.4155	-58.0139
10.15	-63.324	-57.9834
10.2	-63.2324	-58.1665
10.25	-63.1103	-58.0749
10.3	-63.2935	-58.0749
10.35	-63.4766	-57.8918
10.4	-63.3545	-58.197
10.45	-63.446	-58.0749
10.5	-63.324	-58.1055
10.55	-63.0493	-57.8308
10.6	-63.324	-57.9224
10.65	-63.446	-58.0139
10.7	-63.4155	-58.0139
10.75	-63.2935	-57.8918
10.8	-63.2629	-57.8308
10.85	-63.1714	-58.0749
10.9	-63.0798	-58.0139
10.95	-63.2629	-58.0749
11	-63.3545	-57.8613
11.05	-63.2935	-57.9224
11.1	-63.2629	-58.0749
11.15	-63.2324	-58.0444
11.2	-63.1409	-58.1055
11.25	-63.1409	-57.8613
11.3	-63.385	-58.0444
11.35	-63.4155	-58.197
11.4	-63.446	-58.136
11.45	-63.324	-57.9529
11.5	-63.4155	-57.8308
11.55	-63.2629	-58.0749
11.6	-63.1103	-58.1665
11.65	-63.2629	-57.9834
11.7	-63.4766	-57.9834
11.75	-63.4766	-57.8918
11.8	-63.3545	-57.8918
11.85	-63.4155	-58.136
11.9	-63.3545	-58.0139
11.95	-63.2629	-58.0139
12	-63.2935	-57.8918
12.05	-63.4155	-57.7393
12.1	-63.4155	-57.9529
12.15	-63.2935	-58.0749
12.2	-63.1103	-58.0749
12.25	-63.4155	-58.0139
12.3	-63.446	-57.9529
12.35	-63.2324	-57.8308
12.4	-63.324	-58.136
12.45	-63.385	-58.136
12.5	-63.2935	-58.0139
12.55	-63.2935	-58.0749
12.6	-63.446	-57.9224
12.65	-63.1714	-57.8613
12.7	-63.385	-57.9834
12.75	-63.385	-58.1055
12.8	-63.1714	-58.0139
12.85	-63.3545	-57.9529
12.9	-63.2324	-57.8308
12.95	-63.3545	-57.7087
13	-63.4155	-57.7698
13.05	-63.0188	-57.9834
13.1	-63.4155	-57.9834
13.15	-63.2019	-57.8918
13.2	-63.2935	-57.9224
13.25	-63.2935	-57.8918
13.3	-63.0493	-57.7698
13.35	-63.4155	-57.7393
13.4	-63.2935	-57.8918
13.45	-63.2019	-58.0749
13.5	-63.324	-58.0444
13.55	-63.2019	-57.9834
13.6	-63.446	-57.9224
13.65	-63.3545	-57.8308
13.7	-63.1714	-57.7393
13.75	-63.4766	-57.8003
13.8	-63.5071	-57.9529
13.85	-63.2629	-57.9834
13.9	-63.446	-57.9529
13.95	-63.385	-57.8613
14	-63.2324	-57.8308
14.05	-63.5986	-57.7698
14.1	-63.385	-57.6782
14.15	-63.2324	-57.9224
14.2	-63.4155	-57.8918
14.25	-63.446	-57.8308
14.3	-63.324	-57.8918
14.35	-63.2629	-57.6172
14.4	-63.5986	-57.9529
14.45	-63.4766	-57.8613
14.5	-63.1103	-57.8613
14.55	-63.5376	-57.9224
14.6	-63.385	-57.9224
14.65	-63.385	-57.8003
14.7	-63.3545	-58.0139
14.75	-63.5071	-57.9529
14.8	-63.385	-57.7087
14.85	-63.3545	-58.0444
14.9	-63.6902	-57.9834
14.95	-63.446	-57.8918
15	-63.2935	-57.9529
15.05	-63.5071	-57.7698
15.1	-63.5986	-58.0749
15.15	-63.446	-57.9224
15.2	-63.2324	-57.9224
15.25	-63.5986	-58.0139
15.3	-63.5376	-57.7393
15.35	-63.446	-58.1665
15.4	-63.385	-57.9529
15.45	-63.6291	-57.9834
15.5	-63.5071	-58.0444
15.55	-63.324	-57.8308
15.6	-63.4155	-58.1665
15.65	-63.5681	-58.0139
15.7	-63.446	-58.0139
15.75	-63.2935	-58.0749
15.8	-63.5071	-58.0139
15.85	-63.5376	-58.0749
15.9	-63.4766	-58.0444
15.95	-63.385	-57.8003
16	-63.5376	-58.2275
16.05	-63.5681	-58.1055
16.1	-63.5376	-57.7393
16.15	-63.3545	-58.197
16.2	-63.5681	-58.0444
16.25	-63.6291	-57.8003
16.3	-63.5376	-58.1665
16.35	-63.324	-58.0444
16.4	-63.5681	-57.8918
16.45	-63.5986	-58.2275
16.5	-63.5986	-58.136
16.55	-63.3545	-57.9834
16.6	-63.4766	-58.2275
16.65	-63.6597	-58.197
16.7	-63.5071	-58.1055
16.75	-63.4766	-58.0749
16.8	-63.3545	-58.3496
16.85	-63.5986	-58.2275
16.9	-63.5376	-57.9224
16.95	-63.6291	-58.3496
17	-63.2935	-58.3496
17.05	-63.5986	-58.1055
17.1	-63.6902	-58.2275
17.15	-63.5986	-58.2886
17.2	-63.5376	-58.136
17.25	-63.385	-58.0444
17.3	-63.6291	-58.3191
17.35	-63.6902	-58.197
17.4	-63.5986	-57.9834
17.45	-63.4155	-58.2886
17.5	-63.385	-58.2275
17.55	-63.7207	-58.136
17.6	-63.5681	-58.0444
17.65	-63.5986	-58.3191
17.7	-63.324	-58.197
17.75	-63.4155	-57.9834
17.8	-63.6291	-58.1665
17.85	-63.5986	-58.3496
17.9	-63.5376	-58.2886
17.95	-63.4155	-57.9529
18	-63.446	-58.3191
18.05	-63.5681	-58.2275
18.1	-63.6902	-58.197
18.15	-63.5376	-57.9529
18.2	-63.5681	-58.2886
18.25	-63.385	-58.2886
18.3	-63.5986	-58.1055
18.35	-63.6902	-58.0749
18.4	-63.5986	-58.2886
18.45	-63.6291	-58.2275
18.5	-63.4766	-58.1665
18.55	-63.324	-58.136
18.6	-63.5986	-58.3801
18.65	-63.7207	-58.3191
18.7	-63.5681	-58.2581
18.75	-63.5681	-58.0749
18.8	-63.385	-58.3801
18.85	-63.446	-58.2275
18.9	-63.6597	-58.3191
18.95	-63.5681	-58.197
19	-63.5681	-58.4412
19.05	-63.5986	-58.3496
19.1	-63.4766	-58.4106
19.15	-63.446	-58.1665
19.2	-63.5071	-58.3496
19.25	-63.7512	-58.4412
19.3	-63.7207	-58.4412
19.35	-63.5376	-58.2886
19.4	-63.5986	-58.2581
19.45	-63.5681	-58.4412
19.5	-63.4766	-58.4412
19.55	-63.5681	-58.3191
19.6	-63.6597	-58.1665
19.65	-63.7207	-58.3191
19.7	-63.6291	-58.4106
19.75	-63.5986	-58.3801
19.8	-63.4766	-58.2886
19.85	-63.446	-58.2275
19.9	-63.446	-58.4106
19.95	-63.6597	-58.5327
20	-63.6902	-58.4106
20.05	-63.5986	-58.2581
20.1	-63.6291	-58.2581
20.15	-63.5986	-58.5632
20.2	-63.5071	-58.5022
20.25	-63.385	-58.4717
20.3	-63.6597	-58.3191
20.35	-63.7207	-58.2275
20.4	-63.6291	-58.5632
20.45	-63.6291	-58.4717
20.5	-63.5071	-58.4412
20.55	-63.7817	-58.3801
20.6	-63.6902	-58.2275
20.65	-63.6291	-58.4106
20.7	-63.4766	-58.4717
20.75	-63.7817	-58.3496
20.8	-63.6291	-58.4412
20.85	-63.446	-58.3801
20.9	-63.7207	-58.197
20.95	-63.5376	-58.3801
21	-63.6597	-58.5327
21.05	-63.6291	-58.4412
21.1	-63.3545	-58.3191
21.15	-63.7207	-58.1665
21.2	-63.5986	-58.3191
21.25	-63.5986	-58.5022
21.3	-63.6597	-58.5022
21.35	-63.4766	-58.4717
21.4	-63.7512	-58.3801
21.45	-63.6291	-58.3496
21.5	-63.6597	-58.136
21.55	-63.7817	-58.3801
21.6	-63.4766	-58.4717
21.65	-63.8428	-58.4106
21.7	-63.7207	-58.3801
21.75	-63.5071	-58.3191
21.8	-63.8428	-58.1665
21.85	-63.5681	-58.197
21.9	-63.6597	-58.4717
21.95	-63.7817	-58.4106
22	-63.5986	-58.3191
22.05	-63.7512	-58.4106
22.1	-63.6291	-58.2275
22.15	-63.5071	-58.197
22.2	-63.7512	-58.136
22.25	-63.6902	-58.3801
22.3	-63.5681	-58.4106
22.35	-63.7512	-58.3496
22.4	-63.7817	-58.3191
22.45	-63.5986	-58.2886
22.5	-63.7512	-58.1665
22.55	-63.8123	-58.2581
22.6	-63.7207	-58.4106
22.65	-63.6291	-58.3496
22.7	-63.8428	-58.136
22.75	-63.8123	-58.1055
22.8	-63.5986	-58.2275
22.85	-63.9343	-58.136
22.9	-63.7817	-57.8918
22.95	-63.6291	-58.2886
23	-63.7817	-58.0749
23.05	-63.8428	-57.8308
23.1	-63.7207	-58.136
23.15	-63.5071	-58.0139
23.2	-63.8428	-58.0139
23.25	-63.7817	-58.0444
23.3	-63.5986	-57.8613
23.35	-63.6902	-58.1055
23.4	-63.7512	-57.9529
23.45	-63.7512	-58.0444
23.5	-63.5986	-58.1055
23.55	-63.9038	-57.8003
23.6	-63.6902	-58.0749
23.65	-63.7817	-57.8918
23.7	-63.7207	-58.1055
23.75	-63.9648	-58.1665
23.8	-63.8733	-57.7698
23.85	-63.5986	-58.1055
23.9	-63.9343	-57.8918
23.95	-63.8123	-58.0444
24	-63.7817	-57.9224
24.05	-63.5986	-57.5561
24.1	-63.9648	-58.0139
24.15	-63.7817	-57.9529
24.2	-63.7512	-57.7393
24.25	-63.6291	-57.9834
24.3	-63.9038	-57.8918
24.35	-63.8733	-57.8308
24.4	-63.7817	-58.0139
24.45	-63.6291	-57.8613
24.5	-63.9648	-57.8003
24.55	-63.8123	-58.0444
24.6	-63.7207	-57.8613
24.65	-63.5376	-57.8308
24.7	-63.9038	-58.0444
24.75	-63.8428	-57.9834
24.8	-63.8123	-57.8613
24.85	-63.6291	-58.0139
24.9	-63.9343	-57.9834
24.95	-63.9343	-57.8308
25	-63.9038	-58.0749
25.05	-63.6902	-57.9529
25.1	-63.8733	-57.6477
25.15	-63.9954	-58.0444
25.2	-63.8428	-57.9224
25.25	-63.7207	-57.8613
25.3	-63.6902	-57.8613
25.35	-63.9648	-57.9834
25.4	-63.8733	-57.9529
25.45	-63.8733	-57.7393
25.5	-63.7207	-58.0139
25.55	-63.7817	-57.8918
25.6	-63.9954	-57.6782
25.65	-63.8123	-57.9224
25.7	-63.8428	-57.9834
25.75	-63.7817	-57.8918
25.8	-63.8733	-57.8308
25.85	-63.9954	-58.136
25.9	-63.9648	-57.9529
25.95	-63.9343	-57.7393
26	-63.7207	-58.0444
26.05	-63.9648	-58.0749
26.1	-64.0259	-57.8918
26.15	-63.9954	-57.7698
26.2	-64.0259	-58.1055
26.25	-63.7512	-57.9834
26.3	-63.9648	-57.8918
26.35	-64.0869	-57.7393
26.4	-63.9648	-58.0139
26.45	-63.9343	-57.9224
26.5	-63.7817	-57.7393
26.55	-63.8733	-57.8918
26.6	-64.0869	-57.9834
26.65	-64.0564	-57.9529
26.7	-63.9648	-57.7393
26.75	-63.8733	-57.9834
26.8	-63.7817	-57.9529
26.85	-63.9954	-57.9529
26.9	-64.0869	-57.6782
26.95	-63.9343	-57.9224
27	-64.1174	-57.9224
27.05	-63.9038	-57.8613
27.1	-63.7817	-57.8003
27.15	-64.0259	-57.8613
27.2	-64.2395	-57.9529
27.25	-64.1174	-57.9224
27.3	-64.0259	-57.7393
27.35	-64.0259	-57.8613
27.4	-63.9343	-57.9224
27.45	-64.0869	-57.9224
27.5	-64.209	-57.7698
27.55	-64.1785	-57.7393
27.6	-64.1174	-57.9224
27.65	-64.0869	-57.8003
27.7	-64.0869	-57.8003
27.75	-63.9038	-57.5867
27.8	-64.1174	-57.9224
27.85	-64.2395	-57.8613
27.9	-64.2395	-57.8613
27.95	-64.0869	-57.7087
28	-64.1174	-57.7087
28.05	-64.0869	-57.9529
28.1	-63.9343	-57.8613
28.15	-64.0564	-57.8918
28.2	-64.209	-57.6172
28.25	-64.331	-57.7698
28.3	-64.209	-57.8918
28.35	-64.1479	-57.7698
28.4	-64.209	-57.7393
28.45	-64.0259	-57.4341
28.5	-63.9954	-57.7087
28.55	-64.1479	-57.8003
28.6	-64.27	-57.6782
28.65	-64.1479	-57.6172
28.7	-64.27	-57.4036
28.75	-63.9954	-57.5561
28.8	-64.0564	-57.7087
28.85	-64.3005	-57.6477
28.9	-64.1785	-57.6477
28.95	-64.0259	-57.4951
29	-64.1479	-57.4036
29.05	-64.209	-57.7087
29.1	-64.209	-57.6782
29.15	-64.1479	-57.5867
29.2	-64.27	-57.5256
29.25	-64.0564	-57.2815
29.3	-64.331	-57.4341
29.35	-64.3005	-57.6477
29.4	-63.9648	-57.4951
29.45	-64.3921	-57.4646
29.5	-64.3005	-57.312
29.55	-64.2395	-57.251
29.6	-64.2395	-57.4646
29.65	-64.0259	-57.5561
29.7	-64.3921	-57.4036
29.75	-64.1785	-57.4341
29.8	-64.1479	-57.3425
29.85	-64.1479	-57.1899
29.9	-64.0564	-57.4036
29.95	-64.27	-57.5561
30	-64.209	-57.6477
30.05	-63.9648	-57.4646
30.1	-64.2395	-57.4951
30.15	-64.1174	-57.4341
30.2	-64.0869	-57.373
30.25	-64.209	-57.5561
30.3	-64.1174	-57.6172
30.35	-64.2395	-57.5561
30.4	-64.2395	-57.4951
30.45	-64.1174	-57.4951
30.5	-64.1785	-57.4036
30.55	-64.3005	-57.2815
30.6	-64.209	-57.4646
30.65	-64.1479	-57.5867
30.7	-64.2395	-57.5561
30.75	-64.27	-57.4646
30.8	-64.0564	-57.4951
30.85	-64.3005	-57.373
30.9	-64.1785	-57.4036
30.95	-63.9954	-57.4951
31	-64.27	-57.373
31.05	-64.27	-57.373
31.1	-64.0259	-57.312
31.15	-64.209	-57.5256
31.2	-64.3005	-57.4646
31.25	-64.209	-57.251
31.3	-64.0869	-57.6172
31.35	-64.331	-57.4646
31.4	-64.2395	-57.2815
31.45	-64.0259	-57.5867
31.5	-64.27	-57.5561
31.55	-64.3005	-57.373
31.6	-64.1785	-57.5256
31.65	-63.9954	-57.1899
31.7	-64.27	-57.5256
31.75	-64.1785	-57.3425
31.8	-64.1785	-57.4341
31.85	-64.2395	-57.4341
31.9	-64.3005	-57.1594
31.95	-64.1785	-57.4951
32	-63.9648	-57.251
32.05	-64.2395	-57.4646
32.1	-64.2395	-57.4646
32.15	-64.1479	-57.2205
32.2	-63.9343	-57.4341
32.25	-64.27	-57.251
32.3	-64.1479	-57.6782
32.35	-64.1479	-57.4951
32.4	-63.9954	-57.2815
32.45	-64.4226	-57.5867
32.5	-64.1785	-57.4341
32.55	-64.0869	-57.4036
32.6	-63.9648	-57.4036
32.65	-64.3005	-57.3425
32.7	-64.1785	-57.4341
32.75	-64.0259	-57.4341
32.8	-63.9648	-57.2815
32.85	-64.3616	-57.312
32.9	-64.209	-57.4341
32.95	-64.1479	-57.2205
33	-63.9038	-57.4036
33.05	-64.2395	-57.2815
33.1	-64.1479	-57.251
33.15	-64.1785	-57.373
33.2	-63.8733	-57.4341
33.25	-64.0869	-57.3425
33.3	-64.2395	-57.2205
33.35	-64.1785	-57.4951
33.4	-63.9038	-57.373
33.45	-63.9343	-57.1594
33.5	-64.27	-57.5256
33.55	-64.1174	-57.4341
33.6	-63.9954	-57.2205
33.65	-63.8428	-57.373
33.7	-64.1479	-57.312
33.75	-64.209	-57.2815
33.8	-64.0259	-57.4036
33.85	-63.9648	-57.3425
33.9	-63.9038	-57.251
33.95	-64.1785	-57.1899
34	-64.0564	-57.4341
34.05	-63.9954	-57.3425
34.1	-63.9343	-57.0679
34.15	-63.8428	-57.373
34.2	-64.0564	-57.2815
34.25	-64.0564	-57.251
34.3	-64.0259	-57.1289
34.35	-63.9038	-57.373
34.4	-63.8428	-57.3425
34.45	-63.9954	-57.1289
34.5	-63.9954	-57.312
34.55	-64.0259	-57.312
34.6	-63.8428	-57.373
34.65	-63.8123	-57.0679
34.7	-64.0259	-57.4341
34.75	-64.1785	-57.251
34.8	-64.0259	-57.2205
34.85	-64.0259	-57.251
34.9	-63.9038	-57.373
34.95	-63.9038	-57.251
35	-64.1785	-57.2205
35.05	-64.0564	-57.1899
35.1	-64.0259	-57.373
35.15	-64.0259	-57.2815
35.2	-63.9343	-57.0984
35.25	-63.8733	-57.2205
35.3	-64.0869	-57.2815
35.35	-64.1174	-57.2205
35.4	-64.0564	-57.0679
35.45	-64.0259	-57.2205
35.5	-63.9038	-57.312
35.55	-63.8428	-57.3425
35.6	-64.0564	-57.1289
35.65	-64.1479	-57.312
35.7	-64.0259	-57.373
35.75	-63.9954	-57.312
35.8	-64.0564	-57.1899
35.85	-63.7817	-57.1899
35.9	-63.9648	-57.4951
35.95	-64.1785	-57.251
36	-64.209	-57.1594
36.05	-64.0869	-57.1594
36.1	-64.0869	-57.4341
36.15	-63.9648	-57.2815
36.2	-63.9038	-57.251
36.25	-63.9954	-57.1594
36.3	-64.0259	-57.251
36.35	-64.1785	-57.4036
36.4	-64.1174	-57.2815
36.45	-64.0869	-57.2815
36.5	-64.0869	-57.1289
36.55	-63.9954	-57.4646
36.6	-63.8428	-57.4341
36.65	-63.9648	-57.3425
36.7	-64.1785	-57.312
36.75	-64.1785	-57.1899
36.8	-64.0564	-57.4341
36.85	-64.1479	-57.4341
36.9	-64.1785	-57.4646
36.95	-64.0564	-57.373
37	-63.9343	-57.1594
37.05	-64.2395	-57.5256
37.1	-64.3005	-57.4646
37.15	-64.1785	-57.5256
37.2	-63.9648	-57.373
37.25	-64.1174	-57.2205
37.3	-64.27	-57.4951
37.35	-64.1174	-57.4951
37.4	-63.9648	-57.4341
37.45	-64.3005	-57.373
37.5	-64.1785	-57.251
37.55	-64.0259	-57.4036
37.6	-64.1479	-57.5561
37.65	-64.0869	-57.4341
37.7	-64.1479	-57.4341
37.75	-64.209	-57.4036
37.8	-63.8733	-57.1594
37.85	-64.1785	-57.4951
37.9	-64.1174	-57.5561
37.95	-64.2395	-57.5256
38	-64.1479	-57.4646
38.05	-63.8428	-57.3425
38.1	-64.27	-57.2205
38.15	-64.1479	-57.6172
38.2	-64.1479	-57.6172
38.25	-64.1479	-57.4951
38.3	-63.9038	-57.4951
38.35	-64.331	-57.4341
38.4	-64.1479	-57.3425
38.45	-63.9954	-57.4341
38.5	-64.331	-57.5256
38.55	-64.0869	-57.5867
38.6	-64.0259	-57.4646
38.65	-64.1174	-57.4341
38.7	-63.9954	-57.4036
38.75	-64.0869	-57.251
38.8	-64.1174	-57.4646
38.85	-63.9038	-57.6172
38.9	-63.9954	-57.5256
38.95	-64.0564	-57.4341
39	-63.9954	-57.5561
39.05	-63.9648	-57.373
39.1	-64.0564	-57.251
39.15	-63.9954	-57.4646
39.2	-63.9038	-57.6172
39.25	-64.1785	-57.5867
39.3	-64.0259	-57.312
39.35	-63.8428	-57.4036
39.4	-64.1785	-57.6782
39.45	-64.0259	-57.6477
39.5	-63.8428	-57.373
39.55	-64.0564	-57.5256
39.6	-64.209	-57.5561
39.65	-63.9954	-57.4951
39.7	-63.8733	-57.6172
39.75	-64.209	-57.5256
39.8	-64.0564	-57.3425
39.85	-63.8733	-57.7087
39.9	-64.0259	-57.5867
39.95	-64.0564	-57.4341
40	-63.9343	-57.5867
40.05	-63.8428	-57.373
40.1	-64.1174	-57.7393
40.15	-64.0259	-57.5561
40.2	-63.9038	-57.4646
40.25	-63.9954	-57.6477
40.3	-64.1174	-57.3425
40.35	-64.0259	-57.7393
40.4	-63.8428	-57.6477
40.45	-64.1479	-57.7087
40.5	-63.9343	-57.7087
40.55	-63.9343	-57.4036
40.6	-63.7817	-57.6477
40.65	-64.1479	-57.5867
40.7	-63.9343	-57.6782
40.75	-63.8733	-57.6782
40.8	-63.8428	-57.4036
40.85	-64.1174	-57.7698
40.9	-63.9648	-57.6477
40.95	-63.9038	-57.4646
41	-63.7817	-57.8003
41.05	-64.0869	-57.6782
41.1	-64.0259	-57.4951
41.15	-63.8123	-57.8308
41.2	-63.7817	-57.7393
41.25	-64.1174	-57.5561
41.3	-63.9648	-57.9224
41.35	-63.9648	-57.8308
41.4	-63.7512	-57.4341
41.45	-64.1785	-57.8918
41.5	-63.9954	-57.8308
41.55	-63.9954	-57.6172
41.6	-63.8428	-57.8918
41.65	-64.1174	-57.7393
41.7	-64.209	-57.7087
41.75	-64.1174	-57.8003
41.8	-63.9038	-57.8613
41.85	-63.9343	-57.7087
41.9	-64.1785	-57.6172
41.95	-63.9954	-57.8918
42	-63.9038	-57.7698
42.05	-63.7817	-57.5867
42.1	-63.9648	-57.8308
42.15	-64.1174	-57.8918
42.2	-63.9954	-57.5867
42.25	-63.9038	-57.8613
42.3	-63.7817	-57.8003
42.35	-64.1174	-57.8308
42.4	-64.0564	-57.5867
42.45	-64.0564	-57.9529
42.5	-63.9954	-57.8613
42.55	-63.9038	-57.6477
42.6	-64.1785	-57.8918
42.65	-64.0869	-57.8918
42.7	-64.209	-57.7393
42.75	-64.0869	-57.5867
42.8	-63.8733	-57.8918
42.85	-64.0869	-57.8308
42.9	-64.209	-57.6172
42.95	-64.1479	-57.7393
43	-63.9648	-57.8308
43.05	-63.9343	-57.7698
43.1	-64.1479	-57.4646
43.15	-64.209	-57.6172
43.2	-64.0564	-57.7698
43.25	-64.0564	-57.7087
43.3	-63.9343	-57.4951
43.35	-63.9648	-57.7698
43.4	-64.1785	-57.8308
43.45	-64.1479	-57.6782
43.5	-64.0259	-57.5561
43.55	-64.0259	-57.8308
43.6	-63.8123	-57.8003
43.65	-63.9648	-57.7698
43.7	-64.1785	-57.4341
43.75	-64.1785	-57.7698
43.8	-64.1174	-57.8003
43.85	-64.0259	-57.7393
43.9	-63.8733	-57.4341
43.95	-63.9343	-57.7393
44	-64.1785	-57.7393
44.05	-64.1785	-57.7087
44.1	-64.0564	-57.4951
44.15	-64.1785	-57.6172
44.2	-63.9648	-57.7698
44.25	-63.9038	-57.7393
44.3	-63.9343	-57.6172
44.35	-64.1785	-57.5867
44.4	-64.1479	-57.8308
44.45	-64.1479	-57.6477
44.5	-64.0564	-57.6172
44.55	-63.9343	-57.373
44.6	-63.9038	-57.6782
44.65	-64.0259	-57.8003
44.7	-64.1479	-57.8003
44.75	-64.1785	-57.5256
44.8	-64.1785	-57.4036
44.85	-64.1174	-57.7698
44.9	-64.0564	-57.7087
44.95	-63.9648	-57.5561
45	-63.9648	-57.4646
45.05	-64.1174	-57.5867
45.1	-64.0869	-57.7698
45.15	-64.2395	-57.5867
45.2	-64.1174	-57.4951
45.25	-64.1479	-57.4646
45.3	-63.9648	-57.5256
45.35	-63.9038	-57.6782
45.4	-64.1785	-57.5561
45.45	-64.1479	-57.5561
45.5	-64.0564	-57.4341
45.55	-63.8733	-57.4646
45.6	-64.0869	-57.6477
45.65	-64.1174	-57.6172
45.7	-63.9954	-57.7393
45.75	-63.9954	-57.5867
45.8	-64.0869	-57.373
45.85	-64.0869	-57.7087
45.9	-63.9038	-57.8308
45.95	-64.0259	-57.6172
46	-63.9038	-57.5561
46.05	-64.1174	-57.4951
46.1	-64.0869	-57.4951
46.15	-63.7512	-57.7393
46.2	-64.0869	-57.7393
46.25	-63.9343	-57.6172
46.3	-64.1785	-57.6172
46.35	-63.9954	-57.4646
46.4	-63.7207	-57.5256
46.45	-64.0259	-57.6782
46.5	-63.8123	-57.7393
46.55	-64.0259	-57.7087
46.6	-63.9954	-57.7087
46.65	-63.7207	-57.5867
46.7	-64.0259	-57.5256
46.75	-63.9648	-57.7087
46.8	-63.9038	-57.8308
46.85	-63.9648	-57.8003
46.9	-63.9038	-57.8308
46.95	-64.0259	-57.8003
47	-64.0259	-57.8003
47.05	-63.8123	-57.5867
47.1	-64.1785	-57.7698
47.15	-64.0259	-57.9529
47.2	-63.7512	-57.8918
47.25	-64.0564	-57.8308
47.3	-64.0259	-57.8308
47.35	-63.8733	-57.9224
47.4	-63.9038	-57.7087
47.45	-63.9954	-57.9224
47.5	-63.9038	-57.9529
47.55	-63.8733	-57.9224
47.6	-63.9954	-57.9529
47.65	-63.8428	-57.7698
47.7	-63.6291	-57.9224
47.75	-64.0564	-58.0139
47.8	-63.9343	-58.0139
47.85	-63.7512	-57.8003
47.9	-63.9648	-58.0749
47.95	-63.9343	-57.9834
48	-63.8123	-57.7087
48.05	-63.7512	-58.1665
48.1	-64.0869	-57.9834
48.15	-64.0869	-57.8308
48.2	-63.7817	-57.9834
48.25	-63.9648	-57.8918
48.3	-64.0259	-58.1055
48.35	-63.9343	-57.9834
48.4	-63.8733	-57.8308
48.45	-63.9954	-58.0749
48.5	-63.9954	-57.8308
48.55	-63.7512	-58.1055
48.6	-63.9648	-57.9529
48.65	-63.9343	-57.9834
48.7	-63.8428	-58.0139
48.75	-63.6597	-57.7087
48.8	-63.9648	-58.0444
48.85	-63.9038	-57.9834
48.9	-63.7817	-57.9834
48.95	-63.7207	-58.0444
49	-64.0259	-57.6477
49.05	-63.8428	-58.136
49.1	-63.7512	-57.9834
49.15	-63.7207	-57.8613
49.2	-64.1479	-58.1055
49.25	-63.9038	-57.9834
49.3	-63.8733	-57.9224
49.35	-63.8123	-57.9834
49.4	-64.0869	-57.9529
49.45	-63.9954	-57.9834
49.5	-63.7817	-58.1055
49.55	-63.6902	-57.8308
49.6	-64.0259	-57.9224
49.65	-63.9648	-57.9834
49.7	-63.8123	-57.9834
49.75	-63.6597	-57.8613
49.8	-63.9954	-58.0749
49.85	-63.9038	-57.8918
49.9	-63.8733	-57.9224
49.95	-63.5376	-58.1055
50	-63.8428	-58.0749
50.05	-63.9038	-57.8003
50.1	-63.8733	-58.1665
50.15	-63.6902	-58.136
50.2	-63.7207	-57.8308
50.25	-63.9954	-58.1665
50.3	-63.8428	-58.197
50.35	-63.8123	-58.0444
50.4	-63.6291	-58.0139
50.45	-63.9648	-58.197
50.5	-64.0564	-58.136
50.55	-63.8428	-57.9224
50.6	-63.7817	-58.136
50.65	-63.6902	-58.1055
50.7	-64.0259	-58.0444
50.75	-63.8733	-58.0749
50.8	-63.8428	-58.2581
50.85	-63.7512	-58.0444
50.9	-63.5986	-57.8613
50.95	-63.8428	-58.1665
51	-63.8123	-58.1055
51.05	-63.7512	-58.0139
51.1	-63.5681	-57.9834
51.15	-63.5681	-58.2581
51.2	-63.7817	-58.136
51.25	-63.7817	-57.9224
51.3	-63.7512	-58.1665
51.35	-63.6902	-58.2886
51.4	-63.446	-58.1665
51.45	-63.6902	-57.9529
51.5	-63.9343	-58.2886
51.55	-63.7512	-58.1665
51.6	-63.6597	-58.1665
51.65	-63.5071	-58.0139
51.7	-63.6291	-58.2581
51.75	-63.8733	-58.2275
51.8	-63.7817	-58.0444
51.85	-63.7512	-58.0749
51.9	-63.6291	-58.2886
51.95	-63.5681	-58.2581
52	-63.5376	-58.0139
52.05	-63.7207	-58.0139
52.1	-63.7817	-58.197
52.15	-63.6597	-58.197
52.2	-63.6902	-58.1665
52.25	-63.4155	-58.0749
52.3	-63.5071	-58.3496
52.35	-63.6902	-58.197
52.4	-63.7512	-58.2581
52.45	-63.6597	-58.0749
52.5	-63.6291	-58.3496
52.55	-63.6291	-58.3496
52.6	-63.3545	-58.3496
52.65	-63.5986	-58.136
52.7	-63.6902	-58.2275
52.75	-63.8123	-58.4106
52.8	-63.6902	-58.3801
52.85	-63.6902	-58.2581
52.9	-63.6291	-58.1055
52.95	-63.5376	-58.4106
53	-63.5986	-58.4106
53.05	-63.7512	-58.3191
53.1	-63.8428	-58.1665
53.15	-63.8123	-58.2275
53.2	-63.7817	-58.5022
53.25	-63.6902	-58.3801
53.3	-63.6291	-58.4412
53.35	-63.5681	-58.136
53.4	-63.5986	-58.3496
53.45	-63.7512	-58.6243
53.5	-63.8123	-58.4412
53.55	-63.7207	-58.4106
53.6	-63.8123	-58.2581
53.65	-63.6902	-58.5022
53.7	-63.5071	-58.6548
53.75	-63.6902	-58.4412
53.8	-63.9648	-58.4412
53.85	-63.8123	-58.2886
53.9	-63.6597	-58.3801
53.95	-63.7207	-58.6243
54	-63.8733	-58.4106
54.05	-63.8123	-58.4717
54.1	-63.5376	-58.3801
54.15	-63.8733	-58.2581
54.2	-63.6597	-58.4412
54.25	-63.6597	-58.5022
54.3	-63.6902	-58.4106
54.35	-63.5071	-58.4106
54.4	-63.7512	-58.3496
54.45	-63.7207	-58.3191
54.5	-63.4766	-58.5937
54.55	-63.7207	-58.5022
54.6	-63.5071	-58.4106
54.65	-63.7817	-58.3496
54.7	-63.6597	-58.3801
54.75	-63.5681	-58.3801
54.8	-63.6902	-58.5327
54.85	-63.5681	-58.5327
54.9	-63.8428	-58.4717
54.95	-63.7207	-58.4412
55	-63.5376	-58.197
55.05	-63.7512	-58.136
55.1	-63.5376	-58.4106
55.15	-63.6291	-58.4412
55.2	-63.5986	-58.3191
55.25	-63.385	-58.3801
55.3	-63.7512	-58.2275
55.35	-63.5986	-58.136
55.4	-63.324	-58.1055
55.45	-63.6597	-58.2275
55.5	-63.5681	-58.3496
55.55	-63.324	-58.4106
55.6	-63.6597	-58.2581
55.65	-63.5071	-58.2581
55.7	-63.2935	-58.197
55.75	-63.6291	-58.1665
55.8	-63.446	-58.3191
55.85	-63.1409	-58.3801
55.9	-63.6597	-58.2886
55.95	-63.4766	-58.2886
56	-63.324	-58.1665
56.05	-63.5071	-58.3191
56.1	-63.5071	-58.2886
56.15	-63.4155	-58.197
56.2	-63.2324	-58.136
56.25	-63.4766	-58.2886
56.3	-63.446	-58.1665
56.35	-63.2629	-58.1055
56.4	-63.4766	-58.2886
56.45	-63.385	-58.1055
56.5	-63.385	-58.136
56.55	-63.385	-58.197
56.6	-63.4766	-57.9834
56.65	-63.324	-58.2581
56.7	-63.1714	-58.0444
56.75	-63.5071	-58.2275
56.8	-63.3545	-58.197
56.85	-63.2324	-57.9834
56.9	-63.324	-58.2275
56.95	-63.4766	-58.0444
57	-63.324	-58.2275
57.05	-63.1103	-58.197
57.1	-63.446	-57.9529
57.15	-63.446	-58.136
57.2	-63.3545	-58.0139
57.25	-63.2324	-58.197
57.3	-63.5071	-58.1665
57.35	-63.4155	-57.8308
57.4	-63.324	-58.136
57.45	-63.2629	-57.9834
57.5	-63.4766	-58.0139
57.55	-63.446	-58.0139
57.6	-63.1714	-57.9529
57.65	-63.324	-58.0749
57.7	-63.4155	-58.1055
57.75	-63.324	-57.9529
57.8	-63.1103	-58.0749
57.85	-63.324	-58.136
57.9	-63.4155	-57.9224
57.95	-63.3545	-58.0444
58	-63.2019	-58.0749
58.05	-63.324	-58.0444
58.1	-63.446	-57.9834
58.15	-63.2935	-58.0444
58.2	-63.2324	-58.0749
58.25	-63.385	-57.8613
58.3	-63.4155	-58.2275
58.35	-63.324	-58.0444
58.4	-63.324	-57.7698
58.45	-63.2629	-58.1665
58.5	-63.385	-58.0444
58.55	-63.2324	-57.8003
58.6	-63.2629	-58.0139
58.65	-63.0493	-57.9529
58.7	-63.385	-57.8613
58.75	-63.2935	-57.8613
58.8	-63.2629	-58.0749
58.85	-63.1714	-57.9834
58.9	-63.2019	-57.7698
58.95	-63.385	-58.0444
59	-63.324	-57.9224
59.05	-63.2629	-57.8918
59.1	-63.0798	-57.9224
59.15	-63.2019	-58.1055
59.2	-63.2935	-57.8918
59.25	-63.324	-57.6477
59.3	-63.2935	-58.0749
59.35	-63.1103	-58.0139
59.4	-63.2629	-57.8003
59.45	-63.4155	-57.7393
59.5	-63.324	-58.0139
59.55	-63.2324	-57.9224
59.6	-63.0493	-57.7698
59.65	-63.2935	-57.8003
59.7	-63.446	-58.0139
59.75	-63.2629	-57.8918
59.8	-63.2324	-57.6782
59.85	-63.1103	-57.8308
59.9	-63.2629	-57.8918
59.95	-63.385	-57.8613
60	-63.2629	-57.5867
60.05	-63.2935	-57.8918
60.1	-63.2324	-57.8613
60.15	-63.0493	-57.8918
60.2	-63.324	-57.6477
60.25	-63.2935	-57.9529
60.3	-63.324	-57.8918
60.35	-63.324	-57.8613
60.4	-63.1409	-57.6477
60.45	-63.1714	-57.8308
60.5	-63.385	-57.8918
60.55	-63.385	-57.9529
60.6	-63.324	-57.7087
60.65	-63.324	-57.8003
60.7	-63.2324	-57.8613
60.75	-63.1409	-57.8918
60.8	-63.2935	-57.6782
60.85	-63.2935	-57.7393
60.9	-63.324	-57.9224
60.95	-63.2324	-57.8003
61	-63.2324	-57.7393
61.05	-62.9578	-57.5867
61.1	-63.1409	-57.8613
61.15	-63.324	-57.8308
61.2	-63.385	-57.8003
61.25	-63.2629	-57.6782
61.3	-63.2629	-57.5867
61.35	-63.2935	-57.8613
61.4	-63.0798	-57.7698
61.45	-63.1409	-57.8003
61.5	-63.385	-57.5256
61.55	-63.446	-57.7698
61.6	-63.3545	-57.8918
61.65	-63.2935	-57.7698
61.7	-63.324	-57.6782
61.75	-63.1714	-57.4646
61.8	-63.2019	-57.7393
61.85	-63.2629	-57.8308
61.9	-63.4155	-57.7087
61.95	-63.385	-57.6782
62	-63.3545	-57.4951
62.05	-63.2629	-57.5867
62.1	-63.1409	-57.7393
62.15	-63.4155	-57.6172
62.2	-63.324	-57.5867
62.25	-63.2324	-57.5256
62.3	-63.1409	-57.4951
62.35	-63.446	-57.6477
62.4	-63.3545	-57.6172
62.45	-62.9883	-57.6782
62.5	-63.385	-57.5561
62.55	-63.3545	-57.4341
62.6	-63.1714	-57.5561
62.65	-63.4155	-57.7087
62.7	-63.2629	-57.7087
62.75	-63.3545	-57.5561
62.8	-63.4155	-57.4646
62.85	-63.1103	-57.373
62.9	-63.4766	-57.4951
62.95	-63.324	-57.6477
63	-63.4155	-57.5561
63.05	-63.4155	-57.5256
63.1	-63.1409	-57.4341
63.15	-63.446	-57.373
63.2	-63.2324	-57.373
63.25	-63.3545	-57.5867
63.3	-63.324	-57.5867
63.35	-63.0188	-57.4341
63.4	-63.4155	-57.4951
63.45	-63.4155	-57.312
63.5	-63.2324	-57.312
63.55	-63.446	-57.4341
63.6	-63.2019	-57.6477
63.65	-63.5071	-57.5867
63.7	-63.3545	-57.5867
63.75	-63.0798	-57.5867
63.8	-63.4155	-57.4951
63.85	-63.4155	-57.3425
63.9	-63.2324	-57.4341
63.95	-63.4766	-57.6782
64	-63.3545	-57.6477
64.05	-63.2629	-57.5561
64.1	-63.446	-57.5867
64.15	-63.3545	-57.4646
64.2	-63.1409	-57.251
64.25	-63.4155	-57.5256
64.3	-63.2935	-57.5867
64.35	-63.2629	-57.5561
64.4	-63.0798	-57.2815
64.45	-63.4766	-57.5256
64.5	-63.385	-57.4951
64.55	-63.1409	-57.5867
64.6	-63.4766	-57.4646
64.65	-63.2935	-57.6477
64.7	-63.2629	-57.4951
64.75	-63.4155	-57.5561
64.8	-63.446	-57.6172
64.85	-63.324	-57.4341
64.9	-63.2935	-57.7087
64.95	-63.6291	-57.6477
65	-63.385	-57.4951
65.05	-63.4155	-57.5867
65.1	-63.5681	-57.4646
65.15	-63.5071	-57.7393
65.2	-63.3545	-57.6477
65.25	-63.2935	-57.5561
65.3	-63.6291	-57.5867
65.35	-63.5681	-57.312
65.4	-63.3545	-57.6782
65.45	-63.446	-57.5867
65.5	-63.6291	-57.5561
65.55	-63.5681	-57.5867
65.6	-63.2324	-57.4036
65.65	-63.6597	-57.6782
65.7	-63.5376	-57.5867
65.75	-63.5071	-57.4036
65.8	-63.2629	-57.7698
65.85	-63.7512	-57.6172
65.9	-63.5681	-57.5256
65.95	-63.5681	-57.7087
66	-63.4155	-57.6172
66.05	-63.7207	-57.6477
66.1	-63.5681	-57.6477
66.15	-63.5681	-57.6172
66.2	-63.5376	-57.5561
66.25	-63.7207	-57.7087
66.3	-63.6597	-57.5256
66.35	-63.5986	-57.5867
66.4	-63.5681	-57.7087
66.45	-63.7512	-57.6172
66.5	-63.6902	-57.5867
66.55	-63.6597	-57.7393
66.6	-63.4155	-57.6477
66.65	-63.8428	-57.4951
66.7	-63.6597	-57.7698
66.75	-63.6902	-57.6782
66.8	-63.4766	-57.4341
66.85	-63.6902	-57.7698
66.9	-63.7817	-57.6782
66.95	-63.6902	-57.5256
67	-63.6902	-57.5561
67.05	-63.5986	-57.8308
67.1	-63.7512	-57.8003
67.15	-63.7207	-57.312
67.2	-63.7817	-57.7087
67.25	-63.6597	-57.5561
67.3	-63.6902	-57.5256
67.35	-63.7817	-57.5256
67.4	-63.8123	-57.6477
67.45	-63.6291	-57.6172
67.5	-63.5071	-57.312
67.55	-63.7817	-57.6477
67.6	-63.7512	-57.6172
67.65	-63.6902	-57.4951
67.7	-63.5681	-57.4646
67.75	-63.4766	-57.6782
67.8	-63.8123	-57.6172
67.85	-63.7207	-57.3425
67.9	-63.6902	-57.6477
67.95	-63.5681	-57.5867
68	-63.4766	-57.5256
68.05	-63.8123	-57.4036
68.1	-63.7817	-57.6172
68.15	-63.6902	-57.6477
68.2	-63.6291	-57.5256
68.25	-63.6597	-57.2815
68.3	-63.8733	-57.6172
68.35	-63.8428	-57.6477
68.4	-63.8123	-57.4951
68.45	-63.7512	-57.312
68.5	-63.7207	-57.6477
68.55	-63.6597	-57.5561
68.6	-63.8428	-57.4951
68.65	-63.8123	-57.312
68.7	-63.7817	-57.5867
68.75	-63.7512	-57.4951
68.8	-63.5681	-57.5256
68.85	-63.6902	-57.251
68.9	-63.9343	-57.5256
68.95	-63.9038	-57.5867
69	-63.9038	-57.5867
69.05	-63.7817	-57.312
69.1	-63.7817	-57.5256
69.15	-63.7817	-57.7698
69.2	-63.9954	-57.6782
69.25	-64.0259	-57.4341
69.3	-63.9954	-57.4341
69.35	-64.0259	-57.7087
69.4	-63.8733	-57.6477
69.45	-63.8428	-57.5867
69.5	-63.9648	-57.3425
69.55	-64.0564	-57.5561
69.6	-63.9954	-57.6782
69.65	-63.9038	-57.5256
69.7	-63.9954	-57.4646
69.75	-63.8733	-57.312
69.8	-63.6902	-57.6477
69.85	-63.8123	-57.7087
69.9	-64.0259	-57.6477
69.95	-64.0259	-57.5256
70	-63.9343	-57.5561
70.05	-63.9343	-57.7393
70.1	-63.9038	-57.7393
70.15	-63.9648	-57.6782
70.2	-63.7817	-57.6782
70.25	-63.9648	-57.6477
70.3	-64.0869	-57.8003
70.35	-64.1174	-57.8003
70.4	-64.0259	-57.8613
70.45	-63.8123	-57.7087
70.5	-63.9648	-57.4646
70.55	-64.1785	-57.8003
70.6	-64.0869	-57.9224
70.65	-63.7512	-57.8003
70.7	-64.0564	-57.7698
70.75	-64.0564	-57.5867
70.8	-63.9343	-57.7087
70.85	-64.1479	-57.8003
70.9	-64.0564	-57.8308
70.95	-63.8123	-57.7087
71	-64.0869	-57.6782
71.05	-64.0259	-57.5561
71.1	-63.9954	-57.7087
71.15	-63.9954	-57.8918
71.2	-63.8123	-57.8003
71.25	-64.1174	-57.8003
71.3	-63.9954	-57.8003
71.35	-63.9038	-57.6477
71.4	-64.0869	-57.6782
71.45	-63.8428	-57.9529
71.5	-64.1174	-57.9529
71.55	-63.9648	-57.8003
71.6	-64.0259	-57.8308
71.65	-63.9954	-57.7087
71.7	-63.6902	-57.6172
71.75	-64.0869	-57.7698
71.8	-63.9343	-57.9224
71.85	-63.9954	-57.9224
71.9	-63.9343	-57.8308
71.95	-63.7512	-57.8308
72	-63.9954	-57.6172
72.05	-63.9038	-57.5561
72.1	-63.6902	-57.7087
72.15	-63.9954	-57.8918
72.2	-63.9038	-57.8918
72.25	-63.6597	-57.8003
72.3	-63.9343	-57.8613
72.35	-63.9038	-57.7698
72.4	-63.5986	-57.6477
72.45	-63.9954	-57.6477
72.5	-63.8733	-57.9529
72.55	-63.6597	-57.8918
72.6	-63.9038	-57.7698
72.65	-63.9343	-57.7698
72.7	-63.7207	-57.7393
72.75	-63.8733	-57.9834
72.8	-63.9648	-57.8308
72.85	-63.8428	-57.6477
72.9	-63.7512	-57.8918
72.95	-63.8428	-57.8308
73	-63.8733	-57.5561
73.05	-63.6291	-57.8308
73.1	-63.9038	-57.8003
73.15	-63.8428	-57.5256
73.2	-63.5681	-57.8918
73.25	-63.7817	-57.7393
73.3	-63.8123	-57.7393
73.35	-63.7207	-57.8308
73.4	-63.6291	-57.6172
73.45	-63.8123	-57.8918
73.5	-63.8733	-57.7393
73.55	-63.5681	-57.8918
73.6	-63.8733	-57.8613
73.65	-63.7817	-57.5561
73.7	-63.8123	-57.8918
73.75	-63.6291	-57.8003
73.8	-63.8428	-57.9529
73.85	-63.8123	-57.8308
73.9	-63.6597	-57.6172
73.95	-63.8428	-57.9834
74	-63.8733	-57.8308
74.05	-63.7817	-57.7393
74.1	-63.5376	-57.8308
74.15	-63.8733	-57.8003
74.2	-63.8123	-57.8308
74.25	-63.7207	-57.9529
74.3	-63.5681	-57.7087
74.35	-63.8733	-57.8613
74.4	-63.7817	-57.8918
74.45	-63.6902	-57.6782
74.5	-63.6902	-57.9834
74.55	-63.9648	-57.9529
74.6	-63.8733	-57.8918
74.65	-63.7207	-58.0139
74.7	-63.7207	-57.9834
74.75	-64.0869	-57.8308
74.8	-63.9343	-57.9529
74.85	-63.7207	-58.1665
74.9	-63.7817	-57.9224
74.95	-64.0259	-57.8308
75	-63.9038	-58.1055
75.05	-63.7817	-58.0139
75.1	-63.7207	-57.8308
75.15	-64.0564	-58.1055
75.2	-63.9648	-58.136
75.25	-63.8733	-57.8918
75.3	-63.6291	-58.0444
75.35	-63.9343	-58.0749
75.4	-63.9343	-57.9529
75.45	-63.9038	-57.8003
75.5	-63.5986	-58.136
75.55	-63.8428	-58.0444
75.6	-64.0564	-57.8003
75.65	-63.9648	-58.1055
75.7	-63.8123	-58.1055
75.75	-63.7207	-58.0749
75.8	-64.0564	-57.8918
75.85	-64.1174	-58.2581
75.9	-63.9648	-58.1665
75.95	-63.9648	-58.0139
76	-63.8733	-58.0749
76.05	-64.1479	-58.2275
76.1	-64.0259	-58.197
76.15	-63.9648	-57.9224
76.2	-63.8428	-58.1665
76.25	-63.9648	-58.2886
76.3	-64.1174	-58.1665
76.35	-64.0564	-57.9834
76.4	-64.0564	-58.2275
76.45	-63.9038	-58.197
76.5	-63.8733	-58.1665
76.55	-64.1174	-58.0749
76.6	-64.1174	-58.3496
76.65	-64.0564	-58.2275
76.7	-63.9648	-58.197
76.75	-63.9038	-58.0444
76.8	-64.1174	-58.3191
76.85	-64.1785	-58.3191
76.9	-64.0564	-58.2275
76.95	-63.9954	-58.136
77	-63.8733	-58.3191
77.05	-64.1174	-58.2886
77.1	-64.2395	-58.3191
77.15	-64.0869	-58.0444
77.2	-64.1785	-58.3496
77.25	-64.0259	-58.3191
77.3	-63.9038	-58.3496
77.35	-64.1479	-58.1665
77.4	-64.1785	-58.3191
77.45	-64.2395	-58.3496
77.5	-64.1785	-58.2886
77.55	-64.0869	-58.136
77.6	-63.8733	-58.197
77.65	-64.0869	-58.2581
77.7	-64.1785	-58.2581
77.75	-64.1785	-58.2275
77.8	-64.0869	-58.0444
77.85	-64.0869	-58.2275
77.9	-64.0564	-58.2581
77.95	-63.9343	-58.2581
78	-64.1174	-58.136
78.05	-64.1785	-58.0444
78.1	-64.209	-58.2581
78.15	-64.1785	-58.3191
78.2	-64.1174	-58.3191
78.25	-64.0259	-58.1665
78.3	-64.0564	-57.9529
78.35	-64.209	-58.2275
78.4	-64.209	-58.3191
78.45	-64.2395	-58.197
78.5	-64.209	-58.136
78.55	-64.1785	-58.0139
78.6	-63.9343	-58.197
78.65	-63.9343	-58.2886
78.7	-64.1785	-58.1055
78.75	-64.1479	-58.0139
78.8	-64.0869	-57.9834
78.85	-63.8428	-57.9834
78.9	-64.0259	-58.197
78.95	-64.1479	-58.1055
79	-64.0564	-58.0749
79.05	-63.9038	-57.9529
79.1	-64.1479	-57.8613
79.15	-64.1479	-58.0139
79.2	-63.8123	-58.2275
79.25	-64.1785	-58.1055
79.3	-64.0564	-58.0444
79.35	-64.0869	-57.9529
79.4	-64.1174	-57.9224
79.45	-63.8733	-58.1055
79.5	-64.2395	-58.136
79.55	-64.1174	-58.0139
79.6	-64.0564	-58.0749
79.65	-64.1174	-57.9529
79.7	-63.8123	-57.7393
79.75	-64.209	-57.9834
79.8	-64.0259	-58.197
79.85	-64.0869	-58.0749
79.9	-64.0259	-58.0749
79.95	-63.8123	-58.0749
80	-64.0869	-57.8613
80.05	-63.9954	-57.9529
80.1	-63.9648	-58.136
80.15	-63.9343	-58.136
80.2	-63.9038	-58.136
80.25	-64.1174	-58.136
80.3	-64.0869	-58.1055
80.35	-63.7512	-57.8918
80.4	-64.2395	-57.8003
80.45	-64.0564	-58.0444
80.5	-63.8733	-58.2581
80.55	-64.1174	-58.1055
80.6	-64.0259	-58.0749
80.65	-63.9038	-58.136
80.7	-64.209	-58.0139
80.75	-64.0869	-57.8918
80.8	-63.8123	-57.8918
80.85	-64.3005	-58.136
80.9	-64.0869	-58.136
80.95	-63.8123	-58.0444
81	-64.209	-57.7698
81.05	-64.0869	-57.9224
81.1	-63.8733	-58.1055
81.15	-64.0869	-58.0139
81.2	-64.0259	-57.7698
81.25	-64.0564	-58.1055
81.3	-63.9954	-58.136
81.35	-64.2395	-57.8003
81.4	-64.0869	-58.1665
81.45	-63.9954	-58.0444
81.5	-64.3005	-57.9834
81.55	-64.1479	-58.1055
81.6	-63.9954	-57.9224
81.65	-64.27	-58.1055
81.7	-64.3005	-58.136
81.75	-64.0564	-57.8613
81.8	-63.9648	-57.9529
81.85	-64.2395	-57.7393
81.9	-64.2395	-58.1055
81.95	-63.9038	-58.0444
82	-64.0869	-57.9529
82.05	-64.209	-57.9834
82.1	-64.1174	-57.8003
82.15	-63.9648	-58.1055
82.2	-64.3005	-57.9529
82.25	-64.1785	-57.8308
82.3	-64.0869	-58.0444
82.35	-64.1479	-57.9834
82.4	-64.331	-57.9834
82.45	-64.2395	-58.0139
82.5	-64.0564	-57.8308
82.55	-64.27	-58.1665
82.6	-64.2395	-58.0749
82.65	-64.209	-57.8003
82.7	-63.9648	-58.1665
82.75	-64.331	-58.0139
82.8	-64.1479	-57.8613
82.85	-64.1479	-58.1665
82.9	-63.9343	-57.9834
82.95	-64.209	-57.7698
83	-64.1174	-58.0139
83.05	-64.0259	-57.9834
83.1	-63.8428	-57.7393
83.15	-64.209	-57.9529
83.2	-64.1479	-57.9529
83.25	-64.0259	-57.9224
83.3	-63.8428	-57.8308
83.35	-64.1785	-57.9834
83.4	-64.1174	-58.0139
83.45	-64.0259	-57.7087
83.5	-63.8428	-58.0139
83.55	-64.1479	-57.9529
83.6	-64.27	-57.8918
83.65	-64.1785	-57.9529
83.7	-63.9648	-57.9529
83.75	-64.0869	-57.8918
83.8	-64.27	-57.7698
83.85	-64.0259	-58.136
83.9	-64.1174	-57.8918
83.95	-63.9648	-57.7087
84	-64.2395	-57.9834
84.05	-64.1785	-57.9529
84.1	-64.1174	-57.8613
84.15	-63.9954	-57.6477
84.2	-63.9648	-57.9834
84.25	-64.1785	-57.8613
84.3	-64.0564	-57.8003
84.35	-63.9954	-57.7698
84.4	-63.8733	-57.9834
84.45	-63.9648	-57.9529
84.5	-64.1785	-57.7087
84.55	-63.9954	-57.8613
84.6	-64.0869	-57.9834
84.65	-63.8733	-57.9224
84.7	-63.9954	-57.6782
84.75	-64.1785	-57.8613
84.8	-64.1174	-57.8613
84.85	-64.0869	-57.8613
84.9	-63.9343	-57.6172
84.95	-63.9343	-57.9224
85	-64.2395	-57.8613
85.05	-64.1479	-57.7698
85.1	-64.0564	-57.6172
85.15	-64.0259	-57.8613
85.2	-63.9648	-57.8613
85.25	-64.1479	-57.8613
85.3	-64.209	-57.5561
85.35	-64.0564	-57.8308
85.4	-64.1174	-57.8613
85.45	-64.0869	-57.7393
85.5	-63.9954	-57.6782
85.55	-64.2395	-57.7393
85.6	-64.209	-57.8613
85.65	-64.1174	-57.7698
85.7	-64.0564	-57.7393
85.75	-64.0259	-57.6477
85.8	-64.0259	-57.8308
85.85	-64.331	-57.7393
85.9	-64.2395	-57.7393
85.95	-64.1174	-57.6172
86	-64.0869	-57.7087
86.05	-63.9954	-57.8308
86.1	-63.9648	-57.8003
86.15	-64.1479	-57.6477
86.2	-64.2395	-57.5561
86.25	-64.1785	-57.7698
86.3	-64.209	-57.8003
86.35	-64.0259	-57.7087
86.4	-63.8428	-57.5867
86.45	-63.9343	-57.5561
86.5	-64.0869	-57.7698
86.55	-64.1785	-57.6477
86.6	-64.0564	-57.6782
86.65	-63.9648	-57.4951
86.7	-64.0259	-57.6172
86.75	-63.9648	-57.8918
86.8	-63.8733	-57.7393
86.85	-63.9954	-57.7393
86.9	-64.3005	-57.6172
86.95	-64.1174	-57.5867
87	-64.1785	-57.8308
87.05	-63.9648	-57.6782
87.1	-63.9343	-57.7087
87.15	-64.2395	-57.6172
87.2	-64.1479	-57.373
87.25	-64.0564	-57.6477
87.3	-63.9954	-57.6782
87.35	-64.2395	-57.5867
87.4	-64.1174	-57.5561
87.45	-63.8428	-57.4951
87.5	-64.2395	-57.312
87.55	-64.0564	-57.4951
87.6	-63.8733	-57.6477
87.65	-64.0564	-57.4951
87.7	-63.9343	-57.4036
87.75	-64.1174	-57.3425
87.8	-64.1174	-57.312
87.85	-63.8733	-57.5256
87.9	-64.1785	-57.5561
87.95	-64.0259	-57.4341
88	-64.1479	-57.5256
88.05	-64.1174	-57.3425
88.1	-63.9038	-57.1594
88.15	-64.209	-57.373
88.2	-63.9648	-57.5867
88.25	-64.1174	-57.4951
88.3	-64.0869	-57.4646
88.35	-64.0564	-57.373
88.4	-64.209	-57.2815
88.45	-63.9038	-57.1899
88.5	-64.209	-57.3425
88.55	-64.1174	-57.4646
88.6	-63.8123	-57.4951
88.65	-64.1785	-57.312
88.7	-64.0259	-57.373
88.75	-63.9038	-57.2205
88.8	-64.1174	-57.1289
88.85	-63.9648	-57.312
88.9	-63.9648	-57.4646
88.95	-64.0259	-57.5561
89	-64.0564	-57.373
89.05	-63.9343	-57.4646
89.1	-64.1174	-57.3425
89.15	-63.9648	-57.2815
89.2	-64.0869	-57.251
89.25	-64.209	-57.5561
89.3	-63.9648	-57.5561
89.35	-63.9038	-57.4646
89.4	-64.1479	-57.2205
89.45	-64.1479	-57.4951
89.5	-63.8123	-57.4951
89.55	-64.209	-57.3425
89.6	-64.1785	-57.3425
89.65	-63.7817	-57.5867
89.7	-64.1479	-57.3425
89.75	-64.0259	-57.4646
89.8	-63.9038	-57.373
89.85	-63.9954	-57.251
89.9	-64.0869	-57.5256
89.95	-63.9343	-57.4646
90	-63.7817	-57.2815
90.05	-64.1174	-57.4341
90.1	-64.0564	-57.2205
90.15	-63.8123	-57.4951
90.2	-63.9954	-57.4341
90.25	-64.1174	-57.2815
90.3	-63.9648	-57.4341
90.35	-63.8123	-57.1594
90.4	-64.1479	-57.5256
90.45	-64.0259	-57.4036
90.5	-63.7817	-57.373
90.55	-64.0259	-57.4036
90.6	-63.9343	-57.0984
90.65	-63.9343	-57.4646
90.7	-63.8428	-57.4341
90.75	-64.0564	-57.1899
90.8	-63.9038	-57.4646
90.85	-63.8428	-57.312
90.9	-63.9038	-57.0984
90.95	-64.0869	-57.4341
91	-63.9038	-57.3425
91.05	-63.6291	-57.1289
91.1	-63.8733	-57.373
91.15	-63.9648	-57.2815
91.2	-63.8733	-57.0374
91.25	-63.6291	-57.3425
91.3	-63.9648	-57.251
91.35	-63.9038	-57.1594
91.4	-63.8428	-57.4341
91.45	-63.6291	-57.3425
91.5	-64.0564	-57.0984
91.55	-63.8123	-57.4341
91.6	-63.7207	-57.373
91.65	-63.5376	-57.251
91.7	-64.0259	-57.2815
91.75	-63.9954	-57.5256
91.8	-63.7817	-57.373
91.85	-63.5681	-57.1289
91.9	-63.9648	-57.5256
91.95	-63.9038	-57.4036
92	-63.8428	-57.2205
92.05	-63.5376	-57.3425
92.1	-63.7817	-57.312
92.15	-63.9038	-57.2815
92.2	-63.8123	-57.1899
92.25	-63.7512	-57.4646
92.3	-63.6902	-57.4646
92.35	-63.9648	-57.0679
92.4	-63.9038	-57.4646
92.45	-63.7817	-57.373
92.5	-63.6902	-57.312
92.55	-63.8428	-57.1289
92.6	-64.0259	-57.4036
92.65	-63.9038	-57.2815
92.7	-63.8428	-57.2205
92.75	-63.6902	-57.1594
92.8	-63.9648	-57.4036
92.85	-63.9038	-57.373
92.9	-63.8428	-57.2205
92.95	-63.8123	-57.312
93	-63.6597	-57.4036
93.05	-63.8733	-57.251
93.1	-63.9038	-57.1289
93.15	-63.9038	-57.251
93.2	-63.6902	-57.312
93.25	-63.6291	-57.2205
93.3	-63.8733	-57.0374
93.35	-63.8733	-57.2205
93.4	-63.8428	-57.312
93.45	-63.7207	-57.312
93.5	-63.5376	-57.0984
93.55	-63.8123	-57.251
93.6	-63.9038	-57.3425
93.65	-63.7817	-57.4036
93.7	-63.8123	-57.1594
93.75	-63.5986	-57.1594
93.8	-63.7512	-57.4036
93.85	-63.9038	-57.373
93.9	-63.8123	-57.2815
93.95	-63.8733	-57.0374
94	-63.7207	-57.373
94.05	-63.6597	-57.3425
94.1	-63.7512	-57.2205
94.15	-63.8733	-57.0068
94.2	-63.8123	-57.2205
94.25	-63.8428	-57.4036
94.3	-63.7207	-57.2205
94.35	-63.446	-57.1594
94.4	-63.6291	-56.9153
94.45	-63.9038	-57.312
94.5	-63.8733	-57.2205
94.55	-63.8428	-57.2815
94.6	-63.6902	-57.0068
94.65	-63.7817	-57.0374
94.7	-63.6291	-57.251
94.75	-63.7512	-57.1289
94.8	-63.9648	-57.1289
94.85	-63.8733	-56.9153
94.9	-63.8733	-57.0984
94.95	-63.7817	-57.2815
95	-63.6597	-57.0068
95.05	-63.6597	-57.1594
95.1	-63.8428	-56.9763
95.15	-63.9038	-57.0068
95.2	-63.7512	-57.1594
95.25	-63.7512	-57.1289
95.3	-63.6597	-57.0984
95.35	-63.4766	-56.9763
95.4	-63.6902	-56.9153
95.45	-63.8123	-57.1594
95.5	-63.7207	-57.1289
95.55	-63.5986	-57.1289
95.6	-63.5681	-57.0984
95.65	-63.7817	-56.8542
95.7	-63.8123	-56.9763
95.75	-63.5071	-57.251
95.8	-63.8123	-57.1289
95.85	-63.6902	-57.1594
95.9	-63.6291	-57.0374
95.95	-63.8733	-56.9458
96	-63.6291	-57.1289
96.05	-63.8428	-57.251
96.1	-63.8428	-57.1594
96.15	-63.5376	-57.1289
96.2	-63.8733	-57.1594
96.25	-63.6597	-56.9458
96.3	-63.7817	-56.8848
96.35	-63.7817	-57.2205
96.4	-63.4766	-57.1594
96.45	-63.7817	-57.0984
96.5	-63.6291	-57.0374
96.55	-63.7207	-57.0068
96.6	-63.7512	-56.7932
96.65	-63.446	-56.9763
96.7	-63.6902	-57.1594
96.75	-63.6291	-57.1899
96.8	-63.8123	-57.1899
96.85	-63.6597	-57.0679
96.9	-63.385	-56.9763
96.95	-63.8733	-56.8542
97	-63.6902	-57.0068
97.05	-63.5681	-57.1594
97.1	-63.8428	-57.1899
97.15	-63.6291	-57.1289
97.2	-63.6597	-57.0679
97.25	-63.7512	-57.1899
97.3	-63.6597	-57.0374
97.35	-63.7207	-56.8848
97.4	-63.8123	-57.0679
97.45	-63.5986	-57.1899
97.5	-63.5681	-57.2205
97.55	-63.7817	-57.1594
97.6	-63.5986	-57.0984
97.65	-63.6597	-56.9763
97.7	-63.7817	-57.3425
97.75	-63.6902	-57.2205
97.8	-63.5376	-57.0984
97.85	-63.7817	-57.1594
97.9	-63.7512	-57.3425
97.95	-63.4155	-57.251
98	-63.9038	-57.0679
98.05	-63.8123	-57.4646
98.1	-63.5376	-57.2815
98.15	-63.7512	-57.1899
98.2	-63.8428	-57.2815
98.25	-63.7207	-57.0679
98.3	-63.5681	-57.4036
98.35	-63.9038	-57.2815
98.4	-63.7512	-57.2205
98.45	-63.4766	-57.312
98.5	-63.7817	-57.0679
98.55	-63.6291	-57.373
98.6	-63.6291	-57.251
98.65	-63.6597	-57.2815
98.7	-63.7817	-57.3425
98.75	-63.6597	-57.0679
98.8	-63.4766	-57.4341
98.85	-63.7207	-57.2815
98.9	-63.6597	-57.1594
98.95	-63.6291	-57.3425
99	-63.5376	-57.1899
99.05	-63.7817	-57.2815
99.1	-63.7207	-57.4036
99.15	-63.4766	-57.0374
99.2	-63.6597	-57.4646
99.25	-63.8428	-57.3425
99.3	-63.7207	-57.0679
99.35	-63.5071	-57.5256
99.4	-63.7817	-57.4036
99.45	-63.7207	-57.0984
99.5	-63.6597	-57.4951
99.55	-63.385	-57.4036
99.6	-63.6597	-57.0374
99.65	-63.6902	-57.4646
99.7	-63.5681	-57.373
99.75	-63.5071	-57.1289
99.8	-63.6597	-57.4951
[truncated: 204,453+ more rows]

## Sheet: Figure 2iJ
1	0	0.97	0.94	0.98	0	0.15	0.1	0	0.87	0	0	0.71	0.72			1	0.54	0.84	0.92			VS changes				1	0	0	0.14	0.98	0.94	0.1	0.15	0.12	0	0	0.1		1	0.88	0.97	0.71	0.95
5	0.96	0.96	0.96	0.97	0.99	0.99	0.89	0.96	0.98	0.94	0.91	0.89	0.82			5	0.48	0.61	0.55			I left, j right				5	0.91	0.94	0.94	0.99	0.997	0.96	0.995	0.96	0.948	0.75	0.9		5	0.71	0.69	0.46	0.81
