# Supplementary material for: Intrinsic mechanical sensitivity of mammalian auditory neurons as a contributor to sound-driven neural activity
Source: eLife. 2022 Mar 10;11:e74948. doi: 10.7554/eLife.74948 (PMC8942473; doi:10.7554/eLife.74948)
Supplement: Figure 3—figure supplement 1—source data 1. [file elife-74948-fig3-figsupp1-data1.xls]

## Sheet: Fig. 3 suppl 1a-d
t(ms)	0.25 nA at 0.7 um														Figure 3- figure supplement 1
	zero deg	45 deg	90 deg	135 deg	180 deg	225 deg	270 deg								Combined displacement and current injection yield more than two action potentials per cycle in chinchilla SGNs.
0	-66.4936	-65.9322	-67.4469	-67.6669	-67.7953	-66.9878	-67.1639	0	0
0.05	-66.6193	-65.8053	-67.4753	-67.7451	-67.7499	-66.8247	-67.1299	2500	0
0.1	-66.7116	-65.7511	-67.5116	-67.7933	-67.7955	-66.6907	-67.1486
0.15	-66.7858	-65.7763	-67.588	-67.7614	-67.8466	-66.5987	-67.1731
0.2	-66.8344	-65.816	-67.7138	-67.6544	-67.8406	-66.5765	-67.1461
0.25	-66.7863	-65.8037	-67.8179	-67.5414	-67.8227	-66.6179	-67.0409
0.3	-66.6292	-65.7279	-67.8347	-67.4759	-67.8327	-66.6753	-66.9038
0.35	-66.5136	-65.6733	-67.8267	-67.4978	-67.8663	-66.7567	-66.8786
0.4	-66.552	-65.6615	-67.8181	-67.5467	-67.8604	-66.8531	-66.9895
0.45	-66.6966	-65.6524	-67.7469	-67.5529	-67.8142	-66.9363	-67.1589
0.5	-66.8183	-65.6226	-67.6047	-67.4833	-67.7471	-66.97	-67.2994
0.55	-66.886	-65.584	-67.49	-67.3875	-67.6745	-66.9268	-67.3745
0.6	-66.9111	-65.5871	-67.4621	-67.3629	-67.6464	-66.8098	-67.3867
0.65	-66.9013	-65.6803	-67.4902	-67.4391	-67.6892	-66.6641	-67.3384
0.7	-66.8804	-65.8389	-67.5619	-67.5746	-67.7448	-66.5607	-67.2412
0.75	-66.8396	-65.9746	-67.6667	-67.7018	-67.7359	-66.5611	-67.1052
0.8	-66.7252	-66.034	-67.7374	-67.7719	-67.7004	-66.6462	-66.9337
0.85	-66.517	-66.0547	-67.7319	-67.7837	-67.7478	-66.7129	-66.7432
0.9	-66.3242	-66.0666	-67.7094	-67.7711	-67.8747	-66.6638	-66.6133
0.95	-66.2727	-66.0149	-67.7159	-67.758	-67.9499	-66.5331	-66.647
1	-66.3602	-65.858	-67.7011	-67.7212	-67.8769	-66.4531	-66.8313
1.05	-66.4856	-65.6725	-67.6305	-67.6658	-67.712	-66.4974	-67.037
1.1	-66.5622	-65.5508	-67.5916	-67.6285	-67.5574	-66.6388	-67.142
1.15	-66.58	-65.4749	-67.6543	-67.5987	-67.453	-66.7992	-67.085
1.2	-66.562	-65.3676	-67.7501	-67.5445	-67.418	-66.9382	-66.8801
1.25	-66.5221	-65.2467	-67.797	-67.4825	-67.4398	-67.0656	-66.6786
1.3	-66.4604	-65.2239	-67.8452	-67.471	-67.4662	-67.1656	-66.646
1.35	-66.3805	-65.3534	-67.9372	-67.4899	-67.456	-67.217	-66.7514
1.4	-66.2926	-65.5516	-67.98	-67.4753	-67.4379	-67.2186	-66.8269
1.45	-66.2157	-65.7039	-67.8968	-67.4759	-67.479	-67.2033	-66.796
1.5	-66.1697	-65.7648	-67.7579	-67.58	-67.5524	-67.2391	-66.7509
1.55	-66.1653	-65.7597	-67.6387	-67.7512	-67.593	-67.3135	-66.7701
1.6	-66.1717	-65.7357	-67.5195	-67.8498	-67.5935	-67.3389	-66.7973
1.65	-66.1677	-65.7478	-67.375	-67.8318	-67.5691	-67.2693	-66.7607
1.7	-66.1785	-65.8302	-67.2647	-67.8176	-67.5032	-67.1491	-66.6762
1.75	-66.2334	-65.9325	-67.2612	-67.8757	-67.4021	-67.0114	-66.6485
1.8	-66.3022	-65.9351	-67.3631	-67.9281	-67.3321	-66.8263	-66.7319
1.85	-66.3321	-65.8017	-67.5028	-67.9192	-67.3491	-66.623	-66.8417
1.9	-66.3132	-65.6302	-67.5993	-67.9233	-67.4231	-66.5539	-66.8676
1.95	-66.3143	-65.5447	-67.5752	-67.9783	-67.4991	-66.6925	-66.7843
2	-66.3971	-65.5792	-67.4148	-67.9806	-67.5637	-66.9039	-66.6818
2.05	-66.5139	-65.6952	-67.2042	-67.9164	-67.6053	-67.0227	-66.6616
2.1	-66.5612	-65.8353	-67.0687	-67.9086	-67.5693	-67.064	-66.7395
2.15	-66.5178	-65.945	-67.0394	-67.963	-67.4106	-67.1242	-66.8762
2.2	-66.4291	-65.9738	-67.041	-67.9491	-67.1857	-67.2175	-67.0308
2.25	-66.3342	-65.9252	-67.0114	-67.8114	-67.0206	-67.2929	-67.1505
2.3	-66.2433	-65.8554	-66.9702	-67.676	-67.0027	-67.3399	-67.1511
2.35	-66.1627	-65.8036	-66.9477	-67.6562	-67.1109	-67.3792	-66.9811
2.4	-66.1142	-65.7591	-66.9425	-67.6613	-67.26	-67.355	-66.6842
2.45	-66.1135	-65.7341	-66.9425	-67.6201	-67.3676	-67.1969	-66.3641
2.5	-66.1453	-65.7685	-66.9462	-67.631	-67.3829	-66.9778	-66.1177
2.55	-66.2002	-65.8465	-66.9974	-67.7352	-67.3597	-66.8674	-66.0242
2.6	-66.2768	-65.8921	-67.1595	-67.8351	-67.3904	-66.899	-66.1074
2.65	-66.3684	-65.8912	-67.4036	-67.8499	-67.4695	-66.9465	-66.2852
2.7	-66.4646	-65.8888	-67.5728	-67.7998	-67.5301	-66.9179	-66.4076
2.75	-66.5544	-65.8756	-67.5517	-67.735	-67.517	-66.8313	-66.4185
2.8	-66.6052	-65.8089	-67.4016	-67.6602	-67.4245	-66.7704	-66.4032
2.85	-66.5818	-65.7326	-67.2839	-67.6303	-67.2887	-66.8053	-66.4652
2.9	-66.4923	-65.7477	-67.2788	-67.7358	-67.156	-66.944	-66.5894
2.95	-66.424	-65.8736	-67.3446	-67.9132	-67.0724	-67.0931	-66.697
3	-66.4416	-66.0375	-67.4015	-68.0143	-67.0448	-67.1	-66.7827
3.05	-66.4795	-66.1891	-67.4011	-68.0046	-67.0688	-66.9219	-66.8914
3.1	-66.4323	-66.3321	-67.3015	-67.9508	-67.1445	-66.6761	-66.9866
3.15	-66.3291	-66.4404	-67.1035	-67.9239	-67.2025	-66.5463	-67.0152
3.2	-66.2783	-66.4501	-66.9196	-67.9089	-67.2064	-66.6141	-67.029
3.25	-66.2858	-66.352	-66.8772	-67.8496	-67.2374	-66.7931	-67.0942
3.3	-66.2521	-66.2374	-66.9851	-67.7938	-67.3328	-66.9469	-67.1608
3.35	-66.1665	-66.1971	-67.1786	-67.7994	-67.3924	-67.0312	-67.1638
3.4	-66.1459	-66.2299	-67.411	-67.8156	-67.325	-67.0841	-67.1339
3.45	-66.2384	-66.2696	-67.5955	-67.8145	-67.2229	-67.1203	-67.1454
3.5	-66.3608	-66.2885	-67.626	-67.8093	-67.2247	-67.1126	-67.2017
3.55	-66.4733	-66.2901	-67.4999	-67.7818	-67.3	-67.0428	-67.2341
3.6	-66.6401	-66.234	-67.3361	-67.7393	-67.3253	-66.9084	-67.2089
3.65	-66.8403	-66.0542	-67.234	-67.6939	-67.266	-66.6951	-67.1787
3.7	-66.9455	-65.7781	-67.2031	-67.6395	-67.186	-66.445	-67.2036
3.75	-66.9289	-65.5347	-67.2416	-67.5995	-67.1123	-66.3019	-67.3072
3.8	-66.8924	-65.4281	-67.3686	-67.621	-67.0637	-66.3692	-67.4355
3.85	-66.8607	-65.4807	-67.5373	-67.73	-67.1104	-66.5273	-67.4624
3.9	-66.7971	-65.6678	-67.612	-67.8824	-67.2835	-66.5599	-67.3201
3.95	-66.7595	-65.9249	-67.5377	-68.002	-67.5007	-66.4144	-67.1025
4	-66.8369	-66.1412	-67.3985	-68.0658	-67.6775	-66.215	-66.947
4.05	-66.9588	-66.2678	-67.2739	-68.1258	-67.7909	-66.0685	-66.8801
4.1	-66.9459	-66.3313	-67.1742	-68.2074	-67.8405	-66.01	-66.8354
4.15	-66.7334	-66.3385	-67.1272	-68.226	-67.8274	-66.0581	-66.7915
4.2	-66.4597	-66.2588	-67.1837	-68.1183	-67.7684	-66.1925	-66.7699
4.25	-66.3021	-66.1014	-67.2876	-67.9697	-67.7101	-66.3134	-66.7567
4.3	-66.3095	-65.9417	-67.3238	-67.8836	-67.6896	-66.3596	-66.7075
4.35	-66.4437	-65.8544	-67.2761	-67.8109	-67.6708	-66.3909	-66.6287
4.4	-66.6481	-65.8815	-67.2269	-67.6729	-67.5879	-66.4652	-66.6018
4.45	-66.8518	-66.0252	-67.2268	-67.5325	-67.4843	-66.5266	-66.7041
4.5	-66.967	-66.22	-67.2836	-67.5108	-67.451	-66.523	-66.9046
4.55	-66.9608	-66.3342	-67.4397	-67.6087	-67.4561	-66.4908	-67.084
4.6	-66.8738	-66.2992	-67.6879	-67.7404	-67.3948	-66.478	-67.1555
4.65	-66.7574	-66.1604	-67.8808	-67.8374	-67.2957	-66.4823	-67.1263
4.7	-66.6518	-65.9868	-67.8505	-67.8627	-67.2637	-66.5042	-67.0628
4.75	-66.6159	-65.8466	-67.6453	-67.8098	-67.2878	-66.5496	-67.0299
4.8	-66.7016	-65.816	-67.5144	-67.708	-67.2865	-66.5918	-67.0537
4.85	-66.8573	-65.9215	-67.5865	-67.6418	-67.2865	-66.6111	-67.089
4.9	-66.9769	-66.0604	-67.7475	-67.6813	-67.3691	-66.631	-67.084
4.95	-67.027	-66.0799	-67.8562	-67.8088	-67.5165	-66.6894	-67.0618
5	-67.0182	-65.9471	-67.9039	-67.9276	-67.6307	-66.7907	-67.0725
5.05	-66.9127	-65.7946	-67.9063	-67.9434	-67.6959	-66.8834	-67.0955
5.1	-66.7289	-65.7662	-67.8343	-67.8571	-67.7856	-66.9081	-67.0801
5.15	-66.6181	-65.8436	-67.7313	-67.7318	-67.9236	-66.9034	-67.0112
5.2	-66.673	-65.9152	-67.69	-67.6214	-68.0519	-66.9791	-66.9075
5.25	-66.7976	-65.8952	-67.7191	-67.5339	-68.1564	-67.1478	-66.7976
5.3	-66.8281	-65.7804	-67.7344	-67.4723	-68.2505	-67.2595	-66.7311
5.35	-66.7441	-65.6637	-67.6939	-67.4503	-68.2637	-67.2122	-66.7752
5.4	-66.6619	-65.6451	-67.6548	-67.4707	-68.1164	-67.1053	-66.9239
5.45	-66.6514	-65.7206	-67.6458	-67.5184	-67.8839	-67.0675	-67.0489
5.5	-66.6854	-65.783	-67.6473	-67.576	-67.7173	-67.0693	-67.0324
5.55	-66.7292	-65.76	-67.6615	-67.6262	-67.6684	-67.0376	-66.9337
5.6	-66.7864	-65.6847	-67.6859	-67.6676	-67.6775	-66.9685	-66.8788
5.65	-66.8194	-65.6426	-67.6731	-67.72	-67.6958	-66.8696	-66.8675
5.7	-66.7727	-65.7017	-67.5823	-67.8012	-67.7244	-66.7419	-66.8163
5.75	-66.669	-65.8294	-67.4787	-67.8821	-67.7698	-66.6389	-66.7326
5.8	-66.5889	-65.9223	-67.4571	-67.8979	-67.8201	-66.656	-66.7047
5.85	-66.5778	-65.9192	-67.5068	-67.8315	-67.8659	-66.8256	-66.7562
5.9	-66.598	-65.8678	-67.5648	-67.7608	-67.875	-67.0446	-66.841
5.95	-66.5974	-65.8647	-67.6073	-67.7606	-67.8112	-67.1715	-66.9061
6	-66.5692	-65.897	-67.6929	-67.8132	-67.7118	-67.1997	-66.9213
6.05	-66.5486	-65.8713	-67.8586	-67.8438	-67.6656	-67.197	-66.8723
6.1	-66.5865	-65.7848	-67.9658	-67.8201	-67.6779	-67.1723	-66.7948
6.15	-66.6594	-65.7482	-67.8579	-67.7625	-67.6899	-67.1098	-66.7244
6.2	-66.655	-65.8097	-67.576	-67.6862	-67.6937	-67.0373	-66.6444
6.25	-66.4929	-65.8675	-67.3153	-67.5743	-67.7303	-66.9415	-66.5719
6.3	-66.2846	-65.8633	-67.2287	-67.4332	-67.7866	-66.7712	-66.5873
6.35	-66.2542	-65.8609	-67.2793	-67.3167	-67.7826	-66.5825	-66.7153
6.4	-66.4421	-65.8896	-67.355	-67.2672	-67.6662	-66.5257	-66.8484
6.45	-66.6744	-65.8951	-67.4173	-67.2533	-67.5194	-66.6642	-66.8604
6.5	-66.7857	-65.8318	-67.4487	-67.2519	-67.4653	-66.8895	-66.7254
6.55	-66.7761	-65.7511	-67.4261	-67.3066	-67.49	-67.0582	-66.5464
6.6	-66.7436	-65.7253	-67.3559	-67.4111	-67.472	-67.1044	-66.4808
6.65	-66.6979	-65.7485	-67.3181	-67.4707	-67.3624	-67.0367	-66.5688
6.7	-66.5997	-65.7931	-67.4264	-67.4695	-67.2096	-66.8993	-66.6821
6.75	-66.4876	-65.8446	-67.6205	-67.5043	-67.0614	-66.7863	-66.6749
6.8	-66.4334	-65.8974	-67.6995	-67.5962	-66.9456	-66.8066	-66.5676
6.85	-66.4261	-65.9487	-67.5927	-67.6611	-66.9234	-66.975	-66.4768
6.9	-66.3874	-65.9781	-67.4293	-67.6806	-67.0369	-67.2046	-66.441
6.95	-66.3429	-66.012	-67.3537	-67.737	-67.2202	-67.3934	-66.4507
7	-66.3933	-66.0792	-67.3815	-67.8281	-67.3784	-67.4869	-66.4948
7.05	-66.5136	-66.1279	-67.4516	-67.8512	-67.4871	-67.4327	-66.5464
7.1	-66.5931	-66.1356	-67.4986	-67.7815	-67.5821	-67.2053	-66.5415
7.15	-66.5857	-66.1313	-67.4813	-67.7162	-67.6779	-66.9006	-66.4566
7.2	-66.5573	-66.1133	-67.4092	-67.6931	-67.7257	-66.7137	-66.3954
7.25	-66.5891	-66.0473	-67.307	-67.6498	-67.6691	-66.7558	-66.4544
7.3	-66.6302	-65.9664	-67.1831	-67.5734	-67.5452	-66.9186	-66.5782
7.35	-66.572	-65.98	-67.0526	-67.5587	-67.4253	-67.0283	-66.6342
7.4	-66.4041	-66.0948	-66.9956	-67.6585	-67.3126	-67.0042	-66.6037
7.45	-66.241	-66.1603	-67.0875	-67.7775	-67.1919	-66.8674	-66.5924
7.5	-66.1952	-66.1049	-67.2726	-67.8143	-67.0979	-66.7231	-66.6248
7.55	-66.242	-66.0277	-67.4137	-67.7905	-67.0739	-66.6982	-66.6206
7.6	-66.3182	-66.0225	-67.4493	-67.7775	-67.1267	-66.8131	-66.5691
7.65	-66.4133	-66.0702	-67.3977	-67.7787	-67.2345	-66.9275	-66.5784
7.7	-66.5062	-66.1553	-67.2442	-67.7763	-67.3452	-66.9128	-66.7076
7.75	-66.5379	-66.3064	-67.011	-67.7848	-67.4179	-66.7986	-66.8662
7.8	-66.503	-66.4935	-66.8457	-67.7945	-67.4045	-66.7228	-66.9682
7.85	-66.476	-66.5924	-66.8963	-67.7431	-67.2576	-66.7716	-67.0172
7.9	-66.4936	-66.4929	-67.1159	-67.6442	-67.037	-66.8798	-67.0165
7.95	-66.4988	-66.2372	-67.3105	-67.6328	-66.8966	-66.9406	-66.9435
8	-66.4576	-65.9734	-67.3712	-67.7733	-66.8884	-66.9025	-66.8113
8.05	-66.4297	-65.8231	-67.343	-67.9634	-66.9299	-66.7923	-66.7314
8.1	-66.4332	-65.842	-67.3257	-68.0755	-66.9865	-66.707	-66.7781
8.15	-66.4103	-66.0138	-67.3621	-68.0969	-67.0794	-66.6894	-66.8533
8.2	-66.3742	-66.212	-67.4337	-68.0627	-67.1759	-66.6846	-66.8458
8.25	-66.4146	-66.2756	-67.5153	-67.9655	-67.2033	-66.6187	-66.7675
8.3	-66.5072	-66.2009	-67.5348	-67.7978	-67.1604	-66.5087	-66.6972
8.35	-66.5136	-66.1294	-67.4515	-67.6327	-67.1369	-66.4746	-66.6857
8.4	-66.4051	-66.1611	-67.3877	-67.5771	-67.1831	-66.5685	-66.7004
8.45	-66.3052	-66.2558	-67.4954	-67.6473	-67.2565	-66.6935	-66.6961
8.5	-66.321	-66.3169	-67.701	-67.7686	-67.3046	-66.7373	-66.6591
8.55	-66.4273	-66.3232	-67.7698	-67.827	-67.3375	-66.718	-66.6136
8.6	-66.5169	-66.3055	-67.6323	-67.7358	-67.3506	-66.7333	-66.6195
8.65	-66.5137	-66.3129	-67.4305	-67.5146	-67.3089	-66.7841	-66.685
8.7	-66.4051	-66.3721	-67.2877	-67.3157	-67.2585	-66.7852	-66.7454
8.75	-66.2768	-66.4241	-67.2	-67.3027	-67.3066	-66.7033	-66.7451
8.8	-66.2474	-66.3906	-67.1614	-67.4775	-67.4738	-66.6198	-66.7461
8.85	-66.3225	-66.2646	-67.2122	-67.6982	-67.6451	-66.6319	-66.8571
8.9	-66.3886	-66.1407	-67.3515	-67.8217	-67.73	-66.6923	-67.0494
8.95	-66.3539	-66.1224	-67.5092	-67.8086	-67.7583	-66.7027	-67.1794
9	-66.3105	-66.2195	-67.6465	-67.7117	-67.7592	-66.6696	-67.2174
9.05	-66.4098	-66.3466	-67.793	-67.6163	-67.7168	-66.6189	-67.2528
9.1	-66.5984	-66.3914	-67.9526	-67.6095	-67.6568	-66.5356	-67.2709
9.15	-66.6824	-66.2878	-68.0572	-67.7048	-67.6656	-66.437	-67.1755
9.2	-66.5884	-66.0391	-68.0669	-67.8143	-67.7605	-66.4146	-67.001
9.25	-66.4377	-65.7393	-68.0392	-67.8344	-67.8615	-66.5198	-66.9
9.3	-66.3697	-65.5266	-68.049	-67.7678	-67.9372	-66.6295	-66.9159
9.35	-66.4537	-65.4998	-68.0888	-67.7176	-68.0009	-66.6173	-66.963
9.4	-66.6837	-65.6445	-68.1094	-67.7195	-68.0113	-66.5351	-67.0075
9.45	-66.9573	-65.8518	-68.1126	-67.7031	-67.8972	-66.4995	-67.0852
9.5	-67.1292	-66.0142	-68.1201	-67.5999	-67.6968	-66.5615	-67.1627
9.55	-67.1199	-66.1113	-68.0837	-67.4412	-67.5485	-66.6615	-67.1346
9.6	-66.9983	-66.166	-67.9496	-67.3243	-67.4676	-66.7005	-67.0233
9.65	-66.8968	-66.182	-67.7712	-67.3148	-67.3553	-66.6943	-66.9995
9.7	-66.8274	-66.1617	-67.6493	-67.397	-67.2106	-66.7079	-67.1469
9.75	-66.6813	-66.1447	-67.6052	-67.4705	-67.1576	-66.7507	-67.3372
9.8	-66.4474	-66.1643	-67.6005	-67.4577	-67.2604	-66.8216	-67.4052
9.85	-66.2508	-66.2192	-67.6195	-67.392	-67.4251	-66.866	-67.3425
9.9	-66.1696	-66.2877	-67.6552	-67.351	-67.5777	-66.7911	-67.246
9.95	-66.1512	-66.3505	-67.6836	-67.3614	-67.7213	-66.5989	-67.207
10	-66.1522	-66.3769	-67.7109	-67.3553	-67.8206	-66.4282	-67.254
10.05	-66.2116	-66.3313	-67.7551	-67.2724	-67.7938	-66.4285	-67.3227
10.1	-66.3559	-66.2279	-67.7836	-67.1664	-67.6467	-66.5881	-67.3207
10.15	-66.5178	-66.1691	-67.7611	-67.1273	-67.5084	-66.7608	-67.2259
10.2	-66.6292	-66.2271	-67.744	-67.1697	-67.4844	-66.8526	-67.1421
10.25	-66.688	-66.3214	-67.8081	-67.2139	-67.5449	-66.8734	-67.1651
10.3	-66.7166	-66.3189	-67.9234	-67.2084	-67.6153	-66.8131	-67.2247
10.35	-66.716	-66.222	-67.9987	-67.1993	-67.6658	-66.6112	-67.1896
10.4	-66.7058	-66.1483	-68.0251	-67.1839	-67.6943	-66.3326	-67.0411
10.45	-66.7187	-66.1673	-68.0461	-67.1095	-67.6836	-66.1703	-66.8763
10.5	-66.7211	-66.2252	-68.0538	-67.026	-67.6216	-66.2219	-66.7804
10.55	-66.6358	-66.2468	-68.0135	-67.0612	-67.5599	-66.3972	-66.7904
10.6	-66.4925	-66.2168	-67.9359	-67.2216	-67.5607	-66.5728	-66.9109
10.65	-66.4063	-66.1566	-67.8488	-67.3166	-67.6312	-66.7013	-67.0921
10.7	-66.4225	-66.0928	-67.7767	-67.2435	-67.7227	-66.7647	-67.2327
10.75	-66.4927	-66.0721	-67.7465	-67.1354	-67.7558	-66.7349	-67.2573
10.8	-66.5795	-66.1116	-67.7588	-67.0895	-67.6888	-66.6177	-67.1871
10.85	-66.6657	-66.1446	-67.7518	-67.0871	-67.5636	-66.4984	-67.1064
10.9	-66.7129	-66.0871	-67.6692	-67.1078	-67.4805	-66.4513	-67.0565
10.95	-66.6849	-65.9802	-67.5158	-67.1287	-67.4502	-66.4856	-67.025
11	-66.6166	-65.9495	-67.3552	-67.1511	-67.3689	-66.6033	-67.0267
11.05	-66.5742	-66.0307	-67.2551	-67.187	-67.2629	-66.7928	-67.0691
11.1	-66.5852	-66.1499	-67.2245	-67.2443	-67.2934	-66.9521	-67.0709
11.15	-66.6209	-66.2673	-67.2385	-67.3406	-67.4724	-66.9522	-66.966
11.2	-66.6287	-66.3699	-67.3075	-67.4347	-67.5899	-66.8319	-66.8486
11.25	-66.5752	-66.3891	-67.4497	-67.4792	-67.4833	-66.7656	-66.8403
11.3	-66.4648	-66.2587	-67.6239	-67.4825	-67.2792	-66.8407	-66.9008
11.35	-66.315	-66.0378	-67.7545	-67.4175	-67.1873	-66.9706	-66.9217
11.4	-66.1608	-65.8699	-67.7865	-67.2934	-67.2062	-67.0382	-66.8946
11.45	-66.0411	-65.8304	-67.7415	-67.1949	-67.2312	-67.0122	-66.858
11.5	-65.9709	-65.8662	-67.6884	-67.1482	-67.2475	-66.8775	-66.7999
11.55	-65.9547	-65.9041	-67.6557	-67.1799	-67.3238	-66.6624	-66.6903
11.6	-65.9993	-65.9349	-67.61	-67.3426	-67.4662	-66.4891	-66.5661
11.65	-66.0761	-65.9529	-67.5312	-67.5617	-67.5784	-66.4667	-66.4791
11.7	-66.1513	-65.9287	-67.4188	-67.7138	-67.5874	-66.5597	-66.4277
11.75	-66.2454	-65.9062	-67.284	-67.7784	-67.4954	-66.6566	-66.3996
11.8	-66.3692	-65.9979	-67.171	-67.7753	-67.3771	-66.7338	-66.3895
11.85	-66.4681	-66.185	-67.1342	-67.7083	-67.3249	-66.8319	-66.3722
11.9	-66.5126	-66.3282	-67.1774	-67.5949	-67.3617	-66.922	-66.3379
11.95	-66.5507	-66.4036	-67.244	-67.524	-67.4263	-66.9198	-66.3073
12	-66.6068	-66.5311	-67.2873	-67.6112	-67.4386	-66.8241	-66.3043
12.05	-66.6401	-66.7241	-67.2954	-67.7951	-67.3765	-66.7185	-66.3451
12.1	-66.6135	-66.824	-67.2793	-67.8846	-67.27	-66.6532	-66.4179
12.15	-66.5457	-66.7252	-67.23	-67.7975	-67.1799	-66.6005	-66.4515
12.2	-66.4822	-66.5155	-67.1475	-67.6204	-67.1562	-66.5336	-66.3862
12.25	-66.4618	-66.3131	-67.0793	-67.4818	-67.2055	-66.4621	-66.278
12.3	-66.4704	-66.1446	-67.0797	-67.4271	-67.2955	-66.4107	-66.2644
12.35	-66.422	-66.0463	-67.1402	-67.4243	-67.3907	-66.3915	-66.4008
12.4	-66.2387	-66.082	-67.2037	-67.4239	-67.4322	-66.4044	-66.5927
12.45	-65.9874	-66.2148	-67.2509	-67.3728	-67.3582	-66.4352	-66.7406
12.5	-65.8087	-66.3248	-67.2736	-67.264	-67.1815	-66.4548	-66.8483
12.55	-65.7453	-66.3856	-67.2336	-67.1575	-67.0105	-66.445	-66.9345
12.6	-65.7764	-66.451	-67.1148	-67.1132	-66.9638	-66.4333	-66.9737
12.65	-65.9097	-66.5232	-67.0013	-67.1128	-67.0512	-66.4521	-66.98
12.7	-66.1373	-66.5304	-67.0329	-67.1235	-67.1595	-66.4611	-67.0047
12.75	-66.366	-66.4503	-67.2198	-67.1816	-67.21	-66.4108	-67.0329
12.8	-66.5107	-66.3667	-67.4135	-67.3418	-67.2568	-66.362	-67.015
12.85	-66.5683	-66.352	-67.4706	-67.5513	-67.3343	-66.3978	-66.997
12.9	-66.5518	-66.3963	-67.3884	-67.6798	-67.3517	-66.4897	-67.0379
12.95	-66.4131	-66.4656	-67.232	-67.6908	-67.2421	-66.5716	-67.0776
13	-66.1484	-66.5576	-67.0695	-67.6374	-67.0798	-66.6354	-67.0136
13.05	-65.8828	-66.6374	-67.0312	-67.5466	-66.9307	-66.709	-66.8677
13.1	-65.7528	-66.5951	-67.2098	-67.4238	-66.7836	-66.7953	-66.7311
13.15	-65.7774	-66.3631	-67.4758	-67.3511	-66.6464	-66.8741	-66.6181
13.2	-65.9098	-66.0569	-67.5752	-67.401	-66.5696	-66.9217	-66.495
13.25	-66.1329	-65.8809	-67.4545	-67.508	-66.5609	-66.9304	-66.3968
13.3	-66.3959	-65.8994	-67.3069	-67.5578	-66.5944	-66.9045	-66.3959
13.35	-66.5761	-66.03	-67.2797	-67.5207	-66.6712	-66.8635	-66.4922
13.4	-66.5779	-66.1666	-67.3397	-67.4299	-66.8029	-66.831	-66.6212
13.45	-66.452	-66.2348	-67.3942	-67.2976	-66.935	-66.8173	-66.7599
13.5	-66.3641	-66.2054	-67.4191	-67.1684	-66.9955	-66.7676	-66.9356
13.55	-66.3864	-66.1409	-67.4118	-67.1404	-66.9939	-66.6213	-67.0948
13.6	-66.4285	-66.1596	-67.3549	-67.2532	-67.008	-66.4272	-67.1215
13.65	-66.4026	-66.2639	-67.3049	-67.4145	-67.0635	-66.2978	-67.0008
13.7	-66.3367	-66.3459	-67.342	-67.5142	-67.1045	-66.2467	-66.8649
13.75	-66.2403	-66.3325	-67.4283	-67.5721	-67.0715	-66.1885	-66.8153
13.8	-66.0886	-66.2441	-67.43	-67.6789	-67.0052	-66.0752	-66.8103
13.85	-65.9995	-66.1365	-67.3273	-67.8123	-66.9982	-65.9799	-66.772
13.9	-66.1422	-66.0713	-67.2754	-67.8519	-67.0647	-66.0052	-66.7307
13.95	-66.4632	-66.1253	-67.3529	-67.7608	-67.1262	-66.1288	-66.7737
14	-66.7019	-66.2721	-67.4651	-67.6233	-67.1363	-66.2378	-66.8947
14.05	-66.7197	-66.3584	-67.5278	-67.5198	-67.1258	-66.2826	-67.0285
14.1	-66.6201	-66.3007	-67.5876	-67.4815	-67.143	-66.3386	-67.1393
14.15	-66.5451	-66.1883	-67.6778	-67.5386	-67.2007	-66.4583	-67.2199
14.2	-66.5186	-66.1383	-67.6729	-67.6903	-67.2795	-66.5608	-67.2521
14.25	-66.4809	-66.1295	-67.5018	-67.8344	-67.3141	-66.5506	-67.2276
14.3	-66.4049	-66.0996	-67.2987	-67.8506	-67.2463	-66.4781	-67.1587
14.35	-66.3005	-66.0683	-67.1958	-67.741	-67.1185	-66.4281	-67.078
14.4	-66.2036	-66.0955	-67.1756	-67.6206	-67.0601	-66.3726	-67.0441
14.45	-66.2079	-66.1892	-67.1734	-67.583	-67.1196	-66.2622	-67.0711
14.5	-66.3794	-66.2825	-67.2363	-67.6194	-67.2032	-66.1525	-67.0999
14.55	-66.6329	-66.337	-67.4238	-67.6642	-67.2165	-66.1248	-67.0666
14.6	-66.7765	-66.3781	-67.6215	-67.6889	-67.1856	-66.1734	-66.981
14.65	-66.7562	-66.4036	-67.6924	-67.6784	-67.1746	-66.2601	-66.8843
14.7	-66.701	-66.3585	-67.6491	-67.6252	-67.1828	-66.3685	-66.8065
14.75	-66.6814	-66.1888	-67.5754	-67.5682	-67.1775	-66.4615	-66.7908
14.8	-66.648	-65.951	-67.5054	-67.5618	-67.1682	-66.4627	-66.8756
14.85	-66.5669	-65.7988	-67.4156	-67.5751	-67.1736	-66.367	-67.0586
14.9	-66.492	-65.8077	-67.339	-67.5135	-67.1798	-66.2797	-67.2477
14.95	-66.505	-65.9111	-67.3274	-67.3496	-67.1944	-66.286	-67.3217
15	-66.6035	-66.0065	-67.3132	-67.1713	-67.2554	-66.3741	-67.2649
15.05	-66.7235	-66.0957	-67.2417	-67.0747	-67.3578	-66.5052	-67.1773
15.1	-66.8078	-66.2246	-67.1845	-67.0811	-67.4625	-66.6606	-67.1529
15.15	-66.8349	-66.3366	-67.2179	-67.1847	-67.5768	-66.7775	-67.166
15.2	-66.8246	-66.3774	-67.3318	-67.3789	-67.6907	-66.784	-67.1451
15.25	-66.8132	-66.3751	-67.4669	-67.5941	-67.7311	-66.7039	-67.0778
15.3	-66.8279	-66.3445	-67.5832	-67.7014	-67.652	-66.6518	-67.0099
15.35	-66.8241	-66.2662	-67.64	-67.6774	-67.5136	-66.6779	-66.9863
15.4	-66.743	-66.1068	-67.6272	-67.633	-67.387	-66.6986	-67.0059
15.45	-66.6274	-65.8932	-67.6019	-67.6435	-67.2606	-66.6741	-67.0438
15.5	-66.5279	-65.7372	-67.5937	-67.6608	-67.1111	-66.6768	-67.0536
15.55	-66.4706	-65.7186	-67.5404	-67.6269	-67.0141	-66.7469	-67.0139
15.6	-66.5041	-65.8288	-67.4128	-67.5552	-67.0706	-66.7997	-66.9855
15.65	-66.6055	-65.9865	-67.2975	-67.4879	-67.2621	-66.7558	-67.0407
15.7	-66.6806	-66.1164	-67.2585	-67.4338	-67.4817	-66.6664	-67.1688
15.75	-66.6441	-66.2016	-67.2322	-67.3925	-67.6342	-66.6257	-67.2339
15.8	-66.5054	-66.2595	-67.1443	-67.4034	-67.679	-66.6612	-67.1405
15.85	-66.4099	-66.2964	-67.0677	-67.4873	-67.6224	-66.7169	-66.9941
15.9	-66.4883	-66.2952	-67.1277	-67.5827	-67.5331	-66.7346	-66.9612
15.95	-66.6888	-66.2338	-67.3095	-67.6111	-67.4816	-66.7162	-67.0538
16	-66.8518	-66.1417	-67.467	-67.5798	-67.4324	-66.7186	-67.1233
16.05	-66.9346	-66.0861	-67.4955	-67.5195	-67.286	-66.7971	-67.0826
16.1	-67.0028	-66.0356	-67.4237	-67.4175	-67.0684	-66.9002	-67.0121
16.15	-67.0308	-65.9052	-67.314	-67.2609	-66.9455	-66.9125	-66.9687
16.2	-66.9127	-65.7235	-67.2177	-67.1003	-66.9968	-66.791	-66.9166
16.25	-66.6512	-65.6345	-67.194	-67.0199	-67.115	-66.6283	-66.8487
16.3	-66.371	-65.707	-67.2662	-67.0481	-67.1522	-66.5601	-66.8316
16.35	-66.16	-65.8309	-67.3534	-67.1596	-67.0939	-66.6041	-66.9006
16.4	-66.0388	-65.8717	-67.3436	-67.3117	-67.0255	-66.6852	-66.9666
16.45	-66.0067	-65.823	-67.2844	-67.4457	-67.0032	-66.7416	-66.9526
16.5	-66.0666	-65.754	-67.3216	-67.461	-67.0584	-66.7545	-66.9045
16.55	-66.194	-65.6927	-67.477	-67.2961	-67.2293	-66.72	-66.8981
16.6	-66.328	-65.6618	-67.615	-67.0513	-67.4893	-66.647	-66.9583
16.65	-66.409	-65.6981	-67.5891	-66.9285	-67.6807	-66.5872	-67.0303
16.7	-66.3902	-65.754	-67.4037	-66.997	-67.6766	-66.5658	-67.0681
16.75	-66.2799	-65.7602	-67.1889	-67.1235	-67.5312	-66.5654	-67.0902
16.8	-66.152	-65.7511	-67.0652	-67.1857	-67.4031	-66.5914	-67.0679
16.85	-66.1115	-65.8112	-67.051	-67.1806	-67.4006	-66.6455	-66.9704
16.9	-66.213	-65.8865	-67.1151	-67.1293	-67.5023	-66.7153	-66.852
16.95	-66.3601	-65.8332	-67.2255	-67.0406	-67.6188	-66.7566	-66.7602
17	-66.3817	-65.6928	-67.3122	-66.992	-67.6861	-66.7325	-66.6691
17.05	-66.235	-65.6685	-67.3267	-67.0753	-67.6874	-66.6832	-66.5578
17.1	-66.0884	-65.8414	-67.298	-67.2411	-67.604	-66.6253	-66.4856
17.15	-66.1024	-66.071	-67.2686	-67.3557	-67.4264	-66.5224	-66.5235
17.2	-66.2053	-66.2109	-67.2197	-67.356	-67.2292	-66.3924	-66.6553
17.25	-66.235	-66.2686	-67.1288	-67.2905	-67.0952	-66.3156	-66.7977
17.3	-66.1656	-66.2569	-67.0252	-67.2156	-67.0094	-66.3339	-66.8967
17.35	-66.1306	-66.1561	-66.9656	-67.146	-66.9099	-66.3749	-66.9483
17.4	-66.2188	-66.0481	-66.9652	-67.1455	-66.814	-66.3827	-66.9104
17.45	-66.3392	-66.0866	-67.0037	-67.2928	-66.7901	-66.4086	-66.7549
17.5	-66.3771	-66.2772	-67.0839	-67.5262	-66.8211	-66.4679	-66.5921
17.55	-66.3241	-66.4649	-67.2195	-67.6431	-66.8426	-66.5113	-66.589
17.6	-66.2405	-66.5647	-67.3411	-67.5465	-66.8366	-66.5389	-66.7374
17.65	-66.1758	-66.6457	-67.3657	-67.3666	-66.8223	-66.5917	-66.8784
17.7	-66.1792	-66.7574	-67.3392	-67.2638	-66.8101	-66.6869	-66.9362
17.75	-66.278	-66.8235	-67.357	-67.2574	-66.8096	-66.7667	-66.9379
17.8	-66.4017	-66.7524	-67.3748	-67.2624	-66.8382	-66.7615	-66.8862
17.85	-66.4414	-66.568	-67.2925	-67.2458	-66.863	-66.6737	-66.7753
17.9	-66.3954	-66.3973	-67.1561	-67.2818	-66.8593	-66.5334	-66.6992
17.95	-66.3578	-66.3255	-67.1262	-67.4101	-66.8812	-66.4041	-66.7695
18	-66.3412	-66.3348	-67.2414	-67.5692	-66.9568	-66.3662	-66.9508
18.05	-66.2509	-66.3721	-67.3896	-67.6595	-67.0283	-66.3972	-67.1237
18.1	-66.082	-66.396	-67.4982	-67.6357	-66.9889	-66.4321	-67.232
18.15	-65.984	-66.365	-67.5805	-67.5514	-66.8055	-66.4405	-67.3151
18.2	-66.0107	-66.2907	-67.6062	-67.5063	-66.5988	-66.4193	-67.3819
18.25	-66.0234	-66.2155	-67.5447	-67.5442	-66.5324	-66.4334	-67.3686
18.3	-65.9462	-66.1355	-67.4715	-67.598	-66.6589	-66.5374	-67.269
18.35	-65.9102	-66.0447	-67.4814	-67.6268	-66.9066	-66.6721	-67.1663
18.4	-66.0032	-66.0135	-67.5299	-67.7086	-67.1746	-66.704	-67.1581
18.45	-66.1173	-66.1045	-67.503	-67.8564	-67.3743	-66.5966	-67.2476
18.5	-66.139	-66.2699	-67.3926	-67.9434	-67.4408	-66.4612	-67.3586
18.55	-66.0979	-66.3889	-67.3095	-67.8665	-67.3726	-66.4101	-67.4343
18.6	-66.0291	-66.3968	-67.3014	-67.68	-67.2417	-66.4206	-67.4151
18.65	-65.8998	-66.3354	-67.2946	-67.51	-67.1523	-66.4227	-67.2754
18.7	-65.7253	-66.2815	-67.2363	-67.3753	-67.142	-66.4302	-67.1283
18.75	-65.6355	-66.2402	-67.1818	-67.2621	-67.1702	-66.5029	-67.1654
18.8	-65.7024	-66.1821	-67.1734	-67.246	-67.2165	-66.627	-67.4035
18.85	-65.8414	-66.1259	-67.1665	-67.358	-67.3225	-66.6907	-67.6346
18.9	-65.9619	-66.1149	-67.1332	-67.4924	-67.4782	-66.5981	-67.7095
18.95	-66.0817	-66.1407	-67.1304	-67.519	-67.5641	-66.3727	-67.6668
19	-66.2002	-66.1672	-67.1749	-67.462	-67.5027	-66.1315	-67.5779
19.05	-66.2362	-66.1634	-67.1894	-67.4641	-67.3549	-65.9811	-67.4637
19.1	-66.1649	-66.09	-67.1406	-67.5187	-67.2227	-65.9916	-67.364
19.15	-66.0869	-65.9275	-67.0981	-67.5002	-67.1166	-66.169	-67.3059
19.2	-66.0803	-65.7374	-67.1009	-67.4015	-67.0212	-66.4206	-67.2733
19.25	-66.1028	-65.6168	-67.1096	-67.3092	-67.0139	-66.6146	-67.253
19.3	-66.0946	-65.6124	-67.1334	-67.2866	-67.1273	-66.6685	-67.263
19.35	-66.069	-65.7081	-67.2495	-67.3368	-67.2425	-66.6212	-67.3029
19.4	-66.0405	-65.8714	-67.4686	-67.4051	-67.238	-66.5663	-67.341
19.45	-65.9906	-66.0503	-67.6779	-67.4421	-67.1255	-66.5507	-67.3418
19.5	-65.9377	-66.1635	-67.7918	-67.4345	-67.0169	-66.5789	-67.3375
19.55	-65.9429	-66.189	-67.8358	-67.4198	-66.9875	-66.6544	-67.4112
19.6	-66.0111	-66.2039	-67.8467	-67.45	-67.0378	-66.7504	-67.6035
19.65	-66.07	-66.2529	-67.8022	-67.4799	-67.1216	-66.7737	-67.8504
19.7	-66.0944	-66.2793	-67.719	-67.4373	-67.1787	-66.6827	-68.0427
19.75	-66.1447	-66.2491	-67.6683	-67.3441	-67.2219	-66.5472	-68.1108
19.8	-66.233	-66.2071	-67.6654	-67.253	-67.302	-66.4389	-68.0623
19.85	-66.2944	-66.2108	-67.6322	-67.2419	-67.4196	-66.3557	-67.9588
19.9	-66.3436	-66.2658	-67.5104	-67.3575	-67.5351	-66.282	-67.8613
19.95	-66.4472	-66.3328	-67.332	-67.4758	-67.6115	-66.2459	-67.7705
20	-66.5674	-66.3612	-67.1768	-67.4741	-67.6791	-66.235	-67.6574
20.05	-66.6126	-66.3469	-67.1138	-67.4024	-67.7664	-66.1977	-67.553
20.1	-66.611	-66.3077	-67.189	-67.3184	-67.8013	-66.1381	-67.5559
20.15	-66.6656	-66.2489	-67.4025	-67.2259	-67.6998	-66.1336	-67.6701
20.2	-66.7869	-66.1793	-67.6277	-67.1575	-67.4875	-66.2209	-67.7659
20.25	-66.8598	-66.1244	-67.7013	-67.1442	-67.3123	-66.3588	-67.7673
20.3	-66.8064	-66.0879	-67.6097	-67.1746	-67.2938	-66.503	-67.7382
20.35	-66.6808	-66.0531	-67.478	-67.1662	-67.398	-66.6487	-67.7403
20.4	-66.5907	-66.0177	-67.3704	-67.0771	-67.496	-66.7613	-67.7453
20.45	-66.5566	-65.991	-67.2801	-67.0213	-67.5127	-66.7918	-67.716
20.5	-66.4994	-65.981	-67.2682	-67.1005	-67.4813	-66.7576	-67.6907
20.55	-66.3662	-65.9932	-67.4038	-67.2355	-67.4542	-66.7237	-67.7073
20.6	-66.1907	-66.0356	-67.6247	-67.286	-67.436	-66.7093	-67.7131
20.65	-66.0664	-66.1007	-67.7783	-67.2543	-67.3777	-66.6972	-67.633
20.7	-66.1021	-66.1723	-67.7955	-67.2456	-67.2212	-66.6997	-67.5008
20.75	-66.3183	-66.1992	-67.7244	-67.2872	-66.9763	-66.7575	-67.4135
20.8	-66.5729	-66.1395	-67.631	-67.3204	-66.7615	-66.8501	-67.4135
20.85	-66.7197	-66.0378	-67.5501	-67.3076	-66.683	-66.899	-67.4574
20.9	-66.7438	-65.9828	-67.497	-67.2561	-66.7207	-66.8884	-67.4869
20.95	-66.6995	-66.0053	-67.469	-67.1587	-66.8006	-66.8906	-67.4862
21	-66.6062	-66.086	-67.4216	-67.009	-66.9345	-66.9205	-67.4787
21.05	-66.466	-66.2166	-67.3404	-66.847	-67.162	-66.9177	-67.4584
21.1	-66.3073	-66.3574	-67.2826	-66.7483	-67.413	-66.8646	-67.3979
21.15	-66.1948	-66.4187	-67.2948	-66.7511	-67.5584	-66.8228	-67.2969
21.2	-66.1876	-66.3416	-67.3424	-66.8483	-67.5715	-66.8291	-67.176
21.25	-66.2945	-66.1861	-67.3647	-67.0295	-67.5289	-66.8513	-67.0439
21.3	-66.4777	-66.0656	-67.3655	-67.2768	-67.4933	-66.8573	-66.9126
21.35	-66.6308	-66.0198	-67.3802	-67.4804	-67.483	-66.8716	-66.8167
21.4	-66.6389	-66.0342	-67.4077	-67.4798	-67.4777	-66.9001	-66.8104
21.45	-66.5018	-66.1204	-67.3931	-67.275	-67.4212	-66.8954	-66.9161
21.5	-66.3406	-66.3086	-67.3173	-67.0484	-67.2845	-66.8269	-67.0677
21.55	-66.2545	-66.5295	-67.2583	-66.9569	-67.1073	-66.7271	-67.168
21.6	-66.2457	-66.6226	-67.2784	-67.0107	-66.9642	-66.6297	-67.2056
21.65	-66.3148	-66.5067	-67.3317	-67.1471	-66.9263	-66.5523	-67.2624
21.7	-66.4669	-66.2943	-67.3249	-67.2917	-66.9788	-66.5263	-67.3699
21.75	-66.6371	-66.1775	-67.2751	-67.3533	-67.0097	-66.5768	-67.4567
21.8	-66.705	-66.2087	-67.2994	-67.2857	-66.9452	-66.6804	-67.4545
21.85	-66.6282	-66.3018	-67.4083	-67.1397	-66.8415	-66.8032	-67.387
21.9	-66.4937	-66.3859	-67.4708	-67.0305	-66.7716	-66.9416	-67.3109
21.95	-66.4224	-66.4444	-67.3746	-67.0015	-66.7299	-67.0734	-67.2553
22	-66.4249	-66.4399	-67.1702	-67.0385	-66.6894	-67.1367	-67.2001
22.05	-66.3676	-66.3721	-67.0153	-67.1543	-66.6801	-67.0921	-67.106
22.1	-66.184	-66.3337	-67.0186	-67.3418	-66.7263	-67.0023	-66.9733
22.15	-65.9859	-66.35	-67.1656	-67.5033	-66.774	-66.9642	-66.8667
22.2	-65.9043	-66.3462	-67.3244	-67.5432	-66.7439	-66.9944	-66.8554
22.25	-65.9402	-66.2976	-67.3714	-67.4784	-66.6575	-67.0346	-66.9364
22.3	-66.0172	-66.255	-67.3007	-67.4285	-66.6051	-67.0634	-67.0518
22.35	-66.1017	-66.2454	-67.2104	-67.4743	-66.6157	-67.1053	-67.1497
22.4	-66.1791	-66.2284	-67.2154	-67.5768	-66.6422	-67.1496	-67.2307
22.45	-66.1955	-66.1882	-67.2893	-67.6492	-66.6711	-67.1217	-67.2875
22.5	-66.1131	-66.1562	-67.3077	-67.6763	-66.7259	-66.9688	-67.2612
22.55	-66.0151	-66.1572	-67.2548	-67.6855	-66.7807	-66.7489	-67.1398
22.6	-66.048	-66.1951	-67.2175	-67.6846	-66.7833	-66.5873	-67.0478
22.65	-66.1828	-66.266	-67.2255	-67.6851	-66.7526	-66.5516	-67.0928
22.7	-66.2411	-66.3413	-67.2302	-67.7176	-66.7371	-66.6206	-67.2382
22.75	-66.1788	-66.3336	-67.2463	-67.7779	-66.7352	-66.7494	-67.4262
22.8	-66.1535	-66.2167	-67.3268	-67.8387	-66.7205	-66.8884	-67.6228
22.85	-66.2627	-66.1225	-67.3925	-67.8888	-66.7351	-67.0118	-67.7404
22.9	-66.3722	-66.1734	-67.3367	-67.9227	-66.8337	-67.1156	-67.6846
22.95	-66.3409	-66.3351	-67.221	-67.8939	-66.9251	-67.1866	-67.4915
23	-66.2286	-66.4706	-67.2054	-67.772	-66.8521	-67.1877	-67.3047
23.05	-66.1911	-66.5214	-67.3097	-67.6089	-66.6565	-67.0914	-67.2076
23.1	-66.2702	-66.5421	-67.3597	-67.4895	-66.5471	-66.9075	-67.1815
23.15	-66.3517	-66.5515	-67.2916	-67.4486	-66.6104	-66.7163	-67.1975
23.2	-66.3639	-66.5377	-67.2629	-67.4754	-66.7486	-66.63	-67.2645
23.25	-66.3494	-66.5173	-67.3315	-67.5722	-66.8871	-66.6622	-67.3331
23.3	-66.3582	-66.4959	-67.3699	-67.7302	-67.0401	-66.7327	-67.3088
23.35	-66.4121	-66.4345	-67.3096	-67.8767	-67.1835	-66.7684	-67.208
23.4	-66.4885	-66.2789	-67.2509	-67.9187	-67.2568	-66.754	-67.1612
23.45	-66.5367	-66.0883	-67.3183	-67.8716	-67.2795	-66.6984	-67.2279
23.5	-66.5364	-66.0262	-67.4682	-67.833	-67.349	-66.6262	-67.319
23.55	-66.53	-66.1551	-67.5662	-67.8679	-67.4797	-66.5895	-67.3659
23.6	-66.5892	-66.3657	-67.5335	-67.9749	-67.5794	-66.6171	-67.3613
23.65	-66.6815	-66.5104	-67.3757	-68.1162	-67.5911	-66.6899	-67.2637
23.7	-66.6991	-66.5511	-67.17	-68.203	-67.5589	-66.7611	-67.0868
23.75	-66.6384	-66.5234	-67.045	-68.1397	-67.5134	-66.8171	-66.9948
23.8	-66.5651	-66.426	-67.0877	-67.9343	-67.435	-66.8587	-67.1219
23.85	-66.5021	-66.283	-67.2463	-67.7341	-67.3367	-66.8499	-67.3349
23.9	-66.4517	-66.14	-67.3766	-67.6709	-67.2574	-66.7522	-67.4134
23.95	-66.4784	-66.0149	-67.4285	-67.7087	-67.1726	-66.6084	-67.3735
24	-66.6424	-65.9302	-67.458	-67.7437	-67.0399	-66.5241	-67.373
24.05	-66.8079	-65.9198	-67.4895	-67.7629	-66.9223	-66.5171	-67.4331
24.1	-66.7789	-65.9643	-67.4839	-67.8092	-66.942	-66.5187	-67.4237
24.15	-66.5821	-66.0082	-67.4516	-67.8664	-67.1093	-66.4925	-67.318
24.2	-66.4059	-66.0572	-67.4675	-67.9042	-67.3007	-66.4682	-67.2575
24.25	-66.3346	-66.1735	-67.5264	-67.9242	-67.4408	-66.4722	-67.3179
24.3	-66.3024	-66.3466	-67.5312	-67.9167	-67.5439	-66.49	-67.4087
24.35	-66.28	-66.4964	-67.4552	-67.8181	-67.5938	-66.5163	-67.4059
24.4	-66.3104	-66.5647	-67.3962	-67.5967	-67.5296	-66.5298	-67.3155
24.45	-66.3644	-66.5444	-67.4249	-67.3385	-67.3729	-66.4785	-67.2397
24.5	-66.3505	-66.4595	-67.508	-67.1688	-67.2412	-66.3656	-67.2336
24.55	-66.2589	-66.3361	-67.5955	-67.1313	-67.216	-66.2893	-67.3084
24.6	-66.1758	-66.1975	-67.6465	-67.2002	-67.2738	-66.3465	-67.4296
24.65	-66.1226	-66.0752	-67.6438	-67.3444	-67.3604	-66.4811	-67.5031
24.7	-66.0487	-66.033	-67.6123	-67.4921	-67.4708	-66.5557	-67.4629
24.75	-65.9979	-66.0866	-67.6012	-67.548	-67.5513	-66.5343	-67.3428
24.8	-66.0973	-66.1417	-67.623	-67.4796	-67.4924	-66.4968	-67.2563
24.85	-66.3295	-66.1068	-67.6081	-67.3544	-67.3172	-66.4783	-67.2624
24.9	-66.5024	-66.0185	-67.5201	-67.2744	-67.1945	-66.4131	-67.3376
24.95	-66.4975	-65.9925	-67.4299	-67.2945	-67.2098	-66.3275	-67.4581
25	-66.361	-66.037	-67.4244	-67.4104	-67.2845	-66.3612	-67.5691
25.05	-66.1984	-66.0508	-67.496	-67.5482	-67.3383	-66.5422	-67.6095
25.1	-66.1008	-65.9833	-67.5664	-67.6073	-67.3498	-66.7568	-67.593
25.15	-66.1254	-65.8698	-67.5928	-67.5275	-67.3044	-66.8868	-67.5647
25.2	-66.2446	-65.8152	-67.5557	-67.3292	-67.1926	-66.9283	-67.5343
25.25	-66.3351	-65.9104	-67.4564	-67.098	-67.0887	-66.9378	-67.4458
25.3	-66.3356	-66.1291	-67.3741	-66.965	-67.1173	-66.9145	-67.2834
25.35	-66.3374	-66.3332	-67.4144	-67.0348	-67.2884	-66.8647	-67.1439
25.4	-66.4412	-66.3762	-67.5548	-67.2494	-67.4883	-66.8355	-67.1103
25.45	-66.5803	-66.2372	-67.6586	-67.4442	-67.6032	-66.8661	-67.1312
25.5	-66.5931	-66.0284	-67.6587	-67.5073	-67.5972	-66.9535	-67.121
25.55	-66.4559	-65.9048	-67.6095	-67.4275	-67.5003	-67.029	-67.1017
25.6	-66.2976	-65.9226	-67.5698	-67.2345	-67.3966	-67.0414	-67.1249
25.65	-66.2458	-65.9967	-67.5293	-66.9895	-67.3924	-67.0097	-67.1247
25.7	-66.3189	-66.029	-67.4609	-66.8255	-67.4872	-66.9688	-67.0296
25.75	-66.4227	-65.9906	-67.3658	-66.8237	-67.5602	-66.9353	-66.9116
25.8	-66.4341	-65.9178	-67.2759	-66.9062	-67.5089	-66.8933	-66.9
25.85	-66.2911	-65.8565	-67.2065	-66.9342	-67.372	-66.8392	-67.0044
25.9	-66.0982	-65.8236	-67.1461	-66.8963	-67.2663	-66.7908	-67.1399
25.95	-66.0538	-65.8124	-67.0909	-66.9132	-67.2262	-66.7553	-67.2226
26	-66.2305	-65.8141	-67.0669	-67.0196	-67.2082	-66.7773	-67.2058
26.05	-66.5191	-65.8226	-67.0592	-67.1211	-67.1838	-66.8716	-67.1162
26.1	-66.7743	-65.8734	-67.0058	-67.1337	-67.1706	-66.9508	-67.0283
26.15	-66.9051	-66.0035	-66.9078	-67.0908	-67.1814	-66.956	-67.0104
26.2	-66.8614	-66.143	-66.8546	-67.0944	-67.1937	-66.9002	-67.0838
26.25	-66.6691	-66.181	-66.8772	-67.1759	-67.1993	-66.8226	-67.209
26.3	-66.4413	-66.1399	-66.9051	-67.293	-67.175	-66.7753	-67.2733
26.35	-66.2868	-66.1397	-66.8692	-67.3859	-67.0964	-66.7677	-67.1552
26.4	-66.2131	-66.211	-66.79	-67.4173	-67.0214	-66.7933	-66.9164
26.45	-66.1425	-66.2606	-66.7281	-67.4045	-67.0244	-66.861	-66.7735
26.5	-65.9977	-66.2358	-66.6998	-67.3858	-67.0903	-66.9281	-66.8549
26.55	-65.7995	-66.2105	-66.6906	-67.392	-67.1231	-66.9404	-67.0702
26.6	-65.6613	-66.2608	-66.7106	-67.4022	-67.09	-66.8634	-67.2186
26.65	-65.6891	-66.3574	-66.7524	-67.3821	-67.0473	-66.7174	-67.2317
26.7	-65.869	-66.4151	-66.7398	-67.3683	-67.0237	-66.5971	-67.2067
26.75	-66.1051	-66.3821	-66.612	-67.3974	-66.9743	-66.5793	-67.2282
26.8	-66.3124	-66.2645	-66.4605	-67.4351	-66.8758	-66.6485	-67.2573
26.85	-66.4415	-66.1215	-66.4396	-67.4351	-66.7811	-66.7423	-67.2043
26.9	-66.4558	-66.0324	-66.5602	-67.4335	-66.7646	-66.8202	-67.0565
26.95	-66.3655	-66.055	-66.6992	-67.498	-66.8378	-66.8679	-66.8911
27	-66.2363	-66.1651	-66.7952	-67.568	-66.9769	-66.8522	-66.8332
27.05	-66.1483	-66.257	-66.882	-67.5425	-67.1659	-66.7701	-66.947
27.1	-66.1111	-66.2636	-66.9592	-67.4561	-67.3653	-66.6941	-67.1365
27.15	-66.0839	-66.2403	-66.987	-67.3979	-67.485	-66.7203	-67.2516
27.2	-66.0643	-66.2555	-66.9836	-67.3684	-67.4469	-66.8439	-67.2733
27.25	-66.0826	-66.279	-67.0176	-67.2823	-67.3124	-66.9497	-67.2941
27.3	-66.122	-66.2432	-67.1188	-67.1395	-67.2364	-66.9632	-67.3183
27.35	-66.1522	-66.1594	-67.2459	-67.0684	-67.2677	-66.9159	-67.2465
27.4	-66.1768	-66.1068	-67.3305	-67.1068	-67.2897	-66.8787	-67.0646
27.45	-66.2081	-66.1365	-67.3514	-67.1875	-67.1959	-66.8644	-66.9183
27.5	-66.2286	-66.2417	-67.3305	-67.2845	-67.0601	-66.8446	-66.908
27.55	-66.2284	-66.3859	-67.3017	-67.3848	-67.0079	-66.8108	-66.9779
27.6	-66.2415	-66.5248	-67.2855	-67.4699	-67.0415	-66.7895	-67.0619
27.65	-66.3135	-66.6189	-67.2728	-67.5241	-67.0615	-66.7772	-67.1929
27.7	-66.4015	-66.6704	-67.2224	-67.5568	-67.0097	-66.7229	-67.3777
27.75	-66.4187	-66.7077	-67.137	-67.6211	-66.9428	-66.6399	-67.5213
27.8	-66.3585	-66.7163	-67.075	-67.7069	-66.9008	-66.6101	-67.5469
27.85	-66.3002	-66.658	-67.0771	-67.7478	-66.8556	-66.6643	-67.5193
27.9	-66.2728	-66.5673	-67.0939	-67.7369	-66.8102	-66.7332	-67.5365
27.95	-66.2333	-66.5207	-67.0213	-67.6937	-66.7895	-66.726	-67.5766
28	-66.1738	-66.5312	-66.8342	-67.638	-66.79	-66.6183	-67.5652
28.05	-66.1489	-66.5376	-66.661	-67.5826	-66.762	-66.4322	-67.5289
28.1	-66.1616	-66.5106	-66.6346	-67.4949	-66.6752	-66.2475	-67.5239
28.15	-66.1529	-66.4738	-66.7495	-67.3952	-66.6207	-66.1785	-67.5099
28.2	-66.1172	-66.4422	-66.9468	-67.3509	-66.689	-66.2649	-67.4484
28.25	-66.1185	-66.4171	-67.198	-67.3561	-66.8365	-66.4216	-67.4188
28.3	-66.1691	-66.4232	-67.4595	-67.4112	-66.9631	-66.5479	-67.49
28.35	-66.2061	-66.4498	-67.6255	-67.5272	-67.0207	-66.6297	-67.6234
28.4	-66.1923	-66.4214	-67.641	-67.6172	-67.0422	-66.6606	-67.7517
28.45	-66.1723	-66.2917	-67.5573	-67.6245	-67.0606	-66.5985	-67.8286
28.5	-66.1872	-66.1373	-67.4244	-67.624	-67.0939	-66.4401	-67.8125
28.55	-66.2021	-66.0663	-67.2381	-67.6717	-67.1585	-66.2749	-67.711
28.6	-66.1997	-66.0866	-67.0477	-67.7312	-67.1982	-66.2114	-67.5995
28.65	-66.243	-66.1233	-66.989	-67.7357	-67.1408	-66.257	-67.552
28.7	-66.3714	-66.1348	-67.1106	-67.7104	-67.0384	-66.304	-67.5492
28.75	-66.5127	-66.1597	-67.2851	-67.7565	-67.0206	-66.2824	-67.5208
28.8	-66.6	-66.2523	-67.3699	-67.8526	-67.0766	-66.2534	-67.4673
28.85	-66.6555	-66.4019	-67.3768	-67.8872	-67.091	-66.3137	-67.4659
28.9	-66.6992	-66.5229	-67.3735	-67.851	-67.0696	-66.4217	-67.5253
28.95	-66.6785	-66.5638	-67.3325	-67.8329	-67.132	-66.4587	-67.5575
29	-66.5748	-66.536	-67.1919	-67.8599	-67.2752	-66.4085	-67.5398
29.05	-66.4436	-66.4842	-67.004	-67.8805	-67.3678	-66.3647	-67.5615
29.1	-66.3221	-66.4456	-66.8974	-67.8705	-67.3837	-66.3662	-67.6517
29.15	-66.2019	-66.4061	-66.919	-67.8471	-67.4384	-66.3787	-67.7386
29.2	-66.1117	-66.2894	-67.0192	-67.7967	-67.5567	-66.387	-67.7737
29.25	-66.1236	-66.0808	-67.1172	-67.6921	-67.5948	-66.4076	-67.7781
29.3	-66.2383	-65.9121	-67.1606	-67.562	-67.4662	-66.4083	-67.7552
29.35	-66.3843	-65.8926	-67.1332	-67.4403	-67.2754	-66.3389	-67.6854
29.4	-66.5342	-65.9837	-67.0658	-67.2969	-67.173	-66.2202	-67.5756
29.45	-66.7155	-66.102	-67.033	-67.1126	-67.1606	-66.1371	-67.4494
29.5	-66.87	-66.2244	-67.0797	-66.9963	-67.1502	-66.132	-67.3083
29.55	-66.877	-66.339	-67.1798	-67.0747	-67.1	-66.1685	-67.1693
29.6	-66.718	-66.4063	-67.2738	-67.2958	-67.0228	-66.2001	-67.0593
29.65	-66.4948	-66.387	-67.3281	-67.4689	-66.9687	-66.2442	-66.9793
29.7	-66.3106	-66.3031	-67.3328	-67.5089	-67.0148	-66.3129	-66.9103
29.75	-66.2169	-66.2344	-67.3132	-67.4956	-67.1578	-66.3474	-66.8462
29.8	-66.2427	-66.2262	-67.3357	-67.4992	-67.309	-66.311	-66.8154
29.85	-66.3613	-66.2806	-67.4216	-67.4925	-67.3932	-66.2696	-66.8625
29.9	-66.475	-66.3625	-67.5229	-67.4104	-67.4257	-66.2854	-66.9714
29.95	-66.4967	-66.419	-67.5528	-67.2693	-67.4674	-66.3395	-67.0743
30	-66.4466	-66.4093	-67.4682	-67.1561	-67.5337	-66.4311	-67.1558
30.05	-66.4016	-66.3324	-67.3325	-67.1274	-67.5767	-66.6189	-67.2376
30.1	-66.3831	-66.2417	-67.2577	-67.1829	-67.573	-66.883	-67.3175
30.15	-66.3838	-66.201	-67.3012	-67.2947	-67.5477	-67.0705	-67.3885
30.2	-66.4232	-66.2376	-67.4146	-67.4017	-67.5161	-67.1008	-67.4594
30.25	-66.4904	-66.3067	-67.5031	-67.4245	-67.501	-67.059	-67.5113
30.3	-66.4867	-66.3246	-67.4935	-67.3451	-67.571	-67.027	-67.4892
30.35	-66.3517	-66.2635	-67.398	-67.2073	-67.7227	-66.9974	-67.3541
30.4	-66.1603	-66.1837	-67.3198	-67.0606	-67.8209	-66.9861	-67.1482
30.45	-66.0268	-66.1767	-67.3166	-66.9325	-67.771	-67.0336	-66.9786
30.5	-65.9977	-66.2602	-67.3517	-66.8575	-67.6581	-67.1057	-66.9222
30.55	-66.0428	-66.3671	-67.3676	-66.8635	-67.6081	-67.1034	-66.9721
30.6	-66.1139	-66.4062	-67.3621	-66.9386	-67.6097	-67.018	-67.0596
30.65	-66.1652	-66.3505	-67.379	-67.0047	-67.5939	-66.9451	-67.135
30.7	-66.1786	-66.264	-67.3869	-66.988	-67.5711	-66.9278	-67.1827
30.75	-66.1913	-66.2048	-67.311	-66.9066	-67.5689	-66.9028	-67.1951
30.8	-66.2621	-66.1717	-67.1724	-66.8595	-67.557	-66.8498	-67.1624
30.85	-66.4028	-66.1325	-67.0968	-66.8973	-67.5236	-66.8643	-67.1045
30.9	-66.5274	-66.0845	-67.1555	-66.9633	-67.5231	-67.0046	-67.0514
30.95	-66.5704	-66.0669	-67.26	-66.9641	-67.5523	-67.1795	-67.0137
31	-66.5783	-66.0996	-67.3382	-66.8895	-67.5105	-67.2702	-66.9947
31.05	-66.6058	-66.1361	-67.4262	-66.7999	-67.3704	-67.2694	-67.0124
31.1	-66.6297	-66.0903	-67.5039	-66.7475	-67.2546	-67.2387	-67.0819
31.15	-66.5912	-65.9816	-67.4841	-66.7592	-67.2633	-67.2348	-67.15
31.2	-66.4867	-65.93	-67.3446	-66.8353	-67.3551	-67.2541	-67.1556
31.25	-66.359	-65.9707	-67.1757	-66.8923	-67.4361	-67.2263	-67.1185
31.3	-66.2516	-66.0284	-67.0767	-66.8355	-67.4932	-67.0804	-67.0929
31.35	-66.2018	-66.0356	-67.0316	-66.7224	-67.5481	-66.8506	-67.0812
31.4	-66.2092	-66.0113	-66.9867	-66.71	-67.5683	-66.6731	-67.0655
31.45	-66.2429	-65.997	-66.9448	-66.8172	-67.5058	-66.6516	-67.0866
31.5	-66.2526	-65.9902	-66.9232	-66.9034	-67.3756	-66.7511	-67.1676
31.55	-66.2204	-66.0018	-66.934	-66.9026	-67.228	-66.8432	-67.25
31.6	-66.202	-66.0266	-66.9645	-66.9028	-67.103	-66.8855	-67.2779
31.65	-66.2301	-66.0245	-67.001	-66.9786	-67.0093	-66.9316	-67.2907
31.7	-66.2667	-65.9978	-67.0524	-67.0854	-66.9388	-66.9833	-67.3771
31.75	-66.2538	-65.969	-67.0489	-67.1651	-66.8817	-66.97	-67.5162
31.8	-66.182	-65.9589	-66.9155	-67.2255	-66.837	-66.8923	-67.5896
31.85	-66.0849	-65.9695	-66.7212	-67.2973	-66.7983	-66.8529	-67.5492
31.9	-65.9585	-65.9856	-66.6166	-67.3607	-66.7783	-66.9172	-67.4587
31.95	-65.8271	-66.0305	-66.6592	-67.3919	-66.7966	-67.0518	-67.353
32	-65.7916	-66.1035	-66.7567	-67.4017	-66.8056	-67.1758	-67.2283
32.05	-65.8714	-66.1579	-66.7981	-67.3923	-66.749	-67.2187	-67.162
32.1	-65.9452	-66.1768	-66.796	-67.3574	-66.682	-67.1158	-67.2057
32.15	-65.8964	-66.1848	-66.8245	-67.3603	-66.7128	-66.8729	-67.2621
32.2	-65.7725	-66.2417	-66.8912	-67.4856	-66.8436	-66.6401	-67.2094
32.25	-65.7135	-66.3207	-66.9369	-67.6817	-66.9774	-66.6049	-67.0641
32.3	-65.736	-66.2966	-66.9384	-67.7986	-67.0404	-66.7801	-66.9576
32.35	-65.7776	-66.129	-66.8928	-67.7894	-67.0572	-66.9633	-66.9817
32.4	-65.8459	-65.9335	-66.8125	-67.7532	-67.0797	-66.984	-67.1195
32.45	-65.9878	-65.8187	-66.7775	-67.7442	-67.0865	-66.844	-67.2683
32.5	-66.2056	-65.779	-66.881	-67.7052	-67.0074	-66.6305	-67.3467
32.55	-66.4069	-65.7652	-67.0822	-67.6046	-66.886	-66.4661	-67.3516
32.6	-66.5006	-65.7815	-67.2086	-67.4834	-66.8802	-66.4617	-67.3035
32.65	-66.4913	-65.8519	-67.1481	-67.35	-67.0358	-66.6115	-67.2376
32.7	-66.4421	-65.9652	-66.9535	-67.1948	-67.2253	-66.7559	-67.2062
32.75	-66.3754	-66.0994	-66.7837	-67.0899	-67.3312	-66.7654	-67.2592
32.8	-66.2589	-66.2614	-66.7653	-67.1289	-67.3643	-66.6908	-67.3911
32.85	-66.0909	-66.4177	-66.91	-67.28	-67.3417	-66.6664	-67.514
32.9	-65.9515	-66.463	-67.1297	-67.4192	-67.2304	-66.735	-67.5813
32.95	-65.9011	-66.3871	-67.2882	-67.5312	-67.0517	-66.7875	-67.6128
33	-65.9066	-66.3282	-67.2926	-67.6712	-66.9278	-66.7445	-67.627
33.05	-65.9348	-66.3972	-67.1627	-67.7718	-66.9614	-66.6777	-67.6513
33.1	-65.9937	-66.5122	-67.041	-67.6821	-67.1468	-66.6814	-67.6827
33.15	-66.0743	-66.507	-67.0326	-67.4058	-67.4115	-66.7466	-67.6766
33.2	-66.1633	-66.3513	-67.066	-67.1485	-67.6247	-66.7738	-67.6084
33.25	-66.31	-66.1629	-67.0519	-67.0915	-67.6548	-66.7107	-67.5024
33.3	-66.5285	-66.0951	-67.0384	-67.2295	-67.4817	-66.6011	-67.4174
33.35	-66.6765	-66.2057	-67.1136	-67.4236	-67.2488	-66.511	-67.3662
33.4	-66.5951	-66.402	-67.2459	-67.5747	-67.1459	-66.4741	-67.3322
33.45	-66.3355	-66.5297	-67.3482	-67.6484	-67.2224	-66.4631	-67.3448
33.5	-66.1429	-66.5103	-67.3906	-67.6073	-67.3885	-66.443	-67.4027
33.55	-66.1547	-66.4233	-67.3356	-67.4537	-67.5337	-66.4102	-67.4479
33.6	-66.244	-66.3839	-67.1462	-67.2726	-67.6023	-66.3903	-67.4301
33.65	-66.2183	-66.3847	-66.8981	-67.1609	-67.5608	-66.426	-67.3867
33.7	-66.0491	-66.3296	-66.7588	-67.1477	-67.4074	-66.4867	-67.4039
33.75	-65.8879	-66.1901	-66.7807	-67.2253	-67.235	-66.498	-67.4547
33.8	-65.8602	-66.0671	-66.8543	-67.3363	-67.1723	-66.4578	-67.4219
33.85	-65.9498	-66.0314	-66.894	-67.3831	-67.2368	-66.4512	-67.3092
33.9	-66.0908	-66.0558	-66.9549	-67.3515	-67.3007	-66.5424	-67.2391
33.95	-66.2096	-66.1103	-67.0961	-67.348	-67.3067	-66.6393	-67.2427
34	-66.2263	-66.1816	-67.2534	-67.453	-67.3501	-66.6199	-67.2131
34.05	-66.15	-66.2089	-67.3342	-67.579	-67.48	-66.5254	-67.1063
34.1	-66.1341	-66.1297	-67.3605	-67.5777	-67.6233	-66.4641	-67.031
34.15	-66.2685	-66.0151	-67.4012	-67.4068	-67.6817	-66.4692	-67.0915
34.2	-66.4265	-65.9646	-67.4512	-67.1646	-67.6221	-66.5081	-67.2666
34.25	-66.4533	-65.9661	-67.4572	-66.9893	-67.474	-66.5755	-67.4936
34.3	-66.3304	-65.9775	-67.4032	-66.9334	-67.3181	-66.7051	-67.7108
34.35	-66.1566	-66.0162	-67.3114	-66.9762	-67.2764	-66.8295	-67.8263
34.4	-66.0411	-66.0901	-67.2299	-67.075	-67.3919	-66.845	-67.7997
34.45	-66.046	-66.1709	-67.2267	-67.1854	-67.5796	-66.8048	-67.71
34.5	-66.1474	-66.24	-67.3401	-67.2886	-67.7126	-66.8201	-67.6753
34.55	-66.2621	-66.3017	-67.526	-67.391	-67.7522	-66.8994	-67.694
34.6	-66.3414	-66.3452	-67.6913	-67.4921	-67.7599	-66.9676	-67.6644
34.65	-66.411	-66.3474	-67.7903	-67.5129	-67.7535	-66.9567	-67.5577
34.7	-66.5022	-66.2958	-67.8349	-67.3977	-67.6969	-66.9089	-67.4351
34.75	-66.5946	-66.1995	-67.7995	-67.2481	-67.5913	-66.8914	-67.3742
34.8	-66.6507	-66.1061	-67.6645	-67.1886	-67.493	-66.8816	-67.4112
34.85	-66.6445	-66.073	-67.5255	-67.2053	-67.4568	-66.8576	-67.4961
34.9	-66.5573	-66.0899	-67.4909	-67.2085	-67.476	-66.8283	-67.5061
34.95	-66.3919	-66.1201	-67.5133	-67.2097	-67.5314	-66.7813	-67.3578
35	-66.1977	-66.1621	-67.5044	-67.3025	-67.6161	-66.6828	-67.1601
35.05	-66.0398	-66.202	-67.4737	-67.4552	-67.7021	-66.5543	-67.0956
35.1	-65.946	-66.2052	-67.4683	-67.5237	-67.7521	-66.4724	-67.1707
35.15	-65.8891	-66.1991	-67.4654	-67.4427	-67.7706	-66.4447	-67.2222
35.2	-65.8603	-66.234	-67.416	-67.3194	-67.7677	-66.3991	-67.1282
35.25	-65.8993	-66.2873	-67.3213	-67.2838	-67.7215	-66.3294	-66.9855
35.3	-66.0019	-66.3138	-67.233	-67.2953	-67.6413	-66.3069	-66.9711
35.35	-66.0541	-66.3333	-67.168	-67.2777	-67.5688	-66.3818	-67.0986
35.4	-65.9658	-66.3927	-67.093	-67.2678	-67.4949	-66.5505	-67.2459
35.45	-65.8003	-66.4971	-66.9925	-67.2989	-67.354	-66.7993	-67.3438
35.5	-65.7063	-66.5722	-66.9196	-67.31	-67.1721	-67.0698	-67.4196
35.55	-65.7416	-66.5286	-66.9246	-67.2478	-67.0991	-67.2406	-67.4479
35.6	-65.8537	-66.3821	-66.9723	-67.2063	-67.2185	-67.2195	-67.3585
35.65	-65.9605	-66.251	-66.9536	-67.294	-67.4151	-67.0388	-67.1655
35.7	-65.9784	-66.2136	-66.8074	-67.4085	-67.5088	-66.8253	-66.9766
35.75	-65.8644	-66.2552	-66.6152	-67.407	-67.4906	-66.6529	-66.8788
35.8	-65.7019	-66.3328	-66.5263	-67.3297	-67.4684	-66.5165	-66.8885
35.85	-65.6189	-66.426	-66.5748	-67.2715	-67.4642	-66.4441	-66.9673
35.9	-65.6376	-66.4887	-66.6727	-67.2302	-67.4304	-66.5075	-67.0787
35.95	-65.6912	-66.4607	-66.7631	-67.1608	-67.3901	-66.6749	-67.212
36	-65.7453	-66.3558	-66.8461	-67.1281	-67.4358	-66.8063	-67.3747
36.05	-65.8106	-66.2525	-66.9184	-67.2388	-67.544	-66.8669	-67.5481
36.1	-65.8757	-66.1602	-66.9815	-67.4146	-67.5632	-66.9334	-67.6601
36.15	-65.905	-66.0535	-67.0483	-67.5102	-67.4344	-67.0318	-67.6365
36.2	-65.9099	-65.9878	-67.0911	-67.5051	-67.2698	-67.0942	-67.4886
36.25	-65.9367	-66.0356	-67.075	-67.4332	-67.224	-67.0659	-67.305
36.3	-65.9894	-66.131	-67.0242	-67.3536	-67.2963	-66.9847	-67.1777
36.35	-66.0179	-66.1443	-66.999	-67.3171	-67.3364	-66.9078	-67.1395
36.4	-65.9895	-66.0478	-66.9667	-67.3138	-67.2978	-66.8577	-67.1635
36.45	-65.9223	-65.9155	-66.8436	-67.3586	-67.2559	-66.8402	-67.2047
36.5	-65.8654	-65.793	-66.6843	-67.4358	-67.2457	-66.8921	-67.2293
36.55	-65.8733	-65.7074	-66.651	-67.4353	-67.2357	-67.0222	-67.1859
36.6	-65.9337	-65.7336	-66.7799	-67.3605	-67.1873	-67.1649	-67.0334
36.65	-65.9766	-65.9061	-66.9592	-67.336	-67.1286	-67.2772	-66.8459
36.7	-65.9914	-66.1112	-67.1131	-67.372	-67.1097	-67.3575	-66.7798
36.75	-66.0354	-66.2179	-67.2217	-67.3727	-67.1308	-67.3655	-66.8863
36.8	-66.1008	-66.2603	-67.236	-67.3178	-67.1637	-67.2531	-67.0404
36.85	-66.1292	-66.358	-67.1163	-67.3179	-67.184	-67.0704	-67.0952
36.9	-66.1206	-66.5176	-66.9416	-67.4234	-67.1927	-66.8951	-67.0617
36.95	-66.1141	-66.6223	-66.8284	-67.4842	-67.1881	-66.741	-67.0688
37	-66.0906	-66.6183	-66.7648	-67.4102	-67.1788	-66.6142	-67.1461
37.05	-66.0126	-66.5656	-66.6604	-67.3355	-67.176	-66.5871	-67.1927
37.1	-65.8807	-66.508	-66.532	-67.3691	-67.1563	-66.7021	-67.1849
37.15	-65.7274	-66.4027	-66.4962	-67.4658	-67.1094	-66.8827	-67.2055
37.2	-65.5717	-66.2314	-66.5922	-67.5582	-67.1066	-67.0034	-67.2633
37.25	-65.4242	-66.0627	-66.7485	-67.6375	-67.2243	-67.0335	-67.2837
37.3	-65.3346	-65.9812	-66.8842	-67.6776	-67.4058	-67.0217	-67.2602
37.35	-65.3847	-66.002	-66.983	-67.6389	-67.4999	-66.9848	-67.2552
37.4	-65.5808	-66.0849	-67.0165	-67.5545	-67.4269	-66.9004	-67.272
37.45	-65.813	-66.2015	-66.9294	-67.5069	-67.2515	-66.8029	-67.2599
37.5	-65.9807	-66.3467	-66.7674	-67.516	-67.0784	-66.769	-67.2397
37.55	-66.0641	-66.5009	-66.6811	-67.5336	-66.9717	-66.8264	-67.281
37.6	-66.0717	-66.5936	-66.7322	-67.5304	-66.9452	-66.9348	-67.3754
37.65	-66.0038	-66.5845	-66.804	-67.5024	-67.0005	-67.0632	-67.4456
37.7	-65.9082	-66.5096	-66.8189	-67.4312	-67.1119	-67.1914	-67.4793
37.75	-65.8394	-66.4273	-66.852	-67.3052	-67.2255	-67.2601	-67.5216
37.8	-65.7642	-66.369	-66.9572	-67.1934	-67.3094	-67.207	-67.5652
37.85	-65.6445	-66.3379	-67.0658	-67.1994	-67.3626	-67.066	-67.5483
37.9	-65.5648	-66.3383	-67.1022	-67.3525	-67.3788	-66.9322	-67.4701
37.95	-65.6471	-66.3868	-67.1031	-67.5843	-67.3702	-66.8623	-67.385
38	-65.8577	-66.4911	-67.1036	-67.8058	-67.3764	-66.8513	-67.3104
38.05	-66.0394	-66.5782	-67.0505	-67.9428	-67.4286	-66.8768	-67.1998
38.1	-66.1103	-66.5485	-66.9612	-67.9085	-67.503	-66.8983	-67.0507
38.15	-66.1253	-66.4077	-66.9986	-67.6562	-67.5452	-66.8586	-66.9395
38.2	-66.1079	-66.2861	-67.2153	-67.2738	-67.545	-66.7443	-66.9058
38.25	-66.0266	-66.291	-67.3959	-66.986	-67.5365	-66.6259	-66.9221
38.3	-65.9477	-66.3769	-67.3775	-66.9596	-67.5212	-66.5766	-66.9803
38.35	-66.0018	-66.453	-67.2589	-67.1591	-67.451	-66.604	-67.0808
38.4	-66.1764	-66.5046	-67.1912	-67.4192	-67.3291	-66.6828	-67.1888
38.45	-66.3071	-66.5324	-67.1986	-67.6083	-67.2287	-66.7855	-67.301
38.5	-66.3203	-66.4596	-67.2228	-67.6819	-67.1912	-66.8733	-67.461
38.55	-66.2711	-66.2481	-67.2359	-67.6253	-67.1581	-66.922	-67.6615
38.6	-66.1959	-66.035	-67.2183	-67.4831	-67.076	-66.9371	-67.7943
38.65	-66.1194	-65.987	-67.1519	-67.3464	-66.9907	-66.9183	-67.7769
38.7	-66.131	-66.0899	-67.087	-67.2751	-66.943	-66.869	-67.6506
38.75	-66.2982	-66.1549	-67.0658	-67.2754	-66.8841	-66.8229	-67.5097
38.8	-66.5129	-66.0595	-67.0636	-67.327	-66.7998	-66.8402	-67.3819
38.85	-66.5987	-65.8872	-67.0587	-67.373	-66.7623	-66.947	-67.2402
38.9	-66.5045	-65.7971	-67.0899	-67.356	-66.8252	-67.1051	-67.1019
38.95	-66.3293	-65.8752	-67.1817	-67.3007	-66.9532	-67.2364	-67.0424
39	-66.2207	-66.073	-67.2407	-67.3213	-67.0779	-67.2771	-67.0847
39.05	-66.2465	-66.2853	-67.1693	-67.4644	-67.1655	-67.2111	-67.1651
39.1	-66.3576	-66.4364	-67.0038	-67.6249	-67.2257	-67.0817	-67.2588
39.15	-66.4342	-66.4998	-66.8771	-67.6948	-67.2499	-66.9424	-67.3806
39.2	-66.4011	-66.4907	-66.8704	-67.7089	-67.2336	-66.814	-67.4944
39.25	-66.2939	-66.4092	-66.9259	-67.7227	-67.2246	-66.68	-67.5095
39.3	-66.2149	-66.2505	-66.9832	-67.7029	-67.2585	-66.5375	-67.3921
39.35	-66.2386	-66.0646	-67.0484	-67.6176	-67.2937	-66.4251	-67.2181
39.4	-66.3121	-65.9624	-67.0828	-67.5087	-67.2879	-66.3748	-67.0723
39.45	-66.3279	-66.0155	-67.024	-67.4137	-67.2394	-66.3742	-66.9722
39.5	-66.2726	-66.129	-66.8927	-67.3287	-67.1328	-66.425	-66.9301
39.55	-66.223	-66.1828	-66.7957	-67.2495	-66.9532	-66.5775	-66.9804
39.6	-66.2388	-66.196	-66.7814	-67.1902	-66.79	-66.7813	-67.0905
39.65	-66.3056	-66.2477	-66.7734	-67.1466	-66.7754	-66.8766	-67.1961
39.7	-66.3967	-66.3457	-66.7429	-67.1003	-66.9124	-66.8081	-67.2823
39.75	-66.4831	-66.3974	-66.7478	-67.0637	-67.0906	-66.6968	-67.3565
39.8	-66.5213	-66.3568	-66.8003	-67.0751	-67.2391	-66.6273	-67.3912
39.85	-66.5098	-66.3077	-66.878	-67.1443	-67.3539	-66.5721	-67.3554
39.9	-66.4817	-66.3154	-66.9631	-67.2366	-67.4181	-66.552	-67.2998
39.95	-66.4478	-66.3463	-67.061	-67.3141	-67.412	-66.6753	-67.2824
40	-66.3604	-66.3524	-67.1925	-67.362	-67.393	-66.9485	-67.2849
40.05	-66.2077	-66.3627	-67.3053	-67.3782	-67.4604	-67.181	-67.2809
40.1	-66.0903	-66.3945	-67.3116	-67.3522	-67.6006	-67.2195	-67.3144
40.15	-66.0774	-66.3705	-67.1829	-67.2991	-67.6827	-67.1126	-67.4268
40.2	-66.1311	-66.2733	-66.9684	-67.271	-67.6452	-66.9783	-67.5328
40.25	-66.1873	-66.188	-66.7699	-67.3118	-67.5741	-66.8579	-67.5141
40.3	-66.2377	-66.1607	-66.6833	-67.3814	-67.5268	-66.7824	-67.3586
40.35	-66.3176	-66.1559	-66.7363	-67.3893	-67.4598	-66.8206	-67.1462
40.4	-66.3842	-66.0951	-66.849	-67.3054	-67.3427	-66.9727	-66.9737
40.45	-66.3703	-65.9814	-66.8993	-67.2152	-67.2037	-67.1367	-66.898
40.5	-66.3107	-65.9202	-66.8607	-67.2106	-67.0612	-67.1919	-66.9072
40.55	-66.2403	-65.954	-66.8126	-67.2527	-66.9364	-67.1169	-66.929
40.6	-66.1459	-66.024	-66.8188	-67.2106	-66.8764	-66.9663	-66.9126
40.65	-66.0302	-66.0826	-66.8217	-67.0438	-66.9054	-66.7951	-66.8566
40.7	-65.9318	-66.1403	-66.7503	-66.8745	-67.0017	-66.6981	-66.7918
40.75	-65.9132	-66.1503	-66.6712	-66.8345	-67.141	-66.7886	-66.8024
40.8	-65.9435	-66.0503	-66.7001	-66.9225	-67.3279	-67.0331	-66.9261
40.85	-65.9157	-65.9339	-66.8289	-67.0522	-67.5234	-67.2176	-67.0718
40.9	-65.7882	-65.9429	-66.9567	-67.1863	-67.6269	-67.211	-67.1397
40.95	-65.6403	-66.0354	-67.0164	-67.2903	-67.5789	-67.0843	-67.1598
41	-65.5567	-66.0594	-66.9758	-67.3002	-67.4493	-66.9629	-67.2109
41.05	-65.5081	-65.9874	-66.8432	-67.2165	-67.3622	-66.9188	-67.2441
41.1	-65.4188	-65.9139	-66.6951	-67.1058	-67.3651	-66.9446	-67.1762
41.15	-65.3249	-65.8869	-66.645	-66.9681	-67.4253	-66.9916	-67.0632
41.2	-65.3195	-65.8845	-66.7233	-66.7701	-67.4963	-66.9995	-67.0301
41.25	-65.4306	-65.9419	-66.8067	-66.611	-67.5324	-66.9604	-67.094
41.3	-65.602	-66.0873	-66.7648	-66.6409	-67.4917	-66.9634	-67.1329
41.35	-65.7694	-66.2083	-66.6366	-66.8381	-67.4056	-67.0603	-67.0741
41.4	-65.8977	-66.1837	-66.5956	-67.0205	-67.3466	-67.1639	-66.984
41.45	-65.9528	-66.0427	-66.7045	-67.0896	-67.3342	-67.1503	-66.9238
41.5	-65.9149	-65.9476	-66.8187	-67.1013	-67.3174	-67.0296	-66.9047
41.55	-65.8084	-66.0047	-66.7882	-67.1033	-67.2489	-66.9261	-66.9325
41.6	-65.6979	-66.151	-66.6156	-67.0732	-67.1678	-66.8961	-67.0103
41.65	-65.6246	-66.2766	-66.4372	-67.0503	-67.1539	-66.8926	-67.0887
41.7	-65.6132	-66.3561	-66.3879	-67.1543	-67.235	-66.8668	-67.0685
41.75	-65.7022	-66.4433	-66.5091	-67.3767	-67.355	-66.8416	-66.9736
41.8	-65.8677	-66.5506	-66.7346	-67.5512	-67.4394	-66.8488	-66.9563
41.85	-65.9805	-66.6053	-66.9134	-67.5774	-67.4468	-66.8783	-67.0442
41.9	-65.9465	-66.5486	-66.914	-67.5276	-67.3772	-66.9273	-67.1221
41.95	-65.8635	-66.4075	-66.7247	-67.461	-67.2694	-66.9668	-67.1181
42	-65.8723	-66.271	-66.4726	-67.3507	-67.1821	-66.9605	-67.0756
42.05	-65.938	-66.2082	-66.2982	-67.2492	-67.1659	-66.9434	-67.0212
42.1	-65.941	-66.2489	-66.2749	-67.2636	-67.1817	-66.9363	-66.9147
42.15	-65.8652	-66.3618	-66.3956	-67.37	-67.1294	-66.8924	-66.7627
42.2	-65.8124	-66.4457	-66.5762	-67.4238	-66.9953	-66.765	-66.6543
42.25	-65.8292	-66.4501	-66.7125	-67.3875	-66.9069	-66.6031	-66.6345
42.3	-65.8406	-66.4283	-66.7591	-67.3732	-66.99	-66.5363	-66.6569
42.35	-65.7874	-66.4663	-66.749	-67.4397	-67.1532	-66.5949	-66.6839
42.4	-65.6904	-66.5655	-66.7564	-67.5101	-67.1991	-66.6812	-66.7617
42.45	-65.6159	-66.6519	-66.7939	-67.4935	-67.088	-66.7262	-66.9024
42.5	-65.6197	-66.6777	-66.8046	-67.4202	-66.9631	-66.7689	-67.0174
42.55	-65.738	-66.6615	-66.7802	-67.3579	-66.9613	-66.8656	-67.0504
42.6	-65.9346	-66.6403	-66.7971	-67.2913	-67.0574	-66.9569	-67.0488
42.65	-66.0295	-66.6293	-66.8949	-67.203	-67.1708	-66.9603	-67.0407
42.7	-65.8776	-66.6233	-67.0214	-67.1462	-67.2799	-66.8928	-66.9758
42.75	-65.584	-66.5861	-67.1141	-67.1661	-67.367	-66.8042	-66.8795
42.8	-65.4167	-66.4809	-67.1479	-67.1915	-67.4038	-66.756	-66.8675
42.85	-65.4758	-66.3401	-67.1093	-67.1633	-67.3862	-66.7886	-66.9907
42.9	-65.6234	-66.2465	-67.0166	-67.1566	-67.3446	-66.8484	-67.1706
42.95	-65.7471	-66.2065	-66.9477	-67.2193	-67.2714	-66.8858	-67.2876
43	-65.8859	-66.1387	-66.9703	-67.2683	-67.1296	-66.9095	-67.3048
43.05	-66.0446	-66.0107	-67.069	-67.2111	-66.98	-66.9262	-67.246
43.1	-66.151	-65.9194	-67.1818	-67.0891	-66.9314	-66.9405	-67.1572
43.15	-66.2086	-65.9556	-67.264	-67.0368	-66.9944	-66.949	-67.1072
43.2	-66.2904	-66.074	-67.3026	-67.1051	-67.0464	-66.9739	-67.1365
43.25	-66.3781	-66.1548	-67.2645	-67.2149	-66.9936	-67.0525	-67.2033
43.3	-66.3671	-66.132	-67.1207	-67.2487	-66.8859	-67.1571	-67.2143
43.35	-66.2441	-66.0116	-66.9476	-67.1916	-66.8052	-67.2207	-67.1766
43.4	-66.1262	-65.8566	-66.8849	-67.1479	-66.7787	-67.201	-67.1797
43.45	-66.0945	-65.7602	-66.9487	-67.1724	-66.8355	-67.1162	-67.2255
43.5	-66.1116	-65.7639	-67.0345	-67.2107	-66.9732	-67.0296	-67.2432
43.55	-66.1251	-65.8189	-67.0879	-67.1817	-67.0707	-67.0169	-67.2117
43.6	-66.1366	-65.8845	-67.1446	-67.0936	-66.991	-67.0802	-67.1894
43.65	-66.131	-65.9688	-67.1956	-67.0446	-66.8067	-67.1109	-67.2102
43.7	-66.0359	-66.042	-67.1758	-67.0589	-66.7416	-67.0323	-67.2501
43.75	-65.8681	-66.0104	-67.0845	-67.0793	-66.8848	-66.9347	-67.2798
43.8	-65.781	-65.8767	-67.0258	-67.0986	-67.0996	-66.9562	-67.2726
43.85	-65.8639	-65.7925	-67.0769	-67.1609	-67.2384	-67.0633	-67.204
43.9	-66.0331	-65.857	-67.1867	-67.2702	-67.315	-67.0792	-67.0675
43.95	-66.1907	-65.9767	-67.2444	-67.3501	-67.4005	-66.9121	-66.9171
44	-66.3202	-66.0314	-67.2042	-67.3636	-67.4954	-66.6996	-66.8145
44.05	-66.4054	-66.0324	-67.0866	-67.3568	-67.562	-66.6463	-66.756
44.1	-66.4042	-66.0575	-66.9416	-67.3524	-67.5931	-66.7923	-66.7001
44.15	-66.3245	-66.0942	-66.8205	-67.3508	-67.5828	-67.0221	-66.6572
44.2	-66.2119	-66.0556	-66.756	-67.3394	-67.4955	-67.1947	-66.6653
44.25	-66.0963	-65.9395	-66.7457	-67.2647	-67.3792	-67.205	-66.7265
44.3	-66.0015	-65.8628	-66.7613	-67.1081	-67.3538	-67.0239	-66.8119
44.35	-65.9683	-65.9103	-66.7683	-66.9054	-67.4326	-66.7806	-66.9165
44.4	-66.0083	-66.0455	-66.736	-66.7386	-67.5002	-66.6691	-67.037
44.45	-66.0797	-66.1633	-66.6636	-66.7098	-67.4945	-66.7256	-67.1411
44.5	-66.1402	-66.1718	-66.5937	-66.8171	-67.4924	-66.8169	-67.2088
44.55	-66.2045	-66.0754	-66.5977	-66.9725	-67.5264	-66.8475	-67.2837
44.6	-66.3123	-65.9985	-66.7121	-67.1064	-67.5193	-66.8843	-67.3977
44.65	-66.4325	-66.0571	-66.8807	-67.1544	-67.4637	-66.9706	-67.4915
44.7	-66.4805	-66.2267	-66.987	-67.1282	-67.444	-67.0159	-67.4873
44.75	-66.4352	-66.3998	-67.0161	-67.1064	-67.4849	-66.9443	-67.4194
44.8	-66.3734	-66.509	-67.0593	-67.094	-67.4789	-66.81	-67.3747
44.85	-66.3613	-66.5777	-67.1377	-67.083	-67.3533	-66.73	-67.3491
44.9	-66.374	-66.6574	-67.1641	-67.0884	-67.2207	-66.7443	-67.3042
44.95	-66.3563	-66.7268	-67.091	-67.074	-67.1877	-66.8187	-67.2987
45	-66.3307	-66.6824	-66.9606	-67.0284	-67.2287	-66.8896	-67.3807
45.05	-66.357	-66.4994	-66.8281	-66.9935	-67.2919	-66.8858	-67.4605
45.1	-66.4396	-66.2905	-66.7201	-66.9903	-67.3368	-66.7941	-67.4384
45.15	-66.5489	-66.1511	-66.6636	-67.0019	-67.3343	-66.7201	-67.3702
45.2	-66.6635	-66.0529	-66.6829	-66.9554	-67.276	-66.7607	-67.3557
45.25	-66.7185	-65.9378	-66.7445	-66.8243	-67.2037	-66.8674	-67.3807
45.3	-66.6486	-65.8057	-66.8114	-66.7105	-67.1838	-66.9379	-67.3682
45.35	-66.4825	-65.6942	-66.872	-66.6477	-67.2501	-66.9788	-67.3195
45.4	-66.2985	-65.6299	-66.9156	-66.5583	-67.3953	-67.0615	-67.3028
45.45	-66.0985	-65.6414	-66.9332	-66.4463	-67.5702	-67.1761	-67.3266
45.5	-65.8684	-65.7825	-66.955	-66.4179	-67.6933	-67.2465	-67.3037
45.55	-65.697	-66.0411	-67.0212	-66.5208	-67.6881	-67.2848	-67.1854
45.6	-65.6712	-66.2964	-67.1197	-66.6883	-67.5589	-67.3718	-67.0456
45.65	-65.7515	-66.4126	-67.1978	-66.8422	-67.3897	-67.4841	-66.9979
45.7	-65.8897	-66.3627	-67.2184	-66.9654	-67.2668	-67.5091	-67.0245
45.75	-66.1211	-66.2191	-67.1835	-67.0734	-67.1905	-67.4366	-66.9941
45.8	-66.4249	-66.0478	-67.0829	-67.1477	-67.1138	-67.3715	-66.8466
45.85	-66.6663	-65.8504	-66.9121	-67.135	-67.0445	-67.3613	-66.6589
45.9	-66.7217	-65.6575	-66.7306	-67.0422	-67.0544	-67.3255	-66.5107
45.95	-66.6058	-65.5893	-66.63	-66.9341	-67.1503	-67.2082	-66.4306
46	-66.4219	-65.7019	-66.6512	-66.8624	-67.2375	-67.0747	-66.4415
46.05	-66.2475	-65.903	-66.732	-66.8521	-67.2373	-67.0171	-66.5399
46.1	-66.0929	-66.0752	-66.7769	-66.918	-67.1934	-67.0413	-66.6322
46.15	-65.9557	-66.186	-66.7405	-67.0463	-67.2117	-67.1	-66.6246
46.2	-65.8584	-66.1964	-66.6425	-67.1924	-67.3125	-67.1536	-66.5358
46.25	-65.8151	-66.0696	-66.5241	-67.3137	-67.3943	-67.1865	-66.4484
46.3	-65.7993	-65.8854	-66.4138	-67.3957	-67.3727	-67.198	-66.3937
46.35	-65.7781	-65.7662	-66.3373	-67.4458	-67.2727	-67.2188	-66.3604
46.4	-65.7703	-65.7378	-66.3074	-67.4257	-67.1599	-67.2521	-66.3745
46.45	-65.7999	-65.7654	-66.3253	-67.2949	-67.0809	-67.2435	-66.4748
46.5	-65.8475	-65.8533	-66.354	-67.1356	-67.0698	-67.1672	-66.6222
46.55	-65.8692	-65.9855	-66.3616	-67.1087	-67.1102	-67.0824	-66.7213
46.6	-65.8586	-66.0769	-66.4088	-67.2171	-67.1185	-67.0372	-66.7681
46.65	-65.8474	-66.07	-66.5621	-67.2887	-67.0455	-67.0054	-66.8293
46.7	-65.8656	-66.0365	-66.7683	-67.2274	-66.9406	-66.9333	-66.9074
46.75	-65.9361	-66.1028	-66.8989	-67.0762	-66.9025	-66.8307	-66.9451
46.8	-66.0332	-66.2705	-66.9248	-66.9092	-66.9522	-66.7436	-66.9355
46.85	-66.089	-66.4132	-66.9305	-66.7783	-67.0074	-66.6807	-66.8985
46.9	-66.0581	-66.4448	-66.9425	-66.75	-66.9944	-66.6524	-66.8159
46.95	-65.9528	-66.4214	-66.9071	-66.8608	-66.9377	-66.7077	-66.6999
47	-65.8299	-66.4115	-66.8072	-67.0399	-66.8864	-66.8542	-66.6679
47.05	-65.7687	-66.3871	-66.7289	-67.1708	-66.8465	-66.9995	-66.8334
47.1	-65.8009	-66.336	-66.7494	-67.234	-66.8122	-67.0369	-67.1252
47.15	-65.8482	-66.2933	-66.8395	-67.2951	-66.8039	-66.9713	-67.341
47.2	-65.8357	-66.264	-66.9518	-67.3726	-66.8254	-66.9251	-67.3812
47.25	-65.7808	-66.2082	-67.0569	-67.4076	-66.8516	-66.9719	-67.3074
47.3	-65.7308	-66.1293	-67.0975	-67.3613	-66.8508	-67.0458	-67.173
47.35	-65.7143	-66.1043	-67.0251	-67.2793	-66.8106	-67.0504	-66.9944
47.4	-65.7583	-66.1518	-66.8939	-67.234	-66.7298	-67.0135	-66.8322
47.45	-65.8791	-66.1931	-66.8373	-67.2546	-66.6346	-67.0047	-66.7622
47.5	-66.0079	-66.1572	-66.8646	-67.344	-66.5857	-66.9916	-66.7974
47.55	-66.0397	-66.085	-66.8774	-67.4716	-66.6179	-66.9214	-66.906
47.6	-65.9643	-66.0755	-66.8874	-67.5567	-66.6764	-66.8509	-67.0769
47.65	-65.8923	-66.1381	-66.97	-67.5442	-66.7005	-66.8454	-67.2749
47.7	-65.93	-66.2191	-67.0877	-67.4793	-66.7035	-66.8794	-67.3901
47.75	-66.0326	-66.2802	-67.1313	-67.4238	-66.7287	-66.9096	-67.3192
47.8	-66.0759	-66.3261	-67.0914	-67.3888	-66.7583	-66.9097	-67.1298
47.85	-66.0114	-66.3944	-67.0475	-67.3775	-66.7532	-66.8598	-67.0172
47.9	-65.8903	-66.4861	-67.0168	-67.4175	-66.7431	-66.7698	-67.0626
47.95	-65.8077	-66.5496	-66.9878	-67.4843	-66.7984	-66.7047	-67.1748
48	-65.8248	-66.5066	-66.9781	-67.4914	-66.8911	-66.7073	-67.2235
48.05	-65.9289	-66.3619	-66.9664	-67.3985	-66.8889	-66.7369	-67.1534
48.1	-66.0314	-66.2609	-66.9176	-67.2793	-66.7453	-66.715	-66.9688
48.15	-66.0772	-66.2699	-66.8497	-67.1954	-66.6022	-66.6339	-66.7268
48.2	-66.117	-66.2711	-66.8379	-67.1064	-66.6159	-66.587	-66.5624
48.25	-66.1821	-66.1678	-66.9352	-66.9795	-66.7849	-66.6621	-66.5832
48.3	-66.2298	-66.0362	-67.0355	-66.8823	-67.0242	-66.8315	-66.7549
48.35	-66.2174	-65.9927	-66.9849	-66.852	-67.2657	-66.9816	-66.9309
48.4	-66.169	-66.0035	-66.8132	-66.825	-67.447	-67.0521	-67.021
48.45	-66.1487	-66.0041	-66.6783	-66.787	-67.5139	-67.0472	-67.0465
48.5	-66.1386	-66.044	-66.6761	-66.8322	-67.4949	-66.9649	-67.0331
48.55	-66.0729	-66.1377	-66.7642	-67.0112	-67.4685	-66.7961	-66.9952
48.6	-65.9684	-66.1986	-66.8856	-67.2067	-67.4682	-66.5881	-66.9896
48.65	-65.9424	-66.1687	-67.0295	-67.2759	-67.457	-66.4609	-67.0474
48.7	-66.0594	-66.1113	-67.1603	-67.2455	-67.4232	-66.4893	-67.0677
48.75	-66.1918	-66.1315	-67.2178	-67.2356	-67.4109	-66.6246	-66.9593
48.8	-66.2219	-66.2082	-67.224	-67.2348	-67.441	-66.7504	-66.8193
48.85	-66.2087	-66.2463	-67.2371	-67.1552	-67.4619	-66.8117	-66.8056
48.9	-66.1869	-66.1917	-67.2381	-67.0021	-67.4375	-66.8289	-66.9244
48.95	-66.1089	-66.055	-67.1741	-66.8592	-67.422	-66.8473	-67.0216
49	-66.0026	-65.9056	-67.0796	-66.7586	-67.4652	-66.9257	-66.9973
49.05	-66.0067	-65.8406	-67.0382	-66.6863	-67.5253	-67.0614	-66.9166
49.1	-66.2042	-65.9039	-67.0399	-66.6686	-67.5487	-67.16	-66.8973
49.15	-66.4538	-66.0263	-66.9869	-66.7548	-67.5656	-67.1098	-66.9847
49.2	-66.5554	-66.079	-66.8469	-66.9172	-67.6001	-66.9231	-67.1039
49.25	-66.4751	-66.0251	-66.7362	-67.0401	-67.6194	-66.7531	-67.148
49.3	-66.3392	-65.9472	-66.765	-67.0666	-67.603	-66.6915	-67.0869
49.35	-66.2622	-65.9392	-66.8947	-67.0405	-67.5845	-66.6822	-66.9957
49.4	-66.2682	-66.006	-67.0235	-67.0055	-67.5727	-66.6462	-66.9931
49.45	-66.326	-66.1033	-67.1014	-66.9567	-67.5363	-66.6042	-67.0709
49.5	-66.3855	-66.1986	-67.1265	-66.9021	-67.4985	-66.6035	-67.1113
49.55	-66.3741	-66.2462	-67.105	-66.8662	-67.514	-66.6389	-67.0639
49.6	-66.2588	-66.1922	-67.0807	-66.8408	-67.5629	-66.7086	-66.962
49.65	-66.1123	-66.0494	-67.0828	-66.8231	-67.5603	-66.7919	-66.8593
49.7	-66.0506	-65.9323	-67.0498	-66.8395	-67.491	-66.8206	-66.7765
49.75	-66.1014	-65.9406	-66.9067	-66.8954	-67.4067	-66.7431	-66.7271
49.8	-66.1785	-66.0673	-66.6927	-66.9375	-67.3368	-66.6353	-66.7412
49.85	-66.1726	-66.2278	-66.5492	-66.905	-67.3195	-66.6536	-66.7816
49.9	-66.0382	-66.3187	-66.5482	-66.7918	-67.4212	-66.7909	-66.795
49.95	-65.8707	-66.2887	-66.6603	-66.6663	-67.63	-66.8782	-66.8144
50	-65.8206	-66.1831	-66.8192	-66.6105	-67.7835	-66.8492	-66.87
50.05	-65.895	-66.1135	-66.8985	-66.6533	-67.7442	-66.8301	-66.917
50.1	-65.9565	-66.1192	-66.7933	-66.768	-67.5433	-66.9163	-66.8888
50.15	-65.9037	-66.1271	-66.575	-66.8971	-67.3159	-67.0139	-66.8112
50.2	-65.8014	-66.0788	-66.4636	-66.9912	-67.1891	-67.0476	-66.805
50.25	-65.7818	-65.9855	-66.5587	-67.0004	-67.2212	-67.078	-66.9217
50.3	-65.8843	-65.9235	-66.729	-66.8978	-67.392	-67.1324	-67.0798
50.35	-66.0294	-65.9637	-66.8368	-66.7319	-67.5988	-67.1537	-67.1621
50.4	-66.1203	-66.0807	-66.8921	-66.6167	-67.7148	-67.1119	-67.1512
50.45	-66.1489	-66.1545	-66.9474	-66.6416	-67.6715	-67.0819	-67.094
50.5	-66.1484	-66.0707	-66.9712	-66.7748	-67.5144	-67.1427	-67.0012
50.55	-66.1394	-65.8933	-66.9057	-66.9061	-67.3736	-67.2362	-66.8741
50.6	-66.1427	-65.8121	-66.7608	-66.9259	-67.319	-67.2523	-66.7937
50.65	-66.1804	-65.8924	-66.6195	-66.7842	-67.32	-67.1484	-66.8595
50.7	-66.2575	-66.0205	-66.5406	-66.5715	-67.3211	-66.9799	-67.0477
50.75	-66.32	-66.1009	-66.5106	-66.4777	-67.2877	-66.8447	-67.2049
50.8	-66.3243	-66.1377	-66.4774	-66.5814	-67.2051	-66.7726	-67.2037
50.85	-66.2956	-66.1048	-66.4041	-66.728	-67.1068	-66.771	-67.0502
50.9	-66.2645	-65.9581	-66.3006	-66.7623	-67.0847	-66.8452	-66.826
50.95	-66.2204	-65.7692	-66.2526	-66.7369	-67.1526	-66.9198	-66.6157
51	-66.1407	-65.6924	-66.3352	-66.7921	-67.2123	-66.9419	-66.4847
51.05	-66.0444	-65.7385	-66.5043	-66.9483	-67.2139	-66.9572	-66.5002
51.1	-65.9593	-65.7592	-66.6303	-67.0868	-67.2163	-67.0074	-66.6671
51.15	-65.9014	-65.6983	-66.6478	-67.1261	-67.2654	-67.0594	-66.856
51.2	-65.8754	-65.6846	-66.5891	-67.094	-67.3023	-67.0586	-66.9146
51.25	-65.8715	-65.7901	-66.5337	-67.0576	-67.2991	-67.0486	-66.8308
51.3	-65.8704	-65.9344	-66.543	-67.0625	-67.3282	-67.0863	-66.7384
51.35	-65.8868	-66.0483	-66.5797	-67.0985	-67.4129	-67.0845	-66.725
51.4	-65.9491	-66.1473	-66.5429	-67.1478	-67.4798	-66.9957	-66.7492
51.45	-66.0455	-66.2407	-66.44	-67.1862	-67.4312	-66.914	-66.7522
51.5	-66.119	-66.3246	-66.385	-67.1662	-67.2731	-66.8881	-66.7111
51.55	-66.1118	-66.4253	-66.4284	-67.0998	-67.1143	-66.8986	-66.6326
51.6	-66.0284	-66.5772	-66.4959	-67.0437	-67.0134	-66.9155	-66.5562
51.65	-65.9678	-66.7242	-66.5179	-67.0178	-66.9164	-66.8964	-66.5521
51.7	-66.0269	-66.7494	-66.4948	-67.0095	-66.7841	-66.8118	-66.6636
51.75	-66.1639	-66.6348	-66.4234	-67.0457	-66.7047	-66.7081	-66.8191
51.8	-66.2513	-66.5014	-66.2738	-67.1769	-66.7832	-66.6814	-66.8868
51.85	-66.2452	-66.4543	-66.0964	-67.3272	-66.9532	-66.7498	-66.8356
51.9	-66.2001	-66.4967	-66.0214	-67.37	-67.0602	-66.8178	-66.8112
51.95	-66.1538	-66.5886	-66.0892	-67.3249	-67.0654	-66.8132	-66.9306
52	-66.0983	-66.7012	-66.1699	-67.2861	-67.0528	-66.7554	-67.1063
52.05	-66.04	-66.7727	-66.1409	-67.2452	-67.0842	-66.7083	-67.1937
52.1	-66.0078	-66.7382	-66.0575	-67.1145	-67.1593	-66.7033	-67.1411
52.15	-65.9921	-66.638	-66.0439	-66.9537	-67.2583	-66.7487	-66.9959
52.2	-65.9381	-66.6019	-66.0996	-66.9393	-67.3419	-66.8462	-66.8534
52.25	-65.8424	-66.6549	-66.1618	-67.0563	-67.3313	-66.9803	-66.814
52.3	-65.7918	-66.6874	-66.2469	-67.1359	-67.1716	-67.0979	-66.9211
52.35	-65.8402	-66.632	-66.3948	-67.1344	-66.9833	-67.1181	-67.1221
52.4	-65.9348	-66.5262	-66.5806	-67.142	-66.9626	-67.0059	-67.3074
52.45	-66.0109	-66.4077	-66.7584	-67.1861	-67.1075	-66.8002	-67.4285
52.5	-66.0546	-66.2964	-66.9213	-67.1821	-67.225	-66.6012	-67.5135
52.55	-66.0599	-66.2297	-67.0599	-67.1428	-67.1945	-66.5235	-67.5723
52.6	-66.0387	-66.2416	-67.1422	-67.2019	-67.1167	-66.6124	-67.5744
52.65	-66.0544	-66.2965	-67.1602	-67.3632	-67.1165	-66.7861	-67.5027
52.7	-66.139	-66.3309	-67.1706	-67.506	-67.1715	-66.8901	-67.3808
52.75	-66.2175	-66.3288	-67.2106	-67.557	-67.2019	-66.8578	-67.2543
52.8	-66.215	-66.3031	-67.2219	-67.4905	-67.1657	-66.7407	-67.1549
52.85	-66.1925	-66.2419	-67.1376	-67.3445	-67.089	-66.6438	-67.0834
52.9	-66.2648	-66.1321	-67.0028	-67.2157	-67.0246	-66.6252	-67.0138
52.95	-66.3993	-65.9929	-66.8968	-67.1623	-66.9872	-66.6303	-66.9068
53	-66.4575	-65.883	-66.8364	-67.177	-66.9825	-66.5826	-66.7718
53.05	-66.4266	-65.8287	-66.8054	-67.2042	-67.0041	-66.4996	-66.7077
53.1	-66.3925	-65.7744	-66.7857	-67.205	-67.0383	-66.5113	-66.8026
53.15	-66.373	-65.685	-66.7539	-67.2061	-67.0961	-66.6783	-66.9898
53.2	-66.343	-65.6428	-66.7109	-67.1982	-67.1769	-66.9012	-67.1114
53.25	-66.328	-65.7413	-66.7108	-67.1562	-67.2545	-67.0757	-67.098
53.3	-66.3472	-65.9391	-66.8199	-67.1368	-67.2856	-67.1889	-67.0024
53.35	-66.3668	-66.1145	-67.0473	-67.1665	-67.2513	-67.2377	-66.8923
53.4	-66.345	-66.186	-67.2949	-67.1923	-67.1755	-67.1879	-66.8055
53.45	-66.2987	-66.1617	-67.4326	-67.1698	-67.0725	-67.0611	-66.7675
53.5	-66.2697	-66.1268	-67.409	-67.0754	-66.9846	-66.943	-66.7827
53.55	-66.2347	-66.1653	-67.268	-66.9845	-66.9849	-66.8832	-66.812
53.6	-66.1108	-66.2535	-67.0811	-67.0451	-67.0987	-66.846	-66.8148
53.65	-65.9186	-66.2984	-66.9267	-67.2045	-67.2533	-66.7829	-66.8044
53.7	-65.8011	-66.2453	-66.8867	-67.2524	-67.3413	-66.698	-66.8151
53.75	-65.8332	-66.1285	-66.9749	-67.1227	-67.3393	-66.6149	-66.8132
53.8	-65.9179	-66.0186	-67.1109	-66.9389	-67.3054	-66.5322	-66.7477
53.85	-65.9421	-65.9366	-67.197	-66.7977	-67.2662	-66.4783	-66.6674
53.9	-65.9317	-65.8513	-67.2056	-66.6906	-67.1824	-66.5035	-66.6661
53.95	-65.9575	-65.7795	-67.1456	-66.6253	-67.0807	-66.5903	-66.7451
54	-66.0144	-65.8159	-67.0331	-66.64	-67.045	-66.6518	-66.8278
54.05	-66.076	-65.9874	-66.9342	-66.7022	-67.0747	-66.6527	-66.8643
54.1	-66.1879	-66.1748	-66.9458	-66.7546	-67.0895	-66.6528	-66.8523
54.15	-66.371	-66.2407	-67.0848	-66.7833	-67.0772	-66.7103	-66.8187
54.2	-66.5236	-66.198	-67.2397	-66.7838	-67.1001	-66.7849	-66.8143
54.25	-66.533	-66.1155	-67.3259	-66.7335	-67.1974	-66.8166	-66.8822
54.3	-66.4284	-65.9747	-67.3556	-66.6664	-67.3412	-66.805	-66.9894
54.35	-66.3009	-65.7558	-67.3161	-66.6743	-67.5013	-66.761	-67.0489
54.4	-66.1896	-65.5496	-67.1519	-66.7937	-67.673	-66.6813	-67.0239
54.45	-66.1148	-65.4852	-66.9253	-66.9212	-67.8189	-66.6193	-66.9657
54.5	-66.0959	-65.6085	-66.8063	-66.9497	-67.8693	-66.641	-66.9415
54.55	-66.1253	-65.8648	-66.8467	-66.9095	-67.8263	-66.7034	-66.9737
54.6	-66.1619	-66.1344	-66.9392	-66.8822	-67.742	-66.7047	-67.0264
54.65	-66.2044	-66.3148	-66.9705	-66.8982	-67.6236	-66.6497	-67.0511
54.7	-66.2894	-66.3365	-66.923	-66.9386	-67.4782	-66.6574	-67.0139
54.75	-66.3872	-66.1749	-66.8353	-66.978	-67.3922	-66.7921	-66.9273
54.8	-66.4049	-65.9283	-66.777	-67.0024	-67.4316	-66.9857	-66.8426
54.85	-66.3398	-65.7787	-66.8385	-67.0379	-67.5139	-67.1355	-66.7903
54.9	-66.2896	-65.8143	-67.0017	-67.0948	-67.5147	-67.2013	-66.737
54.95	-66.2974	-65.9395	-67.1082	-67.1086	-67.4431	-67.184	-66.6398
55	-66.3379	-66.0096	-67.0374	-67.0212	-67.4123	-67.1174	-66.5209
55.05	-66.3863	-65.9733	-66.8673	-66.8468	-67.4316	-67.0803	-66.4452
55.1	-66.4387	-65.894	-66.774	-66.6452	-67.3878	-67.155	-66.4631
55.15	-66.4587	-65.8522	-66.8204	-66.4824	-67.2401	-67.3145	-66.5662
55.2	-66.3936	-65.8608	-66.9412	-66.4347	-67.0746	-67.4169	-66.6746
55.25	-66.272	-65.8988	-67.0209	-66.5231	-66.9626	-67.3661	-66.7126
55.3	-66.201	-65.9192	-67.0093	-66.6874	-66.9305	-67.2258	-66.7256
55.35	-66.2447	-65.8862	-66.9651	-66.8735	-66.9816	-67.1088	-66.8082
55.4	-66.3392	-65.8171	-66.9275	-67.0772	-67.0687	-67.0266	-66.9356
55.45	-66.3688	-65.7566	-66.8733	-67.2663	-67.1145	-66.9325	-66.9598
55.5	-66.2585	-65.723	-66.7951	-67.3522	-67.1034	-66.8532	-66.8172
55.55	-66.0252	-65.6972	-66.7172	-67.2884	-67.0889	-66.8328	-66.6226
55.6	-65.7885	-65.6851	-66.6395	-67.1456	-67.1282	-66.825	-66.526
55.65	-65.6846	-65.7041	-66.555	-67.0531	-67.1906	-66.797	-66.5676
55.7	-65.7577	-65.7261	-66.5001	-67.0524	-67.1901	-66.8302	-66.6651
55.75	-65.8996	-65.7031	-66.4767	-67.0644	-67.1278	-66.9905	-66.7083
55.8	-65.9723	-65.6611	-66.4668	-67.0478	-67.115	-67.1934	-66.6431
55.85	-65.9481	-65.712	-66.5065	-67.0494	-67.1832	-67.329	-66.5156
55.9	-65.8916	-65.8785	-66.5968	-67.0725	-67.2232	-67.3759	-66.4253
55.95	-65.8675	-66.0536	-66.6857	-67.0715	-67.1471	-67.3605	-66.4426
56	-65.8786	-66.1394	-66.7424	-67.0853	-67.0022	-67.3096	-66.5346
56.05	-65.9243	-66.1149	-66.7741	-67.1883	-66.8787	-67.2525	-66.5942
56.1	-66.0212	-66.003	-66.79	-67.3441	-66.8241	-67.1899	-66.5983
56.15	-66.1506	-65.828	-66.7504	-67.4322	-66.8475	-67.1035	-66.6391
56.2	-66.2567	-65.6734	-66.6322	-67.4088	-66.9339	-67.0044	-66.7423
56.25	-66.2646	-65.6574	-66.4853	-67.3398	-67.0297	-66.9291	-66.7799
56.3	-66.1509	-65.7625	-66.3811	-67.2936	-67.0733	-66.898	-66.681
56.35	-65.9788	-65.8562	-66.3713	-67.2597	-67.0592	-66.8899	-66.5425
56.4	-65.8456	-65.8789	-66.4319	-67.2166	-67.0473	-66.8777	-66.4538
56.45	-65.7941	-65.9003	-66.5078	-67.1842	-67.0901	-66.8461	-66.4055
56.5	-65.7805	-65.9671	-66.5822	-67.1725	-67.1763	-66.8086	-66.3873
56.55	-65.7815	-66.0423	-66.624	-67.13	-67.2711	-66.7968	-66.4467
56.6	-65.816	-66.1113	-66.6164	-67.0348	-67.3562	-66.8263	-66.5802
56.65	-65.8751	-66.1633	-66.5938	-66.9493	-67.4205	-66.8651	-66.698
56.7	-65.9253	-66.1604	-66.594	-66.9238	-67.4245	-66.8515	-66.7244
56.75	-65.9218	-66.094	-66.6517	-66.9484	-67.3321	-66.7696	-66.6917
56.8	-65.8571	-65.9721	-66.7133	-67.0346	-67.1849	-66.6768	-66.6802
56.85	-65.7771	-65.8525	-66.6662	-67.1856	-67.1002	-66.6452	-66.7074
56.9	-65.7456	-65.8337	-66.5236	-67.2942	-67.1233	-66.6592	-66.7592
56.95	-65.8114	-65.9341	-66.4194	-67.2589	-67.181	-66.6339	-66.8064
57	-65.9296	-66.0859	-66.4063	-67.1512	-67.2034	-66.5372	-66.8084
57.05	-66.0182	-66.1996	-66.4198	-67.1326	-67.2094	-66.4583	-66.779
57.1	-66.0669	-66.2413	-66.425	-67.2208	-67.2059	-66.5189	-66.7836
57.15	-66.0805	-66.2564	-66.4482	-67.2843	-67.1402	-66.7208	-66.851
57.2	-66.0493	-66.2887	-66.4837	-67.2558	-67.0172	-66.928	-66.8856
57.25	-65.9848	-66.3472	-66.5004	-67.2193	-66.9406	-66.9595	-66.787
57.3	-65.9485	-66.3882	-66.503	-67.2383	-66.974	-66.7744	-66.6339
57.35	-66.0059	-66.3726	-66.5458	-67.2548	-67.0731	-66.5278	-66.6019
57.4	-66.0882	-66.3502	-66.6489	-67.2031	-67.1892	-66.4066	-66.7243
57.45	-66.0625	-66.4026	-66.7634	-67.1063	-67.3038	-66.4746	-66.8376
57.5	-65.9192	-66.4891	-66.8607	-67.0288	-67.3751	-66.6362	-66.8345
57.55	-65.7868	-66.485	-66.9677	-67.0056	-67.357	-66.7351	-66.8088
57.6	-65.754	-66.3792	-67.0576	-67.053	-67.2946	-66.6874	-66.8577
57.65	-65.7728	-66.292	-67.0282	-67.1281	-67.2594	-66.5527	-66.9327
57.7	-65.7644	-66.283	-66.8962	-67.1421	-67.2138	-66.4714	-66.9552
57.75	-65.7128	-66.2678	-66.8126	-67.0739	-67.1064	-66.5013	-66.9704
57.8	-65.6225	-66.1947	-66.8351	-67.0145	-67.0468	-66.5609	-67.0542
57.85	-65.5188	-66.1322	-66.8763	-67.0277	-67.191	-66.5383	-67.1569
57.9	-65.4665	-66.1493	-66.8806	-67.0734	-67.4722	-66.4563	-67.1882
57.95	-65.5229	-66.2316	-66.8789	-67.1173	-67.6687	-66.4481	-67.1256
58	-65.6389	-66.3475	-66.8724	-67.1966	-67.6738	-66.5641	-67.015
58.05	-65.7152	-66.4519	-66.8607	-67.3114	-67.5587	-66.6957	-66.919
58.1	-65.7403	-66.4407	-66.8899	-67.3578	-67.4017	-66.6825	-66.8599
58.15	-65.777	-66.2852	-66.957	-67.2757	-67.2354	-66.5241	-66.8434
58.2	-65.8421	-66.1243	-66.9964	-67.1441	-67.1553	-66.3857	-66.8618
58.25	-65.8794	-66.1066	-66.9732	-67.0619	-67.267	-66.3986	-66.893
58.3	-65.8789	-66.1701	-66.9442	-67.007	-67.5104	-66.5559	-66.9365
58.35	-65.8983	-66.1381	-66.965	-66.9391	-67.6694	-66.7078	-66.9708
58.4	-65.9611	-66.0121	-66.9981	-66.9289	-67.6233	-66.7113	-66.9761
58.45	-66.0061	-65.9355	-66.9647	-67.0404	-67.4491	-66.6059	-66.9941
58.5	-65.9902	-65.9796	-66.8358	-67.2015	-67.279	-66.5454	-67.0466
58.55	-65.9719	-66.0906	-66.6677	-67.271	-67.1955	-66.5964	-67.088
58.6	-65.9805	-66.172	-66.5292	-67.2064	-67.2254	-66.6584	-67.0345
58.65	-65.9861	-66.1736	-66.4751	-67.0715	-67.3589	-66.6656	-66.8775
58.7	-66.0116	-66.0947	-66.5481	-66.9247	-67.5339	-66.7126	-66.7045
58.75	-66.1149	-66.0227	-66.7299	-66.7944	-67.6753	-66.8404	-66.5698
58.8	-66.2578	-66.0641	-66.9091	-66.7321	-67.7713	-66.9276	-66.4474
58.85	-66.3065	-66.1733	-66.9836	-66.7897	-67.8602	-66.8519	-66.326
58.9	-66.2462	-66.1762	-66.9813	-66.8941	-67.9444	-66.6753	-66.2481
58.95	-66.2274	-65.9896	-66.9971	-66.9257	-67.9482	-66.5933	-66.2471
59	-66.3252	-65.7561	-67.0434	-66.8773	-67.8372	-66.6323	-66.2839
59.05	-66.4321	-65.6577	-67.049	-66.8212	-67.6795	-66.6682	-66.3106
59.1	-66.4362	-65.7073	-66.9724	-66.8074	-67.557	-66.6871	-66.3429
59.15	-66.3725	-65.8052	-66.855	-66.8265	-67.4934	-66.7496	-66.4353
59.2	-66.2915	-65.9024	-66.773	-66.8534	-67.4566	-66.8443	-66.5918
59.25	-66.1771	-66.0007	-66.7529	-66.8642	-67.4199	-66.8941	-66.7609
59.3	-66.0605	-66.0758	-66.7736	-66.8315	-67.3661	-66.8752	-66.8894
59.35	-66.0381	-66.116	-66.7975	-66.75	-67.3021	-66.8613	-66.9207
59.4	-66.1154	-66.1535	-66.7807	-66.6505	-67.2926	-66.8783	-66.8317
59.45	-66.1634	-66.1889	-66.6912	-66.5962	-67.3468	-66.9035	-66.6953
59.5	-66.1177	-66.1624	-66.5664	-66.5975	-67.3711	-66.9734	-66.6387
59.55	-66.0508	-66.0538	-66.4829	-66.5939	-67.3177	-67.0906	-66.7062
59.6	-66.0374	-65.9261	-66.4494	-66.5633	-67.3089	-67.1883	-66.8172
59.65	-66.054	-65.8337	-66.4071	-66.5799	-67.4709	-67.2192	-66.8632
59.7	-66.0422	-65.7442	-66.3509	-66.7043	-67.6935	-67.1824	-66.7869
59.75	-65.9837	-65.6248	-66.3081	-66.8356	-67.7784	-67.1319	-66.6368
59.8	-65.9132	-65.5176	-66.2487	-66.8543	-67.6681	-67.11	-66.5142
59.85	-65.8601	-65.4844	-66.1594	-66.807	-67.4568	-67.105	-66.4674
59.9	-65.8411	-65.5152	-66.118	-66.7902	-67.2904	-67.1376	-66.4638
59.95	-65.8778	-65.5399	-66.1863	-66.7954	-67.2534	-67.2292	-66.4438
60	-65.9715	-65.506	-66.3142	-66.7475	-67.3425	-67.3318	-66.4192
60.05	-66.0767	-65.4501	-66.3944	-66.6778	-67.4839	-67.3581	-66.4356
60.1	-66.1462	-65.4433	-66.3895	-66.6956	-67.5692	-67.2908	-66.4879
60.15	-66.1657	-65.4875	-66.3563	-66.7584	-67.5612	-67.199	-66.5134
60.2	-66.1644	-65.5225	-66.3573	-66.735	-67.5364	-67.1458	-66.4566
60.25	-66.1958	-65.5326	-66.3966	-66.6418	-67.5677	-67.1158	-66.3764
60.3	-66.2933	-65.5469	-66.4262	-66.6326	-67.6098	-67.0856	-66.3814
60.35	-66.416	-65.5657	-66.4119	-66.7535	-67.5925	-67.0787	-66.505
60.4	-66.4781	-65.5615	-66.3866	-66.8266	-67.5424	-67.1275	-66.6884
60.45	-66.4429	-65.5571	-66.3952	-66.734	-67.5676	-67.2227	-66.8136
60.5	-66.3771	-65.6203	-66.4343	-66.6177	-67.6948	-67.3374	-66.7898
60.55	-66.3709	-65.7327	-66.4967	-66.6458	-67.7954	-67.4506	-66.6426
60.6	-66.4278	-65.7652	-66.5662	-66.8018	-67.7399	-67.5021	-66.4821
60.65	-66.4756	-65.6952	-66.5965	-66.9506	-67.5276	-67.4205	-66.3608
60.7	-66.4801	-65.6366	-66.579	-67.0335	-67.2824	-67.2224	-66.2827
60.75	-66.4594	-65.6242	-66.5733	-67.0715	-67.1651	-67.0197	-66.2784
60.8	-66.4229	-65.6038	-66.6092	-67.031	-67.2284	-66.9071	-66.3658
60.85	-66.3675	-65.6128	-66.6399	-66.9203	-67.3254	-66.9277	-66.4609
60.9	-66.3345	-65.7322	-66.6204	-66.8514	-67.2672	-67.0664	-66.4779
60.95	-66.3778	-65.8981	-66.5981	-66.8423	-67.1008	-67.2092	-66.4716
61	-66.485	-65.9559	-66.6225	-66.8078	-67.0219	-67.2064	-66.5742
61.05	-66.5565	-65.9035	-66.64	-66.7555	-67.0898	-67.0307	-66.7852
61.1	-66.5129	-65.8815	-66.5713	-66.7928	-67.1983	-66.8639	-66.9658
61.15	-66.3687	-65.9268	-66.447	-66.9326	-67.2542	-66.8972	-67.0372
61.2	-66.1905	-65.9418	-66.3409	-67.0294	-67.3039	-67.1013	-67.0733
61.25	-66.0402	-65.8992	-66.2542	-67.0219	-67.4047	-67.2893	-67.1387
61.3	-65.9654	-65.8803	-66.1567	-67.0206	-67.4703	-67.3271	-67.1775
61.35	-65.9542	-65.931	-66.0889	-67.0579	-67.3871	-67.2537	-67.1395
61.4	-65.9326	-66.0204	-66.1176	-67.0722	-67.1919	-67.1863	-67.0848
61.45	-65.8364	-66.1058	-66.2152	-67.0711	-67.0518	-67.192	-67.0678
61.5	-65.6886	-66.1784	-66.3134	-67.0841	-67.0161	-67.2332	-67.0439
61.55	-65.578	-66.2354	-66.4205	-67.1205	-66.9502	-67.2315	-66.9628
61.6	-65.5498	-66.271	-66.5768	-67.1565	-66.8237	-67.1781	-66.8858
61.65	-65.548	-66.3098	-66.7209	-67.1366	-66.7792	-67.1334	-66.9038
61.7	-65.508	-66.3894	-66.7522	-67.0962	-66.9106	-67.145	-67.0122
61.75	-65.4552	-66.4575	-66.6798	-67.0972	-67.132	-67.1684	-67.1302
61.8	-65.4693	-66.43	-66.6158	-67.0723	-67.2567	-67.1152	-67.2149
61.85	-65.5807	-66.3334	-66.5996	-66.9956	-67.2037	-66.968	-67.2719
61.9	-65.7537	-66.2587	-66.5751	-66.9771	-67.0841	-66.8058	-67.2818
61.95	-65.9446	-66.1876	-66.5515	-67.0484	-67.0752	-66.7074	-67.2334
62	-66.0978	-66.0322	-66.6054	-67.1093	-67.216	-66.6859	-67.1931
62.05	-66.1571	-65.8113	-66.7009	-67.0743	-67.391	-66.7023	-67.2124
62.1	-66.1006	-65.6613	-66.7159	-66.9812	-67.4837	-66.7351	-67.25
62.15	-65.9926	-65.6909	-66.6693	-66.9001	-67.4672	-66.7878	-67.2633
62.2	-65.9478	-65.9003	-66.6852	-66.8296	-67.388	-66.8479	-67.2848
62.25	-65.9936	-66.2209	-66.7718	-66.7686	-67.2848	-66.8702	-67.3245
62.3	-66.0257	-66.5456	-66.7947	-66.7645	-67.1454	-66.8222	-67.3274
62.35	-65.9677	-66.7675	-66.7053	-66.8223	-66.9393	-66.7119	-67.279
62.4	-65.8618	-66.8186	-66.6282	-66.8636	-66.7112	-66.5935	-67.2429
62.45	-65.7772	-66.7117	-66.6492	-66.8218	-66.5815	-66.5322	-67.2319
62.5	-65.7445	-66.516	-66.7052	-66.7254	-66.641	-66.5568	-67.1791
62.55	-65.7982	-66.2989	-66.7502	-66.6292	-66.8393	-66.6268	-67.0829
62.6	-65.9645	-66.1023	-66.8356	-66.577	-67.0443	-66.6849	-67.0553
62.65	-66.1519	-65.9672	-66.9416	-66.6069	-67.1943	-66.7002	-67.1352
62.7	-66.218	-65.9388	-66.9669	-66.7094	-67.3138	-66.6788	-67.2234
62.75	-66.1482	-66.046	-66.895	-66.8168	-67.3969	-66.6315	-67.2268
62.8	-66.0635	-66.2771	-66.8144	-66.9066	-67.4302	-66.5676	-67.1523
62.85	-66.0184	-66.5397	-66.7961	-67.0431	-67.4872	-66.5119	-67.0315
62.9	-65.9433	-66.7019	-66.826	-67.2507	-67.6412	-66.5047	-66.8857
62.95	-65.8006	-66.6862	-66.8754	-67.4209	-67.7976	-66.5485	-66.7631
63	-65.6779	-66.5292	-66.9157	-67.425	-67.8136	-66.6034	-66.7164
63.05	-65.6866	-66.3124	-66.8933	-67.2978	-67.7219	-66.6495	-66.7244
63.1	-65.8223	-66.0745	-66.78	-67.1721	-67.6455	-66.7113	-66.7232
63.15	-66.0088	-65.866	-66.6552	-67.1041	-67.6087	-66.8038	-66.7093
63.2	-66.1849	-65.7824	-66.6414	-67.0629	-67.55	-66.8953	-66.7358
63.25	-66.2891	-65.8554	-66.7118	-67.0318	-67.4444	-66.9181	-66.819
63.3	-66.2294	-65.9531	-66.7216	-67.022	-67.3579	-66.8445	-66.9257
63.35	-66.0156	-65.9275	-66.6113	-67.0114	-67.384	-66.7437	-67.0362
63.4	-65.8287	-65.7909	-66.4716	-66.9663	-67.5003	-66.71	-67.1161
63.45	-65.8008	-65.6817	-66.4266	-66.8825	-67.5868	-66.7465	-67.117
63.5	-65.8974	-65.696	-66.5126	-66.8052	-67.5889	-66.7678	-67.0512
63.55	-66.0264	-65.7602	-66.672	-66.7818	-67.5502	-66.7428	-67.0006
63.6	-66.1062	-65.7799	-66.7778	-66.8276	-67.4894	-66.7422	-66.9952
63.65	-66.0693	-65.8077	-66.7502	-66.9302	-67.4121	-66.8159	-66.9741
63.7	-65.9528	-65.9195	-66.6491	-67.0628	-67.373	-66.9115	-66.8882
63.75	-65.9201	-66.0316	-66.5893	-67.1753	-67.4014	-66.9696	-66.7886
63.8	-66.0686	-66.0362	-66.6184	-67.2158	-67.4249	-66.9855	-66.7649
63.85	-66.3053	-65.9961	-66.6648	-67.1706	-67.3858	-66.9656	-66.8219
63.9	-66.4472	-66.0141	-66.6641	-67.0769	-67.3147	-66.8985	-66.9002
63.95	-66.4324	-66.0705	-66.6574	-66.9843	-67.2446	-66.7947	-66.9736
64	-66.3323	-66.0672	-66.6625	-66.9377	-67.1703	-66.6847	-67.0386
64.05	-66.2307	-65.989	-66.6105	-66.9658	-67.1332	-66.5778	-67.0341
64.1	-66.1899	-65.9514	-66.4705	-67.0363	-67.193	-66.4657	-66.9165
64.15	-66.2245	-66.0168	-66.3695	-67.0535	-67.3208	-66.3694	-66.7318
64.2	-66.2885	-66.1139	-66.442	-66.9671	-67.4168	-66.3627	-66.5613
64.25	-66.2878	-66.1497	-66.601	-66.845	-67.4368	-66.5064	-66.4401
64.3	-66.1799	-66.1398	-66.6765	-66.806	-67.4028	-66.7669	-66.3865
64.35	-66.0697	-66.1811	-66.6525	-66.8758	-67.3171	-67.0232	-66.4507
64.4	-66.0718	-66.2667	-66.6365	-66.9567	-67.1581	-67.1751	-66.6364
64.45	-66.1386	-66.2909	-66.6738	-66.9425	-66.9871	-67.1847	-66.8488
64.5	-66.1154	-66.2167	-66.6783	-66.8595	-66.9114	-67.0721	-66.979
64.55	-65.9689	-66.1232	-66.5985	-66.8104	-66.9364	-66.932	-67.0116
64.6	-65.8353	-66.0917	-66.5038	-66.8236	-66.9673	-66.898	-66.997
64.65	-65.8164	-66.0812	-66.4685	-66.8432	-66.9724	-66.9842	-66.9787
64.7	-65.9015	-66.0344	-66.5027	-66.8358	-66.9935	-67.0578	-66.9825
64.75	-66.0473	-65.9737	-66.5527	-66.7987	-67.017	-67.0604	-67.0032
64.8	-66.2326	-65.9384	-66.572	-66.7194	-66.9808	-67.0879	-67.0173
64.85	-66.4067	-65.9423	-66.5602	-66.5875	-66.9119	-67.2007	-67.0103
64.9	-66.462	-65.9686	-66.4946	-66.4491	-66.928	-67.3057	-66.9818
64.95	-66.3702	-66.0244	-66.3853	-66.3778	-67.0944	-67.3188	-66.8917
65	-66.2233	-66.1318	-66.3166	-66.3768	-67.3627	-67.2501	-66.7167
65.05	-66.1525	-66.2455	-66.3371	-66.3918	-67.6377	-67.1152	-66.5612
65.1	-66.2129	-66.2868	-66.4402	-66.4337	-67.8457	-66.9406	-66.5275
65.15	-66.2892	-66.2184	-66.5721	-66.5852	-67.9305	-66.8404	-66.5763
65.2	-66.2464	-66.0878	-66.6494	-66.8305	-67.8978	-66.9208	-66.6315
65.25	-66.1166	-65.9922	-66.6082	-67.0237	-67.8295	-67.1005	-66.6936
65.3	-66.0296	-65.9617	-66.4817	-67.0587	-67.785	-67.2102	-66.7627
65.35	-66.0431	-65.9538	-66.4004	-66.9636	-67.7206	-67.2135	-66.7911
65.4	-66.0547	-65.8944	-66.4292	-66.7926	-67.5804	-67.2211	-66.77
65.45	-65.9612	-65.7695	-66.4685	-66.5886	-67.3823	-67.3064	-66.7145
65.5	-65.8468	-65.7045	-66.4131	-66.4254	-67.2017	-67.3995	-66.6033
65.55	-65.8689	-65.8	-66.2922	-66.383	-67.0969	-67.42	-66.4398
65.6	-66.0571	-65.9981	-66.1998	-66.4408	-67.0855	-67.3787	-66.3434
65.65	-66.2534	-66.1567	-66.1608	-66.5069	-67.1733	-67.3232	-66.4454
65.7	-66.2927	-66.2026	-66.1389	-66.5601	-67.3425	-67.2692	-66.653
65.75	-66.2106	-66.1627	-66.1098	-66.6432	-67.5291	-67.2364	-66.7551
65.8	-66.1144	-66.0687	-66.1074	-66.7421	-67.6524	-67.2367	-66.7005
65.85	-66.0256	-65.9243	-66.1785	-66.7797	-67.6996	-67.2158	-66.5969
65.9	-65.9118	-65.7865	-66.2977	-66.7566	-67.7113	-67.1414	-66.5368
65.95	-65.7682	-65.7441	-66.3821	-66.7718	-67.6913	-67.0587	-66.5279
66	-65.626	-65.8078	-66.3669	-66.8833	-67.5987	-67.0271	-66.5738
66.05	-65.5383	-65.9072	-66.2922	-67.0138	-67.4516	-67.0646	-66.6889
66.1	-65.5308	-66.0082	-66.2618	-67.0559	-67.3453	-67.1711	-66.8348
66.15	-65.5766	-66.1291	-66.3287	-66.9911	-67.3333	-67.3552	-66.9315
66.2	-65.6464	-66.2087	-66.4534	-66.8585	-67.3967	-67.5643	-66.9138
66.25	-65.7745	-66.1513	-66.5318	-66.7162	-67.4825	-67.6786	-66.8249
66.3	-65.974	-66.0104	-66.4732	-66.6382	-67.538	-67.631	-66.7615
66.35	-66.1508	-65.9699	-66.3106	-66.6896	-67.5297	-67.507	-66.7376
66.4	-66.213	-66.0858	-66.2245	-66.8643	-67.4643	-67.4519	-66.7373
66.45	-66.1924	-66.2044	-66.3319	-67.0907	-67.3591	-67.4648	-66.7825
66.5	-66.1665	-66.184	-66.5049	-67.2695	-67.2501	-67.444	-66.8936
66.55	-66.1261	-66.0446	-66.5482	-67.3153	-67.2215	-67.3582	-67.038
66.6	-66.0514	-65.9073	-66.4549	-67.203	-67.3184	-67.2798	-67.1473
66.65	-65.9787	-65.8424	-66.4095	-67.0178	-67.4758	-67.252	-67.2112
66.7	-65.9419	-65.8462	-66.4975	-66.9332	-67.5827	-67.207	-67.2489
66.75	-65.9321	-65.8751	-66.5786	-67.0349	-67.5812	-67.1282	-67.2593
66.8	-65.9138	-65.843	-66.5177	-67.2141	-67.4527	-67.1108	-67.2686
66.85	-65.8371	-65.7449	-66.3486	-67.2865	-67.2374	-67.196	-67.2641
66.9	-65.6754	-65.7116	-66.2063	-67.224	-67.0733	-67.2956	-67.1792
66.95	-65.5332	-65.8464	-66.163	-67.1366	-67.0812	-67.284	-66.9815
67	-65.5661	-66.046	-66.218	-67.0748	-67.2306	-67.1424	-66.743
67.05	-65.7647	-66.0922	-66.3656	-67.0256	-67.363	-66.9572	-66.6073
67.1	-65.9255	-65.9591	-66.5585	-66.9845	-67.3838	-66.8291	-66.6379
67.15	-65.8744	-65.8442	-66.694	-66.9536	-67.341	-66.82	-66.7677
67.2	-65.7059	-65.9144	-66.7383	-66.9423	-67.3114	-66.8911	-66.9127
67.25	-65.6444	-66.1127	-66.7686	-66.9755	-67.3145	-66.9702	-67.0182
67.3	-65.7244	-66.2625	-66.8424	-67.0584	-67.3096	-67.0524	-67.0195
67.35	-65.7948	-66.2786	-66.9373	-67.1452	-67.27	-67.1333	-66.8822
67.4	-65.7645	-66.157	-67.0272	-67.1721	-67.193	-67.1736	-66.6989
67.45	-65.7232	-65.9384	-67.1042	-67.089	-67.1203	-67.1454	-66.5948
67.5	-65.7544	-65.7394	-67.121	-66.9257	-67.1688	-67.069	-66.5887
67.55	-65.8328	-65.6951	-67.0145	-66.8031	-67.3849	-67.0034	-66.6387
67.6	-65.9277	-65.8069	-66.8037	-66.8374	-67.6411	-66.984	-66.7528
67.65	-66.0394	-65.9637	-66.6049	-67.0361	-67.7763	-67.0262	-66.9344
67.7	-66.125	-66.1002	-66.4788	-67.252	-67.7827	-67.0998	-67.0894
67.75	-66.099	-66.2283	-66.374	-67.31	-67.7548	-67.1084	-67.109
67.8	-65.9704	-66.3208	-66.283	-67.1718	-67.7218	-67.0452	-67.01
67.85	-65.8462	-66.3009	-66.2825	-66.9833	-67.6653	-66.9969	-66.9347
67.9	-65.7806	-66.1739	-66.378	-66.9474	-67.5986	-66.9581	-66.9652
67.95	-65.7429	-66.0566	-66.4699	-67.0836	-67.5727	-66.8869	-67.0289
68	-65.751	-66.0341	-66.4911	-67.2331	-67.5981	-66.83	-67.0165
68.05	-65.8776	-66.1175	-66.4827	-67.2627	-67.6228	-66.8772	-66.8867
68.1	-66.1113	-66.3068	-66.5126	-67.204	-67.6548	-67.0279	-66.7116
68.15	-66.3215	-66.5384	-66.5869	-67.1858	-67.7258	-67.1252	-66.6115
68.2	-66.4191	-66.6592	-66.6563	-67.2281	-67.7791	-67.0715	-66.6471
68.25	-66.423	-66.5892	-66.6731	-67.2444	-67.729	-66.9871	-66.7769
68.3	-66.3802	-66.4192	-66.6206	-67.2039	-67.6036	-67.0077	-66.8751
68.35	-66.3171	-66.2835	-66.5125	-67.1646	-67.5207	-67.1072	-66.8792
68.4	-66.2634	-66.222	-66.3992	-67.1446	-67.516	-67.1826	-66.86
68.45	-66.2416	-66.1822	-66.3553	-67.0636	-67.4933	-67.2289	-66.8855
68.5	-66.2603	-66.1148	-66.4082	-66.9228	-67.3968	-67.3054	-66.8909
68.55	-66.3207	-66.029	-66.5263	-66.837	-67.3019	-67.3938	-66.794
68.6	-66.4268	-65.9618	-66.69	-66.813	-67.2935	-67.4443	-66.6894
68.65	-66.5699	-65.9297	-66.8661	-66.7728	-67.343	-67.4614	-66.7096
68.7	-66.7027	-65.9181	-66.9605	-66.7253	-67.4223	-67.434	-66.8229
68.75	-66.7435	-65.8927	-66.9156	-66.7578	-67.5644	-67.3076	-66.9274
68.8	-66.6628	-65.8365	-66.807	-66.882	-67.7372	-67.1178	-67.0139
68.85	-66.527	-65.8034	-66.7489	-66.9855	-67.8374	-66.9999	-67.0963
68.9	-66.4213	-65.8858	-66.7708	-67.006	-67.8291	-67.0321	-67.0669
68.95	-66.3581	-66.0762	-66.8059	-66.994	-67.7772	-67.1669	-66.8335
69	-66.3319	-66.2325	-66.7956	-66.9664	-67.7363	-67.3523	-66.5006
69.05	-66.3686	-66.2598	-66.7512	-66.8796	-67.723	-67.5669	-66.2912
69.1	-66.4654	-66.24	-66.7089	-66.7309	-67.7373	-67.7055	-66.3025
69.15	-66.5509	-66.2834	-66.6737	-66.642	-67.7549	-67.6374	-66.4652
69.2	-66.5625	-66.3434	-66.6464	-66.7225	-67.7831	-67.3908	-66.6591
69.25	-66.4973	-66.335	-66.624	-66.8792	-67.8479	-67.1691	-66.8023
69.3	-66.4012	-66.3038	-66.5907	-66.9923	-67.9342	-67.1176	-66.863
69.35	-66.329	-66.3354	-66.5201	-67.0609	-67.9855	-67.2024	-66.8653
69.4	-66.3293	-66.4103	-66.3963	-67.0429	-67.9473	-67.3415	-66.865
69.45	-66.4	-66.4657	-66.2471	-66.8932	-67.8583	-67.4904	-66.9129
69.5	-66.4546	-66.4855	-66.1422	-66.6955	-67.8067	-67.5957	-67.017
69.55	-66.4039	-66.4771	-66.1202	-66.5668	-67.8148	-67.5891	-67.1097
69.6	-66.276	-66.4161	-66.1739	-66.5768	-67.837	-67.5143	-67.0921
69.65	-66.1423	-66.3016	-66.2922	-66.7086	-67.8257	-67.4785	-66.9779
69.7	-66.0234	-66.1984	-66.4364	-66.8708	-67.801	-67.4685	-66.8925
69.75	-65.9395	-66.1618	-66.5344	-67.0119	-67.7809	-67.3896	-66.9017
69.8	-65.9523	-66.1508	-66.5361	-67.117	-67.7081	-67.2315	-66.9586
69.85	-66.0368	-66.107	-66.472	-67.1576	-67.58	-67.1124	-67.0169
69.9	-66.0604	-66.026	-66.4266	-67.1265	-67.4865	-67.1145	-67.0843
69.95	-65.9578	-65.9324	-66.4431	-67.0418	-67.4954	-67.1916	-67.1449
70	-65.8297	-65.8456	-66.4572	-66.9556	-67.5505	-67.2653	-67.1376
70.05	-65.807	-65.8062	-66.3937	-66.9013	-67.5238	-67.3318	-67.0667
70.1	-65.9091	-65.8366	-66.2539	-66.843	-67.42	-67.4118	-67.0326
70.15	-66.0538	-65.8927	-66.0963	-66.8105	-67.3606	-67.4736	-67.0845
70.2	-66.1505	-65.9121	-66.0062	-66.8662	-67.4009	-67.4838	-67.1474
70.25	-66.1376	-65.8882	-66.0604	-66.8905	-67.4988	-67.4282	-67.1534
70.3	-66.0032	-65.8766	-66.248	-66.7697	-67.6137	-67.2945	-67.1202
70.35	-65.8469	-65.9406	-66.4397	-66.6324	-67.738	-67.1218	-67.0628
70.4	-65.8225	-66.0759	-66.5172	-66.6402	-67.827	-67.0013	-66.9792
70.45	-65.9719	-66.1992	-66.4693	-66.7683	-67.8052	-66.9611	-66.9377
70.5	-66.1764	-66.2547	-66.3618	-66.8867	-67.6486	-66.9491	-67.0153
70.55	-66.3205	-66.2559	-66.2461	-66.9465	-67.443	-66.9316	-67.1377
70.6	-66.375	-66.2245	-66.1373	-66.9967	-67.3064	-66.9439	-67.1606
70.65	-66.3448	-66.1396	-66.0762	-67.0659	-67.2827	-66.991	-67.094
70.7	-66.2296	-65.9987	-66.138	-67.0978	-67.3298	-66.9851	-67.0631
70.75	-66.0731	-65.8635	-66.3263	-67.0493	-67.415	-66.8569	-67.1173
70.8	-65.962	-65.8071	-66.496	-66.9972	-67.5537	-66.6846	-67.2015
70.85	-65.9424	-65.8401	-66.5214	-67.0236	-67.725	-66.5969	-67.2659
70.9	-65.9722	-65.9181	-66.438	-67.0501	-67.8413	-66.6036	-67.3112
70.95	-65.9914	-66.0215	-66.3372	-66.954	-67.8336	-66.6279	-67.3542
71	-65.9946	-66.1323	-66.2583	-66.779	-67.7188	-66.6821	-67.3881
71.05	-66.0274	-66.2003	-66.2291	-66.6247	-67.5682	-66.8396	-67.4018
71.1	-66.1361	-66.1967	-66.295	-66.5075	-67.4484	-67.0559	-67.3952
71.15	-66.264	-66.1556	-66.4113	-66.4482	-67.377	-67.197	-67.364
71.2	-66.2903	-66.1035	-66.4638	-66.5255	-67.3241	-67.2271	-67.2868
71.25	-66.1762	-66.0301	-66.4118	-66.7384	-67.2436	-67.2369	-67.1825
71.3	-65.9933	-65.9636	-66.3225	-66.9679	-67.1368	-67.2952	-67.1064
71.35	-65.8166	-65.9828	-66.2623	-67.1119	-67.0738	-67.3699	-67.0617
71.4	-65.6772	-66.129	-66.2456	-67.1418	-67.1141	-67.4074	-66.9984
71.45	-65.6	-66.3148	-66.291	-67.0549	-67.1885	-67.4133	-66.9136
71.5	-65.6094	-66.4054	-66.377	-66.8735	-67.1788	-67.402	-66.8373
71.55	-65.7011	-66.3476	-66.4043	-66.7064	-67.0991	-67.3484	-66.7663
71.6	-65.8121	-66.1966	-66.3115	-66.6786	-67.0945	-67.2408	-66.6823
71.65	-65.8593	-66.0477	-66.2001	-66.8133	-67.2161	-67.1578	-66.6213
71.7	-65.792	-65.9697	-66.2371	-67.0287	-67.3607	-67.1972	-66.6434
71.75	-65.6304	-66.0198	-66.4053	-67.2307	-67.4445	-67.3501	-66.7215
71.8	-65.478	-66.1908	-66.5178	-67.3517	-67.5001	-67.5133	-66.7663
71.85	-65.4588	-66.3496	-66.462	-67.342	-67.556	-67.6383	-66.7878
71.9	-65.6057	-66.348	-66.3433	-67.2137	-67.5816	-67.7518	-66.8926
71.95	-65.7788	-66.2278	-66.3421	-67.0362	-67.5861	-67.8521	-67.0892
72	-65.8046	-66.1839	-66.4839	-66.8896	-67.6423	-67.864	-67.2714
72.05	-65.6764	-66.2747	-66.6612	-66.8272	-67.7494	-67.7389	-67.3514
72.1	-65.544	-66.3682	-66.7467	-66.8464	-67.8143	-67.5081	-67.3171
72.15	-65.5388	-66.3682	-66.6758	-66.8972	-67.7939	-67.2325	-67.1917
72.2	-65.6647	-66.3234	-66.5026	-66.9463	-67.7477	-66.9725	-67.0262
72.25	-65.8625	-66.2951	-66.3678	-66.9657	-67.7254	-66.8114	-66.8667
72.3	-66.0615	-66.2801	-66.3857	-66.9408	-67.7301	-66.805	-66.7196
72.35	-66.1786	-66.2912	-66.5102	-66.9169	-67.7695	-66.9162	-66.5999
72.4	-66.1702	-66.3377	-66.6122	-66.9567	-67.853	-67.0813	-66.5599
72.45	-66.1142	-66.3685	-66.6627	-67.0332	-67.9177	-67.2856	-66.6401
72.5	-66.1501	-66.3144	-66.6929	-67.0734	-67.874	-67.5084	-66.7993
72.55	-66.2556	-66.2012	-66.6993	-67.0793	-67.7629	-67.6491	-66.9371
72.6	-66.2736	-66.1393	-66.6537	-67.0997	-67.7338	-67.6295	-66.9762
72.65	-66.171	-66.1675	-66.5758	-67.0998	-67.8218	-67.5063	-66.9316
72.7	-66.0902	-66.2359	-66.5155	-67.02	-67.9108	-67.4069	-66.8493
72.75	-66.1192	-66.2777	-66.4348	-66.9033	-67.9305	-67.3533	-66.7286
72.8	-66.1762	-66.2635	-66.277	-66.8368	-67.9522	-67.2691	-66.6008
72.85	-66.1954	-66.219	-66.1043	-66.8015	-68.0096	-67.1374	-66.5886
72.9	-66.1845	-66.1727	-66.0278	-66.7237	-67.9997	-67.0361	-66.751
72.95	-66.1269	-66.1737	-66.0742	-66.6066	-67.867	-67.0138	-66.9316
73	-66.0432	-66.2752	-66.1578	-66.5235	-67.7435	-67.0469	-66.948
73.05	-66.0256	-66.4451	-66.2306	-66.5038	-67.7496	-67.1267	-66.7993
73.1	-66.1293	-66.5789	-66.3188	-66.512	-67.8261	-67.2536	-66.6108
73.15	-66.2822	-66.5942	-66.3588	-66.5317	-67.8584	-67.3629	-66.4936
73.2	-66.3712	-66.5012	-66.2932	-66.5897	-67.8426	-67.3535	-66.494
73.25	-66.3782	-66.3739	-66.2238	-66.6781	-67.8159	-67.2072	-66.6102
73.3	-66.335	-66.2813	-66.2513	-66.744	-67.7582	-66.9925	-66.7685
73.35	-66.2634	-66.2545	-66.3313	-66.7863	-67.6702	-66.7744	-66.857
73.4	-66.1823	-66.2526	-66.3465	-66.8386	-67.6256	-66.5961	-66.8273
73.45	-66.1402	-66.2155	-66.3015	-66.8957	-67.6376	-66.5254	-66.7404
73.5	-66.1759	-66.1431	-66.3207	-66.9208	-67.6301	-66.6358	-66.6941
73.55	-66.2114	-66.0861	-66.4358	-66.9068	-67.5689	-66.8858	-66.7116
73.6	-66.185	-66.1105	-66.575	-66.8634	-67.5044	-67.1307	-66.7671
73.65	-66.1958	-66.2012	-66.7109	-66.7931	-67.4671	-67.2672	-66.8285
73.7	-66.3076	-66.2829	-66.8722	-66.6951	-67.4406	-67.2982	-66.8712
73.75	-66.4035	-66.3538	-67.0202	-66.5909	-67.4478	-67.2534	-66.8848
73.8	-66.3594	-66.4084	-67.0634	-66.5096	-67.5274	-67.1622	-66.8805
73.85	-66.2519	-66.3744	-66.9963	-66.446	-67.6533	-67.1025	-66.8951
73.9	-66.2468	-66.237	-66.8789	-66.3801	-67.755	-67.1364	-66.9161
73.95	-66.3244	-66.1104	-66.7053	-66.349	-67.8149	-67.2154	-66.8815
74	-66.3566	-66.1148	-66.4592	-66.4388	-67.862	-67.2379	-66.7774
74.05	-66.3342	-66.2318	-66.2568	-66.6582	-67.8896	-67.2124	-66.6755
74.1	-66.3138	-66.3591	-66.2241	-66.8969	-67.8587	-67.2312	-66.6596
74.15	-66.2971	-66.4265	-66.3253	-67.0147	-67.7915	-67.2971	-66.7077
74.2	-66.251	-66.4113	-66.4431	-66.9746	-67.7487	-67.325	-66.7496
74.25	-66.2257	-66.3129	-66.5204	-66.8279	-67.7341	-67.2792	-66.7742
74.3	-66.3022	-66.1662	-66.5357	-66.6288	-67.7062	-67.2204	-66.8123
74.35	-66.4339	-66.0626	-66.4457	-66.4314	-67.6725	-67.1791	-66.8684
74.4	-66.491	-66.0489	-66.2621	-66.3158	-67.6874	-67.1271	-66.8977
74.45	-66.4621	-66.0776	-66.0915	-66.3322	-67.7485	-67.0888	-66.8916
74.5	-66.4467	-66.0867	-66.0702	-66.4272	-67.7987	-67.1266	-66.8797
74.55	-66.4777	-66.0571	-66.2319	-66.507	-67.8044	-67.232	-66.8744
74.6	-66.5059	-66.0028	-66.4489	-66.5537	-67.7704	-67.3212	-66.8695
74.65	-66.5136	-65.942	-66.5495	-66.6284	-67.6828	-67.3618	-66.8228
74.7	-66.5097	-65.8884	-66.465	-66.727	-67.5319	-67.394	-66.7307
74.75	-66.4551	-65.8585	-66.2857	-66.7529	-67.3982	-67.4155	-66.6634
74.8	-66.3496	-65.9144	-66.173	-66.6504	-67.389	-67.3843	-66.6612
74.85	-66.2962	-66.0769	-66.2142	-66.4732	-67.4952	-67.3051	-66.7064
74.9	-66.3732	-66.2148	-66.349	-66.318	-67.611	-67.2667	-66.7599
74.95	-66.5003	-66.1861	-66.4218	-66.2556	-67.6712	-67.3325	-66.8123
75	-66.5255	-66.0217	-66.3729	-66.3273	-67.6543	-67.4425	-66.8493
75.05	-66.4107	-65.8793	-66.2885	-66.4915	-67.5598	-67.505	-66.796
75.1	-66.2359	-65.8261	-66.2815	-66.6105	-67.4449	-67.4662	-66.6494
75.15	-66.1152	-65.8045	-66.3634	-66.5548	-67.3988	-67.347	-66.5045
75.2	-66.1096	-65.7767	-66.4032	-66.3541	-67.4916	-67.2301	-66.4246
75.25	-66.185	-65.7566	-66.2598	-66.1913	-67.6739	-67.1898	-66.4289
75.3	-66.2392	-65.7743	-65.9342	-66.2032	-67.779	-67.2487	-66.5092
75.35	-66.1781	-65.8422	-65.5913	-66.3518	-67.7089	-67.3429	-66.6293
75.4	-66.0391	-65.9536	-65.3897	-66.4863	-67.5563	-67.4036	-66.7067
75.45	-65.9456	-66.0826	-65.3572	-66.5148	-67.4642	-67.4379	-66.6827
75.5	-65.9764	-66.1569	-65.4733	-66.4289	-67.4633	-67.4601	-66.6115
75.55	-66.09	-66.1513	-65.7494	-66.2726	-67.5105	-67.4588	-66.5907
75.6	-66.1471	-66.1356	-66.105	-66.166	-67.5569	-67.4287	-66.5846
75.65	-66.0656	-66.1803	-66.3616	-66.2232	-67.5818	-67.4118	-66.5037
75.7	-65.9087	-66.2571	-66.4411	-66.4161	-67.5751	-67.4433	-66.413
75.75	-65.8255	-66.2979	-66.4318	-66.5748	-67.538	-67.4532	-66.4791
75.8	-65.9028	-66.3102	-66.401	-66.5671	-67.504	-67.3985	-66.7054
75.85	-66.0681	-66.3421	-66.3273	-66.4364	-67.469	-67.3672	-66.9083
75.9	-66.1761	-66.3689	-66.2271	-66.3459	-67.4053	-67.4181	-66.9606
75.95	-66.1322	-66.3032	-66.2004	-66.408	-67.3185	-67.4764	-66.8794
76	-65.9583	-66.146	-66.2788	-66.5793	-67.2544	-67.436	-66.7376
76.05	-65.7527	-65.9996	-66.3867	-66.7692	-67.283	-67.2933	-66.6168
76.1	-65.6303	-65.941	-66.4771	-66.9252	-67.4097	-67.1153	-66.5965
76.15	-65.6535	-65.9517	-66.5679	-67.0099	-67.5451	-66.9288	-66.6564
76.2	-65.7869	-66.0032	-66.6261	-67.0327	-67.5945	-66.7868	-66.6715
76.25	-65.9284	-66.1171	-66.575	-67.0192	-67.5653	-66.7609	-66.59
76.3	-66.0074	-66.2878	-66.4271	-66.9536	-67.535	-66.7988	-66.4959
76.35	-66.045	-66.4204	-66.3202	-66.8185	-67.5387	-66.825	-66.5007
76.4	-66.0679	-66.4501	-66.3552	-66.7117	-67.5877	-66.8761	-66.597
76.45	-66.0307	-66.4233	-66.4755	-66.7729	-67.6643	-66.9975	-66.6747
76.5	-65.9052	-66.4199	-66.5608	-66.939	-67.6891	-67.1435	-66.6956
76.55	-65.7561	-66.4529	-66.5816	-67.01	-67.6105	-67.1891	-66.7277
76.6	-65.6208	-66.5065	-66.5628	-66.912	-67.5133	-67.0792	-66.8397
76.65	-65.445	-66.5816	-66.5015	-66.7675	-67.528	-66.9112	-66.9962
76.7	-65.2139	-66.6613	-66.4062	-66.7238	-67.6134	-66.8297	-67.1026
76.75	-65.0116	-66.6976	-66.3619	-66.7574	-67.6267	-66.9115	-67.116
76.8	-64.8909	-66.6721	-66.425	-66.7879	-67.5686	-67.11	-67.0229
76.85	-64.8389	-66.6076	-66.5255	-66.823	-67.5557	-67.2938	-66.8668
76.9	-64.8363	-66.5306	-66.5582	-66.8798	-67.6071	-67.3819	-66.7597
76.95	-64.8645	-66.4594	-66.5201	-66.9003	-67.6277	-67.3942	-66.7862
77	-64.8882	-66.42	-66.4598	-66.8076	-67.5773	-67.372	-66.9123
77.05	-64.8976	-66.4053	-66.3833	-66.6517	-67.5195	-67.316	-67.0013
77.1	-64.9213	-66.3816	-66.2796	-66.5681	-67.5007	-67.2211	-66.954
77.15	-65.0031	-66.3358	-66.1955	-66.6068	-67.4844	-67.1019	-66.7812
77.2	-65.1317	-66.306	-66.1688	-66.7312	-67.4695	-66.9871	-66.5869
77.25	-65.2384	-66.3216	-66.1466	-66.8631	-67.51	-66.8986	-66.4955
77.3	-65.2729	-66.3451	-66.063	-66.9091	-67.572	-66.863	-66.5781
77.35	-65.2399	-66.3303	-65.9562	-66.8393	-67.5691	-66.8872	-66.7866
77.4	-65.1597	-66.3235	-65.9024	-66.7127	-67.5267	-66.916	-66.9845
77.45	-65.0795	-66.399	-65.9114	-66.6528	-67.5608	-66.9045	-67.0923
77.5	-65.0665	-66.5305	-65.9636	-66.7194	-67.6561	-66.886	-67.1458
77.55	-65.1333	-66.5979	-66.0532	-66.8178	-67.6556	-66.9124	-67.1934
77.6	-65.1901	-66.5585	-66.1366	-66.8808	-67.5195	-66.9679	-67.2088
77.65	-65.1679	-66.4982	-66.1637	-66.9426	-67.3759	-67.0354	-67.1428
77.7	-65.1256	-66.4916	-66.1794	-66.9818	-67.3252	-67.1329	-67.0167
77.75	-65.1645	-66.5167	-66.2599	-66.9469	-67.3191	-67.2086	-66.9241
77.8	-65.2794	-66.5434	-66.3964	-66.8763	-67.2858	-67.161	-66.9119
77.85	-65.3755	-66.5483	-66.5219	-66.8505	-67.2785	-66.9876	-66.9134
77.9	-65.3849	-66.4681	-66.6225	-66.8653	-67.3312	-66.8549	-66.8474
77.95	-65.3205	-66.2825	-66.7011	-66.8531	-67.3742	-66.9142	-66.7251
78	-65.2441	-66.1235	-66.7022	-66.8525	-67.3796	-67.0967	-66.602
78.05	-65.2229	-66.1161	-66.5705	-66.9446	-67.3918	-67.2092	-66.522
78.1	-65.2696	-66.1982	-66.3743	-67.025	-67.4561	-67.1669	-66.5093
78.15	-65.3333	-66.2368	-66.2372	-66.9684	-67.5553	-67.0737	-66.5451
78.2	-65.35	-66.2274	-66.1805	-66.8461	-67.6345	-67.029	-66.5542
78.25	-65.287	-66.2439	-66.1458	-66.7554	-67.679	-67.0359	-66.4928
78.3	-65.1896	-66.2769	-66.1328	-66.7026	-67.6764	-67.0921	-66.4013
78.35	-65.1664	-66.2599	-66.1866	-66.6713	-67.6461	-67.189	-66.3383
78.4	-65.2549	-66.2084	-66.2819	-66.6409	-67.6648	-67.241	-66.3013
78.45	-65.3594	-66.2069	-66.3581	-66.6194	-67.758	-67.1597	-66.2656
78.5	-65.4063	-66.2576	-66.3971	-66.6338	-67.855	-67.0105	-66.2511
78.55	-65.4316	-66.3108	-66.421	-66.6648	-67.8534	-66.9507	-66.3137
78.6	-65.4819	-66.3732	-66.4109	-66.6809	-67.7556	-67.0159	-66.4513
78.65	-65.5384	-66.4671	-66.3209	-66.6507	-67.687	-67.0823	-66.571
78.7	-65.5876	-66.5519	-66.1663	-66.5678	-67.7464	-67.0499	-66.5812
78.75	-65.6299	-66.5914	-66.0301	-66.5219	-67.9038	-66.9519	-66.5079
78.8	-65.6227	-66.5902	-65.9869	-66.5855	-68.0808	-66.865	-66.4314
78.85	-65.5049	-66.5464	-66.0744	-66.7309	-68.2423	-66.7991	-66.3646
78.9	-65.3219	-66.4188	-66.3045	-66.8815	-68.3383	-66.7437	-66.2868
78.95	-65.1934	-66.198	-66.5706	-66.9894	-68.2927	-66.717	-66.2492
79	-65.1438	-65.9729	-66.6778	-67.0262	-68.1121	-66.7242	-66.3103
79.05	-65.1093	-65.8518	-66.5571	-66.9767	-67.9048	-66.7455	-66.4256
79.1	-65.0856	-65.8574	-66.3259	-66.8619	-67.7402	-66.8057	-66.5109
79.15	-65.1158	-65.9373	-66.1152	-66.7246	-67.6336	-66.9223	-66.5629
79.2	-65.1936	-66.0348	-65.9863	-66.5916	-67.6327	-67.0213	-66.6223
79.25	-65.2766	-66.1006	-65.9927	-66.4957	-67.7612	-67.0097	-66.6725
79.3	-65.3239	-66.1029	-66.119	-66.4732	-67.8937	-66.9226	-66.6748
79.35	-65.3	-66.0245	-66.2491	-66.5127	-67.8963	-66.8796	-66.6513
79.4	-65.1855	-65.862	-66.2704	-66.5541	-67.8334	-66.9154	-66.6478
79.45	-65.0258	-65.6612	-66.1978	-66.5395	-67.8566	-66.9559	-66.6396
79.5	-64.8994	-65.528	-66.1515	-66.4567	-67.9612	-66.9622	-66.5829
79.55	-64.8279	-65.5477	-66.1973	-66.3184	-68.0176	-66.9869	-66.5209
79.6	-64.7607	-65.7025	-66.271	-66.1638	-67.9779	-67.0724	-66.5328
79.65	-64.6724	-65.904	-66.2613	-66.0712	-67.9314	-67.1781	-66.5733
79.7	-64.6307	-66.0367	-66.1558	-66.124	-67.9452	-67.255	-66.5304
79.75	-64.7102	-66.0319	-66.0314	-66.3011	-67.9619	-67.3395	-66.424
79.8	-64.8833	-65.9156	-65.9619	-66.4562	-67.923	-67.5061	-66.394
79.85	-65.0174	-65.7848	-65.9797	-66.4989	-67.861	-67.7176	-66.4436
79.9	-65.0242	-65.7425	-66.037	-66.4708	-67.8128	-67.8325	-66.4342
79.95	-64.933	-65.8211	-66.0496	-66.4277	-67.7664	-67.7846	-66.3253
80	-64.8322	-65.9699	-65.9842	-66.3708	-67.7357	-67.6275	-66.2089
80.05	-64.804	-66.0909	-65.8681	-66.3247	-67.7474	-67.4441	-66.1325
80.1	-64.8725	-66.1033	-65.7401	-66.3416	-67.7583	-67.3077	-66.0741
80.15	-64.9923	-65.97	-65.6612	-66.4179	-67.6889	-67.271	-66.0616
80.2	-65.0781	-65.747	-65.7061	-66.4851	-67.5686	-67.3074	-66.1674
80.25	-65.0769	-65.6111	-65.8221	-66.4677	-67.5055	-67.3359	-66.3734
80.3	-64.9893	-65.6953	-65.8632	-66.3593	-67.5179	-67.3223	-66.5589
80.35	-64.8477	-65.9185	-65.7863	-66.2089	-67.5227	-67.321	-66.6573
80.4	-64.7063	-66.0596	-65.6983	-66.0808	-67.4937	-67.3649	-66.6944
80.45	-64.6209	-66.022	-65.7044	-66.0314	-67.4662	-67.4207	-66.6996
80.5	-64.6048	-65.917	-65.7672	-66.0978	-67.4283	-67.4666	-66.6657
80.55	-64.6108	-65.8651	-65.8157	-66.2478	-67.3396	-67.5097	-66.6207
80.6	-64.6097	-65.8744	-65.8591	-66.3972	-67.234	-67.5085	-66.6246
80.65	-64.5903	-65.8994	-65.9128	-66.5041	-67.175	-67.4197	-66.6418
80.7	-64.5125	-65.917	-65.9512	-66.6117	-67.1439	-67.2932	-66.5727
80.75	-64.3787	-65.9056	-65.9273	-66.7218	-67.079	-67.2177	-66.4668
80.8	-64.2525	-65.878	-65.8483	-66.7618	-67.0079	-67.1975	-66.5142
80.85	-64.1887	-65.9244	-65.7891	-66.7056	-67.0081	-67.181	-66.7433
80.9	-64.1765	-66.0941	-65.7897	-66.6183	-67.098	-67.1831	-66.9637
80.95	-64.1887	-66.2931	-65.8203	-66.5464	-67.2222	-67.2362	-67.0142
81	-64.2215	-66.3538	-65.838	-66.4925	-67.3152	-67.2938	-66.9042
81.05	-64.2737	-66.2546	-65.8581	-66.4767	-67.3477	-67.2963	-66.7314
81.1	-64.3462	-66.1633	-65.9083	-66.5228	-67.3312	-67.2888	-66.5929
81.15	-64.4181	-66.1663	-65.9457	-66.5716	-67.282	-67.3359	-66.5738
81.2	-64.4553	-66.1732	-65.9511	-66.5432	-67.2273	-67.3914	-66.7028
81.25	-64.4338	-66.1018	-65.9519	-66.4669	-67.2015	-67.3539	-66.9013
81.3	-64.3816	-66.0109	-65.9351	-66.4446	-67.2063	-67.2134	-67.0124
81.35	-64.3811	-65.9924	-65.9034	-66.5054	-67.2259	-67.0597	-66.9606
81.4	-64.4407	-66.0087	-65.889	-66.5959	-67.2802	-66.9711	-66.8233
81.45	-64.4684	-66.0054	-65.8929	-66.6746	-67.3827	-66.9896	-66.7112
81.5	-64.4035	-66.037	-65.8938	-66.7476	-67.4716	-67.1199	-66.6543
81.55	-64.2987	-66.135	-65.8829	-66.814	-67.4677	-67.3012	-66.6587
81.6	-64.2486	-66.2241	-65.91	-66.8427	-67.3895	-67.4188	-66.7523
81.65	-64.2322	-66.2403	-66.0018	-66.8503	-67.3483	-67.4199	-66.8541
81.7	-64.1694	-66.2641	-66.0878	-66.9061	-67.4106	-67.3459	-66.8101
81.75	-64.0853	-66.3891	-66.1377	-67.0196	-67.5398	-67.2569	-66.6255
81.8	-64.0752	-66.5259	-66.1728	-67.0951	-67.6673	-67.1848	-66.4967
81.85	-64.1299	-66.5338	-66.158	-67.0818	-67.7751	-67.1388	-66.5645
81.9	-64.122	-66.4069	-66.0497	-67.0345	-67.8755	-67.1235	-66.7335
81.95	-64.0448	-66.247	-65.9183	-66.9965	-67.9432	-67.1227	-66.8478
82	-64.0364	-66.1483	-65.8663	-66.9268	-67.9164	-67.111	-66.8686
82.05	-64.0976	-66.1165	-65.8503	-66.8081	-67.805	-67.0647	-66.8425
82.1	-64.0819	-66.1247	-65.758	-66.7005	-67.6991	-67.0013	-66.8312
82.15	-63.9561	-66.1531	-65.6429	-66.6435	-67.6442	-67.0003	-66.8618
82.2	-63.8786	-66.1826	-65.6563	-66.5941	-67.5929	-67.1174	-66.9131
82.25	-63.965	-66.2308	-65.8194	-66.5246	-67.5303	-67.2915	-66.9217
82.3	-64.095	-66.3099	-66.0205	-66.4814	-67.5266	-67.3771	-66.856
82.35	-64.1386	-66.3804	-66.188	-66.5086	-67.5935	-67.3105	-66.7661
82.4	-64.1399	-66.3935	-66.3178	-66.6078	-67.653	-67.1689	-66.7157
82.45	-64.1558	-66.3795	-66.3913	-66.7659	-67.6801	-67.0766	-66.7087
82.5	-64.1728	-66.417	-66.3835	-66.9705	-67.7157	-67.1105	-66.697
82.55	-64.1828	-66.5169	-66.3188	-67.15	-67.727	-67.2604	-66.682
82.6	-64.2248	-66.5984	-66.2542	-67.1976	-67.6421	-67.456	-66.7132
82.65	-64.2931	-66.5892	-66.198	-67.0931	-67.4876	-67.5744	-66.7912
82.7	-64.3371	-66.5031	-66.1363	-66.9474	-67.3762	-67.5259	-66.884
82.75	-64.3478	-66.372	-66.1041	-66.8523	-67.3489	-67.3714	-66.9583
82.8	-64.3589	-66.1975	-66.1606	-66.7912	-67.3448	-67.2758	-66.9897
82.85	-64.3773	-66.0214	-66.2863	-66.7536	-67.341	-67.3065	-66.9834
82.9	-64.3947	-65.9602	-66.3725	-66.7899	-67.3886	-67.3566	-66.9774
82.95	-64.4328	-66.0643	-66.3783	-66.9071	-67.4953	-67.3398	-67.0011
83	-64.4837	-66.2422	-66.3805	-67.0317	-67.5649	-67.2954	-67.0003
83.05	-64.4386	-66.356	-66.4256	-67.1	-67.5516	-67.2814	-66.9196
83.1	-64.1954	-66.3122	-66.4282	-67.0684	-67.5247	-67.306	-66.8271
83.15	-63.8645	-66.1243	-66.3058	-66.8811	-67.5171	-67.3462	-66.8252
83.2	-63.6776	-65.9126	-66.1154	-66.5352	-67.4894	-67.3937	-66.9196
83.25	-63.7069	-65.808	-65.9676	-66.1806	-67.4797	-67.4098	-66.9858
83.3	-63.8211	-65.8231	-65.9327	-66.0246	-67.5962	-67.355	-66.914
83.35	-63.8657	-65.8698	-66.0242	-66.1226	-67.8158	-67.3083	-66.7681
83.4	-63.7984	-65.9044	-66.2065	-66.3701	-67.9842	-67.3773	-66.6652
83.45	-63.6549	-65.9578	-66.3976	-66.6243	-68.0041	-67.519	-66.6391
83.5	-63.5173	-66.0845	-66.4774	-66.7742	-67.9165	-67.5854	-66.66
83.55	-63.4731	-66.2652	-66.3917	-66.7314	-67.8041	-67.542	-66.6756
83.6	-63.541	-66.3988	-66.1996	-66.5042	-67.7168	-67.4883	-66.6736
83.65	-63.6397	-66.4215	-66.0104	-66.2581	-67.7038	-67.454	-66.6441
83.7	-63.6505	-66.3336	-65.8982	-66.1812	-67.7867	-67.3871	-66.5713
83.75	-63.6049	-66.1932	-65.9006	-66.297	-67.9115	-67.2933	-66.4839
83.8	-63.6698	-66.0867	-66.0192	-66.4549	-67.9552	-67.2614	-66.4284
83.85	-63.8913	-66.0646	-66.2074	-66.5237	-67.855	-67.344	-66.3866
83.9	-64.1115	-66.1133	-66.3964	-66.4936	-67.7163	-67.4565	-66.3182
83.95	-64.1838	-66.165	-66.5263	-66.4273	-67.6938	-67.5254	-66.2436
84	-64.1577	-66.1997	-66.563	-66.3902	-67.8146	-67.5938	-66.2297
84.05	-64.1457	-66.2405	-66.517	-66.3951	-67.9668	-67.6727	-66.2888
84.1	-64.1729	-66.2596	-66.4232	-66.4232	-68.0418	-67.6964	-66.3514
84.15	-64.1882	-66.1991	-66.2982	-66.4498	-67.9965	-67.6246	-66.3628
84.2	-64.1131	-66.0885	-66.1588	-66.4448	-67.8667	-67.5165	-66.3602
84.25	-63.918	-66.0253	-66.0385	-66.3918	-67.799	-67.4677	-66.4003
84.3	-63.6611	-66.0591	-65.9496	-66.3524	-67.8976	-67.4709	-66.4368
84.35	-63.4862	-66.1628	-65.8533	-66.4284	-68.0748	-67.5059	-66.4125
84.4	-63.506	-66.2712	-65.733	-66.5702	-68.1569	-67.6069	-66.3988
84.45	-63.6819	-66.3158	-65.6407	-66.6064	-68.0966	-67.7267	-66.5052
84.5	-63.8703	-66.2499	-65.6384	-66.498	-67.9844	-67.7719	-66.6666
84.55	-63.9586	-66.0612	-65.7122	-66.4117	-67.8655	-67.7362	-66.7042
84.6	-63.9312	-65.7812	-65.776	-66.4748	-67.7489	-67.6687	-66.5865
84.65	-63.826	-65.5142	-65.7738	-66.5911	-67.703	-67.5839	-66.4366
84.7	-63.6929	-65.3825	-65.7328	-66.641	-67.7949	-67.4597	-66.3634
84.75	-63.5718	-65.3996	-65.6871	-66.65	-67.9968	-67.3503	-66.3731
84.8	-63.4661	-65.4222	-65.6491	-66.6712	-68.1607	-67.3571	-66.4246
84.85	-63.3229	-65.3175	-65.6319	-66.6941	-68.151	-67.4479	-66.5107
84.9	-63.1412	-65.1358	-65.6234	-66.6948	-67.958	-67.5065	-66.5764
84.95	-63.0325	-65.0465	-65.5993	-66.6858	-67.6725	-67.4775	-66.5539
85	-63.0578	-65.1101	-65.605	-66.6458	-67.4193	-67.4037	-66.4952
85.05	-63.101	-65.2347	-65.7094	-66.5372	-67.322	-67.3547	-66.5012
85.1	-63.0431	-65.3254	-65.8726	-66.3945	-67.3994	-67.3194	-66.5552
85.15	-62.9203	-65.3575	-66.001	-66.2652	-67.5101	-67.2433	-66.5363
85.2	-62.863	-65.3142	-66.0681	-66.1701	-67.5163	-67.1455	-66.4327
85.25	-62.9283	-65.1978	-66.0972	-66.1515	-67.454	-67.0935	-66.3697
85.3	-63.0619	-65.0525	-66.1024	-66.2737	-67.4192	-67.1215	-66.4199
85.35	-63.1799	-64.9297	-66.1	-66.5287	-67.4257	-67.1918	-66.5383
85.4	-63.253	-64.8308	-66.1165	-66.7417	-67.4536	-67.2248	-66.6361
85.45	-63.275	-64.7411	-66.1616	-66.7503	-67.5281	-67.1702	-66.6594
85.5	-63.2438	-64.6974	-66.2086	-66.6259	-67.6568	-67.0964	-66.5865
85.55	-63.1875	-64.7464	-66.2313	-66.5401	-67.7479	-67.1469	-66.4682
85.6	-63.1517	-64.8239	-66.2487	-66.5411	-67.7076	-67.3821	-66.4332
85.65	-63.1254	-64.8167	-66.308	-66.5443	-67.5489	-67.6956	-66.5551
85.7	-63.072	-64.7472	-66.3956	-66.5181	-67.3871	-67.9111	-66.767
85.75	-63.0116	-64.7673	-66.4338	-66.5382	-67.3292	-67.9497	-66.965
85.8	-63.0082	-64.9293	-66.3638	-66.5896	-67.3625	-67.8503	-67.1193
85.85	-63.0502	-65.1159	-66.214	-66.6062	-67.4048	-67.7073	-67.238
85.9	-63.0513	-65.2242	-66.0302	-66.6325	-67.4505	-67.5951	-67.2803
85.95	-62.9683	-65.2724	-65.8455	-66.7075	-67.5739	-67.5295	-67.1938
86	-62.863	-65.2947	-65.7304	-66.7925	-67.7221	-67.4879	-67.0189
86.05	-62.8046	-65.2903	-65.7467	-66.8426	-67.7226	-67.4399	-66.879
86.1	-62.7794	-65.2899	-65.8183	-66.8564	-67.5637	-67.3973	-66.8464
86.15	-62.7309	-65.3493	-65.8046	-66.8913	-67.3918	-67.4021	-66.8443
86.2	-62.6751	-65.4406	-65.7186	-66.948	-67.2942	-67.4688	-66.765
86.25	-62.6728	-65.4691	-65.696	-66.9651	-67.242	-67.5347	-66.637
86.3	-62.7297	-65.4418	-65.7674	-66.9657	-67.2031	-67.5105	-66.5754
86.35	-62.7585	-65.4504	-65.8439	-66.987	-67.2311	-67.3908	-66.6066
86.4	-62.6697	-65.4943	-65.9029	-66.9928	-67.3442	-67.2492	-66.6583
86.45	-62.4809	-65.4829	-66.0024	-66.9379	-67.4634	-67.1903	-66.6652
86.5	-62.2993	-65.4096	-66.1388	-66.8161	-67.5426	-67.2727	-66.61
86.55	-62.2115	-65.3624	-66.2263	-66.6995	-67.5807	-67.435	-66.5075
86.6	-62.2337	-65.3722	-66.2448	-66.6466	-67.5828	-67.5619	-66.4216
86.65	-62.3102	-65.3601	-66.2525	-66.5997	-67.5562	-67.6101	-66.4043
86.7	-62.3437	-65.2931	-66.2554	-66.5535	-67.5179	-67.5939	-66.4354
86.75	-62.2891	-65.2484	-66.1977	-66.5838	-67.5065	-67.511	-66.4738
86.8	-62.2052	-65.2797	-66.1006	-66.6422	-67.5103	-67.3977	-66.5165
86.85	-62.1913	-65.3217	-66.0652	-66.6254	-67.4941	-67.3122	-66.5447
86.9	-62.2885	-65.3057	-66.1342	-66.562	-67.4868	-67.2215	-66.5094
86.95	-62.4481	-65.2407	-66.2623	-66.5839	-67.5499	-67.0502	-66.4034
87	-62.5838	-65.1523	-66.3954	-66.7528	-67.6672	-66.8536	-66.2894
87.05	-62.6601	-65.0614	-66.5241	-66.9218	-67.7435	-66.7459	-66.2339
87.1	-62.6887	-65.0245	-66.6111	-66.9394	-67.7232	-66.7187	-66.2579
87.15	-62.7051	-65.0929	-66.5807	-66.8512	-67.6313	-66.6937	-66.3241
87.2	-62.7679	-65.2211	-66.4327	-66.7746	-67.5131	-66.7011	-66.3763
87.25	-62.8881	-65.3265	-66.2803	-66.7421	-67.3764	-66.8366	-66.4047
87.3	-62.9326	-65.3814	-66.2261	-66.7316	-67.2491	-67.0998	-66.4194
87.35	-62.7831	-65.3968	-66.2691	-66.7188	-67.2147	-67.3663	-66.4077
87.4	-62.5266	-65.3668	-66.3707	-66.6528	-67.3163	-67.526	-66.3959
87.45	-62.3583	-65.2852	-66.4753	-66.4989	-67.4863	-67.5546	-66.4494
87.5	-62.3302	-65.1601	-66.5051	-66.3476	-67.6634	-67.4703	-66.5573
87.55	-62.3548	-65.0107	-66.4123	-66.3201	-67.8396	-67.3098	-66.6334
87.6	-62.3971	-64.8786	-66.2464	-66.4318	-67.9612	-67.1769	-66.6443
87.65	-62.475	-64.8226	-66.1305	-66.6226	-67.96	-67.1582	-66.6435
87.7	-62.544	-64.8831	-66.1413	-66.8552	-67.8863	-67.1983	-66.6608
87.75	-62.5275	-65.0174	-66.2438	-67.0935	-67.841	-67.1854	-66.6783
87.8	-62.4652	-65.124	-66.3506	-67.2588	-67.816	-67.1213	-66.7045
87.85	-62.4759	-65.133	-66.4152	-67.2911	-67.7525	-67.1017	-66.7629
87.9	-62.5863	-65.075	-66.4209	-67.2113	-67.6897	-67.1875	-66.7994
87.95	-62.6998	-65.024	-66.3808	-67.0899	-67.7047	-67.3297	-66.7534
88	-62.7497	-64.9918	-66.3493	-66.9396	-67.7633	-67.44	-66.6589
88.05	-62.762	-64.97	-66.3556	-66.7566	-67.7804	-67.4878	-66.5881
88.1	-62.7522	-65.0063	-66.3728	-66.612	-67.7565	-67.4672	-66.5314
88.15	-62.7019	-65.1337	-66.3673	-66.5974	-67.7413	-67.3712	-66.4424
88.2	-62.6462	-65.2386	-66.3506	-66.6986	-67.7143	-67.2836	-66.3366
88.25	-62.6578	-65.1862	-66.3235	-66.8089	-67.6393	-67.3466	-66.275
88.3	-62.6868	-65.0176	-66.2474	-66.835	-67.5557	-67.5626	-66.2603
88.35	-62.6013	-64.875	-66.1353	-66.7335	-67.5363	-67.7651	-66.2443
88.4	-62.389	-64.8145	-66.0604	-66.5487	-67.5697	-67.8383	-66.2119
88.45	-62.1803	-64.7991	-66.068	-66.3835	-67.5666	-67.834	-66.1742
88.5	-62.0902	-64.7887	-66.1002	-66.3213	-67.4934	-67.8232	-66.1359
88.55	-62.1327	-64.7328	-66.0828	-66.381	-67.4345	-67.7962	-66.1318
88.6	-62.2487	-64.5999	-66.0499	-66.5127	-67.4606	-67.7562	-66.2188
88.65	-62.3246	-64.436	-66.0767	-66.6214	-67.5457	-67.7681	-66.3693
88.7	-62.2807	-64.3499	-66.1515	-66.6404	-67.6249	-67.8265	-66.4889
88.75	-62.1402	-64.4359	-66.1641	-66.596	-67.6658	-67.8455	-66.522
88.8	-62.0075	-64.6487	-66.0587	-66.5538	-67.6669	-67.7903	-66.4741
88.85	-61.9936	-64.8161	-65.8954	-66.5143	-67.652	-67.7115	-66.3606
88.9	-62.1453	-64.7879	-65.7416	-66.4308	-67.6514	-67.6212	-66.2003
88.95	-62.4157	-64.5835	-65.6622	-66.3414	-67.6851	-67.4866	-66.0286
89	-62.6624	-64.3656	-65.7194	-66.3411	-67.7217	-67.3519	-65.8966
89.05	-62.7566	-64.2664	-65.9135	-66.4127	-67.7136	-67.3192	-65.8727
89.1	-62.6751	-64.2913	-66.1509	-66.4379	-67.6834	-67.3894	-66.007
89.15	-62.49	-64.3449	-66.2895	-66.3898	-67.6964	-67.4568	-66.2469
89.2	-62.3226	-64.3514	-66.277	-66.36	-67.7345	-67.4841	-66.4361
89.25	-62.2631	-64.3236	-66.1832	-66.4005	-67.7289	-67.5368	-66.4942
89.3	-62.2924	-64.2958	-66.1178	-66.4591	-67.6914	-67.6479	-66.4604
89.35	-62.2842	-64.2644	-66.1441	-66.4976	-67.7019	-67.7723	-66.3765
89.4	-62.1944	-64.1766	-66.2007	-66.5562	-67.7559	-67.8829	-66.2691
89.45	-62.1361	-64.0188	-66.2001	-66.6789	-67.7789	-67.9603	-66.2043
89.5	-62.1659	-63.8674	-66.1391	-66.8536	-67.7721	-67.9439	-66.2591
89.55	-62.209	-63.8067	-66.0574	-67.0344	-67.7947	-67.7866	-66.4121
89.6	-62.1895	-63.8301	-65.9954	-67.1867	-67.8248	-67.5561	-66.5419
89.65	-62.1208	-63.8162	-65.9736	-67.2676	-67.7821	-67.3823	-66.5493
89.7	-62.0645	-63.7123	-66.0147	-67.2378	-67.6455	-67.32	-66.4504
89.75	-62.0819	-63.6468	-66.1044	-67.1204	-67.4903	-67.3393	-66.3058
89.8	-62.192	-63.7378	-66.1505	-66.9999	-67.4142	-67.425	-66.1614
89.85	-62.2815	-63.9259	-66.1475	-66.9006	-67.469	-67.5997	-66.093
89.9	-62.214	-64.0661	-66.1855	-66.784	-67.6265	-67.8248	-66.1612
89.95	-62.0204	-64.1314	-66.2496	-66.6722	-67.7694	-67.9704	-66.3131
90	-61.8609	-64.1864	-66.2564	-66.6505	-67.7864	-67.9418	-66.3885
90.05	-61.8393	-64.1991	-66.1732	-66.7048	-67.7105	-67.803	-66.3114
90.1	-61.8581	-64.114	-66.0342	-66.7159	-67.6809	-67.6788	-66.2015
90.15	-61.7835	-63.9823	-65.8887	-66.6151	-67.743	-67.6179	-66.2019
90.2	-61.6771	-63.9212	-65.7696	-66.461	-67.8095	-67.6301	-66.3075
90.25	-61.6826	-63.9934	-65.736	-66.3336	-67.806	-67.7238	-66.41
90.3	-61.7942	-64.102	-65.8468	-66.2607	-67.7695	-67.8638	-66.4676
90.35	-61.8582	-64.1382	-66.087	-66.2717	-67.7861	-67.9577	-66.489
90.4	-61.81	-64.1414	-66.3535	-66.389	-67.8713	-67.9326	-66.4706
90.45	-61.7584	-64.1601	-66.5322	-66.5692	-67.9207	-67.7689	-66.4705
90.5	-61.7669	-64.161	-66.5854	-66.733	-67.8246	-67.5123	-66.5529
90.55	-61.7813	-64.0991	-66.5074	-66.8652	-67.5989	-67.306	-66.6522
90.6	-61.7546	-64.0048	-66.3067	-67.0016	-67.3767	-67.3212	-66.618
90.65	-61.7361	-63.9202	-66.097	-67.1398	-67.2827	-67.5722	-66.4537
90.7	-61.795	-63.8229	-66.0501	-67.1971	-67.3402	-67.8348	-66.3634
90.75	-61.8644	-63.7087	-66.1572	-67.1199	-67.487	-67.8893	-66.454
90.8	-61.8404	-63.638	-66.2463	-66.9727	-67.6224	-67.7485	-66.6058
90.85	-61.7255	-63.6089	-66.2444	-66.8572	-67.7084	-67.5722	-66.6737
90.9	-61.5929	-63.5643	-66.2423	-66.7993	-67.817	-67.4835	-66.6809
90.95	-61.5044	-63.5297	-66.2891	-66.7989	-68.0118	-67.5055	-66.7219
91	-61.4677	-63.5848	-66.2782	-66.9093	-68.1768	-67.6009	-66.7759
91.05	-61.4329	-63.6892	-66.1293	-67.1331	-68.1263	-67.691	-66.7851
91.1	-61.3434	-63.7321	-65.9224	-67.3428	-67.8561	-67.7076	-66.7436
91.15	-61.1785	-63.7243	-65.8002	-67.4223	-67.5418	-67.6568	-66.6646
91.2	-60.9986	-63.7482	-65.8165	-67.413	-67.3405	-67.5979	-66.5552
91.25	-60.9065	-63.7978	-65.9074	-67.3776	-67.299	-67.5817	-66.4193
91.3	-60.9506	-63.8091	-65.9673	-67.2739	-67.4028	-67.5722	-66.3171
91.35	-61.0767	-63.8141	-65.9149	-67.0698	-67.5595	-67.4843	-66.3167
91.4	-61.2169	-63.896	-65.8012	-66.8524	-67.6361	-67.319	-66.3981
91.45	-61.3602	-64.0151	-65.7993	-66.7467	-67.5666	-67.1925	-66.4949
91.5	-61.4944	-64.0322	-66.0057	-66.7903	-67.4258	-67.196	-66.5559
91.55	-61.5555	-63.901	-66.2937	-66.9416	-67.3708	-67.2763	-66.5989
91.6	-61.4902	-63.7564	-66.4274	-67.123	-67.4462	-67.3541	-66.6718
91.65	-61.3743	-63.7475	-66.3585	-67.2627	-67.5273	-67.4163	-66.7345
91.7	-61.3398	-63.8949	-66.2501	-67.3256	-67.5058	-67.4645	-66.7167
91.75	-61.4026	-64.1006	-66.2515	-67.3245	-67.4597	-67.4972	-66.616
91.8	-61.4692	-64.2095	-66.3471	-67.2938	-67.5137	-67.4735	-66.5204
91.85	-61.4762	-64.1395	-66.4064	-67.259	-67.6289	-67.352	-66.5678
91.9	-61.4459	-63.9688	-66.35	-67.2495	-67.6776	-67.1806	-66.7538
91.95	-61.3932	-63.8823	-66.2026	-67.2828	-67.6636	-67.0655	-66.8798
92	-61.3259	-63.9653	-66.0473	-67.3379	-67.7	-67.0719	-66.7697
92.05	-61.3058	-64.0921	-65.9755	-67.3489	-67.7422	-67.159	-66.4973
92.1	-61.371	-64.1061	-66.0415	-67.2711	-67.6385	-67.2579	-66.291
92.15	-61.452	-64.0035	-66.1949	-67.144	-67.4179	-67.343	-66.2709
92.2	-61.472	-63.9091	-66.33	-67.0378	-67.284	-67.3858	-66.372
92.25	-61.48	-63.8942	-66.4078	-66.9922	-67.3412	-67.3956	-66.4795
92.3	-61.5373	-63.9132	-66.4545	-66.997	-67.473	-67.4179	-66.542
92.35	-61.5751	-63.9174	-66.4671	-67.0247	-67.5484	-67.4499	-66.5786
92.4	-61.506	-63.8755	-66.4141	-67.0399	-67.5476	-67.4458	-66.6191
92.45	-61.371	-63.7371	-66.3092	-67.0184	-67.4637	-67.3869	-66.6849
92.5	-61.3172	-63.4802	-66.2224	-66.9816	-67.3059	-67.3499	-66.7735
92.55	-61.3746	-63.2198	-66.2104	-66.957	-67.1891	-67.3927	-66.8443
92.6	-61.4136	-63.1271	-66.2688	-66.9474	-67.2255	-67.4281	-66.8577
92.65	-61.3825	-63.2415	-66.3653	-66.9287	-67.3233	-67.4	-66.7966
92.7	-61.3489	-63.4653	-66.4679	-66.8793	-67.3351	-67.3656	-66.6771
92.75	-61.32	-63.7261	-66.5291	-66.8146	-67.3194	-67.3385	-66.5379
92.8	-61.2209	-63.9762	-66.5221	-66.7924	-67.4143	-67.2856	-66.4451
92.85	-61.069	-64.0902	-66.489	-66.8513	-67.5901	-67.2148	-66.4427
92.9	-60.9717	-63.95	-66.4915	-66.9239	-67.68	-67.196	-66.4956
92.95	-60.98	-63.6329	-66.5098	-66.9266	-67.6313	-67.2463	-66.5216
93	-61.059	-63.3663	-66.4585	-66.8591	-67.5723	-67.2543	-66.4649
93.05	-61.1864	-63.2815	-66.3196	-66.784	-67.5959	-67.177	-66.3828
93.1	-61.3575	-63.3232	-66.1782	-66.777	-67.6721	-67.1336	-66.3937
93.15	-61.5209	-63.4003	-66.0973	-66.8273	-67.7281	-67.1862	-66.5146
93.2	-61.6121	-63.4723	-66.0476	-66.8597	-67.7522	-67.2552	-66.6329
93.25	-61.6422	-63.5091	-66.0014	-66.8268	-67.7745	-67.2356	-66.6358
93.3	-61.6576	-63.5029	-65.9984	-66.7304	-67.7878	-67.1434	-66.5454
93.35	-61.6487	-63.4804	-66.0287	-66.6265	-67.7718	-67.0882	-66.4625
93.4	-61.5783	-63.4594	-65.9904	-66.5598	-67.74	-67.1192	-66.4444
93.45	-61.4866	-63.4365	-65.8496	-66.528	-67.7145	-67.2092	-66.4624
93.5	-61.4791	-63.4175	-65.7048	-66.5292	-67.7298	-67.3204	-66.43
93.55	-61.577	-63.4289	-65.6407	-66.5792	-67.8157	-67.407	-66.3345
93.6	-61.6677	-63.4736	-65.6593	-66.6818	-67.9265	-67.4428	-66.2403
93.65	-61.6584	-63.4928	-65.7234	-66.781	-67.951	-67.4504	-66.1973
93.7	-61.5837	-63.4327	-65.7803	-66.8211	-67.8617	-67.4701	-66.2328
93.75	-61.5055	-63.335	-65.77	-66.8026	-67.7751	-67.4891	-66.3587
93.8	-61.4161	-63.2949	-65.6859	-66.7372	-67.8176	-67.4767	-66.5106
93.85	-61.2802	-63.3429	-65.5751	-66.6646	-67.95	-67.4691	-66.5458
93.9	-61.1185	-63.4294	-65.4899	-66.6182	-67.9892	-67.5507	-66.4106
93.95	-60.9879	-63.492	-65.4489	-66.5678	-67.8534	-67.708	-66.2055
94	-60.9288	-63.5142	-65.4401	-66.5171	-67.6731	-67.8118	-66.0637
94.05	-60.9439	-63.5113	-65.4218	-66.5186	-67.6339	-67.7837	-66.036
94.1	-60.985	-63.4555	-65.3638	-66.585	-67.7714	-67.667	-66.1167
94.15	-60.9892	-63.3054	-65.2689	-66.6534	-67.9683	-67.5485	-66.2757
94.2	-60.9638	-63.1272	-65.1634	-66.6519	-68.0851	-67.471	-66.4428
94.25	-60.9723	-63.06	-65.0661	-66.6353	-68.0373	-67.4384	-66.5325
94.3	-61.0251	-63.1321	-64.9699	-66.6893	-67.8916	-67.4363	-66.5409
94.35	-61.0436	-63.2337	-64.844	-66.7539	-67.7964	-67.435	-66.5341
94.4	-60.9812	-63.2504	-64.6955	-66.7486	-67.7704	-67.4039	-66.5402
94.45	-60.9018	-63.1634	-64.5593	-66.6908	-67.7323	-67.3266	-66.5426
94.5	-60.894	-63.028	-64.4565	-66.6333	-67.6662	-67.2548	-66.5637
94.55	-60.9452	-62.9124	-64.4096	-66.6065	-67.663	-67.2696	-66.6374
94.6	-60.9829	-62.8385	-64.4643	-66.597	-67.7751	-67.4015	-66.7506
94.65	-61.0183	-62.8104	-64.6339	-66.6144	-67.9024	-67.6128	-66.848
94.7	-61.1205	-62.8317	-64.8529	-66.6863	-67.9468	-67.7968	-66.8966
94.75	-61.2585	-62.8901	-65.0279	-66.7617	-67.9337	-67.85	-66.928
94.8	-61.3194	-62.9575	-65.0941	-66.8184	-67.9316	-67.7676	-66.9777
94.85	-61.2853	-63.0099	-65.0598	-66.89	-67.9389	-67.6697	-67.003
94.9	-61.2402	-62.9942	-64.9957	-66.908	-67.8843	-67.6558	-66.968
94.95	-61.2255	-62.8737	-64.9476	-66.832	-67.7981	-67.6754	-66.9226
95	-61.2071	-62.7056	-64.88	-66.7767	-67.7972	-67.63	-66.9034
95.05	-61.1831	-62.5827	-64.7783	-66.8071	-67.8709	-67.5479	-66.8953
95.1	-61.1871	-62.4905	-64.6991	-66.8584	-67.8915	-67.5359	-66.9312
95.15	-61.216	-62.3632	-64.6695	-66.8599	-67.7862	-67.5866	-67.0376
95.2	-61.2151	-62.2165	-64.6299	-66.8091	-67.6202	-67.5852	-67.1173
95.25	-61.1716	-62.1159	-64.5445	-66.7635	-67.4929	-67.4723	-67.0513
95.3	-61.1394	-62.0893	-64.5008	-66.7312	-67.4594	-67.3079	-66.9008
95.35	-61.1286	-62.1415	-64.6084	-66.6975	-67.5251	-67.1796	-66.8245
95.4	-61.0514	-62.2967	-64.8434	-66.7367	-67.6558	-67.1381	-66.8448
95.45	-60.8606	-62.5325	-65.0606	-66.8846	-67.7884	-67.1833	-66.8488
95.5	-60.6308	-62.7413	-65.1727	-67.0377	-67.8427	-67.2585	-66.7903
95.55	-60.4646	-62.819	-65.1724	-67.0781	-67.7751	-67.2794	-66.7316
95.6	-60.4005	-62.7869	-65.0361	-67.027	-67.6218	-67.2189	-66.7114
95.65	-60.4229	-62.7351	-64.753	-66.9921	-67.4589	-67.125	-66.6885
95.7	-60.5007	-62.6826	-64.4303	-67.0155	-67.3117	-67.049	-66.6689
95.75	-60.5887	-62.5633	-64.2617	-67.0393	-67.1511	-66.9819	-66.7014
95.8	-60.655	-62.3734	-64.3473	-67.0304	-66.9818	-66.9341	-66.7531
95.85	-60.7116	-62.239	-64.5918	-67.0354	-66.8938	-66.9636	-66.7314
95.9	-60.8044	-62.2654	-64.7723	-67.0962	-66.9549	-67.0691	-66.6395
95.95	-60.918	-62.4314	-64.7639	-67.1851	-67.1229	-67.1727	-66.5538
96	-60.9562	-62.6509	-64.6204	-67.2502	-67.3028	-67.2445	-66.496
96.05	-60.8605	-62.8543	-64.4497	-67.2703	-67.4481	-67.3032	-66.4231
96.1	-60.7001	-62.9532	-64.3521	-67.2227	-67.5428	-67.3482	-66.3342
96.15	-60.5588	-62.8776	-64.3778	-67.084	-67.5776	-67.378	-66.2724
96.2	-60.425	-62.6923	-64.4534	-66.9037	-67.5853	-67.4076	-66.2532
96.25	-60.2801	-62.5592	-64.4253	-66.8134	-67.6345	-67.4322	-66.2831
96.3	-60.1946	-62.5581	-64.2764	-66.8664	-67.7313	-67.4462	-66.4045
96.35	-60.249	-62.6294	-64.1763	-66.9738	-67.7951	-67.4562	-66.6316
96.4	-60.4079	-62.7036	-64.2442	-67.0537	-67.7871	-67.4586	-66.8732
96.45	-60.5771	-62.7632	-64.4234	-67.109	-67.7766	-67.4712	-67.0271
96.5	-60.7038	-62.7892	-64.5973	-67.1292	-67.8163	-67.5294	-67.0901
96.55	-60.7732	-62.7381	-64.7162	-67.0526	-67.8554	-67.618	-67.1105
96.6	-60.7414	-62.6241	-64.7497	-66.9111	-67.8296	-67.6449	-67.0978
96.65	-60.5715	-62.5251	-64.6872	-66.8473	-67.7467	-67.5384	-67.0521
96.7	-60.3439	-62.4799	-64.6178	-66.9401	-67.6323	-67.3433	-67.0032
96.75	-60.2192	-62.4634	-64.6288	-67.1011	-67.4872	-67.1979	-66.9756
96.8	-60.2633	-62.4296	-64.66	-67.2045	-67.358	-67.1838	-66.9292
96.85	-60.3753	-62.3631	-64.5856	-67.2329	-67.3306	-67.2576	-66.8051
96.9	-60.4417	-62.2659	-64.4315	-67.2221	-67.4104	-67.2976	-66.6166
96.95	-60.4167	-62.1514	-64.3497	-67.1615	-67.4973	-67.2353	-66.4645
97	-60.2804	-62.0846	-64.4024	-67.0193	-67.5135	-67.1262	-66.4181
97.05	-60.0898	-62.1325	-64.5221	-66.8419	-67.4984	-67.0637	-66.4498
97.1	-60.0271	-62.2709	-64.6365	-66.7159	-67.5398	-67.0665	-66.554
97.15	-60.234	-62.3858	-64.7421	-66.669	-67.616	-67.0867	-66.7593
97.2	-60.5839	-62.4157	-64.8381	-66.6582	-67.6388	-67.0609	-67.004
97.25	-60.7875	-62.3924	-64.8949	-66.6431	-67.6037	-66.9682	-67.1579
97.3	-60.7042	-62.345	-64.9205	-66.6123	-67.5562	-66.8812	-67.1785
97.35	-60.4716	-62.287	-64.9243	-66.6047	-67.5037	-66.9051	-67.0855
97.4	-60.3101	-62.2301	-64.8834	-66.6694	-67.4872	-67.0387	-66.8846
97.45	-60.2949	-62.1736	-64.7843	-66.7861	-67.5652	-67.1784	-66.6407
97.5	-60.3826	-62.1034	-64.6701	-66.8694	-67.688	-67.3062	-66.5075
97.55	-60.4901	-62.0527	-64.6069	-66.8897	-67.7284	-67.4727	-66.5728
97.6	-60.5266	-62.0997	-64.5707	-66.8883	-67.6541	-67.6143	-66.7256
97.65	-60.4615	-62.2083	-64.5116	-66.8759	-67.5613	-67.5792	-66.7942
97.7	-60.3816	-62.237	-64.4697	-66.8035	-67.5513	-67.3554	-66.742
97.75	-60.3895	-62.129	-64.4838	-66.6658	-67.6251	-67.1057	-66.6558
97.8	-60.423	-62.0017	-64.5062	-66.5425	-67.7279	-66.9858	-66.5834
97.85	-60.3591	-62.0154	-64.4712	-66.5015	-67.8207	-67.0319	-66.517
97.9	-60.2112	-62.1478	-64.4138	-66.4965	-67.8729	-67.1968	-66.4849
97.95	-60.1029	-62.2386	-64.3937	-66.45	-67.8534	-67.4249	-66.5184
98	-60.0982	-62.2199	-64.3244	-66.3669	-67.793	-67.6426	-66.5986
98.05	-60.1339	-62.1765	-64.1197	-66.31	-67.7898	-67.7774	-66.6787
98.1	-60.1639	-62.185	-63.9029	-66.3201	-67.8765	-67.82	-66.7197
98.15	-60.2294	-62.1977	-63.8752	-66.4036	-67.9798	-67.8061	-66.6686
98.2	-60.3604	-62.1748	-64.0442	-66.5562	-68.0456	-67.7156	-66.4954
98.25	-60.5184	-62.146	-64.2198	-66.7513	-68.0835	-67.5437	-66.2741
98.3	-60.6198	-62.1304	-64.3143	-66.9387	-68.0926	-67.4219	-66.132
98.35	-60.6205	-62.1439	-64.4019	-67.0428	-68.0774	-67.4916	-66.1326
98.4	-60.5295	-62.1681	-64.4554	-67.0177	-68.0819	-67.6981	-66.1922
98.45	-60.4143	-62.1533	-64.3838	-66.9273	-68.1445	-67.8415	-66.1757
98.5	-60.3837	-62.0918	-64.2154	-66.9029	-68.2187	-67.8383	-66.0887
98.55	-60.4467	-61.9927	-64.0462	-66.9541	-68.1951	-67.7491	-66.0888
98.6	-60.4979	-61.8652	-63.9111	-66.9432	-68.0209	-67.5971	-66.2645
98.65	-60.4564	-61.7407	-63.8019	-66.7833	-67.7749	-67.372	-66.4599
98.7	-60.3486	-61.6721	-63.7483	-66.5391	-67.5646	-67.1754	-66.4872
98.75	-60.2841	-61.6806	-63.7828	-66.3188	-67.4254	-67.1669	-66.3974
98.8	-60.3136	-61.6925	-63.8479	-66.1909	-67.3707	-67.3356	-66.3668
98.85	-60.3931	-61.6482	-63.85	-66.189	-67.4339	-67.5113	-66.4246
98.9	-60.4995	-61.5429	-63.7842	-66.2895	-67.602	-67.5887	-66.4287
98.95	-60.6303	-61.3878	-63.7262	-66.4389	-67.787	-67.6046	-66.3206
99	-60.7223	-61.226	-63.6842	-66.5979	-67.9211	-67.5891	-66.2085
99.05	-60.6531	-61.1134	-63.6103	-66.7504	-67.9915	-67.5303	-66.1896
99.1	-60.431	-61.0591	-63.532	-66.8612	-68.0103	-67.5032	-66.2442
99.15	-60.2615	-61.0487	-63.5524	-66.8781	-67.9873	-67.5893	-66.3014
99.2	-60.2922	-61.0728	-63.7064	-66.7784	-67.9299	-67.7173	-66.3508
99.25	-60.4662	-61.1086	-63.8836	-66.6168	-67.8332	-67.7297	-66.4078
99.3	-60.6399	-61.1333	-63.9485	-66.4963	-67.69	-67.6066	-66.4678
99.35	-60.7453	-61.1566	-63.8808	-66.489	-67.5565	-67.4979	-66.5241
99.4	-60.7952	-61.1879	-63.775	-66.5877	-67.5488	-67.5119	-66.5306
99.45	-60.8188	-61.2438	-63.709	-66.7159	-67.7308	-67.6099	-66.4377
99.5	-60.8434	-61.3325	-63.6909	-66.8121	-67.9938	-67.7	-66.2744
99.55	-60.8721	-61.3908	-63.7005	-66.8555	-68.1464	-67.7565	-66.1472
99.6	-60.867	-61.3633	-63.6894	-66.8415	-68.1212	-67.7956	-66.1671
99.65	-60.7814	-61.2892	-63.6196	-66.7801	-68.0009	-67.8037	-66.3034
99.7	-60.6314	-61.2692	-63.5074	-66.7094	-67.8598	-67.784	-66.4373
99.75	-60.4915	-61.3357	-63.4233	-66.6358	-67.7314	-67.7559	-66.5281
99.8	-60.4323	-61.4227	-63.4246	-66.5467	-67.6822	-67.7202	-66.5757
99.85	-60.4493	-61.4702	-63.4651	-66.4983	-67.7352	-67.6787	-66.5498
[truncated: 49,614 more rows]
