# Supplementary material for: Intrinsic mechanical sensitivity of mammalian auditory neurons as a contributor to sound-driven neural activity
Source: eLife. 2022 Mar 10;11:e74948. doi: 10.7554/eLife.74948 (PMC8942473; doi:10.7554/eLife.74948)
Supplement: Figure 3—figure supplement 2—source data 1. [file elife-74948-fig3-figsupp2-data1.xls]

## Sheet: Figure 3-supplement data 2
T(ms)	0
	zero deg	45 deg	90 deg	135 deg	180 deg	225 deg	270 deg
0	-72.9275	-71.5276	-74.2845	-73.3992	-73.7871	-73.5911	-73.0423
0.05	-72.9514	-71.4691	-74.2553	-73.3972	-73.7688	-73.5735	-73.0552
0.1	-72.9637	-71.395	-74.2068	-73.3833	-73.7466	-73.5514	-73.0846
0.15	-72.9441	-71.3195	-74.1336	-73.3509	-73.7236	-73.5281	-73.1364
0.2	-72.8815	-71.2646	-74.0378	-73.3026	-73.7032	-73.5097	-73.2065
0.25	-72.7913	-71.247	-73.9305	-73.2527	-73.6891	-73.5039	-73.2797
0.3	-72.6959	-71.2566	-73.8141	-73.2031	-73.6743	-73.5036	-73.3252
0.35	-72.6456	-71.2996	-73.7172	-73.1761	-73.6844	-73.5264	-73.3489
0.4	-72.6362	-71.3414	-73.6229	-73.1483	-73.7068	-73.5472	-73.3343
0.45	-72.6579	-71.3672	-73.5207	-73.1103	-73.7345	-73.5518	-73.2928
0.5	-72.693	-71.379	-73.4061	-73.0657	-73.7554	-73.5327	-73.2484
0.55	-72.7246	-71.3913	-73.289	-73.0293	-73.7587	-73.4899	-73.2264
0.6	-72.7403	-71.4204	-73.1942	-73.0186	-73.7428	-73.4288	-73.243
0.65	-72.7332	-71.4748	-73.1517	-73.0429	-73.7179	-73.3576	-73.3008
0.7	-72.7019	-71.551	-73.1796	-73.0971	-73.6989	-73.2864	-73.3907
0.75	-72.6498	-71.6352	-73.2702	-73.1635	-73.6951	-73.2266	-73.4993
0.8	-72.5851	-71.7089	-73.3898	-73.2187	-73.7057	-73.1899	-73.6156
0.85	-72.5187	-71.7567	-73.4939	-73.2421	-73.7235	-73.1844	-73.7352
0.9	-72.4625	-71.7717	-73.5474	-73.2202	-73.7422	-73.211	-73.8567
0.95	-72.4249	-71.7568	-73.5379	-73.1509	-73.7609	-73.2622	-73.9746
1	-72.4068	-71.7222	-73.4734	-73.0443	-73.7845	-73.3256	-74.076
1.05	-72.4007	-71.6797	-73.3737	-72.9211	-73.8184	-73.3888	-74.1429
1.1	-72.3933	-71.6377	-73.262	-72.8053	-73.8622	-73.4432	-74.1609
1.15	-72.3728	-71.599	-73.1606	-72.7158	-73.9066	-73.4862	-74.1271
1.2	-72.3347	-71.5649	-73.0901	-72.6591	-73.9383	-73.5212	-74.0518
1.25	-72.2843	-71.5405	-73.067	-72.6294	-73.9479	-73.5541	-73.9539
1.3	-72.2332	-71.5342	-73.1001	-72.6148	-73.9348	-73.5891	-73.8537
1.35	-72.1926	-71.5528	-73.1854	-72.605	-73.906	-73.6263	-73.7668
1.4	-72.1689	-71.5928	-73.3039	-72.5961	-73.8727	-73.6624	-73.702
1.45	-72.163	-71.639	-73.4251	-72.5913	-73.848	-73.6931	-73.6629
1.5	-72.1737	-71.6696	-73.5177	-72.5972	-73.843	-73.7168	-73.6493
1.55	-72.2001	-71.6667	-73.5615	-72.6192	-73.8639	-73.7355	-73.6588
1.6	-72.2424	-71.6251	-73.5545	-72.6565	-73.91	-73.7534	-73.6875
1.65	-72.2993	-71.555	-73.5117	-72.7016	-73.9761	-73.7739	-73.7292
1.7	-72.3655	-71.477	-73.4563	-72.7445	-74.0558	-73.797	-73.7746
1.75	-72.4321	-71.4135	-73.4081	-72.7789	-74.1422	-73.8203	-73.8119
1.8	-72.4903	-71.3811	-73.3749	-72.805	-74.2257	-73.841	-73.8301
1.85	-72.5365	-71.387	-73.3519	-72.8273	-74.2926	-73.857	-73.8242
1.9	-72.5734	-71.4272	-73.3288	-72.8486	-74.3277	-73.8639	-73.7994
1.95	-72.6057	-71.4894	-73.2978	-72.866	-74.3203	-73.8544	-73.7715
2	-72.6335	-71.5576	-73.2581	-72.8728	-74.2697	-73.821	-73.7635
2.05	-72.649	-71.6173	-73.2159	-72.8653	-74.1877	-73.7633	-73.7954
2.1	-72.6427	-71.6575	-73.1812	-72.8476	-74.0931	-73.6917	-73.8736
2.15	-72.6141	-71.6696	-73.1618	-72.8311	-74.0038	-73.6267	-73.9838
2.2	-72.5779	-71.6484	-73.1595	-72.8267	-73.9293	-73.5907	-74.0948
2.25	-72.5582	-71.5959	-73.1694	-72.838	-73.8708	-73.5993	-74.1697
2.3	-72.5746	-71.525	-73.1846	-72.8596	-73.8251	-73.6553	-74.182
2.35	-72.6315	-71.4578	-73.202	-72.8827	-73.7905	-73.7473	-74.1261
2.4	-72.7175	-71.416	-73.2241	-72.9007	-73.7695	-73.8533	-74.0202
2.45	-72.8154	-71.4103	-73.2558	-72.9131	-73.7655	-73.948	-73.8979
2.5	-72.9127	-71.4337	-73.2986	-72.9239	-73.7758	-74.0117	-73.7926
2.55	-73.0057	-71.4655	-73.347	-72.9372	-73.7868	-74.0358	-73.7224
2.6	-73.0927	-71.4833	-73.3925	-72.9517	-73.78	-74.0225	-73.6851
2.65	-73.1655	-71.4764	-73.4297	-72.9624	-73.7444	-73.9796	-73.6668
2.7	-73.2077	-71.4495	-73.4597	-72.9667	-73.6845	-73.9174	-73.6585
2.75	-73.2038	-71.4167	-73.4859	-72.971	-73.618	-73.8498	-73.6641
2.8	-73.1512	-71.3895	-73.5085	-72.9889	-73.5643	-73.7948	-73.6956
2.85	-73.0647	-71.3697	-73.5224	-73.0319	-73.5355	-73.7703	-73.7576
2.9	-72.9686	-71.3517	-73.5224	-73.1016	-73.5324	-73.7858	-73.8368
2.95	-72.8849	-71.3307	-73.5108	-73.1892	-73.5476	-73.8348	-73.9034
3	-72.8246	-71.3102	-73.4981	-73.2808	-73.5682	-73.8963	-73.9267
3.05	-72.7877	-71.3016	-73.4983	-73.3627	-73.5799	-73.9431	-73.8904
3.1	-72.7678	-71.3155	-73.5201	-73.4241	-73.572	-73.9558	-73.8006
3.15	-72.7567	-71.3533	-73.5631	-73.4579	-73.5437	-73.9317	-73.6818
3.2	-72.7471	-71.403	-73.6181	-73.4616	-73.5083	-73.8849	-73.5665
3.25	-72.7345	-71.4437	-73.6709	-73.4397	-73.4891	-73.8365	-73.4824
3.3	-72.7191	-71.4542	-73.7067	-73.4031	-73.505	-73.802	-73.4427
3.35	-72.7051	-71.4215	-73.716	-73.3643	-73.5574	-73.7835	-73.4443
3.4	-72.6967	-71.3471	-73.6991	-73.3313	-73.6278	-73.7727	-73.4735
3.45	-72.6937	-71.2483	-73.6663	-73.304	-73.6898	-73.7606	-73.5172
3.5	-72.689	-71.1537	-73.6306	-73.2767	-73.7256	-73.747	-73.5683
3.55	-72.6728	-71.0919	-73.6012	-73.244	-73.7331	-73.741	-73.6252
3.6	-72.6369	-71.0815	-73.5835	-73.2039	-73.7236	-73.7535	-73.6867
3.65	-72.5785	-71.1248	-73.5828	-73.1569	-73.7129	-73.7875	-73.7478
3.7	-72.5029	-71.211	-73.6042	-73.1066	-73.7145	-73.8344	-73.7999
3.75	-72.424	-71.3232	-73.6483	-73.0605	-73.7356	-73.878	-73.8333
3.8	-72.3631	-71.447	-73.7069	-73.0284	-73.7751	-73.9026	-73.8422
3.85	-72.3411	-71.5727	-73.7644	-73.0171	-73.8244	-73.8996	-73.827
3.9	-72.3667	-71.6935	-73.8038	-73.0252	-73.8701	-73.8701	-73.7931
3.95	-72.4304	-71.8008	-73.8141	-73.0417	-73.9001	-73.8221	-73.7465
4	-72.5083	-71.8838	-73.7928	-73.0493	-73.9092	-73.7658	-73.6926
4.05	-72.5757	-71.9324	-73.7453	-73.0321	-73.9005	-73.7097	-73.6385
4.1	-72.6181	-71.9439	-73.6814	-72.986	-73.884	-73.6622	-73.5929
4.15	-72.6346	-71.925	-73.6128	-72.924	-73.873	-73.6334	-73.5646
4.2	-72.632	-71.89	-73.5518	-72.871	-73.8799	-73.6315	-73.5589
4.25	-72.6159	-71.8533	-73.5101	-72.8495	-73.9114	-73.6544	-73.5771
4.3	-72.5873	-71.8221	-73.4938	-72.8652	-73.9633	-73.6868	-73.6163
4.35	-72.5456	-71.7948	-73.4978	-72.9057	-74.0208	-73.7059	-73.6685
4.4	-72.4945	-71.7647	-73.507	-72.9489	-74.0628	-73.693	-73.721
4.45	-72.4439	-71.7257	-73.5047	-72.9761	-74.0703	-73.6427	-73.7585
4.5	-72.4062	-71.6769	-73.4821	-72.9811	-74.0358	-73.5641	-73.7688
4.55	-72.3884	-71.6233	-73.4428	-72.9723	-73.9668	-73.4751	-73.7474
4.6	-72.3877	-71.5738	-73.3998	-72.9673	-73.8826	-73.3933	-73.7007
4.65	-72.393	-71.5371	-73.3682	-72.9831	-73.8044	-73.329	-73.6446
4.7	-72.3918	-71.5182	-73.3554	-73.0268	-73.7456	-73.2838	-73.5988
4.75	-72.3808	-71.5174	-73.3567	-73.0903	-73.7078	-73.2537	-73.5786
4.8	-72.3708	-71.5297	-73.3574	-73.1543	-73.6834	-73.2345	-73.5895
4.85	-72.3808	-71.5469	-73.3422	-73.1981	-73.6622	-73.2266	-73.6254
4.9	-72.4243	-71.5618	-73.3034	-73.2102	-73.6374	-73.2351	-73.6737
4.95	-72.4969	-71.5726	-73.2429	-73.1937	-73.609	-73.2657	-73.7199
5	-72.5763	-71.586	-73.1701	-73.1621	-73.5824	-73.318	-73.7516
5.05	-72.6339	-71.6148	-73.0988	-73.1322	-73.5644	-73.381	-73.761
5.1	-72.6512	-71.6705	-73.0459	-73.1151	-73.5592	-73.437	-73.7475
5.15	-72.628	-71.7558	-73.0272	-73.113	-73.5683	-73.4695	-73.7201
5.2	-72.5785	-71.8593	-73.0524	-73.1208	-73.5912	-73.4715	-73.6961
5.25	-72.5199	-71.9582	-73.1178	-73.1322	-73.6273	-73.4485	-73.6923
5.3	-72.4658	-72.0274	-73.2025	-73.1447	-73.6755	-73.4158	-73.7143
5.35	-72.426	-72.0519	-73.2734	-73.1607	-73.7336	-73.3918	-73.7518
5.4	-72.4111	-72.035	-73.299	-73.1839	-73.7956	-73.3903	-73.7857
5.45	-72.4307	-71.9947	-73.2664	-73.2165	-73.8501	-73.4151	-73.8021
5.5	-72.487	-71.9524	-73.1885	-73.2589	-73.8841	-73.4594	-73.802
5.55	-72.57	-71.9207	-73.0972	-73.311	-73.8906	-73.5086	-73.7996
5.6	-72.6604	-71.8995	-73.0275	-73.3708	-73.8741	-73.5428	-73.8099
5.65	-72.7391	-71.8806	-73.0018	-73.4329	-73.8477	-73.5429	-73.8356
5.7	-72.7948	-71.8557	-73.0241	-73.4883	-73.824	-73.4989	-73.8632
5.75	-72.8249	-71.8223	-73.0832	-73.5281	-73.8089	-73.4194	-73.8716
5.8	-72.8323	-71.7841	-73.1601	-73.5469	-73.8019	-73.3313	-73.8468
5.85	-72.8231	-71.748	-73.2348	-73.5446	-73.8007	-73.269	-73.7929
5.9	-72.8053	-71.7187	-73.2911	-73.5235	-73.8029	-73.2557	-73.7318
5.95	-72.7857	-71.6972	-73.3192	-73.4851	-73.8056	-73.2921	-73.6927
6	-72.7662	-71.6815	-73.319	-73.4308	-73.8052	-73.3578	-73.6964
6.05	-72.744	-71.6681	-73.2992	-73.366	-73.7978	-73.4268	-73.7455
6.1	-72.7165	-71.6529	-73.2735	-73.3027	-73.7803	-73.4838	-73.8245
6.15	-72.6859	-71.6322	-73.2554	-73.254	-73.7501	-73.529	-73.9093
6.2	-72.6584	-71.6051	-73.2529	-73.2281	-73.7052	-73.5702	-73.9769
6.25	-72.6399	-71.5749	-73.2659	-73.2247	-73.6455	-73.6108	-74.0117
6.3	-72.6343	-71.5479	-73.2863	-73.2386	-73.5735	-73.6443	-74.0081
6.35	-72.6439	-71.5308	-73.3008	-73.2617	-73.4973	-73.659	-73.9723
6.4	-72.6697	-71.5286	-73.2989	-73.2826	-73.4291	-73.6482	-73.9191
6.45	-72.7095	-71.5418	-73.2801	-73.2871	-73.3829	-73.6177	-73.8657
6.5	-72.7567	-71.5653	-73.2574	-73.265	-73.3676	-73.5855	-73.8244
6.55	-72.8014	-71.5884	-73.2517	-73.2176	-73.3844	-73.5733	-73.799
6.6	-72.8338	-71.5971	-73.2779	-73.1595	-73.4259	-73.5955	-73.786
6.65	-72.8471	-71.5788	-73.3342	-73.111	-73.4796	-73.6527	-73.7779
6.7	-72.8387	-71.5262	-73.4008	-73.0875	-73.5316	-73.7336	-73.7665
6.75	-72.8106	-71.4431	-73.4504	-73.0918	-73.5701	-73.8212	-73.7461
6.8	-72.7683	-71.3462	-73.4632	-73.1136	-73.5869	-73.9013	-73.7122
6.85	-72.7204	-71.2612	-73.4365	-73.1354	-73.5782	-73.9655	-73.6594
6.9	-72.6774	-71.2106	-73.3839	-73.1408	-73.5443	-74.0092	-73.5808
6.95	-72.6506	-71.2014	-73.3272	-73.1201	-73.4916	-74.029	-73.4736
7	-72.6484	-71.2222	-73.2873	-73.0721	-73.4351	-74.0234	-73.3463
7.05	-72.6724	-71.2525	-73.2783	-73.0037	-73.3958	-73.9982	-73.2222
7.1	-72.7167	-71.2757	-73.3043	-72.9277	-73.3922	-73.9677	-73.1315
7.15	-72.7703	-71.2878	-73.3602	-72.8619	-73.4291	-73.9482	-73.0984
7.2	-72.8217	-71.2956	-73.4336	-72.8243	-73.4939	-73.9472	-73.1307
7.25	-72.8598	-71.3085	-73.5091	-72.8285	-73.562	-73.9575	-73.2163
7.3	-72.8755	-71.3308	-73.5724	-72.8772	-73.6104	-73.9627	-73.3279
7.35	-72.8646	-71.3594	-73.6148	-72.9603	-73.6282	-73.9497	-73.4334
7.4	-72.8297	-71.389	-73.635	-73.057	-73.6212	-73.9169	-73.5056
7.45	-72.7805	-71.4178	-73.6396	-73.1445	-73.6073	-73.8735	-73.5314
7.5	-72.7291	-71.4503	-73.6399	-73.2061	-73.6082	-73.8303	-73.5151
7.55	-72.6851	-71.4915	-73.6473	-73.2358	-73.6368	-73.7918	-73.4766
7.6	-72.6521	-71.5384	-73.6683	-73.2375	-73.69	-73.756	-73.4429
7.65	-72.6303	-71.5767	-73.7019	-73.2213	-73.7479	-73.7218	-73.4349
7.7	-72.6205	-71.5892	-73.7399	-73.2013	-73.7845	-73.6948	-73.4574
7.75	-72.6246	-71.5695	-73.7694	-73.191	-73.7827	-73.6864	-73.4963
7.8	-72.6413	-71.529	-73.7775	-73.1981	-73.7451	-73.7051	-73.5273
7.85	-72.6622	-71.4906	-73.7566	-73.2196	-73.6924	-73.7516	-73.5274
7.9	-72.6749	-71.4735	-73.7088	-73.2426	-73.6518	-73.8185	-73.4859
7.95	-72.6718	-71.484	-73.6456	-73.2527	-73.6419	-73.8938	-73.4087
8	-72.6541	-71.5147	-73.5813	-73.2436	-73.6643	-73.964	-73.3151
8.05	-72.6284	-71.5524	-73.5242	-73.2224	-73.7055	-74.0149	-73.2286
8.1	-72.6012	-71.5851	-73.4707	-73.2027	-73.7463	-74.0354	-73.1665
8.15	-72.5777	-71.6044	-73.4093	-73.1943	-73.7718	-74.0217	-73.134
8.2	-72.5634	-71.6071	-73.3298	-73.1987	-73.7767	-73.9804	-73.1253
8.25	-72.564	-71.5959	-73.2305	-73.2116	-73.7651	-73.9275	-73.1302
8.3	-72.5814	-71.5791	-73.1194	-73.2296	-73.746	-73.8822	-73.1417
8.35	-72.6097	-71.5659	-73.0101	-73.2528	-73.7284	-73.8576	-73.1591
8.4	-72.6355	-71.5611	-72.9188	-73.2828	-73.7189	-73.8554	-73.185
8.45	-72.6424	-71.5632	-72.8623	-73.3204	-73.7233	-73.867	-73.2198
8.5	-72.6215	-71.5689	-72.8546	-73.3643	-73.7463	-73.88	-73.2583
8.55	-72.5778	-71.5784	-72.9014	-73.4098	-73.7883	-73.8837	-73.293
8.6	-72.5275	-71.594	-72.9955	-73.4479	-73.8414	-73.8714	-73.319
8.65	-72.4866	-71.6159	-73.1164	-73.4668	-73.8923	-73.841	-73.3357
8.7	-72.4597	-71.6406	-73.2376	-73.4573	-73.9308	-73.795	-73.3448
8.75	-72.4388	-71.663	-73.3388	-73.4209	-73.9561	-73.7413	-73.3474
8.8	-72.4127	-71.678	-73.4116	-73.3734	-73.9742	-73.6911	-73.3443
8.85	-72.378	-71.6821	-73.4573	-73.34	-73.9899	-73.6552	-73.3375
8.9	-72.344	-71.6747	-73.4777	-73.3416	-74.0027	-73.6405	-73.3304
8.95	-72.3271	-71.659	-73.4702	-73.3838	-74.0102	-73.6467	-73.3261
9	-72.3422	-71.6411	-73.4303	-73.4549	-74.0119	-73.6663	-73.3253
9.05	-72.3946	-71.6259	-73.3573	-73.5346	-74.0101	-73.6895	-73.3284
9.1	-72.4784	-71.6163	-73.2593	-73.6044	-74.0066	-73.7094	-73.3393
9.15	-72.5772	-71.6149	-73.1551	-73.6537	-74.0016	-73.7254	-73.3673
9.2	-72.6672	-71.6251	-73.07	-73.6799	-73.9932	-73.7413	-73.4226
9.25	-72.7226	-71.6467	-73.0287	-73.6848	-73.9796	-73.7622	-73.5096
9.3	-72.7243	-71.6712	-73.0442	-73.6699	-73.9616	-73.7924	-73.6229
9.35	-72.6688	-71.6836	-73.1115	-73.6352	-73.9453	-73.835	-73.7476
9.4	-72.5744	-71.6694	-73.2083	-73.5816	-73.9404	-73.8897	-73.8639
9.45	-72.4764	-71.6232	-73.3044	-73.5137	-73.9541	-73.9496	-73.9533
9.5	-72.4139	-71.5521	-73.3742	-73.4418	-73.9847	-74.0009	-74.0034
9.55	-72.4118	-71.4723	-73.4074	-73.3793	-74.0202	-74.029	-74.0114
9.6	-72.4687	-71.4021	-73.4114	-73.339	-74.0445	-74.0278	-73.9824
9.65	-72.5592	-71.3552	-73.4041	-73.3275	-74.0465	-74.0024	-73.9273
9.7	-72.6477	-71.3374	-73.4017	-73.3413	-74.0243	-73.9642	-73.8607
9.75	-72.7067	-71.3456	-73.4097	-73.3665	-73.9816	-73.9228	-73.7985
9.8	-72.726	-71.3699	-73.4226	-73.386	-73.9189	-73.8822	-73.7533
9.85	-72.7118	-71.3972	-73.4308	-73.3881	-73.8317	-73.8431	-73.7316
9.9	-72.6789	-71.4176	-73.4288	-73.3734	-73.7168	-73.8058	-73.7333
9.95	-72.6415	-71.4278	-73.4175	-73.3531	-73.5816	-73.7716	-73.7558
10	-72.609	-71.4297	-73.4011	-73.342	-73.4455	-73.7402	-73.7956
10.05	-72.5857	-71.4241	-73.3844	-73.35	-73.3309	-73.7087	-73.847
10.1	-72.5737	-71.4077	-73.3728	-73.3778	-73.252	-73.6731	-73.9007
10.15	-72.5747	-71.3746	-73.3745	-73.4181	-73.2098	-73.631	-73.9432
10.2	-72.5908	-71.3239	-73.3978	-73.4613	-73.1944	-73.5845	-73.9597
10.25	-72.623	-71.2653	-73.4429	-73.5015	-73.1931	-73.5393	-73.9391
10.3	-72.6692	-71.2197	-73.495	-73.5372	-73.1985	-73.5022	-73.8798
10.35	-72.7217	-71.2116	-73.5268	-73.5676	-73.2148	-73.4795	-73.7924
10.4	-72.7697	-71.257	-73.5127	-73.5879	-73.2543	-73.4769	-73.6983
10.45	-72.8047	-71.3532	-73.4459	-73.5903	-73.3276	-73.4986	-73.6204
10.5	-72.8276	-71.4783	-73.3451	-73.5679	-73.4317	-73.5455	-73.5729
10.55	-72.8471	-71.5993	-73.2442	-73.5192	-73.548	-73.613	-73.5562
10.6	-72.8727	-71.685	-73.1738	-73.45	-73.6512	-73.6929	-73.558
10.65	-72.9056	-71.7175	-73.1456	-73.3703	-73.7248	-73.7768	-73.5621
10.7	-72.9374	-71.6969	-73.1507	-73.2906	-73.7696	-73.8573	-73.5578
10.75	-72.9557	-71.64	-73.1713	-73.22	-73.799	-73.926	-73.5461
10.8	-72.9509	-71.5723	-73.1939	-73.165	-73.826	-73.973	-73.5377
10.85	-72.9197	-71.5165	-73.2168	-73.1275	-73.8526	-73.9903	-73.5452
10.9	-72.8658	-71.4837	-73.2466	-73.1032	-73.873	-73.9763	-73.5738
10.95	-72.7964	-71.4702	-73.2895	-73.0813	-73.8834	-73.9387	-73.6159
11	-72.7188	-71.4624	-73.3438	-73.0505	-73.8887	-73.8924	-73.6539
11.05	-72.6373	-71.4492	-73.3985	-73.0068	-73.899	-73.8536	-73.6686
11.1	-72.5525	-71.433	-73.4401	-72.957	-73.9195	-73.8315	-73.6508
11.15	-72.4641	-71.4298	-73.4597	-72.9133	-73.9452	-73.8235	-73.6068
11.2	-72.3734	-71.4582	-73.4561	-72.8864	-73.9647	-73.8176	-73.5549
11.25	-72.2853	-71.5231	-73.4347	-72.88	-73.9682	-73.8017	-73.5138
11.3	-72.2055	-71.61	-73.4062	-72.8923	-73.9538	-73.7724	-73.4915
11.35	-72.1375	-71.6951	-73.3845	-72.9209	-73.9282	-73.7376	-73.4813
11.4	-72.0826	-71.762	-73.3838	-72.9663	-73.9042	-73.7129	-73.4674
11.45	-72.0433	-71.8112	-73.4118	-73.0302	-73.8941	-73.7139	-73.4337
11.5	-72.0263	-71.8549	-73.465	-73.1102	-73.9028	-73.747	-73.3725
11.55	-72.0392	-71.9032	-73.5301	-73.1968	-73.9235	-73.8055	-73.2875
11.6	-72.0836	-71.9544	-73.5903	-73.2765	-73.9397	-73.8703	-73.1914
11.65	-72.1506	-71.9962	-73.6316	-73.337	-73.9349	-73.9179	-73.0992
11.7	-72.2227	-72.0138	-73.6455	-73.3699	-73.9033	-73.9299	-73.0226
11.75	-72.2802	-71.9979	-73.6296	-73.3701	-73.8553	-73.8988	-72.9682
11.8	-72.3081	-71.9472	-73.5873	-73.3361	-73.8144	-73.8292	-72.9393
11.85	-72.3013	-71.8692	-73.5275	-73.2729	-73.8048	-73.7343	-72.9378
11.9	-72.2672	-71.7782	-73.4623	-73.1935	-73.8386	-73.6292	-72.9644
11.95	-72.223	-71.6923	-73.4028	-73.1168	-73.9087	-73.525	-73.0168
12	-72.1916	-71.6284	-73.354	-73.0619	-73.9928	-73.4282	-73.0875
12.05	-72.1938	-71.598	-73.3142	-73.0422	-74.0662	-73.3451	-73.1656
12.1	-72.2414	-71.6055	-73.2774	-73.0619	-74.1146	-73.2859	-73.2409
12.15	-72.3308	-71.6466	-73.2377	-73.1152	-74.1365	-73.2614	-73.3079
12.2	-72.441	-71.7088	-73.1908	-73.1897	-74.137	-73.2766	-73.3661
12.25	-72.5396	-71.7729	-73.1354	-73.27	-74.1195	-73.3241	-73.4166
12.3	-72.5938	-71.8189	-73.0748	-73.3407	-74.0819	-73.3843	-73.46
12.35	-72.5841	-71.8328	-73.018	-73.3883	-74.0201	-73.4336	-73.4986
12.4	-72.5127	-71.8108	-72.9758	-73.4038	-73.9352	-73.4557	-73.5389
12.45	-72.4031	-71.7612	-72.9558	-73.385	-73.8381	-73.4487	-73.5898
12.5	-72.2912	-71.7005	-72.9591	-73.3384	-73.7477	-73.4238	-73.6555
12.55	-72.2094	-71.6462	-72.9824	-73.2785	-73.6836	-73.3958	-73.729
12.6	-72.1728	-71.6097	-73.0191	-73.2232	-73.6578	-73.3755	-73.7923
12.65	-72.1763	-71.5937	-73.0603	-73.1875	-73.6709	-73.3675	-73.8258
12.7	-72.204	-71.5933	-73.0972	-73.1793	-73.7142	-73.3736	-73.818
12.75	-72.2416	-71.6001	-73.1231	-73.1991	-73.7731	-73.3932	-73.7719
12.8	-72.2827	-71.607	-73.136	-73.2392	-73.8311	-73.4213	-73.705
12.85	-72.3256	-71.6127	-73.1378	-73.2861	-73.8739	-73.449	-73.6434
12.9	-72.3676	-71.6218	-73.1331	-73.3242	-73.8931	-73.4665	-73.6109
12.95	-72.4019	-71.6418	-73.1273	-73.3424	-73.8894	-73.4684	-73.6194
13	-72.4214	-71.6753	-73.1236	-73.3401	-73.8717	-73.4548	-73.6634
13.05	-72.4242	-71.7171	-73.1219	-73.3265	-73.8541	-73.4297	-73.7247
13.1	-72.4173	-71.7567	-73.1197	-73.3139	-73.8495	-73.3994	-73.7823
13.15	-72.4123	-71.7837	-73.1154	-73.3103	-73.864	-73.3736	-73.821
13.2	-72.4185	-71.7922	-73.1112	-73.3153	-73.8948	-73.3656	-73.8364
13.25	-72.436	-71.7821	-73.1114	-73.3233	-73.9323	-73.3876	-73.8336
13.3	-72.4583	-71.7583	-73.1196	-73.3296	-73.9658	-73.4427	-73.8241
13.35	-72.4798	-71.7295	-73.1365	-73.3365	-73.987	-73.5201	-73.8192
13.4	-72.5006	-71.7056	-73.1612	-73.3529	-73.9915	-73.5996	-73.8241
13.45	-72.5233	-71.6949	-73.1924	-73.3872	-73.9793	-73.6622	-73.8349
13.5	-72.544	-71.7002	-73.2276	-73.4391	-73.9546	-73.6993	-73.8415
13.55	-72.5505	-71.7144	-73.2617	-73.4973	-73.9243	-73.7134	-73.8329
13.6	-72.5325	-71.7217	-73.2881	-73.5445	-73.8948	-73.7132	-73.801
13.65	-72.4939	-71.7043	-73.3026	-73.5651	-73.8678	-73.7075	-73.7436
13.7	-72.4555	-71.6522	-73.3071	-73.549	-73.8399	-73.7033	-73.6661
13.75	-72.4417	-71.5679	-73.3099	-73.4925	-73.8048	-73.7045	-73.584
13.8	-72.4646	-71.4639	-73.324	-73.4	-73.7577	-73.7123	-73.5193
13.85	-72.5177	-71.3583	-73.3612	-73.2857	-73.6981	-73.7253	-73.4922
13.9	-72.5825	-71.2713	-73.4272	-73.1734	-73.6289	-73.7395	-73.5099
13.95	-72.64	-71.2219	-73.5149	-73.0891	-73.5541	-73.7493	-73.5601
14	-72.6778	-71.2224	-73.6031	-73.049	-73.4769	-73.7479	-73.6145
14.05	-72.6915	-71.2727	-73.6633	-73.049	-73.3998	-73.7297	-73.6413
14.1	-72.6815	-71.3591	-73.6724	-73.0679	-73.3286	-73.6922	-73.6204
14.15	-72.6514	-71.46	-73.6249	-73.0814	-73.2726	-73.6386	-73.5529
14.2	-72.6065	-71.5544	-73.5357	-73.0778	-73.2426	-73.5773	-73.4591
14.25	-72.5534	-71.6269	-73.4326	-73.0611	-73.2455	-73.5183	-73.3674
14.3	-72.4988	-71.6688	-73.3441	-73.0425	-73.2812	-73.4679	-73.3001
14.35	-72.4511	-71.676	-73.2896	-73.0304	-73.3434	-73.4267	-73.2634
14.4	-72.4193	-71.6495	-73.2758	-73.0281	-73.4221	-73.3923	-73.2468
14.45	-72.4098	-71.5986	-73.2992	-73.0366	-73.5068	-73.3643	-73.2334
14.5	-72.4222	-71.5443	-73.3482	-73.0569	-73.5875	-73.3478	-73.2116
14.55	-72.4497	-71.5171	-73.4064	-73.0874	-73.6556	-73.3509	-73.1827
14.6	-72.4846	-71.5446	-73.4563	-73.121	-73.706	-73.3768	-73.159
14.65	-72.5231	-71.6362	-73.4853	-73.145	-73.7383	-73.418	-73.1579
14.7	-72.5635	-71.7724	-73.4898	-73.146	-73.7571	-73.4562	-73.1941
14.75	-72.5998	-71.911	-73.4738	-73.1164	-73.7685	-73.4724	-73.2721
14.8	-72.6207	-72.0068	-73.4443	-73.0588	-73.7775	-73.459	-73.382
14.85	-72.6148	-72.0337	-73.4076	-72.9845	-73.7856	-73.4249	-73.5007
14.9	-72.5766	-71.9956	-73.3692	-72.9087	-73.7912	-73.3889	-73.5994
14.95	-72.5094	-71.921	-73.3349	-72.8452	-73.7912	-73.367	-73.6532
15	-72.4247	-71.8453	-73.313	-72.8052	-73.7825	-73.3635	-73.649
15.05	-72.3367	-71.7946	-73.3135	-72.7962	-73.7643	-73.3718	-73.589
15.1	-72.255	-71.7771	-73.3437	-72.8194	-73.7388	-73.3822	-73.4898
15.15	-72.1795	-71.786	-73.4022	-72.867	-73.7126	-73.3881	-73.3773
15.2	-72.1021	-71.8088	-73.4754	-72.9229	-73.6957	-73.3861	-73.2782
15.25	-72.018	-71.8361	-73.5395	-72.9684	-73.698	-73.3712	-73.2127
15.3	-71.9338	-71.8661	-73.5691	-72.9902	-73.7243	-73.3366	-73.191
15.35	-71.8677	-71.9024	-73.5465	-72.9841	-73.7703	-73.2787	-73.2154
15.4	-71.8384	-71.9471	-73.4691	-72.9561	-73.8239	-73.201	-73.2834
15.45	-71.8535	-71.9943	-73.3507	-72.9193	-73.8694	-73.1142	-73.3889
15.5	-71.9038	-72.0303	-73.216	-72.8889	-73.8943	-73.0312	-73.5191
15.55	-71.9674	-72.0424	-73.09	-72.8758	-73.8934	-72.964	-73.653
15.6	-72.0193	-72.0298	-72.9884	-72.8832	-73.871	-72.9241	-73.7645
15.65	-72.041	-72.0063	-72.913	-72.9076	-73.8395	-72.9203	-73.83
15.7	-72.0263	-71.992	-72.8553	-72.944	-73.8139	-72.9526	-73.8362
15.75	-71.9832	-71.9996	-72.8044	-72.9881	-73.8057	-73.007	-73.783
15.8	-71.9316	-72.0249	-72.7539	-73.0356	-73.8171	-73.0594	-73.6844
15.85	-71.8966	-72.0509	-72.7051	-73.0793	-73.8387	-73.0853	-73.5658
15.9	-71.8973	-72.0603	-72.6658	-73.1094	-73.8528	-73.0731	-73.4576
15.95	-71.9368	-72.0492	-72.6444	-73.1189	-73.8419	-73.03	-73.3851
16	-72.0019	-72.0292	-72.6445	-73.1093	-73.7996	-72.9788	-73.3594
16.05	-72.0716	-72.0187	-72.6623	-73.0919	-73.7355	-72.9451	-73.3738
16.1	-72.1297	-72.0287	-72.6886	-73.0813	-73.671	-72.9441	-73.4093
16.15	-72.1704	-72.0557	-72.7137	-73.0889	-73.629	-72.9753	-73.447
16.2	-72.1974	-72.0863	-72.7319	-73.1179	-73.6223	-73.0279	-73.4785
16.25	-72.2188	-72.1077	-72.744	-73.1661	-73.6487	-73.0903	-73.5088
16.3	-72.2435	-72.1139	-72.7573	-73.2294	-73.6946	-73.1548	-73.549
16.35	-72.2782	-72.1054	-72.7818	-73.3022	-73.7433	-73.2158	-73.6059
16.4	-72.3256	-72.086	-72.8248	-73.3767	-73.7843	-73.2657	-73.6752
16.45	-72.38	-72.0608	-72.8848	-73.4438	-73.8144	-73.2948	-73.7426
16.5	-72.4268	-72.0343	-72.9507	-73.4958	-73.8332	-73.2972	-73.7917
16.55	-72.4483	-72.0088	-73.0049	-73.5281	-73.8375	-73.2766	-73.8118
16.6	-72.4345	-71.9828	-73.0312	-73.5392	-73.8228	-73.2462	-73.8037
16.65	-72.3898	-71.9537	-73.0233	-73.5306	-73.7894	-73.2209	-73.7792
16.7	-72.3312	-71.9217	-72.9889	-73.5075	-73.7457	-73.2078	-73.7553
16.75	-72.2796	-71.8917	-72.947	-73.4799	-73.7048	-73.2029	-73.7478
16.8	-72.2491	-71.8694	-72.9176	-73.4593	-73.6772	-73.196	-73.7644
16.85	-72.2409	-71.8588	-72.9117	-73.4527	-73.6645	-73.179	-73.8019
16.9	-72.2446	-71.8599	-72.9264	-73.4582	-73.6591	-73.1526	-73.846
16.95	-72.2466	-71.8719	-72.9477	-73.466	-73.6502	-73.1265	-73.8769
17	-72.2408	-71.8937	-72.9592	-73.4641	-73.6303	-73.114	-73.8807
17.05	-72.2316	-71.923	-72.9505	-73.4456	-73.5975	-73.1249	-73.8587
17.1	-72.2291	-71.9544	-72.9216	-73.413	-73.5536	-73.16	-73.828
17.15	-72.241	-71.9786	-72.8814	-73.3772	-73.5009	-73.2112	-73.81
17.2	-72.2688	-71.9857	-72.8427	-73.3512	-73.4414	-73.2654	-73.8166
17.25	-72.3099	-71.9705	-72.8166	-73.342	-73.3783	-73.3105	-73.842
17.3	-72.3609	-71.9368	-72.8072	-73.3468	-73.315	-73.3387	-73.8664
17.35	-72.4195	-71.8969	-72.8125	-73.3548	-73.2531	-73.3459	-73.8669
17.4	-72.4837	-71.8653	-72.8271	-73.3538	-73.1935	-73.3315	-73.8298
17.45	-72.5493	-71.851	-72.8469	-73.3366	-73.1404	-73.2987	-73.756
17.5	-72.6102	-71.8536	-72.8683	-73.3039	-73.1038	-73.2559	-73.6571
17.55	-72.6613	-71.867	-72.8853	-73.2627	-73.0958	-73.2158	-73.5474
17.6	-72.7018	-71.8856	-72.8899	-73.2226	-73.1229	-73.1905	-73.4379
17.65	-72.7339	-71.9074	-72.8771	-73.1909	-73.1814	-73.1869	-73.3359
17.7	-72.7599	-71.9309	-72.8521	-73.1709	-73.2581	-73.204	-73.2488
17.75	-72.7801	-71.9518	-72.8311	-73.1617	-73.3363	-73.2343	-73.1851
17.8	-72.7945	-71.9637	-72.8333	-73.16	-73.4016	-73.2678	-73.1531
17.85	-72.8037	-71.9625	-72.8698	-73.1621	-73.4462	-73.2961	-73.1582
17.9	-72.8086	-71.9497	-72.9352	-73.1656	-73.4703	-73.3164	-73.2003
17.95	-72.8093	-71.9321	-73.0095	-73.1705	-73.4788	-73.3305	-73.2715
18	-72.8055	-71.9188	-73.0671	-73.1769	-73.4761	-73.341	-73.3575
18.05	-72.7968	-71.9195	-73.0884	-73.1832	-73.4634	-73.3486	-73.4414
18.1	-72.785	-71.9431	-73.0674	-73.1897	-73.4419	-73.3539	-73.5089
18.15	-72.7741	-71.9945	-73.0143	-73.2011	-73.4185	-73.3599	-73.5532
18.2	-72.768	-72.0693	-72.9524	-73.226	-73.4071	-73.3726	-73.5747
18.25	-72.7665	-72.1502	-72.9088	-73.2689	-73.4225	-73.3982	-73.5776
18.3	-72.7627	-72.2111	-72.9032	-73.3246	-73.4718	-73.4411	-73.5652
18.35	-72.746	-72.231	-72.9421	-73.3794	-73.5506	-73.5024	-73.5389
18.4	-72.7091	-72.2073	-73.0193	-73.4188	-73.6469	-73.5792	-73.5015
18.45	-72.6533	-72.1591	-73.1205	-73.436	-73.7474	-73.6626	-73.4594
18.5	-72.5889	-72.1155	-73.2279	-73.4342	-73.8404	-73.7409	-73.423
18.55	-72.532	-72.0994	-73.3251	-73.423	-73.9147	-73.8019	-73.4016
18.6	-72.4977	-72.1176	-73.4018	-73.4121	-73.9597	-73.836	-73.3987
18.65	-72.4926	-72.161	-73.455	-73.4065	-73.9687	-73.8363	-73.411
18.7	-72.5106	-72.2116	-73.4859	-73.4082	-73.9425	-73.8008	-73.4285
18.75	-72.5358	-72.2496	-73.494	-73.4187	-73.8924	-73.7351	-73.4379
18.8	-72.5514	-72.2607	-73.4756	-73.4386	-73.8362	-73.6523	-73.4265
18.85	-72.5478	-72.2418	-73.4279	-73.4658	-73.7926	-73.5671	-73.388
18.9	-72.5226	-72.2031	-73.3548	-73.4944	-73.7733	-73.4904	-73.3265
18.95	-72.4773	-72.164	-73.2686	-73.5168	-73.7786	-73.4266	-73.2579
19	-72.4148	-72.1418	-73.1881	-73.5271	-73.7976	-73.3767	-73.2057
19.05	-72.341	-72.1404	-73.13	-73.5215	-73.814	-73.3436	-73.1913
19.1	-72.2636	-72.1473	-73.1002	-73.4973	-73.8143	-73.3343	-73.223
19.15	-72.189	-72.1442	-73.0901	-73.452	-73.7931	-73.3567	-73.2902
19.2	-72.1176	-72.1232	-73.0833	-73.3859	-73.7538	-73.4132	-73.367
19.25	-72.0425	-72.0962	-73.0685	-73.306	-73.7056	-73.4946	-73.4255
19.3	-71.957	-72.0889	-73.0472	-73.2272	-73.6608	-73.5796	-73.4499
19.35	-71.8621	-72.1226	-73.0285	-73.1679	-73.6337	-73.6421	-73.4432
19.4	-71.7685	-72.1959	-73.0181	-73.1403	-73.6369	-73.6602	-73.4214
19.45	-71.6902	-72.2827	-73.0124	-73.1428	-73.6744	-73.6252	-73.4007
19.5	-71.6361	-72.3458	-73.0032	-73.1599	-73.7358	-73.5454	-73.3864
19.55	-71.6092	-72.3598	-72.9861	-73.1719	-73.798	-73.4438	-73.3732
19.6	-71.6121	-72.3251	-72.9649	-73.164	-73.8367	-73.3482	-73.3565
19.65	-71.65	-72.2645	-72.946	-73.1325	-73.8397	-73.28	-73.3426
19.7	-71.7265	-72.2075	-72.931	-73.0844	-73.8114	-73.2468	-73.3472
19.75	-71.8359	-72.1737	-72.9148	-73.0337	-73.7687	-73.2427	-73.3829
19.8	-71.9602	-72.1655	-72.8921	-72.996	-73.7318	-73.2541	-73.4471
19.85	-72.0741	-72.1719	-72.8632	-72.9817	-73.7181	-73.266	-73.5214
19.9	-72.1531	-72.1782	-72.8338	-72.9898	-73.7369	-73.2675	-73.5823
19.95	-72.1812	-72.1765	-72.8114	-73.0094	-73.7864	-73.256	-73.6145
20	-72.1552	-72.1692	-72.8018	-73.0268	-73.851	-73.238	-73.6187
20.05	-72.0863	-72.1654	-72.8089	-73.0368	-73.9043	-73.2265	-73.6084
20.1	-71.9975	-72.1734	-72.8326	-73.0466	-73.9191	-73.2335	-73.6024
20.15	-71.9167	-72.1946	-72.8665	-73.072	-73.8814	-73.2605	-73.6137
20.2	-71.8689	-72.2239	-72.9004	-73.1272	-73.7996	-73.2944	-73.6438
20.25	-71.8688	-72.2546	-72.9272	-73.2152	-73.702	-73.3139	-73.6815
20.3	-71.9189	-72.2822	-72.9474	-73.3246	-73.6252	-73.3061	-73.71
20.35	-72.0081	-72.3047	-72.9669	-73.431	-73.597	-73.2782	-73.7169
20.4	-72.1123	-72.3206	-72.9904	-73.5044	-73.6244	-73.2544	-73.6996
20.45	-72.1996	-72.328	-73.0179	-73.5206	-73.6914	-73.2563	-73.6629
20.5	-72.2412	-72.3264	-73.045	-73.4731	-73.7693	-73.2847	-73.6141
20.55	-72.2241	-72.318	-73.0657	-73.3784	-73.8332	-73.3179	-73.5627
20.6	-72.156	-72.3064	-73.0748	-73.2706	-73.8735	-73.3297	-73.5199
20.65	-72.0623	-72.2928	-73.0703	-73.1867	-73.8952	-73.3103	-73.4973
20.7	-71.9755	-72.2743	-73.0547	-73.1528	-73.9092	-73.2748	-73.5001
20.75	-71.9215	-72.2474	-73.0347	-73.1756	-73.9236	-73.2526	-73.5237
20.8	-71.9081	-72.2131	-73.0183	-73.2432	-73.9412	-73.2671	-73.5553
20.85	-71.923	-72.178	-73.0109	-73.332	-73.9601	-73.322	-73.5785
20.9	-71.9419	-72.1502	-73.0138	-73.416	-73.9748	-73.4012	-73.5794
20.95	-71.9423	-72.1348	-73.0256	-73.4735	-73.9777	-73.4808	-73.5526
21	-71.914	-72.1295	-73.0444	-73.4934	-73.9618	-73.5432	-73.5049
21.05	-71.8611	-72.1265	-73.0693	-73.4773	-73.9227	-73.5813	-73.4533
21.1	-71.7979	-72.1163	-73.0994	-73.4387	-73.8621	-73.5945	-73.417
21.15	-71.7418	-72.0941	-73.1315	-73.397	-73.7879	-73.5812	-73.4081
21.2	-71.7064	-72.0632	-73.159	-73.3696	-73.7127	-73.5387	-73.4262
21.25	-71.697	-72.0327	-73.1734	-73.3655	-73.6474	-73.4695	-73.46
21.3	-71.7122	-72.0114	-73.1694	-73.3835	-73.595	-73.3848	-73.4939
21.35	-71.7477	-72.0015	-73.1483	-73.4146	-73.55	-73.3007	-73.5165
21.4	-71.7984	-71.9982	-73.1188	-73.4474	-73.5042	-73.2305	-73.5272
21.45	-71.8568	-71.9946	-73.0921	-73.4756	-73.4531	-73.1816	-73.5355
21.5	-71.9102	-71.986	-73.076	-73.5015	-73.3977	-73.1573	-73.553
21.55	-71.9417	-71.9725	-73.072	-73.5318	-73.342	-73.1577	-73.5847
21.6	-71.9379	-71.9561	-73.0756	-73.5694	-73.2912	-73.1792	-73.6248
21.65	-71.8975	-71.9377	-73.08	-73.6078	-73.2493	-73.2134	-73.66
21.7	-71.8345	-71.9174	-73.0799	-73.6335	-73.2189	-73.2509	-73.6771
21.75	-71.7709	-71.8984	-73.076	-73.6342	-73.2011	-73.2861	-73.6699
21.8	-71.7246	-71.8894	-73.0751	-73.6053	-73.1967	-73.3202	-73.641
21.85	-71.7024	-71.9015	-73.0853	-73.5527	-73.2068	-73.3588	-73.5964
21.9	-71.703	-71.9437	-73.1082	-73.4881	-73.2332	-73.4071	-73.5434
21.95	-71.7232	-72.0177	-73.1355	-73.4231	-73.2777	-73.4661	-73.4913
22	-71.7585	-72.1165	-73.1516	-73.364	-73.3404	-73.5306	-73.452
22.05	-71.7983	-72.2264	-73.1401	-73.3131	-73.4176	-73.5933	-73.4344
22.1	-71.8244	-72.3314	-73.0903	-73.2732	-73.5013	-73.6496	-73.4376
22.15	-71.82	-72.417	-73.0026	-73.2486	-73.5838	-73.699	-73.4507
22.2	-71.7819	-72.4727	-72.891	-73.2431	-73.6618	-73.7402	-73.4611
22.25	-71.7247	-72.4944	-72.7797	-73.256	-73.7389	-73.7665	-73.4642
22.3	-71.6717	-72.4868	-72.6947	-73.282	-73.8225	-73.7677	-73.4647
22.35	-71.6422	-72.4634	-72.6532	-73.3124	-73.9177	-73.7386	-73.4707
22.4	-71.6407	-72.4405	-72.6579	-73.3373	-74.0215	-73.6868	-73.4857
22.45	-71.6571	-72.427	-72.7002	-73.3487	-74.1205	-73.6311	-73.5038
22.5	-71.6729	-72.4197	-72.7676	-73.3426	-74.1938	-73.5926	-73.5119
22.55	-71.6701	-72.406	-72.8496	-73.3224	-74.2223	-73.5831	-73.4958
22.6	-71.6395	-72.3739	-72.94	-73.2986	-74.199	-73.5975	-73.4492
22.65	-71.5842	-72.3221	-73.0333	-73.2843	-74.135	-73.6164	-73.3804
22.7	-71.5175	-72.2629	-73.1184	-73.2886	-74.055	-73.6148	-73.3119
22.75	-71.4558	-72.2166	-73.1777	-73.3099	-73.9836	-73.5738	-73.2713
22.8	-71.4107	-72.1995	-73.1923	-73.3378	-73.9323	-73.4891	-73.2766
22.85	-71.386	-72.2137	-73.1541	-73.3616	-73.8964	-73.3765	-73.3259
22.9	-71.3814	-72.2464	-73.0736	-73.3792	-73.8625	-73.2674	-73.399
22.95	-71.395	-72.2776	-72.9787	-73.3971	-73.8202	-73.1966	-73.4678
23	-71.4224	-72.2906	-72.9001	-73.4219	-73.7683	-73.1831	-73.5098
23.05	-71.4556	-72.2774	-72.8547	-73.4527	-73.7148	-73.2193	-73.5163
23.1	-71.4854	-72.2415	-72.8377	-73.4819	-73.6727	-73.2752	-73.4919
23.15	-71.5073	-72.1947	-72.831	-73.5014	-73.6561	-73.3157	-73.4515
23.2	-71.5226	-72.1531	-72.8195	-73.507	-73.6761	-73.3193	-73.4146
23.25	-71.5363	-72.1308	-72.8021	-73.4999	-73.7366	-73.2854	-73.3999
23.3	-71.5538	-72.1349	-72.7895	-73.4853	-73.8317	-73.2275	-73.4193
23.35	-71.5792	-72.1614	-72.7926	-73.4708	-73.9469	-73.1617	-73.4723
23.4	-71.6146	-72.1955	-72.8103	-73.4642	-74.0618	-73.0982	-73.5455
23.45	-71.6581	-72.2171	-72.8269	-73.4689	-74.1544	-73.0431	-73.6177
23.5	-71.7042	-72.2107	-72.8203	-73.4831	-74.2072	-73.0036	-73.6671
23.55	-71.7445	-72.1733	-72.7763	-73.5023	-74.2122	-72.9885	-73.6779
23.6	-71.7715	-72.1142	-72.6995	-73.5242	-74.1753	-73.002	-73.6443
23.65	-71.7807	-72.0467	-72.6106	-73.5505	-74.1142	-73.0386	-73.5709
23.7	-71.7719	-71.9798	-72.5337	-73.5842	-74.0521	-73.0844	-73.4717
23.75	-71.7487	-71.915	-72.4842	-73.6257	-74.0076	-73.1257	-73.3681
23.8	-71.7196	-71.8508	-72.4646	-73.6708	-73.9886	-73.1551	-73.2845
23.85	-71.6972	-71.7894	-72.4689	-73.7114	-73.9904	-73.1726	-73.2428
23.9	-71.6957	-71.7406	-72.4901	-73.7374	-74.0009	-73.1815	-73.2564
23.95	-71.7252	-71.7178	-72.5244	-73.7399	-74.0072	-73.1854	-73.3252
24	-71.7868	-71.7285	-72.5714	-73.7155	-73.9996	-73.188	-73.4344
24.05	-71.87	-71.7661	-72.6292	-73.6691	-73.9739	-73.1939	-73.5595
24.1	-71.9562	-71.8124	-72.689	-73.6132	-73.9334	-73.207	-73.6762
24.15	-72.0265	-71.8487	-72.7347	-73.5643	-73.8891	-73.2277	-73.7687
24.2	-72.0713	-71.8661	-72.7484	-73.5373	-73.8555	-73.25	-73.833
24.25	-72.0933	-71.8671	-72.7186	-73.5389	-73.8422	-73.2647	-73.872
24.3	-72.1022	-71.8583	-72.6474	-73.5639	-73.8475	-73.2656	-73.8902
24.35	-72.1037	-71.8445	-72.5512	-73.5987	-73.8615	-73.2536	-73.8893
24.4	-72.0937	-71.8262	-72.4548	-73.63	-73.8747	-73.2357	-73.8698
24.45	-72.0632	-71.8019	-72.3814	-73.6542	-73.8846	-73.22	-73.8338
24.5	-72.0087	-71.771	-72.3438	-73.6777	-73.8964	-73.2119	-73.788
24.55	-71.9388	-71.7346	-72.3429	-73.7084	-73.916	-73.2127	-73.7425
24.6	-71.8695	-71.6942	-72.3736	-73.7462	-73.9417	-73.2245	-73.7061
24.65	-71.8157	-71.651	-72.4311	-73.7818	-73.9617	-73.2533	-73.6819
24.7	-71.7863	-71.6086	-72.5139	-73.8034	-73.961	-73.3069	-73.6662
24.75	-71.7848	-71.5754	-72.6207	-73.8043	-73.9333	-73.388	-73.6508
24.8	-71.8102	-71.5632	-72.7456	-73.785	-73.8886	-73.4878	-73.6259
24.85	-71.8554	-71.58	-72.8767	-73.7502	-73.8494	-73.5892	-73.5823
24.9	-71.906	-71.6232	-72.9995	-73.7069	-73.8362	-73.6773	-73.5147
24.95	-71.9455	-71.6798	-73.1038	-73.6647	-73.8545	-73.7482	-73.4254
25	-71.964	-71.732	-73.1864	-73.6342	-73.8916	-73.807	-73.3243
25.05	-71.9653	-71.7639	-73.2487	-73.621	-73.9262	-73.8589	-73.2254
25.1	-71.9629	-71.7665	-73.2903	-73.6194	-73.9423	-73.9016	-73.1404
25.15	-71.9692	-71.7403	-73.3058	-73.6142	-73.9368	-73.9274	-73.0767
25.2	-71.9858	-71.6971	-73.2873	-73.5909	-73.9153	-73.9317	-73.0363
25.25	-72.004	-71.6572	-73.2308	-73.5467	-73.8835	-73.9186	-73.0174
25.3	-72.0111	-71.6413	-73.1429	-73.4911	-73.8439	-73.8978	-73.0157
25.35	-71.9958	-71.6609	-73.0417	-73.4388	-73.8	-73.8782	-73.0261
25.4	-71.9509	-71.7129	-72.9519	-73.3999	-73.7612	-73.8639	-73.0439
25.45	-71.8757	-71.7826	-72.8958	-73.3766	-73.74	-73.8547	-73.0639
25.5	-71.778	-71.8504	-72.8856	-73.3652	-73.7444	-73.8472	-73.0802
25.55	-71.6738	-71.8992	-72.9206	-73.3595	-73.7727	-73.8362	-73.0868
25.6	-71.5812	-71.9175	-72.9896	-73.356	-73.8137	-73.8176	-73.0808
25.65	-71.5119	-71.9028	-73.0773	-73.3558	-73.8532	-73.7919	-73.0658
25.7	-71.4667	-71.8605	-73.1708	-73.3646	-73.8807	-73.7649	-73.0513
25.75	-71.4371	-71.803	-73.2616	-73.3883	-73.8923	-73.743	-73.0498
25.8	-71.4121	-71.7463	-73.3427	-73.4279	-73.8904	-73.7288	-73.0714
25.85	-71.3843	-71.7064	-73.4057	-73.4782	-73.8817	-73.7194	-73.1194
25.9	-71.3537	-71.6946	-73.4405	-73.5279	-73.8731	-73.7112	-73.1885
25.95	-71.3252	-71.7135	-73.4387	-73.5643	-73.869	-73.7044	-73.268
26	-71.3037	-71.7571	-73.3985	-73.5762	-73.8693	-73.705	-73.3452
26.05	-71.2908	-71.8156	-73.3275	-73.5577	-73.8709	-73.7211	-73.4096
26.1	-71.2856	-71.8815	-73.2427	-73.509	-73.8717	-73.7555	-73.457
26.15	-71.286	-71.9494	-73.1668	-73.4365	-73.8723	-73.8018	-73.4895
26.2	-71.2889	-72.013	-73.1211	-73.3512	-73.8756	-73.8477	-73.5107
26.25	-71.2901	-72.0644	-73.1177	-73.2649	-73.8838	-73.8817	-73.5209
26.3	-71.285	-72.0965	-73.1539	-73.1861	-73.8955	-73.8986	-73.5151
26.35	-71.2729	-72.1084	-73.2126	-73.1183	-73.9052	-73.8988	-73.4891
26.4	-71.2611	-72.1063	-73.2682	-73.061	-73.9059	-73.8847	-73.445
26.45	-71.2627	-72.1001	-73.2964	-73.0144	-73.8937	-73.8592	-73.3912
26.5	-71.288	-72.0966	-73.2841	-72.9828	-73.8717	-73.8254	-73.3377
26.55	-71.3345	-72.0937	-73.2352	-72.9747	-73.8482	-73.7857	-73.2911
26.6	-71.3854	-72.0824	-73.1689	-72.9999	-73.8313	-73.7423	-73.2553
26.65	-71.4198	-72.0538	-73.1105	-73.0639	-73.8228	-73.6967	-73.2338
26.7	-71.4237	-72.0061	-73.0796	-73.1623	-73.8172	-73.65	-73.232
26.75	-71.3956	-71.9464	-73.0801	-73.2806	-73.8063	-73.6018	-73.2542
26.8	-71.3426	-71.8875	-73.0984	-73.3994	-73.7863	-73.551	-73.3006
26.85	-71.2759	-71.8448	-73.1115	-73.5032	-73.7618	-73.4968	-73.364
26.9	-71.2093	-71.8315	-73.1002	-73.5849	-73.7437	-73.4387	-73.429
26.95	-71.1591	-71.855	-73.0601	-73.6445	-73.7429	-73.3738	-73.4742
27	-71.1414	-71.9121	-72.9999	-73.6836	-73.7648	-73.2971	-73.4799
27.05	-71.1671	-71.9887	-72.932	-73.7025	-73.8077	-73.2055	-73.4403
27.1	-71.2357	-72.0652	-72.8651	-73.7011	-73.8657	-73.1042	-73.3712
27.15	-71.3329	-72.124	-72.804	-73.6816	-73.9315	-73.008	-73.3067
27.2	-71.4342	-72.1556	-72.7549	-73.6496	-73.9972	-72.936	-73.2833
27.25	-71.5145	-72.1598	-72.7256	-73.6127	-74.0526	-72.9027	-73.3208
27.3	-71.5594	-72.1443	-72.7195	-73.5788	-74.0865	-72.911	-73.4125
27.35	-71.5708	-72.1209	-72.7295	-73.5542	-74.0923	-72.9526	-73.5283
27.4	-71.5649	-72.1013	-72.74	-73.5421	-74.074	-73.0122	-73.6283
27.45	-71.5628	-72.0941	-72.7365	-73.5429	-74.0453	-73.0741	-73.682
27.5	-71.582	-72.1013	-72.7163	-73.5557	-74.0199	-73.1254	-73.6825
27.55	-71.6313	-72.1166	-72.6895	-73.5803	-74.0023	-73.1564	-73.6505
27.6	-71.7106	-72.1268	-72.6709	-73.6166	-73.9864	-73.1613	-73.6204
27.65	-71.8117	-72.1179	-72.6687	-73.6617	-73.9643	-73.1394	-73.6179
27.7	-71.9191	-72.083	-72.6808	-73.7082	-73.9337	-73.0969	-73.6433
27.75	-72.0118	-72.0264	-72.6998	-73.7459	-73.8988	-73.0469	-73.672
27.8	-72.0693	-71.9608	-72.7209	-73.7645	-73.8662	-73.0067	-73.6741
27.85	-72.078	-71.901	-72.7456	-73.7555	-73.8418	-72.9934	-73.6367
27.9	-72.0347	-71.858	-72.7801	-73.7151	-73.829	-73.0173	-73.5733
27.95	-71.9481	-71.8352	-72.8293	-73.6482	-73.8276	-73.0757	-73.514
28	-71.838	-71.8316	-72.8913	-73.5706	-73.8301	-73.1516	-73.4855
28.05	-71.7316	-71.8466	-72.956	-73.5025	-73.8246	-73.2191	-73.4959
28.1	-71.6566	-71.8825	-73.0103	-73.4582	-73.8019	-73.2541	-73.5327
28.15	-71.6312	-71.9396	-73.0453	-73.44	-73.7633	-73.2462	-73.5719
28.2	-71.6577	-72.0092	-73.0598	-73.4395	-73.7211	-73.2066	-73.5919
28.25	-71.7229	-72.0707	-73.0581	-73.4474	-73.6902	-73.1646	-73.583
28.3	-71.8053	-72.0984	-73.0446	-73.4615	-73.6765	-73.1532	-73.5505
28.35	-71.8839	-72.072	-73.0207	-73.4871	-73.6721	-73.1916	-73.509
28.4	-71.9441	-71.9865	-72.9851	-73.5307	-73.6589	-73.2757	-73.4735
28.45	-71.9796	-71.8555	-72.9381	-73.5918	-73.6215	-73.3816	-73.4533
28.5	-71.9916	-71.7067	-72.8847	-73.661	-73.5583	-73.4792	-73.4496
28.55	-71.987	-71.5696	-72.8367	-73.7256	-73.4841	-73.548	-73.4572
28.6	-71.9762	-71.4641	-72.8086	-73.7757	-73.4221	-73.5836	-73.4683
28.65	-71.9703	-71.3957	-72.8102	-73.8033	-73.3904	-73.5949	-73.4751
28.7	-71.9759	-71.3601	-72.8411	-73.799	-73.3925	-73.5925	-73.4725
28.75	-71.9921	-71.3508	-72.8929	-73.7547	-73.4186	-73.5805	-73.4596
28.8	-72.0107	-71.3652	-72.9563	-73.6707	-73.454	-73.5561	-73.4401
28.85	-72.0192	-71.4045	-73.0248	-73.5629	-73.4904	-73.5173	-73.422
28.9	-72.0067	-71.4691	-73.0912	-73.4581	-73.5286	-73.4702	-73.4134
28.95	-71.9692	-71.5529	-73.1425	-73.3831	-73.5736	-73.4298	-73.416
29	-71.9126	-71.6408	-73.1623	-73.352	-73.6265	-73.4113	-73.4221
29.05	-71.8502	-71.7141	-73.1406	-73.3623	-73.6808	-73.4206	-73.4206
29.1	-71.7957	-71.758	-73.0806	-73.3985	-73.7254	-73.4503	-73.4065
29.15	-71.7548	-71.7674	-72.999	-73.4401	-73.7502	-73.4853	-73.3867
29.2	-71.7232	-71.7463	-72.9193	-73.4691	-73.7505	-73.5133	-73.3753
29.25	-71.6918	-71.7045	-72.8641	-73.4733	-73.7287	-73.5306	-73.3832
29.3	-71.6539	-71.6525	-72.8486	-73.4463	-73.6936	-73.5394	-73.4107
29.35	-71.6096	-71.5991	-72.8756	-73.387	-73.6576	-73.5407	-73.4461
29.4	-71.5657	-71.5503	-72.9339	-73.301	-73.6308	-73.5303	-73.4713
29.45	-71.5306	-71.5103	-73.0009	-73.201	-73.6183	-73.5035	-73.4701
29.5	-71.5072	-71.485	-73.0518	-73.1053	-73.6201	-73.4613	-73.4356
29.55	-71.4902	-71.4833	-73.0704	-73.0334	-73.6343	-73.4137	-73.3732
29.6	-71.4709	-71.5152	-73.0552	-72.9998	-73.6602	-73.3741	-73.2968
29.65	-71.4474	-71.5854	-73.0177	-73.0065	-73.6984	-73.3503	-73.2219
29.7	-71.4288	-71.6887	-72.975	-73.0394	-73.7488	-73.341	-73.1602
29.75	-71.4294	-71.8093	-72.9415	-73.0749	-73.8075	-73.3389	-73.1174
29.8	-71.457	-71.9275	-72.9245	-73.0923	-73.8669	-73.3379	-73.0936
29.85	-71.5047	-72.0286	-72.9228	-73.0853	-73.9175	-73.335	-73.0832
29.9	-71.5515	-72.1075	-72.929	-73.0633	-73.9524	-73.3296	-73.0771
29.95	-71.5741	-72.1678	-72.9307	-73.0422	-73.9698	-73.3225	-73.066
30	-71.5597	-72.2175	-72.9165	-73.033	-73.9721	-73.3165	-73.0461
30.05	-71.5138	-72.264	-72.8827	-73.0357	-73.9622	-73.3148	-73.0201
30.1	-71.4556	-72.3101	-72.8361	-73.0435	-73.9388	-73.3176	-72.9952
30.15	-71.4045	-72.3532	-72.7892	-73.0511	-73.8975	-73.3212	-72.9779
30.2	-71.37	-72.3867	-72.7506	-73.0596	-73.8383	-73.32	-72.9702
30.25	-71.3513	-72.4026	-72.7212	-73.0742	-73.773	-73.3092	-72.9686
30.3	-71.3432	-72.3946	-72.6983	-73.0981	-73.7261	-73.2862	-72.9645
30.35	-71.3417	-72.358	-72.6822	-73.1291	-73.7239	-73.2514	-72.95
30.4	-71.3458	-72.2904	-72.6783	-73.1629	-73.7784	-73.2096	-72.9248
30.45	-71.3559	-72.1943	-72.6917	-73.1977	-73.8796	-73.1696	-72.9017
30.5	-71.3739	-72.0804	-72.7214	-73.2354	-74.0006	-73.14	-72.9002
30.55	-71.4012	-71.9696	-72.7568	-73.2776	-74.1115	-73.1238	-72.9313
30.6	-71.4362	-71.8881	-72.7802	-73.3192	-74.193	-73.1182	-72.985
30.65	-71.4722	-71.8578	-72.7745	-73.3479	-74.2405	-73.1194	-73.0363
30.7	-71.4989	-71.8844	-72.7326	-73.3508	-74.2601	-73.1276	-73.0653
30.75	-71.5098	-71.9542	-72.6626	-73.3237	-74.2628	-73.147	-73.074
30.8	-71.5083	-72.0404	-72.5847	-73.2759	-74.259	-73.1801	-73.0845
30.85	-71.5091	-72.1156	-72.5225	-73.2255	-74.2556	-73.224	-73.1213
30.9	-71.531	-72.1616	-72.4941	-73.1891	-74.253	-73.2716	-73.1946
30.95	-71.5862	-72.172	-72.5052	-73.1739	-74.2437	-73.3172	-73.2951
31	-71.6728	-72.1492	-72.5483	-73.1774	-74.2162	-73.3584	-73.4001
31.05	-71.7737	-72.1001	-72.605	-73.1927	-74.1621	-73.3932	-73.4831
31.1	-71.8636	-72.0334	-72.6516	-73.2136	-74.0814	-73.4161	-73.5213
31.15	-71.9204	-71.9597	-72.6686	-73.2366	-73.982	-73.4195	-73.5024
31.2	-71.9351	-71.8921	-72.6497	-73.2593	-73.8747	-73.3995	-73.4299
31.25	-71.9133	-71.8462	-72.6072	-73.2798	-73.7693	-73.362	-73.3239
31.3	-71.8703	-71.8339	-72.5681	-73.2978	-73.6729	-73.3218	-73.2152
31.35	-71.8249	-71.8573	-72.5601	-73.315	-73.5918	-73.296	-73.1361
31.4	-71.7935	-71.9065	-72.5938	-73.3328	-73.5335	-73.2938	-73.1088
31.45	-71.7845	-71.9641	-72.6562	-73.3499	-73.5068	-73.3102	-73.1372
31.5	-71.7927	-72.013	-72.7178	-73.3642	-73.517	-73.3278	-73.205
31.55	-71.7996	-72.0418	-72.7525	-73.3758	-73.5603	-73.3289	-73.2821
31.6	-71.7842	-72.0496	-72.7529	-73.3886	-73.6225	-73.3068	-73.3383
31.65	-71.7374	-72.0456	-72.7327	-73.4069	-73.6853	-73.2707	-73.3562
31.7	-71.6698	-72.0438	-72.7159	-73.4326	-73.7324	-73.2373	-73.3376
31.75	-71.6051	-72.052	-72.7223	-73.4631	-73.7523	-73.2186	-73.2997
31.8	-71.565	-72.066	-72.7572	-73.4923	-73.7375	-73.2163	-73.2634
31.85	-71.5558	-72.074	-72.8124	-73.5105	-73.6835	-73.2265	-73.2437
31.9	-71.5661	-72.0674	-72.8728	-73.5079	-73.5911	-73.2493	-73.245
31.95	-71.5742	-72.0491	-72.9239	-73.4803	-73.47	-73.2908	-73.2656
32	-71.561	-72.0303	-72.9556	-73.433	-73.3412	-73.3555	-73.3044
32.05	-71.5205	-72.0209	-72.963	-73.3797	-73.2337	-73.4368	-73.3628
32.1	-71.4635	-72.0212	-72.946	-73.3346	-73.1751	-73.5157	-73.4404
32.15	-71.414	-72.0216	-72.9094	-73.3052	-73.1793	-73.5698	-73.5283
32.2	-71.398	-72.0112	-72.8615	-73.2892	-73.2398	-73.5854	-73.6087
32.25	-71.4289	-71.9865	-72.8122	-73.2783	-73.3331	-73.5643	-73.6617
32.3	-71.4997	-71.956	-72.7704	-73.2657	-73.4311	-73.5201	-73.6739
32.35	-71.5857	-71.9349	-72.7416	-73.2505	-73.5127	-73.4691	-73.643
32.4	-71.6567	-71.9359	-72.7264	-73.2391	-73.5712	-73.4239	-73.5767
32.45	-71.6914	-71.9609	-72.722	-73.2407	-73.6127	-73.3923	-73.4891
32.5	-71.6854	-72.0006	-72.7257	-73.2619	-73.6476	-73.3817	-73.3965
32.55	-71.6516	-72.0411	-72.7388	-73.3019	-73.6796	-73.4018	-73.312
32.6	-71.6117	-72.0718	-72.765	-73.3517	-73.7016	-73.4611	-73.2435
32.65	-71.5842	-72.0912	-72.8068	-73.3977	-73.6993	-73.5603	-73.1936
32.7	-71.5762	-72.1036	-72.8613	-73.4284	-73.6628	-73.6864	-73.1629
32.75	-71.5842	-72.1125	-72.921	-73.439	-73.5946	-73.8143	-73.1523
32.8	-71.6011	-72.1174	-72.9794	-73.4311	-73.5119	-73.9133	-73.1644
32.85	-71.6222	-72.1155	-73.0349	-73.4082	-73.4375	-73.9597	-73.2013
32.9	-71.6442	-72.1075	-73.0893	-73.3737	-73.3882	-73.9454	-73.2617
32.95	-71.6613	-72.0993	-73.143	-73.3321	-73.3684	-73.8809	-73.3386
33	-71.6642	-72.0971	-73.193	-73.2925	-73.3723	-73.79	-73.4203
33.05	-71.6448	-72.1008	-73.2341	-73.2659	-73.3939	-73.7004	-73.4942
33.1	-71.6035	-72.1047	-73.2624	-73.2586	-73.4315	-73.635	-73.5518
33.15	-71.5513	-72.1048	-73.2779	-73.2669	-73.4862	-73.6059	-73.5911
33.2	-71.5044	-72.1044	-73.2846	-73.2788	-73.5529	-73.6116	-73.6154
33.25	-71.4749	-72.1111	-73.2881	-73.2832	-73.6172	-73.6409	-73.6282
33.3	-71.4641	-72.1297	-73.2908	-73.2767	-73.6626	-73.6802	-73.6289
33.35	-71.4648	-72.16	-73.2903	-73.2633	-73.6822	-73.721	-73.6109
33.4	-71.4693	-72.2002	-73.2808	-73.2481	-73.6835	-73.7613	-73.5679
33.45	-71.4747	-72.2495	-73.2562	-73.2315	-73.6806	-73.8019	-73.5017
33.5	-71.4822	-72.3056	-73.2112	-73.2111	-73.6804	-73.842	-73.4259
33.55	-71.4925	-72.3611	-73.1435	-73.1875	-73.6771	-73.8785	-73.3604
33.6	-71.5032	-72.405	-73.0577	-73.166	-73.6597	-73.9072	-73.3212
33.65	-71.5075	-72.4278	-72.9685	-73.1522	-73.6255	-73.9252	-73.3122
33.7	-71.4947	-72.4268	-72.8976	-73.1452	-73.5853	-73.9315	-73.3233
33.75	-71.4538	-72.4055	-72.8622	-73.1368	-73.5589	-73.9278	-73.3369
33.8	-71.378	-72.3717	-72.8672	-73.1194	-73.5615	-73.9173	-73.3377
33.85	-71.2705	-72.3358	-72.904	-73.0958	-73.5948	-73.9042	-73.3216
33.9	-71.146	-72.3076	-72.9575	-73.0814	-73.6467	-73.8916	-73.2956
33.95	-71.0287	-72.2924	-73.0128	-73.0965	-73.6982	-73.8807	-73.2717
34	-70.9465	-72.2885	-73.0606	-73.1525	-73.732	-73.8691	-73.2581
34.05	-70.9208	-72.2873	-73.0979	-73.2447	-73.7371	-73.8511	-73.2562
34.1	-70.9578	-72.2793	-73.1258	-73.354	-73.7131	-73.8219	-73.2608
34.15	-71.0454	-72.2592	-73.1448	-73.4552	-73.6709	-73.7816	-73.2634
34.2	-71.1583	-72.228	-73.1519	-73.5242	-73.6288	-73.7376	-73.256
34.25	-71.2682	-72.1905	-73.1415	-73.5428	-73.6035	-73.7014	-73.2345
34.3	-71.353	-72.1516	-73.1091	-73.5021	-73.6013	-73.6827	-73.2015
34.35	-71.4018	-72.1159	-73.0551	-73.4055	-73.6173	-73.6836	-73.165
34.4	-71.4158	-72.088	-72.9873	-73.2702	-73.6411	-73.696	-73.1355
34.45	-71.4061	-72.0725	-72.9197	-73.1232	-73.6641	-73.7057	-73.1229
34.5	-71.3908	-72.0709	-72.8666	-72.9935	-73.6827	-73.6997	-73.1329
34.55	-71.3892	-72.0801	-72.8354	-72.9027	-73.6977	-73.6728	-73.1648
34.6	-71.4162	-72.0917	-72.8221	-72.8599	-73.7122	-73.6287	-73.2129
34.65	-71.476	-72.0932	-72.8143	-72.862	-73.7289	-73.5769	-73.2696
34.7	-71.5601	-72.0704	-72.7991	-72.8979	-73.7496	-73.5285	-73.3273
34.75	-71.6503	-72.0156	-72.7706	-72.9546	-73.7772	-73.4917	-73.3789
34.8	-71.7264	-71.9347	-72.7323	-73.021	-73.8182	-73.4678	-73.4173
34.85	-71.7752	-71.8486	-72.695	-73.0904	-73.8798	-73.449	-73.4366
34.9	-71.7966	-71.7836	-72.6712	-73.1608	-73.9624	-73.4226	-73.4362
34.95	-71.8021	-71.7579	-72.6686	-73.2325	-74.0543	-73.3797	-73.4225
35	-71.8075	-71.7723	-72.686	-73.3054	-74.1331	-73.3223	-73.4084
35.05	-71.8239	-71.8113	-72.7126	-73.377	-74.1758	-73.2628	-73.4084
35.1	-71.8526	-71.8509	-72.7343	-73.4432	-74.1707	-73.2167	-73.4351
35.15	-71.887	-71.8697	-72.7431	-73.4988	-74.1234	-73.1948	-73.4966
35.2	-71.9179	-71.8572	-72.742	-73.5397	-74.0517	-73.1997	-73.5931
35.25	-71.9383	-71.8163	-72.7424	-73.5638	-73.9732	-73.227	-73.7129
35.3	-71.9452	-71.7599	-72.7546	-73.5729	-73.894	-73.2702	-73.8316
35.35	-71.9387	-71.7059	-72.779	-73.5722	-73.8084	-73.323	-73.9162
35.4	-71.9213	-71.6712	-72.8046	-73.5683	-73.7094	-73.381	-73.9377
35.45	-71.8966	-71.6678	-72.8167	-73.5672	-73.6008	-73.4408	-73.8844
35.5	-71.8686	-71.6993	-72.8089	-73.5722	-73.4999	-73.4983	-73.7703
35.55	-71.8389	-71.7618	-72.79	-73.5833	-73.4295	-73.5467	-73.632
35.6	-71.8037	-71.8453	-72.7815	-73.5976	-73.4048	-73.5762	-73.5125
35.65	-71.7557	-71.9361	-72.8045	-73.6099	-73.4255	-73.5775	-73.4422
35.7	-71.6924	-72.0191	-72.8651	-73.6133	-73.4775	-73.547	-73.4276
35.75	-71.624	-72.0796	-72.9497	-73.5992	-73.5424	-73.4922	-73.4539
35.8	-71.5723	-72.1063	-73.0313	-73.5599	-73.6081	-73.4295	-73.4948
35.85	-71.5583	-72.0951	-73.0846	-73.4927	-73.6695	-73.3798	-73.5224
35.9	-71.5899	-72.0526	-73.0992	-73.4047	-73.7243	-73.361	-73.516
35.95	-71.6564	-71.9954	-73.0821	-73.3108	-73.7695	-73.3842	-73.4698
36	-71.7347	-71.9453	-73.0511	-73.2276	-73.8036	-73.4507	-73.398
36.05	-71.8006	-71.9197	-73.0238	-73.1672	-73.8294	-73.5492	-73.3307
36.1	-71.839	-71.9243	-73.0115	-73.1345	-73.8523	-73.657	-73.2994
36.15	-71.8497	-71.9542	-73.0196	-73.1284	-73.8747	-73.745	-73.3191
36.2	-71.844	-72.0009	-73.0478	-73.1434	-73.8932	-73.7884	-73.3812
36.25	-71.8368	-72.0584	-73.0887	-73.1718	-73.8989	-73.7765	-73.4586
36.3	-71.8394	-72.1246	-73.1284	-73.205	-73.8833	-73.7169	-73.5215
36.35	-71.8546	-72.195	-73.1539	-73.2361	-73.8431	-73.6321	-73.5521
36.4	-71.8759	-72.2586	-73.1614	-73.261	-73.7813	-73.551	-73.5503
36.45	-71.8886	-72.2981	-73.1583	-73.2807	-73.7043	-73.4996	-73.5297
36.5	-71.8753	-72.2995	-73.1546	-73.3006	-73.622	-73.4927	-73.508
36.55	-71.8224	-72.2616	-73.1543	-73.3271	-73.5486	-73.5283	-73.4982
36.6	-71.7273	-72.2018	-73.1546	-73.3627	-73.5028	-73.5886	-73.5042
36.65	-71.601	-72.1515	-73.1535	-73.4032	-73.4999	-73.6479	-73.5196
36.7	-71.467	-72.1414	-73.1548	-73.4409	-73.5415	-73.6861	-73.5322
36.75	-71.3559	-72.185	-73.1654	-73.4684	-73.6127	-73.6992	-73.5292
36.8	-71.2956	-72.2691	-73.1852	-73.4821	-73.6886	-73.7	-73.5044
36.85	-71.3009	-72.36	-73.2034	-73.4823	-73.7459	-73.7101	-73.4594
36.9	-71.3675	-72.423	-73.2044	-73.4708	-73.7712	-73.7448	-73.4009
36.95	-71.4724	-72.442	-73.1797	-73.448	-73.7628	-73.8033	-73.3381
37	-71.5803	-72.4256	-73.1348	-73.4123	-73.7268	-73.8688	-73.2831
37.05	-71.6544	-72.3979	-73.0856	-73.3623	-73.6759	-73.9198	-73.2508
37.1	-71.669	-72.3825	-73.0509	-73.3016	-73.6274	-73.945	-73.254
37.15	-71.6214	-72.3904	-73.0446	-73.2409	-73.6027	-73.9491	-73.2949
37.2	-71.5339	-72.4176	-73.0721	-73.1944	-73.6218	-73.9474	-73.3604
37.25	-71.4435	-72.4529	-73.127	-73.1725	-73.6941	-73.9533	-73.4248
37.3	-71.3838	-72.4859	-73.1912	-73.1758	-73.8113	-73.9688	-73.4619
37.35	-71.3679	-72.5116	-73.2408	-73.1938	-73.9467	-73.9869	-73.4567
37.4	-71.3833	-72.5278	-73.2581	-73.2096	-74.0665	-73.9998	-73.4114
37.45	-71.4007	-72.5316	-73.2412	-73.2077	-74.1452	-74.0047	-73.3427
37.5	-71.3938	-72.5203	-73.2039	-73.1814	-74.177	-74.0014	-73.2723
37.55	-71.3562	-72.4939	-73.1662	-73.1353	-74.1746	-73.9863	-73.2181
37.6	-71.3062	-72.4563	-73.1422	-73.0842	-74.158	-73.9516	-73.1879
37.65	-71.2751	-72.4121	-73.1335	-73.0465	-74.1405	-73.8948	-73.179
37.7	-71.2879	-72.3653	-73.1314	-73.0353	-74.1245	-73.8247	-73.1816
37.75	-71.3481	-72.3199	-73.1245	-73.05	-74.106	-73.7582	-73.1849
37.8	-71.4346	-72.2812	-73.1057	-73.0753	-74.0827	-73.7084	-73.1828
37.85	-71.511	-72.2554	-73.0735	-73.0898	-74.0579	-73.6778	-73.1756
37.9	-71.5449	-72.246	-73.0315	-73.0805	-74.0396	-73.6617	-73.1672
37.95	-71.5241	-72.25	-72.9848	-73.0514	-74.035	-73.6565	-73.1618
38	-71.4637	-72.2552	-72.9379	-73.0224	-74.0458	-73.663	-73.1617
38.05	-71.3957	-72.2433	-72.8939	-73.0185	-74.0671	-73.682	-73.168
38.1	-71.3517	-72.1974	-72.8555	-73.0582	-74.0898	-73.7095	-73.1817
38.15	-71.3473	-72.1125	-72.8275	-73.1427	-74.1053	-73.7358	-73.2027
38.2	-71.3802	-72.0004	-72.8158	-73.2532	-74.108	-73.7514	-73.229
38.25	-71.4387	-71.886	-72.8218	-73.3566	-74.0959	-73.752	-73.255
38.3	-71.5107	-71.7981	-72.8396	-73.4207	-74.0698	-73.7411	-73.2727
38.35	-71.5855	-71.7577	-72.8572	-73.4304	-74.033	-73.7246	-73.276
38.4	-71.6494	-71.7702	-72.8642	-73.3969	-73.9905	-73.7044	-73.2668
38.45	-71.6848	-71.8252	-72.8562	-73.3521	-73.949	-73.6768	-73.2556
38.5	-71.6772	-71.9047	-72.8364	-73.3303	-73.9165	-73.6366	-73.2562
38.55	-71.6255	-71.9925	-72.8136	-73.3484	-73.9013	-73.5834	-73.2763
38.6	-71.5476	-72.0779	-72.7994	-73.3985	-73.9086	-73.5246	-73.3138
38.65	-71.4725	-72.1539	-72.8039	-73.4576	-73.9367	-73.4719	-73.3605
38.7	-71.4261	-72.2144	-72.8313	-73.5037	-73.9764	-73.4364	-73.4073
38.75	-71.4176	-72.2549	-72.8777	-73.5289	-74.0158	-73.4243	-73.4468
38.8	-71.4386	-72.2764	-72.9319	-73.5395	-74.0464	-73.4369	-73.4726
38.85	-71.4725	-72.2843	-72.9797	-73.5468	-74.0657	-73.4716	-73.4799
38.9	-71.5048	-72.2844	-73.0094	-73.5587	-74.075	-73.522	-73.4687
38.95	-71.5263	-72.2761	-73.0154	-73.5774	-74.0751	-73.5757	-73.4463
39	-71.533	-72.2494	-72.9985	-73.6025	-74.0635	-73.6156	-73.426
39.05	-71.5244	-72.1885	-72.9629	-73.6339	-74.0351	-73.6231	-73.4203
39.1	-71.5043	-72.0822	-72.9138	-73.6699	-73.9871	-73.586	-73.4355
39.15	-71.4797	-71.9362	-72.8578	-73.7053	-73.9218	-73.5043	-73.4686
39.2	-71.4583	-71.7763	-72.8054	-73.7317	-73.8445	-73.3921	-73.5079
39.25	-71.4468	-71.6408	-72.7715	-73.7421	-73.7582	-73.2744	-73.5373
39.3	-71.4514	-71.5631	-72.7712	-73.7342	-73.6618	-73.1792	-73.5434
39.35	-71.4759	-71.5595	-72.8112	-73.7115	-73.5558	-73.1281	-73.5213
39.4	-71.5206	-71.6246	-72.8825	-73.6824	-73.4495	-73.1303	-73.4774
39.45	-71.5815	-71.7377	-72.9602	-73.6583	-73.3641	-73.1821	-73.4274
39.5	-71.6517	-71.8714	-73.0151	-73.6499	-73.3257	-73.2716	-73.3908
39.55	-71.7231	-71.9996	-73.029	-73.662	-73.3526	-73.3853	-73.3853
39.6	-71.7876	-72.1017	-73.0048	-73.6903	-73.4428	-73.5123	-73.4209
39.65	-71.8388	-72.1641	-72.963	-73.7216	-73.5724	-73.6451	-73.4954
39.7	-71.874	-72.1844	-72.9293	-73.7401	-73.7054	-73.7767	-73.5929
39.75	-71.8929	-72.1717	-72.92	-73.7342	-73.8091	-73.8969	-73.6878
39.8	-71.8928	-72.1447	-72.9346	-73.7013	-73.8648	-73.9924	-73.7519
39.85	-71.8679	-72.1213	-72.9585	-73.6481	-73.869	-74.0517	-73.7634
39.9	-71.8149	-72.1096	-72.9742	-73.5865	-73.828	-74.0713	-73.7159
39.95	-71.7429	-72.1039	-72.9722	-73.5294	-73.752	-74.0601	-73.6235
40	-71.6736	-72.0913	-72.9563	-73.4864	-73.651	-74.0342	-73.5175
40.05	-71.6315	-72.063	-72.9415	-73.462	-73.5344	-74.0085	-73.4344
40.1	-71.6289	-72.0215	-72.9475	-73.4552	-73.4138	-73.9892	-73.4014
40.15	-71.6593	-71.9812	-72.9886	-73.4618	-73.3062	-73.9738	-73.4264
40.2	-71.7033	-71.9601	-73.0651	-73.4779	-73.2335	-73.9565	-73.4984
40.25	-71.7414	-71.9695	-73.1579	-73.5018	-73.2142	-73.9345	-73.5939
40.3	-71.7615	-72.0067	-73.2335	-73.532	-73.253	-73.9093	-73.6874
40.35	-71.7589	-72.0555	-73.2585	-73.5636	-73.3344	-73.8855	-73.7601
40.4	-71.7288	-72.0952	-73.2162	-73.5897	-73.4266	-73.8687	-73.8035
40.45	-71.665	-72.114	-73.1167	-73.605	-73.4942	-73.8639	-73.8164
40.5	-71.5665	-72.1152	-72.9926	-73.6082	-73.5143	-73.8715	-73.8021
40.55	-71.445	-72.1146	-72.884	-73.6004	-73.4854	-73.8846	-73.7653
40.6	-71.3249	-72.1288	-72.8212	-73.5825	-73.4281	-73.8915	-73.7104
40.65	-71.2316	-72.166	-72.8137	-73.5535	-73.3758	-73.8835	-73.6408
40.7	-71.1757	-72.2226	-72.8499	-73.5111	-73.3594	-73.8626	-73.5592
40.75	-71.1479	-72.2865	-72.9052	-73.4526	-73.3913	-73.8405	-73.4698
40.8	-71.1284	-72.3444	-72.9509	-73.3784	-73.4588	-73.8302	-73.3813
40.85	-71.1035	-72.3866	-72.9643	-73.2947	-73.5319	-73.836	-73.3063
40.9	-71.0769	-72.4075	-72.9351	-73.2139	-73.5824	-73.8497	-73.2592
40.95	-71.0653	-72.404	-72.8688	-73.1493	-73.6019	-73.8561	-73.2509
41	-71.0844	-72.3754	-72.7836	-73.1094	-73.6068	-73.8423	-73.2831
41.05	-71.1359	-72.3278	-72.7001	-73.0944	-73.6258	-73.8051	-73.3461
41.1	-71.2064	-72.2768	-72.6322	-73.0979	-73.6787	-73.7524	-73.4235
41.15	-71.2768	-72.2423	-72.5838	-73.1117	-73.7618	-73.7009	-73.5002
41.2	-71.3325	-72.2374	-72.5529	-73.1308	-73.8499	-73.6689	-73.5694
41.25	-71.3689	-72.2601	-72.5381	-73.1551	-73.9152	-73.669	-73.631
41.3	-71.3891	-72.2955	-72.542	-73.1858	-73.9478	-73.7019	-73.6874
41.35	-71.3993	-72.3268	-72.5693	-73.2209	-73.9621	-73.756	-73.7391
41.4	-71.4045	-72.3441	-72.623	-73.2553	-73.9841	-73.8148	-73.7837
41.45	-71.4087	-72.3461	-72.7012	-73.2841	-74.0305	-73.8654	-73.8176
41.5	-71.416	-72.3358	-72.7963	-73.3051	-74.0952	-73.9032	-73.8378
41.55	-71.4289	-72.3161	-72.8956	-73.3179	-74.1543	-73.9292	-73.8438
41.6	-71.4456	-72.2893	-72.9833	-73.3205	-74.1832	-73.9452	-73.8387
41.65	-71.4592	-72.2596	-73.0441	-73.3115	-74.1729	-73.9507	-73.8272
41.7	-71.4626	-72.2334	-73.0688	-73.2947	-74.1334	-73.9442	-73.8133
41.75	-71.4551	-72.2166	-73.0599	-73.2809	-74.0836	-73.9254	-73.7987
41.8	-71.4444	-72.2111	-73.0295	-73.2843	-74.0392	-73.8979	-73.7822
41.85	-71.4432	-72.2135	-72.9931	-73.3138	-74.0073	-73.868	-73.7616
41.9	-71.4604	-72.2156	-72.9608	-73.369	-73.9885	-73.8409	-73.736
41.95	-71.4959	-72.2076	-72.9346	-73.4418	-73.9798	-73.8189	-73.7077
42	-71.5414	-72.1818	-72.9087	-73.5224	-73.9758	-73.8026	-73.6804
42.05	-71.5864	-72.1381	-72.874	-73.6014	-73.97	-73.794	-73.657
42.1	-71.6227	-72.0858	-72.8237	-73.6693	-73.957	-73.796	-73.6395
42.15	-71.6447	-72.0376	-72.7581	-73.7167	-73.9352	-73.8095	-73.6308
42.2	-71.6472	-72.0032	-72.6872	-73.7352	-73.9057	-73.8308	-73.6359
42.25	-71.6252	-71.9847	-72.6278	-73.7217	-73.87	-73.8518	-73.6608
42.3	-71.5761	-71.9783	-72.5978	-73.6799	-73.8291	-73.8646	-73.7065
42.35	-71.5053	-71.9769	-72.6102	-73.6199	-73.785	-73.8654	-73.7636
42.4	-71.4293	-71.9731	-72.6681	-73.554	-73.7426	-73.8572	-73.8125
42.45	-71.3709	-71.9617	-72.7633	-73.4928	-73.7091	-73.8491	-73.8308
42.5	-71.3485	-71.9421	-72.8782	-73.4425	-73.6894	-73.8522	-73.804
42.55	-71.3645	-71.917	-72.9914	-73.4065	-73.6822	-73.8746	-73.7314
42.6	-71.404	-71.89	-73.0837	-73.3875	-73.6803	-73.9179	-73.6241
42.65	-71.4434	-71.8619	-73.1427	-73.388	-73.6756	-73.9751	-73.4995
42.7	-71.465	-71.831	-73.1624	-73.4078	-73.6654	-74.0335	-73.3764
42.75	-71.4667	-71.794	-73.1435	-73.4426	-73.6543	-74.0789	-73.2718
42.8	-71.4614	-71.7496	-73.0938	-73.4852	-73.6514	-74.1012	-73.2006
42.85	-71.4667	-71.7021	-73.0287	-73.528	-73.6651	-74.0987	-73.1733
42.9	-71.4932	-71.6616	-72.9684	-73.5658	-73.6968	-74.0787	-73.1955
42.95	-71.5387	-71.6395	-72.9302	-73.5956	-73.7385	-74.0546	-73.2675
43	-71.5922	-71.6417	-72.9221	-73.6171	-73.7753	-74.0382	-73.3837
43.05	-71.6414	-71.6651	-72.9401	-73.6318	-73.7958	-74.0315	-73.5318
43.1	-71.6792	-71.6991	-72.9711	-73.6434	-73.8	-74.0246	-73.6924
43.15	-71.7046	-71.7309	-72.9997	-73.6564	-73.7983	-74.0014	-73.8417
43.2	-71.7208	-71.7523	-73.0153	-73.6743	-73.8013	-73.9504	-73.9576
43.25	-71.7309	-71.7607	-73.0157	-73.6969	-73.8088	-73.8714	-74.0258
43.3	-71.7343	-71.7578	-73.0062	-73.7193	-73.8102	-73.7764	-74.0422
43.35	-71.7271	-71.7457	-72.9961	-73.7342	-73.7939	-73.6829	-74.0127
43.4	-71.7059	-71.7262	-72.9939	-73.7353	-73.7583	-73.6074	-73.9521
43.45	-71.6723	-71.7028	-73.0054	-73.7208	-73.7159	-73.5606	-73.8826
43.5	-71.6323	-71.6811	-73.0314	-73.6942	-73.6864	-73.5469	-73.8287
43.55	-71.5921	-71.6679	-73.067	-73.6632	-73.6852	-73.5656	-73.807
43.6	-71.5547	-71.6686	-73.1043	-73.637	-73.7137	-73.6124	-73.8181
43.65	-71.5197	-71.6865	-73.1386	-73.6217	-73.7593	-73.6795	-73.8464
43.7	-71.4845	-71.7224	-73.1734	-73.6166	-73.8032	-73.7587	-73.8704
43.75	-71.4458	-71.7744	-73.2175	-73.6143	-73.8308	-73.843	-73.8744
43.8	-71.4	-71.8382	-73.2755	-73.6051	-73.8385	-73.9264	-73.8566
43.85	-71.3455	-71.9106	-73.3389	-73.5812	-73.8336	-74.0006	-73.8283
43.9	-71.2845	-71.9906	-73.3864	-73.5392	-73.8278	-74.0543	-73.8053
43.95	-71.2245	-72.0767	-73.3964	-73.4822	-73.8293	-74.0756	-73.7979
44	-71.1762	-72.162	-73.3622	-73.4206	-73.839	-74.058	-73.8045
44.05	-71.1505	-72.2343	-73.2979	-73.3712	-73.8521	-74.0032	-73.8145
44.1	-71.1525	-72.2823	-73.2306	-73.3501	-73.8635	-73.9216	-73.8149
44.15	-71.1783	-72.3039	-73.1813	-73.3634	-73.8718	-73.8303	-73.7972
44.2	-71.216	-72.3072	-73.1527	-73.4021	-73.8785	-73.75	-73.76
44.25	-71.2507	-72.3047	-73.1334	-73.4436	-73.8845	-73.6981	-73.7094
44.3	-71.2723	-72.3039	-73.1143	-73.4643	-73.888	-73.682	-73.6588
44.35	-71.2783	-72.3053	-73.0992	-73.4538	-73.887	-73.696	-73.6251
44.4	-71.2743	-72.3048	-73.1003	-73.4219	-73.8826	-73.7263	-73.6214
44.45	-71.2691	-72.3003	-73.1221	-73.3908	-73.8801	-73.759	-73.6502
44.5	-71.2688	-72.2927	-73.1539	-73.3781	-73.8844	-73.7852	-73.7003
44.55	-71.2725	-72.2836	-73.1761	-73.3844	-73.8951	-73.8019	-73.7512
44.6	-71.2728	-72.2709	-73.1756	-73.3954	-73.9056	-73.81	-73.7834
44.65	-71.2617	-72.2492	-73.1544	-73.3927	-73.9091	-73.8118	-73.7888
44.7	-71.2369	-72.213	-73.1252	-73.3643	-73.9028	-73.8092	-73.7735
44.75	-71.2023	-72.1624	-73.101	-73.3076	-73.8876	-73.8038	-73.7507
44.8	-71.1644	-72.1074	-73.0864	-73.2273	-73.866	-73.7963	-73.7273
44.85	-71.1281	-72.0641	-73.0766	-73.1322	-73.8401	-73.7858	-73.6994
44.9	-71.0967	-72.0464	-73.0624	-73.0343	-73.8151	-73.7673	-73.6577
44.95	-71.0744	-72.0577	-73.0345	-72.9473	-73.801	-73.7346	-73.5969
45	-71.068	-72.0889	-72.9886	-72.8861	-73.8104	-73.6857	-73.5211
45.05	-71.0865	-72.1245	-72.9262	-72.8639	-73.8494	-73.628	-73.4421
45.1	-71.1371	-72.1486	-72.8535	-72.8901	-73.909	-73.576	-73.3737
45.15	-71.2206	-72.1499	-72.7761	-72.9675	-73.965	-73.5428	-73.3254
45.2	-71.3271	-72.1237	-72.6957	-73.0898	-73.9901	-73.5329	-73.2979
45.25	-71.4368	-72.0727	-72.613	-73.2401	-73.9701	-73.5405	-73.2853
45.3	-71.524	-72.006	-72.5336	-73.3923	-73.9116	-73.5563	-73.2818
45.35	-71.5657	-71.9355	-72.4686	-73.5174	-73.8378	-73.5732	-73.2882
45.4	-71.5504	-71.8722	-72.4291	-73.5943	-73.776	-73.5878	-73.3107
45.45	-71.4838	-71.8235	-72.4183	-73.617	-73.7461	-73.5967	-73.3534
45.5	-71.3889	-71.7922	-72.4306	-73.5949	-73.7553	-73.5925	-73.4109
45.55	-71.2987	-71.7774	-72.4557	-73.5455	-73.7983	-73.5666	-73.4687
45.6	-71.2459	-71.7768	-72.4841	-73.4857	-73.8617	-73.5166	-73.5111
45.65	-71.2507	-71.788	-72.5108	-73.4303	-73.9285	-73.452	-73.5308
45.7	-71.3127	-71.807	-72.5371	-73.3938	-73.9838	-73.3936	-73.5322
45.75	-71.4114	-71.8276	-72.5698	-73.3908	-74.0193	-73.3638	-73.5257
45.8	-71.5163	-71.8427	-72.6172	-73.4285	-74.0362	-73.3753	-73.5204
45.85	-71.6014	-71.8475	-72.6824	-73.498	-74.0446	-73.4242	-73.5211
45.9	-71.656	-71.8414	-72.7589	-73.5753	-74.0567	-73.4922	-73.5299
45.95	-71.6865	-71.825	-72.8326	-73.6323	-74.0773	-73.5571	-73.5481
46	-71.7052	-71.7976	-72.8894	-73.6496	-74.1005	-73.603	-73.5737
46.05	-71.7183	-71.7574	-72.9229	-73.6251	-74.1146	-73.6246	-73.6001
46.1	-71.7201	-71.7053	-72.9372	-73.5737	-74.1124	-73.6262	-73.621
46.15	-71.7014	-71.65	-72.9431	-73.5209	-74.0965	-73.6194	-73.6363
46.2	-71.6615	-71.6082	-72.9505	-73.4908	-74.0773	-73.6209	-73.6531
46.25	-71.6133	-71.5987	-72.9621	-73.4943	-74.066	-73.6461	-73.6772
46.3	-71.5769	-71.6327	-72.9745	-73.5251	-74.0685	-73.6999	-73.7046
46.35	-71.5672	-71.7057	-72.9839	-73.5647	-74.0839	-73.7707	-73.7219
46.4	-71.5847	-71.7992	-72.9906	-73.5942	-74.1072	-73.8351	-73.7176
46.45	-71.6169	-71.8892	-72.998	-73.6021	-74.1312	-73.8702	-73.6919
46.5	-71.6474	-71.9576	-73.0073	-73.5866	-74.1486	-73.8667	-73.6569
46.55	-71.6688	-71.9982	-73.0155	-73.5514	-74.153	-73.8312	-73.6285
46.6	-71.6875	-72.0166	-73.019	-73.5004	-74.1408	-73.7802	-73.6182
46.65	-71.7163	-72.024	-73.018	-73.4352	-74.1133	-73.7296	-73.6327
46.7	-71.7611	-72.029	-73.0177	-73.3563	-74.0756	-73.6879	-73.6755
46.75	-71.8138	-72.0327	-73.0228	-73.2691	-74.0339	-73.6563	-73.7459
46.8	-71.8583	-72.029	-73.0345	-73.1872	-73.9915	-73.6331	-73.8362
46.85	-71.8841	-72.0094	-73.0503	-73.1298	-73.9487	-73.6186	-73.9286
46.9	-71.8949	-71.9682	-73.0664	-73.1128	-73.9039	-73.6172	-73.9987
46.95	-71.9049	-71.9049	-73.0776	-73.1392	-73.8557	-73.6335	-74.0258
47	-71.9237	-71.825	-73.0775	-73.1933	-73.8037	-73.6674	-74.0057
47.05	-71.9468	-71.7385	-73.062	-73.2468	-73.7508	-73.7115	-73.9554
47.1	-71.9583	-71.6592	-73.0332	-73.2733	-73.7041	-73.7545	-73.9037
47.15	-71.945	-71.6028	-73.0012	-73.2636	-73.6729	-73.7867	-73.8728
47.2	-71.9071	-71.5832	-72.9806	-73.2306	-73.6655	-73.8031	-73.8641
47.25	-71.8583	-71.608	-72.9846	-73.2002	-73.6834	-73.8035	-73.8588
47.3	-71.8153	-71.6752	-73.0189	-73.1955	-73.7176	-73.7916	-73.8344
47.35	-71.7886	-71.7737	-73.0798	-73.2262	-73.7503	-73.7752	-73.7838
47.4	-71.7786	-71.8875	-73.1564	-73.2853	-73.7636	-73.7638	-73.7218
47.45	-71.7765	-72.0002	-73.2347	-73.3537	-73.7487	-73.7647	-73.6754
47.5	-71.7674	-72.0983	-73.3003	-73.4092	-73.7091	-73.778	-73.6637
47.55	-71.7378	-72.1726	-73.3393	-73.437	-73.654	-73.7962	-73.6856
47.6	-71.6829	-72.2189	-73.3403	-73.4367	-73.5901	-73.8094	-73.7217
47.65	-71.609	-72.2372	-73.2992	-73.4199	-73.5197	-73.8133	-73.7459
47.7	-71.5304	-72.231	-73.2228	-73.3987	-73.444	-73.8117	-73.7384
47.75	-71.4611	-72.2077	-73.128	-73.3759	-73.3688	-73.812	-73.6931
47.8	-71.409	-72.1795	-73.0356	-73.3435	-73.3047	-73.817	-73.6195
47.85	-71.3744	-72.1614	-72.9627	-73.2928	-73.2642	-73.8223	-73.5389
47.9	-71.3505	-72.166	-72.9155	-73.2258	-73.256	-73.8213	-73.4739
47.95	-71.3276	-72.1964	-72.8883	-73.1563	-73.2823	-73.8137	-73.4379
48	-71.2975	-72.241	-72.8693	-73.1021	-73.3401	-73.8083	-73.4301
48.05	-71.2571	-72.2766	-72.8495	-73.0745	-73.4229	-73.8153	-73.4399
48.1	-71.2086	-72.2787	-72.8278	-73.0748	-73.5222	-73.8373	-73.4538
48.15	-71.1573	-72.2365	-72.8093	-73.0958	-73.6266	-73.8654	-73.4613
48.2	-71.1098	-72.1628	-72.7996	-73.1248	-73.72	-73.885	-73.4572
48.25	-71.0733	-72.0879	-72.7991	-73.1463	-73.785	-73.8867	-73.441
48.3	-71.0563	-72.0439	-72.8009	-73.1471	-73.8088	-73.8738	-73.4153
48.35	-71.0664	-72.0471	-72.794	-73.1231	-73.7895	-73.8582	-73.383
48.4	-71.1075	-72.0917	-72.7708	-73.0824	-73.7357	-73.8508	-73.3464
48.45	-71.1769	-72.1557	-72.7328	-73.0417	-73.6636	-73.8544	-73.3071
48.5	-71.2657	-72.2126	-72.6915	-73.0184	-73.5928	-73.8657	-73.2674
48.55	-71.3625	-72.2429	-72.661	-73.0258	-73.5444	-73.8817	-73.2325
48.6	-71.4571	-72.2393	-72.6505	-73.0701	-73.5357	-73.9012	-73.2112
48.65	-71.5434	-72.2073	-72.6607	-73.1499	-73.574	-73.9207	-73.2144
48.7	-71.6179	-72.1598	-72.6863	-73.2577	-73.6525	-73.9333	-73.2508
48.75	-71.6782	-72.1091	-72.7217	-73.3814	-73.754	-73.9338	-73.3215
48.8	-71.7211	-72.0631	-72.7643	-73.5063	-73.8572	-73.9249	-73.4162
48.85	-71.7418	-72.0237	-72.8146	-73.6155	-73.9425	-73.9164	-73.5142
48.9	-71.737	-71.9894	-72.8731	-73.6909	-73.9943	-73.9171	-73.5881
48.95	-71.709	-71.959	-72.9359	-73.7168	-74.0036	-73.9265	-73.6128
49	-71.6682	-71.9337	-72.993	-73.685	-73.9731	-73.9344	-73.5759
49.05	-71.6296	-71.9158	-73.0309	-73.6008	-73.9201	-73.9279	-73.4851
49.1	-71.6048	-71.9063	-73.0378	-73.4831	-73.8725	-73.901	-73.3654
49.15	-71.5947	-71.9037	-73.0103	-73.3588	-73.8574	-73.8577	-73.247
49.2	-71.5909	-71.9058	-72.9568	-73.254	-73.8861	-73.8079	-73.1522
49.25	-71.5834	-71.9117	-72.8962	-73.1864	-73.9457	-73.7608	-73.0909
49.3	-71.5706	-71.9205	-72.8486	-73.1618	-74.0031	-73.7207	-73.0637
49.35	-71.5603	-71.9294	-72.8259	-73.1758	-74.0221	-73.686	-73.0677
49.4	-71.5623	-71.9321	-72.8275	-73.2178	-73.9845	-73.6514	-73.1002
49.45	-71.5793	-71.922	-72.8448	-73.2767	-73.9032	-73.6116	-73.1587
49.5	-71.6055	-71.8967	-72.8687	-73.3443	-73.8167	-73.5656	-73.2404
49.55	-71.6321	-71.8602	-72.8937	-73.4141	-73.7677	-73.5192	-73.3406
49.6	-71.6547	-71.8216	-72.9185	-73.4781	-73.7788	-73.482	-73.4507
49.65	-71.6742	-71.7894	-72.9428	-73.5248	-73.842	-73.464	-73.5584
49.7	-71.6931	-71.7681	-72.9658	-73.5446	-73.927	-73.4727	-73.6496
49.75	-71.7118	-71.7587	-72.9845	-73.5346	-74.0027	-73.5117	-73.711
49.8	-71.7275	-71.7608	-72.9934	-73.5015	-74.0528	-73.578	-73.7334
49.85	-71.7355	-71.7731	-72.9854	-73.4575	-74.076	-73.6604	-73.714
49.9	-71.7314	-71.7925	-72.9543	-73.4146	-74.0757	-73.7419	-73.6584
49.95	-71.7124	-71.8135	-72.8986	-73.3816	-74.0519	-73.8069	-73.58
50	-71.6785	-71.8304	-72.8237	-73.3652	-74.0025	-73.8487	-73.496
50.05	-71.6331	-71.8395	-72.7417	-73.3708	-73.931	-73.8714	-73.4231
50.1	-71.5843	-71.8396	-72.6679	-73.3999	-73.8506	-73.8868	-73.3733
50.15	-71.5434	-71.8326	-72.6189	-73.4466	-73.7793	-73.9072	-73.3541
50.2	-71.5211	-71.8241	-72.6078	-73.5001	-73.7312	-73.9396	-73.3673
50.25	-71.5225	-71.8226	-72.6403	-73.5504	-73.7091	-73.9831	-73.4088
50.3	-71.5453	-71.8349	-72.7098	-73.5929	-73.706	-74.0309	-73.4673
50.35	-71.5806	-71.8603	-72.8005	-73.6252	-73.7118	-74.0744	-73.5276
50.4	-71.615	-71.8902	-72.8944	-73.6411	-73.7184	-74.1064	-73.5755
50.45	-71.6343	-71.9137	-72.9801	-73.6298	-73.7185	-74.1235	-73.6019
50.5	-71.6295	-71.9252	-73.0548	-73.5824	-73.704	-74.1259	-73.6039
50.55	-71.6026	-71.927	-73.1192	-73.5002	-73.6694	-74.1172	-73.5848
50.6	-71.5658	-71.9264	-73.1706	-73.3994	-73.618	-74.1037	-73.5509
50.65	-71.5328	-71.9298	-73.2019	-73.3081	-73.5632	-74.0917	-73.5086
50.7	-71.5095	-71.9396	-73.2061	-73.2569	-73.521	-74.0857	-73.4607
50.75	-71.4942	-71.9539	-73.1823	-73.2646	-73.4998	-74.0877	-73.4073
50.8	-71.4836	-71.9683	-73.1357	-73.3286	-73.4959	-74.0995	-73.351
50.85	-71.4799	-71.979	-73.073	-73.4245	-73.4968	-74.1242	-73.299
50.9	-71.4894	-71.9852	-72.9993	-73.5195	-73.4876	-74.1634	-73.2618
50.95	-71.5167	-71.9891	-72.9206	-73.5891	-73.4588	-74.2126	-73.2463
51	-71.558	-71.9934	-72.8465	-73.6273	-73.4117	-74.2597	-73.2515
51.05	-71.6005	-71.999	-72.7902	-73.6447	-73.3598	-74.2901	-73.2693
51.1	-71.6284	-72.0047	-72.7632	-73.657	-73.3222	-74.2954	-73.2912
51.15	-71.6303	-72.0094	-72.7696	-73.6722	-73.3135	-74.278	-73.3145
51.2	-71.6044	-72.0134	-72.8032	-73.6857	-73.3368	-74.2492	-73.3438
51.25	-71.5576	-72.0176	-72.8485	-73.6855	-73.3843	-74.2228	-73.3856
51.3	-71.5037	-72.0209	-72.8862	-73.6635	-73.4426	-74.2075	-73.4415
51.35	-71.4597	-72.0187	-72.9024	-73.621	-73.4961	-74.2045	-73.5061
51.4	-71.4401	-72.006	-72.8943	-73.5675	-73.5285	-74.2085	-73.5707
51.45	-71.4499	-71.9828	-72.8695	-73.5142	-73.5249	-74.2128	-73.6287
51.5	-71.4805	-71.9577	-72.8401	-73.4682	-73.4804	-74.2133	-73.6779
51.55	-71.5119	-71.9426	-72.8162	-73.4285	-73.4084	-74.2105	-73.7171
51.6	-71.523	-71.9436	-72.803	-73.3881	-73.3388	-74.2088	-73.7422
51.65	-71.5035	-71.9587	-72.801	-73.3391	-73.3058	-74.2137	-73.7456
51.7	-71.4616	-71.9823	-72.8063	-73.2804	-73.3309	-74.2275	-73.7207
51.75	-71.4193	-72.0122	-72.8129	-73.2196	-73.4138	-74.244	-73.6688
51.8	-71.3993	-72.0509	-72.8151	-73.1675	-73.5341	-74.2482	-73.6021
51.85	-71.4128	-72.0999	-72.8104	-73.1305	-73.6607	-74.2227	-73.5396
51.9	-71.4551	-72.1568	-72.8011	-73.1066	-73.7647	-74.1576	-73.4967
51.95	-71.5118	-72.2155	-72.7951	-73.0874	-73.8276	-74.0581	-73.4774
52	-71.5657	-72.2682	-72.8019	-73.0635	-73.8459	-73.9425	-73.4724
52.05	-71.601	-72.3038	-72.8255	-73.029	-73.8288	-73.8367	-73.4661
52.1	-71.6077	-72.3076	-72.8567	-72.9843	-73.7932	-73.7648	-73.4463
52.15	-71.5847	-72.2655	-72.8765	-72.9366	-73.7561	-73.7429	-73.4123
52.2	-71.5426	-72.1725	-72.8683	-72.8985	-73.7281	-73.7735	-73.3748
52.25	-71.4984	-72.0411	-72.8312	-72.8839	-73.7099	-73.8456	-73.3493
52.3	-71.4651	-71.901	-72.7835	-72.9009	-73.6953	-73.9375	-73.3464
52.35	-71.4428	-71.7884	-72.7507	-72.9473	-73.6783	-74.0226	-73.3665
52.4	-71.4186	-71.7293	-72.7484	-73.0107	-73.6601	-74.077	-73.3999
52.45	-71.3773	-71.7253	-72.7717	-73.0739	-73.6486	-74.0859	-73.4315
52.5	-71.314	-71.7553	-72.7988	-73.1228	-73.6516	-74.0475	-73.447
52.55	-71.2405	-71.79	-72.807	-73.151	-73.6689	-73.9707	-73.4394
52.6	-71.181	-71.8104	-72.7874	-73.1601	-73.6909	-73.869	-73.4127
52.65	-71.1605	-71.814	-72.7462	-73.1584	-73.706	-73.7567	-73.3783
52.7	-71.1929	-71.8094	-72.6946	-73.1587	-73.7098	-73.6492	-73.3488
52.75	-71.275	-71.8029	-72.6399	-73.175	-73.7063	-73.5639	-73.3311
52.8	-71.3904	-71.7927	-72.5846	-73.2171	-73.7022	-73.5173	-73.3254
52.85	-71.519	-71.772	-72.5321	-73.285	-73.6999	-73.5178	-73.3281
52.9	-71.6449	-71.7384	-72.4903	-73.3665	-73.6986	-73.5598	-73.3356
52.95	-71.7591	-71.6994	-72.4676	-73.4438	-73.6981	-73.6228	-73.3468
53	-71.8566	-71.6669	-72.4675	-73.503	-73.7001	-73.6785	-73.3626
53.05	-71.9344	-71.6489	-72.4848	-73.5411	-73.7061	-73.7028	-73.3836
53.1	-71.9913	-71.6441	-72.5086	-73.5641	-73.7168	-73.6868	-73.4086
53.15	-72.0286	-71.6461	-72.5299	-73.5776	-73.7338	-73.639	-73.4351
53.2	-72.0478	-71.6501	-72.5459	-73.5805	-73.7605	-73.5786	-73.4607
53.25	-72.0468	-71.656	-72.559	-73.5665	-73.7984	-73.5242	-73.4832
53.3	-72.0196	-71.6663	-72.5722	-73.5307	-73.8414	-73.4862	-73.5005
53.35	-71.9608	-71.682	-72.5873	-73.4752	-73.8742	-73.4644	-73.5093
53.4	-71.8744	-71.6997	-72.6062	-73.4083	-73.8785	-73.4514	-73.5078
53.45	-71.7788	-71.7141	-72.6299	-73.3389	-73.844	-73.4402	-73.4978
53.5	-71.7025	-71.7231	-72.656	-73.2731	-73.7776	-73.4308	-73.4856
53.55	-71.6712	-71.7313	-72.6777	-73.215	-73.7032	-73.4312	-73.4789
53.6	-71.6953	-71.7472	-72.6893	-73.172	-73.6512	-73.4508	-73.481
53.65	-71.7664	-71.7757	-72.6926	-73.1561	-73.6428	-73.4915	-73.4872
53.7	-71.8619	-71.8132	-72.6982	-73.1799	-73.6806	-73.5441	-73.4866
53.75	-71.9526	-71.8492	-72.7195	-73.2475	-73.7483	-73.593	-73.4693
53.8	-72.0112	-71.8737	-72.7648	-73.3483	-73.8193	-73.625	-73.435
53.85	-72.0217	-71.8848	-72.834	-73.4591	-73.869	-73.6371	-73.3943
53.9	-71.9869	-71.8884	-72.9188	-73.5529	-73.8841	-73.6369	-73.3638
53.95	-71.93	-71.8913	-73.0075	-73.6092	-73.8652	-73.6366	-73.357
54	-71.8848	-71.8954	-73.0891	-73.6203	-73.8219	-73.6443	-73.3764
54.05	-71.8791	-71.8972	-73.1556	-73.5921	-73.7632	-73.659	-73.4127
54.1	-71.9178	-71.8936	-73.2027	-73.5412	-73.6928	-73.6717	-73.4488
54.15	-71.9799	-71.8862	-73.2282	-73.489	-73.6109	-73.6744	-73.4666
54.2	-72.029	-71.8812	-73.2327	-73.4558	-73.5195	-73.6667	-73.4558
54.25	-72.0344	-71.8863	-73.2198	-73.454	-73.4259	-73.6573	-73.4185
54.3	-71.9883	-71.9081	-73.1954	-73.4831	-73.3417	-73.6561	-73.3696
54.35	-71.9091	-71.9502	-73.1659	-73.5294	-73.2783	-73.6679	-73.331
54.4	-71.8283	-72.0106	-73.1359	-73.5713	-73.2428	-73.6915	-73.3215
54.45	-71.7728	-72.0787	-73.1075	-73.5883	-73.2335	-73.7257	-73.3482
54.5	-71.751	-72.1372	-73.0804	-73.5688	-73.2396	-73.7718	-73.4021
54.55	-71.7512	-72.1688	-73.0536	-73.5134	-73.2448	-73.829	-73.4629
54.6	-71.7513	-72.1654	-73.0273	-73.4345	-73.234	-73.8906	-73.5103
54.65	-71.7357	-72.1309	-73.0041	-73.3519	-73.2006	-73.9444	-73.5343
54.7	-71.7061	-72.0779	-72.9893	-73.2846	-73.15	-73.9797	-73.5393
54.75	-71.6798	-72.0212	-72.9878	-73.2416	-73.095	-73.992	-73.5394
54.8	-71.6743	-71.9716	-73.0004	-73.218	-73.0473	-73.9826	-73.5462
54.85	-71.6933	-71.9331	-73.0214	-73.2021	-73.0121	-73.9544	-73.5606
54.9	-71.7245	-71.9023	-73.0411	-73.188	-72.9898	-73.9096	-73.573
54.95	-71.75	-71.871	-73.0513	-73.1835	-72.981	-73.8509	-73.5735
55	-71.7584	-71.8321	-73.0494	-73.2047	-72.9874	-73.7836	-73.5618
55.05	-71.7489	-71.7871	-73.037	-73.2606	-73.0085	-73.7151	-73.5491
55.1	-71.726	-71.7474	-73.0179	-73.3409	-73.0387	-73.653	-73.5501
55.15	-71.6909	-71.729	-72.9958	-73.4165	-73.0696	-73.604	-73.5706
55.2	-71.6413	-71.7434	-72.9742	-73.4559	-73.0953	-73.5746	-73.6003
55.25	-71.5786	-71.7915	-72.955	-73.4437	-73.1147	-73.5692	-73.6174
55.3	-71.5135	-71.8643	-72.9389	-73.3877	-73.1307	-73.5876	-73.6041
55.35	-71.4615	-71.9479	-72.9253	-73.3109	-73.1477	-73.6232	-73.5623
55.4	-71.4316	-72.0294	-72.9129	-73.2367	-73.1687	-73.6661	-73.5133
55.45	-71.4196	-72.1003	-72.8983	-73.1788	-73.1937	-73.7092	-73.4812
55.5	-71.4147	-72.1584	-72.8754	-73.1403	-73.2207	-73.7515	-73.4736
55.55	-71.4103	-72.205	-72.8379	-73.1181	-73.2472	-73.7977	-73.4768
55.6	-71.408	-72.2414	-72.7849	-73.1086	-73.2747	-73.8521	-73.4699
55.65	-71.4121	-72.2664	-72.7243	-73.1084	-73.3087	-73.9104	-73.4412
55.7	-71.4236	-72.2764	-72.6705	-73.1133	-73.3556	-73.9552	-73.3978
55.75	-71.4403	-72.2665	-72.6381	-73.1164	-73.417	-73.9625	-73.3592
55.8	-71.4611	-72.2334	-72.6351	-73.1108	-73.4872	-73.9162	-73.3445
55.85	-71.4874	-72.1786	-72.6611	-73.0933	-73.5569	-73.8202	-73.3601
55.9	-71.5194	-72.1111	-72.7086	-73.0668	-73.6191	-73.6981	-73.3973
55.95	-71.5538	-72.0468	-72.7656	-73.0397	-73.6718	-73.5812	-73.4381
56	-71.585	-72.0035	-72.8158	-73.0243	-73.7167	-73.4967	-73.4656
56.05	-71.6097	-71.994	-72.8411	-73.0349	-73.7557	-73.4602	-73.472
56.1	-71.6286	-72.0224	-72.8289	-73.083	-73.7884	-73.4729	-73.4607
56.15	-71.6438	-72.083	-72.7807	-73.1704	-73.8116	-73.5203	-73.4414
56.2	-71.6552	-72.1613	-72.715	-73.2846	-73.8214	-73.5758	-73.4228
56.25	-71.6604	-72.2382	-72.6577	-73.4004	-73.8162	-73.6122	-73.4074
56.3	-71.6574	-72.2962	-72.6285	-73.4899	-73.7964	-73.6153	-73.394
56.35	-71.6474	-72.3246	-72.6312	-73.5322	-73.7627	-73.5905	-73.3825
56.4	-71.6361	-72.322	-72.6544	-73.5188	-73.7148	-73.5569	-73.3755
56.45	-71.6307	-72.2954	-72.6793	-73.4548	-73.6544	-73.5342	-73.3746
56.5	-71.6354	-72.2569	-72.6915	-73.3567	-73.5879	-73.5299	-73.3754
56.55	-71.6484	-72.2199	-72.6892	-73.2484	-73.5273	-73.5352	-73.3657
56.6	-71.6628	-72.1934	-72.6836	-73.1549	-73.4876	-73.532	-73.3313
56.65	-71.6723	-72.1787	-72.6895	-73.0952	-73.4822	-73.5065	-73.2659
56.7	-71.6753	-72.1691	-72.7135	-73.0769	-73.5189	-73.46	-73.179
56.75	-71.6753	-72.1521	-72.7474	-73.0976	-73.5954	-73.4089	-73.0938
56.8	-71.6782	-72.1157	-72.7718	-73.1469	-73.6973	-73.373	-73.0351
56.85	-71.6878	-72.0547	-72.7666	-73.2103	-73.8018	-73.3621	-73.0163
56.9	-71.7046	-71.9754	-72.7231	-73.2725	-73.8856	-73.3717	-73.0355
56.95	-71.7276	-71.8937	-72.6501	-73.3203	-73.9329	-73.3909	-73.0816
57	-71.756	-71.8265	-72.5719	-73.3455	-73.9392	-73.4144	-73.1409
57.05	-71.7885	-71.7826	-72.5184	-73.3467	-73.912	-73.4453	-73.2008
57.1	-71.8213	-71.759	-72.514	-73.3286	-73.8681	-73.4878	-73.2502
57.15	-71.8501	-71.7448	-72.5677	-73.301	-73.8271	-73.5378	-73.2809
57.2	-71.8739	-71.7301	-72.6701	-73.2759	-73.803	-73.5841	-73.2892
57.25	-71.8986	-71.7136	-72.7967	-73.2635	-73.7982	-73.6167	-73.2767
57.3	-71.9329	-71.7033	-72.917	-73.2704	-73.8033	-73.6327	-73.2495
57.35	-71.981	-71.7099	-73.0066	-73.2982	-73.8027	-73.6352	-73.2166
57.4	-72.0363	-71.7358	-73.0576	-73.3435	-73.7812	-73.6278	-73.1879
57.45	-72.084	-71.7709	-73.0792	-73.3961	-73.7312	-73.6137	-73.1723
57.5	-72.1096	-71.7986	-73.0898	-73.4402	-73.6572	-73.5974	-73.1753
57.55	-72.1073	-71.8077	-73.102	-73.4607	-73.5753	-73.5863	-73.1977
57.6	-72.0821	-71.8	-73.1146	-73.4536	-73.5074	-73.5888	-73.2367
57.65	-72.045	-71.7872	-73.1148	-73.4295	-73.4723	-73.6104	-73.2888
57.7	-72.0045	-71.7799	-73.09	-73.407	-73.4779	-73.6504	-73.3518
57.75	-71.9633	-71.779	-73.039	-73.3997	-73.5167	-73.7018	-73.4251
57.8	-71.9207	-71.7786	-72.9731	-73.4079	-73.5686	-73.7523	-73.508
57.85	-71.8784	-71.7762	-72.9084	-73.4205	-73.6092	-73.7865	-73.5977
57.9	-71.8405	-71.7787	-72.8571	-73.4263	-73.6205	-73.7897	-73.6898
57.95	-71.8103	-71.7979	-72.8228	-73.4231	-73.5992	-73.7527	-73.7785
58	-71.7883	-71.8391	-72.803	-73.4184	-73.556	-73.677	-73.857
58.05	-71.7753	-71.8953	-72.7941	-73.4207	-73.508	-73.5773	-73.9179
58.1	-71.7762	-71.9505	-72.7934	-73.4311	-73.4696	-73.4785	-73.9527
58.15	-71.7973	-71.9891	-72.7985	-73.4432	-73.4472	-73.4081	-73.955
58.2	-71.8398	-72.003	-72.8065	-73.4476	-73.4396	-73.3859	-73.9257
58.25	-71.8938	-71.9947	-72.8161	-73.4366	-73.4416	-73.4169	-73.8762
58.3	-71.9405	-71.9758	-72.8318	-73.4063	-73.4468	-73.4902	-73.8259
58.35	-71.9613	-71.9626	-72.8625	-73.358	-73.4499	-73.585	-73.7925
58.4	-71.9482	-71.969	-72.9173	-73.3018	-73.449	-73.6788	-73.7827
58.45	-71.9068	-71.9986	-72.9992	-73.2549	-73.4474	-73.7537	-73.7918
58.5	-71.85	-72.0421	-73.1027	-73.2331	-73.4531	-73.8013	-73.8109
58.55	-71.7888	-72.0845	-73.2169	-73.2397	-73.4736	-73.8247	-73.8338
58.6	-71.7284	-72.1142	-73.33	-73.2628	-73.5102	-73.8355	-73.8576
58.65	-71.6698	-72.1275	-73.4336	-73.2821	-73.5565	-73.8459	-73.8795
58.7	-71.6133	-72.1249	-73.5218	-73.2827	-73.6024	-73.8607	-73.8941
58.75	-71.558	-72.1078	-73.5886	-73.2652	-73.6408	-73.8781	-73.8949
58.8	-71.5024	-72.079	-73.6249	-73.2442	-73.6709	-73.8959	-73.8792
58.85	-71.446	-72.0458	-73.6195	-73.237	-73.6959	-73.9167	-73.8503
58.9	-71.3903	-72.017	-73.5649	-73.2496	-73.7179	-73.9463	-73.8158
58.95	-71.3377	-71.9981	-73.4634	-73.2709	-73.735	-73.9878	-73.7822
59	-71.2885	-71.9891	-73.3308	-73.2783	-73.7424	-74.0387	-73.7512
59.05	-71.2422	-71.9898	-73.1948	-73.2505	-73.737	-74.0906	-73.7204
59.1	-71.2011	-72.0029	-73.0867	-73.1803	-73.7199	-74.1331	-73.6879
59.15	-71.1729	-72.0326	-73.0299	-73.0786	-73.6959	-74.1582	-73.656
59.2	-71.1685	-72.0777	-73.0309	-72.9691	-73.6715	-74.1635	-73.6301
59.25	-71.195	-72.1294	-73.0777	-72.878	-73.6519	-74.1516	-73.6148
59.3	-71.2513	-72.175	-73.1467	-72.8248	-73.6393	-74.1282	-73.611
59.35	-71.3274	-72.2069	-73.2113	-72.8182	-73.6327	-74.0995	-73.6132
59.4	-71.41	-72.2264	-73.2497	-72.8568	-73.6292	-74.0706	-73.6114
59.45	-71.4878	-72.2399	-73.2496	-72.9309	-73.6271	-74.0453	-73.5935
59.5	-71.5544	-72.2511	-73.2114	-73.0249	-73.627	-74.0256	-73.5507
59.55	-71.6068	-72.257	-73.1451	-73.1219	-73.6293	-74.0095	-73.4814
59.6	-71.6445	-72.2519	-73.0652	-73.2088	-73.6321	-73.9903	-73.3937
59.65	-71.668	-72.2326	-72.9856	-73.2792	-73.6319	-73.9575	-73.3039
59.7	-71.6767	-72.2009	-72.9151	-73.3327	-73.628	-73.9022	-73.2328
59.75	-71.6675	-72.1616	-72.8564	-73.3708	-73.625	-73.8231	-73.198
59.8	-71.6378	-72.1203	-72.8068	-73.3944	-73.6305	-73.7292	-73.2059
59.85	-71.5911	-72.0812	-72.7614	-73.404	-73.648	-73.6352	-73.2485
59.9	-71.5397	-72.0462	-72.7171	-73.4025	-73.6739	-73.5534	-73.3081
59.95	-71.5008	-72.0139	-72.6737	-73.3964	-73.6994	-73.4886	-73.3637
60	-71.4865	-71.9817	-72.6344	-73.3952	-73.7174	-73.4398	-73.3977
60.05	-71.4987	-71.9475	-72.6063	-73.4082	-73.7257	-73.4059	-73.3976
60.1	-71.5308	-71.9113	-72.6007	-73.4408	-73.7257	-73.389	-73.3572
60.15	-71.5733	-71.875	-72.6279	-73.4909	-73.7187	-73.3926	-73.2776
60.2	-71.6162	-71.8438	-72.6907	-73.5478	-73.7047	-73.4161	-73.1675
60.25	-71.6489	-71.8268	-72.7792	-73.5959	-73.6849	-73.4529	-73.0442
60.3	-71.6616	-71.834	-72.8726	-73.6224	-73.6639	-73.4933	-72.9328
60.35	-71.6521	-71.8697	-72.9467	-73.6245	-73.6472	-73.5326	-72.8602
60.4	-71.6308	-71.9258	-72.9845	-73.6112	-73.6366	-73.5732	-72.8447
60.45	-71.6181	-71.9829	-72.9841	-73.5977	-73.625	-73.6193	-72.8882
60.5	-71.6337	-72.0175	-72.9583	-73.5971	-73.599	-73.6693	-72.9747
60.55	-71.6847	-72.0142	-72.9243	-73.6152	-73.5489	-73.7137	-73.0765
60.6	-71.7612	-71.975	-72.8914	-73.6488	-73.4803	-73.7414	-73.166
60.65	-71.8409	-71.9206	-72.8579	-73.6908	-73.4174	-73.7457	-73.2261
60.7	-71.9013	-71.8805	-72.8191	-73.7355	-73.3916	-73.7257	-73.2566
60.75	-71.9325	-71.8785	-72.7778	-73.7816	-73.4223	-73.6846	-73.2702
60.8	-71.9421	-71.9206	-72.7462	-73.8286	-73.5044	-73.627	-73.2824
60.85	-71.951	-71.9941	-72.7383	-73.8724	-73.6125	-73.5589	-73.2995
60.9	-71.9827	-72.0762	-72.7589	-73.9049	-73.7149	-73.4892	-73.3142
60.95	-72.0521	-72.1485	-72.7991	-73.9182	-73.7877	-73.43	-73.3127
61	-72.1576	-72.2054	-72.8429	-73.9113	-73.8192	-73.3943	-73.2868
61.05	-72.2803	-72.2526	-72.8775	-73.8895	-73.808	-73.3905	-73.2419
61.1	-72.39	-72.2956	-72.8988	-73.861	-73.7601	-73.4164	-73.1966
61.15	-72.4563	-72.3299	-72.9091	-73.8308	-73.6898	-73.4587	-73.1728
61.2	-72.4597	-72.3405	-72.9124	-73.7981	-73.6174	-73.4999	-73.1838
61.25	-72.3973	-72.314	-72.9122	-73.7591	-73.5621	-73.5273	-73.2273
61.3	-72.2827	-72.2528	-72.9134	-73.7113	-73.5329	-73.5386	-73.2864
61.35	-72.1403	-72.1774	-72.9221	-73.6571	-73.5246	-73.5407	-73.3386
61.4	-71.997	-72.1143	-72.941	-73.6026	-73.5227	-73.5439	-73.3691
61.45	-71.8744	-72.0781	-72.9656	-73.5538	-73.5111	-73.5578	-73.3801
61.5	-71.7843	-72.0642	-72.9857	-73.5142	-73.4771	-73.5893	-73.3879
61.55	-71.7303	-72.0559	-72.9934	-73.4839	-73.4132	-73.6417	-73.4129
61.6	-71.7119	-72.0387	-72.9906	-73.4605	-73.3212	-73.7122	-73.4673
61.65	-71.7256	-72.0103	-72.9866	-73.4402	-73.216	-73.7914	-73.5495
61.7	-71.7632	-71.9801	-72.9897	-73.4214	-73.1235	-73.8644	-73.6477
61.75	-71.8104	-71.9628	-73.0016	-73.4072	-73.0701	-73.9153	-73.7459
61.8	-71.8491	-71.9707	-73.0194	-73.4056	-73.0698	-73.9331	-73.8264
61.85	-71.8637	-72.0088	-73.0409	-73.4249	-73.1185	-73.9174	-73.8722
61.9	-71.8469	-72.0742	-73.0654	-73.4702	-73.1969	-73.8804	-73.8708
61.95	-71.8021	-72.1572	-73.0908	-73.5407	-73.279	-73.8419	-73.822
62	-71.742	-72.2446	-73.1126	-73.6273	-73.3399	-73.8183	-73.7425
62.05	-71.6834	-72.3221	-73.1279	-73.712	-73.3607	-73.8137	-73.6584
62.1	-71.6404	-72.3786	-73.139	-73.77	-73.3335	-73.8193	-73.5911
62.15	-71.6206	-72.4112	-73.1524	-73.7787	-73.2647	-73.8217	-73.5465
62.2	-71.6248	-72.4256	-73.1738	-73.7262	-73.176	-73.8141	-73.5175
62.25	-71.6478	-72.4321	-73.2017	-73.6165	-73.0979	-73.8019	-73.4949
62.3	-71.6804	-72.4385	-73.2249	-73.4688	-73.0574	-73.7966	-73.4763
62.35	-71.7107	-72.4465	-73.2273	-73.3115	-73.0668	-73.8042	-73.4653
62.4	-71.7275	-72.4515	-73.1986	-73.1736	-73.1222	-73.8185	-73.464
62.45	-71.7263	-72.4469	-73.1428	-73.0762	-73.2108	-73.8261	-73.4692
62.5	-71.7127	-72.4276	-73.0775	-73.0293	-73.319	-73.8175	-73.474
62.55	-71.6991	-72.3938	-73.0223	-73.0318	-73.4334	-73.7942	-73.4726
62.6	-71.696	-72.3518	-72.9889	-73.0711	-73.5396	-73.7632	-73.4636
62.65	-71.7021	-72.3117	-72.9781	-73.1245	-73.6223	-73.729	-73.4497
62.7	-71.7055	-72.282	-72.9847	-73.1645	-73.6714	-73.6918	-73.4373
62.75	-71.6942	-72.2647	-73.004	-73.1707	-73.6881	-73.6537	-73.4339
62.8	-71.6673	-72.2549	-73.0333	-73.1406	-73.6855	-73.6237	-73.4459
62.85	-71.6361	-72.2444	-73.0683	-73.0905	-73.6821	-73.6146	-73.4743
62.9	-71.6154	-72.2267	-73.0998	-73.0458	-73.6931	-73.6318	-73.5117
62.95	-71.6131	-72.2011	-73.1148	-73.0266	-73.7245	-73.6669	-73.5452
63	-71.6269	-72.1709	-73.1038	-73.0388	-73.7729	-73.7022	-73.5643
63.05	-71.6486	-72.1392	-73.0674	-73.0738	-73.8283	-73.7243	-73.5687
63.1	-71.6694	-72.1057	-73.0162	-73.1147	-73.8773	-73.7341	-73.5662
63.15	-71.6853	-72.0679	-72.964	-73.1449	-73.9059	-73.7438	-73.5644
63.2	-71.6972	-72.0253	-72.9224	-73.1536	-73.9039	-73.7655	-73.5641
63.25	-71.7088	-71.9814	-72.8966	-73.1416	-73.8727	-73.8022	-73.5601
63.3	-71.7232	-71.9428	-72.8845	-73.1202	-73.8284	-73.8485	-73.5473
63.35	-71.7422	-71.9144	-72.8772	-73.1044	-73.797	-73.8952	-73.5243
63.4	-71.7671	-71.8982	-72.8645	-73.1022	-73.7997	-73.9317	-73.4956
63.45	-71.8	-71.8942	-72.8417	-73.1099	-73.8409	-73.9467	-73.4687
63.5	-71.8415	-71.9035	-72.8143	-73.1199	-73.907	-73.9327	-73.45
63.55	-71.8892	-71.9296	-72.7935	-73.1313	-73.9755	-73.8902	-73.4401
63.6	-71.9378	-71.9761	-72.7868	-73.1537	-74.0267	-73.8291	-73.4331
63.65	-71.9839	-72.04	-72.7909	-73.1961	-74.0489	-73.764	-73.4194
63.7	-72.0291	-72.1071	-72.7941	-73.2552	-74.04	-73.7082	-73.3902
63.75	-72.0764	-72.1544	-72.7861	-73.3131	-74.0062	-73.6697	-73.3415
63.8	-72.122	-72.1617	-72.7667	-73.3499	-73.9592	-73.6484	-73.277
63.85	-72.1522	-72.1216	-72.7457	-73.3602	-73.9105	-73.6372	-73.2071
63.9	-72.1522	-72.0433	-72.7345	-73.3566	-73.8656	-73.6282	-73.1444
63.95	-72.1202	-71.9453	-72.7393	-73.3575	-73.8242	-73.6209	-73.0965
64	-72.0724	-71.8457	-72.76	-73.3706	-73.7844	-73.6229	-73.0631
64.05	-72.0351	-71.7545	-72.7934	-73.3887	-73.7468	-73.6413	-73.0374
64.1	-72.0278	-71.6743	-72.8338	-73.3998	-73.7137	-73.6729	-73.0114
64.15	-72.0524	-71.6082	-72.8732	-73.4008	-73.6883	-73.704	-72.9814
64.2	-72.0939	-71.5664	-72.902	-73.4011	-73.6742	-73.7189	-72.9517
64.25	-72.1309	-71.5639	-72.913	-73.413	-73.6755	-73.71	-72.9334
64.3	-72.1471	-71.6104	-72.9058	-73.4409	-73.6938	-73.6825	-72.9385
64.35	-72.1387	-71.7015	-72.8878	-73.4785	-73.7249	-73.6512	-72.9729
64.4	-72.1143	-71.819	-72.8722	-73.5171	-73.7584	-73.6317	-73.0324
64.45	-72.0897	-71.9373	-72.8716	-73.5547	-73.783	-73.6313	-73.1045
64.5	-72.0795	-72.0307	-72.8895	-73.5954	-73.7929	-73.6462	-73.1733
64.55	-72.0918	-72.0809	-72.9172	-73.6405	-73.792	-73.6654	-73.2243
64.6	-72.1248	-72.0809	-72.9383	-73.6799	-73.7916	-73.678	-73.2485
64.65	-72.1683	-72.0383	-72.9402	-73.6945	-73.803	-73.6784	-73.2442
64.7	-72.2093	-71.974	-72.9233	-73.668	-73.8296	-73.6669	-73.2153
64.75	-72.2374	-71.9155	-72.9014	-73.5998	-73.8653	-73.6467	-73.1705
64.8	-72.2487	-71.8863	-72.8939	-73.509	-73.8978	-73.6227	-73.1219
64.85	-72.2444	-71.8953	-72.9129	-73.4274	-73.9142	-73.5997	-73.0844
64.9	-72.2253	-71.9332	-72.9539	-73.3838	-73.9036	-73.581	-73.071
64.95	-72.1872	-71.9793	-72.9965	-73.3902	-73.8582	-73.5675	-73.0879
65	-72.1219	-72.0137	-73.0148	-73.4372	-73.7756	-73.5585	-73.1315
65.05	-72.0251	-72.027	-72.9935	-73.501	-73.6609	-73.5557	-73.1894
65.1	-71.9026	-72.0232	-72.9374	-73.556	-73.5283	-73.564	-73.2441
65.15	-71.7702	-72.0137	-72.8685	-73.584	-73.3994	-73.5887	-73.2797
65.2	-71.6455	-72.007	-72.8132	-73.5776	-73.2982	-73.6297	-73.2878
65.25	-71.5399	-72.0028	-72.7889	-73.543	-73.2431	-73.6795	-73.2696
65.3	-71.4571	-71.9927	-72.7993	-73.4983	-73.2387	-73.7277	-73.2346
65.35	-71.3992	-71.9679	-72.8372	-73.4667	-73.2714	-73.7674	-73.1969
65.4	-71.3704	-71.927	-72.8908	-73.4639	-73.3152	-73.7968	-73.1712
65.45	-71.3767	-71.8797	-72.948	-73.4897	-73.3412	-73.8179	-73.17
65.5	-71.4202	-71.8429	-72.9991	-73.5287	-73.3286	-73.8367	-73.2004
65.55	-71.4945	-71.8326	-73.0395	-73.5602	-73.2723	-73.862	-73.2617
65.6	-71.5844	-71.8558	-73.071	-73.5681	-73.1861	-73.9031	-73.3439
65.65	-71.6707	-71.9055	-73.0995	-73.548	-73.0988	-73.9613	-73.4309
65.7	-71.7371	-71.9634	-73.1299	-73.5062	-73.0424	-74.0245	-73.5078
65.75	-71.7764	-72.0079	-73.1631	-73.4552	-73.0354	-74.0697	-73.567
65.8	-71.7908	-72.0241	-73.1973	-73.4078	-73.0731	-74.0781	-73.6078
65.85	-71.7879	-72.0103	-73.231	-73.3738	-73.1287	-74.0506	-73.631
65.9	-71.7756	-71.9779	-73.2645	-73.3584	-73.1687	-74.0111	-73.6349
65.95	-71.7586	-71.9445	-73.2978	-73.3613	-73.1709	-73.9931	-73.6174
66	-71.7373	-71.9238	-73.3281	-73.376	-73.1374	-74.0181	-73.5803
66.05	-71.7103	-71.9195	-73.3498	-73.3929	-73.0935	-74.0833	-73.5298
66.1	-71.6781	-71.9276	-73.3562	-73.4052	-73.0743	-74.1651	-73.4728
66.15	-71.6459	-71.9418	-73.3425	-73.4143	-73.1044	-74.233	-73.415
66.2	-71.6211	-71.9592	-73.307	-73.4275	-73.1851	-74.2619	-73.3624
66.25	-71.6076	-71.9793	-73.251	-73.4513	-73.2943	-74.2401	-73.3223
66.3	-71.6032	-72.0008	-73.1782	-73.486	-73.4013	-74.1706	-73.3006
66.35	-71.6028	-72.0184	-73.0937	-73.5247	-73.4836	-74.0703	-73.298
66.4	-71.6036	-72.0236	-73.003	-73.5575	-73.5364	-73.9633	-73.31
66.45	-71.6065	-72.0088	-72.9104	-73.5758	-73.5688	-73.8711	-73.3311
66.5	-71.6134	-71.9734	-72.8188	-73.5757	-73.592	-73.805	-73.3583
66.55	-71.6263	-71.9282	-72.7326	-73.5589	-73.6115	-73.7632	-73.3921
66.6	-71.648	-71.8935	-72.6598	-73.5307	-73.6271	-73.7345	-73.4335
66.65	-71.6836	-71.8909	-72.6111	-73.4976	-73.6384	-73.7074	-73.48
66.7	-71.738	-71.9314	-72.5956	-73.4641	-73.648	-73.6784	-73.5237
66.75	-71.8107	-72.0069	-72.6188	-73.4313	-73.6597	-73.6544	-73.5543
66.8	-71.8923	-72.091	-72.6815	-73.3998	-73.6737	-73.6469	-73.5637
66.85	-71.9672	-72.1507	-72.7798	-73.3725	-73.6834	-73.6641	-73.55
66.9	-72.0199	-72.1631	-72.9046	-73.3554	-73.6792	-73.7043	-73.518
66.95	-72.0416	-72.1263	-73.0405	-73.3522	-73.6538	-73.7582	-73.4765
67	-72.0316	-72.0578	-73.1677	-73.3582	-73.6074	-73.8147	-73.4366
67.05	-71.995	-71.9825	-73.2636	-73.3608	-73.5488	-73.8669	-73.4073
67.1	-71.9405	-71.9192	-73.3087	-73.3483	-73.4916	-73.9124	-73.3939
67.15	-71.8801	-71.8737	-73.2915	-73.3215	-73.4481	-73.949	-73.3964
67.2	-71.8271	-71.8411	-73.2133	-73.2969	-73.4242	-73.9705	-73.4096
67.25	-71.7923	-71.8124	-73.0865	-73.2975	-73.4188	-73.9699	-73.4225
67.3	-71.7795	-71.7833	-72.9309	-73.3396	-73.4257	-73.9451	-73.4211
67.35	-71.7853	-71.7571	-72.7697	-73.4231	-73.4366	-73.9025	-73.3935
67.4	-71.8034	-71.74	-72.6286	-73.5318	-73.4434	-73.8555	-73.3392
67.45	-71.83	-71.7356	-72.5321	-73.6424	-73.4403	-73.8179	-73.272
67.5	-71.8659	-71.7425	-72.4979	-73.7328	-73.4257	-73.7977	-73.2129
67.55	-71.9146	-71.7574	-72.53	-73.7878	-73.4021	-73.7934	-73.1778
67.6	-71.9798	-71.7756	-72.6153	-73.8006	-73.374	-73.7961	-73.1695
67.65	-72.0626	-71.7905	-72.7253	-73.7729	-73.3471	-73.7968	-73.1779
67.7	-72.159	-71.7914	-72.8252	-73.7138	-73.3283	-73.7925	-73.1886
67.75	-72.2577	-71.7673	-72.8864	-73.6373	-73.3242	-73.7862	-73.1917
67.8	-72.3428	-71.7146	-72.8973	-73.5565	-73.3374	-73.7807	-73.1876
67.85	-72.4005	-71.6443	-72.8674	-73.4794	-73.3637	-73.774	-73.1851
67.9	-72.4273	-71.5803	-72.8201	-73.4092	-73.3959	-73.7603	-73.195
67.95	-72.4298	-71.5459	-72.7807	-73.3483	-73.4279	-73.735	-73.2228
68	-72.4187	-71.5509	-72.7646	-73.3025	-73.4574	-73.699	-73.2651
68.05	-72.4011	-71.5867	-72.7732	-73.2797	-73.4842	-73.6601	-73.3116
68.1	-72.3785	-71.6343	-72.7976	-73.2845	-73.5089	-73.6297	-73.3512
68.15	-72.3495	-71.6745	-72.8252	-73.3145	-73.533	-73.6167	-73.378
68.2	-72.3154	-71.6935	-72.8465	-73.3618	-73.5581	-73.6215	-73.3917
68.25	-72.2829	-71.6833	-72.8557	-73.4173	-73.5845	-73.6354	-73.3942
68.3	-72.2624	-71.6425	-72.849	-73.4729	-73.6108	-73.6457	-73.3869
68.35	-72.2622	-71.5783	-72.8228	-73.52	-73.6349	-73.6439	-73.373
68.4	-72.281	-71.5059	-72.7779	-73.5496	-73.6554	-73.6297	-73.3609
68.45	-72.3049	-71.4434	-72.7242	-73.5568	-73.6723	-73.6106	-73.3647
68.5	-72.3141	-71.4075	-72.6811	-73.5449	-73.6859	-73.5989	-73.3963
68.55	-72.2928	-71.4095	-72.6683	-73.526	-73.6951	-73.6058	-73.4551
68.6	-72.2382	-71.4548	-72.6936	-73.5171	-73.6953	-73.6382	-73.5245
68.65	-72.1615	-71.5415	-72.7478	-73.5345	-73.6781	-73.6954	-73.5803
68.7	-72.0813	-71.6606	-72.8125	-73.5882	-73.6348	-73.7705	-73.6056
68.75	-72.0141	-71.7967	-72.8717	-73.6777	-73.5645	-73.8525	-73.5996
68.8	-71.9674	-71.9311	-72.9181	-73.7893	-73.4776	-73.9293	-73.5742
68.85	-71.9383	-72.0442	-72.9513	-73.8985	-73.3948	-73.9896	-73.5448
68.9	-71.9157	-72.1189	-72.9716	-73.979	-73.3381	-74.0253	-73.5233
68.95	-71.8858	-72.1446	-72.9788	-74.0126	-73.3207	-74.0338	-73.5173
69	-71.8392	-72.122	-72.9733	-73.9967	-73.3397	-74.0199	-73.5299
69.05	-71.7757	-72.0657	-72.9598	-73.9429	-73.3761	-73.9947	-73.5577
69.1	-71.7027	-71.9984	-72.9471	-73.8696	-73.4042	-73.971	-73.5894
69.15	-71.6295	-71.9406	-72.9436	-73.7935	-73.405	-73.9574	-73.6105
69.2	-71.5631	-71.9017	-72.9509	-73.7251	-73.375	-73.9543	-73.6113
69.25	-71.5104	-71.8805	-72.9627	-73.6691	-73.3243	-73.9555	-73.5931
69.3	-71.4813	-71.8737	-72.972	-73.6265	-73.2683	-73.9535	-73.5667
69.35	-71.4879	-71.8826	-72.9793	-73.5963	-73.2202	-73.9464	-73.5467
69.4	-71.5365	-71.912	-72.9934	-73.5748	-73.1867	-73.9398	-73.5436
69.45	-71.6225	-71.963	-73.0241	-73.5544	-73.1697	-73.9418	-73.5596
69.5	-71.7311	-72.0264	-73.0739	-73.5234	-73.1676	-73.9549	-73.5871
69.55	-71.843	-72.0861	-73.1367	-73.4694	-73.1768	-73.9714	-73.6128
69.6	-71.9416	-72.1268	-73.203	-73.3873	-73.1933	-73.9779	-73.6247
69.65	-72.0161	-72.1437	-73.2648	-73.2841	-73.2151	-73.9656	-73.6192
69.7	-72.0624	-72.1433	-73.3191	-73.1783	-73.2447	-73.9375	-73.6045
69.75	-72.0811	-72.1358	-73.3671	-73.0916	-73.2868	-73.9088	-73.5953
69.8	-72.0736	-72.1276	-73.4116	-73.0402	-73.3431	-73.9003	-73.602
69.85	-72.0424	-72.1194	-73.4539	-73.0313	-73.4084	-73.9276	-73.6239
69.9	-71.9924	-72.11	-73.492	-73.0641	-73.4723	-73.9902	-73.6514
69.95	-71.9347	-72.0988	-73.5203	-73.1315	-73.5261	-74.0705	-73.6732
70	-71.8854	-72.0839	-73.5309	-73.2224	-73.5668	-74.1419	-73.6841
70.05	-71.8587	-72.0606	-73.5181	-73.323	-73.5957	-74.1843	-73.6857
70.1	-71.8594	-72.0224	-73.4833	-73.4195	-73.6143	-74.1941	-73.6839
70.15	-71.8789	-71.9673	-73.4354	-73.4992	-73.6218	-74.1827	-73.6833
70.2	-71.8996	-71.9016	-73.3866	-73.5535	-73.6148	-74.1653	-73.6829
70.25	-71.9019	-71.8403	-73.3468	-73.5795	-73.5903	-74.1487	-73.6757
70.3	-71.8725	-71.8006	-73.3227	-73.5794	-73.5471	-74.1264	-73.6527
70.35	-71.8079	-71.7937	-73.3179	-73.5566	-73.4864	-74.0848	-73.6108
70.4	-71.7157	-71.8181	-73.3323	-73.5123	-73.4139	-74.0157	-73.556
70.45	-71.6146	-71.8615	-73.3593	-73.4448	-73.3416	-73.9262	-73.5003
70.5	-71.5302	-71.9062	-73.3881	-73.354	-73.2863	-73.8386	-73.4549
70.55	-71.4867	-71.9366	-73.4086	-73.2486	-73.2658	-73.7798	-73.4239
70.6	-71.4978	-71.9439	-73.4157	-73.1488	-73.2926	-73.7669	-73.4037
70.65	-71.559	-71.9289	-73.4089	-73.0822	-73.3699	-73.7966	-73.3866
70.7	-71.6496	-71.9004	-73.3904	-73.0717	-73.4905	-73.8464	-73.3656
70.75	-71.7407	-71.8691	-73.3622	-73.1247	-73.6357	-73.8867	-73.3379
70.8	-71.8078	-71.8416	-73.3247	-73.2278	-73.7775	-73.8976	-73.3065
70.85	-71.8408	-71.8177	-73.2749	-73.3501	-73.8862	-73.8788	-73.2799
70.9	-71.8461	-71.7929	-73.2088	-73.4529	-73.9411	-73.8445	-73.2703
70.95	-71.8401	-71.7626	-73.1258	-73.5036	-73.9396	-73.8113	-73.2874
71	-71.8396	-71.7254	-73.0326	-73.4904	-73.8969	-73.7898	-73.3311
71.05	-71.8533	-71.6826	-72.9414	-73.4307	-73.8382	-73.7833	-73.3878
71.1	-71.8797	-71.6367	-72.8648	-73.3658	-73.7869	-73.7919	-73.4358
71.15	-71.9104	-71.5887	-72.811	-73.3404	-73.7566	-73.812	-73.4559
71.2	-71.9374	-71.5381	-72.7817	-73.3801	-73.7478	-73.8359	-73.44
71.25	-71.9577	-71.4852	-72.7732	-73.4778	-73.7523	-73.8535	-73.3925
71.3	-71.9729	-71.4331	-72.7792	-73.5989	-73.7598	-73.8586	-73.3268
71.35	-71.9857	-71.3875	-72.793	-73.6998	-73.7641	-73.8528	-73.261
71.4	-71.9971	-71.3543	-72.8081	-73.7489	-73.7646	-73.8439	-73.2122
71.45	-72.0078	-71.3377	-72.8181	-73.7385	-73.7652	-73.8398	-73.1888
71.5	-72.0205	-71.3387	-72.8182	-73.6843	-73.7719	-73.8416	-73.1873
71.55	-72.0397	-71.3547	-72.8076	-73.616	-73.7912	-73.8442	-73.1949
71.6	-72.0679	-71.3807	-72.7909	-73.562	-73.8274	-73.8415	-73.198
71.65	-72.1023	-71.4119	-72.7762	-73.5364	-73.8824	-73.8317	-73.1911
71.7	-72.135	-71.4462	-72.7712	-73.536	-73.9526	-73.8171	-73.1785
71.75	-72.1595	-71.4836	-72.7797	-73.5497	-74.0265	-73.8001	-73.1704
71.8	-72.177	-71.5233	-72.8017	-73.5703	-74.0846	-73.7815	-73.1753
71.85	-72.1953	-71.5626	-72.8343	-73.599	-74.1072	-73.7641	-73.1946
71.9	-72.2193	-71.5975	-72.8721	-73.6394	-74.085	-73.7547	-73.2217
71.95	-72.2432	-71.6233	-72.906	-73.6901	-74.0261	-73.7619	-73.2473
72	-72.2534	-71.6349	-72.9242	-73.7444	-73.9513	-73.7895	-73.2656
72.05	-72.2374	-71.6278	-72.9175	-73.7964	-73.8822	-73.831	-73.2773
72.1	-72.1938	-71.6007	-72.8863	-73.8457	-73.8311	-73.8701	-73.2868
72.15	-72.1327	-71.5575	-72.8423	-73.8969	-73.7985	-73.8879	-73.2967
72.2	-72.0701	-71.5066	-72.8042	-73.9547	-73.7781	-73.8743	-73.3059
72.25	-72.0189	-71.458	-72.7894	-74.0177	-73.7642	-73.8347	-73.3126
72.3	-71.9832	-71.4225	-72.8081	-74.0766	-73.7549	-73.7883	-73.3193
72.35	-71.9573	-71.4105	-72.8617	-74.1189	-73.7508	-73.7564	-73.3331
72.4	-71.9315	-71.4305	-72.9452	-74.1355	-73.7504	-73.7492	-73.3607
72.45	-71.8997	-71.4849	-73.049	-74.1265	-73.7471	-73.7607	-73.4012
72.5	-71.8642	-71.5673	-73.1598	-74.0991	-73.7309	-73.7743	-73.4444
72.55	-71.8323	-71.6629	-73.2597	-74.0624	-73.6918	-73.7745	-73.4762
72.6	-71.8102	-71.7537	-73.3296	-74.0231	-73.6235	-73.757	-73.4869
72.65	-71.7962	-71.8245	-73.3557	-73.9844	-73.5264	-73.7306	-73.4766
72.7	-71.7819	-71.8673	-73.337	-73.948	-73.4102	-73.7133	-73.454
72.75	-71.7578	-71.8826	-73.2862	-73.9125	-73.294	-73.7242	-73.432
72.8	-71.719	-71.878	-73.2249	-73.8725	-73.2032	-73.7748	-73.4222
72.85	-71.6673	-71.8646	-73.1741	-73.8205	-73.1619	-73.8621	-73.4317
72.9	-71.6082	-71.8518	-73.1476	-73.7531	-73.1846	-73.9682	-73.4601
72.95	-71.5475	-71.8448	-73.1481	-73.6768	-73.2701	-74.0671	-73.4985
73	-71.49	-71.8436	-73.168	-73.6075	-73.4008	-74.1346	-73.5325
73.05	-71.4383	-71.8447	-73.1928	-73.5627	-73.5485	-74.1557	-73.5485
73.1	-71.3918	-71.8445	-73.2084	-73.5533	-73.6835	-74.1276	-73.5396
73.15	-71.3463	-71.8409	-73.2081	-73.5808	-73.7829	-74.0587	-73.5069
73.2	-71.2963	-71.835	-73.196	-73.637	-73.8336	-73.9668	-73.4573
73.25	-71.2369	-71.828	-73.183	-73.7044	-73.8325	-73.8744	-73.4026
73.3	-71.1659	-71.8186	-73.1782	-73.7602	-73.7851	-73.8043	-73.3592
73.35	-71.0846	-71.8027	-73.1804	-73.7856	-73.7058	-73.7736	-73.3442
73.4	-70.9995	-71.7775	-73.1781	-73.7762	-73.6155	-73.7886	-73.3684
73.45	-70.9213	-71.7455	-73.1581	-73.7427	-73.5377	-73.8424	-73.4287
73.5	-70.8598	-71.7139	-73.1171	-73.7004	-73.4921	-73.9179	-73.5078
73.55	-70.8173	-71.6893	-73.0662	-73.6584	-73.4893	-73.9961	-73.5811
73.6	-70.7872	-71.6729	-73.0248	-73.6172	-73.528	-74.063	-73.6268
73.65	-70.7597	-71.6598	-73.0104	-73.5741	-73.5958	-74.1113	-73.6333
73.7	-70.7296	-71.6436	-73.0298	-73.5301	-73.6723	-74.1383	-73.6006
73.75	-70.699	-71.622	-73.0775	-73.4904	-73.7353	-74.1441	-73.5361
73.8	-70.6743	-71.5999	-73.1397	-73.4597	-73.7694	-74.1326	-73.4517
73.85	-70.659	-71.5858	-73.201	-73.4371	-73.7727	-74.1116	-73.3612
73.9	-70.6499	-71.5842	-73.251	-73.4173	-73.7583	-74.0901	-73.2805
73.95	-70.6368	-71.5897	-73.2866	-73.3963	-73.7462	-74.0749	-73.2241
74	-70.6092	-71.5891	-73.3103	-73.3783	-73.7516	-74.0672	-73.203
74.05	-70.5642	-71.5717	-73.3264	-73.3735	-73.7779	-74.0619	-73.2227
74.1	-70.5099	-71.5367	-73.3365	-73.3897	-73.8187	-74.049	-73.2829
74.15	-70.4617	-71.4928	-73.338	-73.4231	-73.8643	-74.0199	-73.3761
74.2	-70.4331	-71.4503	-73.3263	-73.4568	-73.9067	-73.9738	-73.4856
74.25	-70.4276	-71.4147	-73.2992	-73.4697	-73.9406	-73.9196	-73.5892
74.3	-70.4361	-71.3853	-73.2585	-73.4483	-73.9615	-73.8721	-73.6676
74.35	-70.4423	-71.3607	-73.2086	-73.3944	-73.9664	-73.8442	-73.7132
74.4	-70.4306	-71.3424	-73.154	-73.3244	-73.9553	-73.8414	-73.7335
74.45	-70.3926	-71.3332	-73.0986	-73.2617	-73.9308	-73.8597	-73.7457
74.5	-70.3281	-71.3314	-73.0468	-73.2263	-73.8948	-73.8899	-73.7649
74.55	-70.2436	-71.3276	-73.002	-73.2264	-73.8457	-73.9243	-73.7954
74.6	-70.1489	-71.3128	-72.9633	-73.2561	-73.7824	-73.961	-73.829
74.65	-70.0553	-71.2899	-72.9242	-73.3015	-73.7111	-74.0003	-73.853
74.7	-69.9737	-71.2762	-72.8762	-73.3495	-73.6493	-74.0378	-73.8578
74.75	-69.9123	-71.2926	-72.8157	-73.3938	-73.62	-74.0609	-73.8405
74.8	-69.8736	-71.3474	-72.7478	-73.4345	-73.6398	-74.0541	-73.8021
74.85	-69.8528	-71.431	-72.6845	-73.4754	-73.7075	-74.0064	-73.7442
74.9	-69.8417	-71.5215	-72.6386	-73.5218	-73.8035	-73.9185	-73.6673
74.95	-69.8333	-71.5963	-72.6164	-73.5791	-73.9011	-73.8027	-73.5709
75	-69.8244	-71.64	-72.6142	-73.6495	-73.9815	-73.6801	-73.4542
75.05	-69.8121	-71.6481	-72.6216	-73.7269	-74.0396	-73.5732	-73.3197
75.1	-69.7895	-71.627	-72.6313	-73.7971	-74.0784	-73.4989	-73.1785
75.15	-69.7471	-71.5903	-72.6453	-73.8463	-74.0998	-73.4628	-73.0516
75.2	-69.6792	-71.5517	-72.6733	-73.8697	-74.1019	-73.4583	-72.9621
75.25	-69.5881	-71.518	-72.7232	-73.8735	-74.0847	-73.4697	-72.9229
75.3	-69.4821	-71.4883	-72.7918	-73.867	-74.0548	-73.4773	-72.9277
75.35	-69.3693	-71.4594	-72.8634	-73.8529	-74.0236	-73.465	-72.9543
75.4	-69.2544	-71.4308	-72.9176	-73.8254	-74.0005	-73.4268	-72.9776
75.45	-69.1414	-71.4055	-72.9407	-73.7786	-73.988	-73.3704	-72.9842
75.5	-69.0378	-71.3859	-72.9316	-73.7181	-73.9827	-73.3143	-72.9784
75.55	-68.9538	-71.3707	-72.8988	-73.6635	-73.9796	-73.2783	-72.9754
75.6	-68.8967	-71.354	-72.8529	-73.6393	-73.9765	-73.2722	-72.9899
75.65	-68.8645	-71.3282	-72.8025	-73.6605	-73.973	-73.29	-73.0277
75.7	-68.8469	-71.287	-72.7543	-73.7242	-73.9689	-73.3134	-73.0865
75.75	-68.8334	-71.2279	-72.718	-73.8126	-73.9632	-73.3241	-73.1601
75.8	-68.8215	-71.1522	-72.7057	-73.9013	-73.9556	-73.3149	-73.2412
75.85	-68.8159	-71.0655	-72.7269	-73.9671	-73.9477	-73.2916	-73.3215
75.9	-68.8206	-70.9779	-72.7816	-73.9907	-73.9405	-73.2669	-73.3909
75.95	-68.8323	-70.9035	-72.8583	-73.9599	-73.9325	-73.2524	-73.4408
76	-68.8403	-70.8569	-72.9393	-73.8741	-73.918	-73.2544	-73.4686
76.05	-68.8354	-70.8462	-73.0087	-73.7468	-73.8902	-73.2745	-73.4796
76.1	-68.8165	-70.8652	-73.0566	-73.6038	-73.8442	-73.3119	-73.4843
76.15	-68.7907	-70.8937	-73.0781	-73.474	-73.7809	-73.3654	-73.4902
76.2	-68.7658	-70.9045	-73.0701	-73.3801	-73.7097	-73.4312	-73.4962
76.25	-68.7425	-70.875	-73.0314	-73.3336	-73.6467	-73.5017	-73.4944
76.3	-68.714	-70.7963	-72.9675	-73.3335	-73.6085	-73.5675	-73.4767
76.35	-68.6724	-70.6759	-72.8944	-73.3687	-73.6059	-73.6232	-73.4417
76.4	-68.6155	-70.534	-72.8375	-73.4199	-73.6414	-73.673	-73.3955
76.45	-68.5466	-70.3952	-72.8216	-73.4658	-73.7109	-73.7286	-73.3486
76.5	-68.4694	-70.2815	-72.8573	-73.4914	-73.8029	-73.7999	-73.3122
76.55	-68.3838	-70.2064	-72.9343	-73.4946	-73.8976	-73.8877	-73.2957
76.6	-68.2875	-70.1731	-73.0263	-73.4862	-73.9701	-73.9828	-73.306
76.65	-68.1815	-70.1753	-73.105	-73.481	-74.0014	-74.0729	-73.3454
76.7	-68.0754	-70.2016	-73.1527	-73.4888	-73.989	-74.1501	-73.4106
76.75	-67.9841	-70.2395	-73.1675	-73.5099	-73.947	-74.2121	-73.4923
76.8	-67.9197	-70.2775	-73.1608	-73.5372	-73.897	-74.2595	-73.5771
76.85	-67.8843	-70.3053	-73.1524	-73.5624	-73.8563	-74.2924	-73.6497
76.9	-67.8691	-70.3138	-73.1621	-73.5815	-73.8302	-74.3091	-73.6949
76.95	-67.8617	-70.2964	-73.2008	-73.595	-73.8125	-74.3068	-73.7004
77	-67.8539	-70.2493	-73.2626	-73.6051	-73.791	-74.2812	-73.6625
77.05	-67.8451	-70.1718	-73.3248	-73.612	-73.7561	-74.2284	-73.5892
77.1	-67.8407	-70.0683	-73.3586	-73.6144	-73.7068	-74.1486	-73.5001
77.15	-67.848	-69.9522	-73.3451	-73.6116	-73.6535	-74.0502	-73.4189
77.2	-67.8711	-69.8451	-73.286	-73.6046	-73.6159	-73.951	-73.3653
77.25	-67.9076	-69.7689	-73.2011	-73.5949	-73.6146	-73.8744	-73.348
77.3	-67.947	-69.7328	-73.1151	-73.5832	-73.6584	-73.8408	-73.3636
77.35	-67.9722	-69.727	-73.0444	-73.5691	-73.7354	-73.8589	-73.3992
77.4	-67.9639	-69.7267	-72.9937	-73.5531	-73.8165	-73.9207	-73.439
77.45	-67.9065	-69.7054	-72.9614	-73.5355	-73.8703	-74.0032	-73.4726
77.5	-67.7939	-69.6488	-72.9464	-73.5149	-73.8803	-74.078	-73.499
77.55	-67.6341	-69.5606	-72.948	-73.4856	-73.8505	-74.1221	-73.5251
77.6	-67.4488	-69.4562	-72.9609	-73.439	-73.7969	-74.1261	-73.5587
77.65	-67.2669	-69.3494	-72.9708	-73.3689	-73.7347	-74.0954	-73.6
77.7	-67.1143	-69.2427	-72.9584	-73.2801	-73.6731	-74.0463	-73.6392
77.75	-67.005	-69.1296	-72.909	-73.1906	-73.6187	-73.9999	-73.6617
77.8	-66.9394	-69.0078	-72.8229	-73.1234	-73.581	-73.9753	-73.6577
77.85	-66.9084	-68.8885	-72.7174	-73.0938	-73.5698	-73.9838	-73.6301
77.9	-66.901	-68.7922	-72.6173	-73.1003	-73.588	-74.0249	-73.5928
77.95	-66.9101	-68.7349	-72.5418	-73.1282	-73.6287	-74.0864	-73.5624
78	-66.9334	-68.7155	-72.4971	-73.1589	-73.6807	-74.1479	-73.5489
78.05	-66.9729	-68.7136	-72.4788	-73.1782	-73.7351	-74.1868	-73.5508
78.1	-67.0305	-68.6992	-72.475	-73.1805	-73.7864	-74.1865	-73.5565
78.15	-67.1041	-68.6488	-72.4682	-73.1684	-73.8281	-74.1429	-73.5517
78.2	-67.1835	-68.5581	-72.4383	-73.151	-73.8498	-74.0677	-73.5267
78.25	-67.2506	-68.4439	-72.3718	-73.1428	-73.8425	-73.9853	-73.4818
78.3	-67.2839	-68.3331	-72.2718	-73.1601	-73.8089	-73.9249	-73.4252
78.35	-67.2654	-68.2477	-72.1585	-73.2142	-73.7684	-73.9073	-73.3662
78.4	-67.1887	-68.1961	-72.0583	-73.3043	-73.7493	-73.934	-73.3099
78.45	-67.0644	-68.1741	-71.9888	-73.4134	-73.7714	-73.9846	-73.2585
78.5	-66.9211	-68.1712	-71.9492	-73.5135	-73.8331	-74.0283	-73.2152
78.55	-66.7971	-68.1769	-71.9228	-73.5765	-73.9133	-74.0406	-73.1866
78.6	-66.7239	-68.1829	-71.8872	-73.5857	-73.9835	-74.0162	-73.1802
78.65	-66.7122	-68.1828	-71.8254	-73.5422	-74.0204	-73.968	-73.1993
78.7	-66.7486	-68.1716	-71.7324	-73.4615	-74.011	-73.9173	-73.2396
78.75	-66.8046	-68.1473	-71.6156	-73.3649	-73.9538	-73.8805	-73.2872
78.8	-66.8505	-68.1111	-71.4909	-73.2714	-73.8596	-73.862	-73.325
78.85	-66.8665	-68.0658	-71.3759	-73.1955	-73.7497	-73.8545	-73.3421
78.9	-66.8484	-68.0136	-71.2856	-73.1508	-73.6501	-73.8487	-73.3409
78.95	-66.8071	-67.9566	-71.2298	-73.151	-73.583	-73.8408	-73.3348
79	-66.763	-67.8997	-71.2141	-73.2053	-73.5606	-73.833	-73.3376
79.05	-66.7363	-67.8538	-71.2379	-73.3091	-73.5826	-73.8255	-73.3527
79.1	-66.7385	-67.8325	-71.2906	-73.4387	-73.6391	-73.8111	-73.3691
79.15	-66.7679	-67.8442	-71.3501	-73.556	-73.7151	-73.779	-73.3679
79.2	-66.8117	-67.8851	-71.3879	-73.6241	-73.7955	-73.7259	-73.3347
79.25	-66.8513	-67.938	-71.3817	-73.6257	-73.8671	-73.6622	-73.271
79.3	-66.8701	-67.9798	-71.3262	-73.5715	-73.9191	-73.6082	-73.1969
79.35	-66.86	-67.9924	-71.2347	-73.4948	-73.9441	-73.5833	-73.1428
79.4	-66.8254	-67.9718	-71.1302	-73.434	-73.9402	-73.5971	-73.1352
79.45	-66.7794	-67.9274	-71.0331	-73.4148	-73.9124	-73.6481	-73.1832
79.5	-66.7358	-67.8756	-70.9539	-73.4401	-73.8721	-73.7266	-73.2743
79.55	-66.7009	-67.829	-70.8941	-73.4912	-73.8327	-73.8171	-73.3809
79.6	-66.6719	-67.791	-70.8513	-73.5385	-73.8055	-73.901	-73.4736
79.65	-66.644	-67.7557	-70.822	-73.5573	-73.7967	-73.9609	-73.5333
79.7	-66.6181	-67.7122	-70.8004	-73.54	-73.8064	-73.989	-73.5542
79.75	-66.6031	-67.6499	-70.7765	-73.5003	-73.8313	-73.9928	-73.5424
79.8	-66.6087	-67.5631	-70.7392	-73.4644	-73.8681	-73.9902	-73.5108
79.85	-66.6363	-67.4537	-70.6824	-73.4575	-73.9151	-73.9971	-73.4739
79.9	-66.6769	-67.3311	-70.6094	-73.4891	-73.9691	-74.0168	-73.4435
79.95	-66.7167	-67.2094	-70.532	-73.5471	-74.0227	-74.0405	-73.426
80	-66.7458	-67.101	-70.4641	-73.6039	-74.0623	-74.0553	-73.4212
80.05	-66.7617	-67.0118	-70.4134	-73.6318	-74.0727	-74.0527	-73.4232
80.1	-66.7676	-66.9409	-70.3787	-73.6189	-74.0459	-74.0319	-73.4223
80.15	-66.7671	-66.8834	-70.3538	-73.5722	-73.9873	-73.9994	-73.409
80.2	-66.7623	-66.8341	-70.3348	-73.5084	-73.9162	-73.9695	-73.3803
80.25	-66.7539	-66.7905	-70.3233	-73.4404	-73.8565	-73.9607	-73.3442
80.3	-66.7444	-66.7556	-70.3232	-73.3706	-73.8247	-73.9863	-73.3168
80.35	-66.7387	-66.7362	-70.3344	-73.2957	-73.8223	-74.0439	-73.3111
80.4	-66.7415	-66.7385	-70.3502	-73.2152	-73.8373	-74.1128	-73.3277
80.45	-66.7518	-66.7628	-70.3609	-73.1361	-73.8501	-74.1655	-73.3545
80.5	-66.762	-66.8031	-70.3597	-73.0678	-73.8427	-74.1828	-73.3774
80.55	-66.7616	-66.8507	-70.3456	-73.0133	-73.8064	-74.1633	-73.3918
80.6	-66.7428	-66.8975	-70.3207	-72.9649	-73.7456	-74.1213	-73.4035
80.65	-66.7022	-66.9385	-70.2844	-72.9101	-73.6754	-74.079	-73.4193
80.7	-66.6412	-66.9709	-70.2302	-72.8427	-73.6146	-74.0544	-73.4378
80.75	-66.5683	-66.9923	-70.1491	-72.7669	-73.5759	-74.0538	-73.4504
80.8	-66.4996	-66.999	-70.037	-72.6919	-73.5597	-74.0707	-73.4499
80.85	-66.4555	-66.9879	-69.901	-72.6226	-73.5532	-74.0932	-73.4378
80.9	-66.4515	-66.9599	-69.7595	-72.5583	-73.5361	-74.1125	-73.4238
80.95	-66.4924	-66.922	-69.6375	-72.4962	-73.494	-74.1255	-73.4204
81	-66.5702	-66.8831	-69.5561	-72.4358	-73.4292	-74.1326	-73.4386
81.05	-66.6696	-66.8489	-69.5221	-72.3774	-73.3643	-74.1337	-73.484
81.1	-66.7742	-66.8192	-69.5237	-72.3195	-73.331	-74.1282	-73.5548
81.15	-66.8722	-66.7882	-69.5357	-72.2579	-73.3532	-74.1158	-73.6415
81.2	-66.96	-66.7478	-69.5321	-72.1882	-73.4339	-74.0968	-73.7287
81.25	-67.0401	-66.6898	-69.4987	-72.1098	-73.555	-74.0717	-73.8
81.3	-67.1172	-66.6102	-69.4365	-72.0273	-73.6877	-74.0409	-73.8423
81.35	-67.192	-66.5118	-69.3569	-71.9493	-73.8057	-74.0058	-73.8506
81.4	-67.2609	-66.4043	-69.2733	-71.8848	-73.8934	-73.9693	-73.8298
81.45	-67.3202	-66.3009	-69.1922	-71.8395	-73.9466	-73.9354	-73.7917
81.5	-67.3709	-66.2123	-69.1104	-71.8132	-73.9694	-73.9081	-73.7488
81.55	-67.4198	-66.1439	-69.0202	-71.8008	-73.9704	-73.8904	-73.7096
81.6	-67.4748	-66.0945	-68.9196	-71.7962	-73.9584	-73.8835	-73.6776
81.65	-67.5376	-66.057	-68.8184	-71.7961	-73.9394	-73.8867	-73.6545
81.7	-67.5989	-66.0218	-68.7355	-71.7976	-73.9139	-73.898	-73.6422
81.75	-67.6435	-65.9795	-68.687	-71.7944	-73.8787	-73.9134	-73.6424
81.8	-67.6607	-65.9264	-68.6764	-71.7757	-73.8314	-73.9269	-73.654
81.85	-67.6553	-65.8687	-68.6923	-71.7334	-73.7769	-73.932	-73.6692
81.9	-67.6479	-65.8237	-68.7139	-71.6693	-73.729	-73.9243	-73.6735
81.95	-67.6634	-65.8131	-68.7194	-71.5954	-73.7042	-73.9037	-73.6509
82	-67.716	-65.848	-68.694	-71.5269	-73.7112	-73.8755	-73.5931
82.05	-67.8031	-65.917	-68.633	-71.4738	-73.7436	-73.8502	-73.5055
82.1	-67.9086	-65.989	-68.5434	-71.4374	-73.7847	-73.8391	-73.4054
82.15	-68.0135	-66.0308	-68.4398	-71.4115	-73.8182	-73.8489	-73.3162
82.2	-68.105	-66.0268	-68.3384	-71.3872	-73.8358	-73.8771	-73.257
82.25	-68.1804	-65.988	-68.2486	-71.3558	-73.8364	-73.9121	-73.2361
82.3	-68.2461	-65.9432	-68.1689	-71.3105	-73.822	-73.9378	-73.2485
82.35	-68.3115	-65.9207	-68.0901	-71.2459	-73.7969	-73.9392	-73.2809
82.4	-68.3834	-65.9325	-68.0046	-71.1577	-73.7687	-73.9068	-73.3209
82.45	-68.4633	-65.9714	-67.914	-71.0476	-73.7464	-73.842	-73.3605
82.5	-68.5483	-66.0203	-67.8297	-70.928	-73.7359	-73.7616	-73.3964
82.55	-68.6341	-66.0646	-67.7662	-70.822	-73.7342	-73.6948	-73.4272
82.6	-68.7177	-66.0982	-67.7336	-70.752	-73.7313	-73.6703	-73.4528
82.65	-68.7975	-66.1221	-67.7312	-70.7257	-73.7171	-73.7014	-73.4725
82.7	-68.8719	-66.1388	-67.7461	-70.7288	-73.6893	-73.7767	-73.4828
82.75	-68.9367	-66.1497	-67.758	-70.7337	-73.6549	-73.8646	-73.4762
82.8	-68.985	-66.1565	-67.7491	-70.7168	-73.623	-73.9275	-73.4453
82.85	-69.0087	-66.1629	-67.7118	-70.6724	-73.5969	-73.9381	-73.3881
82.9	-69.0006	-66.1731	-67.6504	-70.6123	-73.5723	-73.8895	-73.3124
82.95	-68.9557	-66.1882	-67.5784	-70.553	-73.5433	-73.7961	-73.2334
83	-68.8741	-66.2041	-67.5138	-70.5038	-73.5092	-73.6847	-73.1679
83.05	-68.7658	-66.2171	-67.4763	-70.4632	-73.4751	-73.5822	-73.1255
83.1	-68.6515	-66.231	-67.4811	-70.4252	-73.4448	-73.5052	-73.1039
83.15	-68.5568	-66.2576	-67.5317	-70.3859	-73.4138	-73.4575	-73.09
83.2	-68.5012	-66.3094	-67.6146	-70.3461	-73.3675	-73.4331	-73.068
83.25	-68.4921	-66.3896	-67.7036	-70.3085	-73.2896	-73.424	-73.0282
83.3	-68.5266	-66.4894	-67.7715	-70.2749	-73.1752	-73.4247	-72.9724
83.35	-68.5964	-66.5942	-67.8044	-70.2453	-73.0376	-73.434	-72.9134
83.4	-68.6902	-66.6899	-67.8063	-70.2179	-72.9023	-73.4532	-72.8678
83.45	-68.795	-66.7675	-67.7931	-70.1876	-72.7913	-73.4834	-72.8479
83.5	-68.8973	-66.8227	-67.7815	-70.1456	-72.711	-73.5254	-72.8556
83.55	-68.987	-66.8546	-67.7788	-70.083	-72.6522	-73.5802	-72.8824
83.6	-69.0605	-66.8657	-67.7825	-69.998	-72.5998	-73.648	-72.9157
83.65	-69.1224	-66.8621	-67.784	-69.9005	-72.5437	-73.7253	-72.9458
83.7	-69.1839	-66.8544	-67.7749	-69.8073	-72.4799	-73.803	-72.9709
83.75	-69.2588	-66.8574	-67.7498	-69.7321	-72.4073	-73.8693	-72.9959
83.8	-69.3577	-66.8864	-67.7074	-69.678	-72.3245	-73.9168	-73.0287
83.85	-69.4825	-66.9502	-67.65	-69.6378	-72.2322	-73.9479	-73.0749
83.9	-69.6233	-67.0441	-67.5846	-69.6008	-72.1381	-73.9728	-73.1354
83.95	-69.7605	-67.1492	-67.5219	-69.5602	-72.0548	-74.0023	-73.2069
84	-69.8726	-67.2414	-67.4744	-69.516	-71.9903	-74.0408	-73.2842
84.05	-69.946	-67.3028	-67.4528	-69.4733	-71.9411	-74.0851	-73.3626
84.1	-69.9827	-67.3289	-67.4625	-69.4371	-71.8959	-74.1267	-73.4386
84.15	-69.999	-67.3285	-67.5023	-69.4078	-71.8456	-74.1563	-73.5081
84.2	-70.0171	-67.3176	-67.5648	-69.3799	-71.7917	-74.1674	-73.5649
84.25	-70.0559	-67.3132	-67.6385	-69.3459	-71.7425	-74.1579	-73.6021
84.3	-70.1225	-67.3287	-67.7094	-69.3008	-71.7048	-74.1307	-73.617
84.35	-70.2104	-67.3702	-67.764	-69.2447	-71.6771	-74.0923	-73.613
84.4	-70.3032	-67.4353	-67.7908	-69.1824	-71.6509	-74.0518	-73.5965
84.45	-70.3843	-67.5139	-67.7854	-69.1214	-71.6164	-74.0181	-73.5717
84.5	-70.4462	-67.5914	-67.7536	-69.0697	-71.5704	-73.997	-73.5395
84.55	-70.4935	-67.653	-67.7123	-69.0316	-71.5178	-73.988	-73.5001
84.6	-70.5374	-67.6891	-67.6818	-69.0052	-71.468	-73.9856	-73.4576
84.65	-70.5879	-67.6991	-67.6768	-68.9827	-71.4276	-73.9826	-73.4207
84.7	-70.6497	-67.6917	-67.6998	-68.9545	-71.3965	-73.9722	-73.3998
84.75	-70.7223	-67.6806	-67.741	-68.9144	-71.3714	-73.9501	-73.4035
84.8	-70.8012	-67.6771	-67.7824	-68.8639	-71.3488	-73.9141	-73.4351
84.85	-70.8786	-67.6858	-67.8043	-68.8093	-71.3264	-73.8655	-73.4922
84.9	-70.9446	-67.7062	-67.7923	-68.7557	-71.2991	-73.8093	-73.5676
84.95	-70.9923	-67.7358	-67.744	-68.701	-71.2595	-73.7529	-73.6503
85	-71.0251	-67.7718	-67.67	-68.6382	-71.203	-73.7053	-73.7281
85.05	-71.0589	-67.8119	-67.5895	-68.5622	-71.1336	-73.675	-73.7891
85.1	-71.113	-67.8556	-67.5226	-68.4747	-71.0632	-73.668	-73.8241
85.15	-71.1961	-67.9064	-67.4823	-68.3843	-71.0036	-73.686	-73.8288
85.2	-71.2982	-67.9713	-67.4683	-68.302	-70.9569	-73.7258	-73.8064
85.25	-71.3978	-68.0569	-67.4654	-68.2376	-70.9136	-73.7793	-73.7673
85.3	-71.4785	-68.1653	-67.4503	-68.1966	-70.8576	-73.8347	-73.7293
85.35	-71.5436	-68.2909	-67.406	-68.1787	-70.7766	-73.8799	-73.7129
85.4	-71.6145	-68.4205	-67.3348	-68.1782	-70.6701	-73.9061	-73.7335
85.45	-71.7148	-68.5376	-67.2608	-68.1859	-70.5527	-73.91	-73.7929
85.5	-71.8505	-68.6285	-67.2191	-68.1909	-70.4484	-73.8892	-73.8753
85.55	-72.0032	-68.688	-67.2382	-68.1831	-70.3802	-73.8378	-73.9526
85.6	-72.1414	-68.7204	-67.3229	-68.1569	-70.3573	-73.7474	-73.9968
85.65	-72.242	-68.7365	-67.4505	-68.113	-70.3695	-73.6159	-73.994
85.7	-72.304	-68.7491	-67.5832	-68.0592	-70.3916	-73.4548	-73.951
85.75	-72.345	-68.7677	-67.69	-68.0081	-70.3966	-73.2885	-73.891
85.8	-72.3851	-68.7962	-67.7612	-67.9746	-70.3714	-73.1441	-73.8394
85.85	-72.4327	-68.8342	-67.8076	-67.9718	-70.3232	-73.0412	-73.8082
85.9	-72.4827	-68.8813	-67.8478	-68.0063	-70.2721	-72.9861	-73.7911
85.95	-72.5256	-68.9388	-67.8951	-68.0754	-70.2363	-72.974	-73.7714
86	-72.5572	-69.0088	-67.9516	-68.1658	-70.2204	-72.9926	-73.7364
86.05	-72.5802	-69.091	-68.0109	-68.2585	-70.2161	-73.0253	-73.6864
86.1	-72.6002	-69.1823	-68.0645	-68.336	-70.2111	-73.053	-73.6341
86.15	-72.6233	-69.2778	-68.1066	-68.3895	-70.1968	-73.0561	-73.5928
86.2	-72.6579	-69.3738	-68.1346	-68.4215	-70.1707	-73.0189	-73.5656
86.25	-72.7138	-69.4699	-68.1475	-68.4421	-70.1338	-72.9345	-73.5439
86.3	-72.7962	-69.5686	-68.1454	-68.4607	-70.0886	-72.8087	-73.5179
86.35	-72.8981	-69.6717	-68.1305	-68.4793	-70.0373	-72.6585	-73.4877
86.4	-73.0024	-69.7767	-68.1089	-68.4901	-69.9798	-72.5082	-73.4646
86.45	-73.0933	-69.8762	-68.0888	-68.4803	-69.9121	-72.3796	-73.4613
86.5	-73.1652	-69.9612	-68.077	-68.4408	-69.8285	-72.2836	-73.481
86.55	-73.2225	-70.0246	-68.0774	-68.3734	-69.7286	-72.2152	-73.5159
86.6	-73.2718	-70.064	-68.0934	-68.2903	-69.6226	-72.1598	-73.553
86.65	-73.3169	-70.0809	-68.1311	-68.2068	-69.5298	-72.1047	-73.5791
86.7	-73.3592	-70.08	-68.1968	-68.1343	-69.4676	-72.049	-73.5833
86.75	-73.3991	-70.0674	-68.2906	-68.0771	-69.4393	-72.0036	-73.5567
86.8	-73.4361	-70.0515	-68.4034	-68.0362	-69.4316	-71.9814	-73.4946
86.85	-73.4687	-70.0438	-68.5209	-68.0134	-69.4239	-71.9863	-73.3997
86.9	-73.496	-70.0584	-68.631	-68.0129	-69.4014	-72.006	-73.2849
86.95	-73.5198	-70.1079	-68.7273	-68.0395	-69.3614	-72.0158	-73.1723
87	-73.5419	-70.1983	-68.8075	-68.0927	-69.3092	-71.9913	-73.0853
87.05	-73.5608	-70.324	-68.8714	-68.1628	-69.2522	-71.923	-73.0386
87.1	-73.5713	-70.4684	-68.9209	-68.2331	-69.1965	-71.8227	-73.0314
87.15	-73.5687	-70.609	-68.958	-68.2865	-69.1474	-71.7165	-73.05
87.2	-73.5564	-70.727	-68.9837	-68.3146	-69.1092	-71.628	-73.0758
87.25	-73.546	-70.8139	-68.9989	-68.3197	-69.0841	-71.5659	-73.0971
87.3	-73.5519	-70.8717	-69.0082	-68.3098	-69.0699	-71.5227	-73.115
87.35	-73.5814	-70.9085	-69.0207	-68.292	-69.0581	-71.485	-73.1396
87.4	-73.6312	-70.9332	-69.0453	-68.2684	-69.0353	-71.4464	-73.1778
87.45	-73.6911	-70.9533	-69.0859	-68.2379	-68.9899	-71.4113	-73.2239
87.5	-73.7504	-70.9744	-69.1412	-68.2015	-68.9201	-71.3885	-73.2604
87.55	-73.8011	-71.0005	-69.2088	-68.1663	-68.8377	-71.3798	-73.2688
87.6	-73.8381	-71.035	-69.2874	-68.1428	-68.7635	-71.3744	-73.2425
87.65	-73.8584	-71.0803	-69.374	-68.1388	-68.7167	-71.3541	-73.1911
87.7	-73.8638	-71.1373	-69.4621	-68.1528	-68.705	-71.3056	-73.1373
87.75	-73.8642	-71.2046	-69.5419	-68.1758	-68.7191	-71.2296	-73.1048
87.8	-73.8765	-71.2785	-69.6061	-68.1973	-68.7368	-71.1415	-73.1067
87.85	-73.9167	-71.3529	-69.6548	-68.2129	-68.733	-71.0608	-73.1398
87.9	-73.9894	-71.4201	-69.6962	-68.2262	-68.691	-71.0003	-73.1885
87.95	-74.0831	-71.4742	-69.7423	-68.2458	-68.6086	-70.9617	-73.2359
88	-74.1756	-71.5153	-69.8014	-68.2794	-68.4955	-70.9401	-73.2715
88.05	-74.2451	-71.5525	-69.8733	-68.3266	-68.3668	-70.9298	-73.2914
88.1	-74.281	-71.5991	-69.9492	-68.3758	-68.2368	-70.9264	-73.2923
88.15	-74.2877	-71.6635	-70.0166	-68.4092	-68.1169	-70.9255	-73.2676
88.2	-74.2814	-71.7427	-70.0649	-68.4132	-68.0152	-70.9226	-73.2114
88.25	-74.2812	-71.825	-70.0896	-68.3878	-67.937	-70.9142	-73.1264
88.3	-74.3019	-71.899	-70.0942	-68.3482	-67.8844	-70.8994	-73.0274
88.35	-74.3492	-71.9609	-70.0872	-68.3184	-67.8549	-70.8805	-72.9345
88.4	-74.4209	-72.0153	-70.0786	-68.319	-67.8427	-70.8612	-72.8614
88.45	-74.5088	-72.069	-70.0767	-68.3561	-67.8424	-70.8446	-72.808
88.5	-74.6004	-72.125	-70.0865	-68.4176	-67.8537	-70.8312	-72.7615
88.55	-74.6815	-72.1807	-70.1103	-68.4808	-67.8816	-70.8179	-72.7043
88.6	-74.7405	-72.2328	-70.1494	-68.5275	-67.9317	-70.7988	-72.6234
88.65	-74.774	-72.2815	-70.2075	-68.555	-68.0029	-70.7671	-72.5183
88.7	-74.7902	-72.3299	-70.2901	-68.5729	-68.0848	-70.7179	-72.4023
88.75	-74.8054	-72.378	-70.3978	-68.5925	-68.1599	-70.6505	-72.2952
88.8	-74.8349	-72.4206	-70.5201	-68.6161	-68.211	-70.5701	-72.2134
88.85	-74.8827	-72.4514	-70.6362	-68.6361	-68.2291	-70.487	-72.1623
88.9	-74.9387	-72.469	-70.7257	-68.6432	-68.2179	-70.412	-72.1368
88.95	-74.9851	-72.4801	-70.7784	-68.6351	-68.1922	-70.3492	-72.1265
89	-75.0074	-72.4959	-70.7968	-68.6196	-68.1699	-70.294	-72.1198
89.05	-75.0021	-72.5279	-70.7907	-68.6093	-68.1617	-70.2344	-72.1084
89.1	-74.9766	-72.5826	-70.7712	-68.6158	-68.1659	-70.1585	-72.088
89.15	-74.9439	-72.6593	-70.7497	-68.6466	-68.1706	-70.0596	-72.0584
89.2	-74.9158	-72.7484	-70.7383	-68.7052	-68.1635	-69.9398	-72.0208
89.25	-74.8991	-72.8362	-70.7506	-68.7896	-68.1421	-69.8084	-71.9761
89.3	-74.8954	-72.9111	-70.7974	-68.8895	-68.1155	-69.6795	-71.9251
89.35	-74.9032	-72.9694	-70.8802	-68.9876	-68.0978	-69.5671	-71.8694
89.4	-74.9183	-73.0139	-70.9882	-69.0671	-68.0976	-69.4814	-71.8118
89.45	-74.9327	-73.0515	-71.1013	-69.1204	-68.1123	-69.4258	-71.7548
89.5	-74.9354	-73.0903	-71.201	-69.1521	-68.13	-69.3961	-71.6993
89.55	-74.9173	-73.1396	-71.2783	-69.1736	-68.1368	-69.383	-71.6462
89.6	-74.8784	-73.2077	-71.3376	-69.1968	-68.1232	-69.3752	-71.5977
89.65	-74.8294	-73.2975	-71.3915	-69.231	-68.0862	-69.362	-71.558
89.7	-74.7871	-73.4037	-71.4525	-69.2815	-68.0289	-69.3347	-71.5279
89.75	-74.7659	-73.5144	-71.5238	-69.3495	-67.9598	-69.2907	-71.5003
89.8	-74.7719	-73.6163	-71.5989	-69.4315	-67.8938	-69.2371	-71.4606
89.85	-74.8015	-73.7005	-71.6688	-69.5206	-67.8488	-69.1891	-71.3968
89.9	-74.8432	-73.7642	-71.7311	-69.6096	-67.8391	-69.1603	-71.3114
89.95	-74.8829	-73.808	-71.794	-69.694	-67.8674	-69.1528	-71.2231
90	-74.9087	-73.8334	-71.8716	-69.7739	-67.9236	-69.1551	-71.1565
90.05	-74.9137	-73.8414	-71.9745	-69.8536	-67.9886	-69.1499	-71.1271
90.1	-74.8945	-73.8341	-72.1025	-69.9404	-68.0433	-69.126	-71.1313
90.15	-74.8507	-73.8176	-72.241	-70.0407	-68.0759	-69.0837	-71.1482
90.2	-74.786	-73.8006	-72.3675	-70.1545	-68.0866	-69.0314	-71.1497
90.25	-74.7099	-73.7907	-72.46	-70.2697	-68.0871	-68.9764	-71.1129
90.3	-74.6362	-73.7915	-72.5061	-70.3653	-68.0947	-68.9194	-71.0277
90.35	-74.5795	-73.8032	-72.5059	-70.4208	-68.1242	-68.8574	-70.8965
90.4	-74.55	-73.8268	-72.47	-70.4279	-68.1824	-68.7891	-70.7293
90.45	-74.5507	-73.8657	-72.4165	-70.3977	-68.266	-68.7177	-70.5402
90.5	-74.5763	-73.9236	-72.3658	-70.3563	-68.3643	-68.6482	-70.3467
90.55	-74.6149	-73.9994	-72.3359	-70.3335	-68.4619	-68.5846	-70.1693
90.6	-74.6505	-74.0849	-72.3377	-70.3495	-68.5443	-68.5311	-70.0278
90.65	-74.6671	-74.167	-72.3712	-70.4086	-68.6017	-68.4907	-69.9365
90.7	-74.6514	-74.2341	-72.4271	-70.5016	-68.6301	-68.4627	-69.9006
90.75	-74.5988	-74.2813	-72.4936	-70.6131	-68.6302	-68.4411	-69.9154
90.8	-74.5179	-74.3114	-72.5652	-70.7272	-68.6066	-68.4179	-69.9679
90.85	-74.4292	-74.33	-72.6462	-70.8298	-68.5695	-68.391	-70.0393
90.9	-74.3564	-74.3418	-72.7441	-70.9106	-68.5329	-68.3668	-70.1093
90.95	-74.3172	-74.3488	-72.8591	-70.967	-68.509	-68.3574	-70.1599
91	-74.3168	-74.3533	-72.9781	-71.0076	-68.5003	-68.3717	-70.1778
91.05	-74.3478	-74.3602	-73.0806	-71.049	-68.4971	-68.4093	-70.1582
91.1	-74.3927	-74.3759	-73.1517	-71.1058	-68.4841	-68.461	-70.1051
91.15	-74.4291	-74.4049	-73.1918	-71.1802	-68.4522	-68.5149	-70.0295
91.2	-74.4363	-74.4466	-73.2161	-71.2585	-68.4082	-68.5637	-69.9429
91.25	-74.4037	-74.4939	-73.2451	-71.3187	-68.3735	-68.6051	-69.8519
91.3	-74.3354	-74.5372	-73.2929	-71.3438	-68.3706	-68.6367	-69.7573
91.35	-74.2494	-74.5703	-73.3629	-71.3318	-68.4074	-68.652	-69.6564
91.4	-74.1694	-74.5941	-73.4514	-71.2951	-68.4707	-68.6415	-69.5463
91.45	-74.114	-74.6129	-73.5532	-71.2546	-68.534	-68.6	-69.4264
91.5	-74.0881	-74.6275	-73.6649	-71.232	-68.5749	-68.5322	-69.3008
91.55	-74.0837	-74.6322	-73.7835	-71.2422	-68.5909	-68.4521	-69.1795
91.6	-74.0861	-74.6199	-73.9041	-71.2871	-68.6018	-68.3754	-69.0748
91.65	-74.0843	-74.59	-74.0186	-71.3534	-68.637	-68.3113	-68.9935
91.7	-74.0765	-74.5525	-74.1172	-71.4204	-68.7139	-68.2621	-68.9322
91.75	-74.069	-74.522	-74.1914	-71.4741	-68.8254	-68.2279	-68.8794
91.8	-74.0689	-74.5078	-74.2396	-71.5158	-68.9459	-68.2109	-68.8234
91.85	-74.0753	-74.5071	-74.2707	-71.5579	-69.0498	-68.2134	-68.7602
91.9	-74.0782	-74.5072	-74.3017	-71.6122	-69.1256	-68.2338	-68.6942
91.95	-74.0623	-74.4957	-74.3482	-71.6804	-69.1762	-68.2648	-68.633
92	-74.0156	-74.4685	-74.4139	-71.757	-69.2097	-68.2968	-68.5816
92.05	-73.9359	-74.4301	-74.4877	-71.8371	-69.2328	-68.3229	-68.5403
92.1	-73.8333	-74.3892	-74.5499	-71.9216	-69.2515	-68.3425	-68.5052
92.15	-73.7279	-74.355	-74.582	-72.0146	-69.274	-68.3587	-68.4717
92.2	-73.6411	-74.3361	-74.5752	-72.1177	-69.3095	-68.3742	-68.4373
92.25	-73.5868	-74.3369	-74.5335	-72.2246	-69.3642	-68.389	-68.4033
92.3	-73.5649	-74.3529	-74.4719	-72.3232	-69.4362	-68.4019	-68.3742
92.35	-73.562	-74.3713	-74.4132	-72.4004	-69.5171	-68.4151	-68.3559
92.4	-73.5594	-74.3797	-74.3838	-72.449	-69.5964	-68.4349	-68.3538
92.45	-73.5435	-74.3753	-74.4052	-72.4712	-69.6656	-68.4692	-68.371
92.5	-73.5134	-74.3663	-74.4831	-72.478	-69.7208	-68.5226	-68.4082
92.55	-73.4803	-74.3635	-74.601	-72.4838	-69.7629	-68.5933	-68.4639
92.6	-73.4588	-74.3725	-74.7261	-72.5002	-69.7961	-68.6711	-68.5346
92.65	-73.4566	-74.3917	-74.8268	-72.5316	-69.8259	-68.74	-68.6143
92.7	-73.4683	-74.4153	-74.8873	-72.5775	-69.8559	-68.7844	-68.6933
92.75	-73.479	-74.4394	-74.9097	-72.6374	-69.889	-68.7959	-68.7594
92.8	-73.4727	-74.4624	-74.9061	-72.7146	-69.9297	-68.7774	-68.803
92.85	-73.4419	-74.4818	-74.8892	-72.8154	-69.985	-68.7395	-68.8229
92.9	-73.3903	-74.491	-74.8697	-72.9446	-70.0601	-68.6964	-68.8255
92.95	-73.3287	-74.4813	-74.8576	-73.1003	-70.1535	-68.6609	-68.8172
93	-73.2673	-74.448	-74.8636	-73.2722	-70.2544	-68.6405	-68.7965
93.05	-73.2102	-74.3942	-74.897	-73.4441	-70.3466	-68.6358	-68.7529
93.1	-73.1563	-74.3301	-74.9586	-73.5994	-70.416	-68.6401	-68.674
93.15	-73.1038	-74.2684	-75.0362	-73.7268	-70.4579	-68.644	-68.5564
93.2	-73.053	-74.2188	-75.1065	-73.8234	-70.4822	-68.6413	-68.412
93.25	-73.0046	-74.1843	-75.1481	-73.8937	-70.5098	-68.6324	-68.2669
93.3	-72.9563	-74.1628	-75.1552	-73.9461	-70.5614	-68.624	-68.1517
93.35	-72.9021	-74.15	-75.1448	-73.9878	-70.6427	-68.6254	-68.0875
93.4	-72.8337	-74.1437	-75.1484	-74.0231	-70.7388	-68.6441	-68.0761
93.45	-72.7457	-74.1432	-75.1923	-74.0545	-70.824	-68.6816	-68.1001
93.5	-72.6387	-74.1475	-75.2804	-74.0843	-70.8799	-68.734	-68.1322
93.55	-72.5185	-74.1536	-75.3914	-74.1165	-70.9089	-68.7945	-68.148
93.6	-72.3922	-74.1561	-75.4919	-74.1558	-70.9314	-68.8574	-68.1362
93.65	-72.2645	-74.1491	-75.5561	-74.2059	-70.9735	-68.9191	-68.0998
93.7	-72.1389	-74.1276	-75.5777	-74.2695	-71.0527	-68.9767	-68.049
93.75	-72.022	-74.0889	-75.5705	-74.347	-71.1721	-69.0271	-67.9929
93.8	-71.9231	-74.0332	-75.5583	-74.436	-71.3216	-69.0676	-67.937
93.85	-71.8471	-73.9641	-75.5627	-74.5307	-71.4818	-69.0982	-67.8858
93.9	-71.7881	-73.8882	-75.5926	-74.622	-71.631	-69.1234	-67.8448
93.95	-71.7311	-73.8124	-75.6413	-74.7008	-71.7518	-69.1506	-67.8179
94	-71.6617	-73.7413	-75.6915	-74.763	-71.8365	-69.1843	-67.8039
94.05	-71.576	-73.6779	-75.7258	-74.8144	-71.8875	-69.2212	-67.7959
94.1	-71.4811	-73.6271	-75.7358	-74.8689	-71.9136	-69.2511	-67.7851
94.15	-71.387	-73.5947	-75.7241	-74.9421	-71.9255	-69.265	-67.7665
94.2	-71.298	-73.5832	-75.6987	-75.0409	-71.9315	-69.2634	-67.7441
94.25	-71.2118	-73.5883	-75.6648	-75.1585	-71.9362	-69.2595	-67.7284
94.3	-71.1253	-73.5995	-75.6235	-75.2773	-71.9413	-69.274	-67.7298
94.35	-71.04	-73.6046	-75.576	-75.3768	-71.9479	-69.325	-67.75
94.4	-70.9611	-73.5931	-75.5303	-75.443	-71.9581	-69.4187	-67.7812
94.45	-70.8934	-73.5582	-75.4991	-75.4731	-71.9746	-69.5459	-67.8117
94.5	-70.8386	-73.4986	-75.4929	-75.4742	-72.0002	-69.6856	-67.8348
94.55	-70.7959	-73.4209	-75.5134	-75.4568	-72.039	-69.8143	-67.8544
94.6	-70.7627	-73.3396	-75.553	-75.4287	-72.0991	-69.916	-67.8833
94.65	-70.7356	-73.2722	-75.6004	-75.3934	-72.1893	-69.9888	-67.936
94.7	-70.7113	-73.2315	-75.6448	-75.3529	-72.3128	-70.0448	-68.0177
94.75	-70.6858	-73.2204	-75.6775	-75.3107	-72.4607	-70.1033	-68.117
94.8	-70.6525	-73.2311	-75.6925	-75.2734	-72.6136	-70.1794	-68.2071
94.85	-70.6022	-73.2512	-75.6898	-75.2505	-72.7505	-70.2766	-68.257
94.9	-70.5279	-73.2714	-75.6781	-75.2516	-72.86	-70.3844	-68.2469
94.95	-70.4325	-73.2918	-75.672	-75.2843	-72.9447	-70.4854	-68.1792
95	-70.3295	-73.3188	-75.6821	-75.3504	-73.0175	-70.5634	-68.0789
95.05	-70.2367	-73.3584	-75.7066	-75.4456	-73.0901	-70.6115	-67.9843
95.1	-70.1675	-73.408	-75.7324	-75.5609	-73.1641	-70.6361	-67.93
95.15	-70.1267	-73.4543	-75.7445	-75.6835	-73.2305	-70.6538	-67.9324
95.2	-70.1119	-73.4778	-75.7363	-75.797	-73.2776	-70.6851	-67.984
95.25	-70.1155	-73.462	-75.71	-75.883	-73.2988	-70.7439	-68.0595
95.3	-70.1283	-73.4034	-75.6721	-75.926	-73.2965	-70.8303	-68.1296
95.35	-70.1407	-73.3134	-75.6293	-75.9195	-73.2781	-70.9298	-68.1751
95.4	-70.1438	-73.2095	-75.5874	-75.8703	-73.2518	-71.0207	-68.1942
95.45	-70.1285	-73.1034	-75.5506	-75.7977	-73.2235	-71.0862	-68.2007
95.5	-70.0856	-72.9961	-75.52	-75.7276	-73.1978	-71.1229	-68.2154
95.55	-70.0087	-72.8858	-75.4933	-75.6829	-73.1815	-71.1406	-68.2542
95.6	-69.8997	-72.7773	-75.4684	-75.673	-73.1848	-71.1536	-68.3195
95.65	-69.7716	-72.6837	-75.4445	-75.6918	-73.2184	-71.1737	-68.3987
95.7	-69.6453	-72.617	-75.4213	-75.7237	-73.2873	-71.2074	-68.4712
95.75	-69.5401	-72.5775	-75.3967	-75.7538	-73.3859	-71.2579	-68.5195
95.8	-69.4662	-72.5496	-75.3677	-75.7736	-73.4988	-71.3249	-68.5385
95.85	-69.4235	-72.5097	-75.332	-75.7807	-73.6072	-71.4039	-68.5377
95.9	-69.4071	-72.4411	-75.2892	-75.7755	-73.696	-71.4862	-68.5352
95.95	-69.4107	-72.3443	-75.2422	-75.7589	-73.7587	-71.5616	-68.5486
96	-69.4252	-72.2343	-75.1949	-75.7348	-73.7989	-71.6228	-68.5859
96.05	-69.4373	-72.1268	-75.1488	-75.7135	-73.8278	-71.6681	-68.6408
96.1	-69.4325	-72.0269	-75.0995	-75.7112	-73.86	-71.6994	-68.696
96.15	-69.4022	-71.9294	-75.0394	-75.7429	-73.9084	-71.7167	-68.7327
96.2	-69.3491	-71.829	-74.9649	-75.8116	-73.9794	-71.716	-68.7431
96.25	-69.2842	-71.7272	-74.882	-75.9034	-74.0698	-71.6936	-68.7357
96.3	-69.2177	-71.6311	-74.8045	-75.9925	-74.1652	-71.6557	-68.7306
96.35	-69.1528	-71.5457	-74.7458	-76.0551	-74.2452	-71.6195	-68.7471
96.4	-69.0849	-71.4698	-74.7113	-76.081	-74.2928	-71.6048	-68.7905
96.45	-69.008	-71.3967	-74.6965	-76.0786	-74.3061	-71.6217	-68.8496
96.5	-68.9201	-71.32	-74.6907	-76.0701	-74.3023	-71.6667	-68.9046
96.55	-68.8252	-71.2382	-74.6834	-76.0796	-74.3089	-71.7283	-68.9406
96.6	-68.7319	-71.155	-74.6683	-76.1201	-74.3474	-71.7954	-68.9565
96.65	-68.6504	-71.0771	-74.6441	-76.1882	-74.4225	-71.8613	-68.9641
96.7	-68.5895	-71.0115	-74.6127	-76.2677	-74.523	-71.9235	-68.9781
96.75	-68.5532	-70.961	-74.578	-76.3399	-74.6331	-71.9839	-69.0061
96.8	-68.5381	-70.9214	-74.544	-76.3924	-74.7408	-72.0498	-69.0451
96.85	-68.534	-70.8812	-74.5134	-76.4206	-74.8404	-72.1324	-69.0853
96.9	-68.5277	-70.8283	-74.4864	-76.4248	-74.9308	-72.2395	-69.1163
96.95	-68.5066	-70.7592	-74.4625	-76.4082	-75.0124	-72.3677	-69.1337
97	-68.4616	-70.6832	-74.4425	-76.378	-75.084	-72.5009	-69.1426
97.05	-68.3894	-70.616	-74.4282	-76.3466	-75.1416	-72.618	-69.1546
97.1	-68.294	-70.5694	-74.4203	-76.3289	-75.1801	-72.7054	-69.178
97.15	-68.1864	-70.544	-74.4174	-76.335	-75.1979	-72.7631	-69.2091
97.2	-68.0822	-70.5317	-74.418	-76.3652	-75.1999	-72.8019	-69.233
97.25	-67.9964	-70.5223	-74.4216	-76.4106	-75.1976	-72.8348	-69.2348
97.3	-67.9383	-70.5088	-74.4293	-76.4582	-75.203	-72.8706	-69.2143
97.35	-67.907	-70.4874	-74.4407	-76.4957	-75.2231	-72.9111	-69.191
97.4	-67.8913	-70.4565	-74.4529	-76.5135	-75.2573	-72.9529	-69.1948
97.45	-67.8762	-70.4169	-74.4613	-76.5065	-75.3019	-72.9899	-69.2475
97.5	-67.8507	-70.3711	-74.4631	-76.4755	-75.3557	-73.0165	-69.349
97.55	-67.8118	-70.3217	-74.4586	-76.4301	-75.4212	-73.0302	-69.4775
97.6	-67.7624	-70.2706	-74.4499	-76.386	-75.4982	-73.0341	-69.6013
97.65	-67.7062	-70.2192	-74.4374	-76.3565	-75.5787	-73.039	-69.6936
97.7	-67.6465	-70.1708	-74.4191	-76.3438	-75.6487	-73.061	-69.7417
97.75	-67.587	-70.1294	-74.3915	-76.3362	-75.6969	-73.1147	-69.7504
97.8	-67.5331	-70.0975	-74.3511	-76.3181	-75.7205	-73.2053	-69.7396
97.85	-67.4903	-70.074	-74.2964	-76.2811	-75.7232	-73.3259	-69.7352
97.9	-67.4605	-70.0543	-74.2294	-76.2276	-75.7091	-73.4615	-69.756
97.95	-67.4386	-70.0312	-74.1554	-76.1652	-75.6807	-73.5966	-69.8054
98	-67.4127	-69.9977	-74.0798	-76.1016	-75.6427	-73.7221	-69.8727
98.05	-67.3702	-69.9501	-74.0045	-76.044	-75.6067	-73.8368	-69.9423
98.1	-67.305	-69.8894	-73.9264	-76.001	-75.5901	-73.9442	-70.0034
98.15	-67.2218	-69.8193	-73.8404	-75.9787	-75.6069	-74.0463	-70.0551
98.2	-67.1344	-69.7431	-73.7445	-75.9755	-75.6575	-74.1379	-70.1029
98.25	-67.0597	-69.6619	-73.6421	-75.9815	-75.7292	-74.2085	-70.1522
98.3	-67.0099	-69.5753	-73.5415	-75.9844	-75.8044	-74.2513	-70.2033
98.35	-66.9897	-69.4823	-73.4507	-75.976	-75.87	-74.2719	-70.254
98.4	-66.9965	-69.3837	-73.3736	-75.9552	-75.9202	-74.2865	-70.3073
98.45	-67.0233	-69.2838	-73.3096	-75.9261	-75.9546	-74.3125	-70.3742
98.5	-67.0602	-69.1927	-73.2563	-75.8929	-75.9766	-74.3559	-70.4682
98.55	-67.0948	-69.1222	-73.2133	-75.8561	-75.994	-74.4099	-70.5945
98.6	-67.1139	-69.0801	-73.1816	-75.8128	-76.0153	-74.4622	-70.7446
98.65	-67.1094	-69.0635	-73.1637	-75.7615	-76.0439	-74.5047	-70.8991
98.7	-67.0833	-69.059	-73.1631	-75.7067	-76.0744	-74.5387	-71.0365
98.75	-67.0491	-69.047	-73.1821	-75.6568	-76.0962	-74.5733	-71.1409
98.8	-67.0254	-69.0102	-73.2151	-75.6179	-76.1003	-74.6212	-71.2069
98.85	-67.0248	-68.9421	-73.2422	-75.5886	-76.0843	-74.6945	-71.24
98.9	-67.0477	-68.8493	-73.2339	-75.5613	-76.0529	-74.7999	-71.2558
98.95	-67.0845	-68.7473	-73.1661	-75.5286	-76.0136	-74.9355	-71.275
99	-67.1258	-68.651	-73.0367	-75.4892	-75.9721	-75.0906	-71.3168
99.05	-67.1699	-68.5684	-72.87	-75.4473	-75.9299	-75.2497	-71.3917
99.1	-67.2225	-68.4995	-72.7043	-75.4088	-75.8868	-75.3988	-71.4994
99.15	-67.2873	-68.4414	-72.5705	-75.3777	-75.8445	-75.5299	-71.6315
99.2	-67.3581	-68.3921	-72.4759	-75.3558	-75.8058	-75.6417	-71.7755
99.25	-67.4198	-68.3508	-72.403	-75.3426	-75.773	-75.735	-71.9198
99.3	-67.4571	-68.3166	-72.324	-75.3343	-75.7477	-75.81	-72.0569
99.35	-67.4648	-68.2855	-72.221	-75.3228	-75.7338	-75.8642	-72.1841
99.4	-67.4522	-68.2506	-72.0964	-75.299	-75.7368	-75.8941	-72.3011
99.45	-67.4362	-68.2042	-71.9684	-75.2587	-75.7605	-75.8974	-72.4072
99.5	-67.4309	-68.1417	-71.8585	-75.2071	-75.8026	-75.8735	-72.4992
99.55	-67.4408	-68.063	-71.7779	-75.1573	-75.8562	-75.824	-72.5708
99.6	-67.462	-67.9721	-71.7232	-75.1245	-75.9124	-75.7549	-72.6143
99.65	-67.4872	-67.8768	-71.6806	-75.1183	-75.9627	-75.6777	-72.6249
99.7	-67.5107	-67.7877	-71.6362	-75.1388	-75.9992	-75.6108	-72.6061
99.75	-67.5283	-67.7163	-71.5835	-75.1774	-76.0162	-75.5756	-72.5725
99.8	-67.5374	-67.6696	-71.5218	-75.2229	-76.0136	-75.5901	-72.545
99.85	-67.5377	-67.6462	-71.4523	-75.2679	-75.9998	-75.6607	-72.5416
[truncated: 49,614 more rows]

## Sheet: Fig. 1 Sb
	overlapping
	0deg	45deg	90 deg	135deg	180deg	225deg	270deg
	0.117501	0.180001	0.207501	0.217501	0.2225	0.1875	0.167501
	0.0325005	0.192501	0.214999	0.2475	0.26	0.255001	0.207501
	0.664999	0.1975	0.214999	0.242501	0.264999	0.2625	0.235
	0.217501	0.1975	0.2225	0.242501	0.257501	0.26	0.2375
	0.114999	0.192501	0.220001	0.245001	0.267501	0.270001	0.239999
	0.0975	0.2	0.225	0.242501	0.26	0.277499	0.245001
	0.132501	0.2	0.225	0.245001	0.264999	0.277499	0.264999
	0.1475	0.1975	0.227499	0.252499	0.2725	0.285	0.26
	0.1625	0.205001	0.230001	0.245001	0.267501	0.2875	0.2625
	0.155001	0.2	0.225	0.2475	0.2725	0.282501	0.255001
	0.15	0.205001	0.225	0.245001	0.280001	0.285	0.2475
	0.16	0.202499	0.2225	0.255001	0.2725	0.292501	0.267501
	0.155001	0.202499	0.217501	0.26	0.267501	0.292501	0.257501
	0.16	0.202499	0.230001	0.252499	0.270001	0.292501	0.267501
	0.1475	0.205001	0.2225	0.252499	0.270001	0.292501	0.275
	0.15	0.21	0.225	0.2475	0.277499	0.302499	0.295001
	0.155001	0.205001	0.225	0.242501	0.275	0.305001	0.282501
	0.15	0.202499	0.225	0.242501	0.275	0.305001	0.267501
	0.157501	0.205001	0.217501	0.242501	0.275	0.289999	0.277499
	0.1625	0.21	0.225	0.255001	0.280001	0.31	0.275
	0.1725	0.205001	0.227499	0.257501	0.275	0.289999	0.280001
	0.167501	0.202499	0.225	0.255001	0.277499	0.2975	0.280001
	0.16	0.207501	0.217501	0.252499	0.275	0.289999	0.285
	0.157501	0.202499	0.217501	0.255001	0.275003	0.300003	0.267501
	0.162503	0.202499	0.219998	0.255001	0.275003	0.302499	0.277499
	0.155001	0.200003	0.230001	0.250003	0.282498	0.292501	0.282498
	0.1725	0.202499	0.225003	0.255001	0.277499	0.292501	0.282498
	0.150003	0.202499	0.217501	0.250003	0.2725	0.294998	0.302499
	0.144998	0.202499	0.227499	0.2475	0.280001	0.294998	0.282498
	0.157498	0.200003	0.227499	0.252499	0.280001	0.292501	0.300003
	0.1725	0.207498	0.225003	0.26	0.282498	0.294998	0.287503
	0.152499	0.200003	0.230001	0.252499	0.280001	0.300003	0.294998
	0.16	0.207498	0.225003	0.26	0.282498	0.312503	0.294998
	0.164999	0.205001	0.227499	0.255001	0.269998	0.294998	0.31
	0.167501	0.202499	0.230001	0.252499	0.287503	0.294998	0.294998
	0.152499	0.202499	0.227499	0.257497	0.285	0.302499	0.300003
	0.182498	0.207498	0.227499	0.257497	0.275003	0.307497	0.292501
	0.162503	0.21	0.230001	0.250003	0.280001	0.317501	0.300003
	0.155001	0.207498	0.230001	0.255001	0.280001	0.31	0.307497
	0.155001	0.207498	0.232497	0.255001	0.294998	0.312503	0.2975
	0.162503	0.212503	0.232497	0.250003	0.292501	0.307497	0.312503
	0.164999	0.207498	0.230001	0.255001	0.287503	0.305001	0.302499
	0.1475	0.212503	0.232497	0.255001	0.287503	0.312503	0.302499
	0.144998	0.21	0.232497	0.262503	0.292501	0.300003	0.314999
	0.135	0.207498	0.232497	0.255001	0.282498	0.314999	0.302499
	0.157498	0.205001	0.227499	0.252499	0.280001	0.2975	0.307497
	0.182498	0.194997	0.232497	0.262503	0.287503	0.312503	0.307497
	0.155001	0.21	0.232497	0.26	0.287503	0.314999	0.312503
	0.152499	0.207498	0.230001	0.257497	0.285	0.307497	0.300003
	0.1475	0.207498	0.227499	0.252499	0.292501	0.3225	0.317501
	0.169997

## Sheet: Fig. 1 Sc
	17a10001
	zero deg	45 deg	90 deg	135 deg	180 deg	225 deg	270 deg
0	-70.0976	-70.6008	-70.6853	-70.6444	-70.2311	-70.0518	-70.0987	0	0
0.05	-70.0582	-70.561	-70.6591	-70.5285	-70.1458	-70.2957	-70.0925	2500	0
0.1	-70.0085	-70.5303	-70.6313	-70.4343	-70.1045	-70.4284	-70.0624
0.15	-69.9332	-70.5432	-70.5414	-70.3992	-70.0819	-70.4373	-70.0642
0.2	-69.8347	-70.5827	-70.3376	-70.3673	-70.0534	-70.3585	-70.085
0.25	-69.733	-70.6038	-70.0808	-70.2687	-70.0602	-70.2302	-70.0765
0.3	-69.6209	-70.5617	-69.9017	-70.1241	-70.1272	-70.0489	-70.0503
0.35	-69.5386	-70.5059	-69.8998	-70.0721	-70.2817	-69.9187	-70.1328
0.4	-69.4837	-70.4324	-69.9412	-70.0925	-70.4213	-69.8882	-70.2712
0.45	-69.4918	-70.3625	-69.9201	-70.1109	-70.4905	-69.9355	-70.2977
0.5	-69.5531	-70.31	-69.8868	-70.1115	-70.4939	-69.9682	-70.1299
0.55	-69.5978	-70.2782	-69.9034	-70.1601	-70.4433	-69.9604	-69.9159
0.6	-69.5995	-70.2476	-69.9227	-70.2468	-70.3472	-69.9784	-69.8394
0.65	-69.5763	-70.2066	-69.8882	-70.2775	-70.2317	-70.0262	-69.9171
0.7	-69.5342	-70.1761	-69.8516	-70.2228	-70.1557	-70.0184	-70.0421
0.75	-69.467	-70.1789	-69.891	-70.1433	-70.1437	-69.9664	-70.1426
0.8	-69.4234	-70.2477	-69.9894	-70.0798	-70.1903	-69.9728	-70.2021
0.85	-69.4466	-70.3952	-70.092	-70.0155	-70.2795	-70.0458	-70.1842
0.9	-69.5105	-70.5407	-70.164	-69.9756	-70.3839	-70.0961	-70.0806
0.95	-69.5525	-70.6005	-70.1747	-70.0132	-70.4564	-70.0819	-69.9547
1	-69.5714	-70.5746	-70.0882	-70.0773	-70.4485	-70.0451	-69.8585
1.05	-69.5824	-70.4875	-69.9238	-70.0798	-70.3586	-70.011	-69.7862
1.1	-69.579	-70.3801	-69.7743	-70.0419	-70.2284	-69.957	-69.7114
1.15	-69.5682	-70.3224	-69.6875	-70.036	-70.1409	-69.9077	-69.6593
1.2	-69.6036	-70.3396	-69.6269	-70.0616	-70.1527	-69.9198	-69.6677
1.25	-69.6723	-70.4046	-69.5629	-70.0589	-70.2669	-70.0082	-69.7024
1.3	-69.6772	-70.471	-69.5575	-70.0149	-70.4209	-70.1609	-69.7109
1.35	-69.5567	-70.48	-69.6805	-69.9959	-70.5456	-70.3324	-69.6911
1.4	-69.3665	-70.4362	-69.8891	-70.0211	-70.5884	-70.4234	-69.6646
1.45	-69.2237	-70.3984	-70.0832	-70.0183	-70.5311	-70.3776	-69.6459
1.5	-69.2239	-70.3712	-70.1833	-69.9625	-70.3802	-70.2486	-69.6463
1.55	-69.3956	-70.3601	-70.1571	-69.9135	-70.1956	-70.1459	-69.6804
1.6	-69.6457	-70.4169	-70.0305	-69.9058	-70.0541	-70.1545	-69.7334
1.65	-69.8331	-70.4921	-69.8991	-69.913	-70	-70.2645	-69.7582
1.7	-69.8825	-70.471	-69.8726	-69.8851	-70.0196	-70.3832	-69.758
1.75	-69.8279	-70.3753	-69.9359	-69.8198	-70.0872	-70.4561	-69.7658
1.8	-69.7192	-70.3049	-69.9719	-69.7627	-70.1868	-70.4874	-69.7723
1.85	-69.5852	-70.275	-69.9284	-69.7354	-70.2995	-70.4963	-69.7766
1.9	-69.4807	-70.2629	-69.8659	-69.7645	-70.4034	-70.4973	-69.8159
1.95	-69.4857	-70.262	-69.8612	-69.8621	-70.4855	-70.4745	-69.9067
2	-69.6287	-70.2566	-69.9037	-69.9912	-70.5454	-70.4347	-70.0061
2.05	-69.8217	-70.2504	-69.9448	-70.0782	-70.5671	-70.4236	-70.0467
2.1	-69.9475	-70.2511	-69.9521	-70.11	-70.5425	-70.4889	-70.0323
2.15	-69.9947	-70.2271	-69.9232	-70.1279	-70.4997	-70.6127	-70.0208
2.2	-70.0159	-70.1952	-69.8991	-70.1623	-70.5014	-70.6885	-70.043
2.25	-70.0203	-70.2118	-69.8976	-70.1946	-70.5614	-70.6123	-70.1101
2.3	-69.9623	-70.2304	-69.8717	-70.2166	-70.6313	-70.3899	-70.1964
2.35	-69.8488	-70.1744	-69.797	-70.2409	-70.6383	-70.1599	-70.2164
2.4	-69.7597	-70.0889	-69.7305	-70.2779	-70.5593	-70.0615	-70.1761
2.45	-69.7494	-70.055	-69.7388	-70.3272	-70.4163	-70.1317	-70.1949
2.5	-69.795	-70.0589	-69.7842	-70.3613	-70.2669	-70.3247	-70.2994
2.55	-69.8243	-70.0642	-69.8143	-70.3451	-70.1793	-70.5567	-70.4054
2.6	-69.7935	-70.0762	-69.895	-70.2584	-70.1933	-70.72	-70.4652
2.65	-69.6985	-70.1132	-70.0866	-70.154	-70.2953	-70.7137	-70.4602
2.7	-69.5562	-70.1916	-70.3042	-70.1079	-70.4225	-70.5372	-70.385
2.75	-69.4295	-70.2768	-70.4169	-70.1594	-70.5235	-70.2857	-70.2812
2.8	-69.3965	-70.3219	-70.4047	-70.2731	-70.5831	-70.0791	-70.1942
2.85	-69.4632	-70.3118	-70.3395	-70.3825	-70.6276	-69.9828	-70.1425
2.9	-69.5449	-70.2607	-70.2645	-70.4415	-70.6465	-70.0152	-70.0959
2.95	-69.58	-70.1695	-70.2143	-70.4162	-70.591	-70.1656	-70.0463
3	-69.6095	-70.0396	-70.2555	-70.3067	-70.4452	-70.3625	-70.0234
3.05	-69.6586	-69.9027	-70.3537	-70.1639	-70.2763	-70.4894	-70.0618
3.1	-69.6824	-69.8363	-70.3627	-70.0772	-70.1338	-70.4703	-70.1357
3.15	-69.6395	-69.8809	-70.1788	-70.0832	-70.0247	-70.3465	-70.1783
3.2	-69.5531	-70.0014	-69.886	-70.1465	-69.9963	-70.1964	-70.1393
3.25	-69.4757	-70.1237	-69.6946	-70.2257	-70.1053	-70.075	-70.076
3.3	-69.4266	-70.212	-69.7164	-70.2842	-70.3204	-70.0105	-70.1017
3.35	-69.415	-70.2465	-69.8978	-70.289	-70.5266	-70.0354	-70.2477
3.4	-69.4471	-70.2237	-70.129	-70.2267	-70.6529	-70.1258	-70.4037
3.45	-69.4916	-70.1812	-70.3317	-70.1496	-70.6826	-70.2069	-70.4625
3.5	-69.5106	-70.2073	-70.442	-70.1201	-70.6126	-70.2355	-70.4468
3.55	-69.4924	-70.3269	-70.4201	-70.1457	-70.4488	-70.2359	-70.4263
3.6	-69.4539	-70.4623	-70.3124	-70.1736	-70.2441	-70.2246	-70.3948
3.65	-69.4094	-70.5443	-70.2147	-70.1834	-70.08	-70.1567	-70.293
3.7	-69.3744	-70.5916	-70.1687	-70.2075	-70.0009	-70.0086	-70.1258
3.75	-69.3798	-70.6161	-70.1392	-70.2747	-70.0211	-69.8303	-69.9395
3.8	-69.4162	-70.5837	-70.1175	-70.3502	-70.1091	-69.7067	-69.7909
3.85	-69.4397	-70.4952	-70.1383	-70.393	-70.1657	-69.6633	-69.744
3.9	-69.4419	-70.4195	-70.2012	-70.3991	-70.092	-69.6984	-69.8339
3.95	-69.4454	-70.4129	-70.2493	-70.3728	-69.9193	-69.8109	-69.9893
4	-69.4648	-70.4242	-70.2373	-70.3085	-69.8107	-69.9748	-70.0764
4.05	-69.4837	-70.3656	-70.1714	-70.2468	-69.8722	-70.1068	-70.0381
4.1	-69.4879	-70.2069	-70.0537	-70.2363	-70.0564	-70.1516	-69.9174
4.15	-69.49	-70.0043	-69.9176	-70.2556	-70.2444	-70.1453	-69.784
4.2	-69.4743	-69.8156	-69.8521	-70.2365	-70.3772	-70.1665	-69.6749
4.25	-69.4209	-69.691	-69.8917	-70.1784	-70.4461	-70.2337	-69.6474
4.3	-69.3718	-69.6775	-69.9542	-70.117	-70.4485	-70.2794	-69.7579
4.35	-69.3808	-69.7864	-69.9446	-70.0351	-70.4344	-70.2286	-69.9688
4.4	-69.4372	-69.949	-69.8921	-69.8825	-70.4724	-70.0782	-70.1599
4.45	-69.4943	-70.0682	-69.8895	-69.7125	-70.5519	-69.9218	-70.2672
4.5	-69.5748	-70.1066	-69.9383	-69.6419	-70.5749	-69.8533	-70.31
4.55	-69.7099	-70.1131	-69.9566	-69.6919	-70.4846	-69.8932	-70.313
4.6	-69.8144	-70.1527	-69.9104	-69.7497	-70.3378	-69.9766	-70.2735
4.65	-69.7987	-70.2444	-69.8665	-69.7434	-70.2394	-70.0424	-70.1755
4.7	-69.6953	-70.3686	-69.8861	-69.7094	-70.2745	-70.0759	-70.013
4.75	-69.5751	-70.4715	-69.9481	-69.6908	-70.4457	-70.1046	-69.811
4.8	-69.468	-70.4936	-69.9918	-69.662	-70.6478	-70.1405	-69.6471
4.85	-69.3842	-70.3993	-69.9532	-69.6187	-70.7538	-70.1776	-69.6019
4.9	-69.3495	-70.2354	-69.8379	-69.6232	-70.7435	-70.204	-69.6923
4.95	-69.3848	-70.091	-69.7385	-69.7223	-70.7299	-70.2409	-69.8664
5	-69.4677	-69.9991	-69.7611	-69.8933	-70.7848	-70.3185	-70.0525
5.05	-69.5559	-69.936	-69.9072	-70.0733	-70.8554	-70.4479	-70.2006
5.1	-69.6311	-69.9187	-70.0758	-70.2078	-70.8646	-70.5648	-70.2824
5.15	-69.6818	-70.0119	-70.1833	-70.2528	-70.8185	-70.5809	-70.3024
5.2	-69.6951	-70.1959	-70.1984	-70.21	-70.7878	-70.486	-70.3009
5.25	-69.6712	-70.3753	-70.1088	-70.1267	-70.7919	-70.3889	-70.3201
5.3	-69.6269	-70.4697	-69.92	-70.055	-70.802	-70.3987	-70.3556
5.35	-69.6173	-70.4542	-69.7134	-69.9894	-70.8301	-70.5213	-70.3931
5.4	-69.6663	-70.3288	-69.5751	-69.9053	-70.895	-70.6542	-70.4257
5.45	-69.708	-70.1382	-69.532	-69.7917	-70.9443	-70.7113	-70.4563
5.5	-69.7121	-70.0054	-69.564	-69.6658	-70.8809	-70.6904	-70.4681
5.55	-69.7281	-70.0356	-69.6618	-69.5642	-70.7094	-70.6521	-70.4534
5.6	-69.7634	-70.2272	-69.7887	-69.5354	-70.5564	-70.6463	-70.4118
5.65	-69.7875	-70.448	-69.905	-69.5939	-70.4894	-70.6873	-70.3423
5.7	-69.784	-70.5422	-70	-69.6995	-70.4679	-70.7343	-70.2305
5.75	-69.7398	-70.4312	-70.0891	-69.833	-70.4467	-70.7477	-70.0937
5.8	-69.6911	-70.1755	-70.1535	-70.0125	-70.4525	-70.717	-69.9959
5.85	-69.6976	-69.9409	-70.158	-70.2313	-70.5125	-70.6665	-69.9882
5.9	-69.7436	-69.8624	-70.0904	-70.4038	-70.575	-70.6111	-70.0517
5.95	-69.7832	-69.9434	-70.007	-70.4491	-70.5873	-70.5367	-70.1219
6	-69.7965	-70.0839	-69.9807	-70.3675	-70.5751	-70.4175	-70.1685
6.05	-69.7364	-70.2145	-70.0462	-70.2215	-70.5496	-70.2865	-70.2001
6.1	-69.623	-70.3282	-70.1709	-70.0494	-70.4735	-70.2113	-70.2214
6.15	-69.5749	-70.4223	-70.3037	-69.8785	-70.3494	-70.2013	-70.1941
6.2	-69.599	-70.5015	-70.3852	-69.7889	-70.2735	-70.1886	-70.1108
6.25	-69.5855	-70.5906	-70.364	-69.8554	-70.3082	-70.1264	-70.0097
6.3	-69.5361	-70.7003	-70.221	-70.0551	-70.3729	-70.0415	-69.9119
6.35	-69.5323	-70.7752	-70.0123	-70.2646	-70.377	-69.9731	-69.7729
6.4	-69.553	-70.756	-69.8318	-70.391	-70.3457	-69.9393	-69.5708
6.45	-69.5321	-70.6677	-69.7354	-70.4189	-70.3308	-69.9713	-69.3812
6.5	-69.4675	-70.5788	-69.6916	-70.3551	-70.3199	-70.1158	-69.2977
6.55	-69.3972	-70.529	-69.66	-70.1981	-70.2828	-70.3315	-69.3415
6.6	-69.3958	-70.5047	-69.6367	-70.0107	-70.2421	-70.5135	-69.4596
6.65	-69.5185	-70.4957	-69.6325	-69.9193	-70.2479	-70.5691	-69.5979
6.7	-69.6947	-70.4879	-69.6391	-69.9595	-70.2927	-70.4871	-69.7034
6.75	-69.8124	-70.4543	-69.6561	-70.0385	-70.3431	-70.3183	-69.7616
6.8	-69.8586	-70.4032	-69.6901	-70.0528	-70.3851	-70.1496	-69.7956
6.85	-69.8529	-70.3769	-69.7258	-70.0016	-70.3929	-70.0291	-69.8305
6.9	-69.8033	-70.4033	-69.7363	-69.9297	-70.3662	-69.944	-69.8498
6.95	-69.7611	-70.4478	-69.7286	-69.8612	-70.3616	-69.8699	-69.8429
7	-69.7706	-70.4776	-69.7193	-69.8256	-70.4121	-69.8224	-69.8611
7.05	-69.7773	-70.5247	-69.7004	-69.8464	-70.5173	-69.8539	-69.9404
7.1	-69.7566	-70.6059	-69.6769	-69.8931	-70.6509	-69.9908	-70.0411
7.15	-69.7667	-70.6632	-69.7073	-69.8807	-70.7363	-70.2071	-70.0805
7.2	-69.802	-70.6102	-69.8422	-69.7859	-70.6985	-70.4138	-70.0364
7.25	-69.8015	-70.4572	-70.029	-69.6908	-70.5401	-70.5379	-69.9366
7.3	-69.8058	-70.3354	-70.1564	-69.6785	-70.3385	-70.5503	-69.8255
7.35	-69.8736	-70.3305	-70.1728	-69.7637	-70.1964	-70.4683	-69.7626
7.4	-69.9324	-70.3927	-70.1385	-69.889	-70.1465	-70.3342	-69.8016
7.45	-69.9238	-70.4086	-70.1314	-69.9901	-70.1456	-70.2034	-69.9318
7.5	-69.9333	-70.3374	-70.1701	-70.0101	-70.183	-70.1264	-70.0639
7.55	-70.0041	-70.2327	-70.2105	-69.9365	-70.2595	-70.1245	-70.1341
7.6	-70.0423	-70.1491	-70.2089	-69.8421	-70.3166	-70.193	-70.1429
7.65	-70.0134	-70.1062	-70.151	-69.7946	-70.3168	-70.2826	-70.1019
7.7	-69.9835	-70.0973	-70.0795	-69.7824	-70.3027	-70.3378	-70.0315
7.75	-69.9637	-70.0958	-70.0379	-69.7578	-70.2977	-70.3407	-69.9918
7.8	-69.9334	-70.0986	-70.0314	-69.7347	-70.2818	-70.3272	-70.0299
7.85	-69.9385	-70.1207	-70.036	-69.7787	-70.2562	-70.3601	-70.0729
7.9	-69.9957	-70.1781	-70.0375	-69.8892	-70.2737	-70.4662	-70.0048
7.95	-70.0393	-70.2579	-70.0389	-69.9923	-70.3872	-70.6249	-69.8243
8	-70.0391	-70.33	-70.043	-70.0171	-70.5285	-70.7812	-69.6555
8.05	-70.0098	-70.399	-70.0655	-69.9532	-70.5714	-70.882	-69.6181
8.1	-69.968	-70.4481	-70.1219	-69.8585	-70.4803	-70.883	-69.7237
8.15	-69.8873	-70.4095	-70.1997	-69.7961	-70.3521	-70.7922	-69.9218
8.2	-69.7442	-70.2509	-70.2354	-69.7927	-70.2893	-70.6715	-70.1301
8.25	-69.6004	-70.0172	-70.2005	-69.8247	-70.3226	-70.6032	-70.2615
8.3	-69.5605	-69.8065	-70.1269	-69.869	-70.4188	-70.6125	-70.2927
8.35	-69.6272	-69.7196	-70.0546	-69.9569	-70.5348	-70.6666	-70.2874
8.4	-69.6968	-69.7847	-69.9907	-70.0976	-70.5973	-70.7284	-70.3213
8.45	-69.7313	-69.9456	-69.9484	-70.2354	-70.5528	-70.7672	-70.3673
8.5	-69.8008	-70.1156	-69.9789	-70.3097	-70.4369	-70.7401	-70.3474
8.55	-69.9364	-70.2625	-70.1032	-70.3134	-70.3602	-70.6167	-70.2838
8.6	-70.0573	-70.3901	-70.2708	-70.2731	-70.3753	-70.4513	-70.2502
8.65	-70.0985	-70.4418	-70.3963	-70.1808	-70.4305	-70.3459	-70.2474
8.7	-70.0854	-70.3685	-70.4406	-70.0381	-70.4733	-70.3169	-70.1959
8.75	-70.041	-70.2406	-70.3858	-69.9351	-70.4937	-70.293	-70.063
8.8	-69.9267	-70.1781	-70.2292	-69.9487	-70.4675	-70.2559	-69.9193
8.85	-69.7454	-70.2256	-70.0169	-70.0429	-70.3514	-70.2869	-69.8233
8.9	-69.6066	-70.3159	-69.8498	-70.1309	-70.1926	-70.4014	-69.7515
8.95	-69.6149	-70.3541	-69.8167	-70.201	-70.0962	-70.4755	-69.673
9	-69.7448	-70.3575	-69.909	-70.2999	-70.1114	-70.4194	-69.6317
9.05	-69.8916	-70.3906	-70.0567	-70.4111	-70.208	-70.2938	-69.6993
9.1	-69.9982	-70.4448	-70.1982	-70.4696	-70.3546	-70.2002	-69.8585
9.15	-70.0747	-70.4959	-70.2974	-70.4537	-70.5234	-70.155	-70.0361
9.2	-70.1344	-70.5568	-70.3016	-70.3619	-70.6306	-70.1203	-70.1887
9.25	-70.1457	-70.6206	-70.2001	-70.215	-70.5846	-70.1015	-70.2954
9.3	-70.0764	-70.6582	-70.0989	-70.087	-70.3827	-70.1057	-70.3441
9.35	-69.9566	-70.6607	-70.113	-70.0589	-70.132	-70.0923	-70.3326
9.4	-69.8645	-70.657	-70.2273	-70.131	-69.9471	-70.0583	-70.2808
9.45	-69.8487	-70.6747	-70.3029	-70.2007	-69.8992	-70.0289	-70.2024
9.5	-69.8887	-70.6672	-70.2579	-70.1895	-69.9962	-69.9913	-70.0942
9.55	-69.9471	-70.5743	-70.1558	-70.1393	-70.1788	-69.9501	-69.9831
9.6	-69.9811	-70.4452	-70.0827	-70.0966	-70.3484	-69.9433	-69.9142
9.65	-69.9684	-70.3677	-70.066	-70.0312	-70.472	-69.9785	-69.8747
9.7	-69.9229	-70.3462	-70.0799	-69.926	-70.583	-70.0286	-69.81
9.75	-69.9003	-70.3421	-70.094	-69.8419	-70.7025	-70.0504	-69.7041
9.8	-69.916	-70.3447	-70.0688	-69.8601	-70.7982	-70.0355	-69.6281
9.85	-69.9111	-70.372	-69.9728	-69.9467	-70.8473	-70.0566	-69.6574
9.9	-69.8138	-70.4433	-69.8547	-69.9762	-70.8518	-70.1606	-69.7721
9.95	-69.641	-70.5254	-69.8006	-69.9407	-70.8211	-70.2764	-69.9171
10	-69.5153	-70.5582	-69.8067	-69.9607	-70.7534	-70.3276	-70.0576
10.05	-69.5355	-70.5696	-69.7668	-70.04	-70.6703	-70.3423	-70.1396
10.1	-69.673	-70.6054	-69.6516	-70.0488	-70.5957	-70.4104	-70.1081
10.15	-69.7966	-70.6256	-69.5891	-69.9131	-70.5391	-70.5287	-69.97
10.2	-69.8228	-70.6143	-69.6819	-69.7106	-70.4923	-70.5856	-69.8122
10.25	-69.7607	-70.6162	-69.872	-69.5635	-70.4689	-70.5343	-69.7313
10.3	-69.6629	-70.5996	-70.0277	-69.5322	-70.4762	-70.4327	-69.7413
10.35	-69.6071	-70.5291	-70.1111	-69.6224	-70.4814	-70.355	-69.7961
10.4	-69.6731	-70.4933	-70.1996	-69.7912	-70.4283	-70.3231	-69.8362
10.45	-69.8628	-70.5504	-70.3301	-69.9681	-70.3211	-70.3031	-69.8209
10.5	-70.0398	-70.6104	-70.4415	-70.1086	-70.2083	-70.2615	-69.7838
10.55	-70.0746	-70.5959	-70.464	-70.1788	-70.1335	-70.1815	-69.795
10.6	-69.9856	-70.5417	-70.4026	-70.1354	-70.1267	-70.0829	-69.8553
10.65	-69.887	-70.5019	-70.3181	-69.9824	-70.2176	-70.0203	-69.9274
10.7	-69.8627	-70.483	-70.2256	-69.8292	-70.4162	-70.063	-69.9897
10.75	-69.8899	-70.4445	-70.1131	-69.7796	-70.6773	-70.2326	-70.0205
10.8	-69.902	-70.347	-70.0337	-69.8295	-70.9253	-70.4596	-70.021
10.85	-69.8474	-70.2304	-70.0713	-69.9174	-71.0904	-70.6281	-70.0235
10.9	-69.7257	-70.1833	-70.2143	-70.0358	-71.153	-70.6642	-70.0297
10.95	-69.6202	-70.203	-70.318	-70.1736	-71.1169	-70.621	-70.0286
11	-69.6331	-70.2173	-70.2732	-70.2416	-71.0132	-70.5937	-70.027
11.05	-69.7701	-70.1544	-70.1499	-70.172	-70.8916	-70.6148	-70.0345
11.1	-69.8964	-70.0053	-70.0782	-70.0172	-70.8052	-70.6525	-70.0743
11.15	-69.8857	-69.8572	-70.101	-69.9085	-70.7469	-70.7008	-70.1247
11.2	-69.7763	-69.8175	-70.1819	-69.9253	-70.6808	-70.7661	-70.1243
11.25	-69.698	-69.8999	-70.2798	-70.0578	-70.6325	-70.8146	-70.0436
11.3	-69.7163	-70.0216	-70.3614	-70.223	-70.665	-70.7907	-69.9271
11.35	-69.7825	-70.122	-70.3761	-70.3364	-70.7707	-70.6721	-69.8359
11.4	-69.8388	-70.2042	-70.3196	-70.3592	-70.8562	-70.497	-69.787
11.45	-69.8981	-70.2696	-70.2822	-70.2953	-70.8741	-70.3083	-69.7538
11.5	-69.963	-70.2925	-70.3019	-70.188	-70.8482	-70.1502	-69.7393
11.55	-69.9977	-70.2793	-70.329	-70.0783	-70.8049	-70.0675	-69.7606
11.6	-69.9737	-70.2761	-70.3033	-69.9884	-70.7218	-70.0896	-69.8092
11.65	-69.9114	-70.3251	-70.2354	-69.9393	-70.5941	-70.1669	-69.8506
11.7	-69.8403	-70.4322	-70.1766	-69.9811	-70.4722	-70.2166	-69.9021
11.75	-69.7592	-70.5597	-70.1533	-70.1286	-70.4029	-70.2348	-70.0044
11.8	-69.6684	-70.6418	-70.1331	-70.279	-70.396	-70.2938	-70.1494
11.85	-69.5586	-70.6038	-70.1077	-70.3007	-70.4481	-70.4097	-70.2694
11.9	-69.422	-70.4352	-70.1193	-70.1748	-70.5608	-70.4806	-70.3346
11.95	-69.3089	-70.2057	-70.1862	-70.0044	-70.6563	-70.4215	-70.3769
12	-69.2885	-70.0271	-70.2536	-69.867	-70.6237	-70.2599	-70.4078
12.05	-69.3637	-69.9596	-70.2759	-69.7696	-70.4528	-70.0972	-70.3866
12.1	-69.4466	-69.9967	-70.2648	-69.6938	-70.2638	-69.9919	-70.2836
12.15	-69.4585	-70.0985	-70.2104	-69.6388	-70.1697	-69.9756	-70.1462
12.2	-69.4356	-70.2399	-70.0846	-69.5672	-70.1974	-70.0559	-70.0138
12.25	-69.4422	-70.3915	-69.9315	-69.4583	-70.3329	-70.1886	-69.9008
12.3	-69.4754	-70.5037	-69.8755	-69.3635	-70.5127	-70.3017	-69.8463
12.35	-69.5004	-70.5215	-69.9417	-69.3454	-70.6418	-70.3764	-69.9104
12.4	-69.5225	-70.4501	-69.999	-69.3655	-70.67	-70.436	-70.0477
12.45	-69.5681	-70.3556	-69.9396	-69.3665	-70.6459	-70.4623	-70.1031
12.5	-69.62	-70.3193	-69.7971	-69.3717	-70.6335	-70.4235	-70.0103
12.55	-69.6541	-70.3801	-69.6839	-69.4296	-70.6399	-70.3433	-69.8802
12.6	-69.6835	-70.5136	-69.6651	-69.4935	-70.6616	-70.2731	-69.8381
12.65	-69.7068	-70.6316	-69.73	-69.488	-70.7008	-70.1938	-69.8622
12.7	-69.7161	-70.6433	-69.8216	-69.4371	-70.7284	-70.0615	-69.8779
12.75	-69.7328	-70.5303	-69.8617	-69.4292	-70.6987	-69.9012	-69.8747
12.8	-69.7722	-70.3649	-69.8379	-69.4664	-70.6177	-69.8002	-69.8861
12.85	-69.8075	-70.214	-69.814	-69.469	-70.5432	-69.798	-69.9079
12.9	-69.7959	-70.1047	-69.8269	-69.4402	-70.5161	-69.873	-69.9461
12.95	-69.7636	-70.0478	-69.8375	-69.4776	-70.552	-69.9719	-70.0348
13	-69.7809	-70.0651	-69.7976	-69.6267	-70.6333	-70.0615	-70.1639
13.05	-69.8357	-70.1084	-69.7754	-69.8046	-70.7072	-70.1286	-70.245
13.1	-69.8598	-70.0861	-69.8676	-69.9278	-70.7194	-70.1892	-70.2355
13.15	-69.8541	-69.9737	-70.0503	-69.9833	-70.6648	-70.2692	-70.1827
13.2	-69.8641	-69.8607	-70.2171	-69.9863	-70.6003	-70.376	-70.1527
13.25	-69.8883	-69.8358	-70.3068	-69.934	-70.5475	-70.4648	-70.1526
13.3	-69.8843	-69.8985	-70.3379	-69.857	-70.4725	-70.4995	-70.1728
13.35	-69.869	-70.0116	-70.3347	-69.7943	-70.3587	-70.5164	-70.1918
13.4	-69.9025	-70.1413	-70.3095	-69.7679	-70.2542	-70.5821	-70.1831
13.45	-69.9703	-70.2589	-70.2633	-69.7811	-70.2337	-70.6854	-70.1303
13.5	-70.0207	-70.3126	-70.2106	-69.8293	-70.3205	-70.7684	-70.0718
13.55	-70.0573	-70.2679	-70.1849	-69.8648	-70.4644	-70.8158	-70.046
13.6	-70.0962	-70.1338	-70.2085	-69.8377	-70.5764	-70.8638	-70.0432
13.65	-70.1226	-69.9628	-70.2496	-69.7623	-70.6098	-70.9288	-70.0233
13.7	-70.1033	-69.8493	-70.2712	-69.7155	-70.6072	-70.9868	-70.0036
13.75	-70.0109	-69.8865	-70.2953	-69.7695	-70.6137	-70.9898	-70.038
13.8	-69.8874	-70.0846	-70.3741	-69.9301	-70.6273	-70.9129	-70.1271
13.85	-69.7902	-70.322	-70.4987	-70.1404	-70.6239	-70.7782	-70.2137
13.9	-69.7126	-70.4569	-70.5735	-70.3084	-70.5939	-70.66	-70.2607
13.95	-69.6706	-70.4412	-70.5214	-70.3603	-70.5665	-70.6045	-70.2838
14	-69.7144	-70.3295	-70.3757	-70.2542	-70.5647	-70.5855	-70.3151
14.05	-69.7917	-70.2272	-70.2342	-70.0562	-70.5948	-70.5629	-70.3857
14.1	-69.8086	-70.243	-70.1451	-69.9012	-70.6474	-70.5689	-70.4738
14.15	-69.7583	-70.4195	-70.1082	-69.8634	-70.6876	-70.628	-70.5176
14.2	-69.6726	-70.6518	-70.1216	-69.87	-70.6914	-70.6845	-70.4702
14.25	-69.5602	-70.7876	-70.1757	-69.8369	-70.6589	-70.6582	-70.3693
14.3	-69.418	-70.767	-70.2138	-69.777	-70.5962	-70.5761	-70.2653
14.35	-69.2743	-70.6266	-70.1885	-69.7388	-70.5076	-70.506	-70.1635
14.4	-69.2352	-70.4279	-70.1187	-69.7499	-70.3912	-70.4414	-70.0434
14.45	-69.3534	-70.2556	-70.0585	-69.8348	-70.2818	-70.3177	-69.9343
14.5	-69.5069	-70.2118	-70.0199	-69.9967	-70.2361	-70.1428	-69.8933
14.55	-69.5934	-70.3012	-69.9785	-70.1438	-70.2705	-69.9933	-69.9277
14.6	-69.6602	-70.4221	-69.9284	-70.1706	-70.3611	-69.9279	-70.0039
14.65	-69.735	-70.4596	-69.9123	-70.0742	-70.4654	-69.9456	-70.1079
14.7	-69.7717	-70.3923	-69.9604	-69.9579	-70.5569	-70.0138	-70.2424
14.75	-69.7679	-70.3064	-70.0411	-69.9003	-70.6217	-70.1143	-70.3615
14.8	-69.7407	-70.2814	-70.1292	-69.9061	-70.6256	-70.2208	-70.4221
14.85	-69.6846	-70.3104	-70.2496	-69.9748	-70.5644	-70.288	-70.4394
14.9	-69.6525	-70.343	-70.3989	-70.1086	-70.4737	-70.2905	-70.4579
14.95	-69.6948	-70.3663	-70.5108	-70.2659	-70.3471	-70.2733	-70.467
15	-69.7535	-70.3757	-70.5527	-70.3455	-70.182	-70.258	-70.4425
15.05	-69.784	-70.3607	-70.5557	-70.2873	-70.0571	-70.2137	-70.4347
15.1	-69.8228	-70.3742	-70.5321	-70.1394	-70.0656	-70.1235	-70.5022
15.15	-69.8507	-70.4621	-70.4534	-70.0002	-70.1877	-70.0176	-70.6002
15.2	-69.8207	-70.5556	-70.3449	-69.9317	-70.2943	-69.8888	-70.6219
15.25	-69.7833	-70.5321	-70.2899	-69.9323	-70.3114	-69.7345	-70.5453
15.3	-69.7901	-70.385	-70.3256	-69.9858	-70.2925	-69.6306	-70.4274
15.35	-69.8143	-70.2453	-70.3711	-70.0417	-70.3014	-69.649	-70.3004
15.4	-69.8464	-70.1818	-70.3532	-70.0234	-70.3514	-69.7676	-70.1306
15.45	-69.8858	-70.1287	-70.2843	-69.9028	-70.413	-69.9244	-69.9339
15.5	-69.8689	-70.0338	-70.2007	-69.7524	-70.4372	-70.094	-69.8328
15.55	-69.7957	-69.9705	-70.0911	-69.6604	-70.4504	-70.2294	-69.9018
15.6	-69.7798	-70.0178	-69.9901	-69.6283	-70.5258	-70.2654	-70.0793
15.65	-69.8368	-70.1126	-69.9804	-69.6262	-70.6521	-70.1904	-70.2384
15.7	-69.8611	-70.1493	-70.0719	-69.6497	-70.7639	-70.087	-70.3129
15.75	-69.8469	-70.1222	-70.1504	-69.6904	-70.8019	-70.0162	-70.2757
15.8	-69.8623	-70.0887	-70.1246	-69.7186	-70.7197	-69.9657	-70.1341
15.85	-69.8641	-70.0914	-70.0174	-69.7286	-70.5726	-69.9407	-69.9747
15.9	-69.7967	-70.1287	-69.9204	-69.7567	-70.5044	-69.973	-69.9034
15.95	-69.7329	-70.1771	-69.8906	-69.7914	-70.5751	-70.0613	-69.9358
16	-69.734	-70.1977	-69.9232	-69.7675	-70.708	-70.1468	-69.978
16.05	-69.7604	-70.1629	-69.9943	-69.6778	-70.7949	-70.181	-69.9626
16.1	-69.8074	-70.1086	-70.0973	-69.6073	-70.785	-70.1443	-69.9137
16.15	-69.9082	-70.0845	-70.2365	-69.6409	-70.7338	-70.0534	-69.8839
16.2	-70.0049	-70.091	-70.3795	-69.76	-70.7377	-69.9919	-69.9002
16.25	-70.0139	-70.1002	-70.4881	-69.8943	-70.8066	-70.0481	-69.961
16.3	-69.9684	-70.1114	-70.5386	-69.9923	-70.8883	-70.2177	-70.0388
16.35	-69.9386	-70.1407	-70.5392	-70.0335	-70.9333	-70.3859	-70.0687
16.4	-69.9255	-70.1426	-70.4983	-70.032	-70.926	-70.4781	-70.0156
16.45	-69.8542	-70.0831	-70.43	-69.9916	-70.8457	-70.5282	-69.9426
16.5	-69.6974	-70.0365	-70.353	-69.9075	-70.6959	-70.5896	-69.9303
16.55	-69.5624	-70.0737	-70.2968	-69.8188	-70.5556	-70.6368	-69.9953
16.6	-69.5663	-70.1604	-70.268	-69.8017	-70.5204	-70.6358	-70.0857
16.65	-69.7074	-70.2215	-70.2463	-69.8891	-70.574	-70.6065	-70.1445
16.7	-69.8977	-70.2414	-70.2431	-69.992	-70.6494	-70.5831	-70.1397
16.75	-70.0658	-70.25	-70.31	-70.0064	-70.7366	-70.5741	-70.0923
16.8	-70.1427	-70.2375	-70.4699	-69.9599	-70.8482	-70.5643	-70.0734
16.85	-70.0819	-70.1838	-70.6418	-69.9436	-70.9209	-70.554	-70.093
16.9	-69.9302	-70.1193	-70.7229	-69.9735	-70.9093	-70.5406	-70.0829
16.95	-69.8117	-70.0681	-70.6849	-69.9931	-70.8863	-70.5161	-70.0392
17	-69.7701	-70.0306	-70.5723	-69.9845	-70.9462	-70.481	-70.0567
17.05	-69.7571	-70.0117	-70.4204	-69.9767	-71.0522	-70.4404	-70.1853
17.1	-69.7472	-70.0017	-70.2509	-69.9538	-71.0874	-70.3876	-70.3185
17.15	-69.7622	-69.9996	-70.1247	-69.8981	-71.0114	-70.3046	-70.3342
17.2	-69.7862	-70.048	-70.1118	-69.8598	-70.8662	-70.2252	-70.2536
17.25	-69.7831	-70.1861	-70.218	-69.8852	-70.7153	-70.2273	-70.1587
17.3	-69.7565	-70.3739	-70.3571	-69.9442	-70.5919	-70.3329	-70.0765
17.35	-69.7336	-70.496	-70.4504	-69.973	-70.5249	-70.4787	-69.9791
17.4	-69.709	-70.4971	-70.4816	-69.9775	-70.5431	-70.5806	-69.8823
17.45	-69.6763	-70.438	-70.46	-70.0005	-70.6348	-70.6119	-69.8609
17.5	-69.6631	-70.3692	-70.4023	-69.9922	-70.723	-70.587	-69.9402
17.55	-69.6878	-70.2853	-70.3382	-69.8726	-70.7279	-70.4986	-70.07
17.6	-69.7201	-70.2032	-70.3128	-69.6936	-70.6336	-70.3542	-70.188
17.65	-69.7364	-70.1624	-70.3145	-69.5886	-70.447	-70.1999	-70.2704
17.7	-69.7615	-70.1792	-70.2918	-69.5987	-70.2066	-70.0772	-70.3233
17.75	-69.8293	-70.2215	-70.2342	-69.6583	-70.0012	-70.0182	-70.3345
17.8	-69.9322	-70.2343	-70.1887	-69.7435	-69.9394	-70.0269	-70.3136
17.85	-70.0363	-70.2453	-70.1881	-69.8715	-70.0224	-70.0854	-70.2967
17.9	-70.1008	-70.3299	-70.2003	-69.9707	-70.1602	-70.1864	-70.2822
17.95	-70.1014	-70.4432	-70.1985	-69.9612	-70.2772	-70.2748	-70.2408
18	-70.0337	-70.46	-70.1933	-69.8868	-70.376	-70.2636	-70.185
18.05	-69.933	-70.3562	-70.1762	-69.8366	-70.4664	-70.1624	-70.182
18.1	-69.8366	-70.2115	-70.1144	-69.8473	-70.5424	-70.0642	-70.2458
18.15	-69.7489	-70.1151	-70.0249	-69.904	-70.5872	-70.0209	-70.2781
18.2	-69.6514	-70.0964	-69.9896	-69.9587	-70.5964	-70.0181	-70.223
18.25	-69.5563	-70.1064	-70.0087	-69.9955	-70.5784	-70.0325	-70.1588
18.3	-69.5161	-70.1133	-69.9827	-70.0234	-70.5695	-70.0559	-70.1473
18.35	-69.5456	-70.1357	-69.8876	-70.0067	-70.5896	-70.0553	-70.1701
18.4	-69.6188	-70.1438	-69.8241	-69.9378	-70.6256	-69.9773	-70.2199
18.45	-69.7229	-70.1057	-69.8665	-69.8756	-70.6416	-69.8623	-70.3042
18.5	-69.8685	-70.0755	-69.9372	-69.8567	-70.6253	-69.8102	-70.3691
18.55	-70.0146	-70.084	-69.9437	-69.8686	-70.577	-69.8238	-70.3318
18.6	-70.0873	-70.1012	-69.9261	-69.8963	-70.5034	-69.833	-70.2016
18.65	-70.0854	-70.159	-69.9585	-69.9654	-70.4194	-69.8197	-70.0731
18.7	-70.0531	-70.2911	-70.0379	-70.079	-70.3538	-69.8527	-69.9693
18.75	-69.9983	-70.3949	-70.1081	-70.2034	-70.3277	-69.9732	-69.8567
18.8	-69.897	-70.3755	-70.1341	-70.3034	-70.3406	-70.1257	-69.7677
18.85	-69.7853	-70.2828	-70.1238	-70.3621	-70.3984	-70.2339	-69.7436
18.9	-69.7332	-70.1703	-70.0846	-70.3494	-70.512	-70.2357	-69.7408
18.95	-69.7555	-70.039	-70.0337	-70.2394	-70.6757	-70.1164	-69.7046
19	-69.8357	-69.9392	-70.0071	-70.0618	-70.8237	-69.9364	-69.667
19.05	-69.9396	-69.9244	-70.0531	-69.882	-70.8783	-69.8164	-69.7322
19.1	-70.0026	-69.9618	-70.2027	-69.7463	-70.8178	-69.8269	-69.9202
19.15	-69.9495	-69.9676	-70.3869	-69.6474	-70.7065	-69.9418	-70.0845
19.2	-69.7873	-69.901	-70.4712	-69.5862	-70.6035	-70.0921	-70.121
19.25	-69.6355	-69.8166	-70.4017	-69.5747	-70.5116	-70.2073	-70.0939
19.3	-69.6026	-69.8195	-70.2755	-69.6405	-70.411	-70.2499	-70.0454
19.35	-69.6861	-69.904	-70.2264	-69.8001	-70.3172	-70.2308	-69.9369
19.4	-69.7913	-69.9645	-70.2525	-70.0215	-70.2917	-70.2081	-69.8032
19.45	-69.8653	-69.9684	-70.2778	-70.2166	-70.387	-70.2164	-69.757
19.5	-69.9421	-69.9811	-70.3039	-70.3045	-70.602	-70.2444	-69.8728
19.55	-69.9995	-70.0645	-70.3435	-70.2911	-70.854	-70.2679	-70.0765
19.6	-69.9433	-70.1953	-70.3587	-70.2253	-71.0314	-70.2951	-70.2181
19.65	-69.7635	-70.3171	-70.3504	-70.1601	-71.0485	-70.3372	-70.1854
19.7	-69.5864	-70.4005	-70.3766	-70.1378	-70.9373	-70.3695	-69.9948
19.75	-69.5233	-70.4671	-70.4573	-70.185	-70.8012	-70.3468	-69.7714
19.8	-69.5477	-70.5453	-70.4911	-70.2819	-70.6974	-70.2554	-69.6651
19.85	-69.5797	-70.6406	-70.3984	-70.3456	-70.5955	-70.1583	-69.7267
19.9	-69.5808	-70.7007	-70.2406	-70.3174	-70.5007	-70.1183	-69.8954
19.95	-69.5539	-70.6672	-70.1335	-70.2156	-70.5018	-70.1522	-70.0605
20	-69.5267	-70.5555	-70.1234	-70.118	-70.6312	-70.2355	-70.1527
20.05	-69.5091	-70.4224	-70.1972	-70.0732	-70.8047	-70.3358	-70.152
20.1	-69.4873	-70.2921	-70.3296	-70.0859	-70.9024	-70.4141	-70.084
20.15	-69.4341	-70.1772	-70.4857	-70.1485	-70.8965	-70.4599	-70.0127
20.2	-69.3687	-70.1258	-70.5757	-70.2534	-70.8072	-70.4905	-69.9935
20.25	-69.3894	-70.1408	-70.5282	-70.3652	-70.6496	-70.495	-70.0224
20.3	-69.5245	-70.1699	-70.3799	-70.43	-70.4536	-70.4255	-70.0473
20.35	-69.6518	-70.1746	-70.2717	-70.4323	-70.2977	-70.2561	-70.0506
20.4	-69.6577	-70.1717	-70.2815	-70.3893	-70.2435	-70.06	-70.0477
20.45	-69.5973	-70.1482	-70.3534	-70.2925	-70.2658	-69.9396	-70.0528
20.5	-69.5969	-70.0731	-70.4067	-70.1142	-70.3215	-69.9184	-70.0585
20.55	-69.6494	-69.9713	-70.4257	-69.9098	-70.3998	-69.9205	-70.0891
20.6	-69.666	-69.9483	-70.413	-69.7918	-70.4704	-69.8908	-70.171
20.65	-69.6422	-70.0691	-70.3454	-69.8043	-70.4592	-69.8511	-70.2862
20.7	-69.6223	-70.2852	-70.2523	-69.8834	-70.3494	-69.8572	-70.3907
20.75	-69.6106	-70.4799	-70.2168	-69.9684	-70.2344	-69.9221	-70.4522
20.8	-69.5819	-70.5745	-70.264	-70.0493	-70.2007	-70.0329	-70.4559
20.85	-69.5411	-70.5661	-70.3392	-70.1102	-70.2596	-70.1809	-70.379
20.9	-69.5363	-70.5093	-70.3882	-70.1028	-70.3656	-70.3172	-70.2324
20.95	-69.5809	-70.4622	-70.4096	-70.0246	-70.4614	-70.3553	-70.0856
21	-69.6428	-70.4578	-70.409	-69.9528	-70.4991	-70.2632	-70.0291
21.05	-69.6857	-70.507	-70.3759	-69.9401	-70.4866	-70.1035	-70.0613
21.1	-69.7049	-70.5826	-70.3088	-69.966	-70.4973	-69.9405	-70.1187
21.15	-69.7348	-70.6076	-70.1874	-70.003	-70.5559	-69.8249	-70.1847
21.2	-69.797	-70.5361	-70.0039	-70.0743	-70.6094	-69.8026	-70.2878
21.25	-69.8785	-70.3915	-69.8227	-70.1726	-70.606	-69.8848	-70.3833
21.3	-69.9472	-70.2298	-69.7737	-70.2309	-70.5764	-69.9934	-70.391
21.35	-69.9477	-70.0846	-69.8976	-70.1962	-70.584	-70.0546	-70.3139
21.4	-69.871	-69.9889	-70.0524	-70.1078	-70.6343	-70.0564	-70.2364
21.45	-69.7694	-69.9502	-70.0957	-70.0108	-70.6914	-70.0183	-70.2017
21.5	-69.6779	-69.918	-70.0377	-69.9162	-70.7065	-69.9314	-70.1979
21.55	-69.6162	-69.8392	-69.9886	-69.8299	-70.6573	-69.8135	-70.2183
21.6	-69.6236	-69.7654	-70.0161	-69.7659	-70.5929	-69.7334	-70.2781
21.65	-69.7027	-69.814	-70.1021	-69.6837	-70.604	-69.7631	-70.344
21.7	-69.7924	-69.9991	-70.2096	-69.5564	-70.7255	-69.8854	-70.3424
21.75	-69.8075	-70.2159	-70.3082	-69.4393	-70.8422	-70.0207	-70.243
21.8	-69.7408	-70.3515	-70.3941	-69.3954	-70.8125	-70.1005	-70.1271
21.85	-69.6773	-70.3849	-70.4584	-69.3847	-70.6672	-70.1232	-70.0924
21.9	-69.6738	-70.3269	-70.4725	-69.3424	-70.5697	-70.1238	-70.1527
21.95	-69.7094	-70.1844	-70.4075	-69.2844	-70.6059	-70.153	-70.2412
22	-69.7521	-69.9938	-70.3165	-69.2733	-70.6757	-70.2236	-70.3119
22.05	-69.7788	-69.8407	-70.285	-69.3403	-70.6654	-70.2967	-70.3392
22.1	-69.791	-69.8027	-70.3319	-69.4775	-70.6134	-70.3164	-70.3023
22.15	-69.8089	-69.8682	-70.3794	-69.6667	-70.5968	-70.2946	-70.1989
22.2	-69.8295	-69.9769	-70.3615	-69.8484	-70.6037	-70.2798	-70.0633
22.25	-69.8597	-70.0513	-70.2958	-69.968	-70.5758	-70.2924	-69.9129
22.3	-69.8914	-70.0383	-70.2583	-70.032	-70.5236	-70.3075	-69.7606
22.35	-69.8565	-69.9539	-70.2993	-70.1053	-70.5108	-70.3166	-69.6588
22.4	-69.7482	-69.8814	-70.4183	-70.1902	-70.547	-70.3073	-69.6731
22.45	-69.6448	-69.8841	-70.5552	-70.2158	-70.5877	-70.2592	-69.8047
22.5	-69.5589	-69.947	-70.6366	-70.1384	-70.5898	-70.1652	-69.9728
22.55	-69.4815	-70.0365	-70.6369	-70	-70.5274	-70.0686	-70.096
22.6	-69.4706	-70.1116	-70.5994	-69.87	-70.4197	-69.9996	-70.1297
22.65	-69.5442	-70.1213	-70.5744	-69.8027	-70.3114	-69.9448	-70.1038
22.7	-69.6266	-70.0592	-70.5829	-69.8374	-70.2541	-69.8831	-70.0801
22.75	-69.6522	-70.0074	-70.5975	-69.9526	-70.2718	-69.8643	-70.0931
22.8	-69.6191	-70.062	-70.5782	-70.0693	-70.3252	-69.958	-70.1001
22.85	-69.5742	-70.2032	-70.5262	-70.1156	-70.3652	-70.1381	-70.0459
22.9	-69.5613	-70.3238	-70.5032	-70.1113	-70.3934	-70.2882	-69.9161
22.95	-69.5392	-70.3458	-70.5351	-70.1024	-70.431	-70.3343	-69.7654
23	-69.4671	-70.2793	-70.5896	-70.0915	-70.4719	-70.3133	-69.6771
23.05	-69.4189	-70.1816	-70.6291	-70.0672	-70.5022	-70.2869	-69.7001
23.1	-69.4432	-70.1156	-70.6517	-70.0664	-70.5429	-70.2808	-69.8214
23.15	-69.456	-70.1434	-70.6336	-70.1244	-70.6025	-70.3074	-69.968
23.2	-69.4265	-70.2678	-70.5451	-70.1901	-70.632	-70.3998	-70.0604
23.25	-69.4276	-70.4105	-70.418	-70.1926	-70.6145	-70.5399	-70.0527
23.3	-69.452	-70.462	-70.3456	-70.135	-70.5972	-70.6519	-69.9854
23.35	-69.4494	-70.3957	-70.3365	-70.0872	-70.6017	-70.6687	-69.9248
23.4	-69.4525	-70.3027	-70.3219	-70.055	-70.5919	-70.621	-69.9
23.45	-69.4825	-70.289	-70.2655	-69.9743	-70.5417	-70.5734	-69.8928
23.5	-69.5164	-70.3647	-70.213	-69.8467	-70.4833	-70.5334	-69.901
23.55	-69.5844	-70.4405	-70.1745	-69.783	-70.464	-70.4931	-69.9541
23.6	-69.6977	-70.436	-70.1012	-69.8599	-70.4841	-70.4847	-70.0543
23.65	-69.7745	-70.3472	-69.9831	-69.9873	-70.5378	-70.522	-70.1629
23.7	-69.7996	-70.2133	-69.8957	-70.0319	-70.6108	-70.5479	-70.2535
23.75	-69.8656	-70.1048	-69.8883	-69.9727	-70.6334	-70.5414	-70.338
23.8	-69.9742	-70.0564	-69.9149	-69.8848	-70.5835	-70.5292	-70.3933
23.85	-70.0478	-70.0223	-69.9192	-69.8331	-70.5274	-70.4927	-70.3702
23.9	-70.0837	-69.9704	-69.9105	-69.8348	-70.4891	-70.3713	-70.2675
23.95	-70.0898	-69.9677	-69.9103	-69.8842	-70.4767	-70.1841	-70.143
24	-70.0071	-70.0889	-69.9129	-69.9149	-70.5384	-70.0082	-70.0536
24.05	-69.8514	-70.2548	-69.9313	-69.8634	-70.6616	-69.8781	-70.0214
24.1	-69.7372	-70.3291	-69.9811	-69.7929	-70.76	-69.8076	-70.0525
24.15	-69.7088	-70.3193	-70.0541	-69.84	-70.7785	-69.8186	-70.1009
24.2	-69.7317	-70.3261	-70.1298	-70.0038	-70.726	-69.9186	-70.0919
24.25	-69.795	-70.3489	-70.2226	-70.108	-70.6492	-70.0338	-70.0093
24.3	-69.8582	-70.272	-70.3283	-70.0436	-70.5707	-70.0556	-69.9408
24.35	-69.853	-70.0731	-70.4158	-69.8937	-70.4651	-69.9564	-69.9951
24.4	-69.8167	-69.9058	-70.4466	-69.7897	-70.3647	-69.8229	-70.1551
24.45	-69.8264	-69.8966	-70.4163	-69.7806	-70.3709	-69.7539	-70.2997
24.5	-69.8462	-69.9924	-70.3205	-69.8319	-70.48	-69.7734	-70.3153
24.55	-69.8213	-70.0523	-70.173	-69.897	-70.5909	-69.884	-70.1971
24.6	-69.7946	-70.0357	-70.0119	-69.9353	-70.6495	-70.0652	-70.0309
24.65	-69.7738	-70.0191	-69.8746	-69.9361	-70.6722	-70.2519	-69.9189
24.7	-69.7033	-70.0389	-69.7666	-69.9405	-70.6994	-70.3556	-69.9257
24.75	-69.6063	-70.0622	-69.6902	-69.9757	-70.741	-70.3382	-70.006
24.8	-69.5878	-70.072	-69.6964	-70.0174	-70.795	-70.2185	-70.0412
24.85	-69.6937	-70.0742	-69.8258	-70.0152	-70.8498	-70.0829	-69.9676
24.9	-69.8193	-70.0618	-70.0451	-69.9657	-70.8917	-70.0282	-69.8548
24.95	-69.8621	-70.0225	-70.2606	-69.9468	-70.917	-70.0952	-69.8262
25	-69.8389	-69.9812	-70.4109	-70.0127	-70.9539	-70.2108	-69.878
25.05	-69.8088	-69.9959	-70.4571	-70.1269	-71.0201	-70.279	-69.9008
25.1	-69.7735	-70.0671	-70.3777	-70.2205	-71.0851	-70.2901	-69.8412
25.15	-69.7425	-70.1449	-70.2159	-70.2754	-71.0829	-70.3025	-69.7591
25.2	-69.7338	-70.2086	-70.1063	-70.3243	-70.9889	-70.3349	-69.7415
25.25	-69.7326	-70.2892	-70.1691	-70.3657	-70.8451	-70.3274	-69.8052
25.3	-69.7001	-70.4141	-70.3838	-70.3593	-70.6927	-70.2588	-69.9185
25.35	-69.6485	-70.53	-70.6239	-70.2775	-70.5551	-70.1871	-70.0191
25.4	-69.6156	-70.5515	-70.7852	-70.1326	-70.4607	-70.1543	-70.0319
25.45	-69.6089	-70.4888	-70.8621	-69.9964	-70.4569	-70.1361	-69.9566
25.5	-69.6	-70.4288	-70.8552	-69.9338	-70.5335	-70.0917	-69.8626
25.55	-69.6047	-70.4212	-70.7323	-69.9369	-70.6322	-70.0331	-69.7991
25.6	-69.6613	-70.4328	-70.5048	-69.9615	-70.7148	-69.999	-69.7712
25.65	-69.7518	-70.4066	-70.2849	-69.9705	-70.7698	-69.9948	-69.7983
25.7	-69.7988	-70.3527	-70.2052	-69.9515	-70.7603	-70.0126	-69.9261
25.75	-69.7833	-70.3138	-70.2935	-69.9062	-70.64	-70.0591	-70.1118
25.8	-69.7531	-70.2905	-70.4756	-69.8601	-70.4521	-70.1378	-70.2484
25.85	-69.7501	-70.2856	-70.6328	-69.8659	-70.2847	-70.2094	-70.2989
25.9	-69.7674	-70.3117	-70.6686	-69.9242	-70.1665	-70.2165	-70.3051
25.95	-69.7992	-70.3335	-70.5635	-69.9847	-70.0695	-70.156	-70.312
26	-69.8312	-70.3119	-70.4145	-70.0356	-70.0338	-70.052	-70.3146
26.05	-69.8375	-70.2412	-70.3676	-70.1015	-70.1298	-69.9264	-70.2883
26.1	-69.8004	-70.1546	-70.4307	-70.1875	-70.3241	-69.8475	-70.2327
26.15	-69.7443	-70.1391	-70.4665	-70.2664	-70.4841	-69.8748	-70.1487
26.2	-69.6774	-70.2287	-70.3611	-70.2901	-70.5434	-69.9896	-70.0558
26.25	-69.5785	-70.3278	-70.137	-70.2674	-70.5603	-70.1431	-70.0059
26.3	-69.446	-70.3441	-69.9037	-70.2585	-70.5951	-70.2751	-70.017
26.35	-69.3226	-70.2755	-69.7698	-70.287	-70.6203	-70.3357	-70.0404
26.4	-69.2467	-70.1452	-69.8038	-70.315	-70.6055	-70.3279	-70.0079
26.45	-69.2291	-69.9954	-69.9608	-70.2928	-70.5934	-70.2514	-69.9391
26.5	-69.2877	-69.8754	-70.1012	-70.2147	-70.6312	-70.1049	-69.9188
26.55	-69.4293	-69.7983	-70.1432	-70.1086	-70.6966	-69.9774	-69.9593
26.6	-69.625	-69.7931	-70.1309	-69.9857	-70.7484	-69.954	-70.0136
26.65	-69.8106	-69.8941	-70.1367	-69.8728	-70.7822	-70.0003	-70.0961
26.7	-69.9306	-70.0692	-70.1495	-69.8264	-70.8135	-70.0505	-70.2363
26.75	-69.9351	-70.2559	-70.1362	-69.8118	-70.8466	-70.0988	-70.3878
26.8	-69.8146	-70.3772	-70.1312	-69.7549	-70.8849	-70.1563	-70.4585
26.85	-69.6544	-70.3479	-70.1761	-69.6826	-70.9189	-70.187	-70.4279
26.9	-69.5824	-70.2074	-70.2801	-69.6955	-70.9466	-70.1496	-70.3675
26.95	-69.6517	-70.0928	-70.4199	-69.8339	-70.9567	-70.0738	-70.3175
27	-69.7914	-70.0337	-70.5537	-70.0205	-70.9398	-69.9929	-70.2539
27.05	-69.9085	-69.9905	-70.6273	-70.1593	-70.8864	-69.9158	-70.1652
27.1	-69.9675	-70.0099	-70.6142	-70.2132	-70.8164	-69.8522	-70.0571
27.15	-69.975	-70.1075	-70.57	-70.1838	-70.75	-69.8145	-69.9614
27.2	-69.9607	-70.1819	-70.5374	-70.0751	-70.6878	-69.8016	-69.9104
27.25	-69.9454	-70.1689	-70.4841	-69.9272	-70.5984	-69.7766	-69.8868
27.3	-69.9429	-70.1043	-70.4123	-69.8074	-70.4749	-69.7446	-69.883
27.35	-69.9497	-70.0255	-70.3917	-69.7274	-70.3715	-69.7572	-69.91
27.4	-69.9553	-69.9682	-70.4469	-69.643	-70.3509	-69.847	-69.9307
27.45	-69.9667	-69.9719	-70.5096	-69.5349	-70.4151	-69.9941	-69.9169
27.5	-69.9865	-70.0027	-70.5373	-69.4484	-70.5121	-70.1584	-69.8929
27.55	-69.999	-70.0111	-70.5677	-69.399	-70.6083	-70.2873	-69.8542
27.6	-69.9378	-70.0287	-70.5983	-69.3863	-70.678	-70.3189	-69.7861
27.65	-69.7711	-70.0735	-70.5801	-69.462	-70.7037	-70.2382	-69.7323
27.7	-69.5901	-70.0971	-70.5146	-69.6744	-70.6876	-70.0948	-69.72
27.75	-69.5137	-70.0476	-70.4433	-69.9354	-70.6688	-69.9665	-69.7171
27.8	-69.5414	-69.967	-70.3846	-70.0661	-70.6524	-69.8939	-69.6774
27.85	-69.5542	-69.9726	-70.3203	-70.0049	-70.6097	-69.8908	-69.6363
27.9	-69.5027	-70.1119	-70.2527	-69.8474	-70.5312	-69.961	-69.6909
27.95	-69.4659	-70.2916	-70.2375	-69.749	-70.4598	-70.0892	-69.8347
28	-69.4906	-70.3779	-70.2747	-69.7896	-70.4489	-70.228	-69.9575
28.05	-69.5347	-70.3431	-70.2891	-69.9304	-70.501	-70.3171	-70.0074
28.1	-69.5476	-70.2718	-70.2362	-70.0642	-70.5783	-70.3326	-70.0293
28.15	-69.5368	-70.2476	-70.1588	-70.086	-70.6427	-70.274	-70.0453
28.2	-69.5235	-70.2751	-70.1493	-69.9761	-70.6949	-70.172	-70.0428
28.25	-69.5078	-70.3124	-70.2172	-69.8094	-70.7206	-70.0724	-70.0253
28.3	-69.5129	-70.32	-70.2999	-69.7146	-70.689	-70.0165	-69.9901
28.35	-69.5347	-70.2645	-70.3506	-69.7781	-70.6039	-69.9977	-69.9129
28.4	-69.5034	-70.1417	-70.3903	-69.986	-70.5362	-70.003	-69.7807
28.45	-69.3951	-69.982	-70.4335	-70.2192	-70.5505	-70.0491	-69.6269
28.5	-69.3066	-69.8348	-70.457	-70.3283	-70.6277	-70.1537	-69.4805
28.55	-69.3412	-69.7187	-70.4367	-70.2585	-70.7174	-70.2825	-69.3726
28.6	-69.4454	-69.6557	-70.4004	-70.095	-70.7914	-70.342	-69.3358
28.65	-69.4978	-69.6737	-70.3799	-69.9767	-70.8392	-70.2904	-69.3954
28.7	-69.4912	-69.7721	-70.3614	-69.9392	-70.8318	-70.1926	-69.5379
28.75	-69.4783	-69.8939	-70.3324	-69.9201	-70.7736	-70.1785	-69.7008
28.8	-69.456	-69.9974	-70.3028	-69.8709	-70.7064	-70.2894	-69.8203
28.85	-69.3876	-70.0946	-70.2834	-69.8193	-70.6357	-70.4756	-69.8581
28.9	-69.2953	-70.2071	-70.266	-69.7911	-70.5445	-70.6598	-69.8102
28.95	-69.2482	-70.2987	-70.2607	-69.7779	-70.4725	-70.782	-69.7021
29	-69.2839	-70.3053	-70.2741	-69.7871	-70.5051	-70.8002	-69.6137
29.05	-69.4137	-70.2275	-70.2573	-69.8578	-70.6106	-70.7356	-69.6255
29.1	-69.6214	-70.1263	-70.1717	-69.9662	-70.6237	-70.6573	-69.7376
29.15	-69.8326	-70.0491	-70.0481	-70.0234	-70.4327	-70.5881	-69.8766
29.2	-69.9755	-70.0166	-69.9659	-69.9856	-70.1383	-70.5047	-69.9766
29.25	-70.0366	-70.045	-69.9678	-69.915	-69.9633	-70.4211	-70.0081
29.3	-70.0465	-70.1206	-70.0188	-69.8737	-70.0166	-70.3832	-69.946
29.35	-70.0334	-70.19	-70.058	-69.8665	-70.2353	-70.3478	-69.8235
29.4	-69.9992	-70.2016	-70.0406	-69.8834	-70.461	-70.2308	-69.7387
29.45	-69.9665	-70.1407	-69.9859	-69.9242	-70.5614	-70.0503	-69.778
29.5	-69.9503	-70.0423	-69.9558	-69.9878	-70.521	-69.94	-69.9004
29.55	-69.9284	-69.9269	-69.9741	-70.0812	-70.4467	-69.9373	-69.9972
29.6	-69.9081	-69.8069	-70.0064	-70.2101	-70.4572	-69.9473	-69.9989
29.65	-69.9334	-69.731	-70.0114	-70.3385	-70.5434	-69.9202	-69.9156
29.7	-69.9924	-69.7783	-70.0094	-70.4024	-70.6123	-69.944	-69.7842
29.75	-70.009	-69.9082	-70.0488	-70.3587	-70.6074	-70.0464	-69.6635
29.8	-69.9346	-69.9773	-70.1293	-70.2368	-70.545	-70.1369	-69.619
29.85	-69.8347	-69.9174	-70.1988	-70.1151	-70.4936	-70.1481	-69.6763
29.9	-69.7973	-69.8126	-70.2021	-70.0524	-70.4914	-70.12	-69.7744
29.95	-69.8003	-69.753	-70.1694	-70.0283	-70.4986	-70.0917	-69.8462
30	-69.7881	-69.7275	-70.1815	-70.0078	-70.4372	-70.06	-69.8844
30.05	-69.7732	-69.7111	-70.2806	-69.9758	-70.3064	-70.0408	-69.9208
30.1	-69.7901	-69.7203	-70.4263	-69.9126	-70.2136	-70.0874	-69.9371
30.15	-69.8459	-69.7648	-70.5406	-69.7872	-70.2312	-70.1878	-69.8806
30.2	-69.9058	-69.7918	-70.5704	-69.6251	-70.3232	-70.2682	-69.7327
30.25	-69.9134	-69.7601	-70.5253	-69.4876	-70.4039	-70.2912	-69.5496
30.3	-69.8541	-69.6773	-70.477	-69.3932	-70.4424	-70.271	-69.3944
30.35	-69.7481	-69.5762	-70.4754	-69.3218	-70.4826	-70.2204	-69.2937
30.4	-69.6298	-69.4887	-70.4839	-69.2898	-70.5537	-70.1641	-69.2695
30.45	-69.5409	-69.4593	-70.4212	-69.3482	-70.6345	-70.1432	-69.3576
30.5	-69.4911	-69.5307	-70.2776	-69.4908	-70.6828	-70.1711	-69.5388
30.55	-69.4587	-69.6889	-70.1193	-69.6682	-70.6963	-70.219	-69.7162
30.6	-69.4305	-69.8861	-70.025	-69.8451	-70.7316	-70.2788	-69.8292
30.65	-69.4022	-70.0503	-70.0163	-70.0185	-70.806	-70.3527	-69.8997
30.7	-69.4062	-70.1109	-70.0674	-70.1631	-70.8806	-70.399	-69.9563
30.75	-69.4672	-70.0619	-70.1227	-70.2604	-70.9178	-70.3709	-69.9845
30.8	-69.5095	-69.9905	-70.1461	-70.3148	-70.9071	-70.3082	-69.9944
30.85	-69.46	-70.0048	-70.1265	-70.3352	-70.8644	-70.2826	-70.001
30.9	-69.3645	-70.0942	-70.0942	-70.2927	-70.8102	-70.3047	-69.9725
30.95	-69.2805	-70.1553	-70.0828	-70.1741	-70.7665	-70.3232	-69.8487
31	-69.2114	-70.1327	-70.0979	-70.0209	-70.7497	-70.3139	-69.6611
31.05	-69.1805	-70.0858	-70.1082	-69.8899	-70.7215	-70.2787	-69.5145
31.1	-69.2027	-70.0987	-70.1002	-69.8244	-70.6303	-70.2168	-69.4641
31.15	-69.2324	-70.1694	-70.0929	-69.8385	-70.4921	-70.1112	-69.4623
31.2	-69.2474	-70.2486	-70.0995	-69.9051	-70.3829	-69.9783	-69.4485
31.25	-69.2581	-70.3039	-70.0896	-69.9535	-70.3552	-69.8589	-69.4439
31.3	-69.2426	-70.321	-70.0529	-69.9625	-70.3628	-69.7765	-69.5229
31.35	-69.1958	-70.2694	-70.0239	-69.9685	-70.3326	-69.7237	-69.7239
31.4	-69.1604	-70.1506	-70.0237	-69.9937	-70.2503	-69.7026	-69.9714
31.45	-69.1618	-70.0437	-70.0081	-70.0065	-70.1403	-69.7266	-70.1349
31.5	-69.2217	-70.0261	-69.9385	-69.9786	-70.0513	-69.7948	-70.1394
31.55	-69.3478	-70.0955	-69.8496	-69.9601	-70.0385	-69.9007	-70.0378
31.6	-69.4714	-70.1723	-69.8014	-70.0392	-70.0867	-70.0477	-69.93
31.65	-69.5458	-70.1838	-69.7919	-70.2435	-70.1277	-70.2478	-69.8656
31.7	-69.616	-70.1253	-69.8028	-70.4618	-70.1295	-70.4478	-69.8338
31.75	-69.6974	-70.0547	-69.8643	-70.5532	-70.1313	-70.5678	-69.8308
31.8	-69.7524	-70.0551	-69.9978	-70.4778	-70.1643	-70.5903	-69.8749
31.85	-69.8138	-70.1269	-70.1359	-70.3064	-70.1999	-70.6005	-69.9396
31.9	-69.9046	-70.1741	-70.1997	-70.1487	-70.2342	-70.6523	-69.9825
31.95	-69.922	-70.1112	-70.2102	-70.0783	-70.305	-70.6939	-70.0026
32	-69.8226	-69.9726	-70.236	-70.1035	-70.3691	-70.6662	-70.0286
32.05	-69.7191	-69.8964	-70.2951	-70.1689	-70.3601	-70.5947	-70.0327
32.1	-69.6417	-69.9431	-70.3597	-70.2104	-70.3009	-70.5271	-69.969
32.15	-69.5061	-70.0324	-70.4096	-70.1874	-70.2454	-70.4633	-69.8713
32.2	-69.3666	-70.0751	-70.4123	-70.1064	-70.2083	-70.4219	-69.8249
32.25	-69.3576	-70.0828	-70.356	-70.031	-70.1795	-70.4347	-69.8617
32.3	-69.4383	-70.1115	-70.2942	-70.0145	-70.1646	-70.4728	-69.9271
32.35	-69.5067	-70.149	-70.3018	-70.045	-70.2125	-70.4324	-69.9802
32.4	-69.6058	-70.159	-70.3617	-70.0544	-70.3252	-70.2731	-70.0032
32.45	-69.7619	-70.1398	-70.4113	-70.0023	-70.4006	-70.0728	-69.9673
32.5	-69.8616	-70.1104	-70.4371	-69.9345	-70.3859	-69.9226	-69.8558
32.55	-69.8492	-70.1089	-70.4591	-69.9488	-70.3272	-69.8527	-69.7348
32.6	-69.806	-70.1522	-70.4492	-70.0888	-70.2639	-69.8627	-69.7187
32.65	-69.7743	-70.2184	-70.3819	-70.2483	-70.2331	-69.9521	-69.8192
32.7	-69.7318	-70.2617	-70.2716	-70.2896	-70.2704	-70.0613	-69.947
32.75	-69.6882	-70.2441	-70.1443	-70.1945	-70.3082	-70.11	-70.02
32.8	-69.6618	-70.1669	-70.0158	-70.0455	-70.2731	-70.0824	-70.0324
32.85	-69.6342	-70.0426	-69.9219	-69.9159	-70.2279	-70.0382	-70.0246
32.9	-69.5818	-69.8756	-69.9079	-69.7985	-70.2704	-70.0266	-70.0264
32.95	-69.4986	-69.697	-69.9651	-69.6682	-70.3974	-70.0519	-70.0577
33	-69.4285	-69.5672	-70.0513	-69.5554	-70.489	-70.1287	-70.1097
33.05	-69.4458	-69.5501	-70.1526	-69.5061	-70.4583	-70.2461	-70.1377
33.1	-69.5376	-69.6451	-70.2608	-69.5216	-70.3325	-70.3391	-70.0854
33.15	-69.6189	-69.785	-70.3051	-69.5524	-70.1965	-70.352	-69.9544
33.2	-69.6191	-69.9225	-70.2531	-69.5602	-70.1185	-70.3199	-69.8313
33.25	-69.546	-70.0363	-70.179	-69.5465	-70.1347	-70.2911	-69.7826
33.3	-69.4651	-70.1233	-70.1646	-69.5311	-70.2032	-70.2719	-69.7929
33.35	-69.4326	-70.1825	-70.1592	-69.5547	-70.245	-70.2464	-69.8079
33.4	-69.4636	-70.1913	-70.0822	-69.6214	-70.2449	-70.2046	-69.8098
33.45	-69.5482	-70.1238	-69.9709	-69.6712	-70.2867	-70.1363	-69.7989
33.5	-69.6458	-69.9865	-69.9425	-69.6592	-70.3953	-70.0394	-69.769
33.55	-69.6982	-69.8258	-70.0589	-69.6197	-70.4863	-69.9555	-69.7595
33.6	-69.7041	-69.7168	-70.2661	-69.5999	-70.4893	-69.9271	-69.8299
33.65	-69.7208	-69.6948	-70.4683	-69.5818	-70.4666	-69.9373	-69.9666
33.7	-69.7719	-69.7474	-70.5918	-69.5485	-70.5074	-69.9374	-70.092
33.75	-69.8213	-69.8436	-70.6205	-69.5518	-70.6054	-69.9107	-70.1485
33.8	-69.8516	-69.9374	-70.5676	-69.5987	-70.6872	-69.8982	-70.1222
33.85	-69.8837	-69.9816	-70.4724	-69.6227	-70.7085	-69.9436	-69.9939
33.9	-69.9145	-69.9473	-70.4001	-69.5953	-70.6805	-70.0421	-69.7808
33.95	-69.9061	-69.8506	-70.3971	-69.5737	-70.6153	-70.1548	-69.602
34	-69.8419	-69.7686	-70.4523	-69.6124	-70.5313	-70.2435	-69.5655
34.05	-69.7436	-69.7557	-70.4982	-69.6916	-70.47	-70.291	-69.6548
34.1	-69.6194	-69.7884	-70.505	-69.7801	-70.4814	-70.2929	-69.7653
34.15	-69.4783	-69.8565	-70.4818	-69.8844	-70.536	-70.2625	-69.835
34.2	-69.3773	-69.9532	-70.4269	-69.9893	-70.5502	-70.2313	-69.8841
34.25	-69.373	-70.0255	-70.3442	-70.0627	-70.4993	-70.1866	-69.9086
34.3	-69.4283	-70.0562	-70.2975	-70.0937	-70.4466	-70.1128	-69.8682
34.35	-69.4504	-70.0835	-70.3375	-70.0592	-70.4207	-70.0838	-69.79
34.4	-69.395	-70.1247	-70.4031	-69.945	-70.3722	-70.1464	-69.7668
34.45	-69.2714	-70.1638	-70.415	-69.8129	-70.2961	-70.235	-69.8347
34.5	-69.1182	-70.1723	-70.3822	-69.7884	-70.2482	-70.2833	-69.9102
34.55	-69.0284	-70.142	-70.3464	-69.9073	-70.2425	-70.3144	-69.9191
34.6	-69.1205	-70.1133	-70.3187	-70.0362	-70.2067	-70.3903	-69.8825
34.65	-69.3896	-70.0965	-70.3123	-70.0574	-70.109	-70.5152	-69.8343
34.7	-69.7204	-70.0431	-70.3612	-70.0355	-70.0006	-70.6158	-69.8013
34.75	-69.9975	-69.9527	-70.4099	-70.0836	-69.9322	-70.6582	-69.8288
34.8	-70.1558	-69.8792	-70.3469	-70.1995	-69.8914	-70.6719	-69.9238
34.85	-70.1468	-69.8359	-70.1845	-70.2911	-69.873	-70.6599	-70.0092
34.9	-69.9974	-69.8182	-70.0753	-70.2899	-69.8841	-70.5957	-70.0026
34.95	-69.8229	-69.8293	-70.1276	-70.2289	-69.8999	-70.4774	-69.9207
35	-69.7077	-69.855	-70.2719	-70.1796	-69.8819	-70.3482	-69.8372
35.05	-69.6396	-69.883	-70.3799	-70.1541	-69.8487	-70.2939	-69.779
35.1	-69.5957	-69.9073	-70.4014	-70.141	-69.8521	-70.3346	-69.7472
35.15	-69.6343	-69.9219	-70.3449	-70.1196	-69.8977	-70.3795	-69.7408
35.2	-69.7909	-69.9748	-70.2248	-70.0627	-69.9581	-70.3496	-69.7174
35.25	-69.9826	-70.0839	-70.0502	-69.9771	-70.0562	-70.2147	-69.6637
35.3	-70.089	-70.1427	-69.8647	-69.9221	-70.2367	-70.0161	-69.6431
35.35	-70.0765	-70.0935	-69.7375	-69.9681	-70.4622	-69.8724	-69.689
35.4	-69.9883	-70.0222	-69.706	-70.0879	-70.6571	-69.8727	-69.7598
35.45	-69.8482	-69.9581	-69.7698	-70.1684	-70.7894	-69.9669	-69.8084
35.5	-69.684	-69.8452	-69.8711	-70.1478	-70.8663	-70.0157	-69.835
35.55	-69.5546	-69.7138	-69.9529	-70.0741	-70.8504	-69.9908	-69.8687
35.6	-69.4924	-69.6432	-70.0333	-69.9904	-70.7015	-69.9792	-69.9008
35.65	-69.4842	-69.6326	-70.1397	-69.8455	-70.47	-70.0318	-69.9134
35.7	-69.522	-69.6598	-70.2264	-69.6178	-70.2846	-70.1036	-69.9326
35.75	-69.6417	-69.7265	-70.2328	-69.4146	-70.2013	-70.1491	-69.9683
35.8	-69.8369	-69.7968	-70.2004	-69.3715	-70.1799	-70.1754	-69.9905
35.85	-70.0074	-69.8271	-70.2271	-69.484	-70.1735	-70.1779	-70.0016
35.9	-70.0501	-69.827	-70.3152	-69.6515	-70.1669	-70.1264	-70.036
35.95	-69.9725	-69.8106	-70.3999	-69.7877	-70.186	-70.0224	-70.1072
36	-69.8898	-69.7854	-70.4532	-69.8565	-70.2903	-69.9268	-70.1718
36.05	-69.849	-69.7517	-70.4785	-69.8525	-70.4914	-69.8915	-70.1276
36.1	-69.7979	-69.7063	-70.4667	-69.7935	-70.6793	-69.9204	-69.9653
36.15	-69.7309	-69.694	-70.3902	-69.719	-70.7592	-69.9822	-69.8134
36.2	-69.7399	-69.766	-70.2812	-69.655	-70.7492	-70.0358	-69.7449
36.25	-69.8522	-69.907	-70.237	-69.6353	-70.7155	-70.0744	-69.7316
36.3	-69.9283	-70.0286	-70.2935	-69.7152	-70.6669	-70.1016	-69.7553
36.35	-69.8453	-70.08	-70.4088	-69.9074	-70.5985	-70.1068	-69.8528
36.4	-69.6483	-70.0763	-70.5204	-70.1216	-70.5473	-70.0677	-69.991
36.45	-69.4529	-70.0679	-70.5813	-70.2211	-70.556	-70.0196	-70.0665
36.5	-69.3415	-70.0878	-70.5991	-70.1683	-70.6279	-70.0207	-70.0394
36.55	-69.341	-70.1439	-70.5913	-70.0284	-70.7223	-70.0972	-69.9908
36.6	-69.4458	-70.2065	-70.579	-69.9021	-70.7923	-70.2266	-69.988
36.65	-69.5924	-70.2452	-70.5719	-69.875	-70.7883	-70.3802	-70.0115
36.7	-69.6881	-70.2656	-70.5731	-69.9921	-70.6954	-70.5196	-70.029
36.75	-69.7228	-70.2854	-70.5632	-70.1905	-70.549	-70.5839	-70.03
36.8	-69.718	-70.2876	-70.5345	-70.3458	-70.4373	-70.5432	-69.9694
36.85	-69.6481	-70.2335	-70.4902	-70.4027	-70.4297	-70.4221	-69.774
36.9	-69.5023	-70.1252	-70.4262	-70.3699	-70.4899	-70.2865	-69.4799
36.95	-69.3577	-69.9884	-70.332	-70.2528	-70.5401	-70.184	-69.2249
37	-69.3144	-69.8551	-70.2366	-70.0673	-70.569	-70.1261	-69.1199
37.05	-69.3712	-69.7538	-70.1821	-69.906	-70.618	-70.0998	-69.1538
37.1	-69.4569	-69.7312	-70.1351	-69.8414	-70.6555	-70.118	-69.2659
37.15	-69.5412	-69.7926	-70.02	-69.8425	-70.6167	-70.1952	-69.4067
37.2	-69.6089	-69.8984	-69.8384	-69.8241	-70.5169	-70.3174	-69.5203
37.25	-69.6285	-69.9993	-69.7083	-69.7586	-70.4525	-70.4464	-69.5546
37.3	-69.5806	-70.1063	-69.706	-69.6603	-70.4856	-70.5429	-69.522
37.35	-69.5095	-70.2312	-69.7953	-69.5691	-70.5667	-70.5752	-69.5107
37.4	-69.4952	-70.3247	-69.9071	-69.5331	-70.6226	-70.5226	-69.5573
37.45	-69.5261	-70.3264	-69.9801	-69.5894	-70.623	-70.3984	-69.6215
37.5	-69.5226	-70.2687	-69.9683	-69.7147	-70.5662	-70.2426	-69.6974
37.55	-69.4711	-70.2195	-69.8846	-69.8268	-70.4509	-70.1119	-69.8354
37.6	-69.4363	-70.1805	-69.8289	-69.8631	-70.3112	-70.0414	-70.024
37.65	-69.4565	-70.1088	-69.8687	-69.8614	-70.2344	-70.0615	-70.1574
37.7	-69.5012	-70.0325	-69.9324	-69.9005	-70.257	-70.1775	-70.1632
37.75	-69.5478	-70.0189	-69.931	-69.9744	-70.3246	-70.3453	-70.0613
37.8	-69.5939	-70.0574	-69.8849	-70.0132	-70.3604	-70.476	-69.9359
37.85	-69.5937	-70.0552	-69.8662	-70.0072	-70.3535	-70.5309	-69.848
37.9	-69.5312	-69.9766	-69.8884	-70.031	-70.3482	-70.5475	-69.807
37.95	-69.4641	-69.8778	-69.9104	-70.1147	-70.3699	-70.5839	-69.7722
38	-69.4269	-69.8163	-69.942	-70.211	-70.4243	-70.6406	-69.7176
38.05	-69.4211	-69.7798	-70.0138	-70.2793	-70.4792	-70.6779	-69.6554
38.1	-69.465	-69.7328	-70.1204	-70.3413	-70.4613	-70.6785	-69.6274
38.15	-69.546	-69.6832	-70.2377	-70.3884	-70.3501	-70.6701	-69.6288
38.2	-69.6106	-69.673	-70.34	-70.3685	-70.2487	-70.6573	-69.6217
38.25	-69.6332	-69.7303	-70.4022	-70.2757	-70.2697	-70.6046	-69.5988
38.3	-69.6713	-69.8258	-70.4073	-70.2008	-70.3575	-70.5031	-69.6032
38.35	-69.7694	-69.915	-70.4104	-70.1845	-70.374	-70.4	-69.6404
38.4	-69.8524	-69.9448	-70.4813	-70.1526	-70.3186	-70.3311	-69.6695
38.45	-69.8436	-69.8876	-70.5988	-70.0246	-70.295	-70.2834	-69.6775
38.5	-69.7896	-69.7658	-70.6623	-69.8387	-70.3431	-70.2402	-69.6848
38.55	-69.7519	-69.6515	-70.6155	-69.6849	-70.3695	-70.2118	-69.6854
38.6	-69.7254	-69.5936	-70.4831	-69.6041	-70.3065	-70.1872	-69.6661
38.65	-69.6848	-69.5934	-70.3099	-69.593	-70.228	-70.1363	-69.6782
38.7	-69.6388	-69.6597	-70.1419	-69.6462	-70.2384	-70.0968	-69.789
38.75	-69.6372	-69.7756	-70.02	-69.7401	-70.3367	-70.1629	-69.9847
38.8	-69.6853	-69.8747	-69.9548	-69.8263	-70.4187	-70.3391	-70.1657
38.85	-69.7093	-69.8841	-69.892	-69.9037	-70.4147	-70.497	-70.272
38.9	-69.6977	-69.809	-69.7877	-70.0021	-70.3762	-70.5399	-70.3176
38.95	-69.7181	-69.7106	-69.6796	-70.1163	-70.3902	-70.503	-70.3349
39	-69.7619	-69.6383	-69.6459	-70.1801	-70.4768	-70.4536	-70.3207
39.05	-69.7645	-69.6172	-69.6782	-70.1481	-70.5591	-70.4097	-70.2847
39.1	-69.7326	-69.6436	-69.7137	-70.013	-70.5565	-70.3704	-70.2463
39.15	-69.7432	-69.6951	-69.731	-69.799	-70.4962	-70.3545	-70.1898
39.2	-69.8554	-69.7478	-69.7668	-69.5857	-70.4517	-70.3643	-70.0687
39.25	-70.0091	-69.8035	-69.8064	-69.5067	-70.4518	-70.3804	-69.9002
39.3	-70.0641	-69.877	-69.7844	-69.6433	-70.4961	-70.3945	-69.764
39.35	-69.9975	-69.9665	-69.695	-69.9249	-70.5768	-70.4307	-69.7138
39.4	-69.8976	-70.0701	-69.6343	-70.1945	-70.6433	-70.4891	-69.7394
39.45	-69.7962	-70.1552	-69.6561	-70.3298	-70.6109	-70.5439	-69.8095
39.5	-69.7141	-70.1695	-69.7091	-70.3167	-70.4872	-70.5684	-69.9154
39.55	-69.7027	-70.0986	-69.7306	-70.2034	-70.4133	-70.5576	-70.0313
39.6	-69.7158	-70.011	-69.7471	-70.0463	-70.4726	-70.5083	-70.1137
39.65	-69.6739	-70.0109	-69.7887	-69.8816	-70.582	-70.4434	-70.1265
39.7	-69.6213	-70.1035	-69.8212	-69.7468	-70.615	-70.3912	-70.0761
39.75	-69.6256	-70.1805	-69.819	-69.7027	-70.548	-70.3523	-69.9636
39.8	-69.6742	-70.1377	-69.8387	-69.7867	-70.4663	-70.3013	-69.7838
39.85	-69.7336	-69.9943	-69.8965	-69.9604	-70.4434	-70.2331	-69.5682
39.9	-69.7692	-69.8322	-69.9163	-70.0961	-70.4659	-70.152	-69.4045
39.95	-69.7372	-69.7187	-69.8579	-70.0913	-70.4901	-70.0606	-69.3374
40	-69.6762	-69.7118	-69.7889	-69.9624	-70.4973	-69.9918	-69.3404
40.05	-69.6592	-69.8246	-69.7711	-69.8423	-70.4936	-70.0033	-69.3971
40.1	-69.6496	-69.9893	-69.8006	-69.8522	-70.4776	-70.1233	-69.5037
40.15	-69.5919	-70.0897	-69.8558	-70.0017	-70.4463	-70.3114	-69.6274
40.2	-69.5352	-70.0848	-69.9244	-70.2173	-70.4578	-70.5143	-69.7001
40.25	-69.5248	-70.0718	-69.969	-70.3881	-70.5653	-70.6966	-69.7036
40.3	-69.5423	-70.1388	-69.9515	-70.4307	-70.7054	-70.8249	-69.6715
40.35	-69.5677	-70.234	-69.8921	-70.3324	-70.7849	-70.8354	-69.6412
40.4	-69.575	-70.2336	-69.8488	-70.1914	-70.7906	-70.7013	-69.607
40.45	-69.5341	-70.1219	-69.8682	-70.1464	-70.7412	-70.4778	-69.56
40.5	-69.5009	-70.0058	-69.9502	-70.232	-70.6592	-70.2586	-69.5474
40.55	-69.5552	-69.9433	-70.0745	-70.3662	-70.5792	-70.1213	-69.6252
40.6	-69.6511	-69.8949	-70.2001	-70.4547	-70.5078	-70.0995	-69.7732
40.65	-69.7128	-69.8359	-70.2786	-70.4666	-70.4232	-70.1995	-69.8749
40.7	-69.772	-69.8064	-70.2679	-70.4021	-70.2992	-70.3701	-69.8337
40.75	-69.8451	-69.8227	-70.1908	-70.2823	-70.142	-70.5146	-69.6618
40.8	-69.862	-69.8296	-70.1072	-70.1891	-70.0211	-70.5462	-69.4732
40.85	-69.8433	-69.7993	-70.0776	-70.1853	-69.9881	-70.472	-69.3894
40.9	-69.887	-69.7677	-70.1029	-70.2267	-70.0131	-70.3619	-69.4538
40.95	-69.9394	-69.7761	-70.1404	-70.1974	-70.0767	-70.2612	-69.6457
41	-69.8672	-69.8284	-70.1346	-70.0715	-70.1834	-70.1856	-69.8874
41.05	-69.7291	-69.883	-70.0703	-69.9692	-70.2789	-70.1472	-70.0719
41.1	-69.685	-69.9098	-69.9654	-69.9704	-70.3109	-70.162	-70.124
41.15	-69.7291	-69.9014	-69.8632	-70.0153	-70.31	-70.1898	-70.0725
41.2	-69.7556	-69.854	-69.8116	-70.0173	-70.3163	-70.1851	-70.0275
41.25	-69.7596	-69.7941	-69.8211	-70.0013	-70.3272	-70.1694	-70.0364
41.3	-69.778	-69.7458	-69.8532	-70.0458	-70.2986	-70.2205	-70.0511
41.35	-69.7963	-69.6915	-69.8667	-70.1437	-70.226	-70.3489	-70.0149
41.4	-69.7651	-69.6197	-69.8812	-70.2138	-70.1361	-70.4581	-69.9544
41.45	-69.6924	-69.5619	-69.936	-70.1928	-70.0444	-70.4702	-69.9422
41.5	-69.6663	-69.5474	-70.0552	-70.0779	-69.9484	-70.4297	-69.9973
41.55	-69.7254	-69.5589	-70.2036	-69.9279	-69.8667	-70.4053	-70.0735
41.6	-69.8105	-69.5825	-70.3129	-69.8096	-69.8174	-70.39	-70.102
41.65	-69.8453	-69.639	-70.3271	-69.7607	-69.8181	-70.3488	-70.0392
41.7	-69.8233	-69.7003	-70.2597	-69.7557	-69.8802	-70.289	-69.9032
41.75	-69.751	-69.7258	-70.1573	-69.7572	-70.0041	-70.203	-69.771
41.8	-69.6429	-69.7462	-70.0552	-69.7919	-70.1324	-70.0952	-69.7393
41.85	-69.5656	-69.7772	-69.9922	-69.8794	-70.2045	-70.0402	-69.8266
41.9	-69.6082	-69.7721	-69.9935	-69.9588	-70.2252	-70.1245	-69.9535
41.95	-69.7155	-69.7269	-70.0451	-69.9753	-70.2549	-70.3129	-70.0211
42	-69.7417	-69.7232	-70.0879	-69.9838	-70.3098	-70.4692	-70.012
42.05	-69.6482	-69.8274	-70.0923	-70.0656	-70.3586	-70.5241	-69.992
42.1	-69.5545	-69.9804	-70.0742	-70.1822	-70.396	-70.5065	-69.9651
42.15	-69.5481	-70.0732	-70.0521	-70.2416	-70.4421	-70.4632	-69.8697
42.2	-69.6166	-70.0834	-70.0048	-70.2316	-70.4989	-70.4184	-69.7313
42.25	-69.7111	-70.0489	-69.9239	-70.1646	-70.536	-70.3889	-69.684
42.3	-69.7893	-70.0108	-69.8902	-70.0512	-70.5476	-70.3831	-69.7727
42.35	-69.7921	-69.9873	-69.9927	-69.9466	-70.5432	-70.3706	-69.8539
42.4	-69.6984	-69.9725	-70.1984	-69.924	-70.5392	-70.3233	-69.8133
42.45	-69.5778	-69.97	-70.3555	-69.9857	-70.542	-70.2707	-69.7314
42.5	-69.5258	-69.9815	-70.3749	-70.0528	-70.5865	-70.26	-69.7182
42.55	-69.5524	-69.968	-70.3011	-70.0863	-70.6903	-70.318	-69.7667
42.6	-69.599	-69.9193	-70.2071	-70.1245	-70.8001	-70.4273	-69.8192
42.65	-69.6317	-69.8664	-70.1275	-70.1705	-70.8367	-70.5256	-69.8762
42.7	-69.6697	-69.8066	-70.0813	-70.1895	-70.7687	-70.5643	-69.9659
42.75	-69.7311	-69.7471	-70.0905	-70.1833	-70.6203	-70.5225	-70.0478
42.8	-69.8141	-69.7382	-70.1118	-70.1538	-70.4111	-70.4154	-70.0503
42.85	-69.8877	-69.7985	-70.0753	-70.0823	-70.1784	-70.3195	-69.9642
42.9	-69.9135	-69.8871	-70.0054	-69.9841	-69.9979	-70.2895	-69.8383
42.95	-69.8685	-69.9105	-69.9989	-69.9282	-69.9408	-70.3184	-69.7187
43	-69.7868	-69.8181	-70.0691	-69.9674	-69.9914	-70.3992	-69.6287
43.05	-69.7229	-69.7124	-70.0947	-70.0507	-70.0999	-70.4931	-69.5947
43.1	-69.7068	-69.6931	-69.9964	-70.0949	-70.2251	-70.5294	-69.6283
43.15	-69.719	-69.7003	-69.8496	-70.102	-70.3398	-70.5185	-69.6631
43.2	-69.7252	-69.705	-69.7655	-70.1056	-70.3877	-70.5184	-69.6346
43.25	-69.7292	-69.8004	-69.7793	-70.1138	-70.3315	-70.5274	-69.5844
43.3	-69.7769	-69.9798	-69.849	-70.1214	-70.1902	-70.532	-69.6043
43.35	-69.9085	-70.1106	-69.919	-70.1116	-70.0355	-70.5551	-69.7091
43.4	-70.0805	-70.1284	-69.9372	-70.099	-69.9243	-70.5984	-69.8188
43.45	-70.183	-70.0645	-69.9019	-70.1317	-69.8887	-70.6092	-69.8736
43.5	-70.1261	-69.9664	-69.885	-70.2039	-69.9359	-70.5227	-69.8834
43.55	-69.9367	-69.8635	-69.9303	-70.284	-70.0379	-70.3913	-69.8639
43.6	-69.7524	-69.7555	-69.9959	-70.3479	-70.1116	-70.3506	-69.8511
43.65	-69.6832	-69.6672	-70.0193	-70.3765	-70.0888	-70.4236	-69.8847
43.7	-69.7172	-69.66	-70.0206	-70.3393	-70.018	-70.481	-69.93
43.75	-69.7624	-69.7187	-70.0843	-70.2567	-70.0145	-70.4032	-69.9403
43.8	-69.778	-69.7532	-70.2136	-70.1809	-70.1098	-70.2692	-69.9193
43.85	-69.784	-69.764	-70.3095	-70.1442	-70.2161	-70.2652	-69.864
43.9	-69.7835	-69.8048	-70.295	-70.1275	-70.2791	-70.4389	-69.781
43.95	-69.7674	-69.8482	-70.1861	-70.1197	-70.3193	-70.6581	-69.7145
44	-69.7638	-69.8836	-70.0762	-70.1505	-70.3547	-70.7582	-69.6848
44.05	-69.819	-69.9826	-70.0256	-70.2418	-70.3593	-70.6732	-69.686
44.1	-69.9007	-70.1335	-70.0184	-70.3464	-70.3365	-70.4314	-69.7268
44.15	-69.9098	-70.2116	-70.0146	-70.3769	-70.3029	-70.1571	-69.8088
44.2	-69.8258	-70.1539	-70.0038	-70.2998	-70.2465	-70.0092	-69.9053
44.25	-69.7439	-69.9986	-70.0222	-70.1336	-70.1515	-70.0697	-69.9691
44.3	-69.7398	-69.8252	-70.0968	-69.9346	-70.076	-70.2601	-69.9697
44.35	-69.7474	-69.7244	-70.2038	-69.7573	-70.1	-70.421	-69.9304
44.4	-69.6853	-69.7312	-70.3073	-69.6525	-70.2051	-70.4658	-69.8667
44.45	-69.592	-69.816	-70.3772	-69.6341	-70.3089	-70.4193	-69.775
44.5	-69.5576	-69.896	-70.3969	-69.6787	-70.3699	-70.3267	-69.6888
44.55	-69.6189	-69.9104	-70.3749	-69.7437	-70.4072	-70.1899	-69.6541
44.6	-69.7328	-69.8615	-70.3396	-69.7807	-70.4146	-70.057	-69.6796
44.65	-69.8448	-69.7894	-70.3138	-69.7722	-70.3681	-70.0125	-69.7046
44.7	-69.898	-69.7168	-70.2526	-69.7262	-70.2767	-70.07	-69.6868
44.75	-69.8572	-69.66	-70.12	-69.6828	-70.1827	-70.146	-69.6665
44.8	-69.7803	-69.625	-70.0047	-69.6975	-70.1132	-70.1762	-69.7284
44.85	-69.758	-69.614	-70.0216	-69.8	-70.0869	-70.1889	-69.8635
44.9	-69.7788	-69.6152	-70.1748	-69.9378	-70.1122	-70.2068	-69.9859
44.95	-69.745	-69.634	-70.3285	-69.9933	-70.1529	-70.1821	-70.0394
45	-69.6536	-69.6781	-70.375	-69.8868	-70.1729	-70.0737	-70.0504
45.05	-69.6404	-69.7518	-70.3343	-69.6443	-70.1709	-69.9394	-70.05
45.1	-69.7549	-69.8549	-70.2763	-69.42	-70.1528	-69.8615	-70.0317
45.15	-69.8846	-69.9984	-70.1948	-69.3674	-70.0989	-69.8737	-69.988
45.2	-69.9378	-70.1623	-70.0795	-69.4985	-70.0112	-69.9421	-69.9309
45.25	-69.9516	-70.2846	-70.0027	-69.6903	-69.9367	-70.0263	-69.8659
45.3	-69.9809	-70.3122	-70.051	-69.8483	-69.9203	-70.1122	-69.7857
45.35	-69.9707	-70.2554	-70.1802	-69.9647	-69.9825	-70.1961	-69.7228
45.4	-69.8588	-70.1706	-70.2469	-70.06	-70.1008	-70.2518	-69.7118
45.45	-69.6755	-70.0917	-70.1915	-70.1182	-70.2256	-70.2388	-69.7485
45.5	-69.4901	-70.0117	-70.088	-70.1383	-70.2781	-70.162	-69.8019
45.55	-69.3659	-69.905	-70.0254	-70.1372	-70.219	-70.073	-69.8576
45.6	-69.3434	-69.774	-69.9985	-70.1159	-70.0912	-70.0261	-69.9032
45.65	-69.4271	-69.641	-69.9828	-70.0524	-70.0051	-70.0202	-69.8836
45.7	-69.5867	-69.5614	-70.0025	-69.9636	-70.0612	-70.0451	-69.7624
45.75	-69.7467	-69.5875	-70.056	-69.8996	-70.2452	-70.1122	-69.575
45.8	-69.8313	-69.7212	-70.0851	-69.9015	-70.4325	-70.2369	-69.4196
45.85	-69.8165	-69.8647	-70.058	-69.9759	-70.5075	-70.3827	-69.3614
45.9	-69.7573	-69.9123	-70.036	-70.1112	-70.4731	-70.501	-69.4078
45.95	-69.7391	-69.8601	-70.0648	-70.245	-70.3811	-70.588	-69.5255
46	-69.7595	-69.7951	-70.0804	-70.2981	-70.2581	-70.6599	-69.648
46.05	-69.7419	-69.7536	-70.0243	-70.2477	-70.162	-70.7097	-69.7105
46.1	-69.6742	-69.694	-69.9307	-70.175	-70.1595	-70.701	-69.7058
46.15	-69.6334	-69.5939	-69.8807	-70.1551	-70.2334	-70.6116	-69.6973
46.2	-69.6768	-69.507	-69.9117	-70.185	-70.2937	-70.4435	-69.7286
46.25	-69.7679	-69.4699	-69.9841	-70.2103	-70.2896	-70.254	-69.7827
46.3	-69.864	-69.4629	-70.0442	-70.2195	-70.2439	-70.1341	-69.791
46.35	-69.975	-69.4803	-70.0638	-70.2299	-70.1888	-70.1417	-69.711
46.4	-70.0693	-69.5572	-70.0629	-70.2251	-70.1497	-70.2279	-69.5595
46.45	-70.091	-69.6974	-70.0725	-70.1421	-70.1286	-70.2774	-69.4076
46.5	-70.0573	-69.8256	-70.0692	-69.9825	-70.1094	-70.1932	-69.3094
46.55	-70.0316	-69.8828	-70.0295	-69.8357	-70.0741	-70.0176	-69.2931
46.6	-70.0399	-69.865	-69.9594	-69.7716	-70.0401	-69.899	-69.346
46.65	-70.0497	-69.7669	-69.9051	-69.7918	-70.065	-69.9277	-69.4134
46.7	-70.0229	-69.5846	-69.9161	-69.8846	-70.1394	-70.0355	-69.4447
46.75	-69.9796	-69.4025	-70.0116	-70.0339	-70.1626	-70.1406	-69.4594
46.8	-69.9519	-69.3622	-70.1636	-70.1457	-70.079	-70.2463	-69.5267
46.85	-69.9149	-69.4933	-70.3025	-70.1222	-69.9732	-70.3597	-69.6869
46.9	-69.8199	-69.6948	-70.3659	-69.9757	-69.9742	-70.4089	-69.9175
46.95	-69.6553	-69.8591	-70.3453	-69.83	-70.061	-70.351	-70.1434
47	-69.4975	-69.9597	-70.2755	-69.742	-70.0959	-70.2395	-70.2775
47.05	-69.4584	-69.9838	-70.1642	-69.6662	-70.0262	-70.1502	-70.2818
47.1	-69.5483	-69.9136	-69.9994	-69.5582	-69.9269	-70.0899	-70.223
47.15	-69.6915	-69.7857	-69.7998	-69.4528	-69.874	-70.0565	-70.1821
47.2	-69.815	-69.6994	-69.6491	-69.3821	-69.8441	-70.0624	-70.176
47.25	-69.8505	-69.7468	-69.6176	-69.3505	-69.7942	-70.1063	-70.1769
47.3	-69.7935	-69.9092	-69.6913	-69.3613	-69.7451	-70.1419	-70.2029
47.35	-69.7242	-70.079	-69.777	-69.4184	-69.7465	-70.1426	-70.2704
47.4	-69.6874	-70.1486	-69.8397	-69.5052	-69.8185	-70.11	-70.3476
47.45	-69.6482	-70.0894	-69.9125	-69.591	-69.9269	-70.0585	-70.3676
47.5	-69.5668	-69.9364	-69.9981	-69.678	-70.0177	-69.9887	-70.312
47.55	-69.4481	-69.7644	-70.0228	-69.77	-70.0804	-69.9344	-70.205
47.6	-69.373	-69.6634	-69.9579	-69.8536	-70.1421	-69.9445	-70.0661
47.65	-69.3988	-69.6692	-69.8648	-69.893	-70.238	-70.0295	-69.9042
47.7	-69.4501	-69.7486	-69.8207	-69.876	-70.3559	-70.1342	-69.7719
47.75	-69.4568	-69.8398	-69.8264	-69.8161	-70.4268	-70.2083	-69.744
47.8	-69.4564	-69.9125	-69.8433	-69.7275	-70.4019	-70.2221	-69.8172
47.85	-69.451	-69.9771	-69.8411	-69.6315	-70.29	-70.1734	-69.9324
47.9	-69.4029	-70.0403	-69.8215	-69.5848	-70.1516	-70.1095	-70.0614
47.95	-69.3663	-70.0825	-69.7861	-69.6396	-70.0633	-70.0958	-70.2127
48	-69.4061	-70.0579	-69.7499	-69.7611	-70.0469	-70.1314	-70.3245
48.05	-69.473	-69.9612	-69.7305	-69.8781	-70.0662	-70.1688	-70.3186
48.1	-69.5103	-69.84	-69.7306	-69.9402	-70.0886	-70.1951	-70.2065
48.15	-69.5429	-69.7399	-69.7514	-69.9313	-70.1272	-70.2061	-70.0886
48.2	-69.5992	-69.6785	-69.8223	-69.8498	-70.223	-70.1908	-70.0096
48.25	-69.6761	-69.6627	-69.9577	-69.7293	-70.3602	-70.16	-69.9523
48.3	-69.7531	-69.7224	-70.1048	-69.6452	-70.4467	-70.1593	-69.957
48.35	-69.782	-69.8505	-70.1878	-69.6489	-70.4038	-70.1816	-70.0855
48.4	-69.7637	-69.9809	-70.201	-69.7335	-70.2609	-70.185	-70.269
48.45	-69.7522	-70.049	-70.1904	-69.8418	-70.1655	-70.1636	-70.335
48.5	-69.7399	-70.056	-70.1623	-69.9164	-70.2128	-70.1749	-70.2325
48.55	-69.6885	-70.0556	-70.0963	-69.9017	-70.3119	-70.2369	-70.0644
48.6	-69.6365	-70.0606	-70.0212	-69.7863	-70.3528	-70.28	-69.9243
48.65	-69.6231	-70.0379	-69.9893	-69.6736	-70.3442	-70.2368	-69.8056
48.7	-69.6201	-69.9859	-69.994	-69.7056	-70.2961	-70.1595	-69.6937
48.75	-69.6397	-69.9513	-70.0022	-69.9071	-70.1996	-70.1767	-69.6096
48.8	-69.7095	-69.9756	-70.0047	-70.1262	-70.1	-70.3091	-69.5548
48.85	-69.7547	-70.0178	-70.0137	-70.2052	-70.06	-70.4502	-69.525
48.9	-69.7252	-70.012	-70.0194	-70.1184	-70.0809	-70.5043	-69.5218
48.95	-69.7061	-69.9746	-70.0169	-69.9347	-70.1091	-70.4966	-69.554
49	-69.7258	-69.97	-70.0137	-69.7462	-70.1092	-70.4852	-69.6051
49.05	-69.6834	-70.0086	-70.0168	-69.6298	-70.1315	-70.4844	-69.6272
49.1	-69.5994	-70.003	-69.993	-69.6296	-70.2063	-70.4649	-69.5673
49.15	-69.6068	-69.8865	-69.9256	-69.7008	-70.2639	-70.406	-69.4316
49.2	-69.6612	-69.7111	-69.8579	-69.7455	-70.2595	-70.3319	-69.3287
49.25	-69.6066	-69.5861	-69.8599	-69.7451	-70.2246	-70.2854	-69.3692
49.3	-69.4961	-69.5676	-69.9128	-69.76	-70.174	-70.2989	-69.5499
49.35	-69.5116	-69.6117	-69.9295	-69.8279	-70.1182	-70.3389	-69.7322
49.4	-69.6714	-69.6519	-69.8719	-69.8803	-70.1011	-70.3151	-69.7911
49.45	-69.8672	-69.6915	-69.7951	-69.8464	-70.1145	-70.1721	-69.7316
49.5	-70.0347	-69.768	-69.7697	-69.7696	-70.0766	-70.0024	-69.648
49.55	-70.1381	-69.8782	-69.8112	-69.7345	-69.9379	-69.9805	-69.6094
49.6	-70.1567	-69.9374	-69.8812	-69.7611	-69.7785	-70.1357	-69.6216
49.65	-70.1294	-69.8684	-69.9233	-69.7993	-69.7486	-70.3237	-69.6912
49.7	-70.1106	-69.7178	-69.9443	-69.8171	-69.8668	-70.4188	-69.8068
49.75	-70.1165	-69.5824	-69.9953	-69.8158	-70.0199	-70.4515	-69.9109
49.8	-70.0794	-69.5014	-70.0742	-69.7785	-70.1217	-70.4686	-69.9751
49.85	-69.958	-69.4673	-70.0913	-69.7099	-70.1851	-70.4441	-70.0488
49.9	-69.8284	-69.4791	-70.0165	-69.6353	-70.2196	-70.3571	-70.1753
49.95	-69.7754	-69.5327	-69.9139	-69.5594	-70.2186	-70.2718	-70.2725
50	-69.7532	-69.5745	-69.8446	-69.4944	-70.2097	-70.235	-70.2189
50.05	-69.6757	-69.5569	-69.8027	-69.4791	-70.2497	-70.2137	-70.0355
50.1	-69.5754	-69.5116	-69.7794	-69.5526	-70.3384	-70.1692	-69.8735
50.15	-69.5567	-69.4879	-69.816	-69.6779	-70.4269	-70.1061	-69.857
50.2	-69.6188	-69.507	-69.9445	-69.772	-70.4901	-70.0332	-69.9533
50.25	-69.6458	-69.5783	-70.138	-69.8219	-70.5282	-69.9401	-70.0602
50.3	-69.5862	-69.6821	-70.3348	-69.8563	-70.5388	-69.8623	-70.1364
50.35	-69.5212	-69.7678	-70.4962	-69.8505	-70.5045	-69.8567	-70.1861
50.4	-69.523	-69.7973	-70.5818	-69.7537	-70.4216	-69.8955	-70.2132
50.45	-69.555	-69.7751	-70.55	-69.5905	-70.292	-69.9036	-70.2097
50.5	-69.5703	-69.7364	-70.3955	-69.4572	-70.1595	-69.8723	-70.1773
50.55	-69.6015	-69.6868	-70.1904	-69.4042	-70.1064	-69.8755	-70.1318
50.6	-69.6653	-69.6023	-70.0637	-69.4237	-70.1908	-69.9442	-70.0869
50.65	-69.6999	-69.5095	-70.0851	-69.5148	-70.3615	-70.022	-70.075
50.7	-69.6419	-69.464	-70.2118	-69.6248	-70.5207	-70.0684	-70.1094
50.75	-69.5097	-69.4888	-70.3439	-69.6484	-70.6323	-70.081	-70.1363
50.8	-69.3822	-69.5693	-70.3978	-69.5514	-70.6759	-70.0481	-70.1019
50.85	-69.3474	-69.6594	-70.2946	-69.4202	-70.5978	-69.9702	-70.0101
50.9	-69.4228	-69.7294	-70.0188	-69.3653	-70.3933	-69.9005	-69.9021
50.95	-69.5365	-69.786	-69.7165	-69.4126	-70.1896	-69.903	-69.8043
51	-69.5907	-69.8222	-69.5978	-69.5257	-70.0939	-69.9632	-69.7397
51.05	-69.5505	-69.8466	-69.709	-69.6625	-70.0961	-70.0057	-69.7458
51.1	-69.4621	-69.8758	-69.8841	-69.7764	-70.1308	-70.0183	-69.7901
51.15	-69.4218	-69.8649	-69.9647	-69.8722	-70.1908	-70.0229	-69.7657
51.2	-69.4898	-69.7862	-69.951	-69.9986	-70.2867	-70.0176	-69.6364
51.25	-69.6287	-69.6938	-69.9261	-70.1195	-70.3929	-70.028	-69.5135
51.3	-69.7561	-69.6293	-69.9476	-70.1492	-70.4651	-70.0821	-69.5355
51.35	-69.8128	-69.6059	-69.9985	-70.0897	-70.5075	-70.1499	-69.6604
51.4	-69.8049	-69.6482	-70.0234	-70.0302	-70.542	-70.1978	-69.7278
51.45	-69.7755	-69.7322	-69.9554	-70.0366	-70.5653	-70.2289	-69.6867
51.5	-69.7647	-69.8201	-69.799	-70.0755	-70.5651	-70.2618	-69.6182
51.55	-69.7466	-69.9035	-69.6873	-70.0589	-70.5655	-70.3158	-69.5922
51.6	-69.6829	-69.9376	-69.7277	-69.9774	-70.5905	-70.3663	-69.6096
51.65	-69.5928	-69.867	-69.8578	-69.8986	-70.6349	-70.3695	-69.6436
51.7	-69.5388	-69.7386	-69.93	-69.8587	-70.6789	-70.3352	-69.678
51.75	-69.5523	-69.6134	-69.9054	-69.8565	-70.7294	-70.2968	-69.685
51.8	-69.609	-69.4833	-69.8527	-69.8519	-70.7872	-70.2911	-69.6524
51.85	-69.6976	-69.3765	-69.8065	-69.8091	-70.8169	-70.3561	-69.6303
51.9	-69.8017	-69.3643	-69.7553	-69.7406	-70.7645	-70.4731	-69.6546
51.95	-69.8777	-69.4283	-69.6984	-69.6847	-70.633	-70.5574	-69.6998
52	-69.8732	-69.5064	-69.6607	-69.6731	-70.4708	-70.5196	-69.7153
52.05	-69.7977	-69.5864	-69.6733	-69.7279	-70.3277	-70.3853	-69.6553
52.1	-69.7388	-69.6622	-69.7214	-69.8456	-70.2264	-70.2681	-69.5445
52.15	-69.764	-69.7254	-69.7597	-69.9813	-70.1773	-70.2264	-69.4603
52.2	-69.8622	-69.7688	-69.7522	-70.0772	-70.1549	-70.2387	-69.4202
52.25	-69.9451	-69.7497	-69.713	-70.1055	-70.0977	-70.25	-69.4169
52.3	-69.9443	-69.6646	-69.7216	-70.0367	-69.9816	-70.2274	-69.4579
52.35	-69.8834	-69.5909	-69.8227	-69.855	-69.8697	-70.1709	-69.5225
52.4	-69.8428	-69.5685	-69.9538	-69.6156	-69.8517	-70.1148	-69.5899
52.45	-69.8836	-69.563	-70.0333	-69.4522	-69.9376	-70.0965	-69.6587
52.5	-69.9725	-69.569	-70.0685	-69.4473	-70.0724	-70.1264	-69.6954
52.55	-70.0001	-69.5841	-70.119	-69.5692	-70.1983	-70.1636	-69.703
52.6	-69.8755	-69.5459	-70.1776	-69.7406	-70.2918	-70.1286	-69.7414
52.65	-69.6552	-69.4374	-70.1986	-69.9118	-70.3114	-70.0056	-69.8115
52.7	-69.5076	-69.3095	-70.1956	-70.031	-70.2271	-69.8698	-69.867
52.75	-69.5035	-69.2208	-70.2101	-70.0155	-70.0642	-69.7982	-69.9108
52.8	-69.5522	-69.2129	-70.2579	-69.8392	-69.9059	-69.7955	-69.9797
52.85	-69.5334	-69.311	-70.3152	-69.5947	-69.8033	-69.8489	-70.0668
52.9	-69.4461	-69.4985	-70.347	-69.4381	-69.7445	-69.9473	-70.1056
52.95	-69.3668	-69.71	-70.3439	-69.4368	-69.719	-70.057	-70.094
53	-69.348	-69.8815	-70.2981	-69.5345	-69.7569	-70.1263	-70.094
53.05	-69.417	-69.9893	-70.2056	-69.6479	-69.8993	-70.1273	-70.132
53.1	-69.5333	-70.0221	-70.1134	-69.7041	-70.1145	-70.0807	-70.1555
53.15	-69.5781	-69.9749	-70.0748	-69.6631	-70.3249	-70.0045	-70.138
53.2	-69.493	-69.8881	-70.0969	-69.5374	-70.438	-69.9068	-70.1121
53.25	-69.3822	-69.8251	-70.1157	-69.4091	-70.4026	-69.8173	-70.1072
53.3	-69.3866	-69.7806	-70.1101	-69.3456	-70.2326	-69.788	-70.0969
53.35	-69.4703	-69.6997	-70.1249	-69.3495	-70.0176	-69.8041	-70.0634
53.4	-69.4865	-69.5798	-70.1802	-69.4014	-69.8733	-69.8076	-70.0427
53.45	-69.403	-69.4849	-70.2185	-69.5226	-69.8764	-69.797	-70.0665
53.5	-69.3204	-69.4528	-70.2187	-69.7193	-70.0286	-69.8386	-70.1125
53.55	-69.3258	-69.4839	-70.2386	-69.904	-70.2324	-69.9563	-70.115
53.6	-69.394	-69.5586	-70.3178	-69.9712	-70.3657	-70.088	-70.0606
53.65	-69.4753	-69.6609	-70.4026	-69.8957	-70.3632	-70.1569	-69.9938
53.7	-69.5634	-69.77	-70.4337	-69.7259	-70.2664	-70.1244	-69.9522
53.75	-69.6572	-69.8713	-70.4143	-69.5112	-70.1612	-70.0096	-69.9165
53.8	-69.7386	-69.9638	-70.3423	-69.3079	-70.1071	-69.8612	-69.8842
53.85	-69.7644	-70.0585	-70.2183	-69.1691	-70.129	-69.7661	-69.8971
53.9	-69.7121	-70.1282	-70.1046	-69.1312	-70.2335	-69.7721	-69.9635
53.95	-69.6249	-70.1199	-70.0827	-69.1884	-70.4056	-69.8623	-70.021
54	-69.567	-70.0417	-70.1255	-69.3113	-70.5674	-69.9802	-70.015
54.05	-69.5809	-69.9884	-70.1211	-69.4357	-70.6303	-70.0939	-69.9662
54.1	-69.6652	-70.0279	-70.0058	-69.4928	-70.5716	-70.1927	-69.8959
54.15	-69.7973	-70.1266	-69.8277	-69.4508	-70.45	-70.277	-69.8224
54.2	-69.9624	-70.2062	-69.716	-69.3661	-70.3357	-70.341	-69.7807
54.25	-70.1046	-70.2292	-69.7442	-69.3288	-70.2566	-70.3634	-69.812
54.3	-70.1387	-70.1969	-69.8611	-69.3867	-70.2406	-70.3337	-69.8949
54.35	-70.0483	-70.1219	-69.9686	-69.5205	-70.2955	-70.259	-69.9675
54.4	-69.9254	-70.0333	-70.0011	-69.6876	-70.3512	-70.1632	-70.0038
54.45	-69.8716	-69.9865	-69.9665	-69.8391	-70.3067	-70.0419	-70.0354
54.5	-69.8729	-69.9969	-69.9289	-69.9265	-70.1664	-69.8858	-70.0748
54.55	-69.8659	-70.0367	-69.9352	-69.9624	-70.0568	-69.7186	-70.0482
54.6	-69.8514	-70.077	-69.9577	-70.0029	-70.0479	-69.6416	-69.8773
54.65	-69.8326	-70.1136	-69.9469	-70.0642	-70.085	-69.7239	-69.5939
54.7	-69.7842	-70.096	-69.9462	-70.1096	-70.0856	-69.9025	-69.3316
54.75	-69.7095	-69.9668	-70.0291	-70.1424	-70.0552	-70.0307	-69.1942
54.8	-69.6609	-69.7451	-70.1634	-70.1824	-70.0589	-70.0601	-69.1948
54.85	-69.6894	-69.5336	-70.2549	-70.2234	-70.1241	-70.0533	-69.2763
54.9	-69.7806	-69.4011	-70.2549	-70.2287	-70.2409	-70.0924	-69.3556
54.95	-69.8793	-69.3249	-70.185	-70.1903	-70.3628	-70.1945	-69.3974
55	-69.9527	-69.2849	-70.0817	-70.1126	-70.4128	-70.323	-69.4592
55.05	-69.9995	-69.3304	-70.0061	-70.0003	-70.359	-70.4066	-69.5974
55.1	-70.0471	-69.4976	-70.0221	-69.8666	-70.2634	-70.4108	-69.7675
55.15	-70.1059	-69.6787	-70.1395	-69.7599	-70.2119	-70.362	-69.9051
55.2	-70.1332	-69.7208	-70.3093	-69.7091	-70.176	-70.3302	-70.0109
55.25	-70.1148	-69.5786	-70.4931	-69.6796	-70.0767	-70.364	-70.1043
55.3	-70.0762	-69.3437	-70.6591	-69.6181	-69.9357	-70.4474	-70.1497
55.35	-70.0062	-69.1632	-70.7437	-69.5303	-69.8301	-70.4992	-70.1193
55.4	-69.9047	-69.148	-70.71	-69.4681	-69.7641	-70.478	-70.0446
55.45	-69.8182	-69.3035	-70.6005	-69.4671	-69.6847	-70.4362	-69.9881
55.5	-69.7708	-69.5025	-70.4664	-69.5399	-69.6068	-70.4362	-69.976
55.55	-69.771	-69.607	-70.286	-69.6656	-69.6155	-70.4603	-70.0054
55.6	-69.8318	-69.587	-70.0347	-69.7935	-69.7231	-70.4697	-70.0512
55.65	-69.9342	-69.5206	-69.7859	-69.8512	-69.8406	-70.4488	-70.0745
55.7	-70.0145	-69.493	-69.6714	-69.8193	-69.8915	-70.404	-70.0422
55.75	-69.9992	-69.524	-69.7297	-69.7421	-69.9014	-70.351	-69.9599
55.8	-69.8827	-69.5863	-69.8787	-69.6878	-69.9433	-70.3257	-69.8599
55.85	-69.7583	-69.6161	-70.0241	-69.6615	-69.9988	-70.3328	-69.7655
55.9	-69.6848	-69.5779	-70.131	-69.6258	-69.9959	-70.3225	-69.7105
55.95	-69.6148	-69.5059	-70.1861	-69.5974	-69.9204	-70.2411	-69.7586
56	-69.5298	-69.4822	-70.188	-69.63	-69.8249	-70.1181	-69.9392
56.05	-69.4664	-69.5453	-70.1594	-69.7163	-69.7846	-70.0222	-70.1586
56.1	-69.429	-69.6575	-70.1339	-69.7726	-69.8453	-69.9668	-70.2981
56.15	-69.411	-69.7743	-70.1116	-69.7609	-69.9838	-69.9113	-70.3194
56.2	-69.4374	-69.8592	-70.0675	-69.7017	-70.1293	-69.8546	-70.2509
56.25	-69.5128	-69.8756	-70.0061	-69.6056	-70.2164	-69.8457	-70.1071
56.3	-69.6011	-69.808	-69.9808	-69.4547	-70.2516	-69.9115	-69.9209
56.35	-69.6516	-69.7041	-70.0324	-69.2874	-70.2848	-70.0361	-69.7789
56.4	-69.6438	-69.6559	-70.1241	-69.1847	-70.3332	-70.17	-69.7443
56.45	-69.618	-69.7006	-70.1924	-69.1809	-70.3766	-70.253	-69.786
56.5	-69.6182	-69.8048	-70.2261	-69.2626	-70.3813	-70.2348	-69.8387
56.55	-69.6159	-69.9124	-70.2533	-69.4044	-70.3513	-70.1584	-69.9142
56.6	-69.6089	-69.9826	-70.2832	-69.5586	-70.3377	-70.1291	-70.0361
56.65	-69.6469	-70.0007	-70.3177	-69.6445	-70.3468	-70.1928	-70.156
56.7	-69.7109	-69.9866	-70.3631	-69.6316	-70.3366	-70.2632	-70.1886
56.75	-69.7564	-69.9917	-70.4086	-69.5794	-70.2866	-70.247	-70.13
56.8	-69.808	-69.9964	-70.4121	-69.5649	-70.2207	-70.1392	-70.0471
56.85	-69.8528	-69.9167	-70.3853	-69.6146	-70.217	-69.9883	-69.9921
56.9	-69.8283	-69.7316	-70.4058	-69.6974	-70.3158	-69.8441	-69.9732
56.95	-69.7705	-69.5645	-70.4982	-69.7879	-70.4286	-69.7662	-70.0005
57	-69.7572	-69.566	-70.5665	-69.8668	-70.4521	-69.7986	-70.1038
57.05	-69.7351	-69.7213	-70.5392	-69.9091	-70.4069	-69.9142	-70.2286
57.1	-69.6555	-69.8749	-70.4474	-69.8841	-70.3574	-70.0637	-70.2527
57.15	-69.5904	-69.9127	-70.3531	-69.793	-70.316	-70.21	-70.1217
57.2	-69.5608	-69.857	-70.2681	-69.6932	-70.2639	-70.3312	-69.9245
57.25	-69.5055	-69.7882	-70.2094	-69.6468	-70.2157	-70.3833	-69.757
57.3	-69.4569	-69.73	-70.2039	-69.6758	-70.2203	-70.3426	-69.6236
57.35	-69.5003	-69.6687	-70.2345	-69.7129	-70.2781	-70.2406	-69.5216
57.4	-69.5972	-69.6103	-70.2228	-69.6634	-70.3298	-70.1462	-69.4942
57.45	-69.6641	-69.5708	-70.1317	-69.5414	-70.359	-70.1265	-69.5593
57.5	-69.6923	-69.5574	-70.0065	-69.4711	-70.3912	-70.2119	-69.627
57.55	-69.6877	-69.5609	-69.9073	-69.5535	-70.4015	-70.384	-69.6086
57.6	-69.6554	-69.5939	-69.8475	-69.736	-70.3356	-70.5394	-69.5226
57.65	-69.6386	-69.6583	-69.8282	-69.8855	-70.2096	-70.5486	-69.4398
57.7	-69.6303	-69.7223	-69.8636	-69.9375	-70.1199	-70.3853	-69.414
57.75	-69.5633	-69.7787	-69.9589	-69.9145	-70.138	-70.188	-69.4576
57.8	-69.4755	-69.8193	-70.0862	-69.8702	-70.2186	-70.1097	-69.5467
57.85	-69.4931	-69.7953	-70.1903	-69.8127	-70.2849	-70.1457	-69.6049
57.9	-69.6167	-69.6872	-70.2709	-69.7419	-70.3375	-70.208	-69.5773
57.95	-69.7484	-69.5563	-70.3738	-69.6982	-70.3609	-70.2531	-69.5256
58	-69.8587	-69.4854	-70.5221	-69.7309	-70.3146	-70.2812	-69.5617
58.05	-69.9346	-69.4766	-70.6563	-69.8501	-70.2074	-70.2609	-69.7129
58.1	-69.9387	-69.4856	-70.6843	-69.989	-70.0947	-70.1735	-69.8704
58.15	-69.8627	-69.5064	-70.5498	-70.0604	-69.9707	-70.0545	-69.9379
58.2	-69.7669	-69.5278	-70.2817	-70.0458	-69.7937	-69.974	-69.9351
58.25	-69.6989	-69.5205	-69.9708	-69.9996	-69.5884	-69.9366	-69.9241
58.3	-69.6606	-69.4989	-69.716	-69.9874	-69.4569	-69.9019	-69.9329
58.35	-69.6347	-69.5116	-69.5924	-70.0087	-69.4406	-69.8696	-69.936
58.4	-69.6052	-69.5792	-69.628	-70.0163	-69.4834	-69.9108	-69.8925
58.45	-69.5394	-69.6844	-69.7865	-69.9899	-69.513	-70.0437	-69.7991
58.5	-69.4376	-69.8207	-69.9542	-69.9363	-69.5467	-70.172	-69.7168
58.55	-69.3513	-69.9875	-70.0496	-69.8757	-69.6364	-70.2109	-69.7194
58.6	-69.351	-70.1164	-70.0918	-69.8115	-69.7865	-70.1878	-69.7745
58.65	-69.4356	-70.1319	-70.1508	-69.7331	-69.9482	-70.1784	-69.7988
58.7	-69.5334	-70.0475	-70.2384	-69.6597	-70.0674	-70.1848	-69.792
58.75	-69.576	-69.9303	-70.3142	-69.6183	-70.1191	-70.143	-69.8162
58.8	-69.5582	-69.8542	-70.3575	-69.6043	-70.1057	-70.0282	-69.897
58.85	-69.4926	-69.854	-70.3654	-69.6072	-70.0548	-69.8816	-69.9801
58.9	-69.3848	-69.8778	-70.3426	-69.6303	-69.9826	-69.7763	-70.0109
58.95	-69.2496	-69.8606	-70.292	-69.6718	-69.9162	-69.7512	-69.9997
59	-69.1473	-69.8092	-70.2269	-69.6841	-69.8868	-69.7848	-69.9858
59.05	-69.131	-69.7745	-70.1603	-69.626	-69.9209	-69.8335	-70.0083
59.1	-69.2013	-69.7895	-70.1045	-69.5224	-70.0046	-69.8619	-70.0707
59.15	-69.3036	-69.8279	-70.0876	-69.4208	-70.1066	-69.8746	-70.1323
59.2	-69.3955	-69.8456	-70.1226	-69.3638	-70.212	-69.8963	-70.1525
59.25	-69.4532	-69.84	-70.1901	-69.3659	-70.2963	-69.9193	-70.1144
59.3	-69.474	-69.8288	-70.2397	-69.3814	-70.2986	-69.9203	-70.0542
59.35	-69.4627	-69.8422	-70.252	-69.3677	-70.1641	-69.8863	-70.0214
59.4	-69.4372	-69.9134	-70.2702	-69.3388	-69.939	-69.8237	-70.0292
59.45	-69.4196	-70.0101	-70.3366	-69.349	-69.7373	-69.7611	-70.0657
59.5	-69.4335	-70.0785	-70.4193	-69.454	-69.6538	-69.6904	-70.1195
59.55	-69.4583	-70.1135	-70.4272	-69.6292	-69.7065	-69.5998	-70.1955
59.6	-69.4378	-70.1068	-70.3379	-69.7755	-69.8676	-69.5376	-70.2868
59.65	-69.3443	-70.0466	-70.2215	-69.8174	-70.064	-69.5399	-70.3299
59.7	-69.2199	-69.9849	-70.1433	-69.7538	-70.2285	-69.5915	-70.2952
59.75	-69.1386	-69.9793	-70.1238	-69.6542	-70.3362	-69.6844	-70.2301
59.8	-69.1411	-70.0288	-70.1553	-69.6037	-70.4116	-69.7831	-70.1667
59.85	-69.2307	-70.0908	-70.2187	-69.6127	-70.4494	-69.8323	-70.0951
59.9	-69.3811	-70.1095	-70.259	-69.6407	-70.4112	-69.8597	-70.008
59.95	-69.5575	-70.0484	-70.2263	-69.6558	-70.2951	-69.9298	-69.9327
60	-69.7009	-69.9248	-70.1588	-69.6223	-70.1973	-70.0089	-69.8928
60.05	-69.759	-69.7706	-70.1257	-69.5418	-70.2157	-70.0174	-69.8781
60.1	-69.7229	-69.6181	-70.1159	-69.4701	-70.3417	-69.958	-69.9
60.15	-69.6378	-69.5362	-70.0597	-69.4578	-70.4558	-69.9411	-69.9808
60.2	-69.5746	-69.5471	-69.9556	-69.5315	-70.4822	-70.0265	-70.0519
60.25	-69.5839	-69.5767	-69.875	-69.6781	-70.4436	-70.124	-70.031
60.3	-69.6786	-69.5896	-69.8352	-69.8659	-70.387	-70.1512	-69.9398
60.35	-69.7965	-69.6182	-69.8047	-70.0323	-70.3069	-70.1422	-69.8588
60.4	-69.8402	-69.6253	-69.7937	-70.1204	-70.1846	-70.1791	-69.8203
60.45	-69.7532	-69.5837	-69.8589	-70.132	-70.046	-70.2769	-69.7827
60.5	-69.5878	-69.5764	-70.0206	-70.1334	-69.9627	-70.3745	-69.6996
60.55	-69.4932	-69.6551	-70.185	-70.155	-69.987	-70.3929	-69.5876
60.6	-69.5589	-69.769	-70.2423	-70.168	-70.1058	-70.2743	-69.4944
60.65	-69.7265	-69.8828	-70.1892	-70.1561	-70.2727	-70.0577	-69.4581
60.7	-69.8507	-69.99	-70.1067	-70.1445	-70.4072	-69.8643	-69.5018
60.75	-69.8433	-70.0551	-70.068	-70.1417	-70.446	-69.806	-69.6084
60.8	-69.7142	-70.0568	-70.0735	-70.1019	-70.3967	-69.9049	-69.716
60.85	-69.5485	-70.0114	-70.0956	-69.9976	-70.3374	-70.1012	-69.7738
60.9	-69.4694	-69.9252	-70.1394	-69.8581	-70.2824	-70.3097	-69.7664
60.95	-69.5325	-69.8097	-70.208	-69.7556	-70.1689	-70.4493	-69.7128
61	-69.6581	-69.6951	-70.2749	-69.7311	-69.9731	-70.4619	-69.64
61.05	-69.7118	-69.6181	-70.297	-69.7831	-69.778	-70.3147	-69.5182
61.1	-69.6652	-69.6168	-70.2705	-69.8866	-69.6657	-70.0827	-69.3562
61.15	-69.6296	-69.6648	-70.2353	-69.9731	-69.6516	-69.9199	-69.2624
61.2	-69.6718	-69.7157	-70.1954	-69.9431	-69.7359	-69.929	-69.3186
61.25	-69.7306	-69.7585	-70.1519	-69.7731	-69.9045	-70.0794	-69.5246
61.3	-69.72	-69.8004	-70.1624	-69.5974	-70.0852	-70.2771	-69.8231
61.35	-69.6432	-69.8105	-70.2622	-69.5526	-70.1782	-70.4405	-70.1104
61.4	-69.571	-69.7816	-70.4129	-69.637	-70.1832	-70.4954	-70.2579
61.45	-69.559	-69.7446	-70.5153	-69.7617	-70.1674	-70.4028	-70.2241
61.5	-69.6242	-69.7268	-70.5175	-69.8523	-70.1497	-70.1965	-70.0968
61.55	-69.701	-69.7231	-70.4692	-69.8593	-70.0686	-69.9883	-69.9889
61.6	-69.6693	-69.7638	-70.4453	-69.7572	-69.9206	-69.8661	-69.94
61.65	-69.5041	-69.9016	-70.4788	-69.6058	-69.812	-69.8604	-69.9284
61.7	-69.3375	-70.1288	-70.5436	-69.505	-69.8298	-69.9464	-69.9189
61.75	-69.3182	-70.3425	-70.6015	-69.5038	-69.9595	-70.0802	-69.8858
61.8	-69.4117	-70.443	-70.6294	-69.5601	-70.1427	-70.1884	-69.8316
61.85	-69.4782	-70.4174	-70.6221	-69.6379	-70.3235	-70.2013	-69.7516
61.9	-69.4951	-70.3158	-70.6012	-69.7421	-70.4086	-70.1031	-69.6425
61.95	-69.5448	-70.1979	-70.588	-69.847	-70.3393	-69.9147	-69.5171
62	-69.6541	-70.0856	-70.5813	-69.8761	-70.1539	-69.6753	-69.4378
62.05	-69.7335	-69.9661	-70.5445	-69.8217	-69.959	-69.4321	-69.4764
62.1	-69.7066	-69.8015	-70.4563	-69.7624	-69.8621	-69.2544	-69.6356
62.15	-69.6167	-69.6074	-70.3573	-69.7489	-69.9221	-69.186	-69.8293
62.2	-69.5568	-69.4623	-70.3417	-69.7564	-70.1123	-69.238	-69.9422
62.25	-69.5639	-69.4635	-70.4356	-69.7507	-70.3023	-69.3776	-69.9267
62.3	-69.6016	-69.6202	-70.5455	-69.7314	-70.3826	-69.5594	-69.8199
62.35	-69.6288	-69.8462	-70.6072	-69.6924	-70.3621	-69.7299	-69.7198
62.4	-69.6627	-70.0321	-70.6458	-69.6201	-70.3205	-69.8478	-69.7071
62.45	-69.709	-70.1399	-70.66	-69.535	-70.2896	-69.916	-69.8149
62.5	-69.735	-70.1788	-70.5873	-69.4999	-70.2509	-69.9893	-70.0112
62.55	-69.6936	-70.1741	-70.4283	-69.5589	-70.206	-70.1101	-70.2118
62.6	-69.5763	-70.1577	-70.2724	-69.6911	-70.1787	-70.2354	-70.3238
62.65	-69.4685	-70.1737	-70.1436	-69.839	-70.1928	-70.2592	-70.3044
62.7	-69.4678	-70.2236	-70.0065	-69.9496	-70.2282	-70.1132	-70.1851
62.75	-69.5725	-70.2553	-69.89	-70.0115	-70.2569	-69.8595	-70.0211
62.8	-69.6994	-70.2211	-69.8663	-70.058	-70.2883	-69.6089	-69.8691
62.85	-69.7921	-70.157	-69.915	-70.1194	-70.3554	-69.4311	-69.788
62.9	-69.8678	-70.1286	-69.9188	-70.1579	-70.471	-69.3502	-69.8089
62.95	-69.9387	-70.1468	-69.8646	-70.1496	-70.5867	-69.3813	-69.8671
63	-69.9662	-70.1505	-69.8756	-70.1524	-70.6422	-69.4891	-69.8672
63.05	-69.9119	-70.0995	-69.9898	-70.2287	-70.6164	-69.6141	-69.7972
63.1	-69.759	-69.9999	-70.0909	-70.3219	-70.5461	-69.7045	-69.7418
63.15	-69.5476	-69.865	-70.0834	-70.3408	-70.5223	-69.7484	-69.7267
63.2	-69.3839	-69.7139	-70.0361	-70.2634	-70.5916	-69.7793	-69.6936
63.25	-69.3408	-69.6053	-70.0599	-70.1333	-70.6844	-69.8828	-69.6144
63.3	-69.3959	-69.6201	-70.1732	-69.9785	-70.6725	-70.1021	-69.5553
63.35	-69.4706	-69.7558	-70.3221	-69.8198	-70.5292	-70.3693	-69.5526
63.4	-69.5133	-69.9324	-70.4367	-69.6807	-70.3741	-70.5554	-69.5446
63.45	-69.5571	-70.0692	-70.4751	-69.594	-70.2967	-70.6152	-69.4646
63.5	-69.6516	-70.139	-70.4323	-69.5826	-70.2535	-70.5929	-69.3565
63.55	-69.7843	-70.1173	-70.3472	-69.6477	-70.1687	-70.5453	-69.3045
63.6	-69.8872	-69.9965	-70.2625	-69.7623	-70.0607	-70.498	-69.3293
63.65	-69.898	-69.8453	-70.2201	-69.8831	-70.0014	-70.4853	-69.4144
63.7	-69.8535	-69.7758	-70.2303	-69.9816	-69.9935	-70.5212	-69.5605
63.75	-69.8434	-69.8461	-70.2753	-70.0487	-69.9998	-70.576	-69.7478
63.8	-69.8749	-70.0001	-70.3106	-70.0984	-70.0128	-70.5927	-69.9072
63.85	-69.8987	-70.1538	-70.3175	-70.1415	-70.0377	-70.5576	-70.0094
63.9	-69.8829	-70.2325	-70.3025	-70.1729	-70.0672	-70.4772	-70.0846
63.95	-69.8046	-70.184	-70.2947	-70.1589	-70.0797	-70.3479	-70.14
64	-69.7108	-70.0147	-70.3197	-70.0892	-70.0743	-70.1786	-70.1141
64.05	-69.6865	-69.8339	-70.3977	-69.981	-70.0434	-70.0509	-69.9909
64.1	-69.7056	-69.7737	-70.5122	-69.8518	-69.9811	-70.0423	-69.8349
64.15	-69.6683	-69.8521	-70.6109	-69.7098	-69.9391	-70.1317	-69.7197
64.2	-69.5466	-70.0001	-70.6299	-69.5976	-69.9547	-70.2276	-69.6367
64.25	-69.4008	-70.1386	-70.5717	-69.559	-69.9736	-70.2908	-69.5473
64.3	-69.3397	-70.2047	-70.5059	-69.56	-69.9416	-70.3162	-69.4571
64.35	-69.3974	-70.1628	-70.4965	-69.5442	-69.8888	-70.288	-69.4149
64.4	-69.4678	-70.0585	-70.5213	-69.5453	-69.8701	-70.1709	-69.46
64.45	-69.4685	-69.9958	-70.5247	-69.6548	-69.8653	-69.9856	-69.5728
64.5	-69.4256	-70.0121	-70.4939	-69.8336	-69.8395	-69.809	-69.6914
64.55	-69.3488	-70.0763	-70.4789	-69.9309	-69.8218	-69.6819	-69.7684
64.6	-69.249	-70.1568	-70.4977	-69.8613	-69.8245	-69.5782	-69.8329
64.65	-69.2127	-70.2175	-70.518	-69.7008	-69.8168	-69.5081	-69.9299
64.7	-69.2732	-70.1878	-70.5039	-69.559	-69.7959	-69.5264	-70.0617
64.75	-69.3829	-70.0409	-70.4725	-69.4761	-69.8069	-69.6196	-70.1848
64.8	-69.5057	-69.8721	-70.4445	-69.4587	-69.8835	-69.7144	-70.2523
64.85	-69.5896	-69.7904	-70.4158	-69.5082	-69.9971	-69.7937	-70.2072
64.9	-69.5759	-69.8069	-70.3642	-69.6037	-70.0884	-69.9168	-70.0498
64.95	-69.5135	-69.8577	-70.3019	-69.6716	-70.1206	-70.0714	-69.9051
65	-69.4941	-69.9076	-70.231	-69.6594	-70.0755	-70.1664	-69.9147
65.05	-69.5371	-69.9686	-70.1376	-69.5783	-70.0034	-70.1445	-70.0847
65.1	-69.6296	-70.0325	-70.0362	-69.4738	-70.003	-70.0654	-70.2862
65.15	-69.7455	-70.0875	-69.985	-69.3912	-70.079	-70.0026	-70.4056
65.2	-69.8088	-70.1362	-69.9704	-69.3809	-70.1579	-69.9556	-70.4054
65.25	-69.8048	-70.1793	-69.8992	-69.4525	-70.2147	-69.8782	-70.307
65.3	-69.7954	-70.1907	-69.7355	-69.5115	-70.2835	-69.7716	-70.1458
65.35	-69.7693	-70.1386	-69.5675	-69.4673	-70.3718	-69.6799	-69.9659
65.4	-69.6863	-70.0471	-69.4894	-69.3606	-70.4057	-69.6331	-69.8472
65.45	-69.6018	-69.9709	-69.5141	-69.3085	-70.338	-69.6515	-69.8602
65.5	-69.5636	-69.9209	-69.6332	-69.3667	-70.2691	-69.7351	-69.9874
65.55	-69.5454	-69.8351	-69.8471	-69.5146	-70.3101	-69.8587	-70.1087
65.6	-69.5815	-69.6901	-70.099	-69.7124	-70.4145	-69.9783	-70.1551
65.65	-69.7098	-69.5866	-70.2736	-69.876	-70.4775	-70.0676	-70.1607
65.7	-69.803	-69.6049	-70.3307	-69.9105	-70.4867	-70.0794	-70.1587
65.75	-69.7456	-69.7009	-70.3316	-69.7949	-70.4973	-69.9808	-70.1288
65.8	-69.6502	-69.7978	-70.3499	-69.6249	-70.5343	-69.8358	-70.0834
65.85	-69.6488	-69.8796	-70.3979	-69.5388	-70.5742	-69.7575	-70.1072
65.9	-69.6902	-69.9514	-70.4805	-69.6066	-70.6199	-69.7916	-70.2123
65.95	-69.705	-69.9673	-70.572	-69.805	-70.714	-69.882	-70.2906
66	-69.7202	-69.9085	-70.6135	-70.0225	-70.8249	-69.9493	-70.2436
66.05	-69.7432	-69.8396	-70.5596	-70.1405	-70.8338	-69.9373	-70.1199
66.1	-69.7369	-69.809	-70.4465	-70.1531	-70.6965	-69.8435	-70.0421
66.15	-69.6971	-69.7986	-70.304	-70.1458	-70.4912	-69.7255	-70.0468
66.2	-69.6628	-69.7627	-70.1157	-70.1643	-70.3438	-69.6661	-70.0952
66.25	-69.6942	-69.7053	-69.899	-70.1435	-70.3457	-69.7211	-70.1347
66.3	-69.8001	-69.6722	-69.7579	-70.0362	-70.4711	-69.8746	-70.1096
66.35	-69.8721	-69.6887	-69.7946	-69.9177	-70.6208	-70.0576	-69.9633
66.4	-69.8393	-69.7446	-70.018	-69.892	-70.667	-70.1879	-69.7256
66.45	-69.7861	-69.7927	-70.3523	-69.9688	-70.5312	-70.2472	-69.5495
66.5	-69.7918	-69.7868	-70.6607	-70.0393	-70.2557	-70.2633	-69.5319
66.55	-69.8457	-69.7418	-70.824	-69.994	-69.9995	-70.2877	-69.6097
66.6	-69.9076	-69.7017	-70.8238	-69.8358	-69.872	-70.3565	-69.6509
66.65	-69.9722	-69.6835	-70.761	-69.6685	-69.8679	-70.4584	-69.5918
66.7	-70.0061	-69.6786	-70.6994	-69.621	-69.9187	-70.5263	-69.4754
66.75	-69.9696	-69.6826	-70.5883	-69.726	-69.9812	-70.4941	-69.3872
66.8	-69.8741	-69.7223	-70.3734	-69.903	-70.0181	-70.3666	-69.3828
66.85	-69.7844	-69.8037	-70.1363	-70.0547	-70.0217	-70.1914	-69.4262
66.9	-69.697	-69.8868	-70.0344	-70.126	-70.0321	-70.0358	-69.4494
66.95	-69.5781	-69.9186	-70.1227	-70.1288	-70.0781	-69.9805	-69.4509
67	-69.4555	-69.863	-70.3251	-70.1051	-70.1149	-70.0891	-69.4729
67.05	-69.4034	-69.7534	-70.5341	-70.0786	-70.0998	-70.3185	-69.5297
67.1	-69.4073	-69.6846	-70.7017	-70.0698	-70.065	-70.5085	-69.5693
67.15	-69.3935	-69.7059	-70.7874	-70.0752	-70.0259	-70.5538	-69.5486
67.2	-69.3508	-69.7893	-70.7442	-70.0676	-69.9287	-70.5165	-69.5201
67.25	-69.3356	-69.8688	-70.5852	-70.0245	-69.7468	-70.5146	-69.5525
67.3	-69.3601	-69.906	-70.4218	-69.9396	-69.5935	-70.5458	-69.646
67.35	-69.3916	-69.9303	-70.3816	-69.8382	-69.5953	-70.5112	-69.7422
67.4	-69.43	-69.9666	-70.4728	-69.7569	-69.7373	-70.3956	-69.8029
67.45	-69.5103	-69.9878	-70.6094	-69.7083	-69.9037	-70.2909	-69.8468
67.5	-69.6235	-69.9859	-70.6962	-69.6958	-70.0253	-70.2516	-69.8703
67.55	-69.7144	-69.9951	-70.6848	-69.7079	-70.106	-70.2591	-69.8469
67.6	-69.7575	-70.0352	-70.5808	-69.7487	-70.1462	-70.2646	-69.7877
67.65	-69.7792	-70.0736	-70.4406	-69.8229	-70.1347	-70.2474	-69.719
67.7	-69.7942	-70.0512	-70.3499	-69.8771	-70.0576	-70.2248	-69.6653
67.75	-69.7745	-69.9744	-70.3304	-69.8643	-69.9217	-70.2009	-69.6678
67.8	-69.7096	-69.9047	-70.3319	-69.8071	-69.7634	-70.1688	-69.763
67.85	-69.6631	-69.8521	-70.3018	-69.7544	-69.668	-70.1281	-69.9082
67.9	-69.6869	-69.8114	-70.2475	-69.7377	-69.6974	-70.0642	-69.9787
67.95	-69.7662	-69.8045	-70.2131	-69.7687	-69.8357	-69.9774	-69.9311
68	-69.8328	-69.8071	-70.212	-69.8382	-69.9993	-69.905	-69.8703
68.05	-69.8457	-69.771	-70.2272	-69.8931	-70.1333	-69.8849	-69.8943
68.1	-69.792	-69.7043	-70.2318	-69.859	-70.2221	-69.9179	-69.9808
68.15	-69.688	-69.6445	-70.2209	-69.7548	-70.2602	-69.9643	-70.0537
68.2	-69.5833	-69.6437	-70.2239	-69.6637	-70.2518	-69.9834	-70.0911
68.25	-69.5418	-69.7234	-70.2574	-69.5893	-70.2564	-69.9802	-70.108
68.3	-69.5902	-69.8062	-70.2989	-69.5195	-70.3127	-69.9562	-70.0843
68.35	-69.6893	-69.8439	-70.2611	-69.5191	-70.3766	-69.8936	-70.0231
68.4	-69.7805	-69.896	-70.1016	-69.5868	-70.3689	-69.8469	-69.9772
68.45	-69.8127	-69.9612	-69.9312	-69.6337	-70.2883	-69.8843	-69.9795
68.5	-69.7701	-69.9538	-69.9056	-69.607	-70.1724	-69.957	-70.0497
68.55	-69.6862	-69.8848	-70.0376	-69.5592	-70.0359	-69.9536	-70.1807
68.6	-69.6304	-69.8402	-70.1816	-69.5652	-69.8906	-69.8337	-70.2797
68.65	-69.6524	-69.8298	-70.2336	-69.6281	-69.7941	-69.6974	-70.2403
68.7	-69.7185	-69.8266	-70.2345	-69.7084	-69.766	-69.6783	-70.067
68.75	-69.7637	-69.8343	-70.2629	-69.7776	-69.7671	-69.8159	-69.8775
68.8	-69.7469	-69.8519	-70.3349	-69.8317	-69.7913	-70.0422	-69.769
68.85	-69.6765	-69.8597	-70.3927	-69.8838	-69.8922	-70.2063	-69.7157
68.9	-69.5877	-69.8301	-70.3802	-69.9209	-70.0787	-70.2011	-69.6773
68.95	-69.5183	-69.7445	-70.3252	-69.9039	-70.2718	-70.0686	-69.6995
69	-69.5114	-69.6659	-70.3029	-69.8149	-70.4016	-69.9591	-69.7997
69.05	-69.5753	-69.6741	-70.3401	-69.7174	-70.4577	-69.9576	-69.8774
69.1	-69.6528	-69.7331	-70.3688	-69.6902	-70.4824	-70.0425	-69.8342
69.15	-69.6602	-69.7534	-70.3354	-69.7493	-70.488	-70.1591	-69.7062
69.2	-69.6002	-69.7226	-70.298	-69.838	-70.4444	-70.2413	-69.6409
69.25	-69.5644	-69.6794	-70.3211	-69.907	-70.3163	-70.2335	-69.7001
69.3	-69.5928	-69.6694	-70.3781	-69.9737	-70.1369	-70.1337	-69.7708
69.35	-69.6541	-69.7476	-70.4184	-70.0942	-69.9791	-70.0341	-69.7691
69.4	-69.7037	-69.8938	-70.427	-70.2603	-69.8928	-70.0271	-69.7684
69.45	-69.6912	-70.0157	-70.4084	-70.3477	-69.8674	-70.1144	-69.8046
69.5	-69.5658	-70.0151	-70.3583	-70.2758	-69.8618	-70.221	-69.8222
69.55	-69.3532	-69.884	-70.308	-70.126	-69.8608	-70.3133	-69.7818
69.6	-69.1918	-69.7072	-70.3262	-70.0643	-69.8945	-70.4093	-69.7012
69.65	-69.1832	-69.5889	-70.3921	-70.1344	-70.0095	-70.4618	-69.5826
69.7	-69.3092	-69.5748	-70.423	-70.2362	-70.1813	-70.3786	-69.4274
69.75	-69.4901	-69.6515	-70.4164	-70.277	-70.3056	-70.1614	-69.278
69.8	-69.6517	-69.7373	-70.4339	-70.2194	-70.2745	-69.946	-69.1965
69.85	-69.7425	-69.7392	-70.5075	-70.0765	-70.1139	-69.8397	-69.1797
69.9	-69.7149	-69.6251	-70.5845	-69.9088	-69.9646	-69.8449	-69.2014
69.95	-69.5723	-69.4545	-70.6139	-69.8138	-69.9178	-69.9264	-69.2613
70	-69.3902	-69.3067	-70.5984	-69.8299	-69.9391	-70.0724	-69.3707
70.05	-69.2581	-69.2649	-70.5746	-69.9048	-69.9578	-70.2526	-69.4994
70.1	-69.2328	-69.3845	-70.5493	-69.9808	-69.9554	-70.4115	-69.6132
70.15	-69.2984	-69.6397	-70.5147	-70.0218	-69.9267	-70.5094	-69.7188
70.2	-69.3942	-69.896	-70.4883	-69.9855	-69.8721	-70.5128	-69.8335
70.25	-69.4695	-70.0573	-70.5184	-69.861	-69.8106	-70.3927	-69.9374
70.3	-69.5142	-70.1617	-70.5983	-69.7438	-69.7736	-70.1577	-69.9808
70.35	-69.5665	-70.2745	-70.6543	-69.7376	-69.7456	-69.9027	-69.9398
70.4	-69.6427	-70.3575	-70.6383	-69.8053	-69.6757	-69.7452	-69.8172
70.45	-69.7053	-70.343	-70.5551	-69.8074	-69.57	-69.727	-69.6539
70.5	-69.7007	-70.2536	-70.427	-69.7135	-69.5046	-69.7792	-69.5099
70.55	-69.6152	-70.1272	-70.2728	-69.6084	-69.5754	-69.8336	-69.4386
70.6	-69.509	-69.954	-70.1751	-69.5488	-69.7984	-69.9008	-69.4416
70.65	-69.448	-69.7334	-70.2312	-69.5248	-70.0878	-69.9947	-69.5072
70.7	-69.4521	-69.5531	-70.4166	-69.536	-70.2836	-70.0756	-69.6507
70.75	-69.499	-69.5017	-70.5822	-69.5674	-70.2766	-70.0998	-69.8576
70.8	-69.5171	-69.5732	-70.5962	-69.5598	-70.1186	-70.0825	-70.028
70.85	-69.4649	-69.6584	-70.4831	-69.4637	-69.9748	-70.0473	-70.0305
70.9	-69.4047	-69.6748	-70.3609	-69.3427	-69.9699	-70.0064	-69.8846
70.95	-69.4293	-69.6333	-70.3073	-69.2951	-70.0754	-69.9596	-69.7381
71	-69.527	-69.5882	-70.3138	-69.3156	-70.1699	-69.9013	-69.7007
71.05	-69.5906	-69.5389	-70.3059	-69.3144	-70.1562	-69.8168	-69.7494
71.1	-69.5805	-69.4782	-70.2244	-69.2851	-70.0462	-69.7431	-69.8344
71.15	-69.5613	-69.4455	-70.0867	-69.3046	-69.9704	-69.738	-69.9352
71.2	-69.5765	-69.4795	-70.0059	-69.4056	-70.0516	-69.8182	-70.0412
71.25	-69.6219	-69.5457	-70.0824	-69.5503	-70.2626	-69.9131	-70.1262
71.3	-69.6901	-69.5969	-70.2472	-69.7029	-70.4287	-69.9611	-70.1812
71.35	-69.7617	-69.647	-70.3517	-69.8501	-70.4213	-69.9854	-70.213
71.4	-69.7941	-69.7087	-70.347	-69.97	-70.3052	-70.0642	-70.2377
71.45	-69.7482	-69.765	-70.3063	-70.0475	-70.2399	-70.2235	-70.2536
71.5	-69.668	-69.8174	-70.2868	-70.0702	-70.3012	-70.4127	-70.2674
71.55	-69.6403	-69.9086	-70.2531	-70.0386	-70.4114	-70.551	-70.2955
71.6	-69.6538	-70.0126	-70.1781	-69.9634	-70.466	-70.607	-70.3373
71.65	-69.6593	-70.0436	-70.0862	-69.8879	-70.4495	-70.606	-70.3557
71.7	-69.6905	-69.966	-70.0417	-69.847	-70.4003	-70.5831	-70.3353
71.75	-69.7963	-69.851	-70.0829	-69.84	-70.3378	-70.5288	-70.2825
71.8	-69.9523	-69.7814	-70.2066	-69.8315	-70.2414	-70.4155	-70.1822
71.85	-70.0735	-69.7598	-70.3682	-69.8275	-70.1243	-70.2684	-70.0152
71.9	-70.0864	-69.7478	-70.5158	-69.8452	-70.0484	-70.1629	-69.8448
71.95	-70.0131	-69.7281	-70.6099	-69.8549	-70.0518	-70.1436	-69.7547
72	-69.9253	-69.721	-70.6276	-69.8051	-70.1491	-70.1939	-69.7476
72.05	-69.8337	-69.7207	-70.5742	-69.714	-70.3093	-70.2797	-69.7578
72.1	-69.7152	-69.7094	-70.4854	-69.6567	-70.4451	-70.3769	-69.762
72.15	-69.6024	-69.6935	-70.3977	-69.6829	-70.4892	-70.4417	-69.7763
72.2	-69.5688	-69.6973	-70.3215	-69.7926	-70.4603	-70.4403	-69.784
72.25	-69.6255	-69.737	-70.2653	-69.9373	-70.411	-70.3882	-69.7481
72.3	-69.674	-69.8153	-70.2251	-70.0628	-70.3007	-70.3411	-69.6959
72.35	-69.6339	-69.9204	-70.1695	-70.1289	-70.0748	-70.3193	-69.7093
72.4	-69.5167	-69.9901	-70.0782	-70.1267	-69.8344	-70.3026	-69.7875
72.45	-69.344	-69.9568	-69.9906	-70.0628	-69.7487	-70.2675	-69.8442
72.5	-69.1702	-69.8185	-69.9625	-69.976	-69.8386	-70.2473	-69.8312
72.55	-69.1053	-69.6418	-70.0302	-69.8895	-69.9588	-70.2869	-69.7904
72.6	-69.1511	-69.5265	-70.1846	-69.7975	-69.9928	-70.3766	-69.7314
72.65	-69.2043	-69.5384	-70.3521	-69.7283	-69.972	-70.4409	-69.6387
72.7	-69.2437	-69.6706	-70.4422	-69.7607	-69.936	-70.455	-69.5488
72.75	-69.2987	-69.8127	-70.4487	-69.8985	-69.8698	-70.4687	-69.5308
72.8	-69.3332	-69.8387	-70.4301	-70.0365	-69.801	-70.5206	-69.5764
72.85	-69.314	-69.7265	-70.4179	-70.1219	-69.7979	-70.5597	-69.6237
72.9	-69.2667	-69.5647	-70.3921	-70.1943	-69.865	-70.5288	-69.635
72.95	-69.2259	-69.4794	-70.3536	-70.2782	-69.9271	-70.4272	-69.6077
73	-69.2149	-69.5433	-70.3377	-70.3143	-69.9442	-70.2968	-69.5633
73.05	-69.2339	-69.7363	-70.3518	-70.2505	-69.9531	-70.1813	-69.532
73.1	-69.2572	-69.9238	-70.3602	-70.0975	-69.9602	-70.1264	-69.5585
73.15	-69.2975	-69.9726	-70.3599	-69.9035	-69.9449	-70.151	-69.6591
73.2	-69.3702	-69.9045	-70.3926	-69.7355	-69.9171	-70.2029	-69.8167
73.25	-69.4072	-69.8802	-70.4622	-69.6678	-69.8788	-70.2206	-69.9763
73.3	-69.3703	-70.0137	-70.5096	-69.7441	-69.8468	-70.2074	-70.0844
73.35	-69.3186	-70.2166	-70.4886	-69.8842	-69.8837	-70.2188	-70.0923
73.4	-69.2787	-70.3194	-70.4355	-69.9466	-70.0127	-70.2662	-70.0008
73.45	-69.2231	-70.2642	-70.4052	-69.878	-70.1592	-70.3234	-69.8878
73.5	-69.1529	-70.1149	-70.4116	-69.7575	-70.2251	-70.3616	-69.8386
73.55	-69.0493	-69.9688	-70.4518	-69.6802	-70.2012	-70.3723	-69.8643
73.6	-68.8859	-69.8863	-70.5307	-69.6784	-70.1493	-70.3178	-69.9088
73.65	-68.7384	-69.8861	-70.6015	-69.7426	-70.1063	-70.1724	-69.9452
73.7	-68.69	-69.9391	-70.6014	-69.8137	-70.1074	-69.975	-69.9816
73.75	-68.67	-69.9869	-70.5403	-69.81	-70.1946	-69.8133	-70.014
73.8	-68.6018	-70.0005	-70.4945	-69.6957	-70.2955	-69.7304	-70.016
73.85	-68.5451	-69.9893	-70.4689	-69.5386	-70.2947	-69.709	-69.9894
73.9	-68.5339	-69.9663	-70.4261	-69.462	-70.199	-69.7516	-69.9678
73.95	-68.5274	-69.902	-70.3834	-69.5009	-70.094	-69.8722	-69.9624
74	-68.5522	-69.7911	-70.4024	-69.5871	-70.0546	-70.0369	-69.9796
74.05	-68.6434	-69.7118	-70.4541	-69.6469	-70.1088	-70.1492	-70.0283
74.1	-68.7118	-69.7135	-70.4614	-69.6654	-70.2163	-70.1409	-70.0972
74.15	-68.6829	-69.7294	-70.4042	-69.6589	-70.3426	-70.0119	-70.1262
74.2	-68.6041	-69.6897	-70.3274	-69.651	-70.466	-69.8188	-70.0789
74.25	-68.5044	-69.6598	-70.2478	-69.6745	-70.526	-69.6635	-70.0134
74.3	-68.3685	-69.7609	-70.156	-69.7084	-70.4894	-69.6444	-70.0187
74.35	-68.2466	-69.9476	-70.0719	-69.703	-70.4146	-69.7796	-70.1037
74.4	-68.1954	-70.0537	-70.0272	-69.6586	-70.3659	-69.9726	-70.1492
74.45	-68.1865	-70.0163	-70.0148	-69.6299	-70.3717	-70.1238	-70.0642
74.5	-68.1873	-69.9127	-70.0008	-69.6605	-70.4498	-70.2036	-69.9046
74.55	-68.1965	-69.8142	-69.9987	-69.7328	-70.569	-70.2059	-69.7872
74.6	-68.1693	-69.7014	-70.0568	-69.8141	-70.6727	-70.1203	-69.7626
74.65	-68.0754	-69.5795	-70.206	-69.8907	-70.6729	-70.0007	-69.8062
74.7	-67.9679	-69.5382	-70.4084	-69.9498	-70.5139	-69.9618	-69.8782
74.75	-67.8869	-69.6018	-70.5912	-70.0011	-70.2502	-70.0359	-69.9097
74.8	-67.8143	-69.6841	-70.6694	-70.0679	-70.0182	-70.1491	-69.8489
74.85	-67.7221	-69.7033	-70.6126	-70.1487	-69.8961	-70.234	-69.7448
74.9	-67.6416	-69.6842	-70.4698	-70.2198	-69.8774	-70.2945	-69.6936
74.95	-67.5852	-69.6934	-70.3185	-70.2751	-69.9185	-70.3401	-69.7141
75	-67.5057	-69.7233	-70.2008	-70.3414	-69.9789	-70.3418	-69.7281
75.05	-67.3688	-69.7516	-70.1457	-70.3931	-69.9908	-70.2925	-69.6908
75.1	-67.2182	-69.8067	-70.2012	-70.3696	-69.8988	-70.2276	-69.6652
75.15	-67.0744	-69.8982	-70.3575	-70.2766	-69.722	-70.1884	-69.7044
75.2	-66.8959	-70.002	-70.5097	-70.1896	-69.5613	-70.1718	-69.7791
75.25	-66.6518	-70.0955	-70.5509	-70.1524	-69.4859	-70.1641	-69.8154
75.3	-66.4021	-70.1502	-70.498	-70.109	-69.5083	-70.1661	-69.7941
75.35	-66.2142	-70.1373	-70.4176	-70.0085	-69.6174	-70.1684	-69.7428
75.4	-66.1057	-70.0399	-70.3347	-69.9199	-69.7947	-70.1648	-69.6645
75.45	-66.0837	-69.8888	-70.2545	-69.9163	-69.992	-70.1878	-69.5789
75.5	-66.1649	-69.7506	-70.2182	-69.9462	-70.1368	-70.2814	-69.5308
75.55	-66.2918	-69.6603	-70.2698	-69.9113	-70.1927	-70.419	-69.5288
75.6	-66.3741	-69.632	-70.3714	-69.8304	-70.1388	-70.5144	-69.5409
75.65	-66.4015	-69.6687	-70.4354	-69.8182	-69.9647	-70.5306	-69.544
75.7	-66.4533	-69.7153	-70.427	-69.8732	-69.7242	-70.4826	-69.5458
75.75	-66.5453	-69.7275	-70.3922	-69.8857	-69.576	-70.3791	-69.5475
75.8	-66.6193	-69.7317	-70.3424	-69.8472	-69.6286	-70.2346	-69.5582
75.85	-66.6508	-69.7507	-70.2478	-69.8539	-69.8337	-70.114	-69.618
75.9	-66.6669	-69.7628	-70.1598	-69.9408	-70.0577	-70.101	-69.7136
75.95	-66.6502	-69.7316	-70.1613	-70.0524	-70.2053	-70.1745	-69.7671
76	-66.569	-69.6477	-70.2288	-70.1473	-70.2536	-70.2153	-69.7387
76.05	-66.457	-69.543	-70.241	-70.2287	-70.2021	-70.179	-69.687
76.1	-66.3795	-69.4273	-70.16	-70.2465	-70.0513	-70.1159	-69.6995
76.15	-66.3349	-69.2752	-70.0818	-70.1261	-69.8277	-70.0646	-69.7667
76.2	-66.2934	-69.1307	-70.0763	-69.8877	-69.6246	-70.045	-69.8199
76.25	-66.2385	-69.071	-70.1138	-69.6513	-69.5294	-70.0594	-69.8512
76.3	-66.1622	-69.0871	-70.1351	-69.5397	-69.5569	-70.0997	-69.8784
76.35	-66.0487	-69.1209	-70.1335	-69.5777	-69.6478	-70.149	-69.8879
76.4	-65.9035	-69.1274	-70.0919	-69.6811	-69.7458	-70.146	-69.8671
76.45	-65.7456	-69.0779	-69.9712	-69.772	-69.8147	-70.0427	-69.8445
76.5	-65.596	-68.985	-69.8256	-69.8056	-69.8558	-69.921	-69.8517
76.55	-65.5034	-68.8703	-69.777	-69.7263	-69.881	-69.8743	-69.8698
76.6	-65.5162	-68.7506	-69.8578	-69.5607	-69.8857	-69.8557	-69.8898
76.65	-65.6255	-68.6888	-69.9603	-69.4478	-69.8497	-69.8022	-69.9439
76.7	-65.7472	-68.7078	-69.9879	-69.4715	-69.8048	-69.7555	-70.0051
76.75	-65.8046	-68.7103	-69.9788	-69.6026	-69.8199	-69.7695	-70.0163
76.8	-65.763	-68.6503	-70.0153	-69.7605	-69.9313	-69.8144	-69.9949
76.85	-65.62	-68.5904	-70.1136	-69.8805	-70.0964	-69.8248	-69.9976
76.9	-65.4218	-68.5269	-70.2225	-69.9493	-70.2541	-69.8106	-70.0351
76.95	-65.2716	-68.4339	-70.282	-69.991	-70.3844	-69.8085	-70.076
77	-65.2631	-68.376	-70.2928	-70.0506	-70.4838	-69.8008	-70.1001
77.05	-65.3366	-68.3878	-70.3019	-70.1387	-70.5529	-69.7737	-70.1175
77.1	-65.3255	-68.3949	-70.3463	-70.2236	-70.608	-69.739	-70.1259
77.15	-65.1464	-68.3347	-70.3933	-70.2914	-70.6849	-69.7171	-70.1134
77.2	-64.9019	-68.2127	-70.3836	-70.3641	-70.7778	-69.7174	-70.1133
77.25	-64.7683	-68.081	-70.3237	-70.4439	-70.8362	-69.7562	-70.1597
77.3	-64.7984	-67.9876	-70.2688	-70.4938	-70.8002	-69.8208	-70.2259
77.35	-64.8995	-67.9102	-70.2513	-70.4934	-70.6621	-69.8429	-70.2446
77.4	-64.9515	-67.8034	-70.275	-70.438	-70.4598	-69.7809	-70.1734
77.45	-64.9211	-67.7111	-70.3323	-70.3201	-70.2697	-69.665	-70.0564
77.5	-64.8416	-67.6856	-70.4059	-70.144	-70.1629	-69.5697	-69.9748
77.55	-64.7539	-67.6599	-70.4497	-69.991	-70.1586	-69.5487	-69.9314
77.6	-64.7018	-67.5818	-70.4412	-69.9516	-70.2115	-69.6197	-69.9016
77.65	-64.6809	-67.516	-70.4191	-70.0336	-70.2568	-69.7655	-69.8941
77.7	-64.6114	-67.5048	-70.4032	-70.1585	-70.2915	-69.9328	-69.8555
77.75	-64.4369	-67.5213	-70.363	-70.2365	-70.3593	-70.0613	-69.7221
77.8	-64.2406	-67.5162	-70.2809	-70.2174	-70.4702	-70.1118	-69.5695
77.85	-64.1752	-67.4597	-70.1776	-70.0839	-70.5676	-70.077	-69.5448
77.9	-64.2415	-67.3337	-70.086	-69.8972	-70.6241	-69.9606	-69.6766
77.95	-64.2803	-67.1632	-70.0085	-69.7777	-70.6485	-69.8321	-69.8275
78	-64.1647	-66.9992	-69.9629	-69.8103	-70.6173	-69.7972	-69.895
78.05	-63.9516	-66.8567	-70.0142	-69.9568	-70.4884	-69.8898	-69.9157
78.1	-63.8006	-66.7083	-70.149	-70.0924	-70.3167	-70.031	-69.9482
78.15	-63.7895	-66.5849	-70.244	-70.1369	-70.2334	-70.1372	-69.9688
78.2	-63.876	-66.5366	-70.1791	-70.0786	-70.2667	-70.1999	-69.9737
78.25	-63.9619	-66.5429	-69.9854	-69.9482	-70.3382	-70.2323	-70.0053
78.3	-63.9681	-66.5399	-69.7997	-69.7959	-70.3863	-70.2246	-70.067
78.35	-63.8879	-66.537	-69.7083	-69.7056	-70.4279	-70.1569	-70.1012
78.4	-63.7758	-66.5602	-69.6844	-69.7441	-70.45	-70.0698	-70.0813
78.45	-63.6939	-66.5792	-69.6743	-69.9014	-70.3917	-70.0262	-70.0337
78.5	-63.6404	-66.5583	-69.635	-70.0977	-70.239	-70.0549	-69.9637
78.55	-63.5836	-66.5427	-69.5243	-70.2529	-70.0607	-70.1248	-69.8622
78.6	-63.5538	-66.5778	-69.3275	-70.3237	-69.9298	-70.2163	-69.7535
78.65	-63.5992	-66.6253	-69.1407	-70.273	-69.8795	-70.3356	-69.667
78.7	-63.6988	-66.6252	-69.0989	-70.0938	-69.9324	-70.4615	-69.5666
78.75	-63.7577	-66.5886	-69.2224	-69.8706	-70.0678	-70.524	-69.4439
78.8	-63.7261	-66.5534	-69.3982	-69.7575	-70.1975	-70.4628	-69.3842
78.85	-63.6681	-66.4767	-69.503	-69.8038	-70.2291	-70.297	-69.4595
78.9	-63.6559	-66.2985	-69.5029	-69.9058	-70.169	-70.0916	-69.6239
78.95	-63.6706	-66.0368	-69.392	-69.9463	-70.1074	-69.9267	-69.7645
79	-63.6351	-65.7982	-69.1968	-69.9294	-70.1178	-69.8633	-69.8298
79.05	-63.5188	-65.656	-69.0221	-69.9056	-70.1809	-69.9348	-69.8216
79.1	-63.3912	-65.6175	-68.9837	-69.8964	-70.2045	-70.078	-69.7694
79.15	-63.3136	-65.658	-69.0465	-69.9061	-70.147	-70.1809	-69.7222
79.2	-63.2769	-65.7626	-69.0528	-69.9297	-70.0536	-70.2072	-69.7427
79.25	-63.2495	-65.8752	-68.9633	-69.9109	-69.9964	-70.2118	-69.8327
79.3	-63.225	-65.9259	-68.8858	-69.7963	-70.0161	-70.2098	-69.9188
79.35	-63.2343	-65.8859	-68.8719	-69.6427	-70.0964	-70.1603	-69.9366
79.4	-63.2824	-65.7803	-68.8398	-69.5711	-70.1999	-70.0722	-69.8934
79.45	-63.3393	-65.6136	-68.7069	-69.6099	-70.2708	-69.993	-69.8338
79.5	-63.3955	-65.3836	-68.4991	-69.679	-70.2634	-69.9266	-69.7883
79.55	-63.4442	-65.1378	-68.267	-69.734	-70.1699	-69.8427	-69.7785
79.6	-63.4669	-64.9614	-68.0125	-69.7966	-70.0374	-69.7575	-69.763
79.65	-63.4558	-64.8766	-67.7469	-69.8736	-69.9441	-69.7049	-69.6543
79.7	-63.4149	-64.8385	-67.5201	-69.9135	-69.9265	-69.6851	-69.4352
79.75	-63.359	-64.8313	-67.4156	-69.899	-69.9702	-69.6615	-69.2201
79.8	-63.2927	-64.8747	-67.4793	-69.8578	-70.0422	-69.6282	-69.1181
79.85	-63.2107	-64.9554	-67.6972	-69.8157	-70.1291	-69.6043	-69.1291
79.9	-63.1204	-64.995	-68.0057	-69.7539	-70.2258	-69.6005	-69.1819
79.95	-63.0463	-64.9698	-68.2775	-69.6635	-70.3098	-69.5951	-69.2515
80	-63.0316	-64.9227	-68.3835	-69.551	-70.3767	-69.5999	-69.3587
80.05	-63.0725	-64.8751	-68.2868	-69.4353	-70.43	-69.6442	-69.5018
80.1	-63.0769	-64.7932	-68.0744	-69.3425	-70.4412	-69.7381	-69.6178
80.15	-63.0167	-64.6825	-67.8596	-69.3183	-70.391	-69.8492	-69.664
80.2	-62.9902	-64.636	-67.7114	-69.3818	-70.3114	-69.9541	-69.6718
80.25	-63.048	-64.7409	-67.6485	-69.4897	-70.2523	-70.0385	-69.6993
80.3	-63.1248	-64.9785	-67.6649	-69.5768	-70.1859	-70.0898	-69.7706
80.35	-63.1448	-65.2062	-67.7407	-69.6047	-70.0542	-70.0829	-69.8768
80.4	-63.0937	-65.289	-67.8449	-69.5816	-69.9085	-70.03	-69.9989
80.45	-63.005	-65.185	-67.921	-69.5367	-69.8739	-69.9746	-70.0931
80.5	-62.9296	-64.9519	-67.8972	-69.5218	-70.0053	-69.9745	-70.1229
80.55	-62.9267	-64.7002	-67.7623	-69.5717	-70.2203	-70.0445	-70.0918
80.6	-63.0289	-64.525	-67.6034	-69.6752	-70.3907	-70.1339	-70.052
80.65	-63.1534	-64.4731	-67.4985	-69.7719	-70.4738	-70.1534	-70.0377
80.7	-63.1702	-64.5288	-67.3999	-69.8113	-70.4864	-70.0873	-70.0541
80.75	-63.0704	-64.6513	-67.2312	-69.7754	-70.444	-69.997	-70.0874
80.8	-62.9557	-64.7772	-67.033	-69.6866	-70.3628	-69.9357	-70.1224
80.85	-62.9051	-64.8434	-66.9221	-69.5721	-70.2823	-69.8824	-70.1048
80.9	-62.9106	-64.8255	-66.9226	-69.4541	-70.2359	-69.8288	-69.9928
80.95	-62.9096	-64.7547	-66.9537	-69.377	-70.1816	-69.8142	-69.8277
81	-62.8766	-64.6855	-66.9602	-69.3758	-70.0783	-69.8531	-69.7098
81.05	-62.8414	-64.6225	-66.9576	-69.4257	-69.9825	-69.8814	-69.6844
81.1	-62.8214	-64.5467	-66.963	-69.4547	-69.9603	-69.8425	-69.7268
81.15	-62.8363	-64.4476	-66.9725	-69.437	-69.9991	-69.7385	-69.818
81.2	-62.9349	-64.3328	-66.9778	-69.374	-70.0498	-69.6133	-69.9458
81.25	-63.0963	-64.2189	-66.949	-69.2776	-70.0868	-69.5296	-70.0635
81.3	-63.2414	-64.1441	-66.8245	-69.183	-70.108	-69.549	-70.0891
81.35	-63.3497	-64.1587	-66.5991	-69.1118	-70.0827	-69.6795	-70.0148
81.4	-63.4115	-64.2371	-66.3734	-69.0327	-69.9995	-69.8563	-69.9148
81.45	-63.3915	-64.2963	-66.2671	-68.9421	-69.9336	-70.007	-69.8356
81.5	-63.3292	-64.2842	-66.2955	-68.9271	-69.9531	-70.108	-69.7148
81.55	-63.2894	-64.2148	-66.3786	-69.006	-70.0229	-70.1953	-69.5137
81.6	-63.2491	-64.1317	-66.4464	-69.0506	-70.056	-70.2889	-69.3287
81.65	-63.2079	-64.0667	-66.486	-68.9308	-70.0176	-70.3758	-69.2865
81.7	-63.2425	-64.0495	-66.5202	-68.6861	-69.973	-70.4319	-69.3992
81.75	-63.3447	-64.0781	-66.5617	-68.481	-69.9896	-70.4752	-69.5789
81.8	-63.4325	-64.1268	-66.5929	-68.4246	-70.0546	-70.5184	-69.7404
81.85	-63.4969	-64.1877	-66.5731	-68.5027	-70.1294	-70.5266	-69.8205
81.9	-63.5522	-64.2906	-66.4698	-68.6213	-70.1862	-70.4292	-69.7966
81.95	-63.5775	-64.4458	-66.2867	-68.6894	-70.2101	-70.2217	-69.709
82	-63.5849	-64.5396	-66.0852	-68.6365	-70.2038	-69.9876	-69.6335
82.05	-63.6055	-64.4178	-65.9298	-68.4577	-70.169	-69.7985	-69.5837
82.1	-63.6312	-64.072	-65.8338	-68.2636	-70.112	-69.6684	-69.5315
82.15	-63.6694	-63.6806	-65.778	-68.1864	-70.0566	-69.6038	-69.5203
82.2	-63.7518	-63.4499	-65.7733	-68.2246	-70.0005	-69.6424	-69.6079
82.25	-63.8465	-63.4236	-65.8186	-68.2236	-69.9444	-69.7623	-69.7515
82.3	-63.9138	-63.5008	-65.8521	-68.0839	-69.9142	-69.8755	-69.83
82.35	-63.9866	-63.5717	-65.7895	-67.8808	-69.9221	-69.9132	-69.798
82.4	-64.0739	-63.6015	-65.6442	-67.7216	-69.9715	-69.9083	-69.7085
82.45	-64.1079	-63.6267	-65.5044	-67.6191	-70.0588	-69.9044	-69.6416
82.5	-64.1141	-63.6735	-65.4181	-67.536	-70.1329	-69.887	-69.6509
82.55	-64.1989	-63.7164	-65.3313	-67.4577	-70.1705	-69.8644	-69.7377
82.6	-64.3332	-63.6883	-65.1826	-67.3733	-70.2123	-69.893	-69.8627
82.65	-64.4025	-63.5626	-64.9699	-67.2918	-70.2524	-69.9783	-69.9538
82.7	-64.4181	-63.421	-64.76	-67.2684	-70.2421	-70.026	-69.9567
82.75	-64.4429	-63.3482	-64.6425	-67.3115	-70.1961	-69.9699	-69.8568
82.8	-64.4527	-63.3374	-64.6684	-67.3641	-70.1549	-69.8163	-69.6909
82.85	-64.438	-63.3484	-64.7766	-67.3481	-70.1383	-69.6025	-69.5472
82.9	-64.4788	-63.3874	-64.8352	-67.2454	-70.1665	-69.409	-69.5238
82.95	-64.597	-63.4725	-64.7996	-67.1032	-70.2477	-69.353	-69.6585
83	-64.6945	-63.5483	-64.7629	-66.9761	-70.3803	-69.4815	-69.8535
83.05	-64.6711	-63.5586	-64.8278	-66.9001	-70.4916	-69.6869	-69.961
83.1	-64.582	-63.5516	-64.9748	-66.862	-70.4766	-69.8437	-69.9342
83.15	-64.5843	-63.5893	-65.12	-66.8282	-70.3147	-69.9415	-69.8439
83.2	-64.7134	-63.6565	-65.2004	-66.8159	-70.1344	-70.0438	-69.7778
83.25	-64.8674	-63.7206	-65.2022	-66.8593	-70.0609	-70.1517	-69.7486
83.3	-64.9689	-63.7963	-65.111	-66.9347	-70.0907	-70.2077	-69.7273
83.35	-65.0301	-63.889	-64.9332	-66.9556	-70.1279	-70.1984	-69.6912
83.4	-65.0438	-63.9462	-64.7097	-66.8846	-70.1368	-70.1754	-69.6473
83.45	-64.9908	-63.9354	-64.4846	-66.8132	-70.1366	-70.1696	-69.625
83.5	-64.9272	-63.9054	-64.3092	-66.8139	-70.1165	-70.1457	-69.6405
83.55	-64.9628	-63.8755	-64.2497	-66.8225	-70.0087	-70.0784	-69.6859
83.6	-65.1044	-63.8179	-64.3367	-66.731	-69.7946	-69.974	-69.7127
83.65	-65.267	-63.7571	-64.4818	-66.5454	-69.5756	-69.8715	-69.6785
83.7	-65.3838	-63.7721	-64.574	-66.363	-69.4442	-69.8112	-69.6337
83.75	-65.4547	-63.8783	-64.5891	-66.2125	-69.3816	-69.7758	-69.655
83.8	-65.4764	-63.9924	-64.5803	-66.0708	-69.3095	-69.7159	-69.726
83.85	-65.4497	-64.0657	-64.5612	-65.9846	-69.2389	-69.6428	-69.7419
83.9	-65.421	-64.1391	-64.4989	-66.0037	-69.2062	-69.6525	-69.6676
83.95	-65.4531	-64.2154	-64.3979	-66.0923	-69.1941	-69.7839	-69.6074
84	-65.5355	-64.2514	-64.3118	-66.1827	-69.1615	-69.9477	-69.6476
84.05	-65.6056	-64.256	-64.2946	-66.2701	-69.1288	-70.0789	-69.7466
84.1	-65.6377	-64.2598	-64.3406	-66.3559	-69.1105	-70.1954	-69.7923
84.15	-65.6702	-64.2766	-64.3993	-66.3469	-69.062	-70.2933	-69.7382
84.2	-65.7472	-64.3112	-64.3967	-66.1829	-68.9542	-70.314	-69.6384
84.25	-65.8822	-64.3587	-64.3013	-65.9609	-68.8027	-70.23	-69.5557
84.3	-66.0591	-64.4163	-64.176	-65.8014	-68.6264	-70.1179	-69.5155
84.35	-66.2426	-64.4632	-64.1274	-65.7087	-68.4247	-70.0714	-69.5112
84.4	-66.3901	-64.4618	-64.2019	-65.6243	-68.2485	-70.086	-69.512
84.45	-66.4724	-64.4461	-64.3148	-65.5534	-68.1548	-70.1056	-69.5072
84.5	-66.4865	-64.4681	-64.3456	-65.5577	-68.138	-70.1104	-69.5194
84.55	-66.4595	-64.4921	-64.2502	-65.6181	-68.1356	-70.1167	-69.5771
84.6	-66.4233	-64.4722	-64.0806	-65.6375	-68.1239	-70.1499	-69.6647
84.65	-66.4108	-64.4207	-63.919	-65.5663	-68.1115	-70.191	-69.7009
84.7	-66.4324	-64.3645	-63.8203	-65.4288	-68.0849	-70.2096	-69.6586
84.75	-66.4948	-64.3427	-63.8166	-65.2853	-68.0042	-70.2277	-69.6142
84.8	-66.6004	-64.3895	-63.8716	-65.1851	-67.8974	-70.2377	-69.6303
84.85	-66.7351	-64.499	-63.8861	-65.1177	-67.8395	-70.1645	-69.6729
84.9	-66.8546	-64.6694	-63.813	-65.0743	-67.8661	-69.9998	-69.6701
84.95	-66.9282	-64.874	-63.7166	-65.0625	-67.9388	-69.8117	-69.6232
85	-66.9923	-65.0137	-63.6858	-65.024	-68.0263	-69.6168	-69.6044
85.05	-67.1	-65.0513	-63.6984	-64.9175	-68.0823	-69.4403	-69.6467
85.1	-67.2452	-65.0657	-63.6684	-64.8066	-68.0381	-69.3723	-69.7398
85.15	-67.3368	-65.078	-63.5819	-64.7713	-67.8783	-69.4615	-69.8526
85.2	-67.308	-65.0499	-63.5032	-64.8185	-67.6892	-69.6147	-69.9188
85.25	-67.1867	-65.0102	-63.4865	-64.8806	-67.5264	-69.6697	-69.9021
85.3	-67.0669	-64.9996	-63.4908	-64.9082	-67.3639	-69.5991	-69.8503
85.35	-67.0456	-64.9928	-63.4615	-64.8797	-67.2074	-69.5294	-69.8316
85.4	-67.1633	-64.9623	-63.4403	-64.7924	-67.1359	-69.5567	-69.8681
85.45	-67.392	-64.9104	-63.5089	-64.6683	-67.1722	-69.6248	-69.9274
85.5	-67.6306	-64.8732	-63.6787	-64.5738	-67.2591	-69.619	-69.9485
85.55	-67.7715	-64.9146	-63.8585	-64.5537	-67.3719	-69.5337	-69.8836
85.6	-67.7756	-65.0343	-63.9505	-64.5981	-67.501	-69.4351	-69.7361
85.65	-67.7086	-65.1578	-63.9531	-64.6825	-67.5895	-69.3786	-69.5964
85.7	-67.6991	-65.2545	-63.936	-64.788	-67.5618	-69.3968	-69.5717
85.75	-67.7835	-65.3354	-63.9477	-64.8651	-67.4411	-69.4836	-69.6383
85.8	-67.8757	-65.3731	-63.9332	-64.8391	-67.3224	-69.5862	-69.6992
85.85	-67.884	-65.3765	-63.8338	-64.6978	-67.2697	-69.6275	-69.7471
85.9	-67.8154	-65.4231	-63.7154	-64.4972	-67.2447	-69.5733	-69.8204
85.95	-67.7563	-65.5079	-63.6839	-64.3346	-67.1858	-69.4292	-69.9195
86	-67.7812	-65.5619	-63.747	-64.2681	-67.0774	-69.2484	-70.027
86.05	-67.9248	-65.5875	-63.8379	-64.2927	-66.9412	-69.0906	-70.1016
86.1	-68.1544	-65.6444	-63.9405	-64.362	-66.8057	-68.9844	-70.1066
86.15	-68.3741	-65.7589	-64.0822	-64.4212	-66.7195	-68.9322	-70.0567
86.2	-68.5191	-65.9058	-64.1886	-64.4366	-66.7317	-68.954	-69.9951
86.25	-68.6204	-66.0852	-64.1738	-64.3903	-66.8012	-69.0718	-69.9698
86.3	-68.7476	-66.3101	-64.1113	-64.2889	-66.8421	-69.2139	-69.9783
86.35	-68.8589	-66.5432	-64.1039	-64.179	-66.8293	-69.2337	-69.9726
86.4	-68.854	-66.7004	-64.1358	-64.1628	-66.7977	-69.0641	-69.9102
86.45	-68.7483	-66.7568	-64.1394	-64.2671	-66.7202	-68.8416	-69.8273
86.5	-68.6689	-66.7596	-64.1422	-64.3717	-66.5388	-68.7422	-69.7976
86.55	-68.696	-66.7777	-64.2091	-64.3537	-66.2772	-68.7868	-69.8441
86.6	-68.7675	-66.8531	-64.306	-64.2131	-66.0452	-68.862	-69.9291
86.65	-68.797	-66.9714	-64.3714	-64.0329	-65.9288	-68.8894	-70.0436
86.7	-68.7957	-67.056	-64.4236	-63.8834	-65.9159	-68.8449	-70.1938
86.75	-68.8178	-67.043	-64.512	-63.8155	-65.9559	-68.7018	-70.3162
86.8	-68.882	-66.9677	-64.6122	-63.8421	-65.9972	-68.4774	-70.3288
86.85	-68.9663	-66.8946	-64.6648	-63.9394	-65.9958	-68.2597	-70.2155
86.9	-69.0603	-66.8562	-64.6835	-64.0557	-65.8975	-68.1341	-70.0229
86.95	-69.166	-66.864	-64.7122	-64.1425	-65.7005	-68.0657	-69.7782
87	-69.2575	-66.9536	-64.7297	-64.1854	-65.4805	-67.9681	-69.534
87.05	-69.3335	-67.1163	-64.6604	-64.2036	-65.3247	-67.8349	-69.393
87.1	-69.4125	-67.2889	-64.5088	-64.1988	-65.2752	-67.7668	-69.4353
87.15	-69.4965	-67.4178	-64.3704	-64.1662	-65.3097	-67.8227	-69.6091
87.2	-69.581	-67.5261	-64.3451	-64.1433	-65.378	-67.9528	-69.7677
87.25	-69.6596	-67.6316	-64.4607	-64.1786	-65.4076	-68.0808	-69.8123
87.3	-69.7281	-67.6879	-64.6634	-64.2431	-65.3469	-68.1647	-69.7319
87.35	-69.796	-67.669	-64.8459	-64.2524	-65.1949	-68.1639	-69.5641
87.4	-69.8999	-67.6541	-64.8987	-64.1697	-65.0031	-68.0425	-69.3638
87.45	-70.0656	-67.7282	-64.8261	-64.0557	-64.8501	-67.8486	-69.2226
87.5	-70.2267	-67.8633	-64.7423	-63.9674	-64.7684	-67.6632	-69.2007
87.55	-70.2919	-67.9762	-64.7229	-63.8918	-64.7484	-67.5145	-69.2755
87.6	-70.2724	-68.0549	-64.7242	-63.8073	-64.7542	-67.3595	-69.3872
87.65	-70.2427	-68.1434	-64.6711	-63.7684	-64.7495	-67.2016	-69.5055
87.7	-70.2341	-68.228	-64.6006	-63.7972	-64.7127	-67.1146	-69.6097
87.75	-70.2259	-68.2562	-64.609	-63.8174	-64.67	-67.1506	-69.6525
87.8	-70.2296	-68.2686	-64.6905	-63.7577	-64.6837	-67.2674	-69.6112
87.85	-70.2723	-68.364	-64.7574	-63.6658	-64.7576	-67.4058	-69.5321
87.9	-70.3006	-68.5568	-64.7819	-63.5862	-64.8322	-67.5332	-69.4902
87.95	-70.2766	-68.7561	-64.8544	-63.4939	-64.8596	-67.5898	-69.4731
88	-70.2824	-68.8904	-65.0225	-63.3755	-64.8153	-67.4938	-69.3937
88.05	-70.4036	-68.9446	-65.1896	-63.2968	-64.718	-67.2566	-69.2276
88.1	-70.5974	-68.9147	-65.2512	-63.2851	-64.6341	-66.9896	-69.0888
88.15	-70.7465	-68.7802	-65.2066	-63.2875	-64.6415	-66.7795	-69.0764
88.2	-70.8284	-68.5762	-65.1569	-63.2644	-64.7247	-66.6515	-69.1537
88.25	-70.9248	-68.4101	-65.2008	-63.243	-64.7875	-66.6113	-69.2118
88.3	-71.065	-68.3588	-65.3524	-63.2479	-64.783	-66.6408	-69.1989
88.35	-71.1904	-68.4064	-65.5339	-63.2609	-64.7365	-66.6692	-69.1323
88.4	-71.251	-68.5042	-65.643	-63.29	-64.663	-66.6285	-69.0591
88.45	-71.2403	-68.6559	-65.6573	-63.3832	-64.5402	-66.5053	-69.0107
88.5	-71.2025	-68.8476	-65.6388	-63.5657	-64.3979	-66.3348	-68.98
88.55	-71.197	-69.008	-65.6433	-63.779	-64.3274	-66.1447	-68.9614
88.6	-71.2301	-69.0737	-65.6616	-63.959	-64.3553	-65.958	-68.9891
88.65	-71.2945	-69.0534	-65.6965	-64.0748	-64.4146	-65.8226	-69.0946
88.7	-71.3796	-69.0088	-65.779	-64.133	-64.4272	-65.7738	-69.2274
88.75	-71.4364	-69.0179	-65.9029	-64.1282	-64.3886	-65.7767	-69.3066
88.8	-71.4542	-69.1533	-66.0135	-64.0774	-64.3669	-65.7725	-69.3016
88.85	-71.4983	-69.3898	-66.1161	-64.0105	-64.3978	-65.7564	-69.2497
88.9	-71.5828	-69.6134	-66.2613	-63.941	-64.4608	-65.7582	-69.177
88.95	-71.645	-69.718	-66.4397	-63.8532	-64.513	-65.7579	-69.0891
89	-71.6292	-69.6973	-66.5756	-63.7433	-64.5195	-65.7078	-69.0036
89.05	-71.5502	-69.6168	-66.658	-63.6553	-64.4762	-65.6063	-68.9556
89.1	-71.4795	-69.5597	-66.745	-63.6762	-64.3889	-65.4975	-68.927
89.15	-71.4566	-69.6006	-66.8574	-63.8726	-64.2714	-65.4335	-68.8572
89.2	-71.4679	-69.7571	-66.9359	-64.1704	-64.1435	-65.4606	-68.7219
89.25	-71.5217	-69.9648	-66.9393	-64.3938	-64.0246	-65.5788	-68.5673
89.3	-71.6048	-70.1194	-66.8965	-64.4397	-63.971	-65.709	-68.4547
89.35	-71.6504	-70.185	-66.88	-64.387	-64.0241	-65.7764	-68.4098
89.4	-71.6641	-70.2193	-66.9326	-64.3397	-64.138	-65.7724	-68.427
89.45	-71.7168	-70.2957	-67.0576	-64.2903	-64.2207	-65.7152	-68.4754
89.5	-71.7944	-70.4492	-67.2208	-64.1993	-64.2055	-65.5971	-68.52
89.55	-71.8325	-70.6295	-67.3683	-64.1411	-64.1132	-65.4369	-68.5198
89.6	-71.7995	-70.735	-67.4563	-64.2328	-64.003	-65.3037	-68.4738
89.65	-71.676	-70.701	-67.5206	-64.4539	-63.9045	-65.2664	-68.3906
89.7	-71.513	-70.574	-67.6198	-64.678	-63.8437	-65.2971	-68.2539
89.75	-71.4239	-70.4912	-67.7396	-64.8281	-63.8411	-65.3137	-68.0267
89.8	-71.4399	-70.5605	-67.8027	-64.9205	-63.8625	-65.2755	-67.7363
89.85	-71.5328	-70.7748	-67.805	-64.9474	-63.8679	-65.2116	-67.4821
89.9	-71.6991	-71.019	-67.8045	-64.8719	-63.8867	-65.1364	-67.3353
89.95	-71.8844	-71.1908	-67.8037	-64.7481	-63.9925	-65.0469	-67.2857
90	-71.9986	-71.2727	-67.7543	-64.7112	-64.1429	-64.9672	-67.2944
90.05	-72.0318	-71.3011	-67.6878	-64.8231	-64.1663	-64.9374	-67.3497
90.1	-72.0111	-71.3305	-67.6782	-64.9761	-64.0099	-64.9596	-67.3921
90.15	-71.9427	-71.3702	-67.731	-65.0378	-63.8234	-64.9942	-67.3519
90.2	-71.899	-71.391	-67.7826	-64.9909	-63.7257	-65.0223	-67.2423
90.25	-71.9508	-71.3658	-67.8092	-64.8902	-63.6842	-65.0631	-67.152
90.3	-72.032	-71.309	-67.8207	-64.7877	-63.6346	-65.1414	-67.1141
90.35	-72.0739	-71.2844	-67.8074	-64.7614	-63.5772	-65.2185	-67.103
90.4	-72.1233	-71.334	-67.7453	-64.9105	-63.5437	-65.2384	-67.1116
90.45	-72.1862	-71.4217	-67.6698	-65.1771	-63.533	-65.1861	-67.14
90.5	-72.1976	-71.4598	-67.6559	-65.3542	-63.5469	-65.08	-67.1618
90.55	-72.1858	-71.4324	-67.7334	-65.3108	-63.6217	-64.9148	-67.1293
90.6	-72.206	-71.4385	-67.8584	-65.1319	-63.7366	-64.6991	-67.0223
90.65	-72.1842	-71.5171	-67.9927	-64.9966	-63.8213	-64.5069	-66.846
90.7	-72.0825	-71.5756	-68.1414	-64.9981	-63.8614	-64.4128	-66.6281
90.75	-72.0172	-71.5232	-68.3122	-65.1155	-63.8766	-64.4094	-66.4397
90.8	-72.0279	-71.3965	-68.4831	-65.2572	-63.8741	-64.4085	-66.3667
90.85	-72.0025	-71.3075	-68.6258	-65.3521	-63.8678	-64.3626	-66.4305
90.9	-71.9095	-71.3068	-68.7414	-65.4203	-63.8607	-64.2722	-66.5449
90.95	-71.855	-71.3764	-68.851	-65.5275	-63.8578	-64.1463	-66.6122
91	-71.902	-71.4931	-68.9867	-65.7087	-63.8892	-63.9953	-66.5895
91.05	-72.0061	-71.6321	-69.1386	-65.8958	-63.9478	-63.8664	-66.4742
91.1	-72.0868	-71.7632	-69.2564	-65.9925	-63.9975	-63.8018	-66.3127
91.15	-72.09	-71.8493	-69.3033	-66.0015	-64.0367	-63.7941	-66.1885
91.2	-72.051	-71.8789	-69.3212	-66.0013	-64.0603	-63.8327	-66.1637
91.25	-72.0479	-71.8684	-69.363	-66.0496	-64.0727	-63.9182	-66.1864
91.3	-72.0809	-71.8387	-69.4275	-66.1373	-64.0893	-64.0393	-66.1606
91.35	-72.1281	-71.8174	-69.4777	-66.2248	-64.0857	-64.1351	-66.0636
91.4	-72.1749	-71.8153	-69.5121	-66.3007	-64.0343	-64.1465	-65.9483
91.45	-72.1982	-71.8514	-69.5481	-66.3912	-63.9872	-64.0556	-65.8774
91.5	-72.1685	-71.9667	-69.604	-66.5084	-63.9987	-63.8903	-65.8679
91.55	-72.1105	-72.1383	-69.7009	-66.5865	-64.0309	-63.6861	-65.89
91.6	-72.0711	-72.2666	-69.8528	-66.5633	-64.0022	-63.5159	-65.874
91.65	-72.0563	-72.2963	-70.0432	-66.4956	-63.9163	-63.4438	-65.7686
91.7	-72.0162	-72.2678	-70.2095	-66.4906	-63.8432	-63.4643	-65.6478
91.75	-71.938	-72.2627	-70.3142	-66.5912	-63.8377	-63.5268	-65.6368
91.8	-71.8621	-72.3075	-70.3661	-66.7402	-63.8821	-63.6176	-65.76
91.85	-71.8008	-72.3767	-70.3712	-66.8664	-63.9374	-63.7357	-65.898
91.9	-71.7173	-72.4474	-70.2877	-66.9479	-63.9763	-63.822	-65.9371
91.95	-71.618	-72.4889	-70.1209	-66.9776	-64.0141	-63.8197	-65.9071
92	-71.5771	-72.4895	-69.9937	-66.9621	-64.0811	-63.734	-65.8802
92.05	-71.5915	-72.4794	-70.028	-66.9519	-64.2024	-63.6339	-65.8392
92.1	-71.5534	-72.4697	-70.2136	-67.0102	-64.3602	-63.5921	-65.7074
92.15	-71.3909	-72.4632	-70.4237	-67.1383	-64.5	-63.6187	-65.504
92.2	-71.1959	-72.4621	-70.5681	-67.26	-64.5868	-63.6636	-65.3663
92.25	-71.0853	-72.4432	-70.6489	-67.337	-64.6184	-63.681	-65.3754
92.3	-71.0836	-72.3947	-70.6921	-67.4223	-64.621	-63.683	-65.4865
92.35	-71.1416	-72.3354	-70.6912	-67.5392	-64.6128	-63.7006	-65.6055
92.4	-71.2026	-72.2935	-70.6641	-67.6494	-64.6219	-63.7291	-65.6618
92.45	-71.233	-72.3059	-70.6826	-67.7343	-64.6668	-63.7473	-65.6337
92.5	-71.2418	-72.3942	-70.7665	-67.8257	-64.7526	-63.7281	-65.5275
92.55	-71.2831	-72.5432	-70.8611	-67.9505	-64.8437	-63.6671	-65.3911
92.6	-71.3744	-72.6984	-70.925	-68.0806	-64.8902	-63.6113	-65.3031
92.65	-71.475	-72.7796	-70.9896	-68.1705	-64.9054	-63.5897	-65.2921
92.7	-71.5219	-72.7761	-71.0804	-68.2209	-64.9613	-63.5843	-65.2987
92.75	-71.5089	-72.7657	-71.1568	-68.2584	-65.0587	-63.5859	-65.2257
92.8	-71.4649	-72.7635	-71.2095	-68.3081	-65.0841	-63.5733	-65.0752
92.85	-71.4452	-72.7132	-71.2853	-68.3752	-64.98	-63.5173	-64.9519
92.9	-71.4827	-72.6368	-71.3942	-68.4276	-64.8223	-63.4507	-64.9024
92.95	-71.5697	-72.6031	-71.459	-68.4525	-64.7058	-63.4372	-64.882
93	-71.6429	-72.6354	-71.4389	-68.4557	-64.6265	-63.5041	-64.8459
93.05	-71.6487	-72.7037	-71.4164	-68.4289	-64.5625	-63.6379	-64.7599
93.1	-71.5781	-72.735	-71.4594	-68.4152	-64.5441	-63.786	-64.6051
93.15	-71.4559	-72.6689	-71.5361	-68.5019	-64.6036	-63.8947	-64.4149
93.2	-71.2976	-72.5165	-71.5932	-68.6667	-64.6865	-63.9508	-64.2844
93.25	-71.1392	-72.3436	-71.6392	-68.7915	-64.7344	-63.9519	-64.2674
93.3	-71.0276	-72.2483	-71.7024	-68.829	-64.7504	-63.9083	-64.3012
93.35	-70.9672	-72.3095	-71.7844	-68.8567	-64.7782	-63.8689	-64.3225
93.4	-70.897	-72.462	-71.9019	-68.9387	-64.8397	-63.8808	-64.3535
93.45	-70.7737	-72.54	-72.0472	-69.0043	-64.9594	-63.9483	-64.4084
93.5	-70.6263	-72.5002	-72.1454	-68.9932	-65.1558	-64.0201	-64.432
93.55	-70.5094	-72.4282	-72.1439	-68.965	-65.4057	-64.0328	-64.3516
93.6	-70.4374	-72.355	-72.0814	-68.9837	-65.6222	-63.9937	-64.1635
93.65	-70.3961	-72.2775	-72.024	-69.0399	-65.7304	-63.9415	-63.9596
93.7	-70.4074	-72.2481	-71.9607	-69.1228	-65.7424	-63.9108	-63.8343
93.75	-70.4843	-72.2938	-71.8664	-69.2334	-65.7396	-63.932	-63.8345
93.8	-70.5914	-72.3732	-71.8205	-69.3162	-65.8	-64.0009	-63.9431
93.85	-70.6536	-72.4311	-71.9016	-69.3086	-65.9403	-64.0624	-64.065
93.9	-70.6369	-72.4178	-72.0522	-69.2522	-66.1365	-64.0388	-64.1055
93.95	-70.5374	-72.3299	-72.131	-69.216	-66.3396	-63.951	-64.0505
94	-70.3531	-72.2353	-72.1047	-69.1974	-66.5031	-63.9224	-63.9289
94.05	-70.0898	-72.1907	-72.0757	-69.1614	-66.5862	-64.019	-63.7935
94.1	-69.8108	-72.1981	-72.1132	-69.1658	-66.5967	-64.1639	-63.7011
94.15	-69.6154	-72.2467	-72.1894	-69.2801	-66.58	-64.2462	-63.6489
94.2	-69.547	-72.3132	-72.2581	-69.4656	-66.5945	-64.2536	-63.6144
94.25	-69.5642	-72.3131	-72.3132	-69.6062	-66.6646	-64.2241	-63.6126
94.3	-69.5776	-72.1903	-72.3874	-69.6599	-66.7574	-64.2012	-63.6193
94.35	-69.5545	-71.9818	-72.4802	-69.6864	-66.8224	-64.2178	-63.5771
94.4	-69.5102	-71.784	-72.5383	-69.7285	-66.8567	-64.2821	-63.4886
94.45	-69.4772	-71.6952	-72.5226	-69.7833	-66.9047	-64.3403	-63.4393
94.5	-69.4597	-71.7468	-72.4407	-69.8502	-66.9766	-64.3394	-63.5243
94.55	-69.4307	-71.8983	-72.3626	-69.9607	-67.0564	-64.3173	-63.7069
94.6	-69.3462	-72.0874	-72.3577	-70.1288	-67.1435	-64.3537	-63.8504
94.65	-69.2149	-72.2892	-72.416	-70.3436	-67.2619	-64.4631	-63.8591
94.7	-69.1118	-72.4818	-72.4905	-70.5694	-67.3849	-64.5661	-63.7835
94.75	-69.0911	-72.6023	-72.5292	-70.7395	-67.4539	-64.6172	-63.735
94.8	-69.139	-72.5941	-72.5161	-70.8064	-67.4584	-64.6361	-63.7623
94.85	-69.1786	-72.5019	-72.503	-70.7687	-67.4624	-64.6596	-63.8165
94.9	-69.1553	-72.4275	-72.5639	-70.6838	-67.5203	-64.6911	-63.8524
94.95	-69.0498	-72.4088	-72.7359	-70.6413	-67.6262	-64.7362	-63.8561
95	-68.8719	-72.4216	-72.9673	-70.7268	-67.7654	-64.8137	-63.8529
95.05	-68.6368	-72.4625	-73.157	-70.9316	-67.936	-64.8928	-63.879
95.1	-68.3969	-72.5294	-73.2315	-71.1496	-68.1263	-64.9035	-63.957
95.15	-68.2428	-72.5407	-73.2	-71.2761	-68.2758	-64.8184	-64.0698
95.2	-68.2209	-72.4062	-73.1128	-71.2999	-68.3315	-64.6955	-64.1476
95.25	-68.3002	-72.136	-73.0032	-71.2967	-68.2748	-64.5931	-64.1278
95.3	-68.3898	-71.8484	-72.8938	-71.3194	-68.1268	-64.5597	-64.0184
95.35	-68.3979	-71.6508	-72.8037	-71.3425	-67.9702	-64.6188	-63.8924
95.4	-68.2853	-71.5925	-72.7401	-71.3165	-67.9455	-64.7407	-63.7816
95.45	-68.1186	-71.6429	-72.69	-71.256	-68.1357	-64.8617	-63.6939
95.5	-68.0395	-71.7264	-72.6758	-71.207	-68.4297	-64.9816	-63.6682
95.55	-68.0971	-71.7722	-72.7444	-71.1959	-68.6432	-65.1325	-63.7468
95.6	-68.2091	-71.7763	-72.9079	-71.2203	-68.7129	-65.287	-63.8812
95.65	-68.2743	-71.7764	-73.0928	-71.2882	-68.708	-65.3919	-63.9525
95.7	-68.2617	-71.7814	-73.1667	-71.4024	-68.6808	-65.438	-63.9067
95.75	-68.1693	-71.7579	-73.0715	-71.5398	-68.6394	-65.4463	-63.7829
95.8	-68.0125	-71.6934	-72.8716	-71.6687	-68.6318	-65.4144	-63.659
95.85	-67.8708	-71.6333	-72.6687	-71.797	-68.6923	-65.3808	-63.5658
95.9	-67.8278	-71.6281	-72.5248	-71.9237	-68.776	-65.4182	-63.5093
95.95	-67.8728	-71.6688	-72.4547	-71.9918	-68.8128	-65.5477	-63.5051
96	-67.8992	-71.7066	-72.4545	-71.9662	-68.8242	-65.6873	-63.5525
96.05	-67.8359	-71.7032	-72.4669	-71.91	-68.8956	-65.7539	-63.6156
96.1	-67.7174	-71.6545	-72.4345	-71.9135	-69.0305	-65.7521	-63.6556
96.15	-67.6228	-71.5519	-72.38	-71.9733	-69.1505	-65.775	-63.6578
96.2	-67.6016	-71.4037	-72.3614	-72.0444	-69.1833	-65.8827	-63.5946
96.25	-67.6222	-71.2606	-72.3781	-72.123	-69.1364	-66.0497	-63.4557
96.3	-67.607	-71.1922	-72.3575	-72.2295	-69.0635	-66.2131	-63.3038
96.35	-67.5229	-71.1796	-72.282	-72.3221	-69.0139	-66.339	-63.2479
96.4	-67.4102	-71.1254	-72.2199	-72.3492	-69.049	-66.4223	-63.3096
96.45	-67.3644	-70.971	-72.1847	-72.3083	-69.1992	-66.4676	-63.3905
96.5	-67.4192	-70.7703	-72.1367	-72.2488	-69.4068	-66.4939	-63.4002
96.55	-67.4804	-70.5821	-72.0772	-72.1837	-69.5476	-66.5002	-63.3766
96.6	-67.4396	-70.4065	-72.0862	-72.0883	-69.5682	-66.4524	-63.4123
96.65	-67.3132	-70.244	-72.194	-71.9581	-69.5538	-66.3349	-63.5458
96.7	-67.2071	-70.132	-72.3291	-71.8567	-69.6004	-66.229	-63.7498
96.75	-67.1255	-70.0943	-72.4163	-71.822	-69.7106	-66.2234	-63.9535
96.8	-66.9726	-70.1112	-72.4526	-71.8122	-69.8229	-66.2943	-64.0587
96.85	-66.731	-70.1688	-72.4657	-71.7819	-69.9009	-66.3504	-64.0108
96.9	-66.5113	-70.234	-72.4472	-71.7567	-69.9797	-66.381	-63.8819
96.95	-66.3965	-70.2508	-72.3745	-71.798	-70.0961	-66.4288	-63.8318
97	-66.3212	-70.1728	-72.2543	-71.928	-70.2278	-66.4859	-63.9518
97.05	-66.2022	-70.0229	-72.1295	-72.1102	-70.2967	-66.5048	-64.1802
97.1	-66.0833	-69.8814	-72.0263	-72.2506	-70.2777	-66.5148	-64.3993
97.15	-66.0239	-69.7919	-71.9516	-72.2885	-70.266	-66.5743	-64.5304
97.2	-65.9968	-69.7278	-71.8886	-72.255	-70.3268	-66.6604	-64.5742
97.25	-65.9381	-69.6444	-71.8345	-72.2489	-70.4047	-66.7028	-64.5763
97.3	-65.8495	-69.5557	-71.8041	-72.3023	-70.4465	-66.7175	-64.5918
97.35	-65.777	-69.4844	-71.8221	-72.3443	-70.5115	-66.7772	-64.6245
97.4	-65.7123	-69.4228	-71.8685	-72.2915	-70.667	-66.9093	-64.6677
97.45	-65.6386	-69.355	-71.9109	-72.1715	-70.8336	-67.0781	-64.7218
97.5	-65.5915	-69.274	-71.9569	-72.1007	-70.8986	-67.2416	-64.765
97.55	-65.5826	-69.1975	-72.0354	-72.1585	-70.9099	-67.3723	-64.732
97.6	-65.5686	-69.1593	-72.1064	-72.3305	-71.0003	-67.4593	-64.621
97.65	-65.5144	-69.1818	-72.0981	-72.5284	-71.2044	-67.5176	-64.55
97.7	-65.448	-69.2064	-72.0002	-72.6617	-71.4074	-67.5943	-64.6346
97.75	-65.3978	-69.1546	-71.8787	-72.6887	-71.5053	-67.7181	-64.8474
97.8	-65.3315	-69.0477	-71.7888	-72.6563	-71.5175	-67.847	-65.0569
97.85	-65.2562	-68.9769	-71.7418	-72.6232	-71.4846	-67.9231	-65.1978
97.9	-65.2351	-68.9831	-71.7111	-72.5926	-71.4162	-67.9527	-65.2883
97.95	-65.2621	-69.0202	-71.6848	-72.5504	-71.3595	-68.0058	-65.3571
98	-65.2671	-69.0491	-71.6803	-72.5229	-71.3788	-68.1236	-65.4034
98.05	-65.2302	-69.035	-71.7118	-72.5377	-71.4779	-68.3021	-65.4463
98.1	-65.2053	-68.9471	-71.7601	-72.5763	-71.5829	-68.4857	-65.5023
98.15	-65.231	-68.7907	-71.8091	-72.6146	-71.6455	-68.6028	-65.5458
98.2	-65.2579	-68.6221	-71.8448	-72.6224	-71.6906	-68.6241	-65.5264
98.25	-65.2236	-68.497	-71.8625	-72.5631	-71.7092	-68.616	-65.4557
98.3	-65.1287	-68.4107	-71.8757	-72.44	-71.6662	-68.6337	-65.4229
98.35	-65.0187	-68.349	-71.9056	-72.3302	-71.6021	-68.6691	-65.4637
98.4	-64.9585	-68.3131	-71.937	-72.3276	-71.6006	-68.7147	-65.5361
98.45	-64.9755	-68.2942	-71.9276	-72.4469	-71.6884	-68.8054	-65.6178
98.5	-64.9969	-68.2691	-71.8565	-72.6183	-71.794	-68.9575	-65.7515
98.55	-64.9658	-68.2166	-71.7262	-72.7312	-71.821	-69.1451	-65.9102
98.6	-64.9179	-68.1641	-71.5481	-72.7365	-71.7801	-69.3424	-65.9901
98.65	-64.8717	-68.1302	-71.3472	-72.6861	-71.7475	-69.5185	-65.95
98.7	-64.8137	-68.0693	-71.1859	-72.6684	-71.7517	-69.6481	-65.8665
98.75	-64.7527	-67.9332	-71.1185	-72.7157	-71.7939	-69.704	-65.816
98.8	-64.7149	-67.7702	-71.1341	-72.7724	-71.867	-69.6849	-65.8192
98.85	-64.7339	-67.6949	-71.1622	-72.7759	-71.9222	-69.6188	-65.9012
98.9	-64.8171	-67.7105	-71.1608	-72.6797	-71.9237	-69.5702	-66.0593
98.95	-64.9199	-67.7062	-71.1132	-72.4634	-71.9115	-69.573	-66.2284
99	-64.9985	-67.6262	-70.9989	-72.1777	-71.9483	-69.6273	-66.3202
99.05	-65.0282	-67.5254	-70.795	-71.9393	-72.0352	-69.7588	-66.3351
99.1	-64.991	-67.4514	-70.5526	-71.841	-72.0973	-69.9697	-66.3349
99.15	-64.9283	-67.3443	-70.3705	-71.8472	-72.1072	-70.1672	-66.3746
99.2	-64.908	-67.168	-70.2893	-71.8596	-72.1397	-70.2187	-66.4924
99.25	-64.9095	-67.023	-70.2457	-71.8501	-72.2353	-70.1278	-66.6933
99.3	-64.859	-67.0071	-70.1881	-71.8702	-72.3205	-70.027	-66.9142
99.35	-64.7278	-67.0718	-70.1435	-71.983	-72.3366	-70.0086	-67.0305
99.4	-64.5508	-67.0869	-70.1443	-72.169	-72.307	-70.0513	-66.9719
99.45	-64.4216	-67.0102	-70.1644	-72.3293	-72.283	-70.1269	-66.7911
99.5	-64.4248	-66.8829	-70.1443	-72.3541	-72.2861	-70.2647	-66.6159
99.55	-64.5256	-66.732	-70.0663	-72.2242	-72.2687	-70.4277	-66.5672
99.6	-64.634	-66.591	-69.9724	-72.0581	-72.1968	-70.5099	-66.6812
99.65	-64.6771	-66.4961	-69.9319	-71.964	-72.145	-70.4636	-66.8965
99.7	-64.6157	-66.4419	-69.9619	-71.9232	-72.2166	-70.3637	-67.0852
99.75	-64.441	-66.3962	-70.0117	-71.8726	-72.4081	-70.2806	-67.1643
99.8	-64.2171	-66.3389	-69.9975	-71.8183	-72.592	-70.2218	-67.1774
99.85	-64.0558	-66.2672	-69.8975	-71.8133	-72.6691	-70.1626	-67.2256
[truncated: 49,614 more rows]

## Sheet: Fig. 1 Sd
	overlapping															Figure 3- figure supplement 2
	690nm
0.6 nA	zero deg	45deg	90 deg	135 deg	180deg	225dg	270deg	0.6 nA								Mechanical sensitivity of chinchilla SGNs.
	0.998999	0.99	0.996	0.0330006	0.0641994	0.467099	0.0999015	0.0494985
	0.0341994	0.996599	0.996599	0.0215994	0.0663	0.488701	0.0975015	0.0815994
	0.995701	0.0002997	0.0033006	0.0357006	0.0414	0.468901	0.0036	0.0582006
	0.0234006	0.999299	0.9978	0.0213	0.0501003	0.4845	0.0176997	0.0588
	0.0044994	0.9954	0.0015	0.0218994	0.0477003	0.0876	0.0152997	0.0534006
	0.0066	0.994499	0.9975	0.0165	0.0383997	0.0579	0.0234006	0.0705015
	0.0237006	0.0012006	0.0027003	0.0186006	0.0480003	0.118799	0.0210006	0.0800985
	0.0122994	0.0003003	0.0032997	0.0131997	0.0410997	0.0641994	0.0276003	0.0701985
	0.0069	0.9993	0.0054003	0.0197994	0.0507003	0.0290994	0.0192	0.0843
	0.0045	0.0015006	0.0059997	0.0233997	0.0827994	0.0251997	0.0332997	0.0653985
	0.0125994	0.9945	0.0035997	0.027	0.0519006	0.0242994	0.0233997	0.0645
	0.0086997	0.0026994	0.0086997	0.0275994	0.0420006	0.0189	0.0224994	0.0680985
	0.0108003	0.9957	0.0062997	0.0207003	0.0455994	0.0254997	0.0260997	0.0731985
	0.0278994	0.999301	0.0083985	0.0273	0.0972006	0.0291	0.0282003	0.0543006
	0.0165015	0.996901	0.0059985	0.0219006	0.0557994	0.0281997	0.0243006	0.0714015
	0.0171006	0.999002	0.0066015	0.0240015	0.0669015	0.0303003	0.0308985	0.0585
	0.0147006	0.0018015	0.0072006	0.0201	0.048	0.0308997	0.0179994	0.0711
	0.0153	0.996298	0.0048006	0.0222006	0.0560994	0.0299994	0.0216015	0.0566994
	0.0083994	0.0059994	0.0099006	0.0243015	0.0672015	0.0350994	0.0356994	0.0588
	0.0150006	0.0035994	0.0105	0.0233994	0.0573015	0.0297	0.0332994	0.0593994
	0.0156	0.0072015	0.0126006	0.0225006	0.0579006	0.0287997	0.0383994	0.0449985
	0.0116985	0.0153006	0.0116985	0.0290985	0.051	0.0294006	0.0375006	0.0591
	0.0092985	0.0084	0.0153006	0.0297015	0.0531006	0.0315015	0.0381	0.0537006
	0.0204006	0.006	0.0143985	0.0303006	0.0732006	0.0305994	0.0357	0.0572994
	0.0330006	0.0081006	0.0150015	0.0309	0.0438	0.0431994	0.0348015	0.0564006
	0.0126015	0.0087	0.0126015	0.0239994	0.0392994	0.0393015	0.0338994	0.0554985
	0.0116994	0.0063	0.0132006	0.0320985	0.0518994	0.0383994	0.0405006	0.0561015
	0.0138	0.0006006	0.262198	0.0282006	0.0404997	0.0420015	0.0440994	0.0656985
	0.993001	0.9936	0.0138	0.0333006	0.0801003	0.0396015	0.0432006	0.0543006
	0.0026997	0.995701	0.0003	0.0389994	0.0612006	0.0461994	0.0408006	0.0564015
	0.0077997	0.0009006	0.996	0.0290994	0.0557997	0.0392985		0.0644985
	0.9948	0.9999	0.998101	0.0222003	0.0548994	0.0384		0.0606006
	0.0029997	0.996001	0.0048003	0.0227997	0.0390006	0.0405006		0.0552015
	0.0036006	0.9891	0.0009006	0.0278997	0.0500994	0.0440994		0.0528015
	0.9951	0.9957	0.996899	0.0210006	0.0522	0.0462		0.0593994
	0.998701	0.996301	0.9975	0.0141	0.0483003	0.0483006		0.0599985
	0.996301	0.9984	0.999599	0.0192	0.0653994			0.0561006
	0.0074994	0.997499	0.0018	0.0182997	0.0509985			0.0567
	0.0035997	0.995099	0.0023994	0.0219	0.0605994			0.0543
	0.0011997	0.9987	0.0015006	0.0224994	0.0492015			0.0639006
	0.9972	0.999301	0.0050994	0.0260997	0.0468015			0.0615006
	0.0024	0.0015015	0.0101994	0.0222	0.0533994			0.0530985
	0.0015015	0.0035985	0.0048	0.0212997	0.0584994			0.0551994
	0.999002	0.0011985	0.0083985	0.0219006	0.0531			0.0602994
	0.0056994	0.0003	0.0075	0.0225	0.0507			0.0699
	0.0078	0.0008994	0.0080994	0.0185985	0.0467985
	0.0054	0.0059994	0.0027	0.0297006	0.0534
	0.0150006	0.0081	0.0093015	0.0257994	0.0569985
	0.998998	0.0027006	0.0083994	0.0249006	0.0501015
	0.0027006	0.0048015	0.0105	0.0270015	0.0582006
	0.0048015	0.0084	0.0096015	0.0260994	0.0528015
	0.0084	0.0075015	0.0102006	0.0252006	0.0215994
	0.0014994	0.0065994	0.0137994	0.0287994	0.0176997
	0.0140994	0.0057006	0.0143985	0.0338994	0.0167994
	0.0146985	0.0033006	0.0150015	0.0285	0.0293994
	0.0063	0.0555006	0.0111	0.0290994	0.0269994
	0.0050997	0.0636	0.0132006	0.0266994	0.0216
	0.0087	0.0582006	0.224698	0.0347985	0.0252003
	0.0198003	0.0558006	0.0138	0.0156006	0.0243
	0.0039	0.0624003	0.162	0.0132006	0.0233997
	0.0075003	0.0644994	0.996	0.0183006	0.0209997
	0.0020994	0.0395994	0.188101	0.0189	0.0275994
	0.999599	0.0431997	0.0041994	0.0179997	0.0297
	0.0018	0.0528003	0.9987	0.0170994	0.0183003
	0.0023994	0.0414006	0.0039	0.0221994	0.0264015
	0.0090006	0.0330003	0.0015	0.0153003	0.0270006
	0.0035997	0.0366006	0.0005997	0.0219	0.0291015
	0.0026994	0.0642006	0.0071994	0.0315006	0.0327
	0.9987	0.0348	0.0093	0.0231003	0.0287985
	0.0174	0.0339015	0.0039006	0.0176994	0.0308994
	0.996901	0.0509985	0.0074994	0.0302994	0.0314985
	0.0066015	0.0426	0.0125994	0.0219006	0.0276006
	0.0102	0.0536985	0.2031	0.0225	0.0327006
	0.0123006	0.0498006	0.0057003	0.0246006	0.0392985
	0.0054	0.0638985	0.191701	0.0281994	0.0459
	0.0045015	0.0434994	0.0093006	0.0362985	0.0389994
	0.0110994	0.0576006	0.0144006	0.0324006	0.0336
	0.0072015	0.0477006	0.0090015	0.0284994	0.0416994
	0.0078006	0.0423015	0.197999	0.0381	0.0363
	0.0204006	0.0518985	0.0080994	0.0402006
	0.0105006	0.0600015	0.195599	0.0273015
	0.0095985	0.0606006	0.0102	0.0309
	0.0162	0.0612	0.0062985	0.036
	0.0078015	0.0497985	0.0144015	0.0351015
			0.0120015	0.0395985
			0.0140985	0.0357006
			0.0116985	0.0333006
			0.2007
			0.0153006
			0.0159
			0.021
			0.0140994
			0.0116994
			0.0153015
