# Supplementary material for: Intrinsic mechanical sensitivity of mammalian auditory neurons as a contributor to sound-driven neural activity
Source: eLife. 2022 Mar 10;11:e74948. doi: 10.7554/eLife.74948 (PMC8942473; doi:10.7554/eLife.74948)
Supplement: Figure 4—source data 1. [file elife-74948-fig4-data1.xlsx]

## Sheet: Fig.4A
Fi
The threshold curves (TC) are plotted as waterfall curves. The level of the TC is expressed in um. The convertion factor is 1 dB SPL / 3 um. The depth of 80 dB SPL is given in the column before the frequency.
depth (um) of 80 dB indicator	freq (Hz)	TC (um)
887.947	100	838.5		887.993	100	880.5		856.986	100	804.5		768.995	100	662.5		753.97	100	656.5		738.991	100	758.5		713.913	100	636		689.904	100	589.5		658.977	100	582.5		648.941	100	557.5		637.986	100	576.5		629	100	648.5		604.982	100
887.947	107.188	808.5			107.188	865.5			107.188	798.5			107.188	659.5			107.188	656.5			107.188	653.5			107.188	630			107.188	583.5			107.188	573.5			114.574	542.5			114.574	552.5			114.574	627.5			114.574
	114.892	810			114.892	865.5			114.892	801.5			114.892	647.5			114.892	656.5			114.892	647.5			114.892	616.5			114.892	577.5			114.892	558.5			131.271	551.5			131.271	558.5			131.271	588.5			131.271
	123.15	811.5			123.15	859.5			123.15	771.5			123.15	655			123.15	662.5			123.15	656.5			123.15	607.5			123.15	574.5			123.15	558.5			150.402	551.5			150.402	564.5			150.402	591.5			150.402
	132.002	804			132.002	844.5			132.002	774.5			132.002	656.5			132.002	671.5			132.002	665.5			132.002	613.5			132.002	577.5			132.002	558.5			172.321	554.5			172.321	561.5			172.321	558.5			172.321
	141.49	811.5			141.49	838.5			141.49	780.5			141.49	659.5			141.49	665.5			141.49	653.5			141.49	613.5			141.49	583.5			141.49	561.5			197.435	527.5			197.435	552.5			197.435	546.5			197.435
	151.66	804			151.66	844.5			151.66	771.5			151.66	661			151.66	662.5			151.66	638.5			151.66	610.5			151.66	574.5			151.66	567.5			226.209	527.5			226.209	516.5			226.209	549.5			226.209
	162.561	802.5			162.561	826.5			162.561	771.5			162.561	668.5			162.561	658			162.561	635.5			162.561	613.5			162.561	561			162.561	564.5			259.176	518.5			259.176	528.5			259.176	537.5			259.176
	174.246	805.5			174.246	808.5			174.246	761			174.246	671.5			174.246	653.5			174.246	626.5			174.246	618			174.246	549			174.246	558.5			296.947	521.5			296.947	515			296.947	543.5			296.947
	186.77	790.5			186.77	811.5			186.77	764			186.77	673			186.77	650.5			186.77	620.5			186.77	597			186.77	547.5			186.77	549.5			340.223	500.5			340.223	498.5			340.223	552.5			340.223
	200.195	790.5			200.195	811.5			200.195	753.5			200.195	668.5			200.195	656.5			200.195	605.5			200.195	601.5			200.195	559.5			200.195	555.5			389.806	499			389.806	483.5			389.806	566			389.806
	214.585	781.5			214.585	801			214.585	759.5			214.585	656.5			214.585	635.5			214.585	608.5			214.585	598.5			214.585	562.5			214.585	543.5			446.615	487			446.615	474.5			446.615	573.5			446.615
	230.009	775.5			230.009	796.5			230.009	741.5			230.009	656.5			230.009	632.5			230.009	599.5			230.009	580.5			230.009	555			230.009	531.5			511.703	490			511.703	438.5			511.703	579.5			511.703
	246.541	774			246.541	784.5			246.541	738.5			246.541	641.5			246.541	635.5			246.541	593.5			246.541	583.5			246.541	553.5			246.541	522.5			586.277	481			586.277	443			586.277	582.5			586.277
	264.262	754.5			264.262	790.5			264.262	729.5			264.262	647.5			264.262	613			264.262	586			264.262	574.5			264.262	541.5			264.262	525.5			671.719	455.5			671.719	444.5			671.719	593			671.719
	283.257	750			283.257	778.5			283.257	732.5			283.257	656.5			283.257	614.5			283.257	593.5			283.257	580.5			283.257	541.5			283.257	522.5			769.614	436			769.614	444.5			769.614	599			769.614
	303.616	748.5			303.616	757.5			303.616	729.5			303.616	629.5			303.616	614.5			303.616	584.5			303.616	571.5			303.616	538.5			303.616	501.5			881.775	455.5			881.775	462.5			881.775	609.5			881.775
	325.44	754.5			325.44	742.5			325.44	722			325.44	629.5			325.44	611.5			325.44	581.5			325.44	568.5			325.44	534			325.44	498.5			1010.28	494.5			1010.28	471.5			1010.28	630.5			1010.28
	348.832	759			348.832	745.5			348.832	708.5			348.832	626.5			348.832	602.5			348.832	578.5			348.832	571.5			348.832	532.5			348.832	507.5			1157.52	533.5			1157.52	582.5			1157.52	639.5			1157.52
	373.905	742.5			373.905	751.5			373.905	702.5			373.905	602.5			373.905	599.5			373.905	572.5			373.905	556.5			373.905	526.5			373.905	486.5			1326.21	653.5			1326.21	630.5			1326.21	651.5			1326.21
	400.781	748.5			400.781	736.5			400.781	693.5			400.781	602.5			400.781	598			400.781	566.5			400.781	541.5			400.781	526.5			400.781	471.5			1519.49	673			1519.49	666.5			1519.49	657.5			1519.49
	429.588	736.5			429.588	733.5			429.588	690.5			429.588	598			429.588	584.5			429.588	554.5			429.588	538.5			429.588	520.5			429.588	468.5			1740.93	679			1740.93	668			1740.93	659			1740.93
	460.466	739.5			460.466	742.5			460.466	690.5			460.466	598			460.466	587.5			460.466	542.5			460.466	544.5			460.466	505.5			460.466	467			1994.65	679			1994.65	668			1994.65	659			1994.65
	493.563	732			493.563	733.5			493.563	669.5			493.563	590.5			493.563	578.5			493.563	536.5			493.563	529.5			493.563	502.5			493.563	459.5			2285.34	679			2285.34	668			2285.34	659			2285.34
	529.039	724.5			529.039	724.5			529.039	669.5			529.039	575.5			529.039	563.5			529.039	542.5			529.039	525			529.039	502.5			529.039	459.5			2618.4	679			2618.4	668			2618.4	659			2618.4
	567.066	715.5			567.066	721.5			567.066	663.5			567.066	569.5			567.066	566.5			567.066	506.5			567.066	516			567.066	490.5			567.066	441.5			3000	679			3000	668			3000	659			3000
	607.825	721.5			607.825	703.5			607.825	642.5			607.825	568			607.825	554.5			607.825	509.5			607.825	517.5			607.825	489			607.825	429.5
	651.514	724.5			651.514	700.5			651.514	647			651.514	563.5			651.514	539.5			651.514	509.5			651.514	499.5			651.514	474			651.514	419
	698.344	721.5			698.344	712.5			698.344	654.5			698.344	569.5			698.344	541			698.344	523			698.344	490.5			698.344	471			698.344	423.5
	748.539	711			748.539	709.5			748.539	660.5			748.539	575.5			748.539	545.5			748.539	527.5			748.539	493.5			748.539	457.5			748.539	426.5
	802.343	714			802.343	715.5			802.343	669.5			802.343	584.5			802.343	550			802.343	545.5			802.343	490.5			802.343	454.5			802.343	419
	860.014	721.5			860.014	745.5			860.014	687.5			860.014	596.5			860.014	563.5			860.014	568			860.014	499.5			860.014	463.5			860.014	441.5
	921.83	732			921.83	757.5			921.83	741.5			921.83	623.5			921.83	584.5			921.83	572.5			921.83	520.5			921.83	469.5			921.83	456.5
	988.089	748.5			988.089	804			988.089	753.5			988.089	650.5			988.089	599.5			988.089	581.5			988.089	532.5			988.089	511.5			988.089	477.5
	1059.11	793.5			1059.11	880.5			1059.11	801.5			1059.11	698.5			1059.11	617.5			1059.11	626.5			1059.11	556.5			1059.11	523.5			1059.11	501.5
	1135.24	868.5			1135.24	898.5			1135.24	825.5			1135.24	752.5			1135.24	641.5			1135.24	695.5			1135.24	576			1135.24	532.5			1135.24	510.5
	1216.84	913.5			1216.84	918			1216.84	857			1216.84	764.5			1216.84	665.5			1216.84	710.5			1216.84	595.5			1216.84	568.5			1216.84	540.5
	1304.3	918			1304.3	918			1304.3	864.5			1304.3	769			1304.3	689.5			1304.3	740.5			1304.3	619.5			1304.3	577.5			1304.3	567.5
	1398.05	918			1398.05	918			1398.05	876.5			1398.05	779.5			1398.05	727			1398.05	758.5			1398.05	715.5			1398.05	598.5			1398.05	588.5
	1498.54	918			1498.54	918			1498.54	882.5			1498.54	788.5			1498.54	776.5			1498.54	769			1498.54	739.5			1498.54	700.5			1498.54	630.5
	1606.25	918			1606.25	918			1606.25	887			1606.25	799			1606.25	784			1606.25	769			1606.25	744			1606.25	709.5			1606.25	675.5
	1721.7	918			1721.7	918			1721.7	887			1721.7	799			1721.7	784			1721.7	769			1721.7	744			1721.7	715.5			1721.7	681.5
	1845.46	918			1845.46	918			1845.46	887			1845.46	799			1845.46	784			1845.46	769			1845.46	744			1845.46	714			1845.46	687.5
	1978.1	918			1978.1	918			1978.1	887			1978.1	799			1978.1	784			1978.1	769			1978.1	744			1978.1	720			1978.1	689
	2120.29	918			2120.29	918			2120.29	887			2120.29	799			2120.29	784			2120.29	769			2120.29	744			2120.29	720			2120.29	689
	2272.69	918			2272.69	918			2272.69	887			2272.69	799			2272.69	784			2272.69	769			2272.69	744			2272.69	720			2272.69	689
	2436.04	918			2436.04	918			2436.04	887			2436.04	799			2436.04	784			2436.04	769			2436.04	744			2436.04	720			2436.04	689
	2611.14	918			2611.14	918			2611.14	887			2611.14	799			2611.14	784			2611.14	769			2611.14	744			2611.14	720			2611.14	689
	2798.83	918			2798.83	918			2798.83	887			2798.83	799			2798.83	784			2798.83	769			2798.83	744			2798.83	720			2798.83	689
	3000	918			3000	918			3000	887			3000	782.5			3000	784			3000	769			3000	744			3000	720			3000	689
[truncated: 46 more columns]

## Sheet: Fig.4B
The threshold curves (TC) are plotted as waterfall curves. The level of the TC is expressed in um. The convertion factor is 1 dB SPL / 3 um. The depth of 80 dB SPL is given in the column before the frequency.
depth (um) of 80 dB SPL indicator	freq (Hz)	TC (um)
154.997	100	183.5		110.993	100	115.5		61.997	100	75.5		26.9996	100	-16.5		14.9998	100	-40.5		-98.0004	100	-117.5		-118	100	-140.5		-125.001	100	-141.5		-210.001	100	-249		593.971	100	586.5		486.997	100	436		379.975	100	300.5		335.956	100
	107.22	185			107.22	120			107.22	47			107.22	-34.5			107.22	-43.5			107.22	-120.5			107.22	-137.5			107.22	-150.5			107.207	-256.5			107.236	586.5			107.236	437.5			107.236	294.5			107.236
	114.962	156.5			114.962	112.5			114.962	50			114.962	-31.5			114.962	-40.5			114.962	-144.5			114.962	-155.5			114.962	-159.5			114.934	-256.5			114.995	576			114.995	440.5			114.995	285.5			114.995
	123.262	162.5			123.262	118.5			123.262	60.5			123.262	-36			123.262	-42			123.262	-138.5			123.262	-161.5			123.262	-173			123.217	-252			123.315	574.5			123.315	448			123.315	282.5			123.315
	132.162	165.5			132.162	121.5			132.162	63.5			132.162	-28.5			132.162	-40.5			132.162	-140			132.162	-155.5			132.162	-171.5			132.097	-250.5			132.238	571.5			132.238	424			132.238	288.5			132.238
	141.704	168.5			141.704	124.5			141.704	72.5			141.704	-25.5			141.704	-34.5			141.704	-126.5			141.704	-143.5			141.704	-165.5			141.618	-244.5			141.806	576			141.806	425.5			141.806	291.5			141.806
	151.936	165.5			151.936	133.5			151.936	74			151.936	-18			151.936	-39			151.936	-129.5			151.936	-136			151.936	-153.5			151.824	-241.5			152.066	577.5			152.066	415			152.066	300.5			152.066
	162.906	162.5			162.906	141			162.906	78.5			162.906	-21			162.906	-40.5			162.906	-120.5			162.906	-131.5			162.906	-141.5			162.766	-243			163.069	574.5			163.069	404.5			163.069	297.5			163.069
	174.668	168.5			174.668	141			174.668	69.5			174.668	-15			174.668	-34.5			174.668	-105.5			174.668	-128.5			174.668	-138.5			174.497	-240			174.868	576			174.868	410.5			174.868	291.5			174.868
	187.28	168.5			187.28	127.5			187.28	75.5			187.28	-19.5			187.28	-30			187.28	-102.5			187.28	-119.5			187.28	-138.5			187.073	-247.5			187.52	553.5			187.52	407.5			187.52	279.5			187.52
	200.802	150.5			200.802	127.5			200.802	74			200.802	-18			200.802	-46.5			200.802	-129.5			200.802	-121			200.802	-132.5			200.556	-253.5			201.089	535.5			201.089	412			201.089	276.5			201.089
	215.3	156.5			215.3	115.5			215.3	66.5			215.3	-22.5			215.3	-58.5			215.3	-123.5			215.3	-122.5			215.3	-138.5			215.01	-256.5			215.638	535.5			215.638	389.5			215.638	279.5			215.638
	230.845	165.5			230.845	124.5			230.845	71			230.845	-31.5			230.845	-55.5			230.845	-126.5			230.845	-152.5			230.845	-159.5			230.506	-279			231.241	531			231.241	389.5			231.241	273.5			231.241
	247.513	159.5			247.513	118.5			247.513	60.5			247.513	-40.5			247.513	-57			247.513	-132.5			247.513	-146.5			247.513	-165.5			247.119	-279			247.973	532.5			247.973	389.5			247.973	279.5			247.973
	265.384	143			265.384	112.5			265.384	53			265.384	-39			265.384	-55.5			265.384	-138.5			265.384	-143.5			265.384	-156.5			264.929	-274.5			265.915	517.5			265.915	389.5			265.915	264.5			265.915
	284.545	138.5			284.545	106.5			284.545	48.5			284.545	-54			284.545	-52.5			284.545	-132.5			284.545	-136			284.545	-156.5			284.022	-271.5			285.155	522			285.155	388			285.155	267.5			285.155
	305.09	141.5			305.09	105			305.09	39.5			305.09	-52.5			305.09	-46.5			305.09	-129.5			305.09	-133			305.09	-150.5			304.492	-267			305.788	517.5			305.788	389.5			305.788	251			305.788
	327.118	138.5			327.118	88.5			327.118	45.5			327.118	-42			327.118	-40.5			327.118	-126.5			327.118	-125.5			327.118	-155			326.437	-277.5			327.913	502.5			327.913	383.5			327.913	255.5			327.913
	350.736	143			350.736	97.5			350.736	47			350.736	-43.5			350.736	-58.5			350.736	-132.5			350.736	-119.5			350.736	-147.5			349.964	-274.5			351.639	504			351.639	380.5			351.639	240.5			351.639
	376.06	144.5			376.06	100.5			376.06	48.5			376.06	-31.5			376.06	-52.5			376.06	-131			376.06	-107.5			376.06	-150.5			375.186	-262.5			377.082	501			377.082	379			377.082	240.5			377.082
	403.213	147.5			403.213	103.5			403.213	39.5			403.213	-34.5			403.213	-39			403.213	-129.5			403.213	-98.5			403.213	-153.5			402.226	-264			404.366	495			404.366	379			404.366	246.5			404.366
	432.326	132.5			432.326	100.5			432.326	42.5			432.326	-25.5			432.326	-31.5			432.326	-131			432.326	-88			432.326	-147.5			431.214	-271.5			433.624	493.5			433.624	371.5			433.624	243.5			433.624
	463.54	131			463.54	106.5			463.54	45.5			463.54	-19.5			463.54	-42			463.54	-120.5			463.54	-88			463.54	-147.5			462.292	-270			465	498			465	365.5			465	242			465
	497.009	132.5			497.009	111			497.009	45.5			497.009	-15			497.009	-36			497.009	-120.5			497.009	-88			497.009	-144.5			495.61	-265.5			498.645	495			498.645	362.5			498.645	237.5			498.645
	532.894	135.5			532.894	118.5			532.894	48.5			532.894	-13.5			532.894	-25.5			532.894	-116			532.894	-89.5			532.894	-132.5			531.329	-259.5			534.724	490.5			534.724	362.5			534.724	243.5			534.724
	571.37	132.5			571.37	106.5			571.37	47			571.37	-22.5			571.37	-37.5			571.37	-117.5			571.37	-95.5			571.37	-135.5			569.623	-258			573.415	484.5			573.415	368.5			573.415	243.5			573.415
	612.625	132.5			612.625	94.5			612.625	54.5			612.625	-25.5			612.625	-19.5			612.625	-105.5			612.625	-101.5			612.625	-143			610.676	-253.5			614.904	474			614.904	359.5			614.904	251			614.904
	656.858	135.5			656.858	103.5			656.858	50			656.858	-10.5			656.858	-7.5			656.858	-105.5			656.858	-88			656.858	-138.5			654.688	-256.5			659.396	478.5			659.396	347.5			659.396	246.5			659.396
	704.284	134			704.284	105			704.284	23			704.284	-10.5			704.284	7.5			704.284	-99.5			704.284	-88			704.284	-141.5			701.872	-258			707.107	481.5			707.107	350.5			707.107	255.5			707.107
	755.135	135.5			755.135	103.5			755.135	15.5			755.135	-9			755.135	7.5			755.135	-87.5			755.135	-92.5			755.135	-132.5			752.456	-253.5			758.27	484.5			758.27	347.5			758.27	243.5			758.27
	809.657	132.5			809.657	109.5			809.657	24.5			809.657	1.5			809.657	10.5			809.657	-89			809.657	-88			809.657	-129.5			806.686	-250.5			813.135	520.5			813.135	350.5			813.135	243.5			813.135
	868.117	144.5			868.117	105			868.117	27.5			868.117	7.5			868.117	12			868.117	-89			868.117	-88			868.117	-137			864.825	-237			871.969	544.5			871.969	355			871.969	242			871.969
	930.796	153.5			930.796	106.5			930.796	36.5			930.796	7.5			930.796	16.5			930.796	-102.5			930.796	-88			930.796	-132.5			927.154	-240			935.061	571.5			935.061	359.5			935.061	240.5			935.061
	998.002	152			998.002	103.5			998.002	42.5			998.002	7.5			998.002	16.5			998.002	-87.5			998.002	-88			998.002	-123.5			993.974	-232.5			1002.72	612			1002.72	386.5			1002.72	243.5			1002.72
	1070.06	165.5			1070.06	108			1070.06	51.5			1070.06	-10.5			1070.06	22.5			1070.06	-83			1070.06	-88			1070.06	-111.5			1065.61	-229.5			1075.27	619.5			1075.27	401.5			1075.27	246.5			1075.27
	1147.32	174.5			1147.32	114			1147.32	60.5			1147.32	-4.5			1147.32	7.5			1147.32	-72.5			1147.32	-88			1147.32	-99.5			1142.41	-232.5			1153.07	624			1153.07	458.5			1153.07	267.5			1153.07
	1230.16	182			1230.16	118.5			1230.16	69.5			1230.16	-25.5			1230.16	13.5			1230.16	-68			1230.16	-92.5			1230.16	-95			1224.74	-232.5			1236.5	624			1236.5	512.5			1236.5	294.5			1236.5
	1318.98	185			1318.98	115.5			1318.98	63.5			1318.98	-19.5			1318.98	3			1318.98	-75.5			1318.98	-92.5			1318.98	-96.5			1313.01	-228			1325.97	624			1325.97	517			1325.97	339.5			1325.97
	1414.21	185			1414.21	126			1414.21	68			1414.21	-13.5			1414.21	7.5			1414.21	-78.5			1414.21	-91			1414.21	-117.5			1407.64	-234			1421.91	624			1421.91	517			1421.91	407			1421.91
	1516.32	185			1516.32	130.5			1516.32	68			1516.32	-24			1516.32	-3			1516.32	-72.5			1516.32	-88			1516.32	-120.5			1509.09	-231			1524.79	624			1524.79	517			1524.79	410			1524.79
	1625.8	185			1625.8	130.5			1625.8	77			1625.8	-15			1625.8	-13.5			1625.8	-84.5			1625.8	-98.5			1625.8	-108.5			1617.85	-223.5			1635.12	624			1635.12	517			1635.12	410			1635.12
	1743.19	185			1743.19	130.5			1743.19	84.5			1743.19	-4.5			1743.19	-6			1743.19	-83			1743.19	-100			1743.19	-114.5			1734.46	-247.5			1753.43	624			1753.43	517			1753.43	410			1753.43
	1869.05	185			1869.05	136.5			1869.05	92			1869.05	-19.5			1869.05	7.5			1869.05	-84.5			1869.05	-92.5			1869.05	-105.5			1859.46	-240			1880.3	624			1880.3	517			1880.3	410			1880.3
	2004	185			2004	141			2004	92			2004	-22.5			2004	13.5			2004	-81.5			2004	-88			2004	-99.5			1993.47	-238.5			2016.35	624			2016.35	517			2016.35	410			2016.35
	2148.7	185			2148.7	141			2148.7	92			2148.7	-16.5			2148.7	25.5			2148.7	-78.5			2148.7	-95.5			2148.7	-95			2137.14	-232.5			2162.25	624			2162.25	515.5			2162.25	410			2162.25
	2303.84	185			2303.84	141			2303.84	92			2303.84	-15			2303.84	19.5			2303.84	-113			2303.84	-95.5			2303.84	-95			2291.17	-228			2318.7	624			2318.7	517			2318.7	410			2318.7
	2470.18	185			2470.18	136.5			2470.18	92			2470.18	-19.5			2470.18	25.5			2470.18	-111.5			2470.18	-88			2470.18	-111.5			2456.3	-220.5			2486.47	624			2486.47	517			2486.47	410			2486.47
	2648.53	185			2648.53	141			2648.53	92			2648.53	-10.5			2648.53	31.5			2648.53	-105.5			2648.53	-92.5			2648.53	-105.5			2633.32	-223.5			2666.38	624			2666.38	517			2666.38	410			2666.38
	2839.76	185			2839.76	141			2839.76	92			2839.76	-10.5			2839.76	31.5			2839.76	-107			2839.76	-88			2839.76	-105.5			2823.11	-220.5			2859.3	624			2859.3	517			2859.3	410			2859.3
	3044.8	185			3044.8	141			3044.8	92			3044.8	-16.5			3044.8	-28.5			3044.8	-101			3044.8	-98.5			3044.8	-114.5			3026.57	-216			3066.19	624			3066.19	517			3066.19	410			3066.19
	3264.64	185			3264.64	141			3264.64	92			3264.64	-49.5			3264.64	-22.5			3264.64	-128			3264.64	-128.5			3264.64	-153.5			3244.7	-250.5			3288.04	624			3288.04	517			3288.04	410			3288.04
	3500.36	185			3500.36	141			3500.36	92			3500.36	-49.5			3500.36	-22.5			3500.36	-138.5			3500.36	-121			3500.36	-159.5			3478.55	-250.5			3525.95	624			3525.95	517			3525.95	410			3525.95
	3753.09	185			3753.09	141			3753.09	92			3753.09	-46.5			3753.09	-18			3753.09	-138.5			3753.09	-110.5			3753.09	-165.5			3729.25	-250.5			3781.07	624			3781.07	517			3781.07	410			3781.07
	4024.07	185			4024.07	141			4024.07	92			4024.07	-43.5			4024.07	-13.5			4024.07	-132.5			4024.07	-104.5			4024.07	-162.5			3998.02	-247.5			4054.65	624			4054.65	517			4054.65	410			4054.65
	4314.62	185			4314.62	141			4314.62	92			4314.62	-37.5			4314.62	-25.5			4314.62	-138.5			4314.62	-100			4314.62	-152			4286.16	-249			4348.03	624			4348.03	517			4348.03	410			4348.03
	4626.14	185			4626.14	141			4626.14	92			4626.14	-37.5			4626.14	-25.5			4626.14	-132.5			4626.14	-98.5			4626.14	-147.5			4595.07	-246			4662.63	624			4662.63	517			4662.63	410			4662.63
	4960.16	185			4960.16	141			4960.16	92			4960.16	-40.5			4960.16	-28.5			4960.16	-138.5			4960.16	-100			4960.16	-147.5			4926.24	-249			5000	624			5000	517			5000	410			5000
	5318.3	185			5318.3	141			5318.3	92			5318.3	-58.5			5318.3	-33			5318.3	-132.5			5318.3	-124			5318.3	-156.5			5281.28	-243
	5702.29	185			5702.29	139.5			5702.29	92			5702.29	-57			5702.29	-28.5			5702.29	-123.5			5702.29	-107.5			5702.29	-150.5			5661.9	-244.5
	6114.01	185			6114.01	141			6114.01	92			6114.01	-54			6114.01	-16.5			6114.01	-114.5			6114.01	-103			6114.01	-147.5			6069.96	-259.5
	6555.45	185			6555.45	141			6555.45	92			6555.45	-52.5			6555.45	-7.5			6555.45	-120.5			6555.45	-98.5			6555.45	-147.5			6507.43	-253.5
	7028.77	185			7028.77	141			7028.77	92			7028.77	-55.5			7028.77	1.5			7028.77	-138.5			7028.77	-134.5			7028.77	-168.5			6976.42	-252
	7536.26	185			7536.26	141			7536.26	92			7536.26	-55.5			7536.26	3			7536.26	-134			7536.26	-137.5			7536.26	-189.5			7479.22	-247.5
	8080.4	185			8080.4	139.5			8080.4	92			8080.4	-46.5			8080.4	-6			8080.4	-126.5			8080.4	-137.5			8080.4	-185			8018.25	-229.5
	8663.82	185			8663.82	141			8663.82	92			8663.82	-37.5			8663.82	-3			8663.82	-123.5			8663.82	-137.5			8663.82	-183.5			8596.14	-219
	9289.37	185			9289.37	139.5			9289.37	92			9289.37	-27			9289.37	-4.5			9289.37	-114.5			9289.37	-146.5			9289.37	-177.5			9215.67	-214.5
	9960.08	185			9960.08	141			9960.08	92			9960.08	-16.5			9960.08	4.5			9960.08	-111.5			9960.08	-146.5			9960.08	-171.5			9879.85	-202.5
	10679.2	185			10679.2	141			10679.2	92			10679.2	10.5			10679.2	10.5			10679.2	-108.5			10679.2	-152.5			10679.2	-185			10591.9	-190.5
	11450.3	185			11450.3	141			11450.3	92			11450.3	19.5			11450.3	16.5			11450.3	-111.5			11450.3	-155.5			11450.3	-182			11355.3	-184.5
	12277	185			12277	136.5			12277	92			12277	28.5			12277	22.5			12277	-123.5			12277	-149.5			12277	-189.5			12173.6	-180
	13163.5	185			13163.5	141			13163.5	92			13163.5	46.5			13163.5	31.5			13163.5	-117.5			13163.5	-167.5			13163.5	-186.5			13051	-180
	14113.9	185			14113.9	141			14113.9	92			14113.9	49.5			14113.9	45			14113.9	-125			14113.9	-155.5			14113.9	-189.5			13991.6	-180
	15132.9	185			15132.9	127.5			15132.9	92			15132.9	46.5			15132.9	43.5			15132.9	-123.5			15132.9	-152.5			15132.9	-185			15000	-180
	16225.6	185			16225.6	133.5			16225.6	92			16225.6	46.5			16225.6	45			16225.6	-120.5			16225.6	-143.5			16225.6	-177.5
	17397.1	185			17397.1	141			17397.1	92			17397.1	54			17397.1	45			17397.1	-108.5			17397.1	-134.5			17397.1	-149
	18653.2	185			18653.2	115.5			18653.2	92			18653.2	57			18653.2	45			18653.2	-99.5			18653.2	-116.5			18653.2	-135.5
	20000	185			20000	121.5			20000	92			20000	57			20000	45			20000	-90.5			20000	-107.5			20000	-125
[truncated: 10 more columns]

## Sheet: Fig.4C
Figure 4C
NBQX	Depth (um)	CF(Hz)
Yes	185	463.54
Yes	141	327.118
Yes	92	755.135
Yes	57	5318.3
Yes	45	215.3
Yes	-68	114.962
Yes	-88	13163.5
Yes	-95	7536.26
Yes	-180	230.506
Yes	624	614.904
Yes	517	659.396
Yes	410	498.645
Yes	366	573.415
Yes	302	758.27
Yes	273	871.969
Yes	197	806.686
No	1012	607.825
No	918	748.539
No	918	651.514
No	887	607.825
No	799	651.514
No	784	651.514
No	769	567.066
No	744	698.344
No	720	802.343
No	689	651.514
No	679	769.614
No	668	511.703
No	659	259.176
No	635	671.719
No	535	567.066
No	521	813.135
No	437	1002.72
No	391	922.088
No	374	1142.78
No	357	707.107
No	334	1236.5
No	279	1075.27
No	270	2291.17
No	176	4595.07
No	174	9289.37
No	171	6069.96
No	114	12277
No	35	12173.6
No	35	7564.63

## Sheet: Fig.4D
Figure 4D
NBQX	Depth (um)	SR(Spikes/s)
Yes	185	85.8
Yes	141	27.8667
Yes	92	21.5333
Yes	57	11.8
Yes	45	14.1333
Yes	-68	34.3333
Yes	-88	30.5333
Yes	-95	21
Yes	-180	2.33333
Yes	624	1
Yes	517	2.4
Yes	410	42.9333
Yes	366	1.13333
Yes	302	3.46667
Yes	273	9.8
Yes	197	1
No	1012	98.5333
No	918	6.26667
No	918	85.8667
No	887	107.267
No	799	86
No	784	7.13333
No	769	82.3333
No	744	47.4667
No	720	93
No	689	78.4
No	679	1.06667
No	668	82.3333
No	659	98.5333
No	635	5.2
No	535	67.8667
No	521	94.1333
No	437	79.6667
No	391	66.4667
No	374	0.133333
No	357	116.6
No	334	7.4
No	279	5.6
No	270	3.2
No	176	97.5333
No	174	0
No	171	11.2
No	114	102.533
No	35	47.0667
No	35	9.2

## Sheet: Fig.4E
Figure 4E
frequency (Hz)	Threshold (dB SPL)		frequency (Hz)	Threshold (dB SPL)		frequency (Hz)	Threshold (dB SPL)
53.5746	75		53.5746	79.5		100	66
57.4047	67.5		57.4047	78		107.146	67.5
61.5086	66.5		61.5086	75.5		114.802	67.5
65.9059	66.5		65.9059	73.5		123.005	68.5
70.6176	66.5		70.6176	71.5		131.794	69
75.6661	60.5		75.6661	70		141.212	66.5
81.0755	59.5		81.0755	66.5		151.302	66
86.8717	60		86.8717	62.5		162.114	65.5
93.0823	59.5		93.0823	57.5		173.698	63
99.7368	54.5		99.7368	52		186.109	59.5
106.867	53.5		106.867	49.5		199.408	60.5
114.507	54		114.507	49.5		213.657	61
122.693	52.5		122.693	51.5		228.924	63.5
131.465	53.5		131.465	52.5		245.282	58.5
140.863	55		140.863	53.5		262.809	57.5
150.934	58.5		150.934	59.5		281.588	57.5
161.724	58.5		161.724	59		301.709	59.5
173.286	51.5		173.286	57		323.268	57
185.675	50.5		185.675	55.5		346.367	52.5
198.949	49.5		198.949	51.5		371.117	53.5
213.172	50.5		213.172	50		397.635	53
228.412	50.5		228.412	49.5		426.049	54
244.741	53		244.741	48.5		456.492	52.5
262.238	54.5		262.238	52.5		489.111	54.5
280.985	53.5		280.985	48.5		524.061	53.5
301.073	53.5		301.073	48		561.508	55
322.598	55.5		322.598	46.5		601.631	56.5
345.66	56.5		345.66	49.5		644.621	58.5
370.372	50.5		370.372	54		690.683	57.5
396.85	51.5		396.85	53		740.037	57.5
425.222	53.5		425.222	51.5		792.917	56.5
455.621	55.5		455.621	50.5		849.575	58.5
488.194	51.5		488.194	50.5		910.282	58.5
523.095	55.5		523.095	50.5		975.327	62.5
560.492	49		560.492	49.5		1045.02	66.5
600.562	51.5		600.562	47		1119.69	67.5
643.497	47.5		643.497	45.5		1199.7	59.5
689.501	49		689.501	45.5		1285.43	54
738.795	50		738.795	47		1377.28	51
791.612	51.5		791.612	47.5		1475.69	50.5
848.205	50		848.205	48.5		1581.14	52.5
908.844	53.5		908.844	48		1694.12	53.5
973.818	55		973.818	55.5		1815.18	53.5
1043.44	57.5		1043.44	57.5		1944.88	53.5
1118.03	52.5		1118.03	55		2083.85	55
1197.96	53		1197.96	52.5		2232.76	54
1283.61	50		1283.61	53		2392.3	47.5
1375.37	49.5		1375.37	52		2563.24	48
1473.7	51.5		1473.7	50.5		2746.4	43.5
1579.06	51		1579.06	51		2942.65	25
1691.95	53.5		1691.95	48.5		3152.92	23.5
1812.9	55		1812.9	47.5		3378.21	11.5
1942.51	57.5		1942.51	46.5		3619.6	12
2081.38	59.5		2081.38	44.5		3878.25	11.5
2230.18	65.5		2230.18	44.5		4155.37	26.5
2389.62	65.5		2389.62	40		4452.29	39.5
2560.46	68		2560.46	38.5		4770.44	67.5
2743.51	73.5		2743.51	37		5111.31	90
2939.64	79.5		2939.64	34
3149.8	82.5		3149.8	37.5
3374.99	89.5		3374.99	35.5
3616.27	90		3616.27	41.5
			3874.8	52.5
			4151.81	90

## Sheet: Fig.4F
Figure 4F
frequency (Hz)	Threshold (dB SPL)		frequency (Hz)	Threshold (dB SPL)		frequency (Hz)	Threshold (dB SPL)
53.5746	90		53.5746	81.5		100	66
57.4047	90		57.4047	79.5		107.146	67.5
61.5086	80.5		61.5086	80		114.802	67.5
65.9059	76		65.9059	78		123.005	68.5
70.6176	78.5		70.6176	75.5		131.794	69
75.6661	77.5		75.6661	78.5		141.212	66.5
81.0755	69.5		81.0755	78		151.302	66
86.8717	68.5		86.8717	75.5		162.114	65.5
93.0823	68		93.0823	78		173.698	63
99.7368	67.5		99.7368	73.5		186.109	59.5
106.867	69.5		106.867	73.5		199.408	60.5
114.507	65		114.507	72.5		213.657	61
122.693	67.5		122.693	73		228.924	63.5
131.465	69.5		131.465	70.5		245.282	58.5
140.863	72.5		140.863	69.5		262.809	57.5
150.934	74.5		150.934	69.5		281.588	57.5
161.724	74		161.724	66.5		301.709	59.5
173.286	60		173.286	64.5		323.268	57
185.675	58.5		185.675	64.5		346.367	52.5
198.949	58		198.949	63		371.117	53.5
213.172	59.5		213.172	62.5		397.635	53
228.412	60		228.412	61.5		426.049	54
244.741	58.5		244.741	63		456.492	52.5
262.238	59.5		262.238	62.5		489.111	54.5
280.985	60		280.985	60.5		524.061	53.5
301.073	59.5		301.073	58.5		561.508	55
322.598	59.5		322.598	60		601.631	56.5
345.66	57.5		345.66	56.5		644.621	58.5
370.372	57		370.372	57.5		690.683	57.5
396.85	56.5		396.85	56.5		740.037	57.5
425.222	57		425.222	55.5		792.917	56.5
455.621	58.5		455.621	58.5		849.575	58.5
488.194	58		488.194	58.5		910.282	58.5
523.095	60.5		523.095	55		975.327	62.5
560.492	59		560.492	55.5		1045.02	66.5
600.562	59.5		600.562	53		1119.69	67.5
643.497	58		643.497	49.5		1199.7	59.5
689.501	57		689.501	46.5		1285.43	54
738.795	56.5		738.795	52.5		1377.28	51
791.612	59.5		791.612	49		1475.69	50.5
848.205	55.5		848.205	48		1581.14	52.5
908.844	55		908.844	46.5		1694.12	53.5
973.818	58.5		973.818	51.5		1815.18	53.5
1043.44	59.5		1043.44	62		1944.88	53.5
1118.03	61		1118.03	63		2083.85	55
1197.96	63		1197.96	63		2232.76	54
1283.61	64.5		1283.61	59.5		2392.3	47.5
1375.37	67		1375.37	57.5		2563.24	48
1473.7	69		1473.7	55.5		2746.4	43.5
1579.06	70.5		1579.06	52		2942.65	25
1691.95	73.5		1691.95	58.5		3152.92	23.5
1812.9	76.5		1812.9	57.5		3378.21	11.5
1942.51	80.5		1942.51	53.5		3619.6	12
2081.38	84.5		2081.38	53.5		3878.25	11.5
2230.18	86		2230.18	53		4155.37	26.5
2389.62	87.5		2389.62	51.5		4452.29	39.5
2560.46	90		2560.46	51		4770.44	67.5
			2743.51	48		5111.31	90
			2939.64	44.5
			3149.8	47.5
			3374.99	47.5
			3616.27	90

## Sheet: Fig.4G
Figure 4G
DPOAE 2f1-f2 (dB SPL)
		2 kHz			4 kHz
	time (h)	DPOAE	Background noise	norm. CM	DPOAE	Background noise	norm. CM
	-2.2	18.83	-17.14	NA	15.5	-15.06	NA
	0	NA	NA	0	NA	NA	0
	1.8	NA	NA	-0.1719	NA	NA	-0.06061
	3.3	NA	NA	-1.161	NA	NA	-1.955
	5.8	11.09	-18.06	-1.611	9.51	-16.74	-1.875
	10.9	10.32	-17.46	0.5506	8.06	-15.55	0.8773
	12.5	10.44	-17.67	0.2811	6	-16.07	0.05376
	16.6	-9.63	-18.2	-35.02	-11.18	-15.87	-33.76
